# Supplementary material for: Environmental Conditions for Alternative Tree Cover States in HighLatitudes
Source: Copernicus journal article supplement (doi:10.5194/bg-2016-401), 2016-10-11

# NCEP Vs CRU for MTmin

MTmin from NCEP/NCAR Reanalysis

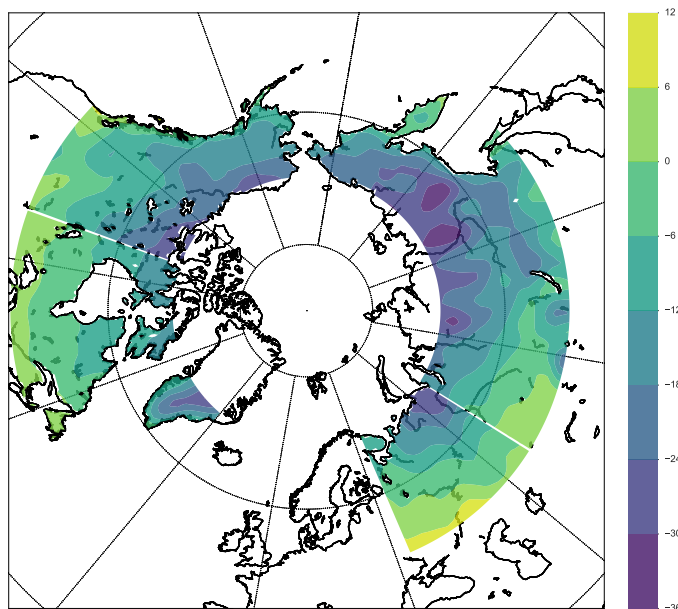

MTmin from CRU 3.22

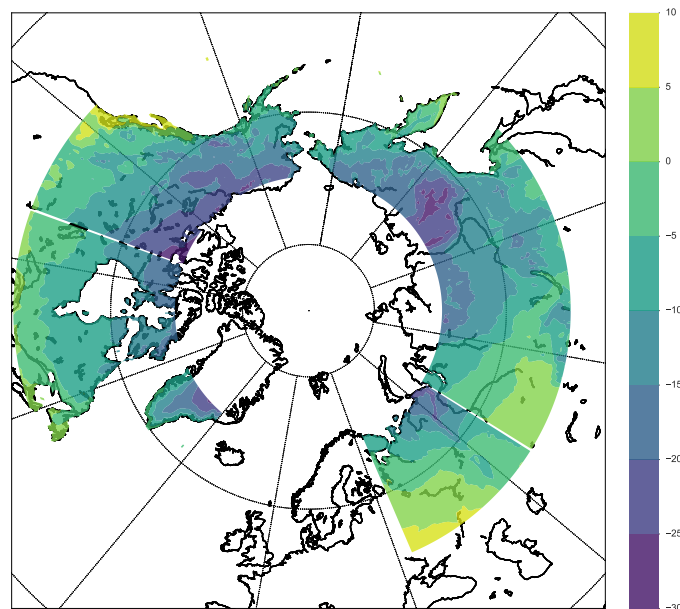

Diffplot of MTmin from CRU 3.22 and the NCEP/NCAR Reanalysis

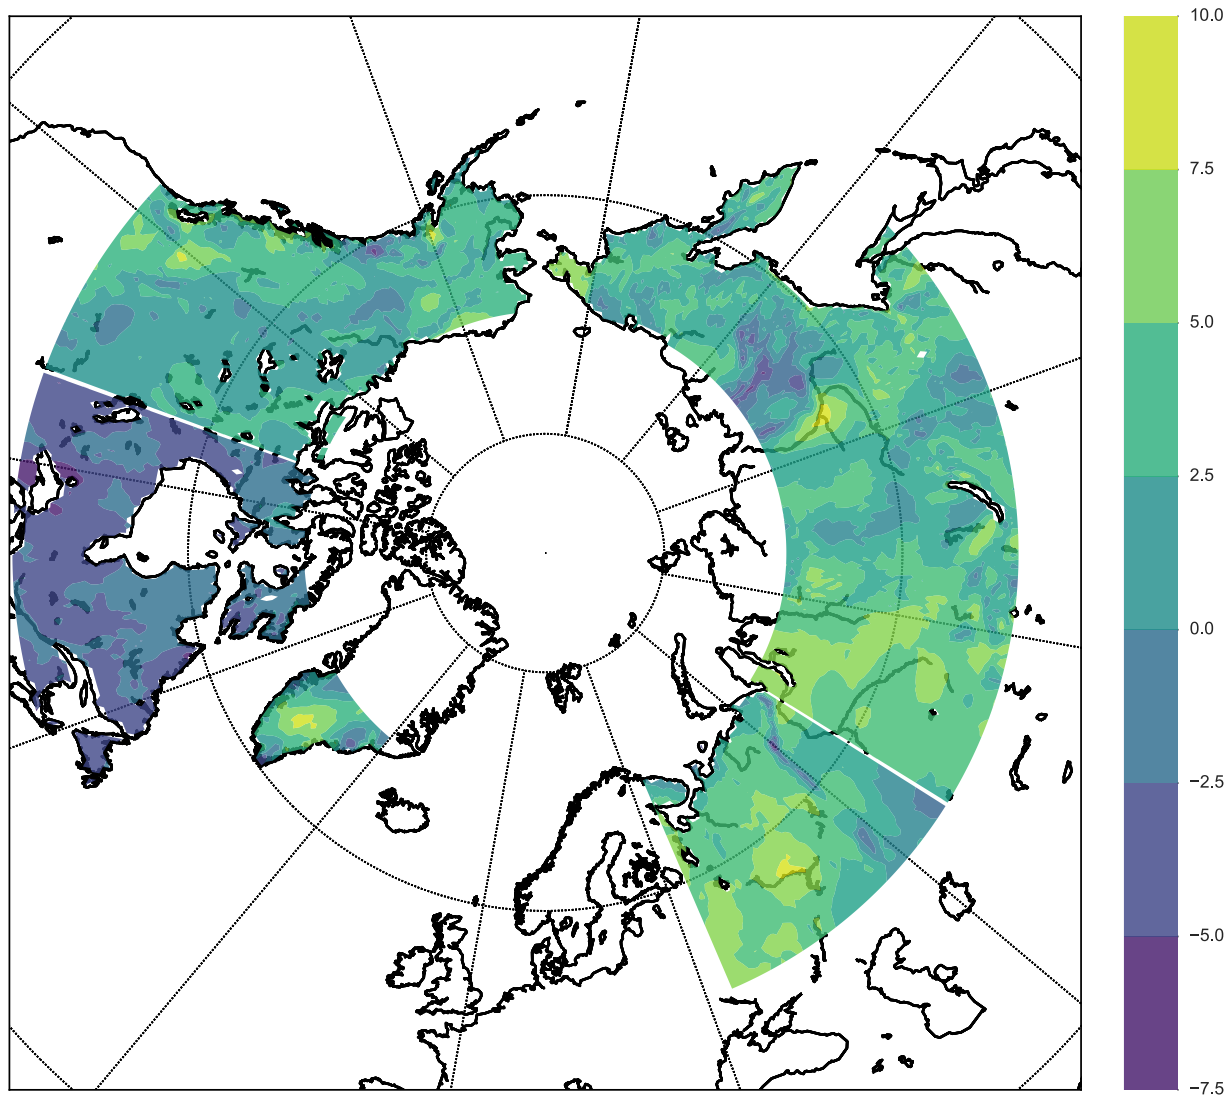

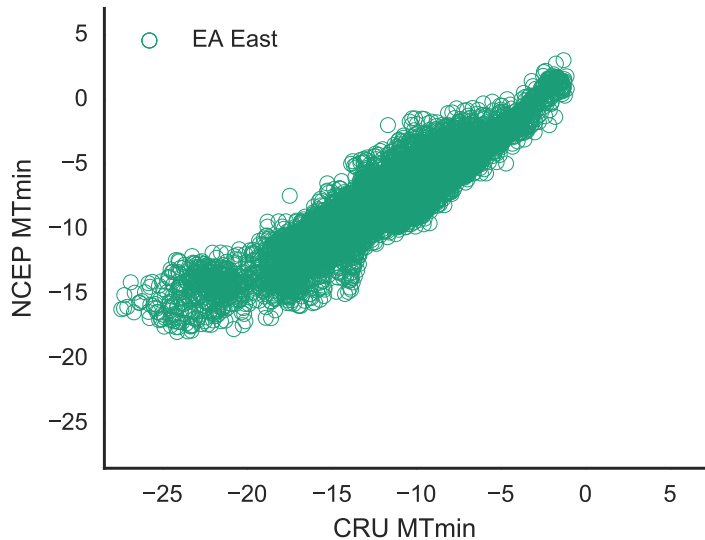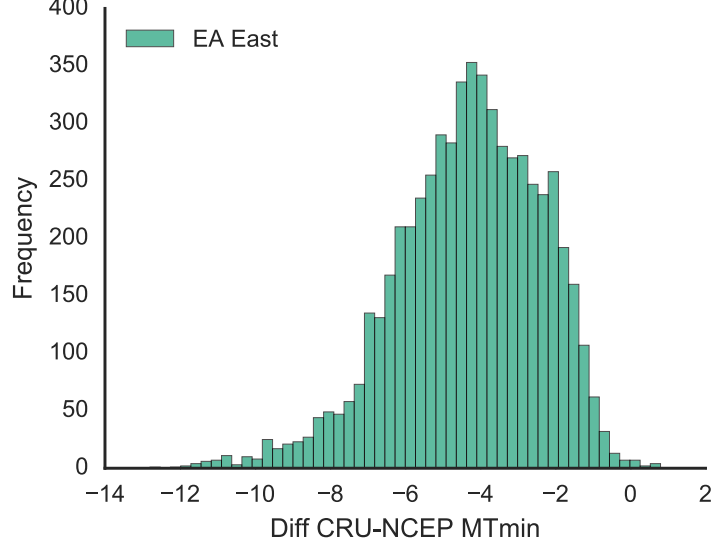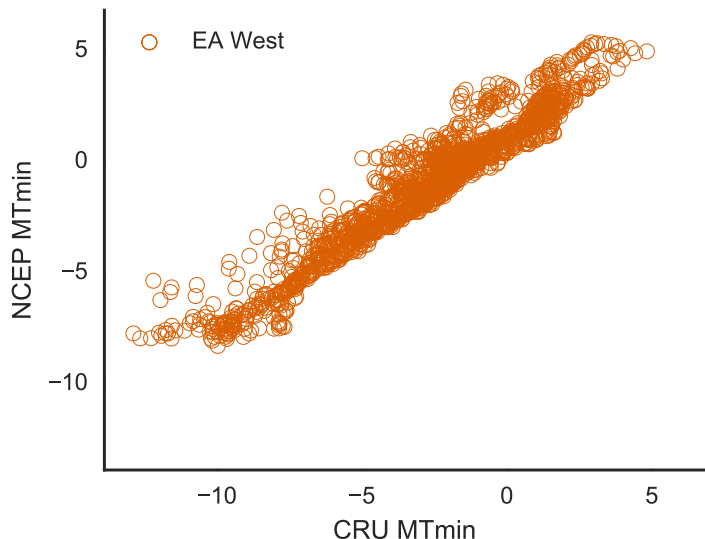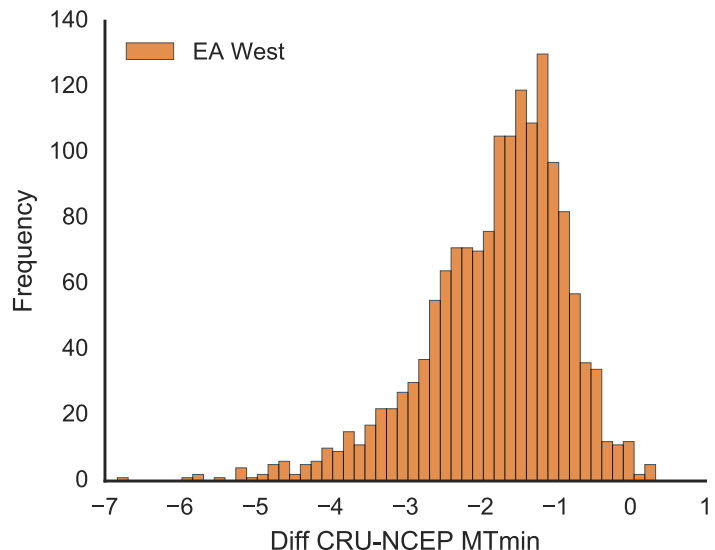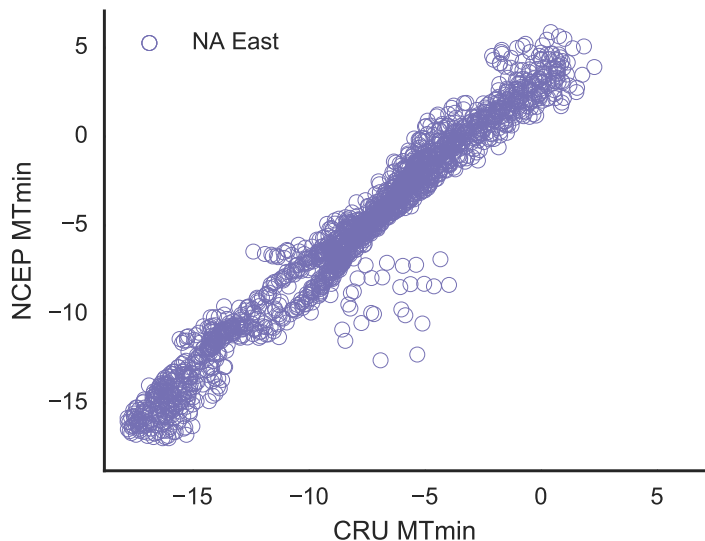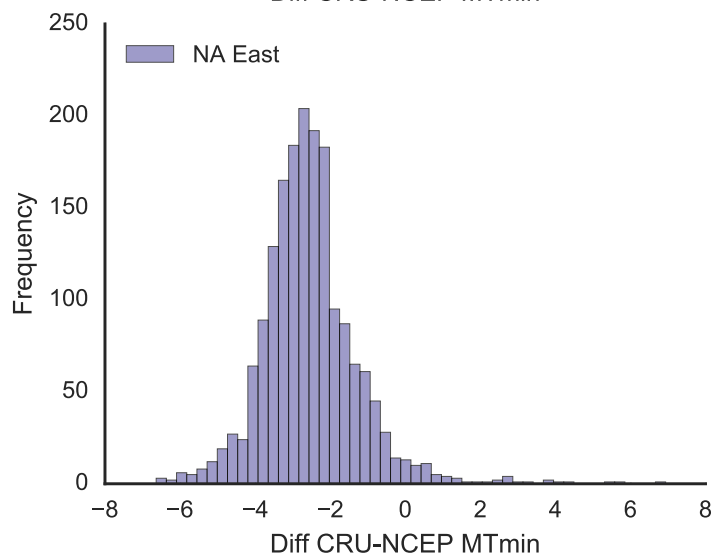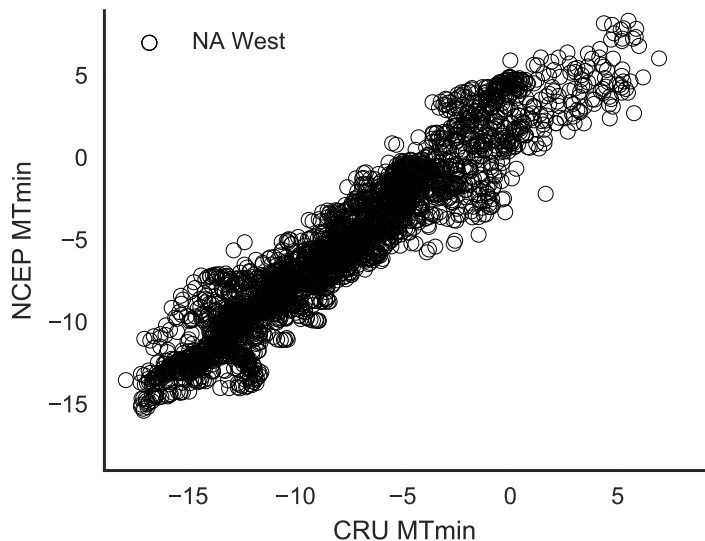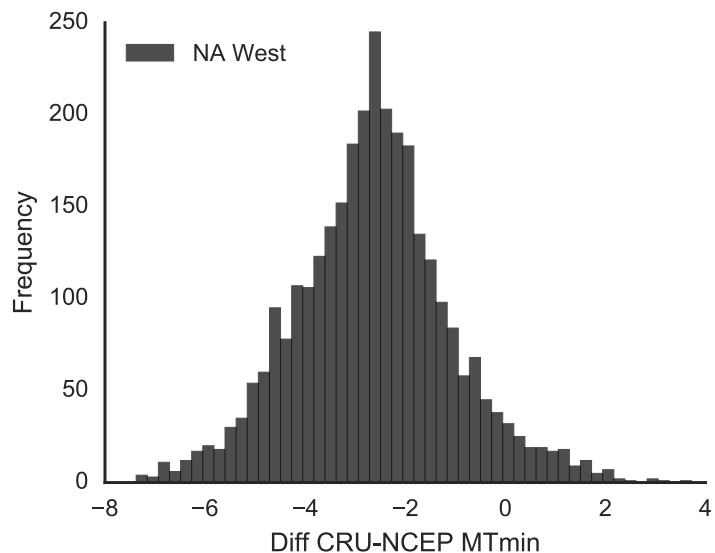

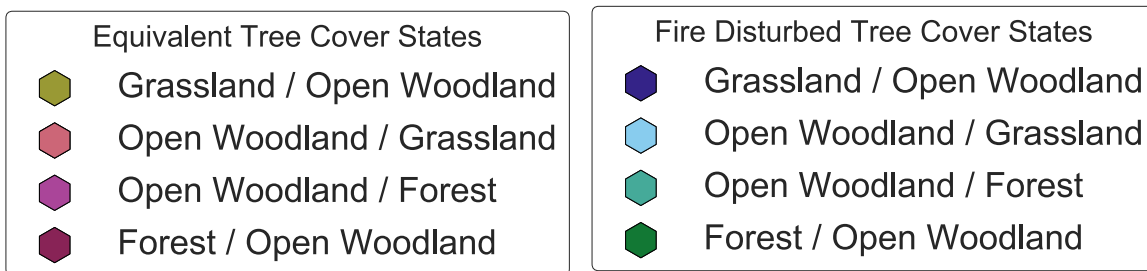

Possible Alternative Tree Cover States over Western North America

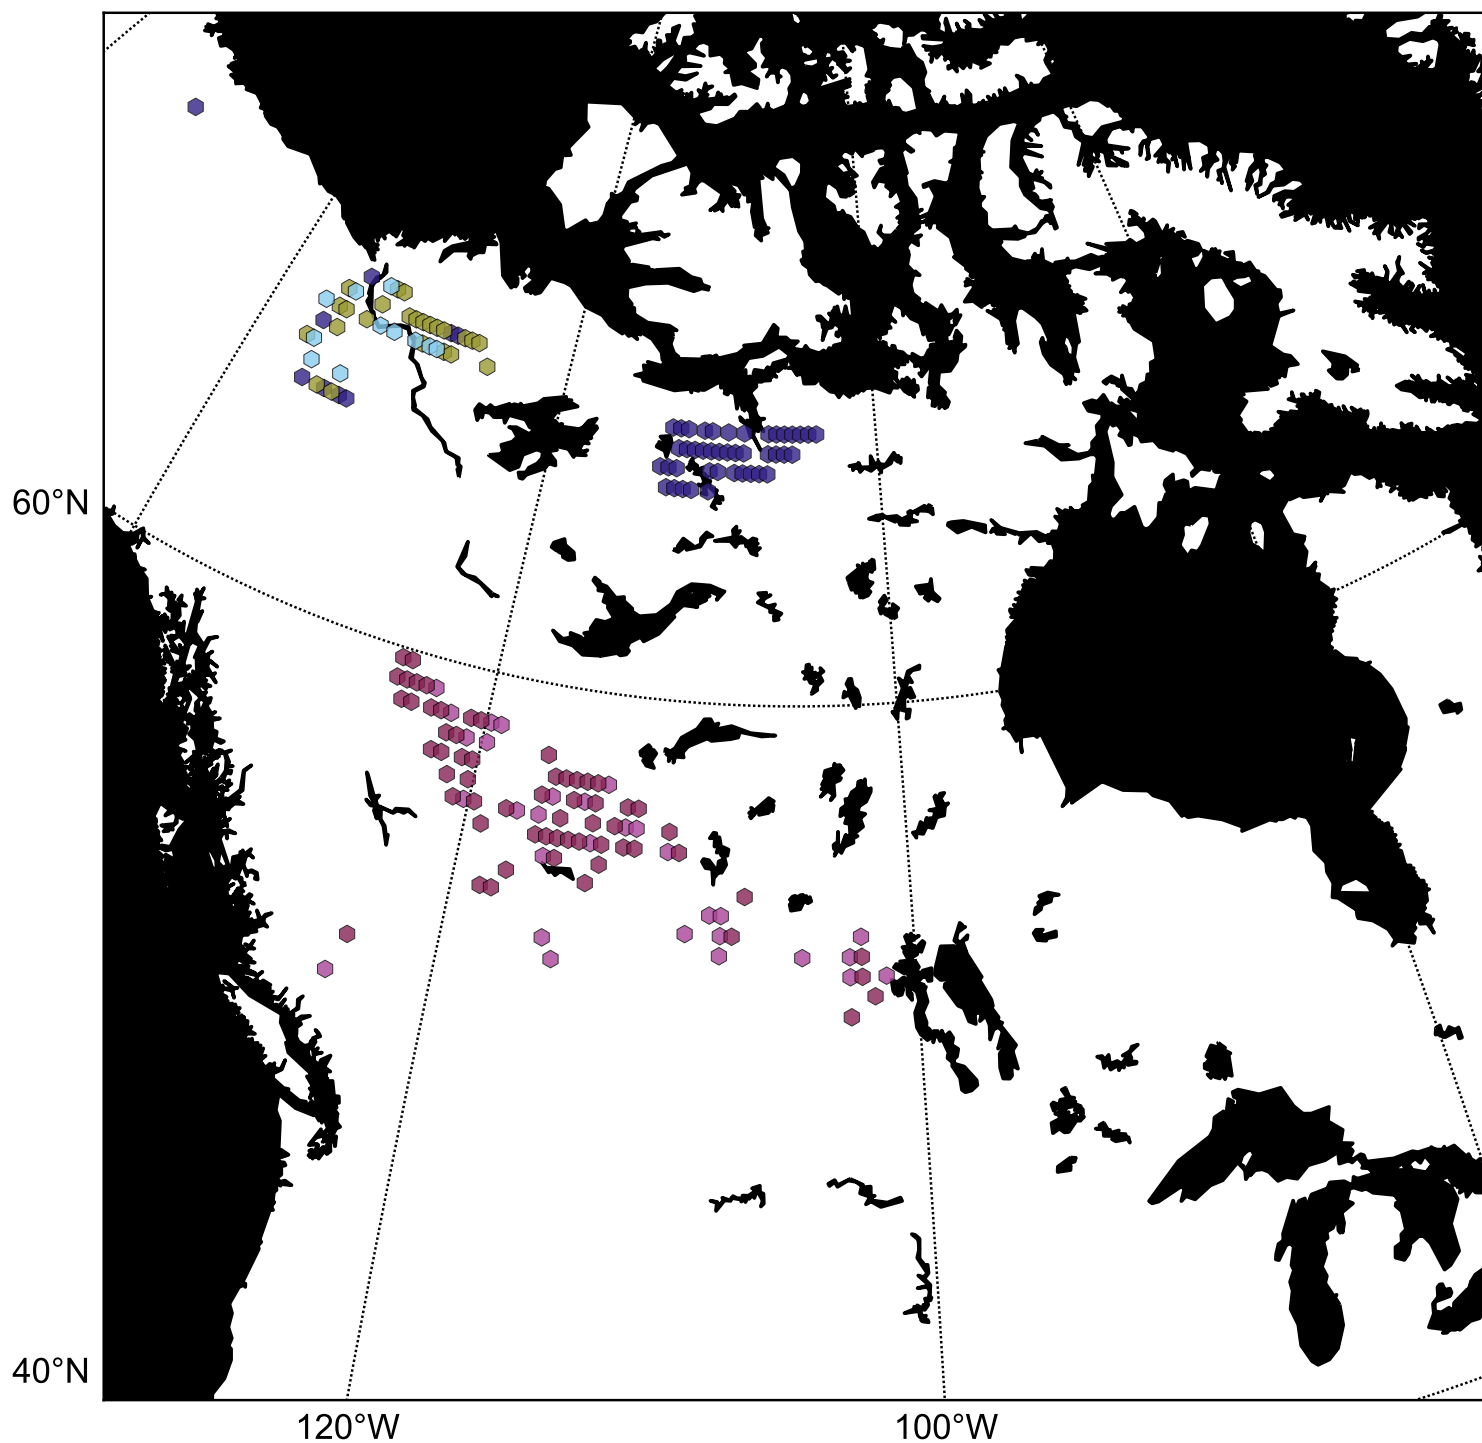

Equivalent Tree Cover States

- Grassland / Open Woodland
- Open Woodland / Grassland
- Open Woodland / Forest
- Forest / Open Woodland

Fire Disturbed Tree Cover States

- Grassland / Open Woodland
- Open Woodland / Grassland
- Open Woodland / Forest
- Forest / Open Woodland

Possible Alternative Tree Cover States over Eastern North America

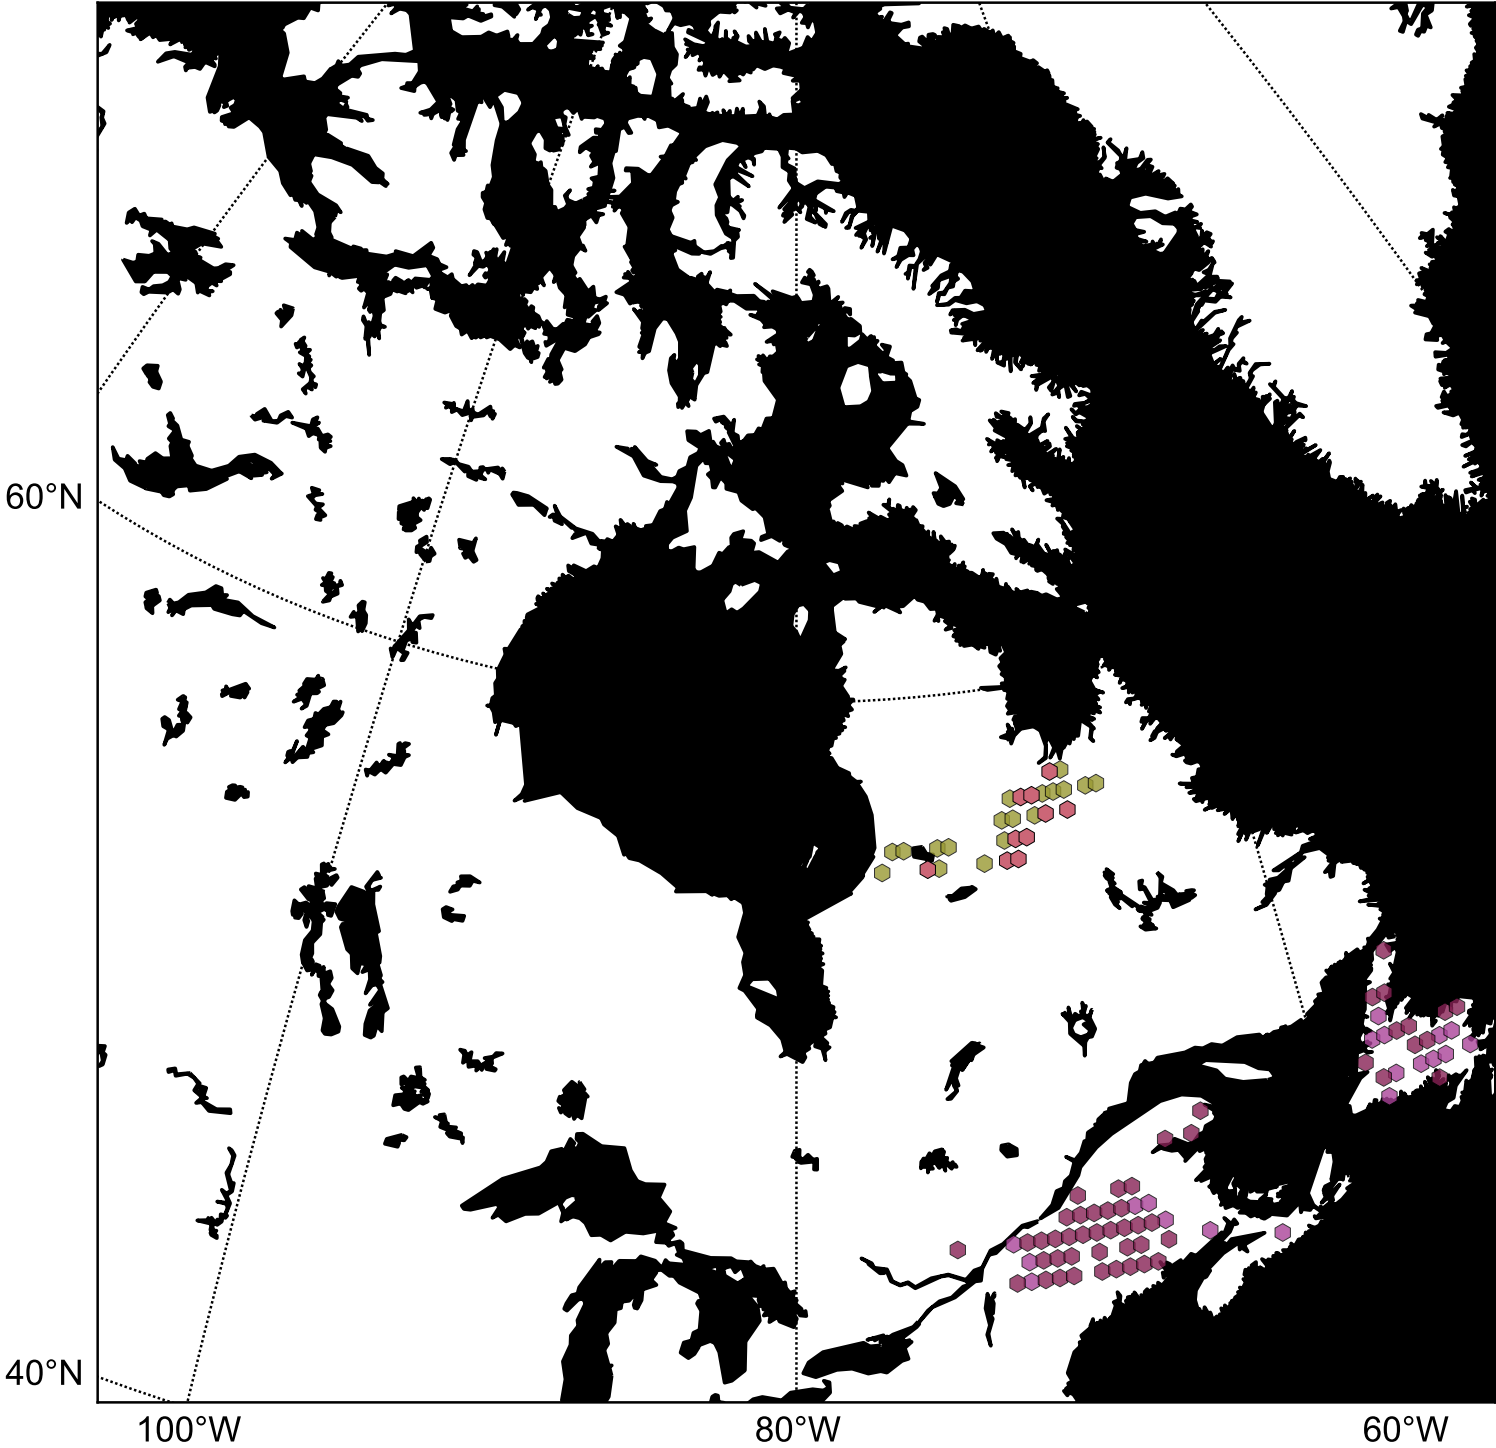



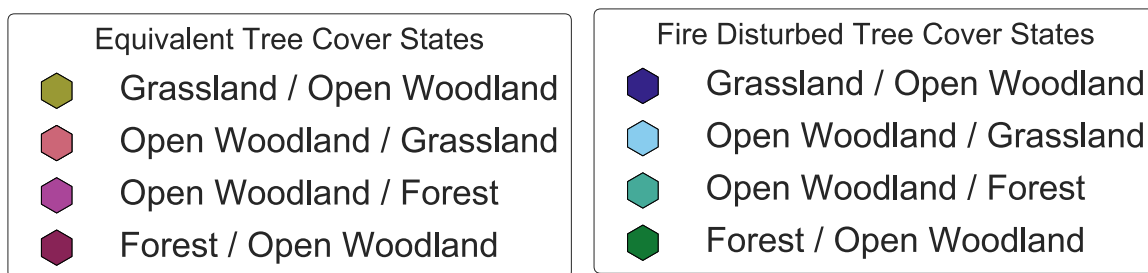

Possible Alternative Tree Cover States over Eastern North Eurasia

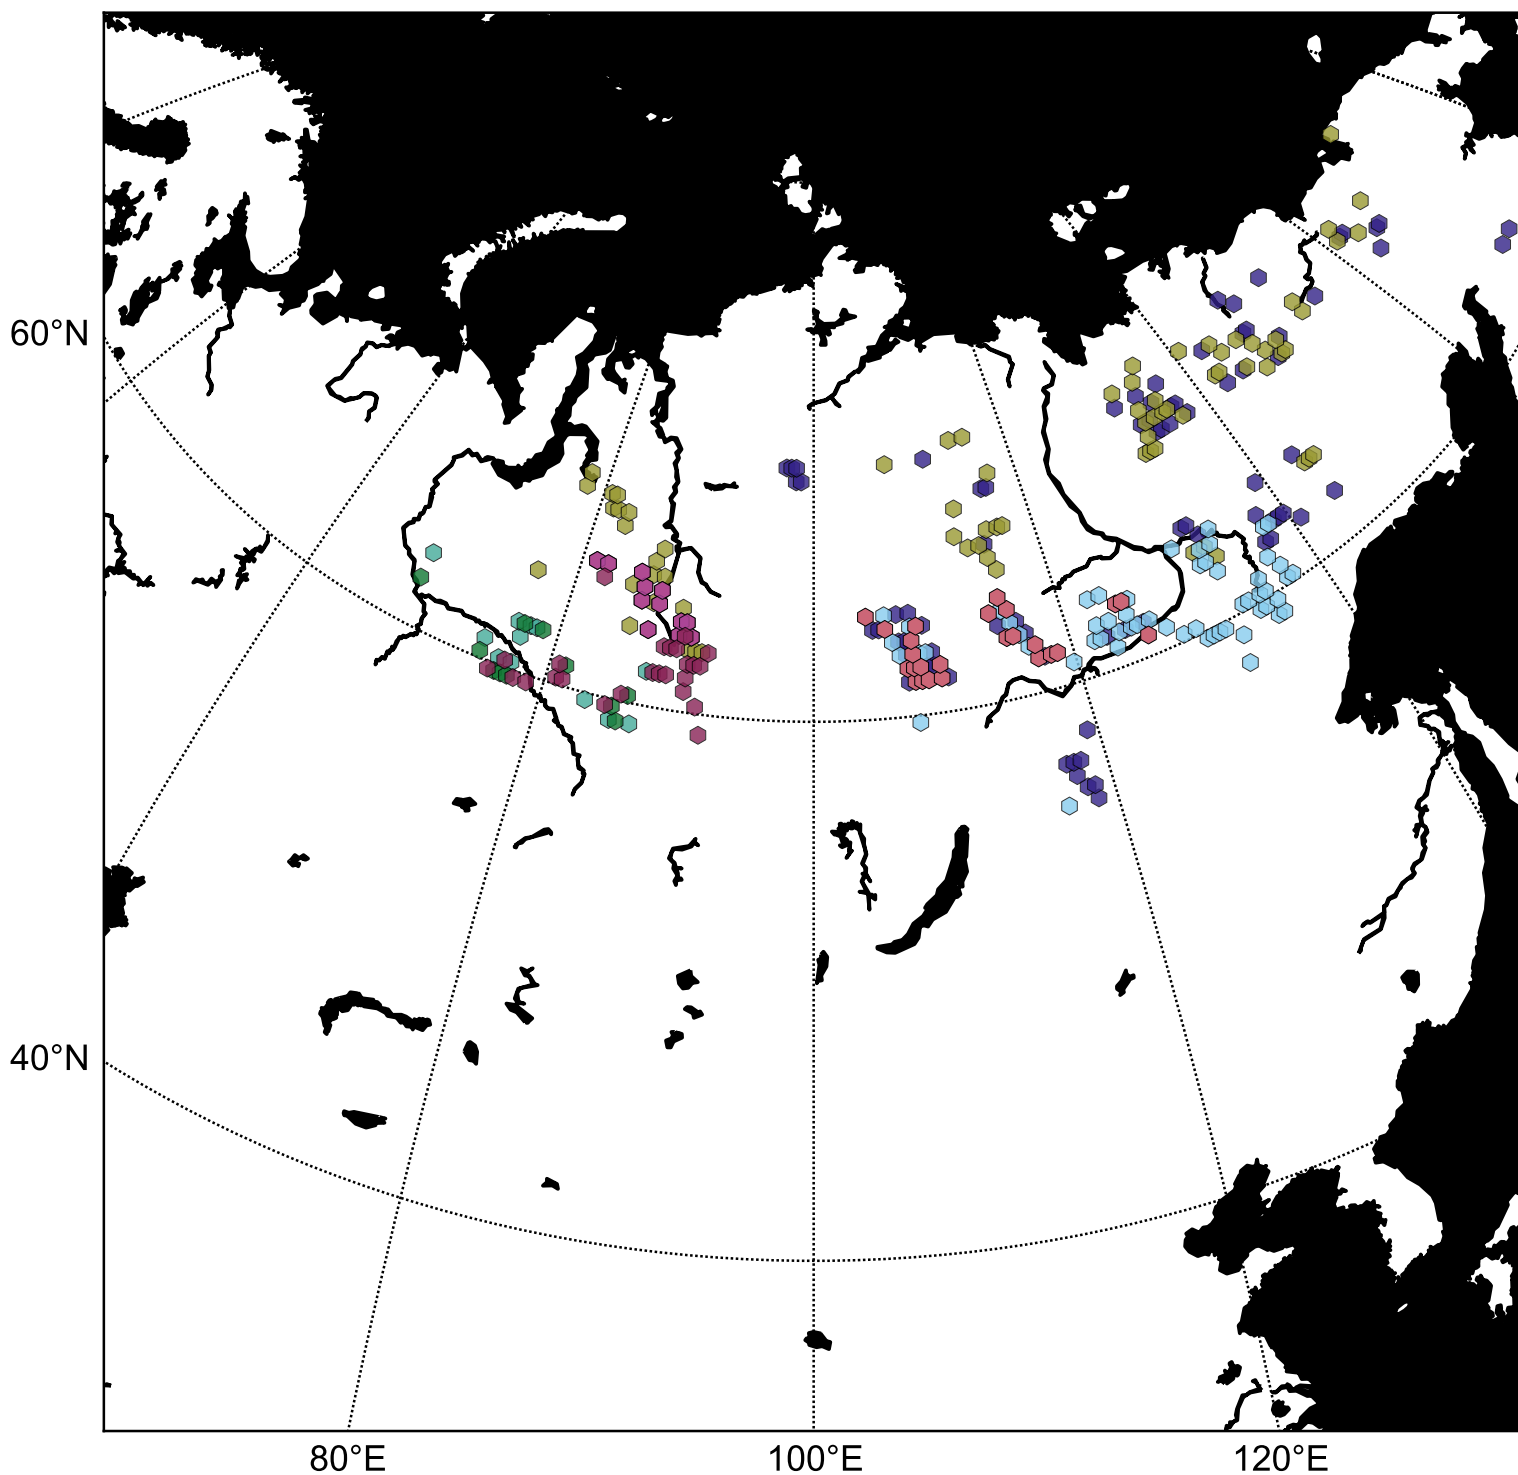

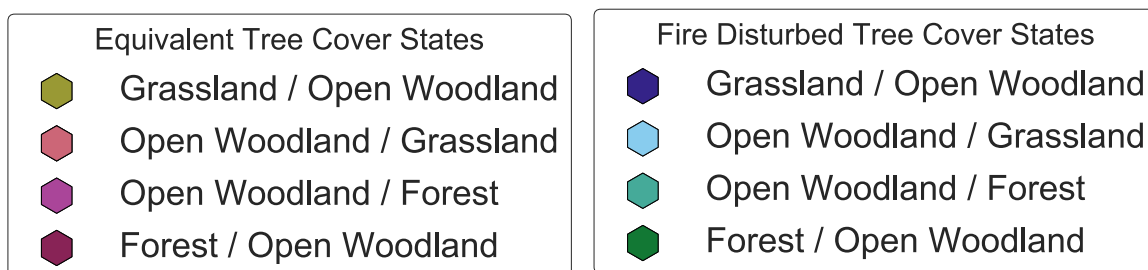

Possible Alternative Tree Cover States over Western North Eurasia

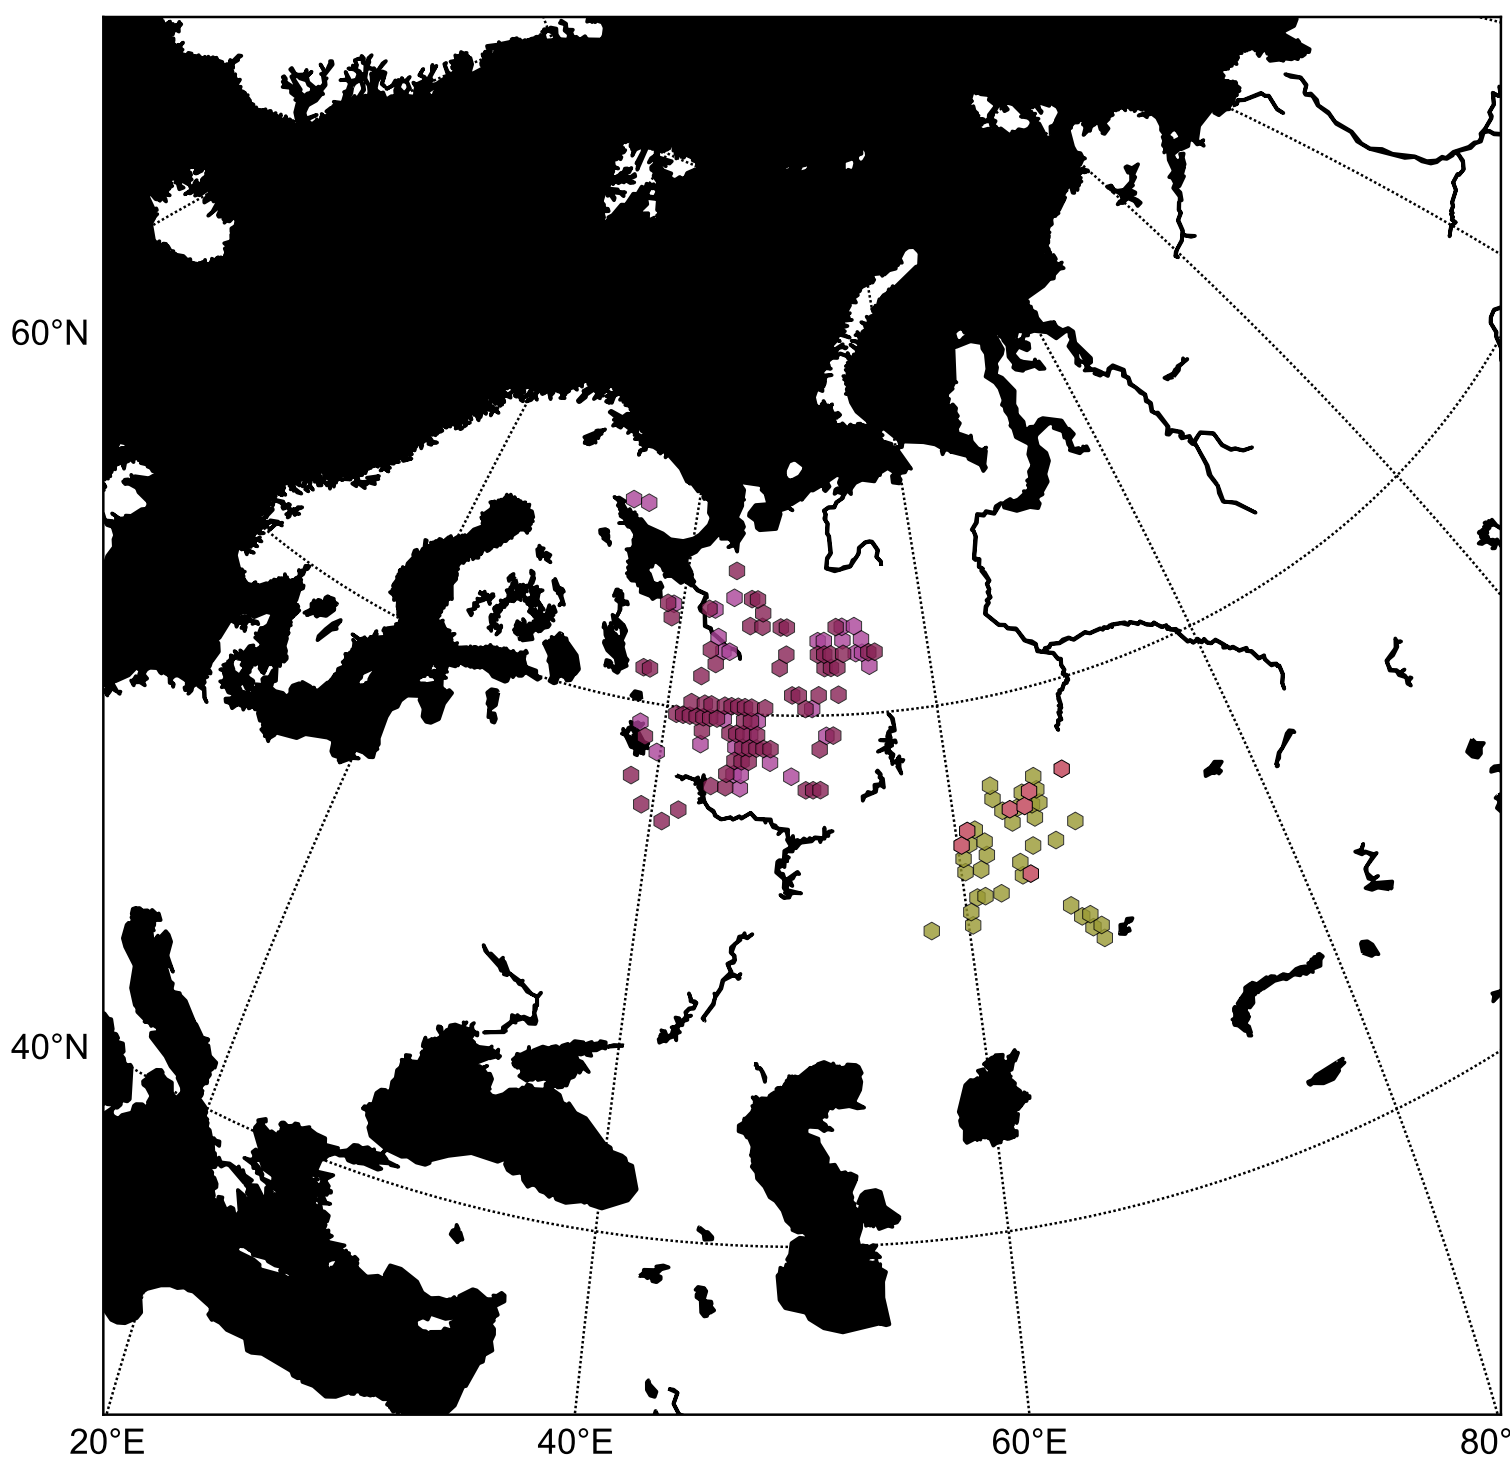

Alternative States using MTmin from CRU 3.22

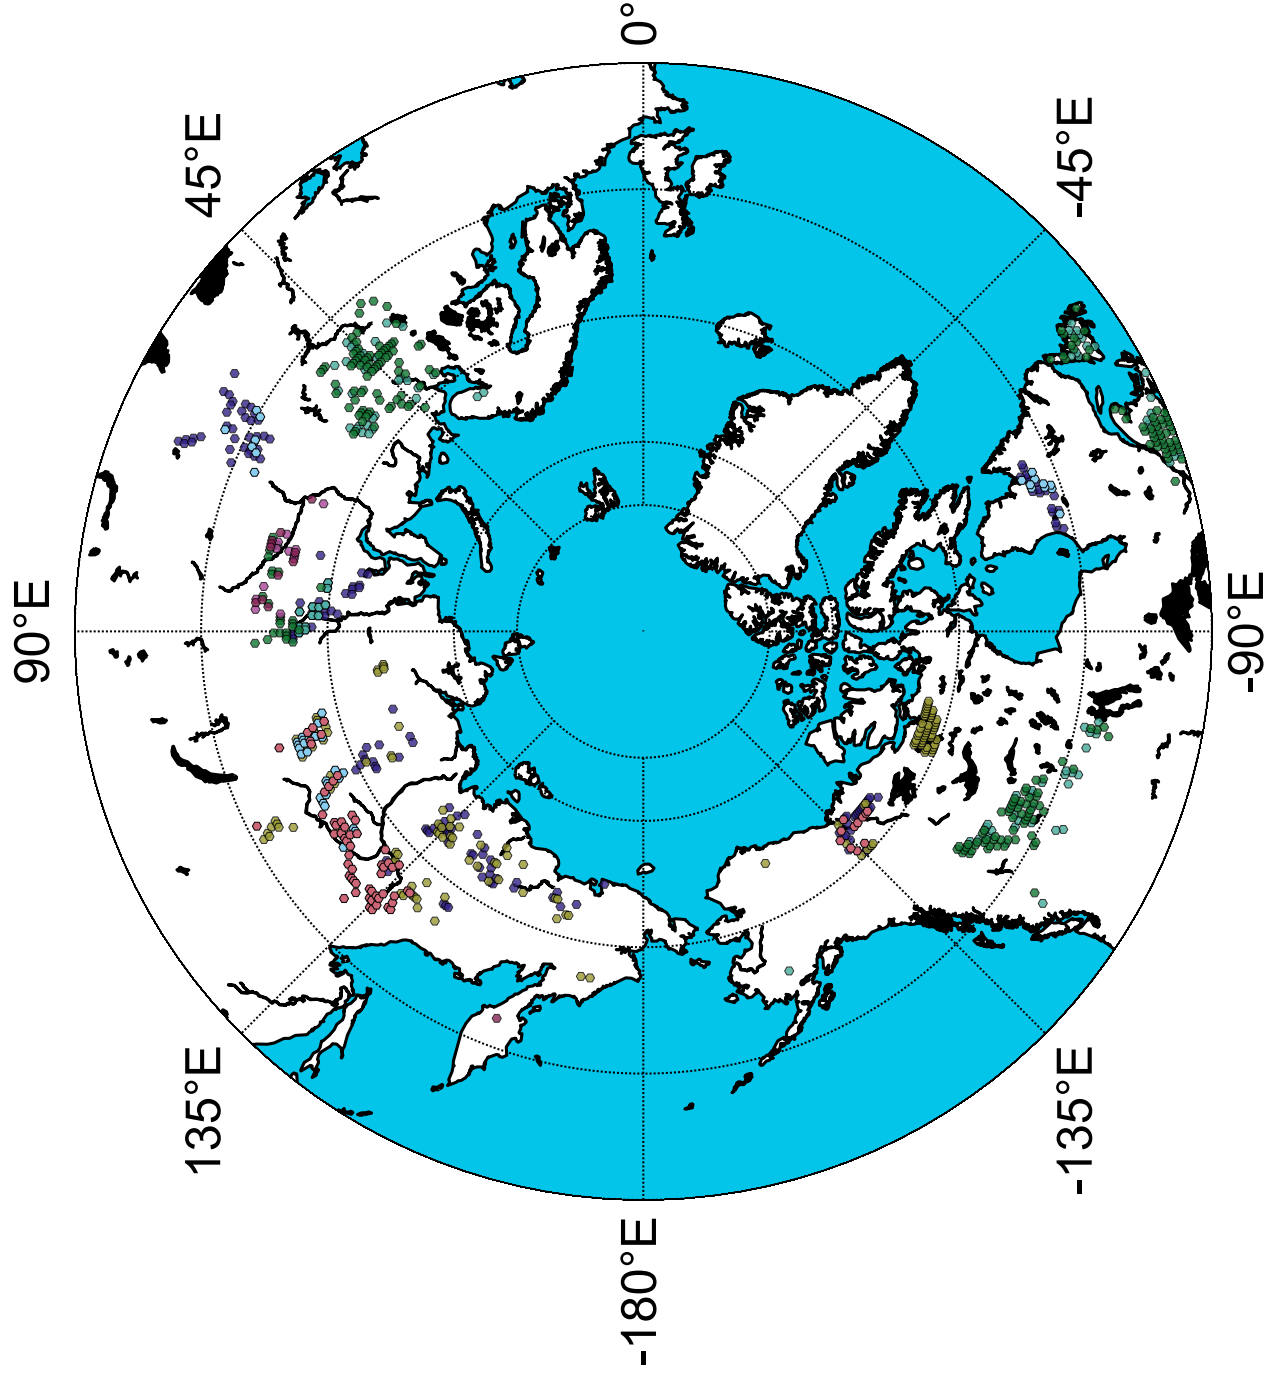

Equivalent Tree Cover States

- Treeless / Open Woodland
- Open Woodland / Treeless
- Open Woodland / Forest
- Forest / Open Woodland

Fire Disturbed Tree Cover States

- Treeless / Open Woodland
- Open Woodland / Treeless
- Open Woodland / Forest
- Forest / Open Woodland

Alternative States using MTmin from CRU 3.22

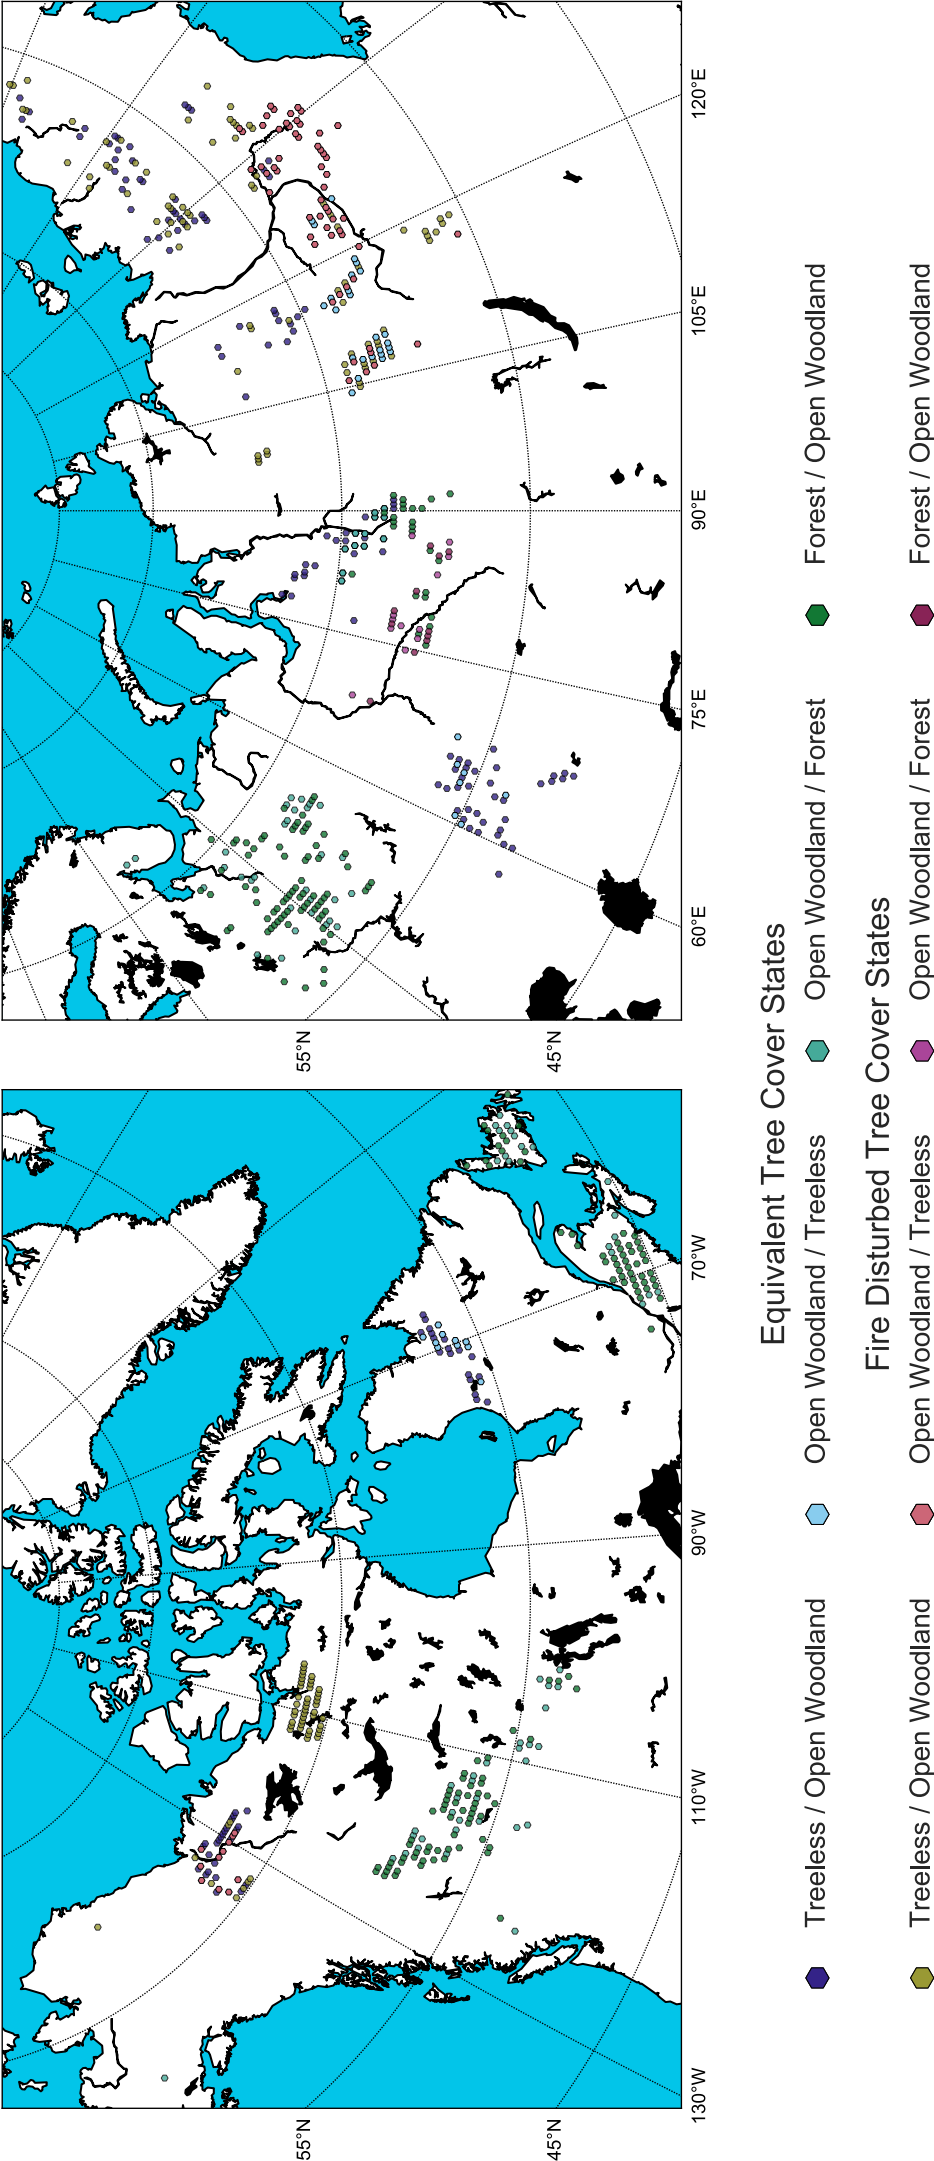

# Alternative States using MTmin from NCEP

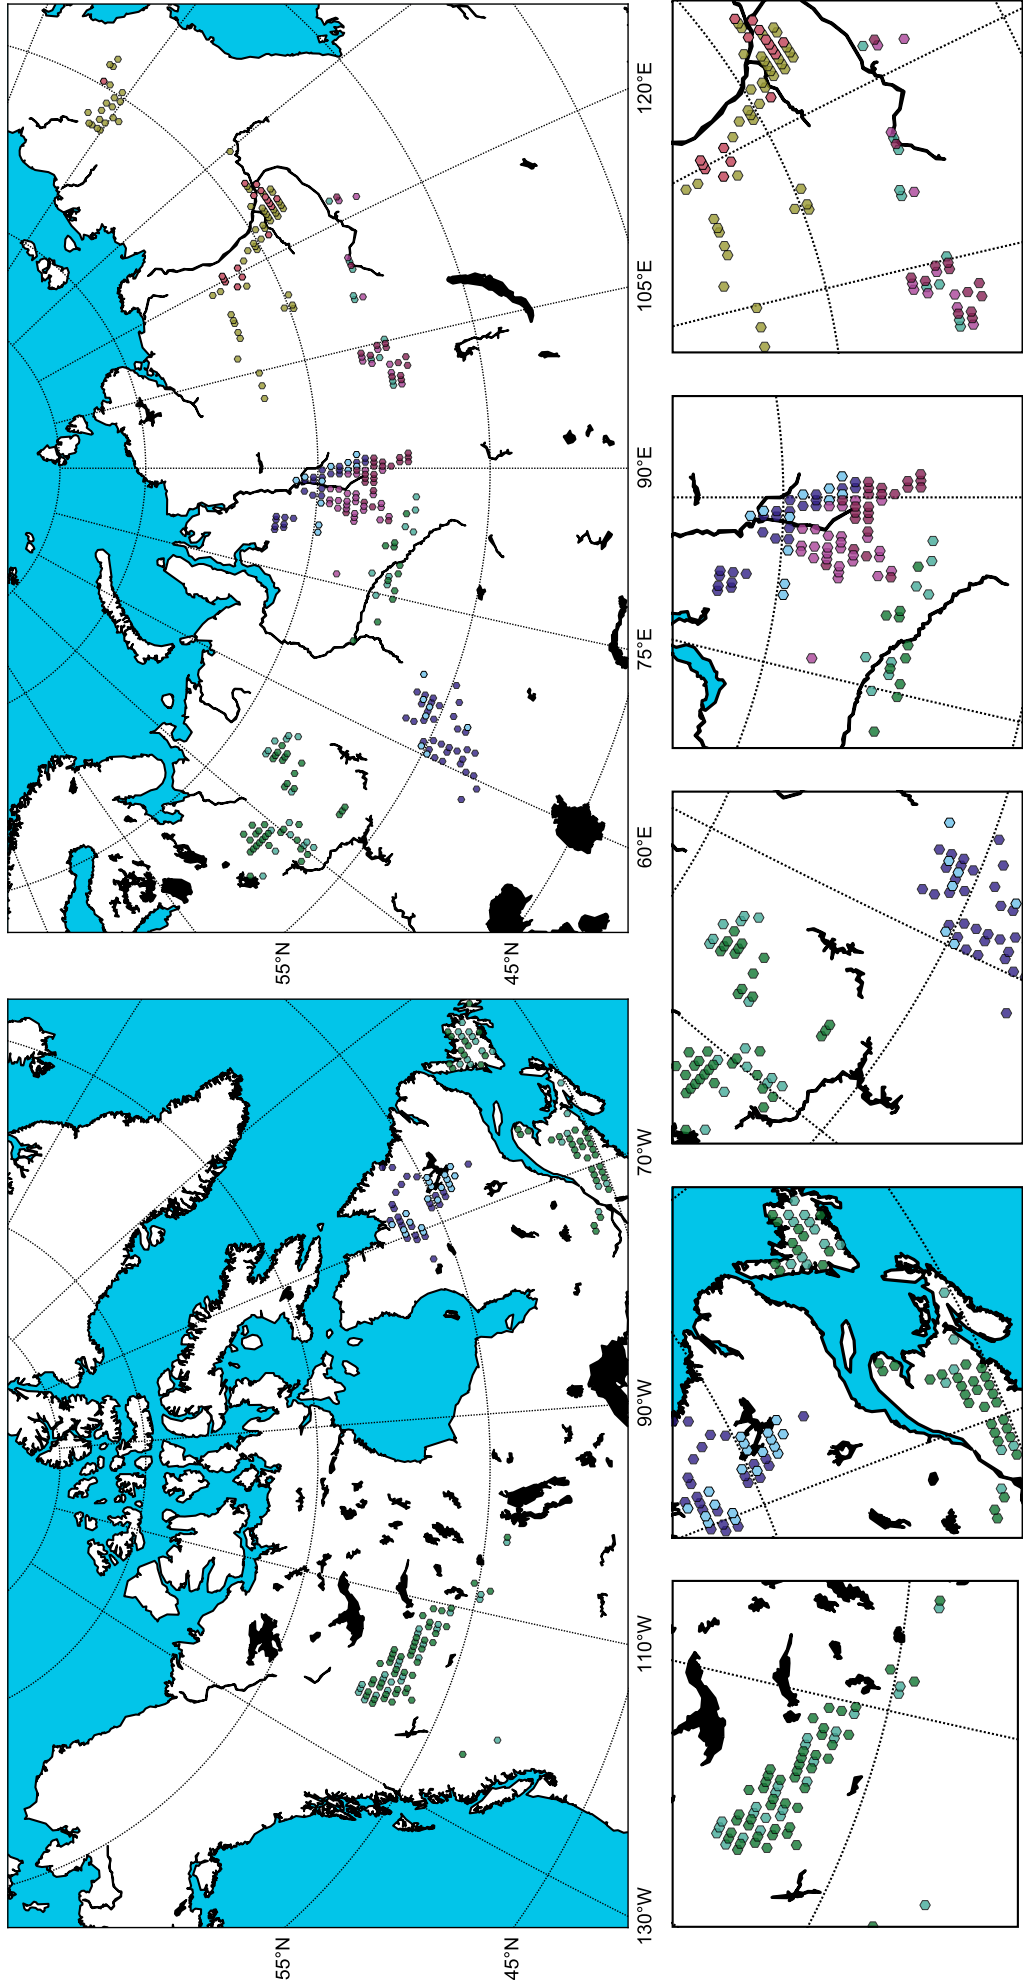

Supplement: Supplementary file 2 [file bg-2016-401-supplement.zip]
