# Supplementary material for: Environmental Conditions for Alternative Tree Cover States in HighLatitudes
Source: Copernicus journal article supplement (doi:10.5194/bg-2016-401), 2016-10-11
Supplement: Supplementary file 1 [file bg-2016-401-supplement.zip]

## Possible\_Alternative\_Classes

| Vegetation         | State | 3864x        | 1000x        | 216x        | 36x        | 6x        | 1x        | Count      | Count | Open       | Total | Corrected | Total     | NA_East Tot         | NA_West Tot         |
|--------------------|-------|--------------|--------------|-------------|------------|-----------|-----------|------------|-------|------------|-------|-----------|-----------|---------------------|---------------------|
| <b>NA_East</b>     |       |              |              |             |            |           |           |            |       |            |       |           |           | 102                 | 71                  |
| Treeless – Open    |       | 496          | 0            | 0           | 2          | 1         | 4         | 4          | 12    | 12         | 24    |           | <b>24</b> | <b>NA Total</b>     | <b>NA %</b>         |
| Treeless – Open    |       | 669          | 0            | 0           | 3          | 0         | 3         | 3          | 13    | 7          | 20    |           | <b>20</b> | 173                 | 3.55                |
| Forest – Open      |       | 216          | 0            | 0           | 0          | 5         | 5         | 6          | 40    | 18         | 58    |           | <b>58</b> |                     |                     |
| <b>NA_West</b>     |       |              |              |             |            |           |           |            |       |            |       |           |           |                     |                     |
| Forest – Open      |       | 4988         | 1            | 1           | 0          | 3         | 2         | 4          | 18    | 9          | 27    |           | <b>27</b> | <b>NEA_East Tot</b> | <b>NEA_West Tot</b> |
| Forest – Open      |       | 6988         | 1            | 3           | 0          | 3         | 2         | 4          | 29    | 15         | 44    |           | <b>44</b> | 297                 | 78                  |
| <b>NEA_East</b>    |       |              |              |             |            |           |           |            |       |            |       |           |           | <b>NEA Total</b>    | <b>NEA %</b>        |
| Treeless – Open    |       | 1539         | 0            | 1           | 2          | 2         | 5         | 5          | 24    | 11         | 35    |           | <b>35</b> | 375                 | 5.06                |
| Treeless – Open    |       | 5519         | 1            | 1           | 3          | 0         | 1         | 1          | 27    | 7          | 34    |           | <b>34</b> |                     |                     |
| Forest – Open      |       | 1519         | 0            | 1           | 2          | 2         | 2         | 3          | 13    | 10         | 23    |           | <b>23</b> | <b>Global Total</b> |                     |
| Forest – Open      |       | 1575         | 0            | 1           | 2          | 3         | 5         | 5          | 12    | 11         | 23    |           | <b>23</b> | 548                 |                     |
| Forest – Open      |       | 5439         | 1            | 1           | 2          | 3         | 5         | 5          | 11    | 10         | 21    |           | <b>21</b> | <b>Global %</b>     |                     |
| Forest – Open      |       | 5469         | 1            | 1           | 2          | 4         | 4         | 5          | 11    | 8          | 19    |           | <b>19</b> | 4.46                |                     |
| Open – FD Treeless |       | 1655         | 0            | 1           | 3          | 0         | 1         | 1          | 10    | 58         | 68    |           | <b>68</b> |                     |                     |
| Open – FD Treeless |       | 5519         | 1            | 1           | 3          | 0         | 1         | 1          | 7     | 35         | 42    |           | <b>35</b> |                     |                     |
| Open – FD Forest   |       | 1575         | 0            | 1           | 2          | 3         | 5         | 5          | 11    | 11         | 22    |           | <b>11</b> | NEA_East Count      | 5848                |
| Forest – FD Open   |       | 1519         | 0            | 1           | 2          | 2         | 2         | 3          | 13    | 11         | 24    |           | <b>11</b> | NEA_West Count      | 1559                |
| Forest – FD Open   |       | 1575         | 0            | 1           | 2          | 3         | 5         | 5          | 12    | 17         | 29    |           | <b>17</b> | NA_East Count       | 1775                |
| <b>NEA_West</b>    |       | <b>3864x</b> | <b>1000x</b> | <b>125x</b> | <b>25x</b> | <b>5x</b> | <b>1x</b> |            |       |            |       |           |           | NA_West Count       | 3094                |
| Treeless – Open    |       | 16532        | 4            | 1           | 0          | 3         | 0         | 1          | 33    | 7          | 40    |           | <b>40</b> |                     |                     |
| Forest – Open      |       | 69           | 0            | 0           | 0          | 2         | 3         | 4          | 11    | 7          | 18    |           | <b>18</b> |                     |                     |
| Forest – Open      |       | 1093         | 0            | 1           | 0          | 3         | 3         | 3          | 12    | 8          | 20    |           | <b>20</b> |                     |                     |
|                    |       |              |              |             |            |           |           | <b>319</b> |       | <b>272</b> |       |           |           |                     |                     |

\* the multipliers refer to the delimiters table

# Delimiters\_for\_Classification

## Boundaries of the bins used in the classification

| NA_East  |        | 0            | 1             | 2           | 3           | 4           | 5 | 6   |
|----------|--------|--------------|---------------|-------------|-------------|-------------|---|-----|
| Mtmin 1x | min    | -6.5598938   | -4.59024048   | -2.62058716 | -0.65093384 | 1.31871948  |   | max |
| MSSM 6x  | min    | 238.6162323  | 301.36865463  | 364.121077  | 426.8734993 | 489.6259216 |   | max |
| Mar 36x  | min    | 534.92769231 | 647.26615385  | 759.6046154 | 871.9430769 | 984.2815385 |   | max |
| PZI 216x | 0      | 0.08784264   | 0.17568529    | 0.64113535  | 1           |             |   |     |
| ST 1000x | 1,2,12 | 3,4,5,6,7,8  | 9,10,11,13,14 |             |             |             |   |     |
| FF 3864x | 0      | 0.07142857   | 0.14285714    | 0.37142857  | max         |             |   |     |

| EA_East  |        | 0            | 1             | 2           | 3           | 4           | 5 | 6   |
|----------|--------|--------------|---------------|-------------|-------------|-------------|---|-----|
| Mtmin 1x | min    | -10.55258484 | -8.54070816   | -6.52883148 | -4.5169548  | -2.50507812 |   | max |
| MSSM 6x  | min    | 155.10525055 | 199.30990486  | 243.5145592 | 287.7192135 | 331.9238678 |   | max |
| Mar 36x  | min    | 331.05461538 | 399.7775      | 468.5003846 | 537.2232692 | 605.9461539 |   | max |
| PZI 216x | 0      | 0.005        | 0.01          | 0.96617788  | 1           |             |   |     |
| ST 1000x | 1,2,12 | 3,4,5,6,7,8  | 9,10,11,13,14 |             |             |             |   |     |
| FF 3864x | 0      | 0.41176471   | 0.82352942    | 0.94117647  | max         |             |   |     |

| NA_West  |        | 0            | 1             | 2           | 3           | 4           | 5 | 6   |
|----------|--------|--------------|---------------|-------------|-------------|-------------|---|-----|
| Mtmin 1x | min    | -8.9262146   | -6.28965912   | -3.65310364 | -1.01654816 | 1.62000732  |   | max |
| MSSM 6x  | min    | 137.08544312 | 188.12585602  | 239.1662689 | 290.2066818 | 341.2470947 |   | max |
| Mar 36x  | min    | 191.75538462 | 284.905       | 378.0546154 | 471.2042308 | 564.3538462 |   | max |
| PZI 216x | 0      | 0.20119581   | 0.40239162    | 0.81965656  | 1           |             |   |     |
| ST 1000x | 1,2,12 | 3,4,5,6,7,8  | 9,10,11,13,14 |             |             |             |   |     |
| FF 3864x | 0      | 0.29411766   | 0.58823532    | 0.70588237  | max         |             |   |     |

| EA_West  |        | 0            | 1             | 2           | 3           | 4 | 5   |
|----------|--------|--------------|---------------|-------------|-------------|---|-----|
| Mtmin 1x | min    | -4.7621521   | -2.48579814   | -0.20944417 | 2.06690979  |   | max |
| MSSM 5x  | min    | 255.68252716 | 291.29510803  | 326.9076889 | 362.5202698 |   | max |
| Mar 25x  | min    | 520.01384615 | 567.5974359   | 615.1810256 | 662.7646154 |   | max |
| PZI 125x | 0      | 0.07051505   | 0.1410301     | 0.27735228  |             |   |     |
| ST 1000x | 1,2,12 | 3,4,5,6,7,8  | 9,10,11,13,14 |             |             |   |     |
| FF 3864x | 0      | 0.2647059    | 0.52941179    | 0.58823532  | max         |   |     |
