# Supplementary material for: Environmental Conditions for Alternative Tree Cover States in HighLatitudes
Source: Copernicus journal article supplement (doi:10.5194/bg-2016-401), 2016-10-11
Supplement: Supplementary file 4 [file bg-2016-401-supplement.zip]

Archive with 190 entries (183 files):
- Analysis/
- Analysis/.DS_Store
- Analysis/.ipynb_checkpoints/
- Analysis/.ipynb_checkpoints/2_GAMs_1000_Boreal_4_Regions-checkpoint.ipynb
- Analysis/.ipynb_checkpoints/3_Phasespace_Plots_East_Eurasia-checkpoint.ipynb
- Analysis/0_Dataset_Filtering_Boreal_4_Regions.ipynb
- Analysis/10_North_Eurasia_East_Classification.ipynb
- Analysis/11_North_Eurasia_West_Russia_Classification.ipynb
- Analysis/12_Boreal_Final_Classification_4_Regions_with_Plot.ipynb
- Analysis/13_Boreal_Variability_Bimodality_and_Trimodality.ipynb
- Analysis/1_Dataset_Plots_Boreal_4_Regions.ipynb
- Analysis/2_GAMs_1000_Boreal_4_Regions.ipynb
- Analysis/3_Phasespace_Plots_East_Eurasia.ipynb
- Analysis/4_Phasespace_Plots_West_Eurasia.ipynb
- Analysis/5_Phasespace_Plots_East_NorthAmerica.ipynb
- Analysis/6_Phasespace_Plots_West_NorthAmerica.ipynb
- Analysis/7_Bin_Division_for_Classification_Plot.ipynb
- Analysis/8_North_America_East_New_Classification.ipynb
- Analysis/9_North_America_West_New_Classification.ipynb
- Analysis/borealstates.pdf
- Analysis/canadian_fire_manipulation.R
- Analysis/files_to_load_and_import/
- Analysis/files_to_load_and_import/.DS_Store
- Analysis/files_to_load_and_import/boreal_database.txt
- Analysis/files_to_load_and_import/boreal_ea_database.txt
- Analysis/files_to_load_and_import/boreal_ea_east_database.txt
- Analysis/files_to_load_and_import/boreal_ea_east_database_lai_included.txt
- Analysis/files_to_load_and_import/boreal_ea_east_database_lai_ndvi_included.txt
- Analysis/files_to_load_and_import/boreal_ea_europe_database.txt
- Analysis/files_to_load_and_import/boreal_ea_west_database.txt
- Analysis/files_to_load_and_import/boreal_ea_west_database_lai_included.txt
- Analysis/files_to_load_and_import/boreal_ea_west_database_lai_ndvi_included.txt
- Analysis/files_to_load_and_import/boreal_ea_west_russia_database.txt
- Analysis/files_to_load_and_import/boreal_na_database.txt
- Analysis/files_to_load_and_import/boreal_na_east_database.txt
- Analysis/files_to_load_and_import/boreal_na_east_database_canadianupdate.txt
- Analysis/files_to_load_and_import/boreal_na_east_database_canadianupdate_without_soiltexture.txt
- Analysis/files_to_load_and_import/boreal_na_east_database_lai_included.txt
- Analysis/files_to_load_and_import/boreal_na_east_database_lai_ndvi_included.txt
- Analysis/files_to_load_and_import/boreal_na_east_nofire_database.txt
- Analysis/files_to_load_and_import/boreal_na_east_onlyfire_database.txt
- Analysis/files_to_load_and_import/boreal_na_sgauss_optim.txt
- Analysis/files_to_load_and_import/boreal_na_sgauss_scores.txt
- Analysis/files_to_load_and_import/boreal_na_sgauss_successes.txt
- Analysis/files_to_load_and_import/boreal_na_west_database.txt
- Analysis/files_to_load_and_import/boreal_na_west_database_canadianupdate.txt
- Analysis/files_to_load_and_import/boreal_na_west_database_canadianupdate_without_soiltexture.txt
- Analysis/files_to_load_and_import/boreal_na_west_database_lai_included.txt
- Analysis/files_to_load_and_import/boreal_na_west_database_lai_ndvi_included.txt
- Analysis/files_to_load_and_import/boreal_nea_database.txt
- Analysis/files_to_load_and_import/boreal_subsample_na.txt
- Analysis/files_to_load_and_import/Boreal_Variables.py
- Analysis/files_to_load_and_import/commonlai_bor.txt
- Analysis/files_to_load_and_import/commonlats_bor.txt
- Analysis/files_to_load_and_import/commonlons_bor.txt
- Analysis/files_to_load_and_import/commonndvi_bor.txt
- Analysis/files_to_load_and_import/commonstate_bor.txt
- Analysis/files_to_load_and_import/commontcf_bor.txt
- Analysis/files_to_load_and_import/datasets_after_classification/
- Analysis/files_to_load_and_import/datasets_after_classification/bare_ea_east_classified.pkl
- Analysis/files_to_load_and_import/datasets_after_classification/bare_ea_east_classified_with_SoilT.pkl
- Analysis/files_to_load_and_import/datasets_after_classification/bare_ea_west_classified.pkl
- Analysis/files_to_load_and_import/datasets_after_classification/bare_ea_west_russia_classified.pkl
- Analysis/files_to_load_and_import/datasets_after_classification/bare_ea_west_russia_classified_with_SoilT.pkl
- Analysis/files_to_load_and_import/datasets_after_classification/bare_east_classified.pkl
- Analysis/files_to_load_and_import/datasets_after_classification/bare_na_east_classified_with_SoilT.pkl
- Analysis/files_to_load_and_import/datasets_after_classification/bare_na_west_classified_with_SoilT.pkl
- Analysis/files_to_load_and_import/datasets_after_classification/bare_west_classified.pkl
- Analysis/files_to_load_and_import/datasets_after_classification/canadian_wildfires_1980-2014.csv
- Analysis/files_to_load_and_import/datasets_after_classification/forest_ea_east_classified.pkl
- Analysis/files_to_load_and_import/datasets_after_classification/forest_ea_east_classified_with_SoilT.pkl
- Analysis/files_to_load_and_import/datasets_after_classification/forest_ea_west_classified.pkl
- Analysis/files_to_load_and_import/datasets_after_classification/forest_ea_west_russia_classified.pkl
- Analysis/files_to_load_and_import/datasets_after_classification/forest_ea_west_russia_classified_with_SoilT.pkl
- Analysis/files_to_load_and_import/datasets_after_classification/forest_east_classified.pkl
- Analysis/files_to_load_and_import/datasets_after_classification/forest_na_east_classified_with_SoilT.pkl
- Analysis/files_to_load_and_import/datasets_after_classification/forest_na_west_classified_with_SoilT.pkl
- Analysis/files_to_load_and_import/datasets_after_classification/forest_west_classified.pkl
- Analysis/files_to_load_and_import/datasets_after_classification/savanna_ea_east_classified.pkl
- Analysis/files_to_load_and_import/datasets_after_classification/savanna_ea_east_classified_with_SoilT.pkl
- Analysis/files_to_load_and_import/datasets_after_classification/savanna_ea_west_classified.pkl
- Analysis/files_to_load_and_import/datasets_after_classification/savanna_ea_west_russia_classified.pkl
- Analysis/files_to_load_and_import/datasets_after_classification/savanna_ea_west_russia_classified_with_SoilT.pkl
- Analysis/files_to_load_and_import/datasets_after_classification/savanna_east_classified.pkl
- Analysis/files_to_load_and_import/datasets_after_classification/savanna_na_east_classified_with_SoilT.pkl
- Analysis/files_to_load_and_import/datasets_after_classification/savanna_na_west_classified_with_SoilT.pkl
- Analysis/files_to_load_and_import/datasets_after_classification/savanna_west_classified.pkl
- Analysis/files_to_load_and_import/ea_e_alt1_lolat.npy
- Analysis/files_to_load_and_import/ea_e_alt2_lolat.npy
- Analysis/files_to_load_and_import/ea_e_dist_lolat.npy
- Analysis/files_to_load_and_import/ea_w_alt1_lolat.npy
- Analysis/files_to_load_and_import/ea_w_alt2_lolat.npy
- Analysis/files_to_load_and_import/ea_w_dist_lolat.npy
- Analysis/files_to_load_and_import/forest_open_bor.txt
- Analysis/files_to_load_and_import/Functions.py
- Analysis/files_to_load_and_import/na_e_alt1_lolat.npy
- Analysis/files_to_load_and_import/na_e_alt2_lolat.npy
- Analysis/files_to_load_and_import/na_e_dist_lolat.npy
- Analysis/files_to_load_and_import/na_w_alt1_lolat.npy
- Analysis/files_to_load_and_import/na_w_alt2_lolat.npy
- Analysis/files_to_load_and_import/na_w_dist_lolat.npy
- Analysis/files_to_load_and_import/open_treless_bor.txt
- Analysis/files_to_load_and_import/orderednums.txt
- Analysis/scripts_python_version/
- Analysis/scripts_python_version/0_Boreal_Variability_and_Bimodality_and_Trimodality_forPaper.py
- Analysis/scripts_python_version/0_Dataset_Filtering_Boreal_4_Regions.py
- Analysis/scripts_python_version/10_North_Eurasia_East_Classification.py
- Analysis/scripts_python_version/11_North_Eurasia_West_Russia_Classification.py
- Analysis/scripts_python_version/12_Boreal_Final_Classification_4_Regions_with_Plot.py
- Analysis/scripts_python_version/13_Boreal_Variability_Bimodality_and_Trimodality.py
- Analysis/scripts_python_version/1_Dataset_Plots_Boreal_4_Regions.py
- Analysis/scripts_python_version/2_GAMs_1000_Boreal_4_Regions.py
- Analysis/scripts_python_version/3_Phasespace_Plots_East_Eurasia.py
- Analysis/scripts_python_version/4_Phasespace_Plots_West_Eurasia.py
- Analysis/scripts_python_version/5_Phasespace_Plots_East_NorthAmerica.py
- Analysis/scripts_python_version/6_Phasespace_Plots_West_NorthAmerica.py
- Analysis/scripts_python_version/7_Bin_Division_for_Classification_Plot.py
- Analysis/scripts_python_version/8_North_America_East_New_Classification.py
- Analysis/scripts_python_version/9_North_America_West_New_Classification.py
- CRU_Vs_NCEP_MTmin.pdf
- Data/
- Data/Bor_180_MOD44B_V5__VCFFplusVCF__2001-2010__0.5deg__UHAM-ICDC.nc
- Data/NA_East_Bor_Ease25_Northen_Emisphere_Mean_Thawing_Depth_1901-2002.nc
- Data/NA_East_bor_MTmin_cru_ts3.22.1998.2010.tmn.dat.nc
- Data/NA_East_Boreal_Mean_GDD0_1998-2010_0.5.nc
- Data/NA_East_seasonal_soilw.mon.mean.1998-2010.v2.nc
- Data/NA_East_shift_0_bor_0.5_PZI.nc
- Data/NA_East_shift_0_bor_M6H_0.5_tmin.2m.gauss.1998-2010.nc
- Data/NA_East_shift_bor_GLC2000_0.5.nc
- Data/NA_East_shift_Bor_MAR_cru_ts3.22.1998.2010.pre.dat.nc
- Data/NA_East_shift_Bor_MOD44B_V5__VCFFplusVCF__2010__0.5deg__UHAM-ICDC.nc
- Data/NA_East_shift_Bor_ReBil_GloElev_05.nc
- Data/NA_East_shift_masked_bor_0.5_Year_Fire_Frequency_1996-2012.nc
- Data/NA_East_soil_texture_0.5.nc
- Data/NA_West_Bor_Ease25_Northen_Emisphere_Mean_Thawing_Depth_1901-2002.nc
- Data/NA_West_bor_MTmin_cru_ts3.22.1998.2010.tmn.dat.nc
- Data/NA_West_Boreal_Mean_GDD0_1998-2010_0.5.nc
- Data/NA_West_seasonal_soilw.mon.mean.1998-2010.v2.nc
- Data/NA_West_shift_0_bor_0.5_PZI.nc
- Data/NA_West_shift_0_bor_M6H_0.5_tmin.2m.gauss.1998-2010.nc
- Data/NA_West_shift_bor_GLC2000_0.5.nc
- Data/NA_West_shift_Bor_MAR_cru_ts3.22.1998.2010.pre.dat.nc
- Data/NA_West_shift_Bor_MOD44B_V5__VCFFplusVCF__2010__0.5deg__UHAM-ICDC.nc
- Data/NA_West_shift_Bor_ReBil_GloElev_05.nc
- Data/NA_West_shift_masked_bor_0.5_Year_Fire_Frequency_1996-2012.nc
- Data/NA_West_soil_texture_0.5.nc
- Data/NEA_East_50_Bor_Ease25_Northen_Emisphere_Mean_Thawing_Depth_1901-2002.nc
- Data/NEA_East_50_bor_MTmin_cru_ts3.22.1998.2010.tmn.dat.nc
- Data/NEA_East_50_Boreal_Mean_GDD0_1998-2010_0.5.nc
- Data/NEA_East_50_seasonal_soilw.mon.mean.1998-2010.v2.nc
- Data/NEA_East_50_shift_0_bor_0.5_PZI.nc
- Data/NEA_East_50_shift_0_bor_M6H_0.5_tmin.2m.gauss.1998-2010.nc
- Data/NEA_East_50_shift_bor_GLC2000_0.5.nc
- Data/NEA_East_50_shift_Bor_MAR_cru_ts3.22.1998.2010.pre.dat.nc
- Data/NEA_East_50_shift_Bor_MOD44B_V5__VCFFplusVCF__2010__0.5deg__UHAM-ICDC.nc
- Data/NEA_East_50_shift_Bor_ReBil_GloElev_05.nc
- Data/NEA_East_50_shift_masked_bor_0.5_Year_Fire_Frequency_1996-2012.nc
- Data/NEA_East_50_soil_texture_0.5.nc
- Data/NEA_West_50_bor_MTmin_cru_ts3.22.1998.2010.tmn.dat.nc
- Data/NEA_West_Russia_50_Bor_Ease25_Northen_Emisphere_Mean_Thawing_Depth_1901-2002.nc
- Data/NEA_West_Russia_50_Boreal_Mean_GDD0_1998-2010_0.5.nc
- Data/NEA_West_Russia_50_seasonal_soilw.mon.mean.1998-2010.v2.nc
- Data/NEA_West_Russia_50_shift_0_bor_0.5_PZI.nc
- Data/NEA_West_Russia_50_shift_0_bor_M6H_0.5_tmin.2m.gauss.1998-2010.nc
- Data/NEA_West_Russia_50_shift_bor_GLC2000_0.5.nc
- Data/NEA_West_Russia_50_shift_Bor_MAR_cru_ts3.22.1998.2010.pre.dat.nc
- Data/NEA_West_Russia_50_shift_Bor_MOD44B_V5__VCFFplusVCF__2010__0.5deg__UHAM-ICDC.nc
- Data/NEA_West_Russia_50_shift_Bor_ReBil_GloElev_05.nc
- Data/NEA_West_Russia_50_shift_masked_bor_0.5_Year_Fire_Frequency_1996-2012.nc
- Data/NEA_West_Russia_50_soil_texture_0.5.nc
- Data/Terra_NA_East_MODIS_0.5_C6_GSSLAI_2000_2015_Decadal_Trend_SigOnly.nc
- Data/Terra_NA_East_MODIS_0.5_C6_GSSNDVI_2000_2015_Decadal_Trend_SigOnly.nc
- Data/Terra_NA_West_MODIS_0.5_C6_GSSLAI_2000_2015_Decadal_Trend_SigOnly.nc
- Data/Terra_NA_West_MODIS_0.5_C6_GSSNDVI_2000_2015_Decadal_Trend_SigOnly.nc
- Data/Terra_NEA_East_50_MODIS_0.5_C6_GSSLAI_2000_2015_Decadal_Trend_SigOnly.nc
- Data/Terra_NEA_East_50_MODIS_0.5_C6_GSSNDVI_2000_2015_Decadal_Trend_SigOnly.nc
- Data/Terra_NEA_West_Russia_50_MODIS_0.5_C6_GSSLAI_2000_2015_Decadal_Trend_SigOnly.nc
- Data/Terra_NEA_West_Russia_50_MODIS_0.5_C6_GSSNDVI_2000_2015_Decadal_Trend_SigOnly.nc
- GAM_Comparison/
- GAM_Comparison/EA EAST MTmin from CRU
- GAM_Comparison/EA EAST MTmin from NCEP
- GAM_Comparison/EA WEST MTmin from CRU
- GAM_Comparison/EA WEST MTmin from NCEP
- GAM_Comparison/GAM_Comparison.zip
- GAM_Comparison/NA EAST MTmin from CRU
- GAM_Comparison/NA EAST MTmin from NCEP
- GAM_Comparison/NA WEST MTmin from CRU
- GAM_Comparison/NA WEST MTmin from NCEP
- README.txt
- Supplementary_information.pdf
