# Supplementary material for: Environmental Conditions for Alternative Tree Cover States in HighLatitudes
Source: Copernicus journal article supplement (doi:10.5194/bg-2016-401), 2016-10-11
Supplement: Supplementary file 4 [file bg-2016-401-supplement.zip › Analysis/files_to_load_and_import/boreal_database.txt]

6.000000000000000000e+00 8.939076923076925141e+02 3.041753234863281250e+02 9.344726562500000000e+00 0.000000000000000000e+00 0.000000000000000000e+00 1.473168487548828125e+02
6.900000000000000000e+01 1.047484615384615381e+03 4.300962219238281250e+02 8.124877929687500000e+00 0.000000000000000000e+00 0.000000000000000000e+00 4.837304687500000000e+02
1.000000000000000000e+01 9.266076923076919911e+02 3.486308593750000000e+02 7.890533447265625000e+00 0.000000000000000000e+00 0.000000000000000000e+00 5.417729492187500000e+02
3.300000000000000000e+01 7.496769230769225487e+02 3.290672912597656250e+02 6.730560302734375000e+00 0.000000000000000000e+00 0.000000000000000000e+00 3.809897155761718750e+02
7.000000000000000000e+01 6.376769230769227761e+02 3.271971435546875000e+02 6.314788818359375000e+00 0.000000000000000000e+00 0.000000000000000000e+00 4.127864074707031250e+02
4.000000000000000000e+00 7.019538461538458023e+02 3.379502258300781250e+02 6.258270263671875000e+00 0.000000000000000000e+00 0.000000000000000000e+00 6.020910644531250000e+02
3.100000000000000000e+01 6.967538461538465526e+02 3.149191894531250000e+02 6.201751708984375000e+00 0.000000000000000000e+00 0.000000000000000000e+00 5.811096191406250000e+02
6.000000000000000000e+00 6.174384615384616382e+02 2.762324218750000000e+02 6.087493896484375000e+00 0.000000000000000000e+00 0.000000000000000000e+00 4.377872314453125000e+02
6.000000000000000000e+00 6.397461538461539021e+02 2.626277465820312500e+02 5.848907470703125000e+00 0.000000000000000000e+00 2.941176593303680420e-01 2.197875213623046875e+02
1.600000000000000000e+01 8.825923076923077133e+02 3.207739257812500000e+02 5.704772949218750000e+00 0.000000000000000000e+00 2.941176593303680420e-01 6.434946899414062500e+02
4.100000000000000000e+01 8.755307692307687830e+02 3.422472534179687500e+02 5.697357177734375000e+00 0.000000000000000000e+00 5.882353186607360840e-01 6.589221191406250000e+02
1.700000000000000000e+01 6.492846153846154493e+02 2.869523315429687500e+02 5.274169921875000000e+00 0.000000000000000000e+00 0.000000000000000000e+00 2.079707641601562500e+02
5.700000000000000000e+01 6.837615384615384073e+02 1.769397277832031250e+02 5.128265380859375000e+00 0.000000000000000000e+00 0.000000000000000000e+00 2.461745147705078125e+02
1.300000000000000000e+01 7.020307692307698062e+02 2.889843444824218750e+02 5.154327392578125000e+00 0.000000000000000000e+00 5.294117927551269531e-01 2.140594940185546875e+02
4.700000000000000000e+01 6.284769230769231854e+02 2.708836669921875000e+02 5.222900390625000000e+00 0.000000000000000000e+00 1.117647051811218262e+00 2.303730926513671875e+02
4.900000000000000000e+01 5.221769230769231172e+02 2.878174438476562500e+02 5.418853759765625000e+00 0.000000000000000000e+00 1.058823585510253906e+00 2.390455169677734375e+02
6.600000000000000000e+01 5.407538461538462116e+02 2.917043151855468750e+02 5.673645019531250000e+00 0.000000000000000000e+00 8.235294222831726074e-01 2.249753265380859375e+02
2.100000000000000000e+01 5.956538461538464162e+02 2.652028808593750000e+02 5.789001464843750000e+00 0.000000000000000000e+00 2.352941185235977173e-01 2.212607116699218750e+02
7.000000000000000000e+00 5.999538461538460297e+02 2.668157653808593750e+02 5.629852294921875000e+00 0.000000000000000000e+00 2.352941185235977173e-01 9.913691711425781250e+01
8.000000000000000000e+00 5.858769230769230489e+02 2.719126586914062500e+02 4.976531982421875000e+00 0.000000000000000000e+00 2.176470518112182617e+00 1.128058624267578125e+02
1.100000000000000000e+01 5.771692307692309214e+02 2.453027343750000000e+02 4.890014648437500000e+00 0.000000000000000000e+00 1.823529362678527832e+00 1.376412353515625000e+02
1.000000000000000000e+00 5.086000000000001364e+02 1.948757781982421875e+02 5.121643066406250000e+00 0.000000000000000000e+00 1.941176414489746094e+00 1.410500335693359375e+02
2.000000000000000000e+00 4.949615384615383959e+02 1.873354339599609375e+02 5.001281738281250000e+00 0.000000000000000000e+00 2.000000000000000000e+00 1.269865188598632812e+02
7.000000000000000000e+00 4.666153846153843574e+02 1.867353668212890625e+02 4.933166503906250000e+00 0.000000000000000000e+00 1.470588207244873047e+00 1.366279449462890625e+02
0.000000000000000000e+00 4.397076923076921275e+02 1.676246032714843750e+02 4.753540039062500000e+00 0.000000000000000000e+00 2.411764621734619141e+00 1.193383712768554688e+02
1.000000000000000000e+00 3.490076923076922526e+02 1.489605712890625000e+02 5.210510253906250000e+00 0.000000000000000000e+00 1.705882310867309570e+00 4.948295593261718750e+01
4.000000000000000000e+00 3.338692307692307963e+02 1.414686431884765625e+02 5.265106201171875000e+00 0.000000000000000000e+00 2.470588207244873047e+00 4.101073837280273438e+01
1.000000000000000000e+00 3.232692307692306031e+02 1.307748718261718750e+02 5.304626464843750000e+00 0.000000000000000000e+00 2.529411792755126953e+00 3.416706466674804688e+01
1.000000000000000000e+00 3.304846153846155516e+02 1.218658523559570312e+02 5.344146728515625000e+00 0.000000000000000000e+00 1.117647051811218262e+00 2.636934661865234375e+01
1.000000000000000000e+00 3.415153846153845052e+02 1.184164276123046875e+02 5.383666992187500000e+00 0.000000000000000000e+00 2.117647171020507812e+00 1.766300392150878906e+01
1.000000000000000000e+00 3.446230769230768942e+02 1.142381286621093750e+02 5.307006835937500000e+00 0.000000000000000000e+00 1.882352948188781738e+00 1.249991226196289062e+01
1.000000000000000000e+00 3.395230769230767010e+02 1.024130554199218750e+02 5.230316162109375000e+00 0.000000000000000000e+00 2.294117689132690430e+00 6.677546977996826172e+00
1.000000000000000000e+00 3.273230769230768260e+02 8.609085845947265625e+01 5.153656005859375000e+00 0.000000000000000000e+00 2.235294103622436523e+00 1.100003242492675781e+01
1.000000000000000000e+00 3.106999999999998749e+02 7.153415679931640625e+01 5.062530517578125000e+00 0.000000000000000000e+00 2.058823585510253906e+00 1.301812934875488281e+01
0.000000000000000000e+00 2.926769230769231172e+02 6.883816528320312500e+01 4.928100585937500000e+00 0.000000000000000000e+00 8.235294222831726074e-01 1.114481639862060547e+01
1.000000000000000000e+00 2.820000000000001137e+02 7.155585479736328125e+01 4.793670654296875000e+00 0.000000000000000000e+00 1.352941155433654785e+00 3.199220466613769531e+01
1.000000000000000000e+00 2.789538461538460865e+02 7.587860870361328125e+01 4.659210205078125000e+00 0.000000000000000000e+00 2.117647171020507812e+00 2.151124763488769531e+01
2.000000000000000000e+00 2.855307692307692946e+02 7.850928497314453125e+01 4.522766113281250000e+00 0.000000000000000000e+00 1.823529362678527832e+00 3.546777343750000000e+01
0.000000000000000000e+00 2.966461538461538225e+02 8.531337738037109375e+01 4.245880126953125000e+00 0.000000000000000000e+00 2.470588207244873047e+00 9.765464782714843750e+01
0.000000000000000000e+00 2.974153846153845961e+02 9.092899322509765625e+01 4.107421875000000000e+00 0.000000000000000000e+00 2.647058725357055664e+00 1.476154479980468750e+02
1.000000000000000000e+00 3.024153846153845961e+02 1.000651550292968750e+02 3.950256347656250000e+00 0.000000000000000000e+00 1.882352948188781738e+00 2.235674896240234375e+02
1.000000000000000000e+00 3.051000000000000796e+02 1.105177536010742188e+02 3.786834716796875000e+00 0.000000000000000000e+00 2.411764621734619141e+00 1.815377655029296875e+02
1.000000000000000000e+00 3.110999999999999659e+02 1.170961227416992188e+02 3.623443603515625000e+00 0.000000000000000000e+00 3.058823585510253906e+00 2.139141387939453125e+02
1.000000000000000000e+00 3.201846153846153697e+02 1.246258087158203125e+02 3.298400878906250000e+00 0.000000000000000000e+00 2.823529481887817383e+00 2.893678894042968750e+02
4.000000000000000000e+00 3.221384615384615699e+02 1.274948883056640625e+02 3.136779785156250000e+00 0.000000000000000000e+00 2.000000000000000000e+00 2.218945312500000000e+02
1.000000000000000000e+00 3.171846153846154266e+02 1.261787109375000000e+02 2.975128173828125000e+00 0.000000000000000000e+00 2.470588207244873047e+00 3.391576232910156250e+02
0.000000000000000000e+00 2.946692307692306940e+02 1.219766159057617188e+02 2.758148193359375000e+00 0.000000000000000000e+00 2.294117689132690430e+00 3.055620117187500000e+02
0.000000000000000000e+00 2.834000000000000341e+02 1.182459640502929688e+02 2.681518554687500000e+00 0.000000000000000000e+00 2.823529481887817383e+00 2.965870666503906250e+02
0.000000000000000000e+00 2.563923076923076678e+02 8.526895904541015625e+01 2.585449218750000000e+00 0.000000000000000000e+00 1.823529362678527832e+00 2.472017059326171875e+02
1.000000000000000000e+00 2.337076923076922981e+02 7.791610717773437500e+01 2.660858154296875000e+00 0.000000000000000000e+00 1.647058844566345215e+00 2.428709869384765625e+02
0.000000000000000000e+00 2.296153846153846132e+02 7.486389160156250000e+01 2.698547363281250000e+00 0.000000000000000000e+00 1.823529362678527832e+00 2.400000305175781250e+02
1.000000000000000000e+00 2.206461538461538510e+02 7.177317047119140625e+01 2.799316406250000000e+00 0.000000000000000000e+00 2.000000000000000000e+00 2.223447875976562500e+02
1.000000000000000000e+00 2.155615384615384755e+02 6.736401367187500000e+01 2.921142578125000000e+00 0.000000000000000000e+00 1.470588207244873047e+00 1.524803771972656250e+02
0.000000000000000000e+00 2.147615384615384926e+02 5.933342361450195312e+01 3.042938232421875000e+00 0.000000000000000000e+00 1.529411792755126953e+00 1.872868499755859375e+02
1.000000000000000000e+00 2.080538461538461661e+02 5.605990219116210938e+01 3.164733886718750000e+00 0.000000000000000000e+00 1.411764740943908691e+00 1.219822235107421875e+02
0.000000000000000000e+00 2.074461538461538339e+02 5.640129470825195312e+01 3.267700195312500000e+00 0.000000000000000000e+00 2.411764621734619141e+00 9.936236572265625000e+01
0.000000000000000000e+00 2.047615384615384642e+02 5.857734298706054688e+01 3.370697021484375000e+00 0.000000000000000000e+00 2.529411792755126953e+00 1.502098846435546875e+02
0.000000000000000000e+00 2.050538461538462229e+02 5.927283859252929688e+01 3.473663330078125000e+00 0.000000000000000000e+00 1.294117689132690430e+00 1.470150146484375000e+02
0.000000000000000000e+00 2.112999999999999261e+02 5.874757766723632812e+01 3.537017822265625000e+00 0.000000000000000000e+00 1.823529362678527832e+00 2.188484954833984375e+02
1.000000000000000000e+00 2.133307692307692207e+02 6.964251708984375000e+01 3.481567382812500000e+00 0.000000000000000000e+00 1.588235259056091309e+00 2.219410247802734375e+02
0.000000000000000000e+00 2.274615384615384244e+02 8.894947052001953125e+01 3.249877929687500000e+00 0.000000000000000000e+00 1.647058844566345215e+00 3.264411315917968750e+02
0.000000000000000000e+00 2.318307692307692776e+02 8.578760528564453125e+01 3.063720703125000000e+00 0.000000000000000000e+00 1.882352948188781738e+00 3.265113220214843750e+02
1.000000000000000000e+00 2.909769230769231854e+02 1.056282043457031250e+02 1.822204589843750000e+00 0.000000000000000000e+00 2.176470518112182617e+00 3.931163330078125000e+02
0.000000000000000000e+00 3.068230769230770534e+02 1.097247161865234375e+02 1.604400634765625000e+00 0.000000000000000000e+00 2.529411792755126953e+00 4.050573425292968750e+02
2.000000000000000000e+00 2.854384615384615245e+02 9.706372070312500000e+01 3.752441406250000000e-01 0.000000000000000000e+00 1.647058844566345215e+00 6.101552734375000000e+02
1.000000000000000000e+00 2.844615384615385096e+02 7.857026672363281250e+01 2.331542968750000000e-01 0.000000000000000000e+00 1.000000000000000000e+00 6.118051757812500000e+02
1.000000000000000000e+00 2.634384615384616382e+02 7.034531402587890625e+01 1.621093750000000000e-01 0.000000000000000000e+00 1.294117689132690430e+00 4.230213012695312500e+02
0.000000000000000000e+00 2.715153846153846189e+02 7.460504913330078125e+01 3.265075683593750000e-01 0.000000000000000000e+00 1.823529362678527832e+00 2.539526367187500000e+02
0.000000000000000000e+00 2.868384615384616723e+02 9.381362152099609375e+01 4.533996582031250000e-01 0.000000000000000000e+00 1.588235259056091309e+00 2.428670959472656250e+02
2.000000000000000000e+00 3.065538461538461092e+02 1.079913558959960938e+02 5.802612304687500000e-01 0.000000000000000000e+00 6.470588445663452148e-01 3.380545349121093750e+02
0.000000000000000000e+00 3.298769230769231058e+02 1.133539123535156250e+02 7.071228027343750000e-01 0.000000000000000000e+00 5.882352963089942932e-02 2.329769592285156250e+02
3.000000000000000000e+00 3.609846153846153243e+02 1.241617202758789062e+02 7.582702636718750000e-01 0.000000000000000000e+00 1.058823585510253906e+00 2.693361206054687500e+02
5.600000000000000000e+01 4.827769230769230262e+02 2.001843566894531250e+02 -2.625427246093750000e-01 0.000000000000000000e+00 1.764705896377563477e+00 5.601923828125000000e+02
5.000000000000000000e+00 5.594923076923075769e+02 1.970493011474609375e+02 -2.689331054687500000e+00 5.554957389831542969e-01 0.000000000000000000e+00 1.784354614257812500e+03
4.200000000000000000e+01 5.343000000000000682e+02 1.863927459716796875e+02 -3.742675781250000000e+00 3.916903436183929443e-01 5.882352963089942932e-02 1.598643920898437500e+03
5.600000000000000000e+01 5.223923076923076678e+02 1.851511840820312500e+02 -4.877502441406250000e+00 1.404767334461212158e-01 0.000000000000000000e+00 1.555259887695312500e+03
2.100000000000000000e+01 4.760692307692306144e+02 1.980630493164062500e+02 -7.147155761718750000e+00 3.292347192764282227e-01 0.000000000000000000e+00 1.904590576171875000e+03
1.100000000000000000e+01 4.492230769230769738e+02 1.774491577148437500e+02 -8.131134033203125000e+00 3.825060427188873291e-01 5.882352963089942932e-02 1.643565673828125000e+03
4.000000000000000000e+00 4.301384615384614563e+02 9.614474487304687500e+01 -1.009909057617187500e+01 5.081699490547180176e-01 2.352941185235977173e-01 1.800085083007812500e+03
1.000000000000000000e+00 3.233923076923076678e+02 7.427360534667968750e+01 -3.327789306640625000e+00 9.999999776482582092e-03 5.882353186607360840e-01 8.451375122070312500e+02
1.000000000000000000e+00 3.127846153846153925e+02 7.216041564941406250e+01 -3.200836181640625000e+00 9.999999776482582092e-03 0.000000000000000000e+00 9.137860717773437500e+02
2.000000000000000000e+00 2.936076923076922753e+02 6.171428298950195312e+01 -3.073913574218750000e+00 1.173233911395072937e-01 2.941176593303680420e-01 1.120840454101562500e+03
2.600000000000000000e+01 2.949153846153844256e+02 4.820141220092773438e+01 -2.946990966796875000e+00 1.010051071643829346e-01 5.294117927551269531e-01 1.172561035156250000e+03
8.000000000000000000e+00 3.283461538461539249e+02 3.817126464843750000e+01 -3.075775146484375000e+00 7.348976731300354004e-01 1.882352948188781738e+00 1.885563476562500000e+03
6.000000000000000000e+00 3.554076923076923435e+02 1.294553527832031250e+02 -8.080963134765625000e+00 7.160409092903137207e-01 2.352941185235977173e-01 1.998361083984375000e+03
3.300000000000000000e+01 4.049538461538460297e+02 1.290044555664062500e+02 -7.903045654296875000e+00 7.004255652427673340e-01 5.882352963089942932e-02 1.724268554687500000e+03
3.600000000000000000e+01 5.055538461538462798e+02 1.397109222412109375e+02 -6.246643066406250000e+00 3.937230408191680908e-01 0.000000000000000000e+00 1.497812622070312500e+03
3.000000000000000000e+01 5.767692307692306031e+02 1.500259704589843750e+02 -5.418457031250000000e+00 1.875744611024856567e-01 5.882353186607360840e-01 1.470627563476562500e+03
4.300000000000000000e+01 6.531153846153846416e+02 1.663331451416015625e+02 -4.651794433593750000e+00 4.991805851459503174e-01 8.823529481887817383e-01 1.605010742187500000e+03
2.300000000000000000e+01 6.570153846153845052e+02 1.727270050048828125e+02 -4.069732666015625000e+00 1.375535577535629272e-01 1.000000000000000000e+00 1.156281005859375000e+03
6.600000000000000000e+01 6.256769230769230035e+02 1.755696868896484375e+02 -3.487670898437500000e+00 2.892604768276214600e-01 1.176470592617988586e-01 1.266083374023437500e+03
5.000000000000000000e+00 5.111999999999998749e+02 1.634079437255859375e+02 -2.679290771484375000e+00 2.290734797716140747e-01 1.764705896377563477e+00 1.134926391601562500e+03
2.900000000000000000e+01 4.433846153846153584e+02 1.581668701171875000e+02 -2.808746337890625000e+00 1.564346551895141602e-01 1.882352948188781738e+00 1.004894531250000000e+03
6.000000000000000000e+00 3.832384615384614790e+02 1.536493377685546875e+02 -2.938201904296875000e+00 0.000000000000000000e+00 2.117647171020507812e+00 7.126439208984375000e+02
6.000000000000000000e+00 3.632230769230769170e+02 1.141477508544921875e+02 -3.502838134765625000e+00 9.999999776482582092e-03 6.470588445663452148e-01 8.488868408203125000e+02
6.200000000000000000e+01 3.878307692307691923e+02 1.074099807739257812e+02 -4.039916992187500000e+00 1.716171801090240479e-01 5.882353186607360840e-01 1.089145019531250000e+03
3.500000000000000000e+01 3.841307692307690900e+02 1.295337219238281250e+02 -4.576995849609375000e+00 1.570272892713546753e-01 1.117647051811218262e+00 1.044261352539062500e+03
4.000000000000000000e+01 3.871846153846153697e+02 1.577545623779296875e+02 -5.114074707031250000e+00 9.999999776482582092e-03 3.529411852359771729e-01 9.339588012695312500e+02
6.300000000000000000e+01 3.971769230769231172e+02 1.654479675292968750e+02 -5.330688476562500000e+00 3.331739008426666260e-01 1.058823585510253906e+00 1.387088378906250000e+03
4.400000000000000000e+01 3.955076923076927073e+02 1.582626800537109375e+02 -5.547302246093750000e+00 3.563883900642395020e-01 0.000000000000000000e+00 1.242942382812500000e+03
1.200000000000000000e+01 3.938923076923075541e+02 1.614297180175781250e+02 -5.841796875000000000e+00 3.354838788509368896e-01 2.941176593303680420e-01 1.116142578125000000e+03
5.600000000000000000e+01 3.782538461538460410e+02 1.560573120117187500e+02 -5.503601074218750000e+00 3.539665937423706055e-01 5.882353186607360840e-01 1.284374633789062500e+03
5.200000000000000000e+01 3.596692307692306940e+02 1.366653137207031250e+02 -5.165405273437500000e+00 4.488808214664459229e-01 1.058823585510253906e+00 1.593906860351562500e+03
4.900000000000000000e+01 3.426000000000001364e+02 1.186313705444335938e+02 -4.827178955078125000e+00 6.083596944808959961e-01 5.882353186607360840e-01 1.411474853515625000e+03
8.000000000000000000e+00 3.110692307692310123e+02 1.139991531372070312e+02 -4.368499755859375000e+00 2.719208002090454102e-01 1.176470637321472168e+00 1.200915649414062500e+03
7.000000000000000000e+00 2.817307692307692264e+02 1.022933273315429688e+02 -2.631103515625000000e+00 1.267765760421752930e-01 1.823529362678527832e+00 8.864410400390625000e+02
8.000000000000000000e+00 2.655461538461537998e+02 1.001765670776367188e+02 -2.333923339843750000e+00 9.999999776482582092e-03 1.647058844566345215e+00 7.487113037109375000e+02
2.000000000000000000e+00 2.661461538461539362e+02 1.035179672241210938e+02 -1.927551269531250000e+00 9.999999776482582092e-03 0.000000000000000000e+00 6.596975708007812500e+02
5.000000000000000000e+00 2.703538461538460638e+02 1.080544662475585938e+02 -1.993621826171875000e+00 1.658510863780975342e-01 1.823529362678527832e+00 9.496002197265625000e+02
2.000000000000000000e+00 2.892076923076923549e+02 1.254318847656250000e+02 -2.262878417968750000e+00 1.009324863553047180e-01 2.176470518112182617e+00 6.973150024414062500e+02
6.000000000000000000e+00 3.251769230769231740e+02 9.668793487548828125e+01 -3.298370361328125000e+00 1.363474577665328979e-01 3.058823585510253906e+00 7.644033203125000000e+02
1.000000000000000000e+00 3.485076923076921958e+02 1.038510971069335938e+02 -4.201202392578125000e+00 1.041206419467926025e-01 1.411764740943908691e+00 5.703580932617187500e+02
8.000000000000000000e+00 3.978153846153846871e+02 1.580286865234375000e+02 -4.489990234375000000e+00 2.276791632175445557e-01 1.000000000000000000e+00 7.386738281250000000e+02
3.800000000000000000e+01 4.237153846153846075e+02 1.766758117675781250e+02 -4.532043457031250000e+00 4.606032967567443848e-01 0.000000000000000000e+00 8.593809814453125000e+02
5.300000000000000000e+01 4.531307692307691468e+02 1.810056610107421875e+02 -4.574096679687500000e+00 5.429489016532897949e-01 5.882352963089942932e-02 9.764853515625000000e+02
4.900000000000000000e+01 4.646000000000001364e+02 1.813012695312500000e+02 -4.358062744140625000e+00 2.783548235893249512e-01 0.000000000000000000e+00 7.652266235351562500e+02
5.700000000000000000e+01 4.691769230769232308e+02 1.886997528076171875e+02 -4.056030273437500000e+00 3.299607336521148682e-01 5.294117927551269531e-01 8.202119140625000000e+02
4.900000000000000000e+01 4.768692307692308532e+02 1.966648406982421875e+02 -3.753997802734375000e+00 3.288129866123199463e-01 2.941176593303680420e-01 6.886178588867187500e+02
3.200000000000000000e+01 4.840076923076921389e+02 1.973612365722656250e+02 -3.451965332031250000e+00 1.861265301704406738e-01 5.294117927551269531e-01 5.566898193359375000e+02
1.100000000000000000e+01 4.663076923076922640e+02 1.978618011474609375e+02 -2.818206787109375000e+00 9.999999776482582092e-03 1.000000000000000000e+00 3.649181213378906250e+02
3.800000000000000000e+01 4.614846153846153811e+02 2.055356750488281250e+02 -2.501312255859375000e+00 9.999999776482582092e-03 1.529411792755126953e+00 3.203098754882812500e+02
3.300000000000000000e+01 4.691153846153848122e+02 2.126202850341796875e+02 -2.242645263671875000e+00 1.060778573155403137e-01 2.235294103622436523e+00 4.947650146484375000e+02
3.100000000000000000e+01 5.031000000000002501e+02 2.228811187744140625e+02 -2.158569335937500000e+00 1.391417831182479858e-01 2.294117689132690430e+00 5.090593566894531250e+02
4.200000000000000000e+01 5.110769230769227534e+02 2.256075286865234375e+02 -2.074493408203125000e+00 1.577079892158508301e-01 1.470588207244873047e+00 5.123468017578125000e+02
3.500000000000000000e+01 5.222615384615384073e+02 2.220776062011718750e+02 -1.990447998046875000e+00 0.000000000000000000e+00 5.882353186607360840e-01 2.185987396240234375e+02
7.000000000000000000e+00 5.427769230769229125e+02 2.263594818115234375e+02 -2.085296630859375000e+00 0.000000000000000000e+00 3.294117689132690430e+00 1.322566070556640625e+02
1.000000000000000000e+01 5.964538461538461434e+02 2.327453613281250000e+02 -2.632873535156250000e+00 9.999999776482582092e-03 3.529411792755126953e+00 2.274644012451171875e+02
2.600000000000000000e+01 6.201769230769230035e+02 2.448742370605468750e+02 -2.906646728515625000e+00 9.999999776482582092e-03 2.176470518112182617e+00 2.326413116455078125e+02
2.400000000000000000e+01 6.087076923076921275e+02 2.117483520507812500e+02 -3.228668212890625000e+00 9.999999776482582092e-03 1.588235259056091309e+00 2.794729309082031250e+02
4.500000000000000000e+01 6.288999999999999773e+02 1.351912841796875000e+02 -3.904815673828125000e+00 9.999999776482582092e-03 1.470588207244873047e+00 2.940028686523437500e+02
4.800000000000000000e+01 6.313076923076924913e+02 1.053103790283203125e+02 -4.242889404296875000e+00 2.969577014446258545e-01 5.882353186607360840e-01 4.539077148437500000e+02
6.800000000000000000e+01 6.359076923076928551e+02 9.864077758789062500e+01 -4.479278564453125000e+00 2.400152683258056641e-01 5.882352963089942932e-02 4.520592651367187500e+02
3.400000000000000000e+01 6.562461538461537884e+02 1.160022430419921875e+02 -4.715637207031250000e+00 1.804496198892593384e-01 5.882352963089942932e-02 4.453389892578125000e+02
3.500000000000000000e+01 6.558615384615386574e+02 1.588052825927734375e+02 -4.952026367187500000e+00 2.861317098140716553e-01 2.941176593303680420e-01 7.196923217773437500e+02
5.800000000000000000e+01 6.701384615384615699e+02 2.200478210449218750e+02 -5.162231445312500000e+00 2.732892930507659912e-01 2.941176593303680420e-01 6.719083251953125000e+02
2.500000000000000000e+01 6.795230769230770420e+02 2.766502075195312500e+02 -5.294006347656250000e+00 5.144358277320861816e-01 5.882352963089942932e-02 6.998667602539062500e+02
5.300000000000000000e+01 6.658846153846151310e+02 2.770267333984375000e+02 -5.521881103515625000e+00 3.062877953052520752e-01 5.882353186607360840e-01 5.830982666015625000e+02
6.500000000000000000e+01 6.533307692307694197e+02 2.303590393066406250e+02 -5.318878173828125000e+00 4.682733118534088135e-01 1.176470592617988586e-01 8.083577880859375000e+02
1.000000000000000000e+01 6.352923076923076451e+02 1.740068664550781250e+02 -5.115875244140625000e+00 1.516114771366119385e-01 1.352941155433654785e+00 5.940624389648437500e+02
4.600000000000000000e+01 6.294923076923072358e+02 1.356902160644531250e+02 -4.912872314453125000e+00 0.000000000000000000e+00 1.470588207244873047e+00 4.321461868286132812e+01
3.300000000000000000e+01 6.858538461538462343e+02 1.277357406616210938e+02 -4.251403808593750000e+00 9.999999776482582092e-03 3.529411852359771729e-01 3.316464538574218750e+02
6.000000000000000000e+01 7.281923076923079634e+02 1.632867736816406250e+02 -3.902404785156250000e+00 4.825138151645660400e-01 3.529411852359771729e-01 6.880919189453125000e+02
2.100000000000000000e+01 7.604846153846156085e+02 2.106778259277343750e+02 -3.553436279296875000e+00 1.294784247875213623e-01 2.941176593303680420e-01 4.907494506835937500e+02
1.400000000000000000e+01 7.693692307692308532e+02 2.669781799316406250e+02 -3.095245361328125000e+00 6.089280843734741211e-01 1.176470592617988586e-01 8.864255371093750000e+02
5.000000000000000000e+01 7.421076923076921048e+02 2.711817626953125000e+02 -2.637023925781250000e+00 4.000960886478424072e-01 0.000000000000000000e+00 8.686323242187500000e+02
4.100000000000000000e+01 7.142846153846154493e+02 2.791809997558593750e+02 -2.178833007812500000e+00 9.999999776482582092e-03 1.176470592617988586e-01 4.415893554687500000e+02
5.600000000000000000e+01 7.638999999999995225e+02 3.104703674316406250e+02 -5.968933105468750000e-01 9.999999776482582092e-03 2.941176593303680420e-01 3.422776184082031250e+02
1.100000000000000000e+01 7.794307692307689877e+02 3.121722412109375000e+02 -3.604125976562500000e-01 0.000000000000000000e+00 5.882353186607360840e-01 1.462979736328125000e+02
2.400000000000000000e+01 8.129461538461536065e+02 3.232633666992187500e+02 -2.684631347656250000e-01 2.551532089710235596e-01 1.176470592617988586e-01 6.789521484375000000e+02
1.500000000000000000e+01 8.219153846153847098e+02 3.274078369140625000e+02 -1.765136718750000000e-01 0.000000000000000000e+00 7.647058963775634766e-01 7.750632476806640625e+01
7.300000000000000000e+01 2.870369230769229489e+03 4.685907897949218750e+02 6.150512695312500000e+00 0.000000000000000000e+00 0.000000000000000000e+00 2.432498931884765625e+02
7.400000000000000000e+01 2.640715384615384664e+03 4.438194885253906250e+02 5.297119140625000000e+00 0.000000000000000000e+00 0.000000000000000000e+00 9.570910644531250000e+02
5.200000000000000000e+01 2.327615384615382482e+03 3.187102966308593750e+02 4.443695068359375000e+00 0.000000000000000000e+00 2.352941185235977173e-01 3.028094177246093750e+02
1.000000000000000000e+01 1.470930769230769329e+03 1.836962890625000000e+02 6.833496093750000000e-01 0.000000000000000000e+00 0.000000000000000000e+00 9.905062866210937500e+02
3.200000000000000000e+01 1.527446153846153720e+03 5.260561523437500000e+02 -6.083679199218750000e-01 9.999999776482582092e-03 0.000000000000000000e+00 1.764387329101562500e+03
6.900000000000000000e+01 1.365423076923077588e+03 4.545541381835937500e+02 -6.102600097656250000e-01 0.000000000000000000e+00 5.294117927551269531e-01 1.657941040039062500e+03
1.100000000000000000e+01 1.183300000000000182e+03 3.580725708007812500e+02 -6.121826171875000000e-01 9.999999776482582092e-03 0.000000000000000000e+00 1.736146972656250000e+03
1.100000000000000000e+01 8.526692307692309214e+02 1.955203704833984375e+02 -6.824951171875000000e-01 9.999999776482582092e-03 7.647058963775634766e-01 1.563198242187500000e+03
3.100000000000000000e+01 4.935076923076919684e+02 1.903373870849609375e+02 -9.580993652343750000e-01 0.000000000000000000e+00 1.000000000000000000e+00 1.152114257812500000e+03
5.700000000000000000e+01 4.077384615384614222e+02 1.600885925292968750e+02 -1.233703613281250000e+00 0.000000000000000000e+00 0.000000000000000000e+00 1.383616088867187500e+03
5.100000000000000000e+01 4.023923076923076678e+02 9.573136138916015625e+01 -1.509338378906250000e+00 0.000000000000000000e+00 0.000000000000000000e+00 1.267306762695312500e+03
6.600000000000000000e+01 5.856538461538465299e+02 1.213736877441406250e+02 -1.789703369140625000e+00 9.999999776482582092e-03 0.000000000000000000e+00 1.507128662109375000e+03
1.200000000000000000e+01 4.914384615384614108e+02 1.720090026855468750e+02 -2.074859619140625000e+00 0.000000000000000000e+00 5.294117927551269531e-01 4.548609008789062500e+02
5.500000000000000000e+01 7.797769230769234809e+02 2.534839172363281250e+02 -2.359985351562500000e+00 0.000000000000000000e+00 3.529411852359771729e-01 9.100161743164062500e+02
3.000000000000000000e+01 1.172892307692307213e+03 3.423712158203125000e+02 -2.645141601562500000e+00 9.999999776482582092e-03 2.352941185235977173e-01 1.913094116210937500e+03
7.800000000000000000e+01 1.201153846153846189e+03 4.108363647460937500e+02 -2.782409667968750000e+00 0.000000000000000000e+00 5.882353186607360840e-01 8.480570678710937500e+02
3.400000000000000000e+01 5.995846153846151765e+02 1.885185241699218750e+02 -2.497894287109375000e+00 0.000000000000000000e+00 0.000000000000000000e+00 1.626828979492187500e+03
5.100000000000000000e+01 7.331615384615384983e+02 2.028812255859375000e+02 -1.949401855468750000e+00 9.999999776482582092e-03 3.529411852359771729e-01 1.581397583007812500e+03
6.000000000000000000e+00 3.870307692307694651e+02 1.677061157226562500e+02 -3.101501464843750000e-01 0.000000000000000000e+00 0.000000000000000000e+00 1.070752929687500000e+03
1.000000000000000000e+00 3.458384615384616723e+02 1.472228088378906250e+02 2.333984375000000000e-01 0.000000000000000000e+00 0.000000000000000000e+00 9.763724975585937500e+02
0.000000000000000000e+00 3.328153846153846303e+02 1.284307403564453125e+02 7.769470214843750000e-01 0.000000000000000000e+00 0.000000000000000000e+00 8.917919311523437500e+02
4.000000000000000000e+00 3.021846153846153129e+02 1.133963470458984375e+02 1.262756347656250000e+00 0.000000000000000000e+00 2.352941185235977173e-01 7.724171142578125000e+02
2.000000000000000000e+00 2.855307692307691809e+02 8.664639282226562500e+01 2.118896484375000000e+00 0.000000000000000000e+00 2.352941185235977173e-01 7.539991455078125000e+02
0.000000000000000000e+00 2.888538461538463480e+02 8.677919006347656250e+01 2.546966552734375000e+00 0.000000000000000000e+00 1.588235259056091309e+00 7.151439819335937500e+02
1.000000000000000000e+00 2.987461538461538453e+02 1.026039962768554688e+02 2.732330322265625000e+00 0.000000000000000000e+00 5.294117927551269531e-01 7.912818603515625000e+02
1.000000000000000000e+00 3.230999999999998522e+02 1.152251739501953125e+02 2.836761474609375000e+00 0.000000000000000000e+00 0.000000000000000000e+00 7.541359252929687500e+02
4.000000000000000000e+00 3.402846153846156767e+02 1.234387435913085938e+02 2.941223144531250000e+00 0.000000000000000000e+00 5.882352963089942932e-02 7.150734863281250000e+02
4.000000000000000000e+00 3.160153846153846757e+02 1.243315582275390625e+02 2.825256347656250000e+00 0.000000000000000000e+00 0.000000000000000000e+00 7.530700683593750000e+02
5.000000000000000000e+00 3.318692307692307395e+02 1.168805236816406250e+02 2.384399414062500000e+00 0.000000000000000000e+00 0.000000000000000000e+00 7.526983032226562500e+02
5.000000000000000000e+00 3.369769230769229011e+02 1.250553741455078125e+02 2.137145996093750000e+00 0.000000000000000000e+00 0.000000000000000000e+00 7.228624877929687500e+02
3.000000000000000000e+00 5.000538461538461661e+02 2.344466247558593750e+02 6.040649414062500000e-01 0.000000000000000000e+00 2.117647171020507812e+00 5.795292358398437500e+02
5.000000000000000000e+00 5.178076923076923777e+02 2.550795898437500000e+02 7.048950195312500000e-01 0.000000000000000000e+00 1.000000000000000000e+00 5.362920532226562500e+02
7.000000000000000000e+00 5.623384615384616154e+02 2.599826660156250000e+02 7.152709960937500000e-01 0.000000000000000000e+00 1.352941155433654785e+00 2.693195800781250000e+02
5.100000000000000000e+01 5.888461538461536975e+02 2.210023803710937500e+02 1.934204101562500000e-01 0.000000000000000000e+00 1.882352948188781738e+00 2.620137329101562500e+02
3.400000000000000000e+01 5.690769230769235492e+02 2.288874664306640625e+02 3.683471679687500000e-02 0.000000000000000000e+00 0.000000000000000000e+00 2.873534240722656250e+02
3.600000000000000000e+01 7.404000000000006594e+02 3.265913696289062500e+02 -7.033386230468750000e-01 0.000000000000000000e+00 0.000000000000000000e+00 3.518890686035156250e+02
5.400000000000000000e+01 7.738538461538462343e+02 3.293529052734375000e+02 -7.624816894531250000e-01 0.000000000000000000e+00 0.000000000000000000e+00 3.879830017089843750e+02
4.100000000000000000e+01 8.297769230769231399e+02 3.369236450195312500e+02 -8.770446777343750000e-01 0.000000000000000000e+00 0.000000000000000000e+00 4.014730224609375000e+02
6.800000000000000000e+01 8.326769230769234582e+02 3.188727111816406250e+02 -8.385314941406250000e-01 0.000000000000000000e+00 0.000000000000000000e+00 4.446458435058593750e+02
6.300000000000000000e+01 8.125999999999999091e+02 2.139142913818359375e+02 -7.849121093750000000e-01 0.000000000000000000e+00 2.352941185235977173e-01 4.269435424804687500e+02
4.400000000000000000e+01 7.731000000000002501e+02 1.689759216308593750e+02 -8.013305664062500000e-01 9.999999776482582092e-03 5.882353186607360840e-01 2.814938964843750000e+02
5.900000000000000000e+01 7.747076923076922412e+02 1.984988861083984375e+02 -8.095397949218750000e-01 9.999999776482582092e-03 5.882352963089942932e-02 2.978011779785156250e+02
5.800000000000000000e+01 7.443615384615386574e+02 3.152857360839843750e+02 -9.557189941406250000e-01 9.999999776482582092e-03 0.000000000000000000e+00 3.257294311523437500e+02
5.200000000000000000e+01 7.380692307692311260e+02 3.138789978027343750e+02 -1.038055419921875000e+00 9.999999776482582092e-03 0.000000000000000000e+00 3.208587646484375000e+02
4.500000000000000000e+01 7.242769230769233673e+02 3.187463989257812500e+02 -1.120422363281250000e+00 9.999999776482582092e-03 0.000000000000000000e+00 2.951089477539062500e+02
6.800000000000000000e+01 7.219846153846149264e+02 3.305795593261718750e+02 -1.235992431640625000e+00 0.000000000000000000e+00 0.000000000000000000e+00 2.240104522705078125e+02
6.700000000000000000e+01 7.077153846153844370e+02 3.464716796875000000e+02 -1.351593017578125000e+00 0.000000000000000000e+00 0.000000000000000000e+00 1.768047943115234375e+02
6.700000000000000000e+01 6.974384615384616382e+02 3.402603149414062500e+02 -1.467193603515625000e+00 0.000000000000000000e+00 0.000000000000000000e+00 1.425098724365234375e+02
1.500000000000000000e+01 7.010692307692310123e+02 3.284472656250000000e+02 -1.556182861328125000e+00 0.000000000000000000e+00 0.000000000000000000e+00 1.053403091430664062e+02
6.900000000000000000e+01 7.279230769230773603e+02 3.292270507812500000e+02 -1.565246582031250000e+00 0.000000000000000000e+00 0.000000000000000000e+00 1.735150604248046875e+02
5.800000000000000000e+01 7.406384615384615699e+02 3.559459838867187500e+02 -1.574340820312500000e+00 0.000000000000000000e+00 0.000000000000000000e+00 1.664856567382812500e+02
6.000000000000000000e+00 7.434999999999998863e+02 3.555944519042968750e+02 -1.581359863281250000e+00 0.000000000000000000e+00 0.000000000000000000e+00 1.001376342773437500e+02
4.000000000000000000e+01 7.427307692307692832e+02 3.507118835449218750e+02 -1.568054199218750000e+00 0.000000000000000000e+00 0.000000000000000000e+00 1.031742706298828125e+02
3.300000000000000000e+01 7.439461538461538339e+02 3.487973022460937500e+02 -1.554779052734375000e+00 9.999999776482582092e-03 0.000000000000000000e+00 1.849921569824218750e+02
5.700000000000000000e+01 7.369846153846153811e+02 3.408005065917968750e+02 -1.541503906250000000e+00 9.999999776482582092e-03 0.000000000000000000e+00 2.395321960449218750e+02
4.800000000000000000e+01 7.524307692307691013e+02 3.330863037109375000e+02 -1.609069824218750000e+00 9.999999776482582092e-03 0.000000000000000000e+00 2.690936279296875000e+02
2.500000000000000000e+01 7.565307692307693515e+02 3.400828247070312500e+02 -1.649566650390625000e+00 9.999999776482582092e-03 5.882352963089942932e-02 2.536848297119140625e+02
5.800000000000000000e+01 7.699230769230767919e+02 3.377655639648437500e+02 -1.690063476562500000e+00 9.999999776482582092e-03 6.470588445663452148e-01 2.777930603027343750e+02
4.200000000000000000e+01 7.836615384615383846e+02 3.385563659667968750e+02 -1.811859130859375000e+00 9.999999776482582092e-03 0.000000000000000000e+00 2.619602050781250000e+02
2.800000000000000000e+01 7.961461538461537657e+02 3.419795227050781250e+02 -1.933685302734375000e+00 9.999999776482582092e-03 0.000000000000000000e+00 2.560854492187500000e+02
4.100000000000000000e+01 8.124769230769229580e+02 3.426307373046875000e+02 -2.055480957031250000e+00 9.999999776482582092e-03 0.000000000000000000e+00 2.616852416992187500e+02
5.200000000000000000e+01 8.184384615384612971e+02 3.495429382324218750e+02 -2.313140869140625000e+00 9.999999776482582092e-03 1.000000000000000000e+00 3.295102233886718750e+02
2.300000000000000000e+01 8.455923076923082817e+02 3.669081115722656250e+02 -2.446166992187500000e+00 9.999999776482582092e-03 5.882353186607360840e-01 3.473002319335937500e+02
6.600000000000000000e+01 8.784538461538465981e+02 3.919082336425781250e+02 -2.685424804687500000e+00 9.999999776482582092e-03 2.941176593303680420e-01 3.796215209960937500e+02
2.400000000000000000e+01 8.836923076923077360e+02 4.043659973144531250e+02 -2.764801025390625000e+00 9.999999776482582092e-03 0.000000000000000000e+00 4.023025512695312500e+02
5.300000000000000000e+01 8.959307692307691013e+02 4.089368591308593750e+02 -2.844207763671875000e+00 1.030258163809776306e-01 2.941176593303680420e-01 4.420063781738281250e+02
5.400000000000000000e+01 9.149384615384623203e+02 3.496410217285156250e+02 -2.923614501953125000e+00 9.999999776482582092e-03 0.000000000000000000e+00 4.498727722167968750e+02
5.500000000000000000e+01 9.303538461538466890e+02 2.708765869140625000e+02 -2.922882080078125000e+00 1.045278161764144897e-01 6.470588445663452148e-01 4.514704284667968750e+02
6.900000000000000000e+01 1.003523076923077269e+03 1.851787567138671875e+02 -2.868072509765625000e+00 1.776345223188400269e-01 6.470588445663452148e-01 6.245886840820312500e+02
4.300000000000000000e+01 9.947769230769229125e+02 2.052573699951171875e+02 -2.775817871093750000e+00 1.329844295978546143e-01 2.941176593303680420e-01 5.385020141601562500e+02
6.000000000000000000e+01 1.028446153846153720e+03 2.439840240478515625e+02 -2.710998535156250000e+00 1.335572302341461182e-01 2.941176593303680420e-01 6.035090942382812500e+02
5.400000000000000000e+01 1.034361538461538430e+03 2.845397338867187500e+02 -2.646148681640625000e+00 9.999999776482582092e-03 0.000000000000000000e+00 5.490084228515625000e+02
6.400000000000000000e+01 1.107461538461538112e+03 3.147495422363281250e+02 -2.443847656250000000e+00 1.102127730846405029e-01 0.000000000000000000e+00 5.236289062500000000e+02
2.800000000000000000e+01 1.146507692307692651e+03 3.437530517578125000e+02 -2.320892333984375000e+00 9.999999776482582092e-03 2.941176593303680420e-01 4.812283325195312500e+02
5.700000000000000000e+01 1.199653846153845507e+03 4.036445312500000000e+02 -2.197967529296875000e+00 9.999999776482582092e-03 0.000000000000000000e+00 5.812657470703125000e+02
7.000000000000000000e+01 1.222584615384615972e+03 4.568514099121093750e+02 -2.011657714843750000e+00 9.999999776482582092e-03 0.000000000000000000e+00 4.546514892578125000e+02
6.100000000000000000e+01 1.154453846153846598e+03 4.629075927734375000e+02 -1.761962890625000000e+00 0.000000000000000000e+00 0.000000000000000000e+00 2.700395812988281250e+02
4.100000000000000000e+01 1.156430769230768419e+03 4.571671752929687500e+02 -1.512268066406250000e+00 0.000000000000000000e+00 0.000000000000000000e+00 7.432498168945312500e+01
1.600000000000000000e+01 1.017800000000000296e+03 4.329814758300781250e+02 6.867980957031250000e-01 0.000000000000000000e+00 0.000000000000000000e+00 4.814071655273437500e+01
1.800000000000000000e+01 9.762153846153850054e+02 4.469092712402343750e+02 9.670410156250000000e-01 0.000000000000000000e+00 0.000000000000000000e+00 3.923295211791992188e+01
5.800000000000000000e+01 1.081500000000000227e+03 4.391731567382812500e+02 1.555145263671875000e+00 0.000000000000000000e+00 0.000000000000000000e+00 2.671199645996093750e+02
5.500000000000000000e+01 1.094469230769230990e+03 4.202546081542968750e+02 1.576416015625000000e+00 0.000000000000000000e+00 0.000000000000000000e+00 3.764827270507812500e+02
1.600000000000000000e+01 1.022653846153846530e+03 3.826400756835937500e+02 8.347564697265625000e+00 0.000000000000000000e+00 0.000000000000000000e+00 2.494786376953125000e+02
7.000000000000000000e+00 8.472538461538463253e+02 3.314414978027343750e+02 7.942016601562500000e+00 0.000000000000000000e+00 0.000000000000000000e+00 1.256044921875000000e+02
1.800000000000000000e+01 8.273307692307687375e+02 3.404480285644531250e+02 7.761077880859375000e+00 0.000000000000000000e+00 0.000000000000000000e+00 2.589476623535156250e+02
1.500000000000000000e+01 7.944153846153845961e+02 3.303226318359375000e+02 7.601959228515625000e+00 0.000000000000000000e+00 0.000000000000000000e+00 3.174274902343750000e+02
6.100000000000000000e+01 7.001461538461539931e+02 3.561387329101562500e+02 7.018432617187500000e+00 0.000000000000000000e+00 0.000000000000000000e+00 4.238461608886718750e+02
2.400000000000000000e+01 6.599692307692309896e+02 3.396764831542968750e+02 6.889587402343750000e+00 0.000000000000000000e+00 0.000000000000000000e+00 5.834567871093750000e+02
1.000000000000000000e+01 6.371307692307693742e+02 2.609436035156250000e+02 6.521179199218750000e+00 0.000000000000000000e+00 0.000000000000000000e+00 4.863275451660156250e+02
1.300000000000000000e+01 6.527230769230772012e+02 2.625635070800781250e+02 6.356445312500000000e+00 0.000000000000000000e+00 0.000000000000000000e+00 3.118829345703125000e+02
3.300000000000000000e+01 9.148076923076926050e+02 4.364507751464843750e+02 6.107238769531250000e+00 0.000000000000000000e+00 0.000000000000000000e+00 1.068143188476562500e+03
6.700000000000000000e+01 7.917692307692309441e+02 3.397352294921875000e+02 6.023468017578125000e+00 0.000000000000000000e+00 4.705882370471954346e-01 5.335010375976562500e+02
1.800000000000000000e+01 7.314230769230766782e+02 2.700460815429687500e+02 5.939697265625000000e+00 0.000000000000000000e+00 2.941176593303680420e-01 2.782361755371093750e+02
2.000000000000000000e+00 6.209076923076920593e+02 2.669172363281250000e+02 5.864959716796875000e+00 0.000000000000000000e+00 2.941176593303680420e-01 1.461931915283203125e+02
4.000000000000000000e+00 6.427615384615385210e+02 2.590230712890625000e+02 5.834228515625000000e+00 0.000000000000000000e+00 0.000000000000000000e+00 2.131969757080078125e+02
6.400000000000000000e+01 6.689769230769229580e+02 2.707350769042968750e+02 5.803497314453125000e+00 0.000000000000000000e+00 0.000000000000000000e+00 2.587360534667968750e+02
2.200000000000000000e+01 6.670846153846157449e+02 2.948791198730468750e+02 5.407257080078125000e+00 0.000000000000000000e+00 0.000000000000000000e+00 2.667979125976562500e+02
4.500000000000000000e+01 6.023538461538462343e+02 2.825914611816406250e+02 5.353912353515625000e+00 0.000000000000000000e+00 0.000000000000000000e+00 1.989369354248046875e+02
1.400000000000000000e+01 6.154999999999998863e+02 2.730009155273437500e+02 5.739715576171875000e+00 0.000000000000000000e+00 8.235294222831726074e-01 1.820599670410156250e+02
1.400000000000000000e+01 6.377846153846156767e+02 2.761514892578125000e+02 5.732696533203125000e+00 0.000000000000000000e+00 9.411764740943908691e-01 1.606826019287109375e+02
4.100000000000000000e+01 6.303153846153844597e+02 2.765999145507812500e+02 5.725677490234375000e+00 0.000000000000000000e+00 8.823529481887817383e-01 1.503325347900390625e+02
2.600000000000000000e+01 6.100692307692307850e+02 2.751683654785156250e+02 5.493530273437500000e+00 0.000000000000000000e+00 0.000000000000000000e+00 9.835674285888671875e+01
1.400000000000000000e+01 6.115076923076921958e+02 2.725457763671875000e+02 5.041137695312500000e+00 0.000000000000000000e+00 1.882352948188781738e+00 1.286432037353515625e+02
5.300000000000000000e+01 5.778230769230769965e+02 2.488171997070312500e+02 4.613647460937500000e+00 0.000000000000000000e+00 2.529411792755126953e+00 1.297904663085937500e+02
1.000000000000000000e+00 4.393153846153844597e+02 1.817435302734375000e+02 4.360900878906250000e+00 0.000000000000000000e+00 2.470588207244873047e+00 1.547167205810546875e+02
3.000000000000000000e+00 3.839461538461537202e+02 1.648321838378906250e+02 4.790618896484375000e+00 0.000000000000000000e+00 2.235294103622436523e+00 5.248455047607421875e+01
1.000000000000000000e+00 3.807999999999998977e+02 1.365086364746093750e+02 5.004516601562500000e+00 0.000000000000000000e+00 1.647058844566345215e+00 8.171752929687500000e+01
2.000000000000000000e+00 3.739999999999999432e+02 1.179115066528320312e+02 4.873168945312500000e+00 0.000000000000000000e+00 2.411764621734619141e+00 2.736074256896972656e+01
1.000000000000000000e+00 3.652230769230768033e+02 1.020946121215820312e+02 4.807495117187500000e+00 0.000000000000000000e+00 1.705882310867309570e+00 2.149997329711914062e+01
4.000000000000000000e+00 3.486230769230770079e+02 9.176435852050781250e+01 4.726715087890625000e+00 0.000000000000000000e+00 3.117647171020507812e+00 2.031730461120605469e+01
0.000000000000000000e+00 3.308230769230768260e+02 8.922974395751953125e+01 4.600524902343750000e+00 0.000000000000000000e+00 1.588235259056091309e+00 2.282956314086914062e+01
0.000000000000000000e+00 3.218615384615386006e+02 9.140066528320312500e+01 4.348205566406250000e+00 0.000000000000000000e+00 2.470588207244873047e+00 4.698789978027343750e+01
0.000000000000000000e+00 3.236615384615384983e+02 8.942955017089843750e+01 4.206298828125000000e+00 0.000000000000000000e+00 2.411764621734619141e+00 1.165039901733398438e+02
1.000000000000000000e+00 3.214307692307692150e+02 8.888962554931640625e+01 4.048675537109375000e+00 0.000000000000000000e+00 3.058823585510253906e+00 8.377025604248046875e+01
1.000000000000000000e+00 3.250846153846152902e+02 9.081828308105468750e+01 3.891052246093750000e+00 0.000000000000000000e+00 2.411764621734619141e+00 1.543089294433593750e+02
1.000000000000000000e+00 3.246923076923077360e+02 1.000225448608398438e+02 3.733398437500000000e+00 0.000000000000000000e+00 2.705882310867309570e+00 1.705956878662109375e+02
0.000000000000000000e+00 3.214769230769229011e+02 1.174690093994140625e+02 3.553131103515625000e+00 0.000000000000000000e+00 2.000000000000000000e+00 1.085486373901367188e+02
1.000000000000000000e+00 2.965384615384613767e+02 1.325764465332031250e+02 2.272186279296875000e+00 0.000000000000000000e+00 2.411764621734619141e+00 2.730705566406250000e+02
1.000000000000000000e+00 2.885076923076924231e+02 1.161223297119140625e+02 2.211669921875000000e+00 0.000000000000000000e+00 2.000000000000000000e+00 3.278412170410156250e+02
1.000000000000000000e+00 2.472615384615384642e+02 8.629106903076171875e+01 2.386413574218750000e+00 0.000000000000000000e+00 2.117647171020507812e+00 2.501314086914062500e+02
1.000000000000000000e+00 2.389923076923076053e+02 8.003530883789062500e+01 2.495910644531250000e+00 0.000000000000000000e+00 2.588235378265380859e+00 2.500126647949218750e+02
1.000000000000000000e+00 2.362538461538462968e+02 7.546894073486328125e+01 2.622344970703125000e+00 0.000000000000000000e+00 1.529411792755126953e+00 2.446752471923828125e+02
0.000000000000000000e+00 2.353384615384615586e+02 6.645528411865234375e+01 2.748779296875000000e+00 0.000000000000000000e+00 2.000000000000000000e+00 2.274864044189453125e+02
0.000000000000000000e+00 2.331307692307692037e+02 6.353126525878906250e+01 2.875213623046875000e+00 0.000000000000000000e+00 2.176470518112182617e+00 2.172576751708984375e+02
0.000000000000000000e+00 2.273923076923077247e+02 6.112285614013671875e+01 2.974121093750000000e+00 0.000000000000000000e+00 1.823529362678527832e+00 1.668938140869140625e+02
1.000000000000000000e+00 2.233538461538462059e+02 6.501772308349609375e+01 3.073059082031250000e+00 0.000000000000000000e+00 2.470588207244873047e+00 1.183571929931640625e+02
0.000000000000000000e+00 2.241615384615384130e+02 6.750241851806640625e+01 3.171966552734375000e+00 0.000000000000000000e+00 2.529411792755126953e+00 1.523404998779296875e+02
1.000000000000000000e+00 2.331769230769230603e+02 9.036157226562500000e+01 3.079406738281250000e+00 0.000000000000000000e+00 2.705882310867309570e+00 3.148465270996093750e+02
1.000000000000000000e+00 2.350461538461538282e+02 9.346849060058593750e+01 2.970489501953125000e+00 0.000000000000000000e+00 2.235294103622436523e+00 2.918018188476562500e+02
1.000000000000000000e+00 2.414615384615383959e+02 9.575286102294921875e+01 2.803955078125000000e+00 0.000000000000000000e+00 2.000000000000000000e+00 3.239410400390625000e+02
0.000000000000000000e+00 3.304076923076924004e+02 1.340185241699218750e+02 1.209350585937500000e+00 0.000000000000000000e+00 2.294117689132690430e+00 4.993536987304687500e+02
1.000000000000000000e+00 3.378615384615386006e+02 1.369308013916015625e+02 1.042419433593750000e+00 0.000000000000000000e+00 2.647058725357055664e+00 5.642650756835937500e+02
1.000000000000000000e+00 3.301923076923075655e+02 1.345153656005859375e+02 9.164428710937500000e-01 0.000000000000000000e+00 2.882352828979492188e+00 4.262897338867187500e+02
0.000000000000000000e+00 3.158384615384615017e+02 1.262653656005859375e+02 7.904663085937500000e-01 0.000000000000000000e+00 1.705882310867309570e+00 4.374061279296875000e+02
1.000000000000000000e+00 3.026846153846155403e+02 1.141643753051757812e+02 6.644897460937500000e-01 0.000000000000000000e+00 1.941176414489746094e+00 4.648081359863281250e+02
1.000000000000000000e+00 2.620692307692307281e+02 7.497205352783203125e+01 4.402465820312500000e-01 0.000000000000000000e+00 1.941176414489746094e+00 3.317688598632812500e+02
0.000000000000000000e+00 2.560615384615384187e+02 5.892985153198242188e+01 5.383911132812500000e-01 0.000000000000000000e+00 1.882352948188781738e+00 2.714471740722656250e+02
2.000000000000000000e+00 2.680923076923078270e+02 6.800449371337890625e+01 6.636962890625000000e-01 0.000000000000000000e+00 1.529411792755126953e+00 1.818998870849609375e+02
2.100000000000000000e+01 2.863153846153846303e+02 9.019899749755859375e+01 7.709960937500000000e-01 0.000000000000000000e+00 3.529411852359771729e-01 1.953214569091796875e+02
2.000000000000000000e+01 3.079076923076923435e+02 1.143013839721679688e+02 8.782958984375000000e-01 0.000000000000000000e+00 5.882352963089942932e-02 2.394573211669921875e+02
1.000000000000000000e+00 3.416769230769229466e+02 1.232136459350585938e+02 9.855957031250000000e-01 0.000000000000000000e+00 1.470588207244873047e+00 3.675198364257812500e+02
2.000000000000000000e+00 3.729076923076921162e+02 1.379501800537109375e+02 1.018127441406250000e+00 0.000000000000000000e+00 1.647058844566345215e+00 3.625657043457031250e+02
4.000000000000000000e+00 5.216846153846151992e+02 2.214176330566406250e+02 4.425659179687500000e-01 0.000000000000000000e+00 1.352941155433654785e+00 5.787164306640625000e+02
5.600000000000000000e+01 5.425615384615385892e+02 2.396737976074218750e+02 -3.979492187500000000e-02 0.000000000000000000e+00 0.000000000000000000e+00 6.773535766601562500e+02
6.200000000000000000e+01 5.649307692307688740e+02 2.321279907226562500e+02 -8.127441406250000000e-01 0.000000000000000000e+00 0.000000000000000000e+00 7.276517944335937500e+02
5.300000000000000000e+01 5.788769230769231626e+02 2.155326995849609375e+02 -1.585662841796875000e+00 4.080756902694702148e-01 5.882352963089942932e-02 1.275847656250000000e+03
4.400000000000000000e+01 5.890692307692307850e+02 1.933453674316406250e+02 -2.358581542968750000e+00 4.308814406394958496e-01 0.000000000000000000e+00 1.399584228515625000e+03
4.500000000000000000e+01 5.775615384615382482e+02 1.798647003173828125e+02 -3.341461181640625000e+00 1.936034113168716431e-01 3.529411852359771729e-01 1.531652954101562500e+03
2.200000000000000000e+01 5.608538461538460069e+02 1.839193267822265625e+02 -4.394287109375000000e+00 3.192706406116485596e-01 6.470588445663452148e-01 1.707022216796875000e+03
4.600000000000000000e+01 5.261153846153847553e+02 1.834322357177734375e+02 -5.447143554687500000e+00 3.847309648990631104e-01 6.470588445663452148e-01 1.465595092773437500e+03
1.400000000000000000e+01 4.968615384615385437e+02 1.821315155029296875e+02 -6.499969482421875000e+00 1.030790209770202637e-01 3.529411852359771729e-01 1.202668334960937500e+03
3.200000000000000000e+01 4.895692307692307281e+02 1.784791870117187500e+02 -7.373779296875000000e+00 6.700493693351745605e-01 2.941176593303680420e-01 1.801716674804687500e+03
5.600000000000000000e+01 4.851538461538461320e+02 1.535251007080078125e+02 -8.247589111328125000e+00 2.762475609779357910e-01 0.000000000000000000e+00 1.622554321289062500e+03
5.100000000000000000e+01 4.359923076923077474e+02 1.199977416992187500e+02 -9.121398925781250000e+00 4.314635992050170898e-01 0.000000000000000000e+00 1.503905761718750000e+03
5.600000000000000000e+01 3.975538461538463366e+02 1.100695037841796875e+02 -9.779815673828125000e+00 5.950536131858825684e-01 1.176470592617988586e-01 1.670724853515625000e+03
3.400000000000000000e+01 3.072461538461539021e+02 8.286027526855468750e+01 -9.307708740234375000e+00 8.464636802673339844e-01 1.176470637321472168e+00 1.615994506835937500e+03
4.100000000000000000e+01 3.709615384615386802e+02 6.966567230224609375e+01 -7.246490478515625000e+00 5.625050663948059082e-01 7.647058963775634766e-01 1.755551513671875000e+03
6.000000000000000000e+00 4.177846153846153925e+02 6.990049743652343750e+01 -6.215881347656250000e+00 5.108225345611572266e-01 3.529411852359771729e-01 1.705265014648437500e+03
2.000000000000000000e+00 4.579153846153845393e+02 7.576826477050781250e+01 -4.660003662109375000e+00 1.744703352451324463e-01 0.000000000000000000e+00 1.312127807617187500e+03
2.600000000000000000e+01 3.732923076923074177e+02 6.320955276489257812e+01 -3.008422851562500000e+00 2.107853144407272339e-01 1.000000000000000000e+00 1.404869018554687500e+03
2.400000000000000000e+01 3.835846153846154039e+02 6.087149429321289062e+01 -3.196441650390625000e+00 2.694167196750640869e-01 1.705882310867309570e+00 1.344454467773437500e+03
5.500000000000000000e+01 3.938769230769229921e+02 6.685696411132812500e+01 -5.036315917968750000e+00 6.494212150573730469e-01 5.882353186607360840e-01 1.797725952148437500e+03
6.300000000000000000e+01 3.729461538461539476e+02 8.148332214355468750e+01 -5.956237792968750000e+00 5.748520493507385254e-01 5.294117927551269531e-01 1.556240722656250000e+03
1.200000000000000000e+01 3.689615384615383959e+02 1.119372940063476562e+02 -6.797729492187500000e+00 3.332208096981048584e-01 1.117647051811218262e+00 1.356571655273437500e+03
2.000000000000000000e+00 3.617384615384616495e+02 1.472313995361328125e+02 -9.086944580078125000e+00 5.325277447700500488e-01 3.529411852359771729e-01 1.646920410156250000e+03
2.400000000000000000e+01 4.036769230769231172e+02 1.457087249755859375e+02 -8.416137695312500000e+00 6.486741304397583008e-01 3.529411852359771729e-01 1.769819335937500000e+03
3.200000000000000000e+01 4.308923076923076678e+02 1.464806671142578125e+02 -8.102844238281250000e+00 6.371715068817138672e-01 1.176470592617988586e-01 1.740876586914062500e+03
3.000000000000000000e+01 4.846384615384616268e+02 1.513846893310546875e+02 -7.235321044921875000e+00 4.527752995491027832e-01 1.000000000000000000e+00 1.693974731445312500e+03
2.200000000000000000e+01 6.063846153846154721e+02 1.629800415039062500e+02 -6.367797851562500000e+00 5.277315378189086914e-01 4.117647111415863037e-01 1.558683349609375000e+03
3.000000000000000000e+01 6.935846153846155175e+02 1.942350463867187500e+02 -5.500244140625000000e+00 1.737658381462097168e-01 7.647058963775634766e-01 1.256008056640625000e+03
3.200000000000000000e+01 7.572153846153845507e+02 2.188579864501953125e+02 -4.692749023437500000e+00 3.494777381420135498e-01 5.882352963089942932e-02 1.433500854492187500e+03
3.100000000000000000e+01 7.426615384615383846e+02 2.312831573486328125e+02 -4.065277099609375000e+00 2.759564220905303955e-01 1.411764740943908691e+00 1.170563720703125000e+03
3.900000000000000000e+01 6.715461538461536293e+02 1.946640167236328125e+02 -2.810363769531250000e+00 2.390436381101608276e-01 1.294117689132690430e+00 1.166395263671875000e+03
1.000000000000000000e+01 5.829153846153847098e+02 1.762055206298828125e+02 -2.530944824218750000e+00 1.219272017478942871e-01 1.882352948188781738e+00 9.789197998046875000e+02
4.000000000000000000e+00 4.125923076923075996e+02 1.378426971435546875e+02 -2.668273925781250000e+00 0.000000000000000000e+00 2.058823585510253906e+00 6.221490478515625000e+02
1.500000000000000000e+01 3.845846153846152902e+02 1.225424957275390625e+02 -2.736938476562500000e+00 0.000000000000000000e+00 2.588235378265380859e+00 6.724612426757812500e+02
5.000000000000000000e+01 3.687692307692307736e+02 1.295456390380859375e+02 -3.185699462890625000e+00 9.999999776482582092e-03 1.705882310867309570e+00 9.177760620117187500e+02
1.100000000000000000e+01 3.803769230769230489e+02 1.630925598144531250e+02 -4.336639404296875000e+00 9.999999776482582092e-03 2.000000000000000000e+00 7.710650634765625000e+02
2.100000000000000000e+01 3.847307692307691696e+02 1.763834228515625000e+02 -4.912109375000000000e+00 1.498146951198577881e-01 2.117647171020507812e+00 1.023711120605468750e+03
6.300000000000000000e+01 4.042846153846154493e+02 1.787555389404296875e+02 -5.207855224609375000e+00 3.512907028198242188e-01 7.058823704719543457e-01 9.766940307617187500e+02
5.600000000000000000e+01 4.094153846153846530e+02 1.678735961914062500e+02 -5.503601074218750000e+00 4.941626787185668945e-01 5.882353186607360840e-01 1.333476684570312500e+03
5.600000000000000000e+01 4.003230769230767692e+02 1.630839691162109375e+02 -5.799377441406250000e+00 6.023047566413879395e-01 1.647058844566345215e+00 1.382190429687500000e+03
5.500000000000000000e+01 3.996461538461537657e+02 1.585526428222656250e+02 -5.950073242187500000e+00 4.174956083297729492e-01 1.823529362678527832e+00 1.214022094726562500e+03
5.400000000000000000e+01 3.758076923076920366e+02 1.441020202636718750e+02 -5.665710449218750000e+00 2.206518203020095825e-01 5.882353186607360840e-01 1.046741210937500000e+03
2.300000000000000000e+01 3.517076923076923549e+02 1.237099685668945312e+02 -5.381347656250000000e+00 4.041356444358825684e-01 4.117647111415863037e-01 1.313973144531250000e+03
6.500000000000000000e+01 3.517692307692308304e+02 1.108295364379882812e+02 -5.096984863281250000e+00 4.583927094936370850e-01 2.941176593303680420e-01 1.282486328125000000e+03
5.700000000000000000e+01 3.376615384615383277e+02 1.079386596679687500e+02 -4.683624267578125000e+00 4.587057828903198242e-01 1.117647051811218262e+00 1.288969116210937500e+03
1.100000000000000000e+01 3.209230769230770193e+02 1.118212738037109375e+02 -4.141265869140625000e+00 1.547616422176361084e-01 1.705882310867309570e+00 9.748952026367187500e+02
4.000000000000000000e+00 2.894769230769229011e+02 1.120392913818359375e+02 -2.345062255859375000e+00 9.999999776482582092e-03 1.588235259056091309e+00 6.590015869140625000e+02
1.300000000000000000e+01 3.086692307692306940e+02 1.487061462402343750e+02 -2.631164550781250000e+00 2.490526288747787476e-01 1.764705896377563477e+00 8.758236694335937500e+02
1.800000000000000000e+01 3.187307692307692264e+02 1.544589080810546875e+02 -2.878936767578125000e+00 3.895065784454345703e-01 1.705882310867309570e+00 9.800322875976562500e+02
4.900000000000000000e+01 3.655230769230769283e+02 1.255275573730468750e+02 -4.464172363281250000e+00 3.135133683681488037e-01 1.352941155433654785e+00 8.447094726562500000e+02
4.800000000000000000e+01 3.881692307692304666e+02 1.452277374267578125e+02 -4.704315185546875000e+00 3.134486377239227295e-01 2.941176593303680420e-01 7.642426147460937500e+02
2.300000000000000000e+01 4.088615384615382595e+02 1.684413452148437500e+02 -4.754028320312500000e+00 3.391690552234649658e-01 0.000000000000000000e+00 7.522435913085937500e+02
6.000000000000000000e+01 4.264692307692305917e+02 1.781003723144531250e+02 -4.803710937500000000e+00 4.834063947200775146e-01 0.000000000000000000e+00 9.083332519531250000e+02
5.300000000000000000e+01 4.562769230769231967e+02 1.800806884765625000e+02 -4.853393554687500000e+00 5.678046941757202148e-01 0.000000000000000000e+00 9.415878295898437500e+02
5.500000000000000000e+01 4.650615384615384755e+02 1.831793975830078125e+02 -4.640411376953125000e+00 6.503007411956787109e-01 2.352941185235977173e-01 1.001637939453125000e+03
5.400000000000000000e+01 4.751461538461538794e+02 1.891741638183593750e+02 -4.339874267578125000e+00 5.302198529243469238e-01 0.000000000000000000e+00 9.306531982421875000e+02
3.900000000000000000e+01 4.778461538461541522e+02 1.991797485351562500e+02 -4.039337158203125000e+00 4.225089848041534424e-01 0.000000000000000000e+00 8.322778320312500000e+02
5.200000000000000000e+01 4.835846153846154039e+02 2.032290344238281250e+02 -3.738769531250000000e+00 3.519141077995300293e-01 5.882353186607360840e-01 6.095007934570312500e+02
4.700000000000000000e+01 4.787692307692308304e+02 1.984616088867187500e+02 -3.399902343750000000e+00 1.833900213241577148e-01 5.882352963089942932e-02 4.796396179199218750e+02
2.400000000000000000e+01 4.740923076923074859e+02 1.972480468750000000e+02 -3.061035156250000000e+00 1.778890192508697510e-01 0.000000000000000000e+00 4.676260070800781250e+02
4.100000000000000000e+01 4.651923076923076792e+02 2.129121246337890625e+02 -2.446563720703125000e+00 9.999999776482582092e-03 1.882352948188781738e+00 3.668355102539062500e+02
2.600000000000000000e+01 4.943615384615386006e+02 2.225198059082031250e+02 -2.360809326171875000e+00 1.342068612575531006e-01 2.117647171020507812e+00 4.588038635253906250e+02
2.500000000000000000e+01 5.006538461538462457e+02 2.309091491699218750e+02 -2.275054931640625000e+00 1.195897981524467468e-01 1.470588207244873047e+00 4.104921875000000000e+02
5.800000000000000000e+01 5.449461538461539476e+02 2.209953918457031250e+02 -2.292114257812500000e+00 0.000000000000000000e+00 2.058823585510253906e+00 1.371932067871093750e+02
1.800000000000000000e+01 5.721923076923076223e+02 2.075072937011718750e+02 -2.583496093750000000e+00 9.999999776482582092e-03 2.823529481887817383e+00 1.756461486816406250e+02
7.000000000000000000e+00 6.031769230769227761e+02 2.151312866210937500e+02 -2.874877929687500000e+00 9.999999776482582092e-03 2.705882310867309570e+00 2.071368713378906250e+02
4.300000000000000000e+01 6.155000000000001137e+02 2.290790710449218750e+02 -3.166259765625000000e+00 9.999999776482582092e-03 2.823529481887817383e+00 2.237992401123046875e+02
3.000000000000000000e+01 6.023923076923078952e+02 1.994632263183593750e+02 -3.527160644531250000e+00 9.999999776482582092e-03 1.764705896377563477e+00 2.284121856689453125e+02
1.800000000000000000e+01 6.093538461538462343e+02 1.569778137207031250e+02 -3.911224365234375000e+00 1.247612684965133667e-01 1.352941155433654785e+00 2.823172607421875000e+02
3.500000000000000000e+01 6.327769230769231399e+02 1.109135360717773438e+02 -4.295318603515625000e+00 3.275998830795288086e-01 6.470588445663452148e-01 7.642727050781250000e+02
6.900000000000000000e+01 6.357153846153845507e+02 7.426531219482421875e+01 -4.679382324218750000e+00 5.914037823677062988e-01 9.411764740943908691e-01 7.676093750000000000e+02
6.000000000000000000e+01 6.445230769230767010e+02 5.675126266479492188e+01 -4.947845458984375000e+00 3.920899629592895508e-01 9.411764740943908691e-01 6.525900268554687500e+02
4.200000000000000000e+01 6.552384615384614790e+02 6.352451324462890625e+01 -5.216308593750000000e+00 1.611195504665374756e-01 1.058823585510253906e+00 3.464712524414062500e+02
6.200000000000000000e+01 6.613846153846156994e+02 1.204885025024414062e+02 -5.484771728515625000e+00 4.142257273197174072e-01 1.352941155433654785e+00 6.952625122070312500e+02
5.200000000000000000e+01 6.790846153846151765e+02 1.988460845947265625e+02 -5.717224121093750000e+00 6.045342683792114258e-01 1.058823585510253906e+00 8.137489624023437500e+02
1.600000000000000000e+01 6.811461538461536520e+02 2.625867614746093750e+02 -5.841644287109375000e+00 4.073457717895507812e-01 2.941176593303680420e-01 7.985698852539062500e+02
5.200000000000000000e+01 6.793846153846156994e+02 2.935590515136718750e+02 -5.966064453125000000e+00 3.887639045715332031e-01 5.882352963089942932e-02 6.500584716796875000e+02
4.700000000000000000e+01 6.873615384615384301e+02 2.773805541992187500e+02 -6.090515136718750000e+00 9.275892972946166992e-01 5.882353186607360840e-01 1.304722045898437500e+03
2.600000000000000000e+01 6.680384615384615472e+02 2.582146911621093750e+02 -6.026489257812500000e+00 7.427182197570800781e-01 2.941176593303680420e-01 1.112381469726562500e+03
5.300000000000000000e+01 6.334923076923076906e+02 2.117277374267578125e+02 -5.774078369140625000e+00 2.637450397014617920e-01 5.882353186607360840e-01 5.005629577636718750e+02
4.700000000000000000e+01 6.365615384615382482e+02 1.594013824462890625e+02 -5.521636962890625000e+00 6.040239334106445312e-01 2.941176593303680420e-01 8.076112060546875000e+02
2.100000000000000000e+01 6.179076923076922867e+02 1.216854553222656250e+02 -5.269195556640625000e+00 1.689414978027343750e-01 1.176470592617988586e-01 2.345931243896484375e+02
2.600000000000000000e+01 7.403769230769232763e+02 1.490070037841796875e+02 -4.178497314453125000e+00 2.972240149974822998e-01 2.941176593303680420e-01 5.759637451171875000e+02
4.400000000000000000e+01 7.563692307692308532e+02 1.950088958740234375e+02 -3.804809570312500000e+00 3.864593505859375000e-01 5.882352963089942932e-02 7.294168090820312500e+02
1.600000000000000000e+01 7.346923076923077360e+02 2.505933990478515625e+02 -3.375061035156250000e+00 1.556135714054107666e-01 8.823529481887817383e-01 4.673628845214843750e+02
5.800000000000000000e+01 7.219769230769228443e+02 2.692949218750000000e+02 -2.945312500000000000e+00 2.134094387292861938e-01 4.117647111415863037e-01 6.180996093750000000e+02
4.600000000000000000e+01 6.920538461538460524e+02 2.798715820312500000e+02 -2.515594482421875000e+00 1.065412461757659912e-01 1.176470592617988586e-01 4.930679626464843750e+02
4.900000000000000000e+01 7.606307692307696016e+02 3.084659118652343750e+02 -9.825134277343750000e-01 1.456716805696487427e-01 0.000000000000000000e+00 4.514568786621093750e+02
3.600000000000000000e+01 7.562923076923080998e+02 3.196835021972656250e+02 -7.486267089843750000e-01 9.999999776482582092e-03 5.882353186607360840e-01 3.979743652343750000e+02
5.600000000000000000e+01 8.043999999999995225e+02 3.235265808105468750e+02 -6.534423828125000000e-01 3.630962967872619629e-01 0.000000000000000000e+00 8.888444824218750000e+02
5.700000000000000000e+01 2.563476923076922958e+03 4.465028076171875000e+02 6.632781982421875000e+00 0.000000000000000000e+00 0.000000000000000000e+00 4.134738769531250000e+02
4.800000000000000000e+01 1.905692307692308532e+03 1.853204956054687500e+02 3.374053955078125000e+00 0.000000000000000000e+00 2.352941185235977173e-01 7.003946533203125000e+02
1.900000000000000000e+01 1.594369230769231763e+03 1.880003814697265625e+02 2.234832763671875000e+00 0.000000000000000000e+00 0.000000000000000000e+00 1.186470336914062500e+03
0.000000000000000000e+00 1.288292307692307531e+03 1.975836791992187500e+02 9.948730468750000000e-01 9.999999776482582092e-03 0.000000000000000000e+00 1.585523681640625000e+03
6.000000000000000000e+00 1.111653846153846416e+03 4.239746093750000000e+02 -1.468261718750000000e+00 0.000000000000000000e+00 0.000000000000000000e+00 1.947363281250000000e+03
2.000000000000000000e+00 8.248076923076920366e+02 3.511125793457031250e+02 -1.451507568359375000e+00 0.000000000000000000e+00 5.882353186607360840e-01 1.812723876953125000e+03
3.400000000000000000e+01 7.858461538461538112e+02 2.573170471191406250e+02 -1.434783935546875000e+00 0.000000000000000000e+00 6.470588445663452148e-01 9.251932983398437500e+02
5.900000000000000000e+01 5.065076923076925937e+02 2.023168792724609375e+02 -1.498809814453125000e+00 1.406033337116241455e-01 2.352941185235977173e-01 1.782346801757812500e+03
2.000000000000000000e+00 3.453692307692305121e+02 1.859168701171875000e+02 -1.805236816406250000e+00 0.000000000000000000e+00 5.882352963089942932e-02 4.567500915527343750e+02
3.800000000000000000e+01 4.010846153846154039e+02 1.120467147827148438e+02 -2.418060302734375000e+00 0.000000000000000000e+00 2.352941185235977173e-01 7.994185180664062500e+02
2.300000000000000000e+01 5.994384615384615245e+02 1.508493652343750000e+02 -2.695922851562500000e+00 0.000000000000000000e+00 7.058823704719543457e-01 5.162697753906250000e+02
6.000000000000000000e+01 1.000984615384615381e+03 3.016489868164062500e+02 -3.194488525390625000e+00 0.000000000000000000e+00 2.352941185235977173e-01 1.184969482421875000e+03
5.700000000000000000e+01 1.353630769230769602e+03 4.431356201171875000e+02 -3.493255615234375000e+00 0.000000000000000000e+00 0.000000000000000000e+00 7.742891845703125000e+02
3.300000000000000000e+01 1.348661538461538157e+03 4.416344909667968750e+02 -3.476165771484375000e+00 2.286592274904251099e-01 0.000000000000000000e+00 1.534231323242187500e+03
6.700000000000000000e+01 6.419538461538463707e+02 1.991112213134765625e+02 -1.672760009765625000e+00 1.069910526275634766e-01 0.000000000000000000e+00 1.791572998046875000e+03
3.000000000000000000e+00 3.727923076923077588e+02 1.733818054199218750e+02 -5.255126953125000000e-01 0.000000000000000000e+00 0.000000000000000000e+00 1.080350830078125000e+03
1.000000000000000000e+00 3.451153846153846416e+02 1.256145248413085938e+02 6.023864746093750000e-01 0.000000000000000000e+00 0.000000000000000000e+00 8.386262817382812500e+02
4.000000000000000000e+00 3.216076923076923322e+02 1.052089462280273438e+02 1.082366943359375000e+00 0.000000000000000000e+00 0.000000000000000000e+00 7.662572021484375000e+02
5.000000000000000000e+00 2.921999999999999886e+02 9.556344604492187500e+01 1.478424072265625000e+00 0.000000000000000000e+00 0.000000000000000000e+00 7.198114624023437500e+02
2.000000000000000000e+00 2.614923076923076906e+02 9.180905151367187500e+01 1.874450683593750000e+00 0.000000000000000000e+00 2.941176593303680420e-01 7.658287353515625000e+02
1.000000000000000000e+00 2.723000000000000682e+02 9.767330932617187500e+01 2.270477294921875000e+00 0.000000000000000000e+00 0.000000000000000000e+00 7.925377807617187500e+02
0.000000000000000000e+00 2.811230769230768374e+02 9.677819824218750000e+01 2.410217285156250000e+00 0.000000000000000000e+00 0.000000000000000000e+00 7.244193115234375000e+02
2.000000000000000000e+00 3.138461538461538680e+02 9.474153900146484375e+01 2.464477539062500000e+00 0.000000000000000000e+00 0.000000000000000000e+00 7.166848754882812500e+02
0.000000000000000000e+00 3.226076923076924459e+02 1.027501831054687500e+02 2.518768310546875000e+00 0.000000000000000000e+00 0.000000000000000000e+00 7.112188110351562500e+02
1.000000000000000000e+00 3.043076923076922640e+02 1.204988250732421875e+02 2.573028564453125000e+00 0.000000000000000000e+00 0.000000000000000000e+00 6.731296997070312500e+02
6.000000000000000000e+00 3.099769230769231285e+02 1.289354400634765625e+02 2.079528808593750000e+00 0.000000000000000000e+00 0.000000000000000000e+00 7.222064819335937500e+02
4.000000000000000000e+00 3.167538461538462116e+02 1.360668334960937500e+02 1.832794189453125000e+00 0.000000000000000000e+00 0.000000000000000000e+00 5.900749511718750000e+02
1.000000000000000000e+00 3.303923076923076678e+02 1.373011932373046875e+02 1.568756103515625000e+00 0.000000000000000000e+00 0.000000000000000000e+00 6.258916625976562500e+02
3.000000000000000000e+00 4.775384615384616041e+02 2.019908752441406250e+02 4.144287109375000000e-02 0.000000000000000000e+00 1.000000000000000000e+00 5.094258422851562500e+02
6.200000000000000000e+01 5.573769230769229353e+02 2.303714752197265625e+02 3.733520507812500000e-01 0.000000000000000000e+00 2.352941185235977173e-01 6.901782226562500000e+02
2.200000000000000000e+01 5.415307692307693515e+02 2.356947479248046875e+02 4.304504394531250000e-01 0.000000000000000000e+00 2.941176593303680420e-01 3.066116333007812500e+02
9.000000000000000000e+00 5.480153846153846189e+02 2.192055511474609375e+02 3.131408691406250000e-01 0.000000000000000000e+00 0.000000000000000000e+00 2.532418823242187500e+02
2.300000000000000000e+01 5.350076923076923094e+02 2.036578216552734375e+02 2.544860839843750000e-01 0.000000000000000000e+00 2.352941185235977173e-01 2.742057800292968750e+02
4.100000000000000000e+01 5.892461538461536747e+02 1.615843963623046875e+02 -1.823120117187500000e-01 0.000000000000000000e+00 0.000000000000000000e+00 2.351945648193359375e+02
5.300000000000000000e+01 5.950923076923077133e+02 1.843513183593750000e+02 -3.453063964843750000e-01 0.000000000000000000e+00 0.000000000000000000e+00 2.980043334960937500e+02
4.800000000000000000e+01 6.860692307692307850e+02 2.428561401367187500e+02 -8.962402343750000000e-01 0.000000000000000000e+00 0.000000000000000000e+00 3.873338012695312500e+02
5.400000000000000000e+01 7.320538461538465071e+02 2.312655944824218750e+02 -1.081756591796875000e+00 0.000000000000000000e+00 0.000000000000000000e+00 3.902479248046875000e+02
6.400000000000000000e+01 7.743923076923080089e+02 2.329653320312500000e+02 -1.154754638671875000e+00 0.000000000000000000e+00 0.000000000000000000e+00 3.757003173828125000e+02
6.300000000000000000e+01 7.913615384615385437e+02 2.617131347656250000e+02 -1.227752685546875000e+00 0.000000000000000000e+00 0.000000000000000000e+00 4.201398315429687500e+02
5.800000000000000000e+01 8.071999999999997044e+02 3.030182495117187500e+02 -1.300720214843750000e+00 0.000000000000000000e+00 0.000000000000000000e+00 4.399709472656250000e+02
6.000000000000000000e+01 8.297307692307695106e+02 3.325563354492187500e+02 -1.355712890625000000e+00 0.000000000000000000e+00 5.882352963089942932e-02 3.974946899414062500e+02
5.900000000000000000e+01 8.407000000000001592e+02 2.916900939941406250e+02 -1.357635498046875000e+00 9.999999776482582092e-03 0.000000000000000000e+00 4.088393859863281250e+02
6.100000000000000000e+01 8.171384615384612289e+02 2.151197814941406250e+02 -1.374359130859375000e+00 9.999999776482582092e-03 5.294117927551269531e-01 3.753635864257812500e+02
3.300000000000000000e+01 7.912307692307693969e+02 1.789814300537109375e+02 -1.404876708984375000e+00 9.999999776482582092e-03 5.294117927551269531e-01 3.765173950195312500e+02
5.300000000000000000e+01 7.520000000000000000e+02 1.729114379882812500e+02 -1.465911865234375000e+00 9.999999776482582092e-03 0.000000000000000000e+00 3.374079895019531250e+02
4.600000000000000000e+01 7.365076923076924231e+02 2.116774444580078125e+02 -1.543914794921875000e+00 9.999999776482582092e-03 2.352941185235977173e-01 3.156413879394531250e+02
5.000000000000000000e+01 7.288692307692302847e+02 2.665374755859375000e+02 -1.637786865234375000e+00 9.999999776482582092e-03 0.000000000000000000e+00 2.930101318359375000e+02
3.800000000000000000e+01 7.236769230769233445e+02 3.108007202148437500e+02 -1.731658935546875000e+00 9.999999776482582092e-03 0.000000000000000000e+00 2.756517639160156250e+02
7.300000000000000000e+01 7.072769230769229125e+02 3.156391906738281250e+02 -1.825531005859375000e+00 9.999999776482582092e-03 0.000000000000000000e+00 2.437301483154296875e+02
5.500000000000000000e+01 6.961307692307689194e+02 3.286200256347656250e+02 -1.892486572265625000e+00 9.999999776482582092e-03 1.176470592617988586e-01 1.853336334228515625e+02
5.800000000000000000e+01 6.843615384615385437e+02 3.451369628906250000e+02 -1.959442138671875000e+00 0.000000000000000000e+00 0.000000000000000000e+00 1.551781311035156250e+02
6.100000000000000000e+01 6.831307692307692605e+02 3.466280822753906250e+02 -2.026367187500000000e+00 0.000000000000000000e+00 0.000000000000000000e+00 1.339120788574218750e+02
2.300000000000000000e+01 6.748384615384615017e+02 3.364293518066406250e+02 -2.062835693359375000e+00 0.000000000000000000e+00 0.000000000000000000e+00 1.064923095703125000e+02
6.000000000000000000e+01 6.858384615384612744e+02 3.355317382812500000e+02 -2.007812500000000000e+00 0.000000000000000000e+00 0.000000000000000000e+00 1.116545715332031250e+02
1.100000000000000000e+01 6.940692307692307850e+02 3.514368286132812500e+02 -1.952789306640625000e+00 9.999999776482582092e-03 0.000000000000000000e+00 1.626307373046875000e+02
3.300000000000000000e+01 6.904230769230769056e+02 3.498670043945312500e+02 -1.897796630859375000e+00 9.999999776482582092e-03 5.882352963089942932e-02 1.600920257568359375e+02
4.700000000000000000e+01 6.967846153846154493e+02 3.394953918457031250e+02 -1.889465332031250000e+00 9.999999776482582092e-03 0.000000000000000000e+00 9.315466308593750000e+01
1.400000000000000000e+01 7.058615384615386574e+02 3.250245666503906250e+02 -1.927886962890625000e+00 9.999999776482582092e-03 0.000000000000000000e+00 6.344881820678710938e+01
1.600000000000000000e+01 7.023615384615385437e+02 2.924002685546875000e+02 -2.004669189453125000e+00 9.999999776482582092e-03 5.882352963089942932e-02 6.465886688232421875e+01
5.600000000000000000e+01 7.007461538461537884e+02 2.839918518066406250e+02 -1.988128662109375000e+00 9.999999776482582092e-03 0.000000000000000000e+00 1.213530960083007812e+02
9.000000000000000000e+00 7.054846153846151537e+02 2.866315307617187500e+02 -1.953247070312500000e+00 9.999999776482582092e-03 5.882352963089942932e-02 5.528144073486328125e+01
4.900000000000000000e+01 7.123461538461540385e+02 2.987567749023437500e+02 -1.918395996093750000e+00 9.999999776482582092e-03 0.000000000000000000e+00 7.659990692138671875e+01
4.900000000000000000e+01 7.194923076923075769e+02 3.134715881347656250e+02 -1.883514404296875000e+00 9.999999776482582092e-03 0.000000000000000000e+00 1.512087402343750000e+02
4.600000000000000000e+01 7.366615384615386120e+02 3.264302368164062500e+02 -2.049438476562500000e+00 9.999999776482582092e-03 0.000000000000000000e+00 2.064480590820312500e+02
4.900000000000000000e+01 7.589846153846153811e+02 3.368789367675781250e+02 -2.215362548828125000e+00 9.999999776482582092e-03 0.000000000000000000e+00 2.432402648925781250e+02
6.300000000000000000e+01 7.994615384615382254e+02 3.390821228027343750e+02 -2.381256103515625000e+00 9.999999776482582092e-03 0.000000000000000000e+00 2.552024536132812500e+02
6.100000000000000000e+01 8.019230769230770193e+02 3.424559936523437500e+02 -2.548004150390625000e+00 9.999999776482582092e-03 0.000000000000000000e+00 2.697831726074218750e+02
6.000000000000000000e+01 8.076076923076924459e+02 3.497225341796875000e+02 -2.717193603515625000e+00 9.999999776482582092e-03 5.882352963089942932e-02 2.782084350585937500e+02
2.500000000000000000e+01 8.333153846153848008e+02 3.643891906738281250e+02 -2.886352539062500000e+00 9.999999776482582092e-03 6.470588445663452148e-01 3.105252075195312500e+02
3.000000000000000000e+01 8.349846153846156085e+02 3.817775878906250000e+02 -3.055541992187500000e+00 9.999999776482582092e-03 9.411764740943908691e-01 3.307462158203125000e+02
4.600000000000000000e+01 8.945769230769230944e+02 3.607905578613281250e+02 -3.445220947265625000e+00 1.513962000608444214e-01 0.000000000000000000e+00 4.876656494140625000e+02
3.800000000000000000e+01 9.037307692307695106e+02 2.559875640869140625e+02 -3.437866210937500000e+00 1.554817110300064087e-01 0.000000000000000000e+00 5.281895751953125000e+02
2.400000000000000000e+01 9.250538461538459387e+02 1.962729949951171875e+02 -3.399047851562500000e+00 1.782589107751846313e-01 2.941176593303680420e-01 5.387216186523437500e+02
5.100000000000000000e+01 9.627307692307699654e+02 1.801723632812500000e+02 -3.360229492187500000e+00 1.814021319150924683e-01 6.470588445663452148e-01 5.363314208984375000e+02
1.200000000000000000e+01 9.391923076923079634e+02 1.776747589111328125e+02 -3.321380615234375000e+00 1.242327764630317688e-01 5.882353186607360840e-01 4.574375305175781250e+02
4.900000000000000000e+01 9.549769230769232990e+02 2.126609039306640625e+02 -3.257263183593750000e+00 1.329262256622314453e-01 6.470588445663452148e-01 5.048030090332031250e+02
5.100000000000000000e+01 1.090830769230769192e+03 2.787969055175781250e+02 -3.128997802734375000e+00 2.656746506690979004e-01 0.000000000000000000e+00 7.426630249023437500e+02
4.800000000000000000e+01 1.066784615384615336e+03 3.057728576660156250e+02 -3.058959960937500000e+00 9.999999776482582092e-03 0.000000000000000000e+00 3.935045471191406250e+02
6.100000000000000000e+01 1.134484615384615836e+03 3.763764038085937500e+02 -2.883422851562500000e+00 2.559279799461364746e-01 0.000000000000000000e+00 6.021996459960937500e+02
7.200000000000000000e+01 1.157392307692307668e+03 4.557687072753906250e+02 -2.795654296875000000e+00 9.999999776482582092e-03 0.000000000000000000e+00 4.108850708007812500e+02
6.000000000000000000e+01 1.167846153846153811e+03 4.759852600097656250e+02 -2.659210205078125000e+00 1.064877659082412720e-01 0.000000000000000000e+00 4.974002685546875000e+02
6.700000000000000000e+01 1.155615384615384983e+03 4.725524597167968750e+02 -2.474090576171875000e+00 9.999999776482582092e-03 5.882352963089942932e-02 4.692334594726562500e+02
5.900000000000000000e+01 1.083492307692307577e+03 4.746387634277343750e+02 -2.103851318359375000e+00 2.166021019220352173e-01 8.823529481887817383e-01 6.121040039062500000e+02
7.100000000000000000e+01 1.069492307692307577e+03 4.833244018554687500e+02 -1.895080566406250000e+00 9.999999776482582092e-03 0.000000000000000000e+00 2.961255798339843750e+02
5.900000000000000000e+01 1.049630769230768465e+03 4.863912048339843750e+02 -1.678405761718750000e+00 9.999999776482582092e-03 0.000000000000000000e+00 5.104496459960937500e+02
6.600000000000000000e+01 1.036515384615385074e+03 4.849246826171875000e+02 -1.461730957031250000e+00 9.999999776482582092e-03 2.352941185235977173e-01 3.090615844726562500e+02
6.400000000000000000e+01 1.032099999999999454e+03 4.807834777832031250e+02 -1.245056152343750000e+00 9.999999776482582092e-03 0.000000000000000000e+00 3.820905151367187500e+02
5.600000000000000000e+01 1.000153846153846189e+03 4.419418945312500000e+02 -1.042236328125000000e+00 9.999999776482582092e-03 2.941176593303680420e-01 3.131188659667968750e+02
7.100000000000000000e+01 9.884000000000000909e+02 4.203238525390625000e+02 -6.365966796875000000e-01 9.999999776482582092e-03 2.941176593303680420e-01 2.802671203613281250e+02
4.700000000000000000e+01 1.007969230769230990e+03 4.324518737792968750e+02 -4.030456542968750000e-01 0.000000000000000000e+00 0.000000000000000000e+00 2.058789367675781250e+02
6.100000000000000000e+01 1.001300000000000409e+03 4.534929199218750000e+02 -7.727050781250000000e-02 0.000000000000000000e+00 1.176470592617988586e-01 2.019813385009765625e+02
6.300000000000000000e+01 1.067753846153846553e+03 1.945627441406250000e+02 5.742797851562500000e-01 0.000000000000000000e+00 0.000000000000000000e+00 1.912445068359375000e+02
4.400000000000000000e+01 1.096669230769230580e+03 9.706044769287109375e+01 7.572021484375000000e-01 0.000000000000000000e+00 0.000000000000000000e+00 1.509447021484375000e+02
1.200000000000000000e+01 1.154015384615384619e+03 4.496254882812500000e+02 1.072296142578125000e+00 0.000000000000000000e+00 0.000000000000000000e+00 4.502707824707031250e+02
1.800000000000000000e+01 1.086192307692306940e+03 4.517903137207031250e+02 1.139495849609375000e+00 0.000000000000000000e+00 0.000000000000000000e+00 2.522004699707031250e+02
2.800000000000000000e+01 1.406115384615384301e+03 4.394046020507812500e+02 1.075949096679687500e+01 0.000000000000000000e+00 0.000000000000000000e+00 1.659732971191406250e+02
2.400000000000000000e+01 1.478992307692307577e+03 4.371826782226562500e+02 1.062036132812500000e+01 0.000000000000000000e+00 0.000000000000000000e+00 1.503616790771484375e+02
2.400000000000000000e+01 9.699000000000004320e+02 4.308015136718750000e+02 1.057928466796875000e+01 0.000000000000000000e+00 0.000000000000000000e+00 9.625992584228515625e+01
1.600000000000000000e+01 8.821153846153847553e+02 3.306896972656250000e+02 1.053820800781250000e+01 0.000000000000000000e+00 0.000000000000000000e+00 6.871340942382812500e+01
4.000000000000000000e+01 8.649538461538462570e+02 3.302496337890625000e+02 9.130737304687500000e+00 0.000000000000000000e+00 0.000000000000000000e+00 1.629179573059082031e+01
5.000000000000000000e+00 8.893461538461534701e+02 3.243883361816406250e+02 8.126922607421875000e+00 0.000000000000000000e+00 0.000000000000000000e+00 3.978298950195312500e+01
9.000000000000000000e+00 8.994538461538462570e+02 3.483381347656250000e+02 7.930480957031250000e+00 0.000000000000000000e+00 0.000000000000000000e+00 2.559878387451171875e+02
5.900000000000000000e+01 8.974999999999998863e+02 3.900284423828125000e+02 7.760742187500000000e+00 0.000000000000000000e+00 0.000000000000000000e+00 3.618285522460937500e+02
4.900000000000000000e+01 8.715923076923081680e+02 3.882850036621093750e+02 7.617767333984375000e+00 0.000000000000000000e+00 0.000000000000000000e+00 4.353368225097656250e+02
3.600000000000000000e+01 5.484307692307692150e+02 2.816322937011718750e+02 6.655242919921875000e+00 0.000000000000000000e+00 0.000000000000000000e+00 1.598443145751953125e+02
3.000000000000000000e+00 6.550076923076923094e+02 2.288674163818359375e+02 6.382171630859375000e+00 0.000000000000000000e+00 0.000000000000000000e+00 2.156177215576171875e+02
3.000000000000000000e+00 5.786000000000000227e+02 2.407225036621093750e+02 6.136413574218750000e+00 0.000000000000000000e+00 0.000000000000000000e+00 1.785376281738281250e+02
4.000000000000000000e+00 5.851153846153847553e+02 2.521836242675781250e+02 6.046600341796875000e+00 0.000000000000000000e+00 0.000000000000000000e+00 1.774081420898437500e+02
2.100000000000000000e+01 5.492923076923074177e+02 2.434777526855468750e+02 5.462738037109375000e+00 0.000000000000000000e+00 0.000000000000000000e+00 1.361696472167968750e+02
1.300000000000000000e+01 5.586230769230769511e+02 1.969357604980468750e+02 5.265838623046875000e+00 0.000000000000000000e+00 0.000000000000000000e+00 1.900337829589843750e+02
4.000000000000000000e+01 6.256692307692309214e+02 2.502021331787109375e+02 5.186309814453125000e+00 0.000000000000000000e+00 0.000000000000000000e+00 1.665733642578125000e+02
5.700000000000000000e+01 6.565307692307693515e+02 2.414093170166015625e+02 5.231750488281250000e+00 0.000000000000000000e+00 0.000000000000000000e+00 1.657427825927734375e+02
3.400000000000000000e+01 6.186384615384616836e+02 2.599875488281250000e+02 5.401184082031250000e+00 0.000000000000000000e+00 5.882352963089942932e-02 1.596784210205078125e+02
6.100000000000000000e+01 6.278461538461534701e+02 3.007786865234375000e+02 5.612457275390625000e+00 0.000000000000000000e+00 1.176470637321472168e+00 2.045933990478515625e+02
6.600000000000000000e+01 6.290307692307693515e+02 2.828883056640625000e+02 5.312591552734375000e+00 0.000000000000000000e+00 7.647058963775634766e-01 1.313358306884765625e+02
5.400000000000000000e+01 4.818230769230771102e+02 1.872810211181640625e+02 4.092468261718750000e+00 0.000000000000000000e+00 1.823529362678527832e+00 1.016230392456054688e+02
4.000000000000000000e+00 4.700384615384618314e+02 1.873971710205078125e+02 3.908172607421875000e+00 0.000000000000000000e+00 2.000000000000000000e+00 1.534979705810546875e+02
2.000000000000000000e+00 4.160076923076924800e+02 1.537723846435546875e+02 4.596862792968750000e+00 0.000000000000000000e+00 2.058823585510253906e+00 9.149224090576171875e+01
0.000000000000000000e+00 3.888538461538461206e+02 1.062998962402343750e+02 4.502868652343750000e+00 0.000000000000000000e+00 2.764705896377563477e+00 6.995143127441406250e+01
1.000000000000000000e+00 3.748615384615385437e+02 1.077050628662109375e+02 4.373474121093750000e+00 0.000000000000000000e+00 1.588235259056091309e+00 4.001633834838867188e+01
7.000000000000000000e+00 3.743461538461538680e+02 1.128500137329101562e+02 4.244079589843750000e+00 0.000000000000000000e+00 2.235294103622436523e+00 5.616159439086914062e+01
1.000000000000000000e+00 3.684461538461540613e+02 1.146409149169921875e+02 4.114715576171875000e+00 0.000000000000000000e+00 2.117647171020507812e+00 8.083637237548828125e+01
1.000000000000000000e+00 3.659307692307692150e+02 1.122894744873046875e+02 3.952270507812500000e+00 0.000000000000000000e+00 2.823529481887817383e+00 5.712685012817382812e+01
0.000000000000000000e+00 3.620769230769229239e+02 1.125450515747070312e+02 3.561218261718750000e+00 0.000000000000000000e+00 2.470588207244873047e+00 6.690753936767578125e+01
1.000000000000000000e+00 3.491538461538459615e+02 1.274750442504882812e+02 3.365722656250000000e+00 0.000000000000000000e+00 1.882352948188781738e+00 1.370745086669921875e+02
1.000000000000000000e+00 3.481384615384613426e+02 1.430238647460937500e+02 3.153137207031250000e+00 0.000000000000000000e+00 3.117647171020507812e+00 2.250067138671875000e+02
0.000000000000000000e+00 3.480769230769232649e+02 1.532011108398437500e+02 2.716644287109375000e+00 0.000000000000000000e+00 1.588235259056091309e+00 2.066237640380859375e+02
1.000000000000000000e+00 3.419538461538459728e+02 1.596727447509765625e+02 2.498382568359375000e+00 0.000000000000000000e+00 2.294117689132690430e+00 2.138556976318359375e+02
1.000000000000000000e+00 3.429769230769230717e+02 1.604888458251953125e+02 2.358032226562500000e+00 0.000000000000000000e+00 2.588235378265380859e+00 2.651117858886718750e+02
1.000000000000000000e+00 3.107538461538462116e+02 1.430933074951171875e+02 1.876770019531250000e+00 0.000000000000000000e+00 2.941176414489746094e+00 2.527300109863281250e+02
5.000000000000000000e+00 2.685153846153845620e+02 9.147219085693359375e+01 2.126190185546875000e+00 0.000000000000000000e+00 2.352941274642944336e+00 2.628200073242187500e+02
1.600000000000000000e+01 2.641153846153848122e+02 8.084261322021484375e+01 2.245788574218750000e+00 0.000000000000000000e+00 2.176470518112182617e+00 2.250380096435546875e+02
1.000000000000000000e+00 2.599384615384615245e+02 7.274383544921875000e+01 2.375457763671875000e+00 0.000000000000000000e+00 2.705882310867309570e+00 2.250364532470703125e+02
1.000000000000000000e+00 2.581307692307692605e+02 6.907365417480468750e+01 2.505126953125000000e+00 0.000000000000000000e+00 2.411764621734619141e+00 2.343245391845703125e+02
1.000000000000000000e+00 2.521846153846152845e+02 6.965079498291015625e+01 2.634796142578125000e+00 0.000000000000000000e+00 1.882352948188781738e+00 2.254527282714843750e+02
0.000000000000000000e+00 2.489923076923077758e+02 7.090964508056640625e+01 2.704101562500000000e+00 0.000000000000000000e+00 1.705882310867309570e+00 1.311502075195312500e+02
0.000000000000000000e+00 2.455538461538461092e+02 7.423822021484375000e+01 2.773406982421875000e+00 0.000000000000000000e+00 1.588235259056091309e+00 2.035362548828125000e+02
1.000000000000000000e+00 2.440615384615384471e+02 7.845351409912109375e+01 2.842681884765625000e+00 0.000000000000000000e+00 2.176470518112182617e+00 2.034880523681640625e+02
0.000000000000000000e+00 2.433846153846153868e+02 9.013085937500000000e+01 2.728332519531250000e+00 0.000000000000000000e+00 2.235294103622436523e+00 2.859591064453125000e+02
1.000000000000000000e+00 2.445230769230768999e+02 9.541281890869140625e+01 2.654418945312500000e+00 0.000000000000000000e+00 2.647058725357055664e+00 2.509529266357421875e+02
0.000000000000000000e+00 2.585461538461538566e+02 1.103217697143554688e+02 2.244903564453125000e+00 0.000000000000000000e+00 1.647058844566345215e+00 3.436220092773437500e+02
0.000000000000000000e+00 2.846230769230770079e+02 1.234688796997070312e+02 1.836364746093750000e+00 0.000000000000000000e+00 1.764705896377563477e+00 3.093370971679687500e+02
0.000000000000000000e+00 2.959384615384615813e+02 1.268905487060546875e+02 1.709350585937500000e+00 0.000000000000000000e+00 2.352941274642944336e+00 3.303067016601562500e+02
1.000000000000000000e+00 3.265384615384616609e+02 1.372972564697265625e+02 1.365753173828125000e+00 0.000000000000000000e+00 2.294117689132690430e+00 4.064066467285156250e+02
1.200000000000000000e+01 3.135461538461537430e+02 1.326143798828125000e+02 1.032257080078125000e+00 0.000000000000000000e+00 2.000000000000000000e+00 3.374220886230468750e+02
1.000000000000000000e+00 2.972769230769230262e+02 1.234823303222656250e+02 9.682312011718750000e-01 0.000000000000000000e+00 1.470588207244873047e+00 3.724777221679687500e+02
1.000000000000000000e+00 2.883692307692306827e+02 1.120914840698242188e+02 9.303588867187500000e-01 0.000000000000000000e+00 1.705882310867309570e+00 3.218961181640625000e+02
0.000000000000000000e+00 2.592230769230769738e+02 8.855759429931640625e+01 8.951110839843750000e-01 0.000000000000000000e+00 1.705882310867309570e+00 1.858110198974609375e+02
1.000000000000000000e+00 2.569923076923078042e+02 8.030816650390625000e+01 9.377746582031250000e-01 0.000000000000000000e+00 1.823529362678527832e+00 1.506039886474609375e+02
1.000000000000000000e+00 2.523153846153846871e+02 7.300537109375000000e+01 9.985656738281250000e-01 0.000000000000000000e+00 2.294117689132690430e+00 1.460004882812500000e+02
0.000000000000000000e+00 2.566153846153844142e+02 7.135312652587890625e+01 1.059387207031250000e+00 0.000000000000000000e+00 2.470588207244873047e+00 1.700292053222656250e+02
1.000000000000000000e+00 2.864923076923076337e+02 9.907601165771484375e+01 1.205291748046875000e+00 0.000000000000000000e+00 1.470588207244873047e+00 1.987043914794921875e+02
1.000000000000000000e+00 3.078076923076922640e+02 1.228119354248046875e+02 1.290374755859375000e+00 0.000000000000000000e+00 9.411764740943908691e-01 2.359214935302734375e+02
1.000000000000000000e+00 3.742769230769230262e+02 1.495344390869140625e+02 1.397521972656250000e+00 0.000000000000000000e+00 1.294117689132690430e+00 2.197910003662109375e+02
2.300000000000000000e+01 5.913846153846151310e+02 2.282541046142578125e+02 -1.340026855468750000e-01 0.000000000000000000e+00 1.764705896377563477e+00 7.712743530273437500e+02
1.400000000000000000e+01 5.886769230769230035e+02 2.099471740722656250e+02 -7.652893066406250000e-01 0.000000000000000000e+00 2.941176593303680420e-01 6.919133300781250000e+02
2.000000000000000000e+01 5.962384615384618201e+02 1.944104461669921875e+02 -1.396575927734375000e+00 7.232962250709533691e-01 0.000000000000000000e+00 1.903739013671875000e+03
2.300000000000000000e+01 5.771615384615386120e+02 1.908809204101562500e+02 -2.240203857421875000e+00 9.999999776482582092e-03 2.941176593303680420e-01 1.000171142578125000e+03
1.200000000000000000e+01 5.569846153846153811e+02 1.958464660644531250e+02 -3.154602050781250000e+00 9.999999776482582092e-03 5.882352963089942932e-02 1.214802978515625000e+03
2.500000000000000000e+01 5.549769230769234127e+02 2.070489501953125000e+02 -4.069000244140625000e+00 2.739217579364776611e-01 1.176470592617988586e-01 1.327098876953125000e+03
3.200000000000000000e+01 4.716615384615384414e+02 2.161715393066406250e+02 -7.285400390625000000e+00 0.000000000000000000e+00 0.000000000000000000e+00 1.134285156250000000e+03
3.000000000000000000e+01 4.684307692307691013e+02 1.771397247314453125e+02 -7.929473876953125000e+00 8.407263159751892090e-01 0.000000000000000000e+00 1.778966552734375000e+03
1.000000000000000000e+01 4.412692307692307168e+02 1.558760528564453125e+02 -7.984313964843750000e+00 8.960747718811035156e-01 2.352941185235977173e-01 1.948863525390625000e+03
8.000000000000000000e+00 4.135923076923075996e+02 1.388983612060546875e+02 -8.039154052734375000e+00 5.854576826095581055e-01 3.529411852359771729e-01 1.711888427734375000e+03
8.000000000000000000e+00 3.669615384615383391e+02 1.271091918945312500e+02 -7.680084228515625000e+00 3.641799390316009521e-01 6.470588445663452148e-01 1.473194580078125000e+03
3.000000000000000000e+00 3.458999999999999773e+02 1.092453460693359375e+02 -6.907104492187500000e+00 9.999999776482582092e-03 1.117647051811218262e+00 8.614673461914062500e+02
2.000000000000000000e+00 3.575692307692309555e+02 9.625018310546875000e+01 -6.134124755859375000e+00 9.999999776482582092e-03 1.058823585510253906e+00 8.560924072265625000e+02
6.000000000000000000e+00 4.208461538461538680e+02 9.190103912353515625e+01 -5.361145019531250000e+00 9.999999776482582092e-03 1.235294103622436523e+00 1.080395874023437500e+03
1.900000000000000000e+01 5.298076923076924913e+02 9.393987274169921875e+01 -4.794494628906250000e+00 1.362325996160507202e-01 2.176470518112182617e+00 1.213892211914062500e+03
6.500000000000000000e+01 5.755692307692306713e+02 9.809244537353515625e+01 -4.296661376953125000e+00 5.367946028709411621e-01 2.294117689132690430e+00 1.329839111328125000e+03
4.700000000000000000e+01 5.801692307692305803e+02 9.988389587402343750e+01 -3.798828125000000000e+00 2.917641401290893555e-01 2.058823585510253906e+00 1.453328735351562500e+03
8.000000000000000000e+00 5.260923076923074859e+02 8.697852325439453125e+01 -3.364532470703125000e+00 9.999999776482582092e-03 1.235294103622436523e+00 7.201566772460937500e+02
8.000000000000000000e+00 4.570846153846155744e+02 8.666401672363281250e+01 -3.428100585937500000e+00 9.999999776482582092e-03 8.235294222831726074e-01 8.027224121093750000e+02
1.200000000000000000e+01 4.385923076923075996e+02 8.754269409179687500e+01 -3.491668701171875000e+00 1.721615344285964966e-01 2.470588207244873047e+00 9.950728759765625000e+02
1.500000000000000000e+01 4.121076923076922185e+02 8.534367370605468750e+01 -3.762359619140625000e+00 2.321683913469314575e-01 2.176470518112182617e+00 1.035452880859375000e+03
6.000000000000000000e+01 4.064999999999999432e+02 8.582011413574218750e+01 -4.654449462890625000e+00 1.187674850225448608e-01 8.823529481887817383e-01 1.006245178222656250e+03
6.800000000000000000e+01 4.083769230769229921e+02 9.192416381835937500e+01 -5.546508789062500000e+00 5.377629995346069336e-01 8.235294222831726074e-01 1.503787353515625000e+03
6.800000000000000000e+01 4.387384615384614790e+02 1.028736877441406250e+02 -6.438598632812500000e+00 6.752655506134033203e-01 7.647058963775634766e-01 1.420518554687500000e+03
3.000000000000000000e+00 3.908384615384614449e+02 1.436979827880859375e+02 -9.292480468750000000e+00 8.190568685531616211e-01 9.411764740943908691e-01 1.703676147460937500e+03
1.300000000000000000e+01 3.909769230769230717e+02 1.535739746093750000e+02 -9.196838378906250000e+00 5.815082788467407227e-01 0.000000000000000000e+00 1.621995239257812500e+03
3.000000000000000000e+00 4.104692307692308191e+02 1.556939849853515625e+02 -8.839965820312500000e+00 6.071496009826660156e-01 5.882353186607360840e-01 1.807516601562500000e+03
3.300000000000000000e+01 5.799461538461539476e+02 1.790647277832031250e+02 -7.220642089843750000e+00 6.916593313217163086e-01 5.882352963089942932e-02 1.828426391601562500e+03
1.000000000000000000e+01 7.032076923076921275e+02 1.891467437744140625e+02 -6.315063476562500000e+00 7.063109874725341797e-01 0.000000000000000000e+00 1.912648071289062500e+03
3.900000000000000000e+01 7.907538461538466663e+02 2.319980010986328125e+02 -5.409454345703125000e+00 4.504609704017639160e-01 2.941176593303680420e-01 1.589603149414062500e+03
1.400000000000000000e+01 8.904153846153844825e+02 2.892560729980468750e+02 -4.570251464843750000e+00 8.879687190055847168e-01 2.941176593303680420e-01 1.905769775390625000e+03
6.000000000000000000e+00 9.044538461538458023e+02 3.146301879882812500e+02 -3.930297851562500000e+00 6.200247406959533691e-01 2.352941185235977173e-01 1.760496826171875000e+03
1.100000000000000000e+01 7.858230769230768828e+02 2.811379394531250000e+02 -3.290344238281250000e+00 4.206232726573944092e-01 2.941176593303680420e-01 1.675269897460937500e+03
2.700000000000000000e+01 6.975692307692308987e+02 2.631295776367187500e+02 -2.650390625000000000e+00 9.999999776482582092e-03 0.000000000000000000e+00 1.167395874023437500e+03
2.200000000000000000e+01 6.480769230769227534e+02 2.378558197021484375e+02 -2.333374023437500000e+00 3.918662071228027344e-01 5.882352963089942932e-02 1.670003662109375000e+03
5.800000000000000000e+01 5.623076923076922640e+02 1.867181854248046875e+02 -2.339233398437500000e+00 1.815850287675857544e-01 5.294117927551269531e-01 9.582424926757812500e+02
3.600000000000000000e+01 4.711692307692308077e+02 1.350216979980468750e+02 -2.345092773437500000e+00 1.671469509601593018e-01 1.941176414489746094e+00 9.933687744140625000e+02
2.400000000000000000e+01 4.106999999999997613e+02 1.113162231445312500e+02 -2.350982666015625000e+00 9.999999776482582092e-03 1.705882310867309570e+00 7.189617919921875000e+02
2.600000000000000000e+01 3.711538461538460183e+02 1.242559280395507812e+02 -2.848999023437500000e+00 9.999999776482582092e-03 1.764705896377563477e+00 8.677852783203125000e+02
4.000000000000000000e+00 3.691769230769230035e+02 1.449957275390625000e+02 -3.511047363281250000e+00 1.285590976476669312e-01 7.058823704719543457e-01 7.938899536132812500e+02
2.800000000000000000e+01 3.853846153846153015e+02 1.766219940185546875e+02 -4.835174560546875000e+00 2.792116701602935791e-01 1.647058844566345215e+00 9.506152343750000000e+02
6.500000000000000000e+01 3.945384615384615472e+02 1.754108886718750000e+02 -5.211730957031250000e+00 1.624734252691268921e-01 6.470588445663452148e-01 9.119131469726562500e+02
6.100000000000000000e+01 4.049692307692307054e+02 1.646751403808593750e+02 -5.588256835937500000e+00 2.660194635391235352e-01 1.352941155433654785e+00 1.012737976074218750e+03
3.200000000000000000e+01 4.068538461538463480e+02 1.629289855957031250e+02 -5.964782714843750000e+00 2.979587018489837646e-01 1.529411792755126953e+00 1.047947509765625000e+03
6.900000000000000000e+01 4.007153846153847212e+02 1.566788024902343750e+02 -6.193115234375000000e+00 1.964216977357864380e-01 2.117647171020507812e+00 9.478109741210937500e+02
5.900000000000000000e+01 3.838076923076924913e+02 1.381180419921875000e+02 -5.976867675781250000e+00 3.111229240894317627e-01 2.352941274642944336e+00 1.141766235351562500e+03
2.400000000000000000e+01 3.660307692307690672e+02 1.159728546142578125e+02 -5.760650634765625000e+00 2.855178415775299072e-01 1.647058844566345215e+00 1.171261474609375000e+03
1.400000000000000000e+01 3.398615384615383732e+02 9.987052917480468750e+01 -5.182312011718750000e+00 2.860769033432006836e-01 2.411764621734619141e+00 1.016773071289062500e+03
2.500000000000000000e+01 3.248307692307691923e+02 1.076130294799804688e+02 -4.674407958984375000e+00 1.828077286481857300e-01 1.882352948188781738e+00 8.661132202148437500e+02
2.300000000000000000e+01 3.219615384615384528e+02 1.126484909057617188e+02 -4.166503906250000000e+00 1.613391488790512085e-01 2.352941274642944336e+00 8.983314819335937500e+02
1.900000000000000000e+01 3.207769230769229694e+02 1.148400726318359375e+02 -3.658599853515625000e+00 1.837021261453628540e-01 2.647058725357055664e+00 9.181990356445312500e+02
2.000000000000000000e+00 3.186538461538461320e+02 1.212433013916015625e+02 -3.147094726562500000e+00 1.177706718444824219e-01 9.411764740943908691e-01 7.333033447265625000e+02
6.000000000000000000e+00 3.158846153846153015e+02 1.176685791015625000e+02 -2.927368164062500000e+00 1.412146240472793579e-01 1.647058844566345215e+00 6.481276855468750000e+02
3.100000000000000000e+01 3.350461538461540272e+02 1.420302429199218750e+02 -2.928100585937500000e+00 5.295239090919494629e-01 1.705882310867309570e+00 1.108633911132812500e+03
2.600000000000000000e+01 3.428461538461537543e+02 1.602713317871093750e+02 -3.148529052734375000e+00 4.619493782520294189e-01 2.058823585510253906e+00 1.028536743164062500e+03
5.500000000000000000e+01 3.484230769230768487e+02 1.627013244628906250e+02 -3.368957519531250000e+00 5.508727431297302246e-01 1.529411792755126953e+00 1.096611328125000000e+03
9.000000000000000000e+00 3.493230769230766555e+02 1.633931427001953125e+02 -3.629516601562500000e+00 2.194320857524871826e-01 2.176470518112182617e+00 7.698884277343750000e+02
5.700000000000000000e+01 3.598076923076920366e+02 1.542523956298828125e+02 -4.010528564453125000e+00 4.570082426071166992e-01 1.294117689132690430e+00 9.610789794921875000e+02
9.000000000000000000e+00 3.618692307692308532e+02 1.547481231689453125e+02 -4.391510009765625000e+00 1.861780136823654175e-01 2.058823585510253906e+00 6.780255737304687500e+02
5.800000000000000000e+01 3.946384615384616268e+02 1.715947570800781250e+02 -4.975585937500000000e+00 2.593333423137664795e-01 3.529411852359771729e-01 7.534154663085937500e+02
4.200000000000000000e+01 4.309307692307692150e+02 1.882186279296875000e+02 -5.025878906250000000e+00 4.348245561122894287e-01 0.000000000000000000e+00 9.330894775390625000e+02
1.500000000000000000e+01 4.393923076923077247e+02 1.910712738037109375e+02 -5.051025390625000000e+00 5.143293738365173340e-01 2.941176593303680420e-01 1.027692016601562500e+03
5.600000000000000000e+01 4.615846153846155744e+02 1.954454956054687500e+02 -4.834106445312500000e+00 7.659977078437805176e-01 0.000000000000000000e+00 1.090006835937500000e+03
5.100000000000000000e+01 4.728384615384615586e+02 1.986055755615234375e+02 -4.536499023437500000e+00 5.440986156463623047e-01 0.000000000000000000e+00 8.154194335937500000e+02
4.500000000000000000e+01 4.761307692307693742e+02 2.094775695800781250e+02 -4.238891601562500000e+00 5.780808925628662109e-01 5.882353186607360840e-01 9.614555053710937500e+02
4.700000000000000000e+01 4.932000000000001592e+02 2.124446716308593750e+02 -3.941284179687500000e+00 3.735125660896301270e-01 5.882353186607360840e-01 7.666165771484375000e+02
5.000000000000000000e+01 4.883461538461539249e+02 2.098620605468750000e+02 -3.602325439453125000e+00 3.286939859390258789e-01 0.000000000000000000e+00 7.014639282226562500e+02
1.800000000000000000e+01 4.780384615384615472e+02 2.001737518310546875e+02 -3.263336181640625000e+00 2.578332126140594482e-01 1.235294103622436523e+00 5.564312744140625000e+02
3.700000000000000000e+01 4.729923076923078042e+02 2.000269012451171875e+02 -2.924377441406250000e+00 1.713085770606994629e-01 1.470588207244873047e+00 4.307574768066406250e+02
4.300000000000000000e+01 4.747538461538463821e+02 2.032984313964843750e+02 -2.652221679687500000e+00 1.396148651838302612e-01 9.411764740943908691e-01 3.963483276367187500e+02
3.400000000000000000e+01 4.781538461538459615e+02 2.076536560058593750e+02 -2.580474853515625000e+00 1.464825272560119629e-01 1.176470637321472168e+00 4.328235168457031250e+02
3.900000000000000000e+01 4.803307692307693628e+02 2.091420593261718750e+02 -2.508758544921875000e+00 9.999999776482582092e-03 8.823529481887817383e-01 2.540669250488281250e+02
1.400000000000000000e+01 5.789461538461538339e+02 2.230289916992187500e+02 -2.841552734375000000e+00 9.999999776482582092e-03 1.764705896377563477e+00 1.465173034667968750e+02
2.500000000000000000e+01 6.127615384615381799e+02 2.259411621093750000e+02 -3.428710937500000000e+00 1.111032888293266296e-01 1.352941155433654785e+00 2.385034790039062500e+02
4.500000000000000000e+01 5.920307692307690104e+02 2.054122314453125000e+02 -3.802429199218750000e+00 1.212949156761169434e-01 9.411764740943908691e-01 2.242203674316406250e+02
2.700000000000000000e+01 5.901692307692309214e+02 1.736110076904296875e+02 -4.202819824218750000e+00 1.180654689669609070e-01 1.000000000000000000e+00 2.542053680419921875e+02
5.200000000000000000e+01 6.121923076923075087e+02 1.384963989257812500e+02 -4.603210449218750000e+00 1.544277369976043701e-01 1.000000000000000000e+00 4.117435302734375000e+02
6.600000000000000000e+01 6.366153846153848690e+02 1.119454650878906250e+02 -5.003631591796875000e+00 5.888076424598693848e-01 0.000000000000000000e+00 7.347238769531250000e+02
6.200000000000000000e+01 6.582615384615382936e+02 1.053207397460937500e+02 -5.287628173828125000e+00 4.902884364128112793e-01 6.470588445663452148e-01 7.292231445312500000e+02
4.100000000000000000e+01 6.686230769230771784e+02 1.311410064697265625e+02 -5.571655273437500000e+00 3.163025081157684326e-01 7.058823704719543457e-01 6.144934082031250000e+02
1.800000000000000000e+01 6.589846153846153811e+02 1.972373504638671875e+02 -5.855651855468750000e+00 2.744459211826324463e-01 1.529411792755126953e+00 4.198590087890625000e+02
6.400000000000000000e+01 6.696230769230769511e+02 2.669265136718750000e+02 -6.090454101562500000e+00 5.285382866859436035e-01 5.294117927551269531e-01 6.078588867187500000e+02
4.600000000000000000e+01 6.952846153846151083e+02 3.037868347167968750e+02 -6.177612304687500000e+00 7.946829795837402344e-01 1.764705926179885864e-01 1.045996459960937500e+03
1.100000000000000000e+01 6.888230769230768828e+02 3.076091308593750000e+02 -6.264770507812500000e+00 9.346061944961547852e-01 2.941176593303680420e-01 1.473925170898437500e+03
6.200000000000000000e+01 6.587153846153844370e+02 2.749969787597656250e+02 -6.351928710937500000e+00 2.477026134729385376e-01 5.882353186607360840e-01 3.540171508789062500e+02
2.000000000000000000e+01 6.405846153846151765e+02 2.593453369140625000e+02 -6.243530273437500000e+00 2.803852856159210205e-01 2.352941185235977173e-01 5.380675659179687500e+02
3.300000000000000000e+01 6.243076923076924913e+02 2.237757263183593750e+02 -5.939605712890625000e+00 1.691821515560150146e-01 0.000000000000000000e+00 3.240448913574218750e+02
3.800000000000000000e+01 5.949999999999998863e+02 1.619420471191406250e+02 -5.635681152343750000e+00 1.128413826227188110e-01 4.705882370471954346e-01 2.555354156494140625e+02
6.300000000000000000e+01 6.197076923076922412e+02 1.250981597900390625e+02 -4.953277587890625000e+00 1.286321282386779785e-01 5.882352963089942932e-02 1.748990783691406250e+02
6.300000000000000000e+01 6.858307692307688512e+02 1.324671630859375000e+02 -4.549926757812500000e+00 2.140548676252365112e-01 5.882352963089942932e-02 4.105921325683593750e+02
5.500000000000000000e+01 6.999769230769234127e+02 1.586349182128906250e+02 -4.146575927734375000e+00 1.431615501642227173e-01 5.882352963089942932e-02 3.052067565917968750e+02
4.700000000000000000e+01 6.985230769230768146e+02 1.970638580322265625e+02 -3.743225097656250000e+00 9.999999776482582092e-03 0.000000000000000000e+00 2.599325180053710938e+01
5.100000000000000000e+01 6.925000000000002274e+02 2.297397308349609375e+02 -3.326965332031250000e+00 9.999999776482582092e-03 1.000000000000000000e+00 2.056475677490234375e+02
1.100000000000000000e+01 6.867461538461539021e+02 2.338303070068359375e+02 -2.910675048828125000e+00 1.136187911033630371e-01 6.470588445663452148e-01 3.523974914550781250e+02
1.300000000000000000e+01 6.712384615384614790e+02 2.436824188232421875e+02 -2.494415283203125000e+00 9.999999776482582092e-03 0.000000000000000000e+00 1.543976898193359375e+02
5.900000000000000000e+01 7.052923076923075314e+02 2.965228271484375000e+02 -1.126434326171875000e+00 0.000000000000000000e+00 0.000000000000000000e+00 1.046656112670898438e+02
5.000000000000000000e+01 7.213923076923075541e+02 3.151055908203125000e+02 -9.257202148437500000e-01 9.999999776482582092e-03 2.941176593303680420e-01 9.905254364013671875e+01
5.400000000000000000e+01 7.413461538461535838e+02 3.173229064941406250e+02 -8.491516113281250000e-01 9.999999776482582092e-03 2.941176593303680420e-01 2.185579833984375000e+02
4.300000000000000000e+01 7.331461538461541068e+02 4.012570495605468750e+02 2.086914062500000000e+00 0.000000000000000000e+00 0.000000000000000000e+00 1.354856414794921875e+02
5.400000000000000000e+01 2.232200000000001182e+03 2.973839416503906250e+02 4.575317382812500000e+00 0.000000000000000000e+00 0.000000000000000000e+00 8.418273162841796875e+01
2.000000000000000000e+01 2.035807692307692832e+03 2.376932373046875000e+02 3.881134033203125000e+00 0.000000000000000000e+00 0.000000000000000000e+00 1.238278198242187500e+03
5.700000000000000000e+01 1.803138461538460888e+03 1.679058837890625000e+02 3.186920166015625000e+00 0.000000000000000000e+00 0.000000000000000000e+00 8.344835205078125000e+02
4.600000000000000000e+01 1.543084615384614608e+03 1.572170715332031250e+02 2.492736816406250000e+00 0.000000000000000000e+00 0.000000000000000000e+00 1.075796630859375000e+03
1.000000000000000000e+00 1.339523076923076587e+03 1.394410400390625000e+02 1.571838378906250000e+00 0.000000000000000000e+00 0.000000000000000000e+00 1.513331665039062500e+03
3.000000000000000000e+01 8.828384615384610470e+02 2.485818481445312500e+02 -1.417572021484375000e+00 0.000000000000000000e+00 0.000000000000000000e+00 1.728789306640625000e+03
1.500000000000000000e+01 6.653769230769229353e+02 2.565527038574218750e+02 -1.572570800781250000e+00 9.999999776482582092e-03 5.882352963089942932e-02 1.566042114257812500e+03
2.300000000000000000e+01 4.717923076923079293e+02 2.155536346435546875e+02 -1.650054931640625000e+00 0.000000000000000000e+00 0.000000000000000000e+00 1.163367431640625000e+03
2.500000000000000000e+01 4.644307692307692719e+02 1.876870422363281250e+02 -1.798126220703125000e+00 0.000000000000000000e+00 0.000000000000000000e+00 1.213621582031250000e+03
2.000000000000000000e+01 4.108384615384613880e+02 1.727353057861328125e+02 -2.157897949218750000e+00 0.000000000000000000e+00 0.000000000000000000e+00 1.050169921875000000e+03
4.200000000000000000e+01 5.567230769230766327e+02 1.496438446044921875e+02 -2.517639160156250000e+00 0.000000000000000000e+00 0.000000000000000000e+00 1.281846557617187500e+03
6.600000000000000000e+01 6.014538461538460297e+02 1.518734588623046875e+02 -2.877380371093750000e+00 0.000000000000000000e+00 2.352941185235977173e-01 1.013475097656250000e+03
6.500000000000000000e+01 8.404769230769232990e+02 2.063159027099609375e+02 -3.147186279296875000e+00 9.999999776482582092e-03 4.705882370471954346e-01 1.268730224609375000e+03
4.100000000000000000e+01 9.978538461538457796e+02 2.982583007812500000e+02 -3.327056884765625000e+00 0.000000000000000000e+00 8.235294222831726074e-01 1.388623413085937500e+03
2.000000000000000000e+00 1.273753846153847007e+03 3.682662353515625000e+02 -3.506896972656250000e+00 0.000000000000000000e+00 2.352941185235977173e-01 1.850737426757812500e+03
5.800000000000000000e+01 1.538015384615384846e+03 4.152237243652343750e+02 -3.686767578125000000e+00 0.000000000000000000e+00 3.529411852359771729e-01 9.912733154296875000e+02
2.700000000000000000e+01 1.705415384615384710e+03 4.426423950195312500e+02 -3.623138427734375000e+00 3.739428818225860596e-01 0.000000000000000000e+00 1.922992797851562500e+03
6.200000000000000000e+01 1.033661538461538612e+03 2.759645385742187500e+02 -3.333526611328125000e+00 0.000000000000000000e+00 0.000000000000000000e+00 1.745875610351562500e+03
7.000000000000000000e+00 5.503846153846153584e+02 2.438097534179687500e+02 -1.616638183593750000e+00 0.000000000000000000e+00 0.000000000000000000e+00 1.301066162109375000e+03
4.000000000000000000e+00 4.661769230769231172e+02 1.960580596923828125e+02 -1.090911865234375000e+00 0.000000000000000000e+00 0.000000000000000000e+00 1.190620239257812500e+03
1.000000000000000000e+00 3.958461538461540385e+02 1.720839996337890625e+02 -5.601501464843750000e-01 0.000000000000000000e+00 0.000000000000000000e+00 9.847489013671875000e+02
5.000000000000000000e+00 3.314384615384615245e+02 1.132377090454101562e+02 9.370117187500000000e-01 0.000000000000000000e+00 0.000000000000000000e+00 7.559796752929687500e+02
5.000000000000000000e+00 3.036307692307693173e+02 1.095266265869140625e+02 1.277557373046875000e+00 0.000000000000000000e+00 0.000000000000000000e+00 7.641409301757812500e+02
5.000000000000000000e+00 2.766384615384615699e+02 1.041599502563476562e+02 1.618103027343750000e+00 0.000000000000000000e+00 0.000000000000000000e+00 7.762044067382812500e+02
5.000000000000000000e+00 2.875846153846154607e+02 1.027390136718750000e+02 1.958648681640625000e+00 0.000000000000000000e+00 0.000000000000000000e+00 7.695335083007812500e+02
5.000000000000000000e+00 2.968846153846154721e+02 1.002631683349609375e+02 2.049468994140625000e+00 0.000000000000000000e+00 0.000000000000000000e+00 7.397543945312500000e+02
0.000000000000000000e+00 3.058846153846154721e+02 1.034607238769531250e+02 2.057037353515625000e+00 0.000000000000000000e+00 0.000000000000000000e+00 6.877773437500000000e+02
1.000000000000000000e+00 3.123384615384617291e+02 1.133030548095703125e+02 2.064605712890625000e+00 0.000000000000000000e+00 0.000000000000000000e+00 6.787004394531250000e+02
0.000000000000000000e+00 3.096307692307690900e+02 1.381162567138671875e+02 1.814422607421875000e+00 0.000000000000000000e+00 2.941176593303680420e-01 6.359288330078125000e+02
9.000000000000000000e+00 3.202076923076923549e+02 1.541154022216796875e+02 1.556671142578125000e+00 0.000000000000000000e+00 0.000000000000000000e+00 5.722769165039062500e+02
7.000000000000000000e+00 5.523846153846159268e+02 1.564202880859375000e+02 -3.271484375000000000e-02 0.000000000000000000e+00 0.000000000000000000e+00 4.875391540527343750e+02
2.800000000000000000e+01 5.294615384615386802e+02 1.409288635253906250e+02 1.886901855468750000e-01 0.000000000000000000e+00 6.470588445663452148e-01 2.606536865234375000e+02
1.600000000000000000e+01 5.726692307692306940e+02 1.246135864257812500e+02 8.972167968750000000e-03 0.000000000000000000e+00 2.352941185235977173e-01 2.502437438964843750e+02
2.800000000000000000e+01 6.260076923076923094e+02 1.241432113647460938e+02 -1.170043945312500000e-01 0.000000000000000000e+00 6.470588445663452148e-01 2.389074859619140625e+02
5.700000000000000000e+01 6.254153846153843688e+02 1.393724975585937500e+02 -5.010375976562500000e-01 0.000000000000000000e+00 0.000000000000000000e+00 2.413105316162109375e+02
4.300000000000000000e+01 6.351461538461537657e+02 1.640330200195312500e+02 -6.930847167968750000e-01 0.000000000000000000e+00 0.000000000000000000e+00 2.854094543457031250e+02
5.600000000000000000e+01 6.547769230769227988e+02 2.084667205810546875e+02 -8.757019042968750000e-01 0.000000000000000000e+00 2.941176593303680420e-01 3.276743774414062500e+02
4.900000000000000000e+01 6.706076923076923322e+02 1.895970764160156250e+02 -1.055206298828125000e+00 0.000000000000000000e+00 0.000000000000000000e+00 3.514350891113281250e+02
6.700000000000000000e+01 6.913384615384618428e+02 1.711792907714843750e+02 -1.234680175781250000e+00 0.000000000000000000e+00 5.882352963089942932e-02 3.856307373046875000e+02
4.600000000000000000e+01 7.152692307692307168e+02 1.604683837890625000e+02 -1.414184570312500000e+00 0.000000000000000000e+00 5.294117927551269531e-01 3.799738159179687500e+02
7.000000000000000000e+01 7.790769230769229807e+02 1.904780883789062500e+02 -1.584594726562500000e+00 9.999999776482582092e-03 0.000000000000000000e+00 4.094635009765625000e+02
5.200000000000000000e+01 8.228153846153846871e+02 2.537701568603515625e+02 -1.777130126953125000e+00 9.999999776482582092e-03 5.882353186607360840e-01 3.911296081542968750e+02
6.500000000000000000e+01 8.333307692307694197e+02 2.186548461914062500e+02 -1.846557617187500000e+00 9.999999776482582092e-03 0.000000000000000000e+00 3.896529235839843750e+02
3.900000000000000000e+01 8.316461538461537657e+02 2.130954742431640625e+02 -1.894348144531250000e+00 9.999999776482582092e-03 5.882353186607360840e-01 3.691405029296875000e+02
6.100000000000000000e+01 8.017846153846153356e+02 2.102014465332031250e+02 -1.955261230468750000e+00 9.999999776482582092e-03 2.941176593303680420e-01 3.497615051269531250e+02
5.700000000000000000e+01 7.713538461538457796e+02 1.824176025390625000e+02 -2.016143798828125000e+00 9.999999776482582092e-03 2.941176593303680420e-01 3.575291137695312500e+02
5.800000000000000000e+01 7.245692307692308987e+02 1.327475433349609375e+02 -2.155578613281250000e+00 9.999999776482582092e-03 0.000000000000000000e+00 2.777590332031250000e+02
5.600000000000000000e+01 7.073000000000004093e+02 1.898613891601562500e+02 -2.324523925781250000e+00 9.999999776482582092e-03 0.000000000000000000e+00 2.375170288085937500e+02
6.100000000000000000e+01 6.884923076923076906e+02 2.223873443603515625e+02 -2.408996582031250000e+00 9.999999776482582092e-03 2.941176593303680420e-01 1.941662139892578125e+02
3.600000000000000000e+01 6.763076923076924913e+02 2.513284759521484375e+02 -2.430664062500000000e+00 9.999999776482582092e-03 0.000000000000000000e+00 1.719999694824218750e+02
5.900000000000000000e+01 6.729384615384616382e+02 2.918403930664062500e+02 -2.452301025390625000e+00 9.999999776482582092e-03 0.000000000000000000e+00 1.679907226562500000e+02
6.000000000000000000e+00 6.695923076923074859e+02 3.221781921386718750e+02 -2.473968505859375000e+00 9.999999776482582092e-03 0.000000000000000000e+00 1.385775451660156250e+02
7.000000000000000000e+00 6.581692307692306940e+02 3.330368041992187500e+02 -2.464294433593750000e+00 9.999999776482582092e-03 0.000000000000000000e+00 9.158667755126953125e+01
2.000000000000000000e+01 6.539923076923075769e+02 3.354939575195312500e+02 -2.360717773437500000e+00 9.999999776482582092e-03 5.882353186607360840e-01 9.502926635742187500e+01
5.200000000000000000e+01 6.581769230769230035e+02 3.379246520996093750e+02 -2.257110595703125000e+00 9.999999776482582092e-03 2.941176593303680420e-01 8.865423583984375000e+01
1.900000000000000000e+01 6.566846153846151992e+02 3.230321350097656250e+02 -2.153503417968750000e+00 9.999999776482582092e-03 0.000000000000000000e+00 1.016746139526367188e+02
1.500000000000000000e+01 6.533692307692307395e+02 3.103831787109375000e+02 -2.184265136718750000e+00 9.999999776482582092e-03 0.000000000000000000e+00 1.131838378906250000e+02
3.200000000000000000e+01 6.584615384615384528e+02 2.855939331054687500e+02 -2.514556884765625000e+00 9.999999776482582092e-03 0.000000000000000000e+00 4.066680526733398438e+01
6.200000000000000000e+01 6.566307692307692605e+02 2.793240966796875000e+02 -2.679718017578125000e+00 9.999999776482582092e-03 5.882352963089942932e-02 1.516192245483398438e+01
3.300000000000000000e+01 6.637615384615382936e+02 2.784973449707031250e+02 -2.582977294921875000e+00 9.999999776482582092e-03 5.294117927551269531e-01 7.461482048034667969e+00
1.200000000000000000e+01 6.830000000000000000e+02 2.851931457519531250e+02 -2.214935302734375000e+00 9.999999776482582092e-03 0.000000000000000000e+00 1.731661796569824219e+01
3.500000000000000000e+01 6.931076923076921048e+02 2.949723815917968750e+02 -2.030914306640625000e+00 9.999999776482582092e-03 0.000000000000000000e+00 3.332099914550781250e+01
4.900000000000000000e+01 7.248769230769229353e+02 3.076178894042968750e+02 -2.232513427734375000e+00 9.999999776482582092e-03 5.294117927551269531e-01 1.004303207397460938e+02
2.000000000000000000e+01 7.513000000000002956e+02 3.205462951660156250e+02 -2.434112548828125000e+00 1.099888533353805542e-01 6.470588445663452148e-01 2.157283630371093750e+02
2.100000000000000000e+01 7.662692307692310578e+02 3.313223266601562500e+02 -2.635711669921875000e+00 1.039507314562797546e-01 2.941176593303680420e-01 2.370303497314453125e+02
4.100000000000000000e+01 7.816538461538461888e+02 3.395469055175781250e+02 -2.837158203125000000e+00 1.126414835453033447e-01 2.941176593303680420e-01 2.621594238281250000e+02
5.500000000000000000e+01 8.121615384615383846e+02 3.603802795410156250e+02 -3.239166259765625000e+00 1.358046531677246094e-01 0.000000000000000000e+00 3.696444091796875000e+02
5.500000000000000000e+01 8.265538461538460524e+02 3.787266845703125000e+02 -3.440185546875000000e+00 1.238401085138320923e-01 7.058823704719543457e-01 3.234350585937500000e+02
3.900000000000000000e+01 8.395153846153843915e+02 3.906416625976562500e+02 -3.587951660156250000e+00 1.307751834392547607e-01 8.235294222831726074e-01 3.379307861328125000e+02
3.200000000000000000e+01 8.503153846153848008e+02 3.965531616210937500e+02 -3.682495117187500000e+00 1.279345005750656128e-01 8.235294222831726074e-01 3.731191711425781250e+02
6.300000000000000000e+01 9.345769230769232081e+02 1.901798248291015625e+02 -3.780456542968750000e+00 2.423627823591232300e-01 2.941176593303680420e-01 5.905162353515625000e+02
5.600000000000000000e+01 9.701846153846151992e+02 2.039952239990234375e+02 -3.683776855468750000e+00 1.903680115938186646e-01 6.470588445663452148e-01 5.521074218750000000e+02
2.600000000000000000e+01 1.021161538461538157e+03 2.597944641113281250e+02 -3.573852539062500000e+00 1.572481244802474976e-01 0.000000000000000000e+00 4.880938720703125000e+02
5.700000000000000000e+01 1.027653846153846189e+03 2.717658386230468750e+02 -3.522369384765625000e+00 1.480740904808044434e-01 0.000000000000000000e+00 4.583989257812500000e+02
5.700000000000000000e+01 1.049523076923076587e+03 2.980102233886718750e+02 -3.481414794921875000e+00 1.789456605911254883e-01 5.882353186607360840e-01 5.382864990234375000e+02
5.100000000000000000e+01 1.156546153846153857e+03 4.699890747070312500e+02 -3.325408935546875000e+00 2.735347449779510498e-01 0.000000000000000000e+00 6.462064819335937500e+02
5.700000000000000000e+01 1.067200000000000273e+03 4.742685241699218750e+02 -3.218261718750000000e+00 2.507760226726531982e-01 2.352941185235977173e-01 6.833673095703125000e+02
4.200000000000000000e+01 1.006192307692307395e+03 4.774152526855468750e+02 -3.111114501953125000e+00 1.699143052101135254e-01 0.000000000000000000e+00 4.299242553710937500e+02
4.300000000000000000e+01 9.528076923076921503e+02 4.680519104003906250e+02 -3.003967285156250000e+00 2.621402144432067871e-01 0.000000000000000000e+00 6.357659912109375000e+02
5.200000000000000000e+01 9.399461538461539476e+02 4.600708618164062500e+02 -2.852661132812500000e+00 1.599492281675338745e-01 3.529411852359771729e-01 5.574034423828125000e+02
7.100000000000000000e+01 1.017807692307692150e+03 4.525917053222656250e+02 -2.686614990234375000e+00 2.224744558334350586e-01 0.000000000000000000e+00 4.386161193847656250e+02
1.600000000000000000e+01 1.057361538461538430e+03 4.403173828125000000e+02 -2.520599365234375000e+00 4.069528579711914062e-01 0.000000000000000000e+00 8.348688354492187500e+02
4.600000000000000000e+01 1.035476923076922958e+03 4.255581054687500000e+02 -2.354583740234375000e+00 2.093195617198944092e-01 2.941176593303680420e-01 5.651628417968750000e+02
7.400000000000000000e+01 1.066176923076922776e+03 3.833960876464843750e+02 -1.725036621093750000e+00 1.824311912059783936e-01 0.000000000000000000e+00 4.649745178222656250e+02
7.200000000000000000e+01 1.022392307692308009e+03 4.033533325195312500e+02 -1.482330322265625000e+00 9.999999776482582092e-03 0.000000000000000000e+00 2.762698364257812500e+02
6.300000000000000000e+01 1.087761538461538521e+03 3.104854125976562500e+02 -7.998352050781250000e-01 9.999999776482582092e-03 0.000000000000000000e+00 3.548988647460937500e+02
4.200000000000000000e+01 1.104107692307692332e+03 1.793102264404296875e+02 -4.586181640625000000e-01 9.999999776482582092e-03 2.941176593303680420e-01 3.716044311523437500e+02
5.000000000000000000e+01 1.078446153846153720e+03 1.151971206665039062e+02 -2.210388183593750000e-01 9.999999776482582092e-03 0.000000000000000000e+00 2.605172424316406250e+02
5.400000000000000000e+01 1.082446153846153948e+03 1.639936981201171875e+02 -8.712768554687500000e-02 0.000000000000000000e+00 0.000000000000000000e+00 2.227319488525390625e+02
2.300000000000000000e+01 1.068861538461537521e+03 3.024832153320312500e+02 4.675292968750000000e-02 0.000000000000000000e+00 0.000000000000000000e+00 8.533444213867187500e+01
5.100000000000000000e+01 1.110053846153846280e+03 4.199204101562500000e+02 7.412414550781250000e-01 0.000000000000000000e+00 0.000000000000000000e+00 4.306690979003906250e+01
2.500000000000000000e+01 9.652384615384611379e+02 3.407691345214843750e+02 1.014785766601562500e+01 0.000000000000000000e+00 0.000000000000000000e+00 8.761086273193359375e+01
1.200000000000000000e+01 9.289846153846156085e+02 2.917979125976562500e+02 1.012402343750000000e+01 0.000000000000000000e+00 0.000000000000000000e+00 9.106877136230468750e+01
6.000000000000000000e+00 8.934615384615385665e+02 2.941946411132812500e+02 9.202667236328125000e+00 0.000000000000000000e+00 0.000000000000000000e+00 2.101824045181274414e+00
1.700000000000000000e+01 8.599692307692299664e+02 3.526584167480468750e+02 7.918914794921875000e+00 0.000000000000000000e+00 0.000000000000000000e+00 4.816983032226562500e+01
7.500000000000000000e+01 6.980000000000002274e+02 3.747609558105468750e+02 7.191131591796875000e+00 0.000000000000000000e+00 0.000000000000000000e+00 3.150507202148437500e+02
6.000000000000000000e+00 5.512230769230767464e+02 2.364379119873046875e+02 6.871673583984375000e+00 0.000000000000000000e+00 0.000000000000000000e+00 1.051608886718750000e+02
5.700000000000000000e+01 5.773461538461540385e+02 2.436005706787109375e+02 6.777832031250000000e+00 0.000000000000000000e+00 0.000000000000000000e+00 8.399404144287109375e+01
3.100000000000000000e+01 5.762153846153848917e+02 2.376473236083984375e+02 6.657104492187500000e+00 0.000000000000000000e+00 0.000000000000000000e+00 6.970940399169921875e+01
2.000000000000000000e+00 5.533230769230768828e+02 2.349088592529296875e+02 6.289672851562500000e+00 0.000000000000000000e+00 0.000000000000000000e+00 1.218929901123046875e+02
4.000000000000000000e+00 5.783923076923076678e+02 2.406787719726562500e+02 5.952148437500000000e+00 0.000000000000000000e+00 2.352941185235977173e-01 1.514141693115234375e+02
1.800000000000000000e+01 6.473153846153843460e+02 2.639740905761718750e+02 5.269378662109375000e+00 0.000000000000000000e+00 0.000000000000000000e+00 1.447810363769531250e+02
2.200000000000000000e+01 6.574692307692312170e+02 3.011318359375000000e+02 5.380462646484375000e+00 0.000000000000000000e+00 1.117647051811218262e+00 1.114864273071289062e+02
5.000000000000000000e+00 6.335846153846157449e+02 2.762612304687500000e+02 4.821655273437500000e+00 0.000000000000000000e+00 1.058823585510253906e+00 1.166885604858398438e+02
8.000000000000000000e+00 6.304538461538461434e+02 2.762311401367187500e+02 4.665954589843750000e+00 0.000000000000000000e+00 7.647058963775634766e-01 1.410129089355468750e+02
9.000000000000000000e+00 5.944769230769231854e+02 2.579734191894531250e+02 4.198242187500000000e+00 0.000000000000000000e+00 1.294117689132690430e+00 1.912758331298828125e+02
6.000000000000000000e+00 5.346846153846154266e+02 2.172947845458984375e+02 3.980346679687500000e+00 0.000000000000000000e+00 1.647058844566345215e+00 1.551537628173828125e+02
7.000000000000000000e+00 4.790999999999998522e+02 1.972571716308593750e+02 3.856719970703125000e+00 0.000000000000000000e+00 1.411764740943908691e+00 1.814107055664062500e+02
1.200000000000000000e+01 4.622461538461539590e+02 1.892171478271484375e+02 3.987792968750000000e+00 0.000000000000000000e+00 2.058823585510253906e+00 1.475021839141845703e+01
1.000000000000000000e+00 4.356999999999998181e+02 1.391823730468750000e+02 4.374511718750000000e+00 0.000000000000000000e+00 2.176470518112182617e+00 6.248440170288085938e+01
1.000000000000000000e+00 4.286230769230770079e+02 1.241163406372070312e+02 4.146423339843750000e+00 0.000000000000000000e+00 2.176470518112182617e+00 7.762790679931640625e+01
1.000000000000000000e+00 4.269153846153846530e+02 1.296203918457031250e+02 4.013824462890625000e+00 0.000000000000000000e+00 2.000000000000000000e+00 1.274181442260742188e+02
1.000000000000000000e+00 4.253846153846151878e+02 1.359612731933593750e+02 3.881225585937500000e+00 0.000000000000000000e+00 1.941176414489746094e+00 9.456037139892578125e+01
5.000000000000000000e+00 3.773307692307689649e+02 1.525998992919921875e+02 2.753173828125000000e+00 0.000000000000000000e+00 1.941176414489746094e+00 1.038152084350585938e+02
1.000000000000000000e+01 3.380846153846154607e+02 1.797304840087890625e+02 1.630065917968750000e+00 0.000000000000000000e+00 1.352941155433654785e+00 4.753419494628906250e+02
1.000000000000000000e+00 3.105461538461537998e+02 1.231309280395507812e+02 1.505187988281250000e+00 0.000000000000000000e+00 1.352941155433654785e+00 3.481019592285156250e+02
0.000000000000000000e+00 2.669461538461538339e+02 8.429449462890625000e+01 2.434051513671875000e+00 0.000000000000000000e+00 1.823529362678527832e+00 1.445031433105468750e+02
0.000000000000000000e+00 2.653076923076921503e+02 8.626862335205078125e+01 2.473724365234375000e+00 0.000000000000000000e+00 2.588235378265380859e+00 1.779345245361328125e+02
0.000000000000000000e+00 2.596230769230770079e+02 8.766403961181640625e+01 2.422485351562500000e+00 0.000000000000000000e+00 1.764705896377563477e+00 2.410747680664062500e+02
1.000000000000000000e+00 2.669153846153846530e+02 1.136248703002929688e+02 1.852386474609375000e+00 0.000000000000000000e+00 2.529411792755126953e+00 2.761568603515625000e+02
0.000000000000000000e+00 2.863923076923076678e+02 1.233484954833984375e+02 1.633117675781250000e+00 0.000000000000000000e+00 2.823529481887817383e+00 2.901663208007812500e+02
2.000000000000000000e+00 2.993153846153848008e+02 1.261184539794921875e+02 1.559936523437500000e+00 0.000000000000000000e+00 2.176470518112182617e+00 3.052590332031250000e+02
1.000000000000000000e+00 3.183615384615385437e+02 1.315579986572265625e+02 1.413635253906250000e+00 0.000000000000000000e+00 1.235294103622436523e+00 4.134083251953125000e+02
0.000000000000000000e+00 3.250846153846152902e+02 1.339744567871093750e+02 1.377624511718750000e+00 0.000000000000000000e+00 3.000000000000000000e+00 3.231649475097656250e+02
0.000000000000000000e+00 3.278076923076921503e+02 1.404985656738281250e+02 1.305603027343750000e+00 0.000000000000000000e+00 2.705882310867309570e+00 2.808335876464843750e+02
2.000000000000000000e+00 3.321692307692307509e+02 1.393577880859375000e+02 1.278106689453125000e+00 0.000000000000000000e+00 1.941176414489746094e+00 3.813604125976562500e+02
4.000000000000000000e+00 3.270769230769231513e+02 1.373931427001953125e+02 1.276062011718750000e+00 0.000000000000000000e+00 2.176470518112182617e+00 2.719046325683593750e+02
1.000000000000000000e+00 3.116615384615384414e+02 1.326285247802734375e+02 1.274017333984375000e+00 0.000000000000000000e+00 1.823529362678527832e+00 2.785978698730468750e+02
2.000000000000000000e+00 3.019846153846155516e+02 1.234035186767578125e+02 1.272003173828125000e+00 0.000000000000000000e+00 2.117647171020507812e+00 2.351944732666015625e+02
3.000000000000000000e+00 2.760076923076922526e+02 1.066217956542968750e+02 1.304840087890625000e+00 0.000000000000000000e+00 1.647058844566345215e+00 1.693652648925781250e+02
0.000000000000000000e+00 2.683000000000000114e+02 1.072272109985351562e+02 1.327392578125000000e+00 0.000000000000000000e+00 1.411764740943908691e+00 1.295467224121093750e+02
1.000000000000000000e+00 2.613846153846153015e+02 1.067294616699218750e+02 1.349975585937500000e+00 0.000000000000000000e+00 2.058823585510253906e+00 1.339822082519531250e+02
0.000000000000000000e+00 2.565384615384614904e+02 1.031797256469726562e+02 1.399841308593750000e+00 0.000000000000000000e+00 2.352941274642944336e+00 1.292714080810546875e+02
0.000000000000000000e+00 2.647461538461538453e+02 9.884125518798828125e+01 1.458770751953125000e+00 0.000000000000000000e+00 1.764705896377563477e+00 1.423570251464843750e+02
0.000000000000000000e+00 2.653384615384615017e+02 9.790415954589843750e+01 1.517730712890625000e+00 0.000000000000000000e+00 1.588235259056091309e+00 1.651462249755859375e+02
1.200000000000000000e+01 2.754769230769229580e+02 1.038252105712890625e+02 1.576690673828125000e+00 0.000000000000000000e+00 1.470588207244873047e+00 1.610600585937500000e+02
3.600000000000000000e+01 2.872000000000000455e+02 1.151508407592773438e+02 1.639556884765625000e+00 0.000000000000000000e+00 2.352941185235977173e-01 1.574525604248046875e+02
7.000000000000000000e+00 3.126307692307692605e+02 1.315957489013671875e+02 1.702453613281250000e+00 0.000000000000000000e+00 9.411764740943908691e-01 1.583428802490234375e+02
2.500000000000000000e+01 3.457000000000001023e+02 1.480480346679687500e+02 1.765350341796875000e+00 0.000000000000000000e+00 8.823529481887817383e-01 1.894695587158203125e+02
2.300000000000000000e+01 3.813692307692306258e+02 1.510499572753906250e+02 1.776947021484375000e+00 0.000000000000000000e+00 5.882352963089942932e-02 2.279155273437500000e+02
6.000000000000000000e+00 5.600615384615385892e+02 1.972349548339843750e+02 5.447082519531250000e-01 0.000000000000000000e+00 2.000000000000000000e+00 3.896643371582031250e+02
6.700000000000000000e+01 5.740461538461540840e+02 2.029824829101562500e+02 5.505371093750000000e-02 9.999999776482582092e-03 2.176470518112182617e+00 7.511951904296875000e+02
1.000000000000000000e+01 5.548384615384616154e+02 2.127283630371093750e+02 -1.138977050781250000e+00 0.000000000000000000e+00 1.470588207244873047e+00 6.721376342773437500e+02
6.400000000000000000e+01 5.399846153846153811e+02 2.161743011474609375e+02 -1.914916992187500000e+00 9.999999776482582092e-03 2.941176593303680420e-01 8.752377929687500000e+02
4.800000000000000000e+01 5.236384615384615699e+02 2.257470092773437500e+02 -2.690887451171875000e+00 9.999999776482582092e-03 4.705882370471954346e-01 5.625510253906250000e+02
6.400000000000000000e+01 5.056538461538461320e+02 2.386614990234375000e+02 -3.466827392578125000e+00 9.999999776482582092e-03 0.000000000000000000e+00 8.069033203125000000e+02
3.500000000000000000e+01 4.935999999999999659e+02 2.640507507324218750e+02 -4.127716064453125000e+00 0.000000000000000000e+00 0.000000000000000000e+00 5.525800781250000000e+02
5.500000000000000000e+01 4.928999999999998636e+02 2.782516784667968750e+02 -4.788574218750000000e+00 0.000000000000000000e+00 0.000000000000000000e+00 7.498973999023437500e+02
6.100000000000000000e+01 4.972307692307691696e+02 2.801436767578125000e+02 -5.449432373046875000e+00 1.849697828292846680e-01 0.000000000000000000e+00 1.033928466796875000e+03
1.200000000000000000e+01 5.034846153846152674e+02 2.701213073730468750e+02 -5.969421386718750000e+00 7.462147474288940430e-01 0.000000000000000000e+00 1.471941528320312500e+03
1.700000000000000000e+01 5.149076923076922867e+02 2.559124298095703125e+02 -6.066772460937500000e+00 6.896453499794006348e-01 0.000000000000000000e+00 1.665563354492187500e+03
2.600000000000000000e+01 4.896615384615384414e+02 1.573541717529296875e+02 -5.021728515625000000e+00 7.932102680206298828e-01 2.941176593303680420e-01 1.583727905273437500e+03
2.900000000000000000e+01 4.910692307692307850e+02 1.495362396240234375e+02 -4.506378173828125000e+00 4.340375363826751709e-01 2.352941185235977173e-01 1.383427978515625000e+03
3.900000000000000000e+01 5.885846153846154039e+02 1.466526947021484375e+02 -4.187164306640625000e+00 5.922490954399108887e-01 3.529411852359771729e-01 1.269593383789062500e+03
2.800000000000000000e+01 6.843692307692309669e+02 1.492640686035156250e+02 -3.933349609375000000e+00 7.345418930053710938e-01 3.529411852359771729e-01 1.483686279296875000e+03
4.700000000000000000e+01 6.762461538461537884e+02 1.396671905517578125e+02 -3.679504394531250000e+00 4.930472671985626221e-01 9.411764740943908691e-01 1.558729248046875000e+03
3.400000000000000000e+01 6.690461538461538566e+02 1.193307952880859375e+02 -3.425659179687500000e+00 3.861007392406463623e-01 1.176470637321472168e+00 1.457522216796875000e+03
2.000000000000000000e+00 6.217846153846155630e+02 1.007446670532226562e+02 -3.608734130859375000e+00 9.999999776482582092e-03 1.000000000000000000e+00 8.557717285156250000e+02
2.600000000000000000e+01 5.894153846153848235e+02 9.858200073242187500e+01 -3.791809082031250000e+00 3.113014698028564453e-01 5.294117927551269531e-01 1.212153076171875000e+03
7.000000000000000000e+01 5.367615384615379526e+02 1.070703582763671875e+02 -3.974884033203125000e+00 2.842276692390441895e-01 1.588235259056091309e+00 1.347112792968750000e+03
6.800000000000000000e+01 5.045999999999998522e+02 1.033274383544921875e+02 -4.328247070312500000e+00 4.040368497371673584e-01 0.000000000000000000e+00 1.373094604492187500e+03
2.300000000000000000e+01 4.918769230769231058e+02 1.027532806396484375e+02 -5.192504882812500000e+00 8.893352746963500977e-01 0.000000000000000000e+00 1.876892089843750000e+03
5.200000000000000000e+01 4.672923076923075882e+02 1.080703887939453125e+02 -6.056732177734375000e+00 7.966624498367309570e-01 3.529411852359771729e-01 1.741213012695312500e+03
5.400000000000000000e+01 4.570307692307691241e+02 1.161821670532226562e+02 -6.920989990234375000e+00 7.312788963317871094e-01 3.529411852359771729e-01 1.772498046875000000e+03
4.600000000000000000e+01 4.632384615384618201e+02 1.316135406494140625e+02 -7.659515380859375000e+00 9.088222384452819824e-01 0.000000000000000000e+00 1.833677368164062500e+03
2.600000000000000000e+01 6.011846153846156540e+02 1.854322204589843750e+02 -7.205993652343750000e+00 6.889749765396118164e-01 6.470588445663452148e-01 1.436913696289062500e+03
1.900000000000000000e+01 6.397230769230772012e+02 1.868453674316406250e+02 -6.262298583984375000e+00 1.180338561534881592e-01 1.117647051811218262e+00 8.264138793945312500e+02
1.300000000000000000e+01 7.216923076923077360e+02 2.120416870117187500e+02 -5.318634033203125000e+00 9.999999776482582092e-03 1.176470637321472168e+00 8.229839477539062500e+02
2.600000000000000000e+01 8.563307692307687375e+02 2.674738769531250000e+02 -4.447784423828125000e+00 9.999999776482582092e-03 1.352941155433654785e+00 7.411729125976562500e+02
5.700000000000000000e+01 8.291538461538463025e+02 2.538170013427734375e+02 -3.795318603515625000e+00 1.305522024631500244e-01 9.411764740943908691e-01 7.676051635742187500e+02
7.200000000000000000e+01 4.810000000000000000e+02 1.791943817138671875e+02 -2.021942138671875000e+00 1.494527906179428101e-01 5.882353186607360840e-01 9.045238037109375000e+02
6.200000000000000000e+01 4.441153846153846985e+02 1.476635589599609375e+02 -1.964996337890625000e+00 4.068632423877716064e-01 2.941176593303680420e-01 1.234074707031250000e+03
3.600000000000000000e+01 3.537538461538460979e+02 1.441533508300781250e+02 -4.009613037109375000e+00 9.999999776482582092e-03 1.588235259056091309e+00 6.278112792968750000e+02
3.000000000000000000e+01 3.778769230769230489e+02 1.582070770263671875e+02 -4.758270263671875000e+00 1.706103086471557617e-01 1.352941155433654785e+00 8.360113525390625000e+02
5.400000000000000000e+01 3.904384615384617518e+02 1.472261657714843750e+02 -5.215576171875000000e+00 1.904024630784988403e-01 1.000000000000000000e+00 8.164403686523437500e+02
2.300000000000000000e+01 3.927230769230769170e+02 1.401481475830078125e+02 -6.130187988281250000e+00 1.281798630952835083e-01 2.058823585510253906e+00 7.600396728515625000e+02
2.700000000000000000e+01 3.990461538461538566e+02 1.452324829101562500e+02 -6.436157226562500000e+00 2.585662007331848145e-01 1.882352948188781738e+00 9.565738525390625000e+02
1.800000000000000000e+01 3.894692307692309328e+02 1.351614837646484375e+02 -6.288024902343750000e+00 2.905383706092834473e-01 1.470588207244873047e+00 1.068510620117187500e+03
1.300000000000000000e+01 3.506307692307694310e+02 1.090405731201171875e+02 -5.681030273437500000e+00 3.901109993457794189e-01 2.647058725357055664e+00 1.049221435546875000e+03
1.100000000000000000e+01 3.344461538461539476e+02 1.083941345214843750e+02 -5.207580566406250000e+00 2.333937734365463257e-01 2.294117689132690430e+00 1.002988098144531250e+03
1.800000000000000000e+01 3.381692307692307509e+02 1.084201126098632812e+02 -4.260650634765625000e+00 2.026125788688659668e-01 1.823529362678527832e+00 8.471075439453125000e+02
9.000000000000000000e+00 3.351384615384616836e+02 1.173148193359375000e+02 -3.739746093750000000e+00 1.626006364822387695e-01 1.529411792755126953e+00 7.009479980468750000e+02
5.100000000000000000e+01 3.400615384615385892e+02 1.241341781616210938e+02 -3.279663085937500000e+00 2.901277244091033936e-01 1.117647051811218262e+00 7.660749511718750000e+02
6.000000000000000000e+01 3.513461538461538680e+02 1.393933868408203125e+02 -3.472778320312500000e+00 4.562067985534667969e-01 1.058823585510253906e+00 8.938757934570312500e+02
8.000000000000000000e+00 3.583769230769231626e+02 1.470434875488281250e+02 -3.665863037109375000e+00 1.907510459423065186e-01 1.470588207244873047e+00 7.196192626953125000e+02
4.900000000000000000e+01 3.640769230769229807e+02 1.562121276855468750e+02 -3.858978271484375000e+00 3.497788012027740479e-01 6.470588445663452148e-01 8.125583496093750000e+02
4.500000000000000000e+01 3.726846153846151424e+02 1.626768646240234375e+02 -4.086639404296875000e+00 3.556795418262481689e-01 8.235294222831726074e-01 8.284747924804687500e+02
3.100000000000000000e+01 3.803076923076923208e+02 1.757339019775390625e+02 -4.418029785156250000e+00 5.502527356147766113e-01 1.117647051811218262e+00 9.217335205078125000e+02
4.700000000000000000e+01 3.800307692307693515e+02 1.863711242675781250e+02 -4.749420166015625000e+00 5.814755558967590332e-01 1.411764740943908691e+00 9.487619018554687500e+02
2.500000000000000000e+01 3.860999999999999659e+02 1.916463012695312500e+02 -5.080810546875000000e+00 2.907604873180389404e-01 1.470588207244873047e+00 7.675749511718750000e+02
2.000000000000000000e+01 3.938307692307692491e+02 1.963726501464843750e+02 -5.246826171875000000e+00 1.862252652645111084e-01 7.058823704719543457e-01 5.947574462890625000e+02
6.200000000000000000e+01 4.121307692307693742e+02 2.043262329101562500e+02 -5.247436523437500000e+00 5.561034083366394043e-01 2.352941185235977173e-01 9.011383056640625000e+02
5.300000000000000000e+01 4.236230769230771784e+02 2.118727569580078125e+02 -5.248046875000000000e+00 4.641496241092681885e-01 0.000000000000000000e+00 8.130234985351562500e+02
4.600000000000000000e+01 4.410923076923075428e+02 2.173047027587890625e+02 -5.248657226562500000e+00 4.885019361972808838e-01 5.882353186607360840e-01 7.627838745117187500e+02
2.100000000000000000e+01 4.602230769230766896e+02 2.209103240966796875e+02 -5.027801513671875000e+00 4.699898362159729004e-01 5.294117927551269531e-01 8.860252685546875000e+02
3.500000000000000000e+01 4.716999999999999318e+02 2.290839538574218750e+02 -4.733123779296875000e+00 8.416699171066284180e-01 5.882353186607360840e-01 1.107417480468750000e+03
4.500000000000000000e+01 4.776692307692307509e+02 2.250988311767578125e+02 -4.438476562500000000e+00 6.933671832084655762e-01 0.000000000000000000e+00 1.043208374023437500e+03
4.300000000000000000e+01 4.885769230769230944e+02 2.249024810791015625e+02 -4.143798828125000000e+00 6.428090929985046387e-01 2.941176593303680420e-01 9.552661743164062500e+02
1.700000000000000000e+01 4.923846153846152447e+02 2.157295532226562500e+02 -3.804718017578125000e+00 4.728175401687622070e-01 5.882352963089942932e-02 7.074553222656250000e+02
5.600000000000000000e+01 4.841076923076922753e+02 2.034569702148437500e+02 -3.465667724609375000e+00 5.441057682037353516e-01 5.882352963089942932e-02 7.394725952148437500e+02
4.700000000000000000e+01 4.777461538461541295e+02 1.893168334960937500e+02 -3.126617431640625000e+00 2.788366377353668213e-01 0.000000000000000000e+00 4.108947753906250000e+02
5.200000000000000000e+01 4.663846153846155289e+02 1.931362609863281250e+02 -2.857879638671875000e+00 1.743913441896438599e-01 5.882353186607360840e-01 4.217527160644531250e+02
5.100000000000000000e+01 4.655615384615384755e+02 1.969228668212890625e+02 -2.800170898437500000e+00 1.173414438962936401e-01 8.823529481887817383e-01 3.075881042480468750e+02
3.200000000000000000e+01 4.693615384615382595e+02 2.019284515380859375e+02 -2.742462158203125000e+00 9.999999776482582092e-03 1.705882310867309570e+00 2.397966766357421875e+02
4.300000000000000000e+01 5.130538461538461661e+02 2.130788574218750000e+02 -2.684753417968750000e+00 1.130589991807937622e-01 1.529411792755126953e+00 2.642817077636718750e+02
2.600000000000000000e+01 5.859692307692309896e+02 2.240417938232421875e+02 -3.099578857421875000e+00 1.080768480896949768e-01 1.647058844566345215e+00 2.374523315429687500e+02
4.100000000000000000e+01 6.134153846153848235e+02 2.282456207275390625e+02 -3.395385742187500000e+00 1.087805330753326416e-01 8.823529481887817383e-01 2.241285247802734375e+02
2.800000000000000000e+01 6.041769230769230035e+02 2.199878540039062500e+02 -3.691192626953125000e+00 1.181105524301528931e-01 1.470588207244873047e+00 2.075260772705078125e+02
2.800000000000000000e+01 5.837000000000000455e+02 2.056393890380859375e+02 -4.077667236328125000e+00 1.480513811111450195e-01 1.058823585510253906e+00 2.287081146240234375e+02
1.800000000000000000e+01 5.807384615384618201e+02 1.948124542236328125e+02 -4.494415283203125000e+00 1.310444325208663940e-01 9.411764740943908691e-01 2.484690551757812500e+02
4.800000000000000000e+01 6.021230769230768374e+02 1.855704193115234375e+02 -4.911132812500000000e+00 1.622387319803237915e-01 9.411764740943908691e-01 3.113084716796875000e+02
2.300000000000000000e+01 6.408846153846152447e+02 1.819532470703125000e+02 -5.327850341796875000e+00 3.432339131832122803e-01 1.470588207244873047e+00 5.419951171875000000e+02
6.000000000000000000e+01 6.661076923076921048e+02 1.986775665283203125e+02 -5.627410888671875000e+00 6.204401850700378418e-01 6.470588445663452148e-01 8.066466064453125000e+02
4.100000000000000000e+01 6.735846153846154039e+02 2.396734466552734375e+02 -5.927001953125000000e+00 5.608506202697753906e-01 4.117647111415863037e-01 6.635614013671875000e+02
6.600000000000000000e+01 6.803692307692307395e+02 2.925787658691406250e+02 -6.226562500000000000e+00 7.399882674217224121e-01 6.470588445663452148e-01 7.784636840820312500e+02
6.800000000000000000e+01 6.747538461538458705e+02 3.312935180664062500e+02 -6.463714599609375000e+00 5.358743071556091309e-01 5.882353186607360840e-01 6.455067138671875000e+02
5.100000000000000000e+01 6.793384615384615017e+02 3.414023132324218750e+02 -6.513580322265625000e+00 7.677318453788757324e-01 7.058823704719543457e-01 1.044090942382812500e+03
2.800000000000000000e+01 6.851307692307693742e+02 3.366241149902343750e+02 -6.563476562500000000e+00 7.450668811798095703e-01 5.882353186607360840e-01 8.042445678710937500e+02
5.100000000000000000e+01 6.861461538461539931e+02 3.046287841796875000e+02 -6.613342285156250000e+00 8.325942158699035645e-01 9.411764740943908691e-01 9.575388793945312500e+02
5.100000000000000000e+01 6.502076923076922412e+02 2.827826232910156250e+02 -6.460571289062500000e+00 5.959826707839965820e-01 0.000000000000000000e+00 8.335162353515625000e+02
5.600000000000000000e+01 6.190615384615383618e+02 2.626112365722656250e+02 -6.105133056640625000e+00 2.373026311397552490e-01 6.470588445663452148e-01 2.990655212402343750e+02
1.800000000000000000e+01 5.837230769230772012e+02 2.204860382080078125e+02 -5.749725341796875000e+00 1.202784627676010132e-01 8.823529481887817383e-01 1.174815673828125000e+02
5.700000000000000000e+01 6.237384615384611379e+02 1.752616424560546875e+02 -4.980682373046875000e+00 2.072181254625320435e-01 2.352941185235977173e-01 2.687131347656250000e+02
3.100000000000000000e+01 6.500615384615388166e+02 1.735241851806640625e+02 -4.547668457031250000e+00 2.186650782823562622e-01 0.000000000000000000e+00 2.966491088867187500e+02
2.300000000000000000e+01 6.859461538461541750e+02 1.891087646484375000e+02 -4.114654541015625000e+00 3.569678962230682373e-01 5.294117927551269531e-01 5.896461791992187500e+02
6.800000000000000000e+01 6.711769230769228898e+02 2.134598999023437500e+02 -3.681640625000000000e+00 3.461315929889678955e-01 1.176470592617988586e-01 4.778445434570312500e+02
1.700000000000000000e+01 6.577230769230770875e+02 2.058126068115234375e+02 -2.876037597656250000e+00 9.999999776482582092e-03 9.411764740943908691e-01 9.189920425415039062e+00
6.800000000000000000e+01 6.651923076923077360e+02 2.172638397216796875e+02 -2.101837158203125000e+00 9.999999776482582092e-03 6.470588445663452148e-01 2.160303649902343750e+02
5.800000000000000000e+01 6.458000000000002956e+02 2.814067993164062500e+02 -1.270355224609375000e+00 9.999999776482582092e-03 0.000000000000000000e+00 6.919288635253906250e+01
6.400000000000000000e+01 6.912846153846149946e+02 3.049511108398437500e+02 -1.102783203125000000e+00 9.999999776482582092e-03 0.000000000000000000e+00 5.421742630004882812e+01
2.000000000000000000e+01 7.851923076923078497e+02 3.614908447265625000e+02 1.468627929687500000e+00 0.000000000000000000e+00 0.000000000000000000e+00 1.625629730224609375e+02
2.700000000000000000e+01 7.887846153846155630e+02 3.979507751464843750e+02 1.108825683593750000e+00 9.999999776482582092e-03 0.000000000000000000e+00 2.762058105468750000e+02
4.100000000000000000e+01 8.481000000000004775e+02 4.306487731933593750e+02 1.135498046875000000e+00 0.000000000000000000e+00 0.000000000000000000e+00 2.373038635253906250e+02
7.500000000000000000e+01 3.138869230769229944e+03 5.156352539062500000e+02 4.076385498046875000e+00 0.000000000000000000e+00 0.000000000000000000e+00 2.216110687255859375e+02
7.200000000000000000e+01 2.574500000000000000e+03 3.835220336914062500e+02 3.265502929687500000e+00 0.000000000000000000e+00 0.000000000000000000e+00 8.134819335937500000e+02
9.000000000000000000e+00 2.026292307692307304e+03 2.815679016113281250e+02 2.714141845703125000e+00 0.000000000000000000e+00 0.000000000000000000e+00 1.326183959960937500e+03
1.000000000000000000e+00 1.641892307692307895e+03 1.346718444824218750e+02 2.162780761718750000e+00 0.000000000000000000e+00 0.000000000000000000e+00 1.497305419921875000e+03
5.300000000000000000e+01 1.343299999999999727e+03 1.235006637573242188e+02 1.611419677734375000e+00 0.000000000000000000e+00 2.941176593303680420e-01 1.149692504882812500e+03
1.400000000000000000e+01 1.135146153846153993e+03 8.621308898925781250e+01 9.088439941406250000e-01 5.433080196380615234e-01 5.294117927551269531e-01 1.956757934570312500e+03
3.600000000000000000e+01 5.041615384615385551e+02 9.142065429687500000e+01 -5.971374511718750000e-01 0.000000000000000000e+00 0.000000000000000000e+00 1.378151245117187500e+03
2.900000000000000000e+01 4.719000000000002046e+02 1.199752655029296875e+02 -1.350128173828125000e+00 0.000000000000000000e+00 8.823529481887817383e-01 1.241383178710937500e+03
2.100000000000000000e+01 3.791692307692309782e+02 1.600068054199218750e+02 -1.521881103515625000e+00 0.000000000000000000e+00 2.352941185235977173e-01 1.283567504882812500e+03
4.900000000000000000e+01 3.657846153846154493e+02 1.764146728515625000e+02 -1.693603515625000000e+00 0.000000000000000000e+00 0.000000000000000000e+00 1.047333251953125000e+03
6.900000000000000000e+01 3.804923076923078611e+02 1.805042572021484375e+02 -1.865356445312500000e+00 0.000000000000000000e+00 7.647058963775634766e-01 9.904421997070312500e+02
6.400000000000000000e+01 4.284692307692308191e+02 1.878542785644531250e+02 -2.097442626953125000e+00 0.000000000000000000e+00 0.000000000000000000e+00 1.064200805664062500e+03
4.900000000000000000e+01 4.978769230769227647e+02 1.904319305419921875e+02 -2.510528564453125000e+00 0.000000000000000000e+00 2.352941185235977173e-01 1.008172973632812500e+03
4.200000000000000000e+01 7.029384615384617518e+02 2.082956237792968750e+02 -2.923614501953125000e+00 0.000000000000000000e+00 4.705882370471954346e-01 1.178273071289062500e+03
5.600000000000000000e+01 7.604000000000000909e+02 2.363923797607421875e+02 -3.336730957031250000e+00 0.000000000000000000e+00 0.000000000000000000e+00 1.415177856445312500e+03
5.800000000000000000e+01 1.033500000000000227e+03 2.792909240722656250e+02 -3.598480224609375000e+00 9.999999776482582092e-03 2.941176593303680420e-01 1.168028198242187500e+03
4.800000000000000000e+01 1.134476923076922958e+03 3.211768188476562500e+02 -3.708892822265625000e+00 9.999999776482582092e-03 0.000000000000000000e+00 1.681588256835937500e+03
5.500000000000000000e+01 1.331876923076923276e+03 3.551374206542968750e+02 -3.819335937500000000e+00 0.000000000000000000e+00 5.294117927551269531e-01 1.239281860351562500e+03
6.200000000000000000e+01 1.401353846153846916e+03 3.854601745605468750e+02 -3.752990722656250000e+00 9.999999776482582092e-03 2.352941185235977173e-01 1.677941894531250000e+03
5.300000000000000000e+01 6.266076923076924459e+02 2.123190612792968750e+02 -2.018798828125000000e+00 0.000000000000000000e+00 2.941176593303680420e-01 1.649852539062500000e+03
1.900000000000000000e+01 5.343999999999998636e+02 1.957402954101562500e+02 -1.560485839843750000e+00 0.000000000000000000e+00 1.764705926179885864e-01 1.160038574218750000e+03
6.000000000000000000e+00 3.401230769230768942e+02 9.364907836914062500e+01 1.076721191406250000e+00 0.000000000000000000e+00 0.000000000000000000e+00 8.072971191406250000e+02
5.000000000000000000e+00 3.084384615384615813e+02 9.334529876708984375e+01 1.361785888671875000e+00 0.000000000000000000e+00 0.000000000000000000e+00 7.660095825195312500e+02
5.000000000000000000e+00 3.212615384615385210e+02 9.963726806640625000e+01 1.646820068359375000e+00 0.000000000000000000e+00 0.000000000000000000e+00 7.534255981445312500e+02
6.000000000000000000e+00 3.288923076923075541e+02 1.076981506347656250e+02 1.688720703125000000e+00 0.000000000000000000e+00 0.000000000000000000e+00 6.708427734375000000e+02
5.000000000000000000e+00 3.309769230769232990e+02 1.206147232055664062e+02 1.649566650390625000e+00 0.000000000000000000e+00 0.000000000000000000e+00 7.191429443359375000e+02
2.000000000000000000e+00 3.241846153846154266e+02 1.159506149291992188e+02 1.610412597656250000e+00 0.000000000000000000e+00 0.000000000000000000e+00 7.056986083984375000e+02
0.000000000000000000e+00 3.238384615384615017e+02 1.224186477661132812e+02 1.571289062500000000e+00 0.000000000000000000e+00 3.529411852359771729e-01 6.258101196289062500e+02
2.000000000000000000e+00 3.300384615384618314e+02 1.437984924316406250e+02 1.302551269531250000e+00 0.000000000000000000e+00 0.000000000000000000e+00 6.747471923828125000e+02
6.000000000000000000e+00 3.229846153846153243e+02 1.676292724609375000e+02 7.651062011718750000e-01 0.000000000000000000e+00 5.882353186607360840e-01 5.342119750976562500e+02
1.800000000000000000e+01 4.575384615384614904e+02 1.873723297119140625e+02 -6.492004394531250000e-01 0.000000000000000000e+00 1.294117689132690430e+00 5.312339477539062500e+02
5.000000000000000000e+01 5.407307692307692832e+02 1.435936126708984375e+02 -3.235473632812500000e-01 9.999999776482582092e-03 1.470588207244873047e+00 6.545857543945312500e+02
5.500000000000000000e+01 5.746384615384615699e+02 1.086672363281250000e+02 -2.473449707031250000e-01 9.999999776482582092e-03 0.000000000000000000e+00 6.775545043945312500e+02
3.300000000000000000e+01 5.747615384615384073e+02 7.991731262207031250e+01 -1.711425781250000000e-01 0.000000000000000000e+00 0.000000000000000000e+00 2.981844482421875000e+02
3.900000000000000000e+01 5.247384615384612516e+02 6.542035675048828125e+01 -9.494018554687500000e-02 0.000000000000000000e+00 0.000000000000000000e+00 2.551768341064453125e+02
1.800000000000000000e+01 4.998000000000000682e+02 7.435243225097656250e+01 -5.307006835937500000e-02 0.000000000000000000e+00 0.000000000000000000e+00 2.513108520507812500e+02
3.300000000000000000e+01 5.681461538461535383e+02 1.056916885375976562e+02 -2.365417480468750000e-01 0.000000000000000000e+00 0.000000000000000000e+00 2.267123107910156250e+02
5.700000000000000000e+01 6.481076923076924459e+02 1.230631561279296875e+02 -8.197937011718750000e-01 0.000000000000000000e+00 0.000000000000000000e+00 2.523748016357421875e+02
3.700000000000000000e+01 6.571692307692311488e+02 1.338840942382812500e+02 -1.040832519531250000e+00 0.000000000000000000e+00 0.000000000000000000e+00 2.947053222656250000e+02
4.400000000000000000e+01 6.640538461538459387e+02 1.431228027343750000e+02 -1.226226806640625000e+00 0.000000000000000000e+00 0.000000000000000000e+00 3.178142395019531250e+02
4.600000000000000000e+01 6.754692307692305349e+02 1.528218688964843750e+02 -1.399688720703125000e+00 0.000000000000000000e+00 5.294117927551269531e-01 3.568327331542968750e+02
6.700000000000000000e+01 6.883846153846152447e+02 1.564666900634765625e+02 -1.573150634765625000e+00 0.000000000000000000e+00 0.000000000000000000e+00 3.766885681152343750e+02
7.000000000000000000e+01 7.268230769230768828e+02 1.583094177246093750e+02 -1.844024658203125000e+00 9.999999776482582092e-03 2.352941185235977173e-01 3.710452270507812500e+02
6.500000000000000000e+01 7.652461538461536747e+02 1.720321044921875000e+02 -1.941467285156250000e+00 9.999999776482582092e-03 0.000000000000000000e+00 3.767803039550781250e+02
6.000000000000000000e+01 7.849615384615384528e+02 2.000207519531250000e+02 -2.038879394531250000e+00 9.999999776482582092e-03 0.000000000000000000e+00 4.260244445800781250e+02
3.800000000000000000e+01 7.865230769230768146e+02 2.195747222900390625e+02 -2.129058837890625000e+00 9.999999776482582092e-03 0.000000000000000000e+00 4.024723510742187500e+02
4.700000000000000000e+01 7.997923076923077588e+02 2.222247619628906250e+02 -2.197540283203125000e+00 9.999999776482582092e-03 1.176470592617988586e-01 4.109045410156250000e+02
5.300000000000000000e+01 8.263153846153842323e+02 2.196855010986328125e+02 -2.414367675781250000e+00 9.999999776482582092e-03 0.000000000000000000e+00 3.343794555664062500e+02
6.300000000000000000e+01 7.947000000000002728e+02 2.322457733154296875e+02 -2.505615234375000000e+00 9.999999776482582092e-03 2.941176593303680420e-01 3.554184265136718750e+02
6.100000000000000000e+01 7.654230769230770193e+02 1.679092559814453125e+02 -2.596862792968750000e+00 1.122075244784355164e-01 1.764705926179885864e-01 3.413318786621093750e+02
5.300000000000000000e+01 7.394615384615385665e+02 1.064694747924804688e+02 -2.688140869140625000e+00 9.999999776482582092e-03 0.000000000000000000e+00 3.175368957519531250e+02
5.200000000000000000e+01 7.088999999999997499e+02 5.854127883911132812e+01 -2.842315673828125000e+00 1.030334755778312683e-01 0.000000000000000000e+00 2.684226989746093750e+02
3.000000000000000000e+01 6.987461538461539021e+02 7.398764038085937500e+01 -2.917419433593750000e+00 9.999999776482582092e-03 5.882352963089942932e-02 2.208514251708984375e+02
4.500000000000000000e+01 6.779153846153848235e+02 8.529138946533203125e+01 -2.992492675781250000e+00 9.999999776482582092e-03 2.352941185235977173e-01 1.739680328369140625e+02
2.300000000000000000e+01 6.680461538461541977e+02 1.118117828369140625e+02 -2.968841552734375000e+00 9.999999776482582092e-03 0.000000000000000000e+00 1.646343383789062500e+02
4.500000000000000000e+01 6.548846153846153584e+02 1.562744445800781250e+02 -2.945190429687500000e+00 9.999999776482582092e-03 0.000000000000000000e+00 1.575185241699218750e+02
2.600000000000000000e+01 6.481538461538461888e+02 2.155488433837890625e+02 -2.921569824218750000e+00 9.999999776482582092e-03 0.000000000000000000e+00 1.638378295898437500e+02
3.700000000000000000e+01 6.403692307692308532e+02 2.819221801757812500e+02 -2.865783691406250000e+00 9.999999776482582092e-03 0.000000000000000000e+00 1.069773864746093750e+02
3.600000000000000000e+01 6.279461538461538339e+02 3.106147766113281250e+02 -2.561401367187500000e+00 9.999999776482582092e-03 0.000000000000000000e+00 6.965806579589843750e+01
1.200000000000000000e+01 6.275076923076921958e+02 3.004506835937500000e+02 -2.409210205078125000e+00 9.999999776482582092e-03 0.000000000000000000e+00 6.332442474365234375e+01
1.600000000000000000e+01 6.176692307692309214e+02 2.925590820312500000e+02 -2.479064941406250000e+00 9.999999776482582092e-03 0.000000000000000000e+00 5.769877624511718750e+01
1.700000000000000000e+01 6.162923076923078725e+02 2.797950439453125000e+02 -3.062866210937500000e+00 9.999999776482582092e-03 0.000000000000000000e+00 3.465790557861328125e+01
2.900000000000000000e+01 6.249769230769232990e+02 2.791530456542968750e+02 -3.354766845703125000e+00 9.999999776482582092e-03 0.000000000000000000e+00 1.102250480651855469e+01
3.400000000000000000e+01 6.810923076923079407e+02 2.877236328125000000e+02 -2.178314208984375000e+00 9.999999776482582092e-03 0.000000000000000000e+00 2.103094863891601562e+01
1.600000000000000000e+01 7.184692307692306485e+02 2.954056091308593750e+02 -2.415588378906250000e+00 1.012064889073371887e-01 0.000000000000000000e+00 6.597674560546875000e+01
2.700000000000000000e+01 7.294153846153844825e+02 3.060532226562500000e+02 -2.652862548828125000e+00 1.190177798271179199e-01 5.882353186607360840e-01 1.578467102050781250e+02
1.300000000000000000e+01 7.470538461538463935e+02 3.166062011718750000e+02 -2.890136718750000000e+00 1.287701874971389771e-01 1.117647051811218262e+00 1.890024108886718750e+02
3.900000000000000000e+01 7.868153846153849145e+02 3.261210021972656250e+02 -3.126312255859375000e+00 1.496048718690872192e-01 1.117647051811218262e+00 2.167120971679687500e+02
2.100000000000000000e+01 8.018153846153844597e+02 3.370864257812500000e+02 -3.359161376953125000e+00 1.494865864515304565e-01 8.823529481887817383e-01 2.480408325195312500e+02
2.500000000000000000e+01 7.938923076923080089e+02 3.526085815429687500e+02 -3.591979980468750000e+00 1.600692570209503174e-01 5.882353186607360840e-01 2.887433471679687500e+02
1.700000000000000000e+01 8.116153846153848690e+02 3.701446228027343750e+02 -3.824829101562500000e+00 1.709001511335372925e-01 6.470588445663452148e-01 3.040672302246093750e+02
3.300000000000000000e+01 8.319076923076924004e+02 3.818526000976562500e+02 -3.992218017578125000e+00 1.741609722375869751e-01 6.470588445663452148e-01 3.550698852539062500e+02
2.000000000000000000e+01 8.778846153846151310e+02 3.684778747558593750e+02 -4.196044921875000000e+00 2.027455866336822510e-01 7.058823704719543457e-01 3.644943847656250000e+02
2.800000000000000000e+01 8.781384615384615699e+02 2.733193359375000000e+02 -4.297973632812500000e+00 2.097456902265548706e-01 2.941176593303680420e-01 4.004848937988281250e+02
4.200000000000000000e+01 8.718461538461541522e+02 2.229691162109375000e+02 -4.289978027343750000e+00 4.246814250946044922e-01 9.411764740943908691e-01 7.321055908203125000e+02
3.700000000000000000e+01 8.955692307692307850e+02 2.110308532714843750e+02 -4.245330810546875000e+00 3.465285897254943848e-01 7.058823704719543457e-01 6.887566528320312500e+02
2.300000000000000000e+01 9.206846153846150855e+02 2.051658935546875000e+02 -4.156066894531250000e+00 2.767788171768188477e-01 5.882353186607360840e-01 5.872561645507812500e+02
2.300000000000000000e+01 9.583230769230772239e+02 2.089799652099609375e+02 -4.110290527343750000e+00 3.187821209430694580e-01 6.470588445663452148e-01 6.657482299804687500e+02
3.800000000000000000e+01 9.647769230769231399e+02 2.256582946777343750e+02 -4.064483642578125000e+00 2.708097100257873535e-01 2.941176593303680420e-01 5.459584960937500000e+02
4.000000000000000000e+01 9.901615384615391804e+02 2.438305358886718750e+02 -4.018676757812500000e+00 2.183318585157394409e-01 2.941176593303680420e-01 5.573703613281250000e+02
5.000000000000000000e+01 1.006453846153846371e+03 2.646429138183593750e+02 -3.985809326171875000e+00 1.989724189043045044e-01 6.470588445663452148e-01 4.575245666503906250e+02
6.700000000000000000e+01 1.026969230769230535e+03 3.055515441894531250e+02 -3.991638183593750000e+00 2.452758848667144775e-01 0.000000000000000000e+00 5.317663574218750000e+02
6.600000000000000000e+01 1.090684615384615199e+03 3.797610168457031250e+02 -3.997467041015625000e+00 2.732339799404144287e-01 5.882353186607360840e-01 5.400775756835937500e+02
5.500000000000000000e+01 1.112500000000000455e+03 4.506540222167968750e+02 -4.003295898437500000e+00 3.411627113819122314e-01 0.000000000000000000e+00 8.259348754882812500e+02
6.400000000000000000e+01 1.074738461538461706e+03 4.537084960937500000e+02 -3.991607666015625000e+00 5.152075886726379395e-01 0.000000000000000000e+00 8.089524536132812500e+02
5.000000000000000000e+01 9.602153846153850054e+02 4.546893920898437500e+02 -3.962432861328125000e+00 2.340245246887207031e-01 0.000000000000000000e+00 6.348272094726562500e+02
4.600000000000000000e+01 8.733461538461542659e+02 4.655532226562500000e+02 -3.933258056640625000e+00 2.454797327518463135e-01 0.000000000000000000e+00 6.174445800781250000e+02
5.000000000000000000e+01 7.919076923076924004e+02 4.526529541015625000e+02 -3.904052734375000000e+00 3.030402958393096924e-01 0.000000000000000000e+00 6.946812744140625000e+02
2.300000000000000000e+01 8.330923076923079407e+02 4.285067138671875000e+02 -3.810241699218750000e+00 3.155253529548645020e-01 6.470588445663452148e-01 6.610869140625000000e+02
5.200000000000000000e+01 9.535615384615388166e+02 3.740239562988281250e+02 -3.694854736328125000e+00 3.893578648567199707e-01 0.000000000000000000e+00 7.067975463867187500e+02
4.900000000000000000e+01 9.762846153846154493e+02 3.318695068359375000e+02 -3.579467773437500000e+00 3.731388747692108154e-01 5.882353186607360840e-01 7.424209594726562500e+02
5.100000000000000000e+01 9.951692307692308077e+02 2.887999267578125000e+02 -3.247222900390625000e+00 2.726007103919982910e-01 0.000000000000000000e+00 6.065104980468750000e+02
2.300000000000000000e+01 9.934769230769228443e+02 2.834287109375000000e+02 -3.030334472656250000e+00 2.055884301662445068e-01 0.000000000000000000e+00 5.578904418945312500e+02
6.200000000000000000e+01 1.040815384615384119e+03 2.901202392578125000e+02 -2.813446044921875000e+00 1.802226006984710693e-01 0.000000000000000000e+00 4.587349853515625000e+02
6.000000000000000000e+01 1.091361538461538430e+03 3.330640258789062500e+02 -1.848205566406250000e+00 1.323461979627609253e-01 0.000000000000000000e+00 4.619710388183593750e+02
1.200000000000000000e+01 1.085969230769231444e+03 2.318162384033203125e+02 -1.491485595703125000e+00 9.999999776482582092e-03 5.882353186607360840e-01 3.662077026367187500e+02
5.300000000000000000e+01 1.075253846153846325e+03 2.843674621582031250e+02 -9.715576171875000000e-01 9.999999776482582092e-03 0.000000000000000000e+00 3.769444580078125000e+02
5.000000000000000000e+01 1.084092307692307941e+03 4.386406555175781250e+02 -7.438659667968750000e-01 9.999999776482582092e-03 1.176470592617988586e-01 2.613114929199218750e+02
7.000000000000000000e+01 1.118753846153846553e+03 4.300524902343750000e+02 -5.161437988281250000e-01 0.000000000000000000e+00 0.000000000000000000e+00 2.338056640625000000e+02
5.700000000000000000e+01 1.162984615384615836e+03 4.195746459960937500e+02 -2.987670898437500000e-01 9.999999776482582092e-03 0.000000000000000000e+00 3.452944641113281250e+02
5.600000000000000000e+01 1.183307692307692378e+03 4.023888854980468750e+02 1.290588378906250000e-01 0.000000000000000000e+00 0.000000000000000000e+00 1.837943267822265625e+02
5.600000000000000000e+01 1.635715384615384664e+03 5.375255737304687500e+02 1.102343750000000000e+01 0.000000000000000000e+00 0.000000000000000000e+00 2.465389862060546875e+02
1.600000000000000000e+01 1.527599999999999909e+03 5.189183349609375000e+02 1.081600952148437500e+01 0.000000000000000000e+00 0.000000000000000000e+00 2.779719543457031250e+02
2.500000000000000000e+01 1.229176923076923231e+03 4.283737182617187500e+02 1.018719482421875000e+01 0.000000000000000000e+00 0.000000000000000000e+00 6.671133422851562500e+01
2.200000000000000000e+01 1.532230769230769283e+03 4.076017150878906250e+02 9.978942871093750000e+00 0.000000000000000000e+00 0.000000000000000000e+00 7.604005432128906250e+01
1.500000000000000000e+01 2.040507692307691968e+03 4.308313293457031250e+02 9.770690917968750000e+00 0.000000000000000000e+00 0.000000000000000000e+00 2.873213195800781250e+02
1.100000000000000000e+01 1.443992307692308259e+03 4.177210693359375000e+02 9.764099121093750000e+00 0.000000000000000000e+00 0.000000000000000000e+00 2.965553894042968750e+02
4.500000000000000000e+01 1.011423076923076792e+03 3.344501342773437500e+02 9.757537841796875000e+00 0.000000000000000000e+00 0.000000000000000000e+00 1.592286224365234375e+02
1.400000000000000000e+01 8.380076923076923094e+02 3.081387634277343750e+02 9.750946044921875000e+00 0.000000000000000000e+00 0.000000000000000000e+00 8.487362670898437500e+01
4.500000000000000000e+01 8.493769230769230489e+02 3.407834472656250000e+02 8.458679199218750000e+00 0.000000000000000000e+00 0.000000000000000000e+00 3.309125518798828125e+01
1.300000000000000000e+01 8.217769230769234809e+02 3.321543273925781250e+02 8.274902343750000000e+00 0.000000000000000000e+00 0.000000000000000000e+00 7.524672985076904297e+00
6.000000000000000000e+00 7.776769230769228898e+02 3.360541687011718750e+02 7.649383544921875000e+00 0.000000000000000000e+00 0.000000000000000000e+00 8.853344726562500000e+01
3.700000000000000000e+01 5.736846153846151992e+02 2.636300964355468750e+02 7.127136230468750000e+00 0.000000000000000000e+00 0.000000000000000000e+00 6.255247497558593750e+01
8.000000000000000000e+00 5.602769230769231399e+02 2.579613037109375000e+02 7.117309570312500000e+00 0.000000000000000000e+00 0.000000000000000000e+00 3.909637069702148438e+01
4.500000000000000000e+01 5.549384615384615245e+02 2.302330017089843750e+02 7.058898925781250000e+00 0.000000000000000000e+00 0.000000000000000000e+00 5.552766418457031250e+01
4.900000000000000000e+01 5.725769230769229807e+02 2.300021209716796875e+02 7.029693603515625000e+00 0.000000000000000000e+00 0.000000000000000000e+00 5.053768157958984375e+01
1.400000000000000000e+01 5.800230769230770420e+02 2.404673461914062500e+02 6.987396240234375000e+00 0.000000000000000000e+00 2.941176593303680420e-01 1.132873992919921875e+02
4.300000000000000000e+01 5.634230769230769056e+02 2.488235473632812500e+02 6.932037353515625000e+00 0.000000000000000000e+00 0.000000000000000000e+00 7.836509704589843750e+01
1.100000000000000000e+01 5.578923076923077815e+02 2.465953674316406250e+02 6.876647949218750000e+00 0.000000000000000000e+00 2.941176593303680420e-01 9.973426818847656250e+01
3.100000000000000000e+01 5.080000000000000000e+02 2.405587615966796875e+02 5.927307128906250000e+00 0.000000000000000000e+00 0.000000000000000000e+00 1.043331375122070312e+02
3.200000000000000000e+01 5.310615384615385892e+02 2.293300018310546875e+02 5.796325683593750000e+00 0.000000000000000000e+00 0.000000000000000000e+00 1.785251159667968750e+02
8.000000000000000000e+00 5.173384615384613880e+02 2.197473907470703125e+02 5.665344238281250000e+00 0.000000000000000000e+00 0.000000000000000000e+00 1.480104980468750000e+02
3.800000000000000000e+01 5.363384615384618428e+02 2.191446380615234375e+02 5.466461181640625000e+00 0.000000000000000000e+00 0.000000000000000000e+00 1.467352294921875000e+02
1.600000000000000000e+01 6.019153846153849372e+02 2.509745941162109375e+02 5.263336181640625000e+00 0.000000000000000000e+00 6.470588445663452148e-01 1.570476989746093750e+02
5.100000000000000000e+01 6.664076923076922867e+02 3.151773071289062500e+02 5.298522949218750000e+00 0.000000000000000000e+00 8.823529481887817383e-01 1.231196365356445312e+02
3.400000000000000000e+01 6.512615384615384073e+02 2.805560302734375000e+02 4.950744628906250000e+00 0.000000000000000000e+00 8.823529481887817383e-01 1.261525497436523438e+02
1.200000000000000000e+01 5.375230769230770420e+02 1.825640258789062500e+02 3.164611816406250000e+00 0.000000000000000000e+00 3.117647171020507812e+00 1.506119384765625000e+02
8.000000000000000000e+00 5.049999999999996021e+02 1.915548400878906250e+02 3.150939941406250000e+00 0.000000000000000000e+00 3.058823585510253906e+00 2.115552673339843750e+02
6.000000000000000000e+00 5.006615384615385551e+02 1.934157714843750000e+02 3.354949951171875000e+00 0.000000000000000000e+00 2.764705896377563477e+00 1.876365203857421875e+02
1.000000000000000000e+00 5.127538461538463253e+02 1.865799560546875000e+02 3.783020019531250000e+00 0.000000000000000000e+00 1.941176414489746094e+00 1.511422729492187500e+02
2.000000000000000000e+00 4.722846153846152220e+02 1.493348846435546875e+02 4.104583740234375000e+00 0.000000000000000000e+00 2.235294103622436523e+00 1.164669799804687500e+02
2.500000000000000000e+01 3.612538461538462116e+02 2.064820404052734375e+02 1.293884277343750000e+00 0.000000000000000000e+00 2.941176593303680420e-01 5.332190551757812500e+02
3.000000000000000000e+01 3.553076923076922640e+02 2.031617431640625000e+02 1.182800292968750000e+00 0.000000000000000000e+00 0.000000000000000000e+00 5.518046264648437500e+02
1.000000000000000000e+00 3.232153846153846075e+02 1.301820220947265625e+02 1.152435302734375000e+00 0.000000000000000000e+00 1.529411792755126953e+00 3.663503112792968750e+02
1.000000000000000000e+00 3.142076923076922412e+02 1.170728378295898438e+02 1.745574951171875000e+00 0.000000000000000000e+00 3.176470518112182617e+00 2.298098449707031250e+02
1.000000000000000000e+00 2.893769230769231058e+02 1.155849380493164062e+02 1.459838867187500000e+00 0.000000000000000000e+00 1.647058844566345215e+00 3.421421813964843750e+02
1.000000000000000000e+00 3.232769230769229125e+02 1.267036666870117188e+02 1.244964599609375000e+00 0.000000000000000000e+00 3.117647171020507812e+00 3.396660766601562500e+02
1.000000000000000000e+00 3.276307692307692605e+02 1.339318389892578125e+02 1.353729248046875000e+00 0.000000000000000000e+00 2.764705896377563477e+00 2.062481384277343750e+02
1.000000000000000000e+00 3.281538461538459615e+02 1.323930969238281250e+02 1.395935058593750000e+00 0.000000000000000000e+00 2.235294103622436523e+00 2.073137207031250000e+02
1.000000000000000000e+00 3.226846153846153697e+02 1.300460052490234375e+02 1.455871582031250000e+00 0.000000000000000000e+00 2.294117689132690430e+00 1.677747955322265625e+02
0.000000000000000000e+00 3.122153846153847780e+02 1.246203613281250000e+02 1.515808105468750000e+00 0.000000000000000000e+00 1.647058844566345215e+00 1.366909179687500000e+02
1.000000000000000000e+00 2.975615384615385324e+02 1.165103302001953125e+02 1.575744628906250000e+00 0.000000000000000000e+00 1.294117689132690430e+00 1.228527069091796875e+02
1.000000000000000000e+00 2.828076923076921503e+02 1.102249069213867188e+02 1.634155273437500000e+00 0.000000000000000000e+00 2.176470518112182617e+00 1.177053909301757812e+02
2.000000000000000000e+00 2.725769230769229807e+02 1.148746109008789062e+02 1.747955322265625000e+00 0.000000000000000000e+00 2.941176414489746094e+00 1.231460571289062500e+02
0.000000000000000000e+00 2.694538461538462002e+02 1.127434997558593750e+02 1.976074218750000000e+00 0.000000000000000000e+00 2.176470518112182617e+00 1.418773040771484375e+02
4.000000000000000000e+00 3.555692307692307850e+02 1.441856689453125000e+02 2.155212402343750000e+00 0.000000000000000000e+00 1.058823585510253906e+00 2.426648559570312500e+02
2.300000000000000000e+01 5.081076923076923322e+02 2.005483551025390625e+02 8.754272460937500000e-01 0.000000000000000000e+00 1.823529362678527832e+00 1.441516876220703125e+02
8.000000000000000000e+00 4.855153846153847894e+02 2.348161010742187500e+02 -1.312744140625000000e+00 0.000000000000000000e+00 1.823529362678527832e+00 2.338879852294921875e+02
7.000000000000000000e+00 4.855923076923076565e+02 2.599839172363281250e+02 -1.950256347656250000e+00 0.000000000000000000e+00 7.647058963775634766e-01 2.624255065917968750e+02
3.300000000000000000e+01 4.944538461538462570e+02 2.987264709472656250e+02 -2.504669189453125000e+00 0.000000000000000000e+00 0.000000000000000000e+00 4.187490234375000000e+02
4.800000000000000000e+01 4.969307692307691013e+02 3.195494689941406250e+02 -3.059082031250000000e+00 0.000000000000000000e+00 0.000000000000000000e+00 3.326931762695312500e+02
5.200000000000000000e+01 4.897384615384614790e+02 3.162839660644531250e+02 -3.613464355468750000e+00 0.000000000000000000e+00 0.000000000000000000e+00 4.264547119140625000e+02
6.000000000000000000e+01 5.006538461538461320e+02 2.983327636718750000e+02 -4.064239501953125000e+00 0.000000000000000000e+00 2.941176593303680420e-01 8.605977783203125000e+02
6.700000000000000000e+01 4.940615384615381345e+02 2.786139526367187500e+02 -4.204071044921875000e+00 3.242505490779876709e-01 0.000000000000000000e+00 1.086932006835937500e+03
6.200000000000000000e+01 4.723999999999998636e+02 2.605651245117187500e+02 -4.343933105468750000e+00 2.527747154235839844e-01 5.882352963089942932e-02 1.302760009765625000e+03
5.900000000000000000e+01 4.621000000000000227e+02 2.500578918457031250e+02 -4.483764648437500000e+00 3.067324161529541016e-01 2.941176593303680420e-01 9.381461181640625000e+02
5.900000000000000000e+01 4.990461538461537430e+02 2.374378967285156250e+02 -4.424804687500000000e+00 3.238154053688049316e-01 0.000000000000000000e+00 1.429429565429687500e+03
5.900000000000000000e+01 5.190384615384616609e+02 2.190530548095703125e+02 -4.167083740234375000e+00 2.346625626087188721e-01 5.882352963089942932e-02 9.284141235351562500e+02
6.800000000000000000e+01 5.468692307692309669e+02 2.059166717529296875e+02 -3.909362792968750000e+00 4.186608195304870605e-01 0.000000000000000000e+00 1.294551879882812500e+03
1.800000000000000000e+01 6.450153846153846189e+02 2.058044586181640625e+02 -3.579833984375000000e+00 7.008703351020812988e-01 0.000000000000000000e+00 1.688785766601562500e+03
5.500000000000000000e+01 7.457615384615387484e+02 2.165126342773437500e+02 -3.570007324218750000e+00 5.315950512886047363e-01 2.941176593303680420e-01 1.504803588867187500e+03
5.200000000000000000e+01 7.846076923076923322e+02 2.131905822753906250e+02 -3.560180664062500000e+00 2.694344520568847656e-01 1.058823585510253906e+00 1.091395996093750000e+03
3.200000000000000000e+01 7.672384615384618201e+02 1.754600677490234375e+02 -3.550354003906250000e+00 3.347938656806945801e-01 1.764705896377563477e+00 1.168749023437500000e+03
2.700000000000000000e+01 7.272923076923077588e+02 1.562923278808593750e+02 -3.852935791015625000e+00 4.115306138992309570e-01 9.411764740943908691e-01 1.300576538085937500e+03
7.100000000000000000e+01 6.797999999999998408e+02 1.475342712402343750e+02 -4.155517578125000000e+00 4.344869554042816162e-01 0.000000000000000000e+00 1.835286621093750000e+03
1.200000000000000000e+01 6.402999999999999545e+02 1.355299072265625000e+02 -4.458099365234375000e+00 9.495268464088439941e-01 5.882352963089942932e-02 1.967499511718750000e+03
5.600000000000000000e+01 5.804076923076920593e+02 1.242722167968750000e+02 -4.894134521484375000e+00 4.892394244670867920e-01 5.882352963089942932e-02 1.483078002929687500e+03
4.300000000000000000e+01 4.893384615384617859e+02 1.170721893310546875e+02 -5.730560302734375000e+00 1.773753464221954346e-01 1.176470637321472168e+00 9.540681762695312500e+02
6.800000000000000000e+01 4.699307692307695561e+02 1.201694793701171875e+02 -6.566955566406250000e+00 4.713699221611022949e-01 5.294117927551269531e-01 1.317560302734375000e+03
4.800000000000000000e+01 4.545384615384612630e+02 1.297930755615234375e+02 -7.403350830078125000e+00 5.216789245605468750e-01 2.941176593303680420e-01 1.324863037109375000e+03
1.200000000000000000e+01 4.605153846153847894e+02 1.405212097167968750e+02 -8.090423583984375000e+00 8.240131139755249023e-01 2.941176593303680420e-01 1.812946289062500000e+03
5.600000000000000000e+01 4.828769230769231058e+02 1.514663238525390625e+02 -8.628143310546875000e+00 7.325397729873657227e-01 0.000000000000000000e+00 1.767322875976562500e+03
2.700000000000000000e+01 4.550153846153846757e+02 1.515541839599609375e+02 -9.061035156250000000e+00 7.339830398559570312e-01 0.000000000000000000e+00 1.723767822265625000e+03
6.000000000000000000e+00 4.848923076923074973e+02 1.712295989990234375e+02 -8.617065429687500000e+00 7.829664945602416992e-01 0.000000000000000000e+00 1.886866333007812500e+03
4.600000000000000000e+01 6.152461538461540158e+02 1.910396728515625000e+02 -6.209564208984375000e+00 5.701243281364440918e-01 6.470588445663452148e-01 1.377045166015625000e+03
5.300000000000000000e+01 6.642461538461537884e+02 2.070521697998046875e+02 -5.227813720703125000e+00 2.283327728509902954e-01 0.000000000000000000e+00 9.709721679687500000e+02
3.200000000000000000e+01 6.357076923076923549e+02 2.205452880859375000e+02 -4.325286865234375000e+00 9.999999776482582092e-03 6.470588445663452148e-01 5.739201049804687500e+02
5.200000000000000000e+01 6.202692307692307168e+02 1.954152832031250000e+02 -3.660369873046875000e+00 9.999999776482582092e-03 1.823529362678527832e+00 6.704100952148437500e+02
3.800000000000000000e+01 5.656923076923078497e+02 1.851455841064453125e+02 -2.330505371093750000e+00 9.999999776482582092e-03 1.411764740943908691e+00 6.449544677734375000e+02
1.800000000000000000e+01 5.425615384615383618e+02 2.100844879150390625e+02 -1.938171386718750000e+00 2.045920789241790771e-01 9.411764740943908691e-01 7.830115356445312500e+02
4.800000000000000000e+01 3.780692307692307281e+02 1.467090148925781250e+02 -2.175567626953125000e+00 1.249895244836807251e-01 1.529411792755126953e+00 7.925499877929687500e+02
1.700000000000000000e+01 3.688307692307692491e+02 1.375809326171875000e+02 -3.010833740234375000e+00 9.999999776482582092e-03 1.117647051811218262e+00 6.294088745117187500e+02
5.500000000000000000e+01 3.830923076923075996e+02 1.439460296630859375e+02 -3.846099853515625000e+00 3.367627263069152832e-01 1.117647051811218262e+00 8.722396850585937500e+02
3.500000000000000000e+01 3.990615384615384187e+02 1.297789764404296875e+02 -5.219451904296875000e+00 3.249969780445098877e-01 1.000000000000000000e+00 1.171812255859375000e+03
1.600000000000000000e+01 4.092230769230767464e+02 1.247943572998046875e+02 -5.757537841796875000e+00 2.402503937482833862e-01 1.411764740943908691e+00 7.872113647460937500e+02
5.700000000000000000e+01 3.902999999999999545e+02 1.392941741943359375e+02 -6.295623779296875000e+00 3.442046046257019043e-01 5.882353186607360840e-01 9.861390991210937500e+02
1.800000000000000000e+01 3.834076923076922299e+02 1.470109710693359375e+02 -6.679168701171875000e+00 3.568010032176971436e-01 1.176470637321472168e+00 9.214922485351562500e+02
3.100000000000000000e+01 3.841846153846153129e+02 1.353818664550781250e+02 -6.599182128906250000e+00 4.383732974529266357e-01 1.411764740943908691e+00 1.089694946289062500e+03
1.500000000000000000e+01 3.760999999999999659e+02 1.299293823242187500e+02 -6.519226074218750000e+00 4.006676077842712402e-01 1.176470637321472168e+00 1.029520385742187500e+03
2.500000000000000000e+01 3.677384615384614790e+02 1.336388549804687500e+02 -6.439239501953125000e+00 4.629743993282318115e-01 1.235294103622436523e+00 1.169061035156250000e+03
7.000000000000000000e+00 3.614538461538463139e+02 1.254356842041015625e+02 -6.179718017578125000e+00 3.990936875343322754e-01 9.411764740943908691e-01 1.040685302734375000e+03
3.800000000000000000e+01 3.510153846153847894e+02 1.175774154663085938e+02 -5.301727294921875000e+00 3.589297831058502197e-01 2.294117689132690430e+00 9.559185791015625000e+02
4.900000000000000000e+01 3.583615384615384301e+02 1.122690429687500000e+02 -4.862701416015625000e+00 4.278572499752044678e-01 1.235294103622436523e+00 1.049628417968750000e+03
1.700000000000000000e+01 3.607384615384614790e+02 1.115007019042968750e+02 -4.572723388671875000e+00 3.788458406925201416e-01 1.411764740943908691e+00 9.206111450195312500e+02
3.200000000000000000e+01 3.593307692307693060e+02 1.124987335205078125e+02 -4.332366943359375000e+00 4.326155483722686768e-01 1.588235259056091309e+00 9.876885375976562500e+02
1.900000000000000000e+01 3.787384615384614222e+02 1.407078552246093750e+02 -4.183227539062500000e+00 3.521542847156524658e-01 1.941176414489746094e+00 6.506729125976562500e+02
3.300000000000000000e+01 3.869384615384615813e+02 1.564737243652343750e+02 -4.348999023437500000e+00 1.875975877046585083e-01 1.529411792755126953e+00 6.127921142578125000e+02
4.600000000000000000e+01 3.823615384615385437e+02 1.614723815917968750e+02 -4.543762207031250000e+00 3.633280396461486816e-01 1.352941155433654785e+00 6.652672729492187500e+02
1.600000000000000000e+01 3.876230769230770079e+02 1.770470581054687500e+02 -4.825561523437500000e+00 6.120436787605285645e-01 1.647058844566345215e+00 9.551909790039062500e+02
3.500000000000000000e+01 3.907769230769230262e+02 1.930776367187500000e+02 -5.107330322265625000e+00 3.496431410312652588e-01 1.352941155433654785e+00 6.632318115234375000e+02
2.400000000000000000e+01 3.950076923076924231e+02 2.067819976806640625e+02 -5.389129638671875000e+00 3.652800023555755615e-01 1.235294103622436523e+00 7.475314941406250000e+02
5.400000000000000000e+01 4.023923076923075541e+02 2.082266540527343750e+02 -5.518066406250000000e+00 4.808760881423950195e-01 1.647058844566345215e+00 8.256599121093750000e+02
6.100000000000000000e+01 4.109153846153847098e+02 2.149271850585937500e+02 -5.494140625000000000e+00 1.663816720247268677e-01 5.882353186607360840e-01 5.295565185546875000e+02
5.500000000000000000e+01 4.249307692307694424e+02 2.248954772949218750e+02 -5.470214843750000000e+00 3.794225752353668213e-01 1.058823585510253906e+00 7.210326538085937500e+02
3.500000000000000000e+01 4.310384615384617746e+02 2.276188659667968750e+02 -5.446289062500000000e+00 4.285865426063537598e-01 0.000000000000000000e+00 8.128855590820312500e+02
2.200000000000000000e+01 4.501230769230766668e+02 2.281789093017578125e+02 -5.221527099609375000e+00 6.846945881843566895e-01 2.941176593303680420e-01 8.643173217773437500e+02
3.500000000000000000e+01 4.657307692307694538e+02 2.361490783691406250e+02 -4.929779052734375000e+00 8.029470443725585938e-01 5.882352963089942932e-02 1.044858642578125000e+03
4.100000000000000000e+01 4.758153846153845734e+02 2.345554656982421875e+02 -4.638031005859375000e+00 5.039018392562866211e-01 0.000000000000000000e+00 8.583038330078125000e+02
5.500000000000000000e+01 4.803923076923077815e+02 2.211429290771484375e+02 -4.346282958984375000e+00 5.130259394645690918e-01 0.000000000000000000e+00 6.446795654296875000e+02
5.700000000000000000e+01 4.793538461538458364e+02 2.037931213378906250e+02 -4.007141113281250000e+00 3.546234667301177979e-01 0.000000000000000000e+00 5.429318847656250000e+02
5.200000000000000000e+01 4.743999999999999773e+02 1.802615661621093750e+02 -3.667999267578125000e+00 3.334347605705261230e-01 0.000000000000000000e+00 4.217160949707031250e+02
3.100000000000000000e+01 4.661384615384616836e+02 1.823967437744140625e+02 -3.328826904296875000e+00 1.891798526048660278e-01 0.000000000000000000e+00 3.955706176757812500e+02
1.200000000000000000e+01 4.564615384615385096e+02 1.929231262207031250e+02 -3.063537597656250000e+00 1.827220469713211060e-01 8.235294222831726074e-01 3.605732727050781250e+02
1.600000000000000000e+01 4.628153846153846303e+02 2.003371124267578125e+02 -3.019866943359375000e+00 1.233678385615348816e-01 9.411764740943908691e-01 2.671046752929687500e+02
2.800000000000000000e+01 4.890538461538462229e+02 2.066529388427734375e+02 -2.976165771484375000e+00 1.258605271577835083e-01 1.470588207244873047e+00 2.862102050781250000e+02
8.000000000000000000e+00 5.253769230769231626e+02 2.116477355957031250e+02 -2.932464599609375000e+00 1.586413234472274780e-01 1.588235259056091309e+00 3.218911437988281250e+02
2.800000000000000000e+01 5.521153846153844142e+02 2.222446594238281250e+02 -3.059631347656250000e+00 1.484630256891250610e-01 1.117647051811218262e+00 2.896652526855468750e+02
2.700000000000000000e+01 5.763461538461536975e+02 2.338408813476562500e+02 -3.357635498046875000e+00 1.332151591777801514e-01 7.647058963775634766e-01 2.380720977783203125e+02
1.900000000000000000e+01 6.050692307692305576e+02 2.391834869384765625e+02 -3.655639648437500000e+00 1.559539288282394409e-01 8.823529481887817383e-01 2.755950317382812500e+02
4.000000000000000000e+01 5.883307692307690786e+02 2.258867797851562500e+02 -3.953643798828125000e+00 1.357021033763885498e-01 1.411764740943908691e+00 2.114211730957031250e+02
2.600000000000000000e+01 5.678000000000000682e+02 2.029267272949218750e+02 -4.352935791015625000e+00 1.554270386695861816e-01 1.764705896377563477e+00 2.160815429687500000e+02
2.100000000000000000e+01 5.763000000000000682e+02 2.011348876953125000e+02 -4.785980224609375000e+00 1.905516237020492554e-01 8.235294222831726074e-01 2.469302368164062500e+02
5.800000000000000000e+01 6.049076923076922867e+02 2.134050445556640625e+02 -5.219055175781250000e+00 2.437982261180877686e-01 1.058823585510253906e+00 3.373306884765625000e+02
4.000000000000000000e+01 6.279615384615383391e+02 2.310873870849609375e+02 -5.652099609375000000e+00 2.521023154258728027e-01 1.823529362678527832e+00 3.124179077148437500e+02
5.900000000000000000e+01 6.697384615384614790e+02 2.928146362304687500e+02 -6.282348632812500000e+00 3.922818601131439209e-01 6.470588445663452148e-01 5.434771728515625000e+02
5.400000000000000000e+01 7.030000000000004547e+02 3.206759338378906250e+02 -6.597473144531250000e+00 7.377821803092956543e-01 2.941176593303680420e-01 9.686719970703125000e+02
1.400000000000000000e+01 6.934538461538460297e+02 3.369180603027343750e+02 -6.836944580078125000e+00 7.934449911117553711e-01 1.000000000000000000e+00 9.753572387695312500e+02
2.600000000000000000e+01 6.975769230769230944e+02 3.326000366210937500e+02 -6.849548339843750000e+00 7.436050772666931152e-01 1.000000000000000000e+00 9.171857910156250000e+02
2.800000000000000000e+01 7.083769230769230489e+02 3.323257751464843750e+02 -6.862152099609375000e+00 9.157198071479797363e-01 0.000000000000000000e+00 1.297739379882812500e+03
5.700000000000000000e+01 7.105307692307698062e+02 3.286798400878906250e+02 -6.874755859375000000e+00 7.075766324996948242e-01 5.294117927551269531e-01 7.565019531250000000e+02
5.200000000000000000e+01 6.662230769230766327e+02 2.910732727050781250e+02 -6.677612304687500000e+00 4.034671783447265625e-01 5.882353186607360840e-01 4.669564819335937500e+02
4.600000000000000000e+01 6.197846153846155630e+02 2.677838134765625000e+02 -6.270690917968750000e+00 2.327760607004165649e-01 0.000000000000000000e+00 2.825814819335937500e+02
2.700000000000000000e+01 5.820000000000000000e+02 2.411556854248046875e+02 -5.863769531250000000e+00 1.390112489461898804e-01 5.882353186607360840e-01 9.583340454101562500e+01
5.300000000000000000e+01 6.247076923076922412e+02 2.118054351806640625e+02 -5.008117675781250000e+00 6.059069037437438965e-01 7.058823704719543457e-01 6.769270629882812500e+02
2.100000000000000000e+01 6.378692307692303984e+02 2.073359527587890625e+02 -4.545440673828125000e+00 4.984976947307586670e-01 5.882353186607360840e-01 6.602786865234375000e+02
4.100000000000000000e+01 6.433538461538463480e+02 2.175964508056640625e+02 -4.082763671875000000e+00 1.462471932172775269e-01 1.411764740943908691e+00 2.082911224365234375e+02
6.400000000000000000e+01 6.628384615384615017e+02 2.162188873291015625e+02 -3.620056152343750000e+00 3.004017174243927002e-01 0.000000000000000000e+00 4.291841735839843750e+02
6.700000000000000000e+01 6.516076923076924459e+02 2.095282592773437500e+02 -3.230712890625000000e+00 9.999999776482582092e-03 4.117647111415863037e-01 1.938614959716796875e+02
3.500000000000000000e+01 6.454230769230770193e+02 2.044650573730468750e+02 -2.841369628906250000e+00 9.999999776482582092e-03 5.882352963089942932e-02 1.644514465332031250e+01
7.700000000000000000e+01 6.427307692307689422e+02 2.107911376953125000e+02 -2.102661132812500000e+00 3.366170823574066162e-01 0.000000000000000000e+00 5.491082153320312500e+02
5.800000000000000000e+01 6.215153846153845052e+02 2.677620849609375000e+02 -1.414276123046875000e+00 9.999999776482582092e-03 0.000000000000000000e+00 1.456587066650390625e+02
1.100000000000000000e+01 6.674923076923076906e+02 2.984744262695312500e+02 -1.279876708984375000e+00 9.999999776482582092e-03 5.882353186607360840e-01 7.177745056152343750e+01
1.400000000000000000e+01 8.257153846153840959e+02 3.633133850097656250e+02 8.503723144531250000e-01 0.000000000000000000e+00 0.000000000000000000e+00 7.815613555908203125e+01
2.100000000000000000e+01 8.113384615384619565e+02 3.964238281250000000e+02 3.412780761718750000e-01 0.000000000000000000e+00 0.000000000000000000e+00 3.543997497558593750e+02
2.600000000000000000e+01 8.707538461538462116e+02 4.244833068847656250e+02 3.443603515625000000e-01 0.000000000000000000e+00 0.000000000000000000e+00 3.281955566406250000e+02
3.200000000000000000e+01 9.326538461538468709e+02 4.304364624023437500e+02 8.596191406250000000e-01 0.000000000000000000e+00 0.000000000000000000e+00 1.688749694824218750e+02
2.000000000000000000e+00 1.855730769230769738e+03 1.138535156250000000e+02 1.547180175781250000e+00 0.000000000000000000e+00 2.941176593303680420e-01 1.282362915039062500e+03
0.000000000000000000e+00 1.420015384615384619e+03 1.997549247741699219e+01 1.138641357421875000e+00 9.999999776482582092e-03 0.000000000000000000e+00 1.820341186523437500e+03
1.800000000000000000e+01 1.115653846153846189e+03 2.239298629760742188e+01 7.301330566406250000e-01 0.000000000000000000e+00 5.882352963089942932e-02 9.160560913085937500e+02
4.000000000000000000e+01 8.167076923076923549e+02 4.989536285400390625e+01 2.458496093750000000e-01 0.000000000000000000e+00 0.000000000000000000e+00 1.219189819335937500e+03
4.800000000000000000e+01 6.171615384615383846e+02 6.735224914550781250e+01 -2.636413574218750000e-01 9.999999776482582092e-03 0.000000000000000000e+00 1.544017211914062500e+03
3.000000000000000000e+01 4.260769230769229807e+02 8.433101654052734375e+01 -7.731628417968750000e-01 0.000000000000000000e+00 0.000000000000000000e+00 1.122523559570312500e+03
2.300000000000000000e+01 3.578076923076923208e+02 1.101717529296875000e+02 -1.282684326171875000e+00 0.000000000000000000e+00 0.000000000000000000e+00 1.088967285156250000e+03
2.500000000000000000e+01 3.729692307692308191e+02 1.449091186523437500e+02 -1.548675537109375000e+00 0.000000000000000000e+00 5.294117927551269531e-01 1.183639892578125000e+03
3.700000000000000000e+01 4.227615384615384073e+02 1.728571166992187500e+02 -1.814666748046875000e+00 0.000000000000000000e+00 7.058823704719543457e-01 1.142759277343750000e+03
5.700000000000000000e+01 4.210538461538462798e+02 2.035898742675781250e+02 -2.080657958984375000e+00 0.000000000000000000e+00 0.000000000000000000e+00 6.825238647460937500e+02
4.700000000000000000e+01 5.336384615384616836e+02 2.085094604492187500e+02 -2.396759033203125000e+00 0.000000000000000000e+00 0.000000000000000000e+00 1.021844177246093750e+03
5.900000000000000000e+01 6.892769230769231399e+02 2.198855438232421875e+02 -2.863189697265625000e+00 0.000000000000000000e+00 0.000000000000000000e+00 1.251373779296875000e+03
5.300000000000000000e+01 1.090807692307692378e+03 3.171124267578125000e+02 -4.090759277343750000e+00 0.000000000000000000e+00 0.000000000000000000e+00 1.094031372070312500e+03
4.000000000000000000e+01 1.115984615384616063e+03 3.137572326660156250e+02 -4.131774902343750000e+00 0.000000000000000000e+00 0.000000000000000000e+00 1.940713012695312500e+03
2.000000000000000000e+00 1.090961538461538566e+03 3.034393920898437500e+02 -4.172760009765625000e+00 5.347923636436462402e-01 0.000000000000000000e+00 1.941091064453125000e+03
5.100000000000000000e+01 6.923461538461538112e+02 2.343082885742187500e+02 -2.682189941406250000e+00 9.999999776482582092e-03 2.941176593303680420e-01 1.920178222656250000e+03
5.700000000000000000e+01 6.441846153846155403e+02 2.265313110351562500e+02 -2.289581298828125000e+00 0.000000000000000000e+00 0.000000000000000000e+00 1.524180908203125000e+03
3.600000000000000000e+01 5.869846153846154948e+02 2.146467895507812500e+02 -1.896972656250000000e+00 0.000000000000000000e+00 0.000000000000000000e+00 1.225608032226562500e+03
5.000000000000000000e+00 3.926923076923076792e+02 9.652561187744140625e+01 8.758850097656250000e-01 0.000000000000000000e+00 2.941176593303680420e-01 7.581229858398437500e+02
3.000000000000000000e+00 3.797846153846153925e+02 9.070154571533203125e+01 1.105438232421875000e+00 0.000000000000000000e+00 5.882352963089942932e-02 7.669839477539062500e+02
6.000000000000000000e+00 3.758999999999999773e+02 9.758797454833984375e+01 1.334991455078125000e+00 0.000000000000000000e+00 0.000000000000000000e+00 6.926364746093750000e+02
1.000000000000000000e+00 3.866384615384616836e+02 1.104330596923828125e+02 1.328002929687500000e+00 0.000000000000000000e+00 0.000000000000000000e+00 6.803093261718750000e+02
3.700000000000000000e+01 4.841384615384613426e+02 1.696065979003906250e+02 -9.510803222656250000e-01 0.000000000000000000e+00 4.117647111415863037e-01 6.456119384765625000e+02
4.900000000000000000e+01 4.902307692307691127e+02 1.814937896728515625e+02 -8.706665039062500000e-01 0.000000000000000000e+00 0.000000000000000000e+00 5.800095825195312500e+02
5.500000000000000000e+01 5.044846153846153811e+02 1.966239929199218750e+02 -7.565917968750000000e-01 0.000000000000000000e+00 0.000000000000000000e+00 5.241331176757812500e+02
3.800000000000000000e+01 5.151230769230770647e+02 1.698224029541015625e+02 -6.425170898437500000e-01 0.000000000000000000e+00 0.000000000000000000e+00 5.744323120117187500e+02
6.000000000000000000e+00 5.341923076923076223e+02 1.374132690429687500e+02 -5.284729003906250000e-01 0.000000000000000000e+00 2.941176593303680420e-01 3.206966857910156250e+02
5.700000000000000000e+01 5.575615384615385892e+02 1.052882308959960938e+02 -4.620056152343750000e-01 0.000000000000000000e+00 1.352941155433654785e+00 3.237557067871093750e+02
2.000000000000000000e+01 5.440692307692310123e+02 8.302610778808593750e+01 -3.955383300781250000e-01 0.000000000000000000e+00 0.000000000000000000e+00 2.604508972167968750e+02
3.900000000000000000e+01 4.990846153846153470e+02 8.342372131347656250e+01 -2.948303222656250000e-01 0.000000000000000000e+00 0.000000000000000000e+00 2.791193847656250000e+02
4.200000000000000000e+01 4.903923076923074973e+02 8.625511169433593750e+01 -3.572387695312500000e-01 0.000000000000000000e+00 0.000000000000000000e+00 2.435746307373046875e+02
5.400000000000000000e+01 6.316153846153846416e+02 3.915502548217773438e+01 -8.883972167968750000e-01 0.000000000000000000e+00 0.000000000000000000e+00 2.335189056396484375e+02
3.700000000000000000e+01 6.434230769230773603e+02 4.364995574951171875e+01 -1.138519287109375000e+00 0.000000000000000000e+00 5.882352963089942932e-02 2.693585815429687500e+02
3.100000000000000000e+01 6.444384615384616382e+02 5.710276794433593750e+01 -1.388610839843750000e+00 0.000000000000000000e+00 2.352941185235977173e-01 3.071921386718750000e+02
2.600000000000000000e+01 6.496692307692303530e+02 8.648500061035156250e+01 -1.576721191406250000e+00 9.999999776482582092e-03 4.117647111415863037e-01 3.244425659179687500e+02
4.600000000000000000e+01 6.734923076923073495e+02 1.628732910156250000e+02 -1.911590576171875000e+00 9.999999776482582092e-03 4.705882370471954346e-01 3.464235229492187500e+02
2.900000000000000000e+01 7.246538461538464162e+02 1.730931396484375000e+02 -2.188690185546875000e+00 9.999999776482582092e-03 0.000000000000000000e+00 3.738237304687500000e+02
6.000000000000000000e+01 7.515846153846152902e+02 1.910910186767578125e+02 -2.407958984375000000e+00 9.999999776482582092e-03 5.882352963089942932e-02 3.921123962402343750e+02
5.500000000000000000e+01 7.732307692307693969e+02 2.055835876464843750e+02 -2.515747070312500000e+00 1.086587756872177124e-01 8.823529481887817383e-01 4.108261413574218750e+02
6.200000000000000000e+01 7.873615384615386574e+02 2.153695526123046875e+02 -2.617980957031250000e+00 1.127694249153137207e-01 0.000000000000000000e+00 3.906453247070312500e+02
3.600000000000000000e+01 7.957692307692306031e+02 2.234583435058593750e+02 -2.822448730468750000e+00 9.999999776482582092e-03 5.882353186607360840e-01 3.350610351562500000e+02
5.300000000000000000e+01 7.681999999999997044e+02 1.992367095947265625e+02 -3.055999755859375000e+00 1.096836999058723450e-01 5.882353186607360840e-01 2.918075866699218750e+02
5.700000000000000000e+01 7.455769230769230944e+02 1.220072097778320312e+02 -3.177612304687500000e+00 1.181697025895118713e-01 0.000000000000000000e+00 2.621456604003906250e+02
6.300000000000000000e+01 7.279769230769236401e+02 6.519104003906250000e+01 -3.299255371093750000e+00 1.233230829238891602e-01 2.941176593303680420e-01 2.520926513671875000e+02
4.600000000000000000e+01 7.101999999999999318e+02 4.062630462646484375e+01 -3.378906250000000000e+00 1.375659108161926270e-01 0.000000000000000000e+00 2.606851196289062500e+02
1.300000000000000000e+01 6.844538461538460297e+02 4.195874786376953125e+01 -3.510284423828125000e+00 1.201531291007995605e-01 0.000000000000000000e+00 2.086236114501953125e+02
1.700000000000000000e+01 6.656153846153843006e+02 4.518631362915039062e+01 -3.575958251953125000e+00 1.201978400349617004e-01 0.000000000000000000e+00 1.837758636474609375e+02
5.900000000000000000e+01 6.372076923076923549e+02 9.607110595703125000e+01 -3.369140625000000000e+00 1.367470026016235352e-01 5.294117927551269531e-01 1.554116058349609375e+02
3.200000000000000000e+01 6.221538461538460751e+02 1.515404357910156250e+02 -3.267242431640625000e+00 1.257717162370681763e-01 2.941176593303680420e-01 1.271269683837890625e+02
6.000000000000000000e+00 6.172846153846153356e+02 2.328933715820312500e+02 -3.066467285156250000e+00 1.201985552906990051e-01 0.000000000000000000e+00 8.603842926025390625e+01
3.800000000000000000e+01 6.066615384615383846e+02 2.749657592773437500e+02 -2.865692138671875000e+00 1.173500120639801025e-01 0.000000000000000000e+00 5.864216995239257812e+01
2.800000000000000000e+01 5.934076923076922867e+02 2.819871520996093750e+02 -2.664916992187500000e+00 1.144655197858810425e-01 0.000000000000000000e+00 4.468138504028320312e+01
2.400000000000000000e+01 5.785538461538461661e+02 2.800965576171875000e+02 -2.773864746093750000e+00 1.125414073467254639e-01 0.000000000000000000e+00 3.834385681152343750e+01
1.600000000000000000e+01 5.668384615384615017e+02 2.792833557128906250e+02 -3.192504882812500000e+00 1.027661785483360291e-01 0.000000000000000000e+00 8.456829071044921875e+00
1.400000000000000000e+01 6.888846153846154721e+02 2.973893127441406250e+02 -2.598663330078125000e+00 1.186616718769073486e-01 0.000000000000000000e+00 2.981931495666503906e+01
5.200000000000000000e+01 7.152307692307695106e+02 3.029861450195312500e+02 -2.871612548828125000e+00 1.451748162508010864e-01 4.117647111415863037e-01 1.307817840576171875e+02
3.500000000000000000e+01 7.376076923076921048e+02 3.102536621093750000e+02 -3.144561767578125000e+00 1.770375072956085205e-01 2.941176593303680420e-01 1.767404937744140625e+02
1.900000000000000000e+01 7.715999999999996817e+02 3.158474731445312500e+02 -3.415435791015625000e+00 2.117312997579574585e-01 5.882353186607360840e-01 2.339751586914062500e+02
5.100000000000000000e+01 7.862692307692307168e+02 3.212742309570312500e+02 -3.680145263671875000e+00 1.849405467510223389e-01 2.941176593303680420e-01 2.368056945800781250e+02
4.400000000000000000e+01 7.900384615384616609e+02 3.283442382812500000e+02 -3.944824218750000000e+00 1.907654553651809692e-01 9.411764740943908691e-01 2.749458007812500000e+02
4.500000000000000000e+01 7.955692307692307850e+02 3.420164184570312500e+02 -4.209503173828125000e+00 2.120041847229003906e-01 6.470588445663452148e-01 2.878169555664062500e+02
3.100000000000000000e+01 8.713153846153846871e+02 2.833893127441406250e+02 -4.615051269531250000e+00 2.757488489151000977e-01 7.058823704719543457e-01 3.833216552734375000e+02
2.300000000000000000e+01 8.922538461538465526e+02 2.720393981933593750e+02 -4.716033935546875000e+00 3.130624592304229736e-01 5.882353186607360840e-01 4.525880737304687500e+02
2.400000000000000000e+01 9.471076923076924459e+02 2.459023284912109375e+02 -4.668487548828125000e+00 4.119878113269805908e-01 6.470588445663452148e-01 5.373118896484375000e+02
5.300000000000000000e+01 9.793999999999997499e+02 2.288423309326171875e+02 -4.620941162109375000e+00 5.262298583984375000e-01 8.235294222831726074e-01 6.140061645507812500e+02
1.300000000000000000e+01 9.609923076923075769e+02 2.214296417236328125e+02 -4.573394775390625000e+00 4.324540495872497559e-01 2.941176593303680420e-01 6.834646606445312500e+02
3.400000000000000000e+01 9.935230769230765873e+02 2.198776550292968750e+02 -4.536773681640625000e+00 6.456978321075439453e-01 2.941176593303680420e-01 8.649734497070312500e+02
2.900000000000000000e+01 9.855538461538459387e+02 2.979705200195312500e+02 -4.449218750000000000e+00 3.652600944042205811e-01 5.882353186607360840e-01 6.627029418945312500e+02
5.200000000000000000e+01 9.791769230769234582e+02 4.282887268066406250e+02 -4.657836914062500000e+00 3.442216813564300537e-01 2.941176593303680420e-01 6.593026123046875000e+02
5.100000000000000000e+01 8.969230769230767919e+02 4.306560668945312500e+02 -4.706604003906250000e+00 3.013567030429840088e-01 2.941176593303680420e-01 5.849812011718750000e+02
1.600000000000000000e+01 7.997538461538459842e+02 4.396341857910156250e+02 -4.804168701171875000e+00 3.348051607608795166e-01 0.000000000000000000e+00 5.894629516601562500e+02
4.600000000000000000e+01 8.382000000000001592e+02 4.066639099121093750e+02 -4.767791748046875000e+00 4.173228740692138672e-01 0.000000000000000000e+00 6.789588623046875000e+02
4.100000000000000000e+01 8.858615384615382027e+02 3.186788635253906250e+02 -4.703063964843750000e+00 3.099287748336791992e-01 0.000000000000000000e+00 5.970218505859375000e+02
2.300000000000000000e+01 9.039692307692309896e+02 2.632793884277343750e+02 -4.638336181640625000e+00 2.994574606418609619e-01 0.000000000000000000e+00 5.318776245117187500e+02
4.700000000000000000e+01 9.292999999999994998e+02 2.421229858398437500e+02 -4.573608398437500000e+00 2.160229980945587158e-01 2.352941185235977173e-01 4.947520446777343750e+02
4.000000000000000000e+01 9.503230769230772239e+02 2.349468841552734375e+02 -4.349700927734375000e+00 2.505666613578796387e-01 0.000000000000000000e+00 5.462098388671875000e+02
4.700000000000000000e+01 9.822999999999999545e+02 2.389172668457031250e+02 -4.125793457031250000e+00 2.445173114538192749e-01 0.000000000000000000e+00 5.274482421875000000e+02
6.800000000000000000e+01 1.022969230769230990e+03 2.764324340820312500e+02 -3.640930175781250000e+00 1.899333000183105469e-01 0.000000000000000000e+00 4.749559326171875000e+02
6.800000000000000000e+01 1.048123076923076724e+03 3.309845886230468750e+02 -3.268737792968750000e+00 1.776243299245834351e-01 0.000000000000000000e+00 4.361133728027343750e+02
6.900000000000000000e+01 1.067169230769231717e+03 4.080858154296875000e+02 -2.896545410156250000e+00 1.389860808849334717e-01 2.352941185235977173e-01 3.710461730957031250e+02
6.700000000000000000e+01 1.117169230769230353e+03 4.217579956054687500e+02 -2.177520751953125000e+00 1.532130539417266846e-01 2.941176593303680420e-01 4.391159057617187500e+02
1.300000000000000000e+01 1.136723076923076405e+03 4.568624877929687500e+02 -1.855987548828125000e+00 1.430359482765197754e-01 0.000000000000000000e+00 4.383841857910156250e+02
4.500000000000000000e+01 1.167907692307692741e+03 4.555242309570312500e+02 -1.534454345703125000e+00 1.641822308301925659e-01 0.000000000000000000e+00 5.152407226562500000e+02
6.100000000000000000e+01 1.172469230769231444e+03 4.513030090332031250e+02 -1.212951660156250000e+00 9.999999776482582092e-03 0.000000000000000000e+00 3.617422485351562500e+02
5.100000000000000000e+01 1.195646153846153993e+03 4.142616882324218750e+02 -3.425598144531250000e-01 9.999999776482582092e-03 0.000000000000000000e+00 3.579460144042968750e+02
3.000000000000000000e+01 1.181707692307692014e+03 3.319391174316406250e+02 -5.526733398437500000e-02 9.999999776482582092e-03 0.000000000000000000e+00 2.046462249755859375e+02
1.800000000000000000e+01 1.500100000000000819e+03 5.303082885742187500e+02 1.053088378906250000e+01 0.000000000000000000e+00 0.000000000000000000e+00 5.589170837402343750e+01
3.000000000000000000e+01 1.328723076923077087e+03 5.013312683105468750e+02 1.026748657226562500e+01 0.000000000000000000e+00 0.000000000000000000e+00 2.852739562988281250e+02
2.800000000000000000e+01 1.094076923076922867e+03 4.662019042968750000e+02 1.016516113281250000e+01 0.000000000000000000e+00 0.000000000000000000e+00 1.303778991699218750e+02
1.200000000000000000e+01 1.068038461538461661e+03 4.301340026855468750e+02 1.006286621093750000e+01 0.000000000000000000e+00 0.000000000000000000e+00 1.484083557128906250e+02
4.400000000000000000e+01 1.140292307692307759e+03 3.916347961425781250e+02 9.960540771484375000e+00 0.000000000000000000e+00 0.000000000000000000e+00 1.590385284423828125e+02
2.700000000000000000e+01 1.080992307692307577e+03 3.856210937500000000e+02 9.955627441406250000e+00 0.000000000000000000e+00 0.000000000000000000e+00 4.089433288574218750e+01
1.000000000000000000e+01 1.817484615384615381e+03 4.782409362792968750e+02 9.345855712890625000e+00 0.000000000000000000e+00 0.000000000000000000e+00 4.596254577636718750e+02
3.700000000000000000e+01 1.187215384615384664e+03 4.687846069335937500e+02 9.356536865234375000e+00 0.000000000000000000e+00 0.000000000000000000e+00 3.738660888671875000e+02
2.800000000000000000e+01 8.170076923076924231e+02 3.340620422363281250e+02 9.367187500000000000e+00 0.000000000000000000e+00 0.000000000000000000e+00 8.530889892578125000e+01
1.300000000000000000e+01 8.700769230769237765e+02 3.315510864257812500e+02 8.568969726562500000e+00 0.000000000000000000e+00 0.000000000000000000e+00 2.851712226867675781e+00
2.800000000000000000e+01 7.864076923076925141e+02 3.236273498535156250e+02 8.396362304687500000e+00 0.000000000000000000e+00 0.000000000000000000e+00 1.267073726654052734e+01
6.000000000000000000e+00 7.518923076923076678e+02 3.077421569824218750e+02 7.728698730468750000e+00 0.000000000000000000e+00 0.000000000000000000e+00 5.096618652343750000e+01
6.200000000000000000e+01 6.861000000000001364e+02 2.935698852539062500e+02 7.471038818359375000e+00 0.000000000000000000e+00 0.000000000000000000e+00 4.051778411865234375e+01
6.200000000000000000e+01 6.869307692307688740e+02 2.849539794921875000e+02 7.399993896484375000e+00 0.000000000000000000e+00 0.000000000000000000e+00 8.298051452636718750e+01
5.800000000000000000e+01 5.895153846153846189e+02 2.190892791748046875e+02 7.182098388671875000e+00 0.000000000000000000e+00 2.941176593303680420e-01 5.734668731689453125e+01
5.400000000000000000e+01 5.920307692307688967e+02 2.513477172851562500e+02 7.094787597656250000e+00 0.000000000000000000e+00 2.352941185235977173e-01 4.359507751464843750e+01
5.700000000000000000e+01 5.790384615384614335e+02 2.496548919677734375e+02 7.033935546875000000e+00 0.000000000000000000e+00 0.000000000000000000e+00 6.899497985839843750e+01
1.300000000000000000e+01 5.712307692307691696e+02 2.486248321533203125e+02 6.973114013671875000e+00 0.000000000000000000e+00 2.941176593303680420e-01 7.112743377685546875e+01
9.000000000000000000e+00 5.670153846153846189e+02 2.450494689941406250e+02 6.452392578125000000e+00 0.000000000000000000e+00 0.000000000000000000e+00 1.245425643920898438e+02
1.600000000000000000e+01 5.499615384615383391e+02 2.443661804199218750e+02 6.319915771484375000e+00 0.000000000000000000e+00 0.000000000000000000e+00 1.000843276977539062e+02
4.200000000000000000e+01 5.321923076923078497e+02 1.922254638671875000e+02 5.863281250000000000e+00 0.000000000000000000e+00 0.000000000000000000e+00 1.162805023193359375e+02
1.100000000000000000e+01 5.539076923076922867e+02 2.214779663085937500e+02 5.565521240234375000e+00 0.000000000000000000e+00 0.000000000000000000e+00 1.349875183105468750e+02
7.200000000000000000e+01 5.568461538461536975e+02 2.329494018554687500e+02 5.327239990234375000e+00 0.000000000000000000e+00 0.000000000000000000e+00 1.645419616699218750e+02
6.600000000000000000e+01 5.938615384615387711e+02 2.419183807373046875e+02 5.151580810546875000e+00 0.000000000000000000e+00 5.882353186607360840e-01 1.878954620361328125e+02
6.900000000000000000e+01 6.388923076923078952e+02 2.847081604003906250e+02 5.046386718750000000e+00 0.000000000000000000e+00 5.294117927551269531e-01 1.542705688476562500e+02
3.100000000000000000e+01 6.398769230769232763e+02 2.874360046386718750e+02 5.048065185546875000e+00 0.000000000000000000e+00 1.058823585510253906e+00 1.451468811035156250e+02
5.800000000000000000e+01 6.483230769230766555e+02 2.951674499511718750e+02 4.935241699218750000e+00 0.000000000000000000e+00 0.000000000000000000e+00 1.446024322509765625e+02
2.500000000000000000e+01 6.433076923076922640e+02 2.886579895019531250e+02 4.784362792968750000e+00 0.000000000000000000e+00 1.117647051811218262e+00 1.408739624023437500e+02
9.000000000000000000e+00 6.507538461538460979e+02 2.795152893066406250e+02 4.636962890625000000e+00 0.000000000000000000e+00 1.176470637321472168e+00 1.419477081298828125e+02
3.000000000000000000e+01 6.545692307692307850e+02 2.758852844238281250e+02 4.489562988281250000e+00 0.000000000000000000e+00 7.647058963775634766e-01 1.477386779785156250e+02
1.300000000000000000e+01 6.140230769230767010e+02 2.826568603515625000e+02 4.054687500000000000e+00 0.000000000000000000e+00 5.294117927551269531e-01 2.083753051757812500e+02
1.300000000000000000e+01 6.089307692307694424e+02 2.695244140625000000e+02 3.760589599609375000e+00 0.000000000000000000e+00 2.941176593303680420e-01 1.811625671386718750e+02
6.000000000000000000e+00 6.482846153846155630e+02 2.599634704589843750e+02 3.743713378906250000e+00 0.000000000000000000e+00 2.176470518112182617e+00 2.340020904541015625e+02
5.000000000000000000e+00 5.476384615384615699e+02 2.139557800292968750e+02 3.467041015625000000e+00 0.000000000000000000e+00 2.117647171020507812e+00 1.167706604003906250e+02
5.000000000000000000e+01 5.300615384615385892e+02 1.831909942626953125e+02 3.173431396484375000e+00 0.000000000000000000e+00 0.000000000000000000e+00 2.309318084716796875e+02
1.000000000000000000e+00 5.267692307692307168e+02 1.802683105468750000e+02 3.418609619140625000e+00 0.000000000000000000e+00 5.882353186607360840e-01 2.679737854003906250e+02
1.000000000000000000e+00 5.047846153846154493e+02 1.633744812011718750e+02 3.752349853515625000e+00 0.000000000000000000e+00 2.470588207244873047e+00 1.045621566772460938e+02
4.900000000000000000e+01 4.193076923076922640e+02 2.014065856933593750e+02 1.095092773437500000e+00 0.000000000000000000e+00 0.000000000000000000e+00 4.092511596679687500e+02
2.300000000000000000e+01 3.978615384615383164e+02 2.028348693847656250e+02 9.949340820312500000e-01 0.000000000000000000e+00 0.000000000000000000e+00 5.444112548828125000e+02
4.300000000000000000e+01 3.906538461538462457e+02 1.958770446777343750e+02 8.947448730468750000e-01 0.000000000000000000e+00 0.000000000000000000e+00 6.894561767578125000e+02
5.000000000000000000e+00 3.615999999999999659e+02 1.612451477050781250e+02 8.348083496093750000e-01 0.000000000000000000e+00 1.470588207244873047e+00 3.505925598144531250e+02
0.000000000000000000e+00 3.416999999999998749e+02 1.330976257324218750e+02 1.099731445312500000e+00 0.000000000000000000e+00 1.705882310867309570e+00 3.003975219726562500e+02
3.000000000000000000e+00 3.403999999999999773e+02 1.345936584472656250e+02 1.256103515625000000e+00 0.000000000000000000e+00 2.588235378265380859e+00 2.595707092285156250e+02
0.000000000000000000e+00 3.317769230769230830e+02 1.210104370117187500e+02 1.549591064453125000e+00 0.000000000000000000e+00 1.764705896377563477e+00 2.140322570800781250e+02
3.000000000000000000e+00 3.206230769230768942e+02 1.094573364257812500e+02 1.062408447265625000e+00 0.000000000000000000e+00 1.470588207244873047e+00 3.821189880371093750e+02
1.000000000000000000e+00 3.337461538461539021e+02 1.166135177612304688e+02 1.075836181640625000e+00 0.000000000000000000e+00 2.647058725357055664e+00 2.594867858886718750e+02
2.000000000000000000e+00 3.319846153846154948e+02 1.181045989990234375e+02 1.138336181640625000e+00 0.000000000000000000e+00 2.823529481887817383e+00 2.344260406494140625e+02
1.000000000000000000e+00 3.357538461538460979e+02 1.193858108520507812e+02 1.200866699218750000e+00 0.000000000000000000e+00 2.941176414489746094e+00 2.428062896728515625e+02
1.000000000000000000e+00 3.349307692307692719e+02 1.199154968261718750e+02 1.263366699218750000e+00 0.000000000000000000e+00 2.235294103622436523e+00 1.910795135498046875e+02
0.000000000000000000e+00 3.308461538461539249e+02 1.202126998901367188e+02 1.326873779296875000e+00 0.000000000000000000e+00 2.411764621734619141e+00 9.396917724609375000e+01
0.000000000000000000e+00 3.184153846153846530e+02 1.153964843750000000e+02 1.459625244140625000e+00 0.000000000000000000e+00 2.000000000000000000e+00 8.773937988281250000e+01
0.000000000000000000e+00 3.066615384615383277e+02 1.112995834350585938e+02 1.526031494140625000e+00 0.000000000000000000e+00 2.352941274642944336e+00 1.183935470581054688e+02
1.000000000000000000e+00 2.901769230769230603e+02 1.092875900268554688e+02 1.570831298828125000e+00 0.000000000000000000e+00 2.647058725357055664e+00 1.234984893798828125e+02
1.000000000000000000e+00 2.848538461538461206e+02 1.110271911621093750e+02 1.594085693359375000e+00 0.000000000000000000e+00 2.294117689132690430e+00 1.140309066772460938e+02
3.000000000000000000e+00 2.788307692307693060e+02 1.149682388305664062e+02 1.617370605468750000e+00 0.000000000000000000e+00 2.176470518112182617e+00 1.095680465698242188e+02
4.000000000000000000e+00 2.814153846153846530e+02 1.183967895507812500e+02 1.640625000000000000e+00 0.000000000000000000e+00 2.000000000000000000e+00 1.056818466186523438e+02
1.000000000000000000e+00 2.717538461538460410e+02 1.197219314575195312e+02 1.648681640625000000e+00 0.000000000000000000e+00 2.529411792755126953e+00 1.019334945678710938e+02
1.000000000000000000e+00 2.675615384615385324e+02 1.192540283203125000e+02 1.651672363281250000e+00 0.000000000000000000e+00 2.352941274642944336e+00 1.285410308837890625e+02
1.000000000000000000e+00 2.761615384615384414e+02 1.207440109252929688e+02 1.657684326171875000e+00 0.000000000000000000e+00 1.411764740943908691e+00 1.249945220947265625e+02
5.600000000000000000e+01 5.067307692307695106e+02 2.139107360839843750e+02 5.767822265625000000e-01 0.000000000000000000e+00 5.882352963089942932e-02 1.929127807617187500e+02
9.000000000000000000e+00 5.255230769230769283e+02 2.285882873535156250e+02 -3.132324218750000000e-01 0.000000000000000000e+00 1.588235259056091309e+00 2.533611297607421875e+02
4.000000000000000000e+00 5.229307692307692150e+02 2.424888305664062500e+02 -7.888488769531250000e-01 0.000000000000000000e+00 2.411764621734619141e+00 2.900356750488281250e+02
1.000000000000000000e+01 5.232230769230770875e+02 2.734343872070312500e+02 -1.264434814453125000e+00 0.000000000000000000e+00 9.411764740943908691e-01 2.467559661865234375e+02
5.800000000000000000e+01 5.297692307692304894e+02 3.106740722656250000e+02 -1.712982177734375000e+00 0.000000000000000000e+00 5.882352963089942932e-02 3.736875610351562500e+02
4.900000000000000000e+01 5.286538461538461888e+02 3.347601013183593750e+02 -2.161529541015625000e+00 0.000000000000000000e+00 0.000000000000000000e+00 4.315669555664062500e+02
5.900000000000000000e+01 5.251076923076924459e+02 3.206367187500000000e+02 -2.610076904296875000e+00 0.000000000000000000e+00 0.000000000000000000e+00 5.237344360351562500e+02
5.100000000000000000e+01 5.081846153846154834e+02 2.874322509765625000e+02 -2.986541748046875000e+00 0.000000000000000000e+00 0.000000000000000000e+00 6.101287841796875000e+02
5.900000000000000000e+01 4.986461538461539362e+02 2.719796447753906250e+02 -3.146759033203125000e+00 9.999999776482582092e-03 2.941176593303680420e-01 7.220399780273437500e+02
4.500000000000000000e+01 4.880384615384615472e+02 2.561632080078125000e+02 -3.306976318359375000e+00 9.999999776482582092e-03 0.000000000000000000e+00 9.454376220703125000e+02
6.000000000000000000e+00 4.648846153846154721e+02 2.434455718994140625e+02 -3.467193603515625000e+00 0.000000000000000000e+00 6.470588445663452148e-01 5.430382690429687500e+02
5.800000000000000000e+01 4.787076923076921275e+02 2.321863555908203125e+02 -3.493408203125000000e+00 9.999999776482582092e-03 1.588235259056091309e+00 5.600599365234375000e+02
4.900000000000000000e+01 5.001923076923077360e+02 2.232720031738281250e+02 -3.385589599609375000e+00 1.924369335174560547e-01 1.000000000000000000e+00 1.007149108886718750e+03
6.800000000000000000e+01 5.429076923076926278e+02 2.198240203857421875e+02 -3.277801513671875000e+00 2.413489073514938354e-01 2.941176593303680420e-01 8.699202880859375000e+02
6.700000000000000000e+01 6.105923076923074859e+02 2.309170074462890625e+02 -3.170013427734375000e+00 1.773418337106704712e-01 5.882352963089942932e-02 1.206719970703125000e+03
6.400000000000000000e+01 7.043461538461542659e+02 2.663126525878906250e+02 -3.214965820312500000e+00 1.921911090612411499e-01 0.000000000000000000e+00 1.019932434082031250e+03
6.600000000000000000e+01 7.926153846153847553e+02 3.361568603515625000e+02 -3.310852050781250000e+00 3.023690283298492432e-01 0.000000000000000000e+00 1.128067016601562500e+03
6.300000000000000000e+01 9.284692307692304212e+02 3.769064941406250000e+02 -3.406707763671875000e+00 5.034700632095336914e-01 0.000000000000000000e+00 1.537209838867187500e+03
2.000000000000000000e+01 8.601769230769231172e+02 3.180032348632812500e+02 -3.502593994140625000e+00 8.939266800880432129e-01 0.000000000000000000e+00 1.652050170898437500e+03
4.600000000000000000e+01 7.777461538461539021e+02 2.742797851562500000e+02 -3.833374023437500000e+00 5.429456233978271484e-01 0.000000000000000000e+00 1.440585937500000000e+03
6.900000000000000000e+01 6.788538461538462343e+02 2.325435485839843750e+02 -4.164154052734375000e+00 3.729951381683349609e-01 0.000000000000000000e+00 1.325064331054687500e+03
5.500000000000000000e+01 6.124384615384614108e+02 1.890443572998046875e+02 -4.494934082031250000e+00 5.639112591743469238e-01 1.176470592617988586e-01 1.269323120117187500e+03
6.400000000000000000e+01 5.599076923076925141e+02 1.535036621093750000e+02 -4.921020507812500000e+00 2.438851892948150635e-01 1.764705926179885864e-01 9.853666381835937500e+02
5.200000000000000000e+01 5.312000000000000455e+02 1.380893859863281250e+02 -5.633026123046875000e+00 4.263648390769958496e-01 1.764705926179885864e-01 1.146633422851562500e+03
5.400000000000000000e+01 5.089384615384614676e+02 1.407702941894531250e+02 -6.345031738281250000e+00 6.612716913223266602e-01 4.705882370471954346e-01 1.415222412109375000e+03
5.900000000000000000e+01 4.727615384615384073e+02 1.529883880615234375e+02 -7.057037353515625000e+00 3.527311980724334717e-01 8.235294222831726074e-01 1.209316650390625000e+03
3.800000000000000000e+01 4.683384615384617859e+02 1.702627563476562500e+02 -7.623168945312500000e+00 6.730391979217529297e-01 0.000000000000000000e+00 1.338808471679687500e+03
2.500000000000000000e+01 4.893000000000004093e+02 1.711029205322265625e+02 -8.463714599609375000e+00 6.642976403236389160e-01 2.352941185235977173e-01 1.754043823242187500e+03
4.600000000000000000e+01 4.901769230769232308e+02 1.564609069824218750e+02 -8.254882812500000000e+00 6.193462014198303223e-01 5.882353186607360840e-01 1.793967285156250000e+03
1.600000000000000000e+01 4.865615384615380776e+02 1.837038879394531250e+02 -7.835357666015625000e+00 8.058188557624816895e-01 2.941176593303680420e-01 1.718072753906250000e+03
1.000000000000000000e+01 4.808076923076922640e+02 1.922471313476562500e+02 -7.415832519531250000e+00 5.668660402297973633e-01 4.117647111415863037e-01 1.555730957031250000e+03
5.700000000000000000e+01 4.934538461538461434e+02 1.844970245361328125e+02 -6.546417236328125000e+00 3.434205949306488037e-01 5.882353186607360840e-01 1.022163757324218750e+03
1.200000000000000000e+01 4.979615384615384528e+02 1.789936676025390625e+02 -5.676971435546875000e+00 9.999999776482582092e-03 7.647058963775634766e-01 6.185183715820312500e+02
3.400000000000000000e+01 5.404307692307691013e+02 1.852271728515625000e+02 -4.807556152343750000e+00 9.999999776482582092e-03 2.235294103622436523e+00 4.933523864746093750e+02
3.500000000000000000e+01 5.738923076923076678e+02 1.789297180175781250e+02 -4.018737792968750000e+00 9.999999776482582092e-03 2.411764621734619141e+00 4.583159484863281250e+02
5.200000000000000000e+01 5.521769230769231172e+02 1.608858642578125000e+02 -2.924774169921875000e+00 9.999999776482582092e-03 1.529411792755126953e+00 5.631856689453125000e+02
8.000000000000000000e+00 5.089384615384615813e+02 1.568876800537109375e+02 -2.377777099609375000e+00 9.999999776482582092e-03 1.117647051811218262e+00 5.417351684570312500e+02
3.900000000000000000e+01 4.926000000000001364e+02 1.593044586181640625e+02 -2.082672119140625000e+00 1.546061038970947266e-01 1.176470637321472168e+00 6.664320068359375000e+02
3.800000000000000000e+01 4.593307692307694765e+02 1.581353759765625000e+02 -2.039428710937500000e+00 2.578606903553009033e-01 8.823529481887817383e-01 8.652775268554687500e+02
3.200000000000000000e+01 4.268153846153845734e+02 1.492508239746093750e+02 -1.996185302734375000e+00 2.727797031402587891e-01 1.647058844566345215e+00 8.909042968750000000e+02
5.300000000000000000e+01 3.613076923076922640e+02 1.642884216308593750e+02 -4.294860839843750000e+00 1.377546191215515137e-01 0.000000000000000000e+00 6.520461425781250000e+02
5.300000000000000000e+01 3.998692307692306258e+02 1.644715270996093750e+02 -5.150421142578125000e+00 8.207916021347045898e-01 0.000000000000000000e+00 1.374276245117187500e+03
6.900000000000000000e+01 4.087615384615384073e+02 1.576371002197265625e+02 -5.726654052734375000e+00 5.509188771247863770e-01 4.705882370471954346e-01 1.126952636718750000e+03
3.300000000000000000e+01 4.234692307692306485e+02 1.638583831787109375e+02 -6.302886962890625000e+00 5.740540623664855957e-01 1.470588207244873047e+00 1.165743164062500000e+03
3.900000000000000000e+01 4.126769230769230035e+02 1.845143737792968750e+02 -6.879150390625000000e+00 3.439433574676513672e-01 6.470588445663452148e-01 1.015405639648437500e+03
2.000000000000000000e+01 4.028307692307692491e+02 1.800742492675781250e+02 -7.306365966796875000e+00 5.390160083770751953e-01 1.470588207244873047e+00 1.201053710937500000e+03
2.800000000000000000e+01 3.872692307692305462e+02 1.483328399658203125e+02 -7.286499023437500000e+00 4.934814870357513428e-01 1.117647051811218262e+00 1.056310668945312500e+03
1.600000000000000000e+01 3.735384615384616609e+02 1.376597747802734375e+02 -7.246734619140625000e+00 4.314874410629272461e-01 1.529411792755126953e+00 9.923726806640625000e+02
2.200000000000000000e+01 3.341384615384616268e+02 1.433499145507812500e+02 -6.614959716796875000e+00 2.487693727016448975e-01 1.294117689132690430e+00 9.627055053710937500e+02
1.700000000000000000e+01 3.665384615384616041e+02 1.367630920410156250e+02 -6.200408935546875000e+00 6.293699145317077637e-01 1.705882310867309570e+00 1.170828735351562500e+03
3.500000000000000000e+01 3.826923076923077360e+02 1.303482666015625000e+02 -5.785858154296875000e+00 5.288494825363159180e-01 1.647058844566345215e+00 1.127331176757812500e+03
3.900000000000000000e+01 3.799923076923076906e+02 1.190392227172851562e+02 -5.497222900390625000e+00 4.757279455661773682e-01 1.117647051811218262e+00 9.475165405273437500e+02
2.800000000000000000e+01 3.748461538461540385e+02 1.140067977905273438e+02 -5.250549316406250000e+00 3.327817022800445557e-01 1.588235259056091309e+00 8.787794189453125000e+02
1.100000000000000000e+01 3.700538461538461661e+02 1.218315582275390625e+02 -5.003906250000000000e+00 3.241931200027465820e-01 1.705882310867309570e+00 7.432917480468750000e+02
3.600000000000000000e+01 3.837230769230768033e+02 1.205235977172851562e+02 -4.757232666015625000e+00 4.852472543716430664e-01 1.470588207244873047e+00 8.998568725585937500e+02
3.800000000000000000e+01 3.874076923076923435e+02 1.269207000732421875e+02 -4.875305175781250000e+00 3.301568627357482910e-01 2.529411792755126953e+00 7.371243896484375000e+02
3.300000000000000000e+01 3.961461538461538794e+02 1.259229812622070312e+02 -4.993408203125000000e+00 3.329392373561859131e-01 1.882352948188781738e+00 7.140493774414062500e+02
2.500000000000000000e+01 4.042307692307693969e+02 1.386834869384765625e+02 -5.111480712890625000e+00 5.593962669372558594e-01 1.352941155433654785e+00 8.234729003906250000e+02
4.700000000000000000e+01 3.956538461538463594e+02 1.491308441162109375e+02 -5.254058837890625000e+00 4.297252297401428223e-01 1.235294103622436523e+00 7.978363037109375000e+02
2.700000000000000000e+01 4.014923076923075200e+02 1.795776367187500000e+02 -5.686309814453125000e+00 4.637817144393920898e-01 1.352941155433654785e+00 7.425972900390625000e+02
5.700000000000000000e+01 4.056230769230768374e+02 1.919150238037109375e+02 -5.902465820312500000e+00 5.707597136497497559e-01 1.294117689132690430e+00 8.161031494140625000e+02
6.100000000000000000e+01 4.056000000000000227e+02 1.986533813476562500e+02 -5.988708496093750000e+00 3.322481811046600342e-01 2.941176593303680420e-01 6.047319946289062500e+02
6.400000000000000000e+01 4.176230769230770079e+02 2.078880767822265625e+02 -5.945098876953125000e+00 4.201741516590118408e-01 0.000000000000000000e+00 6.990781250000000000e+02
1.600000000000000000e+01 4.331692307692307509e+02 2.154492492675781250e+02 -5.901458740234375000e+00 5.641587376594543457e-01 5.294117927551269531e-01 7.949762573242187500e+02
2.300000000000000000e+01 4.253384615384614449e+02 2.188182067871093750e+02 -5.857849121093750000e+00 3.490532934665679932e-01 0.000000000000000000e+00 6.464097900390625000e+02
3.100000000000000000e+01 4.390923076923078838e+02 2.172094421386718750e+02 -5.645782470703125000e+00 4.841967523097991943e-01 0.000000000000000000e+00 5.804558105468750000e+02
4.400000000000000000e+01 4.502230769230768033e+02 2.213902740478515625e+02 -5.377563476562500000e+00 5.361374616622924805e-01 0.000000000000000000e+00 6.462446289062500000e+02
3.400000000000000000e+01 4.686307692307692037e+02 2.211184234619140625e+02 -5.109344482421875000e+00 4.621712863445281982e-01 2.941176593303680420e-01 6.271054077148437500e+02
5.100000000000000000e+01 4.806230769230767237e+02 2.137422180175781250e+02 -4.841156005859375000e+00 4.368309378623962402e-01 4.705882370471954346e-01 5.887023925781250000e+02
5.600000000000000000e+01 4.729461538461539476e+02 2.042203063964843750e+02 -4.543457031250000000e+00 3.693859279155731201e-01 5.882352963089942932e-02 5.001271667480468750e+02
4.600000000000000000e+01 4.715999999999999659e+02 1.998674621582031250e+02 -4.245788574218750000e+00 4.879790544509887695e-01 5.882352963089942932e-02 6.458042602539062500e+02
2.600000000000000000e+01 4.655692307692306713e+02 2.005866851806640625e+02 -3.948120117187500000e+00 2.038011401891708374e-01 5.882353186607360840e-01 3.352034301757812500e+02
3.000000000000000000e+01 4.607999999999999545e+02 1.987645263671875000e+02 -3.716644287109375000e+00 2.222853302955627441e-01 1.411764740943908691e+00 3.603043823242187500e+02
3.600000000000000000e+01 4.687923076923079293e+02 1.999608764648437500e+02 -3.683898925781250000e+00 1.975085139274597168e-01 1.235294103622436523e+00 3.030542907714843750e+02
2.800000000000000000e+01 4.965384615384614904e+02 2.042020568847656250e+02 -3.651123046875000000e+00 1.886959671974182129e-01 1.764705896377563477e+00 3.195805969238281250e+02
3.300000000000000000e+01 5.208384615384616154e+02 2.110524597167968750e+02 -3.618347167968750000e+00 1.871081292629241943e-01 1.470588207244873047e+00 2.940070190429687500e+02
2.900000000000000000e+01 5.400230769230770420e+02 2.277614746093750000e+02 -3.752685546875000000e+00 1.662268787622451782e-01 1.058823585510253906e+00 2.238945617675781250e+02
2.500000000000000000e+01 5.717153846153843233e+02 2.419881591796875000e+02 -4.054138183593750000e+00 1.986549198627471924e-01 8.823529481887817383e-01 3.035402221679687500e+02
4.000000000000000000e+01 5.903153846153849145e+02 2.430711212158203125e+02 -4.355590820312500000e+00 2.022651582956314087e-01 1.058823585510253906e+00 3.122271423339843750e+02
4.900000000000000000e+01 5.834692307692308759e+02 2.339132690429687500e+02 -4.657043457031250000e+00 1.857509464025497437e-01 1.235294103622436523e+00 2.483006896972656250e+02
3.500000000000000000e+01 5.658153846153844597e+02 2.173930358886718750e+02 -5.047729492187500000e+00 2.733844816684722900e-01 1.058823585510253906e+00 3.362568054199218750e+02
2.900000000000000000e+01 5.776923076923073950e+02 2.185638275146484375e+02 -5.468139648437500000e+00 2.397228181362152100e-01 1.000000000000000000e+00 2.706803283691406250e+02
3.000000000000000000e+01 6.041076923076924459e+02 2.328984680175781250e+02 -5.888549804687500000e+00 2.972935736179351807e-01 1.058823585510253906e+00 3.437188720703125000e+02
1.900000000000000000e+01 6.316769230769234582e+02 2.546419982910156250e+02 -6.308959960937500000e+00 3.825841546058654785e-01 1.000000000000000000e+00 3.733165283203125000e+02
2.200000000000000000e+01 6.449846153846151537e+02 2.793055725097656250e+02 -6.564605712890625000e+00 4.006689190864562988e-01 3.529411852359771729e-01 4.367431335449218750e+02
7.000000000000000000e+01 6.634692307692305349e+02 2.944128417968750000e+02 -6.820220947265625000e+00 5.716885924339294434e-01 5.882352963089942932e-02 5.747363281250000000e+02
5.600000000000000000e+01 6.865615384615382482e+02 3.080039062500000000e+02 -7.075836181640625000e+00 5.679397583007812500e-01 2.941176593303680420e-01 6.387772827148437500e+02
1.700000000000000000e+01 6.952769230769231399e+02 3.134838867187500000e+02 -7.252136230468750000e+00 8.600563406944274902e-01 8.823529481887817383e-01 1.085663330078125000e+03
3.300000000000000000e+01 7.023461538461536975e+02 3.209621582031250000e+02 -7.190460205078125000e+00 7.384014129638671875e-01 5.294117927551269531e-01 8.351943359375000000e+02
2.600000000000000000e+01 7.054615384615384528e+02 3.284229125976562500e+02 -7.128753662109375000e+00 8.812175393104553223e-01 1.176470592617988586e-01 1.037280639648437500e+03
1.900000000000000000e+01 7.130307692307690104e+02 3.297730102539062500e+02 -7.067047119140625000e+00 9.700497984886169434e-01 0.000000000000000000e+00 1.526672363281250000e+03
5.900000000000000000e+01 6.933538461538463480e+02 2.947069702148437500e+02 -6.799041748046875000e+00 8.125079870223999023e-01 6.470588445663452148e-01 8.661310424804687500e+02
3.100000000000000000e+01 6.542384615384614790e+02 2.759068603515625000e+02 -6.324676513671875000e+00 3.216453194618225098e-01 0.000000000000000000e+00 3.175918579101562500e+02
2.500000000000000000e+01 6.109230769230769056e+02 2.594860534667968750e+02 -5.850311279296875000e+00 1.545184105634689331e-01 4.117647111415863037e-01 8.177995300292968750e+01
2.800000000000000000e+01 6.033076923076923777e+02 2.439843597412109375e+02 -5.375946044921875000e+00 1.608943045139312744e-01 6.470588445663452148e-01 9.009360504150390625e+01
5.400000000000000000e+01 6.185153846153848463e+02 2.332689666748046875e+02 -4.938232421875000000e+00 4.578360915184020996e-01 1.764705926179885864e-01 4.778794860839843750e+02
4.800000000000000000e+01 6.351153846153847553e+02 2.308255615234375000e+02 -4.512725830078125000e+00 2.404951751232147217e-01 5.294117927551269531e-01 2.718290710449218750e+02
5.400000000000000000e+01 6.437538461538462116e+02 2.339297637939453125e+02 -4.087219238281250000e+00 2.342860698699951172e-01 4.705882370471954346e-01 1.758980255126953125e+02
5.700000000000000000e+01 6.600384615384616609e+02 2.271114654541015625e+02 -3.661712646484375000e+00 3.070903122425079346e-01 7.058823704719543457e-01 4.093399658203125000e+02
1.300000000000000000e+01 6.523461538461541522e+02 2.223260650634765625e+02 -3.264099121093750000e+00 9.999999776482582092e-03 0.000000000000000000e+00 2.639602088928222656e+01
1.000000000000000000e+01 6.546000000000002501e+02 2.177041473388671875e+02 -2.866485595703125000e+00 9.999999776482582092e-03 1.411764740943908691e+00 6.694229888916015625e+01
5.600000000000000000e+01 6.605692307692307850e+02 2.240552520751953125e+02 -2.468872070312500000e+00 1.186434775590896606e-01 4.117647111415863037e-01 1.811957550048828125e+02
5.700000000000000000e+01 6.718461538461538112e+02 2.339675140380859375e+02 -2.117034912109375000e+00 2.169694751501083374e-01 1.764705926179885864e-01 4.748389587402343750e+02
3.000000000000000000e+01 6.223615384615378616e+02 2.715455322265625000e+02 -1.473388671875000000e+00 9.999999776482582092e-03 0.000000000000000000e+00 1.151207656860351562e+02
1.400000000000000000e+01 6.668153846153848008e+02 2.884808654785156250e+02 -1.342163085937500000e+00 9.999999776482582092e-03 0.000000000000000000e+00 5.489181518554687500e+01
1.500000000000000000e+01 6.971846153846155403e+02 2.996927490234375000e+02 -1.294250488281250000e+00 9.999999776482582092e-03 0.000000000000000000e+00 1.230007839202880859e+01
3.500000000000000000e+01 8.733846153846158131e+02 3.713009948730468750e+02 2.645263671875000000e-01 0.000000000000000000e+00 0.000000000000000000e+00 1.939093017578125000e+02
1.400000000000000000e+01 8.571153846153843006e+02 3.962808532714843750e+02 -3.503723144531250000e-01 0.000000000000000000e+00 0.000000000000000000e+00 2.173713836669921875e+02
2.200000000000000000e+01 8.727230769230766327e+02 4.137616882324218750e+02 -4.279479980468750000e-01 9.999999776482582092e-03 0.000000000000000000e+00 6.409452514648437500e+02
5.000000000000000000e+00 9.359153846153844825e+02 4.197650756835937500e+02 3.186035156250000000e-02 9.999999776482582092e-03 0.000000000000000000e+00 4.521339111328125000e+02
1.000000000000000000e+00 2.543499999999999545e+03 5.146353149414062500e+02 1.898345947265625000e+00 0.000000000000000000e+00 0.000000000000000000e+00 8.456716308593750000e+02
4.000000000000000000e+00 1.577992307692307577e+03 3.382626342773437500e+01 7.959289550781250000e-01 1.079351082444190979e-01 0.000000000000000000e+00 1.141264892578125000e+03
7.200000000000000000e+01 1.165284615384615336e+03 1.147592639923095703e+01 4.501953125000000000e-01 0.000000000000000000e+00 8.823529481887817383e-01 8.452434692382812500e+02
5.600000000000000000e+01 8.792384615384610242e+02 1.587373542785644531e+01 1.044616699218750000e-01 2.639084160327911377e-01 2.941176593303680420e-01 1.823990844726562500e+03
1.300000000000000000e+01 7.041923076923077360e+02 3.449849700927734375e+01 -2.536315917968750000e-01 4.544714689254760742e-01 2.941176593303680420e-01 1.847818115234375000e+03
3.700000000000000000e+01 5.886461538461541068e+02 6.877384948730468750e+01 -6.158447265625000000e-01 9.999999776482582092e-03 4.705882370471954346e-01 1.656206787109375000e+03
5.700000000000000000e+01 4.908769230769230489e+02 1.042135620117187500e+02 -9.780883789062500000e-01 9.999999776482582092e-03 0.000000000000000000e+00 1.469044433593750000e+03
4.800000000000000000e+01 4.454538461538463139e+02 1.464366302490234375e+02 -1.340301513671875000e+00 9.999999776482582092e-03 2.941176593303680420e-01 1.314285156250000000e+03
3.000000000000000000e+01 4.590615384615385324e+02 1.797801055908203125e+02 -1.561523437500000000e+00 0.000000000000000000e+00 2.941176593303680420e-01 1.315183227539062500e+03
6.500000000000000000e+01 5.060769230769229239e+02 1.851214599609375000e+02 -1.782745361328125000e+00 0.000000000000000000e+00 0.000000000000000000e+00 1.206238769531250000e+03
1.700000000000000000e+01 5.809461538461536065e+02 1.857228393554687500e+02 -2.003997802734375000e+00 0.000000000000000000e+00 2.352941185235977173e-01 1.000040405273437500e+03
4.400000000000000000e+01 7.829384615384616382e+02 2.083555755615234375e+02 -2.260192871093750000e+00 0.000000000000000000e+00 0.000000000000000000e+00 1.178834106445312500e+03
6.200000000000000000e+01 9.139307692307691013e+02 2.217628936767578125e+02 -2.621246337890625000e+00 0.000000000000000000e+00 2.941176593303680420e-01 1.707042846679687500e+03
5.300000000000000000e+01 9.231384615384613426e+02 2.456275177001953125e+02 -2.982330322265625000e+00 9.999999776482582092e-03 0.000000000000000000e+00 1.368506469726562500e+03
6.000000000000000000e+00 9.869538461538460297e+02 2.692958679199218750e+02 -3.343383789062500000e+00 4.325776398181915283e-01 5.882353186607360840e-01 1.966505126953125000e+03
5.400000000000000000e+01 9.267230769230765191e+02 2.461831207275390625e+02 -3.539367675781250000e+00 0.000000000000000000e+00 0.000000000000000000e+00 8.721864013671875000e+02
4.400000000000000000e+01 7.018538461538462343e+02 2.364345703125000000e+02 -2.548217773437500000e+00 9.999999776482582092e-03 0.000000000000000000e+00 1.680677368164062500e+03
5.900000000000000000e+01 5.884076923076924004e+02 2.438762664794921875e+02 -2.179382324218750000e+00 0.000000000000000000e+00 2.941176593303680420e-01 1.292322387695312500e+03
4.400000000000000000e+01 5.609384615384614108e+02 2.387239837646484375e+02 -1.851135253906250000e+00 0.000000000000000000e+00 0.000000000000000000e+00 1.089926147460937500e+03
4.700000000000000000e+01 5.578461538461538112e+02 2.256594238281250000e+02 -1.522888183593750000e+00 0.000000000000000000e+00 0.000000000000000000e+00 1.007056457519531250e+03
4.700000000000000000e+01 5.777076923076922412e+02 2.191622772216796875e+02 -1.194641113281250000e+00 0.000000000000000000e+00 0.000000000000000000e+00 9.987631835937500000e+02
3.000000000000000000e+00 4.679615384615383959e+02 1.591800231933593750e+02 -9.927368164062500000e-02 0.000000000000000000e+00 8.823529481887817383e-01 7.743010864257812500e+02
3.000000000000000000e+00 4.835384615384614904e+02 1.654828796386718750e+02 -1.256561279296875000e+00 0.000000000000000000e+00 8.235294222831726074e-01 4.560611267089843750e+02
4.900000000000000000e+01 4.816615384615383277e+02 1.583266296386718750e+02 -1.175292968750000000e+00 0.000000000000000000e+00 1.117647051811218262e+00 4.214620361328125000e+02
4.900000000000000000e+01 5.077461538461538453e+02 1.733544769287109375e+02 -9.576416015625000000e-01 0.000000000000000000e+00 5.882352963089942932e-02 4.008840332031250000e+02
5.400000000000000000e+01 5.243461538461535838e+02 1.501102447509765625e+02 -8.488159179687500000e-01 9.999999776482582092e-03 5.882353186607360840e-01 5.085118713378906250e+02
3.600000000000000000e+01 5.024461538461538339e+02 9.947731781005859375e+01 -7.103271484375000000e-01 0.000000000000000000e+00 0.000000000000000000e+00 2.605032653808593750e+02
5.300000000000000000e+01 5.894461538461539476e+02 4.636997222900390625e+01 -1.150695800781250000e+00 0.000000000000000000e+00 0.000000000000000000e+00 2.263439636230468750e+02
6.200000000000000000e+01 6.298230769230769965e+02 5.062171936035156250e+01 -1.649658203125000000e+00 0.000000000000000000e+00 5.882353186607360840e-01 2.684009094238281250e+02
6.800000000000000000e+01 6.358230769230769965e+02 8.118761444091796875e+01 -1.899169921875000000e+00 9.999999776482582092e-03 8.823529481887817383e-01 2.983446960449218750e+02
3.500000000000000000e+01 6.674153846153848235e+02 2.208945007324218750e+02 -2.381195068359375000e+00 9.999999776482582092e-03 7.647058963775634766e-01 3.272039184570312500e+02
5.600000000000000000e+01 7.119846153846153811e+02 2.325517120361328125e+02 -2.626342773437500000e+00 9.999999776482582092e-03 3.529411852359771729e-01 3.143724365234375000e+02
6.700000000000000000e+01 7.149615384615384528e+02 2.292821960449218750e+02 -2.718872070312500000e+00 9.999999776482582092e-03 5.882353186607360840e-01 3.087387084960937500e+02
2.000000000000000000e+01 7.309846153846153811e+02 2.228005981445312500e+02 -2.811401367187500000e+00 9.999999776482582092e-03 0.000000000000000000e+00 3.155201416015625000e+02
6.500000000000000000e+01 7.452076923076917865e+02 2.262731933593750000e+02 -2.904876708984375000e+00 1.195028722286224365e-01 0.000000000000000000e+00 3.172637023925781250e+02
5.300000000000000000e+01 7.573538461538458932e+02 2.310859069824218750e+02 -3.001190185546875000e+00 1.373559385538101196e-01 4.117647111415863037e-01 3.313486938476562500e+02
2.900000000000000000e+01 7.513923076923074404e+02 2.362040710449218750e+02 -3.193847656250000000e+00 1.362945884466171265e-01 0.000000000000000000e+00 3.020862731933593750e+02
3.900000000000000000e+01 7.460461538461538566e+02 2.088045959472656250e+02 -3.304443359375000000e+00 1.437240839004516602e-01 2.352941185235977173e-01 2.833059082031250000e+02
6.500000000000000000e+01 7.372538461538462116e+02 1.522530670166015625e+02 -3.429290771484375000e+00 1.475285291671752930e-01 5.882352963089942932e-02 2.723562316894531250e+02
5.300000000000000000e+01 7.107923076923078725e+02 5.266731262207031250e+01 -3.679016113281250000e+00 1.732140183448791504e-01 1.176470592617988586e-01 2.437927093505859375e+02
3.100000000000000000e+01 6.900692307692310123e+02 3.867179870605468750e+01 -3.826354980468750000e+00 1.890784502029418945e-01 0.000000000000000000e+00 2.004393463134765625e+02
4.000000000000000000e+01 6.649000000000000909e+02 3.772053909301757812e+01 -3.892700195312500000e+00 1.576946079730987549e-01 0.000000000000000000e+00 1.848229827880859375e+02
6.000000000000000000e+01 6.536769230769225487e+02 3.923657989501953125e+01 -3.959075927734375000e+00 1.661595106124877930e-01 0.000000000000000000e+00 1.685070953369140625e+02
2.800000000000000000e+01 6.450846153846152902e+02 4.317166900634765625e+01 -3.885375976562500000e+00 1.711216270923614502e-01 0.000000000000000000e+00 1.574799804687500000e+02
3.100000000000000000e+01 6.332692307692306031e+02 4.765050125122070312e+01 -3.811676025390625000e+00 1.738470494747161865e-01 2.352941185235977173e-01 1.412233734130859375e+02
4.000000000000000000e+01 6.230538461538460524e+02 5.766984939575195312e+01 -3.737976074218750000e+00 1.877507418394088745e-01 0.000000000000000000e+00 1.446756896972656250e+02
3.000000000000000000e+01 6.053461538461538112e+02 8.962621307373046875e+01 -3.632995605468750000e+00 1.601949185132980347e-01 5.882353186607360840e-01 9.759201049804687500e+01
3.200000000000000000e+01 5.986923076923076223e+02 1.622621154785156250e+02 -3.434051513671875000e+00 1.628028005361557007e-01 0.000000000000000000e+00 7.985486602783203125e+01
1.200000000000000000e+01 5.899307692307691013e+02 2.319721679687500000e+02 -3.235107421875000000e+00 1.553585827350616455e-01 3.529411852359771729e-01 4.284396362304687500e+01
5.500000000000000000e+01 5.779461538461537202e+02 2.604896545410156250e+02 -3.036193847656250000e+00 1.503096073865890503e-01 0.000000000000000000e+00 2.268241500854492188e+01
1.600000000000000000e+01 5.607384615384615927e+02 2.695683593750000000e+02 -3.140045166015625000e+00 1.427797079086303711e-01 2.352941185235977173e-01 8.161457061767578125e+00
1.100000000000000000e+01 6.781000000000002501e+02 3.037192382812500000e+02 -2.935882568359375000e+00 1.489255726337432861e-01 0.000000000000000000e+00 6.026620483398437500e+01
1.700000000000000000e+01 7.046846153846153129e+02 3.081062622070312500e+02 -3.202636718750000000e+00 1.888113319873809814e-01 0.000000000000000000e+00 1.279920120239257812e+02
3.900000000000000000e+01 7.264153846153844825e+02 3.121344604492187500e+02 -3.469360351562500000e+00 2.114136964082717896e-01 0.000000000000000000e+00 1.912310638427734375e+02
2.500000000000000000e+01 7.725846153846152902e+02 3.162907714843750000e+02 -3.992401123046875000e+00 2.342623770236968994e-01 0.000000000000000000e+00 2.399043426513671875e+02
2.900000000000000000e+01 7.795923076923075996e+02 3.174573364257812500e+02 -4.250793457031250000e+00 2.527895867824554443e-01 5.882353186607360840e-01 2.599295959472656250e+02
2.000000000000000000e+01 7.870230769230770420e+02 3.115095520019531250e+02 -4.509155273437500000e+00 2.714009582996368408e-01 5.882353186607360840e-01 2.890841674804687500e+02
4.100000000000000000e+01 8.292923076923077588e+02 2.614866027832031250e+02 -4.689697265625000000e+00 3.361473381519317627e-01 3.529411852359771729e-01 3.693159484863281250e+02
5.100000000000000000e+01 8.382769230769222304e+02 2.256744689941406250e+02 -4.792388916015625000e+00 3.721698522567749023e-01 8.823529481887817383e-01 3.722649841308593750e+02
5.400000000000000000e+01 8.487769230769233673e+02 2.137890319824218750e+02 -4.895080566406250000e+00 3.320329487323760986e-01 0.000000000000000000e+00 3.901697082519531250e+02
1.700000000000000000e+01 8.575923076923079407e+02 2.268743438720703125e+02 -4.997772216796875000e+00 4.324283003807067871e-01 2.941176593303680420e-01 4.755109558105468750e+02
1.600000000000000000e+01 8.710615384615377934e+02 2.563784484863281250e+02 -4.988983154296875000e+00 3.816587626934051514e-01 8.823529481887817383e-01 4.891681213378906250e+02
2.400000000000000000e+01 8.935846153846157449e+02 2.974145507812500000e+02 -4.943054199218750000e+00 3.741276860237121582e-01 2.941176593303680420e-01 4.714584045410156250e+02
4.000000000000000000e+01 9.501076923076926732e+02 2.927846679687500000e+02 -4.897094726562500000e+00 4.496317803859710693e-01 7.647058963775634766e-01 5.595378417968750000e+02
2.500000000000000000e+01 9.308615384615384301e+02 2.647397460937500000e+02 -4.851165771484375000e+00 4.405549168586730957e-01 3.529411852359771729e-01 5.636305541992187500e+02
7.000000000000000000e+00 9.495846153846155175e+02 2.942536926269531250e+02 -4.781890869140625000e+00 3.900029957294464111e-01 2.941176593303680420e-01 6.316572875976562500e+02
3.100000000000000000e+01 9.548923076923078952e+02 3.682080383300781250e+02 -4.783691406250000000e+00 4.037780463695526123e-01 0.000000000000000000e+00 6.483457641601562500e+02
1.600000000000000000e+01 9.683615384615385437e+02 4.031916503906250000e+02 -4.860168457031250000e+00 3.764705061912536621e-01 0.000000000000000000e+00 6.706712036132812500e+02
1.600000000000000000e+01 9.649076923076922867e+02 4.140112609863281250e+02 -4.936614990234375000e+00 3.820409178733825684e-01 2.941176593303680420e-01 6.478508300781250000e+02
3.800000000000000000e+01 9.553384615384610470e+02 4.175929870605468750e+02 -5.013061523437500000e+00 3.748289048671722412e-01 0.000000000000000000e+00 6.437436523437500000e+02
2.600000000000000000e+01 9.176615384615381572e+02 4.181785888671875000e+02 -5.088928222656250000e+00 5.171590447425842285e-01 5.882352963089942932e-02 6.918314819335937500e+02
1.200000000000000000e+01 8.828846153846159268e+02 4.175567932128906250e+02 -5.164154052734375000e+00 3.504050374031066895e-01 2.941176593303680420e-01 6.053684082031250000e+02
3.500000000000000000e+01 8.985076923076924231e+02 2.923660583496093750e+02 -5.176940917968750000e+00 3.638373315334320068e-01 5.882353186607360840e-01 5.752520141601562500e+02
3.900000000000000000e+01 9.557076923076923549e+02 2.419220886230468750e+02 -4.872497558593750000e+00 3.264421820640563965e-01 0.000000000000000000e+00 5.570805664062500000e+02
6.300000000000000000e+01 9.801461538461541068e+02 3.204218139648437500e+02 -4.092376708984375000e+00 1.841091364622116089e-01 0.000000000000000000e+00 4.176113586425781250e+02
5.300000000000000000e+01 1.051730769230769738e+03 4.279986572265625000e+02 -3.296936035156250000e+00 2.150969952344894409e-01 0.000000000000000000e+00 4.427646179199218750e+02
7.200000000000000000e+01 1.055961538461538566e+03 4.482067871093750000e+02 -2.899200439453125000e+00 1.050765588879585266e-01 0.000000000000000000e+00 2.888370971679687500e+02
6.000000000000000000e+01 1.104523076923076815e+03 4.537699890136718750e+02 -2.514648437500000000e+00 1.561134904623031616e-01 0.000000000000000000e+00 4.204334716796875000e+02
5.100000000000000000e+01 1.130184615384615199e+03 4.627465209960937500e+02 -2.143249511718750000e+00 1.311841905117034912e-01 0.000000000000000000e+00 3.681112365722656250e+02
4.300000000000000000e+01 1.144161538461538385e+03 4.591988830566406250e+02 -1.771850585937500000e+00 1.172099336981773376e-01 0.000000000000000000e+00 3.700299377441406250e+02
6.300000000000000000e+01 1.173169230769230353e+03 4.038977966308593750e+02 -1.078857421875000000e+00 1.093920990824699402e-01 0.000000000000000000e+00 3.679127197265625000e+02
5.900000000000000000e+01 1.175369230769231308e+03 3.770857238769531250e+02 -7.738342285156250000e-01 9.999999776482582092e-03 0.000000000000000000e+00 3.426024475097656250e+02
5.600000000000000000e+01 1.158899999999999864e+03 3.438436889648437500e+02 -4.688415527343750000e-01 9.999999776482582092e-03 0.000000000000000000e+00 1.988577880859375000e+02
6.400000000000000000e+01 1.128207692307692469e+03 3.224177551269531250e+02 -1.638488769531250000e-01 9.999999776482582092e-03 1.176470592617988586e-01 1.340487670898437500e+02
2.000000000000000000e+01 1.240484615384615381e+03 4.439794921875000000e+02 1.016003417968750000e+01 0.000000000000000000e+00 0.000000000000000000e+00 1.134827117919921875e+02
1.700000000000000000e+01 1.119346153846154039e+03 4.091892395019531250e+02 9.995178222656250000e+00 0.000000000000000000e+00 0.000000000000000000e+00 5.782912063598632812e+01
1.500000000000000000e+01 1.181253846153847007e+03 3.902763671875000000e+02 9.830291748046875000e+00 0.000000000000000000e+00 0.000000000000000000e+00 2.852669982910156250e+02
2.700000000000000000e+01 9.801538461538459615e+02 3.627443847656250000e+02 9.665405273437500000e+00 0.000000000000000000e+00 0.000000000000000000e+00 1.198748168945312500e+02
1.900000000000000000e+01 9.863923076923076678e+02 3.260830078125000000e+02 9.635986328125000000e+00 0.000000000000000000e+00 0.000000000000000000e+00 1.446565704345703125e+02
3.600000000000000000e+01 1.116092307692307941e+03 3.658783874511718750e+02 9.742034912109375000e+00 0.000000000000000000e+00 0.000000000000000000e+00 7.976573944091796875e+01
1.500000000000000000e+01 1.056600000000000136e+03 3.715325927734375000e+02 9.848052978515625000e+00 0.000000000000000000e+00 0.000000000000000000e+00 7.204344177246093750e+01
2.800000000000000000e+01 1.211838461538461615e+03 4.726297607421875000e+02 9.160827636718750000e+00 0.000000000000000000e+00 2.352941185235977173e-01 2.122481689453125000e+02
1.700000000000000000e+01 7.433692307692309669e+02 2.754530944824218750e+02 9.105712890625000000e+00 0.000000000000000000e+00 0.000000000000000000e+00 1.062865600585937500e+02
1.500000000000000000e+01 7.936076923076925596e+02 3.446660156250000000e+02 8.455200195312500000e+00 0.000000000000000000e+00 0.000000000000000000e+00 2.032770633697509766e+00
1.300000000000000000e+01 7.861769230769230035e+02 3.417680969238281250e+02 8.214721679687500000e+00 0.000000000000000000e+00 0.000000000000000000e+00 6.108917713165283203e+00
2.200000000000000000e+01 7.748384615384612744e+02 3.286351013183593750e+02 7.974243164062500000e+00 0.000000000000000000e+00 0.000000000000000000e+00 3.214426040649414062e+01
6.000000000000000000e+00 7.683384615384616154e+02 3.269775085449218750e+02 7.733764648437500000e+00 0.000000000000000000e+00 0.000000000000000000e+00 3.198430252075195312e+01
4.500000000000000000e+01 7.494384615384611834e+02 3.238301086425781250e+02 7.535217285156250000e+00 0.000000000000000000e+00 0.000000000000000000e+00 3.415734481811523438e+01
6.700000000000000000e+01 6.326307692307691468e+02 2.315690307617187500e+02 7.144744873046875000e+00 0.000000000000000000e+00 0.000000000000000000e+00 8.588518524169921875e+01
1.200000000000000000e+01 6.133076923076926050e+02 2.206030731201171875e+02 7.247985839843750000e+00 0.000000000000000000e+00 2.941176593303680420e-01 3.468247985839843750e+01
6.100000000000000000e+01 6.441000000000001364e+02 2.594219360351562500e+02 7.218139648437500000e+00 0.000000000000000000e+00 0.000000000000000000e+00 9.375706481933593750e+01
1.300000000000000000e+01 6.455692307692305576e+02 2.378844451904296875e+02 7.146606445312500000e+00 0.000000000000000000e+00 0.000000000000000000e+00 1.419586029052734375e+02
5.000000000000000000e+01 6.218538461538461206e+02 2.291262817382812500e+02 7.075103759765625000e+00 0.000000000000000000e+00 0.000000000000000000e+00 8.940802001953125000e+01
4.700000000000000000e+01 5.888769230769229353e+02 2.581723937988281250e+02 6.580505371093750000e+00 0.000000000000000000e+00 2.941176593303680420e-01 1.498281555175781250e+02
7.000000000000000000e+01 6.119846153846156085e+02 2.567159118652343750e+02 6.270233154296875000e+00 0.000000000000000000e+00 0.000000000000000000e+00 1.529029388427734375e+02
1.000000000000000000e+01 6.037692307692309441e+02 2.034863586425781250e+02 6.082702636718750000e+00 0.000000000000000000e+00 0.000000000000000000e+00 1.128262786865234375e+02
5.400000000000000000e+01 5.929461538461537202e+02 1.638233642578125000e+02 5.895202636718750000e+00 0.000000000000000000e+00 0.000000000000000000e+00 1.064559097290039062e+02
6.600000000000000000e+01 5.833230769230772239e+02 2.523695526123046875e+02 5.384063720703125000e+00 0.000000000000000000e+00 0.000000000000000000e+00 1.549164886474609375e+02
6.000000000000000000e+01 6.231923076923072813e+02 2.905683898925781250e+02 4.911346435546875000e+00 0.000000000000000000e+00 0.000000000000000000e+00 1.392625122070312500e+02
1.000000000000000000e+01 6.609692307692311033e+02 2.825024719238281250e+02 4.672210693359375000e+00 0.000000000000000000e+00 6.470588445663452148e-01 1.590470275878906250e+02
5.100000000000000000e+01 6.640230769230771557e+02 2.844903869628906250e+02 4.617004394531250000e+00 0.000000000000000000e+00 5.294117927551269531e-01 1.609231262207031250e+02
3.800000000000000000e+01 6.338692307692302847e+02 2.907588806152343750e+02 3.767333984375000000e+00 0.000000000000000000e+00 1.058823585510253906e+00 1.630017395019531250e+02
5.600000000000000000e+01 6.125692307692308987e+02 3.063856811523437500e+02 3.649810791015625000e+00 0.000000000000000000e+00 5.294117927551269531e-01 1.877492675781250000e+02
6.600000000000000000e+01 6.370692307692307850e+02 2.715692138671875000e+02 3.535003662109375000e+00 0.000000000000000000e+00 0.000000000000000000e+00 1.859166107177734375e+02
3.100000000000000000e+01 6.627307692307695106e+02 2.671552124023437500e+02 3.536346435546875000e+00 0.000000000000000000e+00 1.117647051811218262e+00 2.160863952636718750e+02
1.000000000000000000e+01 6.569076923076925141e+02 2.476790771484375000e+02 3.597473144531250000e+00 0.000000000000000000e+00 1.823529362678527832e+00 2.467086181640625000e+02
5.000000000000000000e+00 6.009999999999998863e+02 1.888386840820312500e+02 3.113372802734375000e+00 0.000000000000000000e+00 2.176470518112182617e+00 1.065011291503906250e+02
1.100000000000000000e+01 5.533769230769231626e+02 1.772091369628906250e+02 2.727874755859375000e+00 0.000000000000000000e+00 2.176470518112182617e+00 2.341117248535156250e+02
4.100000000000000000e+01 5.463076923076921503e+02 1.767722625732421875e+02 2.861480712890625000e+00 0.000000000000000000e+00 8.235294222831726074e-01 2.465385131835937500e+02
8.000000000000000000e+00 5.470000000000000000e+02 1.740560150146484375e+02 3.044219970703125000e+00 0.000000000000000000e+00 2.352941185235977173e-01 2.658196105957031250e+02
1.700000000000000000e+01 5.046076923076922185e+02 1.711183624267578125e+02 3.189910888671875000e+00 0.000000000000000000e+00 5.882353186607360840e-01 2.432266235351562500e+02
1.000000000000000000e+01 4.721538461538460751e+02 1.697583465576171875e+02 3.260101318359375000e+00 0.000000000000000000e+00 1.411764740943908691e+00 1.636934204101562500e+02
4.100000000000000000e+01 4.503923076923073836e+02 1.660951995849609375e+02 3.339782714843750000e+00 0.000000000000000000e+00 1.588235259056091309e+00 9.628340911865234375e+01
6.000000000000000000e+01 4.743307692307692491e+02 1.647946014404296875e+02 3.349273681640625000e+00 0.000000000000000000e+00 5.294117927551269531e-01 1.837728576660156250e+02
8.000000000000000000e+00 4.959000000000000341e+02 1.995782470703125000e+02 1.459747314453125000e+00 0.000000000000000000e+00 1.176470592617988586e-01 3.079637756347656250e+02
4.100000000000000000e+01 4.885615384615384187e+02 2.093977661132812500e+02 9.343261718750000000e-01 0.000000000000000000e+00 4.705882370471954346e-01 2.837250976562500000e+02
5.000000000000000000e+01 4.646538461538459615e+02 2.064191284179687500e+02 8.437194824218750000e-01 0.000000000000000000e+00 0.000000000000000000e+00 5.470896606445312500e+02
6.000000000000000000e+01 4.411769230769231172e+02 1.987766418457031250e+02 7.531433105468750000e-01 0.000000000000000000e+00 0.000000000000000000e+00 6.980343627929687500e+02
1.800000000000000000e+01 4.258769230769233332e+02 1.851363067626953125e+02 6.625671386718750000e-01 0.000000000000000000e+00 0.000000000000000000e+00 4.676397094726562500e+02
2.600000000000000000e+01 4.184769230769231285e+02 1.572857360839843750e+02 6.022033691406250000e-01 0.000000000000000000e+00 0.000000000000000000e+00 6.478937988281250000e+02
2.000000000000000000e+00 4.011384615384617405e+02 1.353697204589843750e+02 6.325378417968750000e-01 0.000000000000000000e+00 5.294117927551269531e-01 3.832819213867187500e+02
3.000000000000000000e+00 3.538615384615384301e+02 1.349659118652343750e+02 1.242828369140625000e+00 0.000000000000000000e+00 8.823529481887817383e-01 2.273863983154296875e+02
1.100000000000000000e+01 3.391307692307692605e+02 1.221484832763671875e+02 1.738922119140625000e+00 0.000000000000000000e+00 1.823529362678527832e+00 1.473574676513671875e+02
2.600000000000000000e+01 3.363923076923075541e+02 1.223181991577148438e+02 1.718444824218750000e+00 0.000000000000000000e+00 1.882352948188781738e+00 1.932831420898437500e+02
1.000000000000000000e+00 3.254923076923078042e+02 1.096774063110351562e+02 8.606567382812500000e-01 0.000000000000000000e+00 2.647058725357055664e+00 2.513612976074218750e+02
1.000000000000000000e+00 3.334461538461539476e+02 1.166775131225585938e+02 9.065551757812500000e-01 0.000000000000000000e+00 2.823529481887817383e+00 2.253272094726562500e+02
1.000000000000000000e+00 3.424846153846153811e+02 1.163139038085937500e+02 1.124389648437500000e+00 0.000000000000000000e+00 2.941176414489746094e+00 7.321512603759765625e+01
1.000000000000000000e+00 3.402923076923077019e+02 1.206789321899414062e+02 1.245544433593750000e+00 0.000000000000000000e+00 3.117647171020507812e+00 9.789241790771484375e+01
3.000000000000000000e+00 3.179538461538460297e+02 1.100366210937500000e+02 1.352203369140625000e+00 0.000000000000000000e+00 2.882352828979492188e+00 1.178117980957031250e+02
1.000000000000000000e+00 3.024153846153845961e+02 1.022971496582031250e+02 1.361785888671875000e+00 0.000000000000000000e+00 2.352941274642944336e+00 1.031621322631835938e+02
1.000000000000000000e+00 2.851538461538461320e+02 1.245671386718750000e+02 9.901428222656250000e-01 0.000000000000000000e+00 1.235294103622436523e+00 1.260058364868164062e+02
1.100000000000000000e+01 3.973461538461536406e+02 1.421630859375000000e+02 8.684692382812500000e-01 0.000000000000000000e+00 1.411764740943908691e+00 1.173812026977539062e+02
5.800000000000000000e+01 4.868307692307689649e+02 1.985493316650390625e+02 4.282226562500000000e-01 0.000000000000000000e+00 1.058823585510253906e+00 1.635261535644531250e+02
4.000000000000000000e+00 5.402461538461537884e+02 2.071650543212890625e+02 -2.593078613281250000e-01 0.000000000000000000e+00 1.823529362678527832e+00 2.579425964355468750e+02
6.200000000000000000e+01 5.484769230769230717e+02 2.604331665039062500e+02 -1.213104248046875000e+00 0.000000000000000000e+00 0.000000000000000000e+00 2.451495513916015625e+02
5.700000000000000000e+01 5.515692307692308987e+02 2.737751770019531250e+02 -1.555999755859375000e+00 0.000000000000000000e+00 0.000000000000000000e+00 3.506915893554687500e+02
5.800000000000000000e+01 5.509000000000003183e+02 2.834767456054687500e+02 -1.898864746093750000e+00 0.000000000000000000e+00 0.000000000000000000e+00 4.461045227050781250e+02
6.400000000000000000e+01 5.698153846153846871e+02 2.821148071289062500e+02 -2.199249267578125000e+00 1.363471895456314087e-01 0.000000000000000000e+00 6.862550048828125000e+02
5.800000000000000000e+01 5.481999999999999318e+02 2.731140441894531250e+02 -2.372100830078125000e+00 9.999999776482582092e-03 2.941176593303680420e-01 6.323842163085937500e+02
6.600000000000000000e+01 5.296615384615386120e+02 2.488095703125000000e+02 -2.544921875000000000e+00 1.203096359968185425e-01 0.000000000000000000e+00 8.148885498046875000e+02
5.000000000000000000e+01 5.343153846153844597e+02 2.181209716796875000e+02 -2.717773437500000000e+00 1.378663033246994019e-01 5.882352963089942932e-02 9.667906494140625000e+02
2.000000000000000000e+00 4.851769230769230035e+02 1.898713073730468750e+02 -2.810668945312500000e+00 0.000000000000000000e+00 1.411764740943908691e+00 3.180578002929687500e+02
1.300000000000000000e+01 4.914076923076926278e+02 1.923443603515625000e+02 -2.815002441406250000e+00 0.000000000000000000e+00 1.705882310867309570e+00 2.982615966796875000e+02
6.100000000000000000e+01 5.944076923076920593e+02 2.492806701660156250e+02 -2.935211181640625000e+00 0.000000000000000000e+00 1.294117689132690430e+00 3.303323974609375000e+02
3.400000000000000000e+01 6.412846153846149946e+02 2.988148193359375000e+02 -3.088226318359375000e+00 0.000000000000000000e+00 1.000000000000000000e+00 3.256233215332031250e+02
5.700000000000000000e+01 6.998076923076921503e+02 3.617222900390625000e+02 -3.241271972656250000e+00 0.000000000000000000e+00 1.705882310867309570e+00 3.615903930664062500e+02
6.200000000000000000e+01 7.689538461538462570e+02 3.483464660644531250e+02 -3.394317626953125000e+00 9.999999776482582092e-03 0.000000000000000000e+00 6.176619262695312500e+02
5.500000000000000000e+01 7.151307692307690331e+02 3.416786499023437500e+02 -3.721252441406250000e+00 2.651187181472778320e-01 0.000000000000000000e+00 9.385341796875000000e+02
3.300000000000000000e+01 6.943692307692309669e+02 3.083263854980468750e+02 -4.048187255859375000e+00 2.582449913024902344e-01 2.941176593303680420e-01 1.093514526367187500e+03
4.000000000000000000e+01 6.567307692307693969e+02 2.541376190185546875e+02 -4.375091552734375000e+00 4.146382212638854980e-01 0.000000000000000000e+00 1.269030395507812500e+03
3.700000000000000000e+01 6.165692307692310123e+02 2.065479125976562500e+02 -4.758728027343750000e+00 4.274859726428985596e-01 0.000000000000000000e+00 1.164848510742187500e+03
3.800000000000000000e+01 5.787846153846155630e+02 1.833253784179687500e+02 -5.312438964843750000e+00 5.618312358856201172e-01 0.000000000000000000e+00 1.362099609375000000e+03
2.500000000000000000e+01 5.683692307692306258e+02 1.806278686523437500e+02 -5.866180419921875000e+00 6.545869112014770508e-01 0.000000000000000000e+00 1.598584106445312500e+03
4.900000000000000000e+01 5.412000000000001592e+02 1.902428588867187500e+02 -6.419891357421875000e+00 5.769220590591430664e-01 2.941176593303680420e-01 1.511003540039062500e+03
6.000000000000000000e+00 5.355307692307695788e+02 2.059590454101562500e+02 -6.840698242187500000e+00 9.515556097030639648e-01 0.000000000000000000e+00 1.889929199218750000e+03
3.700000000000000000e+01 5.161923076923077360e+02 2.105127258300781250e+02 -7.128631591796875000e+00 9.949734807014465332e-01 5.882352963089942932e-02 1.879663208007812500e+03
1.600000000000000000e+01 5.091384615384613426e+02 2.070089721679687500e+02 -7.416564941406250000e+00 8.280733227729797363e-01 0.000000000000000000e+00 1.768910888671875000e+03
4.000000000000000000e+01 5.014769230769228443e+02 1.973002929687500000e+02 -7.704498291015625000e+00 6.494227051734924316e-01 0.000000000000000000e+00 1.540471679687500000e+03
4.700000000000000000e+01 4.810538461538459956e+02 1.900573577880859375e+02 -7.498107910156250000e+00 5.920737981796264648e-01 5.294117927551269531e-01 1.683631591796875000e+03
1.400000000000000000e+01 4.634000000000000341e+02 1.928956756591796875e+02 -7.126953125000000000e+00 8.732070922851562500e-01 0.000000000000000000e+00 1.713490356445312500e+03
5.400000000000000000e+01 4.437846153846154493e+02 1.914308929443359375e+02 -6.755798339843750000e+00 4.455328285694122314e-01 0.000000000000000000e+00 1.065027587890625000e+03
6.800000000000000000e+01 4.326538461538460751e+02 1.872776947021484375e+02 -6.384643554687500000e+00 1.959970593452453613e-01 8.823529481887817383e-01 8.897929077148437500e+02
6.100000000000000000e+01 4.390461538461537430e+02 1.812189636230468750e+02 -5.680297851562500000e+00 9.999999776482582092e-03 7.058823704719543457e-01 5.749574584960937500e+02
4.600000000000000000e+01 5.526538461538463025e+02 1.541841278076171875e+02 -3.264282226562500000e+00 9.999999776482582092e-03 1.588235259056091309e+00 5.746273803710937500e+02
4.900000000000000000e+01 5.271384615384615699e+02 1.487280883789062500e+02 -2.881042480468750000e+00 1.391475796699523926e-01 1.235294103622436523e+00 6.638843994140625000e+02
4.500000000000000000e+01 4.993307692307691923e+02 1.473512268066406250e+02 -2.497772216796875000e+00 2.045020312070846558e-01 9.411764740943908691e-01 8.837952880859375000e+02
2.600000000000000000e+01 4.602230769230769738e+02 1.474050750732421875e+02 -2.347229003906250000e+00 2.728917002677917480e-01 1.529411792755126953e+00 8.537316894531250000e+02
1.800000000000000000e+01 4.139153846153845393e+02 1.396086120605468750e+02 -2.511474609375000000e+00 2.628399133682250977e-01 1.000000000000000000e+00 9.286670532226562500e+02
4.600000000000000000e+01 4.092153846153844370e+02 1.353370971679687500e+02 -2.593597412109375000e+00 2.876174449920654297e-01 9.411764740943908691e-01 8.923332519531250000e+02
5.500000000000000000e+01 3.816538461538462457e+02 1.571996307373046875e+02 -6.410522460937500000e+00 1.761458367109298706e-01 0.000000000000000000e+00 7.643355712890625000e+02
5.100000000000000000e+01 4.124692307692306485e+02 1.608157196044921875e+02 -7.009979248046875000e+00 6.041075587272644043e-01 5.882353186607360840e-01 1.134911010742187500e+03
4.600000000000000000e+01 4.098307692307690786e+02 1.816684112548828125e+02 -7.609436035156250000e+00 8.592261075973510742e-01 1.294117689132690430e+00 1.423371826171875000e+03
2.100000000000000000e+01 4.259846153846152674e+02 1.848062286376953125e+02 -8.068359375000000000e+00 9.516208767890930176e-01 8.235294222831726074e-01 1.450862548828125000e+03
2.300000000000000000e+01 4.110000000000001137e+02 1.616879730224609375e+02 -8.105804443359375000e+00 6.815817952156066895e-01 1.176470637321472168e+00 1.249802978515625000e+03
3.300000000000000000e+01 4.006769230769231172e+02 1.499017944335937500e+02 -8.143218994140625000e+00 5.764875411987304688e-01 1.294117689132690430e+00 1.113097167968750000e+03
2.800000000000000000e+01 3.652076923076921275e+02 1.500639648437500000e+02 -8.002532958984375000e+00 4.511919021606445312e-01 1.294117689132690430e+00 9.372969970703125000e+02
1.000000000000000000e+01 3.609076923076924004e+02 1.533832244873046875e+02 -7.608917236328125000e+00 5.087857842445373535e-01 1.000000000000000000e+00 1.093984252929687500e+03
1.700000000000000000e+01 3.723076923076922640e+02 1.467667388916015625e+02 -7.215301513671875000e+00 6.007562279701232910e-01 6.470588445663452148e-01 1.074350463867187500e+03
2.000000000000000000e+01 3.977153846153846075e+02 1.562659912109375000e+02 -6.534606933593750000e+00 6.926826834678649902e-01 1.411764740943908691e+00 1.152804565429687500e+03
1.900000000000000000e+01 3.923692307692305121e+02 1.542810363769531250e+02 -6.283020019531250000e+00 7.544004321098327637e-01 9.411764740943908691e-01 1.161520874023437500e+03
3.400000000000000000e+01 3.977923076923077588e+02 1.452792816162109375e+02 -6.031433105468750000e+00 5.358603000640869141e-01 1.588235259056091309e+00 9.306885375976562500e+02
2.900000000000000000e+01 4.045615384615387597e+02 1.454807891845703125e+02 -5.779876708984375000e+00 3.183064460754394531e-01 1.411764740943908691e+00 6.706896972656250000e+02
1.700000000000000000e+01 4.209692307692308759e+02 1.253657150268554688e+02 -5.906372070312500000e+00 6.868917346000671387e-01 5.882353186607360840e-01 1.036635009765625000e+03
3.100000000000000000e+01 4.239076923076924572e+02 1.282955322265625000e+02 -5.969604492187500000e+00 6.496959924697875977e-01 1.000000000000000000e+00 9.565891723632812500e+02
3.300000000000000000e+01 4.057230769230770875e+02 1.464265136718750000e+02 -6.053253173828125000e+00 3.665948808193206787e-01 1.588235259056091309e+00 5.679808349609375000e+02
4.000000000000000000e+01 4.020692307692308987e+02 1.650538940429687500e+02 -6.198089599609375000e+00 3.909506201744079590e-01 1.352941155433654785e+00 7.120477905273437500e+02
5.600000000000000000e+01 4.031000000000000227e+02 1.723749389648437500e+02 -6.342895507812500000e+00 4.796877205371856689e-01 1.058823585510253906e+00 6.594732055664062500e+02
6.000000000000000000e+01 4.217307692307693969e+02 1.822555389404296875e+02 -6.487731933593750000e+00 3.986690044403076172e-01 1.588235259056091309e+00 6.293880615234375000e+02
5.500000000000000000e+01 4.238307692307692491e+02 1.888975219726562500e+02 -6.529327392578125000e+00 4.349466264247894287e-01 1.294117689132690430e+00 8.155257568359375000e+02
6.100000000000000000e+01 4.265461538461537998e+02 1.958479156494140625e+02 -6.467712402343750000e+00 4.149176776409149170e-01 0.000000000000000000e+00 5.037336120605468750e+02
5.700000000000000000e+01 4.244538461538459728e+02 2.017783966064453125e+02 -6.406066894531250000e+00 5.921628475189208984e-01 6.470588445663452148e-01 6.067133178710937500e+02
5.600000000000000000e+01 4.297692307692308304e+02 2.043148498535156250e+02 -6.344451904296875000e+00 3.800265491008758545e-01 5.882353186607360840e-01 6.318224487304687500e+02
2.400000000000000000e+01 4.334769230769229011e+02 2.051886291503906250e+02 -6.150970458984375000e+00 5.635445117950439453e-01 2.941176593303680420e-01 6.556359863281250000e+02
2.600000000000000000e+01 4.460538461538462229e+02 2.081669464111328125e+02 -5.913513183593750000e+00 4.916017949581146240e-01 3.529411852359771729e-01 5.184909667968750000e+02
4.600000000000000000e+01 4.620000000000001137e+02 2.095250244140625000e+02 -5.438598632812500000e+00 3.547745645046234131e-01 5.882352963089942932e-02 3.544285278320312500e+02
4.700000000000000000e+01 4.645384615384615472e+02 2.070074920654296875e+02 -5.196990966796875000e+00 3.635782897472381592e-01 1.529411792755126953e+00 4.251694030761718750e+02
2.400000000000000000e+01 4.601769230769231740e+02 2.080351562500000000e+02 -4.955383300781250000e+00 2.022753357887268066e-01 1.058823585510253906e+00 3.109548339843750000e+02
3.200000000000000000e+01 4.768538461538464617e+02 2.058512573242187500e+02 -4.713775634765625000e+00 2.508135437965393066e-01 1.117647051811218262e+00 2.925576477050781250e+02
3.800000000000000000e+01 4.865692307692310123e+02 2.005541229248046875e+02 -4.526824951171875000e+00 2.708818912506103516e-01 1.294117689132690430e+00 3.358997802734375000e+02
3.800000000000000000e+01 4.825153846153843347e+02 2.019148712158203125e+02 -4.503875732421875000e+00 2.479201853275299072e-01 1.588235259056091309e+00 3.589421386718750000e+02
4.500000000000000000e+01 5.338384615384613880e+02 2.051317138671875000e+02 -4.599182128906250000e+00 2.174134999513626099e-01 8.823529481887817383e-01 2.927465209960937500e+02
2.600000000000000000e+01 5.889153846153847098e+02 2.181811828613281250e+02 -5.209869384765625000e+00 2.976035177707672119e-01 8.235294222831726074e-01 3.490021972656250000e+02
3.700000000000000000e+01 5.813692307692306258e+02 2.228881225585937500e+02 -5.515197753906250000e+00 3.219987452030181885e-01 1.176470637321472168e+00 3.426986083984375000e+02
2.400000000000000000e+01 5.694846153846153811e+02 2.287733917236328125e+02 -5.889739990234375000e+00 3.676334023475646973e-01 1.294117689132690430e+00 3.427897033691406250e+02
2.500000000000000000e+01 5.684461538461539476e+02 2.336820068359375000e+02 -6.287353515625000000e+00 3.127116262912750244e-01 1.588235259056091309e+00 3.169964294433593750e+02
1.600000000000000000e+01 5.876384615384616836e+02 2.405782623291015625e+02 -6.684997558593750000e+00 3.753522932529449463e-01 8.823529481887817383e-01 4.464873962402343750e+02
5.700000000000000000e+01 6.232230769230768601e+02 2.542294006347656250e+02 -7.082611083984375000e+00 5.700666308403015137e-01 4.117647111415863037e-01 6.269946899414062500e+02
7.100000000000000000e+01 6.368153846153848008e+02 2.681278686523437500e+02 -7.252380371093750000e+00 7.396435737609863281e-01 9.411764740943908691e-01 7.579578247070312500e+02
3.500000000000000000e+01 6.456538461538459615e+02 2.771214294433593750e+02 -7.422180175781250000e+00 6.924042105674743652e-01 1.058823585510253906e+00 7.026354370117187500e+02
7.100000000000000000e+01 6.687846153846151083e+02 2.900177307128906250e+02 -7.591979980468750000e+00 7.517179846763610840e-01 6.470588445663452148e-01 8.034996948242187500e+02
6.100000000000000000e+01 6.982461538461536747e+02 2.990104370117187500e+02 -7.682067871093750000e+00 9.069052934646606445e-01 1.000000000000000000e+00 9.000921020507812500e+02
6.000000000000000000e+01 6.986615384615384983e+02 3.097836303710937500e+02 -7.533081054687500000e+00 8.001241683959960938e-01 7.647058963775634766e-01 8.445347290039062500e+02
6.000000000000000000e+01 6.973615384615379753e+02 3.223659667968750000e+02 -7.384094238281250000e+00 7.325225472450256348e-01 4.117647111415863037e-01 8.740788574218750000e+02
3.700000000000000000e+01 7.105461538461536293e+02 3.220811767578125000e+02 -7.235107421875000000e+00 9.771441221237182617e-01 0.000000000000000000e+00 1.413371948242187500e+03
4.700000000000000000e+01 6.741846153846155403e+02 2.877614135742187500e+02 -6.339508056640625000e+00 3.538918197154998779e-01 2.941176593303680420e-01 3.658951721191406250e+02
4.000000000000000000e+01 6.438307692307694197e+02 2.815245056152343750e+02 -5.792083740234375000e+00 2.398127317428588867e-01 1.176470592617988586e-01 1.519012298583984375e+02
4.900000000000000000e+01 6.347461538461541295e+02 2.694748840332031250e+02 -5.244689941406250000e+00 3.067525923252105713e-01 2.941176593303680420e-01 3.528190002441406250e+02
5.800000000000000000e+01 6.277999999999999545e+02 2.620029602050781250e+02 -4.834167480468750000e+00 2.429213076829910278e-01 5.882352963089942932e-02 2.923670349121093750e+02
1.800000000000000000e+01 6.361461538461539931e+02 2.584585876464843750e+02 -4.469329833984375000e+00 1.420351415872573853e-01 0.000000000000000000e+00 9.716471862792968750e+01
1.700000000000000000e+01 6.458307692307687375e+02 2.563016662597656250e+02 -4.104461669921875000e+00 2.396936267614364624e-01 5.882352963089942932e-02 2.509564514160156250e+02
1.200000000000000000e+01 6.716846153846153129e+02 2.320165557861328125e+02 -2.912567138671875000e+00 9.999999776482582092e-03 2.941176593303680420e-01 2.289645433425903320e+00
4.900000000000000000e+01 6.878615384615384301e+02 2.487294769287109375e+02 -2.499053955078125000e+00 9.999999776482582092e-03 7.647058963775634766e-01 1.715960502624511719e+01
5.800000000000000000e+01 6.926153846153846416e+02 2.639338378906250000e+02 -2.136138916015625000e+00 2.765249907970428467e-01 5.882352963089942932e-02 3.256421508789062500e+02
8.000000000000000000e+00 6.305769230769230944e+02 2.786900634765625000e+02 -1.502716064453125000e+00 9.999999776482582092e-03 0.000000000000000000e+00 2.263261985778808594e+01
4.500000000000000000e+01 6.670846153846152902e+02 2.935991821289062500e+02 -1.364135742187500000e+00 9.999999776482582092e-03 2.941176593303680420e-01 4.465808105468750000e+01
1.800000000000000000e+01 8.276692307692308077e+02 3.700513000488281250e+02 3.955688476562500000e-01 0.000000000000000000e+00 0.000000000000000000e+00 4.395967102050781250e+01
3.400000000000000000e+01 8.583384615384616154e+02 3.877648620605468750e+02 -3.099365234375000000e-01 0.000000000000000000e+00 0.000000000000000000e+00 1.800576477050781250e+02
3.900000000000000000e+01 8.484692307692309896e+02 3.974008789062500000e+02 -1.015441894531250000e+00 0.000000000000000000e+00 0.000000000000000000e+00 3.335507507324218750e+02
1.500000000000000000e+01 8.574923076923078042e+02 4.044169311523437500e+02 -1.193634033203125000e+00 9.999999776482582092e-03 0.000000000000000000e+00 5.697014770507812500e+02
2.300000000000000000e+01 9.053076923076920366e+02 4.166018981933593750e+02 -8.445434570312500000e-01 9.999999776482582092e-03 2.941176593303680420e-01 2.070242462158203125e+02
2.900000000000000000e+01 1.006184615384615540e+03 4.204999389648437500e+02 -1.463317871093750000e-01 0.000000000000000000e+00 0.000000000000000000e+00 4.639950942993164062e+01
7.100000000000000000e+01 1.939846153846153356e+03 1.939851837158203125e+02 8.300476074218750000e+00 0.000000000000000000e+00 0.000000000000000000e+00 2.487668457031250000e+02
5.900000000000000000e+01 3.010630769230771421e+03 4.871129455566406250e+02 3.028411865234375000e+00 0.000000000000000000e+00 0.000000000000000000e+00 6.434152221679687500e+02
0.000000000000000000e+00 2.142523076923077042e+03 4.746898498535156250e+02 1.131347656250000000e+00 0.000000000000000000e+00 0.000000000000000000e+00 1.589154907226562500e+03
2.000000000000000000e+00 1.705207692307692923e+03 2.994047241210937500e+02 5.015563964843750000e-01 0.000000000000000000e+00 0.000000000000000000e+00 1.174998046875000000e+03
5.900000000000000000e+01 6.442538461538460979e+02 4.169939422607421875e+01 -4.314575195312500000e-01 0.000000000000000000e+00 5.882353186607360840e-01 1.011596496582031250e+03
2.000000000000000000e+01 5.607538461538459842e+02 5.626541519165039062e+01 -6.957397460937500000e-01 0.000000000000000000e+00 6.470588445663452148e-01 1.223620727539062500e+03
5.300000000000000000e+01 5.165692307692308987e+02 1.071573486328125000e+02 -9.444274902343750000e-01 0.000000000000000000e+00 1.176470592617988586e-01 1.064626464843750000e+03
5.500000000000000000e+01 4.873615384615385437e+02 1.715173797607421875e+02 -1.193115234375000000e+00 0.000000000000000000e+00 3.529411852359771729e-01 1.125214477539062500e+03
4.500000000000000000e+01 4.820461538461540840e+02 2.235975952148437500e+02 -1.441833496093750000e+00 0.000000000000000000e+00 7.647058963775634766e-01 9.190346679687500000e+02
4.500000000000000000e+01 5.171461538461538794e+02 2.178707275390625000e+02 -1.569488525390625000e+00 0.000000000000000000e+00 8.823529481887817383e-01 8.499434814453125000e+02
1.700000000000000000e+01 5.887923076923076451e+02 1.990262298583984375e+02 -1.697174072265625000e+00 0.000000000000000000e+00 1.764705926179885864e-01 7.447448120117187500e+02
6.900000000000000000e+01 7.476846153846151992e+02 1.979376983642578125e+02 -1.824829101562500000e+00 0.000000000000000000e+00 0.000000000000000000e+00 9.447837524414062500e+02
6.600000000000000000e+01 8.997153846153844370e+02 2.234150848388671875e+02 -1.970581054687500000e+00 9.999999776482582092e-03 0.000000000000000000e+00 1.163463012695312500e+03
3.000000000000000000e+00 9.226153846153841869e+02 2.152280731201171875e+02 -2.370635986328125000e+00 4.221104085445404053e-01 0.000000000000000000e+00 1.552817871093750000e+03
6.500000000000000000e+01 8.289384615384611834e+02 2.072600708007812500e+02 -2.570648193359375000e+00 1.546230912208557129e-01 5.882352963089942932e-02 1.397042968750000000e+03
1.000000000000000000e+00 8.825461538461543114e+02 2.015695190429687500e+02 -2.667236328125000000e+00 5.548105239868164062e-01 0.000000000000000000e+00 1.980379150390625000e+03
6.000000000000000000e+00 8.363000000000005230e+02 1.922067565917968750e+02 -2.660400390625000000e+00 3.087928295135498047e-01 0.000000000000000000e+00 1.998291625976562500e+03
7.600000000000000000e+01 7.194846153846150401e+02 1.815907440185546875e+02 -2.646728515625000000e+00 0.000000000000000000e+00 0.000000000000000000e+00 1.599635742187500000e+03
5.200000000000000000e+01 6.138923076923077815e+02 1.853256225585937500e+02 -2.433807373046875000e+00 0.000000000000000000e+00 0.000000000000000000e+00 1.322569580078125000e+03
2.800000000000000000e+01 6.093846153846153584e+02 2.098148803710937500e+02 -2.152221679687500000e+00 0.000000000000000000e+00 0.000000000000000000e+00 1.268942138671875000e+03
4.300000000000000000e+01 5.863230769230772239e+02 2.273820800781250000e+02 -1.870605468750000000e+00 0.000000000000000000e+00 0.000000000000000000e+00 1.138230712890625000e+03
7.000000000000000000e+01 5.710846153846152902e+02 2.407551116943359375e+02 -1.588989257812500000e+00 0.000000000000000000e+00 0.000000000000000000e+00 1.079693481445312500e+03
4.300000000000000000e+01 5.672615384615385210e+02 2.337820281982421875e+02 -1.324645996093750000e+00 0.000000000000000000e+00 0.000000000000000000e+00 9.780343017578125000e+02
3.900000000000000000e+01 5.593230769230766555e+02 2.193363037109375000e+02 -1.060272216796875000e+00 0.000000000000000000e+00 0.000000000000000000e+00 8.862611694335937500e+02
3.800000000000000000e+01 4.108538461538462343e+02 1.352862243652343750e+02 -3.889160156250000000e-01 0.000000000000000000e+00 0.000000000000000000e+00 7.477438964843750000e+02
3.400000000000000000e+01 4.044923076923075200e+02 1.311264648437500000e+02 -6.776123046875000000e-01 0.000000000000000000e+00 8.235294222831726074e-01 6.540908813476562500e+02
1.200000000000000000e+01 4.273538461538458932e+02 1.716817474365234375e+02 -1.316223144531250000e+00 0.000000000000000000e+00 1.470588207244873047e+00 4.555774536132812500e+02
3.100000000000000000e+01 4.550538461538459956e+02 1.469126434326171875e+02 -1.592742919921875000e+00 0.000000000000000000e+00 6.470588445663452148e-01 4.263945617675781250e+02
4.300000000000000000e+01 4.801461538461535952e+02 1.689714965820312500e+02 -1.490631103515625000e+00 9.999999776482582092e-03 0.000000000000000000e+00 5.333898925781250000e+02
6.200000000000000000e+01 4.875153846153849599e+02 1.609588317871093750e+02 -1.397003173828125000e+00 9.999999776482582092e-03 0.000000000000000000e+00 5.803774414062500000e+02
3.000000000000000000e+01 4.782615384615385778e+02 1.634940948486328125e+02 -1.303375244140625000e+00 0.000000000000000000e+00 0.000000000000000000e+00 3.051187744140625000e+02
3.100000000000000000e+01 4.922461538461540158e+02 1.538643341064453125e+02 -1.209747314453125000e+00 0.000000000000000000e+00 0.000000000000000000e+00 2.636670227050781250e+02
2.500000000000000000e+01 4.982923076923074746e+02 1.077379226684570312e+02 -1.195129394531250000e+00 0.000000000000000000e+00 0.000000000000000000e+00 2.912403259277343750e+02
5.400000000000000000e+01 5.004153846153845961e+02 1.110516891479492188e+02 -1.186798095703125000e+00 0.000000000000000000e+00 5.882353186607360840e-01 2.256105957031250000e+02
5.400000000000000000e+01 5.655307692307692378e+02 8.672930908203125000e+01 -1.751434326171875000e+00 9.999999776482582092e-03 0.000000000000000000e+00 2.316342163085937500e+02
3.100000000000000000e+01 5.953230769230769965e+02 8.782164001464843750e+01 -1.989898681640625000e+00 9.999999776482582092e-03 2.352941185235977173e-01 2.564339599609375000e+02
4.600000000000000000e+01 6.057769230769229125e+02 1.062001037597656250e+02 -2.228363037109375000e+00 9.999999776482582092e-03 0.000000000000000000e+00 2.757897644042968750e+02
2.700000000000000000e+01 6.227461538461539021e+02 1.602133331298828125e+02 -2.466827392578125000e+00 9.999999776482582092e-03 2.941176593303680420e-01 3.003039245605468750e+02
4.200000000000000000e+01 6.332076923076923549e+02 2.242165679931640625e+02 -2.627441406250000000e+00 9.999999776482582092e-03 6.470588445663452148e-01 2.995675964355468750e+02
6.500000000000000000e+01 6.458615384615382027e+02 2.637062683105468750e+02 -2.762145996093750000e+00 9.999999776482582092e-03 2.352941185235977173e-01 3.031457824707031250e+02
5.300000000000000000e+01 6.555769230769230944e+02 2.808716430664062500e+02 -2.896820068359375000e+00 9.999999776482582092e-03 5.294117927551269531e-01 3.032281799316406250e+02
6.600000000000000000e+01 6.665538461538458250e+02 2.906920776367187500e+02 -3.031494140625000000e+00 9.999999776482582092e-03 8.235294222831726074e-01 2.834273376464843750e+02
5.000000000000000000e+01 6.751153846153849827e+02 2.911057128906250000e+02 -3.096618652343750000e+00 1.132126897573471069e-01 2.352941185235977173e-01 3.010188903808593750e+02
3.000000000000000000e+01 6.954615384615387939e+02 2.834231872558593750e+02 -3.161773681640625000e+00 1.206141486763954163e-01 8.235294222831726074e-01 3.080261840820312500e+02
2.300000000000000000e+01 7.126153846153848690e+02 2.083734741210937500e+02 -3.294860839843750000e+00 1.506759375333786011e-01 2.352941185235977173e-01 3.067828979492187500e+02
4.700000000000000000e+01 7.114846153846154948e+02 1.899971618652343750e+02 -3.371368408203125000e+00 1.507180333137512207e-01 2.352941185235977173e-01 2.805092468261718750e+02
3.400000000000000000e+01 7.164769230769231854e+02 1.865599975585937500e+02 -3.447845458984375000e+00 1.734083294868469238e-01 7.647058963775634766e-01 2.853598022460937500e+02
6.500000000000000000e+01 6.999230769230769056e+02 1.639112854003906250e+02 -3.621856689453125000e+00 1.658741533756256104e-01 3.529411852359771729e-01 2.605407714843750000e+02
2.800000000000000000e+01 6.921923076923075087e+02 1.018481674194335938e+02 -3.859008789062500000e+00 2.013199627399444580e-01 5.882353186607360840e-01 2.490290527343750000e+02
3.300000000000000000e+01 6.787461538461537884e+02 7.711938476562500000e+01 -3.977569580078125000e+00 2.074009925127029419e-01 0.000000000000000000e+00 2.350244140625000000e+02
4.400000000000000000e+01 6.669692307692306485e+02 6.294017028808593750e+01 -4.060150146484375000e+00 2.040824145078659058e-01 3.529411852359771729e-01 2.091578826904296875e+02
4.400000000000000000e+01 6.552538461538460979e+02 4.950496292114257812e+01 -4.130706787109375000e+00 2.003007531166076660e-01 0.000000000000000000e+00 1.805821228027343750e+02
1.900000000000000000e+01 6.516538461538463025e+02 4.392456436157226562e+01 -4.201293945312500000e+00 2.102406024932861328e-01 0.000000000000000000e+00 1.670778808593750000e+02
8.000000000000000000e+00 6.391692307692309214e+02 5.037559509277343750e+01 -4.271850585937500000e+00 2.099648863077163696e-01 0.000000000000000000e+00 1.409779663085937500e+02
2.700000000000000000e+01 6.289615384615382254e+02 5.819455337524414062e+01 -4.207641601562500000e+00 2.135815173387527466e-01 0.000000000000000000e+00 1.217113189697265625e+02
1.600000000000000000e+01 6.194538461538460297e+02 6.570181274414062500e+01 -4.143402099609375000e+00 2.213387191295623779e-01 0.000000000000000000e+00 1.140221328735351562e+02
1.500000000000000000e+01 6.094999999999998863e+02 7.534423828125000000e+01 -4.079193115234375000e+00 2.317182719707489014e-01 0.000000000000000000e+00 1.092278289794921875e+02
2.300000000000000000e+01 5.938846153846156994e+02 9.126393890380859375e+01 -3.986175537109375000e+00 2.283959537744522095e-01 5.294117927551269531e-01 1.181062011718750000e+02
1.900000000000000000e+01 5.830230769230768146e+02 1.246860275268554688e+02 -3.806793212890625000e+00 2.192522138357162476e-01 0.000000000000000000e+00 8.047300720214843750e+01
2.300000000000000000e+01 5.735769230769229807e+02 1.685599365234375000e+02 -3.627410888671875000e+00 2.261675596237182617e-01 0.000000000000000000e+00 6.600099182128906250e+01
2.800000000000000000e+01 5.590923076923074859e+02 2.084844665527343750e+02 -3.448028564453125000e+00 2.036116719245910645e-01 0.000000000000000000e+00 3.398936080932617188e+01
1.700000000000000000e+01 5.432230769230770875e+02 2.401181945800781250e+02 -3.531280517578125000e+00 1.900922656059265137e-01 0.000000000000000000e+00 1.003373146057128906e+01
2.700000000000000000e+01 6.460769230769230944e+02 3.092016601562500000e+02 -3.081390380859375000e+00 2.087524235248565674e-01 2.941176593303680420e-01 3.863070678710937500e+01
1.900000000000000000e+01 6.746230769230768374e+02 3.122187194824218750e+02 -3.327209472656250000e+00 2.453102618455886841e-01 2.941176593303680420e-01 1.156008605957031250e+02
3.100000000000000000e+01 7.025000000000000000e+02 3.140529479980468750e+02 -3.573028564453125000e+00 2.723836302757263184e-01 5.882353186607360840e-01 1.709339904785156250e+02
2.500000000000000000e+01 7.167384615384618201e+02 3.153297729492187500e+02 -3.818847656250000000e+00 2.937584221363067627e-01 0.000000000000000000e+00 2.129518890380859375e+02
2.600000000000000000e+01 7.305769230769235492e+02 3.170885314941406250e+02 -4.062896728515625000e+00 2.764231562614440918e-01 0.000000000000000000e+00 1.884621582031250000e+02
2.000000000000000000e+01 7.370999999999999091e+02 3.178912658691406250e+02 -4.301605224609375000e+00 2.898727059364318848e-01 0.000000000000000000e+00 2.307463989257812500e+02
1.700000000000000000e+01 7.426538461538463025e+02 3.185964355468750000e+02 -4.540313720703125000e+00 2.972530126571655273e-01 0.000000000000000000e+00 2.635260009765625000e+02
3.600000000000000000e+01 7.795615384615385892e+02 2.232024536132812500e+02 -5.035156250000000000e+00 3.807469904422760010e-01 5.882353186607360840e-01 3.942628479003906250e+02
3.400000000000000000e+01 7.832538461538462116e+02 2.076569061279296875e+02 -5.126312255859375000e+00 4.209083616733551025e-01 3.529411852359771729e-01 4.429633789062500000e+02
2.900000000000000000e+01 7.911769230769231172e+02 2.095191040039062500e+02 -5.217498779296875000e+00 3.786080181598663330e-01 8.823529481887817383e-01 4.351137390136718750e+02
2.200000000000000000e+01 8.076461538461537657e+02 2.163478393554687500e+02 -5.208221435546875000e+00 4.120880961418151855e-01 6.470588445663452148e-01 4.853113708496093750e+02
2.000000000000000000e+01 8.368538461538464617e+02 2.293197326660156250e+02 -5.165435791015625000e+00 5.005576610565185547e-01 5.882353186607360840e-01 5.591976318359375000e+02
1.400000000000000000e+01 8.610076923076916273e+02 2.463867492675781250e+02 -5.122680664062500000e+00 4.640001356601715088e-01 2.941176593303680420e-01 5.223389892578125000e+02
1.000000000000000000e+01 8.881076923076926732e+02 2.656800537109375000e+02 -5.079895019531250000e+00 5.087499022483825684e-01 5.882353186607360840e-01 5.364581909179687500e+02
2.900000000000000000e+01 8.877384615384619337e+02 2.983283081054687500e+02 -5.071899414062500000e+00 4.439852535724639893e-01 6.470588445663452148e-01 5.481809082031250000e+02
1.900000000000000000e+01 9.212615384615385210e+02 4.186669921875000000e+02 -5.349548339843750000e+00 4.552588164806365967e-01 0.000000000000000000e+00 6.612443237304687500e+02
2.800000000000000000e+01 9.083461538461544933e+02 4.178798522949218750e+02 -5.437469482421875000e+00 4.778791069984436035e-01 0.000000000000000000e+00 6.098084716796875000e+02
1.500000000000000000e+01 8.860461538461536293e+02 4.161001281738281250e+02 -5.521118164062500000e+00 4.055752456188201904e-01 0.000000000000000000e+00 5.787210693359375000e+02
2.700000000000000000e+01 8.495538461538458250e+02 4.102046813964843750e+02 -5.604736328125000000e+00 3.748197853565216064e-01 0.000000000000000000e+00 5.304384765625000000e+02
2.900000000000000000e+01 8.505846153846158586e+02 3.694423828125000000e+02 -5.661163330078125000e+00 5.131911635398864746e-01 0.000000000000000000e+00 6.244659423828125000e+02
4.000000000000000000e+01 8.755923076923080544e+02 3.349868164062500000e+02 -5.597045898437500000e+00 3.790163695812225342e-01 0.000000000000000000e+00 4.982647094726562500e+02
4.500000000000000000e+01 9.040538461538460524e+02 3.086871032714843750e+02 -5.532897949218750000e+00 3.562097549438476562e-01 0.000000000000000000e+00 4.988752136230468750e+02
4.700000000000000000e+01 9.164153846153847098e+02 2.962095947265625000e+02 -5.191833496093750000e+00 2.710934579372406006e-01 0.000000000000000000e+00 3.474044799804687500e+02
5.300000000000000000e+01 9.420923076923080544e+02 2.974545898437500000e+02 -4.914855957031250000e+00 3.288998901844024658e-01 0.000000000000000000e+00 4.313728332519531250e+02
3.800000000000000000e+01 9.721000000000001364e+02 4.121926879882812500e+02 -3.896697998046875000e+00 2.190895080566406250e-01 5.294117927551269531e-01 4.190651245117187500e+02
5.500000000000000000e+01 1.054130769230769374e+03 4.529741516113281250e+02 -2.626739501953125000e+00 1.773328036069869995e-01 0.000000000000000000e+00 4.746421203613281250e+02
4.000000000000000000e+01 1.146369230769231081e+03 4.674764404296875000e+02 -1.815032958984375000e+00 1.723193824291229248e-01 0.000000000000000000e+00 4.635406188964843750e+02
5.000000000000000000e+01 1.141030769230769693e+03 4.646488037109375000e+02 -1.409179687500000000e+00 1.092674583196640015e-01 0.000000000000000000e+00 3.130515747070312500e+02
2.100000000000000000e+01 1.118661538461538157e+03 4.555061950683593750e+02 -1.080322265625000000e+00 9.999999776482582092e-03 0.000000000000000000e+00 1.431709442138671875e+02
4.700000000000000000e+01 1.140469230769230307e+03 4.458978271484375000e+02 -7.771301269531250000e-01 9.999999776482582092e-03 0.000000000000000000e+00 2.891454467773437500e+02
5.800000000000000000e+01 1.135253846153846325e+03 4.282977905273437500e+02 -4.739379882812500000e-01 9.999999776482582092e-03 0.000000000000000000e+00 1.702579040527343750e+02
4.900000000000000000e+01 1.098192307692308077e+03 4.056707458496093750e+02 -1.707458496093750000e-01 9.999999776482582092e-03 0.000000000000000000e+00 7.643042755126953125e+01
1.900000000000000000e+01 1.129315384615385028e+03 4.110186157226562500e+02 9.957946777343750000e+00 0.000000000000000000e+00 0.000000000000000000e+00 3.108976936340332031e+01
1.700000000000000000e+01 1.006730769230769283e+03 3.924212951660156250e+02 9.708465576171875000e+00 0.000000000000000000e+00 2.941176593303680420e-01 7.254427337646484375e+01
2.000000000000000000e+01 9.126076923076926732e+02 3.080937805175781250e+02 9.459014892578125000e+00 0.000000000000000000e+00 2.941176593303680420e-01 4.969693374633789062e+01
4.900000000000000000e+01 8.451769230769234582e+02 3.176380615234375000e+02 9.384613037109375000e+00 0.000000000000000000e+00 5.882352963089942932e-02 8.445209503173828125e+01
2.400000000000000000e+01 8.535692307692308987e+02 3.538626403808593750e+02 9.485229492187500000e+00 0.000000000000000000e+00 6.470588445663452148e-01 8.253556823730468750e+01
4.000000000000000000e+01 9.819769230769229580e+02 3.321611633300781250e+02 9.585845947265625000e+00 0.000000000000000000e+00 0.000000000000000000e+00 2.497720031738281250e+02
2.600000000000000000e+01 1.323838461538461843e+03 4.160611267089843750e+02 9.281250000000000000e+00 0.000000000000000000e+00 0.000000000000000000e+00 5.903376007080078125e+01
2.400000000000000000e+01 1.405892307692308123e+03 4.485731811523437500e+02 9.124725341796875000e+00 0.000000000000000000e+00 0.000000000000000000e+00 1.589760437011718750e+02
3.000000000000000000e+01 1.035807692307691923e+03 4.029175109863281250e+02 9.039489746093750000e+00 0.000000000000000000e+00 0.000000000000000000e+00 1.654550933837890625e+02
2.600000000000000000e+01 8.732461538461539021e+02 2.787455139160156250e+02 8.954223632812500000e+00 0.000000000000000000e+00 0.000000000000000000e+00 4.889411544799804688e+01
4.100000000000000000e+01 9.300307692307690104e+02 2.920884399414062500e+02 8.868988037109375000e+00 0.000000000000000000e+00 0.000000000000000000e+00 1.004256134033203125e+02
5.700000000000000000e+01 6.761769230769233445e+02 2.709825439453125000e+02 7.392303466796875000e+00 0.000000000000000000e+00 0.000000000000000000e+00 3.487480926513671875e+01
6.600000000000000000e+01 6.224538461538459160e+02 2.732361755371093750e+02 7.417144775390625000e+00 0.000000000000000000e+00 0.000000000000000000e+00 2.999455261230468750e+01
2.000000000000000000e+00 6.597999999999997272e+02 2.934341125488281250e+02 7.423736572265625000e+00 0.000000000000000000e+00 0.000000000000000000e+00 4.215376663208007812e+01
3.200000000000000000e+01 7.108538461538460069e+02 2.368036499023437500e+02 7.259277343750000000e+00 0.000000000000000000e+00 0.000000000000000000e+00 1.276448516845703125e+02
1.200000000000000000e+01 6.699461538461538339e+02 2.381995849609375000e+02 7.134338378906250000e+00 0.000000000000000000e+00 5.882352963089942932e-02 1.454570617675781250e+02
3.000000000000000000e+01 6.481000000000002501e+02 2.806379394531250000e+02 7.104766845703125000e+00 0.000000000000000000e+00 0.000000000000000000e+00 1.343954620361328125e+02
6.100000000000000000e+01 6.042461538461540158e+02 2.848634948730468750e+02 7.075195312500000000e+00 0.000000000000000000e+00 0.000000000000000000e+00 1.153340759277343750e+02
1.200000000000000000e+01 5.881923076923075087e+02 2.824740295410156250e+02 7.045654296875000000e+00 0.000000000000000000e+00 8.823529481887817383e-01 6.453976440429687500e+01
1.400000000000000000e+01 6.399153846153845961e+02 2.423668060302734375e+02 5.710845947265625000e+00 0.000000000000000000e+00 0.000000000000000000e+00 1.564359283447265625e+02
1.100000000000000000e+01 6.065384615384614335e+02 2.474991760253906250e+02 5.509033203125000000e+00 0.000000000000000000e+00 2.352941185235977173e-01 1.282435913085937500e+02
5.200000000000000000e+01 6.636692307692306940e+02 3.257804260253906250e+02 4.596099853515625000e+00 0.000000000000000000e+00 5.294117927551269531e-01 1.782870788574218750e+02
6.300000000000000000e+01 6.586461538461542204e+02 3.102623596191406250e+02 4.441619873046875000e+00 0.000000000000000000e+00 2.352941185235977173e-01 2.120632781982421875e+02
5.900000000000000000e+01 6.611846153846150855e+02 3.006697692871093750e+02 4.247314453125000000e+00 0.000000000000000000e+00 5.882353186607360840e-01 1.765756225585937500e+02
3.700000000000000000e+01 6.520384615384614335e+02 2.950579223632812500e+02 4.188323974609375000e+00 0.000000000000000000e+00 0.000000000000000000e+00 1.671456451416015625e+02
5.400000000000000000e+01 6.462000000000000455e+02 2.955812683105468750e+02 4.129333496093750000e+00 0.000000000000000000e+00 5.294117927551269531e-01 1.733882751464843750e+02
1.500000000000000000e+01 6.295000000000001137e+02 2.890779418945312500e+02 3.916168212890625000e+00 0.000000000000000000e+00 8.823529481887817383e-01 1.623833618164062500e+02
4.800000000000000000e+01 6.398000000000002956e+02 2.889696960449218750e+02 3.793701171875000000e+00 0.000000000000000000e+00 4.705882370471954346e-01 1.781728363037109375e+02
1.300000000000000000e+01 6.547538461538460979e+02 2.893145751953125000e+02 3.671234130859375000e+00 0.000000000000000000e+00 1.000000000000000000e+00 1.524963531494140625e+02
6.700000000000000000e+01 6.425538461538460524e+02 2.882850646972656250e+02 3.479949951171875000e+00 0.000000000000000000e+00 5.294117927551269531e-01 1.946869812011718750e+02
1.600000000000000000e+01 6.583615384615385437e+02 3.015900268554687500e+02 3.388122558593750000e+00 0.000000000000000000e+00 7.647058963775634766e-01 1.931282348632812500e+02
9.000000000000000000e+00 6.502384615384617064e+02 3.250744628906250000e+02 3.296325683593750000e+00 0.000000000000000000e+00 1.235294103622436523e+00 1.714780273437500000e+02
6.800000000000000000e+01 6.505769230769233218e+02 3.011907653808593750e+02 3.306701660156250000e+00 0.000000000000000000e+00 8.235294222831726074e-01 1.892832183837890625e+02
5.500000000000000000e+01 6.563230769230769965e+02 2.827513732910156250e+02 3.317108154296875000e+00 0.000000000000000000e+00 5.294117927551269531e-01 1.902006378173828125e+02
1.600000000000000000e+01 6.681461538461536520e+02 2.734565124511718750e+02 3.327484130859375000e+00 0.000000000000000000e+00 0.000000000000000000e+00 1.757378540039062500e+02
6.200000000000000000e+01 6.639230769230764508e+02 2.684804382324218750e+02 3.343688964843750000e+00 0.000000000000000000e+00 5.882353186607360840e-01 2.175940399169921875e+02
5.000000000000000000e+01 6.145461538461539703e+02 2.080854797363281250e+02 2.938537597656250000e+00 0.000000000000000000e+00 0.000000000000000000e+00 1.477017517089843750e+02
6.000000000000000000e+00 5.852230769230768601e+02 1.956482543945312500e+02 2.620422363281250000e+00 0.000000000000000000e+00 2.000000000000000000e+00 1.457628326416015625e+02
5.100000000000000000e+01 5.504769230769227306e+02 1.757204437255859375e+02 2.609649658203125000e+00 0.000000000000000000e+00 5.882353186607360840e-01 2.283115539550781250e+02
3.000000000000000000e+01 5.266999999999998181e+02 1.750017700195312500e+02 2.726196289062500000e+00 0.000000000000000000e+00 1.705882310867309570e+00 2.345110778808593750e+02
1.000000000000000000e+01 4.827538461538461547e+02 1.745601348876953125e+02 2.836425781250000000e+00 0.000000000000000000e+00 1.294117689132690430e+00 1.959526367187500000e+02
1.800000000000000000e+01 4.737923076923076451e+02 1.671339721679687500e+02 2.916076660156250000e+00 0.000000000000000000e+00 2.176470518112182617e+00 5.026372909545898438e+01
5.900000000000000000e+01 5.107846153846153925e+02 2.108297119140625000e+02 5.923767089843750000e-01 0.000000000000000000e+00 0.000000000000000000e+00 4.962461242675781250e+02
5.000000000000000000e+01 4.876538461538460183e+02 2.010693817138671875e+02 5.113830566406250000e-01 0.000000000000000000e+00 0.000000000000000000e+00 4.943657226562500000e+02
5.800000000000000000e+01 4.708461538461538680e+02 1.847145080566406250e+02 4.303894042968750000e-01 9.999999776482582092e-03 0.000000000000000000e+00 7.470801391601562500e+02
1.700000000000000000e+01 4.633692307692306258e+02 1.573702392578125000e+02 3.817749023437500000e-01 0.000000000000000000e+00 5.882353186607360840e-01 5.972934570312500000e+02
2.000000000000000000e+01 4.372307692307691696e+02 1.369483184814453125e+02 4.302368164062500000e-01 0.000000000000000000e+00 5.882353186607360840e-01 4.723541564941406250e+02
1.700000000000000000e+01 4.170846153846154039e+02 1.473804016113281250e+02 6.259765625000000000e-01 0.000000000000000000e+00 1.588235259056091309e+00 3.902423706054687500e+02
5.000000000000000000e+00 3.809846153846153811e+02 1.481359558105468750e+02 9.240722656250000000e-01 0.000000000000000000e+00 2.176470518112182617e+00 2.401904754638671875e+02
1.000000000000000000e+00 3.712769230769232536e+02 1.481296844482421875e+02 1.073120117187500000e+00 0.000000000000000000e+00 2.176470518112182617e+00 2.186956634521484375e+02
1.000000000000000000e+00 3.635538461538459956e+02 1.337976531982421875e+02 1.536285400390625000e+00 0.000000000000000000e+00 2.823529481887817383e+00 1.133337020874023438e+02
1.000000000000000000e+00 3.389846153846153243e+02 1.230257568359375000e+02 6.589050292968750000e-01 0.000000000000000000e+00 1.470588207244873047e+00 1.405817260742187500e+02
1.000000000000000000e+00 3.516846153846155403e+02 1.245700531005859375e+02 9.854125976562500000e-01 0.000000000000000000e+00 1.294117689132690430e+00 8.192353820800781250e+01
1.000000000000000000e+00 3.529230769230770193e+02 1.275863265991210938e+02 1.057525634765625000e+00 0.000000000000000000e+00 1.823529362678527832e+00 8.067521667480468750e+01
1.000000000000000000e+00 3.461846153846153697e+02 1.382463226318359375e+02 1.883544921875000000e-01 0.000000000000000000e+00 2.705882310867309570e+00 1.767469940185546875e+02
9.000000000000000000e+00 3.777384615384614222e+02 1.485540771484375000e+02 1.212463378906250000e-01 0.000000000000000000e+00 2.000000000000000000e+00 1.748299102783203125e+02
6.000000000000000000e+00 4.041692307692306940e+02 1.489909362792968750e+02 7.171630859375000000e-02 0.000000000000000000e+00 2.000000000000000000e+00 2.250011291503906250e+02
3.000000000000000000e+01 4.448000000000000682e+02 1.633079528808593750e+02 7.836914062500000000e-02 0.000000000000000000e+00 1.764705896377563477e+00 1.148951110839843750e+02
6.200000000000000000e+01 4.549230769230765645e+02 1.852150878906250000e+02 8.169555664062500000e-02 0.000000000000000000e+00 1.941176414489746094e+00 1.501033630371093750e+02
5.500000000000000000e+01 4.798230769230769965e+02 2.097531890869140625e+02 6.259155273437500000e-02 0.000000000000000000e+00 1.000000000000000000e+00 1.689862670898437500e+02
1.900000000000000000e+01 4.963153846153848008e+02 2.079432373046875000e+02 4.873657226562500000e-02 0.000000000000000000e+00 1.411764740943908691e+00 1.827316131591796875e+02
6.000000000000000000e+00 5.167000000000001592e+02 2.017548980712890625e+02 3.488159179687500000e-02 0.000000000000000000e+00 1.470588207244873047e+00 2.268320465087890625e+02
7.000000000000000000e+00 5.395076923076923094e+02 1.910419616699218750e+02 -7.003784179687500000e-02 0.000000000000000000e+00 7.058823704719543457e-01 1.828464050292968750e+02
5.600000000000000000e+01 5.578230769230766555e+02 1.990754394531250000e+02 -3.406677246093750000e-01 0.000000000000000000e+00 0.000000000000000000e+00 2.825453796386718750e+02
5.700000000000000000e+01 5.627384615384611379e+02 2.093250579833984375e+02 -4.759521484375000000e-01 0.000000000000000000e+00 0.000000000000000000e+00 4.201304016113281250e+02
5.700000000000000000e+01 5.604461538461540613e+02 2.135458831787109375e+02 -7.131958007812500000e-01 0.000000000000000000e+00 2.941176593303680420e-01 3.580628051757812500e+02
5.900000000000000000e+01 5.433307692307691923e+02 2.908336181640625000e+02 -1.411987304687500000e+00 0.000000000000000000e+00 0.000000000000000000e+00 3.096816711425781250e+02
5.100000000000000000e+01 5.654538461538461434e+02 2.998833007812500000e+02 -1.597442626953125000e+00 9.999999776482582092e-03 0.000000000000000000e+00 6.666257324218750000e+02
1.000000000000000000e+00 5.953076923076923777e+02 2.689556579589843750e+02 -1.782897949218750000e+00 7.728424668312072754e-01 0.000000000000000000e+00 1.343281860351562500e+03
5.600000000000000000e+01 5.665076923076924231e+02 2.036329803466796875e+02 -1.968353271484375000e+00 2.148045152425765991e-01 7.647058963775634766e-01 9.308417358398437500e+02
3.000000000000000000e+00 5.058538461538462343e+02 1.514337310791015625e+02 -2.235748291015625000e+00 0.000000000000000000e+00 1.235294103622436523e+00 4.613574829101562500e+02
1.200000000000000000e+01 4.848384615384615586e+02 1.565667877197265625e+02 -2.352203369140625000e+00 0.000000000000000000e+00 1.352941155433654785e+00 2.578930053710937500e+02
3.600000000000000000e+01 5.750307692307694651e+02 2.036455383300781250e+02 -2.655426025390625000e+00 0.000000000000000000e+00 2.058823585510253906e+00 3.895154113769531250e+02
2.200000000000000000e+01 6.085000000000001137e+02 2.307854003906250000e+02 -2.865631103515625000e+00 0.000000000000000000e+00 2.058823585510253906e+00 4.096572875976562500e+02
1.900000000000000000e+01 6.651769230769228898e+02 2.747150573730468750e+02 -3.075836181640625000e+00 1.088252589106559753e-01 1.000000000000000000e+00 4.425614013671875000e+02
6.600000000000000000e+01 7.083538461538462343e+02 3.052551269531250000e+02 -3.286041259765625000e+00 9.999999776482582092e-03 2.352941185235977173e-01 7.370223999023437500e+02
3.400000000000000000e+01 6.929615384615383391e+02 3.203507995605468750e+02 -3.609100341796875000e+00 2.174956202507019043e-01 0.000000000000000000e+00 7.862336425781250000e+02
6.100000000000000000e+01 6.789846153846151537e+02 3.213821411132812500e+02 -3.932189941406250000e+00 9.999999776482582092e-03 2.941176593303680420e-01 5.310271606445312500e+02
5.300000000000000000e+01 6.490769230769229807e+02 2.855545043945312500e+02 -4.255249023437500000e+00 1.195237487554550171e-01 0.000000000000000000e+00 8.013911743164062500e+02
1.400000000000000000e+01 6.491384615384619110e+02 2.375512847900390625e+02 -4.596435546875000000e+00 8.580216765403747559e-01 0.000000000000000000e+00 1.525041992187500000e+03
2.000000000000000000e+00 6.313076923076924913e+02 2.101873474121093750e+02 -4.991851806640625000e+00 4.823752641677856445e-01 0.000000000000000000e+00 1.332421142578125000e+03
5.500000000000000000e+01 5.616615384615383846e+02 2.202737884521484375e+02 -6.058227539062500000e+00 8.348370194435119629e-01 2.352941185235977173e-01 1.728431030273437500e+03
6.400000000000000000e+01 5.238461538461538112e+02 2.358521728515625000e+02 -6.213836669921875000e+00 7.034131288528442383e-01 9.411764740943908691e-01 1.200379150390625000e+03
6.900000000000000000e+01 4.994538461538462570e+02 2.363329315185546875e+02 -6.369445800781250000e+00 3.124577701091766357e-01 5.882353186607360840e-01 9.795932006835937500e+02
6.000000000000000000e+01 4.778615384615389416e+02 2.307171478271484375e+02 -6.525054931640625000e+00 5.210745930671691895e-01 0.000000000000000000e+00 1.256443847656250000e+03
4.900000000000000000e+01 4.319769230769227875e+02 2.233281250000000000e+02 -6.321868896484375000e+00 4.425121843814849854e-01 5.882353186607360840e-01 1.026838134765625000e+03
6.700000000000000000e+01 4.152384615384617064e+02 2.127367095947265625e+02 -5.999053955078125000e+00 2.880729138851165771e-01 0.000000000000000000e+00 7.224898681640625000e+02
4.600000000000000000e+01 4.117076923076925254e+02 1.979284667968750000e+02 -5.676239013671875000e+00 9.999999776482582092e-03 2.941176593303680420e-01 5.628914794921875000e+02
2.100000000000000000e+01 4.184384615384617518e+02 1.863694000244140625e+02 -5.353424072265625000e+00 9.999999776482582092e-03 5.882353186607360840e-01 5.385350341796875000e+02
1.300000000000000000e+01 4.319230769230769056e+02 1.802341003417968750e+02 -4.814178466796875000e+00 9.999999776482582092e-03 1.000000000000000000e+00 4.796734008789062500e+02
4.400000000000000000e+01 4.617076923076922412e+02 1.790500640869140625e+02 -4.274932861328125000e+00 9.999999776482582092e-03 1.529411792755126953e+00 5.151445922851562500e+02
1.000000000000000000e+01 4.814538461538462002e+02 1.761276092529296875e+02 -3.735687255859375000e+00 9.999999776482582092e-03 1.117647051811218262e+00 4.188715820312500000e+02
5.900000000000000000e+01 5.230769230769228670e+02 1.605431365966796875e+02 -3.056854248046875000e+00 1.379274725914001465e-01 6.470588445663452148e-01 6.335028076171875000e+02
6.600000000000000000e+01 5.222461538461537884e+02 1.559908599853515625e+02 -2.837310791015625000e+00 1.600747704505920410e-01 6.470588445663452148e-01 7.724036865234375000e+02
6.300000000000000000e+01 4.926615384615383277e+02 1.516825256347656250e+02 -2.617797851562500000e+00 2.991024553775787354e-01 8.823529481887817383e-01 8.740371704101562500e+02
2.800000000000000000e+01 4.566923076923076223e+02 1.505426788330078125e+02 -2.611755371093750000e+00 3.463973402976989746e-01 1.058823585510253906e+00 8.969523925781250000e+02
3.000000000000000000e+01 4.200923076923079407e+02 1.496013946533203125e+02 -2.819244384765625000e+00 3.175704777240753174e-01 1.117647051811218262e+00 8.649488525390625000e+02
5.900000000000000000e+01 3.961000000000003070e+02 1.437153778076171875e+02 -3.234252929687500000e+00 3.408461213111877441e-01 1.235294103622436523e+00 7.685894775390625000e+02
5.900000000000000000e+01 3.976230769230770079e+02 1.395967712402343750e+02 -3.923248291015625000e+00 4.769078493118286133e-01 5.882353186607360840e-01 1.028463867187500000e+03
4.100000000000000000e+01 3.705076923076924800e+02 1.373609313964843750e+02 -4.772735595703125000e+00 1.462555825710296631e-01 0.000000000000000000e+00 6.791954956054687500e+02
7.000000000000000000e+01 3.673153846153846303e+02 1.483517761230468750e+02 -7.094421386718750000e+00 2.608558535575866699e-01 0.000000000000000000e+00 6.516162109375000000e+02
5.600000000000000000e+01 4.001307692307690900e+02 1.504450378417968750e+02 -7.717071533203125000e+00 8.245906233787536621e-01 6.470588445663452148e-01 9.849223022460937500e+02
2.000000000000000000e+00 3.893769230769227079e+02 1.564390106201171875e+02 -8.339721679687500000e+00 1.764696985483169556e-01 1.823529362678527832e+00 5.946263427734375000e+02
1.000000000000000000e+01 4.479999999999997726e+02 1.541206207275390625e+02 -8.925109863281250000e+00 9.047316908836364746e-01 1.117647051811218262e+00 1.504110839843750000e+03
2.500000000000000000e+01 4.301076923076922753e+02 1.514256134033203125e+02 -9.019805908203125000e+00 7.688111662864685059e-01 1.470588207244873047e+00 1.210053222656250000e+03
9.000000000000000000e+00 4.229846153846153243e+02 1.514705047607421875e+02 -9.114532470703125000e+00 7.161595821380615234e-01 1.411764740943908691e+00 1.181908325195312500e+03
9.000000000000000000e+00 4.045538461538459956e+02 1.563854522705078125e+02 -8.975555419921875000e+00 7.728053331375122070e-01 1.117647051811218262e+00 1.255910278320312500e+03
2.300000000000000000e+01 3.819461538461539476e+02 1.596335601806640625e+02 -8.602874755859375000e+00 5.362719297409057617e-01 1.176470637321472168e+00 1.023330078125000000e+03
4.100000000000000000e+01 3.902153846153844938e+02 1.514958953857421875e+02 -8.230194091796875000e+00 7.647775411605834961e-01 1.117647051811218262e+00 1.247424682617187500e+03
1.700000000000000000e+01 3.923615384615383164e+02 1.580484466552734375e+02 -7.857543945312500000e+00 3.775653839111328125e-01 1.470588207244873047e+00 7.929450683593750000e+02
2.700000000000000000e+01 4.037461538461537884e+02 1.671885681152343750e+02 -7.571990966796875000e+00 5.864650607109069824e-01 1.529411792755126953e+00 1.021948425292968750e+03
1.200000000000000000e+01 4.107307692307691127e+02 1.621220092773437500e+02 -7.315490722656250000e+00 7.607675790786743164e-01 5.882353186607360840e-01 1.197132934570312500e+03
5.500000000000000000e+01 4.198153846153845166e+02 1.505040588378906250e+02 -7.058990478515625000e+00 6.940737962722778320e-01 8.823529481887817383e-01 1.011262451171875000e+03
1.800000000000000000e+01 4.240153846153849599e+02 1.497126617431640625e+02 -6.802490234375000000e+00 7.830154299736022949e-01 1.058823585510253906e+00 1.166115722656250000e+03
2.800000000000000000e+01 4.472769230769230262e+02 1.515205230712890625e+02 -6.819305419921875000e+00 8.273861408233642578e-01 4.117647111415863037e-01 1.268176025390625000e+03
1.200000000000000000e+01 4.440923076923075996e+02 1.512732696533203125e+02 -6.827728271484375000e+00 8.576226234436035156e-01 2.352941185235977173e-01 1.126044555664062500e+03
4.700000000000000000e+01 4.217923076923078725e+02 1.748415222167968750e+02 -6.925964355468750000e+00 6.030721664428710938e-01 9.411764740943908691e-01 8.365486450195312500e+02
1.800000000000000000e+01 4.242846153846156767e+02 1.769952392578125000e+02 -6.999481201171875000e+00 4.893863797187805176e-01 5.882353186607360840e-01 8.414293823242187500e+02
1.900000000000000000e+01 4.277461538461539021e+02 1.852954254150390625e+02 -7.069946289062500000e+00 4.151145815849304199e-01 1.411764740943908691e+00 6.386143188476562500e+02
2.500000000000000000e+01 4.273230769230771102e+02 1.792328796386718750e+02 -6.990325927734375000e+00 5.604011416435241699e-01 8.823529481887817383e-01 6.152903442382812500e+02
4.400000000000000000e+01 4.321384615384616268e+02 1.848183441162109375e+02 -6.910705566406250000e+00 4.067052006721496582e-01 7.058823704719543457e-01 5.215383300781250000e+02
2.100000000000000000e+01 4.365153846153847326e+02 1.918720855712890625e+02 -6.831085205078125000e+00 3.566549122333526611e-01 9.411764740943908691e-01 4.698013916015625000e+02
5.200000000000000000e+01 4.353076923076920934e+02 1.998237304687500000e+02 -6.656158447265625000e+00 4.655219316482543945e-01 1.117647051811218262e+00 5.571441650390625000e+02
5.400000000000000000e+01 4.515000000000000000e+02 2.086703643798828125e+02 -6.449462890625000000e+00 3.285503983497619629e-01 7.647058963775634766e-01 3.807449951171875000e+02
4.300000000000000000e+01 4.591461538461541636e+02 2.148208923339843750e+02 -6.242767333984375000e+00 3.543790876865386963e-01 1.000000000000000000e+00 3.854756774902343750e+02
3.200000000000000000e+01 4.697769230769227420e+02 2.176598510742187500e+02 -6.036071777343750000e+00 3.789190649986267090e-01 1.352941155433654785e+00 4.277468566894531250e+02
2.300000000000000000e+01 4.828846153846152447e+02 2.219999694824218750e+02 -5.850524902343750000e+00 5.355941653251647949e-01 1.352941155433654785e+00 6.398280639648437500e+02
5.200000000000000000e+01 4.899076923076924572e+02 2.232220458984375000e+02 -5.664978027343750000e+00 3.534328043460845947e-01 8.235294222831726074e-01 4.588500061035156250e+02
4.500000000000000000e+01 5.047153846153845507e+02 2.134233703613281250e+02 -5.479400634765625000e+00 3.741862177848815918e-01 7.647058963775634766e-01 3.962521972656250000e+02
3.700000000000000000e+01 5.087307692307692264e+02 2.061346130371093750e+02 -5.336975097656250000e+00 3.246734142303466797e-01 6.470588445663452148e-01 3.448074951171875000e+02
5.500000000000000000e+01 5.120230769230765873e+02 2.079472045898437500e+02 -5.323883056640625000e+00 2.195039689540863037e-01 1.058823585510253906e+00 2.971365356445312500e+02
2.800000000000000000e+01 5.206538461538461888e+02 2.038422546386718750e+02 -5.310760498046875000e+00 2.972567677497863770e-01 1.764705896377563477e+00 3.087251281738281250e+02
6.000000000000000000e+01 5.396384615384613426e+02 1.986232604980468750e+02 -5.445709228515625000e+00 4.442560076713562012e-01 0.000000000000000000e+00 6.805519409179687500e+02
7.400000000000000000e+01 5.615615384615387029e+02 2.007452239990234375e+02 -5.754913330078125000e+00 6.228386163711547852e-01 5.882353186607360840e-01 6.710815429687500000e+02
3.100000000000000000e+01 5.761461538461537657e+02 1.992386016845703125e+02 -6.064147949218750000e+00 4.474319517612457275e-01 3.529411852359771729e-01 4.189495239257812500e+02
7.100000000000000000e+01 5.772538461538462116e+02 2.071404418945312500e+02 -6.373352050781250000e+00 6.321370601654052734e-01 1.470588207244873047e+00 5.985648803710937500e+02
7.300000000000000000e+01 5.823692307692309669e+02 2.206533203125000000e+02 -6.731781005859375000e+00 7.442041635513305664e-01 0.000000000000000000e+00 6.495366821289062500e+02
6.500000000000000000e+01 5.791769230769231172e+02 2.203326721191406250e+02 -7.106597900390625000e+00 7.007491588592529297e-01 0.000000000000000000e+00 7.980510253906250000e+02
6.500000000000000000e+01 5.856923076923078497e+02 2.221921691894531250e+02 -7.481414794921875000e+00 7.619627714157104492e-01 5.882353186607360840e-01 7.272557983398437500e+02
7.100000000000000000e+01 6.161769230769230035e+02 2.315166168212890625e+02 -7.856231689453125000e+00 9.007159471511840820e-01 2.941176593303680420e-01 1.064235473632812500e+03
5.400000000000000000e+01 6.268692307692305121e+02 2.434445190429687500e+02 -7.940185546875000000e+00 6.440164446830749512e-01 8.823529481887817383e-01 6.317657470703125000e+02
5.900000000000000000e+01 6.266384615384615699e+02 2.533706359863281250e+02 -8.024139404296875000e+00 6.671721339225769043e-01 0.000000000000000000e+00 5.513204345703125000e+02
1.600000000000000000e+01 6.411307692307693742e+02 2.629225463867187500e+02 -8.108093261718750000e+00 4.269162118434906006e-01 5.882352963089942932e-02 2.647283020019531250e+02
4.300000000000000000e+01 6.462384615384612516e+02 2.819939880371093750e+02 -8.111968994140625000e+00 5.313253998756408691e-01 9.411764740943908691e-01 3.887312622070312500e+02
3.600000000000000000e+01 6.899461538461540613e+02 3.093495178222656250e+02 -7.875701904296875000e+00 4.943093955516815186e-01 5.882353186607360840e-01 5.211485595703125000e+02
5.600000000000000000e+01 7.167153846153848917e+02 3.237865295410156250e+02 -7.639434814453125000e+00 9.830788969993591309e-01 1.176470592617988586e-01 1.281145751953125000e+03
1.100000000000000000e+01 7.423769230769231626e+02 3.189864501953125000e+02 -7.403137207031250000e+00 9.991808533668518066e-01 5.294117927551269531e-01 1.723851074218750000e+03
5.200000000000000000e+01 7.216307692307693742e+02 3.071128845214843750e+02 -6.974792480468750000e+00 7.581855058670043945e-01 0.000000000000000000e+00 6.497443237304687500e+02
2.900000000000000000e+01 6.919153846153845961e+02 2.976982421875000000e+02 -6.354309082031250000e+00 4.758618474006652832e-01 5.294117927551269531e-01 4.778408508300781250e+02
5.400000000000000000e+01 6.725076923076923094e+02 2.896170043945312500e+02 -5.733856201171875000e+00 3.970580101013183594e-01 5.882352963089942932e-02 3.143486633300781250e+02
4.200000000000000000e+01 6.630076923076924231e+02 2.804465637207031250e+02 -4.730133056640625000e+00 6.432682275772094727e-01 0.000000000000000000e+00 3.407646484375000000e+02
1.600000000000000000e+01 6.769000000000000909e+02 2.651763000488281250e+02 -3.817504882812500000e+00 4.103102385997772217e-01 1.176470592617988586e-01 2.825400390625000000e+02
1.600000000000000000e+01 6.856461538461539931e+02 2.578757934570312500e+02 -3.388092041015625000e+00 2.026547640562057495e-01 4.705882370471954346e-01 1.615248413085937500e+02
7.400000000000000000e+01 6.878230769230766555e+02 2.456782226562500000e+02 -2.958648681640625000e+00 2.529783844947814941e-01 4.705882370471954346e-01 2.196560974121093750e+02
1.300000000000000000e+01 6.946538461538458478e+02 2.519754791259765625e+02 -2.529235839843750000e+00 9.999999776482582092e-03 1.764705926179885864e-01 2.725475692749023438e+01
8.000000000000000000e+00 8.271384615384608878e+02 3.534625244140625000e+02 -8.828735351562500000e-02 0.000000000000000000e+00 0.000000000000000000e+00 9.166381835937500000e+01
1.200000000000000000e+01 8.229307692307692150e+02 3.768185729980468750e+02 -8.843994140625000000e-01 9.999999776482582092e-03 0.000000000000000000e+00 5.485134277343750000e+02
5.000000000000000000e+00 8.538999999999997499e+02 3.948837890625000000e+02 -1.680511474609375000e+00 1.791147440671920776e-01 0.000000000000000000e+00 1.006898620605468750e+03
2.200000000000000000e+01 8.480769230769229807e+02 3.988499755859375000e+02 -1.959350585937500000e+00 1.897220611572265625e-01 0.000000000000000000e+00 1.078932983398437500e+03
7.000000000000000000e+00 8.663692307692307395e+02 4.046267700195312500e+02 -1.720947265625000000e+00 1.388808190822601318e-01 0.000000000000000000e+00 9.653892211914062500e+02
2.100000000000000000e+01 9.403692307692307395e+02 4.098562011718750000e+02 -1.482574462890625000e+00 9.999999776482582092e-03 0.000000000000000000e+00 5.911047363281250000e+02
8.000000000000000000e+00 9.494076923076924004e+02 4.114858398437500000e+02 -1.244171142578125000e+00 9.999999776482582092e-03 0.000000000000000000e+00 4.042597351074218750e+02
6.000000000000000000e+01 1.824230769230769056e+03 4.101216125488281250e+02 8.202392578125000000e+00 0.000000000000000000e+00 0.000000000000000000e+00 3.703970336914062500e+02
2.400000000000000000e+01 2.663823076923077679e+03 4.213275756835937500e+02 2.552368164062500000e+00 0.000000000000000000e+00 0.000000000000000000e+00 7.572944335937500000e+02
5.900000000000000000e+01 2.348869230769230853e+03 4.589800109863281250e+02 1.823028564453125000e+00 0.000000000000000000e+00 0.000000000000000000e+00 3.757812805175781250e+02
6.300000000000000000e+01 1.914569230769230899e+03 4.808865051269531250e+02 1.093658447265625000e+00 0.000000000000000000e+00 0.000000000000000000e+00 8.666544189453125000e+02
1.100000000000000000e+01 1.601423076923075996e+03 4.342665100097656250e+02 3.643188476562500000e-01 1.828354895114898682e-01 0.000000000000000000e+00 1.399519775390625000e+03
1.000000000000000000e+00 1.271876923076922822e+03 3.391109008789062500e+02 -1.385192871093750000e-01 9.999999776482582092e-03 5.882353186607360840e-01 1.674663330078125000e+03
3.800000000000000000e+01 8.744384615384614108e+02 2.439283142089843750e+02 -4.147949218750000000e-01 0.000000000000000000e+00 5.294117927551269531e-01 9.131380615234375000e+02
5.400000000000000000e+01 4.703153846153846871e+02 1.299143676757812500e+02 -9.673767089843750000e-01 0.000000000000000000e+00 0.000000000000000000e+00 8.970708618164062500e+02
2.600000000000000000e+01 4.934153846153845961e+02 1.471049499511718750e+02 -1.137817382812500000e+00 9.999999776482582092e-03 1.058823585510253906e+00 8.614681396484375000e+02
3.000000000000000000e+01 5.066307692307691468e+02 1.959156036376953125e+02 -1.273010253906250000e+00 0.000000000000000000e+00 7.647058963775634766e-01 7.740490722656250000e+02
6.200000000000000000e+01 5.126615384615386120e+02 2.208568725585937500e+02 -1.408172607421875000e+00 9.999999776482582092e-03 5.882353186607360840e-01 1.295022827148437500e+03
5.800000000000000000e+01 5.215153846153847326e+02 2.426937255859375000e+02 -1.543334960937500000e+00 0.000000000000000000e+00 2.352941185235977173e-01 9.287236328125000000e+02
4.200000000000000000e+01 5.644153846153848235e+02 2.607780456542968750e+02 -1.577453613281250000e+00 0.000000000000000000e+00 2.352941185235977173e-01 8.375258178710937500e+02
2.300000000000000000e+01 6.213923076923076678e+02 2.698572998046875000e+02 -1.611572265625000000e+00 0.000000000000000000e+00 0.000000000000000000e+00 7.303138427734375000e+02
6.100000000000000000e+01 8.028076923076916955e+02 2.600949707031250000e+02 -1.645690917968750000e+00 0.000000000000000000e+00 4.705882370471954346e-01 8.211953735351562500e+02
6.500000000000000000e+01 8.893769230769232763e+02 2.584371643066406250e+02 -1.680999755859375000e+00 0.000000000000000000e+00 0.000000000000000000e+00 8.286653442382812500e+02
7.300000000000000000e+01 9.014692307692311033e+02 2.471287841796875000e+02 -1.719970703125000000e+00 9.999999776482582092e-03 2.352941185235977173e-01 1.031271118164062500e+03
9.000000000000000000e+00 8.423000000000000682e+02 2.282834472656250000e+02 -1.758941650390625000e+00 9.999999776482582092e-03 1.176470592617988586e-01 1.598962402343750000e+03
1.800000000000000000e+01 7.932307692307693969e+02 1.860458374023437500e+02 -1.805419921875000000e+00 1.695750355720520020e-01 2.941176593303680420e-01 1.835687866210937500e+03
4.000000000000000000e+01 6.901461538461537657e+02 1.812132873535156250e+02 -1.781463623046875000e+00 3.567108809947967529e-01 2.352941185235977173e-01 1.625506713867187500e+03
6.000000000000000000e+01 6.657384615384614790e+02 1.758450164794921875e+02 -1.757476806640625000e+00 9.999999776482582092e-03 0.000000000000000000e+00 1.675348510742187500e+03
6.300000000000000000e+01 5.935923076923073722e+02 1.728691406250000000e+02 -1.733520507812500000e+00 9.999999776482582092e-03 0.000000000000000000e+00 1.355512939453125000e+03
5.600000000000000000e+01 5.669384615384619792e+02 1.843419494628906250e+02 -1.581756591796875000e+00 0.000000000000000000e+00 0.000000000000000000e+00 1.256316650390625000e+03
5.800000000000000000e+01 5.678692307692307395e+02 1.921485443115234375e+02 -1.387359619140625000e+00 0.000000000000000000e+00 2.941176593303680420e-01 1.126429321289062500e+03
4.800000000000000000e+01 5.934615384615385665e+02 2.041199798583984375e+02 -1.192993164062500000e+00 0.000000000000000000e+00 0.000000000000000000e+00 1.049976806640625000e+03
2.500000000000000000e+01 5.553538461538463480e+02 1.924319763183593750e+02 -7.981567382812500000e-01 0.000000000000000000e+00 0.000000000000000000e+00 8.404988403320312500e+02
5.700000000000000000e+01 5.440923076923077133e+02 1.746067199707031250e+02 -5.976867675781250000e-01 0.000000000000000000e+00 0.000000000000000000e+00 8.188818969726562500e+02
4.100000000000000000e+01 4.334846153846153811e+02 1.423942871093750000e+02 1.478881835937500000e-01 0.000000000000000000e+00 6.470588445663452148e-01 6.728245849609375000e+02
4.300000000000000000e+01 4.170000000000003979e+02 1.497144165039062500e+02 -4.782104492187500000e-02 0.000000000000000000e+00 0.000000000000000000e+00 6.678251342773437500e+02
5.900000000000000000e+01 4.152538461538458705e+02 1.479736022949218750e+02 -2.435302734375000000e-01 0.000000000000000000e+00 7.647058963775634766e-01 6.747014770507812500e+02
4.200000000000000000e+01 4.213384615384617291e+02 1.490195617675781250e+02 -5.357666015625000000e-01 0.000000000000000000e+00 0.000000000000000000e+00 6.623675537109375000e+02
6.100000000000000000e+01 4.369846153846153243e+02 1.702033996582031250e+02 -1.120178222656250000e+00 0.000000000000000000e+00 5.882353186607360840e-01 5.408051757812500000e+02
5.600000000000000000e+01 4.576153846153846985e+02 2.399250793457031250e+02 -1.540863037109375000e+00 0.000000000000000000e+00 0.000000000000000000e+00 6.082765502929687500e+02
3.600000000000000000e+01 4.554307692307692150e+02 2.504208221435546875e+02 -1.702087402343750000e+00 0.000000000000000000e+00 0.000000000000000000e+00 5.193034057617187500e+02
3.400000000000000000e+01 4.723692307692305121e+02 1.775839385986328125e+02 -1.933349609375000000e+00 0.000000000000000000e+00 2.352941185235977173e-01 4.790211486816406250e+02
4.000000000000000000e+01 4.828923076923081226e+02 1.312511901855468750e+02 -1.912231445312500000e+00 0.000000000000000000e+00 0.000000000000000000e+00 4.221292724609375000e+02
5.100000000000000000e+01 4.747999999999998408e+02 1.109186019897460938e+02 -1.891143798828125000e+00 0.000000000000000000e+00 0.000000000000000000e+00 3.505427856445312500e+02
3.600000000000000000e+01 4.779999999999999432e+02 1.237672500610351562e+02 -1.870025634765625000e+00 0.000000000000000000e+00 2.941176593303680420e-01 3.029854736328125000e+02
3.100000000000000000e+01 4.710000000000003979e+02 1.552850952148437500e+02 -1.805938720703125000e+00 0.000000000000000000e+00 0.000000000000000000e+00 2.669806213378906250e+02
4.800000000000000000e+01 4.672076923076922981e+02 1.840603485107421875e+02 -1.727508544921875000e+00 0.000000000000000000e+00 0.000000000000000000e+00 2.645202636718750000e+02
3.500000000000000000e+01 4.654769230769232990e+02 1.876446075439453125e+02 -1.649078369140625000e+00 0.000000000000000000e+00 5.882353186607360840e-01 2.642249450683593750e+02
2.500000000000000000e+01 4.639692307692305917e+02 1.819719696044921875e+02 -1.570648193359375000e+00 0.000000000000000000e+00 5.882353186607360840e-01 2.642946777343750000e+02
6.300000000000000000e+01 4.739076923076923435e+02 1.789422149658203125e+02 -1.584381103515625000e+00 0.000000000000000000e+00 2.352941185235977173e-01 2.580980224609375000e+02
5.900000000000000000e+01 4.945461538461536861e+02 1.735662689208984375e+02 -1.663238525390625000e+00 9.999999776482582092e-03 5.882353186607360840e-01 2.573782958984375000e+02
2.100000000000000000e+01 5.348076923076922640e+02 2.060390167236328125e+02 -2.156280517578125000e+00 9.999999776482582092e-03 0.000000000000000000e+00 2.206742248535156250e+02
3.800000000000000000e+01 5.771538461538463025e+02 1.107390975952148438e+02 -2.579620361328125000e+00 9.999999776482582092e-03 0.000000000000000000e+00 2.479501190185546875e+02
3.900000000000000000e+01 5.916692307692309214e+02 1.524344177246093750e+02 -2.807067871093750000e+00 9.999999776482582092e-03 2.352941185235977173e-01 2.593195190429687500e+02
4.000000000000000000e+01 6.075846153846151765e+02 2.153424072265625000e+02 -3.034515380859375000e+00 9.999999776482582092e-03 7.647058963775634766e-01 2.621351318359375000e+02
4.500000000000000000e+01 6.209384615384614108e+02 2.701425476074218750e+02 -3.178924560546875000e+00 1.096363291144371033e-01 8.235294222831726074e-01 2.690286254882812500e+02
3.200000000000000000e+01 6.502923076923078725e+02 2.976902465820312500e+02 -3.529205322265625000e+00 1.361309885978698730e-01 8.823529481887817383e-01 2.362146606445312500e+02
3.000000000000000000e+01 6.635692307692310123e+02 2.951946105957031250e+02 -3.566925048828125000e+00 1.498841643333435059e-01 1.058823585510253906e+00 2.604637451171875000e+02
4.000000000000000000e+01 6.727000000000005002e+02 2.798697814941406250e+02 -3.604675292968750000e+00 1.644881367683410645e-01 5.294117927551269531e-01 2.696977539062500000e+02
4.800000000000000000e+01 6.800076923076923094e+02 2.499835205078125000e+02 -3.642395019531250000e+00 1.684614568948745728e-01 2.352941185235977173e-01 2.481059875488281250e+02
4.200000000000000000e+01 6.903230769230766555e+02 1.750825347900390625e+02 -3.741516113281250000e+00 2.104342579841613770e-01 5.294117927551269531e-01 2.624577636718750000e+02
4.800000000000000000e+01 6.881307692307690331e+02 1.652078552246093750e+02 -3.798156738281250000e+00 2.142007946968078613e-01 2.941176593303680420e-01 2.308982391357421875e+02
4.700000000000000000e+01 6.616615384615384983e+02 1.173631896972656250e+02 -4.051544189453125000e+00 2.194759547710418701e-01 0.000000000000000000e+00 2.083670043945312500e+02
4.200000000000000000e+01 6.673846153846153584e+02 1.077443084716796875e+02 -4.163848876953125000e+00 2.458620965480804443e-01 1.764705926179885864e-01 2.018535614013671875e+02
7.000000000000000000e+00 6.450000000000000000e+02 8.867755126953125000e+01 -4.360290527343750000e+00 2.404844611883163452e-01 0.000000000000000000e+00 1.504816436767578125e+02
3.100000000000000000e+01 6.361230769230767237e+02 7.313393402099609375e+01 -4.435089111328125000e+00 2.369225025177001953e-01 0.000000000000000000e+00 1.313624725341796875e+02
3.100000000000000000e+01 6.309461538461539476e+02 6.424116516113281250e+01 -4.509857177734375000e+00 2.523824572563171387e-01 0.000000000000000000e+00 1.261088714599609375e+02
2.000000000000000000e+01 6.197692307692303757e+02 7.902323150634765625e+01 -4.584655761718750000e+00 2.731825113296508789e-01 0.000000000000000000e+00 1.251497039794921875e+02
1.500000000000000000e+01 6.043307692307691923e+02 9.233726501464843750e+01 -4.475128173828125000e+00 2.884766161441802979e-01 0.000000000000000000e+00 1.005793380737304688e+02
1.900000000000000000e+01 5.945769230769232081e+02 9.800240325927734375e+01 -4.420379638671875000e+00 2.945746779441833496e-01 8.823529481887817383e-01 9.806320190429687500e+01
1.600000000000000000e+01 5.822769230769227988e+02 1.049409561157226562e+02 -4.339355468750000000e+00 2.934165596961975098e-01 0.000000000000000000e+00 9.957243347167968750e+01
1.500000000000000000e+01 5.720076923076920821e+02 1.083782806396484375e+02 -4.179534912109375000e+00 2.925117015838623047e-01 0.000000000000000000e+00 9.218434143066406250e+01
1.600000000000000000e+01 5.609769230769230717e+02 1.214552307128906250e+02 -4.019683837890625000e+00 2.934691011905670166e-01 2.941176593303680420e-01 7.235140991210937500e+01
1.400000000000000000e+01 5.436538461538464162e+02 1.480791320800781250e+02 -3.859832763671875000e+00 2.707082033157348633e-01 0.000000000000000000e+00 4.363236618041992188e+01
2.600000000000000000e+01 5.331076923076921048e+02 1.839203948974609375e+02 -3.922515869140625000e+00 2.517426013946533203e-01 0.000000000000000000e+00 1.033906841278076172e+01
1.900000000000000000e+01 6.405307692307692378e+02 3.180550231933593750e+02 -3.493652343750000000e+00 2.534312307834625244e-01 5.882353186607360840e-01 4.217323303222656250e+01
1.700000000000000000e+01 6.634384615384612971e+02 3.183211059570312500e+02 -3.718536376953125000e+00 2.850493788719177246e-01 2.941176593303680420e-01 6.589205932617187500e+01
3.400000000000000000e+01 7.253153846153844597e+02 3.222207641601562500e+02 -4.610809326171875000e+00 3.194294273853302002e-01 0.000000000000000000e+00 1.874211120605468750e+02
2.800000000000000000e+01 7.668230769230768828e+02 2.048898925781250000e+02 -5.357543945312500000e+00 3.698874115943908691e-01 0.000000000000000000e+00 3.180356445312500000e+02
1.800000000000000000e+01 7.861692307692308077e+02 2.059439239501953125e+02 -5.427429199218750000e+00 4.475109279155731201e-01 0.000000000000000000e+00 4.024974365234375000e+02
2.800000000000000000e+01 8.552076923076929234e+02 2.351829528808593750e+02 -5.315704345703125000e+00 5.088587999343872070e-01 2.941176593303680420e-01 5.450089721679687500e+02
1.300000000000000000e+01 8.607076923076926960e+02 3.750227966308593750e+02 -5.329864501953125000e+00 4.548865258693695068e-01 6.470588445663452148e-01 5.663750000000000000e+02
2.600000000000000000e+01 8.684923076923078042e+02 4.076548767089843750e+02 -5.470123291015625000e+00 4.419907033443450928e-01 0.000000000000000000e+00 5.555601806640625000e+02
3.800000000000000000e+01 9.386461538461537657e+02 4.073399658203125000e+02 -5.578094482421875000e+00 5.513480305671691895e-01 0.000000000000000000e+00 5.872821044921875000e+02
2.000000000000000000e+01 8.689153846153848235e+02 4.094608764648437500e+02 -5.786041259765625000e+00 5.241319537162780762e-01 0.000000000000000000e+00 6.256788940429687500e+02
3.200000000000000000e+01 8.679230769230766782e+02 4.086570739746093750e+02 -5.878051757812500000e+00 4.742039442062377930e-01 0.000000000000000000e+00 6.301507568359375000e+02
2.200000000000000000e+01 8.459769230769231854e+02 4.024309997558593750e+02 -5.970092773437500000e+00 4.197277128696441650e-01 0.000000000000000000e+00 5.054393005371093750e+02
2.900000000000000000e+01 8.335076923076921958e+02 3.816205749511718750e+02 -6.062103271484375000e+00 4.238702952861785889e-01 0.000000000000000000e+00 4.933794250488281250e+02
2.300000000000000000e+01 9.020999999999999091e+02 2.908451843261718750e+02 -5.888885498046875000e+00 4.331018328666687012e-01 5.294117927551269531e-01 5.188482055664062500e+02
2.200000000000000000e+01 9.217999999999997272e+02 2.856461181640625000e+02 -5.817535400390625000e+00 4.128655791282653809e-01 0.000000000000000000e+00 5.058855590820312500e+02
3.000000000000000000e+01 9.246307692307697153e+02 2.962785949707031250e+02 -5.511138916015625000e+00 4.103499650955200195e-01 0.000000000000000000e+00 5.106763610839843750e+02
1.400000000000000000e+01 9.647692307692304894e+02 3.578556518554687500e+02 -4.898376464843750000e+00 4.993884861469268799e-01 0.000000000000000000e+00 6.184483642578125000e+02
3.500000000000000000e+01 9.473230769230768828e+02 4.204211425781250000e+02 -4.098724365234375000e+00 2.293546348810195923e-01 3.529411852359771729e-01 3.412601013183593750e+02
6.700000000000000000e+01 9.537692307692304894e+02 4.337470092773437500e+02 -3.642822265625000000e+00 9.999999776482582092e-03 1.176470592617988586e-01 7.714456939697265625e+01
6.100000000000000000e+01 9.479307692307694424e+02 4.390941162109375000e+02 -3.186920166015625000e+00 9.999999776482582092e-03 1.176470592617988586e-01 2.480300750732421875e+02
1.100000000000000000e+01 1.084892307692307895e+03 4.679607543945312500e+02 -1.858245849609375000e+00 2.107421159744262695e-01 0.000000000000000000e+00 6.472888183593750000e+02
2.000000000000000000e+01 1.105261538461539203e+03 4.826586303710937500e+02 -1.417938232421875000e+00 1.438199579715728760e-01 0.000000000000000000e+00 3.362295837402343750e+02
5.600000000000000000e+01 1.105769230769230717e+03 4.914147338867187500e+02 -1.081817626953125000e+00 9.999999776482582092e-03 0.000000000000000000e+00 2.019593811035156250e+02
2.100000000000000000e+01 1.092430769230768647e+03 4.937920532226562500e+02 -7.804260253906250000e-01 9.999999776482582092e-03 0.000000000000000000e+00 5.499170684814453125e+01
4.500000000000000000e+01 1.305369230769230626e+03 4.651084289550781250e+02 1.025476074218750000e+01 0.000000000000000000e+00 0.000000000000000000e+00 2.634228134155273438e+01
3.100000000000000000e+01 1.187923076923076678e+03 4.673040466308593750e+02 9.920715332031250000e+00 0.000000000000000000e+00 0.000000000000000000e+00 8.864769744873046875e+01
1.600000000000000000e+01 1.081392307692307895e+03 4.523768920898437500e+02 9.586669921875000000e+00 0.000000000000000000e+00 0.000000000000000000e+00 7.935924530029296875e+01
2.800000000000000000e+01 1.056684615384615427e+03 3.958039245605468750e+02 9.252624511718750000e+00 0.000000000000000000e+00 5.882352963089942932e-02 7.008406829833984375e+01
3.300000000000000000e+01 9.484769230769229580e+02 3.786429443359375000e+02 9.133209228515625000e+00 0.000000000000000000e+00 0.000000000000000000e+00 1.112119064331054688e+02
1.500000000000000000e+01 9.061230769230771784e+02 3.735989379882812500e+02 9.228424072265625000e+00 0.000000000000000000e+00 0.000000000000000000e+00 6.125280761718750000e+01
4.500000000000000000e+01 1.315246153846153447e+03 3.751925659179687500e+02 8.632263183593750000e+00 0.000000000000000000e+00 0.000000000000000000e+00 2.822624511718750000e+02
9.000000000000000000e+00 8.440461538461538566e+02 3.375936889648437500e+02 8.070953369140625000e+00 0.000000000000000000e+00 0.000000000000000000e+00 4.779125213623046875e+00
1.000000000000000000e+01 8.127076923076926960e+02 3.504179992675781250e+02 7.900909423828125000e+00 0.000000000000000000e+00 0.000000000000000000e+00 8.244142532348632812e+00
2.000000000000000000e+00 7.134000000000002046e+02 3.115652160644531250e+02 7.371948242187500000e+00 0.000000000000000000e+00 0.000000000000000000e+00 4.474894046783447266e+00
5.000000000000000000e+01 7.166384615384613426e+02 2.588413391113281250e+02 7.279052734375000000e+00 0.000000000000000000e+00 0.000000000000000000e+00 5.451557540893554688e+01
7.000000000000000000e+00 7.050923076923079407e+02 2.582096557617187500e+02 7.246612548828125000e+00 0.000000000000000000e+00 6.470588445663452148e-01 9.517235565185546875e+01
5.100000000000000000e+01 6.734153846153848235e+02 2.856155395507812500e+02 7.222045898437500000e+00 0.000000000000000000e+00 0.000000000000000000e+00 2.210347442626953125e+02
1.500000000000000000e+01 6.526076923076924459e+02 2.885855407714843750e+02 4.650177001953125000e+00 0.000000000000000000e+00 2.352941185235977173e-01 1.592752380371093750e+02
4.600000000000000000e+01 6.748692307692310806e+02 3.142897644042968750e+02 4.353973388671875000e+00 0.000000000000000000e+00 0.000000000000000000e+00 2.106660156250000000e+02
4.700000000000000000e+01 6.750846153846154039e+02 3.211710205078125000e+02 4.205841064453125000e+00 0.000000000000000000e+00 0.000000000000000000e+00 1.980012817382812500e+02
5.400000000000000000e+01 6.649000000000000909e+02 3.286776733398437500e+02 4.072631835937500000e+00 0.000000000000000000e+00 3.529411852359771729e-01 1.886023712158203125e+02
2.700000000000000000e+01 6.699923076923076906e+02 3.276805419921875000e+02 3.940368652343750000e+00 0.000000000000000000e+00 5.294117927551269531e-01 1.696168060302734375e+02
5.700000000000000000e+01 6.720923076923075996e+02 3.057052307128906250e+02 3.814880371093750000e+00 0.000000000000000000e+00 7.058823704719543457e-01 1.895676116943359375e+02
4.000000000000000000e+00 6.286846153846155403e+02 3.040067138671875000e+02 3.445770263671875000e+00 0.000000000000000000e+00 1.647058844566345215e+00 1.975856323242187500e+02
5.300000000000000000e+01 6.613461538461536975e+02 3.071921997070312500e+02 3.335754394531250000e+00 0.000000000000000000e+00 5.882353186607360840e-01 1.905593872070312500e+02
1.400000000000000000e+01 6.724230769230766782e+02 2.920405883789062500e+02 3.192565917968750000e+00 0.000000000000000000e+00 1.058823585510253906e+00 2.036539764404296875e+02
2.000000000000000000e+01 6.798615384615380890e+02 2.654488525390625000e+02 3.242584228515625000e+00 0.000000000000000000e+00 2.941176593303680420e-01 2.449007568359375000e+02
1.600000000000000000e+01 6.444153846153845961e+02 2.587849121093750000e+02 3.324371337890625000e+00 0.000000000000000000e+00 4.705882370471954346e-01 2.015514678955078125e+02
3.600000000000000000e+01 6.109076923076925141e+02 2.449294738769531250e+02 3.174682617187500000e+00 0.000000000000000000e+00 8.235294222831726074e-01 1.534916839599609375e+02
5.000000000000000000e+00 6.130923076923077133e+02 2.447551574707031250e+02 3.035156250000000000e+00 0.000000000000000000e+00 2.705882310867309570e+00 1.346581268310546875e+02
2.800000000000000000e+01 6.136000000000001364e+02 2.375145874023437500e+02 2.895660400390625000e+00 0.000000000000000000e+00 1.294117689132690430e+00 1.491205139160156250e+02
5.000000000000000000e+01 6.135230769230767010e+02 2.282498016357421875e+02 2.756134033203125000e+00 0.000000000000000000e+00 8.235294222831726074e-01 1.219635314941406250e+02
4.200000000000000000e+01 5.828230769230768828e+02 1.999833221435546875e+02 2.377075195312500000e+00 0.000000000000000000e+00 1.058823585510253906e+00 1.956409606933593750e+02
7.000000000000000000e+00 5.485846153846151765e+02 1.782580108642578125e+02 2.266479492187500000e+00 0.000000000000000000e+00 2.000000000000000000e+00 1.582119598388671875e+02
1.400000000000000000e+01 5.207769230769231399e+02 1.768271331787109375e+02 2.332672119140625000e+00 0.000000000000000000e+00 1.764705896377563477e+00 1.795870971679687500e+02
1.200000000000000000e+01 5.013461538461537543e+02 1.676870269775390625e+02 2.492340087890625000e+00 0.000000000000000000e+00 3.117647171020507812e+00 1.429411926269531250e+02
1.100000000000000000e+01 5.189615384615387939e+02 1.598147125244140625e+02 2.531951904296875000e+00 0.000000000000000000e+00 1.941176414489746094e+00 6.129279708862304688e+01
3.000000000000000000e+00 5.478230769230769965e+02 1.544725799560546875e+02 2.569732666015625000e+00 0.000000000000000000e+00 2.882352828979492188e+00 1.464378204345703125e+02
8.000000000000000000e+00 5.544307692307689877e+02 1.533741302490234375e+02 1.348876953125000000e+00 0.000000000000000000e+00 0.000000000000000000e+00 3.506892089843750000e+02
3.000000000000000000e+00 5.516230769230771784e+02 1.973357391357421875e+02 8.821411132812500000e-01 0.000000000000000000e+00 1.588235259056091309e+00 1.878253326416015625e+02
4.000000000000000000e+00 5.223230769230772239e+02 2.124439239501953125e+02 4.124145507812500000e-01 0.000000000000000000e+00 5.294117927551269531e-01 2.200720672607421875e+02
5.900000000000000000e+01 5.033384615384617859e+02 2.093351440429687500e+02 3.410034179687500000e-01 0.000000000000000000e+00 0.000000000000000000e+00 1.873532104492187500e+02
5.400000000000000000e+01 5.058692307692307395e+02 1.949649200439453125e+02 2.696228027343750000e-01 0.000000000000000000e+00 0.000000000000000000e+00 4.551225280761718750e+02
6.400000000000000000e+01 5.023538461538463480e+02 1.762723846435546875e+02 1.982116699218750000e-01 0.000000000000000000e+00 0.000000000000000000e+00 5.725483398437500000e+02
4.000000000000000000e+01 5.099461538461538339e+02 1.546546020507812500e+02 1.613159179687500000e-01 9.999999776482582092e-03 0.000000000000000000e+00 9.241929321289062500e+02
2.300000000000000000e+01 4.921307692307692605e+02 1.393606719970703125e+02 2.279663085937500000e-01 0.000000000000000000e+00 0.000000000000000000e+00 6.018411865234375000e+02
1.700000000000000000e+01 4.799538461538462002e+02 1.362243499755859375e+02 2.946472167968750000e-01 0.000000000000000000e+00 0.000000000000000000e+00 5.306268920898437500e+02
1.200000000000000000e+01 4.560307692307693515e+02 1.586338653564453125e+02 4.673156738281250000e-01 0.000000000000000000e+00 1.058823585510253906e+00 3.531076354980468750e+02
1.000000000000000000e+00 3.952615384615382936e+02 1.574591217041015625e+02 9.034423828125000000e-01 0.000000000000000000e+00 1.294117689132690430e+00 2.112865295410156250e+02
1.000000000000000000e+00 3.659153846153845393e+02 1.074289855957031250e+02 1.240234375000000000e+00 0.000000000000000000e+00 1.823529362678527832e+00 9.714221954345703125e+01
1.000000000000000000e+00 3.456692307692306940e+02 1.268778610229492188e+02 9.880065917968750000e-01 0.000000000000000000e+00 2.588235378265380859e+00 1.593827056884765625e+02
0.000000000000000000e+00 3.289692307692307054e+02 1.370759277343750000e+02 5.323181152343750000e-01 0.000000000000000000e+00 1.588235259056091309e+00 1.256059112548828125e+02
3.000000000000000000e+00 3.402307692307691696e+02 1.356739349365234375e+02 9.436340332031250000e-01 0.000000000000000000e+00 1.941176414489746094e+00 9.701821899414062500e+01
2.000000000000000000e+00 3.359923076923075200e+02 1.289824523925781250e+02 7.944641113281250000e-01 0.000000000000000000e+00 2.058823585510253906e+00 9.503120422363281250e+01
5.300000000000000000e+01 5.554846153846152674e+02 2.062239990234375000e+02 -1.862487792968750000e-01 0.000000000000000000e+00 7.647058963775634766e-01 2.856045532226562500e+02
5.600000000000000000e+01 5.674153846153847098e+02 2.011385498046875000e+02 -1.514282226562500000e-01 0.000000000000000000e+00 2.352941185235977173e-01 3.615437927246093750e+02
3.700000000000000000e+01 5.652307692307688285e+02 2.073620300292968750e+02 -1.165771484375000000e-01 0.000000000000000000e+00 3.529411852359771729e-01 3.629120788574218750e+02
2.100000000000000000e+01 5.660461538461537430e+02 2.163644409179687500e+02 -8.172607421875000000e-02 0.000000000000000000e+00 2.647058725357055664e+00 2.714136962890625000e+02
6.300000000000000000e+01 5.532692307692307168e+02 2.518804931640625000e+02 -3.449096679687500000e-01 0.000000000000000000e+00 4.117647111415863037e-01 2.993221740722656250e+02
5.800000000000000000e+01 5.470615384615385892e+02 2.874168701171875000e+02 -4.765014648437500000e-01 0.000000000000000000e+00 0.000000000000000000e+00 2.942500915527343750e+02
4.100000000000000000e+01 5.897692307692307168e+02 3.162957458496093750e+02 -6.247253417968750000e-01 1.071608662605285645e-01 0.000000000000000000e+00 9.270230102539062500e+02
5.700000000000000000e+01 5.829692307692309896e+02 3.393075256347656250e+02 -8.227844238281250000e-01 9.999999776482582092e-03 0.000000000000000000e+00 7.539080200195312500e+02
7.000000000000000000e+01 5.830076923076926505e+02 3.247701110839843750e+02 -1.020874023437500000e+00 1.698482632637023926e-01 0.000000000000000000e+00 9.796055908203125000e+02
1.200000000000000000e+01 5.435615384615385892e+02 2.082115936279296875e+02 -1.218933105468750000e+00 1.485850960016250610e-01 5.882352963089942932e-02 7.452927856445312500e+02
2.400000000000000000e+01 5.224538461538461434e+02 1.427683105468750000e+02 -1.432250976562500000e+00 9.999999776482582092e-03 1.352941155433654785e+00 6.904574584960937500e+02
3.900000000000000000e+01 6.137384615384615927e+02 2.098912506103515625e+02 -2.643035888671875000e+00 0.000000000000000000e+00 4.117647111415863037e-01 4.358457946777343750e+02
5.300000000000000000e+01 6.690384615384609788e+02 2.422315979003906250e+02 -2.910400390625000000e+00 9.999999776482582092e-03 0.000000000000000000e+00 4.790243530273437500e+02
3.200000000000000000e+01 7.081538461538461888e+02 2.746647338867187500e+02 -3.177764892578125000e+00 9.999999776482582092e-03 1.176470592617988586e-01 5.910552368164062500e+02
4.100000000000000000e+01 6.901230769230768374e+02 2.988031921386718750e+02 -3.496978759765625000e+00 1.647834628820419312e-01 0.000000000000000000e+00 9.209174194335937500e+02
1.600000000000000000e+01 6.961538461538461888e+02 3.100418701171875000e+02 -3.816192626953125000e+00 5.718587040901184082e-01 0.000000000000000000e+00 1.160049438476562500e+03
1.000000000000000000e+00 6.671999999999997044e+02 2.886997375488281250e+02 -4.135437011718750000e+00 6.360525488853454590e-01 0.000000000000000000e+00 1.419309570312500000e+03
7.000000000000000000e+00 6.512461538461536747e+02 2.506231079101562500e+02 -4.434112548828125000e+00 6.154615879058837891e-01 0.000000000000000000e+00 1.486572387695312500e+03
3.100000000000000000e+01 6.134999999999998863e+02 2.094488983154296875e+02 -4.908416748046875000e+00 6.810216307640075684e-01 0.000000000000000000e+00 1.529102294921875000e+03
4.800000000000000000e+01 5.700230769230768146e+02 2.099905853271484375e+02 -5.145568847656250000e+00 7.149774432182312012e-01 0.000000000000000000e+00 1.459323852539062500e+03
2.900000000000000000e+01 5.254307692307692150e+02 2.191844635009765625e+02 -5.275756835937500000e+00 3.292372524738311768e-01 5.882353186607360840e-01 1.055000000000000000e+03
5.700000000000000000e+01 5.097461538461536747e+02 2.340891265869140625e+02 -5.299041748046875000e+00 3.972308039665222168e-01 4.117647111415863037e-01 1.044003173828125000e+03
5.800000000000000000e+01 4.814615384615386802e+02 2.441864929199218750e+02 -5.322326660156250000e+00 2.533925175666809082e-01 2.941176593303680420e-01 7.687080688476562500e+02
5.600000000000000000e+01 4.421384615384613994e+02 2.386392974853515625e+02 -5.345611572265625000e+00 2.322043031454086304e-01 0.000000000000000000e+00 9.810388183593750000e+02
2.300000000000000000e+01 4.129384615384615245e+02 2.020088806152343750e+02 -4.596679687500000000e+00 9.999999776482582092e-03 2.529411792755126953e+00 4.817406005859375000e+02
4.000000000000000000e+01 4.254384615384616382e+02 1.945705871582031250e+02 -4.322204589843750000e+00 9.999999776482582092e-03 2.235294103622436523e+00 5.212863769531250000e+02
4.000000000000000000e+00 4.386846153846154834e+02 1.885448608398437500e+02 -3.948059082031250000e+00 1.062985807657241821e-01 1.470588207244873047e+00 5.222001953125000000e+02
5.400000000000000000e+01 4.554846153846153243e+02 1.834037322998046875e+02 -3.573913574218750000e+00 1.263462901115417480e-01 4.705882370471954346e-01 5.184484863281250000e+02
5.000000000000000000e+01 4.834307692307694424e+02 1.770422210693359375e+02 -3.199768066406250000e+00 2.232119739055633545e-01 5.882353186607360840e-01 6.693632202148437500e+02
4.100000000000000000e+01 4.867692307692304894e+02 1.738186645507812500e+02 -2.905212402343750000e+00 1.392260640859603882e-01 5.882353186607360840e-01 5.543749389648437500e+02
6.000000000000000000e+01 4.970307692307694651e+02 1.646962127685546875e+02 -2.849395751953125000e+00 1.397561877965927124e-01 7.058823704719543457e-01 5.852440795898437500e+02
6.000000000000000000e+01 5.135000000000002274e+02 1.611544494628906250e+02 -2.793579101562500000e+00 2.415090650320053101e-01 0.000000000000000000e+00 7.516064453125000000e+02
6.500000000000000000e+01 4.765307692307691241e+02 1.585690612792968750e+02 -2.737792968750000000e+00 3.664872348308563232e-01 0.000000000000000000e+00 7.993223266601562500e+02
7.100000000000000000e+01 4.447615384615384073e+02 1.584838256835937500e+02 -2.876312255859375000e+00 4.593592584133148193e-01 7.647058963775634766e-01 9.085322875976562500e+02
2.500000000000000000e+01 4.259769230769230148e+02 1.586289672851562500e+02 -3.209167480468750000e+00 5.135143995285034180e-01 8.235294222831726074e-01 9.757767333984375000e+02
2.000000000000000000e+01 4.202923076923077019e+02 1.569117126464843750e+02 -3.542022705078125000e+00 3.553134202957153320e-01 8.235294222831726074e-01 7.819042968750000000e+02
2.300000000000000000e+01 4.092538461538460979e+02 1.503437652587890625e+02 -3.874877929687500000e+00 4.687126576900482178e-01 8.235294222831726074e-01 8.371087646484375000e+02
1.400000000000000000e+01 3.951923076923078497e+02 1.415457000732421875e+02 -4.592987060546875000e+00 4.821557104587554932e-01 0.000000000000000000e+00 8.643413085937500000e+02
4.800000000000000000e+01 4.021692307692308077e+02 1.372801055908203125e+02 -5.439453125000000000e+00 5.360434055328369141e-01 5.882352963089942932e-02 9.875623168945312500e+02
3.200000000000000000e+01 3.984846153846154948e+02 1.376651611328125000e+02 -6.285949707031250000e+00 8.083541393280029297e-01 2.941176593303680420e-01 1.312259033203125000e+03
3.800000000000000000e+01 4.319153846153845961e+02 1.710727081298828125e+02 -8.424133300781250000e+00 6.159998774528503418e-01 2.352941185235977173e-01 1.246035888671875000e+03
4.400000000000000000e+01 3.961461538461541068e+02 1.540464935302734375e+02 -9.070007324218750000e+00 1.774955540895462036e-01 2.941176593303680420e-01 5.025877075195312500e+02
5.300000000000000000e+01 4.031538461538457909e+02 1.407257385253906250e+02 -9.592376708984375000e+00 3.042049705982208252e-01 7.647058963775634766e-01 6.111013793945312500e+02
6.000000000000000000e+01 4.647615384615384073e+02 1.369536132812500000e+02 -9.744415283203125000e+00 8.614850640296936035e-01 9.411764740943908691e-01 1.498830688476562500e+03
6.000000000000000000e+00 4.632307692307694538e+02 1.391538085937500000e+02 -9.896423339843750000e+00 8.804780840873718262e-01 1.176470637321472168e+00 1.440606689453125000e+03
1.300000000000000000e+01 4.471076923076922753e+02 1.600536651611328125e+02 -1.004843139648437500e+01 8.850022554397583008e-01 1.235294103622436523e+00 1.335871704101562500e+03
1.600000000000000000e+01 4.476384615384619110e+02 1.745711364746093750e+02 -9.948577880859375000e+00 9.379317164421081543e-01 1.235294103622436523e+00 1.443256469726562500e+03
1.500000000000000000e+01 4.156999999999998749e+02 1.817168731689453125e+02 -9.245117187500000000e+00 7.338420152664184570e-01 1.588235259056091309e+00 1.153480224609375000e+03
2.700000000000000000e+01 4.166692307692305235e+02 1.857998199462890625e+02 -8.893371582031250000e+00 4.063034653663635254e-01 1.352941155433654785e+00 8.183071289062500000e+02
3.600000000000000000e+01 4.192538461538459842e+02 1.897742004394531250e+02 -8.609375000000000000e+00 6.803312897682189941e-01 1.529411792755126953e+00 9.770507812500000000e+02
5.300000000000000000e+01 4.320153846153843347e+02 1.724028320312500000e+02 -8.086547851562500000e+00 6.443910002708435059e-01 6.470588445663452148e-01 1.073131835937500000e+03
2.600000000000000000e+01 4.330384615384616041e+02 1.552785034179687500e+02 -7.825103759765625000e+00 5.710755586624145508e-01 5.882352963089942932e-02 9.150210571289062500e+02
9.000000000000000000e+00 4.361692307692310351e+02 1.523427124023437500e+02 -7.778686523437500000e+00 5.180107951164245605e-01 2.352941185235977173e-01 8.776845092773437500e+02
2.100000000000000000e+01 4.394384615384619224e+02 1.684659881591796875e+02 -7.732269287109375000e+00 4.987384974956512451e-01 0.000000000000000000e+00 7.824617309570312500e+02
3.400000000000000000e+01 4.352692307692307168e+02 1.702228546142578125e+02 -7.685852050781250000e+00 8.666081428527832031e-01 3.529411852359771729e-01 1.242510009765625000e+03
1.700000000000000000e+01 4.251692307692306372e+02 1.737752990722656250e+02 -7.651611328125000000e+00 5.803508162498474121e-01 5.882353186607360840e-01 7.992683715820312500e+02
2.500000000000000000e+01 4.278153846153848576e+02 1.774758758544921875e+02 -7.653839111328125000e+00 7.804524898529052734e-01 5.882353186607360840e-01 1.022403625488281250e+03
2.400000000000000000e+01 4.334846153846154948e+02 1.791210021972656250e+02 -7.656066894531250000e+00 7.965600490570068359e-01 5.882352963089942932e-02 1.165538574218750000e+03
4.700000000000000000e+01 4.366769230769232308e+02 1.760000610351562500e+02 -7.658264160156250000e+00 6.570655703544616699e-01 1.352941155433654785e+00 8.519149169921875000e+02
4.100000000000000000e+01 4.475692307692310123e+02 1.800263519287109375e+02 -7.610565185546875000e+00 7.557631731033325195e-01 7.058823704719543457e-01 9.281945800781250000e+02
3.200000000000000000e+01 4.522846153846152788e+02 1.858892517089843750e+02 -7.512939453125000000e+00 6.996932029724121094e-01 5.882352963089942932e-02 8.983693237304687500e+02
5.400000000000000000e+01 4.578384615384615586e+02 1.887527770996093750e+02 -7.415313720703125000e+00 6.514998078346252441e-01 1.117647051811218262e+00 8.317196044921875000e+02
5.300000000000000000e+01 4.695615384615385324e+02 1.939724731445312500e+02 -7.317687988281250000e+00 6.919829249382019043e-01 1.235294103622436523e+00 9.056664428710937500e+02
2.500000000000000000e+01 4.635307692307693515e+02 2.040085754394531250e+02 -7.161346435546875000e+00 7.234609723091125488e-01 2.941176593303680420e-01 7.715158081054687500e+02
1.400000000000000000e+01 4.740153846153847326e+02 2.153776550292968750e+02 -6.985412597656250000e+00 7.089098691940307617e-01 1.176470637321472168e+00 7.290964355468750000e+02
4.400000000000000000e+01 4.866538461538458478e+02 2.232626953125000000e+02 -6.809478759765625000e+00 5.215364098548889160e-01 8.235294222831726074e-01 4.520416564941406250e+02
5.400000000000000000e+01 4.977230769230766327e+02 2.246213531494140625e+02 -6.633544921875000000e+00 4.187248051166534424e-01 8.235294222831726074e-01 4.575837402343750000e+02
1.600000000000000000e+01 5.242000000000000455e+02 2.286256713867187500e+02 -6.504058837890625000e+00 5.750805735588073730e-01 1.058823585510253906e+00 5.309793090820312500e+02
6.000000000000000000e+01 5.314230769230769056e+02 2.335848693847656250e+02 -6.374572753906250000e+00 5.631207227706909180e-01 0.000000000000000000e+00 5.401676025390625000e+02
6.600000000000000000e+01 5.503076923076922640e+02 2.369897918701171875e+02 -6.245056152343750000e+00 6.873509287834167480e-01 0.000000000000000000e+00 8.477586059570312500e+02
2.400000000000000000e+01 5.623153846153843460e+02 2.349288330078125000e+02 -6.147125244140625000e+00 6.408344507217407227e-01 6.470588445663452148e-01 7.699873657226562500e+02
1.700000000000000000e+01 5.657769230769232536e+02 2.338553466796875000e+02 -6.143859863281250000e+00 7.923158407211303711e-01 0.000000000000000000e+00 7.944542236328125000e+02
7.000000000000000000e+01 5.583538461538462343e+02 2.257186889648437500e+02 -6.140594482421875000e+00 6.517742276191711426e-01 2.941176593303680420e-01 7.353816528320312500e+02
5.300000000000000000e+01 5.612769230769230262e+02 2.211477203369140625e+02 -6.137329101562500000e+00 7.012618184089660645e-01 1.176470637321472168e+00 7.189746093750000000e+02
3.300000000000000000e+01 5.472461538461537884e+02 2.289047698974609375e+02 -6.605316162109375000e+00 4.227552711963653564e-01 1.117647051811218262e+00 3.672781066894531250e+02
2.600000000000000000e+01 5.714307692307692150e+02 2.304129333496093750e+02 -6.918426513671875000e+00 4.640898704528808594e-01 1.588235259056091309e+00 3.692564697265625000e+02
1.500000000000000000e+01 5.634846153846153811e+02 2.277185058593750000e+02 -7.231506347656250000e+00 4.865284562110900879e-01 1.529411792755126953e+00 3.676286926269531250e+02
2.600000000000000000e+01 5.657307692307692832e+02 2.259761505126953125e+02 -7.573791503906250000e+00 5.177737474441528320e-01 8.235294222831726074e-01 4.028445434570312500e+02
1.900000000000000000e+01 5.419461538461538339e+02 2.063507537841796875e+02 -7.925842285156250000e+00 4.013280868530273438e-01 6.470588445663452148e-01 4.206008911132812500e+02
1.200000000000000000e+01 5.466076923076922185e+02 1.992722625732421875e+02 -8.277862548828125000e+00 4.443351626396179199e-01 1.764705926179885864e-01 4.755787963867187500e+02
1.600000000000000000e+01 5.834307692307692150e+02 2.041694488525390625e+02 -8.629882812500000000e+00 7.252900600433349609e-01 7.058823704719543457e-01 5.376920166015625000e+02
4.200000000000000000e+01 5.982615384615382936e+02 2.177533569335937500e+02 -8.627990722656250000e+00 5.882808566093444824e-01 7.058823704719543457e-01 4.851154174804687500e+02
6.300000000000000000e+01 6.078000000000000682e+02 2.321111907958984375e+02 -8.626098632812500000e+00 5.705319046974182129e-01 1.000000000000000000e+00 4.592247924804687500e+02
1.400000000000000000e+01 6.020307692307686693e+02 2.513312683105468750e+02 -8.624206542968750000e+00 3.647681772708892822e-01 5.294117927551269531e-01 2.467529602050781250e+02
1.400000000000000000e+01 6.130846153846151765e+02 2.771907958984375000e+02 -8.541870117187500000e+00 3.105036616325378418e-01 1.176470637321472168e+00 1.207750015258789062e+02
2.200000000000000000e+01 6.363615384615384301e+02 3.014995422363281250e+02 -8.218322753906250000e+00 2.997130155563354492e-01 7.058823704719543457e-01 1.061496582031250000e+02
6.500000000000000000e+01 6.892692307692306031e+02 3.075907592773437500e+02 -7.894744873046875000e+00 5.074243545532226562e-01 8.823529481887817383e-01 2.225416564941406250e+02
4.600000000000000000e+01 7.135461538461538566e+02 3.147312316894531250e+02 -7.571197509765625000e+00 6.187450885772705078e-01 1.000000000000000000e+00 7.778992309570312500e+02
5.800000000000000000e+01 7.236538461538465299e+02 3.229477233886718750e+02 -7.062652587890625000e+00 6.255528926849365234e-01 5.882353186607360840e-01 5.998476562500000000e+02
5.400000000000000000e+01 7.060999999999997954e+02 3.132084350585937500e+02 -6.369140625000000000e+00 2.663825154304504395e-01 0.000000000000000000e+00 1.106106643676757812e+02
4.800000000000000000e+01 6.930538461538461661e+02 2.887237854003906250e+02 -5.675659179687500000e+00 5.177687406539916992e-01 0.000000000000000000e+00 2.230970458984375000e+02
5.000000000000000000e+00 7.872692307692311715e+02 2.857014770507812500e+02 -5.721740722656250000e-01 0.000000000000000000e+00 0.000000000000000000e+00 1.177543029785156250e+02
2.600000000000000000e+01 8.032769230769229125e+02 3.154403381347656250e+02 -1.458862304687500000e+00 9.999999776482582092e-03 0.000000000000000000e+00 3.724523620605468750e+02
1.400000000000000000e+01 8.275846153846155175e+02 3.367114868164062500e+02 -2.345550537109375000e+00 6.063716411590576172e-01 0.000000000000000000e+00 9.241363525390625000e+02
4.200000000000000000e+01 8.291307692307692605e+02 3.484310302734375000e+02 -2.725067138671875000e+00 5.246183872222900391e-01 0.000000000000000000e+00 1.192018676757812500e+03
2.900000000000000000e+01 8.218538461538464617e+02 3.544942016601562500e+02 -2.597381591796875000e+00 9.999999776482582092e-03 0.000000000000000000e+00 3.319265136718750000e+02
5.100000000000000000e+01 8.444615384615391349e+02 3.647128601074218750e+02 -2.469696044921875000e+00 1.495761573314666748e-01 0.000000000000000000e+00 8.439140625000000000e+02
2.500000000000000000e+01 8.688153846153844597e+02 3.824280700683593750e+02 -2.342010498046875000e+00 1.225970685482025146e-01 2.941176593303680420e-01 5.556511840820312500e+02
1.000000000000000000e+01 8.618999999999996362e+02 4.052560424804687500e+02 -1.753662109375000000e+00 9.999999776482582092e-03 5.882353186607360840e-01 5.349567260742187500e+02
4.400000000000000000e+01 2.392853846153846462e+03 4.708942871093750000e+02 2.212921142578125000e+00 0.000000000000000000e+00 0.000000000000000000e+00 4.260214538574218750e+02
3.100000000000000000e+01 2.011284615384615790e+03 5.004822387695312500e+02 1.127807617187500000e+00 0.000000000000000000e+00 2.352941185235977173e-01 8.102382202148437500e+02
5.500000000000000000e+01 1.169292307692307304e+03 4.243916320800781250e+02 -4.027099609375000000e-01 0.000000000000000000e+00 2.352941185235977173e-01 1.058787597656250000e+03
5.900000000000000000e+01 8.980230769230765873e+02 3.208212585449218750e+02 -7.785949707031250000e-01 9.999999776482582092e-03 0.000000000000000000e+00 1.058673339843750000e+03
4.600000000000000000e+01 4.532153846153847212e+02 1.772754211425781250e+02 -1.503295898437500000e+00 0.000000000000000000e+00 0.000000000000000000e+00 8.295634155273437500e+02
7.100000000000000000e+01 5.142846153846152220e+02 2.041798553466796875e+02 -1.601562500000000000e+00 9.999999776482582092e-03 4.705882370471954346e-01 1.142449218750000000e+03
5.100000000000000000e+01 5.070307692307694083e+02 2.246991271972656250e+02 -1.623229980468750000e+00 0.000000000000000000e+00 0.000000000000000000e+00 8.430039672851562500e+02
5.800000000000000000e+01 5.645769230769230944e+02 2.465640106201171875e+02 -1.644866943359375000e+00 0.000000000000000000e+00 2.352941185235977173e-01 8.063142089843750000e+02
6.100000000000000000e+01 8.194769230769234127e+02 2.683940734863281250e+02 -1.466522216796875000e+00 0.000000000000000000e+00 2.352941185235977173e-01 8.196701049804687500e+02
3.600000000000000000e+01 8.633846153846154721e+02 2.611891479492187500e+02 -1.391418457031250000e+00 0.000000000000000000e+00 0.000000000000000000e+00 8.365414428710937500e+02
5.600000000000000000e+01 8.133076923076919229e+02 2.307887268066406250e+02 -1.147247314453125000e+00 9.999999776482582092e-03 0.000000000000000000e+00 1.584596801757812500e+03
6.400000000000000000e+01 7.602230769230767464e+02 2.042735748291015625e+02 -1.025177001953125000e+00 9.999999776482582092e-03 0.000000000000000000e+00 1.312525268554687500e+03
6.000000000000000000e+01 6.871461538461536520e+02 1.925456848144531250e+02 -9.435729980468750000e-01 9.999999776482582092e-03 0.000000000000000000e+00 1.446464111328125000e+03
6.500000000000000000e+01 5.978307692307693060e+02 1.870113067626953125e+02 -9.024963378906250000e-01 0.000000000000000000e+00 0.000000000000000000e+00 1.183712890625000000e+03
5.400000000000000000e+01 5.350153846153845052e+02 1.820361022949218750e+02 -8.614196777343750000e-01 0.000000000000000000e+00 0.000000000000000000e+00 1.057339721679687500e+03
4.500000000000000000e+01 5.578615384615380890e+02 1.795139617919921875e+02 -8.203125000000000000e-01 9.999999776482582092e-03 0.000000000000000000e+00 1.192013305664062500e+03
7.200000000000000000e+01 5.879384615384616382e+02 1.828874816894531250e+02 -7.296752929687500000e-01 0.000000000000000000e+00 0.000000000000000000e+00 1.176442749023437500e+03
5.300000000000000000e+01 5.736461538461542204e+02 1.747455444335937500e+02 -6.225280761718750000e-01 0.000000000000000000e+00 0.000000000000000000e+00 9.970269775390625000e+02
6.900000000000000000e+01 5.689615384615383391e+02 1.675636901855468750e+02 -5.153808593750000000e-01 0.000000000000000000e+00 4.117647111415863037e-01 9.369700927734375000e+02
5.500000000000000000e+01 5.593923076923077815e+02 1.548513336181640625e+02 -4.082031250000000000e-01 0.000000000000000000e+00 0.000000000000000000e+00 7.964678955078125000e+02
6.200000000000000000e+01 5.522692307692307168e+02 1.265148239135742188e+02 -2.716369628906250000e-01 0.000000000000000000e+00 0.000000000000000000e+00 8.367655639648437500e+02
2.800000000000000000e+01 5.242384615384614790e+02 1.313243865966796875e+02 -1.350708007812500000e-01 0.000000000000000000e+00 5.882352963089942932e-02 7.349612426757812500e+02
1.500000000000000000e+01 4.739230769230770761e+02 1.538945617675781250e+02 1.495361328125000000e-03 0.000000000000000000e+00 0.000000000000000000e+00 6.929471435546875000e+02
4.000000000000000000e+00 4.666615384615386120e+02 1.428537445068359375e+02 2.985229492187500000e-01 0.000000000000000000e+00 0.000000000000000000e+00 6.735417480468750000e+02
2.500000000000000000e+01 4.494923076923077474e+02 1.226768798828125000e+02 3.103027343750000000e-01 0.000000000000000000e+00 1.764705926179885864e-01 6.750285644531250000e+02
3.900000000000000000e+01 4.337461538461537884e+02 1.571991271972656250e+02 -2.127990722656250000e-01 0.000000000000000000e+00 0.000000000000000000e+00 5.469545288085937500e+02
5.000000000000000000e+00 4.298615384615382595e+02 1.531937866210937500e+02 -4.441833496093750000e-01 0.000000000000000000e+00 5.882353186607360840e-01 5.112251586914062500e+02
2.500000000000000000e+01 4.218461538461539249e+02 1.362012481689453125e+02 -9.712829589843750000e-01 0.000000000000000000e+00 2.352941185235977173e-01 4.675541076660156250e+02
5.400000000000000000e+01 4.252384615384613653e+02 1.649434509277343750e+02 -1.267028808593750000e+00 0.000000000000000000e+00 0.000000000000000000e+00 4.789421691894531250e+02
6.600000000000000000e+01 4.662307692307694538e+02 2.490098266601562500e+02 -1.818267822265625000e+00 0.000000000000000000e+00 2.941176593303680420e-01 5.367565917968750000e+02
5.600000000000000000e+01 4.954076923076925141e+02 2.608945007324218750e+02 -2.222747802734375000e+00 9.999999776482582092e-03 0.000000000000000000e+00 5.831254882812500000e+02
4.000000000000000000e+01 5.028307692307688512e+02 2.374557037353515625e+02 -2.273956298828125000e+00 9.999999776482582092e-03 0.000000000000000000e+00 6.294907226562500000e+02
3.800000000000000000e+01 5.070538461538460524e+02 1.887981262207031250e+02 -2.241577148437500000e+00 9.999999776482582092e-03 0.000000000000000000e+00 4.366341857910156250e+02
4.500000000000000000e+01 4.910923076923075428e+02 1.492690124511718750e+02 -2.209167480468750000e+00 0.000000000000000000e+00 5.882353186607360840e-01 3.793629150390625000e+02
3.200000000000000000e+01 4.963230769230768828e+02 1.432225341796875000e+02 -2.176788330078125000e+00 9.999999776482582092e-03 2.941176593303680420e-01 3.382768859863281250e+02
3.200000000000000000e+01 4.868000000000000682e+02 1.593997955322265625e+02 -2.121246337890625000e+00 0.000000000000000000e+00 5.882353186607360840e-01 2.889776916503906250e+02
4.200000000000000000e+01 4.839846153846155516e+02 1.804168090820312500e+02 -2.058013916015625000e+00 0.000000000000000000e+00 0.000000000000000000e+00 2.831292419433593750e+02
4.500000000000000000e+01 4.706538461538459615e+02 1.953479766845703125e+02 -1.931549072265625000e+00 9.999999776482582092e-03 0.000000000000000000e+00 2.961022338867187500e+02
3.700000000000000000e+01 4.833615384615385437e+02 2.019138641357421875e+02 -2.015716552734375000e+00 9.999999776482582092e-03 0.000000000000000000e+00 2.832233886718750000e+02
4.500000000000000000e+01 4.916615384615385551e+02 2.156481781005859375e+02 -2.057800292968750000e+00 9.999999776482582092e-03 0.000000000000000000e+00 2.816114807128906250e+02
2.700000000000000000e+01 4.974999999999999432e+02 2.374997100830078125e+02 -2.139709472656250000e+00 9.999999776482582092e-03 0.000000000000000000e+00 2.438747100830078125e+02
2.400000000000000000e+01 4.904384615384615813e+02 2.518651885986328125e+02 -2.341156005859375000e+00 9.999999776482582092e-03 0.000000000000000000e+00 2.128028411865234375e+02
5.600000000000000000e+01 5.126615384615382709e+02 2.388224182128906250e+02 -2.744018554687500000e+00 9.999999776482582092e-03 0.000000000000000000e+00 2.290198822021484375e+02
4.300000000000000000e+01 5.359153846153845961e+02 2.141488342285156250e+02 -2.952941894531250000e+00 9.999999776482582092e-03 0.000000000000000000e+00 2.268510742187500000e+02
5.600000000000000000e+01 6.076615384615386120e+02 2.658902282714843750e+02 -3.730407714843750000e+00 1.500986218452453613e-01 0.000000000000000000e+00 2.213763275146484375e+02
5.700000000000000000e+01 6.226769230769227761e+02 2.954909973144531250e+02 -3.928070068359375000e+00 1.611425578594207764e-01 2.352941185235977173e-01 2.332243194580078125e+02
4.200000000000000000e+01 6.341076923076924459e+02 2.980040588378906250e+02 -4.026885986328125000e+00 1.847496181726455688e-01 2.352941185235977173e-01 2.205719451904296875e+02
3.900000000000000000e+01 6.511538461538463025e+02 2.744582519531250000e+02 -4.047576904296875000e+00 2.137682884931564331e-01 2.352941185235977173e-01 2.230618286132812500e+02
4.100000000000000000e+01 6.509153846153844825e+02 2.404843139648437500e+02 -4.057891845703125000e+00 2.446538060903549194e-01 8.235294222831726074e-01 2.538791046142578125e+02
4.500000000000000000e+01 6.527153846153845507e+02 2.017929840087890625e+02 -4.074859619140625000e+00 2.353033274412155151e-01 2.941176593303680420e-01 2.282294158935546875e+02
2.400000000000000000e+01 6.507769230769231399e+02 1.444776763916015625e+02 -4.148468017578125000e+00 2.595403492450714111e-01 0.000000000000000000e+00 2.128008422851562500e+02
3.700000000000000000e+01 6.401461538461537657e+02 1.076757583618164062e+02 -4.256683349609375000e+00 2.657667696475982666e-01 2.941176593303680420e-01 1.707697601318359375e+02
1.900000000000000000e+01 6.412846153846154493e+02 1.005275955200195312e+02 -4.362701416015625000e+00 2.717904746532440186e-01 0.000000000000000000e+00 1.511853485107421875e+02
1.200000000000000000e+01 6.380076923076921958e+02 1.020171813964843750e+02 -4.468688964843750000e+00 2.774412333965301514e-01 0.000000000000000000e+00 1.393016510009765625e+02
1.700000000000000000e+01 6.377384615384615927e+02 1.037022247314453125e+02 -4.574707031250000000e+00 2.905720472335815430e-01 2.941176593303680420e-01 1.357100982666015625e+02
3.100000000000000000e+01 6.230538461538460524e+02 1.068636245727539062e+02 -4.660430908203125000e+00 3.058215975761413574e-01 0.000000000000000000e+00 1.466175079345703125e+02
2.200000000000000000e+01 6.138846153846153584e+02 1.069134445190429688e+02 -4.739440917968750000e+00 2.951112091541290283e-01 0.000000000000000000e+00 1.016369705200195312e+02
2.700000000000000000e+01 6.010999999999999091e+02 1.038614501953125000e+02 -4.897430419921875000e+00 3.442011773586273193e-01 0.000000000000000000e+00 1.313892364501953125e+02
3.000000000000000000e+01 5.884153846153847098e+02 1.050094070434570312e+02 -4.852142333984375000e+00 3.564947545528411865e-01 0.000000000000000000e+00 1.085509033203125000e+02
9.000000000000000000e+00 5.784153846153842551e+02 8.889340972900390625e+01 -4.761596679687500000e+00 3.763749003410339355e-01 0.000000000000000000e+00 1.419202270507812500e+02
1.400000000000000000e+01 5.503846153846152447e+02 8.025124359130859375e+01 -4.552246093750000000e+00 3.345608413219451904e-01 4.705882370471954346e-01 8.017884826660156250e+01
2.200000000000000000e+01 5.425000000000002274e+02 9.404463958740234375e+01 -4.411956787109375000e+00 3.334086239337921143e-01 0.000000000000000000e+00 5.259692764282226562e+01
2.200000000000000000e+01 5.370153846153843915e+02 1.208709182739257812e+02 -4.271667480468750000e+00 3.198998868465423584e-01 5.294117927551269531e-01 1.899999618530273438e+01
2.000000000000000000e+01 6.098000000000002956e+02 3.172884521484375000e+02 -4.209167480468750000e+00 3.188212215900421143e-01 0.000000000000000000e+00 9.286237716674804688e+00
1.900000000000000000e+01 6.330769230769230944e+02 3.233229675292968750e+02 -3.905883789062500000e+00 3.377016484737396240e-01 0.000000000000000000e+00 5.563983535766601562e+01
6.000000000000000000e+00 6.654461538461539476e+02 3.277611389160156250e+02 -4.109893798828125000e+00 3.891343176364898682e-01 2.352941185235977173e-01 1.415182800292968750e+02
2.300000000000000000e+01 7.194076923076926278e+02 3.306817932128906250e+02 -4.920013427734375000e+00 3.869039714336395264e-01 0.000000000000000000e+00 1.873245697021484375e+02
2.300000000000000000e+01 7.396615384615386120e+02 3.313728637695312500e+02 -5.119384765625000000e+00 4.515029489994049072e-01 0.000000000000000000e+00 2.359928588867187500e+02
1.100000000000000000e+01 7.317153846153848917e+02 3.172801818847656250e+02 -5.318725585937500000e+00 4.427691102027893066e-01 5.294117927551269531e-01 2.643240356445312500e+02
1.800000000000000000e+01 7.391000000000004775e+02 2.726828002929687500e+02 -5.452484130859375000e+00 5.589933991432189941e-01 0.000000000000000000e+00 4.089580688476562500e+02
3.100000000000000000e+01 7.665923076923074859e+02 2.055873107910156250e+02 -5.656951904296875000e+00 5.205299258232116699e-01 0.000000000000000000e+00 4.010698547363281250e+02
2.100000000000000000e+01 7.851692307692303530e+02 2.038144683837890625e+02 -5.610229492187500000e+00 5.380623936653137207e-01 0.000000000000000000e+00 4.385557861328125000e+02
1.900000000000000000e+01 8.020461538461529472e+02 2.053507690429687500e+02 -5.573822021484375000e+00 5.261896848678588867e-01 0.000000000000000000e+00 4.518924865722656250e+02
2.100000000000000000e+01 7.865307692307690104e+02 2.158401031494140625e+02 -5.537384033203125000e+00 4.816577732563018799e-01 2.941176593303680420e-01 5.302327880859375000e+02
1.200000000000000000e+01 8.352615384615382936e+02 3.186933288574218750e+02 -5.581695556640625000e+00 5.304847955703735352e-01 0.000000000000000000e+00 5.518784179687500000e+02
2.000000000000000000e+01 8.477692307692307168e+02 3.754117736816406250e+02 -5.651367187500000000e+00 5.167204737663269043e-01 0.000000000000000000e+00 5.483246459960937500e+02
4.200000000000000000e+01 8.440153846153848463e+02 3.765711669921875000e+02 -5.775085449218750000e+00 5.399773716926574707e-01 0.000000000000000000e+00 5.678230590820312500e+02
1.700000000000000000e+01 8.480230769230772694e+02 3.765760498046875000e+02 -6.022521972656250000e+00 5.287954211235046387e-01 0.000000000000000000e+00 5.890216064453125000e+02
1.000000000000000000e+01 8.389461538461538339e+02 3.748928833007812500e+02 -6.134613037109375000e+00 5.200415849685668945e-01 0.000000000000000000e+00 5.946597900390625000e+02
2.100000000000000000e+01 8.449076923076924004e+02 3.715795898437500000e+02 -6.235015869140625000e+00 5.770110487937927246e-01 0.000000000000000000e+00 6.234536743164062500e+02
2.000000000000000000e+01 8.953153846153844597e+02 2.840067443847656250e+02 -5.494659423828125000e+00 4.076239168643951416e-01 0.000000000000000000e+00 4.032789306640625000e+02
2.100000000000000000e+01 9.144461538461534929e+02 3.876860961914062500e+02 -4.785705566406250000e+00 3.435651063919067383e-01 5.294117927551269531e-01 4.442466430664062500e+02
1.600000000000000000e+01 9.099384615384612971e+02 4.185178222656250000e+02 -4.300750732421875000e+00 2.808122634887695312e-01 5.882352963089942932e-02 3.925525817871093750e+02
3.000000000000000000e+01 9.413384615384616154e+02 4.107444458007812500e+02 -3.330780029296875000e+00 2.448061704635620117e-01 7.058823704719543457e-01 3.746789855957031250e+02
1.100000000000000000e+01 9.564769230769228443e+02 4.193959350585937500e+02 -2.850921630859375000e+00 1.789642274379730225e-01 5.882352963089942932e-02 3.191972351074218750e+02
2.900000000000000000e+01 9.791923076923075087e+02 4.403490600585937500e+02 -2.376190185546875000e+00 1.386990100145339966e-01 5.882352963089942932e-02 2.673082885742187500e+02
2.500000000000000000e+01 1.350223076923076860e+03 4.846896362304687500e+02 1.051956176757812500e+01 0.000000000000000000e+00 2.941176593303680420e-01 2.535220146179199219e+01
4.900000000000000000e+01 1.404938461538461979e+03 4.724662475585937500e+02 9.464843750000000000e+00 0.000000000000000000e+00 0.000000000000000000e+00 1.117234802246093750e+02
2.400000000000000000e+01 1.482699999999999591e+03 4.463492736816406250e+02 9.046203613281250000e+00 0.000000000000000000e+00 0.000000000000000000e+00 1.935438232421875000e+02
4.200000000000000000e+01 1.144561538461538703e+03 4.119671325683593750e+02 8.881805419921875000e+00 0.000000000000000000e+00 2.941176593303680420e-01 1.377482147216796875e+02
2.500000000000000000e+01 9.848615384615385437e+02 3.930531005859375000e+02 8.971618652343750000e+00 0.000000000000000000e+00 0.000000000000000000e+00 1.488451232910156250e+02
3.400000000000000000e+01 1.127530769230769010e+03 3.631851501464843750e+02 9.061462402343750000e+00 0.000000000000000000e+00 0.000000000000000000e+00 1.057627410888671875e+02
3.500000000000000000e+01 1.875153846153847098e+03 4.616976623535156250e+02 8.596191406250000000e+00 0.000000000000000000e+00 0.000000000000000000e+00 5.423452758789062500e+01
1.800000000000000000e+01 1.779384615384614563e+03 4.327083740234375000e+02 8.395568847656250000e+00 0.000000000000000000e+00 0.000000000000000000e+00 4.248168640136718750e+02
2.400000000000000000e+01 1.115523076923077269e+03 3.613679809570312500e+02 8.336120605468750000e+00 0.000000000000000000e+00 0.000000000000000000e+00 2.131101379394531250e+02
2.900000000000000000e+01 8.523307692307694197e+02 3.035241088867187500e+02 8.700256347656250000e+00 0.000000000000000000e+00 0.000000000000000000e+00 1.714871368408203125e+02
1.000000000000000000e+01 6.300923076923077133e+02 2.836227722167968750e+02 7.471038818359375000e+00 0.000000000000000000e+00 0.000000000000000000e+00 5.599614715576171875e+01
5.100000000000000000e+01 6.865615384615381345e+02 2.812647399902343750e+02 4.255920410156250000e+00 0.000000000000000000e+00 5.882352963089942932e-02 2.385556335449218750e+02
6.000000000000000000e+01 6.567153846153846644e+02 3.066250000000000000e+02 4.093658447265625000e+00 0.000000000000000000e+00 5.882353186607360840e-01 1.418205871582031250e+02
4.500000000000000000e+01 6.470461538461536293e+02 3.208853454589843750e+02 3.949523925781250000e+00 0.000000000000000000e+00 5.882352963089942932e-02 1.854293060302734375e+02
5.400000000000000000e+01 6.825384615384616609e+02 3.199959716796875000e+02 3.806365966796875000e+00 0.000000000000000000e+00 0.000000000000000000e+00 1.738347320556640625e+02
9.000000000000000000e+00 6.987461538461537884e+02 3.144044799804687500e+02 3.738159179687500000e+00 0.000000000000000000e+00 2.941176593303680420e-01 1.633684844970703125e+02
1.000000000000000000e+01 6.937692307692306031e+02 3.138391113281250000e+02 3.669982910156250000e+00 0.000000000000000000e+00 5.882353186607360840e-01 1.488314056396484375e+02
6.300000000000000000e+01 6.720153846153846189e+02 3.137885437011718750e+02 3.513153076171875000e+00 0.000000000000000000e+00 2.352941185235977173e-01 1.798642272949218750e+02
6.600000000000000000e+01 6.545000000000001137e+02 3.173235168457031250e+02 3.404144287109375000e+00 0.000000000000000000e+00 7.647058963775634766e-01 1.775166168212890625e+02
2.400000000000000000e+01 6.491769230769230035e+02 3.266954345703125000e+02 3.295104980468750000e+00 0.000000000000000000e+00 1.588235259056091309e+00 1.725399780273437500e+02
3.100000000000000000e+01 6.908923076923078952e+02 3.415293884277343750e+02 3.100311279296875000e+00 0.000000000000000000e+00 2.941176593303680420e-01 1.806007995605468750e+02
6.300000000000000000e+01 7.023538461538463480e+02 3.281882324218750000e+02 3.022308349609375000e+00 0.000000000000000000e+00 8.235294222831726074e-01 2.113416595458984375e+02
1.900000000000000000e+01 7.287538461538458705e+02 3.060176696777343750e+02 2.944305419921875000e+00 0.000000000000000000e+00 0.000000000000000000e+00 2.440444335937500000e+02
7.000000000000000000e+01 7.284000000000000909e+02 2.897957153320312500e+02 2.866302490234375000e+00 0.000000000000000000e+00 4.705882370471954346e-01 2.139884033203125000e+02
3.200000000000000000e+01 7.307153846153843233e+02 2.806577148437500000e+02 2.874328613281250000e+00 0.000000000000000000e+00 5.882352963089942932e-02 1.879976196289062500e+02
4.800000000000000000e+01 7.301692307692309214e+02 2.821430664062500000e+02 2.882385253906250000e+00 0.000000000000000000e+00 5.294117927551269531e-01 2.106355743408203125e+02
2.000000000000000000e+01 7.054307692307695561e+02 2.938939208984375000e+02 2.908294677734375000e+00 0.000000000000000000e+00 0.000000000000000000e+00 1.610595245361328125e+02
4.300000000000000000e+01 6.982384615384612516e+02 2.859729919433593750e+02 3.003051757812500000e+00 0.000000000000000000e+00 2.941176593303680420e-01 2.174003295898437500e+02
2.100000000000000000e+01 5.831076923076921048e+02 2.431117553710937500e+02 3.200897216796875000e+00 0.000000000000000000e+00 1.176470637321472168e+00 9.630001831054687500e+01
2.600000000000000000e+01 5.764846153846151537e+02 2.472944488525390625e+02 3.160858154296875000e+00 0.000000000000000000e+00 1.235294103622436523e+00 1.139644927978515625e+02
6.000000000000000000e+01 5.914307692307692150e+02 2.588627929687500000e+02 3.120788574218750000e+00 0.000000000000000000e+00 5.882353186607360840e-01 1.014631347656250000e+02
6.600000000000000000e+01 6.086615384615383846e+02 2.575780029296875000e+02 3.080718994140625000e+00 0.000000000000000000e+00 2.352941185235977173e-01 1.317751159667968750e+02
4.500000000000000000e+01 6.217769230769231399e+02 2.450506591796875000e+02 2.949035644531250000e+00 0.000000000000000000e+00 1.176470637321472168e+00 9.356835937500000000e+01
6.400000000000000000e+01 6.295307692307692378e+02 2.363468017578125000e+02 2.553039550781250000e+00 0.000000000000000000e+00 5.294117927551269531e-01 1.335058898925781250e+02
1.300000000000000000e+01 6.226230769230769511e+02 2.192925872802734375e+02 2.417449951171875000e+00 0.000000000000000000e+00 2.352941185235977173e-01 1.526714324951171875e+02
5.700000000000000000e+01 6.065846153846152902e+02 2.088192291259765625e+02 2.281860351562500000e+00 0.000000000000000000e+00 0.000000000000000000e+00 1.715942840576171875e+02
2.800000000000000000e+01 5.786923076923078497e+02 1.954973144531250000e+02 2.076660156250000000e+00 0.000000000000000000e+00 5.294117927551269531e-01 1.235726089477539062e+02
3.300000000000000000e+01 5.407538461538462116e+02 1.572908935546875000e+02 2.065826416015625000e+00 0.000000000000000000e+00 1.529411792755126953e+00 9.698178863525390625e+01
5.400000000000000000e+01 5.333384615384615017e+02 1.747865295410156250e+02 2.080902099609375000e+00 0.000000000000000000e+00 0.000000000000000000e+00 1.748006439208984375e+02
3.000000000000000000e+00 5.328999999999999773e+02 1.813280792236328125e+02 2.123474121093750000e+00 0.000000000000000000e+00 2.352941274642944336e+00 8.328344726562500000e+01
1.200000000000000000e+01 5.486692307692308077e+02 1.675243377685546875e+02 2.206512451171875000e+00 0.000000000000000000e+00 1.529411792755126953e+00 1.617150878906250000e+02
3.800000000000000000e+01 5.538230769230768828e+02 1.610333557128906250e+02 2.237365722656250000e+00 0.000000000000000000e+00 1.470588207244873047e+00 1.510335845947265625e+02
7.000000000000000000e+00 5.540615384615383618e+02 1.596226348876953125e+02 2.236846923828125000e+00 0.000000000000000000e+00 8.235294222831726074e-01 1.202289581298828125e+02
2.800000000000000000e+01 5.555384615384616609e+02 1.611931610107421875e+02 2.047454833984375000e+00 0.000000000000000000e+00 1.058823585510253906e+00 1.204642791748046875e+02
5.000000000000000000e+00 5.587846153846151083e+02 1.456226501464843750e+02 1.026184082031250000e+00 0.000000000000000000e+00 1.941176414489746094e+00 1.337062835693359375e+02
9.000000000000000000e+00 5.500999999999999091e+02 2.100762634277343750e+02 5.989379882812500000e-01 0.000000000000000000e+00 5.294117927551269531e-01 1.860463714599609375e+02
9.000000000000000000e+00 5.281769230769231172e+02 1.891186523437500000e+02 3.085327148437500000e-01 0.000000000000000000e+00 0.000000000000000000e+00 1.213464660644531250e+02
6.200000000000000000e+01 5.305384615384614335e+02 1.588994293212890625e+02 2.317504882812500000e-01 0.000000000000000000e+00 0.000000000000000000e+00 3.026665649414062500e+02
5.500000000000000000e+01 5.368461538461541522e+02 1.276189651489257812e+02 1.549987792968750000e-01 0.000000000000000000e+00 5.882352963089942932e-02 5.757077636718750000e+02
1.200000000000000000e+01 5.351461538461539931e+02 1.047828903198242188e+02 1.110534667968750000e-01 0.000000000000000000e+00 0.000000000000000000e+00 5.026582946777343750e+02
5.200000000000000000e+01 5.457384615384614790e+02 9.911963653564453125e+01 1.657104492187500000e-01 0.000000000000000000e+00 0.000000000000000000e+00 4.825999755859375000e+02
5.900000000000000000e+01 5.395461538461538566e+02 1.235626449584960938e+02 2.203674316406250000e-01 9.999999776482582092e-03 0.000000000000000000e+00 7.660699462890625000e+02
2.300000000000000000e+01 4.958230769230767123e+02 1.677872924804687500e+02 3.704528808593750000e-01 0.000000000000000000e+00 9.411764740943908691e-01 3.755346374511718750e+02
1.100000000000000000e+01 4.632615384615380663e+02 1.685406646728515625e+02 5.067138671875000000e-01 0.000000000000000000e+00 1.235294103622436523e+00 2.791838378906250000e+02
9.000000000000000000e+00 4.240923076923078838e+02 1.676328735351562500e+02 7.792358398437500000e-01 0.000000000000000000e+00 1.235294103622436523e+00 2.232300567626953125e+02
7.000000000000000000e+00 3.892461538461539021e+02 1.268188171386718750e+02 1.094055175781250000e+00 0.000000000000000000e+00 2.941176593303680420e-01 1.188794784545898438e+02
1.000000000000000000e+00 3.415076923076924231e+02 1.226334762573242188e+02 5.145263671875000000e-01 0.000000000000000000e+00 1.235294103622436523e+00 1.353287658691406250e+02
5.000000000000000000e+00 3.581307692307693742e+02 1.510509643554687500e+02 3.769531250000000000e-01 0.000000000000000000e+00 0.000000000000000000e+00 1.304041900634765625e+02
7.000000000000000000e+00 3.414307692307692150e+02 1.451429138183593750e+02 1.442565917968750000e-01 0.000000000000000000e+00 1.529411792755126953e+00 1.005658721923828125e+02
2.200000000000000000e+01 3.628846153846153015e+02 1.513611907958984375e+02 -9.090576171875000000e-01 0.000000000000000000e+00 1.352941155433654785e+00 1.170671310424804688e+02
1.600000000000000000e+01 4.027384615384613653e+02 1.732821350097656250e+02 -1.150054931640625000e+00 0.000000000000000000e+00 2.058823585510253906e+00 1.401874237060546875e+02
4.500000000000000000e+01 4.665153846153844484e+02 1.869110565185546875e+02 -1.149353027343750000e+00 0.000000000000000000e+00 1.058823585510253906e+00 1.997888183593750000e+02
1.200000000000000000e+01 5.166230769230771784e+02 2.081719818115234375e+02 -9.136352539062500000e-01 0.000000000000000000e+00 0.000000000000000000e+00 1.639507446289062500e+02
1.800000000000000000e+01 5.387769230769231399e+02 2.084157257080078125e+02 -7.969665527343750000e-01 0.000000000000000000e+00 0.000000000000000000e+00 2.007484436035156250e+02
4.800000000000000000e+01 5.617923076923077588e+02 2.055431213378906250e+02 -6.802978515625000000e-01 0.000000000000000000e+00 8.235294222831726074e-01 3.771614685058593750e+02
6.200000000000000000e+01 5.761384615384613426e+02 2.031981201171875000e+02 -5.999450683593750000e-01 0.000000000000000000e+00 1.882352948188781738e+00 2.858749389648437500e+02
6.500000000000000000e+01 5.557307692307695106e+02 2.914200744628906250e+02 -5.791931152343750000e-01 9.999999776482582092e-03 2.352941185235977173e-01 3.745639648437500000e+02
5.600000000000000000e+01 5.603230769230768828e+02 3.253251953125000000e+02 -6.711730957031250000e-01 0.000000000000000000e+00 0.000000000000000000e+00 3.836943664550781250e+02
5.800000000000000000e+01 5.944307692307692150e+02 3.302423095703125000e+02 -7.856140136718750000e-01 1.854570806026458740e-01 5.882352963089942932e-02 8.135303955078125000e+02
5.100000000000000000e+01 5.981999999999999318e+02 3.138988037109375000e+02 -9.674377441406250000e-01 2.995527684688568115e-01 5.882352963089942932e-02 1.006696166992187500e+03
3.000000000000000000e+01 5.464153846153844825e+02 2.654445495605468750e+02 -1.149230957031250000e+00 9.999999776482582092e-03 2.941176593303680420e-01 5.112507934570312500e+02
8.000000000000000000e+00 4.807076923076922981e+02 1.536355895996093750e+02 -1.729797363281250000e+00 0.000000000000000000e+00 2.176470518112182617e+00 4.408309631347656250e+02
4.200000000000000000e+01 5.150538461538460524e+02 1.699514160156250000e+02 -1.935028076171875000e+00 9.999999776482582092e-03 1.882352948188781738e+00 5.646489257812500000e+02
3.200000000000000000e+01 5.613769230769228216e+02 1.888592071533203125e+02 -2.140258789062500000e+00 9.999999776482582092e-03 5.882352963089942932e-02 5.271130371093750000e+02
5.800000000000000000e+01 5.856461538461536520e+02 2.061611175537109375e+02 -2.345977783203125000e+00 9.999999776482582092e-03 0.000000000000000000e+00 7.171530761718750000e+02
7.100000000000000000e+01 6.025384615384614335e+02 2.199884490966796875e+02 -2.551879882812500000e+00 1.024230495095252991e-01 0.000000000000000000e+00 7.957034301757812500e+02
6.700000000000000000e+01 6.361230769230768374e+02 2.353494567871093750e+02 -2.757781982421875000e+00 1.731524318456649780e-01 2.941176593303680420e-01 7.571253662109375000e+02
6.900000000000000000e+01 6.882846153846151083e+02 2.560362548828125000e+02 -2.963684082031250000e+00 4.294046461582183838e-01 5.882352963089942932e-02 1.015119445800781250e+03
6.100000000000000000e+01 6.953538461538458932e+02 2.802365112304687500e+02 -3.187927246093750000e+00 3.303373754024505615e-01 5.882352963089942932e-02 9.220853271484375000e+02
6.200000000000000000e+01 6.761307692307690331e+02 2.956450500488281250e+02 -3.412200927734375000e+00 2.947806119918823242e-01 0.000000000000000000e+00 9.728065795898437500e+02
6.700000000000000000e+01 6.201153846153846416e+02 2.861587829589843750e+02 -3.636444091796875000e+00 5.449379086494445801e-01 5.882352963089942932e-02 7.803043212890625000e+02
4.600000000000000000e+01 6.096692307692308077e+02 2.624201660156250000e+02 -3.842956542968750000e+00 3.866334259510040283e-01 2.941176593303680420e-01 1.079302856445312500e+03
5.300000000000000000e+01 5.484153846153844825e+02 2.402508239746093750e+02 -3.996276855468750000e+00 2.401581406593322754e-01 0.000000000000000000e+00 7.408796997070312500e+02
[truncated: 1,906,739 more chars]
