# Supplementary material for: Environmental Conditions for Alternative Tree Cover States in HighLatitudes
Source: Copernicus journal article supplement (doi:10.5194/bg-2016-401), 2016-10-11
Supplement: Supplementary file 4 [file bg-2016-401-supplement.zip › Analysis/files_to_load_and_import/boreal_ea_east_database_lai_included.txt]

0.000000000000000000e+00 2.318307692307692776e+02 1.284418487548828125e+02 3.063720703125000000e+00 0.000000000000000000e+00 1.882352948188781738e+00 3.261785888671875000e+03 3.757547140121459961e+00 4.000000000000000000e+00 1.000000000000000000e+00 -1.000000000000000000e+04 3.265113220214843750e+02 6.825000000000000000e+01 5.025000000000000000e+01
1.000000000000000000e+00 2.909769230769231854e+02 1.581514739990234375e+02 1.822204589843750000e+00 0.000000000000000000e+00 2.176470518112182617e+00 2.998191894531250000e+03 3.678549289703369141e+00 6.000000000000000000e+00 1.000000000000000000e+00 -1.000000000000000000e+04 3.931163330078125000e+02 7.125000000000000000e+01 5.025000000000000000e+01
0.000000000000000000e+00 3.068230769230770534e+02 1.690922088623046875e+02 1.604400634765625000e+00 0.000000000000000000e+00 2.529411792755126953e+00 2.974288574218750000e+03 3.655518531799316406e+00 4.000000000000000000e+00 1.000000000000000000e+00 -1.000000000000000000e+04 4.050573425292968750e+02 7.175000000000000000e+01 5.025000000000000000e+01
2.000000000000000000e+00 2.854384615384615245e+02 1.683820190429687500e+02 3.752441406250000000e-01 0.000000000000000000e+00 1.647058844566345215e+00 2.895221435546875000e+03 3.524822235107421875e+00 4.000000000000000000e+00 1.000000000000000000e+00 -1.000000000000000000e+04 6.101552734375000000e+02 7.525000000000000000e+01 5.025000000000000000e+01
1.000000000000000000e+00 2.844615384615385096e+02 1.415603790283203125e+02 2.331542968750000000e-01 0.000000000000000000e+00 1.000000000000000000e+00 2.901149414062500000e+03 3.462228536605834961e+00 4.000000000000000000e+00 1.000000000000000000e+00 -1.000000000000000000e+04 6.118051757812500000e+02 7.625000000000000000e+01 5.025000000000000000e+01
1.000000000000000000e+00 2.634384615384616382e+02 1.268571853637695312e+02 1.621093750000000000e-01 0.000000000000000000e+00 1.294117689132690430e+00 2.904113525390625000e+03 3.560824394226074219e+00 6.000000000000000000e+00 1.000000000000000000e+00 -4.992167968750000000e+03 4.230213012695312500e+02 7.675000000000000000e+01 5.025000000000000000e+01
0.000000000000000000e+00 2.715153846153846189e+02 1.167353515625000000e+02 3.265075683593750000e-01 0.000000000000000000e+00 1.823529362678527832e+00 2.920961181640625000e+03 3.745369672775268555e+00 3.000000000000000000e+00 1.000000000000000000e+00 -1.000000000000000000e+04 2.539526367187500000e+02 7.875000000000000000e+01 5.025000000000000000e+01
0.000000000000000000e+00 2.868384615384616723e+02 1.309755554199218750e+02 4.533996582031250000e-01 0.000000000000000000e+00 1.588235259056091309e+00 2.894641601562500000e+03 3.741411209106445312e+00 4.000000000000000000e+00 1.000000000000000000e+00 -1.000000000000000000e+04 2.428670959472656250e+02 7.925000000000000000e+01 5.025000000000000000e+01
2.000000000000000000e+00 3.065538461538461092e+02 1.451329650878906250e+02 5.802612304687500000e-01 0.000000000000000000e+00 6.470588445663452148e-01 2.868322265625000000e+03 3.727236747741699219e+00 4.000000000000000000e+00 1.000000000000000000e+00 -1.000000000000000000e+04 3.380545349121093750e+02 7.975000000000000000e+01 5.025000000000000000e+01
0.000000000000000000e+00 3.298769230769231058e+02 1.555369720458984375e+02 7.071228027343750000e-01 0.000000000000000000e+00 5.882352963089942932e-02 2.842002685546875000e+03 3.738618612289428711e+00 3.000000000000000000e+00 1.000000000000000000e+00 -7.496599609375000000e+03 2.329769592285156250e+02 8.025000000000000000e+01 5.025000000000000000e+01
3.000000000000000000e+00 3.609846153846153243e+02 1.704836883544921875e+02 7.582702636718750000e-01 0.000000000000000000e+00 1.058823585510253906e+00 2.797453613281250000e+03 3.576315641403198242e+00 4.000000000000000000e+00 1.000000000000000000e+00 -4.991807617187500000e+03 2.693361206054687500e+02 8.075000000000000000e+01 5.025000000000000000e+01
5.600000000000000000e+01 4.827769230769230262e+02 2.699453125000000000e+02 -2.625427246093750000e-01 0.000000000000000000e+00 1.764705896377563477e+00 2.349771484375000000e+03 1.842337727546691895e+00 1.300000000000000000e+01 4.000000000000000000e+00 -1.000000000000000000e+04 5.601923828125000000e+02 8.275000000000000000e+01 5.025000000000000000e+01
5.000000000000000000e+00 5.594923076923075769e+02 2.692866210937500000e+02 -2.689331054687500000e+00 5.554957389831542969e-01 0.000000000000000000e+00 1.747664428710937500e+03 1.457944869995117188e+00 1.300000000000000000e+01 1.000000000000000000e+00 -1.000000000000000000e+04 1.784354614257812500e+03 8.425000000000000000e+01 5.025000000000000000e+01
4.200000000000000000e+01 5.343000000000000682e+02 2.456836853027343750e+02 -3.742675781250000000e+00 3.916903436183929443e-01 5.882352963089942932e-02 1.596920532226562500e+03 2.556859254837036133e+00 1.300000000000000000e+01 3.000000000000000000e+00 -1.000000000000000000e+04 1.598643920898437500e+03 8.475000000000000000e+01 5.025000000000000000e+01
5.600000000000000000e+01 5.223923076923076678e+02 2.349637756347656250e+02 -4.877502441406250000e+00 1.404767334461212158e-01 0.000000000000000000e+00 1.462829345703125000e+03 2.681305885314941406e+00 1.300000000000000000e+01 4.000000000000000000e+00 -7.501594726562500000e+03 1.555259887695312500e+03 8.525000000000000000e+01 5.025000000000000000e+01
2.100000000000000000e+01 4.760692307692306144e+02 2.360423278808593750e+02 -7.147155761718750000e+00 3.292347192764282227e-01 0.000000000000000000e+00 1.194647094726562500e+03 2.191519498825073242e+00 1.300000000000000000e+01 3.000000000000000000e+00 -1.000000000000000000e+04 1.904590576171875000e+03 8.625000000000000000e+01 5.025000000000000000e+01
1.100000000000000000e+01 4.492230769230769738e+02 2.100226898193359375e+02 -8.131134033203125000e+00 3.825060427188873291e-01 5.882352963089942932e-02 1.114274902343750000e+03 2.431538581848144531e+00 1.300000000000000000e+01 1.000000000000000000e+00 -1.000000000000000000e+04 1.643565673828125000e+03 8.675000000000000000e+01 5.025000000000000000e+01
4.000000000000000000e+00 4.301384615384614563e+02 1.205886383056640625e+02 -1.009909057617187500e+01 5.081699490547180176e-01 2.352941185235977173e-01 9.535303955078125000e+02 1.857879400253295898e+00 1.300000000000000000e+01 1.000000000000000000e+00 -2.493378906250000000e+03 1.800085083007812500e+03 8.775000000000000000e+01 5.025000000000000000e+01
1.000000000000000000e+00 3.233923076923076678e+02 8.114678192138671875e+01 -3.327789306640625000e+00 9.999999776482582092e-03 5.882353186607360840e-01 1.722368286132812500e+03 2.493554353713989258e+00 3.000000000000000000e+00 1.000000000000000000e+00 -1.000100000000000000e+04 8.451375122070312500e+02 9.375000000000000000e+01 5.025000000000000000e+01
1.000000000000000000e+00 3.127846153846153925e+02 8.231511688232421875e+01 -3.200836181640625000e+00 9.999999776482582092e-03 0.000000000000000000e+00 1.717877319335937500e+03 3.164200544357299805e+00 4.000000000000000000e+00 1.000000000000000000e+00 -1.000100000000000000e+04 9.137860717773437500e+02 9.425000000000000000e+01 5.025000000000000000e+01
2.000000000000000000e+00 2.936076923076922753e+02 7.817037963867187500e+01 -3.073913574218750000e+00 1.173233911395072937e-01 2.941176593303680420e-01 1.713386352539062500e+03 3.287425041198730469e+00 4.000000000000000000e+00 1.000000000000000000e+00 -1.000000000000000000e+04 1.120840454101562500e+03 9.475000000000000000e+01 5.025000000000000000e+01
2.600000000000000000e+01 2.949153846153844256e+02 7.035367584228515625e+01 -2.946990966796875000e+00 1.010051071643829346e-01 5.294117927551269531e-01 1.708895385742187500e+03 3.046304702758789062e+00 4.000000000000000000e+00 3.000000000000000000e+00 -1.000000000000000000e+04 1.172561035156250000e+03 9.525000000000000000e+01 5.025000000000000000e+01
8.000000000000000000e+00 3.283461538461539249e+02 6.582400512695312500e+01 -3.075775146484375000e+00 7.348976731300354004e-01 1.882352948188781738e+00 1.682141479492187500e+03 2.313219785690307617e+00 1.300000000000000000e+01 1.000000000000000000e+00 -1.000000000000000000e+04 1.885563476562500000e+03 9.575000000000000000e+01 5.025000000000000000e+01
6.000000000000000000e+00 3.554076923076923435e+02 1.206260375976562500e+02 -8.080963134765625000e+00 7.160409092903137207e-01 2.352941185235977173e-01 1.258772216796875000e+03 2.077064037322998047e+00 1.300000000000000000e+01 1.000000000000000000e+00 -1.000000000000000000e+04 1.998361083984375000e+03 9.875000000000000000e+01 5.025000000000000000e+01
3.300000000000000000e+01 4.049538461538460297e+02 1.224992980957031250e+02 -7.903045654296875000e+00 7.004255652427673340e-01 5.882352963089942932e-02 1.379915893554687500e+03 2.671245574951171875e+00 1.300000000000000000e+01 3.000000000000000000e+00 1.740641021728515625e+01 1.724268554687500000e+03 1.012500000000000000e+02 5.025000000000000000e+01
3.600000000000000000e+01 5.055538461538462798e+02 1.311143798828125000e+02 -6.246643066406250000e+00 3.937230408191680908e-01 0.000000000000000000e+00 1.590500244140625000e+03 2.749874114990234375e+00 1.300000000000000000e+01 3.000000000000000000e+00 2.564468383789062500e+01 1.497812622070312500e+03 1.022500000000000000e+02 5.025000000000000000e+01
3.000000000000000000e+01 5.767692307692306031e+02 1.401393585205078125e+02 -5.418457031250000000e+00 1.875744611024856567e-01 5.882353186607360840e-01 1.695792358398437500e+03 1.952105760574340820e+00 1.300000000000000000e+01 3.000000000000000000e+00 2.346849441528320312e+01 1.470627563476562500e+03 1.027500000000000000e+02 5.025000000000000000e+01
4.300000000000000000e+01 6.531153846153846416e+02 1.541737365722656250e+02 -4.651794433593750000e+00 4.991805851459503174e-01 8.823529481887817383e-01 1.794485961914062500e+03 1.589421868324279785e+00 1.300000000000000000e+01 3.000000000000000000e+00 -2.485111572265625000e+03 1.605010742187500000e+03 1.032500000000000000e+02 5.025000000000000000e+01
2.300000000000000000e+01 6.570153846153845052e+02 1.588341064453125000e+02 -4.069732666015625000e+00 1.375535577535629272e-01 1.000000000000000000e+00 1.873383789062500000e+03 1.443492174148559570e+00 1.300000000000000000e+01 3.000000000000000000e+00 -7.502687500000000000e+03 1.156281005859375000e+03 1.037500000000000000e+02 5.025000000000000000e+01
6.600000000000000000e+01 6.256769230769230035e+02 1.587823944091796875e+02 -3.487670898437500000e+00 2.892604768276214600e-01 1.176470592617988586e-01 1.952281738281250000e+03 1.506144404411315918e+00 1.300000000000000000e+01 4.000000000000000000e+00 -2.505061279296875000e+03 1.266083374023437500e+03 1.042500000000000000e+02 5.025000000000000000e+01
5.000000000000000000e+00 5.111999999999998749e+02 1.464736022949218750e+02 -2.679290771484375000e+00 2.290734797716140747e-01 1.764705896377563477e+00 2.067472412109375000e+03 2.111310720443725586e+00 1.300000000000000000e+01 1.000000000000000000e+00 -7.497075195312500000e+03 1.134926391601562500e+03 1.052500000000000000e+02 5.025000000000000000e+01
2.900000000000000000e+01 4.433846153846153584e+02 1.415364379882812500e+02 -2.808746337890625000e+00 1.564346551895141602e-01 1.882352948188781738e+00 2.061160156250000000e+03 3.114890813827514648e+00 1.300000000000000000e+01 3.000000000000000000e+00 -1.000000000000000000e+04 1.004894531250000000e+03 1.057500000000000000e+02 5.025000000000000000e+01
6.000000000000000000e+00 3.832384615384614790e+02 1.393335723876953125e+02 -2.938201904296875000e+00 0.000000000000000000e+00 2.117647171020507812e+00 2.054847900390625000e+03 3.284044981002807617e+00 4.000000000000000000e+00 1.000000000000000000e+00 -1.000000000000000000e+04 7.126439208984375000e+02 1.062500000000000000e+02 5.025000000000000000e+01
6.000000000000000000e+00 3.632230769230769170e+02 1.198712921142578125e+02 -3.502838134765625000e+00 9.999999776482582092e-03 6.470588445663452148e-01 2.013378906250000000e+03 2.618690490722656250e+00 4.000000000000000000e+00 1.000000000000000000e+00 -7.503481445312500000e+03 8.488868408203125000e+02 1.072500000000000000e+02 5.025000000000000000e+01
6.200000000000000000e+01 3.878307692307691923e+02 1.189689788818359375e+02 -4.039916992187500000e+00 1.716171801090240479e-01 5.882353186607360840e-01 1.968607177734375000e+03 7.896538376808166504e-01 1.300000000000000000e+01 4.000000000000000000e+00 -1.000000000000000000e+04 1.089145019531250000e+03 1.077500000000000000e+02 5.025000000000000000e+01
3.500000000000000000e+01 3.841307692307690900e+02 1.303887939453125000e+02 -4.576995849609375000e+00 1.570272892713546753e-01 1.117647051811218262e+00 1.923835449218750000e+03 7.856416106224060059e-01 1.300000000000000000e+01 3.000000000000000000e+00 -1.000000000000000000e+04 1.044261352539062500e+03 1.082500000000000000e+02 5.025000000000000000e+01
4.000000000000000000e+01 3.871846153846153697e+02 1.431017303466796875e+02 -5.114074707031250000e+00 9.999999776482582092e-03 3.529411852359771729e-01 1.879063720703125000e+03 7.891605496406555176e-01 1.300000000000000000e+01 3.000000000000000000e+00 -4.994908691406250000e+03 9.339588012695312500e+02 1.087500000000000000e+02 5.025000000000000000e+01
6.300000000000000000e+01 3.971769230769231172e+02 1.471048278808593750e+02 -5.330688476562500000e+00 3.331739008426666260e-01 1.058823585510253906e+00 1.884905395507812500e+03 7.650864720344543457e-01 1.300000000000000000e+01 4.000000000000000000e+00 -1.000000000000000000e+04 1.387088378906250000e+03 1.092500000000000000e+02 5.025000000000000000e+01
4.400000000000000000e+01 3.955076923076927073e+02 1.482456970214843750e+02 -5.547302246093750000e+00 3.563883900642395020e-01 0.000000000000000000e+00 1.890747192382812500e+03 1.037041664123535156e+00 4.000000000000000000e+00 3.000000000000000000e+00 -1.000000000000000000e+04 1.242942382812500000e+03 1.097500000000000000e+02 5.025000000000000000e+01
1.200000000000000000e+01 3.938923076923075541e+02 1.548592681884765625e+02 -5.841796875000000000e+00 3.354838788509368896e-01 2.941176593303680420e-01 1.920056884765625000e+03 8.728026747703552246e-01 1.300000000000000000e+01 1.000000000000000000e+00 -4.994403808593750000e+03 1.116142578125000000e+03 1.107500000000000000e+02 5.025000000000000000e+01
5.600000000000000000e+01 3.782538461538460410e+02 1.518815765380859375e+02 -5.503601074218750000e+00 3.539665937423706055e-01 5.882353186607360840e-01 1.996403930664062500e+03 1.397162079811096191e+00 1.300000000000000000e+01 4.000000000000000000e+00 -1.000000000000000000e+04 1.284374633789062500e+03 1.112500000000000000e+02 5.025000000000000000e+01
5.200000000000000000e+01 3.596692307692306940e+02 1.416297607421875000e+02 -5.165405273437500000e+00 4.488808214664459229e-01 1.058823585510253906e+00 2.072750976562500000e+03 1.411905646324157715e+00 1.300000000000000000e+01 4.000000000000000000e+00 -4.992161621093750000e+03 1.593906860351562500e+03 1.117500000000000000e+02 5.025000000000000000e+01
4.900000000000000000e+01 3.426000000000001364e+02 1.297659301757812500e+02 -4.827178955078125000e+00 6.083596944808959961e-01 5.882353186607360840e-01 2.149097900390625000e+03 1.243371725082397461e+00 1.300000000000000000e+01 4.000000000000000000e+00 -2.515007568359375000e+03 1.411474853515625000e+03 1.122500000000000000e+02 5.025000000000000000e+01
8.000000000000000000e+00 3.110692307692310123e+02 1.286554870605468750e+02 -4.368499755859375000e+00 2.719208002090454102e-01 1.176470637321472168e+00 2.242038330078125000e+03 2.243354797363281250e+00 1.300000000000000000e+01 1.000000000000000000e+00 -7.494491210937500000e+03 1.200915649414062500e+03 1.127500000000000000e+02 5.025000000000000000e+01
7.000000000000000000e+00 2.817307692307692264e+02 1.195195770263671875e+02 -2.631103515625000000e+00 1.267765760421752930e-01 1.823529362678527832e+00 2.570639160156250000e+03 3.265826225280761719e+00 4.000000000000000000e+00 1.000000000000000000e+00 -7.497328125000000000e+03 8.864410400390625000e+02 1.142500000000000000e+02 5.025000000000000000e+01
8.000000000000000000e+00 2.655461538461537998e+02 1.155613861083984375e+02 -2.333923339843750000e+00 9.999999776482582092e-03 1.647058844566345215e+00 2.627245361328125000e+03 3.406329631805419922e+00 4.000000000000000000e+00 1.000000000000000000e+00 -4.991909667968750000e+03 7.487113037109375000e+02 1.147500000000000000e+02 5.025000000000000000e+01
2.000000000000000000e+00 2.661461538461539362e+02 1.140999374389648438e+02 -1.927551269531250000e+00 9.999999776482582092e-03 0.000000000000000000e+00 2.705172363281250000e+03 3.315467834472656250e+00 4.000000000000000000e+00 1.000000000000000000e+00 -7.500921386718750000e+03 6.596975708007812500e+02 1.157500000000000000e+02 5.025000000000000000e+01
5.000000000000000000e+00 2.703538461538460638e+02 1.225864486694335938e+02 -1.993621826171875000e+00 1.658510863780975342e-01 1.823529362678527832e+00 2.705230712890625000e+03 2.453156232833862305e+00 4.000000000000000000e+00 1.000000000000000000e+00 -2.492318603515625000e+03 9.496002197265625000e+02 1.167500000000000000e+02 5.025000000000000000e+01
2.000000000000000000e+00 2.892076923076923549e+02 1.317573699951171875e+02 -2.262878417968750000e+00 1.009324863553047180e-01 2.176470518112182617e+00 2.666325439453125000e+03 3.070638656616210938e+00 1.400000000000000000e+01 1.000000000000000000e+00 9.841482162475585938e+00 6.973150024414062500e+02 1.172500000000000000e+02 5.025000000000000000e+01
6.000000000000000000e+00 3.251769230769231740e+02 1.386900177001953125e+02 -3.298370361328125000e+00 1.363474577665328979e-01 3.058823585510253906e+00 2.531177246093750000e+03 2.489376306533813477e+00 4.000000000000000000e+00 1.000000000000000000e+00 -4.992062500000000000e+03 7.644033203125000000e+02 1.187500000000000000e+02 5.025000000000000000e+01
1.000000000000000000e+00 3.485076923076921958e+02 1.508248291015625000e+02 -4.201202392578125000e+00 1.041206419467926025e-01 1.411764740943908691e+00 2.423875000000000000e+03 1.671390891075134277e+00 1.300000000000000000e+01 1.000000000000000000e+00 -4.989886230468750000e+03 5.703580932617187500e+02 1.197500000000000000e+02 5.025000000000000000e+01
8.000000000000000000e+00 3.978153846153846871e+02 1.775301971435546875e+02 -4.489990234375000000e+00 2.276791632175445557e-01 1.000000000000000000e+00 2.387582763671875000e+03 1.550765752792358398e+00 1.300000000000000000e+01 1.000000000000000000e+00 2.256992530822753906e+01 7.386738281250000000e+02 1.207500000000000000e+02 5.025000000000000000e+01
3.800000000000000000e+01 4.237153846153846075e+02 1.904846191406250000e+02 -4.532043457031250000e+00 4.606032967567443848e-01 0.000000000000000000e+00 2.381271728515625000e+03 1.377848148345947266e+00 6.000000000000000000e+00 3.000000000000000000e+00 -2.493113037109375000e+03 8.593809814453125000e+02 1.212500000000000000e+02 5.025000000000000000e+01
5.300000000000000000e+01 4.531307692307691468e+02 1.955736541748046875e+02 -4.574096679687500000e+00 5.429489016532897949e-01 5.882352963089942932e-02 2.374960449218750000e+03 1.389480352401733398e+00 1.300000000000000000e+01 4.000000000000000000e+00 -1.000000000000000000e+04 9.764853515625000000e+02 1.217500000000000000e+02 5.025000000000000000e+01
4.900000000000000000e+01 4.646000000000001364e+02 1.951931610107421875e+02 -4.358062744140625000e+00 2.783548235893249512e-01 0.000000000000000000e+00 2.403577880859375000e+03 7.732042670249938965e-01 1.300000000000000000e+01 4.000000000000000000e+00 -1.000000000000000000e+04 7.652266235351562500e+02 1.222500000000000000e+02 5.025000000000000000e+01
5.700000000000000000e+01 4.691769230769232308e+02 2.006266021728515625e+02 -4.056030273437500000e+00 3.299607336521148682e-01 5.294117927551269531e-01 2.443837890625000000e+03 7.663060426712036133e-01 1.300000000000000000e+01 4.000000000000000000e+00 -1.000000000000000000e+04 8.202119140625000000e+02 1.227500000000000000e+02 5.025000000000000000e+01
4.900000000000000000e+01 4.768692307692308532e+02 2.053149414062500000e+02 -3.753997802734375000e+00 3.288129866123199463e-01 2.941176593303680420e-01 2.484098144531250000e+03 7.803637981414794922e-01 1.300000000000000000e+01 4.000000000000000000e+00 -1.000000000000000000e+04 6.886178588867187500e+02 1.232500000000000000e+02 5.025000000000000000e+01
3.200000000000000000e+01 4.840076923076921389e+02 2.022002258300781250e+02 -3.451965332031250000e+00 1.861265301704406738e-01 5.294117927551269531e-01 2.524358398437500000e+03 7.938984036445617676e-01 1.300000000000000000e+01 3.000000000000000000e+00 -2.492712646484375000e+03 5.566898193359375000e+02 1.237500000000000000e+02 5.025000000000000000e+01
1.100000000000000000e+01 4.663076923076922640e+02 1.965357055664062500e+02 -2.818206787109375000e+00 9.999999776482582092e-03 1.000000000000000000e+00 2.603249267578125000e+03 1.715497016906738281e+00 6.000000000000000000e+00 1.000000000000000000e+00 -4.994322753906250000e+03 3.649181213378906250e+02 1.247500000000000000e+02 5.025000000000000000e+01
3.800000000000000000e+01 4.614846153846153811e+02 2.031966705322265625e+02 -2.501312255859375000e+00 9.999999776482582092e-03 1.529411792755126953e+00 2.642694824218750000e+03 1.196899771690368652e+00 1.300000000000000000e+01 3.000000000000000000e+00 -7.497855957031250000e+03 3.203098754882812500e+02 1.252500000000000000e+02 5.025000000000000000e+01
3.300000000000000000e+01 4.691153846153848122e+02 2.114214324951171875e+02 -2.242645263671875000e+00 1.060778573155403137e-01 2.235294103622436523e+00 2.672505615234375000e+03 1.530210971832275391e+00 1.300000000000000000e+01 3.000000000000000000e+00 -1.000000000000000000e+04 4.947650146484375000e+02 1.257500000000000000e+02 5.025000000000000000e+01
3.100000000000000000e+01 5.031000000000002501e+02 2.233520965576171875e+02 -2.158569335937500000e+00 1.391417831182479858e-01 2.294117689132690430e+00 2.673412841796875000e+03 1.109868049621582031e+00 1.300000000000000000e+01 3.000000000000000000e+00 -4.995205078125000000e+03 5.090593566894531250e+02 1.262500000000000000e+02 5.025000000000000000e+01
4.200000000000000000e+01 5.110769230769227534e+02 2.320367736816406250e+02 -2.074493408203125000e+00 1.577079892158508301e-01 1.470588207244873047e+00 2.674320312500000000e+03 8.596883416175842285e-01 1.300000000000000000e+01 3.000000000000000000e+00 -1.000000000000000000e+04 5.123468017578125000e+02 1.267500000000000000e+02 5.025000000000000000e+01
3.500000000000000000e+01 5.222615384615384073e+02 2.328780975341796875e+02 -1.990447998046875000e+00 0.000000000000000000e+00 5.882353186607360840e-01 2.675227539062500000e+03 1.137380719184875488e+00 5.000000000000000000e+00 3.000000000000000000e+00 -2.490764892578125000e+03 2.185987396240234375e+02 1.272500000000000000e+02 5.025000000000000000e+01
7.000000000000000000e+00 5.427769230769229125e+02 2.311872406005859375e+02 -2.085296630859375000e+00 0.000000000000000000e+00 3.294117689132690430e+00 2.656245605468750000e+03 1.830146789550781250e+00 4.000000000000000000e+00 1.000000000000000000e+00 -4.995055175781250000e+03 1.322566070556640625e+02 1.277500000000000000e+02 5.025000000000000000e+01
1.000000000000000000e+01 5.964538461538461434e+02 2.409259948730468750e+02 -2.632873535156250000e+00 9.999999776482582092e-03 3.529411792755126953e+00 2.578503662109375000e+03 1.814887285232543945e+00 4.000000000000000000e+00 1.000000000000000000e+00 -1.000000000000000000e+04 2.274644012451171875e+02 1.287500000000000000e+02 5.025000000000000000e+01
2.600000000000000000e+01 6.201769230769230035e+02 2.442493591308593750e+02 -2.906646728515625000e+00 9.999999776482582092e-03 2.176470518112182617e+00 2.539632568359375000e+03 1.997451782226562500e+00 4.000000000000000000e+00 3.000000000000000000e+00 1.501169395446777344e+01 2.326413116455078125e+02 1.292500000000000000e+02 5.025000000000000000e+01
2.400000000000000000e+01 6.087076923076921275e+02 2.313113708496093750e+02 -3.228668212890625000e+00 9.999999776482582092e-03 1.588235259056091309e+00 2.486701416015625000e+03 2.031123638153076172e+00 4.000000000000000000e+00 3.000000000000000000e+00 -4.995130371093750000e+03 2.794729309082031250e+02 1.297500000000000000e+02 5.025000000000000000e+01
4.500000000000000000e+01 6.288999999999999773e+02 2.328466949462890625e+02 -3.904815673828125000e+00 9.999999776482582092e-03 1.470588207244873047e+00 2.371465820312500000e+03 8.667392134666442871e-01 5.000000000000000000e+00 4.000000000000000000e+00 -1.000000000000000000e+04 2.940028686523437500e+02 1.307500000000000000e+02 5.025000000000000000e+01
4.800000000000000000e+01 6.313076923076924913e+02 2.394390258789062500e+02 -4.242889404296875000e+00 2.969577014446258545e-01 5.882353186607360840e-01 2.313847900390625000e+03 8.498807549476623535e-01 1.300000000000000000e+01 4.000000000000000000e+00 -4.997530761718750000e+03 4.539077148437500000e+02 1.312500000000000000e+02 5.025000000000000000e+01
6.800000000000000000e+01 6.359076923076928551e+02 2.492402801513671875e+02 -4.479278564453125000e+00 2.400152683258056641e-01 5.882352963089942932e-02 2.272724365234375000e+03 8.408353328704833984e-01 1.300000000000000000e+01 4.000000000000000000e+00 -4.996914062500000000e+03 4.520592651367187500e+02 1.317500000000000000e+02 5.025000000000000000e+01
3.400000000000000000e+01 6.562461538461537884e+02 2.574144897460937500e+02 -4.715637207031250000e+00 1.804496198892593384e-01 5.882352963089942932e-02 2.231600585937500000e+03 9.010326862335205078e-01 1.300000000000000000e+01 3.000000000000000000e+00 -4.990285156250000000e+03 4.453389892578125000e+02 1.322500000000000000e+02 5.025000000000000000e+01
3.500000000000000000e+01 6.558615384615386574e+02 2.650438842773437500e+02 -4.952026367187500000e+00 2.861317098140716553e-01 2.941176593303680420e-01 2.190476806640625000e+03 8.183802366256713867e-01 1.300000000000000000e+01 3.000000000000000000e+00 -1.000000000000000000e+04 7.196923217773437500e+02 1.327500000000000000e+02 5.025000000000000000e+01
5.800000000000000000e+01 6.701384615384615699e+02 2.802762451171875000e+02 -5.162231445312500000e+00 2.732892930507659912e-01 2.941176593303680420e-01 2.149601074218750000e+03 1.309586524963378906e+00 1.300000000000000000e+01 4.000000000000000000e+00 -1.000000000000000000e+04 6.719083251953125000e+02 1.332500000000000000e+02 5.025000000000000000e+01
2.500000000000000000e+01 6.795230769230770420e+02 2.908748779296875000e+02 -5.294006347656250000e+00 5.144358277320861816e-01 5.882352963089942932e-02 2.109469482421875000e+03 2.215307474136352539e+00 1.300000000000000000e+01 3.000000000000000000e+00 -1.000000000000000000e+04 6.998667602539062500e+02 1.337500000000000000e+02 5.025000000000000000e+01
5.300000000000000000e+01 6.658846153846151310e+02 2.777305908203125000e+02 -5.521881103515625000e+00 3.062877953052520752e-01 5.882353186607360840e-01 2.013922729492187500e+03 1.228210210800170898e+00 1.300000000000000000e+01 4.000000000000000000e+00 -2.503943847656250000e+03 5.830982666015625000e+02 1.352500000000000000e+02 5.025000000000000000e+01
6.500000000000000000e+01 6.533307692307694197e+02 2.575565490722656250e+02 -5.318878173828125000e+00 4.682733118534088135e-01 1.176470592617988586e-01 2.023488037109375000e+03 1.235353469848632812e+00 1.300000000000000000e+01 4.000000000000000000e+00 -7.497306640625000000e+03 8.083577880859375000e+02 1.357500000000000000e+02 5.025000000000000000e+01
1.000000000000000000e+01 6.352923076923076451e+02 2.330328216552734375e+02 -5.115875244140625000e+00 1.516114771366119385e-01 1.352941155433654785e+00 2.033053222656250000e+03 1.434574127197265625e+00 1.300000000000000000e+01 1.000000000000000000e+00 5.538796234130859375e+01 5.940624389648437500e+02 1.362500000000000000e+02 5.025000000000000000e+01
4.600000000000000000e+01 6.294923076923072358e+02 2.094091949462890625e+02 -4.912872314453125000e+00 0.000000000000000000e+00 1.470588207244873047e+00 2.042618530273437500e+03 1.933886647224426270e+00 5.000000000000000000e+00 4.000000000000000000e+00 -1.000300000000000000e+04 4.321461868286132812e+01 1.367500000000000000e+02 5.025000000000000000e+01
3.300000000000000000e+01 6.858538461538462343e+02 2.134303588867187500e+02 -4.251403808593750000e+00 9.999999776482582092e-03 3.529411852359771729e-01 2.040265991210937500e+03 2.203658580780029297e+00 5.000000000000000000e+00 3.000000000000000000e+00 4.033283615112304688e+01 3.316464538574218750e+02 1.377500000000000000e+02 5.025000000000000000e+01
6.000000000000000000e+01 7.281923076923079634e+02 2.427363891601562500e+02 -3.902404785156250000e+00 4.825138151645660400e-01 3.529411852359771729e-01 2.037555175781250000e+03 1.554602146148681641e+00 1.300000000000000000e+01 4.000000000000000000e+00 1.721035957336425781e+01 6.880919189453125000e+02 1.382500000000000000e+02 5.025000000000000000e+01
2.100000000000000000e+01 7.604846153846156085e+02 2.792543640136718750e+02 -3.553436279296875000e+00 1.294784247875213623e-01 2.941176593303680420e-01 2.034844482421875000e+03 1.726386070251464844e+00 5.000000000000000000e+00 3.000000000000000000e+00 -7.495215820312500000e+03 4.907494506835937500e+02 1.387500000000000000e+02 5.025000000000000000e+01
1.400000000000000000e+01 7.693692307692308532e+02 3.126095886230468750e+02 -3.095245361328125000e+00 6.089280843734741211e-01 1.176470592617988586e-01 1.943825805664062500e+03 1.390817046165466309e+00 1.300000000000000000e+01 1.000000000000000000e+00 -2.479427734375000000e+03 8.864255371093750000e+02 1.392500000000000000e+02 5.025000000000000000e+01
5.000000000000000000e+01 7.421076923076921048e+02 3.321429138183593750e+02 -2.637023925781250000e+00 4.000960886478424072e-01 0.000000000000000000e+00 1.852807128906250000e+03 7.731316685676574707e-01 1.300000000000000000e+01 4.000000000000000000e+00 -1.000000000000000000e+04 8.686323242187500000e+02 1.397500000000000000e+02 5.025000000000000000e+01
4.100000000000000000e+01 7.142846153846154493e+02 3.493099060058593750e+02 -2.178833007812500000e+00 9.999999776482582092e-03 1.176470592617988586e-01 1.761788574218750000e+03 1.128891587257385254e+00 1.300000000000000000e+01 3.000000000000000000e+00 -1.000000000000000000e+04 4.415893554687500000e+02 1.402500000000000000e+02 5.025000000000000000e+01
1.100000000000000000e+01 7.794307692307689877e+02 4.093124084472656250e+02 -3.604125976562500000e-01 0.000000000000000000e+00 5.882353186607360840e-01 1.969839477539062500e+03 9.368132948875427246e-01 1.300000000000000000e+01 1.000000000000000000e+00 -1.000000000000000000e+04 1.462979736328125000e+02 1.427500000000000000e+02 5.025000000000000000e+01
2.400000000000000000e+01 8.129461538461536065e+02 4.214084777832031250e+02 -2.684631347656250000e-01 2.551532089710235596e-01 1.176470592617988586e-01 1.878045166015625000e+03 1.088621377944946289e+00 1.300000000000000000e+01 3.000000000000000000e+00 -7.497342285156250000e+03 6.789521484375000000e+02 1.432500000000000000e+02 5.025000000000000000e+01
1.000000000000000000e+00 2.414615384615383959e+02 1.429668426513671875e+02 2.803955078125000000e+00 0.000000000000000000e+00 2.000000000000000000e+00 3.204192382812500000e+03 3.714514970779418945e+00 4.000000000000000000e+00 1.000000000000000000e+00 -1.000000000000000000e+04 3.239410400390625000e+02 6.825000000000000000e+01 5.075000000000000000e+01
0.000000000000000000e+00 3.304076923076924004e+02 2.057458190917968750e+02 1.209350585937500000e+00 0.000000000000000000e+00 2.294117689132690430e+00 2.909716552734375000e+03 3.548535346984863281e+00 4.000000000000000000e+00 1.000000000000000000e+00 -1.000000000000000000e+04 4.993536987304687500e+02 7.275000000000000000e+01 5.075000000000000000e+01
1.000000000000000000e+00 3.378615384615386006e+02 2.182257385253906250e+02 1.042419433593750000e+00 0.000000000000000000e+00 2.647058725357055664e+00 2.894503173828125000e+03 3.541819572448730469e+00 3.000000000000000000e+00 1.000000000000000000e+00 -1.000000000000000000e+04 5.642650756835937500e+02 7.325000000000000000e+01 5.075000000000000000e+01
1.000000000000000000e+00 3.301923076923075655e+02 2.192889709472656250e+02 9.164428710937500000e-01 0.000000000000000000e+00 2.882352828979492188e+00 2.894370117187500000e+03 3.539850473403930664e+00 4.000000000000000000e+00 1.000000000000000000e+00 -7.502856933593750000e+03 4.262897338867187500e+02 7.375000000000000000e+01 5.075000000000000000e+01
0.000000000000000000e+00 3.158384615384615017e+02 2.084532623291015625e+02 7.904663085937500000e-01 0.000000000000000000e+00 1.705882310867309570e+00 2.894237060546875000e+03 3.544289588928222656e+00 4.000000000000000000e+00 1.000000000000000000e+00 -1.000000000000000000e+04 4.374061279296875000e+02 7.425000000000000000e+01 5.075000000000000000e+01
1.000000000000000000e+00 3.026846153846155403e+02 1.898249816894531250e+02 6.644897460937500000e-01 0.000000000000000000e+00 1.941176414489746094e+00 2.894104003906250000e+03 3.553765296936035156e+00 4.000000000000000000e+00 1.000000000000000000e+00 -2.511618164062500000e+03 4.648081359863281250e+02 7.475000000000000000e+01 5.075000000000000000e+01
1.000000000000000000e+00 2.620692307692307281e+02 1.279628448486328125e+02 4.402465820312500000e-01 0.000000000000000000e+00 1.941176414489746094e+00 2.916404785156250000e+03 3.645511388778686523e+00 4.000000000000000000e+00 1.000000000000000000e+00 -5.004753417968750000e+03 3.317688598632812500e+02 7.675000000000000000e+01 5.075000000000000000e+01
0.000000000000000000e+00 2.560615384615384187e+02 1.067962417602539062e+02 5.383911132812500000e-01 0.000000000000000000e+00 1.882352948188781738e+00 2.929910888671875000e+03 3.698742151260375977e+00 4.000000000000000000e+00 1.000000000000000000e+00 -7.497386718750000000e+03 2.714471740722656250e+02 7.775000000000000000e+01 5.075000000000000000e+01
2.000000000000000000e+00 2.680923076923078270e+02 1.114320755004882812e+02 6.636962890625000000e-01 0.000000000000000000e+00 1.529411792755126953e+00 2.943520507812500000e+03 3.739676237106323242e+00 8.000000000000000000e+00 1.000000000000000000e+00 -1.000000000000000000e+04 1.818998870849609375e+02 7.875000000000000000e+01 5.075000000000000000e+01
2.100000000000000000e+01 2.863153846153846303e+02 1.284070739746093750e+02 7.709960937500000000e-01 0.000000000000000000e+00 3.529411852359771729e-01 2.916595214843750000e+03 3.727974414825439453e+00 4.000000000000000000e+00 3.000000000000000000e+00 -4.982361816406250000e+03 1.953214569091796875e+02 7.925000000000000000e+01 5.075000000000000000e+01
2.000000000000000000e+01 3.079076923076923435e+02 1.473942260742187500e+02 8.782958984375000000e-01 0.000000000000000000e+00 5.882352963089942932e-02 2.889669921875000000e+03 2.622120618820190430e+00 4.000000000000000000e+00 3.000000000000000000e+00 -7.505584960937500000e+03 2.394573211669921875e+02 7.975000000000000000e+01 5.075000000000000000e+01
1.000000000000000000e+00 3.416769230769229466e+02 1.637974395751953125e+02 9.855957031250000000e-01 0.000000000000000000e+00 1.470588207244873047e+00 2.862744628906250000e+03 3.241024017333984375e+00 4.000000000000000000e+00 1.000000000000000000e+00 -7.501833007812500000e+03 3.675198364257812500e+02 8.025000000000000000e+01 5.075000000000000000e+01
2.000000000000000000e+00 3.729076923076921162e+02 1.857937164306640625e+02 1.018127441406250000e+00 0.000000000000000000e+00 1.647058844566345215e+00 2.817712402343750000e+03 3.309846162796020508e+00 4.000000000000000000e+00 1.000000000000000000e+00 -1.000000000000000000e+04 3.625657043457031250e+02 8.075000000000000000e+01 5.075000000000000000e+01
4.000000000000000000e+00 5.216846153846151992e+02 3.020645446777343750e+02 4.425659179687500000e-01 0.000000000000000000e+00 1.352941155433654785e+00 2.519654541015625000e+03 3.534632921218872070e+00 4.000000000000000000e+00 1.000000000000000000e+00 -5.004966308593750000e+03 5.787164306640625000e+02 8.225000000000000000e+01 5.075000000000000000e+01
5.600000000000000000e+01 5.425615384615385892e+02 3.067373046875000000e+02 -3.979492187500000000e-02 0.000000000000000000e+00 0.000000000000000000e+00 2.372566894531250000e+03 8.892448544502258301e-01 1.300000000000000000e+01 4.000000000000000000e+00 -1.000000000000000000e+04 6.773535766601562500e+02 8.275000000000000000e+01 5.075000000000000000e+01
6.200000000000000000e+01 5.649307692307688740e+02 3.033263549804687500e+02 -8.127441406250000000e-01 0.000000000000000000e+00 0.000000000000000000e+00 2.177744384765625000e+03 8.186109066009521484e-01 1.300000000000000000e+01 4.000000000000000000e+00 -2.503698242187500000e+03 7.276517944335937500e+02 8.325000000000000000e+01 5.075000000000000000e+01
5.300000000000000000e+01 5.788769230769231626e+02 2.854798278808593750e+02 -1.585662841796875000e+00 4.080756902694702148e-01 5.882352963089942932e-02 1.982921752929687500e+03 1.226682782173156738e+00 1.300000000000000000e+01 4.000000000000000000e+00 -7.501869628906250000e+03 1.275847656250000000e+03 8.375000000000000000e+01 5.075000000000000000e+01
4.400000000000000000e+01 5.890692307692307850e+02 2.544568481445312500e+02 -2.358581542968750000e+00 4.308814406394958496e-01 0.000000000000000000e+00 1.788099243164062500e+03 2.434162616729736328e+00 1.300000000000000000e+01 3.000000000000000000e+00 -1.000000000000000000e+04 1.399584228515625000e+03 8.425000000000000000e+01 5.075000000000000000e+01
4.500000000000000000e+01 5.775615384615382482e+02 2.289893646240234375e+02 -3.341461181640625000e+00 1.936034113168716431e-01 3.529411852359771729e-01 1.643780883789062500e+03 2.068598508834838867e+00 1.300000000000000000e+01 4.000000000000000000e+00 -1.000000000000000000e+04 1.531652954101562500e+03 8.475000000000000000e+01 5.075000000000000000e+01
2.200000000000000000e+01 5.608538461538460069e+02 2.246647796630859375e+02 -4.394287109375000000e+00 3.192706406116485596e-01 6.470588445663452148e-01 1.516297119140625000e+03 2.551162481307983398e+00 1.300000000000000000e+01 3.000000000000000000e+00 -1.000000000000000000e+04 1.707022216796875000e+03 8.525000000000000000e+01 5.075000000000000000e+01
4.600000000000000000e+01 5.261153846153847553e+02 2.162722015380859375e+02 -5.447143554687500000e+00 3.847309648990631104e-01 6.470588445663452148e-01 1.388813354492187500e+03 1.461617469787597656e+00 1.300000000000000000e+01 4.000000000000000000e+00 -4.997814941406250000e+03 1.465595092773437500e+03 8.575000000000000000e+01 5.075000000000000000e+01
1.400000000000000000e+01 4.968615384615385437e+02 2.134858398437500000e+02 -6.499969482421875000e+00 1.030790209770202637e-01 3.529411852359771729e-01 1.261329589843750000e+03 9.678984284400939941e-01 1.300000000000000000e+01 1.000000000000000000e+00 -4.995882324218750000e+03 1.202668334960937500e+03 8.625000000000000000e+01 5.075000000000000000e+01
3.200000000000000000e+01 4.895692307692307281e+02 2.121325225830078125e+02 -7.373779296875000000e+00 6.700493693351745605e-01 2.941176593303680420e-01 1.187722045898437500e+03 9.911853075027465820e-01 1.300000000000000000e+01 3.000000000000000000e+00 -2.496005859375000000e+03 1.801716674804687500e+03 8.675000000000000000e+01 5.075000000000000000e+01
5.600000000000000000e+01 4.851538461538461320e+02 1.875859985351562500e+02 -8.247589111328125000e+00 2.762475609779357910e-01 0.000000000000000000e+00 1.114114501953125000e+03 8.964365124702453613e-01 1.300000000000000000e+01 4.000000000000000000e+00 -7.499181152343750000e+03 1.622554321289062500e+03 8.725000000000000000e+01 5.075000000000000000e+01
5.100000000000000000e+01 4.359923076923077474e+02 1.522767791748046875e+02 -9.121398925781250000e+00 4.314635992050170898e-01 0.000000000000000000e+00 1.040506958007812500e+03 1.613144755363464355e+00 1.300000000000000000e+01 4.000000000000000000e+00 -4.995892089843750000e+03 1.503905761718750000e+03 8.775000000000000000e+01 5.075000000000000000e+01
5.600000000000000000e+01 3.975538461538463366e+02 1.385373840332031250e+02 -9.779815673828125000e+00 5.950536131858825684e-01 1.176470592617988586e-01 9.900430297851562500e+02 1.464447498321533203e+00 1.300000000000000000e+01 4.000000000000000000e+00 -4.995331054687500000e+03 1.670724853515625000e+03 8.825000000000000000e+01 5.075000000000000000e+01
3.400000000000000000e+01 3.072461538461539021e+02 9.582089996337890625e+01 -9.307708740234375000e+00 8.464636802673339844e-01 1.176470637321472168e+00 1.106284667968750000e+03 2.240710496902465820e+00 1.300000000000000000e+01 3.000000000000000000e+00 -7.497509277343750000e+03 1.615994506835937500e+03 9.025000000000000000e+01 5.075000000000000000e+01
4.100000000000000000e+01 3.709615384615386802e+02 9.066895294189453125e+01 -7.246490478515625000e+00 5.625050663948059082e-01 7.647058963775634766e-01 1.305715332031250000e+03 2.386757373809814453e+00 1.300000000000000000e+01 3.000000000000000000e+00 -4.995592773437500000e+03 1.755551513671875000e+03 9.125000000000000000e+01 5.075000000000000000e+01
6.000000000000000000e+00 4.177846153846153925e+02 9.145372009277343750e+01 -6.215881347656250000e+00 5.108225345611572266e-01 3.529411852359771729e-01 1.405430664062500000e+03 2.415667772293090820e+00 1.300000000000000000e+01 1.000000000000000000e+00 -1.000000000000000000e+04 1.705265014648437500e+03 9.175000000000000000e+01 5.075000000000000000e+01
2.600000000000000000e+01 3.732923076923074177e+02 8.064241790771484375e+01 -3.008422851562500000e+00 2.107853144407272339e-01 1.000000000000000000e+00 1.690610839843750000e+03 1.873390793800354004e+00 1.300000000000000000e+01 3.000000000000000000e+00 -2.487348144531250000e+03 1.404869018554687500e+03 9.525000000000000000e+01 5.075000000000000000e+01
2.400000000000000000e+01 3.835846153846154039e+02 7.950642395019531250e+01 -3.196441650390625000e+00 2.694167196750640869e-01 1.705882310867309570e+00 1.660576904296875000e+03 1.882137894630432129e+00 1.300000000000000000e+01 3.000000000000000000e+00 -7.497107910156250000e+03 1.344454467773437500e+03 9.575000000000000000e+01 5.075000000000000000e+01
5.500000000000000000e+01 3.938769230769229921e+02 8.203283691406250000e+01 -5.036315917968750000e+00 6.494212150573730469e-01 5.882353186607360840e-01 1.469070922851562500e+03 1.605771064758300781e+00 1.300000000000000000e+01 4.000000000000000000e+00 -1.000000000000000000e+04 1.797725952148437500e+03 9.675000000000000000e+01 5.075000000000000000e+01
6.300000000000000000e+01 3.729461538461539476e+02 8.947223663330078125e+01 -5.956237792968750000e+00 5.748520493507385254e-01 5.294117927551269531e-01 1.373317993164062500e+03 1.476877450942993164e+00 1.300000000000000000e+01 4.000000000000000000e+00 -4.996001953125000000e+03 1.556240722656250000e+03 9.725000000000000000e+01 5.075000000000000000e+01
1.200000000000000000e+01 3.689615384615383959e+02 1.081772613525390625e+02 -6.797729492187500000e+00 3.332208096981048584e-01 1.117647051811218262e+00 1.303540649414062500e+03 1.404220461845397949e+00 1.300000000000000000e+01 1.000000000000000000e+00 -1.000000000000000000e+04 1.356571655273437500e+03 9.775000000000000000e+01 5.075000000000000000e+01
2.000000000000000000e+00 3.617384615384616495e+02 1.309499664306640625e+02 -9.086944580078125000e+00 5.325277447700500488e-01 3.529411852359771729e-01 1.172135986328125000e+03 2.200160026550292969e+00 1.300000000000000000e+01 1.000000000000000000e+00 -7.499049316406250000e+03 1.646920410156250000e+03 9.925000000000000000e+01 5.075000000000000000e+01
3.200000000000000000e+01 4.308923076923076678e+02 1.303128356933593750e+02 -8.102844238281250000e+00 6.371715068817138672e-01 1.176470592617988586e-01 1.341405029296875000e+03 1.943864107131958008e+00 1.300000000000000000e+01 3.000000000000000000e+00 -1.000000000000000000e+04 1.740876586914062500e+03 1.012500000000000000e+02 5.075000000000000000e+01
3.000000000000000000e+01 4.846384615384616268e+02 1.356322021484375000e+02 -7.235321044921875000e+00 4.527752995491027832e-01 1.000000000000000000e+00 1.450349853515625000e+03 1.471866130828857422e+00 1.300000000000000000e+01 3.000000000000000000e+00 -1.000000000000000000e+04 1.693974731445312500e+03 1.017500000000000000e+02 5.075000000000000000e+01
2.200000000000000000e+01 6.063846153846154721e+02 1.485641479492187500e+02 -6.367797851562500000e+00 5.277315378189086914e-01 4.117647111415863037e-01 1.559294677734375000e+03 2.592703342437744141e+00 1.300000000000000000e+01 3.000000000000000000e+00 1.407356071472167969e+01 1.558683349609375000e+03 1.022500000000000000e+02 5.075000000000000000e+01
3.000000000000000000e+01 6.935846153846155175e+02 1.820421752929687500e+02 -5.500244140625000000e+00 1.737658381462097168e-01 7.647058963775634766e-01 1.668239624023437500e+03 1.773486018180847168e+00 1.300000000000000000e+01 3.000000000000000000e+00 -7.502044921875000000e+03 1.256008056640625000e+03 1.027500000000000000e+02 5.075000000000000000e+01
3.200000000000000000e+01 7.572153846153845507e+02 2.104272613525390625e+02 -4.692749023437500000e+00 3.494777381420135498e-01 5.882352963089942932e-02 1.770608276367187500e+03 1.429723143577575684e+00 1.300000000000000000e+01 3.000000000000000000e+00 -5.004586425781250000e+03 1.433500854492187500e+03 1.032500000000000000e+02 5.075000000000000000e+01
3.100000000000000000e+01 7.426615384615383846e+02 2.206188964843750000e+02 -4.065277099609375000e+00 2.759564220905303955e-01 1.411764740943908691e+00 1.853248413085937500e+03 1.455855488777160645e+00 1.300000000000000000e+01 3.000000000000000000e+00 -2.488763671875000000e+03 1.170563720703125000e+03 1.037500000000000000e+02 5.075000000000000000e+01
3.900000000000000000e+01 6.715461538461536293e+02 1.953856048583984375e+02 -2.810363769531250000e+00 2.390436381101608276e-01 1.294117689132690430e+00 2.018528686523437500e+03 1.157698631286621094e+00 1.300000000000000000e+01 3.000000000000000000e+00 -1.361408805847167969e+01 1.166395263671875000e+03 1.047500000000000000e+02 5.075000000000000000e+01
1.000000000000000000e+01 5.829153846153847098e+02 1.758954315185546875e+02 -2.530944824218750000e+00 1.219272017478942871e-01 1.882352948188781738e+00 2.058245605468750000e+03 2.462292194366455078e+00 4.000000000000000000e+00 1.000000000000000000e+00 -1.000000000000000000e+04 9.789197998046875000e+02 1.052500000000000000e+02 5.075000000000000000e+01
4.000000000000000000e+00 4.125923076923075996e+02 1.303024444580078125e+02 -2.668273925781250000e+00 0.000000000000000000e+00 2.058823585510253906e+00 2.051833496093750000e+03 3.248633861541748047e+00 4.000000000000000000e+00 1.000000000000000000e+00 -7.503272949218750000e+03 6.221490478515625000e+02 1.062500000000000000e+02 5.075000000000000000e+01
1.500000000000000000e+01 3.845846153846152902e+02 1.171777725219726562e+02 -2.736938476562500000e+00 0.000000000000000000e+00 2.588235378265380859e+00 2.048627441406250000e+03 2.314790010452270508e+00 4.000000000000000000e+00 1.000000000000000000e+00 -7.494526367187500000e+03 6.724612426757812500e+02 1.067500000000000000e+02 5.075000000000000000e+01
5.000000000000000000e+01 3.687692307692307736e+02 1.262026519775390625e+02 -3.185699462890625000e+00 9.999999776482582092e-03 1.705882310867309570e+00 2.011151977539062500e+03 1.886474728584289551e+00 4.000000000000000000e+00 4.000000000000000000e+00 -1.000000000000000000e+04 9.177760620117187500e+02 1.072500000000000000e+02 5.075000000000000000e+01
1.100000000000000000e+01 3.803769230769230489e+02 1.507579345703125000e+02 -4.336639404296875000e+00 9.999999776482582092e-03 2.000000000000000000e+00 1.913354736328125000e+03 1.856803894042968750e+00 1.300000000000000000e+01 1.000000000000000000e+00 -2.530670654296875000e+03 7.710650634765625000e+02 1.082500000000000000e+02 5.075000000000000000e+01
2.100000000000000000e+01 3.847307692307691696e+02 1.556751708984375000e+02 -4.912109375000000000e+00 1.498146951198577881e-01 2.117647171020507812e+00 1.864456176757812500e+03 1.058753252029418945e+00 1.300000000000000000e+01 3.000000000000000000e+00 -4.994550292968750000e+03 1.023711120605468750e+03 1.087500000000000000e+02 5.075000000000000000e+01
6.300000000000000000e+01 4.042846153846154493e+02 1.588434753417968750e+02 -5.207855224609375000e+00 3.512907028198242188e-01 7.058823704719543457e-01 1.862495239257812500e+03 7.741079330444335938e-01 1.300000000000000000e+01 4.000000000000000000e+00 -1.000000000000000000e+04 9.766940307617187500e+02 1.092500000000000000e+02 5.075000000000000000e+01
5.600000000000000000e+01 4.094153846153846530e+02 1.584742736816406250e+02 -5.503601074218750000e+00 4.941626787185668945e-01 5.882353186607360840e-01 1.860534423828125000e+03 7.602692842483520508e-01 1.300000000000000000e+01 4.000000000000000000e+00 -7.497390136718750000e+03 1.333476684570312500e+03 1.097500000000000000e+02 5.075000000000000000e+01
5.600000000000000000e+01 4.003230769230767692e+02 1.588834381103515625e+02 -5.799377441406250000e+00 6.023047566413879395e-01 1.647058844566345215e+00 1.858573608398437500e+03 7.498826980590820312e-01 1.300000000000000000e+01 4.000000000000000000e+00 -1.000000000000000000e+04 1.382190429687500000e+03 1.102500000000000000e+02 5.075000000000000000e+01
5.500000000000000000e+01 3.996461538461537657e+02 1.588088226318359375e+02 -5.950073242187500000e+00 4.174956083297729492e-01 1.823529362678527832e+00 1.873324584960937500e+03 9.823389649391174316e-01 1.300000000000000000e+01 4.000000000000000000e+00 -1.000000000000000000e+04 1.214022094726562500e+03 1.107500000000000000e+02 5.075000000000000000e+01
5.400000000000000000e+01 3.758076923076920366e+02 1.533008880615234375e+02 -5.665710449218750000e+00 2.206518203020095825e-01 5.882353186607360840e-01 1.938210815429687500e+03 8.383951783180236816e-01 1.300000000000000000e+01 4.000000000000000000e+00 -4.995677246093750000e+03 1.046741210937500000e+03 1.112500000000000000e+02 5.075000000000000000e+01
2.300000000000000000e+01 3.517076923076923549e+02 1.422865753173828125e+02 -5.381347656250000000e+00 4.041356444358825684e-01 4.117647111415863037e-01 2.003097167968750000e+03 8.749390244483947754e-01 1.300000000000000000e+01 3.000000000000000000e+00 -7.498157714843750000e+03 1.313973144531250000e+03 1.117500000000000000e+02 5.075000000000000000e+01
6.500000000000000000e+01 3.517692307692308304e+02 1.346206054687500000e+02 -5.096984863281250000e+00 4.583927094936370850e-01 2.941176593303680420e-01 2.067983398437500000e+03 1.827948570251464844e+00 1.300000000000000000e+01 4.000000000000000000e+00 -4.994761230468750000e+03 1.282486328125000000e+03 1.122500000000000000e+02 5.075000000000000000e+01
5.700000000000000000e+01 3.376615384615383277e+02 1.328625335693359375e+02 -4.683624267578125000e+00 4.587057828903198242e-01 1.117647051811218262e+00 2.151110839843750000e+03 1.883376002311706543e+00 1.300000000000000000e+01 4.000000000000000000e+00 -4.993641601562500000e+03 1.288969116210937500e+03 1.127500000000000000e+02 5.075000000000000000e+01
1.100000000000000000e+01 3.209230769230770193e+02 1.314629516601562500e+02 -4.141265869140625000e+00 1.547616422176361084e-01 1.705882310867309570e+00 2.252479492187500000e+03 2.237503767013549805e+00 1.300000000000000000e+01 1.000000000000000000e+00 -1.000000000000000000e+04 9.748952026367187500e+02 1.132500000000000000e+02 5.075000000000000000e+01
4.000000000000000000e+00 2.894769230769229011e+02 1.244170532226562500e+02 -2.345062255859375000e+00 9.999999776482582092e-03 1.588235259056091309e+00 2.592440185546875000e+03 2.910192966461181641e+00 4.000000000000000000e+00 1.000000000000000000e+00 -2.483978515625000000e+03 6.590015869140625000e+02 1.157500000000000000e+02 5.075000000000000000e+01
1.300000000000000000e+01 3.086692307692306940e+02 1.520849456787109375e+02 -2.631164550781250000e+00 2.490526288747787476e-01 1.764705896377563477e+00 2.567945556640625000e+03 1.591651916503906250e+00 5.000000000000000000e+00 1.000000000000000000e+00 -2.491219970703125000e+03 8.758236694335937500e+02 1.172500000000000000e+02 5.075000000000000000e+01
1.800000000000000000e+01 3.187307692307692264e+02 1.635206756591796875e+02 -2.878936767578125000e+00 3.895065784454345703e-01 1.705882310867309570e+00 2.535356201171875000e+03 1.581416130065917969e+00 4.000000000000000000e+00 1.000000000000000000e+00 -1.000000000000000000e+04 9.800322875976562500e+02 1.177500000000000000e+02 5.075000000000000000e+01
4.900000000000000000e+01 3.655230769230769283e+02 1.647061767578125000e+02 -4.464172363281250000e+00 3.135133683681488037e-01 1.352941155433654785e+00 2.354748046875000000e+03 1.153082489967346191e+00 1.300000000000000000e+01 4.000000000000000000e+00 -7.495977050781250000e+03 8.447094726562500000e+02 1.197500000000000000e+02 5.075000000000000000e+01
4.800000000000000000e+01 3.881692307692304666e+02 1.742246093750000000e+02 -4.704315185546875000e+00 3.134486377239227295e-01 2.941176593303680420e-01 2.327797119140625000e+03 1.142310857772827148e+00 1.300000000000000000e+01 4.000000000000000000e+00 -7.496341796875000000e+03 7.642426147460937500e+02 1.202500000000000000e+02 5.075000000000000000e+01
2.300000000000000000e+01 4.088615384615382595e+02 1.856203308105468750e+02 -4.754028320312500000e+00 3.391690552234649658e-01 0.000000000000000000e+00 2.321946533203125000e+03 7.489803433418273926e-01 6.000000000000000000e+00 3.000000000000000000e+00 -1.000000000000000000e+04 7.522435913085937500e+02 1.207500000000000000e+02 5.075000000000000000e+01
6.000000000000000000e+01 4.264692307692305917e+02 1.918995361328125000e+02 -4.803710937500000000e+00 4.834063947200775146e-01 0.000000000000000000e+00 2.316095703125000000e+03 1.161032915115356445e+00 6.000000000000000000e+00 4.000000000000000000e+00 -1.000000000000000000e+04 9.083332519531250000e+02 1.212500000000000000e+02 5.075000000000000000e+01
5.300000000000000000e+01 4.562769230769231967e+02 1.944167633056640625e+02 -4.853393554687500000e+00 5.678046941757202148e-01 0.000000000000000000e+00 2.310244873046875000e+03 1.334931135177612305e+00 1.300000000000000000e+01 4.000000000000000000e+00 -1.000000000000000000e+04 9.415878295898437500e+02 1.217500000000000000e+02 5.075000000000000000e+01
5.500000000000000000e+01 4.650615384615384755e+02 1.964665374755859375e+02 -4.640411376953125000e+00 6.503007411956787109e-01 2.352941185235977173e-01 2.339294921875000000e+03 1.118125796318054199e+00 1.300000000000000000e+01 4.000000000000000000e+00 -1.000000000000000000e+04 1.001637939453125000e+03 1.222500000000000000e+02 5.075000000000000000e+01
5.400000000000000000e+01 4.751461538461538794e+02 2.012409667968750000e+02 -4.339874267578125000e+00 5.302198529243469238e-01 0.000000000000000000e+00 2.379978271484375000e+03 7.332308888435363770e-01 1.300000000000000000e+01 4.000000000000000000e+00 -1.000000000000000000e+04 9.306531982421875000e+02 1.227500000000000000e+02 5.075000000000000000e+01
3.900000000000000000e+01 4.778461538461541522e+02 2.095638275146484375e+02 -4.039337158203125000e+00 4.225089848041534424e-01 0.000000000000000000e+00 2.420661865234375000e+03 7.556166052818298340e-01 1.300000000000000000e+01 3.000000000000000000e+00 1.101769256591796875e+01 8.322778320312500000e+02 1.232500000000000000e+02 5.075000000000000000e+01
5.200000000000000000e+01 4.835846153846154039e+02 2.093107604980468750e+02 -3.738769531250000000e+00 3.519141077995300293e-01 5.882353186607360840e-01 2.461345458984375000e+03 7.750975489616394043e-01 1.300000000000000000e+01 4.000000000000000000e+00 -4.996223144531250000e+03 6.095007934570312500e+02 1.237500000000000000e+02 5.075000000000000000e+01
4.700000000000000000e+01 4.787692307692308304e+02 2.012621917724609375e+02 -3.399902343750000000e+00 1.833900213241577148e-01 5.882352963089942932e-02 2.504207031250000000e+03 8.666948676109313965e-01 1.300000000000000000e+01 4.000000000000000000e+00 -2.489088623046875000e+03 4.796396179199218750e+02 1.242500000000000000e+02 5.075000000000000000e+01
2.400000000000000000e+01 4.740923076923074859e+02 1.985778198242187500e+02 -3.061035156250000000e+00 1.778890192508697510e-01 0.000000000000000000e+00 2.547068603515625000e+03 1.049042344093322754e+00 1.300000000000000000e+01 3.000000000000000000e+00 -2.494498291015625000e+03 4.676260070800781250e+02 1.247500000000000000e+02 5.075000000000000000e+01
4.100000000000000000e+01 4.651923076923076792e+02 2.108700103759765625e+02 -2.446563720703125000e+00 9.999999776482582092e-03 1.882352948188781738e+00 2.622735595703125000e+03 8.700546622276306152e-01 6.000000000000000000e+00 3.000000000000000000e+00 1.222743034362792969e+01 3.668355102539062500e+02 1.257500000000000000e+02 5.075000000000000000e+01
2.600000000000000000e+01 4.943615384615386006e+02 2.200443572998046875e+02 -2.360809326171875000e+00 1.342068612575531006e-01 2.117647171020507812e+00 2.625372802734375000e+03 8.439543843269348145e-01 1.300000000000000000e+01 3.000000000000000000e+00 -4.995051757812500000e+03 4.588038635253906250e+02 1.262500000000000000e+02 5.075000000000000000e+01
2.500000000000000000e+01 5.006538461538462457e+02 2.273418273925781250e+02 -2.275054931640625000e+00 1.195897981524467468e-01 1.470588207244873047e+00 2.628010009765625000e+03 8.578090667724609375e-01 1.300000000000000000e+01 3.000000000000000000e+00 -1.000000000000000000e+04 4.104921875000000000e+02 1.267500000000000000e+02 5.075000000000000000e+01
5.800000000000000000e+01 5.449461538461539476e+02 2.276130371093750000e+02 -2.292114257812500000e+00 0.000000000000000000e+00 2.058823585510253906e+00 2.610902832031250000e+03 1.382826685905456543e+00 4.000000000000000000e+00 4.000000000000000000e+00 7.784885406494140625e+00 1.371932067871093750e+02 1.277500000000000000e+02 5.075000000000000000e+01
1.800000000000000000e+01 5.721923076923076223e+02 2.242283935546875000e+02 -2.583496093750000000e+00 9.999999776482582092e-03 2.823529481887817383e+00 2.568777343750000000e+03 1.819096803665161133e+00 4.000000000000000000e+00 1.000000000000000000e+00 -1.000000000000000000e+04 1.756461486816406250e+02 1.282500000000000000e+02 5.075000000000000000e+01
7.000000000000000000e+00 6.031769230769227761e+02 2.303797607421875000e+02 -2.874877929687500000e+00 9.999999776482582092e-03 2.705882310867309570e+00 2.526651611328125000e+03 1.806198835372924805e+00 5.000000000000000000e+00 1.000000000000000000e+00 -1.000000000000000000e+04 2.071368713378906250e+02 1.287500000000000000e+02 5.075000000000000000e+01
4.300000000000000000e+01 6.155000000000001137e+02 2.376683654785156250e+02 -3.166259765625000000e+00 9.999999776482582092e-03 2.823529481887817383e+00 2.484525878906250000e+03 1.785250186920166016e+00 5.000000000000000000e+00 3.000000000000000000e+00 -4.988984375000000000e+03 2.237992401123046875e+02 1.292500000000000000e+02 5.075000000000000000e+01
3.000000000000000000e+01 6.023923076923078952e+02 2.329446716308593750e+02 -3.527160644531250000e+00 9.999999776482582092e-03 1.764705896377563477e+00 2.426823730468750000e+03 1.841675519943237305e+00 5.000000000000000000e+00 3.000000000000000000e+00 -4.995731445312500000e+03 2.284121856689453125e+02 1.297500000000000000e+02 5.075000000000000000e+01
1.800000000000000000e+01 6.093538461538462343e+02 2.299266967773437500e+02 -3.911224365234375000e+00 1.247612684965133667e-01 1.352941155433654785e+00 2.363929443359375000e+03 1.745288729667663574e+00 5.000000000000000000e+00 1.000000000000000000e+00 6.086696624755859375e+00 2.823172607421875000e+02 1.302500000000000000e+02 5.075000000000000000e+01
3.500000000000000000e+01 6.327769230769231399e+02 2.313813018798828125e+02 -4.295318603515625000e+00 3.275998830795288086e-01 6.470588445663452148e-01 2.301035156250000000e+03 8.292938470840454102e-01 1.300000000000000000e+01 3.000000000000000000e+00 1.474421882629394531e+01 7.642727050781250000e+02 1.307500000000000000e+02 5.075000000000000000e+01
6.900000000000000000e+01 6.357153846153845507e+02 2.315944061279296875e+02 -4.679382324218750000e+00 5.914037823677062988e-01 9.411764740943908691e-01 2.238140625000000000e+03 8.142085671424865723e-01 1.300000000000000000e+01 4.000000000000000000e+00 -2.493263183593750000e+03 7.676093750000000000e+02 1.312500000000000000e+02 5.075000000000000000e+01
6.000000000000000000e+01 6.445230769230767010e+02 2.312066497802734375e+02 -4.947845458984375000e+00 3.920899629592895508e-01 9.411764740943908691e-01 2.193812011718750000e+03 8.222162723541259766e-01 1.300000000000000000e+01 4.000000000000000000e+00 -1.000000000000000000e+04 6.525900268554687500e+02 1.317500000000000000e+02 5.075000000000000000e+01
4.200000000000000000e+01 6.552384615384614790e+02 2.299708709716796875e+02 -5.216308593750000000e+00 1.611195504665374756e-01 1.058823585510253906e+00 2.149483398437500000e+03 8.242177963256835938e-01 1.300000000000000000e+01 3.000000000000000000e+00 -2.495000732421875000e+03 3.464712524414062500e+02 1.322500000000000000e+02 5.075000000000000000e+01
6.200000000000000000e+01 6.613846153846156994e+02 2.486380920410156250e+02 -5.484771728515625000e+00 4.142257273197174072e-01 1.352941155433654785e+00 2.105155029296875000e+03 8.623211383819580078e-01 1.300000000000000000e+01 4.000000000000000000e+00 -4.980266113281250000e+03 6.952625122070312500e+02 1.327500000000000000e+02 5.075000000000000000e+01
5.200000000000000000e+01 6.790846153846151765e+02 2.734784545898437500e+02 -5.717224121093750000e+00 6.045342683792114258e-01 1.058823585510253906e+00 2.062358886718750000e+03 7.665072083473205566e-01 1.300000000000000000e+01 4.000000000000000000e+00 -2.497060058593750000e+03 8.137489624023437500e+02 1.332500000000000000e+02 5.075000000000000000e+01
1.600000000000000000e+01 6.811461538461536520e+02 2.894382324218750000e+02 -5.841644287109375000e+00 4.073457717895507812e-01 2.941176593303680420e-01 2.024159912109375000e+03 7.612159252166748047e-01 1.300000000000000000e+01 1.000000000000000000e+00 4.215334320068359375e+01 7.985698852539062500e+02 1.337500000000000000e+02 5.075000000000000000e+01
5.200000000000000000e+01 6.793846153846156994e+02 2.931211547851562500e+02 -5.966064453125000000e+00 3.887639045715332031e-01 5.882352963089942932e-02 1.985961181640625000e+03 9.691312313079833984e-01 1.300000000000000000e+01 4.000000000000000000e+00 -2.494088134765625000e+03 6.500584716796875000e+02 1.342500000000000000e+02 5.075000000000000000e+01
4.700000000000000000e+01 6.873615384615384301e+02 2.841932983398437500e+02 -6.090515136718750000e+00 9.275892972946166992e-01 5.882353186607360840e-01 1.947762329101562500e+03 1.926741003990173340e+00 1.300000000000000000e+01 4.000000000000000000e+00 1.797353363037109375e+01 1.304722045898437500e+03 1.347500000000000000e+02 5.075000000000000000e+01
2.600000000000000000e+01 6.680384615384615472e+02 2.715869750976562500e+02 -6.026489257812500000e+00 7.427182197570800781e-01 2.941176593303680420e-01 1.938982666015625000e+03 1.755904316902160645e+00 1.300000000000000000e+01 3.000000000000000000e+00 1.474413394927978516e+01 1.112381469726562500e+03 1.352500000000000000e+02 5.075000000000000000e+01
5.300000000000000000e+01 6.334923076923076906e+02 2.575877990722656250e+02 -5.774078369140625000e+00 2.637450397014617920e-01 5.882353186607360840e-01 1.959622070312500000e+03 1.588525056838989258e+00 1.300000000000000000e+01 4.000000000000000000e+00 -7.497574707031250000e+03 5.005629577636718750e+02 1.357500000000000000e+02 5.075000000000000000e+01
4.700000000000000000e+01 6.365615384615382482e+02 2.352333374023437500e+02 -5.521636962890625000e+00 6.040239334106445312e-01 2.941176593303680420e-01 1.980261596679687500e+03 1.525317311286926270e+00 1.300000000000000000e+01 4.000000000000000000e+00 -7.495133300781250000e+03 8.076112060546875000e+02 1.362500000000000000e+02 5.075000000000000000e+01
2.100000000000000000e+01 6.179076923076922867e+02 2.109690856933593750e+02 -5.269195556640625000e+00 1.689414978027343750e-01 1.176470592617988586e-01 2.000901000976562500e+03 2.001602172851562500e+00 1.300000000000000000e+01 3.000000000000000000e+00 1.125104522705078125e+01 2.345931243896484375e+02 1.367500000000000000e+02 5.075000000000000000e+01
2.600000000000000000e+01 7.403769230769232763e+02 2.235747222900390625e+02 -4.178497314453125000e+00 2.972240149974822998e-01 2.941176593303680420e-01 2.023681762695312500e+03 1.579604625701904297e+00 1.300000000000000000e+01 3.000000000000000000e+00 6.126425170898437500e+01 5.759637451171875000e+02 1.382500000000000000e+02 5.075000000000000000e+01
4.400000000000000000e+01 7.563692307692308532e+02 2.572341308593750000e+02 -3.804809570312500000e+00 3.864593505859375000e-01 5.882352963089942932e-02 2.030089355468750000e+03 1.303054690361022949e+00 1.300000000000000000e+01 3.000000000000000000e+00 -2.458865966796875000e+03 7.294168090820312500e+02 1.387500000000000000e+02 5.075000000000000000e+01
1.600000000000000000e+01 7.346923076923077360e+02 2.931197814941406250e+02 -3.375061035156250000e+00 1.556135714054107666e-01 8.823529481887817383e-01 1.950292114257812500e+03 1.177019357681274414e+00 1.300000000000000000e+01 1.000000000000000000e+00 -4.992187011718750000e+03 4.673628845214843750e+02 1.392500000000000000e+02 5.075000000000000000e+01
5.800000000000000000e+01 7.219769230769228443e+02 3.239285278320312500e+02 -2.945312500000000000e+00 2.134094387292861938e-01 4.117647111415863037e-01 1.870494995117187500e+03 1.239378929138183594e+00 1.300000000000000000e+01 4.000000000000000000e+00 -4.995782714843750000e+03 6.180996093750000000e+02 1.397500000000000000e+02 5.075000000000000000e+01
3.600000000000000000e+01 7.562923076923080998e+02 4.194258422851562500e+02 -7.486267089843750000e-01 9.999999776482582092e-03 5.882353186607360840e-01 1.969013793945312500e+03 7.088801264762878418e-01 1.300000000000000000e+01 3.000000000000000000e+00 -7.497895019531250000e+03 3.979743652343750000e+02 1.427500000000000000e+02 5.075000000000000000e+01
5.600000000000000000e+01 8.043999999999995225e+02 4.244310913085937500e+02 -6.534423828125000000e-01 3.630962967872619629e-01 0.000000000000000000e+00 1.864982543945312500e+03 1.486016750335693359e+00 1.300000000000000000e+01 4.000000000000000000e+00 -2.486739013671875000e+03 8.888444824218750000e+02 1.432500000000000000e+02 5.075000000000000000e+01
0.000000000000000000e+00 2.585461538461538566e+02 1.552320251464843750e+02 2.244903564453125000e+00 0.000000000000000000e+00 1.647058844566345215e+00 3.088532714843750000e+03 3.636082887649536133e+00 4.000000000000000000e+00 1.000000000000000000e+00 -1.000000000000000000e+04 3.436220092773437500e+02 6.875000000000000000e+01 5.125000000000000000e+01
0.000000000000000000e+00 2.846230769230770079e+02 1.671095123291015625e+02 1.836364746093750000e+00 0.000000000000000000e+00 1.764705896377563477e+00 2.994041992187500000e+03 3.627963066101074219e+00 4.000000000000000000e+00 1.000000000000000000e+00 -1.000000000000000000e+04 3.093370971679687500e+02 7.025000000000000000e+01 5.125000000000000000e+01
0.000000000000000000e+00 2.959384615384615813e+02 1.717911224365234375e+02 1.709350585937500000e+00 0.000000000000000000e+00 2.352941274642944336e+00 2.967856689453125000e+03 3.625536441802978516e+00 6.000000000000000000e+00 1.000000000000000000e+00 -1.000000000000000000e+04 3.303067016601562500e+02 7.075000000000000000e+01 5.125000000000000000e+01
1.000000000000000000e+00 3.265384615384616609e+02 1.981929016113281250e+02 1.365753173828125000e+00 0.000000000000000000e+00 2.294117689132690430e+00 2.919262695312500000e+03 3.612018108367919922e+00 4.000000000000000000e+00 1.000000000000000000e+00 -1.000000000000000000e+04 4.064066467285156250e+02 7.225000000000000000e+01 5.125000000000000000e+01
1.200000000000000000e+01 3.135461538461537430e+02 2.160373229980468750e+02 1.032257080078125000e+00 0.000000000000000000e+00 2.000000000000000000e+00 2.912973144531250000e+03 3.608543634414672852e+00 4.000000000000000000e+00 1.000000000000000000e+00 -1.000000000000000000e+04 3.374220886230468750e+02 7.425000000000000000e+01 5.125000000000000000e+01
1.000000000000000000e+00 2.972769230769230262e+02 1.984574737548828125e+02 9.682312011718750000e-01 0.000000000000000000e+00 1.470588207244873047e+00 2.918892333984375000e+03 3.603430986404418945e+00 4.000000000000000000e+00 1.000000000000000000e+00 -1.000000000000000000e+04 3.724777221679687500e+02 7.475000000000000000e+01 5.125000000000000000e+01
1.000000000000000000e+00 2.883692307692306827e+02 1.749492492675781250e+02 9.303588867187500000e-01 0.000000000000000000e+00 1.705882310867309570e+00 2.927268310546875000e+03 3.619255065917968750e+00 4.000000000000000000e+00 1.000000000000000000e+00 -1.000000000000000000e+04 3.218961181640625000e+02 7.525000000000000000e+01 5.125000000000000000e+01
0.000000000000000000e+00 2.592230769230769738e+02 1.357721099853515625e+02 8.951110839843750000e-01 0.000000000000000000e+00 1.705882310867309570e+00 2.959767089843750000e+03 3.706954956054687500e+00 4.000000000000000000e+00 1.000000000000000000e+00 -1.000000000000000000e+04 1.858110198974609375e+02 7.675000000000000000e+01 5.125000000000000000e+01
1.000000000000000000e+00 2.569923076923078042e+02 1.268102951049804688e+02 9.377746582031250000e-01 0.000000000000000000e+00 1.823529362678527832e+00 2.968323242187500000e+03 3.722013711929321289e+00 4.000000000000000000e+00 1.000000000000000000e+00 -1.000000000000000000e+04 1.506039886474609375e+02 7.725000000000000000e+01 5.125000000000000000e+01
1.000000000000000000e+00 2.523153846153846871e+02 1.187093658447265625e+02 9.985656738281250000e-01 0.000000000000000000e+00 2.294117689132690430e+00 2.976120117187500000e+03 3.731107473373413086e+00 4.000000000000000000e+00 1.000000000000000000e+00 -1.000000000000000000e+04 1.460004882812500000e+02 7.775000000000000000e+01 5.125000000000000000e+01
0.000000000000000000e+00 2.566153846153844142e+02 1.158896408081054688e+02 1.059387207031250000e+00 0.000000000000000000e+00 2.470588207244873047e+00 2.983917236328125000e+03 3.735184431076049805e+00 4.000000000000000000e+00 1.000000000000000000e+00 -7.503034667968750000e+03 1.700292053222656250e+02 7.825000000000000000e+01 5.125000000000000000e+01
1.000000000000000000e+00 2.864923076923076337e+02 1.375219879150390625e+02 1.205291748046875000e+00 0.000000000000000000e+00 1.470588207244873047e+00 2.965030517578125000e+03 3.715825557708740234e+00 4.000000000000000000e+00 1.000000000000000000e+00 -1.000000000000000000e+04 1.987043914794921875e+02 7.925000000000000000e+01 5.125000000000000000e+01
1.000000000000000000e+00 3.078076923076922640e+02 1.572028198242187500e+02 1.290374755859375000e+00 0.000000000000000000e+00 9.411764740943908691e-01 2.938346679687500000e+03 3.616865634918212891e+00 4.000000000000000000e+00 1.000000000000000000e+00 -1.000000000000000000e+04 2.359214935302734375e+02 7.975000000000000000e+01 5.125000000000000000e+01
1.000000000000000000e+00 3.742769230769230262e+02 1.873459014892578125e+02 1.397521972656250000e+00 0.000000000000000000e+00 1.294117689132690430e+00 2.868957275390625000e+03 3.614939212799072266e+00 4.000000000000000000e+00 1.000000000000000000e+00 -2.489350341796875000e+03 2.197910003662109375e+02 8.075000000000000000e+01 5.125000000000000000e+01
2.300000000000000000e+01 5.913846153846151310e+02 2.880766906738281250e+02 -1.340026855468750000e-01 0.000000000000000000e+00 1.764705896377563477e+00 2.298807617187500000e+03 2.972032070159912109e+00 1.300000000000000000e+01 3.000000000000000000e+00 -7.498566406250000000e+03 7.712743530273437500e+02 8.325000000000000000e+01 5.125000000000000000e+01
1.400000000000000000e+01 5.886769230769230035e+02 2.632796936035156250e+02 -7.652893066406250000e-01 0.000000000000000000e+00 2.941176593303680420e-01 2.130509277343750000e+03 1.081452608108520508e+00 1.300000000000000000e+01 1.000000000000000000e+00 -7.498937011718750000e+03 6.919133300781250000e+02 8.375000000000000000e+01 5.125000000000000000e+01
2.000000000000000000e+01 5.962384615384618201e+02 2.415399932861328125e+02 -1.396575927734375000e+00 7.232962250709533691e-01 0.000000000000000000e+00 1.962210815429687500e+03 2.398351192474365234e+00 1.300000000000000000e+01 3.000000000000000000e+00 -2.493920898437500000e+03 1.903739013671875000e+03 8.425000000000000000e+01 5.125000000000000000e+01
2.300000000000000000e+01 5.771615384615386120e+02 2.318738861083984375e+02 -2.240203857421875000e+00 9.999999776482582092e-03 2.941176593303680420e-01 1.826180541992187500e+03 2.798462867736816406e+00 1.300000000000000000e+01 3.000000000000000000e+00 -4.996082031250000000e+03 1.000171142578125000e+03 8.475000000000000000e+01 5.125000000000000000e+01
1.200000000000000000e+01 5.569846153846153811e+02 2.285362091064453125e+02 -3.154602050781250000e+00 9.999999776482582092e-03 5.882352963089942932e-02 1.700906250000000000e+03 2.803117990493774414e+00 1.300000000000000000e+01 1.000000000000000000e+00 -1.000000000000000000e+04 1.214802978515625000e+03 8.525000000000000000e+01 5.125000000000000000e+01
2.500000000000000000e+01 5.549769230769234127e+02 2.309181213378906250e+02 -4.069000244140625000e+00 2.739217579364776611e-01 1.176470592617988586e-01 1.575631958007812500e+03 1.703357100486755371e+00 1.300000000000000000e+01 3.000000000000000000e+00 -1.000000000000000000e+04 1.327098876953125000e+03 8.575000000000000000e+01 5.125000000000000000e+01
3.200000000000000000e+01 4.716615384615384414e+02 2.651993103027343750e+02 -7.285400390625000000e+00 0.000000000000000000e+00 0.000000000000000000e+00 1.227826538085937500e+03 1.090219020843505859e+00 1.300000000000000000e+01 3.000000000000000000e+00 -2.494614257812500000e+03 1.134285156250000000e+03 8.775000000000000000e+01 5.125000000000000000e+01
3.000000000000000000e+01 4.684307692307691013e+02 2.153960571289062500e+02 -7.929473876953125000e+00 8.407263159751892090e-01 0.000000000000000000e+00 1.185552001953125000e+03 1.171973705291748047e+00 1.300000000000000000e+01 3.000000000000000000e+00 -7.502445312500000000e+03 1.778966552734375000e+03 8.875000000000000000e+01 5.125000000000000000e+01
1.000000000000000000e+01 4.412692307692307168e+02 1.810735778808593750e+02 -7.984313964843750000e+00 8.960747718811035156e-01 2.352941185235977173e-01 1.196238647460937500e+03 1.146751999855041504e+00 1.300000000000000000e+01 1.000000000000000000e+00 -7.497601074218750000e+03 1.948863525390625000e+03 8.925000000000000000e+01 5.125000000000000000e+01
8.000000000000000000e+00 4.135923076923075996e+02 1.525115966796875000e+02 -8.039154052734375000e+00 5.854576826095581055e-01 3.529411852359771729e-01 1.206925292968750000e+03 1.505241870880126953e+00 1.300000000000000000e+01 1.000000000000000000e+00 -7.498937500000000000e+03 1.711888427734375000e+03 8.975000000000000000e+01 5.125000000000000000e+01
8.000000000000000000e+00 3.669615384615383391e+02 1.349888000488281250e+02 -7.680084228515625000e+00 3.641799390316009521e-01 6.470588445663452148e-01 1.251514526367187500e+03 2.609570741653442383e+00 1.300000000000000000e+01 1.000000000000000000e+00 -1.000000000000000000e+04 1.473194580078125000e+03 9.025000000000000000e+01 5.125000000000000000e+01
3.000000000000000000e+00 3.458999999999999773e+02 1.233972778320312500e+02 -6.907104492187500000e+00 9.999999776482582092e-03 1.117647051811218262e+00 1.330006347656250000e+03 2.914694309234619141e+00 1.300000000000000000e+01 1.000000000000000000e+00 -4.997734863281250000e+03 8.614673461914062500e+02 9.075000000000000000e+01 5.125000000000000000e+01
2.000000000000000000e+00 3.575692307692309555e+02 1.129400253295898438e+02 -6.134124755859375000e+00 9.999999776482582092e-03 1.058823585510253906e+00 1.408498046875000000e+03 3.045584917068481445e+00 1.300000000000000000e+01 1.000000000000000000e+00 -1.000000000000000000e+04 8.560924072265625000e+02 9.125000000000000000e+01 5.125000000000000000e+01
6.000000000000000000e+00 4.208461538461538680e+02 1.098255996704101562e+02 -5.361145019531250000e+00 9.999999776482582092e-03 1.235294103622436523e+00 1.486989868164062500e+03 2.912179470062255859e+00 1.300000000000000000e+01 1.000000000000000000e+00 -7.501893554687500000e+03 1.080395874023437500e+03 9.175000000000000000e+01 5.125000000000000000e+01
1.900000000000000000e+01 5.298076923076924913e+02 1.124696578979492188e+02 -4.794494628906250000e+00 1.362325996160507202e-01 2.176470518112182617e+00 1.541487915039062500e+03 2.640586614608764648e+00 1.300000000000000000e+01 1.000000000000000000e+00 -7.498174316406250000e+03 1.213892211914062500e+03 9.225000000000000000e+01 5.125000000000000000e+01
6.500000000000000000e+01 5.755692307692306713e+02 1.132535552978515625e+02 -4.296661376953125000e+00 5.367946028709411621e-01 2.294117689132690430e+00 1.587988159179687500e+03 2.758956432342529297e+00 1.300000000000000000e+01 4.000000000000000000e+00 -7.497381835937500000e+03 1.329839111328125000e+03 9.275000000000000000e+01 5.125000000000000000e+01
4.700000000000000000e+01 5.801692307692305803e+02 1.102158508300781250e+02 -3.798828125000000000e+00 2.917641401290893555e-01 2.058823585510253906e+00 1.634488281250000000e+03 2.141851902008056641e+00 1.300000000000000000e+01 4.000000000000000000e+00 -4.997650390625000000e+03 1.453328735351562500e+03 9.325000000000000000e+01 5.125000000000000000e+01
8.000000000000000000e+00 5.260923076923074859e+02 9.487647247314453125e+01 -3.364532470703125000e+00 9.999999776482582092e-03 1.235294103622436523e+00 1.666546997070312500e+03 2.946915149688720703e+00 4.000000000000000000e+00 1.000000000000000000e+00 -1.000000000000000000e+04 7.201566772460937500e+02 9.425000000000000000e+01 5.125000000000000000e+01
8.000000000000000000e+00 4.570846153846155744e+02 9.749790191650390625e+01 -3.428100585937500000e+00 9.999999776482582092e-03 8.235294222831726074e-01 1.652105468750000000e+03 3.136203765869140625e+00 1.300000000000000000e+01 1.000000000000000000e+00 -1.000000000000000000e+04 8.027224121093750000e+02 9.475000000000000000e+01 5.125000000000000000e+01
1.200000000000000000e+01 4.385923076923075996e+02 1.001921234130859375e+02 -3.491668701171875000e+00 1.721615344285964966e-01 2.470588207244873047e+00 1.637664062500000000e+03 3.099432945251464844e+00 1.300000000000000000e+01 1.000000000000000000e+00 -1.000000000000000000e+04 9.950728759765625000e+02 9.525000000000000000e+01 5.125000000000000000e+01
1.500000000000000000e+01 4.121076923076922185e+02 9.960437011718750000e+01 -3.762359619140625000e+00 2.321683913469314575e-01 2.176470518112182617e+00 1.604402221679687500e+03 1.007810831069946289e+00 1.300000000000000000e+01 1.000000000000000000e+00 8.769001007080078125e+00 1.035452880859375000e+03 9.575000000000000000e+01 5.125000000000000000e+01
6.000000000000000000e+01 4.064999999999999432e+02 1.004291534423828125e+02 -4.654449462890625000e+00 1.187674850225448608e-01 8.823529481887817383e-01 1.514679443359375000e+03 7.384995818138122559e-01 1.300000000000000000e+01 4.000000000000000000e+00 -7.498943847656250000e+03 1.006245178222656250e+03 9.625000000000000000e+01 5.125000000000000000e+01
6.800000000000000000e+01 4.083769230769229921e+02 1.038166427612304688e+02 -5.546508789062500000e+00 5.377629995346069336e-01 8.235294222831726074e-01 1.424956665039062500e+03 6.917226910591125488e-01 1.300000000000000000e+01 4.000000000000000000e+00 -1.000000000000000000e+04 1.503787353515625000e+03 9.675000000000000000e+01 5.125000000000000000e+01
6.800000000000000000e+01 4.387384615384614790e+02 1.073777465820312500e+02 -6.438598632812500000e+00 6.752655506134033203e-01 7.647058963775634766e-01 1.335233886718750000e+03 8.956754207611083984e-01 1.300000000000000000e+01 4.000000000000000000e+00 -1.000000000000000000e+04 1.420518554687500000e+03 9.725000000000000000e+01 5.125000000000000000e+01
3.000000000000000000e+00 3.908384615384614449e+02 1.306229705810546875e+02 -9.292480468750000000e+00 8.190568685531616211e-01 9.411764740943908691e-01 1.122417968750000000e+03 2.256656885147094727e+00 1.300000000000000000e+01 1.000000000000000000e+00 -1.000000000000000000e+04 1.703676147460937500e+03 9.925000000000000000e+01 5.125000000000000000e+01
1.300000000000000000e+01 3.909769230769230717e+02 1.393170928955078125e+02 -9.196838378906250000e+00 5.815082788467407227e-01 0.000000000000000000e+00 1.153562866210937500e+03 2.271987915039062500e+00 1.300000000000000000e+01 1.000000000000000000e+00 -7.502784179687500000e+03 1.621995239257812500e+03 9.975000000000000000e+01 5.125000000000000000e+01
3.300000000000000000e+01 5.799461538461539476e+02 1.602150573730468750e+02 -7.220642089843750000e+00 6.916593313217163086e-01 5.882352963089942932e-02 1.441337646484375000e+03 2.285672187805175781e+00 1.300000000000000000e+01 3.000000000000000000e+00 -2.506608886718750000e+03 1.828426391601562500e+03 1.017500000000000000e+02 5.125000000000000000e+01
1.000000000000000000e+01 7.032076923076921275e+02 1.741501312255859375e+02 -6.315063476562500000e+00 7.063109874725341797e-01 0.000000000000000000e+00 1.556545776367187500e+03 2.279654264450073242e+00 1.300000000000000000e+01 1.000000000000000000e+00 -1.000000000000000000e+04 1.912648071289062500e+03 1.022500000000000000e+02 5.125000000000000000e+01
3.900000000000000000e+01 7.907538461538466663e+02 2.204816131591796875e+02 -5.409454345703125000e+00 4.504609704017639160e-01 2.941176593303680420e-01 1.671753906250000000e+03 1.571019291877746582e+00 1.300000000000000000e+01 3.000000000000000000e+00 -7.498557617187500000e+03 1.589603149414062500e+03 1.027500000000000000e+02 5.125000000000000000e+01
1.400000000000000000e+01 8.904153846153844825e+02 2.891840820312500000e+02 -4.570251464843750000e+00 8.879687190055847168e-01 2.941176593303680420e-01 1.779226684570312500e+03 1.469597339630126953e+00 1.300000000000000000e+01 1.000000000000000000e+00 -1.000000000000000000e+04 1.905769775390625000e+03 1.032500000000000000e+02 5.125000000000000000e+01
6.000000000000000000e+00 9.044538461538458023e+02 3.172564697265625000e+02 -3.930297851562500000e+00 6.200247406959533691e-01 2.352941185235977173e-01 1.863493530273437500e+03 1.146367073059082031e+00 1.300000000000000000e+01 1.000000000000000000e+00 -1.000000000000000000e+04 1.760496826171875000e+03 1.037500000000000000e+02 5.125000000000000000e+01
1.100000000000000000e+01 7.858230769230768828e+02 2.975946350097656250e+02 -3.290344238281250000e+00 4.206232726573944092e-01 2.941176593303680420e-01 1.947760375976562500e+03 8.659070134162902832e-01 1.300000000000000000e+01 1.000000000000000000e+00 -1.000000000000000000e+04 1.675269897460937500e+03 1.042500000000000000e+02 5.125000000000000000e+01
2.700000000000000000e+01 6.975692307692308987e+02 2.849156188964843750e+02 -2.650390625000000000e+00 9.999999776482582092e-03 0.000000000000000000e+00 2.032027221679687500e+03 8.111782670021057129e-01 1.300000000000000000e+01 3.000000000000000000e+00 -1.000000000000000000e+04 1.167395874023437500e+03 1.047500000000000000e+02 5.125000000000000000e+01
2.200000000000000000e+01 6.480769230769227534e+02 2.693911132812500000e+02 -2.333374023437500000e+00 3.918662071228027344e-01 5.882352963089942932e-02 2.073624511718750000e+03 1.357373833656311035e+00 1.300000000000000000e+01 3.000000000000000000e+00 -7.495773437500000000e+03 1.670003662109375000e+03 1.052500000000000000e+02 5.125000000000000000e+01
5.800000000000000000e+01 5.623076923076922640e+02 2.113938446044921875e+02 -2.339233398437500000e+00 1.815850287675857544e-01 5.294117927551269531e-01 2.072551757812500000e+03 1.386893510818481445e+00 1.300000000000000000e+01 4.000000000000000000e+00 -4.990243164062500000e+03 9.582424926757812500e+02 1.057500000000000000e+02 5.125000000000000000e+01
3.600000000000000000e+01 4.711692307692308077e+02 1.469572143554687500e+02 -2.345092773437500000e+00 1.671469509601593018e-01 1.941176414489746094e+00 2.071479248046875000e+03 2.859802484512329102e+00 1.300000000000000000e+01 3.000000000000000000e+00 -4.986749511718750000e+03 9.933687744140625000e+02 1.062500000000000000e+02 5.125000000000000000e+01
2.400000000000000000e+01 4.106999999999997613e+02 1.131551895141601562e+02 -2.350982666015625000e+00 9.999999776482582092e-03 1.705882310867309570e+00 2.070406494140625000e+03 2.252718925476074219e+00 8.000000000000000000e+00 3.000000000000000000e+00 -1.000000000000000000e+04 7.189617919921875000e+02 1.067500000000000000e+02 5.125000000000000000e+01
2.600000000000000000e+01 3.711538461538460183e+02 1.197040634155273438e+02 -2.848999023437500000e+00 9.999999776482582092e-03 1.764705896377563477e+00 2.028859375000000000e+03 3.179431438446044922e+00 4.000000000000000000e+00 3.000000000000000000e+00 -1.000000000000000000e+04 8.677852783203125000e+02 1.072500000000000000e+02 5.125000000000000000e+01
4.000000000000000000e+00 3.691769230769230035e+02 1.357962341308593750e+02 -3.511047363281250000e+00 1.285590976476669312e-01 7.058823704719543457e-01 1.973820556640625000e+03 3.117119073867797852e+00 1.300000000000000000e+01 1.000000000000000000e+00 -7.503718750000000000e+03 7.938899536132812500e+02 1.077500000000000000e+02 5.125000000000000000e+01
2.800000000000000000e+01 3.853846153846153015e+02 1.608174896240234375e+02 -4.835174560546875000e+00 2.792116701602935791e-01 1.647058844566345215e+00 1.863743041992187500e+03 1.576869130134582520e+00 1.300000000000000000e+01 3.000000000000000000e+00 -1.711495590209960938e+01 9.506152343750000000e+02 1.087500000000000000e+02 5.125000000000000000e+01
6.500000000000000000e+01 3.945384615384615472e+02 1.634903259277343750e+02 -5.211730957031250000e+00 1.624734252691268921e-01 6.470588445663452148e-01 1.852062500000000000e+03 1.473986864089965820e+00 1.300000000000000000e+01 4.000000000000000000e+00 -1.000050000000000000e+04 9.119131469726562500e+02 1.092500000000000000e+02 5.125000000000000000e+01
6.100000000000000000e+01 4.049692307692307054e+02 1.628536224365234375e+02 -5.588256835937500000e+00 2.660194635391235352e-01 1.352941155433654785e+00 1.840381835937500000e+03 1.003806352615356445e+00 1.300000000000000000e+01 4.000000000000000000e+00 -2.491848632812500000e+03 1.012737976074218750e+03 1.097500000000000000e+02 5.125000000000000000e+01
3.200000000000000000e+01 4.068538461538463480e+02 1.693234252929687500e+02 -5.964782714843750000e+00 2.979587018489837646e-01 1.529411792755126953e+00 1.828701171875000000e+03 1.223662853240966797e+00 1.300000000000000000e+01 3.000000000000000000e+00 -1.000000000000000000e+04 1.047947509765625000e+03 1.102500000000000000e+02 5.125000000000000000e+01
6.900000000000000000e+01 4.007153846153847212e+02 1.679710998535156250e+02 -6.193115234375000000e+00 1.964216977357864380e-01 2.117647171020507812e+00 1.832723999023437500e+03 7.662058472633361816e-01 1.300000000000000000e+01 4.000000000000000000e+00 -7.506123535156250000e+03 9.478109741210937500e+02 1.107500000000000000e+02 5.125000000000000000e+01
5.900000000000000000e+01 3.838076923076924913e+02 1.542586669921875000e+02 -5.976867675781250000e+00 3.111229240894317627e-01 2.352941274642944336e+00 1.883857299804687500e+03 7.542212009429931641e-01 1.300000000000000000e+01 4.000000000000000000e+00 -1.000000000000000000e+04 1.141766235351562500e+03 1.112500000000000000e+02 5.125000000000000000e+01
2.400000000000000000e+01 3.660307692307690672e+02 1.419019165039062500e+02 -5.760650634765625000e+00 2.855178415775299072e-01 1.647058844566345215e+00 1.934990600585937500e+03 1.556596875190734863e+00 1.300000000000000000e+01 3.000000000000000000e+00 -1.000000000000000000e+04 1.171261474609375000e+03 1.117500000000000000e+02 5.125000000000000000e+01
1.400000000000000000e+01 3.398615384615383732e+02 1.364647216796875000e+02 -5.182312011718750000e+00 2.860769033432006836e-01 2.411764621734619141e+00 2.054605224609375000e+03 1.817172408103942871e+00 1.300000000000000000e+01 1.000000000000000000e+00 -5.020302246093750000e+03 1.016773071289062500e+03 1.127500000000000000e+02 5.125000000000000000e+01
2.500000000000000000e+01 3.248307692307691923e+02 1.401064605712890625e+02 -4.674407958984375000e+00 1.828077286481857300e-01 1.882352948188781738e+00 2.140434570312500000e+03 1.845375657081604004e+00 1.300000000000000000e+01 3.000000000000000000e+00 -1.000000000000000000e+04 8.661132202148437500e+02 1.132500000000000000e+02 5.125000000000000000e+01
2.300000000000000000e+01 3.219615384615384528e+02 1.398932647705078125e+02 -4.166503906250000000e+00 1.613391488790512085e-01 2.352941274642944336e+00 2.226263671875000000e+03 1.883942127227783203e+00 1.300000000000000000e+01 3.000000000000000000e+00 -1.000000000000000000e+04 8.983314819335937500e+02 1.137500000000000000e+02 5.125000000000000000e+01
1.900000000000000000e+01 3.207769230769229694e+02 1.348115997314453125e+02 -3.658599853515625000e+00 1.837021261453628540e-01 2.647058725357055664e+00 2.312093017578125000e+03 2.103748321533203125e+00 1.300000000000000000e+01 1.000000000000000000e+00 -2.490846679687500000e+03 9.181990356445312500e+02 1.142500000000000000e+02 5.125000000000000000e+01
2.000000000000000000e+00 3.186538461538461320e+02 1.291666717529296875e+02 -3.147094726562500000e+00 1.177706718444824219e-01 9.411764740943908691e-01 2.405252685546875000e+03 2.388295412063598633e+00 4.000000000000000000e+00 1.000000000000000000e+00 -1.000000000000000000e+04 7.333033447265625000e+02 1.152500000000000000e+02 5.125000000000000000e+01
6.000000000000000000e+00 3.158846153846153015e+02 1.288314208984375000e+02 -2.927368164062500000e+00 1.412146240472793579e-01 1.647058844566345215e+00 2.446225341796875000e+03 3.118342876434326172e+00 4.000000000000000000e+00 1.000000000000000000e+00 -1.000000000000000000e+04 6.481276855468750000e+02 1.157500000000000000e+02 5.125000000000000000e+01
3.100000000000000000e+01 3.350461538461540272e+02 1.476287078857421875e+02 -2.928100585937500000e+00 5.295239090919494629e-01 1.705882310867309570e+00 2.463031250000000000e+03 2.078099489212036133e+00 5.000000000000000000e+00 3.000000000000000000e+00 -1.000000000000000000e+04 1.108633911132812500e+03 1.167500000000000000e+02 5.125000000000000000e+01
2.600000000000000000e+01 3.428461538461537543e+02 1.585425567626953125e+02 -3.148529052734375000e+00 4.619493782520294189e-01 2.058823585510253906e+00 2.438864257812500000e+03 9.154035449028015137e-01 1.300000000000000000e+01 3.000000000000000000e+00 -1.000000000000000000e+04 1.028536743164062500e+03 1.172500000000000000e+02 5.125000000000000000e+01
5.500000000000000000e+01 3.484230769230768487e+02 1.662271881103515625e+02 -3.368957519531250000e+00 5.508727431297302246e-01 1.529411792755126953e+00 2.414697265625000000e+03 9.516850709915161133e-01 1.300000000000000000e+01 4.000000000000000000e+00 -4.995782226562500000e+03 1.096611328125000000e+03 1.177500000000000000e+02 5.125000000000000000e+01
9.000000000000000000e+00 3.493230769230766555e+02 1.671786346435546875e+02 -3.629516601562500000e+00 2.194320857524871826e-01 2.176470518112182617e+00 2.386783691406250000e+03 1.119189620018005371e+00 1.300000000000000000e+01 1.000000000000000000e+00 8.975679397583007812e+00 7.698884277343750000e+02 1.182500000000000000e+02 5.125000000000000000e+01
5.700000000000000000e+01 3.598076923076920366e+02 1.663066406250000000e+02 -4.010528564453125000e+00 4.570082426071166992e-01 1.294117689132690430e+00 2.347630859375000000e+03 8.423265218734741211e-01 1.300000000000000000e+01 4.000000000000000000e+00 -1.000000000000000000e+04 9.610789794921875000e+02 1.187500000000000000e+02 5.125000000000000000e+01
9.000000000000000000e+00 3.618692307692308532e+02 1.741143188476562500e+02 -4.391510009765625000e+00 1.861780136823654175e-01 2.058823585510253906e+00 2.308477783203125000e+03 1.165942430496215820e+00 1.300000000000000000e+01 1.000000000000000000e+00 -7.499078613281250000e+03 6.780255737304687500e+02 1.192500000000000000e+02 5.125000000000000000e+01
5.800000000000000000e+01 3.946384615384616268e+02 1.878358154296875000e+02 -4.975585937500000000e+00 2.593333423137664795e-01 3.529411852359771729e-01 2.249407470703125000e+03 7.612868547439575195e-01 6.000000000000000000e+00 4.000000000000000000e+00 -1.000000000000000000e+04 7.534154663085937500e+02 1.202500000000000000e+02 5.125000000000000000e+01
4.200000000000000000e+01 4.309307692307692150e+02 1.962873077392578125e+02 -5.025878906250000000e+00 4.348245561122894287e-01 0.000000000000000000e+00 2.248044189453125000e+03 1.045330882072448730e+00 1.300000000000000000e+01 3.000000000000000000e+00 -4.997038574218750000e+03 9.330894775390625000e+02 1.212500000000000000e+02 5.125000000000000000e+01
1.500000000000000000e+01 4.393923076923077247e+02 1.991737365722656250e+02 -5.051025390625000000e+00 5.143293738365173340e-01 2.941176593303680420e-01 2.247362792968750000e+03 2.079277276992797852e+00 1.300000000000000000e+01 1.000000000000000000e+00 -4.980369140625000000e+03 1.027692016601562500e+03 1.217500000000000000e+02 5.125000000000000000e+01
5.600000000000000000e+01 4.615846153846155744e+02 2.028874053955078125e+02 -4.834106445312500000e+00 7.659977078437805176e-01 0.000000000000000000e+00 2.278072753906250000e+03 1.471281290054321289e+00 1.300000000000000000e+01 4.000000000000000000e+00 7.447143077850341797e+00 1.090006835937500000e+03 1.222500000000000000e+02 5.125000000000000000e+01
5.100000000000000000e+01 4.728384615384615586e+02 2.053149414062500000e+02 -4.536499023437500000e+00 5.440986156463623047e-01 0.000000000000000000e+00 2.319246582031250000e+03 1.457376718521118164e+00 1.300000000000000000e+01 4.000000000000000000e+00 -7.497161621093750000e+03 8.154194335937500000e+02 1.227500000000000000e+02 5.125000000000000000e+01
4.500000000000000000e+01 4.761307692307693742e+02 2.134884033203125000e+02 -4.238891601562500000e+00 5.780808925628662109e-01 5.882353186607360840e-01 2.360420410156250000e+03 1.139763116836547852e+00 1.300000000000000000e+01 4.000000000000000000e+00 -1.000000000000000000e+04 9.614555053710937500e+02 1.232500000000000000e+02 5.125000000000000000e+01
4.700000000000000000e+01 4.932000000000001592e+02 2.149571838378906250e+02 -3.941284179687500000e+00 3.735125660896301270e-01 5.882353186607360840e-01 2.401594238281250000e+03 7.494405508041381836e-01 1.300000000000000000e+01 4.000000000000000000e+00 -1.000000000000000000e+04 7.666165771484375000e+02 1.237500000000000000e+02 5.125000000000000000e+01
5.000000000000000000e+01 4.883461538461539249e+02 2.108822937011718750e+02 -3.602325439453125000e+00 3.286939859390258789e-01 0.000000000000000000e+00 2.446145019531250000e+03 7.673658132553100586e-01 1.300000000000000000e+01 4.000000000000000000e+00 -1.000000000000000000e+04 7.014639282226562500e+02 1.242500000000000000e+02 5.125000000000000000e+01
1.800000000000000000e+01 4.780384615384615472e+02 2.022088317871093750e+02 -3.263336181640625000e+00 2.578332126140594482e-01 1.235294103622436523e+00 2.490695556640625000e+03 7.852656841278076172e-01 1.300000000000000000e+01 1.000000000000000000e+00 1.548474502563476562e+01 5.564312744140625000e+02 1.247500000000000000e+02 5.125000000000000000e+01
3.700000000000000000e+01 4.729923076923078042e+02 2.000290679931640625e+02 -2.924377441406250000e+00 1.713085770606994629e-01 1.470588207244873047e+00 2.535246337890625000e+03 8.072464466094970703e-01 1.300000000000000000e+01 3.000000000000000000e+00 -7.496133300781250000e+03 4.307574768066406250e+02 1.252500000000000000e+02 5.125000000000000000e+01
4.300000000000000000e+01 4.747538461538463821e+02 2.033738861083984375e+02 -2.652221679687500000e+00 1.396148651838302612e-01 9.411764740943908691e-01 2.569419433593750000e+03 8.267645239830017090e-01 1.300000000000000000e+01 3.000000000000000000e+00 -4.991395996093750000e+03 3.963483276367187500e+02 1.257500000000000000e+02 5.125000000000000000e+01
3.400000000000000000e+01 4.781538461538459615e+02 2.063075714111328125e+02 -2.580474853515625000e+00 1.464825272560119629e-01 1.176470637321472168e+00 2.572459960937500000e+03 8.437649011611938477e-01 1.300000000000000000e+01 3.000000000000000000e+00 -1.000000000000000000e+04 4.328235168457031250e+02 1.262500000000000000e+02 5.125000000000000000e+01
3.900000000000000000e+01 4.803307692307693628e+02 2.066650848388671875e+02 -2.508758544921875000e+00 9.999999776482582092e-03 8.823529481887817383e-01 2.575500488281250000e+03 8.699050545692443848e-01 1.300000000000000000e+01 3.000000000000000000e+00 -2.485790527343750000e+03 2.540669250488281250e+02 1.267500000000000000e+02 5.125000000000000000e+01
1.400000000000000000e+01 5.789461538461538339e+02 2.308822174072265625e+02 -2.841552734375000000e+00 9.999999776482582092e-03 1.764705896377563477e+00 2.512511718750000000e+03 1.804879426956176758e+00 8.000000000000000000e+00 1.000000000000000000e+00 -7.496460937500000000e+03 1.465173034667968750e+02 1.282500000000000000e+02 5.125000000000000000e+01
2.500000000000000000e+01 6.127615384615381799e+02 2.410746917724609375e+02 -3.428710937500000000e+00 1.111032888293266296e-01 1.352941155433654785e+00 2.422446044921875000e+03 1.401335477828979492e+00 6.000000000000000000e+00 3.000000000000000000e+00 -4.995729980468750000e+03 2.385034790039062500e+02 1.292500000000000000e+02 5.125000000000000000e+01
4.500000000000000000e+01 5.920307692307690104e+02 2.410925903320312500e+02 -3.802429199218750000e+00 1.212949156761169434e-01 9.411764740943908691e-01 2.364013427734375000e+03 1.760716915130615234e+00 5.000000000000000000e+00 4.000000000000000000e+00 5.909385681152343750e+00 2.242203674316406250e+02 1.297500000000000000e+02 5.125000000000000000e+01
2.700000000000000000e+01 5.901692307692309214e+02 2.424479980468750000e+02 -4.202819824218750000e+00 1.180654689669609070e-01 1.000000000000000000e+00 2.301114257812500000e+03 1.755303263664245605e+00 5.000000000000000000e+00 3.000000000000000000e+00 1.360528373718261719e+01 2.542053680419921875e+02 1.302500000000000000e+02 5.125000000000000000e+01
5.200000000000000000e+01 6.121923076923075087e+02 2.411468353271484375e+02 -4.603210449218750000e+00 1.544277369976043701e-01 1.000000000000000000e+00 2.238215087890625000e+03 8.462231159210205078e-01 1.300000000000000000e+01 4.000000000000000000e+00 1.184933090209960938e+01 4.117435302734375000e+02 1.307500000000000000e+02 5.125000000000000000e+01
6.600000000000000000e+01 6.366153846153848690e+02 2.407531585693359375e+02 -5.003631591796875000e+00 5.888076424598693848e-01 0.000000000000000000e+00 2.175315917968750000e+03 9.984279870986938477e-01 1.300000000000000000e+01 4.000000000000000000e+00 -2.495215332031250000e+03 7.347238769531250000e+02 1.312500000000000000e+02 5.125000000000000000e+01
6.200000000000000000e+01 6.582615384615382936e+02 2.432358703613281250e+02 -5.287628173828125000e+00 4.902884364128112793e-01 6.470588445663452148e-01 2.129092285156250000e+03 9.283095002174377441e-01 1.300000000000000000e+01 4.000000000000000000e+00 -2.494251953125000000e+03 7.292231445312500000e+02 1.317500000000000000e+02 5.125000000000000000e+01
4.100000000000000000e+01 6.686230769230771784e+02 2.544666748046875000e+02 -5.571655273437500000e+00 3.163025081157684326e-01 7.058823704719543457e-01 2.082868652343750000e+03 7.960895299911499023e-01 1.300000000000000000e+01 3.000000000000000000e+00 5.083858108520507812e+01 6.144934082031250000e+02 1.322500000000000000e+02 5.125000000000000000e+01
1.800000000000000000e+01 6.589846153846153811e+02 2.821945190429687500e+02 -5.855651855468750000e+00 2.744459211826324463e-01 1.529411792755126953e+00 2.036645019531250000e+03 8.181840777397155762e-01 1.300000000000000000e+01 1.000000000000000000e+00 -1.000000000000000000e+04 4.198590087890625000e+02 1.327500000000000000e+02 5.125000000000000000e+01
6.400000000000000000e+01 6.696230769230769511e+02 3.087807312011718750e+02 -6.090454101562500000e+00 5.285382866859436035e-01 5.294117927551269531e-01 1.993669799804687500e+03 7.789760828018188477e-01 1.500000000000000000e+01 4.000000000000000000e+00 -4.995099609375000000e+03 6.078588867187500000e+02 1.332500000000000000e+02 5.125000000000000000e+01
4.600000000000000000e+01 6.952846153846151083e+02 3.165477905273437500e+02 -6.177612304687500000e+00 7.946829795837402344e-01 1.764705926179885864e-01 1.960439575195312500e+03 1.383351325988769531e+00 1.300000000000000000e+01 4.000000000000000000e+00 -2.494716308593750000e+03 1.045996459960937500e+03 1.337500000000000000e+02 5.125000000000000000e+01
1.100000000000000000e+01 6.888230769230768828e+02 3.052090759277343750e+02 -6.264770507812500000e+00 9.346061944961547852e-01 2.941176593303680420e-01 1.927209350585937500e+03 1.625048041343688965e+00 1.300000000000000000e+01 1.000000000000000000e+00 1.888863372802734375e+01 1.473925170898437500e+03 1.342500000000000000e+02 5.125000000000000000e+01
6.200000000000000000e+01 6.587153846153844370e+02 2.867441406250000000e+02 -6.351928710937500000e+00 2.477026134729385376e-01 5.882353186607360840e-01 1.893979125976562500e+03 1.082416653633117676e+00 1.500000000000000000e+01 4.000000000000000000e+00 -1.000000000000000000e+04 3.540171508789062500e+02 1.347500000000000000e+02 5.125000000000000000e+01
2.000000000000000000e+01 6.405846153846151765e+02 2.795712890625000000e+02 -6.243530273437500000e+00 2.803852856159210205e-01 2.352941185235977173e-01 1.891276367187500000e+03 1.377029657363891602e+00 1.300000000000000000e+01 3.000000000000000000e+00 2.745311737060546875e+01 5.380675659179687500e+02 1.352500000000000000e+02 5.125000000000000000e+01
3.300000000000000000e+01 6.243076923076924913e+02 2.818277282714843750e+02 -5.939605712890625000e+00 1.691821515560150146e-01 0.000000000000000000e+00 1.919100952148437500e+03 1.530595779418945312e+00 1.300000000000000000e+01 3.000000000000000000e+00 -7.497396972656250000e+03 3.240448913574218750e+02 1.357500000000000000e+02 5.125000000000000000e+01
3.800000000000000000e+01 5.949999999999998863e+02 2.594788513183593750e+02 -5.635681152343750000e+00 1.128413826227188110e-01 4.705882370471954346e-01 1.946925659179687500e+03 1.552501797676086426e+00 1.500000000000000000e+01 3.000000000000000000e+00 -4.993239746093750000e+03 2.555354156494140625e+02 1.362500000000000000e+02 5.125000000000000000e+01
6.300000000000000000e+01 6.197076923076922412e+02 2.279098205566406250e+02 -4.953277587890625000e+00 1.286321282386779785e-01 5.882352963089942932e-02 1.992667846679687500e+03 1.613853216171264648e+00 1.500000000000000000e+01 4.000000000000000000e+00 1.477952289581298828e+01 1.748990783691406250e+02 1.372500000000000000e+02 5.125000000000000000e+01
6.300000000000000000e+01 6.858307692307688512e+02 2.192659149169921875e+02 -4.549926757812500000e+00 2.140548676252365112e-01 5.882352963089942932e-02 2.007282958984375000e+03 1.331252932548522949e+00 1.300000000000000000e+01 4.000000000000000000e+00 1.089890098571777344e+01 4.105921325683593750e+02 1.377500000000000000e+02 5.125000000000000000e+01
5.500000000000000000e+01 6.999769230769234127e+02 2.283747558593750000e+02 -4.146575927734375000e+00 1.431615501642227173e-01 5.882352963089942932e-02 2.021898071289062500e+03 1.376882076263427734e+00 1.300000000000000000e+01 4.000000000000000000e+00 2.443085289001464844e+01 3.052067565917968750e+02 1.382500000000000000e+02 5.125000000000000000e+01
4.700000000000000000e+01 6.985230769230768146e+02 2.510922546386718750e+02 -3.743225097656250000e+00 9.999999776482582092e-03 0.000000000000000000e+00 2.036513183593750000e+03 1.015429019927978516e+00 1.300000000000000000e+01 4.000000000000000000e+00 -1.000300000000000000e+04 2.599325180053710938e+01 1.387500000000000000e+02 5.125000000000000000e+01
5.100000000000000000e+01 6.925000000000002274e+02 2.742197570800781250e+02 -3.326965332031250000e+00 9.999999776482582092e-03 1.000000000000000000e+00 1.984853271484375000e+03 1.603498816490173340e+00 1.300000000000000000e+01 4.000000000000000000e+00 -1.000000000000000000e+04 2.056475677490234375e+02 1.392500000000000000e+02 5.125000000000000000e+01
1.100000000000000000e+01 6.867461538461539021e+02 2.925865478515625000e+02 -2.910675048828125000e+00 1.136187911033630371e-01 6.470588445663452148e-01 1.933193359375000000e+03 7.548023462295532227e-01 1.300000000000000000e+01 1.000000000000000000e+00 3.850217819213867188e+01 3.523974914550781250e+02 1.397500000000000000e+02 5.125000000000000000e+01
1.300000000000000000e+01 6.712384615384614790e+02 3.131153564453125000e+02 -2.494415283203125000e+00 9.999999776482582092e-03 0.000000000000000000e+00 1.881533325195312500e+03 1.350997209548950195e+00 3.000000000000000000e+00 1.000000000000000000e+00 6.438024139404296875e+01 1.543976898193359375e+02 1.402500000000000000e+02 5.125000000000000000e+01
5.000000000000000000e+01 7.213923076923075541e+02 4.149384765625000000e+02 -9.257202148437500000e-01 9.999999776482582092e-03 2.941176593303680420e-01 1.956550415039062500e+03 9.757761955261230469e-01 1.300000000000000000e+01 4.000000000000000000e+00 -2.481629638671875000e+03 9.905254364013671875e+01 1.427500000000000000e+02 5.125000000000000000e+01
1.000000000000000000e+00 2.669153846153846530e+02 1.641526641845703125e+02 1.852386474609375000e+00 0.000000000000000000e+00 2.529411792755126953e+00 3.017507568359375000e+03 3.609726428985595703e+00 6.000000000000000000e+00 1.000000000000000000e+00 -1.000000000000000000e+04 2.761568603515625000e+02 6.875000000000000000e+01 5.175000000000000000e+01
0.000000000000000000e+00 2.863923076923076678e+02 1.710815277099609375e+02 1.633117675781250000e+00 0.000000000000000000e+00 2.823529481887817383e+00 2.963355224609375000e+03 3.612237453460693359e+00 3.000000000000000000e+00 1.000000000000000000e+00 -1.000000000000000000e+04 2.901663208007812500e+02 6.975000000000000000e+01 5.175000000000000000e+01
2.000000000000000000e+00 2.993153846153848008e+02 1.766753540039062500e+02 1.559936523437500000e+00 0.000000000000000000e+00 2.176470518112182617e+00 2.946538330078125000e+03 3.585602045059204102e+00 3.000000000000000000e+00 1.000000000000000000e+00 -1.000000000000000000e+04 3.052590332031250000e+02 7.025000000000000000e+01 5.175000000000000000e+01
1.000000000000000000e+00 3.183615384615385437e+02 1.893323516845703125e+02 1.413635253906250000e+00 0.000000000000000000e+00 1.235294103622436523e+00 2.912905029296875000e+03 3.565350532531738281e+00 3.000000000000000000e+00 1.000000000000000000e+00 -1.000000000000000000e+04 4.134083251953125000e+02 7.125000000000000000e+01 5.175000000000000000e+01
0.000000000000000000e+00 3.250846153846152902e+02 1.940254211425781250e+02 1.377624511718750000e+00 0.000000000000000000e+00 3.000000000000000000e+00 2.910736572265625000e+03 3.576501131057739258e+00 3.000000000000000000e+00 1.000000000000000000e+00 -1.000000000000000000e+04 3.231649475097656250e+02 7.175000000000000000e+01 5.175000000000000000e+01
0.000000000000000000e+00 3.278076923076921503e+02 2.133344573974609375e+02 1.305603027343750000e+00 0.000000000000000000e+00 2.705882310867309570e+00 2.906399902343750000e+03 3.573769092559814453e+00 4.000000000000000000e+00 1.000000000000000000e+00 -1.000000000000000000e+04 2.808335876464843750e+02 7.275000000000000000e+01 5.175000000000000000e+01
2.000000000000000000e+00 3.321692307692307509e+02 2.189272003173828125e+02 1.278106689453125000e+00 0.000000000000000000e+00 1.941176414489746094e+00 2.907766601562500000e+03 3.567909717559814453e+00 4.000000000000000000e+00 1.000000000000000000e+00 -1.000000000000000000e+04 3.813604125976562500e+02 7.325000000000000000e+01 5.175000000000000000e+01
4.000000000000000000e+00 3.270769230769231513e+02 2.187387695312500000e+02 1.276062011718750000e+00 0.000000000000000000e+00 2.176470518112182617e+00 2.919737792968750000e+03 3.594764232635498047e+00 4.000000000000000000e+00 1.000000000000000000e+00 -1.000000000000000000e+04 2.719046325683593750e+02 7.375000000000000000e+01 5.175000000000000000e+01
1.000000000000000000e+00 3.116615384615384414e+02 2.094646911621093750e+02 1.274017333984375000e+00 0.000000000000000000e+00 1.823529362678527832e+00 2.931709228515625000e+03 3.603274345397949219e+00 4.000000000000000000e+00 1.000000000000000000e+00 -1.000000000000000000e+04 2.785978698730468750e+02 7.425000000000000000e+01 5.175000000000000000e+01
2.000000000000000000e+00 3.019846153846155516e+02 1.892981719970703125e+02 1.272003173828125000e+00 0.000000000000000000e+00 2.117647171020507812e+00 2.943680419921875000e+03 3.615923643112182617e+00 4.000000000000000000e+00 1.000000000000000000e+00 -7.501939941406250000e+03 2.351944732666015625e+02 7.475000000000000000e+01 5.175000000000000000e+01
3.000000000000000000e+00 2.760076923076922526e+02 1.517389068603515625e+02 1.304840087890625000e+00 0.000000000000000000e+00 1.647058844566345215e+00 2.972579101562500000e+03 3.682609081268310547e+00 4.000000000000000000e+00 1.000000000000000000e+00 -2.510236816406250000e+03 1.693652648925781250e+02 7.575000000000000000e+01 5.175000000000000000e+01
0.000000000000000000e+00 2.683000000000000114e+02 1.498313751220703125e+02 1.327392578125000000e+00 0.000000000000000000e+00 1.411764740943908691e+00 2.987854492187500000e+03 3.692249774932861328e+00 4.000000000000000000e+00 1.000000000000000000e+00 -1.000000000000000000e+04 1.295467224121093750e+02 7.625000000000000000e+01 5.175000000000000000e+01
1.000000000000000000e+00 2.613846153846153015e+02 1.487477111816406250e+02 1.349975585937500000e+00 0.000000000000000000e+00 2.058823585510253906e+00 3.003129638671875000e+03 3.694028615951538086e+00 4.000000000000000000e+00 1.000000000000000000e+00 -5.007773925781250000e+03 1.339822082519531250e+02 7.675000000000000000e+01 5.175000000000000000e+01
0.000000000000000000e+00 2.565384615384614904e+02 1.453515014648437500e+02 1.399841308593750000e+00 0.000000000000000000e+00 2.352941274642944336e+00 3.013540283203125000e+03 3.693346738815307617e+00 4.000000000000000000e+00 1.000000000000000000e+00 -7.502978027343750000e+03 1.292714080810546875e+02 7.725000000000000000e+01 5.175000000000000000e+01
0.000000000000000000e+00 2.647461538461538453e+02 1.410720672607421875e+02 1.458770751953125000e+00 0.000000000000000000e+00 1.764705896377563477e+00 3.022329589843750000e+03 3.686380624771118164e+00 4.000000000000000000e+00 1.000000000000000000e+00 -1.000000000000000000e+04 1.423570251464843750e+02 7.775000000000000000e+01 5.175000000000000000e+01
0.000000000000000000e+00 2.653384615384615017e+02 1.395123596191406250e+02 1.517730712890625000e+00 0.000000000000000000e+00 1.588235259056091309e+00 3.031118652343750000e+03 3.682922124862670898e+00 4.000000000000000000e+00 1.000000000000000000e+00 -1.000000000000000000e+04 1.651462249755859375e+02 7.825000000000000000e+01 5.175000000000000000e+01
1.200000000000000000e+01 2.754769230769229580e+02 1.441084442138671875e+02 1.576690673828125000e+00 0.000000000000000000e+00 1.470588207244873047e+00 3.039907714843750000e+03 3.379204273223876953e+00 4.000000000000000000e+00 1.000000000000000000e+00 -7.495881347656250000e+03 1.610600585937500000e+02 7.875000000000000000e+01 5.175000000000000000e+01
3.600000000000000000e+01 2.872000000000000455e+02 1.540337982177734375e+02 1.639556884765625000e+00 0.000000000000000000e+00 2.352941185235977173e-01 3.013465820312500000e+03 2.600736856460571289e+00 4.000000000000000000e+00 3.000000000000000000e+00 -2.481272705078125000e+03 1.574525604248046875e+02 7.925000000000000000e+01 5.175000000000000000e+01
7.000000000000000000e+00 3.126307692307692605e+02 1.690845642089843750e+02 1.702453613281250000e+00 0.000000000000000000e+00 9.411764740943908691e-01 2.987023681640625000e+03 3.114219188690185547e+00 4.000000000000000000e+00 1.000000000000000000e+00 -7.496556640625000000e+03 1.583428802490234375e+02 7.975000000000000000e+01 5.175000000000000000e+01
2.500000000000000000e+01 3.457000000000001023e+02 1.843672790527343750e+02 1.765350341796875000e+00 0.000000000000000000e+00 8.823529481887817383e-01 2.960581542968750000e+03 3.132200717926025391e+00 4.000000000000000000e+00 3.000000000000000000e+00 -1.000000000000000000e+04 1.894695587158203125e+02 8.025000000000000000e+01 5.175000000000000000e+01
2.300000000000000000e+01 3.813692307692306258e+02 1.880162200927734375e+02 1.776947021484375000e+00 0.000000000000000000e+00 5.882352963089942932e-02 2.920202148437500000e+03 2.836370706558227539e+00 4.000000000000000000e+00 3.000000000000000000e+00 -1.000300000000000000e+04 2.279155273437500000e+02 8.075000000000000000e+01 5.175000000000000000e+01
6.000000000000000000e+00 5.600615384615385892e+02 2.531095733642578125e+02 5.447082519531250000e-01 0.000000000000000000e+00 2.000000000000000000e+00 2.419870849609375000e+03 2.996217250823974609e+00 4.000000000000000000e+00 1.000000000000000000e+00 -1.000000000000000000e+04 3.896643371582031250e+02 8.325000000000000000e+01 5.175000000000000000e+01
6.700000000000000000e+01 5.740461538461540840e+02 2.519057922363281250e+02 5.505371093750000000e-02 9.999999776482582092e-03 2.176470518112182617e+00 2.278096679687500000e+03 1.007004261016845703e+00 1.300000000000000000e+01 4.000000000000000000e+00 -1.000000000000000000e+04 7.511951904296875000e+02 8.375000000000000000e+01 5.175000000000000000e+01
1.000000000000000000e+01 5.548384615384616154e+02 2.591352844238281250e+02 -1.138977050781250000e+00 0.000000000000000000e+00 1.470588207244873047e+00 2.008580200195312500e+03 9.323931336402893066e-01 1.300000000000000000e+01 1.000000000000000000e+00 -7.500738281250000000e+03 6.721376342773437500e+02 8.475000000000000000e+01 5.175000000000000000e+01
6.400000000000000000e+01 5.399846153846153811e+02 2.573569946289062500e+02 -1.914916992187500000e+00 9.999999776482582092e-03 2.941176593303680420e-01 1.885515380859375000e+03 8.296046853065490723e-01 1.300000000000000000e+01 4.000000000000000000e+00 -5.001507812500000000e+03 8.752377929687500000e+02 8.525000000000000000e+01 5.175000000000000000e+01
4.800000000000000000e+01 5.236384615384615699e+02 2.622354431152343750e+02 -2.690887451171875000e+00 9.999999776482582092e-03 4.705882370471954346e-01 1.762450439453125000e+03 8.049219250679016113e-01 8.000000000000000000e+00 4.000000000000000000e+00 -7.501489257812500000e+03 5.625510253906250000e+02 8.575000000000000000e+01 5.175000000000000000e+01
6.400000000000000000e+01 5.056538461538461320e+02 2.772177734375000000e+02 -3.466827392578125000e+00 9.999999776482582092e-03 0.000000000000000000e+00 1.639385620117187500e+03 8.165985345840454102e-01 1.300000000000000000e+01 4.000000000000000000e+00 -1.000000000000000000e+04 8.069033203125000000e+02 8.625000000000000000e+01 5.175000000000000000e+01
3.500000000000000000e+01 4.935999999999999659e+02 3.129428100585937500e+02 -4.127716064453125000e+00 0.000000000000000000e+00 0.000000000000000000e+00 1.564639038085937500e+03 8.176623582839965820e-01 1.300000000000000000e+01 3.000000000000000000e+00 -5.002638671875000000e+03 5.525800781250000000e+02 8.675000000000000000e+01 5.175000000000000000e+01
5.500000000000000000e+01 4.928999999999998636e+02 3.332443847656250000e+02 -4.788574218750000000e+00 0.000000000000000000e+00 0.000000000000000000e+00 1.489892578125000000e+03 8.073441982269287109e-01 1.300000000000000000e+01 4.000000000000000000e+00 -1.000000000000000000e+04 7.498973999023437500e+02 8.725000000000000000e+01 5.175000000000000000e+01
6.100000000000000000e+01 4.972307692307691696e+02 3.362489929199218750e+02 -5.449432373046875000e+00 1.849697828292846680e-01 0.000000000000000000e+00 1.415145996093750000e+03 1.202868819236755371e+00 1.300000000000000000e+01 4.000000000000000000e+00 -1.000000000000000000e+04 1.033928466796875000e+03 8.775000000000000000e+01 5.175000000000000000e+01
1.200000000000000000e+01 5.034846153846152674e+02 3.261928710937500000e+02 -5.969421386718750000e+00 7.462147474288940430e-01 0.000000000000000000e+00 1.359687744140625000e+03 1.542533159255981445e+00 1.300000000000000000e+01 1.000000000000000000e+00 -1.000000000000000000e+04 1.471941528320312500e+03 8.825000000000000000e+01 5.175000000000000000e+01
1.700000000000000000e+01 5.149076923076922867e+02 3.018760681152343750e+02 -6.066772460937500000e+00 6.896453499794006348e-01 0.000000000000000000e+00 1.362094116210937500e+03 1.838153600692749023e+00 1.300000000000000000e+01 1.000000000000000000e+00 -1.000000000000000000e+04 1.665563354492187500e+03 8.875000000000000000e+01 5.175000000000000000e+01
2.600000000000000000e+01 4.896615384615384414e+02 1.624661407470703125e+02 -5.021728515625000000e+00 7.932102680206298828e-01 2.941176593303680420e-01 1.511280761718750000e+03 2.236550331115722656e+00 1.300000000000000000e+01 3.000000000000000000e+00 -1.000000000000000000e+04 1.583727905273437500e+03 9.125000000000000000e+01 5.175000000000000000e+01
2.900000000000000000e+01 4.910692307692307850e+02 1.542357330322265625e+02 -4.506378173828125000e+00 4.340375363826751709e-01 2.352941185235977173e-01 1.568549072265625000e+03 2.307382106781005859e+00 1.300000000000000000e+01 3.000000000000000000e+00 -5.005900878906250000e+03 1.383427978515625000e+03 9.175000000000000000e+01 5.175000000000000000e+01
3.900000000000000000e+01 5.885846153846154039e+02 1.537599945068359375e+02 -4.187164306640625000e+00 5.922490954399108887e-01 3.529411852359771729e-01 1.595689453125000000e+03 2.213099002838134766e+00 1.300000000000000000e+01 3.000000000000000000e+00 -7.503510742187500000e+03 1.269593383789062500e+03 9.225000000000000000e+01 5.175000000000000000e+01
2.800000000000000000e+01 6.843692307692309669e+02 1.579441680908203125e+02 -3.933349609375000000e+00 7.345418930053710938e-01 3.529411852359771729e-01 1.612787231445312500e+03 2.118416547775268555e+00 1.300000000000000000e+01 3.000000000000000000e+00 -1.000000000000000000e+04 1.483686279296875000e+03 9.275000000000000000e+01 5.175000000000000000e+01
4.700000000000000000e+01 6.762461538461537884e+02 1.494376373291015625e+02 -3.679504394531250000e+00 4.930472671985626221e-01 9.411764740943908691e-01 1.629885131835937500e+03 2.170402765274047852e+00 4.000000000000000000e+00 4.000000000000000000e+00 -4.994257324218750000e+03 1.558729248046875000e+03 9.325000000000000000e+01 5.175000000000000000e+01
3.400000000000000000e+01 6.690461538461538566e+02 1.287986297607421875e+02 -3.425659179687500000e+00 3.861007392406463623e-01 1.176470637321472168e+00 1.646982910156250000e+03 2.937295198440551758e+00 4.000000000000000000e+00 3.000000000000000000e+00 -1.000000000000000000e+04 1.457522216796875000e+03 9.375000000000000000e+01 5.175000000000000000e+01
2.000000000000000000e+00 6.217846153846155630e+02 1.128390274047851562e+02 -3.608734130859375000e+00 9.999999776482582092e-03 1.000000000000000000e+00 1.626227661132812500e+03 3.093134164810180664e+00 1.300000000000000000e+01 1.000000000000000000e+00 -7.496369140625000000e+03 8.557717285156250000e+02 9.425000000000000000e+01 5.175000000000000000e+01
2.600000000000000000e+01 5.894153846153848235e+02 1.128629150390625000e+02 -3.791809082031250000e+00 3.113014698028564453e-01 5.294117927551269531e-01 1.605472412109375000e+03 3.000001907348632812e+00 1.300000000000000000e+01 3.000000000000000000e+00 -7.498521484375000000e+03 1.212153076171875000e+03 9.475000000000000000e+01 5.175000000000000000e+01
7.000000000000000000e+01 5.367615384615379526e+02 1.197365188598632812e+02 -3.974884033203125000e+00 2.842276692390441895e-01 1.588235259056091309e+00 1.584717163085937500e+03 2.217061281204223633e+00 1.300000000000000000e+01 4.000000000000000000e+00 -1.000000000000000000e+04 1.347112792968750000e+03 9.525000000000000000e+01 5.175000000000000000e+01
6.800000000000000000e+01 5.045999999999998522e+02 1.194635314941406250e+02 -4.328247070312500000e+00 4.040368497371673584e-01 0.000000000000000000e+00 1.548227539062500000e+03 1.101165890693664551e+00 1.300000000000000000e+01 4.000000000000000000e+00 -1.000000000000000000e+04 1.373094604492187500e+03 9.575000000000000000e+01 5.175000000000000000e+01
2.300000000000000000e+01 4.918769230769231058e+02 1.197251815795898438e+02 -5.192504882812500000e+00 8.893352746963500977e-01 0.000000000000000000e+00 1.464535034179687500e+03 2.014692544937133789e+00 1.300000000000000000e+01 3.000000000000000000e+00 -1.000000000000000000e+04 1.876892089843750000e+03 9.625000000000000000e+01 5.175000000000000000e+01
5.200000000000000000e+01 4.672923076923075882e+02 1.240679092407226562e+02 -6.056732177734375000e+00 7.966624498367309570e-01 3.529411852359771729e-01 1.380842407226562500e+03 2.071957349777221680e+00 1.300000000000000000e+01 4.000000000000000000e+00 -7.502008789062500000e+03 1.741213012695312500e+03 9.675000000000000000e+01 5.175000000000000000e+01
5.400000000000000000e+01 4.570307692307691241e+02 1.267267150878906250e+02 -6.920989990234375000e+00 7.312788963317871094e-01 3.529411852359771729e-01 1.297149902343750000e+03 1.504544377326965332e+00 1.300000000000000000e+01 4.000000000000000000e+00 -7.496210937500000000e+03 1.772498046875000000e+03 9.725000000000000000e+01 5.175000000000000000e+01
4.600000000000000000e+01 4.632384615384618201e+02 1.301344604492187500e+02 -7.659515380859375000e+00 9.088222384452819824e-01 0.000000000000000000e+00 1.229217407226562500e+03 1.206731915473937988e+00 1.300000000000000000e+01 4.000000000000000000e+00 -1.000000000000000000e+04 1.833677368164062500e+03 9.775000000000000000e+01 5.175000000000000000e+01
2.600000000000000000e+01 6.011846153846156540e+02 1.690993194580078125e+02 -7.205993652343750000e+00 6.889749765396118164e-01 6.470588445663452148e-01 1.432325439453125000e+03 7.824457287788391113e-01 8.000000000000000000e+00 3.000000000000000000e+00 1.221330547332763672e+01 1.436913696289062500e+03 1.017500000000000000e+02 5.175000000000000000e+01
1.900000000000000000e+01 6.397230769230772012e+02 1.725979309082031250e+02 -6.262298583984375000e+00 1.180338561534881592e-01 1.117647051811218262e+00 1.553796752929687500e+03 1.481072664260864258e+00 1.300000000000000000e+01 1.000000000000000000e+00 -5.000078613281250000e+03 8.264138793945312500e+02 1.022500000000000000e+02 5.175000000000000000e+01
1.300000000000000000e+01 7.216923076923077360e+02 2.020664825439453125e+02 -5.318634033203125000e+00 9.999999776482582092e-03 1.176470637321472168e+00 1.675268188476562500e+03 7.833500504493713379e-01 8.000000000000000000e+00 1.000000000000000000e+00 -1.000000000000000000e+04 8.229839477539062500e+02 1.027500000000000000e+02 5.175000000000000000e+01
2.600000000000000000e+01 8.563307692307687375e+02 2.824327697753906250e+02 -4.447784423828125000e+00 9.999999776482582092e-03 1.352941155433654785e+00 1.787845092773437500e+03 7.055003643035888672e-01 1.300000000000000000e+01 3.000000000000000000e+00 -1.000000000000000000e+04 7.411729125976562500e+02 1.032500000000000000e+02 5.175000000000000000e+01
6.200000000000000000e+01 4.441153846153846985e+02 1.509212188720703125e+02 -1.964996337890625000e+00 4.068632423877716064e-01 2.941176593303680420e-01 2.092185546875000000e+03 7.923910021781921387e-01 1.300000000000000000e+01 4.000000000000000000e+00 -1.000000000000000000e+04 1.234074707031250000e+03 1.067500000000000000e+02 5.175000000000000000e+01
3.600000000000000000e+01 3.537538461538460979e+02 1.442263641357421875e+02 -4.009613037109375000e+00 9.999999776482582092e-03 1.588235259056091309e+00 1.924208862304687500e+03 1.625049233436584473e+00 1.300000000000000000e+01 3.000000000000000000e+00 -2.482528320312500000e+03 6.278112792968750000e+02 1.082500000000000000e+02 5.175000000000000000e+01
3.000000000000000000e+01 3.778769230769230489e+02 1.556939697265625000e+02 -4.758270263671875000e+00 1.706103086471557617e-01 1.352941155433654785e+00 1.863030029296875000e+03 1.582901120185852051e+00 1.300000000000000000e+01 3.000000000000000000e+00 -2.499425292968750000e+03 8.360113525390625000e+02 1.087500000000000000e+02 5.175000000000000000e+01
5.400000000000000000e+01 3.904384615384617518e+02 1.496078186035156250e+02 -5.215576171875000000e+00 1.904024630784988403e-01 1.000000000000000000e+00 1.841629638671875000e+03 1.570269584655761719e+00 1.300000000000000000e+01 4.000000000000000000e+00 -1.000000000000000000e+04 8.164403686523437500e+02 1.092500000000000000e+02 5.175000000000000000e+01
2.300000000000000000e+01 3.927230769230769170e+02 1.515851745605468750e+02 -6.130187988281250000e+00 1.281798630952835083e-01 2.058823585510253906e+00 1.798828735351562500e+03 1.558963775634765625e+00 1.300000000000000000e+01 3.000000000000000000e+00 -7.509589843750000000e+03 7.600396728515625000e+02 1.102500000000000000e+02 5.175000000000000000e+01
2.700000000000000000e+01 3.990461538461538566e+02 1.565423583984375000e+02 -6.436157226562500000e+00 2.585662007331848145e-01 1.882352948188781738e+00 1.792123535156250000e+03 1.525130152702331543e+00 1.300000000000000000e+01 3.000000000000000000e+00 -1.000000000000000000e+04 9.565738525390625000e+02 1.107500000000000000e+02 5.175000000000000000e+01
1.800000000000000000e+01 3.894692307692309328e+02 1.478714294433593750e+02 -6.288024902343750000e+00 2.905383706092834473e-01 1.470588207244873047e+00 1.829503784179687500e+03 2.067195653915405273e+00 1.300000000000000000e+01 1.000000000000000000e+00 -1.000000000000000000e+04 1.068510620117187500e+03 1.112500000000000000e+02 5.175000000000000000e+01
1.300000000000000000e+01 3.506307692307694310e+02 1.388482971191406250e+02 -5.681030273437500000e+00 3.901109993457794189e-01 2.647058725357055664e+00 1.958099365234375000e+03 1.871841430664062500e+00 1.300000000000000000e+01 1.000000000000000000e+00 -4.989847167968750000e+03 1.049221435546875000e+03 1.127500000000000000e+02 5.175000000000000000e+01
1.100000000000000000e+01 3.344461538461539476e+02 1.386509246826171875e+02 -5.207580566406250000e+00 2.333937734365463257e-01 2.294117689132690430e+00 2.028389282226562500e+03 1.363426804542541504e+00 1.300000000000000000e+01 1.000000000000000000e+00 -7.494493652343750000e+03 1.002988098144531250e+03 1.132500000000000000e+02 5.175000000000000000e+01
1.800000000000000000e+01 3.381692307692307509e+02 1.302370758056640625e+02 -4.260650634765625000e+00 2.026125788688659668e-01 1.823529362678527832e+00 2.168969238281250000e+03 1.585838913917541504e+00 1.300000000000000000e+01 1.000000000000000000e+00 -1.000000000000000000e+04 8.471075439453125000e+02 1.142500000000000000e+02 5.175000000000000000e+01
9.000000000000000000e+00 3.351384615384616836e+02 1.276512451171875000e+02 -3.739746093750000000e+00 1.626006364822387695e-01 1.529411792755126953e+00 2.258749267578125000e+03 2.128892898559570312e+00 1.300000000000000000e+01 1.000000000000000000e+00 -1.000000000000000000e+04 7.009479980468750000e+02 1.152500000000000000e+02 5.175000000000000000e+01
5.100000000000000000e+01 3.400615384615385892e+02 1.305355834960937500e+02 -3.279663085937500000e+00 2.901277244091033936e-01 1.117647051811218262e+00 2.341272216796875000e+03 1.292363762855529785e+00 4.000000000000000000e+00 4.000000000000000000e+00 -1.000000000000000000e+04 7.660749511718750000e+02 1.162500000000000000e+02 5.175000000000000000e+01
6.000000000000000000e+01 3.513461538461538680e+02 1.414461059570312500e+02 -3.472778320312500000e+00 4.562067985534667969e-01 1.058823585510253906e+00 2.325527587890625000e+03 8.033563494682312012e-01 4.000000000000000000e+00 4.000000000000000000e+00 -1.000000000000000000e+04 8.938757934570312500e+02 1.167500000000000000e+02 5.175000000000000000e+01
8.000000000000000000e+00 3.583769230769231626e+02 1.457599029541015625e+02 -3.665863037109375000e+00 1.907510459423065186e-01 1.470588207244873047e+00 2.309782958984375000e+03 7.832564115524291992e-01 1.300000000000000000e+01 1.000000000000000000e+00 -2.489714111328125000e+03 7.196192626953125000e+02 1.172500000000000000e+02 5.175000000000000000e+01
4.900000000000000000e+01 3.640769230769229807e+02 1.524767150878906250e+02 -3.858978271484375000e+00 3.497788012027740479e-01 6.470588445663452148e-01 2.294038330078125000e+03 9.954797029495239258e-01 1.300000000000000000e+01 4.000000000000000000e+00 -4.992163574218750000e+03 8.125583496093750000e+02 1.177500000000000000e+02 5.175000000000000000e+01
4.500000000000000000e+01 3.726846153846151424e+02 1.601640472412109375e+02 -4.086639404296875000e+00 3.556795418262481689e-01 8.235294222831726074e-01 2.274666015625000000e+03 7.657207250595092773e-01 1.300000000000000000e+01 4.000000000000000000e+00 -7.495702148437500000e+03 8.284747924804687500e+02 1.182500000000000000e+02 5.175000000000000000e+01
3.100000000000000000e+01 3.803076923076923208e+02 1.709590148925781250e+02 -4.418029785156250000e+00 5.502527356147766113e-01 1.117647051811218262e+00 2.244411132812500000e+03 7.532713413238525391e-01 1.300000000000000000e+01 3.000000000000000000e+00 -1.000000000000000000e+04 9.217335205078125000e+02 1.187500000000000000e+02 5.175000000000000000e+01
4.700000000000000000e+01 3.800307692307693515e+02 1.824194946289062500e+02 -4.749420166015625000e+00 5.814755558967590332e-01 1.411764740943908691e+00 2.214156250000000000e+03 7.569800019264221191e-01 1.300000000000000000e+01 4.000000000000000000e+00 -7.495791992187500000e+03 9.487619018554687500e+02 1.192500000000000000e+02 5.175000000000000000e+01
2.500000000000000000e+01 3.860999999999999659e+02 1.890592803955078125e+02 -5.080810546875000000e+00 2.907604873180389404e-01 1.470588207244873047e+00 2.183901123046875000e+03 7.640292048454284668e-01 1.300000000000000000e+01 3.000000000000000000e+00 -7.498747558593750000e+03 7.675749511718750000e+02 1.197500000000000000e+02 5.175000000000000000e+01
2.000000000000000000e+01 3.938307692307692491e+02 1.933637390136718750e+02 -5.246826171875000000e+00 1.862252652645111084e-01 7.058823704719543457e-01 2.171017578125000000e+03 7.709246277809143066e-01 1.300000000000000000e+01 3.000000000000000000e+00 -4.995906738281250000e+03 5.947574462890625000e+02 1.202500000000000000e+02 5.175000000000000000e+01
6.200000000000000000e+01 4.121307692307693742e+02 1.988478851318359375e+02 -5.247436523437500000e+00 5.561034083366394043e-01 2.352941185235977173e-01 2.175505126953125000e+03 7.691789865493774414e-01 1.300000000000000000e+01 4.000000000000000000e+00 -7.497252929687500000e+03 9.011383056640625000e+02 1.207500000000000000e+02 5.175000000000000000e+01
5.300000000000000000e+01 4.236230769230771784e+02 2.043211669921875000e+02 -5.248046875000000000e+00 4.641496241092681885e-01 0.000000000000000000e+00 2.179992919921875000e+03 7.633944749832153320e-01 1.300000000000000000e+01 4.000000000000000000e+00 -1.000000000000000000e+04 8.130234985351562500e+02 1.212500000000000000e+02 5.175000000000000000e+01
4.600000000000000000e+01 4.410923076923075428e+02 2.085540618896484375e+02 -5.248657226562500000e+00 4.885019361972808838e-01 5.882353186607360840e-01 2.184480712890625000e+03 7.420272827148437500e-01 1.300000000000000000e+01 4.000000000000000000e+00 -4.995752929687500000e+03 7.627838745117187500e+02 1.217500000000000000e+02 5.175000000000000000e+01
2.100000000000000000e+01 4.602230769230766896e+02 2.127161712646484375e+02 -5.027801513671875000e+00 4.699898362159729004e-01 5.294117927551269531e-01 2.216850585937500000e+03 7.178128361701965332e-01 1.300000000000000000e+01 3.000000000000000000e+00 -1.000000000000000000e+04 8.860252685546875000e+02 1.222500000000000000e+02 5.175000000000000000e+01
3.500000000000000000e+01 4.716999999999999318e+02 2.199734039306640625e+02 -4.733123779296875000e+00 8.416699171066284180e-01 5.882353186607360840e-01 2.258514892578125000e+03 8.543450236320495605e-01 1.300000000000000000e+01 3.000000000000000000e+00 1.802217483520507812e+01 1.107417480468750000e+03 1.227500000000000000e+02 5.175000000000000000e+01
4.500000000000000000e+01 4.776692307692307509e+02 2.168193664550781250e+02 -4.438476562500000000e+00 6.933671832084655762e-01 0.000000000000000000e+00 2.300178955078125000e+03 1.018800497055053711e+00 1.300000000000000000e+01 4.000000000000000000e+00 -1.000000000000000000e+04 1.043208374023437500e+03 1.232500000000000000e+02 5.175000000000000000e+01
4.300000000000000000e+01 4.885769230769230944e+02 2.178118438720703125e+02 -4.143798828125000000e+00 6.428090929985046387e-01 2.941176593303680420e-01 2.341843261718750000e+03 7.380630373954772949e-01 1.300000000000000000e+01 3.000000000000000000e+00 7.768004417419433594e+00 9.552661743164062500e+02 1.237500000000000000e+02 5.175000000000000000e+01
1.700000000000000000e+01 4.923846153846152447e+02 2.112992706298828125e+02 -3.804718017578125000e+00 4.728175401687622070e-01 5.882352963089942932e-02 2.388083007812500000e+03 7.492602467536926270e-01 1.300000000000000000e+01 1.000000000000000000e+00 -2.488284667968750000e+03 7.074553222656250000e+02 1.242500000000000000e+02 5.175000000000000000e+01
5.600000000000000000e+01 4.841076923076922753e+02 2.018023834228515625e+02 -3.465667724609375000e+00 5.441057682037353516e-01 5.882352963089942932e-02 2.434322753906250000e+03 7.629489898681640625e-01 1.300000000000000000e+01 4.000000000000000000e+00 7.230106353759765625e+00 7.394725952148437500e+02 1.247500000000000000e+02 5.175000000000000000e+01
4.700000000000000000e+01 4.777461538461541295e+02 1.909627227783203125e+02 -3.126617431640625000e+00 2.788366377353668213e-01 0.000000000000000000e+00 2.480562500000000000e+03 7.833599448204040527e-01 1.300000000000000000e+01 4.000000000000000000e+00 -7.498281250000000000e+03 4.108947753906250000e+02 1.252500000000000000e+02 5.175000000000000000e+01
5.200000000000000000e+01 4.663846153846155289e+02 1.942265777587890625e+02 -2.857879638671875000e+00 1.743913441896438599e-01 5.882353186607360840e-01 2.516103271484375000e+03 8.198764324188232422e-01 1.300000000000000000e+01 4.000000000000000000e+00 -2.495889892578125000e+03 4.217527160644531250e+02 1.257500000000000000e+02 5.175000000000000000e+01
5.100000000000000000e+01 4.655615384615384755e+02 1.981035919189453125e+02 -2.800170898437500000e+00 1.173414438962936401e-01 8.823529481887817383e-01 2.519547119140625000e+03 8.517076969146728516e-01 5.000000000000000000e+00 4.000000000000000000e+00 -1.000000000000000000e+04 3.075881042480468750e+02 1.262500000000000000e+02 5.175000000000000000e+01
3.200000000000000000e+01 4.693615384615382595e+02 1.990436096191406250e+02 -2.742462158203125000e+00 9.999999776482582092e-03 1.705882310867309570e+00 2.522990722656250000e+03 8.691457509994506836e-01 4.000000000000000000e+00 3.000000000000000000e+00 -4.994196777343750000e+03 2.397966766357421875e+02 1.267500000000000000e+02 5.175000000000000000e+01
4.300000000000000000e+01 5.130538461538461661e+02 2.130135192871093750e+02 -2.684753417968750000e+00 1.130589991807937622e-01 1.529411792755126953e+00 2.526434570312500000e+03 8.694753646850585938e-01 5.000000000000000000e+00 3.000000000000000000e+00 -2.485906738281250000e+03 2.642817077636718750e+02 1.272500000000000000e+02 5.175000000000000000e+01
2.600000000000000000e+01 5.859692307692309896e+02 2.380066680908203125e+02 -3.099578857421875000e+00 1.080768480896949768e-01 1.647058844566345215e+00 2.456246337890625000e+03 9.510509967803955078e-01 5.000000000000000000e+00 3.000000000000000000e+00 1.728074073791503906e+01 2.374523315429687500e+02 1.282500000000000000e+02 5.175000000000000000e+01
4.100000000000000000e+01 6.134153846153848235e+02 2.451452636718750000e+02 -3.395385742187500000e+00 1.087805330753326416e-01 8.823529481887817383e-01 2.408306152343750000e+03 1.096394538879394531e+00 1.500000000000000000e+01 3.000000000000000000e+00 -7.498257812500000000e+03 2.241285247802734375e+02 1.287500000000000000e+02 5.175000000000000000e+01
2.800000000000000000e+01 6.041769230769230035e+02 2.443505096435546875e+02 -3.691192626953125000e+00 1.181105524301528931e-01 1.470588207244873047e+00 2.360366210937500000e+03 1.743325710296630859e+00 6.000000000000000000e+00 3.000000000000000000e+00 -4.996216796875000000e+03 2.075260772705078125e+02 1.292500000000000000e+02 5.175000000000000000e+01
2.800000000000000000e+01 5.837000000000000455e+02 2.417520294189453125e+02 -4.077667236328125000e+00 1.480513811111450195e-01 1.058823585510253906e+00 2.301203125000000000e+03 1.750763058662414551e+00 1.500000000000000000e+01 3.000000000000000000e+00 -4.997162109375000000e+03 2.287081146240234375e+02 1.297500000000000000e+02 5.175000000000000000e+01
1.800000000000000000e+01 5.807384615384618201e+02 2.467923431396484375e+02 -4.494415283203125000e+00 1.310444325208663940e-01 9.411764740943908691e-01 2.238299072265625000e+03 1.760617971420288086e+00 1.500000000000000000e+01 1.000000000000000000e+00 -4.994359863281250000e+03 2.484690551757812500e+02 1.302500000000000000e+02 5.175000000000000000e+01
4.800000000000000000e+01 6.021230769230768374e+02 2.538861694335937500e+02 -4.911132812500000000e+00 1.622387319803237915e-01 9.411764740943908691e-01 2.175395019531250000e+03 8.976973295211791992e-01 1.300000000000000000e+01 4.000000000000000000e+00 1.413805007934570312e+01 3.113084716796875000e+02 1.307500000000000000e+02 5.175000000000000000e+01
2.300000000000000000e+01 6.408846153846152447e+02 2.600630187988281250e+02 -5.327850341796875000e+00 3.432339131832122803e-01 1.470588207244873047e+00 2.112490966796875000e+03 9.830673933029174805e-01 1.300000000000000000e+01 3.000000000000000000e+00 -4.995915527343750000e+03 5.419951171875000000e+02 1.312500000000000000e+02 5.175000000000000000e+01
6.000000000000000000e+01 6.661076923076921048e+02 2.728015747070312500e+02 -5.627410888671875000e+00 6.204401850700378418e-01 6.470588445663452148e-01 2.064372314453125000e+03 1.848502635955810547e+00 1.300000000000000000e+01 4.000000000000000000e+00 1.156602668762207031e+01 8.066466064453125000e+02 1.317500000000000000e+02 5.175000000000000000e+01
4.100000000000000000e+01 6.735846153846154039e+02 2.948733825683593750e+02 -5.927001953125000000e+00 5.608506202697753906e-01 4.117647111415863037e-01 2.016253784179687500e+03 1.891959547996520996e+00 1.300000000000000000e+01 3.000000000000000000e+00 -2.480291503906250000e+03 6.635614013671875000e+02 1.322500000000000000e+02 5.175000000000000000e+01
6.600000000000000000e+01 6.803692307692307395e+02 3.197942504882812500e+02 -6.226562500000000000e+00 7.399882674217224121e-01 6.470588445663452148e-01 1.968135131835937500e+03 1.529926657676696777e+00 1.300000000000000000e+01 4.000000000000000000e+00 2.146376419067382812e+01 7.784636840820312500e+02 1.327500000000000000e+02 5.175000000000000000e+01
6.800000000000000000e+01 6.747538461538458705e+02 3.370351562500000000e+02 -6.463714599609375000e+00 5.358743071556091309e-01 5.882353186607360840e-01 1.924980834960937500e+03 1.450330853462219238e+00 1.300000000000000000e+01 4.000000000000000000e+00 -7.498773925781250000e+03 6.455067138671875000e+02 1.332500000000000000e+02 5.175000000000000000e+01
5.100000000000000000e+01 6.793384615384615017e+02 3.362394409179687500e+02 -6.513580322265625000e+00 7.677318453788757324e-01 7.058823704719543457e-01 1.896719238281250000e+03 1.510746717453002930e+00 1.300000000000000000e+01 4.000000000000000000e+00 -2.493385986328125000e+03 1.044090942382812500e+03 1.337500000000000000e+02 5.175000000000000000e+01
2.800000000000000000e+01 6.851307692307693742e+02 3.272986755371093750e+02 -6.563476562500000000e+00 7.450668811798095703e-01 5.882353186607360840e-01 1.868457641601562500e+03 1.689460515975952148e+00 1.300000000000000000e+01 3.000000000000000000e+00 -2.496197265625000000e+03 8.042445678710937500e+02 1.342500000000000000e+02 5.175000000000000000e+01
5.100000000000000000e+01 6.861461538461539931e+02 3.104742431640625000e+02 -6.613342285156250000e+00 8.325942158699035645e-01 9.411764740943908691e-01 1.840196044921875000e+03 1.619959831237792969e+00 1.300000000000000000e+01 4.000000000000000000e+00 9.435696601867675781e+00 9.575388793945312500e+02 1.347500000000000000e+02 5.175000000000000000e+01
5.100000000000000000e+01 6.502076923076922412e+02 3.073128662109375000e+02 -6.460571289062500000e+00 5.959826707839965820e-01 0.000000000000000000e+00 1.843570068359375000e+03 1.457779407501220703e+00 1.300000000000000000e+01 4.000000000000000000e+00 3.089737510681152344e+01 8.335162353515625000e+02 1.352500000000000000e+02 5.175000000000000000e+01
5.600000000000000000e+01 6.190615384615383618e+02 3.189740295410156250e+02 -6.105133056640625000e+00 2.373026311397552490e-01 6.470588445663452148e-01 1.878579956054687500e+03 1.342715501785278320e+00 1.300000000000000000e+01 4.000000000000000000e+00 4.133770370483398438e+01 2.990655212402343750e+02 1.357500000000000000e+02 5.175000000000000000e+01
1.800000000000000000e+01 5.837230769230772012e+02 2.966380920410156250e+02 -5.749725341796875000e+00 1.202784627676010132e-01 8.823529481887817383e-01 1.913589721679687500e+03 1.427291631698608398e+00 1.300000000000000000e+01 1.000000000000000000e+00 3.393116760253906250e+01 1.174815673828125000e+02 1.362500000000000000e+02 5.175000000000000000e+01
5.700000000000000000e+01 6.237384615384611379e+02 2.507258911132812500e+02 -4.980682373046875000e+00 2.072181254625320435e-01 2.352941185235977173e-01 1.974468994140625000e+03 1.191130638122558594e+00 1.300000000000000000e+01 4.000000000000000000e+00 1.561572647094726562e+01 2.687131347656250000e+02 1.372500000000000000e+02 5.175000000000000000e+01
3.100000000000000000e+01 6.500615384615388166e+02 2.390610809326171875e+02 -4.547668457031250000e+00 2.186650782823562622e-01 0.000000000000000000e+00 1.997291748046875000e+03 9.869922399520874023e-01 1.300000000000000000e+01 3.000000000000000000e+00 3.449579620361328125e+01 2.966491088867187500e+02 1.377500000000000000e+02 5.175000000000000000e+01
2.300000000000000000e+01 6.859461538461541750e+02 2.433800048828125000e+02 -4.114654541015625000e+00 3.569678962230682373e-01 5.294117927551269531e-01 2.020114379882812500e+03 8.008107542991638184e-01 1.300000000000000000e+01 3.000000000000000000e+00 1.815842437744140625e+01 5.896461791992187500e+02 1.382500000000000000e+02 5.175000000000000000e+01
6.800000000000000000e+01 6.711769230769228898e+02 2.549186553955078125e+02 -3.681640625000000000e+00 3.461315929889678955e-01 1.176470592617988586e-01 2.042937133789062500e+03 8.813071250915527344e-01 1.300000000000000000e+01 4.000000000000000000e+00 1.066434555053710938e+02 4.778445434570312500e+02 1.387500000000000000e+02 5.175000000000000000e+01
6.800000000000000000e+01 6.651923076923077360e+02 2.861148071289062500e+02 -2.101837158203125000e+00 9.999999776482582092e-03 6.470588445663452148e-01 1.957815917968750000e+03 7.922623753547668457e-01 3.000000000000000000e+00 4.000000000000000000e+00 1.288343143463134766e+01 2.160303649902343750e+02 1.407500000000000000e+02 5.175000000000000000e+01
5.800000000000000000e+01 6.458000000000002956e+02 3.676794128417968750e+02 -1.270355224609375000e+00 9.999999776482582092e-03 0.000000000000000000e+00 1.994883422851562500e+03 1.888541221618652344e+00 5.000000000000000000e+00 4.000000000000000000e+00 2.208323287963867188e+01 6.919288635253906250e+01 1.422500000000000000e+02 5.175000000000000000e+01
6.400000000000000000e+01 6.912846153846149946e+02 4.012913513183593750e+02 -1.102783203125000000e+00 9.999999776482582092e-03 0.000000000000000000e+00 1.944087036132812500e+03 1.788449764251708984e+00 5.000000000000000000e+00 4.000000000000000000e+00 -7.497080078125000000e+03 5.421742630004882812e+01 1.427500000000000000e+02 5.175000000000000000e+01
2.000000000000000000e+01 7.851923076923078497e+02 4.849254455566406250e+02 1.468627929687500000e+00 0.000000000000000000e+00 0.000000000000000000e+00 1.364660156250000000e+03 6.604224443435668945e-01 4.000000000000000000e+00 3.000000000000000000e+00 -1.000000000000000000e+04 1.625629730224609375e+02 1.567500000000000000e+02 5.175000000000000000e+01
2.700000000000000000e+01 7.887846153846155630e+02 5.197255859375000000e+02 1.108825683593750000e+00 9.999999776482582092e-03 0.000000000000000000e+00 1.348264404296875000e+03 1.167738914489746094e+00 1.200000000000000000e+01 3.000000000000000000e+00 -7.498370605468750000e+03 2.762058105468750000e+02 1.572500000000000000e+02 5.175000000000000000e+01
1.000000000000000000e+00 2.893769230769231058e+02 1.866921081542968750e+02 1.459838867187500000e+00 0.000000000000000000e+00 1.647058844566345215e+00 2.946482421875000000e+03 3.503480195999145508e+00 3.000000000000000000e+00 1.000000000000000000e+00 -1.000000000000000000e+04 3.421421813964843750e+02 6.875000000000000000e+01 5.225000000000000000e+01
1.000000000000000000e+00 3.232769230769229125e+02 1.887402343750000000e+02 1.244964599609375000e+00 0.000000000000000000e+00 3.117647171020507812e+00 2.884138671875000000e+03 3.528435945510864258e+00 3.000000000000000000e+00 1.000000000000000000e+00 -1.000000000000000000e+04 3.396660766601562500e+02 7.125000000000000000e+01 5.225000000000000000e+01
1.000000000000000000e+00 3.276307692307692605e+02 2.042375488281250000e+02 1.353729248046875000e+00 0.000000000000000000e+00 2.764705896377563477e+00 2.904741699218750000e+03 3.598022460937500000e+00 4.000000000000000000e+00 1.000000000000000000e+00 -1.000000000000000000e+04 2.062481384277343750e+02 7.275000000000000000e+01 5.225000000000000000e+01
1.000000000000000000e+00 3.281538461538459615e+02 2.053905487060546875e+02 1.395935058593750000e+00 0.000000000000000000e+00 2.235294103622436523e+00 2.914398193359375000e+03 3.623188972473144531e+00 4.000000000000000000e+00 1.000000000000000000e+00 -5.011933105468750000e+03 2.073137207031250000e+02 7.325000000000000000e+01 5.225000000000000000e+01
1.000000000000000000e+00 3.226846153846153697e+02 2.007960205078125000e+02 1.455871582031250000e+00 0.000000000000000000e+00 2.294117689132690430e+00 2.932421630859375000e+03 3.644076585769653320e+00 4.000000000000000000e+00 1.000000000000000000e+00 -5.008702148437500000e+03 1.677747955322265625e+02 7.375000000000000000e+01 5.225000000000000000e+01
0.000000000000000000e+00 3.122153846153847780e+02 1.886489562988281250e+02 1.515808105468750000e+00 0.000000000000000000e+00 1.647058844566345215e+00 2.950445312500000000e+03 3.642500400543212891e+00 4.000000000000000000e+00 1.000000000000000000e+00 -1.000000000000000000e+04 1.366909179687500000e+02 7.425000000000000000e+01 5.225000000000000000e+01
1.000000000000000000e+00 2.975615384615385324e+02 1.701927642822265625e+02 1.575744628906250000e+00 0.000000000000000000e+00 1.294117689132690430e+00 2.968468750000000000e+03 3.644939184188842773e+00 4.000000000000000000e+00 1.000000000000000000e+00 -1.000000000000000000e+04 1.228527069091796875e+02 7.475000000000000000e+01 5.225000000000000000e+01
1.000000000000000000e+00 2.828076923076921503e+02 1.556080322265625000e+02 1.634155273437500000e+00 0.000000000000000000e+00 2.176470518112182617e+00 2.987339355468750000e+03 3.654951810836791992e+00 4.000000000000000000e+00 1.000000000000000000e+00 -5.008512695312500000e+03 1.177053909301757812e+02 7.525000000000000000e+01 5.225000000000000000e+01
2.000000000000000000e+00 2.725769230769229807e+02 1.545067291259765625e+02 1.747955322265625000e+00 0.000000000000000000e+00 2.941176414489746094e+00 3.026774658203125000e+03 3.668186664581298828e+00 4.000000000000000000e+00 1.000000000000000000e+00 -2.511925292968750000e+03 1.231460571289062500e+02 7.625000000000000000e+01 5.225000000000000000e+01
0.000000000000000000e+00 2.694538461538462002e+02 1.533368835449218750e+02 1.976074218750000000e+00 0.000000000000000000e+00 2.176470518112182617e+00 3.078320068359375000e+03 3.658250570297241211e+00 4.000000000000000000e+00 1.000000000000000000e+00 -7.494835449218750000e+03 1.418773040771484375e+02 7.825000000000000000e+01 5.225000000000000000e+01
4.000000000000000000e+00 3.555692307692307850e+02 1.848373107910156250e+02 2.155212402343750000e+00 0.000000000000000000e+00 1.058823585510253906e+00 3.009500000000000000e+03 3.589127302169799805e+00 3.000000000000000000e+00 1.000000000000000000e+00 -7.502853515625000000e+03 2.426648559570312500e+02 8.025000000000000000e+01 5.225000000000000000e+01
2.300000000000000000e+01 5.081076923076923322e+02 2.543589477539062500e+02 8.754272460937500000e-01 0.000000000000000000e+00 1.823529362678527832e+00 2.425684082031250000e+03 3.496057033538818359e+00 4.000000000000000000e+00 3.000000000000000000e+00 -1.000000000000000000e+04 1.441516876220703125e+02 8.375000000000000000e+01 5.225000000000000000e+01
8.000000000000000000e+00 4.855153846153847894e+02 2.940383911132812500e+02 -1.312744140625000000e+00 0.000000000000000000e+00 1.823529362678527832e+00 1.949269042968750000e+03 3.628851175308227539e+00 8.000000000000000000e+00 1.000000000000000000e+00 -1.000000000000000000e+04 2.338879852294921875e+02 8.575000000000000000e+01 5.225000000000000000e+01
7.000000000000000000e+00 4.855923076923076565e+02 3.219670715332031250e+02 -1.950256347656250000e+00 0.000000000000000000e+00 7.647058963775634766e-01 1.828413574218750000e+03 2.751687526702880859e+00 8.000000000000000000e+00 1.000000000000000000e+00 -7.501501464843750000e+03 2.624255065917968750e+02 8.625000000000000000e+01 5.225000000000000000e+01
3.300000000000000000e+01 4.944538461538462570e+02 3.687469177246093750e+02 -2.504669189453125000e+00 0.000000000000000000e+00 0.000000000000000000e+00 1.753097534179687500e+03 9.113603234291076660e-01 5.000000000000000000e+00 3.000000000000000000e+00 -4.995935058593750000e+03 4.187490234375000000e+02 8.675000000000000000e+01 5.225000000000000000e+01
4.800000000000000000e+01 4.969307692307691013e+02 3.936607360839843750e+02 -3.059082031250000000e+00 0.000000000000000000e+00 0.000000000000000000e+00 1.677781494140625000e+03 8.927149772644042969e-01 1.300000000000000000e+01 4.000000000000000000e+00 -2.503631835937500000e+03 3.326931762695312500e+02 8.725000000000000000e+01 5.225000000000000000e+01
5.200000000000000000e+01 4.897384615384614790e+02 3.844317016601562500e+02 -3.613464355468750000e+00 0.000000000000000000e+00 0.000000000000000000e+00 1.602465454101562500e+03 8.607296347618103027e-01 1.300000000000000000e+01 4.000000000000000000e+00 -1.000000000000000000e+04 4.264547119140625000e+02 8.775000000000000000e+01 5.225000000000000000e+01
6.000000000000000000e+01 5.006538461538461320e+02 3.584697875976562500e+02 -4.064239501953125000e+00 0.000000000000000000e+00 2.941176593303680420e-01 1.544510009765625000e+03 8.173018693923950195e-01 1.300000000000000000e+01 4.000000000000000000e+00 -1.000000000000000000e+04 8.605977783203125000e+02 8.825000000000000000e+01 5.225000000000000000e+01
6.700000000000000000e+01 4.940615384615381345e+02 3.257189025878906250e+02 -4.204071044921875000e+00 3.242505490779876709e-01 0.000000000000000000e+00 1.538636230468750000e+03 1.136448502540588379e+00 1.300000000000000000e+01 4.000000000000000000e+00 -1.000000000000000000e+04 1.086932006835937500e+03 8.875000000000000000e+01 5.225000000000000000e+01
6.200000000000000000e+01 4.723999999999998636e+02 2.913648071289062500e+02 -4.343933105468750000e+00 2.527747154235839844e-01 5.882352963089942932e-02 1.532762451171875000e+03 9.119159579277038574e-01 1.300000000000000000e+01 4.000000000000000000e+00 -4.994684082031250000e+03 1.302760009765625000e+03 8.925000000000000000e+01 5.225000000000000000e+01
5.900000000000000000e+01 4.621000000000000227e+02 2.683831787109375000e+02 -4.483764648437500000e+00 3.067324161529541016e-01 2.941176593303680420e-01 1.526888671875000000e+03 7.509650588035583496e-01 1.300000000000000000e+01 4.000000000000000000e+00 5.995865821838378906e+00 9.381461181640625000e+02 8.975000000000000000e+01 5.225000000000000000e+01
5.900000000000000000e+01 4.990461538461537430e+02 2.489677581787109375e+02 -4.424804687500000000e+00 3.238154053688049316e-01 0.000000000000000000e+00 1.541974121093750000e+03 9.287434816360473633e-01 1.300000000000000000e+01 4.000000000000000000e+00 -1.000000000000000000e+04 1.429429565429687500e+03 9.025000000000000000e+01 5.225000000000000000e+01
5.900000000000000000e+01 5.190384615384616609e+02 2.290950469970703125e+02 -4.167083740234375000e+00 2.346625626087188721e-01 5.882352963089942932e-02 1.578018798828125000e+03 2.224936246871948242e+00 1.300000000000000000e+01 4.000000000000000000e+00 -7.498023437500000000e+03 9.284141235351562500e+02 9.075000000000000000e+01 5.225000000000000000e+01
6.800000000000000000e+01 5.468692307692309669e+02 2.155570068359375000e+02 -3.909362792968750000e+00 4.186608195304870605e-01 0.000000000000000000e+00 1.614063598632812500e+03 2.689410448074340820e+00 1.300000000000000000e+01 4.000000000000000000e+00 -1.000000000000000000e+04 1.294551879882812500e+03 9.125000000000000000e+01 5.225000000000000000e+01
1.800000000000000000e+01 6.450153846153846189e+02 2.117665557861328125e+02 -3.579833984375000000e+00 7.008703351020812988e-01 0.000000000000000000e+00 1.649890991210937500e+03 2.130972623825073242e+00 1.300000000000000000e+01 1.000000000000000000e+00 -7.498624511718750000e+03 1.688785766601562500e+03 9.225000000000000000e+01 5.225000000000000000e+01
5.500000000000000000e+01 7.457615384615387484e+02 2.213404693603515625e+02 -3.570007324218750000e+00 5.315950512886047363e-01 2.941176593303680420e-01 1.637586425781250000e+03 2.476828575134277344e+00 1.300000000000000000e+01 4.000000000000000000e+00 -7.498205566406250000e+03 1.504803588867187500e+03 9.275000000000000000e+01 5.225000000000000000e+01
5.200000000000000000e+01 7.846076923076923322e+02 2.195189208984375000e+02 -3.560180664062500000e+00 2.694344520568847656e-01 1.058823585510253906e+00 1.625281860351562500e+03 1.854239940643310547e+00 1.300000000000000000e+01 4.000000000000000000e+00 -7.494877929687500000e+03 1.091395996093750000e+03 9.325000000000000000e+01 5.225000000000000000e+01
3.200000000000000000e+01 7.672384615384618201e+02 1.865625762939453125e+02 -3.550354003906250000e+00 3.347938656806945801e-01 1.764705896377563477e+00 1.612977294921875000e+03 1.864314079284667969e+00 1.300000000000000000e+01 3.000000000000000000e+00 -1.000000000000000000e+04 1.168749023437500000e+03 9.375000000000000000e+01 5.225000000000000000e+01
2.700000000000000000e+01 7.272923076923077588e+02 1.671339111328125000e+02 -3.852935791015625000e+00 4.115306138992309570e-01 9.411764740943908691e-01 1.585908325195312500e+03 7.376706004142761230e-01 1.300000000000000000e+01 3.000000000000000000e+00 -7.495656738281250000e+03 1.300576538085937500e+03 9.425000000000000000e+01 5.225000000000000000e+01
7.100000000000000000e+01 6.797999999999998408e+02 1.596891632080078125e+02 -4.155517578125000000e+00 4.344869554042816162e-01 0.000000000000000000e+00 1.558839233398437500e+03 1.314606428146362305e+00 1.300000000000000000e+01 4.000000000000000000e+00 -1.000000000000000000e+04 1.835286621093750000e+03 9.475000000000000000e+01 5.225000000000000000e+01
1.200000000000000000e+01 6.402999999999999545e+02 1.555103607177734375e+02 -4.458099365234375000e+00 9.495268464088439941e-01 5.882352963089942932e-02 1.531770263671875000e+03 1.437718510627746582e+00 1.300000000000000000e+01 1.000000000000000000e+00 -7.497896484375000000e+03 1.967499511718750000e+03 9.525000000000000000e+01 5.225000000000000000e+01
5.600000000000000000e+01 5.804076923076920593e+02 1.485234985351562500e+02 -4.894134521484375000e+00 4.892394244670867920e-01 5.882352963089942932e-02 1.492052856445312500e+03 1.709285497665405273e+00 1.300000000000000000e+01 4.000000000000000000e+00 -1.000000000000000000e+04 1.483078002929687500e+03 9.575000000000000000e+01 5.225000000000000000e+01
4.300000000000000000e+01 4.893384615384617859e+02 1.417830657958984375e+02 -5.730560302734375000e+00 1.773753464221954346e-01 1.176470637321472168e+00 1.414390502929687500e+03 1.739133954048156738e+00 8.000000000000000000e+00 3.000000000000000000e+00 -7.501220703125000000e+03 9.540681762695312500e+02 9.625000000000000000e+01 5.225000000000000000e+01
6.800000000000000000e+01 4.699307692307695561e+02 1.453227844238281250e+02 -6.566955566406250000e+00 4.713699221611022949e-01 5.294117927551269531e-01 1.336728149414062500e+03 1.690532088279724121e+00 8.000000000000000000e+00 4.000000000000000000e+00 -5.004301757812500000e+03 1.317560302734375000e+03 9.675000000000000000e+01 5.225000000000000000e+01
4.800000000000000000e+01 4.545384615384612630e+02 1.500362548828125000e+02 -7.403350830078125000e+00 5.216789245605468750e-01 2.941176593303680420e-01 1.259065917968750000e+03 7.885105609893798828e-01 1.300000000000000000e+01 4.000000000000000000e+00 -7.502707519531250000e+03 1.324863037109375000e+03 9.725000000000000000e+01 5.225000000000000000e+01
1.200000000000000000e+01 4.605153846153847894e+02 1.530531005859375000e+02 -8.090423583984375000e+00 8.240131139755249023e-01 2.941176593303680420e-01 1.192055664062500000e+03 1.259464144706726074e+00 1.300000000000000000e+01 1.000000000000000000e+00 -8.836362838745117188e+00 1.812946289062500000e+03 9.775000000000000000e+01 5.225000000000000000e+01
5.600000000000000000e+01 4.828769230769231058e+02 1.540470275878906250e+02 -8.628143310546875000e+00 7.325397729873657227e-01 0.000000000000000000e+00 1.135697753906250000e+03 1.089396834373474121e+00 1.300000000000000000e+01 4.000000000000000000e+00 -1.000000000000000000e+04 1.767322875976562500e+03 9.825000000000000000e+01 5.225000000000000000e+01
2.700000000000000000e+01 4.550153846153846757e+02 1.520385589599609375e+02 -9.061035156250000000e+00 7.339830398559570312e-01 0.000000000000000000e+00 1.142679199218750000e+03 1.876287698745727539e+00 1.300000000000000000e+01 3.000000000000000000e+00 -7.494442871093750000e+03 1.723767822265625000e+03 1.002500000000000000e+02 5.225000000000000000e+01
6.000000000000000000e+00 4.848923076923074973e+02 1.666961212158203125e+02 -8.617065429687500000e+00 7.829664945602416992e-01 0.000000000000000000e+00 1.219128906250000000e+03 1.913092255592346191e+00 1.300000000000000000e+01 1.000000000000000000e+00 -1.000000000000000000e+04 1.886866333007812500e+03 1.007500000000000000e+02 5.225000000000000000e+01
4.600000000000000000e+01 6.152461538461540158e+02 1.892174530029296875e+02 -6.209564208984375000e+00 5.701243281364440918e-01 6.470588445663452148e-01 1.551047851562500000e+03 8.305874466896057129e-01 1.300000000000000000e+01 4.000000000000000000e+00 -7.504124511718750000e+03 1.377045166015625000e+03 1.022500000000000000e+02 5.225000000000000000e+01
5.300000000000000000e+01 6.642461538461537884e+02 2.047371215820312500e+02 -5.227813720703125000e+00 2.283327728509902954e-01 0.000000000000000000e+00 1.678782470703125000e+03 7.626628279685974121e-01 1.300000000000000000e+01 4.000000000000000000e+00 -1.534284305572509766e+01 9.709721679687500000e+02 1.027500000000000000e+02 5.225000000000000000e+01
3.200000000000000000e+01 6.357076923076923549e+02 2.217516479492187500e+02 -4.325286865234375000e+00 9.999999776482582092e-03 6.470588445663452148e-01 1.796463500976562500e+03 8.131346702575683594e-01 5.000000000000000000e+00 3.000000000000000000e+00 -7.501679199218750000e+03 5.739201049804687500e+02 1.032500000000000000e+02 5.225000000000000000e+01
5.200000000000000000e+01 6.202692307692307168e+02 2.091591186523437500e+02 -3.660369873046875000e+00 9.999999776482582092e-03 1.823529362678527832e+00 1.883983886718750000e+03 1.093162178993225098e+00 1.300000000000000000e+01 4.000000000000000000e+00 -7.497404296875000000e+03 6.704100952148437500e+02 1.037500000000000000e+02 5.225000000000000000e+01
3.800000000000000000e+01 5.656923076923078497e+02 2.054927825927734375e+02 -2.330505371093750000e+00 9.999999776482582092e-03 1.411764740943908691e+00 2.059024414062500000e+03 8.185333609580993652e-01 8.000000000000000000e+00 3.000000000000000000e+00 -2.489450439453125000e+03 6.449544677734375000e+02 1.047500000000000000e+02 5.225000000000000000e+01
1.800000000000000000e+01 5.425615384615383618e+02 2.143215332031250000e+02 -1.938171386718750000e+00 2.045920789241790771e-01 9.411764740943908691e-01 2.104381835937500000e+03 8.063786029815673828e-01 1.300000000000000000e+01 1.000000000000000000e+00 -7.499546386718750000e+03 7.830115356445312500e+02 1.052500000000000000e+02 5.225000000000000000e+01
4.800000000000000000e+01 3.780692307692307281e+02 1.480090332031250000e+02 -2.175567626953125000e+00 1.249895244836807251e-01 1.529411792755126953e+00 2.064273925781250000e+03 8.149670362472534180e-01 1.300000000000000000e+01 4.000000000000000000e+00 -1.000000000000000000e+04 7.925499877929687500e+02 1.072500000000000000e+02 5.225000000000000000e+01
1.700000000000000000e+01 3.688307692307692491e+02 1.431453399658203125e+02 -3.010833740234375000e+00 9.999999776482582092e-03 1.117647051811218262e+00 1.996954956054687500e+03 7.860171794891357422e-01 1.300000000000000000e+01 1.000000000000000000e+00 -5.004719238281250000e+03 6.294088745117187500e+02 1.077500000000000000e+02 5.225000000000000000e+01
5.500000000000000000e+01 3.830923076923075996e+02 1.511963195800781250e+02 -3.846099853515625000e+00 3.367627263069152832e-01 1.117647051811218262e+00 1.929635986328125000e+03 1.148947715759277344e+00 1.300000000000000000e+01 4.000000000000000000e+00 -1.000000000000000000e+04 8.722396850585937500e+02 1.082500000000000000e+02 5.225000000000000000e+01
3.500000000000000000e+01 3.990615384615384187e+02 1.420572357177734375e+02 -5.219451904296875000e+00 3.249969780445098877e-01 1.000000000000000000e+00 1.831196777343750000e+03 1.512105464935302734e+00 1.300000000000000000e+01 3.000000000000000000e+00 -1.000000000000000000e+04 1.171812255859375000e+03 1.092500000000000000e+02 5.225000000000000000e+01
1.600000000000000000e+01 4.092230769230767464e+02 1.379436798095703125e+02 -5.757537841796875000e+00 2.402503937482833862e-01 1.411764740943908691e+00 1.800076538085937500e+03 1.487041115760803223e+00 1.300000000000000000e+01 1.000000000000000000e+00 -5.006938964843750000e+03 7.872113647460937500e+02 1.097500000000000000e+02 5.225000000000000000e+01
5.700000000000000000e+01 3.902999999999999545e+02 1.490689239501953125e+02 -6.295623779296875000e+00 3.442046046257019043e-01 5.882353186607360840e-01 1.768956298828125000e+03 1.528961896896362305e+00 1.300000000000000000e+01 4.000000000000000000e+00 -4.989236816406250000e+03 9.861390991210937500e+02 1.102500000000000000e+02 5.225000000000000000e+01
1.800000000000000000e+01 3.834076923076922299e+02 1.553992462158203125e+02 -6.679168701171875000e+00 3.568010032176971436e-01 1.176470637321472168e+00 1.751523071289062500e+03 2.029413223266601562e+00 1.300000000000000000e+01 1.000000000000000000e+00 -4.991495605468750000e+03 9.214922485351562500e+02 1.107500000000000000e+02 5.225000000000000000e+01
3.100000000000000000e+01 3.841846153846153129e+02 1.468407745361328125e+02 -6.599182128906250000e+00 4.383732974529266357e-01 1.411764740943908691e+00 1.775150268554687500e+03 1.852601170539855957e+00 1.300000000000000000e+01 3.000000000000000000e+00 2.376744079589843750e+01 1.089694946289062500e+03 1.112500000000000000e+02 5.225000000000000000e+01
1.500000000000000000e+01 3.760999999999999659e+02 1.405124511718750000e+02 -6.519226074218750000e+00 4.006676077842712402e-01 1.176470637321472168e+00 1.798777465820312500e+03 1.762713193893432617e+00 5.000000000000000000e+00 1.000000000000000000e+00 -1.000000000000000000e+04 1.029520385742187500e+03 1.117500000000000000e+02 5.225000000000000000e+01
2.500000000000000000e+01 3.677384615384614790e+02 1.391370086669921875e+02 -6.439239501953125000e+00 4.629743993282318115e-01 1.235294103622436523e+00 1.822404785156250000e+03 2.109358787536621094e+00 1.300000000000000000e+01 3.000000000000000000e+00 -1.000000000000000000e+04 1.169061035156250000e+03 1.122500000000000000e+02 5.225000000000000000e+01
7.000000000000000000e+00 3.614538461538463139e+02 1.368211822509765625e+02 -6.179718017578125000e+00 3.990936875343322754e-01 9.411764740943908691e-01 1.861593627929687500e+03 1.827485442161560059e+00 1.300000000000000000e+01 1.000000000000000000e+00 -1.000000000000000000e+04 1.040685302734375000e+03 1.127500000000000000e+02 5.225000000000000000e+01
3.800000000000000000e+01 3.510153846153847894e+02 1.407391662597656250e+02 -5.301727294921875000e+00 3.589297831058502197e-01 2.294117689132690430e+00 1.971094726562500000e+03 2.080077171325683594e+00 1.300000000000000000e+01 3.000000000000000000e+00 -1.000000000000000000e+04 9.559185791015625000e+02 1.137500000000000000e+02 5.225000000000000000e+01
4.900000000000000000e+01 3.583615384615384301e+02 1.386326446533203125e+02 -4.862701416015625000e+00 4.278572499752044678e-01 1.235294103622436523e+00 2.025845214843750000e+03 1.480730295181274414e+00 1.300000000000000000e+01 4.000000000000000000e+00 -4.987646972656250000e+03 1.049628417968750000e+03 1.142500000000000000e+02 5.225000000000000000e+01
1.700000000000000000e+01 3.607384615384614790e+02 1.397868194580078125e+02 -4.572723388671875000e+00 3.788458406925201416e-01 1.411764740943908691e+00 2.070695556640625000e+03 1.015611648559570312e+00 1.300000000000000000e+01 1.000000000000000000e+00 -1.000000000000000000e+04 9.206111450195312500e+02 1.147500000000000000e+02 5.225000000000000000e+01
3.200000000000000000e+01 3.593307692307693060e+02 1.379219360351562500e+02 -4.332366943359375000e+00 4.326155483722686768e-01 1.588235259056091309e+00 2.112245849609375000e+03 7.631995677947998047e-01 1.300000000000000000e+01 3.000000000000000000e+00 -1.000000000000000000e+04 9.876885375976562500e+02 1.152500000000000000e+02 5.225000000000000000e+01
1.900000000000000000e+01 3.787384615384614222e+02 1.383388519287109375e+02 -4.183227539062500000e+00 3.521542847156524658e-01 1.941176414489746094e+00 2.180701660156250000e+03 1.524305939674377441e+00 4.000000000000000000e+00 1.000000000000000000e+00 -7.497263671875000000e+03 6.506729125976562500e+02 1.172500000000000000e+02 5.225000000000000000e+01
3.300000000000000000e+01 3.869384615384615813e+02 1.510302581787109375e+02 -4.348999023437500000e+00 1.875975877046585083e-01 1.529411792755126953e+00 2.173379394531250000e+03 9.516034722328186035e-01 1.300000000000000000e+01 3.000000000000000000e+00 -7.497389160156250000e+03 6.127921142578125000e+02 1.177500000000000000e+02 5.225000000000000000e+01
4.600000000000000000e+01 3.823615384615385437e+02 1.549810638427734375e+02 -4.543762207031250000e+00 3.633280396461486816e-01 1.352941155433654785e+00 2.162548339843750000e+03 7.782699465751647949e-01 1.300000000000000000e+01 4.000000000000000000e+00 -7.494506347656250000e+03 6.652672729492187500e+02 1.182500000000000000e+02 5.225000000000000000e+01
1.600000000000000000e+01 3.876230769230770079e+02 1.643531494140625000e+02 -4.825561523437500000e+00 6.120436787605285645e-01 1.647058844566345215e+00 2.141191406250000000e+03 7.656798958778381348e-01 1.300000000000000000e+01 1.000000000000000000e+00 -4.988947265625000000e+03 9.551909790039062500e+02 1.187500000000000000e+02 5.225000000000000000e+01
3.500000000000000000e+01 3.907769230769230262e+02 1.793507080078125000e+02 -5.107330322265625000e+00 3.496431410312652588e-01 1.352941155433654785e+00 2.119834472656250000e+03 7.578415870666503906e-01 1.300000000000000000e+01 3.000000000000000000e+00 -7.496921386718750000e+03 6.632318115234375000e+02 1.192500000000000000e+02 5.225000000000000000e+01
2.400000000000000000e+01 3.950076923076924231e+02 1.942265777587890625e+02 -5.389129638671875000e+00 3.652800023555755615e-01 1.235294103622436523e+00 2.098477539062500000e+03 7.596757411956787109e-01 1.300000000000000000e+01 3.000000000000000000e+00 -1.000000000000000000e+04 7.475314941406250000e+02 1.197500000000000000e+02 5.225000000000000000e+01
5.400000000000000000e+01 4.023923076923075541e+02 1.980342254638671875e+02 -5.518066406250000000e+00 4.808760881423950195e-01 1.647058844566345215e+00 2.092627685546875000e+03 7.675632834434509277e-01 1.300000000000000000e+01 4.000000000000000000e+00 -1.000000000000000000e+04 8.256599121093750000e+02 1.202500000000000000e+02 5.225000000000000000e+01
6.100000000000000000e+01 4.109153846153847098e+02 2.045476379394531250e+02 -5.494140625000000000e+00 1.663816720247268677e-01 5.882353186607360840e-01 2.102284667968750000e+03 7.707111835479736328e-01 1.300000000000000000e+01 4.000000000000000000e+00 -1.000000000000000000e+04 5.295565185546875000e+02 1.207500000000000000e+02 5.225000000000000000e+01
5.500000000000000000e+01 4.249307692307694424e+02 2.134648284912109375e+02 -5.470214843750000000e+00 3.794225752353668213e-01 1.058823585510253906e+00 2.111941650390625000e+03 7.586424946784973145e-01 1.300000000000000000e+01 4.000000000000000000e+00 -1.000000000000000000e+04 7.210326538085937500e+02 1.212500000000000000e+02 5.225000000000000000e+01
3.500000000000000000e+01 4.310384615384617746e+02 2.150811157226562500e+02 -5.446289062500000000e+00 4.285865426063537598e-01 0.000000000000000000e+00 2.121598388671875000e+03 9.271855950355529785e-01 6.000000000000000000e+00 3.000000000000000000e+00 -2.491386474609375000e+03 8.128855590820312500e+02 1.217500000000000000e+02 5.225000000000000000e+01
2.200000000000000000e+01 4.501230769230766668e+02 2.173361053466796875e+02 -5.221527099609375000e+00 6.846945881843566895e-01 2.941176593303680420e-01 2.155628662109375000e+03 9.762986898422241211e-01 1.300000000000000000e+01 3.000000000000000000e+00 -2.493054687500000000e+03 8.643173217773437500e+02 1.222500000000000000e+02 5.225000000000000000e+01
3.500000000000000000e+01 4.657307692307694538e+02 2.254903411865234375e+02 -4.929779052734375000e+00 8.029470443725585938e-01 5.882352963089942932e-02 2.197783203125000000e+03 7.137983441352844238e-01 1.300000000000000000e+01 3.000000000000000000e+00 1.752163314819335938e+01 1.044858642578125000e+03 1.227500000000000000e+02 5.225000000000000000e+01
4.100000000000000000e+01 4.758153846153845734e+02 2.228014068603515625e+02 -4.638031005859375000e+00 5.039018392562866211e-01 0.000000000000000000e+00 2.239937744140625000e+03 7.203949093818664551e-01 1.300000000000000000e+01 3.000000000000000000e+00 1.052950477600097656e+01 8.583038330078125000e+02 1.232500000000000000e+02 5.225000000000000000e+01
5.500000000000000000e+01 4.803923076923077815e+02 2.093776397705078125e+02 -4.346282958984375000e+00 5.130259394645690918e-01 0.000000000000000000e+00 2.282092285156250000e+03 7.394394278526306152e-01 1.300000000000000000e+01 4.000000000000000000e+00 -4.996521972656250000e+03 6.446795654296875000e+02 1.237500000000000000e+02 5.225000000000000000e+01
5.700000000000000000e+01 4.793538461538458364e+02 1.957993621826171875e+02 -4.007141113281250000e+00 3.546234667301177979e-01 0.000000000000000000e+00 2.330020996093750000e+03 7.598772048950195312e-01 1.300000000000000000e+01 4.000000000000000000e+00 -2.492647460937500000e+03 5.429318847656250000e+02 1.242500000000000000e+02 5.225000000000000000e+01
5.200000000000000000e+01 4.743999999999999773e+02 1.788746032714843750e+02 -3.667999267578125000e+00 3.334347605705261230e-01 0.000000000000000000e+00 2.377949951171875000e+03 7.787026762962341309e-01 1.300000000000000000e+01 4.000000000000000000e+00 -1.000000000000000000e+04 4.217160949707031250e+02 1.247500000000000000e+02 5.225000000000000000e+01
3.100000000000000000e+01 4.661384615384616836e+02 1.843121337890625000e+02 -3.328826904296875000e+00 1.891798526048660278e-01 0.000000000000000000e+00 2.425878662109375000e+03 8.065733909606933594e-01 1.300000000000000000e+01 3.000000000000000000e+00 -1.000000000000000000e+04 3.955706176757812500e+02 1.252500000000000000e+02 5.225000000000000000e+01
1.200000000000000000e+01 4.564615384615385096e+02 1.950811004638671875e+02 -3.063537597656250000e+00 1.827220469713211060e-01 8.235294222831726074e-01 2.462787109375000000e+03 8.333567976951599121e-01 1.300000000000000000e+01 1.000000000000000000e+00 -1.000000000000000000e+04 3.605732727050781250e+02 1.257500000000000000e+02 5.225000000000000000e+01
1.600000000000000000e+01 4.628153846153846303e+02 1.998926696777343750e+02 -3.019866943359375000e+00 1.233678385615348816e-01 9.411764740943908691e-01 2.466634277343750000e+03 8.458669781684875488e-01 5.000000000000000000e+00 1.000000000000000000e+00 -1.000000000000000000e+04 2.671046752929687500e+02 1.262500000000000000e+02 5.225000000000000000e+01
2.800000000000000000e+01 4.890538461538462229e+02 2.024453277587890625e+02 -2.976165771484375000e+00 1.258605271577835083e-01 1.470588207244873047e+00 2.470481201171875000e+03 8.503383398056030273e-01 4.000000000000000000e+00 3.000000000000000000e+00 2.232178497314453125e+01 2.862102050781250000e+02 1.267500000000000000e+02 5.225000000000000000e+01
8.000000000000000000e+00 5.253769230769231626e+02 2.121918334960937500e+02 -2.932464599609375000e+00 1.586413234472274780e-01 1.588235259056091309e+00 2.474328369140625000e+03 8.516210913658142090e-01 5.000000000000000000e+00 1.000000000000000000e+00 -7.496136230468750000e+03 3.218911437988281250e+02 1.272500000000000000e+02 5.225000000000000000e+01
2.800000000000000000e+01 5.521153846153844142e+02 2.283372802734375000e+02 -3.059631347656250000e+00 1.484630256891250610e-01 1.117647051811218262e+00 2.450828125000000000e+03 8.573030829429626465e-01 5.000000000000000000e+00 3.000000000000000000e+00 -2.488500732421875000e+03 2.896652526855468750e+02 1.277500000000000000e+02 5.225000000000000000e+01
2.700000000000000000e+01 5.763461538461536975e+02 2.461466369628906250e+02 -3.357635498046875000e+00 1.332151591777801514e-01 7.647058963775634766e-01 2.399980957031250000e+03 8.630157709121704102e-01 5.000000000000000000e+00 3.000000000000000000e+00 -4.993643554687500000e+03 2.380720977783203125e+02 1.282500000000000000e+02 5.225000000000000000e+01
1.900000000000000000e+01 6.050692307692305576e+02 2.596638793945312500e+02 -3.655639648437500000e+00 1.559539288282394409e-01 8.823529481887817383e-01 2.349133544921875000e+03 9.124808907508850098e-01 3.000000000000000000e+00 1.000000000000000000e+00 -2.494071777343750000e+03 2.755950317382812500e+02 1.287500000000000000e+02 5.225000000000000000e+01
4.000000000000000000e+01 5.883307692307690786e+02 2.555599212646484375e+02 -3.953643798828125000e+00 1.357021033763885498e-01 1.411764740943908691e+00 2.298286376953125000e+03 8.994050025939941406e-01 5.000000000000000000e+00 3.000000000000000000e+00 1.393372344970703125e+01 2.114211730957031250e+02 1.292500000000000000e+02 5.225000000000000000e+01
2.600000000000000000e+01 5.678000000000000682e+02 2.397181243896484375e+02 -4.352935791015625000e+00 1.554270386695861816e-01 1.764705896377563477e+00 2.238392822265625000e+03 1.326204061508178711e+00 1.500000000000000000e+01 3.000000000000000000e+00 -4.996942871093750000e+03 2.160815429687500000e+02 1.297500000000000000e+02 5.225000000000000000e+01
2.100000000000000000e+01 5.763000000000000682e+02 2.427270507812500000e+02 -4.785980224609375000e+00 1.905516237020492554e-01 8.235294222831726074e-01 2.175483886718750000e+03 1.762444019317626953e+00 3.000000000000000000e+00 3.000000000000000000e+00 -4.995263183593750000e+03 2.469302368164062500e+02 1.302500000000000000e+02 5.225000000000000000e+01
5.800000000000000000e+01 6.049076923076922867e+02 2.585931396484375000e+02 -5.219055175781250000e+00 2.437982261180877686e-01 1.058823585510253906e+00 2.112574951171875000e+03 1.186881899833679199e+00 1.500000000000000000e+01 4.000000000000000000e+00 -2.495630371093750000e+03 3.373306884765625000e+02 1.307500000000000000e+02 5.225000000000000000e+01
4.000000000000000000e+01 6.279615384615383391e+02 2.726158447265625000e+02 -5.652099609375000000e+00 2.521023154258728027e-01 1.823529362678527832e+00 2.049666015625000000e+03 1.583880543708801270e+00 1.500000000000000000e+01 3.000000000000000000e+00 -1.000000000000000000e+04 3.124179077148437500e+02 1.312500000000000000e+02 5.225000000000000000e+01
5.900000000000000000e+01 6.697384615384614790e+02 3.026889343261718750e+02 -6.282348632812500000e+00 3.922818601131439209e-01 6.470588445663452148e-01 1.949638916015625000e+03 1.745576858520507812e+00 1.300000000000000000e+01 4.000000000000000000e+00 -7.503576171875000000e+03 5.434771728515625000e+02 1.322500000000000000e+02 5.225000000000000000e+01
5.400000000000000000e+01 7.030000000000004547e+02 3.165681762695312500e+02 -6.597473144531250000e+00 7.377821803092956543e-01 2.941176593303680420e-01 1.899625366210937500e+03 1.768023133277893066e+00 1.300000000000000000e+01 4.000000000000000000e+00 1.212570571899414062e+01 9.686719970703125000e+02 1.327500000000000000e+02 5.225000000000000000e+01
1.400000000000000000e+01 6.934538461538460297e+02 3.273416137695312500e+02 -6.836944580078125000e+00 7.934449911117553711e-01 1.000000000000000000e+00 1.856291870117187500e+03 1.717329859733581543e+00 1.300000000000000000e+01 1.000000000000000000e+00 -4.977669433593750000e+03 9.753572387695312500e+02 1.332500000000000000e+02 5.225000000000000000e+01
2.600000000000000000e+01 6.975769230769230944e+02 3.328032226562500000e+02 -6.849548339843750000e+00 7.436050772666931152e-01 1.000000000000000000e+00 1.832998901367187500e+03 1.645524263381958008e+00 1.300000000000000000e+01 3.000000000000000000e+00 -2.487601806640625000e+03 9.171857910156250000e+02 1.337500000000000000e+02 5.225000000000000000e+01
2.800000000000000000e+01 7.083769230769230489e+02 3.345850219726562500e+02 -6.862152099609375000e+00 9.157198071479797363e-01 0.000000000000000000e+00 1.809705810546875000e+03 1.313874244689941406e+00 1.300000000000000000e+01 3.000000000000000000e+00 -4.996264648437500000e+03 1.297739379882812500e+03 1.342500000000000000e+02 5.225000000000000000e+01
5.700000000000000000e+01 7.105307692307698062e+02 3.286333312988281250e+02 -6.874755859375000000e+00 7.075766324996948242e-01 5.294117927551269531e-01 1.786412841796875000e+03 1.468817949295043945e+00 1.300000000000000000e+01 4.000000000000000000e+00 -1.000000000000000000e+04 7.565019531250000000e+02 1.347500000000000000e+02 5.225000000000000000e+01
5.200000000000000000e+01 6.662230769230766327e+02 3.187127075195312500e+02 -6.677612304687500000e+00 4.034671783447265625e-01 5.882353186607360840e-01 1.795863891601562500e+03 1.449198484420776367e+00 1.300000000000000000e+01 4.000000000000000000e+00 -7.495615722656250000e+03 4.669564819335937500e+02 1.352500000000000000e+02 5.225000000000000000e+01
4.600000000000000000e+01 6.197846153846155630e+02 3.120475158691406250e+02 -6.270690917968750000e+00 2.327760607004165649e-01 0.000000000000000000e+00 1.838058837890625000e+03 8.824481368064880371e-01 1.300000000000000000e+01 4.000000000000000000e+00 8.102664947509765625e+00 2.825814819335937500e+02 1.357500000000000000e+02 5.225000000000000000e+01
2.700000000000000000e+01 5.820000000000000000e+02 2.810489501953125000e+02 -5.863769531250000000e+00 1.390112489461898804e-01 5.882353186607360840e-01 1.880253784179687500e+03 1.537275671958923340e+00 1.500000000000000000e+01 3.000000000000000000e+00 -7.495890625000000000e+03 9.583340454101562500e+01 1.362500000000000000e+02 5.225000000000000000e+01
5.300000000000000000e+01 6.247076923076922412e+02 2.481943817138671875e+02 -5.008117675781250000e+00 6.059069037437438965e-01 7.058823704719543457e-01 1.956270263671875000e+03 1.283823728561401367e+00 1.300000000000000000e+01 4.000000000000000000e+00 -7.495745117187500000e+03 6.769270629882812500e+02 1.372500000000000000e+02 5.225000000000000000e+01
2.100000000000000000e+01 6.378692307692303984e+02 2.431020202636718750e+02 -4.545440673828125000e+00 4.984976947307586670e-01 5.882353186607360840e-01 1.987300537109375000e+03 1.758712530136108398e+00 1.300000000000000000e+01 3.000000000000000000e+00 -2.478412597656250000e+03 6.602786865234375000e+02 1.377500000000000000e+02 5.225000000000000000e+01
4.100000000000000000e+01 6.433538461538463480e+02 2.519434356689453125e+02 -4.082763671875000000e+00 1.462471932172775269e-01 1.411764740943908691e+00 2.018330810546875000e+03 1.416341185569763184e+00 1.300000000000000000e+01 3.000000000000000000e+00 -1.000000000000000000e+04 2.082911224365234375e+02 1.382500000000000000e+02 5.225000000000000000e+01
6.400000000000000000e+01 6.628384615384615017e+02 2.613120422363281250e+02 -3.620056152343750000e+00 3.004017174243927002e-01 0.000000000000000000e+00 2.049361083984375000e+03 1.107292175292968750e+00 1.300000000000000000e+01 4.000000000000000000e+00 -2.481495849609375000e+03 4.291841735839843750e+02 1.387500000000000000e+02 5.225000000000000000e+01
6.700000000000000000e+01 6.516076923076924459e+02 2.696832275390625000e+02 -3.230712890625000000e+00 9.999999776482582092e-03 4.117647111415863037e-01 2.053975585937500000e+03 1.128549695014953613e+00 1.500000000000000000e+01 4.000000000000000000e+00 1.713190650939941406e+01 1.938614959716796875e+02 1.392500000000000000e+02 5.225000000000000000e+01
7.700000000000000000e+01 6.427307692307689422e+02 2.837893676757812500e+02 -2.102661132812500000e+00 3.366170823574066162e-01 0.000000000000000000e+00 2.061626220703125000e+03 1.540217757225036621e+00 1.300000000000000000e+01 4.000000000000000000e+00 -4.988004394531250000e+03 5.491082153320312500e+02 1.407500000000000000e+02 5.225000000000000000e+01
5.800000000000000000e+01 6.215153846153845052e+02 3.435638427734375000e+02 -1.414276123046875000e+00 9.999999776482582092e-03 0.000000000000000000e+00 2.001155761718750000e+03 1.866120457649230957e+00 5.000000000000000000e+00 4.000000000000000000e+00 1.441912841796875000e+01 1.456587066650390625e+02 1.422500000000000000e+02 5.225000000000000000e+01
1.100000000000000000e+01 6.674923076923076906e+02 3.886336669921875000e+02 -1.279876708984375000e+00 9.999999776482582092e-03 5.882353186607360840e-01 1.931623535156250000e+03 1.683720827102661133e+00 5.000000000000000000e+00 1.000000000000000000e+00 -4.992565429687500000e+03 7.177745056152343750e+01 1.427500000000000000e+02 5.225000000000000000e+01
1.400000000000000000e+01 8.257153846153840959e+02 4.795975952148437500e+02 8.503723144531250000e-01 0.000000000000000000e+00 0.000000000000000000e+00 1.321257446289062500e+03 7.391448616981506348e-01 1.500000000000000000e+01 1.000000000000000000e+00 -4.994705566406250000e+03 7.815613555908203125e+01 1.567500000000000000e+02 5.225000000000000000e+01
2.100000000000000000e+01 8.113384615384619565e+02 5.171799316406250000e+02 3.412780761718750000e-01 0.000000000000000000e+00 0.000000000000000000e+00 1.297243530273437500e+03 8.169538378715515137e-01 1.200000000000000000e+01 3.000000000000000000e+00 -1.000000000000000000e+04 3.543997497558593750e+02 1.572500000000000000e+02 5.225000000000000000e+01
2.600000000000000000e+01 8.707538461538462116e+02 5.484328002929687500e+02 3.443603515625000000e-01 0.000000000000000000e+00 0.000000000000000000e+00 1.297010620117187500e+03 1.069622278213500977e+00 1.200000000000000000e+01 3.000000000000000000e+00 -7.498154296875000000e+03 3.281955566406250000e+02 1.577500000000000000e+02 5.225000000000000000e+01
3.000000000000000000e+00 3.206230769230768942e+02 1.678986206054687500e+02 1.062408447265625000e+00 0.000000000000000000e+00 1.470588207244873047e+00 2.845674560546875000e+03 3.452646493911743164e+00 4.000000000000000000e+00 1.000000000000000000e+00 -1.000000000000000000e+04 3.821189880371093750e+02 7.025000000000000000e+01 5.275000000000000000e+01
1.000000000000000000e+00 3.337461538461539021e+02 1.747028656005859375e+02 1.075836181640625000e+00 0.000000000000000000e+00 2.647058725357055664e+00 2.840253173828125000e+03 3.492729902267456055e+00 3.000000000000000000e+00 1.000000000000000000e+00 -1.000000000000000000e+04 2.594867858886718750e+02 7.125000000000000000e+01 5.275000000000000000e+01
2.000000000000000000e+00 3.319846153846154948e+02 1.769935302734375000e+02 1.138336181640625000e+00 0.000000000000000000e+00 2.823529481887817383e+00 2.851275878906250000e+03 3.508185386657714844e+00 4.000000000000000000e+00 1.000000000000000000e+00 -1.000000000000000000e+04 2.344260406494140625e+02 7.175000000000000000e+01 5.275000000000000000e+01
1.000000000000000000e+00 3.357538461538460979e+02 1.795989837646484375e+02 1.200866699218750000e+00 0.000000000000000000e+00 2.941176414489746094e+00 2.862298583984375000e+03 3.542881488800048828e+00 4.000000000000000000e+00 1.000000000000000000e+00 -1.000000000000000000e+04 2.428062896728515625e+02 7.225000000000000000e+01 5.275000000000000000e+01
1.000000000000000000e+00 3.349307692307692719e+02 1.806025238037109375e+02 1.263366699218750000e+00 0.000000000000000000e+00 2.235294103622436523e+00 2.873321289062500000e+03 3.574564695358276367e+00 4.000000000000000000e+00 1.000000000000000000e+00 -1.000000000000000000e+04 1.910795135498046875e+02 7.275000000000000000e+01 5.275000000000000000e+01
0.000000000000000000e+00 3.308461538461539249e+02 1.792392425537109375e+02 1.326873779296875000e+00 0.000000000000000000e+00 2.411764621734619141e+00 2.885904785156250000e+03 3.609376907348632812e+00 4.000000000000000000e+00 1.000000000000000000e+00 -1.000000000000000000e+04 9.396917724609375000e+01 7.325000000000000000e+01 5.275000000000000000e+01
0.000000000000000000e+00 3.184153846153846530e+02 1.642063598632812500e+02 1.459625244140625000e+00 0.000000000000000000e+00 2.000000000000000000e+00 2.920436035156250000e+03 3.613140821456909180e+00 4.000000000000000000e+00 1.000000000000000000e+00 -1.000000000000000000e+04 8.773937988281250000e+01 7.425000000000000000e+01 5.275000000000000000e+01
0.000000000000000000e+00 3.066615384615383277e+02 1.555305480957031250e+02 1.526031494140625000e+00 0.000000000000000000e+00 2.352941274642944336e+00 2.937701660156250000e+03 3.605574131011962891e+00 4.000000000000000000e+00 1.000000000000000000e+00 -5.013427734375000000e+03 1.183935470581054688e+02 7.475000000000000000e+01 5.275000000000000000e+01
1.000000000000000000e+00 2.901769230769230603e+02 1.502383880615234375e+02 1.570831298828125000e+00 0.000000000000000000e+00 2.647058725357055664e+00 2.953318359375000000e+03 3.606655597686767578e+00 4.000000000000000000e+00 1.000000000000000000e+00 -1.000000000000000000e+04 1.234984893798828125e+02 7.525000000000000000e+01 5.275000000000000000e+01
1.000000000000000000e+00 2.848538461538461206e+02 1.508880920410156250e+02 1.594085693359375000e+00 0.000000000000000000e+00 2.294117689132690430e+00 2.967286132812500000e+03 3.613778114318847656e+00 4.000000000000000000e+00 1.000000000000000000e+00 -1.000000000000000000e+04 1.140309066772460938e+02 7.575000000000000000e+01 5.275000000000000000e+01
3.000000000000000000e+00 2.788307692307693060e+02 1.547660064697265625e+02 1.617370605468750000e+00 0.000000000000000000e+00 2.176470518112182617e+00 2.981253906250000000e+03 3.613498687744140625e+00 4.000000000000000000e+00 1.000000000000000000e+00 -5.005363769531250000e+03 1.095680465698242188e+02 7.625000000000000000e+01 5.275000000000000000e+01
4.000000000000000000e+00 2.814153846153846530e+02 1.579717559814453125e+02 1.640625000000000000e+00 0.000000000000000000e+00 2.000000000000000000e+00 2.995221679687500000e+03 3.615935564041137695e+00 4.000000000000000000e+00 1.000000000000000000e+00 -1.000000000000000000e+04 1.056818466186523438e+02 7.675000000000000000e+01 5.275000000000000000e+01
1.000000000000000000e+00 2.717538461538460410e+02 1.594133911132812500e+02 1.648681640625000000e+00 0.000000000000000000e+00 2.529411792755126953e+00 3.001403320312500000e+03 3.614689826965332031e+00 4.000000000000000000e+00 1.000000000000000000e+00 -1.000000000000000000e+04 1.019334945678710938e+02 7.725000000000000000e+01 5.275000000000000000e+01
1.000000000000000000e+00 2.675615384615385324e+02 1.596069030761718750e+02 1.651672363281250000e+00 0.000000000000000000e+00 2.352941274642944336e+00 3.004989746093750000e+03 3.611475229263305664e+00 4.000000000000000000e+00 1.000000000000000000e+00 -5.007436523437500000e+03 1.285410308837890625e+02 7.775000000000000000e+01 5.275000000000000000e+01
1.000000000000000000e+00 2.761615384615384414e+02 1.613714599609375000e+02 1.657684326171875000e+00 0.000000000000000000e+00 1.411764740943908691e+00 3.012162353515625000e+03 3.604932069778442383e+00 4.000000000000000000e+00 1.000000000000000000e+00 -1.921303558349609375e+01 1.249945220947265625e+02 7.875000000000000000e+01 5.275000000000000000e+01
5.600000000000000000e+01 5.067307692307695106e+02 2.744213256835937500e+02 5.767822265625000000e-01 0.000000000000000000e+00 5.882352963089942932e-02 2.366030273437500000e+03 9.417792558670043945e-01 1.000000000000000000e+00 4.000000000000000000e+00 -5.003348632812500000e+03 1.929127807617187500e+02 8.425000000000000000e+01 5.275000000000000000e+01
9.000000000000000000e+00 5.255230769230769283e+02 3.042780761718750000e+02 -3.132324218750000000e-01 0.000000000000000000e+00 1.588235259056091309e+00 2.164527832031250000e+03 3.573866128921508789e+00 8.000000000000000000e+00 1.000000000000000000e+00 -1.000000000000000000e+04 2.533611297607421875e+02 8.525000000000000000e+01 5.275000000000000000e+01
4.000000000000000000e+00 5.229307692307692150e+02 3.176345825195312500e+02 -7.888488769531250000e-01 0.000000000000000000e+00 2.411764621734619141e+00 2.062438720703125000e+03 3.569658517837524414e+00 8.000000000000000000e+00 1.000000000000000000e+00 -1.000000000000000000e+04 2.900356750488281250e+02 8.575000000000000000e+01 5.275000000000000000e+01
1.000000000000000000e+01 5.232230769230770875e+02 3.504427795410156250e+02 -1.264434814453125000e+00 0.000000000000000000e+00 9.411764740943908691e-01 1.960349731445312500e+03 3.548008203506469727e+00 8.000000000000000000e+00 1.000000000000000000e+00 -5.002965820312500000e+03 2.467559661865234375e+02 8.625000000000000000e+01 5.275000000000000000e+01
5.800000000000000000e+01 5.297692307692304894e+02 3.918076782226562500e+02 -1.712982177734375000e+00 0.000000000000000000e+00 5.882352963089942932e-02 1.891082153320312500e+03 1.404153108596801758e+00 5.000000000000000000e+00 4.000000000000000000e+00 -1.000000000000000000e+04 3.736875610351562500e+02 8.675000000000000000e+01 5.275000000000000000e+01
4.900000000000000000e+01 5.286538461538461888e+02 4.176632995605468750e+02 -2.161529541015625000e+00 0.000000000000000000e+00 0.000000000000000000e+00 1.821814453125000000e+03 8.954142928123474121e-01 5.000000000000000000e+00 4.000000000000000000e+00 -7.501702148437500000e+03 4.315669555664062500e+02 8.725000000000000000e+01 5.275000000000000000e+01
5.900000000000000000e+01 5.251076923076924459e+02 3.937138671875000000e+02 -2.610076904296875000e+00 0.000000000000000000e+00 0.000000000000000000e+00 1.752546875000000000e+03 8.695151209831237793e-01 5.000000000000000000e+00 4.000000000000000000e+00 -5.002079589843750000e+03 5.237344360351562500e+02 8.775000000000000000e+01 5.275000000000000000e+01
5.100000000000000000e+01 5.081846153846154834e+02 3.453008728027343750e+02 -2.986541748046875000e+00 0.000000000000000000e+00 0.000000000000000000e+00 1.697927368164062500e+03 8.522455096244812012e-01 1.300000000000000000e+01 4.000000000000000000e+00 -1.000000000000000000e+04 6.101287841796875000e+02 8.825000000000000000e+01 5.275000000000000000e+01
5.900000000000000000e+01 4.986461538461539362e+02 3.141332397460937500e+02 -3.146759033203125000e+00 9.999999776482582092e-03 2.941176593303680420e-01 1.687252075195312500e+03 8.360385298728942871e-01 1.300000000000000000e+01 4.000000000000000000e+00 -1.000000000000000000e+04 7.220399780273437500e+02 8.875000000000000000e+01 5.275000000000000000e+01
4.500000000000000000e+01 4.880384615384615472e+02 2.814952087402343750e+02 -3.306976318359375000e+00 9.999999776482582092e-03 0.000000000000000000e+00 1.676576904296875000e+03 8.307769894599914551e-01 1.300000000000000000e+01 4.000000000000000000e+00 -4.995659179687500000e+03 9.454376220703125000e+02 8.925000000000000000e+01 5.275000000000000000e+01
6.000000000000000000e+00 4.648846153846154721e+02 2.586670837402343750e+02 -3.467193603515625000e+00 0.000000000000000000e+00 6.470588445663452148e-01 1.665901611328125000e+03 8.316416740417480469e-01 1.300000000000000000e+01 1.000000000000000000e+00 -1.000000000000000000e+04 5.430382690429687500e+02 8.975000000000000000e+01 5.275000000000000000e+01
5.800000000000000000e+01 4.787076923076921275e+02 2.433133697509765625e+02 -3.493408203125000000e+00 9.999999776482582092e-03 1.588235259056091309e+00 1.669901733398437500e+03 8.185477852821350098e-01 5.000000000000000000e+00 4.000000000000000000e+00 -7.498089355468750000e+03 5.600599365234375000e+02 9.025000000000000000e+01 5.275000000000000000e+01
4.900000000000000000e+01 5.001923076923077360e+02 2.304757995605468750e+02 -3.385589599609375000e+00 1.924369335174560547e-01 1.000000000000000000e+00 1.688577148437500000e+03 9.948794841766357422e-01 1.300000000000000000e+01 4.000000000000000000e+00 -1.000000000000000000e+04 1.007149108886718750e+03 9.075000000000000000e+01 5.275000000000000000e+01
6.400000000000000000e+01 7.043461538461542659e+02 2.862484436035156250e+02 -3.214965820312500000e+00 1.921911090612411499e-01 0.000000000000000000e+00 1.712826904296875000e+03 2.677955389022827148e+00 1.300000000000000000e+01 4.000000000000000000e+00 -1.000000000000000000e+04 1.019932434082031250e+03 9.225000000000000000e+01 5.275000000000000000e+01
6.600000000000000000e+01 7.926153846153847553e+02 3.563972167968750000e+02 -3.310852050781250000e+00 3.023690283298492432e-01 0.000000000000000000e+00 1.689133666992187500e+03 2.709455966949462891e+00 1.300000000000000000e+01 4.000000000000000000e+00 -7.499365234375000000e+03 1.128067016601562500e+03 9.275000000000000000e+01 5.275000000000000000e+01
6.300000000000000000e+01 9.284692307692304212e+02 3.896599426269531250e+02 -3.406707763671875000e+00 5.034700632095336914e-01 0.000000000000000000e+00 1.665440551757812500e+03 1.636743068695068359e+00 1.300000000000000000e+01 4.000000000000000000e+00 -1.000000000000000000e+04 1.537209838867187500e+03 9.325000000000000000e+01 5.275000000000000000e+01
2.000000000000000000e+01 8.601769230769231172e+02 3.270322875976562500e+02 -3.502593994140625000e+00 8.939266800880432129e-01 0.000000000000000000e+00 1.641747314453125000e+03 1.476657152175903320e+00 1.300000000000000000e+01 3.000000000000000000e+00 -5.004201660156250000e+03 1.652050170898437500e+03 9.375000000000000000e+01 5.275000000000000000e+01
4.600000000000000000e+01 7.777461538461539021e+02 2.817407226562500000e+02 -3.833374023437500000e+00 5.429456233978271484e-01 0.000000000000000000e+00 1.609994506835937500e+03 8.887112140655517578e-01 1.300000000000000000e+01 4.000000000000000000e+00 -1.000000000000000000e+04 1.440585937500000000e+03 9.425000000000000000e+01 5.275000000000000000e+01
6.900000000000000000e+01 6.788538461538462343e+02 2.547469787597656250e+02 -4.164154052734375000e+00 3.729951381683349609e-01 0.000000000000000000e+00 1.578241699218750000e+03 7.250691652297973633e-01 1.300000000000000000e+01 4.000000000000000000e+00 -7.500238281250000000e+03 1.325064331054687500e+03 9.475000000000000000e+01 5.275000000000000000e+01
5.500000000000000000e+01 6.124384615384614108e+02 2.200823822021484375e+02 -4.494934082031250000e+00 5.639112591743469238e-01 1.176470592617988586e-01 1.546488891601562500e+03 7.416278123855590820e-01 1.300000000000000000e+01 4.000000000000000000e+00 -1.000000000000000000e+04 1.269323120117187500e+03 9.525000000000000000e+01 5.275000000000000000e+01
6.400000000000000000e+01 5.599076923076925141e+02 1.868759155273437500e+02 -4.921020507812500000e+00 2.438851892948150635e-01 1.764705926179885864e-01 1.506176269531250000e+03 7.428250312805175781e-01 1.300000000000000000e+01 4.000000000000000000e+00 -1.000000000000000000e+04 9.853666381835937500e+02 9.575000000000000000e+01 5.275000000000000000e+01
5.200000000000000000e+01 5.312000000000000455e+02 1.708927764892578125e+02 -5.633026123046875000e+00 4.263648390769958496e-01 1.764705926179885864e-01 1.440184082031250000e+03 7.279598116874694824e-01 1.300000000000000000e+01 4.000000000000000000e+00 -1.000000000000000000e+04 1.146633422851562500e+03 9.625000000000000000e+01 5.275000000000000000e+01
5.400000000000000000e+01 5.089384615384614676e+02 1.719006652832031250e+02 -6.345031738281250000e+00 6.612716913223266602e-01 4.705882370471954346e-01 1.374191772460937500e+03 9.167389273643493652e-01 1.300000000000000000e+01 4.000000000000000000e+00 -7.501217285156250000e+03 1.415222412109375000e+03 9.675000000000000000e+01 5.275000000000000000e+01
5.900000000000000000e+01 4.727615384615384073e+02 1.830112762451171875e+02 -7.057037353515625000e+00 3.527311980724334717e-01 8.235294222831726074e-01 1.308199584960937500e+03 1.198252439498901367e+00 1.300000000000000000e+01 4.000000000000000000e+00 -1.000000000000000000e+04 1.209316650390625000e+03 9.725000000000000000e+01 5.275000000000000000e+01
3.800000000000000000e+01 4.683384615384617859e+02 1.950791625976562500e+02 -7.623168945312500000e+00 6.730391979217529297e-01 0.000000000000000000e+00 1.253121826171875000e+03 1.642223119735717773e+00 1.300000000000000000e+01 3.000000000000000000e+00 -2.506594238281250000e+03 1.338808471679687500e+03 9.775000000000000000e+01 5.275000000000000000e+01
2.500000000000000000e+01 4.893000000000004093e+02 1.826828613281250000e+02 -8.463714599609375000e+00 6.642976403236389160e-01 2.352941185235977173e-01 1.164795288085937500e+03 1.422331690788269043e+00 1.300000000000000000e+01 3.000000000000000000e+00 -7.501040039062500000e+03 1.754043823242187500e+03 9.875000000000000000e+01 5.275000000000000000e+01
4.600000000000000000e+01 4.901769230769232308e+02 1.575637054443359375e+02 -8.254882812500000000e+00 6.193462014198303223e-01 5.882353186607360840e-01 1.238247070312500000e+03 1.382734537124633789e+00 1.300000000000000000e+01 4.000000000000000000e+00 -5.004346679687500000e+03 1.793967285156250000e+03 1.002500000000000000e+02 5.275000000000000000e+01
1.600000000000000000e+01 4.865615384615380776e+02 1.825575408935546875e+02 -7.835357666015625000e+00 8.058188557624816895e-01 2.941176593303680420e-01 1.311764770507812500e+03 1.857009053230285645e+00 1.300000000000000000e+01 1.000000000000000000e+00 -7.501601562500000000e+03 1.718072753906250000e+03 1.007500000000000000e+02 5.275000000000000000e+01
1.000000000000000000e+01 4.808076923076922640e+02 2.046804504394531250e+02 -7.415832519531250000e+00 5.668660402297973633e-01 4.117647111415863037e-01 1.385282348632812500e+03 1.237914919853210449e+00 1.300000000000000000e+01 1.000000000000000000e+00 -1.000000000000000000e+04 1.555730957031250000e+03 1.012500000000000000e+02 5.275000000000000000e+01
5.700000000000000000e+01 4.934538461538461434e+02 2.114558868408203125e+02 -6.546417236328125000e+00 3.434205949306488037e-01 5.882353186607360840e-01 1.501898559570312500e+03 7.427523136138916016e-01 1.300000000000000000e+01 4.000000000000000000e+00 -1.103022003173828125e+01 1.022163757324218750e+03 1.017500000000000000e+02 5.275000000000000000e+01
1.200000000000000000e+01 4.979615384615384528e+02 2.051660308837890625e+02 -5.676971435546875000e+00 9.999999776482582092e-03 7.647058963775634766e-01 1.618514770507812500e+03 8.043885827064514160e-01 5.000000000000000000e+00 1.000000000000000000e+00 -7.500425781250000000e+03 6.185183715820312500e+02 1.022500000000000000e+02 5.275000000000000000e+01
3.400000000000000000e+01 5.404307692307691013e+02 2.028096313476562500e+02 -4.807556152343750000e+00 9.999999776482582092e-03 2.235294103622436523e+00 1.735130981445312500e+03 1.296245813369750977e+00 5.000000000000000000e+00 3.000000000000000000e+00 -4.996588867187500000e+03 4.933523864746093750e+02 1.027500000000000000e+02 5.275000000000000000e+01
3.500000000000000000e+01 5.738923076923076678e+02 1.906567687988281250e+02 -4.018737792968750000e+00 9.999999776482582092e-03 2.411764621734619141e+00 1.841471191406250000e+03 8.404391407966613770e-01 5.000000000000000000e+00 3.000000000000000000e+00 -4.996093261718750000e+03 4.583159484863281250e+02 1.032500000000000000e+02 5.275000000000000000e+01
5.200000000000000000e+01 5.521769230769231172e+02 1.655947723388671875e+02 -2.924774169921875000e+00 9.999999776482582092e-03 1.529411792755126953e+00 1.992495971679687500e+03 1.141720175743103027e+00 5.000000000000000000e+00 4.000000000000000000e+00 -7.503124023437500000e+03 5.631856689453125000e+02 1.042500000000000000e+02 5.275000000000000000e+01
8.000000000000000000e+00 5.089384615384615813e+02 1.619826812744140625e+02 -2.377777099609375000e+00 9.999999776482582092e-03 1.117647051811218262e+00 2.068008300781250000e+03 1.638473391532897949e+00 8.000000000000000000e+00 1.000000000000000000e+00 -5.010419433593750000e+03 5.417351684570312500e+02 1.047500000000000000e+02 5.275000000000000000e+01
3.900000000000000000e+01 4.926000000000001364e+02 1.679956665039062500e+02 -2.082672119140625000e+00 1.546061038970947266e-01 1.176470637321472168e+00 2.103234130859375000e+03 1.024725914001464844e+00 8.000000000000000000e+00 3.000000000000000000e+00 -7.498713378906250000e+03 6.664320068359375000e+02 1.052500000000000000e+02 5.275000000000000000e+01
5.300000000000000000e+01 3.998692307692306258e+02 1.814786834716796875e+02 -5.150421142578125000e+00 8.207916021347045898e-01 0.000000000000000000e+00 1.815779541015625000e+03 2.064390182495117188e+00 1.300000000000000000e+01 4.000000000000000000e+00 -2.494865966796875000e+03 1.374276245117187500e+03 1.087500000000000000e+02 5.275000000000000000e+01
6.900000000000000000e+01 4.087615384615384073e+02 1.720569000244140625e+02 -5.726654052734375000e+00 5.509188771247863770e-01 4.705882370471954346e-01 1.779086425781250000e+03 9.017823934555053711e-01 1.300000000000000000e+01 4.000000000000000000e+00 -1.000000000000000000e+04 1.126952636718750000e+03 1.092500000000000000e+02 5.275000000000000000e+01
3.300000000000000000e+01 4.234692307692306485e+02 1.752759857177734375e+02 -6.302886962890625000e+00 5.740540623664855957e-01 1.470588207244873047e+00 1.742393310546875000e+03 2.159242153167724609e+00 1.300000000000000000e+01 3.000000000000000000e+00 -2.495180175781250000e+03 1.165743164062500000e+03 1.097500000000000000e+02 5.275000000000000000e+01
3.900000000000000000e+01 4.126769230769230035e+02 1.947033996582031250e+02 -6.879150390625000000e+00 3.439433574676513672e-01 6.470588445663452148e-01 1.705700195312500000e+03 2.134151458740234375e+00 1.300000000000000000e+01 3.000000000000000000e+00 -2.490743652343750000e+03 1.015405639648437500e+03 1.102500000000000000e+02 5.275000000000000000e+01
2.000000000000000000e+01 4.028307692307692491e+02 1.889854736328125000e+02 -7.306365966796875000e+00 5.390160083770751953e-01 1.470588207244873047e+00 1.681556518554687500e+03 2.293824911117553711e+00 1.300000000000000000e+01 3.000000000000000000e+00 -4.990551757812500000e+03 1.201053710937500000e+03 1.107500000000000000e+02 5.275000000000000000e+01
2.800000000000000000e+01 3.872692307692305462e+02 1.603473968505859375e+02 -7.286499023437500000e+00 4.934814870357513428e-01 1.117647051811218262e+00 1.695061035156250000e+03 1.630564451217651367e+00 1.300000000000000000e+01 3.000000000000000000e+00 -7.496734863281250000e+03 1.056310668945312500e+03 1.112500000000000000e+02 5.275000000000000000e+01
1.600000000000000000e+01 3.735384615384616609e+02 1.434419250488281250e+02 -7.246734619140625000e+00 4.314874410629272461e-01 1.529411792755126953e+00 1.722069946289062500e+03 1.584828257560729980e+00 5.000000000000000000e+00 1.000000000000000000e+00 -1.000000000000000000e+04 9.923726806640625000e+02 1.122500000000000000e+02 5.275000000000000000e+01
2.200000000000000000e+01 3.341384615384616268e+02 1.386461791992187500e+02 -6.614959716796875000e+00 2.487693727016448975e-01 1.294117689132690430e+00 1.797450927734375000e+03 1.548689842224121094e+00 1.300000000000000000e+01 3.000000000000000000e+00 -1.000000000000000000e+04 9.627055053710937500e+02 1.132500000000000000e+02 5.275000000000000000e+01
1.700000000000000000e+01 3.665384615384616041e+02 1.405574493408203125e+02 -6.200408935546875000e+00 6.293699145317077637e-01 1.705882310867309570e+00 1.843203369140625000e+03 1.682143926620483398e+00 5.000000000000000000e+00 1.000000000000000000e+00 -1.000000000000000000e+04 1.170828735351562500e+03 1.137500000000000000e+02 5.275000000000000000e+01
3.500000000000000000e+01 3.826923076923077360e+02 1.459236755371093750e+02 -5.785858154296875000e+00 5.288494825363159180e-01 1.647058844566345215e+00 1.888955810546875000e+03 2.686377048492431641e+00 1.300000000000000000e+01 3.000000000000000000e+00 -1.000000000000000000e+04 1.127331176757812500e+03 1.142500000000000000e+02 5.275000000000000000e+01
3.900000000000000000e+01 3.799923076923076906e+02 1.477231903076171875e+02 -5.497222900390625000e+00 4.757279455661773682e-01 1.117647051811218262e+00 1.929580932617187500e+03 2.764215707778930664e+00 1.300000000000000000e+01 3.000000000000000000e+00 -1.000000000000000000e+04 9.475165405273437500e+02 1.147500000000000000e+02 5.275000000000000000e+01
2.800000000000000000e+01 3.748461538461540385e+02 1.470347900390625000e+02 -5.250549316406250000e+00 3.327817022800445557e-01 1.588235259056091309e+00 1.968497070312500000e+03 7.546995878219604492e-01 1.300000000000000000e+01 3.000000000000000000e+00 -1.000000000000000000e+04 8.787794189453125000e+02 1.152500000000000000e+02 5.275000000000000000e+01
1.100000000000000000e+01 3.700538461538461661e+02 1.410724792480468750e+02 -5.003906250000000000e+00 3.241931200027465820e-01 1.705882310867309570e+00 2.007413085937500000e+03 7.712087631225585938e-01 1.300000000000000000e+01 1.000000000000000000e+00 -1.000000000000000000e+04 7.432917480468750000e+02 1.157500000000000000e+02 5.275000000000000000e+01
3.600000000000000000e+01 3.837230769230768033e+02 1.305258483886718750e+02 -4.757232666015625000e+00 4.852472543716430664e-01 1.470588207244873047e+00 2.046329101562500000e+03 7.691039443016052246e-01 1.300000000000000000e+01 3.000000000000000000e+00 -1.000000000000000000e+04 8.998568725585937500e+02 1.162500000000000000e+02 5.275000000000000000e+01
3.800000000000000000e+01 3.874076923076923435e+02 1.262494201660156250e+02 -4.875305175781250000e+00 3.301568627357482910e-01 2.529411792755126953e+00 2.044566406250000000e+03 7.673101425170898438e-01 1.300000000000000000e+01 3.000000000000000000e+00 -1.000000000000000000e+04 7.371243896484375000e+02 1.167500000000000000e+02 5.275000000000000000e+01
3.300000000000000000e+01 3.961461538461538794e+02 1.270480804443359375e+02 -4.993408203125000000e+00 3.329392373561859131e-01 1.882352948188781738e+00 2.042803710937500000e+03 7.583892941474914551e-01 1.300000000000000000e+01 3.000000000000000000e+00 -1.000000000000000000e+04 7.140493774414062500e+02 1.172500000000000000e+02 5.275000000000000000e+01
2.500000000000000000e+01 4.042307692307693969e+02 1.383316802978515625e+02 -5.111480712890625000e+00 5.593962669372558594e-01 1.352941155433654785e+00 2.041041015625000000e+03 7.496309876441955566e-01 1.300000000000000000e+01 3.000000000000000000e+00 -1.000000000000000000e+04 8.234729003906250000e+02 1.177500000000000000e+02 5.275000000000000000e+01
4.700000000000000000e+01 3.956538461538463594e+02 1.479620056152343750e+02 -5.254058837890625000e+00 4.297252297401428223e-01 1.235294103622436523e+00 2.036390747070312500e+03 7.663137912750244141e-01 1.300000000000000000e+01 4.000000000000000000e+00 -1.000000000000000000e+04 7.978363037109375000e+02 1.182500000000000000e+02 5.275000000000000000e+01
2.700000000000000000e+01 4.014923076923075200e+02 1.765926208496093750e+02 -5.686309814453125000e+00 4.637817144393920898e-01 1.352941155433654785e+00 2.009763671875000000e+03 7.559157609939575195e-01 1.300000000000000000e+01 3.000000000000000000e+00 -1.000000000000000000e+04 7.425972900390625000e+02 1.192500000000000000e+02 5.275000000000000000e+01
5.700000000000000000e+01 4.056230769230768374e+02 1.944410095214843750e+02 -5.902465820312500000e+00 5.707597136497497559e-01 1.294117689132690430e+00 1.996450195312500000e+03 7.566426396369934082e-01 1.300000000000000000e+01 4.000000000000000000e+00 -4.996385742187500000e+03 8.161031494140625000e+02 1.197500000000000000e+02 5.275000000000000000e+01
6.100000000000000000e+01 4.056000000000000227e+02 2.022024230957031250e+02 -5.988708496093750000e+00 3.322481811046600342e-01 2.941176593303680420e-01 1.996833129882812500e+03 7.706468105316162109e-01 6.000000000000000000e+00 4.000000000000000000e+00 -5.004050292968750000e+03 6.047319946289062500e+02 1.202500000000000000e+02 5.275000000000000000e+01
6.400000000000000000e+01 4.176230769230770079e+02 2.080155639648437500e+02 -5.945098876953125000e+00 4.201741516590118408e-01 0.000000000000000000e+00 2.010912597656250000e+03 7.625986933708190918e-01 1.300000000000000000e+01 4.000000000000000000e+00 -1.000000000000000000e+04 6.990781250000000000e+02 1.207500000000000000e+02 5.275000000000000000e+01
1.600000000000000000e+01 4.331692307692307509e+02 2.117711181640625000e+02 -5.901458740234375000e+00 5.641587376594543457e-01 5.294117927551269531e-01 2.024992065429687500e+03 7.514544129371643066e-01 1.300000000000000000e+01 1.000000000000000000e+00 -1.000000000000000000e+04 7.949762573242187500e+02 1.212500000000000000e+02 5.275000000000000000e+01
2.300000000000000000e+01 4.253384615384614449e+02 2.111490478515625000e+02 -5.857849121093750000e+00 3.490532934665679932e-01 0.000000000000000000e+00 2.039071533203125000e+03 7.813504934310913086e-01 1.300000000000000000e+01 3.000000000000000000e+00 -2.492924316406250000e+03 6.464097900390625000e+02 1.217500000000000000e+02 5.275000000000000000e+01
3.100000000000000000e+01 4.390923076923078838e+02 2.132216491699218750e+02 -5.645782470703125000e+00 4.841967523097991943e-01 0.000000000000000000e+00 2.072106689453125000e+03 9.517825245857238770e-01 1.300000000000000000e+01 3.000000000000000000e+00 -1.000000000000000000e+04 5.804558105468750000e+02 1.222500000000000000e+02 5.275000000000000000e+01
4.400000000000000000e+01 4.502230769230768033e+02 2.168134460449218750e+02 -5.377563476562500000e+00 5.361374616622924805e-01 0.000000000000000000e+00 2.111460205078125000e+03 1.227233648300170898e+00 1.300000000000000000e+01 3.000000000000000000e+00 -4.997063964843750000e+03 6.462446289062500000e+02 1.227500000000000000e+02 5.275000000000000000e+01
3.400000000000000000e+01 4.686307692307692037e+02 2.137021789550781250e+02 -5.109344482421875000e+00 4.621712863445281982e-01 2.941176593303680420e-01 2.150813720703125000e+03 7.207299470901489258e-01 1.300000000000000000e+01 3.000000000000000000e+00 -2.492630371093750000e+03 6.271054077148437500e+02 1.232500000000000000e+02 5.275000000000000000e+01
5.100000000000000000e+01 4.806230769230767237e+02 2.055650329589843750e+02 -4.841156005859375000e+00 4.368309378623962402e-01 4.705882370471954346e-01 2.190167236328125000e+03 7.259177565574645996e-01 1.300000000000000000e+01 4.000000000000000000e+00 1.256179332733154297e+01 5.887023925781250000e+02 1.237500000000000000e+02 5.275000000000000000e+01
5.600000000000000000e+01 4.729461538461539476e+02 1.958897399902343750e+02 -4.543457031250000000e+00 3.693859279155731201e-01 5.882352963089942932e-02 2.233780273437500000e+03 7.554218769073486328e-01 1.300000000000000000e+01 4.000000000000000000e+00 1.244551181793212891e+01 5.001271667480468750e+02 1.242500000000000000e+02 5.275000000000000000e+01
4.600000000000000000e+01 4.715999999999999659e+02 1.909640808105468750e+02 -4.245788574218750000e+00 4.879790544509887695e-01 5.882352963089942932e-02 2.277393554687500000e+03 7.801321744918823242e-01 1.300000000000000000e+01 4.000000000000000000e+00 -4.995386718750000000e+03 6.458042602539062500e+02 1.247500000000000000e+02 5.275000000000000000e+01
2.600000000000000000e+01 4.655692307692306713e+02 1.957658691406250000e+02 -3.948120117187500000e+00 2.038011401891708374e-01 5.882353186607360840e-01 2.321006591796875000e+03 8.071419000625610352e-01 1.300000000000000000e+01 3.000000000000000000e+00 -4.993197265625000000e+03 3.352034301757812500e+02 1.252500000000000000e+02 5.275000000000000000e+01
3.000000000000000000e+01 4.607999999999999545e+02 1.988162689208984375e+02 -3.716644287109375000e+00 2.222853302955627441e-01 1.411764740943908691e+00 2.354068115234375000e+03 8.261988759040832520e-01 5.000000000000000000e+00 3.000000000000000000e+00 -4.980548828125000000e+03 3.603043823242187500e+02 1.257500000000000000e+02 5.275000000000000000e+01
3.600000000000000000e+01 4.687923076923079293e+02 1.995843505859375000e+02 -3.683898925781250000e+00 1.975085139274597168e-01 1.235294103622436523e+00 2.355475585937500000e+03 8.346800804138183594e-01 4.000000000000000000e+00 3.000000000000000000e+00 -7.498432128906250000e+03 3.030542907714843750e+02 1.262500000000000000e+02 5.275000000000000000e+01
2.800000000000000000e+01 4.965384615384614904e+02 2.040696563720703125e+02 -3.651123046875000000e+00 1.886959671974182129e-01 1.764705896377563477e+00 2.356883056640625000e+03 8.390663862228393555e-01 3.000000000000000000e+00 3.000000000000000000e+00 -7.496376464843750000e+03 3.195805969238281250e+02 1.267500000000000000e+02 5.275000000000000000e+01
3.300000000000000000e+01 5.208384615384616154e+02 2.154393463134765625e+02 -3.618347167968750000e+00 1.871081292629241943e-01 1.470588207244873047e+00 2.358290283203125000e+03 8.452482223510742188e-01 3.000000000000000000e+00 3.000000000000000000e+00 -2.496059082031250000e+03 2.940070190429687500e+02 1.272500000000000000e+02 5.275000000000000000e+01
2.900000000000000000e+01 5.400230769230770420e+02 2.371055603027343750e+02 -3.752685546875000000e+00 1.662268787622451782e-01 1.058823585510253906e+00 2.334792968750000000e+03 8.511493802070617676e-01 3.000000000000000000e+00 3.000000000000000000e+00 1.802257919311523438e+01 2.238945617675781250e+02 1.277500000000000000e+02 5.275000000000000000e+01
2.500000000000000000e+01 5.717153846153843233e+02 2.566282348632812500e+02 -4.054138183593750000e+00 1.986549198627471924e-01 8.823529481887817383e-01 2.286390625000000000e+03 8.503028750419616699e-01 3.000000000000000000e+00 3.000000000000000000e+00 -2.485787597656250000e+03 3.035402221679687500e+02 1.282500000000000000e+02 5.275000000000000000e+01
4.000000000000000000e+01 5.903153846153849145e+02 2.643668212890625000e+02 -4.355590820312500000e+00 2.022651582956314087e-01 1.058823585510253906e+00 2.237988281250000000e+03 8.496496081352233887e-01 1.500000000000000000e+01 3.000000000000000000e+00 -7.498929687500000000e+03 3.122271423339843750e+02 1.287500000000000000e+02 5.275000000000000000e+01
4.900000000000000000e+01 5.834692307692308759e+02 2.619075622558593750e+02 -4.657043457031250000e+00 1.857509464025497437e-01 1.235294103622436523e+00 2.189585937500000000e+03 8.487749099731445312e-01 1.500000000000000000e+01 4.000000000000000000e+00 -4.992995605468750000e+03 2.483006896972656250e+02 1.292500000000000000e+02 5.275000000000000000e+01
3.500000000000000000e+01 5.658153846153844597e+02 2.499068908691406250e+02 -5.047729492187500000e+00 2.733844816684722900e-01 1.058823585510253906e+00 2.132885498046875000e+03 1.027213692665100098e+00 1.500000000000000000e+01 3.000000000000000000e+00 -4.994336425781250000e+03 3.362568054199218750e+02 1.297500000000000000e+02 5.275000000000000000e+01
2.900000000000000000e+01 5.776923076923073950e+02 2.520754241943359375e+02 -5.468139648437500000e+00 2.397228181362152100e-01 1.000000000000000000e+00 2.073418945312500000e+03 2.073803424835205078e+00 3.000000000000000000e+00 3.000000000000000000e+00 -4.995441894531250000e+03 2.706803283691406250e+02 1.302500000000000000e+02 5.275000000000000000e+01
3.000000000000000000e+01 6.041076923076924459e+02 2.619062805175781250e+02 -5.888549804687500000e+00 2.972935736179351807e-01 1.058823585510253906e+00 2.013952514648437500e+03 2.045010089874267578e+00 1.500000000000000000e+01 3.000000000000000000e+00 1.544777202606201172e+01 3.437188720703125000e+02 1.307500000000000000e+02 5.275000000000000000e+01
1.900000000000000000e+01 6.316769230769234582e+02 2.738246154785156250e+02 -6.308959960937500000e+00 3.825841546058654785e-01 1.000000000000000000e+00 1.954485961914062500e+03 1.988810062408447266e+00 1.500000000000000000e+01 1.000000000000000000e+00 -1.000000000000000000e+04 3.733165283203125000e+02 1.312500000000000000e+02 5.275000000000000000e+01
2.200000000000000000e+01 6.449846153846151537e+02 2.842997131347656250e+02 -6.564605712890625000e+00 4.006689190864562988e-01 3.529411852359771729e-01 1.910519897460937500e+03 1.936982512474060059e+00 1.300000000000000000e+01 3.000000000000000000e+00 -5.003047363281250000e+03 4.367431335449218750e+02 1.317500000000000000e+02 5.275000000000000000e+01
7.000000000000000000e+01 6.634692307692305349e+02 2.938633117675781250e+02 -6.820220947265625000e+00 5.716885924339294434e-01 5.882352963089942932e-02 1.866553833007812500e+03 1.068693161010742188e+00 1.300000000000000000e+01 4.000000000000000000e+00 -1.000000000000000000e+04 5.747363281250000000e+02 1.322500000000000000e+02 5.275000000000000000e+01
5.600000000000000000e+01 6.865615384615382482e+02 3.055017089843750000e+02 -7.075836181640625000e+00 5.679397583007812500e-01 2.941176593303680420e-01 1.822587768554687500e+03 1.784114599227905273e+00 1.300000000000000000e+01 4.000000000000000000e+00 -7.501979492187500000e+03 6.387772827148437500e+02 1.327500000000000000e+02 5.275000000000000000e+01
1.700000000000000000e+01 6.952769230769231399e+02 3.126439208984375000e+02 -7.252136230468750000e+00 8.600563406944274902e-01 8.823529481887817383e-01 1.785637695312500000e+03 1.694915771484375000e+00 1.300000000000000000e+01 1.000000000000000000e+00 2.052915763854980469e+01 1.085663330078125000e+03 1.332500000000000000e+02 5.275000000000000000e+01
3.300000000000000000e+01 7.023461538461536975e+02 3.211307983398437500e+02 -7.190460205078125000e+00 7.384014129638671875e-01 5.294117927551269531e-01 1.769735473632812500e+03 1.623760104179382324e+00 1.300000000000000000e+01 3.000000000000000000e+00 -2.493135009765625000e+03 8.351943359375000000e+02 1.337500000000000000e+02 5.275000000000000000e+01
2.600000000000000000e+01 7.054615384615384528e+02 3.263600463867187500e+02 -7.128753662109375000e+00 8.812175393104553223e-01 1.176470592617988586e-01 1.753833251953125000e+03 1.461815237998962402e+00 1.300000000000000000e+01 3.000000000000000000e+00 -4.993774902343750000e+03 1.037280639648437500e+03 1.342500000000000000e+02 5.275000000000000000e+01
1.900000000000000000e+01 7.130307692307690104e+02 3.276199951171875000e+02 -7.067047119140625000e+00 9.700497984886169434e-01 0.000000000000000000e+00 1.737931152343750000e+03 1.216447830200195312e+00 1.300000000000000000e+01 1.000000000000000000e+00 -4.990762207031250000e+03 1.526672363281250000e+03 1.347500000000000000e+02 5.275000000000000000e+01
5.900000000000000000e+01 6.933538461538463480e+02 3.170025329589843750e+02 -6.799041748046875000e+00 8.125079870223999023e-01 6.470588445663452148e-01 1.752828979492187500e+03 1.326297879219055176e+00 1.300000000000000000e+01 4.000000000000000000e+00 1.430766391754150391e+01 8.661310424804687500e+02 1.352500000000000000e+02 5.275000000000000000e+01
3.100000000000000000e+01 6.542384615384614790e+02 3.105731811523437500e+02 -6.324676513671875000e+00 3.216453194618225098e-01 0.000000000000000000e+00 1.798526977539062500e+03 1.605097174644470215e+00 1.500000000000000000e+01 3.000000000000000000e+00 -4.985599121093750000e+03 3.175918579101562500e+02 1.357500000000000000e+02 5.275000000000000000e+01
2.500000000000000000e+01 6.109230769230769056e+02 2.917618408203125000e+02 -5.850311279296875000e+00 1.545184105634689331e-01 4.117647111415863037e-01 1.844224853515625000e+03 1.607040166854858398e+00 1.500000000000000000e+01 3.000000000000000000e+00 -2.487968261718750000e+03 8.177995300292968750e+01 1.362500000000000000e+02 5.275000000000000000e+01
2.800000000000000000e+01 6.033076923076923777e+02 2.716204223632812500e+02 -5.375946044921875000e+00 1.608943045139312744e-01 6.470588445663452148e-01 1.889922851562500000e+03 1.645931482315063477e+00 1.500000000000000000e+01 3.000000000000000000e+00 1.382569122314453125e+01 9.009360504150390625e+01 1.367500000000000000e+02 5.275000000000000000e+01
5.400000000000000000e+01 6.185153846153848463e+02 2.593936767578125000e+02 -4.938232421875000000e+00 4.578360915184020996e-01 1.764705926179885864e-01 1.905823974609375000e+03 1.699571728706359863e+00 1.300000000000000000e+01 4.000000000000000000e+00 -4.994182617187500000e+03 4.778794860839843750e+02 1.372500000000000000e+02 5.275000000000000000e+01
4.800000000000000000e+01 6.351153846153847553e+02 2.563212585449218750e+02 -4.512725830078125000e+00 2.404951751232147217e-01 5.294117927551269531e-01 1.911792846679687500e+03 9.058697819709777832e-01 1.300000000000000000e+01 4.000000000000000000e+00 -2.486924072265625000e+03 2.718290710449218750e+02 1.377500000000000000e+02 5.275000000000000000e+01
5.400000000000000000e+01 6.437538461538462116e+02 2.641005249023437500e+02 -4.087219238281250000e+00 2.342860698699951172e-01 4.705882370471954346e-01 1.917761718750000000e+03 8.609180450439453125e-01 1.300000000000000000e+01 4.000000000000000000e+00 -4.994107421875000000e+03 1.758980255126953125e+02 1.382500000000000000e+02 5.275000000000000000e+01
5.700000000000000000e+01 6.600384615384616609e+02 2.763842773437500000e+02 -3.661712646484375000e+00 3.070903122425079346e-01 7.058823704719543457e-01 1.923730468750000000e+03 7.735236287117004395e-01 1.300000000000000000e+01 4.000000000000000000e+00 -7.501415527343750000e+03 4.093399658203125000e+02 1.387500000000000000e+02 5.275000000000000000e+01
1.300000000000000000e+01 6.523461538461541522e+02 2.898274841308593750e+02 -3.264099121093750000e+00 9.999999776482582092e-03 0.000000000000000000e+00 1.942469360351562500e+03 7.887596487998962402e-01 1.500000000000000000e+01 1.000000000000000000e+00 2.800543212890625000e+01 2.639602088928222656e+01 1.392500000000000000e+02 5.275000000000000000e+01
1.000000000000000000e+01 6.546000000000002501e+02 3.003777160644531250e+02 -2.866485595703125000e+00 9.999999776482582092e-03 1.411764740943908691e+00 1.961208251953125000e+03 9.456201791763305664e-01 1.500000000000000000e+01 1.000000000000000000e+00 1.959340095520019531e+01 6.694229888916015625e+01 1.397500000000000000e+02 5.275000000000000000e+01
5.600000000000000000e+01 6.605692307692307850e+02 3.159356994628906250e+02 -2.468872070312500000e+00 1.186434775590896606e-01 4.117647111415863037e-01 1.979947143554687500e+03 1.843673348426818848e+00 8.000000000000000000e+00 4.000000000000000000e+00 -2.490272705078125000e+03 1.811957550048828125e+02 1.402500000000000000e+02 5.275000000000000000e+01
5.700000000000000000e+01 6.718461538461538112e+02 3.284543762207031250e+02 -2.117034912109375000e+00 2.169694751501083374e-01 1.764705926179885864e-01 1.988156738281250000e+03 1.669115424156188965e+00 1.300000000000000000e+01 4.000000000000000000e+00 -1.000000000000000000e+04 4.748389587402343750e+02 1.407500000000000000e+02 5.275000000000000000e+01
3.000000000000000000e+01 6.223615384615378616e+02 3.550832519531250000e+02 -1.473388671875000000e+00 9.999999776482582092e-03 0.000000000000000000e+00 1.918021972656250000e+03 1.858896255493164062e+00 5.000000000000000000e+00 3.000000000000000000e+00 1.607746696472167969e+01 1.151207656860351562e+02 1.422500000000000000e+02 5.275000000000000000e+01
1.400000000000000000e+01 6.668153846153848008e+02 3.797164611816406250e+02 -1.342163085937500000e+00 9.999999776482582092e-03 0.000000000000000000e+00 1.854791870117187500e+03 1.769103765487670898e+00 5.000000000000000000e+00 1.000000000000000000e+00 -7.497247070312500000e+03 5.489181518554687500e+01 1.427500000000000000e+02 5.275000000000000000e+01
3.500000000000000000e+01 8.733846153846158131e+02 4.849203796386718750e+02 2.645263671875000000e-01 0.000000000000000000e+00 0.000000000000000000e+00 1.281086547851562500e+03 7.159920930862426758e-01 4.000000000000000000e+00 3.000000000000000000e+00 -4.991888671875000000e+03 1.939093017578125000e+02 1.567500000000000000e+02 5.275000000000000000e+01
1.400000000000000000e+01 8.571153846153843006e+02 5.211207885742187500e+02 -3.503723144531250000e-01 0.000000000000000000e+00 0.000000000000000000e+00 1.251310302734375000e+03 1.215163469314575195e+00 1.200000000000000000e+01 1.000000000000000000e+00 -7.498135742187500000e+03 2.173713836669921875e+02 1.572500000000000000e+02 5.275000000000000000e+01
2.200000000000000000e+01 8.727230769230766327e+02 5.468983154296875000e+02 -4.279479980468750000e-01 9.999999776482582092e-03 0.000000000000000000e+00 1.249495117187500000e+03 1.065263271331787109e+00 1.200000000000000000e+01 3.000000000000000000e+00 -7.498179199218750000e+03 6.409452514648437500e+02 1.577500000000000000e+02 5.275000000000000000e+01
5.000000000000000000e+00 9.359153846153844825e+02 5.654950561523437500e+02 3.186035156250000000e-02 9.999999776482582092e-03 0.000000000000000000e+00 1.275640991210937500e+03 1.018406033515930176e+00 1.200000000000000000e+01 1.000000000000000000e+00 -7.497867187500000000e+03 4.521339111328125000e+02 1.582500000000000000e+02 5.275000000000000000e+01
1.000000000000000000e+00 3.254923076923078042e+02 1.613303833007812500e+02 8.606567382812500000e-01 0.000000000000000000e+00 2.647058725357055664e+00 2.790258300781250000e+03 3.471477508544921875e+00 3.000000000000000000e+00 1.000000000000000000e+00 -1.000000000000000000e+04 2.513612976074218750e+02 7.025000000000000000e+01 5.325000000000000000e+01
1.000000000000000000e+00 3.334461538461539476e+02 1.682039337158203125e+02 9.065551757812500000e-01 0.000000000000000000e+00 2.823529481887817383e+00 2.791060791015625000e+03 3.530591249465942383e+00 3.000000000000000000e+00 1.000000000000000000e+00 -1.000000000000000000e+04 2.253272094726562500e+02 7.125000000000000000e+01 5.325000000000000000e+01
1.000000000000000000e+00 3.424846153846153811e+02 1.675736389160156250e+02 1.124389648437500000e+00 0.000000000000000000e+00 2.941176414489746094e+00 2.831454589843750000e+03 3.569933176040649414e+00 3.000000000000000000e+00 1.000000000000000000e+00 -1.390312385559082031e+01 7.321512603759765625e+01 7.275000000000000000e+01 5.325000000000000000e+01
1.000000000000000000e+00 3.402923076923077019e+02 1.681801757812500000e+02 1.245544433593750000e+00 0.000000000000000000e+00 3.117647171020507812e+00 2.859199951171875000e+03 3.577440261840820312e+00 3.000000000000000000e+00 1.000000000000000000e+00 -2.516835205078125000e+03 9.789241790771484375e+01 7.375000000000000000e+01 5.325000000000000000e+01
3.000000000000000000e+00 3.179538461538460297e+02 1.561547546386718750e+02 1.352203369140625000e+00 0.000000000000000000e+00 2.882352828979492188e+00 2.887435058593750000e+03 3.579299688339233398e+00 3.000000000000000000e+00 1.000000000000000000e+00 -2.523951660156250000e+03 1.178117980957031250e+02 7.475000000000000000e+01 5.325000000000000000e+01
1.000000000000000000e+00 3.024153846153845961e+02 1.484391632080078125e+02 1.361785888671875000e+00 0.000000000000000000e+00 2.352941274642944336e+00 2.896814208984375000e+03 3.577240943908691406e+00 4.000000000000000000e+00 1.000000000000000000e+00 -5.012234375000000000e+03 1.031621322631835938e+02 7.525000000000000000e+01 5.325000000000000000e+01
1.000000000000000000e+00 2.851538461538461320e+02 1.652336730957031250e+02 9.901428222656250000e-01 0.000000000000000000e+00 1.235294103622436523e+00 2.892653808593750000e+03 3.581109285354614258e+00 4.000000000000000000e+00 1.000000000000000000e+00 -5.006834472656250000e+03 1.260058364868164062e+02 7.875000000000000000e+01 5.325000000000000000e+01
1.100000000000000000e+01 3.973461538461536406e+02 1.814290924072265625e+02 8.684692382812500000e-01 0.000000000000000000e+00 1.411764740943908691e+00 2.779051025390625000e+03 3.530730009078979492e+00 3.000000000000000000e+00 1.000000000000000000e+00 -1.000000000000000000e+04 1.173812026977539062e+02 8.075000000000000000e+01 5.325000000000000000e+01
5.800000000000000000e+01 4.868307692307689649e+02 2.355259704589843750e+02 4.282226562500000000e-01 0.000000000000000000e+00 1.058823585510253906e+00 2.448484130859375000e+03 3.127766847610473633e+00 8.000000000000000000e+00 4.000000000000000000e+00 -1.000050000000000000e+04 1.635261535644531250e+02 8.375000000000000000e+01 5.325000000000000000e+01
4.000000000000000000e+00 5.402461538461537884e+02 2.760765686035156250e+02 -2.593078613281250000e-01 0.000000000000000000e+00 1.823529362678527832e+00 2.227269775390625000e+03 3.515087127685546875e+00 8.000000000000000000e+00 1.000000000000000000e+00 -1.000000000000000000e+04 2.579425964355468750e+02 8.525000000000000000e+01 5.325000000000000000e+01
6.200000000000000000e+01 5.484769230769230717e+02 3.370042724609375000e+02 -1.213104248046875000e+00 0.000000000000000000e+00 0.000000000000000000e+00 2.011350585937500000e+03 9.122024774551391602e-01 5.000000000000000000e+00 4.000000000000000000e+00 -1.000000000000000000e+04 2.451495513916015625e+02 8.675000000000000000e+01 5.325000000000000000e+01
5.700000000000000000e+01 5.515692307692308987e+02 3.500057983398437500e+02 -1.555999755859375000e+00 0.000000000000000000e+00 0.000000000000000000e+00 1.950454223632812500e+03 9.011100530624389648e-01 5.000000000000000000e+00 4.000000000000000000e+00 -1.000000000000000000e+04 3.506915893554687500e+02 8.725000000000000000e+01 5.325000000000000000e+01
5.800000000000000000e+01 5.509000000000003183e+02 3.542489013671875000e+02 -1.898864746093750000e+00 0.000000000000000000e+00 0.000000000000000000e+00 1.889557861328125000e+03 8.625823855400085449e-01 1.300000000000000000e+01 4.000000000000000000e+00 -1.000000000000000000e+04 4.461045227050781250e+02 8.775000000000000000e+01 5.325000000000000000e+01
6.400000000000000000e+01 5.698153846153846871e+02 3.425245361328125000e+02 -2.199249267578125000e+00 1.363471895456314087e-01 0.000000000000000000e+00 1.840321655273437500e+03 8.153075575828552246e-01 1.300000000000000000e+01 4.000000000000000000e+00 -1.000000000000000000e+04 6.862550048828125000e+02 8.825000000000000000e+01 5.325000000000000000e+01
5.800000000000000000e+01 5.481999999999999318e+02 3.206916809082031250e+02 -2.372100830078125000e+00 9.999999776482582092e-03 2.941176593303680420e-01 1.826065917968750000e+03 8.003289699554443359e-01 1.300000000000000000e+01 4.000000000000000000e+00 -7.501424316406250000e+03 6.323842163085937500e+02 8.875000000000000000e+01 5.325000000000000000e+01
6.600000000000000000e+01 5.296615384615386120e+02 2.807938232421875000e+02 -2.544921875000000000e+00 1.203096359968185425e-01 0.000000000000000000e+00 1.811810302734375000e+03 7.953624129295349121e-01 1.300000000000000000e+01 4.000000000000000000e+00 -1.000000000000000000e+04 8.148885498046875000e+02 8.925000000000000000e+01 5.325000000000000000e+01
5.000000000000000000e+01 5.343153846153844597e+02 2.312713012695312500e+02 -2.717773437500000000e+00 1.378663033246994019e-01 5.882352963089942932e-02 1.797554565429687500e+03 9.637921452522277832e-01 1.300000000000000000e+01 4.000000000000000000e+00 -1.000000000000000000e+04 9.667906494140625000e+02 8.975000000000000000e+01 5.325000000000000000e+01
2.000000000000000000e+00 4.851769230769230035e+02 1.903436584472656250e+02 -2.810668945312500000e+00 0.000000000000000000e+00 1.411764740943908691e+00 1.794415283203125000e+03 3.293239831924438477e+00 4.000000000000000000e+00 1.000000000000000000e+00 -2.513894531250000000e+03 3.180578002929687500e+02 9.075000000000000000e+01 5.325000000000000000e+01
1.300000000000000000e+01 4.914076923076926278e+02 1.987073364257812500e+02 -2.815002441406250000e+00 0.000000000000000000e+00 1.705882310867309570e+00 1.797074218750000000e+03 3.123557329177856445e+00 4.000000000000000000e+00 1.000000000000000000e+00 -2.519959716796875000e+03 2.982615966796875000e+02 9.125000000000000000e+01 5.325000000000000000e+01
6.100000000000000000e+01 5.944076923076920593e+02 2.729605102539062500e+02 -2.935211181640625000e+00 0.000000000000000000e+00 1.294117689132690430e+00 1.778828491210937500e+03 3.366557359695434570e+00 1.300000000000000000e+01 4.000000000000000000e+00 -4.994635742187500000e+03 3.303323974609375000e+02 9.225000000000000000e+01 5.325000000000000000e+01
3.400000000000000000e+01 6.412846153846149946e+02 3.254527282714843750e+02 -3.088226318359375000e+00 0.000000000000000000e+00 1.000000000000000000e+00 1.750069335937500000e+03 1.732992529869079590e+00 8.000000000000000000e+00 3.000000000000000000e+00 -7.500615234375000000e+03 3.256233215332031250e+02 9.275000000000000000e+01 5.325000000000000000e+01
5.700000000000000000e+01 6.998076923076921503e+02 3.821733093261718750e+02 -3.241271972656250000e+00 0.000000000000000000e+00 1.705882310867309570e+00 1.721310180664062500e+03 8.490319252014160156e-01 1.300000000000000000e+01 4.000000000000000000e+00 -2.503283935546875000e+03 3.615903930664062500e+02 9.325000000000000000e+01 5.325000000000000000e+01
6.200000000000000000e+01 7.689538461538462570e+02 3.644999694824218750e+02 -3.394317626953125000e+00 9.999999776482582092e-03 0.000000000000000000e+00 1.692551025390625000e+03 8.051851391792297363e-01 1.300000000000000000e+01 4.000000000000000000e+00 -1.000000000000000000e+04 6.176619262695312500e+02 9.375000000000000000e+01 5.325000000000000000e+01
5.500000000000000000e+01 7.151307692307690331e+02 3.471518249511718750e+02 -3.721252441406250000e+00 2.651187181472778320e-01 0.000000000000000000e+00 1.656686523437500000e+03 7.754917740821838379e-01 1.300000000000000000e+01 4.000000000000000000e+00 -1.000000000000000000e+04 9.385341796875000000e+02 9.425000000000000000e+01 5.325000000000000000e+01
3.300000000000000000e+01 6.943692307692309669e+02 3.232324523925781250e+02 -4.048187255859375000e+00 2.582449913024902344e-01 2.941176593303680420e-01 1.620822143554687500e+03 1.072382330894470215e+00 1.300000000000000000e+01 3.000000000000000000e+00 -5.005224121093750000e+03 1.093514526367187500e+03 9.475000000000000000e+01 5.325000000000000000e+01
4.000000000000000000e+01 6.567307692307693969e+02 2.828857421875000000e+02 -4.375091552734375000e+00 4.146382212638854980e-01 0.000000000000000000e+00 1.584957641601562500e+03 1.418789029121398926e+00 1.300000000000000000e+01 3.000000000000000000e+00 -1.000000000000000000e+04 1.269030395507812500e+03 9.525000000000000000e+01 5.325000000000000000e+01
3.700000000000000000e+01 6.165692307692310123e+02 2.392231140136718750e+02 -4.758728027343750000e+00 4.274859726428985596e-01 0.000000000000000000e+00 1.544973754882812500e+03 6.901721954345703125e-01 1.300000000000000000e+01 3.000000000000000000e+00 -1.000000000000000000e+04 1.164848510742187500e+03 9.575000000000000000e+01 5.325000000000000000e+01
3.800000000000000000e+01 5.787846153846155630e+02 2.147042236328125000e+02 -5.312438964843750000e+00 5.618312358856201172e-01 0.000000000000000000e+00 1.492631225585937500e+03 1.254174709320068359e+00 1.300000000000000000e+01 3.000000000000000000e+00 -5.002260253906250000e+03 1.362099609375000000e+03 9.625000000000000000e+01 5.325000000000000000e+01
2.500000000000000000e+01 5.683692307692306258e+02 2.129452362060546875e+02 -5.866180419921875000e+00 6.545869112014770508e-01 0.000000000000000000e+00 1.440288696289062500e+03 2.190971374511718750e+00 1.300000000000000000e+01 3.000000000000000000e+00 -1.000000000000000000e+04 1.598584106445312500e+03 9.675000000000000000e+01 5.325000000000000000e+01
4.900000000000000000e+01 5.412000000000001592e+02 2.224911346435546875e+02 -6.419891357421875000e+00 5.769220590591430664e-01 2.941176593303680420e-01 1.387946166992187500e+03 7.621005773544311523e-01 1.300000000000000000e+01 4.000000000000000000e+00 -1.000000000000000000e+04 1.511003540039062500e+03 9.725000000000000000e+01 5.325000000000000000e+01
6.000000000000000000e+00 5.355307692307695788e+02 2.343014678955078125e+02 -6.840698242187500000e+00 9.515556097030639648e-01 0.000000000000000000e+00 1.348665283203125000e+03 1.307033419609069824e+00 1.300000000000000000e+01 1.000000000000000000e+00 -5.004518066406250000e+03 1.889929199218750000e+03 9.775000000000000000e+01 5.325000000000000000e+01
3.700000000000000000e+01 5.161923076923077360e+02 2.376255645751953125e+02 -7.128631591796875000e+00 9.949734807014465332e-01 5.882352963089942932e-02 1.322445922851562500e+03 2.158198118209838867e+00 1.300000000000000000e+01 3.000000000000000000e+00 -1.000000000000000000e+04 1.879663208007812500e+03 9.825000000000000000e+01 5.325000000000000000e+01
1.600000000000000000e+01 5.091384615384613426e+02 2.300604400634765625e+02 -7.416564941406250000e+00 8.280733227729797363e-01 0.000000000000000000e+00 1.296226562500000000e+03 2.102964162826538086e+00 1.300000000000000000e+01 1.000000000000000000e+00 -1.000000000000000000e+04 1.768910888671875000e+03 9.875000000000000000e+01 5.325000000000000000e+01
4.000000000000000000e+01 5.014769230769228443e+02 2.163370056152343750e+02 -7.704498291015625000e+00 6.494227051734924316e-01 0.000000000000000000e+00 1.270007202148437500e+03 2.111201047897338867e+00 1.300000000000000000e+01 3.000000000000000000e+00 -2.503746582031250000e+03 1.540471679687500000e+03 9.925000000000000000e+01 5.325000000000000000e+01
4.700000000000000000e+01 4.810538461538459956e+02 2.029225311279296875e+02 -7.498107910156250000e+00 5.920737981796264648e-01 5.294117927551269531e-01 1.313128540039062500e+03 2.254692554473876953e+00 1.300000000000000000e+01 4.000000000000000000e+00 -1.000000000000000000e+04 1.683631591796875000e+03 9.975000000000000000e+01 5.325000000000000000e+01
1.400000000000000000e+01 4.634000000000000341e+02 2.012157135009765625e+02 -7.126953125000000000e+00 8.732070922851562500e-01 0.000000000000000000e+00 1.379363525390625000e+03 1.503406405448913574e+00 1.300000000000000000e+01 1.000000000000000000e+00 -1.000000000000000000e+04 1.713490356445312500e+03 1.002500000000000000e+02 5.325000000000000000e+01
5.400000000000000000e+01 4.437846153846154493e+02 2.141215972900390625e+02 -6.755798339843750000e+00 4.455328285694122314e-01 0.000000000000000000e+00 1.445598388671875000e+03 7.042933106422424316e-01 1.300000000000000000e+01 4.000000000000000000e+00 -7.502233398437500000e+03 1.065027587890625000e+03 1.007500000000000000e+02 5.325000000000000000e+01
6.800000000000000000e+01 4.326538461538460751e+02 2.237520599365234375e+02 -6.384643554687500000e+00 1.959970593452453613e-01 8.823529481887817383e-01 1.511833374023437500e+03 7.664465904235839844e-01 1.300000000000000000e+01 4.000000000000000000e+00 -2.505842529296875000e+03 8.897929077148437500e+02 1.012500000000000000e+02 5.325000000000000000e+01
6.100000000000000000e+01 4.390461538461537430e+02 2.167874755859375000e+02 -5.680297851562500000e+00 9.999999776482582092e-03 7.058823704719543457e-01 1.611230224609375000e+03 8.096511363983154297e-01 5.000000000000000000e+00 4.000000000000000000e+00 -1.000000000000000000e+04 5.749574584960937500e+02 1.017500000000000000e+02 5.325000000000000000e+01
4.600000000000000000e+01 5.526538461538463025e+02 1.714706573486328125e+02 -3.264282226562500000e+00 9.999999776482582092e-03 1.588235259056091309e+00 1.957969970703125000e+03 2.174578428268432617e+00 8.000000000000000000e+00 4.000000000000000000e+00 -1.955333709716796875e+01 5.746273803710937500e+02 1.037500000000000000e+02 5.325000000000000000e+01
4.900000000000000000e+01 5.271384615384615699e+02 1.654872589111328125e+02 -2.881042480468750000e+00 1.391475796699523926e-01 1.235294103622436523e+00 2.016688842773437500e+03 7.942422628402709961e-01 5.000000000000000000e+00 4.000000000000000000e+00 -1.000000000000000000e+04 6.638843994140625000e+02 1.042500000000000000e+02 5.325000000000000000e+01
4.500000000000000000e+01 4.993307692307691923e+02 1.645693054199218750e+02 -2.497772216796875000e+00 2.045020312070846558e-01 9.411764740943908691e-01 2.075407714843750000e+03 7.955067157745361328e-01 1.300000000000000000e+01 4.000000000000000000e+00 -1.000000000000000000e+04 8.837952880859375000e+02 1.047500000000000000e+02 5.325000000000000000e+01
2.600000000000000000e+01 4.602230769230769738e+02 1.662863006591796875e+02 -2.347229003906250000e+00 2.728917002677917480e-01 1.529411792755126953e+00 2.096286132812500000e+03 1.532390356063842773e+00 1.300000000000000000e+01 3.000000000000000000e+00 -7.505115722656250000e+03 8.537316894531250000e+02 1.052500000000000000e+02 5.325000000000000000e+01
1.800000000000000000e+01 4.139153846153845393e+02 1.512123260498046875e+02 -2.511474609375000000e+00 2.628399133682250977e-01 1.000000000000000000e+00 2.062362060546875000e+03 8.734539151191711426e-01 1.300000000000000000e+01 1.000000000000000000e+00 -2.487904785156250000e+03 9.286670532226562500e+02 1.062500000000000000e+02 5.325000000000000000e+01
5.100000000000000000e+01 4.124692307692306485e+02 1.833179168701171875e+02 -7.009979248046875000e+00 6.041075587272644043e-01 5.882353186607360840e-01 1.671537109375000000e+03 7.893083095550537109e-01 1.300000000000000000e+01 4.000000000000000000e+00 -1.000000000000000000e+04 1.134911010742187500e+03 1.097500000000000000e+02 5.325000000000000000e+01
4.600000000000000000e+01 4.098307692307690786e+02 1.993339843750000000e+02 -7.609436035156250000e+00 8.592261075973510742e-01 1.294117689132690430e+00 1.630726562500000000e+03 1.357181072235107422e+00 1.300000000000000000e+01 4.000000000000000000e+00 -7.504501953125000000e+03 1.423371826171875000e+03 1.102500000000000000e+02 5.325000000000000000e+01
2.100000000000000000e+01 4.259846153846152674e+02 1.929301147460937500e+02 -8.068359375000000000e+00 9.516208767890930176e-01 8.235294222831726074e-01 1.601282714843750000e+03 2.424572706222534180e+00 1.300000000000000000e+01 3.000000000000000000e+00 -1.000000000000000000e+04 1.450862548828125000e+03 1.107500000000000000e+02 5.325000000000000000e+01
2.300000000000000000e+01 4.110000000000001137e+02 1.644683074951171875e+02 -8.105804443359375000e+00 6.815817952156066895e-01 1.176470637321472168e+00 1.605938720703125000e+03 2.437531709671020508e+00 1.300000000000000000e+01 3.000000000000000000e+00 -1.000000000000000000e+04 1.249802978515625000e+03 1.112500000000000000e+02 5.325000000000000000e+01
3.300000000000000000e+01 4.006769230769231172e+02 1.506859130859375000e+02 -8.143218994140625000e+00 5.764875411987304688e-01 1.294117689132690430e+00 1.610594604492187500e+03 1.397937774658203125e+00 1.300000000000000000e+01 3.000000000000000000e+00 -1.000000000000000000e+04 1.113097167968750000e+03 1.117500000000000000e+02 5.325000000000000000e+01
2.800000000000000000e+01 3.652076923076921275e+02 1.478453063964843750e+02 -8.002532958984375000e+00 4.511919021606445312e-01 1.294117689132690430e+00 1.637103637695312500e+03 1.430720567703247070e+00 1.300000000000000000e+01 3.000000000000000000e+00 -1.000000000000000000e+04 9.372969970703125000e+02 1.127500000000000000e+02 5.325000000000000000e+01
1.000000000000000000e+01 3.609076923076924004e+02 1.453124237060546875e+02 -7.608917236328125000e+00 5.087857842445373535e-01 1.000000000000000000e+00 1.676154052734375000e+03 9.181859493255615234e-01 1.300000000000000000e+01 1.000000000000000000e+00 -1.000000000000000000e+04 1.093984252929687500e+03 1.132500000000000000e+02 5.325000000000000000e+01
1.700000000000000000e+01 3.723076923076922640e+02 1.448880767822265625e+02 -7.215301513671875000e+00 6.007562279701232910e-01 6.470588445663452148e-01 1.715204345703125000e+03 1.334686994552612305e+00 1.300000000000000000e+01 1.000000000000000000e+00 -7.499209472656250000e+03 1.074350463867187500e+03 1.137500000000000000e+02 5.325000000000000000e+01
2.000000000000000000e+01 3.977153846153846075e+02 1.524350738525390625e+02 -6.534606933593750000e+00 6.926826834678649902e-01 1.411764740943908691e+00 1.790459228515625000e+03 1.151913762092590332e+00 1.300000000000000000e+01 3.000000000000000000e+00 -1.000000000000000000e+04 1.152804565429687500e+03 1.147500000000000000e+02 5.325000000000000000e+01
1.900000000000000000e+01 3.923692307692305121e+02 1.568748168945312500e+02 -6.283020019531250000e+00 7.544004321098327637e-01 9.411764740943908691e-01 1.825715087890625000e+03 7.908937931060791016e-01 1.300000000000000000e+01 1.000000000000000000e+00 -1.000000000000000000e+04 1.161520874023437500e+03 1.152500000000000000e+02 5.325000000000000000e+01
3.400000000000000000e+01 3.977923076923077588e+02 1.518006134033203125e+02 -6.031433105468750000e+00 5.358603000640869141e-01 1.588235259056091309e+00 1.860971069335937500e+03 9.000371694564819336e-01 1.300000000000000000e+01 3.000000000000000000e+00 -1.000000000000000000e+04 9.306885375976562500e+02 1.157500000000000000e+02 5.325000000000000000e+01
2.900000000000000000e+01 4.045615384615387597e+02 1.427149353027343750e+02 -5.779876708984375000e+00 3.183064460754394531e-01 1.411764740943908691e+00 1.896227050781250000e+03 7.369312047958374023e-01 1.300000000000000000e+01 3.000000000000000000e+00 -1.000000000000000000e+04 6.706896972656250000e+02 1.162500000000000000e+02 5.325000000000000000e+01
1.700000000000000000e+01 4.209692307692308759e+02 1.298007507324218750e+02 -5.906372070312500000e+00 6.868917346000671387e-01 5.882353186607360840e-01 1.901811279296875000e+03 7.115539908409118652e-01 1.300000000000000000e+01 1.000000000000000000e+00 -7.497729492187500000e+03 1.036635009765625000e+03 1.172500000000000000e+02 5.325000000000000000e+01
3.100000000000000000e+01 4.239076923076924572e+02 1.378178253173828125e+02 -5.969604492187500000e+00 6.496959924697875977e-01 1.000000000000000000e+00 1.904603393554687500e+03 7.106676697731018066e-01 1.300000000000000000e+01 3.000000000000000000e+00 -1.000000000000000000e+04 9.565891723632812500e+02 1.177500000000000000e+02 5.325000000000000000e+01
3.300000000000000000e+01 4.057230769230770875e+02 1.554871215820312500e+02 -6.053253173828125000e+00 3.665948808193206787e-01 1.588235259056091309e+00 1.905304931640625000e+03 7.446492910385131836e-01 1.300000000000000000e+01 3.000000000000000000e+00 -4.995921875000000000e+03 5.679808349609375000e+02 1.182500000000000000e+02 5.325000000000000000e+01
4.000000000000000000e+01 4.020692307692308987e+02 1.694505920410156250e+02 -6.198089599609375000e+00 3.909506201744079590e-01 1.352941155433654785e+00 1.899734863281250000e+03 7.619748711585998535e-01 1.300000000000000000e+01 3.000000000000000000e+00 -1.000000000000000000e+04 7.120477905273437500e+02 1.187500000000000000e+02 5.325000000000000000e+01
5.600000000000000000e+01 4.031000000000000227e+02 1.781843414306640625e+02 -6.342895507812500000e+00 4.796877205371856689e-01 1.058823585510253906e+00 1.894164794921875000e+03 7.539515495300292969e-01 1.300000000000000000e+01 4.000000000000000000e+00 -1.000000000000000000e+04 6.594732055664062500e+02 1.192500000000000000e+02 5.325000000000000000e+01
6.000000000000000000e+01 4.217307692307693969e+02 1.904877929687500000e+02 -6.487731933593750000e+00 3.986690044403076172e-01 1.588235259056091309e+00 1.888594848632812500e+03 7.414471507072448730e-01 1.300000000000000000e+01 4.000000000000000000e+00 -1.000000000000000000e+04 6.293880615234375000e+02 1.197500000000000000e+02 5.325000000000000000e+01
5.500000000000000000e+01 4.238307692307692491e+02 1.950074005126953125e+02 -6.529327392578125000e+00 4.349466264247894287e-01 1.294117689132690430e+00 1.894929687500000000e+03 7.496565580368041992e-01 1.300000000000000000e+01 4.000000000000000000e+00 -1.000000000000000000e+04 8.155257568359375000e+02 1.202500000000000000e+02 5.325000000000000000e+01
6.100000000000000000e+01 4.265461538461537998e+02 1.970550994873046875e+02 -6.467712402343750000e+00 4.149176776409149170e-01 0.000000000000000000e+00 1.913169677734375000e+03 7.601230144500732422e-01 1.300000000000000000e+01 4.000000000000000000e+00 -1.000000000000000000e+04 5.037336120605468750e+02 1.207500000000000000e+02 5.325000000000000000e+01
5.700000000000000000e+01 4.244538461538459728e+02 1.993478393554687500e+02 -6.406066894531250000e+00 5.921628475189208984e-01 6.470588445663452148e-01 1.931409545898437500e+03 7.685223817825317383e-01 1.300000000000000000e+01 4.000000000000000000e+00 -1.000000000000000000e+04 6.067133178710937500e+02 1.212500000000000000e+02 5.325000000000000000e+01
5.600000000000000000e+01 4.297692307692308304e+02 2.062517547607421875e+02 -6.344451904296875000e+00 3.800265491008758545e-01 5.882353186607360840e-01 1.949649536132812500e+03 1.033630728721618652e+00 1.300000000000000000e+01 4.000000000000000000e+00 -1.000000000000000000e+04 6.318224487304687500e+02 1.217500000000000000e+02 5.325000000000000000e+01
2.400000000000000000e+01 4.334769230769229011e+02 2.107028503417968750e+02 -6.150970458984375000e+00 5.635445117950439453e-01 2.941176593303680420e-01 1.980757446289062500e+03 1.615220785140991211e+00 6.000000000000000000e+00 3.000000000000000000e+00 1.243553924560546875e+01 6.556359863281250000e+02 1.222500000000000000e+02 5.325000000000000000e+01
2.600000000000000000e+01 4.460538461538462229e+02 2.102314910888671875e+02 -5.913513183593750000e+00 4.916017949581146240e-01 3.529411852359771729e-01 2.016154907226562500e+03 1.783566594123840332e+00 6.000000000000000000e+00 3.000000000000000000e+00 -2.486897705078125000e+03 5.184909667968750000e+02 1.227500000000000000e+02 5.325000000000000000e+01
4.600000000000000000e+01 4.620000000000001137e+02 2.032738647460937500e+02 -5.438598632812500000e+00 3.547745645046234131e-01 5.882352963089942932e-02 2.086949707031250000e+03 7.640804052352905273e-01 6.000000000000000000e+00 4.000000000000000000e+00 -7.498563476562500000e+03 3.544285278320312500e+02 1.237500000000000000e+02 5.325000000000000000e+01
4.700000000000000000e+01 4.645384615384615472e+02 2.012012176513671875e+02 -5.196990966796875000e+00 3.635782897472381592e-01 1.529411792755126953e+00 2.124139160156250000e+03 7.793511748313903809e-01 1.300000000000000000e+01 4.000000000000000000e+00 -1.000000000000000000e+04 4.251694030761718750e+02 1.242500000000000000e+02 5.325000000000000000e+01
2.400000000000000000e+01 4.601769230769231740e+02 2.034235229492187500e+02 -4.955383300781250000e+00 2.022753357887268066e-01 1.058823585510253906e+00 2.161328857421875000e+03 7.980028390884399414e-01 6.000000000000000000e+00 3.000000000000000000e+00 -1.000000000000000000e+04 3.109548339843750000e+02 1.247500000000000000e+02 5.325000000000000000e+01
3.200000000000000000e+01 4.768538461538464617e+02 2.055400848388671875e+02 -4.713775634765625000e+00 2.508135437965393066e-01 1.117647051811218262e+00 2.198518554687500000e+03 8.044720292091369629e-01 3.000000000000000000e+00 3.000000000000000000e+00 -1.000000000000000000e+04 2.925576477050781250e+02 1.252500000000000000e+02 5.325000000000000000e+01
3.800000000000000000e+01 4.865692307692310123e+02 2.038076171875000000e+02 -4.526824951171875000e+00 2.708818912506103516e-01 1.294117689132690430e+00 2.225903320312500000e+03 8.116816878318786621e-01 3.000000000000000000e+00 3.000000000000000000e+00 -4.994232421875000000e+03 3.358997802734375000e+02 1.257500000000000000e+02 5.325000000000000000e+01
3.800000000000000000e+01 4.825153846153843347e+02 2.047143096923828125e+02 -4.503875732421875000e+00 2.479201853275299072e-01 1.588235259056091309e+00 2.223873046875000000e+03 8.255555033683776855e-01 3.000000000000000000e+00 3.000000000000000000e+00 -4.991025878906250000e+03 3.589421386718750000e+02 1.262500000000000000e+02 5.325000000000000000e+01
4.500000000000000000e+01 5.338384615384613880e+02 2.241284332275390625e+02 -4.599182128906250000e+00 2.174134999513626099e-01 8.823529481887817383e-01 2.196758300781250000e+03 1.197319746017456055e+00 3.000000000000000000e+00 4.000000000000000000e+00 -4.995565429687500000e+03 2.927465209960937500e+02 1.277500000000000000e+02 5.325000000000000000e+01
2.600000000000000000e+01 5.889153846153847098e+02 2.388715515136718750e+02 -5.209869384765625000e+00 2.976035177707672119e-01 8.235294222831726074e-01 2.108601074218750000e+03 1.679786443710327148e+00 3.000000000000000000e+00 3.000000000000000000e+00 -7.498037109375000000e+03 3.490021972656250000e+02 1.287500000000000000e+02 5.325000000000000000e+01
3.700000000000000000e+01 5.813692307692306258e+02 2.441472320556640625e+02 -5.515197753906250000e+00 3.219987452030181885e-01 1.176470637321472168e+00 2.064522216796875000e+03 1.901103138923645020e+00 1.500000000000000000e+01 3.000000000000000000e+00 -4.996765625000000000e+03 3.426986083984375000e+02 1.292500000000000000e+02 5.325000000000000000e+01
2.400000000000000000e+01 5.694846153846153811e+02 2.499029693603515625e+02 -5.889739990234375000e+00 3.676334023475646973e-01 1.294117689132690430e+00 2.012391967773437500e+03 1.905595779418945312e+00 1.500000000000000000e+01 3.000000000000000000e+00 1.119152069091796875e+01 3.427897033691406250e+02 1.297500000000000000e+02 5.325000000000000000e+01
2.500000000000000000e+01 5.684461538461539476e+02 2.564139404296875000e+02 -6.287353515625000000e+00 3.127116262912750244e-01 1.588235259056091309e+00 1.957577758789062500e+03 2.045375347137451172e+00 1.500000000000000000e+01 3.000000000000000000e+00 -7.495984375000000000e+03 3.169964294433593750e+02 1.302500000000000000e+02 5.325000000000000000e+01
1.600000000000000000e+01 5.876384615384616836e+02 2.633485717773437500e+02 -6.684997558593750000e+00 3.753522932529449463e-01 8.823529481887817383e-01 1.902763671875000000e+03 2.023435592651367188e+00 1.500000000000000000e+01 1.000000000000000000e+00 -7.497037109375000000e+03 4.464873962402343750e+02 1.307500000000000000e+02 5.325000000000000000e+01
5.700000000000000000e+01 6.232230769230768601e+02 2.709783325195312500e+02 -7.082611083984375000e+00 5.700666308403015137e-01 4.117647111415863037e-01 1.847949462890625000e+03 1.562260031700134277e+00 1.300000000000000000e+01 4.000000000000000000e+00 -2.489927978515625000e+03 6.269946899414062500e+02 1.312500000000000000e+02 5.325000000000000000e+01
7.100000000000000000e+01 6.368153846153848008e+02 2.798678588867187500e+02 -7.252380371093750000e+00 7.396435737609863281e-01 9.411764740943908691e-01 1.812818725585937500e+03 1.458041906356811523e+00 1.300000000000000000e+01 4.000000000000000000e+00 -1.000000000000000000e+04 7.579578247070312500e+02 1.317500000000000000e+02 5.325000000000000000e+01
3.500000000000000000e+01 6.456538461538459615e+02 2.845155029296875000e+02 -7.422180175781250000e+00 6.924042105674743652e-01 1.058823585510253906e+00 1.777687866210937500e+03 1.069710135459899902e+00 1.300000000000000000e+01 3.000000000000000000e+00 -2.496427001953125000e+03 7.026354370117187500e+02 1.322500000000000000e+02 5.325000000000000000e+01
7.100000000000000000e+01 6.687846153846151083e+02 2.919868469238281250e+02 -7.591979980468750000e+00 7.517179846763610840e-01 6.470588445663452148e-01 1.742557128906250000e+03 7.466672062873840332e-01 1.300000000000000000e+01 4.000000000000000000e+00 -1.000000000000000000e+04 8.034996948242187500e+02 1.327500000000000000e+02 5.325000000000000000e+01
6.100000000000000000e+01 6.982461538461536747e+02 2.981987304687500000e+02 -7.682067871093750000e+00 9.069052934646606445e-01 1.000000000000000000e+00 1.714293701171875000e+03 1.513085007667541504e+00 1.300000000000000000e+01 4.000000000000000000e+00 -1.000000000000000000e+04 9.000921020507812500e+02 1.332500000000000000e+02 5.325000000000000000e+01
6.000000000000000000e+01 6.986615384615384983e+02 3.051914062500000000e+02 -7.533081054687500000e+00 8.001241683959960938e-01 7.647058963775634766e-01 1.706632568359375000e+03 1.673584938049316406e+00 1.300000000000000000e+01 4.000000000000000000e+00 -2.493487792968750000e+03 8.445347290039062500e+02 1.337500000000000000e+02 5.325000000000000000e+01
6.000000000000000000e+01 6.973615384615379753e+02 3.154646301269531250e+02 -7.384094238281250000e+00 7.325225472450256348e-01 4.117647111415863037e-01 1.698971313476562500e+03 1.562205910682678223e+00 1.300000000000000000e+01 4.000000000000000000e+00 -4.995162109375000000e+03 8.740788574218750000e+02 1.342500000000000000e+02 5.325000000000000000e+01
3.700000000000000000e+01 7.105461538461536293e+02 3.207537231445312500e+02 -7.235107421875000000e+00 9.771441221237182617e-01 0.000000000000000000e+00 1.691310058593750000e+03 1.287428736686706543e+00 1.300000000000000000e+01 3.000000000000000000e+00 -2.485264892578125000e+03 1.413371948242187500e+03 1.347500000000000000e+02 5.325000000000000000e+01
4.700000000000000000e+01 6.741846153846155403e+02 3.185787048339843750e+02 -6.339508056640625000e+00 3.538918197154998779e-01 2.941176593303680420e-01 1.759342285156250000e+03 1.837164878845214844e+00 1.300000000000000000e+01 4.000000000000000000e+00 1.881251907348632812e+01 3.658951721191406250e+02 1.357500000000000000e+02 5.325000000000000000e+01
4.000000000000000000e+01 6.438307692307694197e+02 3.143685913085937500e+02 -5.792083740234375000e+00 2.398127317428588867e-01 1.176470592617988586e-01 1.807250732421875000e+03 1.900434970855712891e+00 1.500000000000000000e+01 3.000000000000000000e+00 1.516266441345214844e+01 1.519012298583984375e+02 1.362500000000000000e+02 5.325000000000000000e+01
4.900000000000000000e+01 6.347461538461541295e+02 3.009174804687500000e+02 -5.244689941406250000e+00 3.067525923252105713e-01 2.941176593303680420e-01 1.855159301757812500e+03 1.242181181907653809e+00 1.500000000000000000e+01 4.000000000000000000e+00 -1.000000000000000000e+04 3.528190002441406250e+02 1.367500000000000000e+02 5.325000000000000000e+01
5.800000000000000000e+01 6.277999999999999545e+02 2.907991333007812500e+02 -4.834167480468750000e+00 2.429213076829910278e-01 5.882352963089942932e-02 1.844059082031250000e+03 1.123326301574707031e+00 1.300000000000000000e+01 4.000000000000000000e+00 -2.483714843750000000e+03 2.923670349121093750e+02 1.372500000000000000e+02 5.325000000000000000e+01
1.800000000000000000e+01 6.361461538461539931e+02 2.862518615722656250e+02 -4.469329833984375000e+00 1.420351415872573853e-01 0.000000000000000000e+00 1.813289306640625000e+03 1.541304230690002441e+00 1.300000000000000000e+01 1.000000000000000000e+00 -4.995884277343750000e+03 9.716471862792968750e+01 1.377500000000000000e+02 5.325000000000000000e+01
1.700000000000000000e+01 6.458307692307687375e+02 2.868280944824218750e+02 -4.104461669921875000e+00 2.396936267614364624e-01 5.882352963089942932e-02 1.782519531250000000e+03 1.422443270683288574e+00 1.300000000000000000e+01 1.000000000000000000e+00 4.783328628540039062e+01 2.509564514160156250e+02 1.382500000000000000e+02 5.325000000000000000e+01
4.900000000000000000e+01 6.878615384615384301e+02 3.528998413085937500e+02 -2.499053955078125000e+00 9.999999776482582092e-03 7.647058963775634766e-01 1.835584106445312500e+03 1.829529643058776855e+00 1.500000000000000000e+01 4.000000000000000000e+00 -1.000000000000000000e+04 1.715960502624511719e+01 1.402500000000000000e+02 5.325000000000000000e+01
5.800000000000000000e+01 6.926153846153846416e+02 3.790842285156250000e+02 -2.136138916015625000e+00 2.765249907970428467e-01 5.882352963089942932e-02 1.852463012695312500e+03 1.785960316658020020e+00 1.300000000000000000e+01 4.000000000000000000e+00 -1.000000000000000000e+04 3.256421508789062500e+02 1.407500000000000000e+02 5.325000000000000000e+01
3.400000000000000000e+01 8.583384615384616154e+02 5.055979003906250000e+02 -3.099365234375000000e-01 0.000000000000000000e+00 0.000000000000000000e+00 1.242049926757812500e+03 6.278044581413269043e-01 4.000000000000000000e+00 3.000000000000000000e+00 -1.000000000000000000e+04 1.800576477050781250e+02 1.567500000000000000e+02 5.325000000000000000e+01
3.900000000000000000e+01 8.484692307692309896e+02 5.283641357421875000e+02 -1.015441894531250000e+00 0.000000000000000000e+00 0.000000000000000000e+00 1.207162719726562500e+03 6.014288663864135742e-01 1.200000000000000000e+01 3.000000000000000000e+00 -1.000000000000000000e+04 3.335507507324218750e+02 1.572500000000000000e+02 5.325000000000000000e+01
1.500000000000000000e+01 8.574923076923078042e+02 5.463755493164062500e+02 -1.193634033203125000e+00 9.999999776482582092e-03 0.000000000000000000e+00 1.205015747070312500e+03 1.057475090026855469e+00 1.200000000000000000e+01 1.000000000000000000e+00 -1.000000000000000000e+04 5.697014770507812500e+02 1.577500000000000000e+02 5.325000000000000000e+01
2.300000000000000000e+01 9.053076923076920366e+02 5.644228515625000000e+02 -8.445434570312500000e-01 9.999999776482582092e-03 2.941176593303680420e-01 1.235609008789062500e+03 5.452625751495361328e-01 1.300000000000000000e+01 3.000000000000000000e+00 -1.000000000000000000e+04 2.070242462158203125e+02 1.582500000000000000e+02 5.325000000000000000e+01
2.900000000000000000e+01 1.006184615384615540e+03 5.732996826171875000e+02 -1.463317871093750000e-01 0.000000000000000000e+00 0.000000000000000000e+00 1.296795532226562500e+03 7.080753445625305176e-01 4.000000000000000000e+00 3.000000000000000000e+00 -1.000000000000000000e+04 4.639950942993164062e+01 1.592500000000000000e+02 5.325000000000000000e+01
1.000000000000000000e+00 3.389846153846153243e+02 1.701101684570312500e+02 6.589050292968750000e-01 0.000000000000000000e+00 1.470588207244873047e+00 2.734841796875000000e+03 3.510125160217285156e+00 4.000000000000000000e+00 1.000000000000000000e+00 -1.000000000000000000e+04 1.405817260742187500e+02 7.025000000000000000e+01 5.375000000000000000e+01
1.000000000000000000e+00 3.516846153846155403e+02 1.722496032714843750e+02 9.854125976562500000e-01 0.000000000000000000e+00 1.294117689132690430e+00 2.789588134765625000e+03 3.527598619461059570e+00 3.000000000000000000e+00 1.000000000000000000e+00 -5.006242675781250000e+03 8.192353820800781250e+01 7.275000000000000000e+01 5.375000000000000000e+01
1.000000000000000000e+00 3.529230769230770193e+02 1.765398864746093750e+02 1.057525634765625000e+00 0.000000000000000000e+00 1.823529362678527832e+00 2.804260253906250000e+03 3.532196998596191406e+00 3.000000000000000000e+00 1.000000000000000000e+00 -1.000000000000000000e+04 8.067521667480468750e+01 7.325000000000000000e+01 5.375000000000000000e+01
1.000000000000000000e+00 3.461846153846153697e+02 1.728898468017578125e+02 1.883544921875000000e-01 0.000000000000000000e+00 2.705882310867309570e+00 2.717343750000000000e+03 3.495556831359863281e+00 3.000000000000000000e+00 1.000000000000000000e+00 -1.000000000000000000e+04 1.767469940185546875e+02 7.975000000000000000e+01 5.375000000000000000e+01
9.000000000000000000e+00 3.777384615384614222e+02 1.834159545898437500e+02 1.212463378906250000e-01 0.000000000000000000e+00 2.000000000000000000e+00 2.689442871093750000e+03 3.459664583206176758e+00 4.000000000000000000e+00 1.000000000000000000e+00 -7.503460937500000000e+03 1.748299102783203125e+02 8.025000000000000000e+01 5.375000000000000000e+01
6.000000000000000000e+00 4.041692307692306940e+02 1.896317291259765625e+02 7.171630859375000000e-02 0.000000000000000000e+00 2.000000000000000000e+00 2.660840576171875000e+03 3.460983991622924805e+00 1.000000000000000000e+00 1.000000000000000000e+00 -5.011177734375000000e+03 2.250011291503906250e+02 8.075000000000000000e+01 5.375000000000000000e+01
3.000000000000000000e+01 4.448000000000000682e+02 2.071920318603515625e+02 7.836914062500000000e-02 0.000000000000000000e+00 1.764705896377563477e+00 2.599425781250000000e+03 3.495035648345947266e+00 4.000000000000000000e+00 3.000000000000000000e+00 -1.000050000000000000e+04 1.148951110839843750e+02 8.175000000000000000e+01 5.375000000000000000e+01
6.200000000000000000e+01 4.549230769230765645e+02 2.349914550781250000e+02 8.169555664062500000e-02 0.000000000000000000e+00 1.941176414489746094e+00 2.568718505859375000e+03 2.963122844696044922e+00 8.000000000000000000e+00 4.000000000000000000e+00 -7.501014648437500000e+03 1.501033630371093750e+02 8.225000000000000000e+01 5.375000000000000000e+01
5.500000000000000000e+01 4.798230769230769965e+02 2.517411499023437500e+02 6.259155273437500000e-02 0.000000000000000000e+00 1.000000000000000000e+00 2.485077148437500000e+03 2.008430957794189453e+00 8.000000000000000000e+00 4.000000000000000000e+00 -7.497875976562500000e+03 1.689862670898437500e+02 8.325000000000000000e+01 5.375000000000000000e+01
1.900000000000000000e+01 4.963153846153848008e+02 2.458756103515625000e+02 4.873657226562500000e-02 0.000000000000000000e+00 1.411764740943908691e+00 2.439551757812500000e+03 3.392181396484375000e+00 8.000000000000000000e+00 1.000000000000000000e+00 -1.000000000000000000e+04 1.827316131591796875e+02 8.375000000000000000e+01 5.375000000000000000e+01
6.000000000000000000e+00 5.167000000000001592e+02 2.458307495117187500e+02 3.488159179687500000e-02 0.000000000000000000e+00 1.470588207244873047e+00 2.394026611328125000e+03 3.491219758987426758e+00 8.000000000000000000e+00 1.000000000000000000e+00 -5.005988281250000000e+03 2.268320465087890625e+02 8.425000000000000000e+01 5.375000000000000000e+01
7.000000000000000000e+00 5.395076923076923094e+02 2.449468078613281250e+02 -7.003784179687500000e-02 0.000000000000000000e+00 7.058823704719543457e-01 2.342945068359375000e+03 3.483858108520507812e+00 8.000000000000000000e+00 1.000000000000000000e+00 -1.000000000000000000e+04 1.828464050292968750e+02 8.475000000000000000e+01 5.375000000000000000e+01
5.600000000000000000e+01 5.578230769230766555e+02 2.632556152343750000e+02 -3.406677246093750000e-01 0.000000000000000000e+00 0.000000000000000000e+00 2.237077880859375000e+03 9.017595052719116211e-01 8.000000000000000000e+00 4.000000000000000000e+00 -5.002221191406250000e+03 2.825453796386718750e+02 8.575000000000000000e+01 5.375000000000000000e+01
5.700000000000000000e+01 5.627384615384611379e+02 2.765179138183593750e+02 -4.759521484375000000e-01 0.000000000000000000e+00 0.000000000000000000e+00 2.184144287109375000e+03 8.979458212852478027e-01 1.300000000000000000e+01 4.000000000000000000e+00 -1.000000000000000000e+04 4.201304016113281250e+02 8.625000000000000000e+01 5.375000000000000000e+01
5.700000000000000000e+01 5.604461538461540613e+02 2.799811096191406250e+02 -7.131958007812500000e-01 0.000000000000000000e+00 2.941176593303680420e-01 2.131619140625000000e+03 1.099066972732543945e+00 5.000000000000000000e+00 4.000000000000000000e+00 -5.002682617187500000e+03 3.580628051757812500e+02 8.675000000000000000e+01 5.375000000000000000e+01
5.900000000000000000e+01 5.433307692307691923e+02 3.618819274902343750e+02 -1.411987304687500000e+00 0.000000000000000000e+00 0.000000000000000000e+00 1.982715942382812500e+03 8.482992053031921387e-01 1.300000000000000000e+01 4.000000000000000000e+00 -4.996174316406250000e+03 3.096816711425781250e+02 8.825000000000000000e+01 5.375000000000000000e+01
5.100000000000000000e+01 5.654538461538461434e+02 3.666555480957031250e+02 -1.597442626953125000e+00 9.999999776482582092e-03 0.000000000000000000e+00 1.964879882812500000e+03 1.321248531341552734e+00 1.300000000000000000e+01 4.000000000000000000e+00 -7.498492187500000000e+03 6.666257324218750000e+02 8.875000000000000000e+01 5.375000000000000000e+01
1.000000000000000000e+00 5.953076923076923777e+02 3.212864379882812500e+02 -1.782897949218750000e+00 7.728424668312072754e-01 0.000000000000000000e+00 1.947043701171875000e+03 1.388641238212585449e+00 1.300000000000000000e+01 1.000000000000000000e+00 -1.000000000000000000e+04 1.343281860351562500e+03 8.925000000000000000e+01 5.375000000000000000e+01
5.600000000000000000e+01 5.665076923076924231e+02 2.312838287353515625e+02 -1.968353271484375000e+00 2.148045152425765991e-01 7.647058963775634766e-01 1.929207641601562500e+03 7.447362542152404785e-01 1.300000000000000000e+01 4.000000000000000000e+00 -1.000000000000000000e+04 9.308417358398437500e+02 8.975000000000000000e+01 5.375000000000000000e+01
3.000000000000000000e+00 5.058538461538462343e+02 1.555515441894531250e+02 -2.235748291015625000e+00 0.000000000000000000e+00 1.235294103622436523e+00 1.900253295898437500e+03 3.241498708724975586e+00 4.000000000000000000e+00 1.000000000000000000e+00 -2.519855468750000000e+03 4.613574829101562500e+02 9.075000000000000000e+01 5.375000000000000000e+01
1.200000000000000000e+01 4.848384615384615586e+02 1.656700439453125000e+02 -2.352203369140625000e+00 0.000000000000000000e+00 1.352941155433654785e+00 1.886895874023437500e+03 3.370714902877807617e+00 4.000000000000000000e+00 1.000000000000000000e+00 -1.952625656127929688e+01 2.578930053710937500e+02 9.125000000000000000e+01 5.375000000000000000e+01
3.600000000000000000e+01 5.750307692307694651e+02 2.191228790283203125e+02 -2.655426025390625000e+00 0.000000000000000000e+00 2.058823585510253906e+00 1.844830078125000000e+03 3.362533330917358398e+00 8.000000000000000000e+00 3.000000000000000000e+00 -1.000000000000000000e+04 3.895154113769531250e+02 9.225000000000000000e+01 5.375000000000000000e+01
2.200000000000000000e+01 6.085000000000001137e+02 2.499649658203125000e+02 -2.865631103515625000e+00 0.000000000000000000e+00 2.058823585510253906e+00 1.811005004882812500e+03 3.335089921951293945e+00 8.000000000000000000e+00 3.000000000000000000e+00 -4.993365234375000000e+03 4.096572875976562500e+02 9.275000000000000000e+01 5.375000000000000000e+01
1.900000000000000000e+01 6.651769230769228898e+02 2.959228820800781250e+02 -3.075836181640625000e+00 1.088252589106559753e-01 1.000000000000000000e+00 1.777179809570312500e+03 9.376330375671386719e-01 1.300000000000000000e+01 1.000000000000000000e+00 -7.501095214843750000e+03 4.425614013671875000e+02 9.325000000000000000e+01 5.375000000000000000e+01
6.600000000000000000e+01 7.083538461538462343e+02 3.261126708984375000e+02 -3.286041259765625000e+00 9.999999776482582092e-03 2.352941185235977173e-01 1.743354736328125000e+03 8.214026689529418945e-01 1.300000000000000000e+01 4.000000000000000000e+00 -7.498139648437500000e+03 7.370223999023437500e+02 9.375000000000000000e+01 5.375000000000000000e+01
3.400000000000000000e+01 6.929615384615383391e+02 3.343616638183593750e+02 -3.609100341796875000e+00 2.174956202507019043e-01 0.000000000000000000e+00 1.703378662109375000e+03 7.883736491203308105e-01 1.300000000000000000e+01 3.000000000000000000e+00 -1.000000000000000000e+04 7.862336425781250000e+02 9.425000000000000000e+01 5.375000000000000000e+01
6.100000000000000000e+01 6.789846153846151537e+02 3.236940612792968750e+02 -3.932189941406250000e+00 9.999999776482582092e-03 2.941176593303680420e-01 1.663402587890625000e+03 7.462107539176940918e-01 1.300000000000000000e+01 4.000000000000000000e+00 -1.000000000000000000e+04 5.310271606445312500e+02 9.475000000000000000e+01 5.375000000000000000e+01
5.300000000000000000e+01 6.490769230769229807e+02 3.000121154785156250e+02 -4.255249023437500000e+00 1.195237487554550171e-01 0.000000000000000000e+00 1.623426513671875000e+03 1.176558256149291992e+00 1.300000000000000000e+01 4.000000000000000000e+00 -5.000421386718750000e+03 8.013911743164062500e+02 9.525000000000000000e+01 5.375000000000000000e+01
1.400000000000000000e+01 6.491384615384619110e+02 2.664064331054687500e+02 -4.596435546875000000e+00 8.580216765403747559e-01 0.000000000000000000e+00 1.583771240234375000e+03 1.834093570709228516e+00 1.300000000000000000e+01 1.000000000000000000e+00 -1.000000000000000000e+04 1.525041992187500000e+03 9.575000000000000000e+01 5.375000000000000000e+01
2.000000000000000000e+00 6.313076923076924913e+02 2.473560485839843750e+02 -4.991851806640625000e+00 4.823752641677856445e-01 0.000000000000000000e+00 1.545078369140625000e+03 1.536846160888671875e+00 1.300000000000000000e+01 1.000000000000000000e+00 -7.501632324218750000e+03 1.332421142578125000e+03 9.625000000000000000e+01 5.375000000000000000e+01
5.500000000000000000e+01 5.616615384615383846e+02 2.506104278564453125e+02 -6.058227539062500000e+00 8.348370194435119629e-01 2.352941185235977173e-01 1.444208618164062500e+03 2.053332567214965820e+00 1.300000000000000000e+01 4.000000000000000000e+00 -1.000000000000000000e+04 1.728431030273437500e+03 9.775000000000000000e+01 5.375000000000000000e+01
6.400000000000000000e+01 5.238461538461538112e+02 2.527355804443359375e+02 -6.213836669921875000e+00 7.034131288528442383e-01 9.411764740943908691e-01 1.435933227539062500e+03 1.539451837539672852e+00 1.300000000000000000e+01 4.000000000000000000e+00 -4.997260742187500000e+03 1.200379150390625000e+03 9.825000000000000000e+01 5.375000000000000000e+01
6.900000000000000000e+01 4.994538461538462570e+02 2.523128356933593750e+02 -6.369445800781250000e+00 3.124577701091766357e-01 5.882353186607360840e-01 1.427657836914062500e+03 8.285920619964599609e-01 1.300000000000000000e+01 4.000000000000000000e+00 -2.508489013671875000e+03 9.795932006835937500e+02 9.875000000000000000e+01 5.375000000000000000e+01
6.000000000000000000e+01 4.778615384615389416e+02 2.471045227050781250e+02 -6.525054931640625000e+00 5.210745930671691895e-01 0.000000000000000000e+00 1.419382446289062500e+03 8.047123551368713379e-01 1.300000000000000000e+01 4.000000000000000000e+00 -2.506650634765625000e+03 1.256443847656250000e+03 9.925000000000000000e+01 5.375000000000000000e+01
4.900000000000000000e+01 4.319769230769227875e+02 2.382303161621093750e+02 -6.321868896484375000e+00 4.425121843814849854e-01 5.882353186607360840e-01 1.461527709960937500e+03 7.368543148040771484e-01 1.300000000000000000e+01 4.000000000000000000e+00 -1.000000000000000000e+04 1.026838134765625000e+03 9.975000000000000000e+01 5.375000000000000000e+01
6.700000000000000000e+01 4.152384615384617064e+02 2.328645477294921875e+02 -5.999053955078125000e+00 2.880729138851165771e-01 0.000000000000000000e+00 1.520479858398437500e+03 7.747299075126647949e-01 5.000000000000000000e+00 4.000000000000000000e+00 -7.497704101562500000e+03 7.224898681640625000e+02 1.002500000000000000e+02 5.375000000000000000e+01
4.600000000000000000e+01 4.117076923076925254e+02 2.287114257812500000e+02 -5.676239013671875000e+00 9.999999776482582092e-03 2.941176593303680420e-01 1.579432128906250000e+03 7.975304126739501953e-01 5.000000000000000000e+00 4.000000000000000000e+00 -5.000159179687500000e+03 5.628914794921875000e+02 1.007500000000000000e+02 5.375000000000000000e+01
2.100000000000000000e+01 4.184384615384617518e+02 2.206728820800781250e+02 -5.353424072265625000e+00 9.999999776482582092e-03 5.882353186607360840e-01 1.638384277343750000e+03 8.211553692817687988e-01 5.000000000000000000e+00 3.000000000000000000e+00 -1.000000000000000000e+04 5.385350341796875000e+02 1.012500000000000000e+02 5.375000000000000000e+01
1.300000000000000000e+01 4.319230769230769056e+02 2.125913238525390625e+02 -4.814178466796875000e+00 9.999999776482582092e-03 1.000000000000000000e+00 1.720561767578125000e+03 1.373166203498840332e+00 5.000000000000000000e+00 1.000000000000000000e+00 -4.996541503906250000e+03 4.796734008789062500e+02 1.017500000000000000e+02 5.375000000000000000e+01
4.400000000000000000e+01 4.617076923076922412e+02 2.044752655029296875e+02 -4.274932861328125000e+00 9.999999776482582092e-03 1.529411792755126953e+00 1.802739257812500000e+03 1.710258126258850098e+00 5.000000000000000000e+00 3.000000000000000000e+00 -4.997839355468750000e+03 5.151445922851562500e+02 1.022500000000000000e+02 5.375000000000000000e+01
1.000000000000000000e+01 4.814538461538462002e+02 1.915326995849609375e+02 -3.735687255859375000e+00 9.999999776482582092e-03 1.117647051811218262e+00 1.884916748046875000e+03 2.691251039505004883e+00 5.000000000000000000e+00 1.000000000000000000e+00 -1.000000000000000000e+04 4.188715820312500000e+02 1.027500000000000000e+02 5.375000000000000000e+01
6.600000000000000000e+01 5.222461538461537884e+02 1.724694213867187500e+02 -2.837310791015625000e+00 1.600747704505920410e-01 6.470588445663452148e-01 2.040881713867187500e+03 7.613860964775085449e-01 1.300000000000000000e+01 4.000000000000000000e+00 -4.995706054687500000e+03 7.724036865234375000e+02 1.042500000000000000e+02 5.375000000000000000e+01
6.300000000000000000e+01 4.926615384615383277e+02 1.672946472167968750e+02 -2.617797851562500000e+00 2.991024553775787354e-01 8.823529481887817383e-01 2.082806884765625000e+03 1.002567887306213379e+00 1.300000000000000000e+01 4.000000000000000000e+00 -1.000000000000000000e+04 8.740371704101562500e+02 1.047500000000000000e+02 5.375000000000000000e+01
2.800000000000000000e+01 4.566923076923076223e+02 1.644096679687500000e+02 -2.611755371093750000e+00 3.463973402976989746e-01 1.058823585510253906e+00 2.089337890625000000e+03 1.440110921859741211e+00 1.300000000000000000e+01 3.000000000000000000e+00 -7.498687011718750000e+03 8.969523925781250000e+02 1.052500000000000000e+02 5.375000000000000000e+01
3.000000000000000000e+01 4.200923076923079407e+02 1.597687988281250000e+02 -2.819244384765625000e+00 3.175704777240753174e-01 1.117647051811218262e+00 2.060474609375000000e+03 1.524486899375915527e+00 5.000000000000000000e+00 3.000000000000000000e+00 -1.000000000000000000e+04 8.649488525390625000e+02 1.057500000000000000e+02 5.375000000000000000e+01
5.900000000000000000e+01 3.961000000000003070e+02 1.539847869873046875e+02 -3.234252929687500000e+00 3.408461213111877441e-01 1.235294103622436523e+00 2.002747802734375000e+03 7.473946809768676758e-01 1.300000000000000000e+01 4.000000000000000000e+00 -7.497384765625000000e+03 7.685894775390625000e+02 1.067500000000000000e+02 5.375000000000000000e+01
5.900000000000000000e+01 3.976230769230770079e+02 1.516729125976562500e+02 -3.923248291015625000e+00 4.769078493118286133e-01 5.882353186607360840e-01 1.934532836914062500e+03 7.363063097000122070e-01 1.300000000000000000e+01 4.000000000000000000e+00 -7.498020507812500000e+03 1.028463867187500000e+03 1.072500000000000000e+02 5.375000000000000000e+01
5.600000000000000000e+01 4.001307692307690900e+02 1.785836944580078125e+02 -7.717071533203125000e+00 8.245906233787536621e-01 6.470588445663452148e-01 1.600680786132812500e+03 1.695607304573059082e+00 1.300000000000000000e+01 4.000000000000000000e+00 -1.258699607849121094e+01 9.849223022460937500e+02 1.097500000000000000e+02 5.375000000000000000e+01
2.000000000000000000e+00 3.893769230769227079e+02 1.775178070068359375e+02 -8.339721679687500000e+00 1.764696985483169556e-01 1.823529362678527832e+00 1.555753051757812500e+03 1.593962550163269043e+00 1.300000000000000000e+01 1.000000000000000000e+00 -7.502814453125000000e+03 5.946263427734375000e+02 1.102500000000000000e+02 5.375000000000000000e+01
1.000000000000000000e+01 4.479999999999997726e+02 1.561116790771484375e+02 -8.925109863281250000e+00 9.047316908836364746e-01 1.117647051811218262e+00 1.516816406250000000e+03 1.771823644638061523e+00 1.300000000000000000e+01 1.000000000000000000e+00 -1.000000000000000000e+04 1.504110839843750000e+03 1.112500000000000000e+02 5.375000000000000000e+01
2.500000000000000000e+01 4.301076923076922753e+02 1.539935302734375000e+02 -9.019805908203125000e+00 7.688111662864685059e-01 1.470588207244873047e+00 1.512623779296875000e+03 1.547652840614318848e+00 1.300000000000000000e+01 3.000000000000000000e+00 -4.994633300781250000e+03 1.210053222656250000e+03 1.117500000000000000e+02 5.375000000000000000e+01
9.000000000000000000e+00 4.229846153846153243e+02 1.519769897460937500e+02 -9.114532470703125000e+00 7.161595821380615234e-01 1.411764740943908691e+00 1.508431152343750000e+03 1.602652072906494141e+00 1.300000000000000000e+01 1.000000000000000000e+00 -1.000000000000000000e+04 1.181908325195312500e+03 1.122500000000000000e+02 5.375000000000000000e+01
9.000000000000000000e+00 4.045538461538459956e+02 1.527149047851562500e+02 -8.975555419921875000e+00 7.728053331375122070e-01 1.117647051811218262e+00 1.522508911132812500e+03 1.648733377456665039e+00 8.000000000000000000e+00 1.000000000000000000e+00 -4.994232910156250000e+03 1.255910278320312500e+03 1.127500000000000000e+02 5.375000000000000000e+01
2.300000000000000000e+01 3.819461538461539476e+02 1.498156738281250000e+02 -8.602874755859375000e+00 5.362719297409057617e-01 1.176470637321472168e+00 1.554857055664062500e+03 1.373264312744140625e+00 1.300000000000000000e+01 3.000000000000000000e+00 -1.000000000000000000e+04 1.023330078125000000e+03 1.132500000000000000e+02 5.375000000000000000e+01
4.100000000000000000e+01 3.902153846153844938e+02 1.469451141357421875e+02 -8.230194091796875000e+00 7.647775411605834961e-01 1.117647051811218262e+00 1.587205200195312500e+03 7.634239792823791504e-01 1.300000000000000000e+01 3.000000000000000000e+00 -5.008506347656250000e+03 1.247424682617187500e+03 1.137500000000000000e+02 5.375000000000000000e+01
1.700000000000000000e+01 3.923615384615383164e+02 1.520029754638671875e+02 -7.857543945312500000e+00 3.775653839111328125e-01 1.470588207244873047e+00 1.619553466796875000e+03 8.335714340209960938e-01 1.300000000000000000e+01 1.000000000000000000e+00 -1.000000000000000000e+04 7.929450683593750000e+02 1.142500000000000000e+02 5.375000000000000000e+01
2.700000000000000000e+01 4.037461538461537884e+02 1.579967498779296875e+02 -7.571990966796875000e+00 5.864650607109069824e-01 1.529411792755126953e+00 1.651337402343750000e+03 8.433440327644348145e-01 1.300000000000000000e+01 3.000000000000000000e+00 -1.000000000000000000e+04 1.021948425292968750e+03 1.147500000000000000e+02 5.375000000000000000e+01
1.200000000000000000e+01 4.107307692307691127e+02 1.641389770507812500e+02 -7.315490722656250000e+00 7.607675790786743164e-01 5.882353186607360840e-01 1.682933227539062500e+03 1.380101203918457031e+00 1.300000000000000000e+01 1.000000000000000000e+00 -1.000000000000000000e+04 1.197132934570312500e+03 1.152500000000000000e+02 5.375000000000000000e+01
5.500000000000000000e+01 4.198153846153845166e+02 1.672739868164062500e+02 -7.058990478515625000e+00 6.940737962722778320e-01 8.823529481887817383e-01 1.714529174804687500e+03 1.388757228851318359e+00 1.300000000000000000e+01 4.000000000000000000e+00 -4.994217285156250000e+03 1.011262451171875000e+03 1.157500000000000000e+02 5.375000000000000000e+01
1.800000000000000000e+01 4.240153846153849599e+02 1.605908355712890625e+02 -6.802490234375000000e+00 7.830154299736022949e-01 1.058823585510253906e+00 1.746125000000000000e+03 8.462297320365905762e-01 1.300000000000000000e+01 1.000000000000000000e+00 -7.497125000000000000e+03 1.166115722656250000e+03 1.162500000000000000e+02 5.375000000000000000e+01
2.800000000000000000e+01 4.472769230769230262e+02 1.532489776611328125e+02 -6.819305419921875000e+00 8.273861408233642578e-01 4.117647111415863037e-01 1.760818847656250000e+03 1.082285881042480469e+00 1.300000000000000000e+01 3.000000000000000000e+00 -4.995837402343750000e+03 1.268176025390625000e+03 1.172500000000000000e+02 5.375000000000000000e+01
1.200000000000000000e+01 4.440923076923075996e+02 1.608885803222656250e+02 -6.827728271484375000e+00 8.576226234436035156e-01 2.352941185235977173e-01 1.768165649414062500e+03 1.024881839752197266e+00 1.300000000000000000e+01 1.000000000000000000e+00 -4.992565917968750000e+03 1.126044555664062500e+03 1.177500000000000000e+02 5.375000000000000000e+01
4.700000000000000000e+01 4.217923076923078725e+02 1.826684570312500000e+02 -6.925964355468750000e+00 6.030721664428710938e-01 9.411764740943908691e-01 1.776392578125000000e+03 7.427973747253417969e-01 1.300000000000000000e+01 4.000000000000000000e+00 -1.000000000000000000e+04 8.365486450195312500e+02 1.187500000000000000e+02 5.375000000000000000e+01
1.800000000000000000e+01 4.242846153846156767e+02 1.901773071289062500e+02 -6.999481201171875000e+00 4.893863797187805176e-01 5.882353186607360840e-01 1.778566040039062500e+03 1.783055663108825684e+00 1.300000000000000000e+01 1.000000000000000000e+00 -1.000000000000000000e+04 8.414293823242187500e+02 1.192500000000000000e+02 5.375000000000000000e+01
1.900000000000000000e+01 4.277461538461539021e+02 1.941353302001953125e+02 -7.069946289062500000e+00 4.151145815849304199e-01 1.411764740943908691e+00 1.793026367187500000e+03 8.818249702453613281e-01 1.300000000000000000e+01 1.000000000000000000e+00 -4.995824218750000000e+03 6.386143188476562500e+02 1.202500000000000000e+02 5.375000000000000000e+01
2.500000000000000000e+01 4.273230769230771102e+02 1.878889007568359375e+02 -6.990325927734375000e+00 5.604011416435241699e-01 8.823529481887817383e-01 1.815426635742187500e+03 7.525045275688171387e-01 1.300000000000000000e+01 3.000000000000000000e+00 -1.000000000000000000e+04 6.152903442382812500e+02 1.207500000000000000e+02 5.375000000000000000e+01
4.400000000000000000e+01 4.321384615384616268e+02 1.929852905273437500e+02 -6.910705566406250000e+00 4.067052006721496582e-01 7.058823704719543457e-01 1.837827026367187500e+03 7.603507041931152344e-01 1.300000000000000000e+01 3.000000000000000000e+00 -4.996395996093750000e+03 5.215383300781250000e+02 1.212500000000000000e+02 5.375000000000000000e+01
2.100000000000000000e+01 4.365153846153847326e+02 2.045743713378906250e+02 -6.831085205078125000e+00 3.566549122333526611e-01 9.411764740943908691e-01 1.860227416992187500e+03 1.217060446739196777e+00 1.300000000000000000e+01 3.000000000000000000e+00 -1.000000000000000000e+04 4.698013916015625000e+02 1.217500000000000000e+02 5.375000000000000000e+01
5.200000000000000000e+01 4.353076923076920934e+02 2.112215423583984375e+02 -6.656158447265625000e+00 4.655219316482543945e-01 1.117647051811218262e+00 1.889408325195312500e+03 9.382293224334716797e-01 1.300000000000000000e+01 4.000000000000000000e+00 -5.003210937500000000e+03 5.571441650390625000e+02 1.222500000000000000e+02 5.375000000000000000e+01
5.400000000000000000e+01 4.515000000000000000e+02 2.128929595947265625e+02 -6.449462890625000000e+00 3.285503983497619629e-01 7.647058963775634766e-01 1.920849609375000000e+03 7.611042857170104980e-01 1.300000000000000000e+01 4.000000000000000000e+00 -1.000000000000000000e+04 3.807449951171875000e+02 1.227500000000000000e+02 5.375000000000000000e+01
4.300000000000000000e+01 4.591461538461541636e+02 2.119299468994140625e+02 -6.242767333984375000e+00 3.543790876865386963e-01 1.000000000000000000e+00 1.952290771484375000e+03 7.547376155853271484e-01 1.300000000000000000e+01 3.000000000000000000e+00 -7.497904296875000000e+03 3.854756774902343750e+02 1.232500000000000000e+02 5.375000000000000000e+01
3.200000000000000000e+01 4.697769230769227420e+02 2.100011291503906250e+02 -6.036071777343750000e+00 3.789190649986267090e-01 1.352941155433654785e+00 1.983731933593750000e+03 7.481232285499572754e-01 1.300000000000000000e+01 3.000000000000000000e+00 -1.000000000000000000e+04 4.277468566894531250e+02 1.237500000000000000e+02 5.375000000000000000e+01
2.300000000000000000e+01 4.828846153846152447e+02 2.129730377197265625e+02 -5.850524902343750000e+00 5.355941653251647949e-01 1.352941155433654785e+00 2.014498046875000000e+03 7.547047138214111328e-01 1.300000000000000000e+01 3.000000000000000000e+00 -5.004407714843750000e+03 6.398280639648437500e+02 1.242500000000000000e+02 5.375000000000000000e+01
5.200000000000000000e+01 4.899076923076924572e+02 2.166456909179687500e+02 -5.664978027343750000e+00 3.534328043460845947e-01 8.235294222831726074e-01 2.045264282226562500e+03 8.406543731689453125e-01 1.300000000000000000e+01 4.000000000000000000e+00 -1.000000000000000000e+04 4.588500061035156250e+02 1.247500000000000000e+02 5.375000000000000000e+01
4.500000000000000000e+01 5.047153846153845507e+02 2.145669555664062500e+02 -5.479400634765625000e+00 3.741862177848815918e-01 7.647058963775634766e-01 2.076030517578125000e+03 7.793009281158447266e-01 3.000000000000000000e+00 4.000000000000000000e+00 -1.000000000000000000e+04 3.962521972656250000e+02 1.252500000000000000e+02 5.375000000000000000e+01
3.700000000000000000e+01 5.087307692307692264e+02 2.133759002685546875e+02 -5.336975097656250000e+00 3.246734142303466797e-01 6.470588445663452148e-01 2.097738281250000000e+03 7.925925850868225098e-01 1.300000000000000000e+01 3.000000000000000000e+00 -1.000000000000000000e+04 3.448074951171875000e+02 1.257500000000000000e+02 5.375000000000000000e+01
5.500000000000000000e+01 5.120230769230765873e+02 2.162589416503906250e+02 -5.323883056640625000e+00 2.195039689540863037e-01 1.058823585510253906e+00 2.092270507812500000e+03 8.064711093902587891e-01 1.300000000000000000e+01 4.000000000000000000e+00 -1.000000000000000000e+04 2.971365356445312500e+02 1.262500000000000000e+02 5.375000000000000000e+01
2.800000000000000000e+01 5.206538461538461888e+02 2.207046813964843750e+02 -5.310760498046875000e+00 2.972567677497863770e-01 1.764705896377563477e+00 2.086802978515625000e+03 8.095146417617797852e-01 1.300000000000000000e+01 3.000000000000000000e+00 -1.000000000000000000e+04 3.087251281738281250e+02 1.267500000000000000e+02 5.375000000000000000e+01
6.000000000000000000e+01 5.396384615384613426e+02 2.230446014404296875e+02 -5.445709228515625000e+00 4.442560076713562012e-01 0.000000000000000000e+00 2.058723876953125000e+03 7.958055138587951660e-01 3.000000000000000000e+00 4.000000000000000000e+00 8.516436576843261719e+00 6.805519409179687500e+02 1.277500000000000000e+02 5.375000000000000000e+01
7.400000000000000000e+01 5.615615384615387029e+02 2.199527587890625000e+02 -5.754913330078125000e+00 6.228386163711547852e-01 5.882353186607360840e-01 2.018968750000000000e+03 8.015233874320983887e-01 1.300000000000000000e+01 4.000000000000000000e+00 -7.498300292968750000e+03 6.710815429687500000e+02 1.282500000000000000e+02 5.375000000000000000e+01
3.100000000000000000e+01 5.761461538461537657e+02 2.145587158203125000e+02 -6.064147949218750000e+00 4.474319517612457275e-01 3.529411852359771729e-01 1.979213623046875000e+03 8.051139712333679199e-01 3.000000000000000000e+00 3.000000000000000000e+00 -7.497696777343750000e+03 4.189495239257812500e+02 1.287500000000000000e+02 5.375000000000000000e+01
7.100000000000000000e+01 5.772538461538462116e+02 2.196023406982421875e+02 -6.373352050781250000e+00 6.321370601654052734e-01 1.470588207244873047e+00 1.939458618164062500e+03 7.864075303077697754e-01 1.300000000000000000e+01 4.000000000000000000e+00 -2.488796630859375000e+03 5.985648803710937500e+02 1.292500000000000000e+02 5.375000000000000000e+01
7.300000000000000000e+01 5.823692307692309669e+02 2.352737731933593750e+02 -6.731781005859375000e+00 7.442041635513305664e-01 0.000000000000000000e+00 1.891898437500000000e+03 8.476126194000244141e-01 1.300000000000000000e+01 4.000000000000000000e+00 1.256305503845214844e+01 6.495366821289062500e+02 1.297500000000000000e+02 5.375000000000000000e+01
6.500000000000000000e+01 5.791769230769231172e+02 2.457336425781250000e+02 -7.106597900390625000e+00 7.007491588592529297e-01 0.000000000000000000e+00 1.841736572265625000e+03 1.587373018264770508e+00 1.500000000000000000e+01 4.000000000000000000e+00 2.120853233337402344e+01 7.980510253906250000e+02 1.302500000000000000e+02 5.375000000000000000e+01
6.500000000000000000e+01 5.856923076923078497e+02 2.537262268066406250e+02 -7.481414794921875000e+00 7.619627714157104492e-01 5.882353186607360840e-01 1.791574829101562500e+03 2.575242280960083008e+00 1.300000000000000000e+01 4.000000000000000000e+00 -2.485204345703125000e+03 7.272557983398437500e+02 1.307500000000000000e+02 5.375000000000000000e+01
7.100000000000000000e+01 6.161769230769230035e+02 2.622687683105468750e+02 -7.856231689453125000e+00 9.007159471511840820e-01 2.941176593303680420e-01 1.741412963867187500e+03 2.695037603378295898e+00 1.300000000000000000e+01 4.000000000000000000e+00 -4.994765136718750000e+03 1.064235473632812500e+03 1.312500000000000000e+02 5.375000000000000000e+01
5.400000000000000000e+01 6.268692307692305121e+02 2.705669555664062500e+02 -7.940185546875000000e+00 6.440164446830749512e-01 8.823529481887817383e-01 1.715117431640625000e+03 7.649163007736206055e-01 1.300000000000000000e+01 4.000000000000000000e+00 -4.995966796875000000e+03 6.317657470703125000e+02 1.317500000000000000e+02 5.375000000000000000e+01
5.900000000000000000e+01 6.266384615384615699e+02 2.734013671875000000e+02 -8.024139404296875000e+00 6.671721339225769043e-01 0.000000000000000000e+00 1.688822021484375000e+03 7.946730256080627441e-01 1.300000000000000000e+01 4.000000000000000000e+00 -1.000000000000000000e+04 5.513204345703125000e+02 1.322500000000000000e+02 5.375000000000000000e+01
1.600000000000000000e+01 6.411307692307693742e+02 2.748771362304687500e+02 -8.108093261718750000e+00 4.269162118434906006e-01 5.882352963089942932e-02 1.662526489257812500e+03 1.786467432975769043e+00 1.300000000000000000e+01 1.000000000000000000e+00 -2.493819580078125000e+03 2.647283020019531250e+02 1.327500000000000000e+02 5.375000000000000000e+01
4.300000000000000000e+01 6.462384615384612516e+02 2.852274780273437500e+02 -8.111968994140625000e+00 5.313253998756408691e-01 9.411764740943908691e-01 1.642949829101562500e+03 1.810721993446350098e+00 1.300000000000000000e+01 3.000000000000000000e+00 8.622591972351074219e+00 3.887312622070312500e+02 1.332500000000000000e+02 5.375000000000000000e+01
3.600000000000000000e+01 6.899461538461540613e+02 3.028975524902343750e+02 -7.875701904296875000e+00 4.943093955516815186e-01 5.882353186607360840e-01 1.643529541015625000e+03 1.726588487625122070e+00 1.300000000000000000e+01 3.000000000000000000e+00 -1.000000000000000000e+04 5.211485595703125000e+02 1.337500000000000000e+02 5.375000000000000000e+01
5.600000000000000000e+01 7.167153846153848917e+02 3.147401733398437500e+02 -7.639434814453125000e+00 9.830788969993591309e-01 1.176470592617988586e-01 1.644109375000000000e+03 1.397836565971374512e+00 1.300000000000000000e+01 4.000000000000000000e+00 -1.000000000000000000e+04 1.281145751953125000e+03 1.342500000000000000e+02 5.375000000000000000e+01
1.100000000000000000e+01 7.423769230769231626e+02 3.219095764160156250e+02 -7.403137207031250000e+00 9.991808533668518066e-01 5.294117927551269531e-01 1.644689086914062500e+03 1.142820715904235840e+00 1.300000000000000000e+01 1.000000000000000000e+00 -4.993126464843750000e+03 1.723851074218750000e+03 1.347500000000000000e+02 5.375000000000000000e+01
5.200000000000000000e+01 7.216307692307693742e+02 3.250272216796875000e+02 -6.974792480468750000e+00 7.581855058670043945e-01 0.000000000000000000e+00 1.670038452148437500e+03 1.546834588050842285e+00 1.300000000000000000e+01 4.000000000000000000e+00 -4.987168945312500000e+03 6.497443237304687500e+02 1.352500000000000000e+02 5.375000000000000000e+01
2.900000000000000000e+01 6.919153846153845961e+02 3.254125366210937500e+02 -6.354309082031250000e+00 4.758618474006652832e-01 5.294117927551269531e-01 1.720157592773437500e+03 1.796357989311218262e+00 1.500000000000000000e+01 3.000000000000000000e+00 -4.995859375000000000e+03 4.778408508300781250e+02 1.357500000000000000e+02 5.375000000000000000e+01
5.400000000000000000e+01 6.725076923076923094e+02 3.214747924804687500e+02 -5.733856201171875000e+00 3.970580101013183594e-01 5.882352963089942932e-02 1.770276611328125000e+03 1.839582324028015137e+00 1.500000000000000000e+01 4.000000000000000000e+00 -2.492911376953125000e+03 3.143486633300781250e+02 1.362500000000000000e+02 5.375000000000000000e+01
1.600000000000000000e+01 6.856461538461539931e+02 3.130011596679687500e+02 -3.388092041015625000e+00 2.026547640562057495e-01 4.705882370471954346e-01 1.616919677734375000e+03 1.743728637695312500e+00 5.000000000000000000e+00 1.000000000000000000e+00 -4.994918945312500000e+03 1.615248413085937500e+02 1.392500000000000000e+02 5.375000000000000000e+01
7.400000000000000000e+01 6.878230769230766555e+02 3.196828918457031250e+02 -2.958648681640625000e+00 2.529783844947814941e-01 4.705882370471954346e-01 1.654070434570312500e+03 1.816604256629943848e+00 1.300000000000000000e+01 4.000000000000000000e+00 -1.000000000000000000e+04 2.196560974121093750e+02 1.397500000000000000e+02 5.375000000000000000e+01
1.300000000000000000e+01 6.946538461538458478e+02 3.435714416503906250e+02 -2.529235839843750000e+00 9.999999776482582092e-03 1.764705926179885864e-01 1.691221069335937500e+03 1.267010569572448730e+00 1.500000000000000000e+01 1.000000000000000000e+00 1.244060325622558594e+01 2.725475692749023438e+01 1.402500000000000000e+02 5.375000000000000000e+01
8.000000000000000000e+00 8.271384615384608878e+02 4.622374572753906250e+02 -8.828735351562500000e-02 0.000000000000000000e+00 0.000000000000000000e+00 1.243011596679687500e+03 1.094250679016113281e+00 4.000000000000000000e+00 1.000000000000000000e+00 -1.000000000000000000e+04 9.166381835937500000e+01 1.562500000000000000e+02 5.375000000000000000e+01
1.200000000000000000e+01 8.229307692307692150e+02 5.021593322753906250e+02 -8.843994140625000000e-01 9.999999776482582092e-03 0.000000000000000000e+00 1.203013427734375000e+03 8.839115500450134277e-01 4.000000000000000000e+00 1.000000000000000000e+00 -1.000000000000000000e+04 5.485134277343750000e+02 1.567500000000000000e+02 5.375000000000000000e+01
5.000000000000000000e+00 8.538999999999997499e+02 5.299534301757812500e+02 -1.680511474609375000e+00 1.791147440671920776e-01 0.000000000000000000e+00 1.163015136718750000e+03 7.858682870864868164e-01 1.200000000000000000e+01 1.000000000000000000e+00 -1.000000000000000000e+04 1.006898620605468750e+03 1.572500000000000000e+02 5.375000000000000000e+01
2.200000000000000000e+01 8.480769230769229807e+02 5.447745361328125000e+02 -1.959350585937500000e+00 1.897220611572265625e-01 0.000000000000000000e+00 1.160536376953125000e+03 9.755621552467346191e-01 1.200000000000000000e+01 3.000000000000000000e+00 -1.000000000000000000e+04 1.078932983398437500e+03 1.577500000000000000e+02 5.375000000000000000e+01
7.000000000000000000e+00 8.663692307692307395e+02 5.543630981445312500e+02 -1.720947265625000000e+00 1.388808190822601318e-01 0.000000000000000000e+00 1.195577026367187500e+03 1.044754385948181152e+00 1.300000000000000000e+01 1.000000000000000000e+00 -1.000000000000000000e+04 9.653892211914062500e+02 1.582500000000000000e+02 5.375000000000000000e+01
2.100000000000000000e+01 9.403692307692307395e+02 5.597404174804687500e+02 -1.482574462890625000e+00 9.999999776482582092e-03 0.000000000000000000e+00 1.230617553710937500e+03 1.035532593727111816e+00 1.300000000000000000e+01 3.000000000000000000e+00 -1.000000000000000000e+04 5.911047363281250000e+02 1.587500000000000000e+02 5.375000000000000000e+01
8.000000000000000000e+00 9.494076923076924004e+02 5.603850708007812500e+02 -1.244171142578125000e+00 9.999999776482582092e-03 0.000000000000000000e+00 1.265658203125000000e+03 1.122725486755371094e+00 1.400000000000000000e+01 1.000000000000000000e+00 -1.000000000000000000e+04 4.042597351074218750e+02 1.592500000000000000e+02 5.375000000000000000e+01
0.000000000000000000e+00 3.289692307692307054e+02 1.823250732421875000e+02 5.323181152343750000e-01 0.000000000000000000e+00 1.588235259056091309e+00 2.697117431640625000e+03 3.500151395797729492e+00 4.000000000000000000e+00 1.000000000000000000e+00 -1.000000000000000000e+04 1.256059112548828125e+02 6.825000000000000000e+01 5.425000000000000000e+01
3.000000000000000000e+00 3.402307692307691696e+02 1.797913818359375000e+02 9.436340332031250000e-01 0.000000000000000000e+00 1.941176414489746094e+00 2.783805664062500000e+03 3.494539260864257812e+00 4.000000000000000000e+00 1.000000000000000000e+00 -4.994336425781250000e+03 9.701821899414062500e+01 7.525000000000000000e+01 5.425000000000000000e+01
2.000000000000000000e+00 3.359923076923075200e+02 1.716000976562500000e+02 7.944641113281250000e-01 0.000000000000000000e+00 2.058823585510253906e+00 2.769791503906250000e+03 3.495097637176513672e+00 4.000000000000000000e+00 1.000000000000000000e+00 -1.000000000000000000e+04 9.503120422363281250e+01 7.575000000000000000e+01 5.425000000000000000e+01
5.300000000000000000e+01 5.554846153846152674e+02 2.577147216796875000e+02 -1.862487792968750000e-01 0.000000000000000000e+00 7.647058963775634766e-01 2.381109130859375000e+03 1.587161302566528320e+00 5.000000000000000000e+00 4.000000000000000000e+00 -1.000000000000000000e+04 2.856045532226562500e+02 8.475000000000000000e+01 5.425000000000000000e+01
5.600000000000000000e+01 5.674153846153847098e+02 2.590493774414062500e+02 -1.514282226562500000e-01 0.000000000000000000e+00 2.352941185235977173e-01 2.352753417968750000e+03 8.842623829841613770e-01 1.300000000000000000e+01 4.000000000000000000e+00 -7.501020996093750000e+03 3.615437927246093750e+02 8.525000000000000000e+01 5.425000000000000000e+01
3.700000000000000000e+01 5.652307692307688285e+02 2.724127197265625000e+02 -1.165771484375000000e-01 0.000000000000000000e+00 3.529411852359771729e-01 2.324397460937500000e+03 1.328368902206420898e+00 1.300000000000000000e+01 3.000000000000000000e+00 -1.000000000000000000e+04 3.629120788574218750e+02 8.575000000000000000e+01 5.425000000000000000e+01
2.100000000000000000e+01 5.660461538461537430e+02 2.877182922363281250e+02 -8.172607421875000000e-02 0.000000000000000000e+00 2.647058725357055664e+00 2.296041503906250000e+03 3.051938533782958984e+00 5.000000000000000000e+00 3.000000000000000000e+00 -1.000000000000000000e+04 2.714136962890625000e+02 8.625000000000000000e+01 5.425000000000000000e+01
6.300000000000000000e+01 5.532692307692307168e+02 3.315796508789062500e+02 -3.449096679687500000e-01 0.000000000000000000e+00 4.117647111415863037e-01 2.207733642578125000e+03 1.924195766448974609e+00 5.000000000000000000e+00 4.000000000000000000e+00 -1.639973449707031250e+01 2.993221740722656250e+02 8.725000000000000000e+01 5.425000000000000000e+01
5.800000000000000000e+01 5.470615384615385892e+02 3.734845275878906250e+02 -4.765014648437500000e-01 0.000000000000000000e+00 0.000000000000000000e+00 2.163579833984375000e+03 8.614000082015991211e-01 1.300000000000000000e+01 4.000000000000000000e+00 -1.000000000000000000e+04 2.942500915527343750e+02 8.775000000000000000e+01 5.425000000000000000e+01
4.100000000000000000e+01 5.897692307692307168e+02 4.068448181152343750e+02 -6.247253417968750000e-01 1.071608662605285645e-01 0.000000000000000000e+00 2.125110351562500000e+03 1.961240887641906738e+00 1.300000000000000000e+01 3.000000000000000000e+00 -4.997115234375000000e+03 9.270230102539062500e+02 8.825000000000000000e+01 5.425000000000000000e+01
5.700000000000000000e+01 5.829692307692309896e+02 4.316400756835937500e+02 -8.227844238281250000e-01 9.999999776482582092e-03 0.000000000000000000e+00 2.103693847656250000e+03 1.855994701385498047e+00 1.300000000000000000e+01 4.000000000000000000e+00 -1.000000000000000000e+04 7.539080200195312500e+02 8.875000000000000000e+01 5.425000000000000000e+01
7.000000000000000000e+01 5.830076923076926505e+02 4.177284545898437500e+02 -1.020874023437500000e+00 1.698482632637023926e-01 0.000000000000000000e+00 2.082277099609375000e+03 7.934812307357788086e-01 1.300000000000000000e+01 4.000000000000000000e+00 -4.995314453125000000e+03 9.796055908203125000e+02 8.925000000000000000e+01 5.425000000000000000e+01
1.200000000000000000e+01 5.435615384615385892e+02 2.821476745605468750e+02 -1.218933105468750000e+00 1.485850960016250610e-01 5.882352963089942932e-02 2.060860595703125000e+03 2.938184261322021484e+00 1.300000000000000000e+01 1.000000000000000000e+00 -1.000000000000000000e+04 7.452927856445312500e+02 8.975000000000000000e+01 5.425000000000000000e+01
2.400000000000000000e+01 5.224538461538461434e+02 1.947487335205078125e+02 -1.432250976562500000e+00 9.999999776482582092e-03 1.352941155433654785e+00 2.035465332031250000e+03 3.041647195816040039e+00 1.300000000000000000e+01 3.000000000000000000e+00 -1.000000000000000000e+04 6.904574584960937500e+02 9.025000000000000000e+01 5.425000000000000000e+01
3.900000000000000000e+01 6.137384615384615927e+02 2.288829040527343750e+02 -2.643035888671875000e+00 0.000000000000000000e+00 4.117647111415863037e-01 1.871940673828125000e+03 2.069195032119750977e+00 8.000000000000000000e+00 3.000000000000000000e+00 -4.994504882812500000e+03 4.358457946777343750e+02 9.275000000000000000e+01 5.425000000000000000e+01
5.300000000000000000e+01 6.690384615384609788e+02 2.721601257324218750e+02 -2.910400390625000000e+00 9.999999776482582092e-03 0.000000000000000000e+00 1.833049560546875000e+03 8.009735345840454102e-01 1.300000000000000000e+01 4.000000000000000000e+00 -7.500804199218750000e+03 4.790243530273437500e+02 9.325000000000000000e+01 5.425000000000000000e+01
3.200000000000000000e+01 7.081538461538461888e+02 3.075030822753906250e+02 -3.177764892578125000e+00 9.999999776482582092e-03 1.176470592617988586e-01 1.794158447265625000e+03 7.680044770240783691e-01 1.300000000000000000e+01 3.000000000000000000e+00 -1.000000000000000000e+04 5.910552368164062500e+02 9.375000000000000000e+01 5.425000000000000000e+01
4.100000000000000000e+01 6.901230769230768374e+02 3.229585571289062500e+02 -3.496978759765625000e+00 1.647834628820419312e-01 0.000000000000000000e+00 1.750070678710937500e+03 7.428774237632751465e-01 1.300000000000000000e+01 3.000000000000000000e+00 -1.000000000000000000e+04 9.209174194335937500e+02 9.425000000000000000e+01 5.425000000000000000e+01
1.600000000000000000e+01 6.961538461538461888e+02 3.177811584472656250e+02 -3.816192626953125000e+00 5.718587040901184082e-01 0.000000000000000000e+00 1.705983032226562500e+03 1.628056049346923828e+00 1.300000000000000000e+01 1.000000000000000000e+00 -1.000000000000000000e+04 1.160049438476562500e+03 9.475000000000000000e+01 5.425000000000000000e+01
1.000000000000000000e+00 6.671999999999997044e+02 2.991651000976562500e+02 -4.135437011718750000e+00 6.360525488853454590e-01 0.000000000000000000e+00 1.661895263671875000e+03 1.873551845550537109e+00 1.300000000000000000e+01 1.000000000000000000e+00 -1.000000000000000000e+04 1.419309570312500000e+03 9.525000000000000000e+01 5.425000000000000000e+01
7.000000000000000000e+00 6.512461538461536747e+02 2.698139038085937500e+02 -4.434112548828125000e+00 6.154615879058837891e-01 0.000000000000000000e+00 1.622568725585937500e+03 1.250951766967773438e+00 1.300000000000000000e+01 1.000000000000000000e+00 -1.000000000000000000e+04 1.486572387695312500e+03 9.575000000000000000e+01 5.425000000000000000e+01
3.100000000000000000e+01 6.134999999999998863e+02 2.468226165771484375e+02 -4.908416748046875000e+00 6.810216307640075684e-01 0.000000000000000000e+00 1.572482543945312500e+03 1.939657449722290039e+00 1.300000000000000000e+01 3.000000000000000000e+00 -1.000000000000000000e+04 1.529102294921875000e+03 9.675000000000000000e+01 5.425000000000000000e+01
4.800000000000000000e+01 5.700230769230768146e+02 2.497826385498046875e+02 -5.145568847656250000e+00 7.149774432182312012e-01 0.000000000000000000e+00 1.547439331054687500e+03 8.521679639816284180e-01 1.300000000000000000e+01 4.000000000000000000e+00 -1.000000000000000000e+04 1.459323852539062500e+03 9.725000000000000000e+01 5.425000000000000000e+01
2.900000000000000000e+01 5.254307692307692150e+02 2.548648223876953125e+02 -5.275756835937500000e+00 3.292372524738311768e-01 5.882353186607360840e-01 1.539752075195312500e+03 6.698273420333862305e-01 1.300000000000000000e+01 3.000000000000000000e+00 -7.501710937500000000e+03 1.055000000000000000e+03 9.775000000000000000e+01 5.425000000000000000e+01
5.700000000000000000e+01 5.097461538461536747e+02 2.532446594238281250e+02 -5.299041748046875000e+00 3.972308039665222168e-01 4.117647111415863037e-01 1.549420654296875000e+03 6.779588460922241211e-01 1.300000000000000000e+01 4.000000000000000000e+00 -7.501862304687500000e+03 1.044003173828125000e+03 9.825000000000000000e+01 5.425000000000000000e+01
5.800000000000000000e+01 4.814615384615386802e+02 2.491815948486328125e+02 -5.322326660156250000e+00 2.533925175666809082e-01 2.941176593303680420e-01 1.559089111328125000e+03 7.025774717330932617e-01 1.300000000000000000e+01 4.000000000000000000e+00 -5.003717773437500000e+03 7.687080688476562500e+02 9.875000000000000000e+01 5.425000000000000000e+01
5.600000000000000000e+01 4.421384615384613994e+02 2.419156341552734375e+02 -5.345611572265625000e+00 2.322043031454086304e-01 0.000000000000000000e+00 1.568757690429687500e+03 7.502982616424560547e-01 5.000000000000000000e+00 4.000000000000000000e+00 -1.000000000000000000e+04 9.810388183593750000e+02 9.925000000000000000e+01 5.425000000000000000e+01
2.300000000000000000e+01 4.129384615384615245e+02 2.265932159423828125e+02 -4.596679687500000000e+00 9.999999776482582092e-03 2.529411792755126953e+00 1.713265747070312500e+03 1.343939781188964844e+00 5.000000000000000000e+00 3.000000000000000000e+00 -2.495892578125000000e+03 4.817406005859375000e+02 1.007500000000000000e+02 5.425000000000000000e+01
4.000000000000000000e+01 4.254384615384616382e+02 2.205352172851562500e+02 -4.322204589843750000e+00 9.999999776482582092e-03 2.235294103622436523e+00 1.764935180664062500e+03 1.797646403312683105e+00 8.000000000000000000e+00 3.000000000000000000e+00 9.721435546875000000e+00 5.212863769531250000e+02 1.012500000000000000e+02 5.425000000000000000e+01
4.000000000000000000e+00 4.386846153846154834e+02 2.123317260742187500e+02 -3.948059082031250000e+00 1.062985807657241821e-01 1.470588207244873047e+00 1.829893310546875000e+03 2.741238594055175781e+00 5.000000000000000000e+00 1.000000000000000000e+00 -1.000000000000000000e+04 5.222001953125000000e+02 1.017500000000000000e+02 5.425000000000000000e+01
5.400000000000000000e+01 4.554846153846153243e+02 2.039517059326171875e+02 -3.573913574218750000e+00 1.263462901115417480e-01 4.705882370471954346e-01 1.894851440429687500e+03 8.012379407882690430e-01 5.000000000000000000e+00 4.000000000000000000e+00 -4.997131347656250000e+03 5.184484863281250000e+02 1.022500000000000000e+02 5.425000000000000000e+01
5.000000000000000000e+01 4.834307692307694424e+02 1.906759185791015625e+02 -3.199768066406250000e+00 2.232119739055633545e-01 5.882353186607360840e-01 1.959809570312500000e+03 1.753151416778564453e+00 1.300000000000000000e+01 4.000000000000000000e+00 -4.996150390625000000e+03 6.693632202148437500e+02 1.027500000000000000e+02 5.425000000000000000e+01
4.100000000000000000e+01 4.867692307692304894e+02 1.802749633789062500e+02 -2.905212402343750000e+00 1.392260640859603882e-01 5.882353186607360840e-01 2.014811157226562500e+03 1.243082284927368164e+00 1.300000000000000000e+01 3.000000000000000000e+00 -7.497805664062500000e+03 5.543749389648437500e+02 1.032500000000000000e+02 5.425000000000000000e+01
6.000000000000000000e+01 4.970307692307694651e+02 1.775554962158203125e+02 -2.849395751953125000e+00 1.397561877965927124e-01 7.058823704719543457e-01 2.039942871093750000e+03 7.700488567352294922e-01 1.300000000000000000e+01 4.000000000000000000e+00 -4.995923339843750000e+03 5.852440795898437500e+02 1.037500000000000000e+02 5.425000000000000000e+01
6.000000000000000000e+01 5.135000000000002274e+02 1.772104492187500000e+02 -2.793579101562500000e+00 2.415090650320053101e-01 0.000000000000000000e+00 2.065074462890625000e+03 7.472640872001647949e-01 1.300000000000000000e+01 4.000000000000000000e+00 -1.000000000000000000e+04 7.516064453125000000e+02 1.042500000000000000e+02 5.425000000000000000e+01
6.500000000000000000e+01 4.765307692307691241e+02 1.773685302734375000e+02 -2.737792968750000000e+00 3.664872348308563232e-01 0.000000000000000000e+00 2.090206298828125000e+03 7.399101853370666504e-01 1.300000000000000000e+01 4.000000000000000000e+00 -1.000000000000000000e+04 7.993223266601562500e+02 1.047500000000000000e+02 5.425000000000000000e+01
7.100000000000000000e+01 4.447615384615384073e+02 1.750716247558593750e+02 -2.876312255859375000e+00 4.593592584133148193e-01 7.647058963775634766e-01 2.082389892578125000e+03 7.399028539657592773e-01 1.300000000000000000e+01 4.000000000000000000e+00 -1.000000000000000000e+04 9.085322875976562500e+02 1.052500000000000000e+02 5.425000000000000000e+01
2.500000000000000000e+01 4.259769230769230148e+02 1.711452941894531250e+02 -3.209167480468750000e+00 5.135143995285034180e-01 8.235294222831726074e-01 2.041625122070312500e+03 8.659086823463439941e-01 1.300000000000000000e+01 3.000000000000000000e+00 -1.000000000000000000e+04 9.757767333984375000e+02 1.057500000000000000e+02 5.425000000000000000e+01
2.000000000000000000e+01 4.202923076923077019e+02 1.693874053955078125e+02 -3.542022705078125000e+00 3.553134202957153320e-01 8.235294222831726074e-01 2.000860473632812500e+03 1.437224149703979492e+00 1.300000000000000000e+01 3.000000000000000000e+00 -7.497004394531250000e+03 7.819042968750000000e+02 1.062500000000000000e+02 5.425000000000000000e+01
2.300000000000000000e+01 4.092538461538460979e+02 1.663702239990234375e+02 -3.874877929687500000e+00 4.687126576900482178e-01 8.235294222831726074e-01 1.960095703125000000e+03 7.660817503929138184e-01 1.300000000000000000e+01 3.000000000000000000e+00 -1.000000000000000000e+04 8.371087646484375000e+02 1.067500000000000000e+02 5.425000000000000000e+01
1.400000000000000000e+01 3.951923076923078497e+02 1.611895904541015625e+02 -4.592987060546875000e+00 4.821557104587554932e-01 0.000000000000000000e+00 1.885506591796875000e+03 7.224051952362060547e-01 1.300000000000000000e+01 1.000000000000000000e+00 -1.000000000000000000e+04 8.643413085937500000e+02 1.072500000000000000e+02 5.425000000000000000e+01
4.800000000000000000e+01 4.021692307692308077e+02 1.583358306884765625e+02 -5.439453125000000000e+00 5.360434055328369141e-01 5.882352963089942932e-02 1.799642700195312500e+03 1.385016918182373047e+00 1.300000000000000000e+01 4.000000000000000000e+00 -7.497163085937500000e+03 9.875623168945312500e+02 1.077500000000000000e+02 5.425000000000000000e+01
4.400000000000000000e+01 3.961461538461541068e+02 1.688290100097656250e+02 -9.070007324218750000e+00 1.774955540895462036e-01 2.941176593303680420e-01 1.480779418945312500e+03 1.499407649040222168e+00 1.500000000000000000e+01 3.000000000000000000e+00 -7.494391601562500000e+03 5.025877075195312500e+02 1.102500000000000000e+02 5.425000000000000000e+01
5.300000000000000000e+01 4.031538461538457909e+02 1.505224609375000000e+02 -9.592376708984375000e+00 3.042049705982208252e-01 7.647058963775634766e-01 1.440735229492187500e+03 2.265786409378051758e+00 1.300000000000000000e+01 4.000000000000000000e+00 -7.505617675781250000e+03 6.111013793945312500e+02 1.107500000000000000e+02 5.425000000000000000e+01
6.000000000000000000e+01 4.647615384615384073e+02 1.461765594482421875e+02 -9.744415283203125000e+00 8.614850640296936035e-01 9.411764740943908691e-01 1.427694091796875000e+03 1.293250679969787598e+00 1.300000000000000000e+01 4.000000000000000000e+00 -4.994365722656250000e+03 1.498830688476562500e+03 1.112500000000000000e+02 5.425000000000000000e+01
6.000000000000000000e+00 4.632307692307694538e+02 1.511650390625000000e+02 -9.896423339843750000e+00 8.804780840873718262e-01 1.176470637321472168e+00 1.414652832031250000e+03 1.375610709190368652e+00 1.300000000000000000e+01 1.000000000000000000e+00 -1.000000000000000000e+04 1.440606689453125000e+03 1.117500000000000000e+02 5.425000000000000000e+01
1.300000000000000000e+01 4.471076923076922753e+02 1.620981445312500000e+02 -1.004843139648437500e+01 8.850022554397583008e-01 1.235294103622436523e+00 1.401611694335937500e+03 1.487569570541381836e+00 1.300000000000000000e+01 1.000000000000000000e+00 -1.000000000000000000e+04 1.335871704101562500e+03 1.122500000000000000e+02 5.425000000000000000e+01
1.600000000000000000e+01 4.476384615384619110e+02 1.677093200683593750e+02 -9.948577880859375000e+00 9.379317164421081543e-01 1.235294103622436523e+00 1.407914062500000000e+03 1.506294608116149902e+00 1.300000000000000000e+01 1.000000000000000000e+00 -1.000000000000000000e+04 1.443256469726562500e+03 1.127500000000000000e+02 5.425000000000000000e+01
1.500000000000000000e+01 4.156999999999998749e+02 1.647290496826171875e+02 -9.245117187500000000e+00 7.338420152664184570e-01 1.588235259056091309e+00 1.459206176757812500e+03 1.480080962181091309e+00 1.300000000000000000e+01 1.000000000000000000e+00 -1.000000000000000000e+04 1.153480224609375000e+03 1.137500000000000000e+02 5.425000000000000000e+01
2.700000000000000000e+01 4.166692307692305235e+02 1.666656341552734375e+02 -8.893371582031250000e+00 4.063034653663635254e-01 1.352941155433654785e+00 1.484852172851562500e+03 1.659091234207153320e+00 1.300000000000000000e+01 3.000000000000000000e+00 -7.496833007812500000e+03 8.183071289062500000e+02 1.142500000000000000e+02 5.425000000000000000e+01
3.600000000000000000e+01 4.192538461538459842e+02 1.699610748291015625e+02 -8.609375000000000000e+00 6.803312897682189941e-01 1.529411792755126953e+00 1.512215576171875000e+03 1.418481469154357910e+00 1.300000000000000000e+01 3.000000000000000000e+00 -1.000000000000000000e+04 9.770507812500000000e+02 1.147500000000000000e+02 5.425000000000000000e+01
5.300000000000000000e+01 4.320153846153843347e+02 1.726569671630859375e+02 -8.086547851562500000e+00 6.443910002708435059e-01 6.470588445663452148e-01 1.568087158203125000e+03 1.617718219757080078e+00 1.300000000000000000e+01 4.000000000000000000e+00 -2.483843261718750000e+03 1.073131835937500000e+03 1.157500000000000000e+02 5.425000000000000000e+01
2.600000000000000000e+01 4.330384615384616041e+02 1.693030700683593750e+02 -7.825103759765625000e+00 5.710755586624145508e-01 5.882352963089942932e-02 1.596022949218750000e+03 1.399048209190368652e+00 1.300000000000000000e+01 3.000000000000000000e+00 1.658701324462890625e+01 9.150210571289062500e+02 1.162500000000000000e+02 5.425000000000000000e+01
9.000000000000000000e+00 4.361692307692310351e+02 1.657889862060546875e+02 -7.778686523437500000e+00 5.180107951164245605e-01 2.352941185235977173e-01 1.607924682617187500e+03 1.762044191360473633e+00 1.300000000000000000e+01 1.000000000000000000e+00 -7.498236328125000000e+03 8.776845092773437500e+02 1.167500000000000000e+02 5.425000000000000000e+01
2.100000000000000000e+01 4.394384615384619224e+02 1.685860748291015625e+02 -7.732269287109375000e+00 4.987384974956512451e-01 0.000000000000000000e+00 1.619826293945312500e+03 1.748571753501892090e+00 1.300000000000000000e+01 3.000000000000000000e+00 -2.492508056640625000e+03 7.824617309570312500e+02 1.172500000000000000e+02 5.425000000000000000e+01
3.400000000000000000e+01 4.352692307692307168e+02 1.753821868896484375e+02 -7.685852050781250000e+00 8.666081428527832031e-01 3.529411852359771729e-01 1.631728027343750000e+03 1.719069123268127441e+00 1.300000000000000000e+01 3.000000000000000000e+00 -7.498407226562500000e+03 1.242510009765625000e+03 1.177500000000000000e+02 5.425000000000000000e+01
1.700000000000000000e+01 4.251692307692306372e+02 1.835046844482421875e+02 -7.651611328125000000e+00 5.803508162498474121e-01 5.882353186607360840e-01 1.643133422851562500e+03 1.697105288505554199e+00 1.300000000000000000e+01 1.000000000000000000e+00 -7.498291015625000000e+03 7.992683715820312500e+02 1.182500000000000000e+02 5.425000000000000000e+01
2.500000000000000000e+01 4.278153846153848576e+02 1.883294830322265625e+02 -7.653839111328125000e+00 7.804524898529052734e-01 5.882353186607360840e-01 1.653050292968750000e+03 1.689488410949707031e+00 1.300000000000000000e+01 3.000000000000000000e+00 -4.994537597656250000e+03 1.022403625488281250e+03 1.187500000000000000e+02 5.425000000000000000e+01
2.400000000000000000e+01 4.334846153846154948e+02 1.909082031250000000e+02 -7.656066894531250000e+00 7.965600490570068359e-01 5.882352963089942932e-02 1.662967163085937500e+03 1.703720927238464355e+00 1.300000000000000000e+01 3.000000000000000000e+00 -4.984312500000000000e+03 1.165538574218750000e+03 1.192500000000000000e+02 5.425000000000000000e+01
4.700000000000000000e+01 4.366769230769232308e+02 1.918100585937500000e+02 -7.658264160156250000e+00 6.570655703544616699e-01 1.352941155433654785e+00 1.672884033203125000e+03 1.736333489418029785e+00 1.300000000000000000e+01 4.000000000000000000e+00 -7.497881835937500000e+03 8.519149169921875000e+02 1.197500000000000000e+02 5.425000000000000000e+01
4.100000000000000000e+01 4.475692307692310123e+02 1.912766265869140625e+02 -7.610565185546875000e+00 7.557631731033325195e-01 7.058823704719543457e-01 1.691122924804687500e+03 1.736876010894775391e+00 1.300000000000000000e+01 3.000000000000000000e+00 -7.498452148437500000e+03 9.281945800781250000e+02 1.202500000000000000e+02 5.425000000000000000e+01
3.200000000000000000e+01 4.522846153846152788e+02 1.911944274902343750e+02 -7.512939453125000000e+00 6.996932029724121094e-01 5.882352963089942932e-02 1.717683715820312500e+03 1.652545690536499023e+00 1.300000000000000000e+01 3.000000000000000000e+00 -4.989479003906250000e+03 8.983693237304687500e+02 1.207500000000000000e+02 5.425000000000000000e+01
5.400000000000000000e+01 4.578384615384615586e+02 1.962524871826171875e+02 -7.415313720703125000e+00 6.514998078346252441e-01 1.117647051811218262e+00 1.744244506835937500e+03 7.619203925132751465e-01 1.300000000000000000e+01 4.000000000000000000e+00 -1.000000000000000000e+04 8.317196044921875000e+02 1.212500000000000000e+02 5.425000000000000000e+01
5.300000000000000000e+01 4.695615384615385324e+02 2.077426757812500000e+02 -7.317687988281250000e+00 6.919829249382019043e-01 1.235294103622436523e+00 1.770805297851562500e+03 1.634344339370727539e+00 1.300000000000000000e+01 4.000000000000000000e+00 -5.001961425781250000e+03 9.056664428710937500e+02 1.217500000000000000e+02 5.425000000000000000e+01
2.500000000000000000e+01 4.635307692307693515e+02 2.156063995361328125e+02 -7.161346435546875000e+00 7.234609723091125488e-01 2.941176593303680420e-01 1.798059204101562500e+03 1.724130868911743164e+00 1.300000000000000000e+01 3.000000000000000000e+00 -7.497714355468750000e+03 7.715158081054687500e+02 1.222500000000000000e+02 5.425000000000000000e+01
1.400000000000000000e+01 4.740153846153847326e+02 2.203868408203125000e+02 -6.985412597656250000e+00 7.089098691940307617e-01 1.176470637321472168e+00 1.825544189453125000e+03 1.185114026069641113e+00 1.300000000000000000e+01 1.000000000000000000e+00 -4.995315917968750000e+03 7.290964355468750000e+02 1.227500000000000000e+02 5.425000000000000000e+01
4.400000000000000000e+01 4.866538461538458478e+02 2.238070220947265625e+02 -6.809478759765625000e+00 5.215364098548889160e-01 8.235294222831726074e-01 1.853029174804687500e+03 1.230413079261779785e+00 1.300000000000000000e+01 3.000000000000000000e+00 -2.483231689453125000e+03 4.520416564941406250e+02 1.232500000000000000e+02 5.425000000000000000e+01
5.400000000000000000e+01 4.977230769230766327e+02 2.237979431152343750e+02 -6.633544921875000000e+00 4.187248051166534424e-01 8.235294222831726074e-01 1.880514282226562500e+03 7.170832753181457520e-01 1.300000000000000000e+01 4.000000000000000000e+00 -1.000000000000000000e+04 4.575837402343750000e+02 1.237500000000000000e+02 5.425000000000000000e+01
1.600000000000000000e+01 5.242000000000000455e+02 2.268197937011718750e+02 -6.504058837890625000e+00 5.750805735588073730e-01 1.058823585510253906e+00 1.904856933593750000e+03 7.369223237037658691e-01 1.300000000000000000e+01 1.000000000000000000e+00 -7.502011230468750000e+03 5.309793090820312500e+02 1.242500000000000000e+02 5.425000000000000000e+01
6.000000000000000000e+01 5.314230769230769056e+02 2.308248443603515625e+02 -6.374572753906250000e+00 5.631207227706909180e-01 0.000000000000000000e+00 1.929199707031250000e+03 7.657881975173950195e-01 1.300000000000000000e+01 4.000000000000000000e+00 -1.000000000000000000e+04 5.401676025390625000e+02 1.247500000000000000e+02 5.425000000000000000e+01
6.600000000000000000e+01 5.503076923076922640e+02 2.344389953613281250e+02 -6.245056152343750000e+00 6.873509287834167480e-01 0.000000000000000000e+00 1.953542480468750000e+03 1.283928513526916504e+00 1.300000000000000000e+01 4.000000000000000000e+00 -4.993611816406250000e+03 8.477586059570312500e+02 1.252500000000000000e+02 5.425000000000000000e+01
2.400000000000000000e+01 5.623153846153843460e+02 2.372021942138671875e+02 -6.147125244140625000e+00 6.408344507217407227e-01 6.470588445663452148e-01 1.969573242187500000e+03 7.206117510795593262e-01 1.300000000000000000e+01 3.000000000000000000e+00 -7.496592285156250000e+03 7.699873657226562500e+02 1.257500000000000000e+02 5.425000000000000000e+01
1.700000000000000000e+01 5.657769230769232536e+02 2.402622222900390625e+02 -6.143859863281250000e+00 7.923158407211303711e-01 0.000000000000000000e+00 1.960668090820312500e+03 7.347041368484497070e-01 1.300000000000000000e+01 1.000000000000000000e+00 -1.000000000000000000e+04 7.944542236328125000e+02 1.262500000000000000e+02 5.425000000000000000e+01
7.000000000000000000e+01 5.583538461538462343e+02 2.405803833007812500e+02 -6.140594482421875000e+00 6.517742276191711426e-01 2.941176593303680420e-01 1.951762817382812500e+03 7.597789168357849121e-01 1.300000000000000000e+01 4.000000000000000000e+00 -7.498705566406250000e+03 7.353816528320312500e+02 1.267500000000000000e+02 5.425000000000000000e+01
5.300000000000000000e+01 5.612769230769230262e+02 2.394204254150390625e+02 -6.137329101562500000e+00 7.012618184089660645e-01 1.176470637321472168e+00 1.942857666015625000e+03 7.851094007492065430e-01 1.300000000000000000e+01 4.000000000000000000e+00 -1.000000000000000000e+04 7.189746093750000000e+02 1.272500000000000000e+02 5.425000000000000000e+01
2.600000000000000000e+01 5.714307692307692150e+02 2.346572113037109375e+02 -6.918426513671875000e+00 4.640898704528808594e-01 1.588235259056091309e+00 1.849826293945312500e+03 1.953400492668151855e+00 1.500000000000000000e+01 3.000000000000000000e+00 1.315163230895996094e+01 3.692564697265625000e+02 1.287500000000000000e+02 5.425000000000000000e+01
1.500000000000000000e+01 5.634846153846153811e+02 2.348601837158203125e+02 -7.231506347656250000e+00 4.865284562110900879e-01 1.529411792755126953e+00 1.814394897460937500e+03 1.930775403976440430e+00 1.500000000000000000e+01 1.000000000000000000e+00 -2.490671630859375000e+03 3.676286926269531250e+02 1.292500000000000000e+02 5.425000000000000000e+01
2.600000000000000000e+01 5.657307692307692832e+02 2.398653259277343750e+02 -7.573791503906250000e+00 5.177737474441528320e-01 8.235294222831726074e-01 1.771404907226562500e+03 1.952291131019592285e+00 1.500000000000000000e+01 3.000000000000000000e+00 -1.000000000000000000e+04 4.028445434570312500e+02 1.297500000000000000e+02 5.425000000000000000e+01
1.900000000000000000e+01 5.419461538461538339e+02 2.439577026367187500e+02 -7.925842285156250000e+00 4.013280868530273438e-01 6.470588445663452148e-01 1.725895385742187500e+03 1.952200651168823242e+00 1.300000000000000000e+01 1.000000000000000000e+00 -1.000000000000000000e+04 4.206008911132812500e+02 1.302500000000000000e+02 5.425000000000000000e+01
1.200000000000000000e+01 5.466076923076922185e+02 2.484524841308593750e+02 -8.277862548828125000e+00 4.443351626396179199e-01 1.764705926179885864e-01 1.680385864257812500e+03 2.010362148284912109e+00 1.300000000000000000e+01 1.000000000000000000e+00 1.655646514892578125e+01 4.755787963867187500e+02 1.307500000000000000e+02 5.425000000000000000e+01
1.600000000000000000e+01 5.834307692307692150e+02 2.531073913574218750e+02 -8.629882812500000000e+00 7.252900600433349609e-01 7.058823704719543457e-01 1.634876464843750000e+03 1.901916861534118652e+00 1.300000000000000000e+01 1.000000000000000000e+00 4.129713439941406250e+01 5.376920166015625000e+02 1.312500000000000000e+02 5.425000000000000000e+01
4.200000000000000000e+01 5.982615384615382936e+02 2.594477844238281250e+02 -8.627990722656250000e+00 5.882808566093444824e-01 7.058823704719543457e-01 1.617416259765625000e+03 1.863464117050170898e+00 1.300000000000000000e+01 3.000000000000000000e+00 -4.997125000000000000e+03 4.851154174804687500e+02 1.317500000000000000e+02 5.425000000000000000e+01
6.300000000000000000e+01 6.078000000000000682e+02 2.666827697753906250e+02 -8.626098632812500000e+00 5.705319046974182129e-01 1.000000000000000000e+00 1.599956054687500000e+03 1.899991869926452637e+00 1.300000000000000000e+01 4.000000000000000000e+00 -1.000000000000000000e+04 4.592247924804687500e+02 1.322500000000000000e+02 5.425000000000000000e+01
1.400000000000000000e+01 6.020307692307686693e+02 2.758883361816406250e+02 -8.624206542968750000e+00 3.647681772708892822e-01 5.294117927551269531e-01 1.582495849609375000e+03 1.957640647888183594e+00 1.300000000000000000e+01 1.000000000000000000e+00 -2.494832763671875000e+03 2.467529602050781250e+02 1.327500000000000000e+02 5.425000000000000000e+01
1.400000000000000000e+01 6.130846153846151765e+02 2.877769470214843750e+02 -8.541870117187500000e+00 3.105036616325378418e-01 1.176470637321472168e+00 1.571605834960937500e+03 1.968554139137268066e+00 1.300000000000000000e+01 1.000000000000000000e+00 -4.997325195312500000e+03 1.207750015258789062e+02 1.332500000000000000e+02 5.425000000000000000e+01
2.200000000000000000e+01 6.363615384615384301e+02 2.997443847656250000e+02 -8.218322753906250000e+00 2.997130155563354492e-01 7.058823704719543457e-01 1.580426635742187500e+03 1.942252635955810547e+00 1.300000000000000000e+01 3.000000000000000000e+00 -2.493696044921875000e+03 1.061496582031250000e+02 1.337500000000000000e+02 5.425000000000000000e+01
6.500000000000000000e+01 6.892692307692306031e+02 3.083045043945312500e+02 -7.894744873046875000e+00 5.074243545532226562e-01 8.823529481887817383e-01 1.589247314453125000e+03 1.861854910850524902e+00 1.300000000000000000e+01 4.000000000000000000e+00 -7.498911621093750000e+03 2.225416564941406250e+02 1.342500000000000000e+02 5.425000000000000000e+01
4.600000000000000000e+01 7.135461538461538566e+02 3.262175598144531250e+02 -7.571197509765625000e+00 6.187450885772705078e-01 1.000000000000000000e+00 1.598068115234375000e+03 1.765811085700988770e+00 1.300000000000000000e+01 4.000000000000000000e+00 -7.503632324218750000e+03 7.778992309570312500e+02 1.347500000000000000e+02 5.425000000000000000e+01
5.800000000000000000e+01 7.236538461538465299e+02 3.446621093750000000e+02 -7.062652587890625000e+00 6.255528926849365234e-01 5.882353186607360840e-01 1.628643310546875000e+03 1.728947401046752930e+00 1.300000000000000000e+01 4.000000000000000000e+00 -7.495748535156250000e+03 5.998476562500000000e+02 1.352500000000000000e+02 5.425000000000000000e+01
5.400000000000000000e+01 7.060999999999997954e+02 3.463444519042968750e+02 -6.369140625000000000e+00 2.663825154304504395e-01 0.000000000000000000e+00 1.680972900390625000e+03 1.819753408432006836e+00 1.500000000000000000e+01 4.000000000000000000e+00 -2.503986083984375000e+03 1.106106643676757812e+02 1.357500000000000000e+02 5.425000000000000000e+01
4.800000000000000000e+01 6.930538461538461661e+02 3.381400756835937500e+02 -5.675659179687500000e+00 5.177687406539916992e-01 0.000000000000000000e+00 1.733302490234375000e+03 1.810083508491516113e+00 5.000000000000000000e+00 4.000000000000000000e+00 -2.493806640625000000e+03 2.230970458984375000e+02 1.362500000000000000e+02 5.425000000000000000e+01
5.000000000000000000e+00 7.872692307692311715e+02 3.719034118652343750e+02 -5.721740722656250000e-01 0.000000000000000000e+00 0.000000000000000000e+00 1.209086059570312500e+03 7.462896704673767090e-01 4.000000000000000000e+00 1.000000000000000000e+00 -7.498352539062500000e+03 1.177543029785156250e+02 1.562500000000000000e+02 5.425000000000000000e+01
2.600000000000000000e+01 8.032769230769229125e+02 4.166791076660156250e+02 -1.458862304687500000e+00 9.999999776482582092e-03 0.000000000000000000e+00 1.163976806640625000e+03 8.433791399002075195e-01 1.400000000000000000e+01 3.000000000000000000e+00 -1.000000000000000000e+04 3.724523620605468750e+02 1.567500000000000000e+02 5.425000000000000000e+01
1.400000000000000000e+01 8.275846153846155175e+02 4.589421081542968750e+02 -2.345550537109375000e+00 6.063716411590576172e-01 0.000000000000000000e+00 1.118867553710937500e+03 8.222719430923461914e-01 1.300000000000000000e+01 1.000000000000000000e+00 -1.000000000000000000e+04 9.241363525390625000e+02 1.572500000000000000e+02 5.425000000000000000e+01
4.200000000000000000e+01 8.291307692307692605e+02 4.843963317871093750e+02 -2.725067138671875000e+00 5.246183872222900391e-01 0.000000000000000000e+00 1.116057006835937500e+03 9.280250668525695801e-01 1.300000000000000000e+01 3.000000000000000000e+00 7.597997188568115234e+00 1.192018676757812500e+03 1.577500000000000000e+02 5.425000000000000000e+01
2.900000000000000000e+01 8.218538461538464617e+02 4.964281921386718750e+02 -2.597381591796875000e+00 9.999999776482582092e-03 0.000000000000000000e+00 1.155545043945312500e+03 1.258012890815734863e+00 3.000000000000000000e+00 3.000000000000000000e+00 -7.498687988281250000e+03 3.319265136718750000e+02 1.582500000000000000e+02 5.425000000000000000e+01
5.100000000000000000e+01 8.444615384615391349e+02 5.089241333007812500e+02 -2.469696044921875000e+00 1.495761573314666748e-01 0.000000000000000000e+00 1.195032958984375000e+03 1.096478343009948730e+00 1.200000000000000000e+01 4.000000000000000000e+00 -1.000000000000000000e+04 8.439140625000000000e+02 1.587500000000000000e+02 5.425000000000000000e+01
2.500000000000000000e+01 8.688153846153844597e+02 5.269595947265625000e+02 -2.342010498046875000e+00 1.225970685482025146e-01 2.941176593303680420e-01 1.234520996093750000e+03 1.124877095222473145e+00 1.200000000000000000e+01 3.000000000000000000e+00 -7.497473144531250000e+03 5.556511840820312500e+02 1.592500000000000000e+02 5.425000000000000000e+01
1.000000000000000000e+01 8.618999999999996362e+02 5.502634887695312500e+02 -1.753662109375000000e+00 9.999999776482582092e-03 5.882353186607360840e-01 1.238505126953125000e+03 1.195797324180603027e+00 1.200000000000000000e+01 1.000000000000000000e+00 -4.995826171875000000e+03 5.349567260742187500e+02 1.597500000000000000e+02 5.425000000000000000e+01
5.000000000000000000e+00 3.581307692307693742e+02 1.922540283203125000e+02 3.769531250000000000e-01 0.000000000000000000e+00 0.000000000000000000e+00 2.646679931640625000e+03 3.466105937957763672e+00 4.000000000000000000e+00 1.000000000000000000e+00 -1.000000000000000000e+04 1.304041900634765625e+02 6.875000000000000000e+01 5.475000000000000000e+01
2.200000000000000000e+01 3.628846153846153015e+02 1.862719879150390625e+02 -9.090576171875000000e-01 0.000000000000000000e+00 1.352941155433654785e+00 2.527392578125000000e+03 3.435521602630615234e+00 4.000000000000000000e+00 3.000000000000000000e+00 -1.000000000000000000e+04 1.170671310424804688e+02 7.925000000000000000e+01 5.475000000000000000e+01
1.600000000000000000e+01 4.027384615384613653e+02 2.079010314941406250e+02 -1.150054931640625000e+00 0.000000000000000000e+00 2.058823585510253906e+00 2.475966064453125000e+03 3.413708209991455078e+00 4.000000000000000000e+00 1.000000000000000000e+00 -1.000000000000000000e+04 1.401874237060546875e+02 8.025000000000000000e+01 5.475000000000000000e+01
4.500000000000000000e+01 4.665153846153844484e+02 2.259967498779296875e+02 -1.149353027343750000e+00 0.000000000000000000e+00 1.058823585510253906e+00 2.431626708984375000e+03 3.404294729232788086e+00 4.000000000000000000e+00 4.000000000000000000e+00 -1.000000000000000000e+04 1.997888183593750000e+02 8.175000000000000000e+01 5.475000000000000000e+01
1.200000000000000000e+01 5.166230769230771784e+02 2.487916259765625000e+02 -9.136352539062500000e-01 0.000000000000000000e+00 0.000000000000000000e+00 2.394866699218750000e+03 3.382949829101562500e+00 8.000000000000000000e+00 1.000000000000000000e+00 -1.000000000000000000e+04 1.639507446289062500e+02 8.325000000000000000e+01 5.475000000000000000e+01
1.800000000000000000e+01 5.387769230769231399e+02 2.541479492187500000e+02 -7.969665527343750000e-01 0.000000000000000000e+00 0.000000000000000000e+00 2.381495605468750000e+03 2.775209903717041016e+00 8.000000000000000000e+00 1.000000000000000000e+00 -2.501159423828125000e+03 2.007484436035156250e+02 8.375000000000000000e+01 5.475000000000000000e+01
4.800000000000000000e+01 5.617923076923077588e+02 2.568983154296875000e+02 -6.802978515625000000e-01 0.000000000000000000e+00 8.235294222831726074e-01 2.368124267578125000e+03 1.025733828544616699e+00 5.000000000000000000e+00 4.000000000000000000e+00 -1.000000000000000000e+04 3.771614685058593750e+02 8.425000000000000000e+01 5.475000000000000000e+01
6.200000000000000000e+01 5.761384615384613426e+02 2.609474182128906250e+02 -5.999450683593750000e-01 0.000000000000000000e+00 1.882352948188781738e+00 2.350146484375000000e+03 8.810043931007385254e-01 4.000000000000000000e+00 4.000000000000000000e+00 -1.000000000000000000e+04 2.858749389648437500e+02 8.475000000000000000e+01 5.475000000000000000e+01
6.500000000000000000e+01 5.557307692307695106e+02 3.994730834960937500e+02 -5.791931152343750000e-01 9.999999776482582092e-03 2.352941185235977173e-01 2.221552246093750000e+03 8.786861300468444824e-01 8.000000000000000000e+00 4.000000000000000000e+00 -1.000000000000000000e+04 3.745639648437500000e+02 8.725000000000000000e+01 5.475000000000000000e+01
5.600000000000000000e+01 5.603230769230768828e+02 4.354084472656250000e+02 -6.711730957031250000e-01 0.000000000000000000e+00 0.000000000000000000e+00 2.186525390625000000e+03 8.411349058151245117e-01 1.300000000000000000e+01 4.000000000000000000e+00 -1.000000000000000000e+04 3.836943664550781250e+02 8.775000000000000000e+01 5.475000000000000000e+01
5.800000000000000000e+01 5.944307692307692150e+02 4.359214477539062500e+02 -7.856140136718750000e-01 1.854570806026458740e-01 5.882352963089942932e-02 2.155003662109375000e+03 1.860142111778259277e+00 1.300000000000000000e+01 4.000000000000000000e+00 -1.000000000000000000e+04 8.135303955078125000e+02 8.825000000000000000e+01 5.475000000000000000e+01
5.100000000000000000e+01 5.981999999999999318e+02 4.120135192871093750e+02 -9.674377441406250000e-01 2.995527684688568115e-01 5.882352963089942932e-02 2.133998779296875000e+03 1.097683548927307129e+00 1.300000000000000000e+01 4.000000000000000000e+00 -1.000000000000000000e+04 1.006696166992187500e+03 8.875000000000000000e+01 5.475000000000000000e+01
3.000000000000000000e+01 5.464153846153844825e+02 3.561744079589843750e+02 -1.149230957031250000e+00 9.999999776482582092e-03 2.941176593303680420e-01 2.112993896484375000e+03 2.981897115707397461e+00 1.300000000000000000e+01 3.000000000000000000e+00 -1.000000000000000000e+04 5.112507934570312500e+02 8.925000000000000000e+01 5.475000000000000000e+01
8.000000000000000000e+00 4.807076923076922981e+02 1.983787994384765625e+02 -1.729797363281250000e+00 0.000000000000000000e+00 2.176470518112182617e+00 2.041295898437500000e+03 3.242503881454467773e+00 4.000000000000000000e+00 1.000000000000000000e+00 -1.000000000000000000e+04 4.408309631347656250e+02 9.075000000000000000e+01 5.475000000000000000e+01
4.200000000000000000e+01 5.150538461538460524e+02 1.981025543212890625e+02 -1.935028076171875000e+00 9.999999776482582092e-03 1.882352948188781738e+00 2.014502319335937500e+03 2.362846612930297852e+00 4.000000000000000000e+00 3.000000000000000000e+00 -1.000000000000000000e+04 5.646489257812500000e+02 9.125000000000000000e+01 5.475000000000000000e+01
3.200000000000000000e+01 5.613769230769228216e+02 2.099513397216796875e+02 -2.140258789062500000e+00 9.999999776482582092e-03 5.882352963089942932e-02 1.987708618164062500e+03 2.426440715789794922e+00 4.000000000000000000e+00 3.000000000000000000e+00 -7.498591308593750000e+03 5.271130371093750000e+02 9.175000000000000000e+01 5.475000000000000000e+01
5.800000000000000000e+01 5.856461538461536520e+02 2.305111846923828125e+02 -2.345977783203125000e+00 9.999999776482582092e-03 0.000000000000000000e+00 1.957102050781250000e+03 3.114247322082519531e+00 1.300000000000000000e+01 4.000000000000000000e+00 -7.498117675781250000e+03 7.171530761718750000e+02 9.225000000000000000e+01 5.475000000000000000e+01
7.100000000000000000e+01 6.025384615384614335e+02 2.602882080078125000e+02 -2.551879882812500000e+00 1.024230495095252991e-01 0.000000000000000000e+00 1.925224487304687500e+03 3.079969406127929688e+00 1.300000000000000000e+01 4.000000000000000000e+00 -2.487193847656250000e+03 7.957034301757812500e+02 9.275000000000000000e+01 5.475000000000000000e+01
6.700000000000000000e+01 6.361230769230768374e+02 2.888473205566406250e+02 -2.757781982421875000e+00 1.731524318456649780e-01 2.941176593303680420e-01 1.893346923828125000e+03 2.980594396591186523e+00 1.300000000000000000e+01 4.000000000000000000e+00 -2.490345703125000000e+03 7.571253662109375000e+02 9.325000000000000000e+01 5.475000000000000000e+01
6.900000000000000000e+01 6.882846153846151083e+02 3.059354553222656250e+02 -2.963684082031250000e+00 4.294046461582183838e-01 5.882352963089942932e-02 1.861469360351562500e+03 7.383291721343994141e-01 1.300000000000000000e+01 4.000000000000000000e+00 -7.497706054687500000e+03 1.015119445800781250e+03 9.375000000000000000e+01 5.475000000000000000e+01
6.100000000000000000e+01 6.953538461538458932e+02 3.111125793457031250e+02 -3.187927246093750000e+00 3.303373754024505615e-01 5.882352963089942932e-02 1.827378295898437500e+03 7.125222682952880859e-01 1.300000000000000000e+01 4.000000000000000000e+00 -1.000000000000000000e+04 9.220853271484375000e+02 9.425000000000000000e+01 5.475000000000000000e+01
6.200000000000000000e+01 6.761307692307690331e+02 3.024068908691406250e+02 -3.412200927734375000e+00 2.947806119918823242e-01 0.000000000000000000e+00 1.793287353515625000e+03 7.035526037216186523e-01 1.300000000000000000e+01 4.000000000000000000e+00 -1.000000000000000000e+04 9.728065795898437500e+02 9.475000000000000000e+01 5.475000000000000000e+01
6.700000000000000000e+01 6.201153846153846416e+02 2.877007751464843750e+02 -3.636444091796875000e+00 5.449379086494445801e-01 5.882352963089942932e-02 1.759196289062500000e+03 7.125415802001953125e-01 1.300000000000000000e+01 4.000000000000000000e+00 -7.498070800781250000e+03 7.803043212890625000e+02 9.525000000000000000e+01 5.475000000000000000e+01
4.600000000000000000e+01 6.096692307692308077e+02 2.729216003417968750e+02 -3.842956542968750000e+00 3.866334259510040283e-01 2.941176593303680420e-01 1.729348999023437500e+03 7.134933471679687500e-01 1.300000000000000000e+01 4.000000000000000000e+00 -1.000000000000000000e+04 1.079302856445312500e+03 9.575000000000000000e+01 5.475000000000000000e+01
5.300000000000000000e+01 5.484153846153844825e+02 2.609367980957031250e+02 -3.996276855468750000e+00 2.401581406593322754e-01 0.000000000000000000e+00 1.712232543945312500e+03 7.368924617767333984e-01 1.300000000000000000e+01 4.000000000000000000e+00 -1.000000000000000000e+04 7.408796997070312500e+02 9.625000000000000000e+01 5.475000000000000000e+01
6.200000000000000000e+01 5.387692307692306031e+02 2.516307525634765625e+02 -4.149597167968750000e+00 4.910397529602050781e-01 0.000000000000000000e+00 1.695116210937500000e+03 7.508515715599060059e-01 1.300000000000000000e+01 4.000000000000000000e+00 -7.500751464843750000e+03 9.880942993164062500e+02 9.675000000000000000e+01 5.475000000000000000e+01
4.500000000000000000e+01 5.074461538461539476e+02 2.484550476074218750e+02 -4.302947998046875000e+00 1.597657948732376099e-01 5.882352963089942932e-02 1.677999755859375000e+03 7.578133344650268555e-01 1.300000000000000000e+01 4.000000000000000000e+00 -4.989416992187500000e+03 7.211917724609375000e+02 9.725000000000000000e+01 5.475000000000000000e+01
6.700000000000000000e+01 5.144000000000000909e+02 2.475959777832031250e+02 -4.386260986328125000e+00 4.203836619853973389e-01 0.000000000000000000e+00 1.674516113281250000e+03 7.415857315063476562e-01 1.300000000000000000e+01 4.000000000000000000e+00 -5.004599121093750000e+03 1.022609069824218750e+03 9.775000000000000000e+01 5.475000000000000000e+01
6.300000000000000000e+01 5.007076923076923549e+02 2.382891998291015625e+02 -4.399597167968750000e+00 2.161439657211303711e-01 0.000000000000000000e+00 1.684665283203125000e+03 7.259880900382995605e-01 1.300000000000000000e+01 4.000000000000000000e+00 -1.000000000000000000e+04 8.825806884765625000e+02 9.825000000000000000e+01 5.475000000000000000e+01
6.100000000000000000e+01 4.803846153846152447e+02 2.283178558349609375e+02 -4.412933349609375000e+00 3.861620426177978516e-01 2.941176593303680420e-01 1.694814331054687500e+03 7.396165728569030762e-01 5.000000000000000000e+00 4.000000000000000000e+00 -1.000000000000000000e+04 9.405534667968750000e+02 9.875000000000000000e+01 5.475000000000000000e+01
1.900000000000000000e+01 4.481692307692308077e+02 2.233988494873046875e+02 -4.426269531250000000e+00 9.999999776482582092e-03 1.117647051811218262e+00 1.704963378906250000e+03 7.691797614097595215e-01 5.000000000000000000e+00 1.000000000000000000e+00 -1.000000000000000000e+04 4.418945007324218750e+02 9.925000000000000000e+01 5.475000000000000000e+01
8.000000000000000000e+00 4.442769230769230262e+02 2.240900726318359375e+02 -4.295013427734375000e+00 1.107942536473274231e-01 5.882353186607360840e-01 1.737511352539062500e+03 1.323896288871765137e+00 5.000000000000000000e+00 1.000000000000000000e+00 -1.000000000000000000e+04 5.333719482421875000e+02 9.975000000000000000e+01 5.475000000000000000e+01
4.300000000000000000e+01 4.371615384615384983e+02 2.232112884521484375e+02 -4.115570068359375000e+00 1.079564467072486877e-01 1.058823585510253906e+00 1.777525512695312500e+03 1.013787269592285156e+00 5.000000000000000000e+00 3.000000000000000000e+00 -7.501282714843750000e+03 5.485584716796875000e+02 1.002500000000000000e+02 5.475000000000000000e+01
2.700000000000000000e+01 4.277846153846152788e+02 2.210731201171875000e+02 -3.936096191406250000e+00 1.061470955610275269e-01 2.823529481887817383e+00 1.817539672851562500e+03 7.978156208992004395e-01 5.000000000000000000e+00 3.000000000000000000e+00 -7.497793457031250000e+03 5.185854492187500000e+02 1.007500000000000000e+02 5.475000000000000000e+01
5.300000000000000000e+01 4.377384615384614222e+02 2.177523956298828125e+02 -3.756652832031250000e+00 1.416555792093276978e-01 1.352941155433654785e+00 1.857553955078125000e+03 7.887945771217346191e-01 5.000000000000000000e+00 4.000000000000000000e+00 1.512912559509277344e+01 5.629074707031250000e+02 1.012500000000000000e+02 5.475000000000000000e+01
4.700000000000000000e+01 4.434076923076920593e+02 1.990433349609375000e+02 -3.335174560546875000e+00 1.368027031421661377e-01 4.117647111415863037e-01 1.949212280273437500e+03 7.865017652511596680e-01 5.000000000000000000e+00 4.000000000000000000e+00 1.724666976928710938e+01 5.169029541015625000e+02 1.022500000000000000e+02 5.475000000000000000e+01
5.200000000000000000e+01 4.607538461538458705e+02 1.867505035400390625e+02 -3.124450683593750000e+00 1.335082650184631348e-01 2.352941185235977173e-01 1.995041503906250000e+03 7.773078083992004395e-01 1.300000000000000000e+01 4.000000000000000000e+00 -1.000000000000000000e+04 5.752171630859375000e+02 1.027500000000000000e+02 5.475000000000000000e+01
5.500000000000000000e+01 4.639307692307694424e+02 1.806889343261718750e+02 -2.984985351562500000e+00 2.496290355920791626e-01 2.941176593303680420e-01 2.031805541992187500e+03 7.696670889854431152e-01 1.300000000000000000e+01 4.000000000000000000e+00 -7.498465820312500000e+03 6.459877319335937500e+02 1.032500000000000000e+02 5.475000000000000000e+01
5.100000000000000000e+01 4.678769230769231626e+02 1.815327911376953125e+02 -3.059295654296875000e+00 2.252923697233200073e-01 7.058823704719543457e-01 2.041374267578125000e+03 7.599193453788757324e-01 1.300000000000000000e+01 4.000000000000000000e+00 -7.497503906250000000e+03 5.810491943359375000e+02 1.037500000000000000e+02 5.475000000000000000e+01
4.900000000000000000e+01 4.673846153846155289e+02 1.863842468261718750e+02 -3.133636474609375000e+00 3.029178380966186523e-01 8.823529481887817383e-01 2.050942871093750000e+03 7.521271109580993652e-01 1.300000000000000000e+01 4.000000000000000000e+00 -1.000000000000000000e+04 7.187056884765625000e+02 1.042500000000000000e+02 5.475000000000000000e+01
5.800000000000000000e+01 4.462076923076924118e+02 1.912472076416015625e+02 -3.207977294921875000e+00 3.105702102184295654e-01 8.235294222831726074e-01 2.060511718750000000e+03 7.522574067115783691e-01 1.300000000000000000e+01 4.000000000000000000e+00 -7.495975585937500000e+03 7.691597290039062500e+02 1.047500000000000000e+02 5.475000000000000000e+01
1.100000000000000000e+01 4.280384615384616609e+02 1.936840820312500000e+02 -3.445892333984375000e+00 1.990250349044799805e-01 2.941176593303680420e-01 2.042535644531250000e+03 7.500910758972167969e-01 1.300000000000000000e+01 1.000000000000000000e+00 -7.498546386718750000e+03 5.009162292480468750e+02 1.052500000000000000e+02 5.475000000000000000e+01
5.300000000000000000e+01 4.164076923076922299e+02 1.923687744140625000e+02 -3.847351074218750000e+00 3.248974382877349854e-01 8.823529481887817383e-01 1.997015014648437500e+03 7.413247227668762207e-01 1.300000000000000000e+01 4.000000000000000000e+00 -1.000000000000000000e+04 6.107192382812500000e+02 1.057500000000000000e+02 5.475000000000000000e+01
7.500000000000000000e+01 4.349230769230770193e+02 1.891025695800781250e+02 -4.248809814453125000e+00 5.932051539421081543e-01 1.117647051811218262e+00 1.951494262695312500e+03 7.172849774360656738e-01 1.300000000000000000e+01 4.000000000000000000e+00 -7.498652832031250000e+03 8.562111206054687500e+02 1.062500000000000000e+02 5.475000000000000000e+01
2.900000000000000000e+01 4.178538461538461775e+02 1.845789947509765625e+02 -4.650268554687500000e+00 5.343695282936096191e-01 7.647058963775634766e-01 1.905973632812500000e+03 7.228024005889892578e-01 1.300000000000000000e+01 3.000000000000000000e+00 -4.992938476562500000e+03 8.614077758789062500e+02 1.067500000000000000e+02 5.475000000000000000e+01
2.700000000000000000e+01 3.957000000000000455e+02 1.777893371582031250e+02 -5.353515625000000000e+00 4.294908344745635986e-01 2.941176593303680420e-01 1.827049072265625000e+03 7.354195713996887207e-01 1.300000000000000000e+01 3.000000000000000000e+00 9.428264617919921875e+00 6.975919799804687500e+02 1.072500000000000000e+02 5.475000000000000000e+01
3.800000000000000000e+01 4.017076923076922412e+02 1.804292755126953125e+02 -6.157348632812500000e+00 4.923401176929473877e-01 2.941176593303680420e-01 1.736989868164062500e+03 7.260023951530456543e-01 1.300000000000000000e+01 3.000000000000000000e+00 -7.497567382812500000e+03 7.710072631835937500e+02 1.077500000000000000e+02 5.475000000000000000e+01
5.400000000000000000e+01 4.062692307692310010e+02 1.893621978759765625e+02 -6.961181640625000000e+00 6.055384278297424316e-01 0.000000000000000000e+00 1.646930664062500000e+03 7.124956250190734863e-01 1.300000000000000000e+01 4.000000000000000000e+00 -7.497246582031250000e+03 8.569869995117187500e+02 1.082500000000000000e+02 5.475000000000000000e+01
7.000000000000000000e+01 4.169615384615383391e+02 1.983194732666015625e+02 -8.949523925781250000e+00 6.678782105445861816e-01 4.705882370471954346e-01 1.451153930664062500e+03 7.022391557693481445e-01 0.000000000000000000e+00 4.000000000000000000e+00 -7.498485839843750000e+03 9.702007446289062500e+02 1.097500000000000000e+02 5.475000000000000000e+01
1.000000000000000000e+00 4.697307692307691127e+02 1.735670166015625000e+02 -9.541778564453125000e+00 8.764432072639465332e-01 0.000000000000000000e+00 1.398295166015625000e+03 1.384950280189514160e+00 1.300000000000000000e+01 1.000000000000000000e+00 -1.000000000000000000e+04 1.547505249023437500e+03 1.102500000000000000e+02 5.475000000000000000e+01
4.300000000000000000e+01 4.333307692307694765e+02 1.525471191406250000e+02 -1.001675415039062500e+01 5.990437269210815430e-01 5.882352963089942932e-02 1.356739257812500000e+03 2.382717847824096680e+00 1.300000000000000000e+01 3.000000000000000000e+00 -1.000000000000000000e+04 1.095202026367187500e+03 1.107500000000000000e+02 5.475000000000000000e+01
3.700000000000000000e+01 4.498615384615386006e+02 1.472837066650390625e+02 -1.013992309570312500e+01 5.398170351982116699e-01 1.235294103622436523e+00 1.349092041015625000e+03 1.106308937072753906e+00 1.300000000000000000e+01 3.000000000000000000e+00 3.159708023071289062e+01 6.838347167968750000e+02 1.112500000000000000e+02 5.475000000000000000e+01
9.000000000000000000e+00 4.672923076923077019e+02 1.861181335449218750e+02 -1.031021118164062500e+01 9.164412617683410645e-01 1.000000000000000000e+00 1.337401367187500000e+03 1.226100087165832520e+00 1.300000000000000000e+01 1.000000000000000000e+00 -1.000000000000000000e+04 1.402383056640625000e+03 1.127500000000000000e+02 5.475000000000000000e+01
5.000000000000000000e+00 4.458769230769232763e+02 1.874354248046875000e+02 -1.003491210937500000e+01 9.280518293380737305e-01 1.235294103622436523e+00 1.352256713867187500e+03 1.402813553810119629e+00 1.300000000000000000e+01 1.000000000000000000e+00 -2.495171630859375000e+03 1.439459350585937500e+03 1.132500000000000000e+02 5.475000000000000000e+01
9.000000000000000000e+00 4.516153846153843574e+02 1.762350463867187500e+02 -9.484283447265625000e+00 8.835241198539733887e-01 2.352941185235977173e-01 1.381967407226562500e+03 1.600131750106811523e+00 1.300000000000000000e+01 1.000000000000000000e+00 -7.498132324218750000e+03 1.226658569335937500e+03 1.142500000000000000e+02 5.475000000000000000e+01
3.100000000000000000e+01 4.386999999999999318e+02 1.777468414306640625e+02 -9.226898193359375000e+00 5.398395061492919922e-01 5.882352963089942932e-02 1.408238403320312500e+03 1.680829882621765137e+00 1.300000000000000000e+01 3.000000000000000000e+00 -1.000000000000000000e+04 9.243031005859375000e+02 1.147500000000000000e+02 5.475000000000000000e+01
5.800000000000000000e+01 4.307153846153846075e+02 1.771834716796875000e+02 -8.975524902343750000e+00 5.083195567131042480e-01 1.529411792755126953e+00 1.438314575195312500e+03 1.762320041656494141e+00 1.500000000000000000e+01 4.000000000000000000e+00 8.354508399963378906e+00 8.001213378906250000e+02 1.152500000000000000e+02 5.475000000000000000e+01
4.400000000000000000e+01 4.351384615384615699e+02 1.807775726318359375e+02 -8.724121093750000000e+00 5.913273692131042480e-01 5.882353186607360840e-01 1.468390625000000000e+03 1.766235828399658203e+00 1.300000000000000000e+01 3.000000000000000000e+00 -4.994289550781250000e+03 8.429644165039062500e+02 1.157500000000000000e+02 5.475000000000000000e+01
4.700000000000000000e+01 4.421769230769234582e+02 1.802223968505859375e+02 -8.472747802734375000e+00 6.704499721527099609e-01 0.000000000000000000e+00 1.498466796875000000e+03 1.749939918518066406e+00 1.300000000000000000e+01 4.000000000000000000e+00 -4.996976562500000000e+03 9.231994018554687500e+02 1.162500000000000000e+02 5.475000000000000000e+01
3.700000000000000000e+01 4.339230769230769056e+02 1.825636596679687500e+02 -8.430358886718750000e+00 7.003499865531921387e-01 5.294117927551269531e-01 1.505208251953125000e+03 1.757357835769653320e+00 1.300000000000000000e+01 3.000000000000000000e+00 1.124927139282226562e+01 7.720093383789062500e+02 1.167500000000000000e+02 5.475000000000000000e+01
2.600000000000000000e+01 4.172846153846154493e+02 1.863885345458984375e+02 -8.387939453125000000e+00 6.635798215866088867e-01 2.941176593303680420e-01 1.511949707031250000e+03 1.760238289833068848e+00 1.300000000000000000e+01 3.000000000000000000e+00 2.411478233337402344e+01 8.485145874023437500e+02 1.172500000000000000e+02 5.475000000000000000e+01
3.000000000000000000e+01 4.228307692307689649e+02 1.889236450195312500e+02 -8.345550537109375000e+00 7.503007650375366211e-01 2.352941185235977173e-01 1.518691162109375000e+03 1.709016203880310059e+00 3.000000000000000000e+00 3.000000000000000000e+00 -4.995146484375000000e+03 9.360156250000000000e+02 1.177500000000000000e+02 5.475000000000000000e+01
1.000000000000000000e+01 4.288846153846154721e+02 1.889484710693359375e+02 -8.303833007812500000e+00 9.226306676864624023e-01 0.000000000000000000e+00 1.527505493164062500e+03 1.657647728919982910e+00 1.300000000000000000e+01 1.000000000000000000e+00 -2.492034179687500000e+03 1.203628784179687500e+03 1.182500000000000000e+02 5.475000000000000000e+01
1.900000000000000000e+01 4.245538461538459956e+02 1.887760162353515625e+02 -8.264221191406250000e+00 6.639174222946166992e-01 8.235294222831726074e-01 1.542538208007812500e+03 1.690325021743774414e+00 1.300000000000000000e+01 1.000000000000000000e+00 -1.000000000000000000e+04 8.295638427734375000e+02 1.187500000000000000e+02 5.475000000000000000e+01
5.500000000000000000e+01 4.268846153846152447e+02 1.885395812988281250e+02 -8.224609375000000000e+00 6.070204377174377441e-01 1.294117689132690430e+00 1.557571044921875000e+03 1.726909279823303223e+00 1.300000000000000000e+01 4.000000000000000000e+00 -1.000000000000000000e+04 7.573895263671875000e+02 1.192500000000000000e+02 5.475000000000000000e+01
1.400000000000000000e+01 4.416999999999999318e+02 1.894016723632812500e+02 -8.184997558593750000e+00 6.309552192687988281e-01 6.470588445663452148e-01 1.572603881835937500e+03 1.736861705780029297e+00 1.300000000000000000e+01 1.000000000000000000e+00 -7.497311523437500000e+03 7.418739624023437500e+02 1.197500000000000000e+02 5.475000000000000000e+01
2.700000000000000000e+01 4.478692307692305690e+02 1.908755035400390625e+02 -8.111358642578125000e+00 6.687504053115844727e-01 9.411764740943908691e-01 1.594752441406250000e+03 1.754998087882995605e+00 1.300000000000000000e+01 3.000000000000000000e+00 6.628699302673339844e+00 7.321885986328125000e+02 1.202500000000000000e+02 5.475000000000000000e+01
2.200000000000000000e+01 4.538307692307692491e+02 1.938392791748046875e+02 -8.003753662109375000e+00 7.628703117370605469e-01 6.470588445663452148e-01 1.624016845703125000e+03 1.775881171226501465e+00 1.300000000000000000e+01 3.000000000000000000e+00 -7.498679687500000000e+03 8.738703613281250000e+02 1.207500000000000000e+02 5.475000000000000000e+01
1.000000000000000000e+01 4.536615384615384414e+02 1.988255920410156250e+02 -7.896148681640625000e+00 5.709803700447082520e-01 8.235294222831726074e-01 1.653281250000000000e+03 1.770324230194091797e+00 1.300000000000000000e+01 1.000000000000000000e+00 -4.997787109375000000e+03 6.221772460937500000e+02 1.212500000000000000e+02 5.475000000000000000e+01
4.000000000000000000e+01 4.783076923076922640e+02 2.075244750976562500e+02 -7.788513183593750000e+00 7.135125398635864258e-01 5.882353186607360840e-01 1.682545654296875000e+03 1.713865995407104492e+00 1.300000000000000000e+01 3.000000000000000000e+00 -4.998185058593750000e+03 7.937146606445312500e+02 1.217500000000000000e+02 5.475000000000000000e+01
1.100000000000000000e+01 4.974153846153845393e+02 2.196721801757812500e+02 -7.677612304687500000e+00 7.520003914833068848e-01 2.941176593303680420e-01 1.704113159179687500e+03 1.672111749649047852e+00 1.300000000000000000e+01 1.000000000000000000e+00 -7.498012695312500000e+03 7.463918457031250000e+02 1.222500000000000000e+02 5.475000000000000000e+01
3.900000000000000000e+01 5.041230769230768374e+02 2.316490631103515625e+02 -7.565643310546875000e+00 9.302278757095336914e-01 2.352941185235977173e-01 1.723115112304687500e+03 1.683709740638732910e+00 1.300000000000000000e+01 3.000000000000000000e+00 -7.495540039062500000e+03 1.121905517578125000e+03 1.227500000000000000e+02 5.475000000000000000e+01
1.900000000000000000e+01 5.207846153846154493e+02 2.426443176269531250e+02 -7.453643798828125000e+00 7.773922681808471680e-01 1.176470637321472168e+00 1.742117065429687500e+03 1.670907258987426758e+00 1.300000000000000000e+01 1.000000000000000000e+00 -2.489342529296875000e+03 8.889353027343750000e+02 1.232500000000000000e+02 5.475000000000000000e+01
2.800000000000000000e+01 5.440384615384615472e+02 2.529747924804687500e+02 -7.341644287109375000e+00 7.518723011016845703e-01 5.882353186607360840e-01 1.761119140625000000e+03 1.656794905662536621e+00 1.300000000000000000e+01 3.000000000000000000e+00 -1.000000000000000000e+04 7.479874877929687500e+02 1.237500000000000000e+02 5.475000000000000000e+01
3.100000000000000000e+01 5.549615384615383391e+02 2.578637084960937500e+02 -7.263702392578125000e+00 6.858519911766052246e-01 5.882353186607360840e-01 1.781729980468750000e+03 1.684159755706787109e+00 1.300000000000000000e+01 3.000000000000000000e+00 -7.498663574218750000e+03 6.655300903320312500e+02 1.242500000000000000e+02 5.475000000000000000e+01
4.400000000000000000e+01 5.728153846153844597e+02 2.604067993164062500e+02 -7.185760498046875000e+00 7.515766620635986328e-01 1.176470592617988586e-01 1.802340942382812500e+03 1.714667201042175293e+00 1.300000000000000000e+01 3.000000000000000000e+00 -1.000000000000000000e+04 6.961180419921875000e+02 1.247500000000000000e+02 5.475000000000000000e+01
2.200000000000000000e+01 5.759615384615384528e+02 2.641454772949218750e+02 -7.107788085937500000e+00 6.063402295112609863e-01 5.882353186607360840e-01 1.822951904296875000e+03 1.765850663185119629e+00 1.300000000000000000e+01 3.000000000000000000e+00 -7.498185058593750000e+03 5.534816894531250000e+02 1.252500000000000000e+02 5.475000000000000000e+01
4.100000000000000000e+01 5.770846153846151765e+02 2.678108520507812500e+02 -7.062591552734375000e+00 4.550909101963043213e-01 2.941176593303680420e-01 1.835984863281250000e+03 9.055154323577880859e-01 1.300000000000000000e+01 3.000000000000000000e+00 -4.995839843750000000e+03 5.419731445312500000e+02 1.257500000000000000e+02 5.475000000000000000e+01
5.900000000000000000e+01 5.913000000000002956e+02 2.691081542968750000e+02 -7.115661621093750000e+00 6.359099149703979492e-01 8.823529481887817383e-01 1.826283447265625000e+03 7.499118447303771973e-01 1.300000000000000000e+01 4.000000000000000000e+00 -1.000000000000000000e+04 5.864526977539062500e+02 1.262500000000000000e+02 5.475000000000000000e+01
2.000000000000000000e+01 5.712923076923078725e+02 2.681063232421875000e+02 -7.168731689453125000e+00 4.495883285999298096e-01 1.176470637321472168e+00 1.816582031250000000e+03 1.552704930305480957e+00 1.300000000000000000e+01 3.000000000000000000e+00 -1.000000000000000000e+04 4.875957031250000000e+02 1.267500000000000000e+02 5.475000000000000000e+01
2.400000000000000000e+01 5.783615384615384301e+02 2.654083251953125000e+02 -7.221801757812500000e+00 4.945490062236785889e-01 2.941176593303680420e-01 1.806880615234375000e+03 1.940523505210876465e+00 1.500000000000000000e+01 3.000000000000000000e+00 1.889811706542968750e+01 4.351009216308593750e+02 1.272500000000000000e+02 5.475000000000000000e+01
5.200000000000000000e+01 5.669076923076921730e+02 2.611209716796875000e+02 -7.735778808593750000e+00 4.584348797798156738e-01 5.882353186607360840e-01 1.751386108398437500e+03 1.947832584381103516e+00 1.500000000000000000e+01 4.000000000000000000e+00 -1.000000000000000000e+04 4.020931701660156250e+02 1.282500000000000000e+02 5.475000000000000000e+01
3.300000000000000000e+01 5.627846153846155630e+02 2.654774475097656250e+02 -8.060729980468750000e+00 4.716512858867645264e-01 7.647058963775634766e-01 1.717623535156250000e+03 1.943649291992187500e+00 1.500000000000000000e+01 3.000000000000000000e+00 -2.476133056640625000e+03 3.785296020507812500e+02 1.287500000000000000e+02 5.475000000000000000e+01
4.500000000000000000e+01 5.549923076923079179e+02 2.632159729003906250e+02 -8.385681152343750000e+00 5.103548765182495117e-01 9.411764740943908691e-01 1.683860961914062500e+03 1.923951864242553711e+00 1.500000000000000000e+01 4.000000000000000000e+00 -1.000000000000000000e+04 3.984169006347656250e+02 1.292500000000000000e+02 5.475000000000000000e+01
1.200000000000000000e+01 5.479538461538461434e+02 2.550810241699218750e+02 -8.674468994140625000e+00 5.761213898658752441e-01 5.882352963089942932e-02 1.649889892578125000e+03 1.924910545349121094e+00 1.300000000000000000e+01 1.000000000000000000e+00 1.216214752197265625e+01 4.271815490722656250e+02 1.297500000000000000e+02 5.475000000000000000e+01
1.800000000000000000e+01 5.385230769230771557e+02 2.520223236083984375e+02 -8.951263427734375000e+00 4.860916137695312500e-01 7.647058963775634766e-01 1.615849243164062500e+03 1.961798787117004395e+00 1.300000000000000000e+01 1.000000000000000000e+00 -4.996030761718750000e+03 4.893742065429687500e+02 1.302500000000000000e+02 5.475000000000000000e+01
5.100000000000000000e+01 5.371692307692308077e+02 2.507902526855468750e+02 -9.228027343750000000e+00 6.052786707878112793e-01 0.000000000000000000e+00 1.581808593750000000e+03 1.890219449996948242e+00 1.300000000000000000e+01 4.000000000000000000e+00 -2.487821533203125000e+03 6.061153564453125000e+02 1.307500000000000000e+02 5.475000000000000000e+01
3.300000000000000000e+01 5.726230769230771784e+02 2.515746307373046875e+02 -9.504791259765625000e+00 9.298927187919616699e-01 6.470588445663452148e-01 1.547767944335937500e+03 1.731460809707641602e+00 1.300000000000000000e+01 3.000000000000000000e+00 1.755155181884765625e+01 9.059886474609375000e+02 1.312500000000000000e+02 5.475000000000000000e+01
4.100000000000000000e+01 5.941923076923076223e+02 2.542462921142578125e+02 -9.426727294921875000e+00 9.676683545112609863e-01 0.000000000000000000e+00 1.536703735351562500e+03 1.668061256408691406e+00 1.300000000000000000e+01 3.000000000000000000e+00 1.709761428833007812e+01 1.312638671875000000e+03 1.317500000000000000e+02 5.475000000000000000e+01
5.200000000000000000e+01 5.924538461538461434e+02 2.552391815185546875e+02 -9.348693847656250000e+00 8.711662888526916504e-01 0.000000000000000000e+00 1.525639526367187500e+03 1.720646262168884277e+00 1.300000000000000000e+01 4.000000000000000000e+00 -7.497636718750000000e+03 7.308775024414062500e+02 1.322500000000000000e+02 5.475000000000000000e+01
1.600000000000000000e+01 5.952230769230772012e+02 2.616474304199218750e+02 -9.270629882812500000e+00 9.723178148269653320e-01 8.823529481887817383e-01 1.514575317382812500e+03 1.736025571823120117e+00 1.300000000000000000e+01 1.000000000000000000e+00 1.269449329376220703e+01 1.038999877929687500e+03 1.327500000000000000e+02 5.475000000000000000e+01
3.000000000000000000e+01 6.508384615384615017e+02 3.031204833984375000e+02 -8.381805419921875000e+00 6.337881684303283691e-01 5.882352963089942932e-02 1.536004272460937500e+03 1.334656715393066406e+00 1.500000000000000000e+01 3.000000000000000000e+00 -4.994785156250000000e+03 2.812953186035156250e+02 1.342500000000000000e+02 5.475000000000000000e+01
4.700000000000000000e+01 6.855461538461537430e+02 3.285281066894531250e+02 -8.012817382812500000e+00 3.764590620994567871e-01 5.294117927551269531e-01 1.549216308593750000e+03 1.383797764778137207e+00 1.500000000000000000e+01 4.000000000000000000e+00 1.275429534912109375e+01 1.714818115234375000e+02 1.347500000000000000e+02 5.475000000000000000e+01
6.000000000000000000e+00 7.408692307692307395e+02 3.077434082031250000e+02 -7.390441894531250000e-01 9.999999776482582092e-03 0.000000000000000000e+00 1.209048339843750000e+03 6.224452853202819824e-01 1.500000000000000000e+01 1.000000000000000000e+00 -1.000000000000000000e+04 1.993634643554687500e+02 1.562500000000000000e+02 5.475000000000000000e+01
3.600000000000000000e+01 7.588923076923075541e+02 3.071630249023437500e+02 -1.599548339843750000e+00 9.999999776482582092e-03 0.000000000000000000e+00 1.177097778320312500e+03 7.112608551979064941e-01 4.000000000000000000e+00 3.000000000000000000e+00 -1.000000000000000000e+04 2.733255615234375000e+02 1.567500000000000000e+02 5.475000000000000000e+01
7.000000000000000000e+00 7.916846153846147445e+02 3.162855834960937500e+02 -2.460052490234375000e+00 7.885179519653320312e-01 0.000000000000000000e+00 1.145147216796875000e+03 8.476241230964660645e-01 1.300000000000000000e+01 1.000000000000000000e+00 -1.000000000000000000e+04 1.019593505859375000e+03 1.572500000000000000e+02 5.475000000000000000e+01
1.200000000000000000e+01 7.900384615384614335e+02 3.488866271972656250e+02 -2.876525878906250000e+00 5.706924200057983398e-01 0.000000000000000000e+00 1.142391601562500000e+03 9.290420413017272949e-01 1.300000000000000000e+01 1.000000000000000000e+00 -7.497615234375000000e+03 6.517117309570312500e+02 1.577500000000000000e+02 5.475000000000000000e+01
4.000000000000000000e+01 7.826384615384613426e+02 3.869792785644531250e+02 -2.849029541015625000e+00 1.435917466878890991e-01 0.000000000000000000e+00 1.168830932617187500e+03 1.355926513671875000e+00 1.200000000000000000e+01 3.000000000000000000e+00 -1.000000000000000000e+04 2.834588317871093750e+02 1.582500000000000000e+02 5.475000000000000000e+01
1.600000000000000000e+01 7.716923076923075087e+02 4.074731140136718750e+02 -2.821533203125000000e+00 0.000000000000000000e+00 0.000000000000000000e+00 1.195270263671875000e+03 1.481189727783203125e+00 3.000000000000000000e+00 1.000000000000000000e+00 -1.000000000000000000e+04 1.519071960449218750e+02 1.587500000000000000e+02 5.475000000000000000e+01
4.800000000000000000e+01 7.957846153846153356e+02 4.283371276855468750e+02 -2.794036865234375000e+00 9.999999776482582092e-03 0.000000000000000000e+00 1.221709716796875000e+03 1.309212327003479004e+00 3.000000000000000000e+00 4.000000000000000000e+00 -1.000000000000000000e+04 4.819039001464843750e+02 1.592500000000000000e+02 5.475000000000000000e+01
1.000000000000000000e+00 8.045769230769226397e+02 4.793644714355468750e+02 -2.319030761718750000e+00 3.662206828594207764e-01 0.000000000000000000e+00 1.226405883789062500e+03 1.101957082748413086e+00 1.200000000000000000e+01 1.000000000000000000e+00 -7.497917480468750000e+03 8.456921386718750000e+02 1.597500000000000000e+02 5.475000000000000000e+01
3.300000000000000000e+01 7.781307692307690331e+02 5.592743530273437500e+02 -1.070648193359375000e+00 9.999999776482582092e-03 0.000000000000000000e+00 1.221302734375000000e+03 9.801474213600158691e-01 4.000000000000000000e+00 3.000000000000000000e+00 -1.000000000000000000e+04 3.638990478515625000e+02 1.607500000000000000e+02 5.475000000000000000e+01
1.800000000000000000e+01 7.647230769230770875e+02 5.484653320312500000e+02 -4.464721679687500000e-01 0.000000000000000000e+00 0.000000000000000000e+00 1.218751220703125000e+03 1.026465177536010742e+00 1.200000000000000000e+01 1.000000000000000000e+00 -7.497402832031250000e+03 2.352401580810546875e+02 1.612500000000000000e+02 5.475000000000000000e+01
1.900000000000000000e+01 3.982230769230769170e+02 1.995543212890625000e+02 2.588500976562500000e-01 0.000000000000000000e+00 8.823529481887817383e-01 2.603761474609375000e+03 3.421206712722778320e+00 4.000000000000000000e+00 1.000000000000000000e+00 -1.000000000000000000e+04 1.387337799072265625e+02 6.975000000000000000e+01 5.525000000000000000e+01
1.200000000000000000e+01 4.183307692307691923e+02 1.909493713378906250e+02 4.136962890625000000e-01 0.000000000000000000e+00 1.294117689132690430e+00 2.628911376953125000e+03 3.397234439849853516e+00 4.000000000000000000e+00 1.000000000000000000e+00 -1.000000000000000000e+04 1.219163970947265625e+02 7.175000000000000000e+01 5.525000000000000000e+01
1.600000000000000000e+01 3.664538461538461434e+02 1.980057067871093750e+02 -2.054138183593750000e-01 0.000000000000000000e+00 1.470588207244873047e+00 2.565231201171875000e+03 1.868571639060974121e+00 4.000000000000000000e+00 1.000000000000000000e+00 -1.000000000000000000e+04 1.075861282348632812e+02 7.675000000000000000e+01 5.525000000000000000e+01
1.100000000000000000e+01 3.567000000000002160e+02 2.038582763671875000e+02 -9.591064453125000000e-01 0.000000000000000000e+00 1.529411792755126953e+00 2.482093017578125000e+03 1.783695936203002930e+00 4.000000000000000000e+00 1.000000000000000000e+00 -1.000000000000000000e+04 1.157806625366210938e+02 7.825000000000000000e+01 5.525000000000000000e+01
1.200000000000000000e+01 4.294000000000003183e+02 2.188058319091796875e+02 -1.713989257812500000e+00 0.000000000000000000e+00 4.705882370471954346e-01 2.367356201171875000e+03 3.366385936737060547e+00 4.000000000000000000e+00 1.000000000000000000e+00 -1.000000000000000000e+04 1.432848358154296875e+02 8.075000000000000000e+01 5.525000000000000000e+01
1.000000000000000000e+01 4.503153846153846303e+02 2.225868835449218750e+02 -1.681488037109375000e+00 0.000000000000000000e+00 2.941176593303680420e-01 2.360197265625000000e+03 3.365837335586547852e+00 4.000000000000000000e+00 1.000000000000000000e+00 -1.000000000000000000e+04 1.409032135009765625e+02 8.125000000000000000e+01 5.525000000000000000e+01
2.500000000000000000e+01 4.997307692307692264e+02 2.508911895751953125e+02 -1.534088134765625000e+00 0.000000000000000000e+00 2.823529481887817383e+00 2.339716552734375000e+03 2.145980358123779297e+00 8.000000000000000000e+00 3.000000000000000000e+00 -1.000000000000000000e+04 8.981345367431640625e+01 8.275000000000000000e+01 5.525000000000000000e+01
1.300000000000000000e+01 6.003307692307693060e+02 2.635631103515625000e+02 -1.035766601562500000e+00 0.000000000000000000e+00 3.529411852359771729e-01 2.314044677734375000e+03 3.349720001220703125e+00 4.000000000000000000e+00 1.000000000000000000e+00 -1.000000000000000000e+04 1.773518829345703125e+02 8.475000000000000000e+01 5.525000000000000000e+01
6.300000000000000000e+01 5.754230769230770193e+02 3.642131958007812500e+02 -8.186035156250000000e-01 0.000000000000000000e+00 0.000000000000000000e+00 2.252678466796875000e+03 8.736639618873596191e-01 1.300000000000000000e+01 4.000000000000000000e+00 -1.000000000000000000e+04 2.025885772705078125e+02 8.675000000000000000e+01 5.525000000000000000e+01
5.500000000000000000e+01 5.585000000000002274e+02 4.246993408203125000e+02 -8.759155273437500000e-01 0.000000000000000000e+00 3.529411852359771729e-01 2.226834716796875000e+03 8.550930619239807129e-01 1.300000000000000000e+01 4.000000000000000000e+00 -1.000000000000000000e+04 3.978848266601562500e+02 8.725000000000000000e+01 5.525000000000000000e+01
3.500000000000000000e+01 5.525846153846155175e+02 4.465951843261718750e+02 -9.331970214843750000e-01 2.430140674114227295e-01 6.470588445663452148e-01 2.200990722656250000e+03 8.342323899269104004e-01 1.300000000000000000e+01 3.000000000000000000e+00 -7.498201171875000000e+03 7.162058105468750000e+02 8.775000000000000000e+01 5.525000000000000000e+01
5.700000000000000000e+01 5.309692307692308759e+02 3.976034851074218750e+02 -1.017028808593750000e+00 9.999999776482582092e-03 2.941176593303680420e-01 2.176533691406250000e+03 8.187488913536071777e-01 1.300000000000000000e+01 4.000000000000000000e+00 -1.000000000000000000e+04 6.821422729492187500e+02 8.825000000000000000e+01 5.525000000000000000e+01
5.100000000000000000e+01 5.375384615384615472e+02 3.309241333007812500e+02 -1.180419921875000000e+00 9.999999776482582092e-03 5.882352963089942932e-02 2.156237060546875000e+03 8.066483139991760254e-01 1.300000000000000000e+01 4.000000000000000000e+00 -1.000000000000000000e+04 6.962243652343750000e+02 8.875000000000000000e+01 5.525000000000000000e+01
1.300000000000000000e+01 5.138769230769233900e+02 2.390938110351562500e+02 -2.190246582031250000e+00 9.999999776482582092e-03 1.823529362678527832e+00 2.025587768554687500e+03 3.214272737503051758e+00 4.000000000000000000e+00 1.000000000000000000e+00 -4.994764160156250000e+03 3.633360290527343750e+02 9.175000000000000000e+01 5.525000000000000000e+01
3.800000000000000000e+01 5.920307692307691241e+02 2.887408447265625000e+02 -2.470520019531250000e+00 0.000000000000000000e+00 0.000000000000000000e+00 1.977939453125000000e+03 7.965527772903442383e-01 1.300000000000000000e+01 3.000000000000000000e+00 -1.000000000000000000e+04 5.125756225585937500e+02 9.275000000000000000e+01 5.525000000000000000e+01
5.300000000000000000e+01 6.137923076923077588e+02 3.117202758789062500e+02 -2.741729736328125000e+00 9.999999776482582092e-03 0.000000000000000000e+00 1.930007446289062500e+03 1.736736536026000977e+00 1.300000000000000000e+01 4.000000000000000000e+00 -1.000000000000000000e+04 5.553901977539062500e+02 9.375000000000000000e+01 5.525000000000000000e+01
2.000000000000000000e+01 6.079153846153847098e+02 3.021140136718750000e+02 -2.864257812500000000e+00 9.999999776482582092e-03 8.235294222831726074e-01 1.906962036132812500e+03 2.161201000213623047e+00 1.300000000000000000e+01 3.000000000000000000e+00 -1.000000000000000000e+04 5.475344238281250000e+02 9.425000000000000000e+01 5.525000000000000000e+01
3.800000000000000000e+01 5.630076923076920821e+02 2.851102600097656250e+02 -2.986755371093750000e+00 9.999999776482582092e-03 1.000000000000000000e+00 1.883916625976562500e+03 2.447996616363525391e+00 8.000000000000000000e+00 3.000000000000000000e+00 -7.498290527343750000e+03 4.705701293945312500e+02 9.475000000000000000e+01 5.525000000000000000e+01
5.800000000000000000e+01 5.330692307692307850e+02 2.772726440429687500e+02 -3.109252929687500000e+00 9.999999776482582092e-03 6.470588445663452148e-01 1.860871215820312500e+03 1.027800559997558594e+00 1.300000000000000000e+01 4.000000000000000000e+00 -7.498896484375000000e+03 4.028318786621093750e+02 9.525000000000000000e+01 5.525000000000000000e+01
4.600000000000000000e+01 5.096846153846154834e+02 2.682340087890625000e+02 -3.219909667968750000e+00 0.000000000000000000e+00 2.941176593303680420e-01 1.841183349609375000e+03 8.198513984680175781e-01 8.000000000000000000e+00 4.000000000000000000e+00 -1.000000000000000000e+04 3.198832092285156250e+02 9.575000000000000000e+01 5.525000000000000000e+01
6.500000000000000000e+01 5.043615384615385437e+02 2.539939117431640625e+02 -3.294952392578125000e+00 9.999999776482582092e-03 0.000000000000000000e+00 1.831568115234375000e+03 8.140677213668823242e-01 1.300000000000000000e+01 4.000000000000000000e+00 2.741800117492675781e+01 4.246616821289062500e+02 9.625000000000000000e+01 5.525000000000000000e+01
6.700000000000000000e+01 5.007923076923076451e+02 2.424299163818359375e+02 -3.369995117187500000e+00 1.201918721199035645e-01 0.000000000000000000e+00 1.821953002929687500e+03 8.020305633544921875e-01 1.300000000000000000e+01 4.000000000000000000e+00 -1.000000000000000000e+04 5.289256591796875000e+02 9.675000000000000000e+01 5.525000000000000000e+01
6.200000000000000000e+01 5.106615384615382141e+02 2.399183807373046875e+02 -3.445037841796875000e+00 1.178851053118705750e-01 0.000000000000000000e+00 1.812337890625000000e+03 7.894007563591003418e-01 1.300000000000000000e+01 4.000000000000000000e+00 4.539368438720703125e+01 5.939177856445312500e+02 9.725000000000000000e+01 5.525000000000000000e+01
7.200000000000000000e+01 5.074153846153844256e+02 2.378579864501953125e+02 -3.488800048828125000e+00 1.440278291702270508e-01 1.764705926179885864e-01 1.812195922851562500e+03 7.772569060325622559e-01 1.300000000000000000e+01 4.000000000000000000e+00 2.706775093078613281e+01 6.219918212890625000e+02 9.775000000000000000e+01 5.525000000000000000e+01
3.500000000000000000e+01 4.942461538461538453e+02 2.339471588134765625e+02 -3.501281738281250000e+00 1.138772219419479370e-01 2.941176593303680420e-01 1.821527343750000000e+03 7.776660919189453125e-01 1.300000000000000000e+01 3.000000000000000000e+00 -1.000000000000000000e+04 5.152138061523437500e+02 9.825000000000000000e+01 5.525000000000000000e+01
3.300000000000000000e+01 4.601000000000000796e+02 2.262280578613281250e+02 -3.513763427734375000e+00 9.999999776482582092e-03 1.235294103622436523e+00 1.830858764648437500e+03 7.962080240249633789e-01 5.000000000000000000e+00 3.000000000000000000e+00 -2.492572509765625000e+03 3.577516174316406250e+02 9.875000000000000000e+01 5.525000000000000000e+01
3.200000000000000000e+01 4.492461538461538453e+02 2.207663421630859375e+02 -3.526245117187500000e+00 1.077209040522575378e-01 5.882353186607360840e-01 1.840190185546875000e+03 7.995078563690185547e-01 5.000000000000000000e+00 3.000000000000000000e+00 1.909464836120605469e+01 4.059087829589843750e+02 9.925000000000000000e+01 5.525000000000000000e+01
2.900000000000000000e+01 4.412538461538462116e+02 2.169656982421875000e+02 -3.468627929687500000e+00 1.010142937302589417e-01 5.882353186607360840e-01 1.863548339843750000e+03 7.899534702301025391e-01 5.000000000000000000e+00 3.000000000000000000e+00 -7.497610351562500000e+03 4.683234252929687500e+02 9.975000000000000000e+01 5.525000000000000000e+01
4.600000000000000000e+01 4.200230769230768146e+02 2.090479888916015625e+02 -3.225738525390625000e+00 1.584822088479995728e-01 9.411764740943908691e-01 1.947650024414062500e+03 7.920686006546020508e-01 5.000000000000000000e+00 4.000000000000000000e+00 -1.000000000000000000e+04 5.459280395507812500e+02 1.012500000000000000e+02 5.525000000000000000e+01
3.500000000000000000e+01 4.226692307692306940e+02 2.065424804687500000e+02 -3.178283691406250000e+00 1.334865391254425049e-01 3.529411852359771729e-01 1.974208251953125000e+03 1.189375877380371094e+00 5.000000000000000000e+00 3.000000000000000000e+00 -4.992632324218750000e+03 4.583719177246093750e+02 1.017500000000000000e+02 5.525000000000000000e+01
6.900000000000000000e+01 4.420000000000000568e+02 1.924774322509765625e+02 -3.083374023437500000e+00 2.257965952157974243e-01 0.000000000000000000e+00 2.027324829101562500e+03 7.717245221138000488e-01 1.300000000000000000e+01 4.000000000000000000e+00 -7.497956542968750000e+03 5.616228027343750000e+02 1.027500000000000000e+02 5.525000000000000000e+01
6.500000000000000000e+01 4.415076923076920821e+02 1.885640716552734375e+02 -3.098266601562500000e+00 2.591113150119781494e-01 5.294117927551269531e-01 2.045767822265625000e+03 7.662205100059509277e-01 1.300000000000000000e+01 4.000000000000000000e+00 -2.493012207031250000e+03 5.230980224609375000e+02 1.032500000000000000e+02 5.525000000000000000e+01
5.800000000000000000e+01 4.439923076923078611e+02 1.928953094482421875e+02 -3.300231933593750000e+00 2.703326344490051270e-01 5.882353186607360840e-01 2.039864990234375000e+03 7.567326426506042480e-01 1.300000000000000000e+01 4.000000000000000000e+00 -4.990509277343750000e+03 5.303126220703125000e+02 1.037500000000000000e+02 5.525000000000000000e+01
5.700000000000000000e+01 4.382153846153844370e+02 2.046344451904296875e+02 -3.704223632812500000e+00 3.481129407882690430e-01 5.882353186607360840e-01 2.028059326171875000e+03 7.354872822761535645e-01 1.300000000000000000e+01 4.000000000000000000e+00 -1.000000000000000000e+04 7.600540771484375000e+02 1.047500000000000000e+02 5.525000000000000000e+01
6.400000000000000000e+01 4.275846153846157449e+02 2.096269683837890625e+02 -4.038116455078125000e+00 5.978198051452636719e-01 2.941176593303680420e-01 2.000235229492187500e+03 7.359827756881713867e-01 1.300000000000000000e+01 4.000000000000000000e+00 -1.000000000000000000e+04 7.288397216796875000e+02 1.052500000000000000e+02 5.525000000000000000e+01
6.500000000000000000e+01 4.398846153846154721e+02 2.118472747802734375e+02 -4.503967285156250000e+00 6.270772218704223633e-01 5.294117927551269531e-01 1.950489746093750000e+03 7.233444452285766602e-01 1.300000000000000000e+01 4.000000000000000000e+00 -7.501094238281250000e+03 9.284787597656250000e+02 1.057500000000000000e+02 5.525000000000000000e+01
2.000000000000000000e+01 4.577923076923074746e+02 2.108557281494140625e+02 -4.969818115234375000e+00 6.096865534782409668e-01 3.529411852359771729e-01 1.900744262695312500e+03 7.028905153274536133e-01 1.300000000000000000e+01 3.000000000000000000e+00 -1.000000000000000000e+04 9.870436401367187500e+02 1.062500000000000000e+02 5.525000000000000000e+01
5.800000000000000000e+01 4.310461538461540272e+02 2.078888854980468750e+02 -5.435668945312500000e+00 5.837615132331848145e-01 5.882353186607360840e-01 1.850998901367187500e+03 7.131136059761047363e-01 1.300000000000000000e+01 4.000000000000000000e+00 -1.000000000000000000e+04 8.361236572265625000e+02 1.067500000000000000e+02 5.525000000000000000e+01
6.200000000000000000e+01 4.213153846153846303e+02 2.057091522216796875e+02 -6.120788574218750000e+00 5.596568584442138672e-01 2.941176593303680420e-01 1.767890380859375000e+03 7.329359650611877441e-01 1.300000000000000000e+01 4.000000000000000000e+00 -1.000000000000000000e+04 8.156826171875000000e+02 1.072500000000000000e+02 5.525000000000000000e+01
2.700000000000000000e+01 3.958076923076923777e+02 2.075611114501953125e+02 -6.879028320312500000e+00 2.974175214767456055e-01 0.000000000000000000e+00 1.673660888671875000e+03 7.420256137847900391e-01 1.300000000000000000e+01 3.000000000000000000e+00 -7.498348144531250000e+03 5.056759338378906250e+02 1.077500000000000000e+02 5.525000000000000000e+01
3.800000000000000000e+01 4.133923076923079520e+02 2.123455047607421875e+02 -7.637268066406250000e+00 4.824739992618560791e-01 5.294117927551269531e-01 1.579431396484375000e+03 7.020485401153564453e-01 1.300000000000000000e+01 3.000000000000000000e+00 -1.000000000000000000e+04 7.050807495117187500e+02 1.082500000000000000e+02 5.525000000000000000e+01
1.000000000000000000e+00 5.149615384615383391e+02 1.710754852294921875e+02 -1.041601562500000000e+01 9.972910881042480469e-01 0.000000000000000000e+00 1.272466674804687500e+03 1.077628850936889648e+00 1.300000000000000000e+01 1.000000000000000000e+00 -1.000000000000000000e+04 1.786374511718750000e+03 1.107500000000000000e+02 5.525000000000000000e+01
6.000000000000000000e+00 5.181769230769232308e+02 1.635852203369140625e+02 -1.059188842773437500e+01 9.443387389183044434e-01 5.882352963089942932e-02 1.270077514648437500e+03 1.978292703628540039e+00 1.300000000000000000e+01 1.000000000000000000e+00 -7.497961914062500000e+03 1.517287231445312500e+03 1.117500000000000000e+02 5.525000000000000000e+01
1.800000000000000000e+01 4.881769230769230035e+02 1.720521850585937500e+02 -1.067984008789062500e+01 8.604444861412048340e-01 2.352941185235977173e-01 1.268882812500000000e+03 1.562276482582092285e+00 1.300000000000000000e+01 1.000000000000000000e+00 -4.992315429687500000e+03 1.311569702148437500e+03 1.122500000000000000e+02 5.525000000000000000e+01
1.400000000000000000e+01 4.802461538461537884e+02 1.816458740234375000e+02 -1.062640380859375000e+01 8.973290324211120605e-01 6.470588445663452148e-01 1.270165893554687500e+03 1.306327700614929199e+00 1.500000000000000000e+01 1.000000000000000000e+00 -1.000000000000000000e+04 1.305894897460937500e+03 1.127500000000000000e+02 5.525000000000000000e+01
1.300000000000000000e+01 4.687384615384615927e+02 1.798892364501953125e+02 -1.004208374023437500e+01 8.942793011665344238e-01 5.294117927551269531e-01 1.281447998046875000e+03 1.181594491004943848e+00 1.300000000000000000e+01 1.000000000000000000e+00 -2.489156738281250000e+03 1.251196166992187500e+03 1.142500000000000000e+02 5.525000000000000000e+01
2.100000000000000000e+01 4.666692307692308077e+02 1.833948364257812500e+02 -9.813232421875000000e+00 8.331143856048583984e-01 3.529411852359771729e-01 1.306873901367187500e+03 1.189074873924255371e+00 8.000000000000000000e+00 3.000000000000000000e+00 -4.994916992187500000e+03 1.387219482421875000e+03 1.147500000000000000e+02 5.525000000000000000e+01
2.000000000000000000e+00 4.567153846153844938e+02 1.863086090087890625e+02 -9.572998046875000000e+00 9.872943758964538574e-01 2.352941185235977173e-01 1.339521606445312500e+03 1.345438957214355469e+00 8.000000000000000000e+00 1.000000000000000000e+00 -7.496792480468750000e+03 1.578334716796875000e+03 1.152500000000000000e+02 5.525000000000000000e+01
2.800000000000000000e+01 4.334461538461540613e+02 1.911399993896484375e+02 -9.332733154296875000e+00 6.783521175384521484e-01 9.411764740943908691e-01 1.372169311523437500e+03 1.680161118507385254e+00 1.300000000000000000e+01 3.000000000000000000e+00 1.885472679138183594e+01 9.542718505859375000e+02 1.157500000000000000e+02 5.525000000000000000e+01
2.300000000000000000e+01 4.267384615384613653e+02 1.945606536865234375e+02 -9.092498779296875000e+00 7.259631156921386719e-01 8.235294222831726074e-01 1.404817138671875000e+03 1.732948064804077148e+00 1.300000000000000000e+01 3.000000000000000000e+00 -1.000000000000000000e+04 9.285840454101562500e+02 1.162500000000000000e+02 5.525000000000000000e+01
2.800000000000000000e+01 4.293923076923076678e+02 1.997488708496093750e+02 -9.024475097656250000e+00 5.373514890670776367e-01 5.882352963089942932e-02 1.406535034179687500e+03 1.693899035453796387e+00 1.300000000000000000e+01 3.000000000000000000e+00 9.686241149902343750e+00 7.510307006835937500e+02 1.172500000000000000e+02 5.525000000000000000e+01
2.000000000000000000e+01 4.318307692307693060e+02 1.961890411376953125e+02 -8.990478515625000000e+00 8.113075494766235352e-01 5.882352963089942932e-02 1.407394042968750000e+03 1.648645877838134766e+00 1.300000000000000000e+01 3.000000000000000000e+00 -7.495771972656250000e+03 9.935231933593750000e+02 1.177500000000000000e+02 5.525000000000000000e+01
2.000000000000000000e+01 4.381153846153848122e+02 1.914931488037109375e+02 -8.865875244140625000e+00 7.140964269638061523e-01 1.176470592617988586e-01 1.432979980468750000e+03 1.622905492782592773e+00 1.300000000000000000e+01 3.000000000000000000e+00 -7.498088378906250000e+03 8.682789916992187500e+02 1.187500000000000000e+02 5.525000000000000000e+01
4.900000000000000000e+01 4.530769230769227534e+02 1.884218292236328125e+02 -8.707336425781250000e+00 7.766884565353393555e-01 5.882353186607360840e-01 1.472886718750000000e+03 1.690443873405456543e+00 1.300000000000000000e+01 4.000000000000000000e+00 -1.000000000000000000e+04 9.536503295898437500e+02 1.197500000000000000e+02 5.525000000000000000e+01
3.000000000000000000e+01 4.454615384615383391e+02 1.913907928466796875e+02 -8.609191894531250000e+00 7.635715007781982422e-01 1.058823585510253906e+00 1.498793334960937500e+03 1.749632835388183594e+00 1.300000000000000000e+01 3.000000000000000000e+00 -7.497948242187500000e+03 6.886951293945312500e+02 1.202500000000000000e+02 5.525000000000000000e+01
6.000000000000000000e+01 4.649846153846154948e+02 1.978694152832031250e+02 -8.492187500000000000e+00 6.701540946960449219e-01 5.882353186607360840e-01 1.530652954101562500e+03 1.751284360885620117e+00 1.300000000000000000e+01 4.000000000000000000e+00 -7.498900390625000000e+03 8.274373168945312500e+02 1.207500000000000000e+02 5.525000000000000000e+01
4.100000000000000000e+01 4.705384615384615472e+02 2.065132904052734375e+02 -8.375183105468750000e+00 6.970779299736022949e-01 5.882352963089942932e-02 1.562512695312500000e+03 1.751641035079956055e+00 1.300000000000000000e+01 3.000000000000000000e+00 -4.997819335937500000e+03 8.064133300781250000e+02 1.212500000000000000e+02 5.525000000000000000e+01
1.100000000000000000e+01 4.825307692307691241e+02 2.185900726318359375e+02 -8.258178710937500000e+00 6.161957383155822754e-01 6.470588445663452148e-01 1.594372436523437500e+03 1.749933838844299316e+00 1.300000000000000000e+01 1.000000000000000000e+00 -1.000000000000000000e+04 6.561840820312500000e+02 1.217500000000000000e+02 5.525000000000000000e+01
4.000000000000000000e+01 4.976307692307692037e+02 2.351396179199218750e+02 -8.194732666015625000e+00 6.893915534019470215e-01 2.941176593303680420e-01 1.609974121093750000e+03 1.742104768753051758e+00 1.300000000000000000e+01 3.000000000000000000e+00 -4.998144042968750000e+03 7.473641357421875000e+02 1.222500000000000000e+02 5.525000000000000000e+01
3.800000000000000000e+01 5.147769230769229125e+02 2.551240539550781250e+02 -8.149139404296875000e+00 6.942424178123474121e-01 8.235294222831726074e-01 1.620156494140625000e+03 1.732528805732727051e+00 1.300000000000000000e+01 3.000000000000000000e+00 -1.000000000000000000e+04 7.112343139648437500e+02 1.227500000000000000e+02 5.525000000000000000e+01
1.200000000000000000e+01 5.323384615384615017e+02 2.689298400878906250e+02 -8.103576660156250000e+00 5.789086818695068359e-01 1.411764740943908691e+00 1.630338867187500000e+03 1.720363259315490723e+00 5.000000000000000000e+00 1.000000000000000000e+00 -4.995437988281250000e+03 5.663284301757812500e+02 1.232500000000000000e+02 5.525000000000000000e+01
2.800000000000000000e+01 5.603692307692309669e+02 2.751211547851562500e+02 -8.057983398437500000e+00 8.716410994529724121e-01 1.117647051811218262e+00 1.640521240234375000e+03 1.707304239273071289e+00 1.300000000000000000e+01 3.000000000000000000e+00 -7.499036621093750000e+03 8.621638793945312500e+02 1.237500000000000000e+02 5.525000000000000000e+01
1.500000000000000000e+01 5.830923076923079407e+02 2.799295043945312500e+02 -8.031250000000000000e+00 7.736222743988037109e-01 0.000000000000000000e+00 1.657600585937500000e+03 1.720433712005615234e+00 1.300000000000000000e+01 1.000000000000000000e+00 -4.989057617187500000e+03 7.644660034179687500e+02 1.242500000000000000e+02 5.525000000000000000e+01
2.800000000000000000e+01 5.911769230769230035e+02 2.828208312988281250e+02 -8.004486083984375000e+00 6.761190295219421387e-01 5.882353186607360840e-01 1.674679809570312500e+03 1.754817247390747070e+00 1.300000000000000000e+01 3.000000000000000000e+00 -4.986792968750000000e+03 6.286379394531250000e+02 1.247500000000000000e+02 5.525000000000000000e+01
5.300000000000000000e+01 6.014384615384618655e+02 2.841880493164062500e+02 -7.977752685546875000e+00 7.543697357177734375e-01 8.823529481887817383e-01 1.691759033203125000e+03 1.770789623260498047e+00 1.300000000000000000e+01 4.000000000000000000e+00 1.652455329895019531e+01 6.523740234375000000e+02 1.252500000000000000e+02 5.525000000000000000e+01
1.900000000000000000e+01 6.166615384615383846e+02 2.859606018066406250e+02 -7.985900878906250000e+00 7.903192043304443359e-01 7.058823704719543457e-01 1.701993286132812500e+03 1.763976097106933594e+00 1.300000000000000000e+01 1.000000000000000000e+00 7.511981010437011719e+00 6.421347045898437500e+02 1.257500000000000000e+02 5.525000000000000000e+01
1.800000000000000000e+01 6.204461538461539476e+02 2.877734375000000000e+02 -8.098754882812500000e+00 8.319246768951416016e-01 3.529411852359771729e-01 1.691692016601562500e+03 1.775655627250671387e+00 1.300000000000000000e+01 1.000000000000000000e+00 -2.489165527343750000e+03 7.365180664062500000e+02 1.262500000000000000e+02 5.525000000000000000e+01
4.600000000000000000e+01 6.154076923076926278e+02 2.854108581542968750e+02 -8.211639404296875000e+00 6.912292242050170898e-01 5.882352963089942932e-02 1.681390747070312500e+03 1.833954930305480957e+00 1.300000000000000000e+01 4.000000000000000000e+00 -4.994919921875000000e+03 5.529537963867187500e+02 1.267500000000000000e+02 5.525000000000000000e+01
4.300000000000000000e+01 6.006461538461534246e+02 2.817420959472656250e+02 -8.324493408203125000e+00 5.363125205039978027e-01 5.882353186607360840e-01 1.671089477539062500e+03 1.876584291458129883e+00 1.300000000000000000e+01 3.000000000000000000e+00 1.263505172729492188e+01 5.046882019042968750e+02 1.272500000000000000e+02 5.525000000000000000e+01
1.900000000000000000e+01 5.953153846153843460e+02 2.777777099609375000e+02 -8.549621582031250000e+00 6.896821856498718262e-01 2.941176593303680420e-01 1.649793334960937500e+03 1.870161652565002441e+00 1.300000000000000000e+01 1.000000000000000000e+00 -1.000000000000000000e+04 6.083938598632812500e+02 1.277500000000000000e+02 5.525000000000000000e+01
1.300000000000000000e+01 5.816230769230770647e+02 2.733899841308593750e+02 -8.887023925781250000e+00 6.410599350929260254e-01 2.941176593303680420e-01 1.617502441406250000e+03 1.833407044410705566e+00 1.300000000000000000e+01 1.000000000000000000e+00 -1.000000000000000000e+04 5.102746887207031250e+02 1.282500000000000000e+02 5.525000000000000000e+01
2.700000000000000000e+01 5.771692307692309214e+02 2.692661437988281250e+02 -9.224426269531250000e+00 8.362258672714233398e-01 5.882353186607360840e-01 1.585211425781250000e+03 1.803758144378662109e+00 1.300000000000000000e+01 3.000000000000000000e+00 1.208043766021728516e+01 6.465703125000000000e+02 1.287500000000000000e+02 5.525000000000000000e+01
2.800000000000000000e+01 5.660461538461535156e+02 2.632315979003906250e+02 -9.561828613281250000e+00 8.171681165695190430e-01 6.470588445663452148e-01 1.552920532226562500e+03 1.775101423263549805e+00 1.300000000000000000e+01 3.000000000000000000e+00 2.884879684448242188e+01 6.364504394531250000e+02 1.292500000000000000e+02 5.525000000000000000e+01
2.600000000000000000e+01 5.515384615384617746e+02 2.561259765625000000e+02 -9.794403076171875000e+00 9.052172303199768066e-01 5.882352963089942932e-02 1.528298950195312500e+03 1.729557633399963379e+00 1.300000000000000000e+01 3.000000000000000000e+00 -7.498811035156250000e+03 7.418870239257812500e+02 1.297500000000000000e+02 5.525000000000000000e+01
2.100000000000000000e+01 5.372307692307692832e+02 2.491617126464843750e+02 -9.992004394531250000e+00 8.646577000617980957e-01 5.882353186607360840e-01 1.506233886718750000e+03 1.713241815567016602e+00 1.300000000000000000e+01 3.000000000000000000e+00 -4.990349121093750000e+03 9.208139648437500000e+02 1.302500000000000000e+02 5.525000000000000000e+01
4.200000000000000000e+01 5.410769230769233218e+02 2.461178283691406250e+02 -1.018960571289062500e+01 9.308399558067321777e-01 5.882353186607360840e-01 1.484168823242187500e+03 1.641013145446777344e+00 1.300000000000000000e+01 3.000000000000000000e+00 1.308902359008789062e+01 1.118528198242187500e+03 1.307500000000000000e+02 5.525000000000000000e+01
6.500000000000000000e+01 5.594615384615383391e+02 2.457318115234375000e+02 -1.038720703125000000e+01 9.679844975471496582e-01 0.000000000000000000e+00 1.462103759765625000e+03 1.536242723464965820e+00 1.300000000000000000e+01 4.000000000000000000e+00 1.856949234008789062e+01 1.180581176757812500e+03 1.312500000000000000e+02 5.525000000000000000e+01
1.900000000000000000e+01 5.738076923076921503e+02 2.435062255859375000e+02 -1.023373413085937500e+01 9.705560803413391113e-01 2.941176593303680420e-01 1.457254272460937500e+03 1.533988952636718750e+00 1.300000000000000000e+01 1.000000000000000000e+00 2.055557441711425781e+01 1.199803588867187500e+03 1.317500000000000000e+02 5.525000000000000000e+01
1.600000000000000000e+01 5.614384615384615245e+02 2.422711639404296875e+02 -1.008023071289062500e+01 9.789227247238159180e-01 1.176470592617988586e-01 1.452404663085937500e+03 1.620938539505004883e+00 1.300000000000000000e+01 1.000000000000000000e+00 -2.487876220703125000e+03 1.011489868164062500e+03 1.322500000000000000e+02 5.525000000000000000e+01
2.100000000000000000e+01 5.703076923076921503e+02 2.448326416015625000e+02 -9.926757812500000000e+00 8.870065808296203613e-01 0.000000000000000000e+00 1.447555175781250000e+03 1.492078304290771484e+00 1.300000000000000000e+01 3.000000000000000000e+00 2.070145988464355469e+01 1.084895385742187500e+03 1.327500000000000000e+02 5.525000000000000000e+01
4.000000000000000000e+00 5.855846153846151765e+02 2.568553161621093750e+02 -9.708801269531250000e+00 9.310564994812011719e-01 5.882352963089942932e-02 1.448247314453125000e+03 1.619598150253295898e+00 1.300000000000000000e+01 1.000000000000000000e+00 1.991911315917968750e+01 9.584006958007812500e+02 1.332500000000000000e+02 5.525000000000000000e+01
2.900000000000000000e+01 5.963153846153844597e+02 2.640592041015625000e+02 -9.297454833984375000e+00 9.257177710533142090e-01 1.176470592617988586e-01 1.465564453125000000e+03 1.609496831893920898e+00 1.300000000000000000e+01 3.000000000000000000e+00 -2.486372802734375000e+03 8.488781127929687500e+02 1.337500000000000000e+02 5.525000000000000000e+01
5.900000000000000000e+01 6.153538461538465754e+02 2.727234497070312500e+02 -8.886108398437500000e+00 9.257729649543762207e-01 1.176470592617988586e-01 1.482881591796875000e+03 1.605426549911499023e+00 1.300000000000000000e+01 4.000000000000000000e+00 -4.991114257812500000e+03 7.545379638671875000e+02 1.342500000000000000e+02 5.525000000000000000e+01
2.400000000000000000e+01 6.406769230769230035e+02 2.957594299316406250e+02 -8.474761962890625000e+00 7.279038429260253906e-01 5.294117927551269531e-01 1.500198730468750000e+03 1.633109450340270996e+00 1.300000000000000000e+01 3.000000000000000000e+00 -7.496884277343750000e+03 4.518552856445312500e+02 1.347500000000000000e+02 5.525000000000000000e+01
4.300000000000000000e+01 6.543615384615386574e+02 3.252274169921875000e+02 -7.953735351562500000e+00 6.890690326690673828e-01 4.705882370471954346e-01 1.523347778320312500e+03 9.743620753288269043e-01 1.300000000000000000e+01 3.000000000000000000e+00 1.427501010894775391e+01 3.752162170410156250e+02 1.352500000000000000e+02 5.525000000000000000e+01
1.000000000000000000e+01 6.757076923076921275e+02 2.932659301757812500e+02 -8.823547363281250000e-01 9.999999776482582092e-03 0.000000000000000000e+00 1.211529907226562500e+03 6.241852641105651855e-01 1.500000000000000000e+01 1.000000000000000000e+00 -1.000000000000000000e+04 1.299378356933593750e+02 1.562500000000000000e+02 5.525000000000000000e+01
4.500000000000000000e+01 7.124923076923080316e+02 2.754397888183593750e+02 -2.533599853515625000e+00 1.924170106649398804e-01 0.000000000000000000e+00 1.176662597656250000e+03 1.200154781341552734e+00 1.200000000000000000e+01 4.000000000000000000e+00 -7.500738281250000000e+03 6.506279296875000000e+02 1.572500000000000000e+02 5.525000000000000000e+01
2.800000000000000000e+01 7.296923076923078497e+02 2.783370971679687500e+02 -2.982360839843750000e+00 8.088402748107910156e-01 0.000000000000000000e+00 1.173990722656250000e+03 9.485530853271484375e-01 1.200000000000000000e+01 3.000000000000000000e+00 -1.000000000000000000e+04 9.738254394531250000e+02 1.577500000000000000e+02 5.525000000000000000e+01
2.400000000000000000e+01 7.340307692307690104e+02 3.057278137207031250e+02 -3.054260253906250000e+00 3.024362921714782715e-01 0.000000000000000000e+00 1.186080688476562500e+03 1.013406634330749512e+00 1.300000000000000000e+01 3.000000000000000000e+00 -1.000000000000000000e+04 6.110989990234375000e+02 1.582500000000000000e+02 5.525000000000000000e+01
6.000000000000000000e+01 7.273769230769230489e+02 3.326497192382812500e+02 -3.126129150390625000e+00 9.999999776482582092e-03 2.941176593303680420e-01 1.198170776367187500e+03 1.297802448272705078e+00 3.000000000000000000e+00 4.000000000000000000e+00 -1.000000000000000000e+04 2.371085205078125000e+02 1.587500000000000000e+02 5.525000000000000000e+01
3.500000000000000000e+01 7.219461538461540613e+02 3.537549438476562500e+02 -3.198028564453125000e+00 9.999999776482582092e-03 5.882352963089942932e-02 1.210260742187500000e+03 1.298306822776794434e+00 3.000000000000000000e+00 3.000000000000000000e+00 1.611153793334960938e+01 1.213161315917968750e+02 1.592500000000000000e+02 5.525000000000000000e+01
6.200000000000000000e+01 7.251384615384614563e+02 4.005308227539062500e+02 -2.848754882812500000e+00 9.999999776482582092e-03 0.000000000000000000e+00 1.216509887695312500e+03 1.280106544494628906e+00 3.000000000000000000e+00 4.000000000000000000e+00 -2.488781250000000000e+03 4.328481140136718750e+02 1.597500000000000000e+02 5.525000000000000000e+01
1.300000000000000000e+01 7.393692307692308532e+02 4.894324035644531250e+02 -2.359069824218750000e+00 2.160327136516571045e-01 0.000000000000000000e+00 1.220812011718750000e+03 1.340388178825378418e+00 1.200000000000000000e+01 1.000000000000000000e+00 -7.496931152343750000e+03 6.501206054687500000e+02 1.602500000000000000e+02 5.525000000000000000e+01
3.000000000000000000e+00 7.456230769230767237e+02 4.943263549804687500e+02 -1.869415283203125000e+00 2.521164119243621826e-01 0.000000000000000000e+00 1.225114013671875000e+03 7.846171259880065918e-01 1.200000000000000000e+01 1.000000000000000000e+00 -7.497650878906250000e+03 7.599642333984375000e+02 1.607500000000000000e+02 5.525000000000000000e+01
9.000000000000000000e+00 7.204615384615382254e+02 4.806332092285156250e+02 -1.379730224609375000e+00 2.581066787242889404e-01 0.000000000000000000e+00 1.229416137695312500e+03 1.001088380813598633e+00 1.200000000000000000e+01 1.000000000000000000e+00 -1.000050000000000000e+04 6.536126708984375000e+02 1.612500000000000000e+02 5.525000000000000000e+01
[truncated: 1,657,440 more chars]
