# Supplementary material for: Environmental Conditions for Alternative Tree Cover States in HighLatitudes
Source: Copernicus journal article supplement (doi:10.5194/bg-2016-401), 2016-10-11
Supplement: Supplementary file 4 [file bg-2016-401-supplement.zip › Analysis/files_to_load_and_import/boreal_ea_europe_database.txt]

6.000000000000000000e+00 8.939076923076925141e+02 3.799632873535156250e+02 9.344726562500000000e+00 0.000000000000000000e+00 0.000000000000000000e+00 4.089642578125000000e+03 4.084489822387695312e+00 5.000000000000000000e+00 1.000000000000000000e+00 1.473168487548828125e+02 3.750000000000000000e+00 5.025000000000000000e+01
6.900000000000000000e+01 1.047484615384615381e+03 5.419167480468750000e+02 8.124877929687500000e+00 0.000000000000000000e+00 0.000000000000000000e+00 3.758247802734375000e+03 3.866378307342529297e+00 4.000000000000000000e+00 4.000000000000000000e+00 4.837304687500000000e+02 6.250000000000000000e+00 5.025000000000000000e+01
1.000000000000000000e+01 9.266076923076919911e+02 4.385803527832031250e+02 7.890533447265625000e+00 0.000000000000000000e+00 0.000000000000000000e+00 3.693072753906250000e+03 3.881037950515747070e+00 4.000000000000000000e+00 1.000000000000000000e+00 5.417729492187500000e+02 6.750000000000000000e+00 5.025000000000000000e+01
3.300000000000000000e+01 7.496769230769225487e+02 4.128960266113281250e+02 6.730560302734375000e+00 0.000000000000000000e+00 0.000000000000000000e+00 3.362058349609375000e+03 3.120617866516113281e+00 4.000000000000000000e+00 3.000000000000000000e+00 3.809897155761718750e+02 9.750000000000000000e+00 5.025000000000000000e+01
7.000000000000000000e+01 6.376769230769227761e+02 4.068925476074218750e+02 6.314788818359375000e+00 0.000000000000000000e+00 0.000000000000000000e+00 3.248278808593750000e+03 3.694885492324829102e+00 4.000000000000000000e+00 4.000000000000000000e+00 4.127864074707031250e+02 1.125000000000000000e+01 5.025000000000000000e+01
4.000000000000000000e+00 7.019538461538458023e+02 3.936773071289062500e+02 6.258270263671875000e+00 0.000000000000000000e+00 0.000000000000000000e+00 3.239178710937500000e+03 3.619990110397338867e+00 4.000000000000000000e+00 1.000000000000000000e+00 6.020910644531250000e+02 1.175000000000000000e+01 5.025000000000000000e+01
3.100000000000000000e+01 6.967538461538465526e+02 3.620275268554687500e+02 6.201751708984375000e+00 0.000000000000000000e+00 0.000000000000000000e+00 3.230078613281250000e+03 3.606309652328491211e+00 4.000000000000000000e+00 3.000000000000000000e+00 5.811096191406250000e+02 1.225000000000000000e+01 5.025000000000000000e+01
6.000000000000000000e+00 6.174384615384616382e+02 3.399205932617187500e+02 6.087493896484375000e+00 0.000000000000000000e+00 0.000000000000000000e+00 3.216045654296875000e+03 3.708185434341430664e+00 8.000000000000000000e+00 1.000000000000000000e+00 4.377872314453125000e+02 1.325000000000000000e+01 5.025000000000000000e+01
6.000000000000000000e+00 6.397461538461539021e+02 3.241922302246093750e+02 5.848907470703125000e+00 0.000000000000000000e+00 2.941176593303680420e-01 3.248097412109375000e+03 3.873911619186401367e+00 7.000000000000000000e+00 1.000000000000000000e+00 2.197875213623046875e+02 1.525000000000000000e+01 5.025000000000000000e+01
1.600000000000000000e+01 8.825923076923077133e+02 3.594293823242187500e+02 5.704772949218750000e+00 0.000000000000000000e+00 2.941176593303680420e-01 3.281436035156250000e+03 3.528355598449707031e+00 4.000000000000000000e+00 1.000000000000000000e+00 6.434946899414062500e+02 1.675000000000000000e+01 5.025000000000000000e+01
4.100000000000000000e+01 8.755307692307687830e+02 3.838501281738281250e+02 5.697357177734375000e+00 0.000000000000000000e+00 5.882353186607360840e-01 3.292209472656250000e+03 3.518067359924316406e+00 4.000000000000000000e+00 3.000000000000000000e+00 6.589221191406250000e+02 1.725000000000000000e+01 5.025000000000000000e+01
1.700000000000000000e+01 6.492846153846154493e+02 3.354954528808593750e+02 5.274169921875000000e+00 0.000000000000000000e+00 0.000000000000000000e+00 3.202254638671875000e+03 3.890549659729003906e+00 3.000000000000000000e+00 1.000000000000000000e+00 2.079707641601562500e+02 2.175000000000000000e+01 5.025000000000000000e+01
5.700000000000000000e+01 6.837615384615384073e+02 2.747684936523437500e+02 5.128265380859375000e+00 0.000000000000000000e+00 0.000000000000000000e+00 3.153944335937500000e+03 3.833923578262329102e+00 8.000000000000000000e+00 4.000000000000000000e+00 2.461745147705078125e+02 2.325000000000000000e+01 5.025000000000000000e+01
1.300000000000000000e+01 7.020307692307698062e+02 3.284448547363281250e+02 5.154327392578125000e+00 0.000000000000000000e+00 5.294117927551269531e-01 3.164246826171875000e+03 3.780141592025756836e+00 4.000000000000000000e+00 1.000000000000000000e+00 2.140594940185546875e+02 2.525000000000000000e+01 5.025000000000000000e+01
4.700000000000000000e+01 6.284769230769231854e+02 3.126645202636718750e+02 5.222900390625000000e+00 0.000000000000000000e+00 1.117647051811218262e+00 3.184010253906250000e+03 3.816481828689575195e+00 4.000000000000000000e+00 4.000000000000000000e+00 2.303730926513671875e+02 2.575000000000000000e+01 5.025000000000000000e+01
4.900000000000000000e+01 5.221769230769231172e+02 3.289512329101562500e+02 5.418853759765625000e+00 0.000000000000000000e+00 1.058823585510253906e+00 3.245002441406250000e+03 3.972846746444702148e+00 5.000000000000000000e+00 4.000000000000000000e+00 2.390455169677734375e+02 2.675000000000000000e+01 5.025000000000000000e+01
6.600000000000000000e+01 5.407538461538462116e+02 3.331781616210937500e+02 5.673645019531250000e+00 0.000000000000000000e+00 8.235294222831726074e-01 3.327460693359375000e+03 3.936590433120727539e+00 5.000000000000000000e+00 4.000000000000000000e+00 2.249753265380859375e+02 2.775000000000000000e+01 5.025000000000000000e+01
2.100000000000000000e+01 5.956538461538464162e+02 3.315913696289062500e+02 5.789001464843750000e+00 0.000000000000000000e+00 2.352941185235977173e-01 3.381699218750000000e+03 3.828429937362670898e+00 5.000000000000000000e+00 3.000000000000000000e+00 2.212607116699218750e+02 2.875000000000000000e+01 5.025000000000000000e+01
7.000000000000000000e+00 5.999538461538460297e+02 3.209728393554687500e+02 5.629852294921875000e+00 0.000000000000000000e+00 2.352941185235977173e-01 3.410464843750000000e+03 4.011056423187255859e+00 8.000000000000000000e+00 1.000000000000000000e+00 9.913691711425781250e+01 3.075000000000000000e+01 5.025000000000000000e+01
2.800000000000000000e+01 1.406115384615384301e+03 5.286075439453125000e+02 1.075949096679687500e+01 0.000000000000000000e+00 0.000000000000000000e+00 4.102900390625000000e+03 4.103898525238037109e+00 4.000000000000000000e+00 3.000000000000000000e+00 1.659732971191406250e+02 -4.250000000000000000e+00 5.075000000000000000e+01
2.400000000000000000e+01 1.478992307692307577e+03 5.216942749023437500e+02 1.062036132812500000e+01 0.000000000000000000e+00 0.000000000000000000e+00 4.067772949218750000e+03 4.073854923248291016e+00 4.000000000000000000e+00 3.000000000000000000e+00 1.503616790771484375e+02 -3.750000000000000000e+00 5.075000000000000000e+01
1.600000000000000000e+01 1.022653846153846530e+03 4.893082580566406250e+02 8.347564697265625000e+00 0.000000000000000000e+00 0.000000000000000000e+00 3.795668457031250000e+03 3.985445499420166016e+00 5.000000000000000000e+00 1.000000000000000000e+00 2.494786376953125000e+02 6.250000000000000000e+00 5.075000000000000000e+01
7.000000000000000000e+00 8.472538461538463253e+02 3.916510925292968750e+02 7.942016601562500000e+00 0.000000000000000000e+00 0.000000000000000000e+00 3.691802246093750000e+03 4.023190498352050781e+00 4.000000000000000000e+00 1.000000000000000000e+00 1.256044921875000000e+02 7.250000000000000000e+00 5.075000000000000000e+01
1.800000000000000000e+01 8.273307692307687375e+02 4.278918762207031250e+02 7.761077880859375000e+00 0.000000000000000000e+00 0.000000000000000000e+00 3.645025634765625000e+03 3.920137166976928711e+00 4.000000000000000000e+00 1.000000000000000000e+00 2.589476623535156250e+02 7.750000000000000000e+00 5.075000000000000000e+01
1.500000000000000000e+01 7.944153846153845961e+02 4.535445251464843750e+02 7.601959228515625000e+00 0.000000000000000000e+00 0.000000000000000000e+00 3.603405517578125000e+03 3.849548339843750000e+00 4.000000000000000000e+00 1.000000000000000000e+00 3.174274902343750000e+02 8.250000000000000000e+00 5.075000000000000000e+01
6.100000000000000000e+01 7.001461538461539931e+02 4.212205200195312500e+02 7.018432617187500000e+00 0.000000000000000000e+00 0.000000000000000000e+00 3.451301513671875000e+03 3.672149896621704102e+00 8.000000000000000000e+00 4.000000000000000000e+00 4.238461608886718750e+02 1.025000000000000000e+01 5.075000000000000000e+01
2.400000000000000000e+01 6.599692307692309896e+02 4.284148864746093750e+02 6.889587402343750000e+00 0.000000000000000000e+00 0.000000000000000000e+00 3.417896484375000000e+03 3.685179233551025391e+00 8.000000000000000000e+00 3.000000000000000000e+00 5.834567871093750000e+02 1.075000000000000000e+01 5.075000000000000000e+01
1.000000000000000000e+01 6.371307692307693742e+02 3.755132751464843750e+02 6.521179199218750000e+00 0.000000000000000000e+00 0.000000000000000000e+00 3.341710205078125000e+03 3.776959896087646484e+00 4.000000000000000000e+00 1.000000000000000000e+00 4.863275451660156250e+02 1.325000000000000000e+01 5.075000000000000000e+01
1.300000000000000000e+01 6.527230769230772012e+02 3.228570556640625000e+02 6.356445312500000000e+00 0.000000000000000000e+00 0.000000000000000000e+00 3.336311279296875000e+03 3.811800956726074219e+00 8.000000000000000000e+00 1.000000000000000000e+00 3.118829345703125000e+02 1.425000000000000000e+01 5.075000000000000000e+01
3.300000000000000000e+01 9.148076923076926050e+02 5.210087280273437500e+02 6.107238769531250000e+00 0.000000000000000000e+00 0.000000000000000000e+00 3.329358886718750000e+03 3.625502586364746094e+00 4.000000000000000000e+00 3.000000000000000000e+00 1.068143188476562500e+03 1.575000000000000000e+01 5.075000000000000000e+01
6.700000000000000000e+01 7.917692307692309441e+02 3.988592834472656250e+02 6.023468017578125000e+00 0.000000000000000000e+00 4.705882370471954346e-01 3.327423095703125000e+03 3.642560482025146484e+00 4.000000000000000000e+00 4.000000000000000000e+00 5.335010375976562500e+02 1.625000000000000000e+01 5.075000000000000000e+01
1.800000000000000000e+01 7.314230769230766782e+02 3.046778869628906250e+02 5.939697265625000000e+00 0.000000000000000000e+00 2.941176593303680420e-01 3.325487304687500000e+03 3.712829589843750000e+00 5.000000000000000000e+00 1.000000000000000000e+00 2.782361755371093750e+02 1.675000000000000000e+01 5.075000000000000000e+01
2.000000000000000000e+00 6.209076923076920593e+02 2.972361755371093750e+02 5.864959716796875000e+00 0.000000000000000000e+00 2.941176593303680420e-01 3.327221435546875000e+03 3.905868530273437500e+00 8.000000000000000000e+00 1.000000000000000000e+00 1.461931915283203125e+02 1.775000000000000000e+01 5.075000000000000000e+01
4.000000000000000000e+00 6.427615384615385210e+02 2.977863159179687500e+02 5.834228515625000000e+00 0.000000000000000000e+00 0.000000000000000000e+00 3.328488769531250000e+03 3.890635728836059570e+00 3.000000000000000000e+00 1.000000000000000000e+00 2.131969757080078125e+02 1.825000000000000000e+01 5.075000000000000000e+01
6.400000000000000000e+01 6.689769230769229580e+02 3.258710937500000000e+02 5.803497314453125000e+00 0.000000000000000000e+00 0.000000000000000000e+00 3.329756103515625000e+03 3.865473985671997070e+00 3.000000000000000000e+00 4.000000000000000000e+00 2.587360534667968750e+02 1.875000000000000000e+01 5.075000000000000000e+01
2.200000000000000000e+01 6.670846153846157449e+02 3.420926818847656250e+02 5.407257080078125000e+00 0.000000000000000000e+00 0.000000000000000000e+00 3.238762939453125000e+03 3.816845417022705078e+00 5.000000000000000000e+00 3.000000000000000000e+00 2.667979125976562500e+02 2.075000000000000000e+01 5.075000000000000000e+01
4.500000000000000000e+01 6.023538461538462343e+02 3.184656982421875000e+02 5.353912353515625000e+00 0.000000000000000000e+00 0.000000000000000000e+00 3.206300292968750000e+03 3.836387872695922852e+00 5.000000000000000000e+00 4.000000000000000000e+00 1.989369354248046875e+02 2.625000000000000000e+01 5.075000000000000000e+01
1.400000000000000000e+01 6.154999999999998863e+02 3.368023376464843750e+02 5.739715576171875000e+00 0.000000000000000000e+00 8.235294222831726074e-01 3.347575195312500000e+03 3.827493667602539062e+00 5.000000000000000000e+00 1.000000000000000000e+00 1.820599670410156250e+02 2.875000000000000000e+01 5.075000000000000000e+01
1.400000000000000000e+01 6.377846153846156767e+02 3.344827575683593750e+02 5.732696533203125000e+00 0.000000000000000000e+00 9.411764740943908691e-01 3.358182861328125000e+03 3.853354930877685547e+00 5.000000000000000000e+00 1.000000000000000000e+00 1.606826019287109375e+02 2.925000000000000000e+01 5.075000000000000000e+01
4.100000000000000000e+01 6.303153846153844597e+02 3.296268310546875000e+02 5.725677490234375000e+00 0.000000000000000000e+00 8.823529481887817383e-01 3.368790771484375000e+03 3.919407606124877930e+00 5.000000000000000000e+00 3.000000000000000000e+00 1.503325347900390625e+02 2.975000000000000000e+01 5.075000000000000000e+01
2.600000000000000000e+01 6.100692307692307850e+02 3.310242614746093750e+02 5.493530273437500000e+00 0.000000000000000000e+00 0.000000000000000000e+00 3.347495361328125000e+03 3.986069679260253906e+00 8.000000000000000000e+00 3.000000000000000000e+00 9.835674285888671875e+01 3.075000000000000000e+01 5.075000000000000000e+01
1.400000000000000000e+01 6.115076923076921958e+02 3.260119934082031250e+02 5.041137695312500000e+00 0.000000000000000000e+00 1.882352948188781738e+00 3.291069335937500000e+03 3.924918413162231445e+00 8.000000000000000000e+00 1.000000000000000000e+00 1.286432037353515625e+02 3.225000000000000000e+01 5.075000000000000000e+01
1.200000000000000000e+01 9.289846153846156085e+02 3.980159912109375000e+02 1.012402343750000000e+01 0.000000000000000000e+00 0.000000000000000000e+00 3.986443115234375000e+03 4.040466785430908203e+00 8.000000000000000000e+00 1.000000000000000000e+00 9.106877136230468750e+01 -2.250000000000000000e+00 5.125000000000000000e+01
4.000000000000000000e+01 8.649538461538462570e+02 3.931739807128906250e+02 9.130737304687500000e+00 0.000000000000000000e+00 0.000000000000000000e+00 3.913569580078125000e+03 4.120386600494384766e+00 2.000000000000000000e+00 3.000000000000000000e+00 1.629179573059082031e+01 4.750000000000000000e+00 5.125000000000000000e+01
5.000000000000000000e+00 8.893461538461534701e+02 4.114176330566406250e+02 8.126922607421875000e+00 0.000000000000000000e+00 0.000000000000000000e+00 3.707600341796875000e+03 4.135526180267333984e+00 5.000000000000000000e+00 1.000000000000000000e+00 3.978298950195312500e+01 6.750000000000000000e+00 5.125000000000000000e+01
9.000000000000000000e+00 8.994538461538462570e+02 4.429172058105468750e+02 7.930480957031250000e+00 0.000000000000000000e+00 0.000000000000000000e+00 3.663423828125000000e+03 4.063462257385253906e+00 5.000000000000000000e+00 1.000000000000000000e+00 2.559878387451171875e+02 7.250000000000000000e+00 5.125000000000000000e+01
5.900000000000000000e+01 8.974999999999998863e+02 4.721484069824218750e+02 7.760742187500000000e+00 0.000000000000000000e+00 0.000000000000000000e+00 3.626572753906250000e+03 3.866757631301879883e+00 5.000000000000000000e+00 4.000000000000000000e+00 3.618285522460937500e+02 7.750000000000000000e+00 5.125000000000000000e+01
4.900000000000000000e+01 8.715923076923081680e+02 5.075303955078125000e+02 7.617767333984375000e+00 0.000000000000000000e+00 0.000000000000000000e+00 3.597046875000000000e+03 3.750266551971435547e+00 4.000000000000000000e+00 4.000000000000000000e+00 4.353368225097656250e+02 8.250000000000000000e+00 5.125000000000000000e+01
3.600000000000000000e+01 5.484307692307692150e+02 3.235116577148437500e+02 6.655242919921875000e+00 0.000000000000000000e+00 0.000000000000000000e+00 3.404499511718750000e+03 4.006159782409667969e+00 4.000000000000000000e+00 3.000000000000000000e+00 1.598443145751953125e+02 1.375000000000000000e+01 5.125000000000000000e+01
3.000000000000000000e+00 6.550076923076923094e+02 2.896327209472656250e+02 6.382171630859375000e+00 0.000000000000000000e+00 0.000000000000000000e+00 3.387599121093750000e+03 3.905803442001342773e+00 4.000000000000000000e+00 1.000000000000000000e+00 2.156177215576171875e+02 1.575000000000000000e+01 5.125000000000000000e+01
3.000000000000000000e+00 5.786000000000000227e+02 2.756836853027343750e+02 6.136413574218750000e+00 0.000000000000000000e+00 0.000000000000000000e+00 3.371294433593750000e+03 3.914616584777832031e+00 3.000000000000000000e+00 1.000000000000000000e+00 1.785376281738281250e+02 1.775000000000000000e+01 5.125000000000000000e+01
4.000000000000000000e+00 5.851153846153847553e+02 3.136174316406250000e+02 6.046600341796875000e+00 0.000000000000000000e+00 0.000000000000000000e+00 3.364822265625000000e+03 3.911479234695434570e+00 3.000000000000000000e+00 1.000000000000000000e+00 1.774081420898437500e+02 1.875000000000000000e+01 5.125000000000000000e+01
2.100000000000000000e+01 5.492923076923074177e+02 2.929979248046875000e+02 5.462738037109375000e+00 0.000000000000000000e+00 0.000000000000000000e+00 3.226461181640625000e+03 3.856826782226562500e+00 5.000000000000000000e+00 3.000000000000000000e+00 1.361696472167968750e+02 2.175000000000000000e+01 5.125000000000000000e+01
1.300000000000000000e+01 5.586230769230769511e+02 2.752910156250000000e+02 5.265838623046875000e+00 0.000000000000000000e+00 0.000000000000000000e+00 3.175317138671875000e+03 3.822633266448974609e+00 3.000000000000000000e+00 1.000000000000000000e+00 1.900337829589843750e+02 2.325000000000000000e+01 5.125000000000000000e+01
4.000000000000000000e+01 6.256692307692309214e+02 3.216797790527343750e+02 5.186309814453125000e+00 0.000000000000000000e+00 0.000000000000000000e+00 3.158047851562500000e+03 3.836211681365966797e+00 5.000000000000000000e+00 3.000000000000000000e+00 1.665733642578125000e+02 2.475000000000000000e+01 5.125000000000000000e+01
5.700000000000000000e+01 6.565307692307693515e+02 3.163868408203125000e+02 5.231750488281250000e+00 0.000000000000000000e+00 0.000000000000000000e+00 3.171113525390625000e+03 3.817808866500854492e+00 5.000000000000000000e+00 4.000000000000000000e+00 1.657427825927734375e+02 2.525000000000000000e+01 5.125000000000000000e+01
3.400000000000000000e+01 6.186384615384616836e+02 3.169004821777343750e+02 5.401184082031250000e+00 0.000000000000000000e+00 5.882352963089942932e-02 3.223477539062500000e+03 3.860750913619995117e+00 5.000000000000000000e+00 3.000000000000000000e+00 1.596784210205078125e+02 2.675000000000000000e+01 5.125000000000000000e+01
6.100000000000000000e+01 6.278461538461534701e+02 3.368999023437500000e+02 5.612457275390625000e+00 0.000000000000000000e+00 1.176470637321472168e+00 3.296892578125000000e+03 3.828297853469848633e+00 5.000000000000000000e+00 4.000000000000000000e+00 2.045933990478515625e+02 2.825000000000000000e+01 5.125000000000000000e+01
6.600000000000000000e+01 6.290307692307693515e+02 3.233644409179687500e+02 5.312591552734375000e+00 0.000000000000000000e+00 7.647058963775634766e-01 3.284853759765625000e+03 3.934092283248901367e+00 8.000000000000000000e+00 4.000000000000000000e+00 1.313358306884765625e+02 3.075000000000000000e+01 5.125000000000000000e+01
1.600000000000000000e+01 1.527599999999999909e+03 5.718320922851562500e+02 1.081600952148437500e+01 0.000000000000000000e+00 0.000000000000000000e+00 4.210021972656250000e+03 3.990286350250244141e+00 0.000000000000000000e+00 1.000000000000000000e+00 2.779719543457031250e+02 -9.250000000000000000e+00 5.175000000000000000e+01
1.100000000000000000e+01 1.443992307692308259e+03 5.174335327148437500e+02 9.764099121093750000e+00 0.000000000000000000e+00 0.000000000000000000e+00 3.919613525390625000e+03 3.346611261367797852e+00 4.000000000000000000e+00 1.000000000000000000e+00 2.965553894042968750e+02 -3.250000000000000000e+00 5.175000000000000000e+01
4.500000000000000000e+01 1.011423076923076792e+03 4.327250366210937500e+02 9.757537841796875000e+00 0.000000000000000000e+00 0.000000000000000000e+00 3.920809814453125000e+03 4.002108097076416016e+00 5.000000000000000000e+00 4.000000000000000000e+00 1.592286224365234375e+02 -2.750000000000000000e+00 5.175000000000000000e+01
1.400000000000000000e+01 8.380076923076923094e+02 4.058507385253906250e+02 9.750946044921875000e+00 0.000000000000000000e+00 0.000000000000000000e+00 3.922006103515625000e+03 4.036510467529296875e+00 5.000000000000000000e+00 1.000000000000000000e+00 8.487362670898437500e+01 -2.250000000000000000e+00 5.175000000000000000e+01
6.000000000000000000e+00 8.934615384615385665e+02 3.917696533203125000e+02 9.202667236328125000e+00 0.000000000000000000e+00 0.000000000000000000e+00 3.860700439453125000e+03 4.033967494964599609e+00 2.000000000000000000e+00 1.000000000000000000e+00 2.101824045181274414e+00 4.750000000000000000e+00 5.175000000000000000e+01
7.500000000000000000e+01 6.980000000000002274e+02 4.846574096679687500e+02 7.191131591796875000e+00 0.000000000000000000e+00 0.000000000000000000e+00 3.522333740234375000e+03 3.743847846984863281e+00 4.000000000000000000e+00 4.000000000000000000e+00 3.150507202148437500e+02 1.025000000000000000e+01 5.175000000000000000e+01
6.000000000000000000e+00 5.512230769230767464e+02 3.031099548339843750e+02 6.871673583984375000e+00 0.000000000000000000e+00 0.000000000000000000e+00 3.469988281250000000e+03 4.038095474243164062e+00 4.000000000000000000e+00 1.000000000000000000e+00 1.051608886718750000e+02 1.375000000000000000e+01 5.175000000000000000e+01
5.700000000000000000e+01 5.773461538461540385e+02 3.073370666503906250e+02 6.777832031250000000e+00 0.000000000000000000e+00 0.000000000000000000e+00 3.459697265625000000e+03 4.006090164184570312e+00 4.000000000000000000e+00 4.000000000000000000e+00 8.399404144287109375e+01 1.475000000000000000e+01 5.175000000000000000e+01
3.100000000000000000e+01 5.762153846153848917e+02 2.983332824707031250e+02 6.657104492187500000e+00 0.000000000000000000e+00 0.000000000000000000e+00 3.445839599609375000e+03 3.952923774719238281e+00 2.000000000000000000e+00 3.000000000000000000e+00 6.970940399169921875e+01 1.575000000000000000e+01 5.175000000000000000e+01
2.000000000000000000e+00 5.533230769230768828e+02 2.904815673828125000e+02 6.289672851562500000e+00 0.000000000000000000e+00 0.000000000000000000e+00 3.399888427734375000e+03 3.899662971496582031e+00 3.000000000000000000e+00 1.000000000000000000e+00 1.218929901123046875e+02 1.875000000000000000e+01 5.175000000000000000e+01
4.000000000000000000e+00 5.783923076923076678e+02 3.050245056152343750e+02 5.952148437500000000e+00 0.000000000000000000e+00 2.352941185235977173e-01 3.326798095703125000e+03 3.842986822128295898e+00 3.000000000000000000e+00 1.000000000000000000e+00 1.514141693115234375e+02 2.025000000000000000e+01 5.175000000000000000e+01
1.800000000000000000e+01 6.473153846153843460e+02 3.046747436523437500e+02 5.269378662109375000e+00 0.000000000000000000e+00 0.000000000000000000e+00 3.180163818359375000e+03 3.791366577148437500e+00 5.000000000000000000e+00 1.000000000000000000e+00 1.447810363769531250e+02 2.575000000000000000e+01 5.175000000000000000e+01
2.200000000000000000e+01 6.574692307692312170e+02 3.516122436523437500e+02 5.380462646484375000e+00 0.000000000000000000e+00 1.117647051811218262e+00 3.255561767578125000e+03 3.845471858978271484e+00 5.000000000000000000e+00 3.000000000000000000e+00 1.114864273071289062e+02 2.975000000000000000e+01 5.175000000000000000e+01
5.000000000000000000e+00 6.335846153846157449e+02 3.224951477050781250e+02 4.821655273437500000e+00 0.000000000000000000e+00 1.058823585510253906e+00 3.178025390625000000e+03 3.853895187377929688e+00 5.000000000000000000e+00 1.000000000000000000e+00 1.166885604858398438e+02 3.175000000000000000e+01 5.175000000000000000e+01
8.000000000000000000e+00 6.304538461538461434e+02 3.182839965820312500e+02 4.665954589843750000e+00 0.000000000000000000e+00 7.647058963775634766e-01 3.156335937500000000e+03 3.834436416625976562e+00 5.000000000000000000e+00 1.000000000000000000e+00 1.410129089355468750e+02 3.225000000000000000e+01 5.175000000000000000e+01
1.800000000000000000e+01 1.500100000000000819e+03 5.870392456054687500e+02 1.053088378906250000e+01 0.000000000000000000e+00 0.000000000000000000e+00 4.123511718750000000e+03 4.058806419372558594e+00 1.000000000000000000e+01 1.000000000000000000e+00 5.589170837402343750e+01 -9.750000000000000000e+00 5.225000000000000000e+01
3.000000000000000000e+01 1.328723076923077087e+03 5.593217773437500000e+02 1.026748657226562500e+01 0.000000000000000000e+00 0.000000000000000000e+00 4.071599853515625000e+03 4.021115303039550781e+00 1.000000000000000000e+01 3.000000000000000000e+00 2.852739562988281250e+02 -9.250000000000000000e+00 5.225000000000000000e+01
2.800000000000000000e+01 1.094076923076922867e+03 5.323024291992187500e+02 1.016516113281250000e+01 0.000000000000000000e+00 0.000000000000000000e+00 4.044733642578125000e+03 4.029006004333496094e+00 5.000000000000000000e+00 3.000000000000000000e+00 1.303778991699218750e+02 -8.750000000000000000e+00 5.225000000000000000e+01
1.200000000000000000e+01 1.068038461538461661e+03 5.025683898925781250e+02 1.006286621093750000e+01 0.000000000000000000e+00 0.000000000000000000e+00 4.017867431640625000e+03 3.996278524398803711e+00 4.000000000000000000e+00 1.000000000000000000e+00 1.484083557128906250e+02 -8.250000000000000000e+00 5.225000000000000000e+01
4.400000000000000000e+01 1.140292307692307759e+03 4.699933166503906250e+02 9.960540771484375000e+00 0.000000000000000000e+00 0.000000000000000000e+00 3.991001220703125000e+03 3.972733259201049805e+00 4.000000000000000000e+00 3.000000000000000000e+00 1.590385284423828125e+02 -7.750000000000000000e+00 5.225000000000000000e+01
1.000000000000000000e+01 1.817484615384615381e+03 5.629441528320312500e+02 9.345855712890625000e+00 0.000000000000000000e+00 0.000000000000000000e+00 3.843739501953125000e+03 3.761771917343139648e+00 4.000000000000000000e+00 1.000000000000000000e+00 4.596254577636718750e+02 -3.750000000000000000e+00 5.225000000000000000e+01
3.700000000000000000e+01 1.187215384615384664e+03 5.526788330078125000e+02 9.356536865234375000e+00 0.000000000000000000e+00 0.000000000000000000e+00 3.848349365234375000e+03 3.757076978683471680e+00 4.000000000000000000e+00 3.000000000000000000e+00 3.738660888671875000e+02 -3.250000000000000000e+00 5.225000000000000000e+01
2.800000000000000000e+01 8.170076923076924231e+02 4.259910278320312500e+02 9.367187500000000000e+00 0.000000000000000000e+00 0.000000000000000000e+00 3.852959228515625000e+03 3.890422344207763672e+00 5.000000000000000000e+00 3.000000000000000000e+00 8.530889892578125000e+01 -2.750000000000000000e+00 5.225000000000000000e+01
4.500000000000000000e+01 8.493769230769230489e+02 4.247490234375000000e+02 8.458679199218750000e+00 0.000000000000000000e+00 0.000000000000000000e+00 3.692656738281250000e+03 3.987557649612426758e+00 2.000000000000000000e+00 4.000000000000000000e+00 3.309125518798828125e+01 5.750000000000000000e+00 5.225000000000000000e+01
1.300000000000000000e+01 8.217769230769234809e+02 4.154220581054687500e+02 8.274902343750000000e+00 0.000000000000000000e+00 0.000000000000000000e+00 3.663993652343750000e+03 3.991619825363159180e+00 8.000000000000000000e+00 1.000000000000000000e+00 7.524672985076904297e+00 6.250000000000000000e+00 5.225000000000000000e+01
6.000000000000000000e+00 7.776769230769228898e+02 3.997786254882812500e+02 7.649383544921875000e+00 0.000000000000000000e+00 0.000000000000000000e+00 3.584329589843750000e+03 3.919505357742309570e+00 2.000000000000000000e+00 1.000000000000000000e+00 8.853344726562500000e+01 8.250000000000000000e+00 5.225000000000000000e+01
3.700000000000000000e+01 5.736846153846151992e+02 3.022646484375000000e+02 7.127136230468750000e+00 0.000000000000000000e+00 0.000000000000000000e+00 3.543012451171875000e+03 4.014730930328369141e+00 4.000000000000000000e+00 3.000000000000000000e+00 6.255247497558593750e+01 1.275000000000000000e+01 5.225000000000000000e+01
8.000000000000000000e+00 5.602769230769231399e+02 2.991951904296875000e+02 7.117309570312500000e+00 0.000000000000000000e+00 0.000000000000000000e+00 3.541845458984375000e+03 4.022297382354736328e+00 4.000000000000000000e+00 1.000000000000000000e+00 3.909637069702148438e+01 1.325000000000000000e+01 5.225000000000000000e+01
4.500000000000000000e+01 5.549384615384615245e+02 2.934617004394531250e+02 7.058898925781250000e+00 0.000000000000000000e+00 0.000000000000000000e+00 3.529108642578125000e+03 4.004242420196533203e+00 4.000000000000000000e+00 4.000000000000000000e+00 5.552766418457031250e+01 1.425000000000000000e+01 5.225000000000000000e+01
4.900000000000000000e+01 5.725769230769229807e+02 2.924951171875000000e+02 7.029693603515625000e+00 0.000000000000000000e+00 0.000000000000000000e+00 3.522739990234375000e+03 3.984610319137573242e+00 4.000000000000000000e+00 4.000000000000000000e+00 5.053768157958984375e+01 1.475000000000000000e+01 5.225000000000000000e+01
1.400000000000000000e+01 5.800230769230770420e+02 3.084719238281250000e+02 6.987396240234375000e+00 0.000000000000000000e+00 2.941176593303680420e-01 3.514397216796875000e+03 3.956385374069213867e+00 3.000000000000000000e+00 1.000000000000000000e+00 1.132873992919921875e+02 1.525000000000000000e+01 5.225000000000000000e+01
4.300000000000000000e+01 5.634230769230769056e+02 3.163045654296875000e+02 6.932037353515625000e+00 0.000000000000000000e+00 0.000000000000000000e+00 3.504080078125000000e+03 3.940714120864868164e+00 3.000000000000000000e+00 3.000000000000000000e+00 7.836509704589843750e+01 1.575000000000000000e+01 5.225000000000000000e+01
1.100000000000000000e+01 5.578923076923077815e+02 3.022217102050781250e+02 6.876647949218750000e+00 0.000000000000000000e+00 2.941176593303680420e-01 3.493762939453125000e+03 3.923003435134887695e+00 3.000000000000000000e+00 1.000000000000000000e+00 9.973426818847656250e+01 1.625000000000000000e+01 5.225000000000000000e+01
3.100000000000000000e+01 5.080000000000000000e+02 2.771503295898437500e+02 5.927307128906250000e+00 0.000000000000000000e+00 0.000000000000000000e+00 3.307495849609375000e+03 3.854278564453125000e+00 2.000000000000000000e+00 3.000000000000000000e+00 1.043331375122070312e+02 2.125000000000000000e+01 5.225000000000000000e+01
3.200000000000000000e+01 5.310615384615385892e+02 2.743107299804687500e+02 5.796325683593750000e+00 0.000000000000000000e+00 0.000000000000000000e+00 3.280739013671875000e+03 3.832728147506713867e+00 5.000000000000000000e+00 3.000000000000000000e+00 1.785251159667968750e+02 2.175000000000000000e+01 5.225000000000000000e+01
8.000000000000000000e+00 5.173384615384613880e+02 2.758778076171875000e+02 5.665344238281250000e+00 0.000000000000000000e+00 0.000000000000000000e+00 3.253982421875000000e+03 3.831339120864868164e+00 3.000000000000000000e+00 1.000000000000000000e+00 1.480104980468750000e+02 2.225000000000000000e+01 5.225000000000000000e+01
3.800000000000000000e+01 5.363384615384618428e+02 2.850457153320312500e+02 5.466461181640625000e+00 0.000000000000000000e+00 0.000000000000000000e+00 3.211539794921875000e+03 3.828990459442138672e+00 3.000000000000000000e+00 3.000000000000000000e+00 1.467352294921875000e+02 2.325000000000000000e+01 5.225000000000000000e+01
1.600000000000000000e+01 6.019153846153849372e+02 3.024288635253906250e+02 5.263336181640625000e+00 0.000000000000000000e+00 6.470588445663452148e-01 3.173164794921875000e+03 3.783651113510131836e+00 1.500000000000000000e+01 1.000000000000000000e+00 1.570476989746093750e+02 2.525000000000000000e+01 5.225000000000000000e+01
5.100000000000000000e+01 6.664076923076922867e+02 3.774841613769531250e+02 5.298522949218750000e+00 0.000000000000000000e+00 8.823529481887817383e-01 3.210811035156250000e+03 3.775038003921508789e+00 5.000000000000000000e+00 4.000000000000000000e+00 1.231196365356445312e+02 2.875000000000000000e+01 5.225000000000000000e+01
3.400000000000000000e+01 6.512615384615384073e+02 3.397074584960937500e+02 4.950744628906250000e+00 0.000000000000000000e+00 8.823529481887817383e-01 3.159570800781250000e+03 3.816904306411743164e+00 5.000000000000000000e+00 3.000000000000000000e+00 1.261525497436523438e+02 3.075000000000000000e+01 5.225000000000000000e+01
1.700000000000000000e+01 1.119346153846154039e+03 4.965988769531250000e+02 9.995178222656250000e+00 0.000000000000000000e+00 0.000000000000000000e+00 3.974221191406250000e+03 4.005481243133544922e+00 5.000000000000000000e+00 1.000000000000000000e+00 5.782912063598632812e+01 -8.750000000000000000e+00 5.275000000000000000e+01
1.500000000000000000e+01 1.181253846153847007e+03 4.754757080078125000e+02 9.830291748046875000e+00 0.000000000000000000e+00 0.000000000000000000e+00 3.935826660156250000e+03 3.952982425689697266e+00 5.000000000000000000e+00 1.000000000000000000e+00 2.852669982910156250e+02 -8.250000000000000000e+00 5.275000000000000000e+01
2.700000000000000000e+01 9.801538461538459615e+02 4.473439636230468750e+02 9.665405273437500000e+00 0.000000000000000000e+00 0.000000000000000000e+00 3.897432128906250000e+03 3.947279214859008789e+00 5.000000000000000000e+00 3.000000000000000000e+00 1.198748168945312500e+02 -7.750000000000000000e+00 5.275000000000000000e+01
1.900000000000000000e+01 9.863923076923076678e+02 4.354861755371093750e+02 9.635986328125000000e+00 0.000000000000000000e+00 0.000000000000000000e+00 3.873874511718750000e+03 3.944438695907592773e+00 5.000000000000000000e+00 1.000000000000000000e+00 1.446565704345703125e+02 -7.250000000000000000e+00 5.275000000000000000e+01
3.600000000000000000e+01 1.116092307692307941e+03 4.349466552734375000e+02 9.742034912109375000e+00 0.000000000000000000e+00 0.000000000000000000e+00 3.865153808593750000e+03 3.979276180267333984e+00 4.000000000000000000e+00 3.000000000000000000e+00 7.976573944091796875e+01 -6.750000000000000000e+00 5.275000000000000000e+01
2.800000000000000000e+01 1.211838461538461615e+03 5.440444335937500000e+02 9.160827636718750000e+00 0.000000000000000000e+00 2.352941185235977173e-01 3.766403808593750000e+03 3.399543046951293945e+00 4.000000000000000000e+00 3.000000000000000000e+00 2.122481689453125000e+02 -3.250000000000000000e+00 5.275000000000000000e+01
1.300000000000000000e+01 8.700769230769237765e+02 4.215321350097656250e+02 8.568969726562500000e+00 0.000000000000000000e+00 0.000000000000000000e+00 3.668728271484375000e+03 3.930938243865966797e+00 2.000000000000000000e+00 1.000000000000000000e+00 2.851712226867675781e+00 6.250000000000000000e+00 5.275000000000000000e+01
2.800000000000000000e+01 7.864076923076925141e+02 4.189843750000000000e+02 8.396362304687500000e+00 0.000000000000000000e+00 0.000000000000000000e+00 3.641543457031250000e+03 3.913663387298583984e+00 2.000000000000000000e+00 3.000000000000000000e+00 1.267073726654052734e+01 6.750000000000000000e+00 5.275000000000000000e+01
6.000000000000000000e+00 7.518923076923076678e+02 3.686829223632812500e+02 7.728698730468750000e+00 0.000000000000000000e+00 0.000000000000000000e+00 3.586581787109375000e+03 3.915406465530395508e+00 5.000000000000000000e+00 1.000000000000000000e+00 5.096618652343750000e+01 8.750000000000000000e+00 5.275000000000000000e+01
6.200000000000000000e+01 6.861000000000001364e+02 3.701530761718750000e+02 7.471038818359375000e+00 0.000000000000000000e+00 0.000000000000000000e+00 3.574523681640625000e+03 3.906711816787719727e+00 2.000000000000000000e+00 4.000000000000000000e+00 4.051778411865234375e+01 9.750000000000000000e+00 5.275000000000000000e+01
6.200000000000000000e+01 6.869307692307688740e+02 3.570884094238281250e+02 7.399993896484375000e+00 0.000000000000000000e+00 0.000000000000000000e+00 3.567902587890625000e+03 3.893092155456542969e+00 2.000000000000000000e+00 4.000000000000000000e+00 8.298051452636718750e+01 1.025000000000000000e+01 5.275000000000000000e+01
5.800000000000000000e+01 5.895153846153846189e+02 2.842142639160156250e+02 7.182098388671875000e+00 0.000000000000000000e+00 2.941176593303680420e-01 3.479130126953125000e+03 3.944700479507446289e+00 5.000000000000000000e+00 4.000000000000000000e+00 5.734668731689453125e+01 1.475000000000000000e+01 5.275000000000000000e+01
5.400000000000000000e+01 5.920307692307688967e+02 3.114643554687500000e+02 7.094787597656250000e+00 0.000000000000000000e+00 2.352941185235977173e-01 3.476653808593750000e+03 3.911835670471191406e+00 3.000000000000000000e+00 4.000000000000000000e+00 4.359507751464843750e+01 1.575000000000000000e+01 5.275000000000000000e+01
5.700000000000000000e+01 5.790384615384614335e+02 3.045932922363281250e+02 7.033935546875000000e+00 0.000000000000000000e+00 0.000000000000000000e+00 3.482107177734375000e+03 3.888683080673217773e+00 3.000000000000000000e+00 4.000000000000000000e+00 6.899497985839843750e+01 1.625000000000000000e+01 5.275000000000000000e+01
1.300000000000000000e+01 5.712307692307691696e+02 3.016116638183593750e+02 6.973114013671875000e+00 0.000000000000000000e+00 2.941176593303680420e-01 3.487560546875000000e+03 3.867204189300537109e+00 2.000000000000000000e+00 1.000000000000000000e+00 7.112743377685546875e+01 1.675000000000000000e+01 5.275000000000000000e+01
9.000000000000000000e+00 5.670153846153846189e+02 2.884964904785156250e+02 6.452392578125000000e+00 0.000000000000000000e+00 0.000000000000000000e+00 3.391482666015625000e+03 3.842417001724243164e+00 5.000000000000000000e+00 1.000000000000000000e+00 1.245425643920898438e+02 1.975000000000000000e+01 5.275000000000000000e+01
1.600000000000000000e+01 5.499615384615383391e+02 2.880740356445312500e+02 6.319915771484375000e+00 0.000000000000000000e+00 0.000000000000000000e+00 3.363962158203125000e+03 3.838196992874145508e+00 5.000000000000000000e+00 1.000000000000000000e+00 1.000843276977539062e+02 2.025000000000000000e+01 5.275000000000000000e+01
4.200000000000000000e+01 5.321923076923078497e+02 2.491218414306640625e+02 5.863281250000000000e+00 0.000000000000000000e+00 0.000000000000000000e+00 3.277050537109375000e+03 3.807517290115356445e+00 3.000000000000000000e+00 3.000000000000000000e+00 1.162805023193359375e+02 2.175000000000000000e+01 5.275000000000000000e+01
1.100000000000000000e+01 5.539076923076922867e+02 2.816566772460937500e+02 5.565521240234375000e+00 0.000000000000000000e+00 0.000000000000000000e+00 3.221159423828125000e+03 3.757962226867675781e+00 5.000000000000000000e+00 1.000000000000000000e+00 1.349875183105468750e+02 2.275000000000000000e+01 5.275000000000000000e+01
7.200000000000000000e+01 5.568461538461536975e+02 2.979863891601562500e+02 5.327239990234375000e+00 0.000000000000000000e+00 0.000000000000000000e+00 3.174317382812500000e+03 3.768132448196411133e+00 3.000000000000000000e+00 4.000000000000000000e+00 1.645419616699218750e+02 2.375000000000000000e+01 5.275000000000000000e+01
6.600000000000000000e+01 5.938615384615387711e+02 3.074236145019531250e+02 5.151580810546875000e+00 0.000000000000000000e+00 5.882353186607360840e-01 3.143122558593750000e+03 3.759246587753295898e+00 5.000000000000000000e+00 4.000000000000000000e+00 1.878954620361328125e+02 2.475000000000000000e+01 5.275000000000000000e+01
6.900000000000000000e+01 6.388923076923078952e+02 3.347208862304687500e+02 5.046386718750000000e+00 0.000000000000000000e+00 5.294117927551269531e-01 3.140272949218750000e+03 3.750138998031616211e+00 5.000000000000000000e+00 4.000000000000000000e+00 1.542705688476562500e+02 2.675000000000000000e+01 5.275000000000000000e+01
3.100000000000000000e+01 6.398769230769232763e+02 3.480293579101562500e+02 5.048065185546875000e+00 0.000000000000000000e+00 1.058823585510253906e+00 3.145097656250000000e+03 3.756664752960205078e+00 5.000000000000000000e+00 3.000000000000000000e+00 1.451468811035156250e+02 2.725000000000000000e+01 5.275000000000000000e+01
5.800000000000000000e+01 6.483230769230766555e+02 3.598834838867187500e+02 4.935241699218750000e+00 0.000000000000000000e+00 0.000000000000000000e+00 3.134573486328125000e+03 3.729095220565795898e+00 5.000000000000000000e+00 4.000000000000000000e+00 1.446024322509765625e+02 2.925000000000000000e+01 5.275000000000000000e+01
2.500000000000000000e+01 6.433076923076922640e+02 3.509939270019531250e+02 4.784362792968750000e+00 0.000000000000000000e+00 1.117647051811218262e+00 3.110080810546875000e+03 3.744745969772338867e+00 8.000000000000000000e+00 3.000000000000000000e+00 1.408739624023437500e+02 3.025000000000000000e+01 5.275000000000000000e+01
9.000000000000000000e+00 6.507538461538460979e+02 3.450933532714843750e+02 4.636962890625000000e+00 0.000000000000000000e+00 1.176470637321472168e+00 3.086385009765625000e+03 3.747782707214355469e+00 5.000000000000000000e+00 1.000000000000000000e+00 1.419477081298828125e+02 3.075000000000000000e+01 5.275000000000000000e+01
3.000000000000000000e+01 6.545692307692307850e+02 3.437639465332031250e+02 4.489562988281250000e+00 0.000000000000000000e+00 7.647058963775634766e-01 3.062689208984375000e+03 3.741783857345581055e+00 5.000000000000000000e+00 3.000000000000000000e+00 1.477386779785156250e+02 3.125000000000000000e+01 5.275000000000000000e+01
1.300000000000000000e+01 6.140230769230767010e+02 3.312634277343750000e+02 4.054687500000000000e+00 0.000000000000000000e+00 5.294117927551269531e-01 3.001012939453125000e+03 3.734573602676391602e+00 5.000000000000000000e+00 1.000000000000000000e+00 2.083753051757812500e+02 3.275000000000000000e+01 5.275000000000000000e+01
1.900000000000000000e+01 1.129315384615385028e+03 5.049088134765625000e+02 9.957946777343750000e+00 0.000000000000000000e+00 0.000000000000000000e+00 3.926638183593750000e+03 3.978905916213989258e+00 5.000000000000000000e+00 1.000000000000000000e+00 3.108976936340332031e+01 -8.750000000000000000e+00 5.325000000000000000e+01
1.700000000000000000e+01 1.006730769230769283e+03 4.743084716796875000e+02 9.708465576171875000e+00 0.000000000000000000e+00 2.941176593303680420e-01 3.871762695312500000e+03 3.967895984649658203e+00 5.000000000000000000e+00 1.000000000000000000e+00 7.254427337646484375e+01 -8.250000000000000000e+00 5.325000000000000000e+01
2.000000000000000000e+01 9.126076923076926732e+02 4.387093200683593750e+02 9.459014892578125000e+00 0.000000000000000000e+00 2.941176593303680420e-01 3.816887207031250000e+03 3.967495679855346680e+00 5.000000000000000000e+00 3.000000000000000000e+00 4.969693374633789062e+01 -7.750000000000000000e+00 5.325000000000000000e+01
4.900000000000000000e+01 8.451769230769234582e+02 4.346825561523437500e+02 9.384613037109375000e+00 0.000000000000000000e+00 5.882352963089942932e-02 3.784670654296875000e+03 3.993619441986083984e+00 5.000000000000000000e+00 4.000000000000000000e+00 8.445209503173828125e+01 -7.250000000000000000e+00 5.325000000000000000e+01
2.400000000000000000e+01 8.535692307692308987e+02 4.214511718750000000e+02 9.485229492187500000e+00 0.000000000000000000e+00 6.470588445663452148e-01 3.775113281250000000e+03 4.000135898590087891e+00 5.000000000000000000e+00 3.000000000000000000e+00 8.253556823730468750e+01 -6.750000000000000000e+00 5.325000000000000000e+01
2.600000000000000000e+01 8.732461538461539021e+02 3.737533569335937500e+02 8.954223632812500000e+00 0.000000000000000000e+00 0.000000000000000000e+00 3.678478759765625000e+03 3.917405605316162109e+00 1.100000000000000000e+01 3.000000000000000000e+00 4.889411544799804688e+01 -2.750000000000000000e+00 5.325000000000000000e+01
4.100000000000000000e+01 9.300307692307690104e+02 3.879311523437500000e+02 8.868988037109375000e+00 0.000000000000000000e+00 0.000000000000000000e+00 3.676248535156250000e+03 3.892866134643554688e+00 1.100000000000000000e+01 3.000000000000000000e+00 1.004256134033203125e+02 -2.250000000000000000e+00 5.325000000000000000e+01
1.500000000000000000e+01 7.936076923076925596e+02 4.088987426757812500e+02 8.455200195312500000e+00 0.000000000000000000e+00 0.000000000000000000e+00 3.615568847656250000e+03 3.895603656768798828e+00 1.500000000000000000e+01 1.000000000000000000e+00 2.032770633697509766e+00 7.750000000000000000e+00 5.325000000000000000e+01
1.300000000000000000e+01 7.861769230769230035e+02 3.971711425781250000e+02 8.214721679687500000e+00 0.000000000000000000e+00 0.000000000000000000e+00 3.605195312500000000e+03 3.908948421478271484e+00 5.000000000000000000e+00 1.000000000000000000e+00 6.108917713165283203e+00 8.250000000000000000e+00 5.325000000000000000e+01
2.200000000000000000e+01 7.748384615384612744e+02 3.839235839843750000e+02 7.974243164062500000e+00 0.000000000000000000e+00 0.000000000000000000e+00 3.594821777343750000e+03 3.902718782424926758e+00 8.000000000000000000e+00 3.000000000000000000e+00 3.214426040649414062e+01 8.750000000000000000e+00 5.325000000000000000e+01
6.000000000000000000e+00 7.683384615384616154e+02 3.858094177246093750e+02 7.733764648437500000e+00 0.000000000000000000e+00 0.000000000000000000e+00 3.584448486328125000e+03 3.884891510009765625e+00 5.000000000000000000e+00 1.000000000000000000e+00 3.198430252075195312e+01 9.250000000000000000e+00 5.325000000000000000e+01
4.500000000000000000e+01 7.494384615384611834e+02 3.877566528320312500e+02 7.535217285156250000e+00 0.000000000000000000e+00 0.000000000000000000e+00 3.569017822265625000e+03 3.862834453582763672e+00 2.000000000000000000e+00 4.000000000000000000e+00 3.415734481811523438e+01 1.025000000000000000e+01 5.325000000000000000e+01
6.700000000000000000e+01 6.326307692307691468e+02 2.918916625976562500e+02 7.144744873046875000e+00 0.000000000000000000e+00 0.000000000000000000e+00 3.521306152343750000e+03 3.886592626571655273e+00 4.000000000000000000e+00 4.000000000000000000e+00 8.588518524169921875e+01 1.325000000000000000e+01 5.325000000000000000e+01
1.200000000000000000e+01 6.133076923076926050e+02 2.892361145019531250e+02 7.247985839843750000e+00 0.000000000000000000e+00 2.941176593303680420e-01 3.439159423828125000e+03 3.900362968444824219e+00 5.000000000000000000e+00 1.000000000000000000e+00 3.468247985839843750e+01 1.425000000000000000e+01 5.325000000000000000e+01
6.100000000000000000e+01 6.441000000000001364e+02 3.297604675292968750e+02 7.218139648437500000e+00 0.000000000000000000e+00 0.000000000000000000e+00 3.419158935546875000e+03 3.832928180694580078e+00 5.000000000000000000e+00 4.000000000000000000e+00 9.375706481933593750e+01 1.575000000000000000e+01 5.325000000000000000e+01
1.300000000000000000e+01 6.455692307692305576e+02 3.065604553222656250e+02 7.146606445312500000e+00 0.000000000000000000e+00 0.000000000000000000e+00 3.446898681640625000e+03 3.794337749481201172e+00 3.000000000000000000e+00 1.000000000000000000e+00 1.419586029052734375e+02 1.625000000000000000e+01 5.325000000000000000e+01
5.000000000000000000e+01 6.218538461538461206e+02 2.959784240722656250e+02 7.075103759765625000e+00 0.000000000000000000e+00 0.000000000000000000e+00 3.474638427734375000e+03 3.788025379180908203e+00 3.000000000000000000e+00 4.000000000000000000e+00 8.940802001953125000e+01 1.675000000000000000e+01 5.325000000000000000e+01
4.700000000000000000e+01 5.888769230769229353e+02 3.017730102539062500e+02 6.580505371093750000e+00 0.000000000000000000e+00 2.941176593303680420e-01 3.388679687500000000e+03 3.792589187622070312e+00 5.000000000000000000e+00 4.000000000000000000e+00 1.498281555175781250e+02 1.975000000000000000e+01 5.325000000000000000e+01
7.000000000000000000e+01 6.119846153846156085e+02 2.935842895507812500e+02 6.270233154296875000e+00 0.000000000000000000e+00 0.000000000000000000e+00 3.327090576171875000e+03 3.737046480178833008e+00 2.000000000000000000e+00 4.000000000000000000e+00 1.529029388427734375e+02 2.075000000000000000e+01 5.325000000000000000e+01
1.000000000000000000e+01 6.037692307692309441e+02 2.625046997070312500e+02 6.082702636718750000e+00 0.000000000000000000e+00 0.000000000000000000e+00 3.294816162109375000e+03 3.747459888458251953e+00 2.000000000000000000e+00 1.000000000000000000e+00 1.128262786865234375e+02 2.125000000000000000e+01 5.325000000000000000e+01
5.400000000000000000e+01 5.929461538461537202e+02 2.434438171386718750e+02 5.895202636718750000e+00 0.000000000000000000e+00 0.000000000000000000e+00 3.262541992187500000e+03 3.730072736740112305e+00 2.000000000000000000e+00 4.000000000000000000e+00 1.064559097290039062e+02 2.175000000000000000e+01 5.325000000000000000e+01
6.600000000000000000e+01 5.833230769230772239e+02 3.004593200683593750e+02 5.384063720703125000e+00 0.000000000000000000e+00 0.000000000000000000e+00 3.172735839843750000e+03 3.685292243957519531e+00 5.000000000000000000e+00 4.000000000000000000e+00 1.549164886474609375e+02 2.325000000000000000e+01 5.325000000000000000e+01
6.000000000000000000e+01 6.231923076923072813e+02 3.339983215332031250e+02 4.911346435546875000e+00 0.000000000000000000e+00 0.000000000000000000e+00 3.096161621093750000e+03 3.700659513473510742e+00 5.000000000000000000e+00 4.000000000000000000e+00 1.392625122070312500e+02 2.525000000000000000e+01 5.325000000000000000e+01
1.000000000000000000e+01 6.609692307692311033e+02 3.462694091796875000e+02 4.672210693359375000e+00 0.000000000000000000e+00 6.470588445663452148e-01 3.077266357421875000e+03 3.690112829208374023e+00 5.000000000000000000e+00 1.000000000000000000e+00 1.590470275878906250e+02 2.825000000000000000e+01 5.325000000000000000e+01
5.100000000000000000e+01 6.640230769230771557e+02 3.464854736328125000e+02 4.617004394531250000e+00 0.000000000000000000e+00 5.294117927551269531e-01 3.067396728515625000e+03 3.677327871322631836e+00 5.000000000000000000e+00 4.000000000000000000e+00 1.609231262207031250e+02 2.875000000000000000e+01 5.325000000000000000e+01
3.800000000000000000e+01 6.338692307692302847e+02 3.482651672363281250e+02 3.767333984375000000e+00 0.000000000000000000e+00 1.058823585510253906e+00 2.934540527343750000e+03 3.665247917175292969e+00 5.000000000000000000e+00 3.000000000000000000e+00 1.630017395019531250e+02 3.275000000000000000e+01 5.325000000000000000e+01
4.500000000000000000e+01 1.305369230769230626e+03 5.520584716796875000e+02 1.025476074218750000e+01 0.000000000000000000e+00 0.000000000000000000e+00 3.950411865234375000e+03 3.887936592102050781e+00 6.000000000000000000e+00 4.000000000000000000e+00 2.634228134155273438e+01 -9.250000000000000000e+00 5.375000000000000000e+01
3.100000000000000000e+01 1.187923076923076678e+03 5.522806396484375000e+02 9.920715332031250000e+00 0.000000000000000000e+00 0.000000000000000000e+00 3.879055175781250000e+03 3.905271530151367188e+00 8.000000000000000000e+00 3.000000000000000000e+00 8.864769744873046875e+01 -8.750000000000000000e+00 5.375000000000000000e+01
1.600000000000000000e+01 1.081392307692307895e+03 5.294121093750000000e+02 9.586669921875000000e+00 0.000000000000000000e+00 0.000000000000000000e+00 3.807698730468750000e+03 3.904171943664550781e+00 5.000000000000000000e+00 1.000000000000000000e+00 7.935924530029296875e+01 -8.250000000000000000e+00 5.375000000000000000e+01
2.800000000000000000e+01 1.056684615384615427e+03 4.861311950683593750e+02 9.252624511718750000e+00 0.000000000000000000e+00 5.882352963089942932e-02 3.736342041015625000e+03 3.915934324264526367e+00 8.000000000000000000e+00 3.000000000000000000e+00 7.008406829833984375e+01 -7.750000000000000000e+00 5.375000000000000000e+01
3.300000000000000000e+01 9.484769230769229580e+02 4.644215393066406250e+02 9.133209228515625000e+00 0.000000000000000000e+00 0.000000000000000000e+00 3.695466796875000000e+03 3.943793058395385742e+00 5.000000000000000000e+00 3.000000000000000000e+00 1.112119064331054688e+02 -7.250000000000000000e+00 5.375000000000000000e+01
1.500000000000000000e+01 9.061230769230771784e+02 4.419143981933593750e+02 9.228424072265625000e+00 0.000000000000000000e+00 0.000000000000000000e+00 3.685072998046875000e+03 3.983710050582885742e+00 4.000000000000000000e+00 1.000000000000000000e+00 6.125280761718750000e+01 -6.750000000000000000e+00 5.375000000000000000e+01
4.500000000000000000e+01 1.315246153846153447e+03 4.754005126953125000e+02 8.632263183593750000e+00 0.000000000000000000e+00 0.000000000000000000e+00 3.581673095703125000e+03 2.752565145492553711e+00 6.000000000000000000e+00 4.000000000000000000e+00 2.822624511718750000e+02 -2.250000000000000000e+00 5.375000000000000000e+01
5.700000000000000000e+01 6.761769230769233445e+02 3.273171081542968750e+02 7.392303466796875000e+00 0.000000000000000000e+00 0.000000000000000000e+00 3.543558349609375000e+03 3.872887849807739258e+00 5.000000000000000000e+00 4.000000000000000000e+00 3.487480926513671875e+01 1.175000000000000000e+01 5.375000000000000000e+01
2.000000000000000000e+00 6.597999999999997272e+02 3.630587768554687500e+02 7.423736572265625000e+00 0.000000000000000000e+00 0.000000000000000000e+00 3.311638183593750000e+03 3.829682588577270508e+00 5.000000000000000000e+00 1.000000000000000000e+00 4.215376663208007812e+01 1.525000000000000000e+01 5.375000000000000000e+01
3.200000000000000000e+01 7.108538461538460069e+02 3.225245056152343750e+02 7.259277343750000000e+00 0.000000000000000000e+00 0.000000000000000000e+00 3.411690429687500000e+03 3.729543924331665039e+00 3.000000000000000000e+00 3.000000000000000000e+00 1.276448516845703125e+02 1.625000000000000000e+01 5.375000000000000000e+01
1.200000000000000000e+01 6.699461538461538339e+02 3.124024047851562500e+02 7.134338378906250000e+00 0.000000000000000000e+00 5.882352963089942932e-02 3.470011962890625000e+03 3.688004732131958008e+00 3.000000000000000000e+00 1.000000000000000000e+00 1.454570617675781250e+02 1.725000000000000000e+01 5.375000000000000000e+01
3.000000000000000000e+01 6.481000000000002501e+02 3.392144470214843750e+02 7.104766845703125000e+00 0.000000000000000000e+00 0.000000000000000000e+00 3.464397460937500000e+03 3.694859266281127930e+00 3.000000000000000000e+00 3.000000000000000000e+00 1.343954620361328125e+02 1.775000000000000000e+01 5.375000000000000000e+01
6.100000000000000000e+01 6.042461538461540158e+02 3.366767578125000000e+02 7.075195312500000000e+00 0.000000000000000000e+00 0.000000000000000000e+00 3.458782714843750000e+03 3.729347467422485352e+00 3.000000000000000000e+00 4.000000000000000000e+00 1.153340759277343750e+02 1.825000000000000000e+01 5.375000000000000000e+01
1.200000000000000000e+01 5.881923076923075087e+02 3.274455261230468750e+02 7.045654296875000000e+00 0.000000000000000000e+00 8.823529481887817383e-01 3.453168212890625000e+03 3.765263319015502930e+00 5.000000000000000000e+00 1.000000000000000000e+00 6.453976440429687500e+01 1.875000000000000000e+01 5.375000000000000000e+01
1.400000000000000000e+01 6.399153846153845961e+02 2.995876464843750000e+02 5.710845947265625000e+00 0.000000000000000000e+00 0.000000000000000000e+00 3.212938476562500000e+03 3.663280010223388672e+00 3.000000000000000000e+00 1.000000000000000000e+00 1.564359283447265625e+02 2.225000000000000000e+01 5.375000000000000000e+01
1.100000000000000000e+01 6.065384615384614335e+02 3.010580139160156250e+02 5.509033203125000000e+00 0.000000000000000000e+00 2.352941185235977173e-01 3.179505126953125000e+03 3.660172224044799805e+00 5.000000000000000000e+00 1.000000000000000000e+00 1.282435913085937500e+02 2.275000000000000000e+01 5.375000000000000000e+01
5.200000000000000000e+01 6.636692307692306940e+02 3.628575744628906250e+02 4.596099853515625000e+00 0.000000000000000000e+00 5.294117927551269531e-01 3.037765625000000000e+03 3.657273530960083008e+00 5.000000000000000000e+00 4.000000000000000000e+00 1.782870788574218750e+02 2.575000000000000000e+01 5.375000000000000000e+01
6.300000000000000000e+01 6.586461538461542204e+02 3.625422973632812500e+02 4.441619873046875000e+00 0.000000000000000000e+00 2.352941185235977173e-01 3.019013427734375000e+03 3.657915830612182617e+00 5.000000000000000000e+00 4.000000000000000000e+00 2.120632781982421875e+02 2.675000000000000000e+01 5.375000000000000000e+01
5.900000000000000000e+01 6.611846153846150855e+02 3.567310485839843750e+02 4.247314453125000000e+00 0.000000000000000000e+00 5.882353186607360840e-01 2.991790283203125000e+03 3.645540237426757812e+00 5.000000000000000000e+00 4.000000000000000000e+00 1.765756225585937500e+02 2.875000000000000000e+01 5.375000000000000000e+01
3.700000000000000000e+01 6.520384615384614335e+02 3.496652526855468750e+02 4.188323974609375000e+00 0.000000000000000000e+00 0.000000000000000000e+00 2.980480957031250000e+03 3.633775472640991211e+00 5.000000000000000000e+00 3.000000000000000000e+00 1.671456451416015625e+02 2.925000000000000000e+01 5.375000000000000000e+01
5.400000000000000000e+01 6.462000000000000455e+02 3.468914489746093750e+02 4.129333496093750000e+00 0.000000000000000000e+00 5.294117927551269531e-01 2.969171630859375000e+03 3.623683929443359375e+00 5.000000000000000000e+00 4.000000000000000000e+00 1.733882751464843750e+02 2.975000000000000000e+01 5.375000000000000000e+01
1.500000000000000000e+01 6.295000000000001137e+02 3.536636657714843750e+02 3.916168212890625000e+00 0.000000000000000000e+00 8.823529481887817383e-01 2.932611816406250000e+03 3.608178377151489258e+00 5.000000000000000000e+00 1.000000000000000000e+00 1.623833618164062500e+02 3.075000000000000000e+01 5.375000000000000000e+01
4.800000000000000000e+01 6.398000000000002956e+02 3.532390441894531250e+02 3.793701171875000000e+00 0.000000000000000000e+00 4.705882370471954346e-01 2.912008300781250000e+03 3.610376596450805664e+00 5.000000000000000000e+00 4.000000000000000000e+00 1.781728363037109375e+02 3.125000000000000000e+01 5.375000000000000000e+01
1.300000000000000000e+01 6.547538461538460979e+02 3.526211547851562500e+02 3.671234130859375000e+00 0.000000000000000000e+00 1.000000000000000000e+00 2.891405029296875000e+03 3.612360954284667969e+00 5.000000000000000000e+00 1.000000000000000000e+00 1.524963531494140625e+02 3.175000000000000000e+01 5.375000000000000000e+01
6.700000000000000000e+01 6.425538461538460524e+02 3.522259216308593750e+02 3.479949951171875000e+00 0.000000000000000000e+00 5.294117927551269531e-01 2.868068359375000000e+03 3.606814146041870117e+00 5.000000000000000000e+00 4.000000000000000000e+00 1.946869812011718750e+02 3.275000000000000000e+01 5.375000000000000000e+01
4.900000000000000000e+01 1.404938461538461979e+03 5.418453369140625000e+02 9.464843750000000000e+00 0.000000000000000000e+00 0.000000000000000000e+00 3.743634521484375000e+03 3.781735181808471680e+00 8.000000000000000000e+00 4.000000000000000000e+00 1.117234802246093750e+02 -8.250000000000000000e+00 5.425000000000000000e+01
2.400000000000000000e+01 1.482699999999999591e+03 5.054436645507812500e+02 9.046203613281250000e+00 0.000000000000000000e+00 0.000000000000000000e+00 3.655797119140625000e+03 3.756015300750732422e+00 8.000000000000000000e+00 3.000000000000000000e+00 1.935438232421875000e+02 -7.750000000000000000e+00 5.425000000000000000e+01
4.200000000000000000e+01 1.144561538461538703e+03 4.832436523437500000e+02 8.881805419921875000e+00 0.000000000000000000e+00 2.941176593303680420e-01 3.606262939453125000e+03 3.787927865982055664e+00 8.000000000000000000e+00 3.000000000000000000e+00 1.377482147216796875e+02 -7.250000000000000000e+00 5.425000000000000000e+01
2.500000000000000000e+01 9.848615384615385437e+02 4.714107055664062500e+02 8.971618652343750000e+00 0.000000000000000000e+00 0.000000000000000000e+00 3.595032470703125000e+03 3.825759649276733398e+00 4.000000000000000000e+00 3.000000000000000000e+00 1.488451232910156250e+02 -6.750000000000000000e+00 5.425000000000000000e+01
3.500000000000000000e+01 1.875153846153847098e+03 5.291780395507812500e+02 8.596191406250000000e+00 0.000000000000000000e+00 0.000000000000000000e+00 3.498208984375000000e+03 3.683986663818359375e+00 1.100000000000000000e+01 3.000000000000000000e+00 5.423452758789062500e+01 -2.750000000000000000e+00 5.425000000000000000e+01
1.800000000000000000e+01 1.779384615384614563e+03 5.004105529785156250e+02 8.395568847656250000e+00 0.000000000000000000e+00 0.000000000000000000e+00 3.487097900390625000e+03 3.576379776000976562e+00 6.000000000000000000e+00 1.000000000000000000e+00 4.248168640136718750e+02 -2.250000000000000000e+00 5.425000000000000000e+01
2.400000000000000000e+01 1.115523076923077269e+03 4.171396484375000000e+02 8.336120605468750000e+00 0.000000000000000000e+00 0.000000000000000000e+00 3.491070800781250000e+03 3.624395132064819336e+00 8.000000000000000000e+00 3.000000000000000000e+00 2.131101379394531250e+02 -1.750000000000000000e+00 5.425000000000000000e+01
2.900000000000000000e+01 8.523307692307694197e+02 3.473954467773437500e+02 8.700256347656250000e+00 0.000000000000000000e+00 0.000000000000000000e+00 3.540295654296875000e+03 3.709341287612915039e+00 8.000000000000000000e+00 3.000000000000000000e+00 1.714871368408203125e+02 -1.250000000000000000e+00 5.425000000000000000e+01
9.000000000000000000e+00 8.440461538461538566e+02 4.188523864746093750e+02 8.070953369140625000e+00 0.000000000000000000e+00 0.000000000000000000e+00 3.591529541015625000e+03 3.810800790786743164e+00 2.000000000000000000e+00 1.000000000000000000e+00 4.779125213623046875e+00 9.250000000000000000e+00 5.425000000000000000e+01
1.000000000000000000e+01 8.127076923076926960e+02 4.172742309570312500e+02 7.900909423828125000e+00 0.000000000000000000e+00 0.000000000000000000e+00 3.580012939453125000e+03 3.806523799896240234e+00 2.000000000000000000e+00 1.000000000000000000e+00 8.244142532348632812e+00 9.750000000000000000e+00 5.425000000000000000e+01
5.000000000000000000e+01 7.166384615384613426e+02 3.405837402343750000e+02 7.279052734375000000e+00 0.000000000000000000e+00 0.000000000000000000e+00 3.448794433593750000e+03 3.694028139114379883e+00 3.000000000000000000e+00 4.000000000000000000e+00 5.451557540893554688e+01 1.675000000000000000e+01 5.425000000000000000e+01
7.000000000000000000e+00 7.050923076923079407e+02 3.338743286132812500e+02 7.246612548828125000e+00 0.000000000000000000e+00 6.470588445663452148e-01 3.464796142578125000e+03 3.653674602508544922e+00 3.000000000000000000e+00 1.000000000000000000e+00 9.517235565185546875e+01 1.725000000000000000e+01 5.425000000000000000e+01
5.100000000000000000e+01 6.734153846153848235e+02 3.456265869140625000e+02 7.222045898437500000e+00 0.000000000000000000e+00 0.000000000000000000e+00 3.459259033203125000e+03 3.643289566040039062e+00 3.000000000000000000e+00 4.000000000000000000e+00 2.210347442626953125e+02 1.825000000000000000e+01 5.425000000000000000e+01
1.500000000000000000e+01 6.526076923076924459e+02 3.420073547363281250e+02 4.650177001953125000e+00 0.000000000000000000e+00 2.352941185235977173e-01 3.027066894531250000e+03 3.615926504135131836e+00 5.000000000000000000e+00 1.000000000000000000e+00 1.592752380371093750e+02 2.475000000000000000e+01 5.425000000000000000e+01
4.600000000000000000e+01 6.748692307692310806e+02 3.703934020996093750e+02 4.353973388671875000e+00 0.000000000000000000e+00 0.000000000000000000e+00 2.987645019531250000e+03 3.611026525497436523e+00 5.000000000000000000e+00 4.000000000000000000e+00 2.106660156250000000e+02 2.575000000000000000e+01 5.425000000000000000e+01
4.700000000000000000e+01 6.750846153846154039e+02 3.741574707031250000e+02 4.205841064453125000e+00 0.000000000000000000e+00 0.000000000000000000e+00 2.967934326171875000e+03 3.601129293441772461e+00 5.000000000000000000e+00 4.000000000000000000e+00 1.980012817382812500e+02 2.625000000000000000e+01 5.425000000000000000e+01
5.400000000000000000e+01 6.649000000000000909e+02 3.845429687500000000e+02 4.072631835937500000e+00 0.000000000000000000e+00 3.529411852359771729e-01 2.948833251953125000e+03 3.608011960983276367e+00 5.000000000000000000e+00 4.000000000000000000e+00 1.886023712158203125e+02 2.725000000000000000e+01 5.425000000000000000e+01
2.700000000000000000e+01 6.699923076923076906e+02 3.791590576171875000e+02 3.940368652343750000e+00 0.000000000000000000e+00 5.294117927551269531e-01 2.928932861328125000e+03 3.617522954940795898e+00 5.000000000000000000e+00 3.000000000000000000e+00 1.696168060302734375e+02 2.825000000000000000e+01 5.425000000000000000e+01
5.700000000000000000e+01 6.720923076923075996e+02 3.600657348632812500e+02 3.814880371093750000e+00 0.000000000000000000e+00 7.058823704719543457e-01 2.903434570312500000e+03 3.603086233139038086e+00 5.000000000000000000e+00 4.000000000000000000e+00 1.895676116943359375e+02 2.925000000000000000e+01 5.425000000000000000e+01
4.000000000000000000e+00 6.286846153846155403e+02 3.588727111816406250e+02 3.445770263671875000e+00 0.000000000000000000e+00 1.647058844566345215e+00 2.836667968750000000e+03 3.561713933944702148e+00 5.000000000000000000e+00 1.000000000000000000e+00 1.975856323242187500e+02 3.125000000000000000e+01 5.425000000000000000e+01
5.300000000000000000e+01 6.613461538461536975e+02 3.666033325195312500e+02 3.335754394531250000e+00 0.000000000000000000e+00 5.882353186607360840e-01 2.817610595703125000e+03 3.563978433609008789e+00 5.000000000000000000e+00 4.000000000000000000e+00 1.905593872070312500e+02 3.175000000000000000e+01 5.425000000000000000e+01
1.400000000000000000e+01 6.724230769230766782e+02 3.613224792480468750e+02 3.192565917968750000e+00 0.000000000000000000e+00 1.058823585510253906e+00 2.801596191406250000e+03 3.562600612640380859e+00 5.000000000000000000e+00 1.000000000000000000e+00 2.036539764404296875e+02 3.275000000000000000e+01 5.425000000000000000e+01
4.000000000000000000e+01 1.497192307692307622e+03 5.133814086914062500e+02 9.103118896484375000e+00 0.000000000000000000e+00 0.000000000000000000e+00 3.624030517578125000e+03 3.696174621582031250e+00 8.000000000000000000e+00 3.000000000000000000e+00 1.382286376953125000e+02 -7.750000000000000000e+00 5.475000000000000000e+01
9.000000000000000000e+00 1.406023076923077042e+03 5.145739746093750000e+02 8.898742675781250000e+00 0.000000000000000000e+00 0.000000000000000000e+00 3.567285644531250000e+03 3.714941501617431641e+00 4.000000000000000000e+00 1.000000000000000000e+00 1.627336730957031250e+02 -7.250000000000000000e+00 5.475000000000000000e+01
2.300000000000000000e+01 1.134292307692307531e+03 5.071299133300781250e+02 8.863250732421875000e+00 0.000000000000000000e+00 0.000000000000000000e+00 3.537861572265625000e+03 3.745534658432006836e+00 4.000000000000000000e+00 3.000000000000000000e+00 2.638041076660156250e+02 -6.750000000000000000e+00 5.475000000000000000e+01
3.400000000000000000e+01 9.561230769230770647e+02 4.634954223632812500e+02 8.827758789062500000e+00 0.000000000000000000e+00 0.000000000000000000e+00 3.508437500000000000e+03 3.370313882827758789e+00 1.100000000000000000e+01 3.000000000000000000e+00 4.978313064575195312e+01 -6.250000000000000000e+00 5.475000000000000000e+01
1.400000000000000000e+01 8.062615384615385210e+02 3.968814086914062500e+02 8.439727783203125000e+00 0.000000000000000000e+00 0.000000000000000000e+00 3.459102294921875000e+03 3.682224512100219727e+00 1.100000000000000000e+01 1.000000000000000000e+00 2.331972503662109375e+02 -1.750000000000000000e+00 5.475000000000000000e+01
5.100000000000000000e+01 6.865615384615381345e+02 3.636099243164062500e+02 4.255920410156250000e+00 0.000000000000000000e+00 5.882352963089942932e-02 2.947291503906250000e+03 3.574336051940917969e+00 5.000000000000000000e+00 4.000000000000000000e+00 2.385556335449218750e+02 2.575000000000000000e+01 5.475000000000000000e+01
6.000000000000000000e+01 6.567153846153846644e+02 3.764593505859375000e+02 4.093658447265625000e+00 0.000000000000000000e+00 5.882353186607360840e-01 2.929077880859375000e+03 3.583071470260620117e+00 5.000000000000000000e+00 4.000000000000000000e+00 1.418205871582031250e+02 2.625000000000000000e+01 5.475000000000000000e+01
4.500000000000000000e+01 6.470461538461536293e+02 3.798005981445312500e+02 3.949523925781250000e+00 0.000000000000000000e+00 5.882352963089942932e-02 2.911906005859375000e+03 3.580635070800781250e+00 5.000000000000000000e+00 4.000000000000000000e+00 1.854293060302734375e+02 2.725000000000000000e+01 5.475000000000000000e+01
5.400000000000000000e+01 6.825384615384616609e+02 3.804526367187500000e+02 3.806365966796875000e+00 0.000000000000000000e+00 0.000000000000000000e+00 2.893498291015625000e+03 3.579331398010253906e+00 5.000000000000000000e+00 4.000000000000000000e+00 1.738347320556640625e+02 2.825000000000000000e+01 5.475000000000000000e+01
9.000000000000000000e+00 6.987461538461537884e+02 3.795850524902343750e+02 3.738159179687500000e+00 0.000000000000000000e+00 2.941176593303680420e-01 2.879968994140625000e+03 3.578430652618408203e+00 5.000000000000000000e+00 1.000000000000000000e+00 1.633684844970703125e+02 2.875000000000000000e+01 5.475000000000000000e+01
1.000000000000000000e+01 6.937692307692306031e+02 3.766817321777343750e+02 3.669982910156250000e+00 0.000000000000000000e+00 5.882353186607360840e-01 2.866439941406250000e+03 3.571383237838745117e+00 5.000000000000000000e+00 1.000000000000000000e+00 1.488314056396484375e+02 2.925000000000000000e+01 5.475000000000000000e+01
6.300000000000000000e+01 6.720153846153846189e+02 3.651177673339843750e+02 3.513153076171875000e+00 0.000000000000000000e+00 2.352941185235977173e-01 2.835896728515625000e+03 3.540621042251586914e+00 5.000000000000000000e+00 4.000000000000000000e+00 1.798642272949218750e+02 3.025000000000000000e+01 5.475000000000000000e+01
6.600000000000000000e+01 6.545000000000001137e+02 3.649504394531250000e+02 3.404144287109375000e+00 0.000000000000000000e+00 7.647058963775634766e-01 2.815398437500000000e+03 3.531507015228271484e+00 5.000000000000000000e+00 4.000000000000000000e+00 1.775166168212890625e+02 3.075000000000000000e+01 5.475000000000000000e+01
2.400000000000000000e+01 6.491769230769230035e+02 3.764528198242187500e+02 3.295104980468750000e+00 0.000000000000000000e+00 1.588235259056091309e+00 2.794899902343750000e+03 3.528286695480346680e+00 5.000000000000000000e+00 3.000000000000000000e+00 1.725399780273437500e+02 3.125000000000000000e+01 5.475000000000000000e+01
3.100000000000000000e+01 6.908923076923078952e+02 3.970405273437500000e+02 3.100311279296875000e+00 0.000000000000000000e+00 2.941176593303680420e-01 2.762466552734375000e+03 3.525275945663452148e+00 5.000000000000000000e+00 3.000000000000000000e+00 1.806007995605468750e+02 3.225000000000000000e+01 5.475000000000000000e+01
6.300000000000000000e+01 7.023538461538463480e+02 3.879289550781250000e+02 3.022308349609375000e+00 0.000000000000000000e+00 8.235294222831726074e-01 2.753385986328125000e+03 3.516386032104492188e+00 5.000000000000000000e+00 4.000000000000000000e+00 2.113416595458984375e+02 3.275000000000000000e+01 5.475000000000000000e+01
6.100000000000000000e+01 2.074053846153845370e+03 4.954952697753906250e+02 8.241821289062500000e+00 0.000000000000000000e+00 0.000000000000000000e+00 3.341447998046875000e+03 3.552855253219604492e+00 1.500000000000000000e+01 4.000000000000000000e+00 3.598972473144531250e+02 -4.250000000000000000e+00 5.525000000000000000e+01
4.200000000000000000e+01 1.589030769230768783e+03 5.290864257812500000e+02 8.190124511718750000e+00 0.000000000000000000e+00 0.000000000000000000e+00 3.329941650390625000e+03 3.473333120346069336e+00 1.500000000000000000e+01 3.000000000000000000e+00 1.438796844482421875e+02 -3.750000000000000000e+00 5.525000000000000000e+01
6.800000000000000000e+01 1.710415384615384710e+03 5.724664916992187500e+02 8.273345947265625000e+00 0.000000000000000000e+00 0.000000000000000000e+00 3.353709228515625000e+03 3.048322677612304688e+00 3.000000000000000000e+00 4.000000000000000000e+00 2.592976684570312500e+02 -3.250000000000000000e+00 5.525000000000000000e+01
7.000000000000000000e+00 1.367607692307691877e+03 5.341276855468750000e+02 8.356567382812500000e+00 0.000000000000000000e+00 0.000000000000000000e+00 3.377476562500000000e+03 3.520092010498046875e+00 3.000000000000000000e+00 1.000000000000000000e+00 2.201969451904296875e+02 -2.750000000000000000e+00 5.525000000000000000e+01
6.000000000000000000e+00 1.091500000000000000e+03 4.706420898437500000e+02 8.439758300781250000e+00 0.000000000000000000e+00 0.000000000000000000e+00 3.401244140625000000e+03 3.543042659759521484e+00 3.000000000000000000e+00 1.000000000000000000e+00 2.229749298095703125e+02 -2.250000000000000000e+00 5.525000000000000000e+01
7.000000000000000000e+00 6.853615384615384301e+02 3.536744079589843750e+02 5.184204101562500000e+00 0.000000000000000000e+00 0.000000000000000000e+00 3.019926757812500000e+03 3.606799364089965820e+00 5.000000000000000000e+00 1.000000000000000000e+00 9.382572174072265625e+01 2.325000000000000000e+01 5.525000000000000000e+01
3.000000000000000000e+01 6.502923076923076451e+02 3.506043090820312500e+02 4.946289062500000000e+00 0.000000000000000000e+00 3.529411852359771729e-01 2.989808105468750000e+03 3.611504316329956055e+00 6.000000000000000000e+00 3.000000000000000000e+00 6.439479827880859375e+01 2.375000000000000000e+01 5.525000000000000000e+01
1.600000000000000000e+01 6.674923076923073495e+02 3.630993652343750000e+02 4.343261718750000000e+00 0.000000000000000000e+00 0.000000000000000000e+00 2.923844238281250000e+03 3.558758258819580078e+00 5.000000000000000000e+00 1.000000000000000000e+00 1.406550750732421875e+02 2.525000000000000000e+01 5.525000000000000000e+01
6.500000000000000000e+01 6.735461538461544251e+02 3.701480712890625000e+02 4.168579101562500000e+00 0.000000000000000000e+00 0.000000000000000000e+00 2.907664062500000000e+03 3.536764621734619141e+00 5.000000000000000000e+00 4.000000000000000000e+00 1.615840606689453125e+02 2.575000000000000000e+01 5.525000000000000000e+01
2.300000000000000000e+01 6.619769230769228443e+02 3.771283569335937500e+02 3.993896484375000000e+00 0.000000000000000000e+00 0.000000000000000000e+00 2.891483642578125000e+03 3.531931400299072266e+00 5.000000000000000000e+00 3.000000000000000000e+00 2.016312255859375000e+02 2.625000000000000000e+01 5.525000000000000000e+01
5.000000000000000000e+01 6.344230769230766782e+02 3.749845581054687500e+02 3.917663574218750000e+00 0.000000000000000000e+00 2.941176593303680420e-01 2.884290283203125000e+03 3.529350757598876953e+00 5.000000000000000000e+00 4.000000000000000000e+00 1.377855529785156250e+02 2.675000000000000000e+01 5.525000000000000000e+01
4.400000000000000000e+01 6.437076923076923549e+02 3.637221069335937500e+02 3.841430664062500000e+00 0.000000000000000000e+00 7.647058963775634766e-01 2.877096923828125000e+03 3.524102210998535156e+00 5.000000000000000000e+00 3.000000000000000000e+00 1.298874206542968750e+02 2.725000000000000000e+01 5.525000000000000000e+01
1.400000000000000000e+01 6.599999999999998863e+02 3.622183837890625000e+02 3.765197753906250000e+00 0.000000000000000000e+00 5.294117927551269531e-01 2.869903320312500000e+03 3.521082162857055664e+00 5.000000000000000000e+00 1.000000000000000000e+00 1.624280242919921875e+02 2.775000000000000000e+01 5.525000000000000000e+01
7.000000000000000000e+00 7.060923076923077133e+02 3.863401184082031250e+02 3.542053222656250000e+00 0.000000000000000000e+00 2.941176593303680420e-01 2.832422607421875000e+03 3.530169010162353516e+00 5.000000000000000000e+00 1.000000000000000000e+00 1.315515747070312500e+02 2.925000000000000000e+01 5.525000000000000000e+01
8.000000000000000000e+00 6.799769230769231854e+02 3.931300964355468750e+02 3.268035888671875000e+00 0.000000000000000000e+00 2.941176593303680420e-01 2.777789550781250000e+03 3.495934009552001953e+00 5.000000000000000000e+00 1.000000000000000000e+00 1.761976776123046875e+02 3.075000000000000000e+01 5.525000000000000000e+01
1.100000000000000000e+01 6.721461538461536520e+02 3.941267700195312500e+02 3.159118652343750000e+00 0.000000000000000000e+00 8.235294222831726074e-01 2.755627929687500000e+03 3.493680477142333984e+00 5.000000000000000000e+00 1.000000000000000000e+00 1.807061004638671875e+02 3.125000000000000000e+01 5.525000000000000000e+01
4.100000000000000000e+01 6.773846153846156994e+02 3.991033935546875000e+02 3.050170898437500000e+00 0.000000000000000000e+00 4.705882370471954346e-01 2.733466064453125000e+03 3.484784126281738281e+00 5.000000000000000000e+00 3.000000000000000000e+00 1.747436828613281250e+02 3.175000000000000000e+01 5.525000000000000000e+01
3.400000000000000000e+01 7.202923076923077588e+02 3.990824584960937500e+02 2.953430175781250000e+00 0.000000000000000000e+00 0.000000000000000000e+00 2.718757568359375000e+03 3.464520454406738281e+00 5.000000000000000000e+00 3.000000000000000000e+00 2.466404113769531250e+02 3.225000000000000000e+01 5.525000000000000000e+01
5.100000000000000000e+01 7.151000000000005912e+02 3.873136901855468750e+02 2.860778808593750000e+00 0.000000000000000000e+00 0.000000000000000000e+00 2.706533691406250000e+03 3.460058689117431641e+00 5.000000000000000000e+00 4.000000000000000000e+00 2.232366333007812500e+02 3.275000000000000000e+01 5.525000000000000000e+01
2.800000000000000000e+01 1.463653846153845961e+03 4.628508300781250000e+02 7.830383300781250000e+00 0.000000000000000000e+00 0.000000000000000000e+00 3.244949951171875000e+03 3.643742322921752930e+00 1.100000000000000000e+01 3.000000000000000000e+00 1.567364501953125000e+02 -4.250000000000000000e+00 5.575000000000000000e+01
5.800000000000000000e+01 9.973076923076919229e+02 4.650332336425781250e+02 7.774261474609375000e+00 0.000000000000000000e+00 0.000000000000000000e+00 3.234195800781250000e+03 3.601208448410034180e+00 3.000000000000000000e+00 4.000000000000000000e+00 2.602102050781250000e+02 -3.750000000000000000e+00 5.575000000000000000e+01
6.000000000000000000e+00 9.377076923076929234e+02 4.839064636230468750e+02 8.238861083984375000e+00 0.000000000000000000e+00 0.000000000000000000e+00 3.318177490234375000e+03 3.616486310958862305e+00 3.000000000000000000e+00 1.000000000000000000e+00 2.700818481445312500e+02 -2.750000000000000000e+00 5.575000000000000000e+01
4.100000000000000000e+01 8.136307692307692605e+02 4.023443908691406250e+02 6.247863769531250000e+00 0.000000000000000000e+00 0.000000000000000000e+00 3.057776123046875000e+03 3.582426309585571289e+00 5.000000000000000000e+00 3.000000000000000000e+00 1.143405609130859375e+02 2.175000000000000000e+01 5.575000000000000000e+01
9.000000000000000000e+00 6.338769230769230489e+02 3.415253601074218750e+02 3.813751220703125000e+00 0.000000000000000000e+00 2.941176593303680420e-01 2.848088623046875000e+03 3.490228414535522461e+00 5.000000000000000000e+00 1.000000000000000000e+00 1.611403045654296875e+02 2.675000000000000000e+01 5.575000000000000000e+01
5.200000000000000000e+01 6.339923076923071221e+02 3.389391174316406250e+02 3.733337402343750000e+00 0.000000000000000000e+00 0.000000000000000000e+00 2.842287597656250000e+03 3.486732959747314453e+00 5.000000000000000000e+00 4.000000000000000000e+00 1.413878631591796875e+02 2.725000000000000000e+01 5.575000000000000000e+01
1.600000000000000000e+01 6.916538461538459615e+02 3.667634582519531250e+02 3.493469238281250000e+00 0.000000000000000000e+00 0.000000000000000000e+00 2.813396728515625000e+03 3.489161491394042969e+00 5.000000000000000000e+00 1.000000000000000000e+00 1.345257720947265625e+02 2.875000000000000000e+01 5.575000000000000000e+01
3.400000000000000000e+01 6.971307692307692605e+02 3.773743591308593750e+02 3.414154052734375000e+00 0.000000000000000000e+00 4.705882370471954346e-01 2.798405517578125000e+03 3.483283281326293945e+00 5.000000000000000000e+00 3.000000000000000000e+00 1.607744903564453125e+02 2.925000000000000000e+01 5.575000000000000000e+01
4.300000000000000000e+01 7.006307692307690331e+02 3.849217529296875000e+02 3.334838867187500000e+00 0.000000000000000000e+00 0.000000000000000000e+00 2.783414062500000000e+03 3.473835706710815430e+00 5.000000000000000000e+00 3.000000000000000000e+00 1.606144409179687500e+02 2.975000000000000000e+01 5.575000000000000000e+01
6.100000000000000000e+01 6.817769230769229125e+02 3.910605163574218750e+02 3.023101806640625000e+00 0.000000000000000000e+00 0.000000000000000000e+00 2.716355712890625000e+03 3.453217267990112305e+00 5.000000000000000000e+00 4.000000000000000000e+00 1.793888244628906250e+02 3.125000000000000000e+01 5.575000000000000000e+01
4.700000000000000000e+01 6.960538461538466208e+02 3.889487609863281250e+02 2.914306640625000000e+00 0.000000000000000000e+00 0.000000000000000000e+00 2.692530761718750000e+03 3.454808235168457031e+00 5.000000000000000000e+00 4.000000000000000000e+00 1.917646636962890625e+02 3.175000000000000000e+01 5.575000000000000000e+01
6.900000000000000000e+01 7.004461538461540613e+02 3.820312194824218750e+02 2.806579589843750000e+00 0.000000000000000000e+00 2.352941185235977173e-01 2.675048828125000000e+03 3.449293375015258789e+00 5.000000000000000000e+00 4.000000000000000000e+00 1.886741485595703125e+02 3.225000000000000000e+01 5.575000000000000000e+01
7.000000000000000000e+01 7.071999999999995907e+02 3.697787780761718750e+02 2.699218750000000000e+00 0.000000000000000000e+00 0.000000000000000000e+00 2.659681152343750000e+03 3.440109252929687500e+00 5.000000000000000000e+00 4.000000000000000000e+00 2.078202209472656250e+02 3.275000000000000000e+01 5.575000000000000000e+01
4.300000000000000000e+01 3.474776923076924504e+03 5.306786499023437500e+02 7.551086425781250000e+00 0.000000000000000000e+00 0.000000000000000000e+00 3.171944335937500000e+03 3.306905984878540039e+00 1.500000000000000000e+01 3.000000000000000000e+00 2.822248229980468750e+02 -4.750000000000000000e+00 5.625000000000000000e+01
1.000000000000000000e+01 2.125561538461537111e+03 4.933419189453125000e+02 7.483886718750000000e+00 0.000000000000000000e+00 0.000000000000000000e+00 3.160502441406250000e+03 3.368021965026855469e+00 2.000000000000000000e+00 1.000000000000000000e+00 2.223640441894531250e+02 -4.250000000000000000e+00 5.625000000000000000e+01
1.700000000000000000e+01 1.425407692307692059e+03 4.491661682128906250e+02 7.416687011718750000e+00 0.000000000000000000e+00 0.000000000000000000e+00 3.149060302734375000e+03 3.526358366012573242e+00 1.100000000000000000e+01 1.000000000000000000e+00 2.948703613281250000e+02 -3.750000000000000000e+00 5.625000000000000000e+01
2.600000000000000000e+01 8.278384615384616154e+02 4.288492126464843750e+02 9.173278808593750000e+00 0.000000000000000000e+00 5.882353186607360840e-01 3.757770996093750000e+03 3.616972208023071289e+00 2.000000000000000000e+00 3.000000000000000000e+00 7.140469360351562500e+01 9.250000000000000000e+00 5.625000000000000000e+01
6.000000000000000000e+01 6.577230769230772012e+02 3.063738403320312500e+02 5.138427734375000000e+00 0.000000000000000000e+00 2.941176593303680420e-01 2.917000000000000000e+03 3.544521570205688477e+00 6.000000000000000000e+00 4.000000000000000000e+00 8.557504272460937500e+01 2.325000000000000000e+01 5.625000000000000000e+01
1.100000000000000000e+01 6.432538461538460979e+02 3.203738098144531250e+02 3.812072753906250000e+00 0.000000000000000000e+00 2.941176593303680420e-01 2.819618896484375000e+03 1.588371396064758301e+00 5.000000000000000000e+00 1.000000000000000000e+00 1.055383148193359375e+02 2.625000000000000000e+01 5.625000000000000000e+01
3.800000000000000000e+01 6.206615384615383846e+02 3.167056579589843750e+02 3.728607177734375000e+00 0.000000000000000000e+00 0.000000000000000000e+00 2.815429443359375000e+03 3.474416494369506836e+00 5.000000000000000000e+00 3.000000000000000000e+00 1.415827026367187500e+02 2.675000000000000000e+01 5.625000000000000000e+01
5.700000000000000000e+01 6.239615384615383391e+02 3.103964233398437500e+02 3.645141601562500000e+00 0.000000000000000000e+00 2.352941185235977173e-01 2.811240234375000000e+03 3.461386442184448242e+00 5.000000000000000000e+00 4.000000000000000000e+00 1.725693664550781250e+02 2.725000000000000000e+01 5.625000000000000000e+01
3.600000000000000000e+01 6.445615384615387029e+02 3.375185241699218750e+02 3.478332519531250000e+00 0.000000000000000000e+00 0.000000000000000000e+00 2.800125244140625000e+03 3.468178749084472656e+00 5.000000000000000000e+00 3.000000000000000000e+00 1.275952301025390625e+02 2.825000000000000000e+01 5.625000000000000000e+01
6.100000000000000000e+01 6.583307692307691923e+02 3.480492858886718750e+02 3.395294189453125000e+00 0.000000000000000000e+00 0.000000000000000000e+00 2.784991455078125000e+03 3.468717813491821289e+00 5.000000000000000000e+00 4.000000000000000000e+00 1.584466705322265625e+02 2.875000000000000000e+01 5.625000000000000000e+01
5.400000000000000000e+01 6.753461538461535838e+02 3.564807128906250000e+02 3.312286376953125000e+00 0.000000000000000000e+00 0.000000000000000000e+00 2.769857666015625000e+03 3.448511362075805664e+00 5.000000000000000000e+00 4.000000000000000000e+00 1.618443908691406250e+02 2.925000000000000000e+01 5.625000000000000000e+01
4.700000000000000000e+01 6.870846153846148354e+02 3.634421691894531250e+02 3.229248046875000000e+00 0.000000000000000000e+00 0.000000000000000000e+00 2.754723632812500000e+03 3.430879116058349609e+00 5.000000000000000000e+00 4.000000000000000000e+00 1.945494689941406250e+02 2.975000000000000000e+01 5.625000000000000000e+01
3.700000000000000000e+01 6.961384615384613426e+02 3.682058715820312500e+02 3.132934570312500000e+00 0.000000000000000000e+00 3.529411852359771729e-01 2.734416015625000000e+03 3.419148683547973633e+00 5.000000000000000000e+00 3.000000000000000000e+00 1.766916656494140625e+02 3.025000000000000000e+01 5.625000000000000000e+01
5.100000000000000000e+01 6.814999999999998863e+02 3.704202575683593750e+02 3.023345947265625000e+00 0.000000000000000000e+00 2.941176593303680420e-01 2.708934326171875000e+03 3.413951396942138672e+00 5.000000000000000000e+00 4.000000000000000000e+00 1.452864990234375000e+02 3.075000000000000000e+01 5.625000000000000000e+01
5.600000000000000000e+01 7.195461538461539703e+02 3.702350463867187500e+02 2.804199218750000000e+00 0.000000000000000000e+00 0.000000000000000000e+00 2.657971191406250000e+03 3.401292800903320312e+00 5.000000000000000000e+00 4.000000000000000000e+00 1.931185760498046875e+02 3.175000000000000000e+01 5.625000000000000000e+01
5.600000000000000000e+01 7.335076923076921958e+02 3.688145446777343750e+02 2.684234619140625000e+00 0.000000000000000000e+00 0.000000000000000000e+00 2.637312255859375000e+03 3.389134645462036133e+00 5.000000000000000000e+00 4.000000000000000000e+00 2.060797882080078125e+02 3.225000000000000000e+01 5.625000000000000000e+01
1.800000000000000000e+01 2.930869230769230853e+03 5.837003784179687500e+02 7.734161376953125000e+00 0.000000000000000000e+00 0.000000000000000000e+00 3.185818847656250000e+03 1.462555289268493652e+00 1.000000000000000000e+01 1.000000000000000000e+00 6.275318603515625000e+02 -4.750000000000000000e+00 5.675000000000000000e+01
2.500000000000000000e+01 2.106930769230769329e+03 5.548103027343750000e+02 7.607482910156250000e+00 0.000000000000000000e+00 0.000000000000000000e+00 3.163267333984375000e+03 2.940403699874877930e+00 1.000000000000000000e+01 3.000000000000000000e+00 4.703217773437500000e+02 -4.250000000000000000e+00 5.675000000000000000e+01
1.100000000000000000e+01 1.331807692307691923e+03 4.716355590820312500e+02 7.480804443359375000e+00 0.000000000000000000e+00 0.000000000000000000e+00 3.140716064453125000e+03 3.122447967529296875e+00 1.000000000000000000e+01 1.000000000000000000e+00 3.625198669433593750e+02 -3.750000000000000000e+00 5.675000000000000000e+01
2.100000000000000000e+01 1.229215384615384892e+03 4.002903137207031250e+02 7.848815917968750000e+00 0.000000000000000000e+00 0.000000000000000000e+00 3.206657714843750000e+03 3.318328857421875000e+00 8.000000000000000000e+00 3.000000000000000000e+00 3.633817443847656250e+02 -3.250000000000000000e+00 5.675000000000000000e+01
3.800000000000000000e+01 7.882692307692304894e+02 3.678193359375000000e+02 8.579406738281250000e+00 0.000000000000000000e+00 0.000000000000000000e+00 3.501272216796875000e+03 3.615591526031494141e+00 2.000000000000000000e+00 3.000000000000000000e+00 6.052594375610351562e+01 9.750000000000000000e+00 5.675000000000000000e+01
6.300000000000000000e+01 9.030384615384615472e+02 4.451020202636718750e+02 7.425292968750000000e+00 0.000000000000000000e+00 0.000000000000000000e+00 3.363606445312500000e+03 3.353956460952758789e+00 2.000000000000000000e+00 4.000000000000000000e+00 1.758786621093750000e+02 1.325000000000000000e+01 5.675000000000000000e+01
6.000000000000000000e+01 8.591923076923080771e+02 4.163653259277343750e+02 7.424377441406250000e+00 0.000000000000000000e+00 0.000000000000000000e+00 3.355833740234375000e+03 2.591903209686279297e+00 2.000000000000000000e+00 4.000000000000000000e+00 1.385520324707031250e+02 1.375000000000000000e+01 5.675000000000000000e+01
6.500000000000000000e+01 8.149384615384610697e+02 3.720779418945312500e+02 7.423431396484375000e+00 0.000000000000000000e+00 0.000000000000000000e+00 3.348060791015625000e+03 2.241542339324951172e+00 2.000000000000000000e+00 4.000000000000000000e+00 1.588611450195312500e+02 1.425000000000000000e+01 5.675000000000000000e+01
3.500000000000000000e+01 7.154538461538461434e+02 2.956061401367187500e+02 7.527862548828125000e+00 0.000000000000000000e+00 0.000000000000000000e+00 3.320866210937500000e+03 2.227182626724243164e+00 2.000000000000000000e+00 3.000000000000000000e+00 1.683968811035156250e+02 1.525000000000000000e+01 5.675000000000000000e+01
5.000000000000000000e+01 6.395615384615383618e+02 2.599871520996093750e+02 7.739501953125000000e+00 0.000000000000000000e+00 0.000000000000000000e+00 3.289794921875000000e+03 2.234594106674194336e+00 2.000000000000000000e+00 4.000000000000000000e+00 1.404634552001953125e+02 1.575000000000000000e+01 5.675000000000000000e+01
2.000000000000000000e+01 7.642769230769226851e+02 3.332088012695312500e+02 6.504211425781250000e+00 0.000000000000000000e+00 5.294117927551269531e-01 2.962738037109375000e+03 3.505289077758789062e+00 5.000000000000000000e+00 3.000000000000000000e+00 6.697109222412109375e+01 2.175000000000000000e+01 5.675000000000000000e+01
6.300000000000000000e+01 7.377692307692309441e+02 2.976175842285156250e+02 6.017486572265625000e+00 0.000000000000000000e+00 0.000000000000000000e+00 2.922127197265625000e+03 3.483761787414550781e+00 5.000000000000000000e+00 4.000000000000000000e+00 7.637767028808593750e+01 2.225000000000000000e+01 5.675000000000000000e+01
1.200000000000000000e+01 7.233307692307694197e+02 2.855840148925781250e+02 5.625915527343750000e+00 0.000000000000000000e+00 0.000000000000000000e+00 2.894290039062500000e+03 3.475123167037963867e+00 5.000000000000000000e+00 1.000000000000000000e+00 1.162440261840820312e+02 2.275000000000000000e+01 5.675000000000000000e+01
5.800000000000000000e+01 6.482076923076922412e+02 2.873854370117187500e+02 5.033172607421875000e+00 0.000000000000000000e+00 5.882352963089942932e-02 2.864163818359375000e+03 3.521001338958740234e+00 6.000000000000000000e+00 4.000000000000000000e+00 1.567174243927001953e+01 2.375000000000000000e+01 5.675000000000000000e+01
3.900000000000000000e+01 6.645230769230770420e+02 3.122741394042968750e+02 4.501739501953125000e+00 0.000000000000000000e+00 0.000000000000000000e+00 2.838147460937500000e+03 3.507069110870361328e+00 5.000000000000000000e+00 3.000000000000000000e+00 4.199258041381835938e+01 2.475000000000000000e+01 5.675000000000000000e+01
5.600000000000000000e+01 6.933153846153848008e+02 3.180057678222656250e+02 4.287170410156250000e+00 0.000000000000000000e+00 0.000000000000000000e+00 2.828564208984375000e+03 3.412457704544067383e+00 5.000000000000000000e+00 4.000000000000000000e+00 8.873045349121093750e+01 2.525000000000000000e+01 5.675000000000000000e+01
2.300000000000000000e+01 6.937461538461540158e+02 3.105531311035156250e+02 4.072570800781250000e+00 0.000000000000000000e+00 0.000000000000000000e+00 2.818980957031250000e+03 3.437428951263427734e+00 5.000000000000000000e+00 3.000000000000000000e+00 1.556357116699218750e+02 2.575000000000000000e+01 5.675000000000000000e+01
4.100000000000000000e+01 6.726538461538461888e+02 3.138181457519531250e+02 3.858001708984375000e+00 0.000000000000000000e+00 5.882352963089942932e-02 2.809397705078125000e+03 3.434435367584228516e+00 5.000000000000000000e+00 3.000000000000000000e+00 1.098582229614257812e+02 2.625000000000000000e+01 5.675000000000000000e+01
6.000000000000000000e+00 6.384769230769231854e+02 3.266265258789062500e+02 3.779479980468750000e+00 0.000000000000000000e+00 0.000000000000000000e+00 2.808406738281250000e+03 3.435195684432983398e+00 5.000000000000000000e+00 1.000000000000000000e+00 9.135556030273437500e+01 2.675000000000000000e+01 5.675000000000000000e+01
3.700000000000000000e+01 6.495846153846152902e+02 3.393106994628906250e+02 3.545288085937500000e+00 0.000000000000000000e+00 5.294117927551269531e-01 2.802927490234375000e+03 3.432758808135986328e+00 5.000000000000000000e+00 3.000000000000000000e+00 1.021720046997070312e+02 2.825000000000000000e+01 5.675000000000000000e+01
1.300000000000000000e+01 6.907846153846159041e+02 3.526873779296875000e+02 3.398773193359375000e+00 0.000000000000000000e+00 0.000000000000000000e+00 2.780893554687500000e+03 3.397206544876098633e+00 5.000000000000000000e+00 1.000000000000000000e+00 2.019937438964843750e+02 2.925000000000000000e+01 5.675000000000000000e+01
5.000000000000000000e+01 6.887230769230768601e+02 3.536138000488281250e+02 3.325500488281250000e+00 0.000000000000000000e+00 0.000000000000000000e+00 2.769876464843750000e+03 3.399918556213378906e+00 5.000000000000000000e+00 4.000000000000000000e+00 2.189666900634765625e+02 2.975000000000000000e+01 5.675000000000000000e+01
2.700000000000000000e+01 6.557999999999999545e+02 3.539901733398437500e+02 3.230560302734375000e+00 0.000000000000000000e+00 1.058823585510253906e+00 2.750823486328125000e+03 3.421592950820922852e+00 5.000000000000000000e+00 3.000000000000000000e+00 9.970418548583984375e+01 3.025000000000000000e+01 5.675000000000000000e+01
5.200000000000000000e+01 6.530384615384615472e+02 3.536959838867187500e+02 3.113983154296875000e+00 0.000000000000000000e+00 4.705882370471954346e-01 2.723734375000000000e+03 3.427127122879028320e+00 5.000000000000000000e+00 4.000000000000000000e+00 1.008429565429687500e+02 3.075000000000000000e+01 5.675000000000000000e+01
7.100000000000000000e+01 6.937461538461540158e+02 3.550222778320312500e+02 2.997375488281250000e+00 0.000000000000000000e+00 0.000000000000000000e+00 2.696645263671875000e+03 3.392342090606689453e+00 5.000000000000000000e+00 4.000000000000000000e+00 1.284442291259765625e+02 3.125000000000000000e+01 5.675000000000000000e+01
6.100000000000000000e+01 7.650692307692305576e+02 3.676849975585937500e+02 2.739288330078125000e+00 0.000000000000000000e+00 0.000000000000000000e+00 2.642800292968750000e+03 3.326253414154052734e+00 5.000000000000000000e+00 4.000000000000000000e+00 2.319768981933593750e+02 3.225000000000000000e+01 5.675000000000000000e+01
6.600000000000000000e+01 7.674000000000004320e+02 3.729861450195312500e+02 2.589477539062500000e+00 0.000000000000000000e+00 0.000000000000000000e+00 2.616155273437500000e+03 3.328984260559082031e+00 5.000000000000000000e+00 4.000000000000000000e+00 2.277443084716796875e+02 3.275000000000000000e+01 5.675000000000000000e+01
4.600000000000000000e+01 1.727446153846153493e+03 5.912888793945312500e+02 7.917236328125000000e+00 0.000000000000000000e+00 0.000000000000000000e+00 3.199693115234375000e+03 3.166971921920776367e+00 1.000000000000000000e+01 4.000000000000000000e+00 4.560382385253906250e+02 -4.750000000000000000e+00 5.725000000000000000e+01
2.000000000000000000e+01 1.350784615384616018e+03 5.495457153320312500e+02 7.731079101562500000e+00 0.000000000000000000e+00 0.000000000000000000e+00 3.166032470703125000e+03 3.190155744552612305e+00 1.000000000000000000e+01 3.000000000000000000e+00 6.028008422851562500e+02 -4.250000000000000000e+00 5.725000000000000000e+01
4.500000000000000000e+01 1.117746153846154357e+03 4.633446960449218750e+02 7.544921875000000000e+00 0.000000000000000000e+00 2.941176593303680420e-01 3.132372070312500000e+03 3.174702644348144531e+00 2.000000000000000000e+00 4.000000000000000000e+00 2.386481018066406250e+02 -3.750000000000000000e+00 5.725000000000000000e+01
1.400000000000000000e+01 1.100807692307692378e+03 4.033759155273437500e+02 7.917175292968750000e+00 0.000000000000000000e+00 0.000000000000000000e+00 3.205393554687500000e+03 3.232218503952026367e+00 2.000000000000000000e+00 1.000000000000000000e+00 5.822686157226562500e+02 -3.250000000000000000e+00 5.725000000000000000e+01
2.800000000000000000e+01 1.069023076923077497e+03 3.843417663574218750e+02 8.289398193359375000e+00 0.000000000000000000e+00 0.000000000000000000e+00 3.278415039062500000e+03 3.406359195709228516e+00 2.000000000000000000e+00 3.000000000000000000e+00 2.227668304443359375e+02 -2.750000000000000000e+00 5.725000000000000000e+01
6.100000000000000000e+01 9.010461538461541977e+02 5.158928833007812500e+02 6.884887695312500000e+00 0.000000000000000000e+00 0.000000000000000000e+00 3.203424072265625000e+03 2.219377517700195312e+00 2.000000000000000000e+00 4.000000000000000000e+00 1.629482727050781250e+02 1.325000000000000000e+01 5.725000000000000000e+01
4.100000000000000000e+01 8.935769230769227534e+02 4.791905517578125000e+02 6.943756103515625000e+00 0.000000000000000000e+00 0.000000000000000000e+00 3.210125976562500000e+03 2.190520048141479492e+00 2.000000000000000000e+00 3.000000000000000000e+00 1.827915802001953125e+02 1.375000000000000000e+01 5.725000000000000000e+01
2.300000000000000000e+01 8.414307692307692150e+02 4.173296813964843750e+02 7.002593994140625000e+00 0.000000000000000000e+00 0.000000000000000000e+00 3.216827880859375000e+03 2.172127008438110352e+00 2.000000000000000000e+00 3.000000000000000000e+00 1.931913909912109375e+02 1.425000000000000000e+01 5.725000000000000000e+01
5.900000000000000000e+01 8.006153846153843006e+02 3.747109985351562500e+02 7.061462402343750000e+00 0.000000000000000000e+00 0.000000000000000000e+00 3.223530029296875000e+03 2.166427135467529297e+00 2.000000000000000000e+00 4.000000000000000000e+00 2.316350555419921875e+02 1.475000000000000000e+01 5.725000000000000000e+01
5.100000000000000000e+01 7.375384615384615472e+02 3.437372741699218750e+02 7.230987548828125000e+00 0.000000000000000000e+00 0.000000000000000000e+00 3.221989257812500000e+03 2.175779581069946289e+00 2.000000000000000000e+00 4.000000000000000000e+00 2.729427490234375000e+02 1.525000000000000000e+01 5.725000000000000000e+01
6.500000000000000000e+01 6.636999999999997044e+02 3.269329833984375000e+02 7.511169433593750000e+00 0.000000000000000000e+00 0.000000000000000000e+00 3.212206054687500000e+03 2.205031156539916992e+00 2.000000000000000000e+00 4.000000000000000000e+00 1.524174499511718750e+02 1.575000000000000000e+01 5.725000000000000000e+01
5.200000000000000000e+01 7.140153846153849599e+02 3.336515197753906250e+02 6.656219482421875000e+00 0.000000000000000000e+00 2.941176593303680420e-01 2.924702392578125000e+03 3.499300003051757812e+00 5.000000000000000000e+00 4.000000000000000000e+00 2.267534065246582031e+01 2.175000000000000000e+01 5.725000000000000000e+01
5.800000000000000000e+01 6.827230769230766327e+02 3.047343750000000000e+02 6.235443115234375000e+00 0.000000000000000000e+00 0.000000000000000000e+00 2.876148437500000000e+03 3.469864368438720703e+00 5.000000000000000000e+00 4.000000000000000000e+00 3.572573471069335938e+01 2.225000000000000000e+01 5.725000000000000000e+01
4.400000000000000000e+01 6.992076923076922412e+02 3.147794189453125000e+02 4.592041015625000000e+00 0.000000000000000000e+00 0.000000000000000000e+00 2.820497558593750000e+03 3.063303947448730469e+00 5.000000000000000000e+00 3.000000000000000000e+00 5.865323257446289062e+01 2.475000000000000000e+01 5.725000000000000000e+01
2.500000000000000000e+01 7.558923076923080089e+02 3.180526123046875000e+02 4.133300781250000000e+00 0.000000000000000000e+00 0.000000000000000000e+00 2.806283447265625000e+03 3.382932424545288086e+00 5.000000000000000000e+00 3.000000000000000000e+00 2.098515777587890625e+02 2.575000000000000000e+01 5.725000000000000000e+01
5.100000000000000000e+01 6.926076923076921048e+02 3.558192138671875000e+02 3.756835937500000000e+00 0.000000000000000000e+00 0.000000000000000000e+00 2.803591552734375000e+03 3.397406101226806641e+00 5.000000000000000000e+00 4.000000000000000000e+00 1.287908325195312500e+02 2.725000000000000000e+01 5.725000000000000000e+01
4.100000000000000000e+01 6.228384615384615017e+02 3.620934448242187500e+02 3.548767089843750000e+00 0.000000000000000000e+00 1.176470637321472168e+00 2.798829589843750000e+03 3.440667867660522461e+00 5.000000000000000000e+00 3.000000000000000000e+00 8.288832092285156250e+01 2.875000000000000000e+01 5.725000000000000000e+01
5.200000000000000000e+01 6.700384615384615472e+02 3.652510070800781250e+02 3.485260009765625000e+00 0.000000000000000000e+00 0.000000000000000000e+00 2.791929443359375000e+03 3.417587518692016602e+00 5.000000000000000000e+00 4.000000000000000000e+00 1.359833221435546875e+02 2.925000000000000000e+01 5.725000000000000000e+01
3.200000000000000000e+01 6.511615384615383846e+02 3.616978759765625000e+02 3.421752929687500000e+00 0.000000000000000000e+00 0.000000000000000000e+00 2.785029296875000000e+03 3.420515298843383789e+00 5.000000000000000000e+00 3.000000000000000000e+00 9.696217346191406250e+01 2.975000000000000000e+01 5.725000000000000000e+01
2.400000000000000000e+01 6.689615384615384528e+02 3.539636230468750000e+02 3.080993652343750000e+00 0.000000000000000000e+00 0.000000000000000000e+00 2.709837890625000000e+03 3.409824848175048828e+00 5.000000000000000000e+00 3.000000000000000000e+00 7.934889984130859375e+01 3.125000000000000000e+01 5.725000000000000000e+01
6.000000000000000000e+01 6.930846153846154039e+02 3.603147888183593750e+02 2.957366943359375000e+00 0.000000000000000000e+00 0.000000000000000000e+00 2.681141357421875000e+03 3.382931470870971680e+00 5.000000000000000000e+00 4.000000000000000000e+00 1.019363479614257812e+02 3.175000000000000000e+01 5.725000000000000000e+01
6.000000000000000000e+01 7.554307692307694424e+02 3.698692932128906250e+02 2.794342041015625000e+00 0.000000000000000000e+00 0.000000000000000000e+00 2.648288085937500000e+03 3.339412450790405273e+00 5.000000000000000000e+00 4.000000000000000000e+00 2.415124816894531250e+02 3.225000000000000000e+01 5.725000000000000000e+01
2.600000000000000000e+01 2.270176923076922321e+03 5.907687377929687500e+02 8.345916748046875000e+00 0.000000000000000000e+00 0.000000000000000000e+00 3.258337158203125000e+03 3.402065753936767578e+00 1.000000000000000000e+01 3.000000000000000000e+00 3.520024414062500000e+02 -5.250000000000000000e+00 5.775000000000000000e+01
4.000000000000000000e+01 1.752269230769230944e+03 5.813890380859375000e+02 8.100311279296875000e+00 0.000000000000000000e+00 0.000000000000000000e+00 3.213567382812500000e+03 3.293691158294677734e+00 1.000000000000000000e+01 3.000000000000000000e+00 3.792850036621093750e+02 -4.750000000000000000e+00 5.775000000000000000e+01
6.000000000000000000e+01 8.976923076923080771e+02 4.581396484375000000e+02 6.519409179687500000e+00 0.000000000000000000e+00 0.000000000000000000e+00 3.037287109375000000e+03 2.214523792266845703e+00 2.000000000000000000e+00 4.000000000000000000e+00 2.141075897216796875e+02 1.275000000000000000e+01 5.775000000000000000e+01
5.900000000000000000e+01 8.729307692307688740e+02 4.651949157714843750e+02 6.463134765625000000e+00 0.000000000000000000e+00 0.000000000000000000e+00 3.064418457031250000e+03 2.152083635330200195e+00 2.000000000000000000e+00 4.000000000000000000e+00 2.871552429199218750e+02 1.375000000000000000e+01 5.775000000000000000e+01
3.300000000000000000e+01 8.104692307692313307e+02 4.305044860839843750e+02 6.581756591796875000e+00 0.000000000000000000e+00 0.000000000000000000e+00 3.085595214843750000e+03 2.142647266387939453e+00 2.000000000000000000e+00 3.000000000000000000e+00 2.009948272705078125e+02 1.425000000000000000e+01 5.775000000000000000e+01
2.900000000000000000e+01 8.110923076923074859e+02 3.846478881835937500e+02 6.700378417968750000e+00 0.000000000000000000e+00 0.000000000000000000e+00 3.106771972656250000e+03 2.138453722000122070e+00 2.000000000000000000e+00 3.000000000000000000e+00 2.609361572265625000e+02 1.475000000000000000e+01 5.775000000000000000e+01
4.200000000000000000e+01 7.466538461538459615e+02 3.498488464355468750e+02 6.934082031250000000e+00 0.000000000000000000e+00 0.000000000000000000e+00 3.123112548828125000e+03 2.154980897903442383e+00 2.000000000000000000e+00 3.000000000000000000e+00 2.547777862548828125e+02 1.525000000000000000e+01 5.775000000000000000e+01
5.500000000000000000e+01 6.896230769230769511e+02 3.445717468261718750e+02 7.282867431640625000e+00 0.000000000000000000e+00 0.000000000000000000e+00 3.134616943359375000e+03 2.192707538604736328e+00 2.000000000000000000e+00 4.000000000000000000e+00 1.382846832275390625e+02 1.575000000000000000e+01 5.775000000000000000e+01
5.200000000000000000e+01 6.311230769230770647e+02 3.278721008300781250e+02 7.631652832031250000e+00 0.000000000000000000e+00 0.000000000000000000e+00 3.146121337890625000e+03 2.226824045181274414e+00 2.000000000000000000e+00 4.000000000000000000e+00 9.987860107421875000e+01 1.625000000000000000e+01 5.775000000000000000e+01
5.700000000000000000e+01 7.218999999999996362e+02 3.269328002929687500e+02 4.194000244140625000e+00 0.000000000000000000e+00 0.000000000000000000e+00 2.793586181640625000e+03 3.414235591888427734e+00 5.000000000000000000e+00 4.000000000000000000e+00 6.547473907470703125e+01 2.575000000000000000e+01 5.775000000000000000e+01
4.900000000000000000e+01 7.046153846153845279e+02 3.438767395019531250e+02 3.949829101562500000e+00 0.000000000000000000e+00 0.000000000000000000e+00 2.788955322265625000e+03 3.401924610137939453e+00 5.000000000000000000e+00 4.000000000000000000e+00 6.987260437011718750e+01 2.625000000000000000e+01 5.775000000000000000e+01
2.500000000000000000e+01 7.110384615384615472e+02 3.431906127929687500e+02 3.881256103515625000e+00 0.000000000000000000e+00 0.000000000000000000e+00 2.794361328125000000e+03 3.373242855072021484e+00 5.000000000000000000e+00 3.000000000000000000e+00 8.252747344970703125e+01 2.675000000000000000e+01 5.775000000000000000e+01
1.000000000000000000e+01 6.439153846153847098e+02 3.756060791015625000e+02 3.625488281250000000e+00 0.000000000000000000e+00 4.705882370471954346e-01 2.805748535156250000e+03 3.415953159332275391e+00 5.000000000000000000e+00 1.000000000000000000e+00 6.017695617675781250e+01 2.875000000000000000e+01 5.775000000000000000e+01
1.300000000000000000e+01 6.500999999999997954e+02 3.747274475097656250e+02 3.571746826171875000e+00 0.000000000000000000e+00 7.647058963775634766e-01 2.802965332031250000e+03 3.409893035888671875e+00 5.000000000000000000e+00 1.000000000000000000e+00 6.002565383911132812e+01 2.925000000000000000e+01 5.775000000000000000e+01
6.200000000000000000e+01 6.508538461538460069e+02 3.704983215332031250e+02 3.518005371093750000e+00 0.000000000000000000e+00 4.117647111415863037e-01 2.800181884765625000e+03 2.919474124908447266e+00 5.000000000000000000e+00 4.000000000000000000e+00 8.742331695556640625e+01 2.975000000000000000e+01 5.775000000000000000e+01
5.700000000000000000e+01 6.499846153846156085e+02 3.629448852539062500e+02 3.425842285156250000e+00 0.000000000000000000e+00 4.705882370471954346e-01 2.783638427734375000e+03 3.372239828109741211e+00 5.000000000000000000e+00 4.000000000000000000e+00 8.827584838867187500e+01 3.025000000000000000e+01 5.775000000000000000e+01
5.800000000000000000e+01 6.575461538461536293e+02 3.546815490722656250e+02 3.295196533203125000e+00 0.000000000000000000e+00 2.941176593303680420e-01 2.753334472656250000e+03 3.422737598419189453e+00 5.000000000000000000e+00 4.000000000000000000e+00 9.180575561523437500e+01 3.075000000000000000e+01 5.775000000000000000e+01
5.900000000000000000e+01 6.562615384615385210e+02 3.529877014160156250e+02 3.164581298828125000e+00 0.000000000000000000e+00 6.470588445663452148e-01 2.723030517578125000e+03 3.420522212982177734e+00 5.000000000000000000e+00 4.000000000000000000e+00 6.484266662597656250e+01 3.125000000000000000e+01 5.775000000000000000e+01
2.200000000000000000e+01 6.617692307692304894e+02 3.561434020996093750e+02 3.033966064453125000e+00 0.000000000000000000e+00 0.000000000000000000e+00 2.692726562500000000e+03 3.414576530456542969e+00 5.000000000000000000e+00 3.000000000000000000e+00 3.799631500244140625e+01 3.175000000000000000e+01 5.775000000000000000e+01
2.600000000000000000e+01 6.917307692307692832e+02 3.639618835449218750e+02 2.849426269531250000e+00 0.000000000000000000e+00 2.352941185235977173e-01 2.653776123046875000e+03 3.381642580032348633e+00 5.000000000000000000e+00 3.000000000000000000e+00 6.247414779663085938e+01 3.225000000000000000e+01 5.775000000000000000e+01
5.100000000000000000e+01 7.530538461538461661e+02 3.705657653808593750e+02 2.646911621093750000e+00 0.000000000000000000e+00 0.000000000000000000e+00 2.611943603515625000e+03 3.329993009567260742e+00 5.000000000000000000e+00 4.000000000000000000e+00 2.173568115234375000e+02 3.275000000000000000e+01 5.775000000000000000e+01
2.200000000000000000e+01 1.934784615384614881e+03 5.524427490234375000e+02 8.280090332031250000e+00 0.000000000000000000e+00 0.000000000000000000e+00 3.233111572265625000e+03 1.472214698791503906e+00 1.000000000000000000e+01 3.000000000000000000e+00 3.705987548828125000e+02 -4.750000000000000000e+00 5.825000000000000000e+01
6.000000000000000000e+00 1.404492307692307804e+03 5.038185729980468750e+02 8.020629882812500000e+00 0.000000000000000000e+00 2.941176593303680420e-01 3.186308349609375000e+03 2.854807615280151367e+00 1.500000000000000000e+01 1.000000000000000000e+00 2.781550598144531250e+02 -4.250000000000000000e+00 5.825000000000000000e+01
1.800000000000000000e+01 1.099576923076923322e+03 4.201376953125000000e+02 7.761169433593750000e+00 0.000000000000000000e+00 2.941176593303680420e-01 3.139505371093750000e+03 3.454264640808105469e+00 1.500000000000000000e+01 1.000000000000000000e+00 3.463065795898437500e+02 -3.750000000000000000e+00 5.825000000000000000e+01
3.600000000000000000e+01 1.872361538461537975e+03 5.894415283203125000e+02 7.498901367187500000e+00 0.000000000000000000e+00 0.000000000000000000e+00 2.970156738281250000e+03 2.149418830871582031e+00 2.000000000000000000e+00 3.000000000000000000e+00 3.165061035156250000e+02 7.250000000000000000e+00 5.825000000000000000e+01
5.200000000000000000e+01 6.530461538461538566e+02 2.908620910644531250e+02 6.867950439453125000e+00 0.000000000000000000e+00 0.000000000000000000e+00 3.027960693359375000e+03 2.207585573196411133e+00 2.000000000000000000e+00 4.000000000000000000e+00 1.095952758789062500e+02 1.575000000000000000e+01 5.825000000000000000e+01
2.200000000000000000e+01 7.299846153846148127e+02 3.429496765136718750e+02 4.176910400390625000e+00 0.000000000000000000e+00 2.941176593303680420e-01 2.772213378906250000e+03 3.387454986572265625e+00 5.000000000000000000e+00 3.000000000000000000e+00 7.955011749267578125e+01 2.575000000000000000e+01 5.825000000000000000e+01
5.600000000000000000e+01 6.676076923076923322e+02 3.641980285644531250e+02 3.639739990234375000e+00 0.000000000000000000e+00 2.352941185235977173e-01 2.791677001953125000e+03 3.375841379165649414e+00 5.000000000000000000e+00 4.000000000000000000e+00 9.487413024902343750e+01 2.825000000000000000e+01 5.825000000000000000e+01
5.900000000000000000e+01 6.850846153846154039e+02 3.744267578125000000e+02 3.591796875000000000e+00 0.000000000000000000e+00 0.000000000000000000e+00 2.791167480468750000e+03 3.364866733551025391e+00 5.000000000000000000e+00 4.000000000000000000e+00 1.334132537841796875e+02 2.875000000000000000e+01 5.825000000000000000e+01
6.000000000000000000e+01 6.492230769230772012e+02 3.752180480957031250e+02 3.543853759765625000e+00 0.000000000000000000e+00 0.000000000000000000e+00 2.790657958984375000e+03 3.379631519317626953e+00 5.000000000000000000e+00 4.000000000000000000e+00 1.090108413696289062e+02 2.925000000000000000e+01 5.825000000000000000e+01
1.000000000000000000e+01 6.442999999999999545e+02 3.711751403808593750e+02 3.495910644531250000e+00 0.000000000000000000e+00 0.000000000000000000e+00 2.790148437500000000e+03 3.398287773132324219e+00 5.000000000000000000e+00 1.000000000000000000e+00 7.491495513916015625e+01 2.975000000000000000e+01 5.825000000000000000e+01
4.500000000000000000e+01 6.283153846153844597e+02 3.662672729492187500e+02 3.408538818359375000e+00 0.000000000000000000e+00 0.000000000000000000e+00 2.775235595703125000e+03 3.359839916229248047e+00 5.000000000000000000e+00 4.000000000000000000e+00 5.278423309326171875e+01 3.025000000000000000e+01 5.825000000000000000e+01
3.600000000000000000e+01 6.536692307692308077e+02 3.553922729492187500e+02 3.028076171875000000e+00 0.000000000000000000e+00 3.529411852359771729e-01 2.687288330078125000e+03 2.344584703445434570e+00 5.000000000000000000e+00 3.000000000000000000e+00 3.692427825927734375e+01 3.175000000000000000e+01 5.825000000000000000e+01
5.800000000000000000e+01 6.829615384615383391e+02 3.583462524414062500e+02 2.832061767578125000e+00 0.000000000000000000e+00 0.000000000000000000e+00 2.645395751953125000e+03 3.378880739212036133e+00 5.000000000000000000e+00 4.000000000000000000e+00 7.212377929687500000e+01 3.225000000000000000e+01 5.825000000000000000e+01
5.700000000000000000e+01 7.272076923076923549e+02 3.650321350097656250e+02 2.613006591796875000e+00 0.000000000000000000e+00 0.000000000000000000e+00 2.599311279296875000e+03 3.328058004379272461e+00 5.000000000000000000e+00 4.000000000000000000e+00 1.182923812866210938e+02 3.275000000000000000e+01 5.825000000000000000e+01
1.800000000000000000e+01 2.292376923076922139e+03 6.257787475585937500e+02 6.621063232421875000e+00 0.000000000000000000e+00 0.000000000000000000e+00 2.746415039062500000e+03 2.025158882141113281e+00 1.200000000000000000e+01 1.000000000000000000e+00 4.952757568359375000e+02 6.250000000000000000e+00 5.875000000000000000e+01
2.300000000000000000e+01 1.921023076923077497e+03 6.338890380859375000e+02 6.154052734375000000e+00 0.000000000000000000e+00 0.000000000000000000e+00 2.628162841796875000e+03 1.555526852607727051e+00 2.000000000000000000e+00 3.000000000000000000e+00 5.693630981445312500e+02 6.750000000000000000e+00 5.875000000000000000e+01
7.000000000000000000e+00 1.721723076923076860e+03 6.163695678710937500e+02 5.687042236328125000e+00 0.000000000000000000e+00 0.000000000000000000e+00 2.509910400390625000e+03 1.646794557571411133e+00 2.000000000000000000e+00 1.000000000000000000e+00 8.662701416015625000e+02 7.250000000000000000e+00 5.875000000000000000e+01
5.000000000000000000e+01 1.378546153846154311e+03 5.885505371093750000e+02 5.374023437500000000e+00 0.000000000000000000e+00 0.000000000000000000e+00 2.453531494140625000e+03 1.939907550811767578e+00 2.000000000000000000e+00 4.000000000000000000e+00 4.289379882812500000e+02 7.750000000000000000e+00 5.875000000000000000e+01
5.400000000000000000e+01 1.228176923076923003e+03 5.579427490234375000e+02 5.214996337890625000e+00 0.000000000000000000e+00 0.000000000000000000e+00 2.459025878906250000e+03 1.988010525703430176e+00 2.000000000000000000e+00 4.000000000000000000e+00 2.909396972656250000e+02 8.250000000000000000e+00 5.875000000000000000e+01
5.800000000000000000e+01 1.294199999999999818e+03 5.211113891601562500e+02 5.055969238281250000e+00 0.000000000000000000e+00 0.000000000000000000e+00 2.464520019531250000e+03 2.066010713577270508e+00 2.000000000000000000e+00 4.000000000000000000e+00 2.974413452148437500e+02 8.750000000000000000e+00 5.875000000000000000e+01
5.000000000000000000e+01 9.869615384615384528e+02 3.972496032714843750e+02 4.610839843750000000e+00 0.000000000000000000e+00 0.000000000000000000e+00 2.532045654296875000e+03 2.171107530593872070e+00 2.000000000000000000e+00 4.000000000000000000e+00 1.552865295410156250e+02 1.175000000000000000e+01 5.875000000000000000e+01
6.300000000000000000e+01 7.070999999999997954e+02 2.935683593750000000e+02 5.608001708984375000e+00 0.000000000000000000e+00 0.000000000000000000e+00 2.808496093750000000e+03 2.159280300140380859e+00 8.000000000000000000e+00 4.000000000000000000e+00 1.339658660888671875e+02 1.525000000000000000e+01 5.875000000000000000e+01
6.300000000000000000e+01 6.673076923076924913e+02 2.896881103515625000e+02 6.041992187500000000e+00 0.000000000000000000e+00 0.000000000000000000e+00 2.857267578125000000e+03 2.176037788391113281e+00 8.000000000000000000e+00 4.000000000000000000e+00 6.955163574218750000e+01 1.575000000000000000e+01 5.875000000000000000e+01
5.500000000000000000e+01 6.295923076923078270e+02 2.936181030273437500e+02 6.475982666015625000e+00 0.000000000000000000e+00 0.000000000000000000e+00 2.906039062500000000e+03 2.195926666259765625e+00 8.000000000000000000e+00 4.000000000000000000e+00 1.007149276733398438e+02 1.625000000000000000e+01 5.875000000000000000e+01
6.000000000000000000e+00 6.585153846153846189e+02 3.561891784667968750e+02 4.821136474609375000e+00 0.000000000000000000e+00 0.000000000000000000e+00 2.752949462890625000e+03 3.393476724624633789e+00 8.000000000000000000e+00 1.000000000000000000e+00 1.664689254760742188e+01 2.425000000000000000e+01 5.875000000000000000e+01
5.600000000000000000e+01 6.825461538461537430e+02 3.808283081054687500e+02 4.518646240234375000e+00 0.000000000000000000e+00 0.000000000000000000e+00 2.748674316406250000e+03 3.396933794021606445e+00 8.000000000000000000e+00 4.000000000000000000e+00 5.241391754150390625e+01 2.475000000000000000e+01 5.875000000000000000e+01
5.800000000000000000e+01 7.377999999999999545e+02 3.490151672363281250e+02 3.723205566406250000e+00 0.000000000000000000e+00 0.000000000000000000e+00 2.723256347656250000e+03 3.346666812896728516e+00 8.000000000000000000e+00 4.000000000000000000e+00 8.024579620361328125e+01 2.625000000000000000e+01 5.875000000000000000e+01
4.400000000000000000e+01 6.807153846153844370e+02 3.516558532714843750e+02 3.365783691406250000e+00 0.000000000000000000e+00 5.882352963089942932e-02 2.731517333984375000e+03 3.338852405548095703e+00 5.000000000000000000e+00 3.000000000000000000e+00 8.765771484375000000e+01 2.825000000000000000e+01 5.875000000000000000e+01
4.300000000000000000e+01 6.739846153846154948e+02 3.704968872070312500e+02 3.314880371093750000e+00 0.000000000000000000e+00 0.000000000000000000e+00 2.729220947265625000e+03 3.342507839202880859e+00 5.000000000000000000e+00 3.000000000000000000e+00 8.053706359863281250e+01 2.875000000000000000e+01 5.875000000000000000e+01
3.400000000000000000e+01 6.490692307692307850e+02 3.755928955078125000e+02 3.213043212890625000e+00 0.000000000000000000e+00 4.705882370471954346e-01 2.724627685546875000e+03 3.207942008972167969e+00 5.000000000000000000e+00 3.000000000000000000e+00 8.849605560302734375e+01 2.975000000000000000e+01 5.875000000000000000e+01
4.500000000000000000e+01 6.418076923076922640e+02 3.729899291992187500e+02 3.138000488281250000e+00 0.000000000000000000e+00 4.705882370471954346e-01 2.712174804687500000e+03 2.183205604553222656e+00 5.000000000000000000e+00 4.000000000000000000e+00 6.886281585693359375e+01 3.025000000000000000e+01 5.875000000000000000e+01
5.000000000000000000e+01 6.495076923076920821e+02 3.679944763183593750e+02 3.038848876953125000e+00 0.000000000000000000e+00 7.058823704719543457e-01 2.689565429687500000e+03 2.975588798522949219e+00 5.000000000000000000e+00 4.000000000000000000e+00 6.303990554809570312e+01 3.075000000000000000e+01 5.875000000000000000e+01
6.000000000000000000e+00 6.490999999999997954e+02 3.618758850097656250e+02 2.840515136718750000e+00 0.000000000000000000e+00 2.941176593303680420e-01 2.644346923828125000e+03 2.172253847122192383e+00 5.000000000000000000e+00 1.000000000000000000e+00 4.676434707641601562e+01 3.175000000000000000e+01 5.875000000000000000e+01
4.700000000000000000e+01 6.824384615384614108e+02 3.658506469726562500e+02 2.655212402343750000e+00 0.000000000000000000e+00 4.705882370471954346e-01 2.606463134765625000e+03 2.225396871566772461e+00 5.000000000000000000e+00 4.000000000000000000e+00 7.099454498291015625e+01 3.225000000000000000e+01 5.875000000000000000e+01
7.000000000000000000e+00 7.229076923076925141e+02 3.727977905273437500e+02 2.441192626953125000e+00 0.000000000000000000e+00 4.705882370471954346e-01 2.563488037109375000e+03 3.320963382720947266e+00 5.000000000000000000e+00 1.000000000000000000e+00 9.050857543945312500e+01 3.275000000000000000e+01 5.875000000000000000e+01
4.000000000000000000e+00 1.374684615384615427e+03 6.258066406250000000e+02 3.875152587890625000e+00 0.000000000000000000e+00 0.000000000000000000e+00 2.049664306640625000e+03 1.423833250999450684e+00 2.000000000000000000e+00 1.000000000000000000e+00 1.110918457031250000e+03 7.250000000000000000e+00 5.925000000000000000e+01
1.100000000000000000e+01 1.082269230769230944e+03 5.929558715820312500e+02 3.467163085937500000e+00 0.000000000000000000e+00 0.000000000000000000e+00 1.985281738281250000e+03 1.739748716354370117e+00 2.000000000000000000e+00 1.000000000000000000e+00 8.292766113281250000e+02 7.750000000000000000e+00 5.925000000000000000e+01
5.100000000000000000e+01 1.160430769230768874e+03 4.867227783203125000e+02 3.190765380859375000e+00 0.000000000000000000e+00 0.000000000000000000e+00 2.063139892578125000e+03 1.950732111930847168e+00 2.000000000000000000e+00 4.000000000000000000e+00 4.403182678222656250e+02 8.750000000000000000e+00 5.925000000000000000e+01
2.000000000000000000e+01 1.096461538461538112e+03 4.357495727539062500e+02 3.052581787109375000e+00 0.000000000000000000e+00 0.000000000000000000e+00 2.102069091796875000e+03 1.992485880851745605e+00 2.000000000000000000e+00 3.000000000000000000e+00 1.361690216064453125e+02 9.250000000000000000e+00 5.925000000000000000e+01
4.700000000000000000e+01 1.163653846153846189e+03 3.900656433105468750e+02 3.014678955078125000e+00 0.000000000000000000e+00 0.000000000000000000e+00 2.129760498046875000e+03 2.105887651443481445e+00 2.000000000000000000e+00 4.000000000000000000e+00 2.172039947509765625e+02 9.750000000000000000e+00 5.925000000000000000e+01
6.600000000000000000e+01 9.424615384615384528e+02 4.507898559570312500e+02 3.050079345703125000e+00 0.000000000000000000e+00 0.000000000000000000e+00 2.241564453125000000e+03 2.131041049957275391e+00 2.000000000000000000e+00 4.000000000000000000e+00 1.630416259765625000e+02 1.175000000000000000e+01 5.925000000000000000e+01
5.900000000000000000e+01 8.801923076923073950e+02 4.028358154296875000e+02 3.098754882812500000e+00 0.000000000000000000e+00 0.000000000000000000e+00 2.281532470703125000e+03 2.109187364578247070e+00 2.000000000000000000e+00 4.000000000000000000e+00 1.321660614013671875e+02 1.225000000000000000e+01 5.925000000000000000e+01
2.000000000000000000e+01 8.176307692307691468e+02 3.401541137695312500e+02 3.147430419921875000e+00 0.000000000000000000e+00 0.000000000000000000e+00 2.321500732421875000e+03 2.126459121704101562e+00 2.000000000000000000e+00 3.000000000000000000e+00 1.024884262084960938e+02 1.275000000000000000e+01 5.925000000000000000e+01
5.100000000000000000e+01 6.251000000000000227e+02 2.974948730468750000e+02 5.678985595703125000e+00 0.000000000000000000e+00 0.000000000000000000e+00 2.752588378906250000e+03 2.140149831771850586e+00 8.000000000000000000e+00 4.000000000000000000e+00 4.750080871582031250e+01 1.625000000000000000e+01 5.925000000000000000e+01
4.100000000000000000e+01 5.800846153846155175e+02 2.748897094726562500e+02 6.141967773437500000e+00 0.000000000000000000e+00 0.000000000000000000e+00 2.818602294921875000e+03 2.160204410552978516e+00 8.000000000000000000e+00 3.000000000000000000e+00 5.302629470825195312e+01 1.675000000000000000e+01 5.925000000000000000e+01
9.000000000000000000e+00 6.620923076923081680e+02 3.435034179687500000e+02 4.346588134765625000e+00 0.000000000000000000e+00 0.000000000000000000e+00 2.716641601562500000e+03 3.357616186141967773e+00 8.000000000000000000e+00 1.000000000000000000e+00 5.655167770385742188e+01 2.475000000000000000e+01 5.925000000000000000e+01
5.200000000000000000e+01 6.930230769230772694e+02 3.221638488769531250e+02 3.414123535156250000e+00 0.000000000000000000e+00 0.000000000000000000e+00 2.676901367187500000e+03 3.298578262329101562e+00 8.000000000000000000e+00 4.000000000000000000e+00 8.098859405517578125e+01 2.675000000000000000e+01 5.925000000000000000e+01
5.600000000000000000e+01 6.483923076923076678e+02 3.424339904785156250e+02 3.189544677734375000e+00 0.000000000000000000e+00 2.352941185235977173e-01 2.673612060546875000e+03 2.217002153396606445e+00 5.000000000000000000e+00 4.000000000000000000e+00 3.713372421264648438e+01 2.775000000000000000e+01 5.925000000000000000e+01
4.700000000000000000e+01 6.700000000000001137e+02 3.924505004882812500e+02 3.037963867187500000e+00 0.000000000000000000e+00 1.411764740943908691e+00 2.667274169921875000e+03 2.287372350692749023e+00 5.000000000000000000e+00 4.000000000000000000e+00 4.132478332519531250e+01 2.875000000000000000e+01 5.925000000000000000e+01
6.600000000000000000e+01 6.803692307692308532e+02 3.912260742187500000e+02 2.984069824218750000e+00 0.000000000000000000e+00 8.823529481887817383e-01 2.663190673828125000e+03 2.132539510726928711e+00 5.000000000000000000e+00 4.000000000000000000e+00 9.143480682373046875e+01 2.925000000000000000e+01 5.925000000000000000e+01
5.400000000000000000e+01 6.841692307692303530e+02 3.835482482910156250e+02 2.930206298828125000e+00 0.000000000000000000e+00 2.941176593303680420e-01 2.659107177734375000e+03 2.139490842819213867e+00 5.000000000000000000e+00 4.000000000000000000e+00 1.160232086181640625e+02 2.975000000000000000e+01 5.925000000000000000e+01
5.900000000000000000e+01 6.626692307692309214e+02 3.748656921386718750e+02 2.867492675781250000e+00 0.000000000000000000e+00 2.352941185235977173e-01 2.649114013671875000e+03 2.152955770492553711e+00 5.000000000000000000e+00 4.000000000000000000e+00 8.528015899658203125e+01 3.025000000000000000e+01 5.925000000000000000e+01
5.900000000000000000e+01 6.806461538461537657e+02 3.701458129882812500e+02 2.795989990234375000e+00 0.000000000000000000e+00 2.352941185235977173e-01 2.633211181640625000e+03 2.157593250274658203e+00 5.000000000000000000e+00 4.000000000000000000e+00 6.439749145507812500e+01 3.075000000000000000e+01 5.925000000000000000e+01
6.500000000000000000e+01 6.566384615384614563e+02 3.697155761718750000e+02 2.724487304687500000e+00 0.000000000000000000e+00 5.294117927551269531e-01 2.617308349609375000e+03 2.160390377044677734e+00 5.000000000000000000e+00 4.000000000000000000e+00 5.454676437377929688e+01 3.125000000000000000e+01 5.925000000000000000e+01
4.200000000000000000e+01 6.578230769230769965e+02 3.743753662109375000e+02 2.652984619140625000e+00 0.000000000000000000e+00 4.705882370471954346e-01 2.601405517578125000e+03 2.153425455093383789e+00 5.000000000000000000e+00 3.000000000000000000e+00 4.495304107666015625e+01 3.175000000000000000e+01 5.925000000000000000e+01
4.300000000000000000e+01 6.782846153846154493e+02 3.858969421386718750e+02 2.478363037109375000e+00 0.000000000000000000e+00 2.352941185235977173e-01 2.567530517578125000e+03 2.158447027206420898e+00 5.000000000000000000e+00 3.000000000000000000e+00 4.704290008544921875e+01 3.225000000000000000e+01 5.925000000000000000e+01
2.800000000000000000e+01 6.938384615384613880e+02 3.945895690917968750e+02 2.269378662109375000e+00 0.000000000000000000e+00 5.882352963089942932e-02 2.527664794921875000e+03 2.196025848388671875e+00 5.000000000000000000e+00 3.000000000000000000e+00 6.976240539550781250e+01 3.275000000000000000e+01 5.925000000000000000e+01
1.000000000000000000e+01 1.145592307692307486e+03 6.237656250000000000e+02 2.063293457031250000e+00 9.999999776482582092e-03 0.000000000000000000e+00 1.589417968750000000e+03 1.295000791549682617e+00 2.000000000000000000e+00 1.000000000000000000e+00 1.145734375000000000e+03 7.250000000000000000e+00 5.975000000000000000e+01
1.700000000000000000e+01 9.068692307692306258e+02 5.580494995117187500e+02 1.560302734375000000e+00 0.000000000000000000e+00 0.000000000000000000e+00 1.517031982421875000e+03 1.399147629737854004e+00 2.000000000000000000e+00 1.000000000000000000e+00 1.096147949218750000e+03 7.750000000000000000e+00 5.975000000000000000e+01
1.200000000000000000e+01 8.042846153846149946e+02 4.828257751464843750e+02 1.442932128906250000e+00 0.000000000000000000e+00 0.000000000000000000e+00 1.589395996093750000e+03 1.562691688537597656e+00 2.000000000000000000e+00 1.000000000000000000e+00 1.040684326171875000e+03 8.250000000000000000e+00 5.975000000000000000e+01
1.800000000000000000e+01 9.338307692307691923e+02 4.466434936523437500e+02 1.325561523437500000e+00 0.000000000000000000e+00 0.000000000000000000e+00 1.661759887695312500e+03 1.643184065818786621e+00 2.000000000000000000e+00 1.000000000000000000e+00 8.346495971679687500e+02 8.750000000000000000e+00 5.975000000000000000e+01
2.200000000000000000e+01 9.491230769230763826e+02 4.315982666015625000e+02 1.208190917968750000e+00 0.000000000000000000e+00 0.000000000000000000e+00 1.734123901367187500e+03 1.800094485282897949e+00 2.000000000000000000e+00 3.000000000000000000e+00 6.085256958007812500e+02 9.250000000000000000e+00 5.975000000000000000e+01
5.300000000000000000e+01 1.063100000000000136e+03 4.193547363281250000e+02 1.204162597656250000e+00 0.000000000000000000e+00 0.000000000000000000e+00 1.780917358398437500e+03 1.948499798774719238e+00 2.000000000000000000e+00 4.000000000000000000e+00 2.864670715332031250e+02 9.750000000000000000e+00 5.975000000000000000e+01
4.700000000000000000e+01 8.539153846153848235e+02 4.495711364746093750e+02 1.305389404296875000e+00 0.000000000000000000e+00 0.000000000000000000e+00 1.895727294921875000e+03 2.110547780990600586e+00 2.000000000000000000e+00 4.000000000000000000e+00 1.417038726806640625e+02 1.125000000000000000e+01 5.975000000000000000e+01
5.100000000000000000e+01 8.458384615384619565e+02 4.374701538085937500e+02 1.489288330078125000e+00 0.000000000000000000e+00 0.000000000000000000e+00 1.951083007812500000e+03 2.066071748733520508e+00 2.000000000000000000e+00 4.000000000000000000e+00 2.213293609619140625e+02 1.175000000000000000e+01 5.975000000000000000e+01
1.400000000000000000e+01 8.227307692307688285e+02 4.103155822753906250e+02 1.673217773437500000e+00 0.000000000000000000e+00 0.000000000000000000e+00 2.006438842773437500e+03 2.047440290451049805e+00 2.000000000000000000e+00 1.000000000000000000e+00 1.357560119628906250e+02 1.225000000000000000e+01 5.975000000000000000e+01
2.800000000000000000e+01 8.407384615384621611e+02 3.611687622070312500e+02 1.857147216796875000e+00 0.000000000000000000e+00 0.000000000000000000e+00 2.061794433593750000e+03 2.058076381683349609e+00 2.000000000000000000e+00 3.000000000000000000e+00 2.991950683593750000e+02 1.275000000000000000e+01 5.975000000000000000e+01
2.600000000000000000e+01 7.995230769230767010e+02 3.001259155273437500e+02 2.105529785156250000e+00 0.000000000000000000e+00 0.000000000000000000e+00 2.122490478515625000e+03 2.067430019378662109e+00 2.000000000000000000e+00 3.000000000000000000e+00 1.110279769897460938e+02 1.325000000000000000e+01 5.975000000000000000e+01
5.800000000000000000e+01 7.898384615384613880e+02 2.738620605468750000e+02 2.547424316406250000e+00 0.000000000000000000e+00 0.000000000000000000e+00 2.199206787109375000e+03 2.047230243682861328e+00 2.000000000000000000e+00 4.000000000000000000e+00 2.711404724121093750e+02 1.375000000000000000e+01 5.975000000000000000e+01
5.600000000000000000e+01 7.920384615384608651e+02 2.859795837402343750e+02 2.989288330078125000e+00 0.000000000000000000e+00 0.000000000000000000e+00 2.275922851562500000e+03 2.021943569183349609e+00 2.000000000000000000e+00 4.000000000000000000e+00 2.262401123046875000e+02 1.425000000000000000e+01 5.975000000000000000e+01
5.200000000000000000e+01 7.930615384615388166e+02 3.106563415527343750e+02 3.431182861328125000e+00 0.000000000000000000e+00 0.000000000000000000e+00 2.352639160156250000e+03 2.010381460189819336e+00 2.000000000000000000e+00 4.000000000000000000e+00 1.921233520507812500e+02 1.475000000000000000e+01 5.975000000000000000e+01
5.400000000000000000e+01 7.614230769230770193e+02 3.149978637695312500e+02 3.898101806640625000e+00 0.000000000000000000e+00 0.000000000000000000e+00 2.432625488281250000e+03 2.006655454635620117e+00 2.000000000000000000e+00 4.000000000000000000e+00 1.997443389892578125e+02 1.525000000000000000e+01 5.975000000000000000e+01
4.900000000000000000e+01 6.755076923076923094e+02 2.985695800781250000e+02 4.390045166015625000e+00 0.000000000000000000e+00 0.000000000000000000e+00 2.515881591796875000e+03 2.030035734176635742e+00 2.000000000000000000e+00 4.000000000000000000e+00 1.199128570556640625e+02 1.575000000000000000e+01 5.975000000000000000e+01
5.800000000000000000e+01 6.084000000000000909e+02 2.754921875000000000e+02 4.882019042968750000e+00 0.000000000000000000e+00 0.000000000000000000e+00 2.599137695312500000e+03 2.069529056549072266e+00 2.000000000000000000e+00 4.000000000000000000e+00 9.389636993408203125e+01 1.625000000000000000e+01 5.975000000000000000e+01
1.100000000000000000e+01 5.654615384615383391e+02 2.519029693603515625e+02 5.373962402343750000e+00 0.000000000000000000e+00 0.000000000000000000e+00 2.682394042968750000e+03 5.512807965278625488e-01 1.100000000000000000e+01 1.000000000000000000e+00 5.451675415039062500e+01 1.675000000000000000e+01 5.975000000000000000e+01
1.500000000000000000e+01 5.084769230769230717e+02 1.970575561523437500e+02 6.568420410156250000e+00 0.000000000000000000e+00 0.000000000000000000e+00 2.803108398437500000e+03 2.163510799407958984e+00 8.000000000000000000e+00 1.000000000000000000e+00 3.629520797729492188e+01 1.825000000000000000e+01 5.975000000000000000e+01
5.800000000000000000e+01 6.774153846153844825e+02 3.754492492675781250e+02 2.647338867187500000e+00 0.000000000000000000e+00 0.000000000000000000e+00 2.593586669921875000e+03 2.138597011566162109e+00 5.000000000000000000e+00 4.000000000000000000e+00 9.912406921386718750e+01 2.975000000000000000e+01 5.975000000000000000e+01
3.000000000000000000e+01 6.669230769230767919e+02 3.690770568847656250e+02 2.509277343750000000e+00 0.000000000000000000e+00 2.941176593303680420e-01 2.567660400390625000e+03 2.144701480865478516e+00 5.000000000000000000e+00 3.000000000000000000e+00 5.713366317749023438e+01 3.125000000000000000e+01 5.975000000000000000e+01
4.800000000000000000e+01 6.638769230769230489e+02 3.943950500488281250e+02 2.301483154296875000e+00 0.000000000000000000e+00 5.882352963089942932e-02 2.528597900390625000e+03 2.340885162353515625e+00 5.000000000000000000e+00 4.000000000000000000e+00 3.581330108642578125e+01 3.225000000000000000e+01 5.975000000000000000e+01
1.000000000000000000e+01 1.402069230769231353e+03 5.377600708007812500e+02 1.168121337890625000e+00 9.999999776482582092e-03 0.000000000000000000e+00 1.356714355468750000e+03 1.350920319557189941e+00 1.200000000000000000e+01 1.000000000000000000e+00 1.347171997070312500e+03 7.250000000000000000e+00 6.025000000000000000e+01
2.900000000000000000e+01 7.106307692307698289e+02 4.025416870117187500e+02 2.193298339843750000e-01 0.000000000000000000e+00 0.000000000000000000e+00 1.414070800781250000e+03 1.729251027107238770e+00 2.000000000000000000e+00 3.000000000000000000e+00 9.375364379882812500e+02 8.750000000000000000e+00 6.025000000000000000e+01
2.700000000000000000e+01 8.388461538461540385e+02 3.986051330566406250e+02 5.007934570312500000e-02 0.000000000000000000e+00 0.000000000000000000e+00 1.487274291992187500e+03 1.787743806838989258e+00 2.000000000000000000e+00 3.000000000000000000e+00 6.107962036132812500e+02 9.250000000000000000e+00 6.025000000000000000e+01
5.500000000000000000e+01 9.062846153846151083e+02 4.543337402343750000e+02 1.879882812500000000e-02 0.000000000000000000e+00 0.000000000000000000e+00 1.586642578125000000e+03 1.939349770545959473e+00 2.000000000000000000e+00 4.000000000000000000e+00 2.884866333007812500e+02 1.025000000000000000e+01 6.025000000000000000e+01
6.500000000000000000e+01 9.264230769230770193e+02 4.732276306152343750e+02 2.508544921875000000e-02 0.000000000000000000e+00 0.000000000000000000e+00 1.632966796875000000e+03 1.974570751190185547e+00 2.000000000000000000e+00 4.000000000000000000e+00 4.989935913085937500e+02 1.075000000000000000e+01 6.025000000000000000e+01
5.600000000000000000e+01 7.573538461538462343e+02 4.702361450195312500e+02 3.137207031250000000e-02 0.000000000000000000e+00 0.000000000000000000e+00 1.679291015625000000e+03 1.982906818389892578e+00 2.000000000000000000e+00 4.000000000000000000e+00 2.433011474609375000e+02 1.125000000000000000e+01 6.025000000000000000e+01
5.300000000000000000e+01 7.947461538461541295e+02 4.382902221679687500e+02 5.245971679687500000e-01 0.000000000000000000e+00 2.352941185235977173e-01 1.797987304687500000e+03 1.961433649063110352e+00 2.000000000000000000e+00 4.000000000000000000e+00 3.336150512695312500e+02 1.225000000000000000e+01 6.025000000000000000e+01
2.700000000000000000e+01 8.799153846153848235e+02 4.182020263671875000e+02 7.712097167968750000e-01 0.000000000000000000e+00 0.000000000000000000e+00 1.857335327148437500e+03 1.963683605194091797e+00 2.000000000000000000e+00 3.000000000000000000e+00 2.390892639160156250e+02 1.275000000000000000e+01 6.025000000000000000e+01
2.900000000000000000e+01 8.318461538461541522e+02 3.882193908691406250e+02 1.078826904296875000e+00 0.000000000000000000e+00 0.000000000000000000e+00 1.922931152343750000e+03 1.964176177978515625e+00 2.000000000000000000e+00 3.000000000000000000e+00 2.995375671386718750e+02 1.325000000000000000e+01 6.025000000000000000e+01
5.400000000000000000e+01 8.082076923076919002e+02 3.639262390136718750e+02 1.569519042968750000e+00 0.000000000000000000e+00 0.000000000000000000e+00 2.007269653320312500e+03 1.947927355766296387e+00 2.000000000000000000e+00 4.000000000000000000e+00 3.259492797851562500e+02 1.375000000000000000e+01 6.025000000000000000e+01
5.000000000000000000e+01 7.636076923076925596e+02 3.040294189453125000e+02 2.550872802734375000e+00 0.000000000000000000e+00 0.000000000000000000e+00 2.175946777343750000e+03 1.919586181640625000e+00 2.000000000000000000e+00 4.000000000000000000e+00 2.823778686523437500e+02 1.475000000000000000e+01 6.025000000000000000e+01
6.500000000000000000e+01 7.448692307692309669e+02 2.570710754394531250e+02 3.054351806640625000e+00 0.000000000000000000e+00 0.000000000000000000e+00 2.264038818359375000e+03 1.923063755035400391e+00 2.000000000000000000e+00 4.000000000000000000e+00 2.082797088623046875e+02 1.525000000000000000e+01 6.025000000000000000e+01
5.300000000000000000e+01 6.679000000000000909e+02 2.250962982177734375e+02 3.570648193359375000e+00 0.000000000000000000e+00 0.000000000000000000e+00 2.355883789062500000e+03 1.938882350921630859e+00 2.000000000000000000e+00 4.000000000000000000e+00 2.002982788085937500e+02 1.575000000000000000e+01 6.025000000000000000e+01
6.100000000000000000e+01 6.535384615384615472e+02 2.240446166992187500e+02 4.086944580078125000e+00 0.000000000000000000e+00 0.000000000000000000e+00 2.447729003906250000e+03 1.965567350387573242e+00 2.000000000000000000e+00 4.000000000000000000e+00 1.310248870849609375e+02 1.625000000000000000e+01 6.025000000000000000e+01
6.100000000000000000e+01 6.408461538461540385e+02 2.430483551025390625e+02 4.603210449218750000e+00 0.000000000000000000e+00 0.000000000000000000e+00 2.539574218750000000e+03 2.005478620529174805e+00 2.000000000000000000e+00 4.000000000000000000e+00 3.912432861328125000e+01 1.675000000000000000e+01 6.025000000000000000e+01
5.900000000000000000e+01 5.937692307692306031e+02 2.502728271484375000e+02 5.084625244140625000e+00 0.000000000000000000e+00 0.000000000000000000e+00 2.595008300781250000e+03 2.070986986160278320e+00 2.000000000000000000e+00 4.000000000000000000e+00 5.035277175903320312e+01 1.725000000000000000e+01 6.025000000000000000e+01
4.300000000000000000e+01 5.582153846153847780e+02 2.332827606201171875e+02 5.554443359375000000e+00 0.000000000000000000e+00 0.000000000000000000e+00 2.638305175781250000e+03 2.118707418441772461e+00 8.000000000000000000e+00 3.000000000000000000e+00 2.888443183898925781e+01 1.775000000000000000e+01 6.025000000000000000e+01
2.300000000000000000e+01 6.498230769230769965e+02 3.151543579101562500e+02 4.196014404296875000e+00 0.000000000000000000e+00 0.000000000000000000e+00 2.645354248046875000e+03 2.076069593429565430e+00 2.000000000000000000e+00 3.000000000000000000e+00 6.495639801025390625e+01 2.425000000000000000e+01 6.025000000000000000e+01
5.800000000000000000e+01 7.074000000000002046e+02 3.633676757812500000e+02 2.130554199218750000e+00 0.000000000000000000e+00 2.941176593303680420e-01 2.499915771484375000e+03 2.130846738815307617e+00 2.000000000000000000e+00 4.000000000000000000e+00 8.376016998291015625e+01 3.025000000000000000e+01 6.025000000000000000e+01
2.000000000000000000e+00 7.667923076923077588e+02 4.706711120605468750e+02 1.565551757812500000e-01 9.999999776482582092e-03 0.000000000000000000e+00 1.276550170898437500e+03 1.508590340614318848e+00 2.000000000000000000e+00 1.000000000000000000e+00 1.313272949218750000e+03 8.250000000000000000e+00 6.075000000000000000e+01
4.500000000000000000e+01 6.816230769230769511e+02 4.194825134277343750e+02 -1.364135742187500000e-01 0.000000000000000000e+00 0.000000000000000000e+00 1.318360839843750000e+03 1.691342592239379883e+00 2.000000000000000000e+00 4.000000000000000000e+00 8.360084838867187500e+02 8.750000000000000000e+00 6.075000000000000000e+01
1.400000000000000000e+01 7.143230769230769965e+02 3.511197509765625000e+02 -4.293518066406250000e-01 0.000000000000000000e+00 0.000000000000000000e+00 1.360171630859375000e+03 1.734620213508605957e+00 2.000000000000000000e+00 1.000000000000000000e+00 1.065345581054687500e+03 9.250000000000000000e+00 6.075000000000000000e+01
4.100000000000000000e+01 8.296000000000001364e+02 4.051655883789062500e+02 -5.671386718750000000e-01 0.000000000000000000e+00 0.000000000000000000e+00 1.406757690429687500e+03 1.790386199951171875e+00 2.000000000000000000e+00 3.000000000000000000e+00 5.458719482421875000e+02 9.750000000000000000e+00 6.075000000000000000e+01
3.500000000000000000e+01 8.207769230769225715e+02 4.499237060546875000e+02 -6.532287597656250000e-01 0.000000000000000000e+00 0.000000000000000000e+00 1.454935546875000000e+03 1.867749571800231934e+00 2.000000000000000000e+00 3.000000000000000000e+00 2.672482299804687500e+02 1.025000000000000000e+01 6.075000000000000000e+01
6.000000000000000000e+01 7.398769230769231626e+02 4.573455200195312500e+02 -5.877990722656250000e-01 0.000000000000000000e+00 0.000000000000000000e+00 1.603363403320312500e+03 1.925989985466003418e+00 2.000000000000000000e+00 4.000000000000000000e+00 2.152486724853515625e+02 1.175000000000000000e+01 6.075000000000000000e+01
2.600000000000000000e+01 7.652461538461536747e+02 4.428571166992187500e+02 -3.502197265625000000e-01 0.000000000000000000e+00 2.941176593303680420e-01 1.655435668945312500e+03 1.903368353843688965e+00 2.000000000000000000e+00 3.000000000000000000e+00 2.893472290039062500e+02 1.225000000000000000e+01 6.075000000000000000e+01
6.400000000000000000e+01 7.986307692307692605e+02 4.374031066894531250e+02 -1.126403808593750000e-01 0.000000000000000000e+00 0.000000000000000000e+00 1.707507812500000000e+03 1.906236529350280762e+00 2.000000000000000000e+00 4.000000000000000000e+00 3.198893127441406250e+02 1.275000000000000000e+01 6.075000000000000000e+01
3.600000000000000000e+01 7.534076923076924004e+02 4.273280944824218750e+02 1.914062500000000000e-01 0.000000000000000000e+00 0.000000000000000000e+00 1.768034301757812500e+03 1.919819116592407227e+00 2.000000000000000000e+00 3.000000000000000000e+00 4.648047790527343750e+02 1.325000000000000000e+01 6.075000000000000000e+01
4.800000000000000000e+01 7.264153846153844825e+02 4.162239074707031250e+02 6.949157714843750000e-01 0.000000000000000000e+00 0.000000000000000000e+00 1.853923583984375000e+03 1.916495203971862793e+00 2.000000000000000000e+00 4.000000000000000000e+00 3.820484619140625000e+02 1.375000000000000000e+01 6.075000000000000000e+01
6.500000000000000000e+01 6.851384615384619110e+02 3.294452819824218750e+02 1.701965332031250000e+00 0.000000000000000000e+00 0.000000000000000000e+00 2.025701904296875000e+03 1.899760246276855469e+00 2.000000000000000000e+00 4.000000000000000000e+00 2.401493682861328125e+02 1.475000000000000000e+01 6.075000000000000000e+01
5.400000000000000000e+01 6.733230769230768828e+02 2.629872741699218750e+02 2.221740722656250000e+00 0.000000000000000000e+00 0.000000000000000000e+00 2.114585205078125000e+03 1.894993305206298828e+00 2.000000000000000000e+00 4.000000000000000000e+00 2.471613006591796875e+02 1.525000000000000000e+01 6.075000000000000000e+01
6.100000000000000000e+01 6.814307692307694424e+02 2.315133972167968750e+02 2.757720947265625000e+00 0.000000000000000000e+00 0.000000000000000000e+00 2.206462402343750000e+03 1.894493341445922852e+00 2.000000000000000000e+00 4.000000000000000000e+00 1.839610137939453125e+02 1.575000000000000000e+01 6.075000000000000000e+01
4.100000000000000000e+01 6.633230769230765418e+02 2.410815277099609375e+02 3.293731689453125000e+00 0.000000000000000000e+00 0.000000000000000000e+00 2.298339355468750000e+03 1.926267027854919434e+00 2.000000000000000000e+00 3.000000000000000000e+00 2.604458618164062500e+02 1.625000000000000000e+01 6.075000000000000000e+01
5.600000000000000000e+01 6.433692307692310806e+02 2.720724792480468750e+02 3.829742431640625000e+00 0.000000000000000000e+00 0.000000000000000000e+00 2.390216552734375000e+03 1.983840584754943848e+00 2.000000000000000000e+00 4.000000000000000000e+00 9.103514099121093750e+01 1.675000000000000000e+01 6.075000000000000000e+01
5.300000000000000000e+01 6.305769230769232081e+02 3.301413269042968750e+02 5.221221923828125000e+00 0.000000000000000000e+00 0.000000000000000000e+00 2.599309814453125000e+03 2.098397970199584961e+00 2.000000000000000000e+00 4.000000000000000000e+00 7.198351287841796875e+01 2.225000000000000000e+01 6.075000000000000000e+01
6.100000000000000000e+01 6.085000000000001137e+02 3.395223388671875000e+02 4.896148681640625000e+00 0.000000000000000000e+00 0.000000000000000000e+00 2.590909667968750000e+03 2.357576847076416016e+00 1.100000000000000000e+01 4.000000000000000000e+00 8.107170867919921875e+01 2.275000000000000000e+01 6.075000000000000000e+01
5.000000000000000000e+01 5.879923076923079179e+02 3.466509094238281250e+02 4.519561767578125000e+00 0.000000000000000000e+00 0.000000000000000000e+00 2.586003906250000000e+03 2.783774375915527344e+00 1.100000000000000000e+01 4.000000000000000000e+00 9.083979034423828125e+01 2.325000000000000000e+01 6.075000000000000000e+01
5.500000000000000000e+01 5.866461538461539931e+02 3.512007446289062500e+02 4.142974853515625000e+00 0.000000000000000000e+00 0.000000000000000000e+00 2.581098144531250000e+03 2.613608121871948242e+00 2.000000000000000000e+00 4.000000000000000000e+00 1.355343475341796875e+02 2.375000000000000000e+01 6.075000000000000000e+01
5.400000000000000000e+01 5.846153846153847553e+02 3.489800109863281250e+02 3.766387939453125000e+00 0.000000000000000000e+00 0.000000000000000000e+00 2.576192382812500000e+03 2.074243783950805664e+00 2.000000000000000000e+00 4.000000000000000000e+00 1.195422821044921875e+02 2.425000000000000000e+01 6.075000000000000000e+01
9.000000000000000000e+00 6.142307692307691696e+02 3.474930725097656250e+02 3.135192871093750000e+00 0.000000000000000000e+00 0.000000000000000000e+00 2.534308349609375000e+03 2.084190607070922852e+00 4.000000000000000000e+00 1.000000000000000000e+00 9.730092620849609375e+01 2.525000000000000000e+01 6.075000000000000000e+01
4.100000000000000000e+01 6.583307692307693060e+02 3.539420166015625000e+02 2.521453857421875000e+00 0.000000000000000000e+00 0.000000000000000000e+00 2.487842773437500000e+03 2.091550111770629883e+00 1.100000000000000000e+01 3.000000000000000000e+00 5.189315795898437500e+01 2.625000000000000000e+01 6.075000000000000000e+01
4.800000000000000000e+01 5.986692307692308077e+02 3.657073669433593750e+02 1.955108642578125000e+00 0.000000000000000000e+00 0.000000000000000000e+00 2.444745117187500000e+03 2.104456424713134766e+00 2.000000000000000000e+00 4.000000000000000000e+00 5.175040435791015625e+01 2.775000000000000000e+01 6.075000000000000000e+01
5.300000000000000000e+01 6.025384615384612061e+02 3.830852966308593750e+02 1.615386962890625000e+00 0.000000000000000000e+00 2.941176593303680420e-01 2.410203857421875000e+03 2.938478708267211914e+00 2.000000000000000000e+00 4.000000000000000000e+00 3.167798042297363281e+01 2.925000000000000000e+01 6.075000000000000000e+01
5.400000000000000000e+01 6.218769230769230489e+02 3.775279235839843750e+02 1.527343750000000000e+00 0.000000000000000000e+00 0.000000000000000000e+00 2.399640869140625000e+03 2.273829936981201172e+00 2.000000000000000000e+00 4.000000000000000000e+00 1.681449508666992188e+01 2.975000000000000000e+01 6.075000000000000000e+01
8.000000000000000000e+00 1.599507692307691968e+03 6.047651367187500000e+02 2.472991943359375000e+00 0.000000000000000000e+00 0.000000000000000000e+00 1.630760253906250000e+03 1.390889883041381836e+00 2.000000000000000000e+00 1.000000000000000000e+00 1.026418334960937500e+03 6.750000000000000000e+00 6.125000000000000000e+01
1.000000000000000000e+01 7.222076923076921275e+02 4.713018493652343750e+02 3.412475585937500000e-01 0.000000000000000000e+00 0.000000000000000000e+00 1.201814941406250000e+03 1.298622369766235352e+00 1.200000000000000000e+01 1.000000000000000000e+00 7.606001586914062500e+02 7.750000000000000000e+00 6.125000000000000000e+01
1.000000000000000000e+00 9.882923076923076451e+02 4.828837280273437500e+02 -7.543945312500000000e-02 1.133814230561256409e-01 0.000000000000000000e+00 1.212232910156250000e+03 1.146736621856689453e+00 1.200000000000000000e+01 1.000000000000000000e+00 1.166664672851562500e+03 8.250000000000000000e+00 6.125000000000000000e+01
1.000000000000000000e+01 6.798230769230766555e+02 3.542939453125000000e+02 -9.088134765625000000e-01 9.999999776482582092e-03 0.000000000000000000e+00 1.233068847656250000e+03 1.451114177703857422e+00 2.000000000000000000e+00 1.000000000000000000e+00 1.037803710937500000e+03 9.250000000000000000e+00 6.125000000000000000e+01
1.900000000000000000e+01 7.110307692307690104e+02 3.787831726074218750e+02 -1.146789550781250000e+00 0.000000000000000000e+00 0.000000000000000000e+00 1.273197021484375000e+03 1.609922409057617188e+00 2.000000000000000000e+00 1.000000000000000000e+00 9.038737792968750000e+02 9.750000000000000000e+00 6.125000000000000000e+01
5.800000000000000000e+01 7.171153846153849827e+02 4.253820800781250000e+02 -1.682067871093750000e+00 0.000000000000000000e+00 0.000000000000000000e+00 1.423291503906250000e+03 1.674708604812622070e+00 2.000000000000000000e+00 4.000000000000000000e+00 4.350268249511718750e+02 1.125000000000000000e+01 6.125000000000000000e+01
6.000000000000000000e+01 7.362999999999998408e+02 3.838757324218750000e+02 -1.225036621093750000e+00 0.000000000000000000e+00 0.000000000000000000e+00 1.512884033203125000e+03 1.682761788368225098e+00 2.000000000000000000e+00 4.000000000000000000e+00 5.182606201171875000e+02 1.225000000000000000e+01 6.125000000000000000e+01
5.800000000000000000e+01 7.762769230769234809e+02 3.770252380371093750e+02 -9.964904785156250000e-01 0.000000000000000000e+00 0.000000000000000000e+00 1.557680419921875000e+03 1.693429231643676758e+00 2.000000000000000000e+00 4.000000000000000000e+00 4.963398742675781250e+02 1.275000000000000000e+01 6.125000000000000000e+01
4.900000000000000000e+01 7.325461538461536293e+02 3.787646789550781250e+02 -6.960144042968750000e-01 0.000000000000000000e+00 0.000000000000000000e+00 1.613137573242187500e+03 1.752790451049804688e+00 2.000000000000000000e+00 4.000000000000000000e+00 5.418764648437500000e+02 1.325000000000000000e+01 6.125000000000000000e+01
5.600000000000000000e+01 7.332615384615381799e+02 3.872948608398437500e+02 -1.796569824218750000e-01 0.000000000000000000e+00 0.000000000000000000e+00 1.700577392578125000e+03 1.795949935913085938e+00 2.000000000000000000e+00 4.000000000000000000e+00 4.053057556152343750e+02 1.375000000000000000e+01 6.125000000000000000e+01
5.600000000000000000e+01 7.395538461538460524e+02 3.797622985839843750e+02 3.367004394531250000e-01 0.000000000000000000e+00 0.000000000000000000e+00 1.788017211914062500e+03 1.807876586914062500e+00 2.000000000000000000e+00 4.000000000000000000e+00 3.680341186523437500e+02 1.425000000000000000e+01 6.125000000000000000e+01
5.700000000000000000e+01 6.915230769230771557e+02 3.546225280761718750e+02 8.530578613281250000e-01 0.000000000000000000e+00 0.000000000000000000e+00 1.875457031250000000e+03 1.822224497795104980e+00 2.000000000000000000e+00 4.000000000000000000e+00 3.550569763183593750e+02 1.475000000000000000e+01 6.125000000000000000e+01
4.200000000000000000e+01 6.801307692307693742e+02 3.272793579101562500e+02 1.389099121093750000e+00 0.000000000000000000e+00 0.000000000000000000e+00 1.965131469726562500e+03 1.827853798866271973e+00 2.000000000000000000e+00 3.000000000000000000e+00 3.707372436523437500e+02 1.525000000000000000e+01 6.125000000000000000e+01
6.700000000000000000e+01 7.084076923076924004e+02 3.137272644042968750e+02 1.944824218750000000e+00 0.000000000000000000e+00 0.000000000000000000e+00 2.057040771484375000e+03 1.824686527252197266e+00 2.000000000000000000e+00 4.000000000000000000e+00 2.609703063964843750e+02 1.575000000000000000e+01 6.125000000000000000e+01
8.000000000000000000e+00 6.016692307692306940e+02 3.179450683593750000e+02 4.672332763671875000e+00 0.000000000000000000e+00 0.000000000000000000e+00 2.558137695312500000e+03 2.066497087478637695e+00 2.000000000000000000e+00 1.000000000000000000e+00 5.045358276367187500e+01 2.225000000000000000e+01 6.125000000000000000e+01
3.000000000000000000e+01 6.139538461538460297e+02 3.267754211425781250e+02 4.349761962890625000e+00 0.000000000000000000e+00 0.000000000000000000e+00 2.554077636718750000e+03 2.055608510971069336e+00 2.000000000000000000e+00 3.000000000000000000e+00 7.426898956298828125e+01 2.275000000000000000e+01 6.125000000000000000e+01
5.400000000000000000e+01 6.063615384615389985e+02 3.284058227539062500e+02 4.012084960937500000e+00 0.000000000000000000e+00 0.000000000000000000e+00 2.538395263671875000e+03 2.038638830184936523e+00 1.100000000000000000e+01 4.000000000000000000e+00 1.183589706420898438e+02 2.325000000000000000e+01 6.125000000000000000e+01
3.100000000000000000e+01 5.704076923076920593e+02 3.296809082031250000e+02 3.674407958984375000e+00 0.000000000000000000e+00 0.000000000000000000e+00 2.522712890625000000e+03 2.032586097717285156e+00 2.000000000000000000e+00 3.000000000000000000e+00 8.944499969482421875e+01 2.375000000000000000e+01 6.125000000000000000e+01
5.900000000000000000e+01 5.511076923076923322e+02 3.331925354003906250e+02 3.336730957031250000e+00 0.000000000000000000e+00 0.000000000000000000e+00 2.507030517578125000e+03 2.034439325332641602e+00 2.000000000000000000e+00 4.000000000000000000e+00 1.093099136352539062e+02 2.425000000000000000e+01 6.125000000000000000e+01
6.000000000000000000e+01 5.709692307692306485e+02 3.381329040527343750e+02 3.011596679687500000e+00 0.000000000000000000e+00 0.000000000000000000e+00 2.483585449218750000e+03 2.035087108612060547e+00 2.000000000000000000e+00 4.000000000000000000e+00 1.186377487182617188e+02 2.475000000000000000e+01 6.125000000000000000e+01
5.900000000000000000e+01 5.900923076923077133e+02 3.450264587402343750e+02 2.690643310546875000e+00 0.000000000000000000e+00 0.000000000000000000e+00 2.457552978515625000e+03 2.037586927413940430e+00 2.000000000000000000e+00 4.000000000000000000e+00 1.583281555175781250e+02 2.525000000000000000e+01 6.125000000000000000e+01
4.600000000000000000e+01 6.250076923076923094e+02 3.590567321777343750e+02 2.048736572265625000e+00 0.000000000000000000e+00 0.000000000000000000e+00 2.405487792968750000e+03 2.048061609268188477e+00 2.000000000000000000e+00 4.000000000000000000e+00 9.357867431640625000e+01 2.625000000000000000e+01 6.125000000000000000e+01
5.000000000000000000e+01 6.167615384615384073e+02 3.703807067871093750e+02 1.829376220703125000e+00 0.000000000000000000e+00 0.000000000000000000e+00 2.386642822265625000e+03 2.052661180496215820e+00 2.000000000000000000e+00 4.000000000000000000e+00 9.716799163818359375e+01 2.675000000000000000e+01 6.125000000000000000e+01
2.100000000000000000e+01 6.114846153846153811e+02 3.736478271484375000e+02 1.610015869140625000e+00 0.000000000000000000e+00 0.000000000000000000e+00 2.367797607421875000e+03 2.058884382247924805e+00 2.000000000000000000e+00 3.000000000000000000e+00 8.234208679199218750e+01 2.725000000000000000e+01 6.125000000000000000e+01
4.900000000000000000e+01 5.971999999999999318e+02 3.727662658691406250e+02 9.834899902343750000e-01 0.000000000000000000e+00 0.000000000000000000e+00 2.305356445312500000e+03 2.085351705551147461e+00 2.000000000000000000e+00 4.000000000000000000e+00 9.300743103027343750e+01 2.925000000000000000e+01 6.125000000000000000e+01
3.700000000000000000e+01 2.184684615384614972e+03 6.179135742187500000e+02 3.997467041015625000e+00 0.000000000000000000e+00 0.000000000000000000e+00 1.950633056640625000e+03 1.478797793388366699e+00 2.000000000000000000e+00 3.000000000000000000e+00 5.062337951660156250e+02 6.250000000000000000e+00 6.175000000000000000e+01
3.000000000000000000e+00 1.049338461538461388e+03 4.135826721191406250e+02 -3.074340820312500000e-01 1.779784560203552246e-01 0.000000000000000000e+00 1.147915771484375000e+03 1.035675287246704102e+00 1.200000000000000000e+01 1.000000000000000000e+00 1.383807617187500000e+03 8.250000000000000000e+00 6.175000000000000000e+01
4.900000000000000000e+01 6.057692307692306031e+02 3.193649902343750000e+02 -1.388244628906250000e+00 0.000000000000000000e+00 0.000000000000000000e+00 1.105966186523437500e+03 1.432986974716186523e+00 2.000000000000000000e+00 4.000000000000000000e+00 8.013843383789062500e+02 9.250000000000000000e+00 6.175000000000000000e+01
1.700000000000000000e+01 5.479000000000000909e+02 3.279258422851562500e+02 -1.726440429687500000e+00 0.000000000000000000e+00 0.000000000000000000e+00 1.139636352539062500e+03 1.312344551086425781e+00 2.000000000000000000e+00 1.000000000000000000e+00 1.012372802734375000e+03 9.750000000000000000e+00 6.175000000000000000e+01
1.300000000000000000e+01 5.698153846153844597e+02 3.503503112792968750e+02 -2.268005371093750000e+00 0.000000000000000000e+00 0.000000000000000000e+00 1.243406616210937500e+03 1.578550219535827637e+00 2.000000000000000000e+00 1.000000000000000000e+00 5.038603820800781250e+02 1.075000000000000000e+01 6.175000000000000000e+01
2.100000000000000000e+01 6.035769230769229807e+02 3.186211853027343750e+02 -2.538787841796875000e+00 0.000000000000000000e+00 0.000000000000000000e+00 1.295291625976562500e+03 1.607567071914672852e+00 2.000000000000000000e+00 3.000000000000000000e+00 6.754811401367187500e+02 1.125000000000000000e+01 6.175000000000000000e+01
2.200000000000000000e+01 6.271615384615380435e+02 2.283209838867187500e+02 -2.099822998046875000e+00 0.000000000000000000e+00 0.000000000000000000e+00 1.370332519531250000e+03 1.644430160522460938e+00 2.000000000000000000e+00 3.000000000000000000e+00 7.554130249023437500e+02 1.225000000000000000e+01 6.175000000000000000e+01
1.600000000000000000e+01 7.000923076923074859e+02 2.466462554931640625e+02 -1.880340576171875000e+00 0.000000000000000000e+00 0.000000000000000000e+00 1.407852905273437500e+03 1.670190572738647461e+00 2.000000000000000000e+00 1.000000000000000000e+00 6.230169677734375000e+02 1.275000000000000000e+01 6.175000000000000000e+01
3.100000000000000000e+01 6.740076923076928779e+02 2.825025634765625000e+02 -1.583435058593750000e+00 0.000000000000000000e+00 0.000000000000000000e+00 1.458240722656250000e+03 1.690289974212646484e+00 2.000000000000000000e+00 3.000000000000000000e+00 5.118907470703125000e+02 1.325000000000000000e+01 6.175000000000000000e+01
3.300000000000000000e+01 7.345384615384615472e+02 3.226212158203125000e+02 -1.054260253906250000e+00 0.000000000000000000e+00 0.000000000000000000e+00 1.547231201171875000e+03 1.706537127494812012e+00 2.000000000000000000e+00 3.000000000000000000e+00 6.462561035156250000e+02 1.375000000000000000e+01 6.175000000000000000e+01
2.100000000000000000e+01 7.016769230769230035e+02 3.410688476562500000e+02 -5.250549316406250000e-01 0.000000000000000000e+00 0.000000000000000000e+00 1.636221679687500000e+03 1.725244641304016113e+00 2.000000000000000000e+00 3.000000000000000000e+00 4.885261840820312500e+02 1.425000000000000000e+01 6.175000000000000000e+01
5.100000000000000000e+01 7.026461538461537657e+02 3.448538208007812500e+02 4.150390625000000000e-03 0.000000000000000000e+00 0.000000000000000000e+00 1.725212036132812500e+03 1.749185681343078613e+00 2.000000000000000000e+00 4.000000000000000000e+00 4.803435058593750000e+02 1.475000000000000000e+01 6.175000000000000000e+01
4.600000000000000000e+01 6.728307692307691923e+02 3.431462707519531250e+02 5.564575195312500000e-01 0.000000000000000000e+00 0.000000000000000000e+00 1.815677856445312500e+03 1.779925704002380371e+00 2.000000000000000000e+00 4.000000000000000000e+00 3.534094238281250000e+02 1.525000000000000000e+01 6.175000000000000000e+01
6.500000000000000000e+01 6.820384615384615472e+02 3.390154113769531250e+02 1.131896972656250000e+00 0.000000000000000000e+00 0.000000000000000000e+00 1.907619018554687500e+03 1.794028878211975098e+00 2.000000000000000000e+00 4.000000000000000000e+00 2.446892242431640625e+02 1.575000000000000000e+01 6.175000000000000000e+01
6.000000000000000000e+01 7.009461538461540613e+02 3.262838745117187500e+02 1.707336425781250000e+00 0.000000000000000000e+00 0.000000000000000000e+00 1.999560302734375000e+03 1.806772470474243164e+00 2.000000000000000000e+00 4.000000000000000000e+00 1.812867736816406250e+02 1.625000000000000000e+01 6.175000000000000000e+01
6.100000000000000000e+01 6.644769230769231854e+02 3.022207031250000000e+02 2.282775878906250000e+00 0.000000000000000000e+00 0.000000000000000000e+00 2.091501464843750000e+03 1.862843871116638184e+00 2.000000000000000000e+00 4.000000000000000000e+00 1.446346282958984375e+02 1.675000000000000000e+01 6.175000000000000000e+01
1.900000000000000000e+01 5.893153846153848008e+02 3.389425964355468750e+02 4.123474121093750000e+00 0.000000000000000000e+00 0.000000000000000000e+00 2.516965332031250000e+03 2.038693428039550781e+00 2.000000000000000000e+00 1.000000000000000000e+00 8.407422637939453125e+01 2.225000000000000000e+01 6.175000000000000000e+01
2.300000000000000000e+01 6.171999999999999318e+02 3.442883911132812500e+02 3.803375244140625000e+00 0.000000000000000000e+00 2.941176593303680420e-01 2.517245605468750000e+03 2.030507802963256836e+00 2.000000000000000000e+00 3.000000000000000000e+00 1.274507675170898438e+02 2.275000000000000000e+01 6.175000000000000000e+01
3.700000000000000000e+01 5.561615384615387256e+02 3.354249877929687500e+02 2.581146240234375000e+00 0.000000000000000000e+00 0.000000000000000000e+00 2.409629638671875000e+03 2.005348443984985352e+00 2.000000000000000000e+00 3.000000000000000000e+00 1.390517425537109375e+02 2.475000000000000000e+01 6.175000000000000000e+01
4.600000000000000000e+01 5.603923076923074404e+02 3.395745849609375000e+02 2.246124267578125000e+00 0.000000000000000000e+00 0.000000000000000000e+00 2.380797607421875000e+03 2.010461091995239258e+00 2.000000000000000000e+00 4.000000000000000000e+00 1.100716629028320312e+02 2.525000000000000000e+01 6.175000000000000000e+01
5.400000000000000000e+01 5.771923076923077360e+02 3.288495788574218750e+02 1.076171875000000000e+00 0.000000000000000000e+00 0.000000000000000000e+00 2.276484375000000000e+03 2.035331010818481445e+00 2.000000000000000000e+00 4.000000000000000000e+00 1.303260345458984375e+02 2.725000000000000000e+01 6.175000000000000000e+01
5.000000000000000000e+01 5.971769230769230035e+02 3.337436828613281250e+02 8.262023925781250000e-01 0.000000000000000000e+00 0.000000000000000000e+00 2.253159912109375000e+03 2.051764488220214844e+00 2.000000000000000000e+00 4.000000000000000000e+00 8.578613281250000000e+01 2.775000000000000000e+01 6.175000000000000000e+01
6.100000000000000000e+01 6.548076923076921503e+02 3.743513183593750000e+02 1.500244140625000000e-01 0.000000000000000000e+00 0.000000000000000000e+00 2.173043945312500000e+03 2.030485391616821289e+00 2.000000000000000000e+00 4.000000000000000000e+00 8.813291168212890625e+01 3.025000000000000000e+01 6.175000000000000000e+01
2.300000000000000000e+01 6.686923076923077360e+02 3.773855590820312500e+02 8.920288085937500000e-02 0.000000000000000000e+00 0.000000000000000000e+00 2.148885253906250000e+03 2.005795478820800781e+00 2.000000000000000000e+00 3.000000000000000000e+00 7.554647064208984375e+01 3.175000000000000000e+01 6.175000000000000000e+01
3.200000000000000000e+01 6.593692307692308532e+02 3.719091186523437500e+02 1.125793457031250000e-01 0.000000000000000000e+00 0.000000000000000000e+00 2.144898193359375000e+03 1.994119286537170410e+00 2.000000000000000000e+00 3.000000000000000000e+00 1.119669952392578125e+02 3.225000000000000000e+01 6.175000000000000000e+01
2.900000000000000000e+01 6.895769230769230944e+02 3.626791076660156250e+02 1.505432128906250000e-01 0.000000000000000000e+00 0.000000000000000000e+00 2.142266357421875000e+03 1.980772733688354492e+00 2.000000000000000000e+00 3.000000000000000000e+00 1.078040847778320312e+02 3.275000000000000000e+01 6.175000000000000000e+01
6.000000000000000000e+00 1.848723076923076405e+03 4.781853637695312500e+02 4.656616210937500000e+00 0.000000000000000000e+00 0.000000000000000000e+00 2.113742187500000000e+03 1.885090708732604980e+00 2.000000000000000000e+00 1.000000000000000000e+00 5.295466918945312500e+02 6.250000000000000000e+00 6.225000000000000000e+01
7.000000000000000000e+00 1.137530769230769238e+03 4.138231506347656250e+02 6.826477050781250000e-01 9.999999776482582092e-03 0.000000000000000000e+00 1.330593627929687500e+03 8.689206838607788086e-01 1.200000000000000000e+01 1.000000000000000000e+00 7.987975463867187500e+02 8.250000000000000000e+00 6.225000000000000000e+01
1.000000000000000000e+00 7.436153846153843006e+02 3.189677734375000000e+02 -9.167480468750000000e-01 1.728956252336502075e-01 0.000000000000000000e+00 1.226508666992187500e+03 1.104892611503601074e+00 1.200000000000000000e+01 1.000000000000000000e+00 1.139098754882812500e+03 9.750000000000000000e+00 6.225000000000000000e+01
5.000000000000000000e+00 5.221307692307694879e+02 3.263167419433593750e+02 -1.333129882812500000e+00 9.999999776482582092e-03 0.000000000000000000e+00 1.245891601562500000e+03 1.371129751205444336e+00 2.000000000000000000e+00 1.000000000000000000e+00 9.798197631835937500e+02 1.025000000000000000e+01 6.225000000000000000e+01
9.000000000000000000e+00 5.246461538461538794e+02 3.040182189941406250e+02 -1.749542236328125000e+00 0.000000000000000000e+00 0.000000000000000000e+00 1.265274658203125000e+03 1.525564432144165039e+00 2.000000000000000000e+00 1.000000000000000000e+00 6.619536132812500000e+02 1.075000000000000000e+01 6.225000000000000000e+01
3.000000000000000000e+00 5.699538461538460297e+02 2.718509826660156250e+02 -2.165924072265625000e+00 1.412022709846496582e-01 0.000000000000000000e+00 1.284657592773437500e+03 1.430682539939880371e+00 2.000000000000000000e+00 1.000000000000000000e+00 1.100435424804687500e+03 1.125000000000000000e+01 6.225000000000000000e+01
1.300000000000000000e+01 6.021769230769230035e+02 2.457510375976562500e+02 -2.075347900390625000e+00 0.000000000000000000e+00 0.000000000000000000e+00 1.305793945312500000e+03 1.538896083831787109e+00 2.000000000000000000e+00 1.000000000000000000e+00 7.122761840820312500e+02 1.175000000000000000e+01 6.225000000000000000e+01
3.000000000000000000e+00 6.967999999999998408e+02 2.487546539306640625e+02 -1.984771728515625000e+00 9.999999776482582092e-03 0.000000000000000000e+00 1.326930175781250000e+03 1.333835959434509277e+00 2.000000000000000000e+00 1.000000000000000000e+00 8.809360961914062500e+02 1.225000000000000000e+01 6.225000000000000000e+01
1.000000000000000000e+01 7.068615384615385437e+02 2.721957397460937500e+02 -1.894226074218750000e+00 0.000000000000000000e+00 0.000000000000000000e+00 1.348066406250000000e+03 1.503844380378723145e+00 2.000000000000000000e+00 1.000000000000000000e+00 7.968016967773437500e+02 1.275000000000000000e+01 6.225000000000000000e+01
2.400000000000000000e+01 7.220769230769225260e+02 2.929182434082031250e+02 -1.720275878906250000e+00 0.000000000000000000e+00 0.000000000000000000e+00 1.383922851562500000e+03 1.528285980224609375e+00 2.000000000000000000e+00 3.000000000000000000e+00 6.826381835937500000e+02 1.325000000000000000e+01 6.225000000000000000e+01
4.200000000000000000e+01 7.711692307692308077e+02 3.155511169433593750e+02 -1.296295166015625000e+00 0.000000000000000000e+00 0.000000000000000000e+00 1.463939941406250000e+03 1.563382744789123535e+00 2.000000000000000000e+00 3.000000000000000000e+00 4.685498352050781250e+02 1.375000000000000000e+01 6.225000000000000000e+01
1.900000000000000000e+01 6.854999999999998863e+02 3.288169555664062500e+02 -8.723144531250000000e-01 0.000000000000000000e+00 0.000000000000000000e+00 1.543956909179687500e+03 1.655820727348327637e+00 2.000000000000000000e+00 1.000000000000000000e+00 6.299049682617187500e+02 1.425000000000000000e+01 6.225000000000000000e+01
7.000000000000000000e+01 6.644846153846153811e+02 3.321007995605468750e+02 -4.483337402343750000e-01 0.000000000000000000e+00 0.000000000000000000e+00 1.623973999023437500e+03 1.739530324935913086e+00 2.000000000000000000e+00 4.000000000000000000e+00 4.230829772949218750e+02 1.475000000000000000e+01 6.225000000000000000e+01
5.000000000000000000e+01 6.554923076923078042e+02 3.306615905761718750e+02 2.606201171875000000e-02 0.000000000000000000e+00 0.000000000000000000e+00 1.706282104492187500e+03 1.767662644386291504e+00 2.000000000000000000e+00 4.000000000000000000e+00 3.324484252929687500e+02 1.525000000000000000e+01 6.225000000000000000e+01
5.500000000000000000e+01 6.832307692307692832e+02 3.236921386718750000e+02 5.509033203125000000e-01 0.000000000000000000e+00 0.000000000000000000e+00 1.790881225585937500e+03 1.779623985290527344e+00 2.000000000000000000e+00 4.000000000000000000e+00 3.884187011718750000e+02 1.575000000000000000e+01 6.225000000000000000e+01
3.000000000000000000e+01 6.692000000000000455e+02 3.100446777343750000e+02 1.075714111328125000e+00 0.000000000000000000e+00 0.000000000000000000e+00 1.875480346679687500e+03 1.793434739112854004e+00 2.000000000000000000e+00 3.000000000000000000e+00 4.555635681152343750e+02 1.625000000000000000e+01 6.225000000000000000e+01
9.000000000000000000e+00 5.536538461538459615e+02 3.389663696289062500e+02 3.898162841796875000e+00 0.000000000000000000e+00 0.000000000000000000e+00 2.361201660156250000e+03 2.010533809661865234e+00 2.000000000000000000e+00 1.000000000000000000e+00 7.233601379394531250e+01 2.175000000000000000e+01 6.225000000000000000e+01
2.200000000000000000e+01 5.716076923076925596e+02 3.472087402343750000e+02 3.593475341796875000e+00 0.000000000000000000e+00 0.000000000000000000e+00 2.388607177734375000e+03 2.017658948898315430e+00 2.000000000000000000e+00 3.000000000000000000e+00 1.588493041992187500e+02 2.225000000000000000e+01 6.225000000000000000e+01
2.100000000000000000e+01 5.732076923076923549e+02 3.488771667480468750e+02 3.322784423828125000e+00 0.000000000000000000e+00 5.882353186607360840e-01 2.398398193359375000e+03 2.023728609085083008e+00 1.500000000000000000e+01 3.000000000000000000e+00 1.535082244873046875e+02 2.275000000000000000e+01 6.225000000000000000e+01
4.800000000000000000e+01 5.560230769230770420e+02 3.368245239257812500e+02 3.086120605468750000e+00 0.000000000000000000e+00 0.000000000000000000e+00 2.390574951171875000e+03 2.023624181747436523e+00 2.000000000000000000e+00 4.000000000000000000e+00 1.530747222900390625e+02 2.325000000000000000e+01 6.225000000000000000e+01
5.100000000000000000e+01 5.373999999999997499e+02 3.273606567382812500e+02 2.849456787109375000e+00 0.000000000000000000e+00 0.000000000000000000e+00 2.382751464843750000e+03 2.013344287872314453e+00 2.000000000000000000e+00 4.000000000000000000e+00 1.129591598510742188e+02 2.375000000000000000e+01 6.225000000000000000e+01
4.200000000000000000e+01 5.268923076923073268e+02 3.252012634277343750e+02 2.612792968750000000e+00 0.000000000000000000e+00 0.000000000000000000e+00 2.374927978515625000e+03 2.011320590972900391e+00 2.000000000000000000e+00 3.000000000000000000e+00 1.815637512207031250e+02 2.425000000000000000e+01 6.225000000000000000e+01
4.400000000000000000e+01 5.219000000000000909e+02 3.292164001464843750e+02 2.002532958984375000e+00 0.000000000000000000e+00 0.000000000000000000e+00 2.324415039062500000e+03 2.012626647949218750e+00 2.000000000000000000e+00 3.000000000000000000e+00 1.336410675048828125e+02 2.525000000000000000e+01 6.225000000000000000e+01
3.000000000000000000e+01 5.575000000000000000e+02 3.071694641113281250e+02 1.117370605468750000e+00 0.000000000000000000e+00 0.000000000000000000e+00 2.243575927734375000e+03 2.029983758926391602e+00 2.000000000000000000e+00 3.000000000000000000e+00 1.663653106689453125e+02 2.675000000000000000e+01 6.225000000000000000e+01
5.900000000000000000e+01 5.580769230769234355e+02 3.032959594726562500e+02 6.067504882812500000e-01 0.000000000000000000e+00 0.000000000000000000e+00 2.192885253906250000e+03 2.047595500946044922e+00 2.000000000000000000e+00 4.000000000000000000e+00 8.481593322753906250e+01 2.775000000000000000e+01 6.225000000000000000e+01
5.300000000000000000e+01 6.181307692307690331e+02 3.210382690429687500e+02 2.372131347656250000e-01 0.000000000000000000e+00 0.000000000000000000e+00 2.151820800781250000e+03 2.017191648483276367e+00 2.000000000000000000e+00 4.000000000000000000e+00 1.121082458496093750e+02 2.875000000000000000e+01 6.225000000000000000e+01
3.500000000000000000e+01 6.478538461538458932e+02 3.621327819824218750e+02 -1.335754394531250000e-01 0.000000000000000000e+00 2.941176593303680420e-01 2.103246337890625000e+03 1.993100047111511230e+00 2.000000000000000000e+00 3.000000000000000000e+00 1.034814682006835938e+02 3.025000000000000000e+01 6.225000000000000000e+01
2.600000000000000000e+01 6.483384615384616154e+02 3.751046142578125000e+02 -1.919860839843750000e-01 0.000000000000000000e+00 0.000000000000000000e+00 2.085390869140625000e+03 1.982127308845520020e+00 2.000000000000000000e+00 3.000000000000000000e+00 1.840201568603515625e+02 3.125000000000000000e+01 6.225000000000000000e+01
4.900000000000000000e+01 6.549230769230767919e+02 3.754266357421875000e+02 -2.211608886718750000e-01 0.000000000000000000e+00 0.000000000000000000e+00 2.076462890625000000e+03 1.970018863677978516e+00 2.000000000000000000e+00 4.000000000000000000e+00 2.002016448974609375e+02 3.175000000000000000e+01 6.225000000000000000e+01
5.300000000000000000e+01 6.694538461538463707e+02 3.741741027832031250e+02 -1.884155273437500000e-01 0.000000000000000000e+00 0.000000000000000000e+00 2.074051025390625000e+03 1.955976486206054688e+00 2.000000000000000000e+00 4.000000000000000000e+00 1.336505432128906250e+02 3.225000000000000000e+01 6.225000000000000000e+01
1.100000000000000000e+01 1.266453846153845916e+03 5.283385009765625000e+02 1.650146484375000000e+00 1.030057445168495178e-01 0.000000000000000000e+00 1.537862915039062500e+03 1.195210099220275879e+00 2.000000000000000000e+00 1.000000000000000000e+00 7.521611938476562500e+02 8.750000000000000000e+00 6.275000000000000000e+01
1.000000000000000000e+00 7.740846153846155175e+02 4.279499816894531250e+02 -7.827758789062500000e-02 0.000000000000000000e+00 0.000000000000000000e+00 1.382540405273437500e+03 1.439555287361145020e+00 2.000000000000000000e+00 1.000000000000000000e+00 9.329828491210937500e+02 1.025000000000000000e+01 6.275000000000000000e+01
4.000000000000000000e+00 7.169538461538463707e+02 3.898320312500000000e+02 -6.638183593750000000e-01 9.999999776482582092e-03 0.000000000000000000e+00 1.354230102539062500e+03 1.366699814796447754e+00 2.000000000000000000e+00 1.000000000000000000e+00 1.092614868164062500e+03 1.075000000000000000e+01 6.275000000000000000e+01
1.000000000000000000e+00 7.287538461538459842e+02 3.511072387695312500e+02 -1.249389648437500000e+00 9.999999776482582092e-03 0.000000000000000000e+00 1.325919677734375000e+03 1.405323863029479980e+00 2.000000000000000000e+00 1.000000000000000000e+00 9.005443725585937500e+02 1.125000000000000000e+01 6.275000000000000000e+01
1.000000000000000000e+00 7.720923076923075996e+02 3.452463073730468750e+02 -1.340728759765625000e+00 9.999999776482582092e-03 0.000000000000000000e+00 1.326644409179687500e+03 1.302225708961486816e+00 2.000000000000000000e+00 1.000000000000000000e+00 8.968403320312500000e+02 1.175000000000000000e+01 6.275000000000000000e+01
5.000000000000000000e+00 8.117076923076923549e+02 3.532723388671875000e+02 -1.432037353515625000e+00 9.999999776482582092e-03 0.000000000000000000e+00 1.327369140625000000e+03 1.200211405754089355e+00 1.200000000000000000e+01 1.000000000000000000e+00 1.000397827148437500e+03 1.225000000000000000e+01 6.275000000000000000e+01
6.000000000000000000e+00 7.717000000000000455e+02 3.615505676269531250e+02 -1.523376464843750000e+00 9.999999776482582092e-03 0.000000000000000000e+00 1.328093750000000000e+03 1.292361497879028320e+00 1.200000000000000000e+01 1.000000000000000000e+00 9.127622680664062500e+02 1.275000000000000000e+01 6.275000000000000000e+01
4.900000000000000000e+01 6.874538461538461434e+02 3.480641784667968750e+02 -1.525238037109375000e+00 0.000000000000000000e+00 0.000000000000000000e+00 1.345234863281250000e+03 1.472874522209167480e+00 1.200000000000000000e+01 4.000000000000000000e+00 6.539652099609375000e+02 1.325000000000000000e+01 6.275000000000000000e+01
4.500000000000000000e+01 7.540230769230768146e+02 3.218040466308593750e+02 -1.258666992187500000e+00 0.000000000000000000e+00 0.000000000000000000e+00 1.411625122070312500e+03 1.553869366645812988e+00 2.000000000000000000e+00 4.000000000000000000e+00 5.342606811523437500e+02 1.375000000000000000e+01 6.275000000000000000e+01
4.700000000000000000e+01 6.215230769230764736e+02 2.983996887207031250e+02 -9.920959472656250000e-01 0.000000000000000000e+00 0.000000000000000000e+00 1.478015258789062500e+03 1.671543478965759277e+00 2.000000000000000000e+00 4.000000000000000000e+00 4.447838134765625000e+02 1.425000000000000000e+01 6.275000000000000000e+01
6.300000000000000000e+01 5.878076923076918092e+02 2.874363708496093750e+02 -7.255249023437500000e-01 0.000000000000000000e+00 0.000000000000000000e+00 1.544405517578125000e+03 1.758303880691528320e+00 2.000000000000000000e+00 4.000000000000000000e+00 3.903987426757812500e+02 1.475000000000000000e+01 6.275000000000000000e+01
7.200000000000000000e+01 6.397999999999999545e+02 2.901481933593750000e+02 -3.706970214843750000e-01 0.000000000000000000e+00 0.000000000000000000e+00 1.614598876953125000e+03 1.774781703948974609e+00 2.000000000000000000e+00 4.000000000000000000e+00 3.228154296875000000e+02 1.525000000000000000e+01 6.275000000000000000e+01
5.700000000000000000e+01 6.651230769230769511e+02 3.011296691894531250e+02 7.241821289062500000e-02 0.000000000000000000e+00 0.000000000000000000e+00 1.688595336914062500e+03 1.778349757194519043e+00 2.000000000000000000e+00 4.000000000000000000e+00 3.661014404296875000e+02 1.575000000000000000e+01 6.275000000000000000e+01
6.000000000000000000e+01 6.501461538461537657e+02 3.045324707031250000e+02 5.155334472656250000e-01 0.000000000000000000e+00 0.000000000000000000e+00 1.762591796875000000e+03 1.790724515914916992e+00 2.000000000000000000e+00 4.000000000000000000e+00 2.641807250976562500e+02 1.625000000000000000e+01 6.275000000000000000e+01
4.800000000000000000e+01 6.767230769230768601e+02 2.988627014160156250e+02 9.586791992187500000e-01 0.000000000000000000e+00 0.000000000000000000e+00 1.836588256835937500e+03 1.804684162139892578e+00 2.000000000000000000e+00 4.000000000000000000e+00 1.764726257324218750e+02 1.675000000000000000e+01 6.275000000000000000e+01
5.900000000000000000e+01 5.522384615384618201e+02 2.994265441894531250e+02 3.308532714843750000e+00 0.000000000000000000e+00 0.000000000000000000e+00 2.202338378906250000e+03 1.981953024864196777e+00 2.000000000000000000e+00 4.000000000000000000e+00 5.481974411010742188e+01 2.175000000000000000e+01 6.275000000000000000e+01
6.000000000000000000e+01 5.585692307692307850e+02 3.030233459472656250e+02 3.071807861328125000e+00 0.000000000000000000e+00 0.000000000000000000e+00 2.221697753906250000e+03 1.983329653739929199e+00 8.000000000000000000e+00 4.000000000000000000e+00 1.036604537963867188e+02 2.225000000000000000e+01 6.275000000000000000e+01
4.800000000000000000e+01 5.494384615384615245e+02 3.033908691406250000e+02 2.871307373046875000e+00 0.000000000000000000e+00 0.000000000000000000e+00 2.243286132812500000e+03 1.985382676124572754e+00 2.000000000000000000e+00 4.000000000000000000e+00 7.785363006591796875e+01 2.275000000000000000e+01 6.275000000000000000e+01
5.300000000000000000e+01 5.438461538461540385e+02 3.037985534667968750e+02 2.707000732421875000e+00 0.000000000000000000e+00 0.000000000000000000e+00 2.267103515625000000e+03 1.980192065238952637e+00 2.000000000000000000e+00 4.000000000000000000e+00 1.238877487182617188e+02 2.325000000000000000e+01 6.275000000000000000e+01
3.200000000000000000e+01 5.459307692307692150e+02 3.064168701171875000e+02 2.542663574218750000e+00 0.000000000000000000e+00 0.000000000000000000e+00 2.290920898437500000e+03 1.971391558647155762e+00 2.000000000000000000e+00 3.000000000000000000e+00 1.628205871582031250e+02 2.375000000000000000e+01 6.275000000000000000e+01
4.500000000000000000e+01 5.434615384615387939e+02 3.098567810058593750e+02 2.378356933593750000e+00 0.000000000000000000e+00 0.000000000000000000e+00 2.314738281250000000e+03 1.968683242797851562e+00 2.000000000000000000e+00 4.000000000000000000e+00 1.925257568359375000e+02 2.425000000000000000e+01 6.275000000000000000e+01
4.200000000000000000e+01 5.344230769230766782e+02 3.124142150878906250e+02 2.127502441406250000e+00 0.000000000000000000e+00 0.000000000000000000e+00 2.301984863281250000e+03 1.970145344734191895e+00 1.500000000000000000e+01 3.000000000000000000e+00 1.724497528076171875e+02 2.475000000000000000e+01 6.275000000000000000e+01
5.100000000000000000e+01 5.322153846153846644e+02 3.112628173828125000e+02 1.847778320312500000e+00 0.000000000000000000e+00 0.000000000000000000e+00 2.277041259765625000e+03 1.981910705566406250e+00 2.000000000000000000e+00 4.000000000000000000e+00 1.924266662597656250e+02 2.525000000000000000e+01 6.275000000000000000e+01
5.600000000000000000e+01 5.316307692307690331e+02 3.096079406738281250e+02 1.568084716796875000e+00 0.000000000000000000e+00 0.000000000000000000e+00 2.252097656250000000e+03 1.990570902824401855e+00 2.000000000000000000e+00 4.000000000000000000e+00 1.374081420898437500e+02 2.575000000000000000e+01 6.275000000000000000e+01
5.200000000000000000e+01 5.780076923076920821e+02 2.896068420410156250e+02 3.139648437500000000e-01 0.000000000000000000e+00 0.000000000000000000e+00 2.123747070312500000e+03 2.007834672927856445e+00 2.000000000000000000e+00 4.000000000000000000e+00 1.080200195312500000e+02 2.825000000000000000e+01 6.275000000000000000e+01
5.400000000000000000e+01 6.459307692307691013e+02 3.294162292480468750e+02 -2.506408691406250000e-01 0.000000000000000000e+00 0.000000000000000000e+00 2.050764160156250000e+03 1.957146525382995605e+00 2.000000000000000000e+00 4.000000000000000000e+00 1.274549179077148438e+02 3.025000000000000000e+01 6.275000000000000000e+01
2.500000000000000000e+01 6.397076923076922412e+02 3.443051147460937500e+02 -2.939453125000000000e-01 0.000000000000000000e+00 0.000000000000000000e+00 2.040851196289062500e+03 1.958336353302001953e+00 2.000000000000000000e+00 3.000000000000000000e+00 1.556908569335937500e+02 3.075000000000000000e+01 6.275000000000000000e+01
3.200000000000000000e+01 6.334230769230770193e+02 3.541245727539062500e+02 -3.372802734375000000e-01 0.000000000000000000e+00 0.000000000000000000e+00 2.030938232421875000e+03 1.956609964370727539e+00 2.000000000000000000e+00 3.000000000000000000e+00 1.645805969238281250e+02 3.125000000000000000e+01 6.275000000000000000e+01
5.800000000000000000e+01 6.343999999999998636e+02 3.613582763671875000e+02 -3.805847167968750000e-01 0.000000000000000000e+00 0.000000000000000000e+00 2.021025146484375000e+03 1.941117405891418457e+00 1.500000000000000000e+01 4.000000000000000000e+00 1.856968078613281250e+02 3.175000000000000000e+01 6.275000000000000000e+01
4.100000000000000000e+01 6.581615384615381572e+02 3.778006286621093750e+02 -3.117980957031250000e-01 0.000000000000000000e+00 0.000000000000000000e+00 2.016966552734375000e+03 1.907945156097412109e+00 2.000000000000000000e+00 3.000000000000000000e+00 2.133472595214843750e+02 3.275000000000000000e+01 6.275000000000000000e+01
7.000000000000000000e+00 1.005215384615384551e+03 4.825688171386718750e+02 -3.328247070312500000e-01 0.000000000000000000e+00 0.000000000000000000e+00 1.367181762695312500e+03 1.733934521675109863e+00 2.000000000000000000e+00 1.000000000000000000e+00 5.593341064453125000e+02 1.125000000000000000e+01 6.325000000000000000e+01
2.200000000000000000e+01 8.901461538461542204e+02 4.961573486328125000e+02 -8.793029785156250000e-01 0.000000000000000000e+00 0.000000000000000000e+00 1.327807983398437500e+03 1.259446620941162109e+00 2.000000000000000000e+00 3.000000000000000000e+00 7.822186889648437500e+02 1.225000000000000000e+01 6.325000000000000000e+01
3.700000000000000000e+01 7.601076923076925596e+02 4.327043762207031250e+02 -1.330200195312500000e+00 0.000000000000000000e+00 0.000000000000000000e+00 1.306546875000000000e+03 1.536837339401245117e+00 2.000000000000000000e+00 3.000000000000000000e+00 5.083529357910156250e+02 1.325000000000000000e+01 6.325000000000000000e+01
3.300000000000000000e+01 5.925230769230768146e+02 2.745115051269531250e+02 -7.674560546875000000e-01 0.000000000000000000e+00 0.000000000000000000e+00 1.522915649414062500e+03 1.785275220870971680e+00 2.000000000000000000e+00 3.000000000000000000e+00 2.700018920898437500e+02 1.525000000000000000e+01 6.325000000000000000e+01
6.400000000000000000e+01 6.324769230769229580e+02 3.005833435058593750e+02 -4.060363769531250000e-01 0.000000000000000000e+00 0.000000000000000000e+00 1.586309448242187500e+03 1.766029953956604004e+00 2.000000000000000000e+00 4.000000000000000000e+00 3.699574890136718750e+02 1.575000000000000000e+01 6.325000000000000000e+01
4.700000000000000000e+01 6.673153846153843460e+02 3.197860717773437500e+02 -4.461669921875000000e-02 0.000000000000000000e+00 0.000000000000000000e+00 1.649703125000000000e+03 1.755063533782958984e+00 2.000000000000000000e+00 4.000000000000000000e+00 3.922992553710937500e+02 1.625000000000000000e+01 6.325000000000000000e+01
4.200000000000000000e+01 6.701307692307693742e+02 3.226636352539062500e+02 3.168029785156250000e-01 0.000000000000000000e+00 0.000000000000000000e+00 1.713096923828125000e+03 1.776096582412719727e+00 2.000000000000000000e+00 3.000000000000000000e+00 1.698035430908203125e+02 1.675000000000000000e+01 6.325000000000000000e+01
6.200000000000000000e+01 6.538999999999997499e+02 3.144509582519531250e+02 7.326049804687500000e-01 0.000000000000000000e+00 0.000000000000000000e+00 1.773177246093750000e+03 1.811082243919372559e+00 2.000000000000000000e+00 4.000000000000000000e+00 1.623854370117187500e+02 1.725000000000000000e+01 6.325000000000000000e+01
5.200000000000000000e+01 6.943923076923080089e+02 2.995958251953125000e+02 1.166564941406250000e+00 0.000000000000000000e+00 0.000000000000000000e+00 1.832153076171875000e+03 1.830167174339294434e+00 2.000000000000000000e+00 4.000000000000000000e+00 2.435668945312500000e+02 1.775000000000000000e+01 6.325000000000000000e+01
5.300000000000000000e+01 7.246461538461537657e+02 2.834232482910156250e+02 1.600524902343750000e+00 0.000000000000000000e+00 0.000000000000000000e+00 1.891128784179687500e+03 1.850083112716674805e+00 2.000000000000000000e+00 4.000000000000000000e+00 1.394112854003906250e+02 1.825000000000000000e+01 6.325000000000000000e+01
2.400000000000000000e+01 5.436923076923078497e+02 2.849931335449218750e+02 2.327850341796875000e+00 0.000000000000000000e+00 0.000000000000000000e+00 2.143632080078125000e+03 1.945677757263183594e+00 2.000000000000000000e+00 3.000000000000000000e+00 7.099910736083984375e+01 2.325000000000000000e+01 6.325000000000000000e+01
1.700000000000000000e+01 5.453538461538464617e+02 3.006154174804687500e+02 2.143920898437500000e+00 0.000000000000000000e+00 0.000000000000000000e+00 2.254548583984375000e+03 1.938257455825805664e+00 2.000000000000000000e+00 1.000000000000000000e+00 1.690724639892578125e+02 2.425000000000000000e+01 6.325000000000000000e+01
3.400000000000000000e+01 5.409461538461536065e+02 3.038290405273437500e+02 1.937561035156250000e+00 0.000000000000000000e+00 0.000000000000000000e+00 2.251807861328125000e+03 1.943666696548461914e+00 2.000000000000000000e+00 3.000000000000000000e+00 1.936067962646484375e+02 2.475000000000000000e+01 6.325000000000000000e+01
4.600000000000000000e+01 5.365846153846154039e+02 3.019247131347656250e+02 1.693054199218750000e+00 0.000000000000000000e+00 0.000000000000000000e+00 2.229667480468750000e+03 1.957809805870056152e+00 2.000000000000000000e+00 4.000000000000000000e+00 1.585766754150390625e+02 2.525000000000000000e+01 6.325000000000000000e+01
6.000000000000000000e+01 5.201000000000001364e+02 2.960042114257812500e+02 1.204071044921875000e+00 0.000000000000000000e+00 0.000000000000000000e+00 2.185386474609375000e+03 1.986851811408996582e+00 2.000000000000000000e+00 4.000000000000000000e+00 1.109780654907226562e+02 2.625000000000000000e+01 6.325000000000000000e+01
4.400000000000000000e+01 5.195538461538458250e+02 2.935315246582031250e+02 9.603881835937500000e-01 0.000000000000000000e+00 0.000000000000000000e+00 2.158173095703125000e+03 2.003784179687500000e+00 2.000000000000000000e+00 3.000000000000000000e+00 1.146120529174804688e+02 2.675000000000000000e+01 6.325000000000000000e+01
5.600000000000000000e+01 5.179769230769229580e+02 2.884317626953125000e+02 4.729919433593750000e-01 0.000000000000000000e+00 0.000000000000000000e+00 2.103746093750000000e+03 2.014878988265991211e+00 2.000000000000000000e+00 4.000000000000000000e+00 1.555886993408203125e+02 2.775000000000000000e+01 6.325000000000000000e+01
3.700000000000000000e+01 5.331692307692306940e+02 2.885512695312500000e+02 2.482604980468750000e-01 0.000000000000000000e+00 0.000000000000000000e+00 2.078028808593750000e+03 1.998340129852294922e+00 2.000000000000000000e+00 3.000000000000000000e+00 1.157166595458984375e+02 2.825000000000000000e+01 6.325000000000000000e+01
4.600000000000000000e+01 5.510461538461539703e+02 2.871892089843750000e+02 8.047485351562500000e-02 0.000000000000000000e+00 0.000000000000000000e+00 2.056801025390625000e+03 1.976718544960021973e+00 2.000000000000000000e+00 4.000000000000000000e+00 1.674615325927734375e+02 2.875000000000000000e+01 6.325000000000000000e+01
5.500000000000000000e+01 6.525076923076921958e+02 3.075406188964843750e+02 -3.677062988281250000e-01 0.000000000000000000e+00 0.000000000000000000e+00 1.998282104492187500e+03 1.905817389488220215e+00 2.000000000000000000e+00 4.000000000000000000e+00 1.594771728515625000e+02 3.025000000000000000e+01 6.325000000000000000e+01
5.100000000000000000e+01 7.093307692307693060e+02 3.185513305664062500e+02 -4.251403808593750000e-01 0.000000000000000000e+00 0.000000000000000000e+00 1.987383789062500000e+03 1.880076408386230469e+00 2.000000000000000000e+00 4.000000000000000000e+00 1.797375183105468750e+02 3.075000000000000000e+01 6.325000000000000000e+01
4.200000000000000000e+01 6.702307692307695106e+02 3.274035644531250000e+02 -4.825744628906250000e-01 0.000000000000000000e+00 0.000000000000000000e+00 1.976485595703125000e+03 1.885944128036499023e+00 1.500000000000000000e+01 3.000000000000000000e+00 2.318296661376953125e+02 3.125000000000000000e+01 6.325000000000000000e+01
4.800000000000000000e+01 6.270769230769227534e+02 3.376880187988281250e+02 -5.400085449218750000e-01 0.000000000000000000e+00 0.000000000000000000e+00 1.965587280273437500e+03 1.885855793952941895e+00 2.000000000000000000e+00 4.000000000000000000e+00 2.057092437744140625e+02 3.175000000000000000e+01 6.325000000000000000e+01
3.700000000000000000e+01 6.619692307692311033e+02 3.514250183105468750e+02 -5.261840820312500000e-01 0.000000000000000000e+00 0.000000000000000000e+00 1.961688232421875000e+03 1.869915008544921875e+00 2.000000000000000000e+00 3.000000000000000000e+00 1.733362884521484375e+02 3.225000000000000000e+01 6.325000000000000000e+01
5.300000000000000000e+01 6.554000000000002046e+02 3.658703308105468750e+02 -4.885864257812500000e-01 0.000000000000000000e+00 2.941176593303680420e-01 1.960122070312500000e+03 1.856309890747070312e+00 2.000000000000000000e+00 4.000000000000000000e+00 2.189601135253906250e+02 3.275000000000000000e+01 6.325000000000000000e+01
1.300000000000000000e+01 1.585892307692309032e+03 3.862201843261718750e+02 2.407073974609375000e+00 0.000000000000000000e+00 0.000000000000000000e+00 1.458337158203125000e+03 1.084116339683532715e+00 0.000000000000000000e+00 1.000000000000000000e+00 3.678302001953125000e+02 -1.875000000000000000e+01 6.375000000000000000e+01
4.200000000000000000e+01 1.655038461538460979e+03 4.212928161621093750e+02 2.920288085937500000e+00 0.000000000000000000e+00 0.000000000000000000e+00 1.554621215820312500e+03 7.794883847236633301e-01 0.000000000000000000e+00 3.000000000000000000e+00 1.498418731689453125e+02 -1.825000000000000000e+01 6.375000000000000000e+01
3.100000000000000000e+01 1.245430769230769783e+03 5.130266113281250000e+02 1.285705566406250000e-01 0.000000000000000000e+00 0.000000000000000000e+00 1.368345336914062500e+03 1.695992588996887207e+00 2.000000000000000000e+00 3.000000000000000000e+00 2.037280426025390625e+02 1.175000000000000000e+01 6.375000000000000000e+01
1.000000000000000000e+01 1.090792307692307986e+03 5.293053588867187500e+02 -3.265686035156250000e-01 0.000000000000000000e+00 0.000000000000000000e+00 1.328246948242187500e+03 1.449408173561096191e+00 2.000000000000000000e+00 1.000000000000000000e+00 5.212083740234375000e+02 1.225000000000000000e+01 6.375000000000000000e+01
2.800000000000000000e+01 6.068076923076921503e+02 4.100976867675781250e+02 -1.231689453125000000e+00 0.000000000000000000e+00 0.000000000000000000e+00 1.346131958007812500e+03 1.693253755569458008e+00 2.000000000000000000e+00 3.000000000000000000e+00 5.306237792968750000e+02 1.425000000000000000e+01 6.375000000000000000e+01
5.400000000000000000e+01 5.540846153846156312e+02 3.560488586425781250e+02 -1.279937744140625000e+00 0.000000000000000000e+00 0.000000000000000000e+00 1.385268676757812500e+03 1.742846846580505371e+00 2.000000000000000000e+00 4.000000000000000000e+00 3.489937744140625000e+02 1.475000000000000000e+01 6.375000000000000000e+01
3.600000000000000000e+01 5.683076923076924913e+02 3.316036682128906250e+02 -1.164215087890625000e+00 0.000000000000000000e+00 0.000000000000000000e+00 1.431232421875000000e+03 1.771487236022949219e+00 2.000000000000000000e+00 3.000000000000000000e+00 3.344795227050781250e+02 1.525000000000000000e+01 6.375000000000000000e+01
4.500000000000000000e+01 6.035307692307694651e+02 3.294669189453125000e+02 -8.844909667968750000e-01 0.000000000000000000e+00 0.000000000000000000e+00 1.484023559570312500e+03 1.772392153739929199e+00 2.000000000000000000e+00 4.000000000000000000e+00 2.771992187500000000e+02 1.575000000000000000e+01 6.375000000000000000e+01
4.400000000000000000e+01 6.200307692307690104e+02 3.349586486816406250e+02 -6.047973632812500000e-01 0.000000000000000000e+00 0.000000000000000000e+00 1.536814575195312500e+03 1.759992957115173340e+00 2.000000000000000000e+00 3.000000000000000000e+00 3.173279418945312500e+02 1.625000000000000000e+01 6.375000000000000000e+01
5.200000000000000000e+01 6.090461538461540840e+02 3.408630371093750000e+02 1.318359375000000000e-02 0.000000000000000000e+00 0.000000000000000000e+00 1.648242919921875000e+03 1.784091353416442871e+00 2.000000000000000000e+00 4.000000000000000000e+00 3.467439575195312500e+02 1.725000000000000000e+01 6.375000000000000000e+01
3.400000000000000000e+01 6.664461538461541750e+02 3.279395446777343750e+02 3.710021972656250000e-01 0.000000000000000000e+00 0.000000000000000000e+00 1.708828857421875000e+03 1.791386961936950684e+00 2.000000000000000000e+00 3.000000000000000000e+00 3.037393493652343750e+02 1.775000000000000000e+01 6.375000000000000000e+01
4.900000000000000000e+01 6.855538461538461661e+02 3.109250488281250000e+02 7.287902832031250000e-01 0.000000000000000000e+00 0.000000000000000000e+00 1.769414794921875000e+03 1.792492747306823730e+00 2.000000000000000000e+00 4.000000000000000000e+00 3.107539367675781250e+02 1.825000000000000000e+01 6.375000000000000000e+01
2.500000000000000000e+01 7.181846153846153129e+02 2.958993225097656250e+02 1.086608886718750000e+00 0.000000000000000000e+00 0.000000000000000000e+00 1.830000854492187500e+03 1.810109972953796387e+00 2.000000000000000000e+00 3.000000000000000000e+00 2.680608520507812500e+02 1.875000000000000000e+01 6.375000000000000000e+01
5.500000000000000000e+01 6.911230769230767237e+02 2.894946594238281250e+02 1.425109863281250000e+00 0.000000000000000000e+00 0.000000000000000000e+00 1.842603515625000000e+03 1.825245857238769531e+00 2.000000000000000000e+00 4.000000000000000000e+00 2.143607330322265625e+02 1.925000000000000000e+01 6.375000000000000000e+01
6.100000000000000000e+01 5.771538461538461888e+02 2.804018554687500000e+02 1.948699951171875000e+00 0.000000000000000000e+00 0.000000000000000000e+00 2.020160766601562500e+03 1.928676128387451172e+00 2.000000000000000000e+00 4.000000000000000000e+00 2.505089950561523438e+01 2.325000000000000000e+01 6.375000000000000000e+01
4.400000000000000000e+01 5.740692307692307850e+02 2.873850402832031250e+02 1.929077148437500000e+00 0.000000000000000000e+00 0.000000000000000000e+00 2.107259765625000000e+03 1.920113563537597656e+00 2.000000000000000000e+00 3.000000000000000000e+00 7.369926452636718750e+01 2.375000000000000000e+01 6.375000000000000000e+01
3.000000000000000000e+01 5.487846153846154493e+02 3.027930908203125000e+02 1.747619628906250000e+00 0.000000000000000000e+00 0.000000000000000000e+00 2.201630859375000000e+03 1.925334692001342773e+00 2.000000000000000000e+00 3.000000000000000000e+00 1.305669250488281250e+02 2.475000000000000000e+01 6.375000000000000000e+01
5.200000000000000000e+01 5.273615384615384301e+02 3.039774169921875000e+02 1.538330078125000000e+00 0.000000000000000000e+00 0.000000000000000000e+00 2.182293457031250000e+03 1.934875249862670898e+00 2.000000000000000000e+00 4.000000000000000000e+00 9.683246612548828125e+01 2.525000000000000000e+01 6.375000000000000000e+01
2.800000000000000000e+01 5.178615384615387711e+02 3.002274169921875000e+02 1.329040527343750000e+00 0.000000000000000000e+00 0.000000000000000000e+00 2.162956298828125000e+03 1.944995284080505371e+00 2.000000000000000000e+00 3.000000000000000000e+00 1.556438140869140625e+02 2.575000000000000000e+01 6.375000000000000000e+01
3.800000000000000000e+01 5.223615384615386574e+02 2.938603210449218750e+02 1.119750976562500000e+00 0.000000000000000000e+00 2.941176593303680420e-01 2.143619140625000000e+03 1.958132028579711914e+00 2.000000000000000000e+00 3.000000000000000000e+00 1.317619171142578125e+02 2.625000000000000000e+01 6.375000000000000000e+01
5.400000000000000000e+01 5.265461538461537430e+02 2.884932861328125000e+02 8.818664550781250000e-01 0.000000000000000000e+00 0.000000000000000000e+00 2.115471435546875000e+03 1.973136782646179199e+00 2.000000000000000000e+00 4.000000000000000000e+00 1.374003448486328125e+02 2.675000000000000000e+01 6.375000000000000000e+01
4.400000000000000000e+01 5.112999999999997840e+02 2.772210998535156250e+02 4.060974121093750000e-01 0.000000000000000000e+00 0.000000000000000000e+00 2.059176513671875000e+03 1.975810050964355469e+00 2.000000000000000000e+00 3.000000000000000000e+00 1.539322662353515625e+02 2.775000000000000000e+01 6.375000000000000000e+01
2.700000000000000000e+01 5.121846153846154266e+02 2.772028808593750000e+02 1.825561523437500000e-01 0.000000000000000000e+00 0.000000000000000000e+00 2.032310791015625000e+03 1.961766481399536133e+00 2.000000000000000000e+00 3.000000000000000000e+00 2.257729797363281250e+02 2.825000000000000000e+01 6.375000000000000000e+01
4.600000000000000000e+01 5.324769230769229580e+02 2.821144714355468750e+02 2.105712890625000000e-03 0.000000000000000000e+00 0.000000000000000000e+00 2.009291015625000000e+03 1.945459723472595215e+00 2.000000000000000000e+00 4.000000000000000000e+00 1.703851013183593750e+02 2.875000000000000000e+01 6.375000000000000000e+01
3.900000000000000000e+01 5.637307692307690559e+02 2.901272277832031250e+02 -1.783447265625000000e-01 0.000000000000000000e+00 0.000000000000000000e+00 1.986271240234375000e+03 1.926566720008850098e+00 1.500000000000000000e+01 3.000000000000000000e+00 1.732532196044921875e+02 2.925000000000000000e+01 6.375000000000000000e+01
4.500000000000000000e+01 5.647076923076922412e+02 2.993475341796875000e+02 -3.587951660156250000e-01 0.000000000000000000e+00 0.000000000000000000e+00 1.963251586914062500e+03 1.905760526657104492e+00 2.000000000000000000e+00 4.000000000000000000e+00 1.955057678222656250e+02 2.975000000000000000e+01 6.375000000000000000e+01
1.200000000000000000e+01 6.419307692307691013e+02 3.071237182617187500e+02 -4.847717285156250000e-01 0.000000000000000000e+00 0.000000000000000000e+00 1.945799926757812500e+03 1.877430438995361328e+00 2.000000000000000000e+00 1.000000000000000000e+00 1.964038696289062500e+02 3.025000000000000000e+01 6.375000000000000000e+01
3.000000000000000000e+01 6.741076923076919911e+02 3.124583435058593750e+02 -5.563354492187500000e-01 0.000000000000000000e+00 0.000000000000000000e+00 1.933916503906250000e+03 1.858155250549316406e+00 2.000000000000000000e+00 3.000000000000000000e+00 2.171046905517578125e+02 3.075000000000000000e+01 6.375000000000000000e+01
3.700000000000000000e+01 6.344076923076926278e+02 3.166496276855468750e+02 -6.278686523437500000e-01 0.000000000000000000e+00 0.000000000000000000e+00 1.922032958984375000e+03 1.867359042167663574e+00 2.000000000000000000e+00 3.000000000000000000e+00 2.115214843750000000e+02 3.125000000000000000e+01 6.375000000000000000e+01
2.700000000000000000e+01 5.890692307692307850e+02 3.228197937011718750e+02 -6.994323730468750000e-01 0.000000000000000000e+00 2.352941185235977173e-01 1.910149536132812500e+03 1.865679860115051270e+00 2.000000000000000000e+00 3.000000000000000000e+00 2.146151428222656250e+02 3.175000000000000000e+01 6.375000000000000000e+01
2.500000000000000000e+01 6.073846153846155858e+02 3.431170959472656250e+02 -6.653747558593750000e-01 0.000000000000000000e+00 2.941176593303680420e-01 1.903277709960937500e+03 1.840419888496398926e+00 2.000000000000000000e+00 3.000000000000000000e+00 1.376033935546875000e+02 3.275000000000000000e+01 6.375000000000000000e+01
1.400000000000000000e+01 1.125800000000000637e+03 3.090567932128906250e+02 3.018035888671875000e+00 0.000000000000000000e+00 0.000000000000000000e+00 1.619608276367187500e+03 1.444431066513061523e+00 2.000000000000000000e+00 1.000000000000000000e+00 3.992171325683593750e+02 -2.075000000000000000e+01 6.425000000000000000e+01
1.200000000000000000e+01 1.037353846153845780e+03 3.126561584472656250e+02 2.674560546875000000e+00 0.000000000000000000e+00 0.000000000000000000e+00 1.538447998046875000e+03 1.318220496177673340e+00 3.000000000000000000e+00 1.000000000000000000e+00 1.516689910888671875e+02 -2.025000000000000000e+01 6.425000000000000000e+01
1.200000000000000000e+01 1.076576923076922867e+03 3.187785949707031250e+02 2.370178222656250000e+00 0.000000000000000000e+00 0.000000000000000000e+00 1.466419799804687500e+03 1.024063706398010254e+00 3.000000000000000000e+00 1.000000000000000000e+00 5.347367553710937500e+02 -1.975000000000000000e+01 6.425000000000000000e+01
5.000000000000000000e+00 1.217953846153846371e+03 3.398368530273437500e+02 2.065795898437500000e+00 0.000000000000000000e+00 0.000000000000000000e+00 1.394391601562500000e+03 1.778747677803039551e+00 3.000000000000000000e+00 1.000000000000000000e+00 4.475121459960937500e+02 -1.925000000000000000e+01 6.425000000000000000e+01
7.000000000000000000e+00 1.256238461538461706e+03 5.081351623535156250e+02 2.418518066406250000e+00 0.000000000000000000e+00 0.000000000000000000e+00 1.671372192382812500e+03 1.817203402519226074e+00 2.000000000000000000e+00 1.000000000000000000e+00 2.141072845458984375e+02 1.075000000000000000e+01 6.425000000000000000e+01
2.500000000000000000e+01 1.379238461538461934e+03 5.382075195312500000e+02 1.575714111328125000e+00 0.000000000000000000e+00 0.000000000000000000e+00 1.538003906250000000e+03 1.790581583976745605e+00 2.000000000000000000e+00 3.000000000000000000e+00 1.697351837158203125e+02 1.125000000000000000e+01 6.425000000000000000e+01
1.200000000000000000e+01 1.423015384615384619e+03 5.440800781250000000e+02 9.738769531250000000e-01 0.000000000000000000e+00 0.000000000000000000e+00 1.471344848632812500e+03 1.753084659576416016e+00 2.000000000000000000e+00 1.000000000000000000e+00 3.494855957031250000e+02 1.175000000000000000e+01 6.425000000000000000e+01
1.400000000000000000e+01 1.114630769230768919e+03 5.500403442382812500e+02 -2.297668457031250000e-01 0.000000000000000000e+00 0.000000000000000000e+00 1.338026855468750000e+03 1.305934786796569824e+00 2.000000000000000000e+00 1.000000000000000000e+00 4.442698059082031250e+02 1.275000000000000000e+01 6.425000000000000000e+01
3.000000000000000000e+00 9.073615384615387711e+02 5.348737792968750000e+02 -7.346496582031250000e-01 0.000000000000000000e+00 0.000000000000000000e+00 1.289845581054687500e+03 1.289565324783325195e+00 2.000000000000000000e+00 1.000000000000000000e+00 7.592757568359375000e+02 1.325000000000000000e+01 6.425000000000000000e+01
1.200000000000000000e+01 7.990846153846152902e+02 4.985756530761718750e+02 -9.486999511718750000e-01 0.000000000000000000e+00 0.000000000000000000e+00 1.297097290039062500e+03 1.534294128417968750e+00 1.200000000000000000e+01 1.000000000000000000e+00 4.903238220214843750e+02 1.375000000000000000e+01 6.425000000000000000e+01
9.000000000000000000e+00 6.784846153846151537e+02 4.679735717773437500e+02 -1.162780761718750000e+00 9.999999776482582092e-03 0.000000000000000000e+00 1.304348876953125000e+03 1.373144507408142090e+00 2.000000000000000000e+00 1.000000000000000000e+00 8.228494262695312500e+02 1.425000000000000000e+01 6.425000000000000000e+01
5.400000000000000000e+01 6.318999999999997499e+02 4.444480895996093750e+02 -1.376861572265625000e+00 9.999999776482582092e-03 0.000000000000000000e+00 1.311600585937500000e+03 1.597109675407409668e+00 2.000000000000000000e+00 4.000000000000000000e+00 4.570018005371093750e+02 1.475000000000000000e+01 6.425000000000000000e+01
5.100000000000000000e+01 5.738769230769231626e+02 4.045143432617187500e+02 -1.402130126953125000e+00 0.000000000000000000e+00 0.000000000000000000e+00 1.338975341796875000e+03 1.691583991050720215e+00 2.000000000000000000e+00 4.000000000000000000e+00 3.401780395507812500e+02 1.525000000000000000e+01 6.425000000000000000e+01
2.500000000000000000e+01 5.712461538461534474e+02 3.630040588378906250e+02 -1.238586425781250000e+00 0.000000000000000000e+00 0.000000000000000000e+00 1.386473388671875000e+03 1.728693127632141113e+00 2.000000000000000000e+00 3.000000000000000000e+00 3.033227844238281250e+02 1.575000000000000000e+01 6.425000000000000000e+01
6.100000000000000000e+01 5.869769230769230717e+02 3.388364562988281250e+02 -1.075042724609375000e+00 0.000000000000000000e+00 0.000000000000000000e+00 1.433971313476562500e+03 1.724068641662597656e+00 2.000000000000000000e+00 4.000000000000000000e+00 3.287763366699218750e+02 1.625000000000000000e+01 6.425000000000000000e+01
2.800000000000000000e+01 6.179076923076925141e+02 3.351011962890625000e+02 -9.114990234375000000e-01 0.000000000000000000e+00 0.000000000000000000e+00 1.481469238281250000e+03 1.711120724678039551e+00 2.000000000000000000e+00 3.000000000000000000e+00 3.619357604980468750e+02 1.675000000000000000e+01 6.425000000000000000e+01
5.800000000000000000e+01 6.436384615384615699e+02 3.334697570800781250e+02 -6.566162109375000000e-01 0.000000000000000000e+00 0.000000000000000000e+00 1.536511718750000000e+03 1.697744250297546387e+00 2.000000000000000000e+00 4.000000000000000000e+00 3.956334838867187500e+02 1.725000000000000000e+01 6.425000000000000000e+01
6.000000000000000000e+01 6.912923076923071903e+02 3.308549194335937500e+02 -3.713073730468750000e-01 0.000000000000000000e+00 0.000000000000000000e+00 1.594068969726562500e+03 1.691460371017456055e+00 2.000000000000000000e+00 4.000000000000000000e+00 3.735582885742187500e+02 1.775000000000000000e+01 6.425000000000000000e+01
3.500000000000000000e+01 6.789461538461538339e+02 3.261011962890625000e+02 -8.596801757812500000e-02 0.000000000000000000e+00 0.000000000000000000e+00 1.651626098632812500e+03 1.714438676834106445e+00 2.000000000000000000e+00 3.000000000000000000e+00 3.686510925292968750e+02 1.825000000000000000e+01 6.425000000000000000e+01
4.500000000000000000e+01 6.911461538461534246e+02 3.165710754394531250e+02 1.993713378906250000e-01 0.000000000000000000e+00 0.000000000000000000e+00 1.709183349609375000e+03 1.744523644447326660e+00 2.000000000000000000e+00 4.000000000000000000e+00 2.874364013671875000e+02 1.875000000000000000e+01 6.425000000000000000e+01
4.000000000000000000e+01 5.584615384615384528e+02 2.615571594238281250e+02 1.087982177734375000e+00 0.000000000000000000e+00 0.000000000000000000e+00 1.764680175781250000e+03 1.839897751808166504e+00 2.000000000000000000e+00 3.000000000000000000e+00 2.478454895019531250e+02 2.025000000000000000e+01 6.425000000000000000e+01
1.700000000000000000e+01 5.491692307692310351e+02 2.883740234375000000e+02 1.218414306640625000e+00 0.000000000000000000e+00 2.941176593303680420e-01 2.108583984375000000e+03 1.838332533836364746e+00 2.000000000000000000e+00 1.000000000000000000e+00 7.744907379150390625e+01 2.475000000000000000e+01 6.425000000000000000e+01
3.700000000000000000e+01 5.147615384615385210e+02 2.955060119628906250e+02 1.033691406250000000e+00 0.000000000000000000e+00 0.000000000000000000e+00 2.093327148437500000e+03 1.482245445251464844e+00 2.000000000000000000e+00 3.000000000000000000e+00 1.390355529785156250e+02 2.525000000000000000e+01 6.425000000000000000e+01
5.200000000000000000e+01 5.117076923076922412e+02 2.954735107421875000e+02 8.489990234375000000e-01 0.000000000000000000e+00 0.000000000000000000e+00 2.078070312500000000e+03 1.918675422668457031e+00 2.000000000000000000e+00 4.000000000000000000e+00 9.307792663574218750e+01 2.575000000000000000e+01 6.425000000000000000e+01
3.600000000000000000e+01 5.254615384615385665e+02 2.897294921875000000e+02 6.643066406250000000e-01 0.000000000000000000e+00 0.000000000000000000e+00 2.062813232421875000e+03 1.924997091293334961e+00 2.000000000000000000e+00 3.000000000000000000e+00 1.186605834960937500e+02 2.625000000000000000e+01 6.425000000000000000e+01
4.000000000000000000e+01 5.324384615384614108e+02 2.814220886230468750e+02 4.714050292968750000e-01 0.000000000000000000e+00 2.941176593303680420e-01 2.039363891601562500e+03 1.934235215187072754e+00 2.000000000000000000e+00 3.000000000000000000e+00 1.456351165771484375e+02 2.675000000000000000e+01 6.425000000000000000e+01
5.300000000000000000e+01 4.908923076923074404e+02 2.689432983398437500e+02 -9.661865234375000000e-02 0.000000000000000000e+00 5.882352963089942932e-02 1.969848266601562500e+03 1.919894695281982422e+00 2.000000000000000000e+00 4.000000000000000000e+00 2.107081451416015625e+02 2.825000000000000000e+01 6.425000000000000000e+01
5.000000000000000000e+01 5.714769230769228443e+02 3.141238403320312500e+02 -6.545104980468750000e-01 0.000000000000000000e+00 5.882352963089942932e-02 1.893429565429687500e+03 1.891425609588623047e+00 1.500000000000000000e+01 4.000000000000000000e+00 2.432064514160156250e+02 3.025000000000000000e+01 6.425000000000000000e+01
1.200000000000000000e+01 5.439538461538459160e+02 3.185072937011718750e+02 -7.166137695312500000e-01 9.999999776482582092e-03 5.882352963089942932e-02 1.881426757812500000e+03 1.883729219436645508e+00 2.000000000000000000e+00 1.000000000000000000e+00 2.489973297119140625e+02 3.075000000000000000e+01 6.425000000000000000e+01
2.500000000000000000e+01 5.739076923076919456e+02 3.201471557617187500e+02 -7.786865234375000000e-01 0.000000000000000000e+00 5.882352963089942932e-02 1.869424072265625000e+03 1.866896271705627441e+00 2.000000000000000000e+00 3.000000000000000000e+00 1.989696044921875000e+02 3.125000000000000000e+01 6.425000000000000000e+01
2.600000000000000000e+01 6.167923076923071903e+02 3.219837036132812500e+02 -8.407897949218750000e-01 0.000000000000000000e+00 5.882352963089942932e-02 1.857421386718750000e+03 1.840388774871826172e+00 2.000000000000000000e+00 3.000000000000000000e+00 1.727124938964843750e+02 3.175000000000000000e+01 6.425000000000000000e+01
2.700000000000000000e+01 6.096307692307691468e+02 3.254209289550781250e+02 -8.338623046875000000e-01 0.000000000000000000e+00 0.000000000000000000e+00 1.852360961914062500e+03 1.817734718322753906e+00 2.000000000000000000e+00 3.000000000000000000e+00 1.828653717041015625e+02 3.225000000000000000e+01 6.425000000000000000e+01
2.100000000000000000e+01 6.077153846153844370e+02 3.291191101074218750e+02 -8.039245605468750000e-01 0.000000000000000000e+00 0.000000000000000000e+00 1.849614501953125000e+03 1.806619286537170410e+00 1.500000000000000000e+01 3.000000000000000000e+00 1.515290527343750000e+02 3.275000000000000000e+01 6.425000000000000000e+01
1.800000000000000000e+01 8.631769230769235719e+02 2.288831176757812500e+02 3.032531738281250000e+00 0.000000000000000000e+00 0.000000000000000000e+00 1.583390502929687500e+03 1.192536830902099609e+00 2.000000000000000000e+00 1.000000000000000000e+00 3.263043212890625000e+02 -2.125000000000000000e+01 6.475000000000000000e+01
1.200000000000000000e+01 8.967384615384617064e+02 2.302802581787109375e+02 2.714599609375000000e+00 0.000000000000000000e+00 0.000000000000000000e+00 1.485608520507812500e+03 1.662363529205322266e+00 1.300000000000000000e+01 1.000000000000000000e+00 4.335363464355468750e+02 -2.075000000000000000e+01 6.475000000000000000e+01
2.000000000000000000e+00 9.373538461538457796e+02 2.259619750976562500e+02 2.349273681640625000e+00 0.000000000000000000e+00 0.000000000000000000e+00 1.412128906250000000e+03 1.744868874549865723e+00 3.000000000000000000e+00 1.000000000000000000e+00 7.430895996093750000e+02 -2.025000000000000000e+01 6.475000000000000000e+01
7.000000000000000000e+00 9.808538461538463480e+02 2.489922027587890625e+02 1.587036132812500000e+00 0.000000000000000000e+00 0.000000000000000000e+00 1.281370971679687500e+03 1.302742838859558105e+00 3.000000000000000000e+00 1.000000000000000000e+00 7.043524780273437500e+02 -1.925000000000000000e+01 6.475000000000000000e+01
0.000000000000000000e+00 1.609176923076923003e+03 3.413052062988281250e+02 2.579284667968750000e+00 0.000000000000000000e+00 0.000000000000000000e+00 1.460018432617187500e+03 8.693979978561401367e-01 0.000000000000000000e+00 1.000000000000000000e+00 7.900456542968750000e+02 -1.575000000000000000e+01 6.475000000000000000e+01
4.000000000000000000e+00 1.648953846153847280e+03 3.512235107421875000e+02 2.712951660156250000e+00 0.000000000000000000e+00 0.000000000000000000e+00 1.476850097656250000e+03 7.534545660018920898e-01 0.000000000000000000e+00 1.000000000000000000e+00 7.752725830078125000e+02 -1.525000000000000000e+01 6.475000000000000000e+01
1.400000000000000000e+01 1.597284615384614654e+03 5.779714355468750000e+02 1.089813232421875000e+00 0.000000000000000000e+00 0.000000000000000000e+00 1.491078125000000000e+03 1.522217750549316406e+00 2.000000000000000000e+00 1.000000000000000000e+00 2.758810119628906250e+02 1.225000000000000000e+01 6.475000000000000000e+01
7.000000000000000000e+00 1.418984615384615836e+03 5.880942382812500000e+02 3.459472656250000000e-01 0.000000000000000000e+00 0.000000000000000000e+00 1.397053344726562500e+03 1.362407207489013672e+00 2.000000000000000000e+00 1.000000000000000000e+00 3.497665710449218750e+02 1.275000000000000000e+01 6.475000000000000000e+01
6.000000000000000000e+00 7.469999999999997726e+02 5.119829406738281250e+02 -1.069183349609375000e+00 9.999999776482582092e-03 0.000000000000000000e+00 1.265729614257812500e+03 1.246245980262756348e+00 1.200000000000000000e+01 1.000000000000000000e+00 5.967214965820312500e+02 1.425000000000000000e+01 6.475000000000000000e+01
4.000000000000000000e+01 6.495846153846157449e+02 4.569115905761718750e+02 -1.619232177734375000e+00 0.000000000000000000e+00 0.000000000000000000e+00 1.246643066406250000e+03 1.568230152130126953e+00 2.000000000000000000e+00 3.000000000000000000e+00 5.347094726562500000e+02 1.525000000000000000e+01 6.475000000000000000e+01
3.500000000000000000e+01 6.191153846153847553e+02 3.283541870117187500e+02 -1.490692138671875000e+00 9.999999776482582092e-03 0.000000000000000000e+00 1.375343872070312500e+03 1.635096907615661621e+00 2.000000000000000000e+00 3.000000000000000000e+00 4.055333251953125000e+02 1.675000000000000000e+01 6.475000000000000000e+01
2.700000000000000000e+01 6.423538461538458932e+02 3.251457519531250000e+02 -1.319946289062500000e+00 9.999999776482582092e-03 0.000000000000000000e+00 1.426509643554687500e+03 1.637337923049926758e+00 2.000000000000000000e+00 3.000000000000000000e+00 5.096763305664062500e+02 1.725000000000000000e+01 6.475000000000000000e+01
4.500000000000000000e+01 6.457615384615382936e+02 3.300866394042968750e+02 -1.106597900390625000e+00 9.999999776482582092e-03 0.000000000000000000e+00 1.480430541992187500e+03 1.651580691337585449e+00 2.000000000000000000e+00 4.000000000000000000e+00 4.521448059082031250e+02 1.775000000000000000e+01 6.475000000000000000e+01
4.000000000000000000e+01 6.309153846153850509e+02 3.331583557128906250e+02 -8.932495117187500000e-01 0.000000000000000000e+00 0.000000000000000000e+00 1.534351562500000000e+03 1.691624879837036133e+00 2.000000000000000000e+00 3.000000000000000000e+00 3.015646362304687500e+02 1.825000000000000000e+01 6.475000000000000000e+01
3.200000000000000000e+01 6.195999999999999091e+02 3.308290405273437500e+02 -6.799316406250000000e-01 0.000000000000000000e+00 0.000000000000000000e+00 1.588272460937500000e+03 1.729736089706420898e+00 2.000000000000000000e+00 3.000000000000000000e+00 2.876561279296875000e+02 1.875000000000000000e+01 6.475000000000000000e+01
3.400000000000000000e+01 6.156384615384615699e+02 3.161475830078125000e+02 -4.387207031250000000e-01 0.000000000000000000e+00 0.000000000000000000e+00 1.614161132812500000e+03 1.755744934082031250e+00 2.000000000000000000e+00 3.000000000000000000e+00 2.375438537597656250e+02 1.925000000000000000e+01 6.475000000000000000e+01
2.500000000000000000e+01 6.241538461538461888e+02 2.894904785156250000e+02 -1.975097656250000000e-01 0.000000000000000000e+00 0.000000000000000000e+00 1.640049926757812500e+03 1.786009788513183594e+00 2.000000000000000000e+00 3.000000000000000000e+00 3.026136779785156250e+02 1.975000000000000000e+01 6.475000000000000000e+01
3.600000000000000000e+01 5.347461538461540158e+02 2.659955139160156250e+02 4.367065429687500000e-02 0.000000000000000000e+00 0.000000000000000000e+00 1.665938598632812500e+03 1.824469923973083496e+00 2.000000000000000000e+00 3.000000000000000000e+00 2.344207153320312500e+02 2.025000000000000000e+01 6.475000000000000000e+01
4.000000000000000000e+01 5.398461538461540385e+02 2.884109802246093750e+02 1.602172851562500000e-01 0.000000000000000000e+00 0.000000000000000000e+00 1.976894775390625000e+03 1.892482042312622070e+00 2.000000000000000000e+00 3.000000000000000000e+00 8.217298126220703125e+01 2.625000000000000000e+01 6.475000000000000000e+01
4.300000000000000000e+01 5.418076923076923777e+02 2.900588378906250000e+02 1.748657226562500000e-02 0.000000000000000000e+00 0.000000000000000000e+00 1.958881225585937500e+03 3.635490238666534424e-01 2.000000000000000000e+00 3.000000000000000000e+00 1.325634155273437500e+02 2.675000000000000000e+01 6.475000000000000000e+01
3.100000000000000000e+01 4.927230769230769170e+02 2.845936584472656250e+02 -2.679748535156250000e-01 0.000000000000000000e+00 0.000000000000000000e+00 1.922854003906250000e+03 1.891495704650878906e+00 2.000000000000000000e+00 3.000000000000000000e+00 1.801802520751953125e+02 2.775000000000000000e+01 6.475000000000000000e+01
1.100000000000000000e+01 4.842923076923074177e+02 2.876030578613281250e+02 -4.037780761718750000e-01 0.000000000000000000e+00 0.000000000000000000e+00 1.905192749023437500e+03 1.884012579917907715e+00 2.000000000000000000e+00 1.000000000000000000e+00 2.311360778808593750e+02 2.825000000000000000e+01 6.475000000000000000e+01
5.500000000000000000e+01 4.897000000000001023e+02 2.981849975585937500e+02 -5.187988281250000000e-01 0.000000000000000000e+00 0.000000000000000000e+00 1.888588500976562500e+03 1.879702687263488770e+00 2.000000000000000000e+00 4.000000000000000000e+00 1.914920043945312500e+02 2.875000000000000000e+01 6.475000000000000000e+01
2.000000000000000000e+01 4.945000000000000568e+02 3.183489379882812500e+02 -7.488708496093750000e-01 9.999999776482582092e-03 0.000000000000000000e+00 1.855380126953125000e+03 1.863865971565246582e+00 1.500000000000000000e+01 3.000000000000000000e+00 2.225198516845703125e+02 2.975000000000000000e+01 6.475000000000000000e+01
2.700000000000000000e+01 5.777769230769227988e+02 3.236865844726562500e+02 -8.311767578125000000e-01 9.999999776482582092e-03 0.000000000000000000e+00 1.841073730468750000e+03 1.845685124397277832e+00 1.500000000000000000e+01 3.000000000000000000e+00 2.182989501953125000e+02 3.025000000000000000e+01 6.475000000000000000e+01
2.400000000000000000e+01 5.651538461538464162e+02 3.263945617675781250e+02 -9.302368164062500000e-01 0.000000000000000000e+00 5.882352963089942932e-02 1.817056640625000000e+03 1.828905940055847168e+00 2.000000000000000000e+00 3.000000000000000000e+00 1.697562713623046875e+02 3.125000000000000000e+01 6.475000000000000000e+01
4.800000000000000000e+01 6.026307692307691468e+02 3.259241027832031250e+02 -9.797668457031250000e-01 0.000000000000000000e+00 0.000000000000000000e+00 1.805048095703125000e+03 1.811722874641418457e+00 2.000000000000000000e+00 4.000000000000000000e+00 1.244473648071289062e+02 3.175000000000000000e+01 6.475000000000000000e+01
1.100000000000000000e+01 6.011615384615384983e+02 3.230905151367187500e+02 -9.687194824218750000e-01 0.000000000000000000e+00 0.000000000000000000e+00 1.799612548828125000e+03 1.794399857521057129e+00 2.000000000000000000e+00 1.000000000000000000e+00 1.189419631958007812e+02 3.225000000000000000e+01 6.475000000000000000e+01
3.500000000000000000e+01 6.004538461538461434e+02 3.159584655761718750e+02 -9.375000000000000000e-01 0.000000000000000000e+00 0.000000000000000000e+00 1.796368041992187500e+03 1.780562281608581543e+00 1.500000000000000000e+01 3.000000000000000000e+00 1.344677581787109375e+02 3.275000000000000000e+01 6.475000000000000000e+01
8.000000000000000000e+00 7.218692307692306258e+02 1.879222717285156250e+02 2.761566162109375000e+00 0.000000000000000000e+00 0.000000000000000000e+00 1.525623901367187500e+03 1.217799425125122070e+00 1.300000000000000000e+01 1.000000000000000000e+00 2.054495086669921875e+02 -2.175000000000000000e+01 6.525000000000000000e+01
5.000000000000000000e+00 6.561384615384613426e+02 1.828307037353515625e+02 2.586364746093750000e+00 0.000000000000000000e+00 0.000000000000000000e+00 1.438616455078125000e+03 1.192028284072875977e+00 2.000000000000000000e+00 1.000000000000000000e+00 1.552431793212890625e+02 -2.125000000000000000e+01 6.525000000000000000e+01
5.000000000000000000e+00 6.769846153846157222e+02 1.638663635253906250e+02 2.023986816406250000e+00 0.000000000000000000e+00 0.000000000000000000e+00 1.285809814453125000e+03 1.371523499488830566e+00 3.000000000000000000e+00 1.000000000000000000e+00 3.925848999023437500e+02 -2.025000000000000000e+01 6.525000000000000000e+01
1.000000000000000000e+01 7.228384615384615017e+02 1.755065307617187500e+02 1.108276367187500000e+00 0.000000000000000000e+00 0.000000000000000000e+00 1.168350463867187500e+03 9.157359004020690918e-01 3.000000000000000000e+00 1.000000000000000000e+00 6.440389404296875000e+02 -1.925000000000000000e+01 6.525000000000000000e+01
1.100000000000000000e+01 9.083769230769235037e+02 1.780117187500000000e+02 6.504211425781250000e-01 0.000000000000000000e+00 0.000000000000000000e+00 1.109620727539062500e+03 1.029428839683532715e+00 1.300000000000000000e+01 1.000000000000000000e+00 6.010365600585937500e+02 -1.875000000000000000e+01 6.525000000000000000e+01
0.000000000000000000e+00 1.016638461538461115e+03 1.771509399414062500e+02 8.069152832031250000e-01 0.000000000000000000e+00 0.000000000000000000e+00 1.140897583007812500e+03 1.366144061088562012e+00 1.300000000000000000e+01 1.000000000000000000e+00 7.109223022460937500e+02 -1.825000000000000000e+01 6.525000000000000000e+01
4.000000000000000000e+00 1.077561538461538021e+03 1.724125518798828125e+02 9.634094238281250000e-01 9.999999776482582092e-03 0.000000000000000000e+00 1.172174316406250000e+03 1.734204053878784180e+00 1.300000000000000000e+01 1.000000000000000000e+00 9.295944213867187500e+02 -1.775000000000000000e+01 6.525000000000000000e+01
3.000000000000000000e+00 1.057853846153845780e+03 1.672099304199218750e+02 1.119903564453125000e+00 0.000000000000000000e+00 0.000000000000000000e+00 1.203451171875000000e+03 2.018793582916259766e+00 1.300000000000000000e+01 1.000000000000000000e+00 4.782705993652343750e+02 -1.725000000000000000e+01 6.525000000000000000e+01
4.000000000000000000e+00 1.205446153846153265e+03 1.805132446289062500e+02 1.421600341796875000e+00 0.000000000000000000e+00 0.000000000000000000e+00 1.240744384765625000e+03 1.963984489440917969e+00 1.300000000000000000e+01 1.000000000000000000e+00 5.181220092773437500e+02 -1.625000000000000000e+01 6.525000000000000000e+01
2.000000000000000000e+00 1.329469230769230762e+03 2.127086639404296875e+02 1.569091796875000000e+00 9.999999776482582092e-03 0.000000000000000000e+00 1.251812866210937500e+03 1.474558949470520020e+00 3.000000000000000000e+00 1.000000000000000000e+00 6.853198852539062500e+02 -1.575000000000000000e+01 6.525000000000000000e+01
3.000000000000000000e+00 1.416000000000000227e+03 2.627958374023437500e+02 1.716552734375000000e+00 0.000000000000000000e+00 0.000000000000000000e+00 1.262881347656250000e+03 8.109716176986694336e-01 2.000000000000000000e+00 1.000000000000000000e+00 4.910818786621093750e+02 -1.525000000000000000e+01 6.525000000000000000e+01
0.000000000000000000e+00 1.455700000000000728e+03 3.007977905273437500e+02 2.059204101562500000e+00 0.000000000000000000e+00 0.000000000000000000e+00 1.315539672851562500e+03 9.070860147476196289e-01 1.300000000000000000e+01 1.000000000000000000e+00 5.963499755859375000e+02 -1.475000000000000000e+01 6.525000000000000000e+01
2.500000000000000000e+01 1.527207692307692469e+03 6.144857788085937500e+02 1.202087402343750000e-01 0.000000000000000000e+00 0.000000000000000000e+00 1.349711547851562500e+03 1.265208005905151367e+00 2.000000000000000000e+00 3.000000000000000000e+00 4.165218505859375000e+02 1.325000000000000000e+01 6.525000000000000000e+01
0.000000000000000000e+00 1.314253846153845871e+03 6.034191284179687500e+02 -4.276733398437500000e-01 9.999999776482582092e-03 0.000000000000000000e+00 1.288411010742187500e+03 9.776034355163574219e-01 2.000000000000000000e+00 1.000000000000000000e+00 9.867321166992187500e+02 1.375000000000000000e+01 6.525000000000000000e+01
2.000000000000000000e+00 8.400999999999999091e+02 5.447252807617187500e+02 -1.523468017578125000e+00 9.999999776482582092e-03 0.000000000000000000e+00 1.165809814453125000e+03 1.166129946708679199e+00 1.200000000000000000e+01 1.000000000000000000e+00 7.229309082031250000e+02 1.475000000000000000e+01 6.525000000000000000e+01
8.000000000000000000e+00 8.416230769230767237e+02 4.999294738769531250e+02 -1.836334228515625000e+00 1.216201707720756531e-01 0.000000000000000000e+00 1.154310913085937500e+03 1.208999514579772949e+00 1.200000000000000000e+01 1.000000000000000000e+00 7.198930664062500000e+02 1.525000000000000000e+01 6.525000000000000000e+01
4.600000000000000000e+01 7.794461538461538339e+02 4.388064270019531250e+02 -1.914154052734375000e+00 9.999999776482582092e-03 0.000000000000000000e+00 1.192613403320312500e+03 1.398482799530029297e+00 2.000000000000000000e+00 4.000000000000000000e+00 5.336356201171875000e+02 1.575000000000000000e+01 6.525000000000000000e+01
2.500000000000000000e+01 6.767846153846154493e+02 3.846049499511718750e+02 -1.992004394531250000e+00 9.999999776482582092e-03 0.000000000000000000e+00 1.230915893554687500e+03 1.538214802742004395e+00 2.000000000000000000e+00 3.000000000000000000e+00 5.388798217773437500e+02 1.625000000000000000e+01 6.525000000000000000e+01
3.800000000000000000e+01 6.211230769230769511e+02 3.397965393066406250e+02 -1.841918945312500000e+00 9.999999776482582092e-03 0.000000000000000000e+00 1.366792236328125000e+03 1.626199245452880859e+00 2.000000000000000000e+00 3.000000000000000000e+00 3.971585083007812500e+02 1.775000000000000000e+01 6.525000000000000000e+01
3.000000000000000000e+01 5.684461538461537202e+02 3.369010009765625000e+02 -1.700561523437500000e+00 0.000000000000000000e+00 0.000000000000000000e+00 1.417076904296875000e+03 1.671965003013610840e+00 2.000000000000000000e+00 3.000000000000000000e+00 3.674123840332031250e+02 1.825000000000000000e+01 6.525000000000000000e+01
4.000000000000000000e+01 5.801692307692309214e+02 3.275812377929687500e+02 -1.559204101562500000e+00 0.000000000000000000e+00 0.000000000000000000e+00 1.467361572265625000e+03 1.703010678291320801e+00 2.000000000000000000e+00 3.000000000000000000e+00 3.414679565429687500e+02 1.875000000000000000e+01 6.525000000000000000e+01
3.500000000000000000e+01 6.015846153846155175e+02 3.093922119140625000e+02 -1.373016357421875000e+00 0.000000000000000000e+00 0.000000000000000000e+00 1.500640014648437500e+03 1.707549810409545898e+00 2.000000000000000000e+00 3.000000000000000000e+00 3.228853454589843750e+02 1.925000000000000000e+01 6.525000000000000000e+01
5.300000000000000000e+01 5.975461538461538566e+02 2.860405273437500000e+02 -1.186798095703125000e+00 0.000000000000000000e+00 0.000000000000000000e+00 1.533918457031250000e+03 1.718575239181518555e+00 2.000000000000000000e+00 4.000000000000000000e+00 3.386597900390625000e+02 1.975000000000000000e+01 6.525000000000000000e+01
3.200000000000000000e+01 6.288769230769232763e+02 2.611182861328125000e+02 -1.000610351562500000e+00 0.000000000000000000e+00 0.000000000000000000e+00 1.567197021484375000e+03 1.741614341735839844e+00 2.000000000000000000e+00 3.000000000000000000e+00 2.864718933105468750e+02 2.025000000000000000e+01 6.525000000000000000e+01
4.900000000000000000e+01 5.238384615384617291e+02 2.812106628417968750e+02 -2.055358886718750000e-01 0.000000000000000000e+00 0.000000000000000000e+00 1.897738159179687500e+03 1.881572127342224121e+00 2.000000000000000000e+00 4.000000000000000000e+00 5.880527877807617188e+01 2.575000000000000000e+01 6.525000000000000000e+01
2.200000000000000000e+01 5.298153846153849145e+02 2.823760986328125000e+02 -3.438415527343750000e-01 0.000000000000000000e+00 0.000000000000000000e+00 1.890976318359375000e+03 1.863540291786193848e+00 1.500000000000000000e+01 3.000000000000000000e+00 1.221621170043945312e+02 2.625000000000000000e+01 6.525000000000000000e+01
2.200000000000000000e+01 5.977230769230770875e+02 2.827586669921875000e+02 -4.364318847656250000e-01 0.000000000000000000e+00 0.000000000000000000e+00 1.878398559570312500e+03 1.841183662414550781e+00 1.500000000000000000e+01 3.000000000000000000e+00 1.103928070068359375e+02 2.675000000000000000e+01 6.525000000000000000e+01
5.800000000000000000e+01 5.926461538461534246e+02 2.847895812988281250e+02 -5.290222167968750000e-01 0.000000000000000000e+00 0.000000000000000000e+00 1.865820678710937500e+03 1.814067244529724121e+00 1.500000000000000000e+01 4.000000000000000000e+00 1.299094390869140625e+02 2.725000000000000000e+01 6.525000000000000000e+01
4.400000000000000000e+01 5.752846153846154493e+02 2.893672790527343750e+02 -6.216125488281250000e-01 9.999999776482582092e-03 0.000000000000000000e+00 1.853242919921875000e+03 1.800803780555725098e+00 2.000000000000000000e+00 3.000000000000000000e+00 1.837162780761718750e+02 2.775000000000000000e+01 6.525000000000000000e+01
2.800000000000000000e+01 5.754000000000000909e+02 2.975392761230468750e+02 -7.109375000000000000e-01 9.999999776482582092e-03 0.000000000000000000e+00 1.840537231445312500e+03 1.775683045387268066e+00 2.000000000000000000e+00 3.000000000000000000e+00 2.482424468994140625e+02 2.825000000000000000e+01 6.525000000000000000e+01
2.200000000000000000e+01 6.029230769230766782e+02 3.090994567871093750e+02 -7.904663085937500000e-01 9.999999776482582092e-03 0.000000000000000000e+00 1.827448120117187500e+03 1.763574242591857910e+00 2.000000000000000000e+00 3.000000000000000000e+00 2.661954040527343750e+02 2.875000000000000000e+01 6.525000000000000000e+01
3.800000000000000000e+01 5.900846153846154039e+02 3.189962463378906250e+02 -8.699951171875000000e-01 9.999999776482582092e-03 0.000000000000000000e+00 1.814359008789062500e+03 1.757233023643493652e+00 1.500000000000000000e+01 3.000000000000000000e+00 2.213308410644531250e+02 2.925000000000000000e+01 6.525000000000000000e+01
4.400000000000000000e+01 6.059461538461537202e+02 3.245145874023437500e+02 -9.495239257812500000e-01 9.999999776482582092e-03 0.000000000000000000e+00 1.801269775390625000e+03 1.764056324958801270e+00 1.500000000000000000e+01 3.000000000000000000e+00 2.267017822265625000e+02 2.975000000000000000e+01 6.525000000000000000e+01
5.700000000000000000e+01 5.706999999999999318e+02 3.277405395507812500e+02 -1.007812500000000000e+00 9.999999776482582092e-03 0.000000000000000000e+00 1.788718017578125000e+03 1.779510498046875000e+00 2.000000000000000000e+00 4.000000000000000000e+00 1.366373138427734375e+02 3.025000000000000000e+01 6.525000000000000000e+01
4.300000000000000000e+01 5.813769230769232763e+02 3.299348754882812500e+02 -1.044799804687500000e+00 0.000000000000000000e+00 0.000000000000000000e+00 1.776703613281250000e+03 1.789689421653747559e+00 2.000000000000000000e+00 3.000000000000000000e+00 1.563713684082031250e+02 3.075000000000000000e+01 6.525000000000000000e+01
5.000000000000000000e+01 5.627615384615385210e+02 3.304027404785156250e+02 -1.081787109375000000e+00 0.000000000000000000e+00 0.000000000000000000e+00 1.764689208984375000e+03 1.790732860565185547e+00 2.000000000000000000e+00 4.000000000000000000e+00 1.524338989257812500e+02 3.125000000000000000e+01 6.525000000000000000e+01
2.900000000000000000e+01 5.948153846153848008e+02 3.278566894531250000e+02 -1.118774414062500000e+00 0.000000000000000000e+00 0.000000000000000000e+00 1.752674804687500000e+03 1.783844351768493652e+00 2.000000000000000000e+00 3.000000000000000000e+00 1.466884918212890625e+02 3.175000000000000000e+01 6.525000000000000000e+01
5.500000000000000000e+01 5.705153846153847326e+02 3.181809692382812500e+02 -1.103607177734375000e+00 9.999999776482582092e-03 0.000000000000000000e+00 1.746864257812500000e+03 1.780142903327941895e+00 2.000000000000000000e+00 4.000000000000000000e+00 1.441010589599609375e+02 3.225000000000000000e+01 6.525000000000000000e+01
2.600000000000000000e+01 5.611076923076922185e+02 2.976885681152343750e+02 -1.071044921875000000e+00 0.000000000000000000e+00 0.000000000000000000e+00 1.743121582031250000e+03 1.776419162750244141e+00 2.000000000000000000e+00 3.000000000000000000e+00 1.110244827270507812e+02 3.275000000000000000e+01 6.525000000000000000e+01
1.200000000000000000e+01 7.918538461538463480e+02 1.961545104980468750e+02 2.218322753906250000e+00 0.000000000000000000e+00 0.000000000000000000e+00 1.445902099609375000e+03 1.009515404701232910e+00 1.300000000000000000e+01 1.000000000000000000e+00 3.549096069335937500e+02 -2.225000000000000000e+01 6.575000000000000000e+01
0.000000000000000000e+00 7.833230769230771102e+02 1.444517974853515625e+02 1.429748535156250000e-01 2.127739787101745605e-01 0.000000000000000000e+00 1.007338867187500000e+03 8.066661357879638672e-01 1.300000000000000000e+01 1.000000000000000000e+00 6.473104858398437500e+02 -1.875000000000000000e+01 6.575000000000000000e+01
3.000000000000000000e+00 7.923461538461540385e+02 1.489067077636718750e+02 1.796264648437500000e-01 0.000000000000000000e+00 0.000000000000000000e+00 1.016513488769531250e+03 9.697657823562622070e-01 1.300000000000000000e+01 1.000000000000000000e+00 1.358496704101562500e+02 -1.825000000000000000e+01 6.575000000000000000e+01
0.000000000000000000e+00 8.682923076923076451e+02 1.473623962402343750e+02 2.162475585937500000e-01 1.055086180567741394e-01 0.000000000000000000e+00 1.025688110351562500e+03 1.109709620475769043e+00 1.300000000000000000e+01 1.000000000000000000e+00 6.649342651367187500e+02 -1.775000000000000000e+01 6.575000000000000000e+01
9.000000000000000000e+00 8.469692307692306485e+02 1.342995605468750000e+02 2.528991699218750000e-01 0.000000000000000000e+00 0.000000000000000000e+00 1.034862670898437500e+03 1.030185461044311523e+00 6.000000000000000000e+00 1.000000000000000000e+00 2.565407714843750000e+02 -1.725000000000000000e+01 6.575000000000000000e+01
3.000000000000000000e+00 9.630230769230767010e+02 1.205724105834960938e+02 3.202209472656250000e-01 9.999999776482582092e-03 0.000000000000000000e+00 1.043225952148437500e+03 8.347521424293518066e-01 1.300000000000000000e+01 1.000000000000000000e+00 5.840420532226562500e+02 -1.675000000000000000e+01 6.575000000000000000e+01
5.000000000000000000e+00 1.017046153846153857e+03 1.177299575805664062e+02 4.795227050781250000e-01 0.000000000000000000e+00 0.000000000000000000e+00 1.049155151367187500e+03 8.116138577461242676e-01 6.000000000000000000e+00 1.000000000000000000e+00 3.918112182617187500e+02 -1.625000000000000000e+01 6.575000000000000000e+01
0.000000000000000000e+00 1.248138461538461570e+03 1.459342041015625000e+02 6.388549804687500000e-01 9.999999776482582092e-03 0.000000000000000000e+00 1.055084350585937500e+03 7.907644510269165039e-01 2.000000000000000000e+00 1.000000000000000000e+00 6.876556396484375000e+02 -1.575000000000000000e+01 6.575000000000000000e+01
0.000000000000000000e+00 1.335215384615383982e+03 2.249312438964843750e+02 7.981872558593750000e-01 0.000000000000000000e+00 0.000000000000000000e+00 1.061013549804687500e+03 1.009505271911621094e+00 2.000000000000000000e+00 1.000000000000000000e+00 5.269054565429687500e+02 -1.525000000000000000e+01 6.575000000000000000e+01
6.300000000000000000e+01 1.882707692307692469e+03 5.970794067382812500e+02 5.743713378906250000e-01 0.000000000000000000e+00 0.000000000000000000e+00 1.383783813476562500e+03 1.297484159469604492e+00 2.000000000000000000e+00 4.000000000000000000e+00 1.564558105468750000e+02 1.325000000000000000e+01 6.575000000000000000e+01
0.000000000000000000e+00 1.731915384615384710e+03 5.784506835937500000e+02 -1.330566406250000000e-01 9.999999776482582092e-03 0.000000000000000000e+00 1.290571655273437500e+03 1.227271556854248047e+00 2.000000000000000000e+00 1.000000000000000000e+00 9.198356933593750000e+02 1.375000000000000000e+01 6.575000000000000000e+01
9.000000000000000000e+00 1.303115384615384983e+03 5.085787353515625000e+02 -1.547882080078125000e+00 9.999999776482582092e-03 0.000000000000000000e+00 1.104147460937500000e+03 1.130518794059753418e+00 1.200000000000000000e+01 1.000000000000000000e+00 5.754407958984375000e+02 1.475000000000000000e+01 6.575000000000000000e+01
6.000000000000000000e+00 9.139846153846153811e+02 4.432206115722656250e+02 -2.204956054687500000e+00 2.281049787998199463e-01 0.000000000000000000e+00 1.104514892578125000e+03 1.152173280715942383e+00 1.200000000000000000e+01 1.000000000000000000e+00 8.101453857421875000e+02 1.575000000000000000e+01 6.575000000000000000e+01
5.200000000000000000e+01 7.294846153846150401e+02 4.091124877929687500e+02 -2.407196044921875000e+00 9.999999776482582092e-03 0.000000000000000000e+00 1.135830566406250000e+03 1.321210741996765137e+00 2.000000000000000000e+00 4.000000000000000000e+00 6.358022460937500000e+02 1.625000000000000000e+01 6.575000000000000000e+01
4.300000000000000000e+01 6.685923076923075996e+02 3.726755676269531250e+02 -2.609436035156250000e+00 1.129820272326469421e-01 0.000000000000000000e+00 1.167146240234375000e+03 1.475030422210693359e+00 2.000000000000000000e+00 3.000000000000000000e+00 5.951240234375000000e+02 1.675000000000000000e+01 6.575000000000000000e+01
2.700000000000000000e+01 6.059615384615385665e+02 3.465900573730468750e+02 -2.610168457031250000e+00 9.999999776482582092e-03 0.000000000000000000e+00 1.209383422851562500e+03 1.552668094635009766e+00 2.000000000000000000e+00 3.000000000000000000e+00 4.359934082031250000e+02 1.725000000000000000e+01 6.575000000000000000e+01
4.200000000000000000e+01 5.847230769230770875e+02 3.152857971191406250e+02 -2.410797119140625000e+00 9.999999776482582092e-03 0.000000000000000000e+00 1.347016113281250000e+03 1.633744239807128906e+00 2.000000000000000000e+00 3.000000000000000000e+00 4.292567138671875000e+02 1.875000000000000000e+01 6.575000000000000000e+01
2.300000000000000000e+01 5.916307692307692605e+02 2.938018798828125000e+02 -2.279113769531250000e+00 9.999999776482582092e-03 0.000000000000000000e+00 1.387538330078125000e+03 1.648966670036315918e+00 2.000000000000000000e+00 3.000000000000000000e+00 4.414533691406250000e+02 1.925000000000000000e+01 6.575000000000000000e+01
2.500000000000000000e+01 5.845461538461536293e+02 2.681325683593750000e+02 -2.147399902343750000e+00 9.999999776482582092e-03 0.000000000000000000e+00 1.428060546875000000e+03 1.672792673110961914e+00 2.000000000000000000e+00 3.000000000000000000e+00 3.739767456054687500e+02 1.975000000000000000e+01 6.575000000000000000e+01
5.200000000000000000e+01 6.257153846153846644e+02 2.441600646972656250e+02 -1.840026855468750000e+00 9.999999776482582092e-03 0.000000000000000000e+00 1.513360473632812500e+03 1.738986730575561523e+00 2.000000000000000000e+00 4.000000000000000000e+00 2.027164154052734375e+02 2.075000000000000000e+01 6.575000000000000000e+01
4.800000000000000000e+01 5.754000000000000909e+02 2.441137390136718750e+02 -1.532440185546875000e+00 0.000000000000000000e+00 0.000000000000000000e+00 1.570904052734375000e+03 1.794365286827087402e+00 2.000000000000000000e+00 4.000000000000000000e+00 8.528439331054687500e+01 2.125000000000000000e+01 6.575000000000000000e+01
3.100000000000000000e+01 5.801307692307694879e+02 2.475598754882812500e+02 -1.224884033203125000e+00 0.000000000000000000e+00 0.000000000000000000e+00 1.628447631835937500e+03 1.833889603614807129e+00 2.000000000000000000e+00 3.000000000000000000e+00 1.685497283935546875e+01 2.175000000000000000e+01 6.575000000000000000e+01
3.000000000000000000e+00 5.308692307692307395e+02 3.426682434082031250e+02 -5.230102539062500000e-01 0.000000000000000000e+00 0.000000000000000000e+00 1.810527587890625000e+03 1.841201543807983398e+00 2.000000000000000000e+00 1.000000000000000000e+00 3.555147171020507812e+01 2.475000000000000000e+01 6.575000000000000000e+01
3.900000000000000000e+01 5.358461538461539249e+02 3.198717041015625000e+02 -6.354675292968750000e-01 0.000000000000000000e+00 0.000000000000000000e+00 1.808026367187500000e+03 1.844117641448974609e+00 1.500000000000000000e+01 3.000000000000000000e+00 5.422333908081054688e+01 2.525000000000000000e+01 6.575000000000000000e+01
2.300000000000000000e+01 5.261307692307692605e+02 2.981663818359375000e+02 -7.479248046875000000e-01 0.000000000000000000e+00 0.000000000000000000e+00 1.805525268554687500e+03 1.839573740959167480e+00 1.500000000000000000e+01 3.000000000000000000e+00 1.136164932250976562e+02 2.575000000000000000e+01 6.575000000000000000e+01
1.900000000000000000e+01 5.571461538461539931e+02 2.839150695800781250e+02 -8.604125976562500000e-01 0.000000000000000000e+00 0.000000000000000000e+00 1.803024047851562500e+03 1.822669029235839844e+00 1.500000000000000000e+01 1.000000000000000000e+00 1.437706756591796875e+02 2.625000000000000000e+01 6.575000000000000000e+01
2.500000000000000000e+01 5.848999999999997499e+02 2.736374816894531250e+02 -9.037170410156250000e-01 0.000000000000000000e+00 0.000000000000000000e+00 1.795748535156250000e+03 1.799697041511535645e+00 1.500000000000000000e+01 3.000000000000000000e+00 1.559677886962890625e+02 2.675000000000000000e+01 6.575000000000000000e+01
3.700000000000000000e+01 5.827461538461539021e+02 2.660326843261718750e+02 -9.470214843750000000e-01 9.999999776482582092e-03 0.000000000000000000e+00 1.788473022460937500e+03 1.771250724792480469e+00 1.500000000000000000e+01 3.000000000000000000e+00 1.504656219482421875e+02 2.725000000000000000e+01 6.575000000000000000e+01
4.200000000000000000e+01 5.965153846153847326e+02 2.630258178710937500e+02 -9.902954101562500000e-01 9.999999776482582092e-03 0.000000000000000000e+00 1.781197509765625000e+03 1.749912142753601074e+00 2.000000000000000000e+00 3.000000000000000000e+00 2.562934875488281250e+02 2.775000000000000000e+01 6.575000000000000000e+01
4.700000000000000000e+01 5.817692307692308304e+02 2.713352355957031250e+02 -1.033752441406250000e+00 9.999999776482582092e-03 0.000000000000000000e+00 1.773316284179687500e+03 1.728710055351257324e+00 2.000000000000000000e+00 4.000000000000000000e+00 3.014618835449218750e+02 2.825000000000000000e+01 6.575000000000000000e+01
3.900000000000000000e+01 6.031384615384612289e+02 2.861178894042968750e+02 -1.077606201171875000e+00 9.999999776482582092e-03 0.000000000000000000e+00 1.763617675781250000e+03 1.710902810096740723e+00 2.000000000000000000e+00 3.000000000000000000e+00 2.607010192871093750e+02 2.875000000000000000e+01 6.575000000000000000e+01
1.900000000000000000e+01 6.049461538461536065e+02 2.999394531250000000e+02 -1.121459960937500000e+00 9.999999776482582092e-03 0.000000000000000000e+00 1.753919067382812500e+03 1.704890847206115723e+00 2.000000000000000000e+00 1.000000000000000000e+00 2.644485168457031250e+02 2.925000000000000000e+01 6.575000000000000000e+01
5.100000000000000000e+01 6.250153846153846189e+02 3.104290466308593750e+02 -1.165313720703125000e+00 9.999999776482582092e-03 0.000000000000000000e+00 1.744220581054687500e+03 1.711750864982604980e+00 2.000000000000000000e+00 4.000000000000000000e+00 2.949555053710937500e+02 2.975000000000000000e+01 6.575000000000000000e+01
3.400000000000000000e+01 5.600615384615384755e+02 3.172064819335937500e+02 -1.198608398437500000e+00 9.999999776482582092e-03 0.000000000000000000e+00 1.733439941406250000e+03 1.737586617469787598e+00 2.000000000000000000e+00 3.000000000000000000e+00 2.732159118652343750e+02 3.025000000000000000e+01 6.575000000000000000e+01
2.800000000000000000e+01 5.777692307692304894e+02 3.217777404785156250e+02 -1.221343994140625000e+00 9.999999776482582092e-03 0.000000000000000000e+00 1.721577270507812500e+03 1.751939892768859863e+00 2.000000000000000000e+00 3.000000000000000000e+00 2.085758056640625000e+02 3.075000000000000000e+01 6.575000000000000000e+01
0.000000000000000000e+00 1.541169230769229898e+03 4.733256530761718750e+02 -9.693298339843750000e-01 9.999999776482582092e-03 0.000000000000000000e+00 1.181029785156250000e+03 1.158810019493103027e+00 1.200000000000000000e+01 1.000000000000000000e+00 6.264619750976562500e+02 1.475000000000000000e+01 6.625000000000000000e+01
1.100000000000000000e+01 1.315307692307692605e+03 4.404822082519531250e+02 -1.543518066406250000e+00 9.999999776482582092e-03 0.000000000000000000e+00 1.130480712890625000e+03 1.091593623161315918e+00 1.200000000000000000e+01 1.000000000000000000e+00 7.560955200195312500e+02 1.525000000000000000e+01 6.625000000000000000e+01
1.000000000000000000e+00 1.091923076923077133e+03 4.166140136718750000e+02 -1.916046142578125000e+00 2.580905556678771973e-01 0.000000000000000000e+00 1.125342407226562500e+03 1.297343015670776367e+00 1.200000000000000000e+01 1.000000000000000000e+00 1.089098022460937500e+03 1.575000000000000000e+01 6.625000000000000000e+01
3.600000000000000000e+01 6.544846153846150401e+02 3.603865966796875000e+02 -2.661071777343750000e+00 9.999999776482582092e-03 0.000000000000000000e+00 1.115065551757812500e+03 1.203799724578857422e+00 1.200000000000000000e+01 3.000000000000000000e+00 5.659382934570312500e+02 1.675000000000000000e+01 6.625000000000000000e+01
2.500000000000000000e+01 6.156923076923079634e+02 3.382506713867187500e+02 -2.787536621093750000e+00 9.999999776482582092e-03 0.000000000000000000e+00 1.137753540039062500e+03 1.452115178108215332e+00 1.200000000000000000e+01 3.000000000000000000e+00 4.548857116699218750e+02 1.725000000000000000e+01 6.625000000000000000e+01
4.700000000000000000e+01 6.016076923076921048e+02 3.178446960449218750e+02 -2.920776367187500000e+00 1.352724283933639526e-01 0.000000000000000000e+00 1.233643798828125000e+03 1.543601155281066895e+00 2.000000000000000000e+00 4.000000000000000000e+00 4.756726989746093750e+02 1.875000000000000000e+01 6.625000000000000000e+01
4.600000000000000000e+01 6.231769230769232308e+02 2.836787109375000000e+02 -2.754241943359375000e+00 1.150678321719169617e-01 0.000000000000000000e+00 1.325575439453125000e+03 1.603715062141418457e+00 2.000000000000000000e+00 4.000000000000000000e+00 4.474090881347656250e+02 1.975000000000000000e+01 6.625000000000000000e+01
5.400000000000000000e+01 5.885615384615383618e+02 2.709469909667968750e+02 -2.670959472656250000e+00 9.999999776482582092e-03 0.000000000000000000e+00 1.371541259765625000e+03 1.641556859016418457e+00 2.000000000000000000e+00 4.000000000000000000e+00 2.689270629882812500e+02 2.025000000000000000e+01 6.625000000000000000e+01
5.300000000000000000e+01 6.426307692307691468e+02 2.704591979980468750e+02 -2.546813964843750000e+00 9.999999776482582092e-03 0.000000000000000000e+00 1.418155395507812500e+03 1.665350437164306641e+00 2.000000000000000000e+00 4.000000000000000000e+00 1.817212829589843750e+02 2.075000000000000000e+01 6.625000000000000000e+01
2.800000000000000000e+01 6.153384615384613880e+02 2.736858520507812500e+02 -2.299957275390625000e+00 9.999999776482582092e-03 0.000000000000000000e+00 1.466714111328125000e+03 1.703508734703063965e+00 2.000000000000000000e+00 3.000000000000000000e+00 2.388956298828125000e+02 2.125000000000000000e+01 6.625000000000000000e+01
2.400000000000000000e+01 5.911461538461537657e+02 2.802343444824218750e+02 -2.053100585937500000e+00 0.000000000000000000e+00 0.000000000000000000e+00 1.515272827148437500e+03 1.744201540946960449e+00 2.000000000000000000e+00 3.000000000000000000e+00 8.808793640136718750e+01 2.175000000000000000e+01 6.625000000000000000e+01
1.800000000000000000e+01 5.965076923076924231e+02 2.909135131835937500e+02 -1.806243896484375000e+00 9.999999776482582092e-03 0.000000000000000000e+00 1.563831542968750000e+03 1.764814734458923340e+00 2.000000000000000000e+00 1.000000000000000000e+00 2.190883636474609375e+02 2.225000000000000000e+01 6.625000000000000000e+01
5.600000000000000000e+01 6.052769230769230262e+02 3.013290100097656250e+02 -1.635711669921875000e+00 0.000000000000000000e+00 0.000000000000000000e+00 1.600733764648437500e+03 1.782672762870788574e+00 2.000000000000000000e+00 4.000000000000000000e+00 1.030913925170898438e+02 2.275000000000000000e+01 6.625000000000000000e+01
3.400000000000000000e+01 5.993230769230767692e+02 3.115910339355468750e+02 -1.541564941406250000e+00 0.000000000000000000e+00 0.000000000000000000e+00 1.625979492187500000e+03 1.796324014663696289e+00 2.000000000000000000e+00 3.000000000000000000e+00 1.330700683593750000e+02 2.325000000000000000e+01 6.625000000000000000e+01
4.900000000000000000e+01 5.939769230769230717e+02 3.252043457031250000e+02 -1.447387695312500000e+00 0.000000000000000000e+00 0.000000000000000000e+00 1.651225219726562500e+03 1.808336734771728516e+00 2.000000000000000000e+00 4.000000000000000000e+00 1.062004394531250000e+02 2.375000000000000000e+01 6.625000000000000000e+01
5.000000000000000000e+01 5.644769230769230717e+02 3.324208068847656250e+02 -1.353240966796875000e+00 0.000000000000000000e+00 0.000000000000000000e+00 1.676470947265625000e+03 1.817276835441589355e+00 1.500000000000000000e+01 4.000000000000000000e+00 1.170410766601562500e+02 2.425000000000000000e+01 6.625000000000000000e+01
4.800000000000000000e+01 5.275692307692308987e+02 3.212896728515625000e+02 -1.369934082031250000e+00 0.000000000000000000e+00 0.000000000000000000e+00 1.684223388671875000e+03 1.822737336158752441e+00 1.500000000000000000e+01 4.000000000000000000e+00 1.017746658325195312e+02 2.475000000000000000e+01 6.625000000000000000e+01
5.500000000000000000e+01 5.077846153846153925e+02 2.962174377441406250e+02 -1.423553466796875000e+00 0.000000000000000000e+00 0.000000000000000000e+00 1.686144775390625000e+03 1.828942298889160156e+00 2.000000000000000000e+00 4.000000000000000000e+00 7.301447296142578125e+01 2.525000000000000000e+01 6.625000000000000000e+01
4.100000000000000000e+01 5.050153846153845052e+02 2.650395812988281250e+02 -1.530853271484375000e+00 9.999999776482582092e-03 0.000000000000000000e+00 1.689987670898437500e+03 1.819800615310668945e+00 2.000000000000000000e+00 3.000000000000000000e+00 1.968499450683593750e+02 2.625000000000000000e+01 6.625000000000000000e+01
3.500000000000000000e+01 4.944846153846150969e+02 2.595506896972656250e+02 -1.535491943359375000e+00 9.999999776482582092e-03 0.000000000000000000e+00 1.686367675781250000e+03 1.793108344078063965e+00 1.500000000000000000e+01 3.000000000000000000e+00 1.963323669433593750e+02 2.675000000000000000e+01 6.625000000000000000e+01
3.700000000000000000e+01 5.671615384615381572e+02 2.543236541748046875e+02 -1.540161132812500000e+00 9.999999776482582092e-03 0.000000000000000000e+00 1.682747802734375000e+03 1.751936316490173340e+00 1.500000000000000000e+01 3.000000000000000000e+00 1.904037170410156250e+02 2.725000000000000000e+01 6.625000000000000000e+01
2.500000000000000000e+01 5.741153846153846416e+02 2.491791229248046875e+02 -1.544799804687500000e+00 9.999999776482582092e-03 0.000000000000000000e+00 1.679127807617187500e+03 1.713652610778808594e+00 2.000000000000000000e+00 3.000000000000000000e+00 2.917405700683593750e+02 2.775000000000000000e+01 6.625000000000000000e+01
3.100000000000000000e+01 5.956538461538458478e+02 2.607223510742187500e+02 -1.555786132812500000e+00 9.999999776482582092e-03 0.000000000000000000e+00 1.666609130859375000e+03 1.666849970817565918e+00 1.500000000000000000e+01 3.000000000000000000e+00 2.604273986816406250e+02 2.875000000000000000e+01 6.625000000000000000e+01
2.800000000000000000e+01 5.917538461538459842e+02 2.770356750488281250e+02 -1.561767578125000000e+00 9.999999776482582092e-03 0.000000000000000000e+00 1.658766113281250000e+03 1.662347435951232910e+00 2.000000000000000000e+00 3.000000000000000000e+00 3.067322387695312500e+02 2.925000000000000000e+01 6.625000000000000000e+01
4.900000000000000000e+01 6.065692307692307850e+02 2.919543762207031250e+02 -1.567749023437500000e+00 9.999999776482582092e-03 0.000000000000000000e+00 1.650923095703125000e+03 1.665418982505798340e+00 2.000000000000000000e+00 4.000000000000000000e+00 2.306734008789062500e+02 2.975000000000000000e+01 6.625000000000000000e+01
4.100000000000000000e+01 5.726923076923073950e+02 2.672026367187500000e+02 -1.432647705078125000e+00 0.000000000000000000e+00 0.000000000000000000e+00 1.599400024414062500e+03 1.722585082054138184e+00 2.000000000000000000e+00 3.000000000000000000e+00 7.727204132080078125e+01 3.275000000000000000e+01 6.625000000000000000e+01
0.000000000000000000e+00 1.483553846153845598e+03 3.787015380859375000e+02 -1.084289550781250000e+00 2.241785675287246704e-01 0.000000000000000000e+00 1.187762329101562500e+03 8.675360679626464844e-01 2.000000000000000000e+00 1.000000000000000000e+00 1.075395385742187500e+03 1.525000000000000000e+01 6.675000000000000000e+01
4.000000000000000000e+00 1.214438461538461979e+03 3.649012451171875000e+02 -1.627105712890625000e+00 9.999999776482582092e-03 0.000000000000000000e+00 1.146169799804687500e+03 9.135194420814514160e-01 1.200000000000000000e+01 1.000000000000000000e+00 6.576677246093750000e+02 1.575000000000000000e+01 6.675000000000000000e+01
7.000000000000000000e+00 6.089076923076925141e+02 3.390434875488281250e+02 -3.120147705078125000e+00 1.864676475524902344e-01 0.000000000000000000e+00 1.084172973632812500e+03 1.156999707221984863e+00 1.200000000000000000e+01 1.000000000000000000e+00 6.765350341796875000e+02 1.775000000000000000e+01 6.675000000000000000e+01
1.800000000000000000e+01 6.062769230769230262e+02 3.062984313964843750e+02 -3.361053466796875000e+00 1.171012148261070251e-01 0.000000000000000000e+00 1.223090332031250000e+03 1.557644367218017578e+00 2.000000000000000000e+00 1.000000000000000000e+00 3.440039978027343750e+02 1.975000000000000000e+01 6.675000000000000000e+01
4.100000000000000000e+01 5.572384615384615927e+02 3.038711242675781250e+02 -3.326232910156250000e+00 1.055537611246109009e-01 0.000000000000000000e+00 1.274499755859375000e+03 1.582931518554687500e+00 2.000000000000000000e+00 3.000000000000000000e+00 3.410052185058593750e+02 2.025000000000000000e+01 6.675000000000000000e+01
2.900000000000000000e+01 5.788230769230768828e+02 3.122481689453125000e+02 -2.881317138671875000e+00 9.999999776482582092e-03 0.000000000000000000e+00 1.402098022460937500e+03 1.689177155494689941e+00 2.000000000000000000e+00 3.000000000000000000e+00 2.452512512207031250e+02 2.175000000000000000e+01 6.675000000000000000e+01
3.900000000000000000e+01 5.352153846153845507e+02 3.115950317382812500e+02 -2.695190429687500000e+00 0.000000000000000000e+00 0.000000000000000000e+00 1.441671875000000000e+03 1.725426793098449707e+00 2.000000000000000000e+00 3.000000000000000000e+00 1.907188110351562500e+02 2.225000000000000000e+01 6.675000000000000000e+01
4.300000000000000000e+01 5.511230769230770647e+02 3.059672851562500000e+02 -2.551269531250000000e+00 0.000000000000000000e+00 0.000000000000000000e+00 1.473685791015625000e+03 1.762470483779907227e+00 2.000000000000000000e+00 3.000000000000000000e+00 1.413748779296875000e+02 2.275000000000000000e+01 6.675000000000000000e+01
3.800000000000000000e+01 5.229846153846153811e+02 2.734574890136718750e+02 -2.347869873046875000e+00 0.000000000000000000e+00 0.000000000000000000e+00 1.522593750000000000e+03 1.802306532859802246e+00 2.000000000000000000e+00 3.000000000000000000e+00 1.291854858398437500e+02 2.375000000000000000e+01 6.675000000000000000e+01
3.200000000000000000e+01 5.147846153846155630e+02 2.594840393066406250e+02 -2.246154785156250000e+00 9.999999776482582092e-03 0.000000000000000000e+00 1.547047729492187500e+03 1.811027526855468750e+00 1.500000000000000000e+01 3.000000000000000000e+00 1.459376068115234375e+02 2.425000000000000000e+01 6.675000000000000000e+01
3.800000000000000000e+01 4.879307692307693287e+02 2.583700866699218750e+02 -2.216857910156250000e+00 9.999999776482582092e-03 0.000000000000000000e+00 1.557919189453125000e+03 1.814453959465026855e+00 1.500000000000000000e+01 3.000000000000000000e+00 1.794225311279296875e+02 2.475000000000000000e+01 6.675000000000000000e+01
4.700000000000000000e+01 4.683153846153848008e+02 2.546945495605468750e+02 -2.211669921875000000e+00 9.999999776482582092e-03 0.000000000000000000e+00 1.564263183593750000e+03 1.814115762710571289e+00 1.500000000000000000e+01 4.000000000000000000e+00 1.728894805908203125e+02 2.525000000000000000e+01 6.675000000000000000e+01
5.300000000000000000e+01 4.731230769230768374e+02 2.536931610107421875e+02 -2.201293945312500000e+00 9.999999776482582092e-03 0.000000000000000000e+00 1.576951293945312500e+03 1.796750664710998535e+00 1.500000000000000000e+01 4.000000000000000000e+00 1.428364257812500000e+02 2.625000000000000000e+01 6.675000000000000000e+01
2.900000000000000000e+01 4.578153846153845734e+02 2.636636352539062500e+02 -2.167297363281250000e+00 9.999999776482582092e-03 0.000000000000000000e+00 1.576986816406250000e+03 1.768592357635498047e+00 1.500000000000000000e+01 3.000000000000000000e+00 2.218569183349609375e+02 2.675000000000000000e+01 6.675000000000000000e+01
2.400000000000000000e+01 5.329307692307692150e+02 2.698919372558593750e+02 -2.133300781250000000e+00 9.999999776482582092e-03 0.000000000000000000e+00 1.577022460937500000e+03 1.729429244995117188e+00 2.000000000000000000e+00 3.000000000000000000e+00 2.033805541992187500e+02 2.725000000000000000e+01 6.675000000000000000e+01
2.100000000000000000e+01 5.232153846153847780e+02 2.714918518066406250e+02 -2.099304199218750000e+00 9.999999776482582092e-03 0.000000000000000000e+00 1.577058105468750000e+03 1.692680954933166504e+00 1.500000000000000000e+01 3.000000000000000000e+00 1.909636383056640625e+02 2.775000000000000000e+01 6.675000000000000000e+01
4.500000000000000000e+01 5.777230769230770875e+02 2.751142272949218750e+02 -2.033966064453125000e+00 1.040973514318466187e-01 0.000000000000000000e+00 1.569600463867187500e+03 1.635671138763427734e+00 1.500000000000000000e+01 4.000000000000000000e+00 2.784956665039062500e+02 2.875000000000000000e+01 6.675000000000000000e+01
3.200000000000000000e+01 6.089769230769226169e+02 2.817352600097656250e+02 -2.002075195312500000e+00 1.338557749986648560e-01 0.000000000000000000e+00 1.563613037109375000e+03 1.619449257850646973e+00 1.500000000000000000e+01 3.000000000000000000e+00 3.703100280761718750e+02 2.925000000000000000e+01 6.675000000000000000e+01
2.400000000000000000e+01 6.309538461538463707e+02 2.903259277343750000e+02 -1.970184326171875000e+00 1.015412360429763794e-01 0.000000000000000000e+00 1.557625610351562500e+03 1.621099114418029785e+00 2.000000000000000000e+00 3.000000000000000000e+00 3.333861083984375000e+02 2.975000000000000000e+01 6.675000000000000000e+01
5.100000000000000000e+01 5.971153846153845279e+02 2.951174011230468750e+02 -1.930206298828125000e+00 9.999999776482582092e-03 0.000000000000000000e+00 1.550795654296875000e+03 1.640493631362915039e+00 2.000000000000000000e+00 4.000000000000000000e+00 1.718598480224609375e+02 3.025000000000000000e+01 6.675000000000000000e+01
3.300000000000000000e+01 5.740692307692307850e+02 2.966247253417968750e+02 -1.882171630859375000e+00 9.999999776482582092e-03 0.000000000000000000e+00 1.543123168945312500e+03 1.651484489440917969e+00 2.000000000000000000e+00 3.000000000000000000e+00 1.634221801757812500e+02 3.075000000000000000e+01 6.675000000000000000e+01
3.000000000000000000e+00 1.330199999999999818e+03 4.419478149414062500e+02 -1.338165283203125000e+00 0.000000000000000000e+00 0.000000000000000000e+00 1.166997314453125000e+03 1.124650716781616211e+00 1.200000000000000000e+01 1.000000000000000000e+00 7.068782348632812500e+02 1.575000000000000000e+01 6.725000000000000000e+01
2.000000000000000000e+00 9.897846153846146535e+02 3.867620849609375000e+02 -2.764343261718750000e+00 2.605481743812561035e-01 0.000000000000000000e+00 1.010904113769531250e+03 7.117016315460205078e-01 1.200000000000000000e+01 1.000000000000000000e+00 9.282592773437500000e+02 1.675000000000000000e+01 6.725000000000000000e+01
8.000000000000000000e+00 9.663307692307698744e+02 3.640941772460937500e+02 -3.142242431640625000e+00 7.675994634628295898e-01 0.000000000000000000e+00 9.944938354492187500e+02 6.973703503608703613e-01 1.200000000000000000e+01 1.000000000000000000e+00 1.114663085937500000e+03 1.725000000000000000e+01 6.725000000000000000e+01
5.000000000000000000e+00 1.060499999999999545e+03 3.559150390625000000e+02 -3.408386230468750000e+00 7.323752641677856445e-01 0.000000000000000000e+00 9.986289672851562500e+02 8.398096561431884766e-01 1.200000000000000000e+01 1.000000000000000000e+00 1.156926391601562500e+03 1.775000000000000000e+01 6.725000000000000000e+01
0.000000000000000000e+00 6.688923076923076678e+02 3.280863037109375000e+02 -3.940704345703125000e+00 4.890756309032440186e-01 0.000000000000000000e+00 1.006899169921875000e+03 1.193952798843383789e+00 1.200000000000000000e+01 1.000000000000000000e+00 9.390028686523437500e+02 1.875000000000000000e+01 6.725000000000000000e+01
3.700000000000000000e+01 5.111846153846154266e+02 2.994285888671875000e+02 -3.967895507812500000e+00 1.038736030459403992e-01 0.000000000000000000e+00 1.120605224609375000e+03 1.514701724052429199e+00 1.200000000000000000e+01 3.000000000000000000e+00 4.591655578613281250e+02 1.975000000000000000e+01 6.725000000000000000e+01
3.000000000000000000e+01 5.465384615384616609e+02 3.206577148437500000e+02 -3.834930419921875000e+00 1.410468220710754395e-01 0.000000000000000000e+00 1.258334228515625000e+03 1.570422530174255371e+00 2.000000000000000000e+00 3.000000000000000000e+00 3.961983337402343750e+02 2.125000000000000000e+01 6.725000000000000000e+01
4.500000000000000000e+01 5.151384615384615699e+02 3.219604797363281250e+02 -3.709533691406250000e+00 1.505769342184066772e-01 0.000000000000000000e+00 1.288923339843750000e+03 1.627874135971069336e+00 2.000000000000000000e+00 4.000000000000000000e+00 4.306494140625000000e+02 2.175000000000000000e+01 6.725000000000000000e+01
5.000000000000000000e+01 4.834230769230768487e+02 3.242494506835937500e+02 -3.584136962890625000e+00 9.999999776482582092e-03 0.000000000000000000e+00 1.319512329101562500e+03 1.675431251525878906e+00 2.000000000000000000e+00 4.000000000000000000e+00 2.354518737792968750e+02 2.225000000000000000e+01 6.725000000000000000e+01
1.600000000000000000e+01 5.272615384615384073e+02 3.312649536132812500e+02 -3.357574462890625000e+00 9.999999776482582092e-03 0.000000000000000000e+00 1.370300170898437500e+03 1.721656203269958496e+00 2.000000000000000000e+00 1.000000000000000000e+00 1.743409423828125000e+02 2.325000000000000000e+01 6.725000000000000000e+01
4.600000000000000000e+01 5.347999999999997272e+02 3.152073059082031250e+02 -3.248321533203125000e+00 9.999999776482582092e-03 0.000000000000000000e+00 1.393962280273437500e+03 1.736037850379943848e+00 2.000000000000000000e+00 4.000000000000000000e+00 1.571310577392578125e+02 2.375000000000000000e+01 6.725000000000000000e+01
3.100000000000000000e+01 4.617000000000005002e+02 2.891382446289062500e+02 -3.139099121093750000e+00 9.999999776482582092e-03 0.000000000000000000e+00 1.417624511718750000e+03 1.761350870132446289e+00 1.500000000000000000e+01 3.000000000000000000e+00 2.248453063964843750e+02 2.425000000000000000e+01 6.725000000000000000e+01
3.300000000000000000e+01 4.585384615384616041e+02 2.785378417968750000e+02 -3.063781738281250000e+00 9.999999776482582092e-03 0.000000000000000000e+00 1.431614990234375000e+03 1.776142477989196777e+00 1.500000000000000000e+01 3.000000000000000000e+00 1.859388427734375000e+02 2.475000000000000000e+01 6.725000000000000000e+01
2.300000000000000000e+01 4.447384615384613653e+02 2.782439270019531250e+02 -2.999755859375000000e+00 9.999999776482582092e-03 0.000000000000000000e+00 1.442381591796875000e+03 1.773830771446228027e+00 1.500000000000000000e+01 3.000000000000000000e+00 2.105217437744140625e+02 2.525000000000000000e+01 6.725000000000000000e+01
2.600000000000000000e+01 4.523846153846156426e+02 2.819352416992187500e+02 -2.935760498046875000e+00 9.999999776482582092e-03 0.000000000000000000e+00 1.453148315429687500e+03 1.768811106681823730e+00 1.500000000000000000e+01 3.000000000000000000e+00 2.098432922363281250e+02 2.575000000000000000e+01 6.725000000000000000e+01
2.800000000000000000e+01 4.473846153846152447e+02 2.908483276367187500e+02 -2.871734619140625000e+00 9.999999776482582092e-03 0.000000000000000000e+00 1.463914916992187500e+03 1.755376100540161133e+00 2.000000000000000000e+00 3.000000000000000000e+00 2.835703430175781250e+02 2.625000000000000000e+01 6.725000000000000000e+01
3.800000000000000000e+01 4.470846153846151196e+02 2.993263854980468750e+02 -2.799102783203125000e+00 9.999999776482582092e-03 0.000000000000000000e+00 1.467606079101562500e+03 1.740396857261657715e+00 2.000000000000000000e+00 3.000000000000000000e+00 1.872357482910156250e+02 2.675000000000000000e+01 6.725000000000000000e+01
4.500000000000000000e+01 4.557384615384613653e+02 3.027434997558593750e+02 -2.726470947265625000e+00 9.999999776482582092e-03 0.000000000000000000e+00 1.471297241210937500e+03 1.727678179740905762e+00 1.500000000000000000e+01 4.000000000000000000e+00 1.831323242187500000e+02 2.725000000000000000e+01 6.725000000000000000e+01
3.800000000000000000e+01 4.492000000000001023e+02 3.024511718750000000e+02 -2.653808593750000000e+00 9.999999776482582092e-03 0.000000000000000000e+00 1.474988403320312500e+03 1.716522097587585449e+00 1.500000000000000000e+01 3.000000000000000000e+00 2.135523986816406250e+02 2.775000000000000000e+01 6.725000000000000000e+01
2.900000000000000000e+01 4.516538461538459615e+02 3.019167480468750000e+02 -2.581878662109375000e+00 9.999999776482582092e-03 0.000000000000000000e+00 1.476723754882812500e+03 1.706380844116210938e+00 1.500000000000000000e+01 3.000000000000000000e+00 1.830993652343750000e+02 2.825000000000000000e+01 6.725000000000000000e+01
1.100000000000000000e+01 4.485538461538463366e+02 3.014923095703125000e+02 -2.512145996093750000e+00 9.999999776482582092e-03 0.000000000000000000e+00 1.472591918945312500e+03 1.696082472801208496e+00 1.500000000000000000e+01 1.000000000000000000e+00 2.661304931640625000e+02 2.875000000000000000e+01 6.725000000000000000e+01
1.000000000000000000e+00 4.892153846153844938e+02 3.000966491699218750e+02 -2.442382812500000000e+00 9.999999776482582092e-03 0.000000000000000000e+00 1.468459960937500000e+03 1.673986315727233887e+00 1.500000000000000000e+01 1.000000000000000000e+00 2.524762725830078125e+02 2.925000000000000000e+01 6.725000000000000000e+01
8.000000000000000000e+00 5.042153846153844938e+02 2.995087890625000000e+02 -2.372619628906250000e+00 9.999999776482582092e-03 0.000000000000000000e+00 1.464328125000000000e+03 1.639931797981262207e+00 1.200000000000000000e+01 1.000000000000000000e+00 2.894501342773437500e+02 2.975000000000000000e+01 6.725000000000000000e+01
3.100000000000000000e+01 6.309307692307692150e+02 2.989799194335937500e+02 -2.296020507812500000e+00 1.010796055197715759e-01 0.000000000000000000e+00 1.459473510742187500e+03 1.596960902214050293e+00 2.000000000000000000e+00 3.000000000000000000e+00 2.813521728515625000e+02 3.025000000000000000e+01 6.725000000000000000e+01
1.300000000000000000e+01 6.825615384615383618e+02 2.995714721679687500e+02 -2.212585449218750000e+00 1.179851666092872620e-01 0.000000000000000000e+00 1.453896118164062500e+03 1.563280940055847168e+00 1.200000000000000000e+01 1.000000000000000000e+00 3.422238159179687500e+02 3.075000000000000000e+01 6.725000000000000000e+01
2.200000000000000000e+01 7.174307692307689877e+02 3.057454528808593750e+02 -2.045715332031250000e+00 1.489943712949752808e-01 0.000000000000000000e+00 1.442741210937500000e+03 1.571195363998413086e+00 2.000000000000000000e+00 3.000000000000000000e+00 2.481712188720703125e+02 3.175000000000000000e+01 6.725000000000000000e+01
3.100000000000000000e+01 7.273307692307697607e+02 3.147399902343750000e+02 -1.875518798828125000e+00 9.999999776482582092e-03 2.941176593303680420e-01 1.423644653320312500e+03 1.603212356567382812e+00 2.000000000000000000e+00 3.000000000000000000e+00 1.652178955078125000e+02 3.275000000000000000e+01 6.725000000000000000e+01
0.000000000000000000e+00 9.761230769230769511e+02 3.959073181152343750e+02 -3.299896240234375000e+00 1.777761131525039673e-01 0.000000000000000000e+00 9.597008056640625000e+02 7.308686971664428711e-01 1.200000000000000000e+01 1.000000000000000000e+00 9.330848388671875000e+02 1.775000000000000000e+01 6.775000000000000000e+01
1.000000000000000000e+00 7.580307692307690104e+02 3.184931945800781250e+02 -4.052825927734375000e+00 3.628533482551574707e-01 0.000000000000000000e+00 9.412775878906250000e+02 1.034095287322998047e+00 1.200000000000000000e+01 1.000000000000000000e+00 1.050805908203125000e+03 1.875000000000000000e+01 6.775000000000000000e+01
5.000000000000000000e+00 5.651000000000000227e+02 2.812186889648437500e+02 -4.117919921875000000e+00 1.874265074729919434e-01 0.000000000000000000e+00 9.963090820312500000e+02 1.129528760910034180e+00 1.200000000000000000e+01 1.000000000000000000e+00 7.709692382812500000e+02 1.925000000000000000e+01 6.775000000000000000e+01
1.000000000000000000e+01 4.876923076923076223e+02 2.575080566406250000e+02 -4.182983398437500000e+00 1.963155120611190796e-01 0.000000000000000000e+00 1.051340576171875000e+03 1.217429995536804199e+00 1.200000000000000000e+01 1.000000000000000000e+00 6.687089843750000000e+02 1.975000000000000000e+01 6.775000000000000000e+01
1.500000000000000000e+01 4.968923076923076678e+02 2.418819885253906250e+02 -4.248046875000000000e+00 1.354176849126815796e-01 0.000000000000000000e+00 1.106372070312500000e+03 1.461538910865783691e+00 1.200000000000000000e+01 1.000000000000000000e+00 4.526611022949218750e+02 2.025000000000000000e+01 6.775000000000000000e+01
1.400000000000000000e+01 5.028615384615382595e+02 3.243819274902343750e+02 -3.893951416015625000e+00 9.999999776482582092e-03 0.000000000000000000e+00 1.262485717773437500e+03 1.653444409370422363e+00 2.000000000000000000e+00 1.000000000000000000e+00 2.571058654785156250e+02 2.325000000000000000e+01 6.775000000000000000e+01
2.500000000000000000e+01 5.072153846153848917e+02 3.228828430175781250e+02 -3.782684326171875000e+00 1.077942997217178345e-01 0.000000000000000000e+00 1.286660156250000000e+03 1.673721551895141602e+00 2.000000000000000000e+00 3.000000000000000000e+00 2.576479492187500000e+02 2.375000000000000000e+01 6.775000000000000000e+01
3.600000000000000000e+01 4.296000000000000227e+02 3.148717651367187500e+02 -3.671447753906250000e+00 1.540427356958389282e-01 0.000000000000000000e+00 1.310834716796875000e+03 1.706209063529968262e+00 1.500000000000000000e+01 3.000000000000000000e+00 2.924859313964843750e+02 2.425000000000000000e+01 6.775000000000000000e+01
2.700000000000000000e+01 4.083153846153845166e+02 3.073859863281250000e+02 -3.565917968750000000e+00 9.999999776482582092e-03 0.000000000000000000e+00 1.327494384765625000e+03 1.737494468688964844e+00 1.500000000000000000e+01 3.000000000000000000e+00 2.377018737792968750e+02 2.475000000000000000e+01 6.775000000000000000e+01
2.500000000000000000e+01 4.134230769230771898e+02 3.037841186523437500e+02 -3.358673095703125000e+00 1.005919724702835083e-01 0.000000000000000000e+00 1.355803955078125000e+03 1.731089949607849121e+00 1.500000000000000000e+01 3.000000000000000000e+00 2.874603271484375000e+02 2.575000000000000000e+01 6.775000000000000000e+01
1.900000000000000000e+01 4.164153846153848804e+02 3.087448120117187500e+02 -3.255065917968750000e+00 9.999999776482582092e-03 0.000000000000000000e+00 1.369958740234375000e+03 1.723255634307861328e+00 2.000000000000000000e+00 1.000000000000000000e+00 2.902821960449218750e+02 2.625000000000000000e+01 6.775000000000000000e+01
3.300000000000000000e+01 4.154461538461537202e+02 3.132937316894531250e+02 -3.156707763671875000e+00 9.999999776482582092e-03 0.000000000000000000e+00 1.376113403320312500e+03 1.706345915794372559e+00 1.500000000000000000e+01 3.000000000000000000e+00 2.165563354492187500e+02 2.675000000000000000e+01 6.775000000000000000e+01
0.000000000000000000e+00 4.432923076923077019e+02 2.930795593261718750e+02 -2.765655517578125000e+00 9.999999776482582092e-03 0.000000000000000000e+00 1.389801513671875000e+03 1.670038580894470215e+00 1.500000000000000000e+01 1.000000000000000000e+00 2.332382659912109375e+02 2.875000000000000000e+01 6.775000000000000000e+01
3.800000000000000000e+01 4.922461538461540158e+02 2.880019226074218750e+02 -2.669219970703125000e+00 9.999999776482582092e-03 0.000000000000000000e+00 1.387211791992187500e+03 1.626922845840454102e+00 1.500000000000000000e+01 3.000000000000000000e+00 2.643179016113281250e+02 2.925000000000000000e+01 6.775000000000000000e+01
3.400000000000000000e+01 5.766769230769232308e+02 2.860105590820312500e+02 -2.572753906250000000e+00 1.370433270931243896e-01 0.000000000000000000e+00 1.384622070312500000e+03 1.582000494003295898e+00 1.200000000000000000e+01 3.000000000000000000e+00 3.171341857910156250e+02 2.975000000000000000e+01 6.775000000000000000e+01
2.900000000000000000e+01 6.318153846153846871e+02 2.876356506347656250e+02 -2.470764160156250000e+00 9.999999776482582092e-03 0.000000000000000000e+00 1.381114257812500000e+03 1.543842911720275879e+00 2.000000000000000000e+00 3.000000000000000000e+00 1.443831024169921875e+02 3.025000000000000000e+01 6.775000000000000000e+01
3.100000000000000000e+01 7.043153846153844597e+02 2.910894470214843750e+02 -2.363250732421875000e+00 1.050104498863220215e-01 0.000000000000000000e+00 1.376688354492187500e+03 1.524473667144775391e+00 2.000000000000000000e+00 3.000000000000000000e+00 2.547672729492187500e+02 3.075000000000000000e+01 6.775000000000000000e+01
2.800000000000000000e+01 6.931923076923078497e+02 2.935471496582031250e+02 -2.255737304687500000e+00 9.999999776482582092e-03 0.000000000000000000e+00 1.372262451171875000e+03 1.518938899040222168e+00 2.000000000000000000e+00 3.000000000000000000e+00 2.151287689208984375e+02 3.125000000000000000e+01 6.775000000000000000e+01
1.600000000000000000e+01 7.140538461538460524e+02 2.938078918457031250e+02 -2.148223876953125000e+00 9.999999776482582092e-03 0.000000000000000000e+00 1.367836547851562500e+03 1.522069454193115234e+00 2.000000000000000000e+00 1.000000000000000000e+00 3.092830505371093750e+02 3.175000000000000000e+01 6.775000000000000000e+01
9.000000000000000000e+00 5.045153846153847326e+02 2.722363586425781250e+02 -3.440887451171875000e+00 1.862764805555343628e-01 0.000000000000000000e+00 1.106983398437500000e+03 1.138473510742187500e+00 1.200000000000000000e+01 1.000000000000000000e+00 5.202965087890625000e+02 2.025000000000000000e+01 6.825000000000000000e+01
0.000000000000000000e+00 5.075384615384616609e+02 2.519850921630859375e+02 -3.535675048828125000e+00 1.987316161394119263e-01 0.000000000000000000e+00 1.134220458984375000e+03 1.150844693183898926e+00 1.200000000000000000e+01 1.000000000000000000e+00 6.095155639648437500e+02 2.075000000000000000e+01 6.825000000000000000e+01
1.200000000000000000e+01 5.530923076923079407e+02 2.572897033691406250e+02 -3.540008544921875000e+00 1.956810504198074341e-01 0.000000000000000000e+00 1.143744262695312500e+03 1.169466018676757812e+00 1.200000000000000000e+01 1.000000000000000000e+00 5.085600280761718750e+02 2.125000000000000000e+01 6.825000000000000000e+01
1.100000000000000000e+01 5.491076923076923322e+02 2.683375549316406250e+02 -3.544311523437500000e+00 2.405644804239273071e-01 0.000000000000000000e+00 1.153268188476562500e+03 1.201596856117248535e+00 1.200000000000000000e+01 1.000000000000000000e+00 4.867329711914062500e+02 2.175000000000000000e+01 6.825000000000000000e+01
1.300000000000000000e+01 5.284846153846152674e+02 2.791300964355468750e+02 -3.548614501953125000e+00 1.659706085920333862e-01 0.000000000000000000e+00 1.162792114257812500e+03 1.324832558631896973e+00 2.000000000000000000e+00 1.000000000000000000e+00 4.367154846191406250e+02 2.225000000000000000e+01 6.825000000000000000e+01
1.700000000000000000e+01 4.279615384615385096e+02 2.902556152343750000e+02 -3.403808593750000000e+00 1.198207587003707886e-01 0.000000000000000000e+00 1.209987548828125000e+03 1.514284133911132812e+00 2.000000000000000000e+00 1.000000000000000000e+00 2.927099304199218750e+02 2.325000000000000000e+01 6.825000000000000000e+01
8.000000000000000000e+00 4.997538461538462116e+02 2.903048706054687500e+02 -3.305816650390625000e+00 2.798621058464050293e-01 0.000000000000000000e+00 1.238276489257812500e+03 1.356408357620239258e+00 2.000000000000000000e+00 1.000000000000000000e+00 4.933670349121093750e+02 2.375000000000000000e+01 6.825000000000000000e+01
3.100000000000000000e+01 5.155923076923074859e+02 2.883399047851562500e+02 -3.207824707031250000e+00 1.706019788980484009e-01 0.000000000000000000e+00 1.266565429687500000e+03 1.389389753341674805e+00 1.500000000000000000e+01 3.000000000000000000e+00 3.419288024902343750e+02 2.425000000000000000e+01 6.825000000000000000e+01
7.000000000000000000e+00 5.686692307692308077e+02 2.845300292968750000e+02 -3.115692138671875000e+00 2.256698906421661377e-01 0.000000000000000000e+00 1.284651855468750000e+03 1.556879401206970215e+00 2.000000000000000000e+00 1.000000000000000000e+00 3.354657287597656250e+02 2.475000000000000000e+01 6.825000000000000000e+01
1.300000000000000000e+01 5.532461538461536747e+02 2.815559997558593750e+02 -3.025543212890625000e+00 1.560324579477310181e-01 0.000000000000000000e+00 1.299337402343750000e+03 1.551673531532287598e+00 2.000000000000000000e+00 1.000000000000000000e+00 3.333613586425781250e+02 2.525000000000000000e+01 6.825000000000000000e+01
9.000000000000000000e+00 5.542769230769232536e+02 2.806250915527343750e+02 -2.935363769531250000e+00 1.590744554996490479e-01 0.000000000000000000e+00 1.314022827148437500e+03 1.585539698600769043e+00 1.500000000000000000e+01 1.000000000000000000e+00 3.123654174804687500e+02 2.575000000000000000e+01 6.825000000000000000e+01
3.600000000000000000e+01 4.799076923076921162e+02 2.801024169921875000e+02 -2.845184326171875000e+00 1.205952838063240051e-01 0.000000000000000000e+00 1.328708374023437500e+03 1.596864461898803711e+00 1.500000000000000000e+01 3.000000000000000000e+00 2.759748840332031250e+02 2.625000000000000000e+01 6.825000000000000000e+01
1.100000000000000000e+01 4.758384615384615586e+02 2.784007568359375000e+02 -2.756866455078125000e+00 1.129772514104843140e-01 0.000000000000000000e+00 1.334033691406250000e+03 1.607843637466430664e+00 1.500000000000000000e+01 1.000000000000000000e+00 2.759716796875000000e+02 2.675000000000000000e+01 6.825000000000000000e+01
0.000000000000000000e+00 5.262923076923075314e+02 2.607056579589843750e+02 -2.490936279296875000e+00 9.999999776482582092e-03 0.000000000000000000e+00 1.348199707031250000e+03 1.589215874671936035e+00 2.000000000000000000e+00 1.000000000000000000e+00 3.493396301269531250e+02 2.825000000000000000e+01 6.825000000000000000e+01
3.600000000000000000e+01 6.360307692307693515e+02 2.541000518798828125e+02 -2.306396484375000000e+00 9.999999776482582092e-03 0.000000000000000000e+00 1.344373168945312500e+03 1.526571631431579590e+00 2.000000000000000000e+00 3.000000000000000000e+00 1.889262542724609375e+02 2.925000000000000000e+01 6.825000000000000000e+01
2.000000000000000000e+00 6.421000000000001364e+02 2.592060546875000000e+02 -2.214141845703125000e+00 1.132189631462097168e-01 0.000000000000000000e+00 1.342459838867187500e+03 1.515146970748901367e+00 1.200000000000000000e+01 1.000000000000000000e+00 2.579024047851562500e+02 2.975000000000000000e+01 6.825000000000000000e+01
2.800000000000000000e+01 6.566000000000001364e+02 2.745322570800781250e+02 -2.017395019531250000e+00 9.999999776482582092e-03 0.000000000000000000e+00 1.332682006835937500e+03 1.513608455657958984e+00 2.000000000000000000e+00 3.000000000000000000e+00 2.040670623779296875e+02 3.075000000000000000e+01 6.825000000000000000e+01
3.400000000000000000e+01 6.930076923076924231e+02 2.850293884277343750e+02 -1.816589355468750000e+00 9.999999776482582092e-03 0.000000000000000000e+00 1.320920532226562500e+03 1.521329998970031738e+00 2.000000000000000000e+00 3.000000000000000000e+00 2.372928924560546875e+02 3.175000000000000000e+01 6.825000000000000000e+01
4.800000000000000000e+01 7.088692307692307395e+02 2.810786743164062500e+02 -1.629730224609375000e+00 9.999999776482582092e-03 0.000000000000000000e+00 1.306177246093750000e+03 1.536153316497802734e+00 2.000000000000000000e+00 4.000000000000000000e+00 2.303936309814453125e+02 3.225000000000000000e+01 6.825000000000000000e+01
4.200000000000000000e+01 7.901846153846157677e+02 4.104545593261718750e+02 -2.448883056640625000e+00 1.128854975104331970e-01 0.000000000000000000e+00 1.096343383789062500e+03 9.126898050308227539e-01 1.200000000000000000e+01 3.000000000000000000e+00 5.000558471679687500e+02 1.975000000000000000e+01 6.875000000000000000e+01
0.000000000000000000e+00 7.607461538461540158e+02 3.526145019531250000e+02 -2.633728027343750000e+00 4.986412227153778076e-01 0.000000000000000000e+00 1.107594726562500000e+03 9.967894554138183594e-01 1.200000000000000000e+01 1.000000000000000000e+00 9.146917724609375000e+02 2.025000000000000000e+01 6.875000000000000000e+01
1.000000000000000000e+00 5.989769230769231854e+02 3.026497192382812500e+02 -2.790222167968750000e+00 2.835489809513092041e-01 0.000000000000000000e+00 1.115556518554687500e+03 1.167900800704956055e+00 1.200000000000000000e+01 1.000000000000000000e+00 7.141455688476562500e+02 2.075000000000000000e+01 6.875000000000000000e+01
0.000000000000000000e+00 6.341538461538463025e+02 2.774601440429687500e+02 -2.861816406250000000e+00 1.695830523967742920e-01 0.000000000000000000e+00 1.113650146484375000e+03 1.412063121795654297e+00 1.200000000000000000e+01 1.000000000000000000e+00 5.067897033691406250e+02 2.125000000000000000e+01 6.875000000000000000e+01
7.000000000000000000e+00 6.486000000000001364e+02 2.694718627929687500e+02 -2.933380126953125000e+00 4.459125101566314697e-01 0.000000000000000000e+00 1.111743774414062500e+03 1.129840016365051270e+00 1.200000000000000000e+01 1.000000000000000000e+00 6.978262329101562500e+02 2.175000000000000000e+01 6.875000000000000000e+01
7.000000000000000000e+00 5.837615384615386347e+02 2.646351928710937500e+02 -3.004943847656250000e+00 1.712970286607742310e-01 0.000000000000000000e+00 1.109837280273437500e+03 1.154837727546691895e+00 1.200000000000000000e+01 1.000000000000000000e+00 4.450550231933593750e+02 2.225000000000000000e+01 6.875000000000000000e+01
0.000000000000000000e+00 5.827230769230768601e+02 2.577692260742187500e+02 -2.998382568359375000e+00 1.982843279838562012e-01 0.000000000000000000e+00 1.125085815429687500e+03 1.188534617424011230e+00 2.000000000000000000e+00 1.000000000000000000e+00 4.871811523437500000e+02 2.275000000000000000e+01 6.875000000000000000e+01
4.000000000000000000e+00 4.583923076923076678e+02 2.431637878417968750e+02 -2.913665771484375000e+00 1.440140604972839355e-01 0.000000000000000000e+00 1.157489257812500000e+03 1.211467385292053223e+00 2.000000000000000000e+00 1.000000000000000000e+00 3.817956542968750000e+02 2.325000000000000000e+01 6.875000000000000000e+01
0.000000000000000000e+00 4.886846153846153697e+02 2.341520690917968750e+02 -2.828948974609375000e+00 1.800992488861083984e-01 0.000000000000000000e+00 1.189892700195312500e+03 1.393898248672485352e+00 2.000000000000000000e+00 1.000000000000000000e+00 4.397066955566406250e+02 2.375000000000000000e+01 6.875000000000000000e+01
4.000000000000000000e+00 5.025153846153843915e+02 2.368747711181640625e+02 -2.744201660156250000e+00 2.162412554025650024e-01 0.000000000000000000e+00 1.222296142578125000e+03 1.531534671783447266e+00 2.000000000000000000e+00 1.000000000000000000e+00 4.980601501464843750e+02 2.425000000000000000e+01 6.875000000000000000e+01
9.000000000000000000e+00 5.499615384615383391e+02 2.378464050292968750e+02 -2.665496826171875000e+00 1.860677599906921387e-01 0.000000000000000000e+00 1.241809326171875000e+03 1.235228657722473145e+00 2.000000000000000000e+00 1.000000000000000000e+00 4.040795288085937500e+02 2.475000000000000000e+01 6.875000000000000000e+01
1.400000000000000000e+01 5.581923076923073950e+02 2.355123596191406250e+02 -2.588745117187500000e+00 1.395658850669860840e-01 0.000000000000000000e+00 1.257025512695312500e+03 1.304904937744140625e+00 2.000000000000000000e+00 1.000000000000000000e+00 3.217092590332031250e+02 2.525000000000000000e+01 6.875000000000000000e+01
0.000000000000000000e+00 5.480307692307693515e+02 2.319901275634765625e+02 -2.512023925781250000e+00 1.794216483831405640e-01 0.000000000000000000e+00 1.272241821289062500e+03 1.306428670883178711e+00 2.000000000000000000e+00 1.000000000000000000e+00 3.846729431152343750e+02 2.575000000000000000e+01 6.875000000000000000e+01
1.400000000000000000e+01 4.831846153846154266e+02 2.255391693115234375e+02 -2.357025146484375000e+00 1.434367150068283081e-01 0.000000000000000000e+00 1.291953979492187500e+03 1.578492403030395508e+00 2.000000000000000000e+00 1.000000000000000000e+00 2.882761840820312500e+02 2.675000000000000000e+01 6.875000000000000000e+01
4.500000000000000000e+01 4.759153846153845393e+02 2.188441925048828125e+02 -2.119750976562500000e+00 9.999999776482582092e-03 0.000000000000000000e+00 1.304008178710937500e+03 1.613435029983520508e+00 2.000000000000000000e+00 4.000000000000000000e+00 2.103861083984375000e+02 2.825000000000000000e+01 6.875000000000000000e+01
1.100000000000000000e+01 4.878461538461539817e+02 2.201694488525390625e+02 -2.031677246093750000e+00 9.999999776482582092e-03 0.000000000000000000e+00 1.302771362304687500e+03 1.599783539772033691e+00 2.000000000000000000e+00 1.000000000000000000e+00 2.448118896484375000e+02 2.875000000000000000e+01 6.875000000000000000e+01
1.600000000000000000e+01 4.939769230769233559e+02 2.301555023193359375e+02 -1.943572998046875000e+00 9.999999776482582092e-03 0.000000000000000000e+00 1.301534423828125000e+03 1.578719854354858398e+00 2.000000000000000000e+00 1.000000000000000000e+00 1.901063079833984375e+02 2.925000000000000000e+01 6.875000000000000000e+01
4.900000000000000000e+01 5.075615384615385324e+02 2.441326904296875000e+02 -1.855499267578125000e+00 9.999999776482582092e-03 0.000000000000000000e+00 1.300297607421875000e+03 1.556143045425415039e+00 2.000000000000000000e+00 4.000000000000000000e+00 1.936757049560546875e+02 2.975000000000000000e+01 6.875000000000000000e+01
3.300000000000000000e+01 5.740923076923075996e+02 2.559400329589843750e+02 -1.764831542968750000e+00 9.999999776482582092e-03 0.000000000000000000e+00 1.296011352539062500e+03 1.540649414062500000e+00 1.200000000000000000e+01 3.000000000000000000e+00 1.628024749755859375e+02 3.025000000000000000e+01 6.875000000000000000e+01
2.000000000000000000e+01 6.057076923076922412e+02 2.677532348632812500e+02 -1.671539306640625000e+00 9.999999776482582092e-03 0.000000000000000000e+00 1.288675781250000000e+03 1.525527477264404297e+00 1.500000000000000000e+01 3.000000000000000000e+00 9.559361267089843750e+01 3.075000000000000000e+01 6.875000000000000000e+01
1.700000000000000000e+01 6.638923076923076678e+02 2.913520507812500000e+02 -1.484985351562500000e+00 9.999999776482582092e-03 0.000000000000000000e+00 1.274004394531250000e+03 1.531852841377258301e+00 2.000000000000000000e+00 1.000000000000000000e+00 1.423210296630859375e+02 3.175000000000000000e+01 6.875000000000000000e+01
2.400000000000000000e+01 6.129230769230767919e+02 2.901749877929687500e+02 -1.229949951171875000e+00 0.000000000000000000e+00 0.000000000000000000e+00 1.255241455078125000e+03 1.548719644546508789e+00 2.000000000000000000e+00 3.000000000000000000e+00 8.808759307861328125e+01 3.225000000000000000e+01 6.875000000000000000e+01
2.600000000000000000e+01 6.467230769230766327e+02 2.805711669921875000e+02 -9.209899902343750000e-01 0.000000000000000000e+00 0.000000000000000000e+00 1.232669433593750000e+03 1.563597679138183594e+00 2.000000000000000000e+00 3.000000000000000000e+00 6.775189971923828125e+01 3.275000000000000000e+01 6.875000000000000000e+01
0.000000000000000000e+00 9.514307692307692150e+02 4.625311279296875000e+02 -1.581848144531250000e+00 9.999999776482582092e-03 0.000000000000000000e+00 1.118844848632812500e+03 1.036865353584289551e+00 1.200000000000000000e+01 1.000000000000000000e+00 6.881139526367187500e+02 1.975000000000000000e+01 6.925000000000000000e+01
0.000000000000000000e+00 8.105846153846152902e+02 3.662620239257812500e+02 -2.044799804687500000e+00 5.144886970520019531e-01 0.000000000000000000e+00 1.096892700195312500e+03 7.572145462036132812e-01 1.200000000000000000e+01 1.000000000000000000e+00 9.686419677734375000e+02 2.075000000000000000e+01 6.925000000000000000e+01
0.000000000000000000e+00 7.994769230769229580e+02 3.271921691894531250e+02 -2.183624267578125000e+00 3.635165095329284668e-01 0.000000000000000000e+00 1.083556030273437500e+03 9.566989541053771973e-01 1.200000000000000000e+01 1.000000000000000000e+00 8.605152587890625000e+02 2.125000000000000000e+01 6.925000000000000000e+01
2.300000000000000000e+01 7.602000000000002728e+02 2.991052246093750000e+02 -2.322448730468750000e+00 2.876716852188110352e-01 0.000000000000000000e+00 1.070219238281250000e+03 1.964829325675964355e+00 1.200000000000000000e+01 3.000000000000000000e+00 7.281110229492187500e+02 2.175000000000000000e+01 6.925000000000000000e+01
0.000000000000000000e+00 6.537615384615382936e+02 2.663118591308593750e+02 -2.461303710937500000e+00 1.865560263395309448e-01 0.000000000000000000e+00 1.056882568359375000e+03 2.024302959442138672e+00 2.000000000000000000e+00 1.000000000000000000e+00 5.879535522460937500e+02 2.225000000000000000e+01 6.925000000000000000e+01
1.000000000000000000e+00 6.852538461538463253e+02 2.421555023193359375e+02 -2.494964599609375000e+00 1.600560098886489868e-01 0.000000000000000000e+00 1.068473144531250000e+03 1.754012942314147949e+00 2.000000000000000000e+00 1.000000000000000000e+00 4.438699645996093750e+02 2.275000000000000000e+01 6.925000000000000000e+01
4.000000000000000000e+00 6.426461538461536520e+02 2.296285858154296875e+02 -2.423522949218750000e+00 2.523181438446044922e-01 0.000000000000000000e+00 1.104991088867187500e+03 1.277146816253662109e+00 2.000000000000000000e+00 1.000000000000000000e+00 4.671932983398437500e+02 2.325000000000000000e+01 6.925000000000000000e+01
0.000000000000000000e+00 5.178769230769231626e+02 2.237410736083984375e+02 -2.352050781250000000e+00 1.561956852674484253e-01 0.000000000000000000e+00 1.141509033203125000e+03 1.890524864196777344e+00 2.000000000000000000e+00 1.000000000000000000e+00 3.620839233398437500e+02 2.375000000000000000e+01 6.925000000000000000e+01
4.000000000000000000e+00 5.066538461538462457e+02 2.240385742187500000e+02 -2.280578613281250000e+00 1.732468008995056152e-01 0.000000000000000000e+00 1.178026977539062500e+03 1.395196080207824707e+00 2.000000000000000000e+00 1.000000000000000000e+00 4.137855834960937500e+02 2.425000000000000000e+01 6.925000000000000000e+01
0.000000000000000000e+00 5.239384615384614108e+02 2.195205383300781250e+02 -2.215270996093750000e+00 1.138002425432205200e-01 0.000000000000000000e+00 1.198966674804687500e+03 1.221337914466857910e+00 2.000000000000000000e+00 1.000000000000000000e+00 2.753480834960937500e+02 2.475000000000000000e+01 6.925000000000000000e+01
0.000000000000000000e+00 5.609153846153843688e+02 2.178022003173828125e+02 -2.151977539062500000e+00 1.466075628995895386e-01 0.000000000000000000e+00 1.214713745117187500e+03 1.235851526260375977e+00 2.000000000000000000e+00 1.000000000000000000e+00 3.567564086914062500e+02 2.525000000000000000e+01 6.925000000000000000e+01
4.000000000000000000e+00 5.773615384615384301e+02 2.166841735839843750e+02 -2.088714599609375000e+00 1.076794639229774475e-01 0.000000000000000000e+00 1.230460815429687500e+03 1.317183136940002441e+00 2.000000000000000000e+00 1.000000000000000000e+00 2.682872924804687500e+02 2.575000000000000000e+01 6.925000000000000000e+01
0.000000000000000000e+00 5.246461538461536520e+02 2.162264251708984375e+02 -1.957183837890625000e+00 1.089586913585662842e-01 0.000000000000000000e+00 1.249874267578125000e+03 1.304405212402343750e+00 2.000000000000000000e+00 1.000000000000000000e+00 2.657767028808593750e+02 2.675000000000000000e+01 6.925000000000000000e+01
6.000000000000000000e+00 4.482538461538461547e+02 2.155887908935546875e+02 -1.888946533203125000e+00 9.999999776482582092e-03 0.000000000000000000e+00 1.253540649414062500e+03 1.535923957824707031e+00 2.000000000000000000e+00 1.000000000000000000e+00 1.962614440917968750e+02 2.725000000000000000e+01 6.925000000000000000e+01
2.300000000000000000e+01 4.931615384615383277e+02 2.169043121337890625e+02 -1.664672851562500000e+00 9.999999776482582092e-03 0.000000000000000000e+00 1.259256225585937500e+03 1.578360199928283691e+00 2.000000000000000000e+00 3.000000000000000000e+00 1.751446075439453125e+02 2.875000000000000000e+01 6.925000000000000000e+01
2.000000000000000000e+00 5.036615384615383277e+02 2.331709442138671875e+02 -1.496887207031250000e+00 9.999999776482582092e-03 2.941176593303680420e-01 1.258135375976562500e+03 1.541037678718566895e+00 2.000000000000000000e+00 1.000000000000000000e+00 3.081970825195312500e+02 2.975000000000000000e+01 6.925000000000000000e+01
8.000000000000000000e+00 5.762153846153846644e+02 2.420140991210937500e+02 -1.411834716796875000e+00 9.999999776482582092e-03 5.882352963089942932e-02 1.253459960937500000e+03 1.525356769561767578e+00 2.000000000000000000e+00 1.000000000000000000e+00 2.319300384521484375e+02 3.025000000000000000e+01 6.925000000000000000e+01
1.000000000000000000e+01 5.957923076923073040e+02 2.551047363281250000e+02 -1.325683593750000000e+00 0.000000000000000000e+00 0.000000000000000000e+00 1.244669433593750000e+03 1.566688418388366699e+00 2.000000000000000000e+00 1.000000000000000000e+00 2.072598419189453125e+02 3.075000000000000000e+01 6.925000000000000000e+01
1.800000000000000000e+01 6.375153846153848463e+02 2.656391296386718750e+02 -1.239532470703125000e+00 9.999999776482582092e-03 0.000000000000000000e+00 1.235878906250000000e+03 1.513599991798400879e+00 2.000000000000000000e+00 1.000000000000000000e+00 2.020003967285156250e+02 3.125000000000000000e+01 6.925000000000000000e+01
7.000000000000000000e+00 6.030769230769227534e+02 2.716439819335937500e+02 -1.153350830078125000e+00 9.999999776482582092e-03 0.000000000000000000e+00 1.227088378906250000e+03 1.521781325340270996e+00 2.000000000000000000e+00 1.000000000000000000e+00 2.135168914794921875e+02 3.175000000000000000e+01 6.925000000000000000e+01
6.000000000000000000e+00 6.154153846153848235e+02 2.726189270019531250e+02 -8.301696777343750000e-01 9.999999776482582092e-03 0.000000000000000000e+00 1.204305786132812500e+03 1.535406351089477539e+00 2.000000000000000000e+00 1.000000000000000000e+00 1.978566131591796875e+02 3.225000000000000000e+01 6.925000000000000000e+01
0.000000000000000000e+00 9.253923076923082363e+02 3.427892456054687500e+02 -1.356536865234375000e+00 9.999999776482582092e-03 0.000000000000000000e+00 1.083762695312500000e+03 3.062171339988708496e-01 1.200000000000000000e+01 1.000000000000000000e+00 5.293458251953125000e+02 2.175000000000000000e+01 6.975000000000000000e+01
0.000000000000000000e+00 9.113153846153853692e+02 2.539005432128906250e+02 -1.570373535156250000e+00 2.127899527549743652e-01 0.000000000000000000e+00 1.082027587890625000e+03 9.764288067817687988e-01 1.200000000000000000e+01 1.000000000000000000e+00 5.262348632812500000e+02 2.275000000000000000e+01 6.975000000000000000e+01
7.000000000000000000e+00 8.327846153846154493e+02 2.288885803222656250e+02 -1.516632080078125000e+00 2.626632452011108398e-01 0.000000000000000000e+00 1.101682250976562500e+03 1.085533976554870605e+00 2.000000000000000000e+00 1.000000000000000000e+00 3.738723754882812500e+02 2.325000000000000000e+01 6.975000000000000000e+01
1.000000000000000000e+00 6.742307692307690559e+02 2.163468780517578125e+02 -1.409118652343750000e+00 1.647151857614517212e-01 0.000000000000000000e+00 1.138922119140625000e+03 1.849542140960693359e+00 2.000000000000000000e+00 1.000000000000000000e+00 4.121830139160156250e+02 2.425000000000000000e+01 6.975000000000000000e+01
8.000000000000000000e+00 7.206923076923079634e+02 2.104526519775390625e+02 -1.359497070312500000e+00 2.415105402469635010e-01 0.000000000000000000e+00 1.162045288085937500e+03 1.754913330078125000e+00 1.200000000000000000e+01 1.000000000000000000e+00 4.753315124511718750e+02 2.475000000000000000e+01 6.975000000000000000e+01
5.000000000000000000e+00 7.088461538461536975e+02 2.116766357421875000e+02 -1.263092041015625000e+00 1.373882293701171875e-01 0.000000000000000000e+00 1.186314208984375000e+03 1.175757646560668945e+00 2.000000000000000000e+00 1.000000000000000000e+00 3.727644958496093750e+02 2.575000000000000000e+01 6.975000000000000000e+01
2.200000000000000000e+01 7.259000000000003183e+02 2.180677642822265625e+02 -1.214874267578125000e+00 1.290450990200042725e-01 0.000000000000000000e+00 1.195809204101562500e+03 1.178003311157226562e+00 2.000000000000000000e+00 3.000000000000000000e+00 2.707659301757812500e+02 2.625000000000000000e+01 6.975000000000000000e+01
1.100000000000000000e+01 5.963923076923078952e+02 2.253128356933593750e+02 -1.161529541015625000e+00 1.107130199670791626e-01 0.000000000000000000e+00 1.218718505859375000e+03 1.236668944358825684e+00 2.000000000000000000e+00 1.000000000000000000e+00 3.229524230957031250e+02 2.675000000000000000e+01 6.975000000000000000e+01
0.000000000000000000e+00 5.596000000000000227e+02 2.317790985107421875e+02 -1.108184814453125000e+00 1.262213140726089478e-01 0.000000000000000000e+00 1.221600097656250000e+03 1.759689450263977051e+00 2.000000000000000000e+00 1.000000000000000000e+00 3.207241821289062500e+02 2.725000000000000000e+01 6.975000000000000000e+01
0.000000000000000000e+00 5.776923076923079634e+02 2.393158874511718750e+02 -1.054870605468750000e+00 1.551093012094497681e-01 0.000000000000000000e+00 1.225037963867187500e+03 2.217261314392089844e+00 2.000000000000000000e+00 1.000000000000000000e+00 3.617507324218750000e+02 2.775000000000000000e+01 6.975000000000000000e+01
2.000000000000000000e+00 5.840307692307692378e+02 2.457495574951171875e+02 -9.976501464843750000e-01 9.999999776482582092e-03 0.000000000000000000e+00 1.230069702148437500e+03 2.084575891494750977e+00 2.000000000000000000e+00 1.000000000000000000e+00 2.525546112060546875e+02 2.825000000000000000e+01 6.975000000000000000e+01
3.000000000000000000e+00 5.844692307692309896e+02 2.492864074707031250e+02 -9.287719726562500000e-01 9.999999776482582092e-03 0.000000000000000000e+00 1.229220336914062500e+03 1.956226587295532227e+00 2.000000000000000000e+00 1.000000000000000000e+00 2.000628356933593750e+02 2.875000000000000000e+01 6.975000000000000000e+01
