# Supplementary material for: Environmental Conditions for Alternative Tree Cover States in HighLatitudes
Source: Copernicus journal article supplement (doi:10.5194/bg-2016-401), 2016-10-11
Supplement: Supplementary file 4 [file bg-2016-401-supplement.zip › Analysis/files_to_load_and_import/boreal_ea_west_database.txt]

6.000000000000000000e+00 8.939076923076925141e+02 3.799632873535156250e+02 9.344726562500000000e+00 0.000000000000000000e+00 0.000000000000000000e+00 4.089642578125000000e+03 4.084489822387695312e+00 1.000000000000000000e+00 1.473168487548828125e+02 3.750000000000000000e+00 5.025000000000000000e+01
6.900000000000000000e+01 1.047484615384615381e+03 5.419167480468750000e+02 8.124877929687500000e+00 0.000000000000000000e+00 0.000000000000000000e+00 3.758247802734375000e+03 3.866378307342529297e+00 4.000000000000000000e+00 4.837304687500000000e+02 6.250000000000000000e+00 5.025000000000000000e+01
1.000000000000000000e+01 9.266076923076919911e+02 4.385803527832031250e+02 7.890533447265625000e+00 0.000000000000000000e+00 0.000000000000000000e+00 3.693072753906250000e+03 3.881037950515747070e+00 1.000000000000000000e+00 5.417729492187500000e+02 6.750000000000000000e+00 5.025000000000000000e+01
3.300000000000000000e+01 7.496769230769225487e+02 4.128960266113281250e+02 6.730560302734375000e+00 0.000000000000000000e+00 0.000000000000000000e+00 3.362058349609375000e+03 3.120617866516113281e+00 3.000000000000000000e+00 3.809897155761718750e+02 9.750000000000000000e+00 5.025000000000000000e+01
7.000000000000000000e+01 6.376769230769227761e+02 4.068925476074218750e+02 6.314788818359375000e+00 0.000000000000000000e+00 0.000000000000000000e+00 3.248278808593750000e+03 3.694885492324829102e+00 4.000000000000000000e+00 4.127864074707031250e+02 1.125000000000000000e+01 5.025000000000000000e+01
4.000000000000000000e+00 7.019538461538458023e+02 3.936773071289062500e+02 6.258270263671875000e+00 0.000000000000000000e+00 0.000000000000000000e+00 3.239178710937500000e+03 3.619990110397338867e+00 1.000000000000000000e+00 6.020910644531250000e+02 1.175000000000000000e+01 5.025000000000000000e+01
3.100000000000000000e+01 6.967538461538465526e+02 3.620275268554687500e+02 6.201751708984375000e+00 0.000000000000000000e+00 0.000000000000000000e+00 3.230078613281250000e+03 3.606309652328491211e+00 3.000000000000000000e+00 5.811096191406250000e+02 1.225000000000000000e+01 5.025000000000000000e+01
6.000000000000000000e+00 6.174384615384616382e+02 3.399205932617187500e+02 6.087493896484375000e+00 0.000000000000000000e+00 0.000000000000000000e+00 3.216045654296875000e+03 3.708185434341430664e+00 1.000000000000000000e+00 4.377872314453125000e+02 1.325000000000000000e+01 5.025000000000000000e+01
6.000000000000000000e+00 6.397461538461539021e+02 3.241922302246093750e+02 5.848907470703125000e+00 0.000000000000000000e+00 2.941176593303680420e-01 3.248097412109375000e+03 3.873911619186401367e+00 1.000000000000000000e+00 2.197875213623046875e+02 1.525000000000000000e+01 5.025000000000000000e+01
1.600000000000000000e+01 8.825923076923077133e+02 3.594293823242187500e+02 5.704772949218750000e+00 0.000000000000000000e+00 2.941176593303680420e-01 3.281436035156250000e+03 3.528355598449707031e+00 1.000000000000000000e+00 6.434946899414062500e+02 1.675000000000000000e+01 5.025000000000000000e+01
4.100000000000000000e+01 8.755307692307687830e+02 3.838501281738281250e+02 5.697357177734375000e+00 0.000000000000000000e+00 5.882353186607360840e-01 3.292209472656250000e+03 3.518067359924316406e+00 3.000000000000000000e+00 6.589221191406250000e+02 1.725000000000000000e+01 5.025000000000000000e+01
1.700000000000000000e+01 6.492846153846154493e+02 3.354954528808593750e+02 5.274169921875000000e+00 0.000000000000000000e+00 0.000000000000000000e+00 3.202254638671875000e+03 3.890549659729003906e+00 1.000000000000000000e+00 2.079707641601562500e+02 2.175000000000000000e+01 5.025000000000000000e+01
5.700000000000000000e+01 6.837615384615384073e+02 2.747684936523437500e+02 5.128265380859375000e+00 0.000000000000000000e+00 0.000000000000000000e+00 3.153944335937500000e+03 3.833923578262329102e+00 4.000000000000000000e+00 2.461745147705078125e+02 2.325000000000000000e+01 5.025000000000000000e+01
1.300000000000000000e+01 7.020307692307698062e+02 3.284448547363281250e+02 5.154327392578125000e+00 0.000000000000000000e+00 5.294117927551269531e-01 3.164246826171875000e+03 3.780141592025756836e+00 1.000000000000000000e+00 2.140594940185546875e+02 2.525000000000000000e+01 5.025000000000000000e+01
4.700000000000000000e+01 6.284769230769231854e+02 3.126645202636718750e+02 5.222900390625000000e+00 0.000000000000000000e+00 1.117647051811218262e+00 3.184010253906250000e+03 3.816481828689575195e+00 4.000000000000000000e+00 2.303730926513671875e+02 2.575000000000000000e+01 5.025000000000000000e+01
4.900000000000000000e+01 5.221769230769231172e+02 3.289512329101562500e+02 5.418853759765625000e+00 0.000000000000000000e+00 1.058823585510253906e+00 3.245002441406250000e+03 3.972846746444702148e+00 4.000000000000000000e+00 2.390455169677734375e+02 2.675000000000000000e+01 5.025000000000000000e+01
6.600000000000000000e+01 5.407538461538462116e+02 3.331781616210937500e+02 5.673645019531250000e+00 0.000000000000000000e+00 8.235294222831726074e-01 3.327460693359375000e+03 3.936590433120727539e+00 4.000000000000000000e+00 2.249753265380859375e+02 2.775000000000000000e+01 5.025000000000000000e+01
2.100000000000000000e+01 5.956538461538464162e+02 3.315913696289062500e+02 5.789001464843750000e+00 0.000000000000000000e+00 2.352941185235977173e-01 3.381699218750000000e+03 3.828429937362670898e+00 3.000000000000000000e+00 2.212607116699218750e+02 2.875000000000000000e+01 5.025000000000000000e+01
7.000000000000000000e+00 5.999538461538460297e+02 3.209728393554687500e+02 5.629852294921875000e+00 0.000000000000000000e+00 2.352941185235977173e-01 3.410464843750000000e+03 4.011056423187255859e+00 1.000000000000000000e+00 9.913691711425781250e+01 3.075000000000000000e+01 5.025000000000000000e+01
8.000000000000000000e+00 5.858769230769230489e+02 3.355695800781250000e+02 4.976531982421875000e+00 0.000000000000000000e+00 2.176470518112182617e+00 3.331287841796875000e+03 3.954276561737060547e+00 1.000000000000000000e+00 1.128058624267578125e+02 3.325000000000000000e+01 5.025000000000000000e+01
1.100000000000000000e+01 5.771692307692309214e+02 3.020957946777343750e+02 4.890014648437500000e+00 0.000000000000000000e+00 1.823529362678527832e+00 3.318977294921875000e+03 3.929584741592407227e+00 1.000000000000000000e+00 1.376412353515625000e+02 3.475000000000000000e+01 5.025000000000000000e+01
1.000000000000000000e+00 5.086000000000001364e+02 2.956375427246093750e+02 5.121643066406250000e+00 0.000000000000000000e+00 1.941176414489746094e+00 3.429851806640625000e+03 3.954874038696289062e+00 1.000000000000000000e+00 1.410500335693359375e+02 4.025000000000000000e+01 5.025000000000000000e+01
2.000000000000000000e+00 4.949615384615383959e+02 2.926911926269531250e+02 5.001281738281250000e+00 0.000000000000000000e+00 2.000000000000000000e+00 3.440684326171875000e+03 3.948700428009033203e+00 1.000000000000000000e+00 1.269865188598632812e+02 4.125000000000000000e+01 5.025000000000000000e+01
7.000000000000000000e+00 4.666153846153843574e+02 2.844582519531250000e+02 4.933166503906250000e+00 0.000000000000000000e+00 1.470588207244873047e+00 3.452236083984375000e+03 3.960728168487548828e+00 1.000000000000000000e+00 1.366279449462890625e+02 4.175000000000000000e+01 5.025000000000000000e+01
0.000000000000000000e+00 4.397076923076921275e+02 2.676234436035156250e+02 4.753540039062500000e+00 0.000000000000000000e+00 2.411764621734619141e+00 3.491139160156250000e+03 3.982270240783691406e+00 1.000000000000000000e+00 1.193383712768554688e+02 4.325000000000000000e+01 5.025000000000000000e+01
1.000000000000000000e+00 3.490076923076922526e+02 2.209643859863281250e+02 5.210510253906250000e+00 0.000000000000000000e+00 1.705882310867309570e+00 3.710172851562500000e+03 4.098303318023681641e+00 1.000000000000000000e+00 4.948295593261718750e+01 4.675000000000000000e+01 5.025000000000000000e+01
4.000000000000000000e+00 3.338692307692307963e+02 2.004794311523437500e+02 5.265106201171875000e+00 0.000000000000000000e+00 2.470588207244873047e+00 3.732342529296875000e+03 4.096775054931640625e+00 1.000000000000000000e+00 4.101073837280273438e+01 4.725000000000000000e+01 5.025000000000000000e+01
1.000000000000000000e+00 3.232692307692306031e+02 1.834217834472656250e+02 5.304626464843750000e+00 0.000000000000000000e+00 2.529411792755126953e+00 3.750555908203125000e+03 4.090108871459960938e+00 1.000000000000000000e+00 3.416706466674804688e+01 4.775000000000000000e+01 5.025000000000000000e+01
1.000000000000000000e+00 3.304846153846155516e+02 1.770958099365234375e+02 5.344146728515625000e+00 0.000000000000000000e+00 1.117647051811218262e+00 3.768769287109375000e+03 4.085069656372070312e+00 1.000000000000000000e+00 2.636934661865234375e+01 4.825000000000000000e+01 5.025000000000000000e+01
1.000000000000000000e+00 3.415153846153845052e+02 1.739706573486328125e+02 5.383666992187500000e+00 0.000000000000000000e+00 2.117647171020507812e+00 3.786982666015625000e+03 4.084331989288330078e+00 1.000000000000000000e+00 1.766300392150878906e+01 4.875000000000000000e+01 5.025000000000000000e+01
1.000000000000000000e+00 3.446230769230768942e+02 1.656091308593750000e+02 5.307006835937500000e+00 0.000000000000000000e+00 1.882352948188781738e+00 3.777433105468750000e+03 4.094158649444580078e+00 1.000000000000000000e+00 1.249991226196289062e+01 4.925000000000000000e+01 5.025000000000000000e+01
1.000000000000000000e+00 3.395230769230767010e+02 1.555928802490234375e+02 5.230316162109375000e+00 0.000000000000000000e+00 2.294117689132690430e+00 3.767883300781250000e+03 4.091942310333251953e+00 1.000000000000000000e+00 6.677546977996826172e+00 4.975000000000000000e+01 5.025000000000000000e+01
1.000000000000000000e+00 3.273230769230768260e+02 1.455321807861328125e+02 5.153656005859375000e+00 0.000000000000000000e+00 2.235294103622436523e+00 3.758333496093750000e+03 4.088665008544921875e+00 1.000000000000000000e+00 1.100003242492675781e+01 5.025000000000000000e+01 5.025000000000000000e+01
1.000000000000000000e+00 3.106999999999998749e+02 1.359085083007812500e+02 5.062530517578125000e+00 0.000000000000000000e+00 2.058823585510253906e+00 3.744642822265625000e+03 4.089344978332519531e+00 1.000000000000000000e+00 1.301812934875488281e+01 5.075000000000000000e+01 5.025000000000000000e+01
0.000000000000000000e+00 2.926769230769231172e+02 1.327524719238281250e+02 4.928100585937500000e+00 0.000000000000000000e+00 8.235294222831726074e-01 3.718528320312500000e+03 4.086934089660644531e+00 1.000000000000000000e+00 1.114481639862060547e+01 5.125000000000000000e+01 5.025000000000000000e+01
1.000000000000000000e+00 2.820000000000001137e+02 1.336360778808593750e+02 4.793670654296875000e+00 0.000000000000000000e+00 1.352941155433654785e+00 3.692414062500000000e+03 4.075087070465087891e+00 1.000000000000000000e+00 3.199220466613769531e+01 5.175000000000000000e+01 5.025000000000000000e+01
1.000000000000000000e+00 2.789538461538460865e+02 1.338374481201171875e+02 4.659210205078125000e+00 0.000000000000000000e+00 2.117647171020507812e+00 3.666299804687500000e+03 4.071187496185302734e+00 1.000000000000000000e+00 2.151124763488769531e+01 5.225000000000000000e+01 5.025000000000000000e+01
2.000000000000000000e+00 2.855307692307692946e+02 1.342438049316406250e+02 4.522766113281250000e+00 0.000000000000000000e+00 1.823529362678527832e+00 3.637744140625000000e+03 4.069428443908691406e+00 1.000000000000000000e+00 3.546777343750000000e+01 5.275000000000000000e+01 5.025000000000000000e+01
0.000000000000000000e+00 2.966461538461538225e+02 1.393390350341796875e+02 4.245880126953125000e+00 0.000000000000000000e+00 2.470588207244873047e+00 3.575750732421875000e+03 4.027208328247070312e+00 1.000000000000000000e+00 9.765464782714843750e+01 5.375000000000000000e+01 5.025000000000000000e+01
0.000000000000000000e+00 2.974153846153845961e+02 1.441764984130859375e+02 4.107421875000000000e+00 0.000000000000000000e+00 2.647058725357055664e+00 3.544753906250000000e+03 3.991571903228759766e+00 1.000000000000000000e+00 1.476154479980468750e+02 5.425000000000000000e+01 5.025000000000000000e+01
1.000000000000000000e+00 3.024153846153845961e+02 1.523732757568359375e+02 3.950256347656250000e+00 0.000000000000000000e+00 1.882352948188781738e+00 3.506269042968750000e+03 3.960270404815673828e+00 1.000000000000000000e+00 2.235674896240234375e+02 5.475000000000000000e+01 5.025000000000000000e+01
1.000000000000000000e+00 3.051000000000000796e+02 1.631326293945312500e+02 3.786834716796875000e+00 0.000000000000000000e+00 2.411764621734619141e+00 3.465288330078125000e+03 3.938151359558105469e+00 1.000000000000000000e+00 1.815377655029296875e+02 5.525000000000000000e+01 5.025000000000000000e+01
1.000000000000000000e+00 3.110999999999999659e+02 1.747928009033203125e+02 3.623443603515625000e+00 0.000000000000000000e+00 3.058823585510253906e+00 3.424307617187500000e+03 3.918377399444580078e+00 1.000000000000000000e+00 2.139141387939453125e+02 5.575000000000000000e+01 5.025000000000000000e+01
1.000000000000000000e+00 3.201846153846153697e+02 1.910374450683593750e+02 3.298400878906250000e+00 0.000000000000000000e+00 2.823529481887817383e+00 3.350475097656250000e+03 3.843447208404541016e+00 1.000000000000000000e+00 2.893678894042968750e+02 5.675000000000000000e+01 5.025000000000000000e+01
4.000000000000000000e+00 3.221384615384615699e+02 1.951402130126953125e+02 3.136779785156250000e+00 0.000000000000000000e+00 2.000000000000000000e+00 3.317623535156250000e+03 3.813518524169921875e+00 1.000000000000000000e+00 2.218945312500000000e+02 5.725000000000000000e+01 5.025000000000000000e+01
1.000000000000000000e+00 3.171846153846154266e+02 1.948723449707031250e+02 2.975128173828125000e+00 0.000000000000000000e+00 2.470588207244873047e+00 3.284771728515625000e+03 3.773738861083984375e+00 1.000000000000000000e+00 3.391576232910156250e+02 5.775000000000000000e+01 5.025000000000000000e+01
0.000000000000000000e+00 2.946692307692306940e+02 1.855166320800781250e+02 2.758148193359375000e+00 0.000000000000000000e+00 2.294117689132690430e+00 3.263926025390625000e+03 3.787460088729858398e+00 1.000000000000000000e+00 3.055620117187500000e+02 5.875000000000000000e+01 5.025000000000000000e+01
0.000000000000000000e+00 2.834000000000000341e+02 1.749133758544921875e+02 2.681518554687500000e+00 0.000000000000000000e+00 2.823529481887817383e+00 3.266960449218750000e+03 3.793394565582275391e+00 1.000000000000000000e+00 2.965870666503906250e+02 5.925000000000000000e+01 5.025000000000000000e+01
0.000000000000000000e+00 2.563923076923076678e+02 1.444937591552734375e+02 2.585449218750000000e+00 0.000000000000000000e+00 1.823529362678527832e+00 3.281915039062500000e+03 3.826776981353759766e+00 1.000000000000000000e+00 2.472017059326171875e+02 6.025000000000000000e+01 5.025000000000000000e+01
1.000000000000000000e+00 2.337076923076922981e+02 1.255012893676757812e+02 2.660858154296875000e+00 0.000000000000000000e+00 1.647058844566345215e+00 3.323526367187500000e+03 3.857076168060302734e+00 1.000000000000000000e+00 2.428709869384765625e+02 6.125000000000000000e+01 5.025000000000000000e+01
0.000000000000000000e+00 2.296153846153846132e+02 1.200947265625000000e+02 2.698547363281250000e+00 0.000000000000000000e+00 1.823529362678527832e+00 3.344332031250000000e+03 3.877423048019409180e+00 1.000000000000000000e+00 2.400000305175781250e+02 6.175000000000000000e+01 5.025000000000000000e+01
1.000000000000000000e+00 2.206461538461538510e+02 1.171087036132812500e+02 2.799316406250000000e+00 0.000000000000000000e+00 2.000000000000000000e+00 3.365613525390625000e+03 3.899681091308593750e+00 1.000000000000000000e+00 2.223447875976562500e+02 6.225000000000000000e+01 5.025000000000000000e+01
1.000000000000000000e+00 2.155615384615384755e+02 1.149163360595703125e+02 2.921142578125000000e+00 0.000000000000000000e+00 1.470588207244873047e+00 3.387053466796875000e+03 3.917106628417968750e+00 1.000000000000000000e+00 1.524803771972656250e+02 6.275000000000000000e+01 5.025000000000000000e+01
0.000000000000000000e+00 2.147615384615384926e+02 1.074651412963867188e+02 3.042938232421875000e+00 0.000000000000000000e+00 1.529411792755126953e+00 3.408493408203125000e+03 3.926539897918701172e+00 1.000000000000000000e+00 1.872868499755859375e+02 6.325000000000000000e+01 5.025000000000000000e+01
1.000000000000000000e+00 2.080538461538461661e+02 1.029233093261718750e+02 3.164733886718750000e+00 0.000000000000000000e+00 1.411764740943908691e+00 3.429933349609375000e+03 3.942543029785156250e+00 1.000000000000000000e+00 1.219822235107421875e+02 6.375000000000000000e+01 5.025000000000000000e+01
0.000000000000000000e+00 2.074461538461538339e+02 9.990744781494140625e+01 3.267700195312500000e+00 0.000000000000000000e+00 2.411764621734619141e+00 3.434792236328125000e+03 3.943053483963012695e+00 1.000000000000000000e+00 9.936236572265625000e+01 6.425000000000000000e+01 5.025000000000000000e+01
0.000000000000000000e+00 2.047615384615384642e+02 9.998576354980468750e+01 3.370697021484375000e+00 0.000000000000000000e+00 2.529411792755126953e+00 3.439650878906250000e+03 3.932579994201660156e+00 1.000000000000000000e+00 1.502098846435546875e+02 6.475000000000000000e+01 5.025000000000000000e+01
0.000000000000000000e+00 2.050538461538462229e+02 9.943278503417968750e+01 3.473663330078125000e+00 0.000000000000000000e+00 1.294117689132690430e+00 3.444509521484375000e+03 3.908832788467407227e+00 1.000000000000000000e+00 1.470150146484375000e+02 6.525000000000000000e+01 5.025000000000000000e+01
0.000000000000000000e+00 2.112999999999999261e+02 1.027985763549804688e+02 3.537017822265625000e+00 0.000000000000000000e+00 1.823529362678527832e+00 3.440634521484375000e+03 3.877827882766723633e+00 1.000000000000000000e+00 2.188484954833984375e+02 6.575000000000000000e+01 5.025000000000000000e+01
1.000000000000000000e+00 2.133307692307692207e+02 1.217122116088867188e+02 3.481567382812500000e+00 0.000000000000000000e+00 1.588235259056091309e+00 3.410558593750000000e+03 3.837792158126831055e+00 1.000000000000000000e+00 2.219410247802734375e+02 6.625000000000000000e+01 5.025000000000000000e+01
0.000000000000000000e+00 2.274615384615384244e+02 1.414566345214843750e+02 3.249877929687500000e+00 0.000000000000000000e+00 1.647058844566345215e+00 3.310841064453125000e+03 3.761889457702636719e+00 1.000000000000000000e+00 3.264411315917968750e+02 6.775000000000000000e+01 5.025000000000000000e+01
2.800000000000000000e+01 1.406115384615384301e+03 5.286075439453125000e+02 1.075949096679687500e+01 0.000000000000000000e+00 0.000000000000000000e+00 4.102900390625000000e+03 4.103898525238037109e+00 3.000000000000000000e+00 1.659732971191406250e+02 -4.250000000000000000e+00 5.075000000000000000e+01
2.400000000000000000e+01 1.478992307692307577e+03 5.216942749023437500e+02 1.062036132812500000e+01 0.000000000000000000e+00 0.000000000000000000e+00 4.067772949218750000e+03 4.073854923248291016e+00 3.000000000000000000e+00 1.503616790771484375e+02 -3.750000000000000000e+00 5.075000000000000000e+01
1.600000000000000000e+01 1.022653846153846530e+03 4.893082580566406250e+02 8.347564697265625000e+00 0.000000000000000000e+00 0.000000000000000000e+00 3.795668457031250000e+03 3.985445499420166016e+00 1.000000000000000000e+00 2.494786376953125000e+02 6.250000000000000000e+00 5.075000000000000000e+01
7.000000000000000000e+00 8.472538461538463253e+02 3.916510925292968750e+02 7.942016601562500000e+00 0.000000000000000000e+00 0.000000000000000000e+00 3.691802246093750000e+03 4.023190498352050781e+00 1.000000000000000000e+00 1.256044921875000000e+02 7.250000000000000000e+00 5.075000000000000000e+01
1.800000000000000000e+01 8.273307692307687375e+02 4.278918762207031250e+02 7.761077880859375000e+00 0.000000000000000000e+00 0.000000000000000000e+00 3.645025634765625000e+03 3.920137166976928711e+00 1.000000000000000000e+00 2.589476623535156250e+02 7.750000000000000000e+00 5.075000000000000000e+01
1.500000000000000000e+01 7.944153846153845961e+02 4.535445251464843750e+02 7.601959228515625000e+00 0.000000000000000000e+00 0.000000000000000000e+00 3.603405517578125000e+03 3.849548339843750000e+00 1.000000000000000000e+00 3.174274902343750000e+02 8.250000000000000000e+00 5.075000000000000000e+01
6.100000000000000000e+01 7.001461538461539931e+02 4.212205200195312500e+02 7.018432617187500000e+00 0.000000000000000000e+00 0.000000000000000000e+00 3.451301513671875000e+03 3.672149896621704102e+00 4.000000000000000000e+00 4.238461608886718750e+02 1.025000000000000000e+01 5.075000000000000000e+01
2.400000000000000000e+01 6.599692307692309896e+02 4.284148864746093750e+02 6.889587402343750000e+00 0.000000000000000000e+00 0.000000000000000000e+00 3.417896484375000000e+03 3.685179233551025391e+00 3.000000000000000000e+00 5.834567871093750000e+02 1.075000000000000000e+01 5.075000000000000000e+01
1.000000000000000000e+01 6.371307692307693742e+02 3.755132751464843750e+02 6.521179199218750000e+00 0.000000000000000000e+00 0.000000000000000000e+00 3.341710205078125000e+03 3.776959896087646484e+00 1.000000000000000000e+00 4.863275451660156250e+02 1.325000000000000000e+01 5.075000000000000000e+01
1.300000000000000000e+01 6.527230769230772012e+02 3.228570556640625000e+02 6.356445312500000000e+00 0.000000000000000000e+00 0.000000000000000000e+00 3.336311279296875000e+03 3.811800956726074219e+00 1.000000000000000000e+00 3.118829345703125000e+02 1.425000000000000000e+01 5.075000000000000000e+01
3.300000000000000000e+01 9.148076923076926050e+02 5.210087280273437500e+02 6.107238769531250000e+00 0.000000000000000000e+00 0.000000000000000000e+00 3.329358886718750000e+03 3.625502586364746094e+00 3.000000000000000000e+00 1.068143188476562500e+03 1.575000000000000000e+01 5.075000000000000000e+01
6.700000000000000000e+01 7.917692307692309441e+02 3.988592834472656250e+02 6.023468017578125000e+00 0.000000000000000000e+00 4.705882370471954346e-01 3.327423095703125000e+03 3.642560482025146484e+00 4.000000000000000000e+00 5.335010375976562500e+02 1.625000000000000000e+01 5.075000000000000000e+01
1.800000000000000000e+01 7.314230769230766782e+02 3.046778869628906250e+02 5.939697265625000000e+00 0.000000000000000000e+00 2.941176593303680420e-01 3.325487304687500000e+03 3.712829589843750000e+00 1.000000000000000000e+00 2.782361755371093750e+02 1.675000000000000000e+01 5.075000000000000000e+01
2.000000000000000000e+00 6.209076923076920593e+02 2.972361755371093750e+02 5.864959716796875000e+00 0.000000000000000000e+00 2.941176593303680420e-01 3.327221435546875000e+03 3.905868530273437500e+00 1.000000000000000000e+00 1.461931915283203125e+02 1.775000000000000000e+01 5.075000000000000000e+01
4.000000000000000000e+00 6.427615384615385210e+02 2.977863159179687500e+02 5.834228515625000000e+00 0.000000000000000000e+00 0.000000000000000000e+00 3.328488769531250000e+03 3.890635728836059570e+00 1.000000000000000000e+00 2.131969757080078125e+02 1.825000000000000000e+01 5.075000000000000000e+01
6.400000000000000000e+01 6.689769230769229580e+02 3.258710937500000000e+02 5.803497314453125000e+00 0.000000000000000000e+00 0.000000000000000000e+00 3.329756103515625000e+03 3.865473985671997070e+00 4.000000000000000000e+00 2.587360534667968750e+02 1.875000000000000000e+01 5.075000000000000000e+01
2.200000000000000000e+01 6.670846153846157449e+02 3.420926818847656250e+02 5.407257080078125000e+00 0.000000000000000000e+00 0.000000000000000000e+00 3.238762939453125000e+03 3.816845417022705078e+00 3.000000000000000000e+00 2.667979125976562500e+02 2.075000000000000000e+01 5.075000000000000000e+01
4.500000000000000000e+01 6.023538461538462343e+02 3.184656982421875000e+02 5.353912353515625000e+00 0.000000000000000000e+00 0.000000000000000000e+00 3.206300292968750000e+03 3.836387872695922852e+00 4.000000000000000000e+00 1.989369354248046875e+02 2.625000000000000000e+01 5.075000000000000000e+01
1.400000000000000000e+01 6.154999999999998863e+02 3.368023376464843750e+02 5.739715576171875000e+00 0.000000000000000000e+00 8.235294222831726074e-01 3.347575195312500000e+03 3.827493667602539062e+00 1.000000000000000000e+00 1.820599670410156250e+02 2.875000000000000000e+01 5.075000000000000000e+01
1.400000000000000000e+01 6.377846153846156767e+02 3.344827575683593750e+02 5.732696533203125000e+00 0.000000000000000000e+00 9.411764740943908691e-01 3.358182861328125000e+03 3.853354930877685547e+00 1.000000000000000000e+00 1.606826019287109375e+02 2.925000000000000000e+01 5.075000000000000000e+01
4.100000000000000000e+01 6.303153846153844597e+02 3.296268310546875000e+02 5.725677490234375000e+00 0.000000000000000000e+00 8.823529481887817383e-01 3.368790771484375000e+03 3.919407606124877930e+00 3.000000000000000000e+00 1.503325347900390625e+02 2.975000000000000000e+01 5.075000000000000000e+01
2.600000000000000000e+01 6.100692307692307850e+02 3.310242614746093750e+02 5.493530273437500000e+00 0.000000000000000000e+00 0.000000000000000000e+00 3.347495361328125000e+03 3.986069679260253906e+00 3.000000000000000000e+00 9.835674285888671875e+01 3.075000000000000000e+01 5.075000000000000000e+01
1.400000000000000000e+01 6.115076923076921958e+02 3.260119934082031250e+02 5.041137695312500000e+00 0.000000000000000000e+00 1.882352948188781738e+00 3.291069335937500000e+03 3.924918413162231445e+00 1.000000000000000000e+00 1.286432037353515625e+02 3.225000000000000000e+01 5.075000000000000000e+01
5.300000000000000000e+01 5.778230769230769965e+02 3.079690856933593750e+02 4.613647460937500000e+00 0.000000000000000000e+00 2.529411792755126953e+00 3.228415283203125000e+03 3.877708196640014648e+00 4.000000000000000000e+00 1.297904663085937500e+02 3.475000000000000000e+01 5.075000000000000000e+01
1.000000000000000000e+00 4.393153846153844597e+02 2.628547363281250000e+02 4.360900878906250000e+00 0.000000000000000000e+00 2.470588207244873047e+00 3.426475585937500000e+03 3.905870199203491211e+00 1.000000000000000000e+00 1.547167205810546875e+02 4.425000000000000000e+01 5.075000000000000000e+01
3.000000000000000000e+00 3.839461538461537202e+02 2.331894531250000000e+02 4.790618896484375000e+00 0.000000000000000000e+00 2.235294103622436523e+00 3.592280517578125000e+03 4.054538726806640625e+00 1.000000000000000000e+00 5.248455047607421875e+01 4.675000000000000000e+01 5.075000000000000000e+01
1.000000000000000000e+00 3.807999999999998977e+02 1.899227294921875000e+02 5.004516601562500000e+00 0.000000000000000000e+00 1.647058844566345215e+00 3.685472900390625000e+03 4.024396419525146484e+00 1.000000000000000000e+00 8.171752929687500000e+01 4.875000000000000000e+01 5.075000000000000000e+01
2.000000000000000000e+00 3.739999999999999432e+02 1.744025421142578125e+02 4.873168945312500000e+00 0.000000000000000000e+00 2.411764621734619141e+00 3.671283203125000000e+03 4.032954216003417969e+00 1.000000000000000000e+00 2.736074256896972656e+01 4.975000000000000000e+01 5.075000000000000000e+01
1.000000000000000000e+00 3.652230769230768033e+02 1.634579010009765625e+02 4.807495117187500000e+00 0.000000000000000000e+00 1.705882310867309570e+00 3.664188476562500000e+03 4.039321422576904297e+00 1.000000000000000000e+00 2.149997329711914062e+01 5.025000000000000000e+01 5.075000000000000000e+01
4.000000000000000000e+00 3.486230769230770079e+02 1.573022308349609375e+02 4.726715087890625000e+00 0.000000000000000000e+00 3.117647171020507812e+00 3.652276123046875000e+03 4.040461540222167969e+00 1.000000000000000000e+00 2.031730461120605469e+01 5.075000000000000000e+01 5.075000000000000000e+01
0.000000000000000000e+00 3.308230769230768260e+02 1.570689392089843750e+02 4.600524902343750000e+00 0.000000000000000000e+00 1.588235259056091309e+00 3.625911621093750000e+03 4.032398223876953125e+00 1.000000000000000000e+00 2.282956314086914062e+01 5.125000000000000000e+01 5.075000000000000000e+01
0.000000000000000000e+00 3.218615384615386006e+02 1.530822906494140625e+02 4.348205566406250000e+00 0.000000000000000000e+00 2.470588207244873047e+00 3.573182617187500000e+03 4.009870529174804688e+00 1.000000000000000000e+00 4.698789978027343750e+01 5.225000000000000000e+01 5.075000000000000000e+01
0.000000000000000000e+00 3.236615384615384983e+02 1.486587677001953125e+02 4.206298828125000000e+00 0.000000000000000000e+00 2.411764621734619141e+00 3.541287841796875000e+03 4.010563850402832031e+00 1.000000000000000000e+00 1.165039901733398438e+02 5.275000000000000000e+01 5.075000000000000000e+01
1.000000000000000000e+00 3.214307692307692150e+02 1.480188751220703125e+02 4.048675537109375000e+00 0.000000000000000000e+00 3.058823585510253906e+00 3.503862548828125000e+03 3.995697498321533203e+00 1.000000000000000000e+00 8.377025604248046875e+01 5.325000000000000000e+01 5.075000000000000000e+01
1.000000000000000000e+00 3.250846153846152902e+02 1.510960540771484375e+02 3.891052246093750000e+00 0.000000000000000000e+00 2.411764621734619141e+00 3.466437255859375000e+03 3.970219373703002930e+00 1.000000000000000000e+00 1.543089294433593750e+02 5.375000000000000000e+01 5.075000000000000000e+01
1.000000000000000000e+00 3.246923076923077360e+02 1.603482360839843750e+02 3.733398437500000000e+00 0.000000000000000000e+00 2.705882310867309570e+00 3.429011718750000000e+03 3.945507764816284180e+00 1.000000000000000000e+00 1.705956878662109375e+02 5.425000000000000000e+01 5.075000000000000000e+01
0.000000000000000000e+00 3.214769230769229011e+02 1.752995300292968750e+02 3.553131103515625000e+00 0.000000000000000000e+00 2.000000000000000000e+00 3.385207519531250000e+03 3.929499149322509766e+00 1.000000000000000000e+00 1.085486373901367188e+02 5.475000000000000000e+01 5.075000000000000000e+01
1.000000000000000000e+00 2.965384615384613767e+02 1.882832946777343750e+02 2.272186279296875000e+00 0.000000000000000000e+00 2.411764621734619141e+00 3.149042480468750000e+03 3.749449729919433594e+00 1.000000000000000000e+00 2.730705566406250000e+02 5.925000000000000000e+01 5.075000000000000000e+01
1.000000000000000000e+00 2.885076923076924231e+02 1.765476226806640625e+02 2.211669921875000000e+00 0.000000000000000000e+00 2.000000000000000000e+00 3.157274414062500000e+03 3.742711067199707031e+00 1.000000000000000000e+00 3.278412170410156250e+02 5.975000000000000000e+01 5.075000000000000000e+01
1.000000000000000000e+00 2.472615384615384642e+02 1.418993377685546875e+02 2.386413574218750000e+00 0.000000000000000000e+00 2.117647171020507812e+00 3.253976318359375000e+03 3.817735910415649414e+00 1.000000000000000000e+00 2.501314086914062500e+02 6.175000000000000000e+01 5.075000000000000000e+01
1.000000000000000000e+00 2.389923076923076053e+02 1.341341552734375000e+02 2.495910644531250000e+00 0.000000000000000000e+00 2.588235378265380859e+00 3.278243896484375000e+03 3.831554651260375977e+00 1.000000000000000000e+00 2.500126647949218750e+02 6.225000000000000000e+01 5.075000000000000000e+01
1.000000000000000000e+00 2.362538461538462968e+02 1.270338973999023438e+02 2.622344970703125000e+00 0.000000000000000000e+00 1.529411792755126953e+00 3.301782714843750000e+03 3.839471817016601562e+00 1.000000000000000000e+00 2.446752471923828125e+02 6.275000000000000000e+01 5.075000000000000000e+01
0.000000000000000000e+00 2.353384615384615586e+02 1.188993301391601562e+02 2.748779296875000000e+00 0.000000000000000000e+00 2.000000000000000000e+00 3.325321533203125000e+03 3.844389915466308594e+00 1.000000000000000000e+00 2.274864044189453125e+02 6.325000000000000000e+01 5.075000000000000000e+01
0.000000000000000000e+00 2.331307692307692037e+02 1.133872528076171875e+02 2.875213623046875000e+00 0.000000000000000000e+00 2.176470518112182617e+00 3.348860595703125000e+03 3.854516029357910156e+00 1.000000000000000000e+00 2.172576751708984375e+02 6.375000000000000000e+01 5.075000000000000000e+01
0.000000000000000000e+00 2.273923076923077247e+02 1.075881958007812500e+02 2.974121093750000000e+00 0.000000000000000000e+00 1.823529362678527832e+00 3.355265869140625000e+03 3.881382226943969727e+00 1.000000000000000000e+00 1.668938140869140625e+02 6.425000000000000000e+01 5.075000000000000000e+01
1.000000000000000000e+00 2.233538461538462059e+02 1.097153167724609375e+02 3.073059082031250000e+00 0.000000000000000000e+00 2.470588207244873047e+00 3.361671386718750000e+03 3.882950782775878906e+00 1.000000000000000000e+00 1.183571929931640625e+02 6.475000000000000000e+01 5.075000000000000000e+01
0.000000000000000000e+00 2.241615384615384130e+02 1.133581924438476562e+02 3.171966552734375000e+00 0.000000000000000000e+00 2.529411792755126953e+00 3.368076904296875000e+03 3.849109888076782227e+00 1.000000000000000000e+00 1.523404998779296875e+02 6.525000000000000000e+01 5.075000000000000000e+01
1.000000000000000000e+00 2.331769230769230603e+02 1.498717041015625000e+02 3.079406738281250000e+00 0.000000000000000000e+00 2.705882310867309570e+00 3.284709228515625000e+03 3.742923021316528320e+00 1.000000000000000000e+00 3.148465270996093750e+02 6.725000000000000000e+01 5.075000000000000000e+01
1.000000000000000000e+00 2.350461538461538282e+02 1.480690307617187500e+02 2.970489501953125000e+00 0.000000000000000000e+00 2.235294103622436523e+00 3.248827148437500000e+03 3.736511945724487305e+00 1.000000000000000000e+00 2.918018188476562500e+02 6.775000000000000000e+01 5.075000000000000000e+01
1.200000000000000000e+01 9.289846153846156085e+02 3.980159912109375000e+02 1.012402343750000000e+01 0.000000000000000000e+00 0.000000000000000000e+00 3.986443115234375000e+03 4.040466785430908203e+00 1.000000000000000000e+00 9.106877136230468750e+01 -2.250000000000000000e+00 5.125000000000000000e+01
4.000000000000000000e+01 8.649538461538462570e+02 3.931739807128906250e+02 9.130737304687500000e+00 0.000000000000000000e+00 0.000000000000000000e+00 3.913569580078125000e+03 4.120386600494384766e+00 3.000000000000000000e+00 1.629179573059082031e+01 4.750000000000000000e+00 5.125000000000000000e+01
5.000000000000000000e+00 8.893461538461534701e+02 4.114176330566406250e+02 8.126922607421875000e+00 0.000000000000000000e+00 0.000000000000000000e+00 3.707600341796875000e+03 4.135526180267333984e+00 1.000000000000000000e+00 3.978298950195312500e+01 6.750000000000000000e+00 5.125000000000000000e+01
9.000000000000000000e+00 8.994538461538462570e+02 4.429172058105468750e+02 7.930480957031250000e+00 0.000000000000000000e+00 0.000000000000000000e+00 3.663423828125000000e+03 4.063462257385253906e+00 1.000000000000000000e+00 2.559878387451171875e+02 7.250000000000000000e+00 5.125000000000000000e+01
5.900000000000000000e+01 8.974999999999998863e+02 4.721484069824218750e+02 7.760742187500000000e+00 0.000000000000000000e+00 0.000000000000000000e+00 3.626572753906250000e+03 3.866757631301879883e+00 4.000000000000000000e+00 3.618285522460937500e+02 7.750000000000000000e+00 5.125000000000000000e+01
4.900000000000000000e+01 8.715923076923081680e+02 5.075303955078125000e+02 7.617767333984375000e+00 0.000000000000000000e+00 0.000000000000000000e+00 3.597046875000000000e+03 3.750266551971435547e+00 4.000000000000000000e+00 4.353368225097656250e+02 8.250000000000000000e+00 5.125000000000000000e+01
3.600000000000000000e+01 5.484307692307692150e+02 3.235116577148437500e+02 6.655242919921875000e+00 0.000000000000000000e+00 0.000000000000000000e+00 3.404499511718750000e+03 4.006159782409667969e+00 3.000000000000000000e+00 1.598443145751953125e+02 1.375000000000000000e+01 5.125000000000000000e+01
3.000000000000000000e+00 6.550076923076923094e+02 2.896327209472656250e+02 6.382171630859375000e+00 0.000000000000000000e+00 0.000000000000000000e+00 3.387599121093750000e+03 3.905803442001342773e+00 1.000000000000000000e+00 2.156177215576171875e+02 1.575000000000000000e+01 5.125000000000000000e+01
3.000000000000000000e+00 5.786000000000000227e+02 2.756836853027343750e+02 6.136413574218750000e+00 0.000000000000000000e+00 0.000000000000000000e+00 3.371294433593750000e+03 3.914616584777832031e+00 1.000000000000000000e+00 1.785376281738281250e+02 1.775000000000000000e+01 5.125000000000000000e+01
4.000000000000000000e+00 5.851153846153847553e+02 3.136174316406250000e+02 6.046600341796875000e+00 0.000000000000000000e+00 0.000000000000000000e+00 3.364822265625000000e+03 3.911479234695434570e+00 1.000000000000000000e+00 1.774081420898437500e+02 1.875000000000000000e+01 5.125000000000000000e+01
2.100000000000000000e+01 5.492923076923074177e+02 2.929979248046875000e+02 5.462738037109375000e+00 0.000000000000000000e+00 0.000000000000000000e+00 3.226461181640625000e+03 3.856826782226562500e+00 3.000000000000000000e+00 1.361696472167968750e+02 2.175000000000000000e+01 5.125000000000000000e+01
1.300000000000000000e+01 5.586230769230769511e+02 2.752910156250000000e+02 5.265838623046875000e+00 0.000000000000000000e+00 0.000000000000000000e+00 3.175317138671875000e+03 3.822633266448974609e+00 1.000000000000000000e+00 1.900337829589843750e+02 2.325000000000000000e+01 5.125000000000000000e+01
4.000000000000000000e+01 6.256692307692309214e+02 3.216797790527343750e+02 5.186309814453125000e+00 0.000000000000000000e+00 0.000000000000000000e+00 3.158047851562500000e+03 3.836211681365966797e+00 3.000000000000000000e+00 1.665733642578125000e+02 2.475000000000000000e+01 5.125000000000000000e+01
5.700000000000000000e+01 6.565307692307693515e+02 3.163868408203125000e+02 5.231750488281250000e+00 0.000000000000000000e+00 0.000000000000000000e+00 3.171113525390625000e+03 3.817808866500854492e+00 4.000000000000000000e+00 1.657427825927734375e+02 2.525000000000000000e+01 5.125000000000000000e+01
3.400000000000000000e+01 6.186384615384616836e+02 3.169004821777343750e+02 5.401184082031250000e+00 0.000000000000000000e+00 5.882352963089942932e-02 3.223477539062500000e+03 3.860750913619995117e+00 3.000000000000000000e+00 1.596784210205078125e+02 2.675000000000000000e+01 5.125000000000000000e+01
6.100000000000000000e+01 6.278461538461534701e+02 3.368999023437500000e+02 5.612457275390625000e+00 0.000000000000000000e+00 1.176470637321472168e+00 3.296892578125000000e+03 3.828297853469848633e+00 4.000000000000000000e+00 2.045933990478515625e+02 2.825000000000000000e+01 5.125000000000000000e+01
6.600000000000000000e+01 6.290307692307693515e+02 3.233644409179687500e+02 5.312591552734375000e+00 0.000000000000000000e+00 7.647058963775634766e-01 3.284853759765625000e+03 3.934092283248901367e+00 4.000000000000000000e+00 1.313358306884765625e+02 3.075000000000000000e+01 5.125000000000000000e+01
5.400000000000000000e+01 4.818230769230771102e+02 2.758841247558593750e+02 4.092468261718750000e+00 0.000000000000000000e+00 1.823529362678527832e+00 3.235243652343750000e+03 3.874080419540405273e+00 4.000000000000000000e+00 1.016230392456054688e+02 4.175000000000000000e+01 5.125000000000000000e+01
4.000000000000000000e+00 4.700384615384618314e+02 2.804359130859375000e+02 3.908172607421875000e+00 0.000000000000000000e+00 2.000000000000000000e+00 3.241842041015625000e+03 3.863922834396362305e+00 1.000000000000000000e+00 1.534979705810546875e+02 4.275000000000000000e+01 5.125000000000000000e+01
2.000000000000000000e+00 4.160076923076924800e+02 2.219991760253906250e+02 4.596862792968750000e+00 0.000000000000000000e+00 2.058823585510253906e+00 3.534255126953125000e+03 4.000626087188720703e+00 1.000000000000000000e+00 9.149224090576171875e+01 4.775000000000000000e+01 5.125000000000000000e+01
0.000000000000000000e+00 3.888538461538461206e+02 1.885435180664062500e+02 4.502868652343750000e+00 0.000000000000000000e+00 2.764705896377563477e+00 3.563605957031250000e+03 3.946425437927246094e+00 1.000000000000000000e+00 6.995143127441406250e+01 5.075000000000000000e+01 5.125000000000000000e+01
1.000000000000000000e+00 3.748615384615385437e+02 1.920934448242187500e+02 4.373474121093750000e+00 0.000000000000000000e+00 1.588235259056091309e+00 3.535698974609375000e+03 3.944031715393066406e+00 1.000000000000000000e+00 4.001633834838867188e+01 5.125000000000000000e+01 5.125000000000000000e+01
7.000000000000000000e+00 3.743461538461538680e+02 1.933752899169921875e+02 4.244079589843750000e+00 0.000000000000000000e+00 2.235294103622436523e+00 3.507791992187500000e+03 3.943083763122558594e+00 1.000000000000000000e+00 5.616159439086914062e+01 5.175000000000000000e+01 5.125000000000000000e+01
1.000000000000000000e+00 3.684461538461540613e+02 1.852004699707031250e+02 4.114715576171875000e+00 0.000000000000000000e+00 2.117647171020507812e+00 3.479885009765625000e+03 3.946784019470214844e+00 1.000000000000000000e+00 8.083637237548828125e+01 5.225000000000000000e+01 5.125000000000000000e+01
1.000000000000000000e+00 3.659307692307692150e+02 1.757850646972656250e+02 3.952270507812500000e+00 0.000000000000000000e+00 2.823529481887817383e+00 3.442799560546875000e+03 3.952220916748046875e+00 1.000000000000000000e+00 5.712685012817382812e+01 5.275000000000000000e+01 5.125000000000000000e+01
0.000000000000000000e+00 3.620769230769229239e+02 1.761495666503906250e+02 3.561218261718750000e+00 0.000000000000000000e+00 2.470588207244873047e+00 3.350272216796875000e+03 3.938497304916381836e+00 1.000000000000000000e+00 6.690753936767578125e+01 5.375000000000000000e+01 5.125000000000000000e+01
1.000000000000000000e+00 3.491538461538459615e+02 1.886781311035156250e+02 3.365722656250000000e+00 0.000000000000000000e+00 1.882352948188781738e+00 3.304008544921875000e+03 3.913778066635131836e+00 1.000000000000000000e+00 1.370745086669921875e+02 5.425000000000000000e+01 5.125000000000000000e+01
1.000000000000000000e+00 3.481384615384613426e+02 2.022140045166015625e+02 3.153137207031250000e+00 0.000000000000000000e+00 3.117647171020507812e+00 3.254882324218750000e+03 3.888708353042602539e+00 1.000000000000000000e+00 2.250067138671875000e+02 5.475000000000000000e+01 5.125000000000000000e+01
0.000000000000000000e+00 3.480769230769232649e+02 2.131706848144531250e+02 2.716644287109375000e+00 0.000000000000000000e+00 1.588235259056091309e+00 3.154721679687500000e+03 3.855601549148559570e+00 1.000000000000000000e+00 2.066237640380859375e+02 5.575000000000000000e+01 5.125000000000000000e+01
1.000000000000000000e+00 3.419538461538459728e+02 2.187734527587890625e+02 2.498382568359375000e+00 0.000000000000000000e+00 2.294117689132690430e+00 3.104641357421875000e+03 3.834329128265380859e+00 1.000000000000000000e+00 2.138556976318359375e+02 5.625000000000000000e+01 5.125000000000000000e+01
1.000000000000000000e+00 3.429769230769230717e+02 2.238705139160156250e+02 2.358032226562500000e+00 0.000000000000000000e+00 2.588235378265380859e+00 3.077440673828125000e+03 3.792679548263549805e+00 1.000000000000000000e+00 2.651117858886718750e+02 5.675000000000000000e+01 5.125000000000000000e+01
1.000000000000000000e+00 3.107538461538462116e+02 1.967709808349609375e+02 1.876770019531250000e+00 0.000000000000000000e+00 2.941176414489746094e+00 3.032301757812500000e+03 3.736714124679565430e+00 1.000000000000000000e+00 2.527300109863281250e+02 5.925000000000000000e+01 5.125000000000000000e+01
5.000000000000000000e+00 2.685153846153845620e+02 1.546065673828125000e+02 2.126190185546875000e+00 0.000000000000000000e+00 2.352941274642944336e+00 3.171422363281250000e+03 3.765720367431640625e+00 1.000000000000000000e+00 2.628200073242187500e+02 6.175000000000000000e+01 5.125000000000000000e+01
1.600000000000000000e+01 2.641153846153848122e+02 1.386898651123046875e+02 2.245788574218750000e+00 0.000000000000000000e+00 2.176470518112182617e+00 3.199400878906250000e+03 3.792648077011108398e+00 1.000000000000000000e+00 2.250380096435546875e+02 6.225000000000000000e+01 5.125000000000000000e+01
1.000000000000000000e+00 2.599384615384615245e+02 1.301240539550781250e+02 2.375457763671875000e+00 0.000000000000000000e+00 2.705882310867309570e+00 3.225339111328125000e+03 3.805837631225585938e+00 1.000000000000000000e+00 2.250364532470703125e+02 6.275000000000000000e+01 5.125000000000000000e+01
1.000000000000000000e+00 2.581307692307692605e+02 1.245165405273437500e+02 2.505126953125000000e+00 0.000000000000000000e+00 2.411764621734619141e+00 3.251277099609375000e+03 3.810354471206665039e+00 1.000000000000000000e+00 2.343245391845703125e+02 6.325000000000000000e+01 5.125000000000000000e+01
1.000000000000000000e+00 2.521846153846152845e+02 1.223628005981445312e+02 2.634796142578125000e+00 0.000000000000000000e+00 1.882352948188781738e+00 3.277215332031250000e+03 3.825867414474487305e+00 1.000000000000000000e+00 2.254527282714843750e+02 6.375000000000000000e+01 5.125000000000000000e+01
0.000000000000000000e+00 2.489923076923077758e+02 1.230557937622070312e+02 2.704101562500000000e+00 0.000000000000000000e+00 1.705882310867309570e+00 3.281136718750000000e+03 3.844585657119750977e+00 1.000000000000000000e+00 1.311502075195312500e+02 6.425000000000000000e+01 5.125000000000000000e+01
0.000000000000000000e+00 2.455538461538461092e+02 1.267073898315429688e+02 2.773406982421875000e+00 0.000000000000000000e+00 1.588235259056091309e+00 3.285057861328125000e+03 3.833415985107421875e+00 1.000000000000000000e+00 2.035362548828125000e+02 6.475000000000000000e+01 5.125000000000000000e+01
1.000000000000000000e+00 2.440615384615384471e+02 1.326032867431640625e+02 2.842681884765625000e+00 0.000000000000000000e+00 2.176470518112182617e+00 3.288979248046875000e+03 3.800926208496093750e+00 1.000000000000000000e+00 2.034880523681640625e+02 6.525000000000000000e+01 5.125000000000000000e+01
0.000000000000000000e+00 2.433846153846153868e+02 1.492809295654296875e+02 2.728332519531250000e+00 0.000000000000000000e+00 2.235294103622436523e+00 3.228287597656250000e+03 3.729594230651855469e+00 1.000000000000000000e+00 2.859591064453125000e+02 6.675000000000000000e+01 5.125000000000000000e+01
1.000000000000000000e+00 2.445230769230768999e+02 1.520542144775390625e+02 2.654418945312500000e+00 0.000000000000000000e+00 2.647058725357055664e+00 3.200006591796875000e+03 3.712891340255737305e+00 1.000000000000000000e+00 2.509529266357421875e+02 6.725000000000000000e+01 5.125000000000000000e+01
1.600000000000000000e+01 1.527599999999999909e+03 5.718320922851562500e+02 1.081600952148437500e+01 0.000000000000000000e+00 0.000000000000000000e+00 4.210021972656250000e+03 3.990286350250244141e+00 1.000000000000000000e+00 2.779719543457031250e+02 -9.250000000000000000e+00 5.175000000000000000e+01
1.100000000000000000e+01 1.443992307692308259e+03 5.174335327148437500e+02 9.764099121093750000e+00 0.000000000000000000e+00 0.000000000000000000e+00 3.919613525390625000e+03 3.346611261367797852e+00 1.000000000000000000e+00 2.965553894042968750e+02 -3.250000000000000000e+00 5.175000000000000000e+01
4.500000000000000000e+01 1.011423076923076792e+03 4.327250366210937500e+02 9.757537841796875000e+00 0.000000000000000000e+00 0.000000000000000000e+00 3.920809814453125000e+03 4.002108097076416016e+00 4.000000000000000000e+00 1.592286224365234375e+02 -2.750000000000000000e+00 5.175000000000000000e+01
1.400000000000000000e+01 8.380076923076923094e+02 4.058507385253906250e+02 9.750946044921875000e+00 0.000000000000000000e+00 0.000000000000000000e+00 3.922006103515625000e+03 4.036510467529296875e+00 1.000000000000000000e+00 8.487362670898437500e+01 -2.250000000000000000e+00 5.175000000000000000e+01
6.000000000000000000e+00 8.934615384615385665e+02 3.917696533203125000e+02 9.202667236328125000e+00 0.000000000000000000e+00 0.000000000000000000e+00 3.860700439453125000e+03 4.033967494964599609e+00 1.000000000000000000e+00 2.101824045181274414e+00 4.750000000000000000e+00 5.175000000000000000e+01
7.500000000000000000e+01 6.980000000000002274e+02 4.846574096679687500e+02 7.191131591796875000e+00 0.000000000000000000e+00 0.000000000000000000e+00 3.522333740234375000e+03 3.743847846984863281e+00 4.000000000000000000e+00 3.150507202148437500e+02 1.025000000000000000e+01 5.175000000000000000e+01
6.000000000000000000e+00 5.512230769230767464e+02 3.031099548339843750e+02 6.871673583984375000e+00 0.000000000000000000e+00 0.000000000000000000e+00 3.469988281250000000e+03 4.038095474243164062e+00 1.000000000000000000e+00 1.051608886718750000e+02 1.375000000000000000e+01 5.175000000000000000e+01
5.700000000000000000e+01 5.773461538461540385e+02 3.073370666503906250e+02 6.777832031250000000e+00 0.000000000000000000e+00 0.000000000000000000e+00 3.459697265625000000e+03 4.006090164184570312e+00 4.000000000000000000e+00 8.399404144287109375e+01 1.475000000000000000e+01 5.175000000000000000e+01
3.100000000000000000e+01 5.762153846153848917e+02 2.983332824707031250e+02 6.657104492187500000e+00 0.000000000000000000e+00 0.000000000000000000e+00 3.445839599609375000e+03 3.952923774719238281e+00 3.000000000000000000e+00 6.970940399169921875e+01 1.575000000000000000e+01 5.175000000000000000e+01
2.000000000000000000e+00 5.533230769230768828e+02 2.904815673828125000e+02 6.289672851562500000e+00 0.000000000000000000e+00 0.000000000000000000e+00 3.399888427734375000e+03 3.899662971496582031e+00 1.000000000000000000e+00 1.218929901123046875e+02 1.875000000000000000e+01 5.175000000000000000e+01
4.000000000000000000e+00 5.783923076923076678e+02 3.050245056152343750e+02 5.952148437500000000e+00 0.000000000000000000e+00 2.352941185235977173e-01 3.326798095703125000e+03 3.842986822128295898e+00 1.000000000000000000e+00 1.514141693115234375e+02 2.025000000000000000e+01 5.175000000000000000e+01
1.800000000000000000e+01 6.473153846153843460e+02 3.046747436523437500e+02 5.269378662109375000e+00 0.000000000000000000e+00 0.000000000000000000e+00 3.180163818359375000e+03 3.791366577148437500e+00 1.000000000000000000e+00 1.447810363769531250e+02 2.575000000000000000e+01 5.175000000000000000e+01
2.200000000000000000e+01 6.574692307692312170e+02 3.516122436523437500e+02 5.380462646484375000e+00 0.000000000000000000e+00 1.117647051811218262e+00 3.255561767578125000e+03 3.845471858978271484e+00 3.000000000000000000e+00 1.114864273071289062e+02 2.975000000000000000e+01 5.175000000000000000e+01
5.000000000000000000e+00 6.335846153846157449e+02 3.224951477050781250e+02 4.821655273437500000e+00 0.000000000000000000e+00 1.058823585510253906e+00 3.178025390625000000e+03 3.853895187377929688e+00 1.000000000000000000e+00 1.166885604858398438e+02 3.175000000000000000e+01 5.175000000000000000e+01
8.000000000000000000e+00 6.304538461538461434e+02 3.182839965820312500e+02 4.665954589843750000e+00 0.000000000000000000e+00 7.647058963775634766e-01 3.156335937500000000e+03 3.834436416625976562e+00 1.000000000000000000e+00 1.410129089355468750e+02 3.225000000000000000e+01 5.175000000000000000e+01
9.000000000000000000e+00 5.944769230769231854e+02 3.146720886230468750e+02 4.198242187500000000e+00 0.000000000000000000e+00 1.294117689132690430e+00 3.091671386718750000e+03 3.810234546661376953e+00 1.000000000000000000e+00 1.912758331298828125e+02 3.375000000000000000e+01 5.175000000000000000e+01
6.000000000000000000e+00 5.346846153846154266e+02 3.098305969238281250e+02 3.980346679687500000e+00 0.000000000000000000e+00 1.647058844566345215e+00 3.129768066406250000e+03 3.799922227859497070e+00 1.000000000000000000e+00 1.551537628173828125e+02 3.975000000000000000e+01 5.175000000000000000e+01
7.000000000000000000e+00 4.790999999999998522e+02 2.597803955078125000e+02 3.856719970703125000e+00 0.000000000000000000e+00 1.411764740943908691e+00 3.293012451171875000e+03 3.826591730117797852e+00 1.000000000000000000e+00 1.814107055664062500e+02 4.575000000000000000e+01 5.175000000000000000e+01
1.200000000000000000e+01 4.622461538461539590e+02 2.589263305664062500e+02 3.987792968750000000e+00 0.000000000000000000e+00 2.058823585510253906e+00 3.329327148437500000e+03 3.930788516998291016e+00 1.000000000000000000e+00 1.475021839141845703e+01 4.625000000000000000e+01 5.175000000000000000e+01
1.000000000000000000e+00 4.356999999999998181e+02 2.192322082519531250e+02 4.374511718750000000e+00 0.000000000000000000e+00 2.176470518112182617e+00 3.485393310546875000e+03 3.914246797561645508e+00 1.000000000000000000e+00 6.248440170288085938e+01 4.975000000000000000e+01 5.175000000000000000e+01
1.000000000000000000e+00 4.286230769230770079e+02 2.100692596435546875e+02 4.146423339843750000e+00 0.000000000000000000e+00 2.176470518112182617e+00 3.445486328125000000e+03 3.882787942886352539e+00 1.000000000000000000e+00 7.762790679931640625e+01 5.125000000000000000e+01 5.175000000000000000e+01
1.000000000000000000e+00 4.269153846153846530e+02 2.118474731445312500e+02 4.013824462890625000e+00 0.000000000000000000e+00 2.000000000000000000e+00 3.416036621093750000e+03 3.878165960311889648e+00 1.000000000000000000e+00 1.274181442260742188e+02 5.175000000000000000e+01 5.175000000000000000e+01
1.000000000000000000e+00 4.253846153846151878e+02 2.123589935302734375e+02 3.881225585937500000e+00 0.000000000000000000e+00 1.941176414489746094e+00 3.386587158203125000e+03 3.873747587203979492e+00 1.000000000000000000e+00 9.456037139892578125e+01 5.225000000000000000e+01 5.175000000000000000e+01
5.000000000000000000e+00 3.773307692307689649e+02 2.136285400390625000e+02 2.753173828125000000e+00 0.000000000000000000e+00 1.941176414489746094e+00 3.124557128906250000e+03 3.850815773010253906e+00 1.000000000000000000e+00 1.038152084350585938e+02 5.475000000000000000e+01 5.175000000000000000e+01
1.000000000000000000e+01 3.380846153846154607e+02 2.463118591308593750e+02 1.630065917968750000e+00 0.000000000000000000e+00 1.352941155433654785e+00 2.892178955078125000e+03 3.631968021392822266e+00 1.000000000000000000e+00 4.753419494628906250e+02 5.775000000000000000e+01 5.175000000000000000e+01
1.000000000000000000e+00 3.105461538461537998e+02 1.948984375000000000e+02 1.505187988281250000e+00 0.000000000000000000e+00 1.352941155433654785e+00 2.963635986328125000e+03 3.648735284805297852e+00 1.000000000000000000e+00 3.481019592285156250e+02 6.025000000000000000e+01 5.175000000000000000e+01
0.000000000000000000e+00 2.669461538461538339e+02 1.432747497558593750e+02 2.434051513671875000e+00 0.000000000000000000e+00 1.823529362678527832e+00 3.207007324218750000e+03 3.790137052536010742e+00 1.000000000000000000e+00 1.445031433105468750e+02 6.425000000000000000e+01 5.175000000000000000e+01
0.000000000000000000e+00 2.653076923076921503e+02 1.485136566162109375e+02 2.473724365234375000e+00 0.000000000000000000e+00 2.588235378265380859e+00 3.208444335937500000e+03 3.771842241287231445e+00 1.000000000000000000e+00 1.779345245361328125e+02 6.475000000000000000e+01 5.175000000000000000e+01
0.000000000000000000e+00 2.596230769230770079e+02 1.468577270507812500e+02 2.422485351562500000e+00 0.000000000000000000e+00 1.764705896377563477e+00 3.174168701171875000e+03 3.701472520828247070e+00 1.000000000000000000e+00 2.410747680664062500e+02 6.625000000000000000e+01 5.175000000000000000e+01
1.800000000000000000e+01 1.500100000000000819e+03 5.870392456054687500e+02 1.053088378906250000e+01 0.000000000000000000e+00 0.000000000000000000e+00 4.123511718750000000e+03 4.058806419372558594e+00 1.000000000000000000e+00 5.589170837402343750e+01 -9.750000000000000000e+00 5.225000000000000000e+01
3.000000000000000000e+01 1.328723076923077087e+03 5.593217773437500000e+02 1.026748657226562500e+01 0.000000000000000000e+00 0.000000000000000000e+00 4.071599853515625000e+03 4.021115303039550781e+00 3.000000000000000000e+00 2.852739562988281250e+02 -9.250000000000000000e+00 5.225000000000000000e+01
2.800000000000000000e+01 1.094076923076922867e+03 5.323024291992187500e+02 1.016516113281250000e+01 0.000000000000000000e+00 0.000000000000000000e+00 4.044733642578125000e+03 4.029006004333496094e+00 3.000000000000000000e+00 1.303778991699218750e+02 -8.750000000000000000e+00 5.225000000000000000e+01
1.200000000000000000e+01 1.068038461538461661e+03 5.025683898925781250e+02 1.006286621093750000e+01 0.000000000000000000e+00 0.000000000000000000e+00 4.017867431640625000e+03 3.996278524398803711e+00 1.000000000000000000e+00 1.484083557128906250e+02 -8.250000000000000000e+00 5.225000000000000000e+01
4.400000000000000000e+01 1.140292307692307759e+03 4.699933166503906250e+02 9.960540771484375000e+00 0.000000000000000000e+00 0.000000000000000000e+00 3.991001220703125000e+03 3.972733259201049805e+00 3.000000000000000000e+00 1.590385284423828125e+02 -7.750000000000000000e+00 5.225000000000000000e+01
1.000000000000000000e+01 1.817484615384615381e+03 5.629441528320312500e+02 9.345855712890625000e+00 0.000000000000000000e+00 0.000000000000000000e+00 3.843739501953125000e+03 3.761771917343139648e+00 1.000000000000000000e+00 4.596254577636718750e+02 -3.750000000000000000e+00 5.225000000000000000e+01
3.700000000000000000e+01 1.187215384615384664e+03 5.526788330078125000e+02 9.356536865234375000e+00 0.000000000000000000e+00 0.000000000000000000e+00 3.848349365234375000e+03 3.757076978683471680e+00 3.000000000000000000e+00 3.738660888671875000e+02 -3.250000000000000000e+00 5.225000000000000000e+01
2.800000000000000000e+01 8.170076923076924231e+02 4.259910278320312500e+02 9.367187500000000000e+00 0.000000000000000000e+00 0.000000000000000000e+00 3.852959228515625000e+03 3.890422344207763672e+00 3.000000000000000000e+00 8.530889892578125000e+01 -2.750000000000000000e+00 5.225000000000000000e+01
4.500000000000000000e+01 8.493769230769230489e+02 4.247490234375000000e+02 8.458679199218750000e+00 0.000000000000000000e+00 0.000000000000000000e+00 3.692656738281250000e+03 3.987557649612426758e+00 4.000000000000000000e+00 3.309125518798828125e+01 5.750000000000000000e+00 5.225000000000000000e+01
1.300000000000000000e+01 8.217769230769234809e+02 4.154220581054687500e+02 8.274902343750000000e+00 0.000000000000000000e+00 0.000000000000000000e+00 3.663993652343750000e+03 3.991619825363159180e+00 1.000000000000000000e+00 7.524672985076904297e+00 6.250000000000000000e+00 5.225000000000000000e+01
6.000000000000000000e+00 7.776769230769228898e+02 3.997786254882812500e+02 7.649383544921875000e+00 0.000000000000000000e+00 0.000000000000000000e+00 3.584329589843750000e+03 3.919505357742309570e+00 1.000000000000000000e+00 8.853344726562500000e+01 8.250000000000000000e+00 5.225000000000000000e+01
3.700000000000000000e+01 5.736846153846151992e+02 3.022646484375000000e+02 7.127136230468750000e+00 0.000000000000000000e+00 0.000000000000000000e+00 3.543012451171875000e+03 4.014730930328369141e+00 3.000000000000000000e+00 6.255247497558593750e+01 1.275000000000000000e+01 5.225000000000000000e+01
8.000000000000000000e+00 5.602769230769231399e+02 2.991951904296875000e+02 7.117309570312500000e+00 0.000000000000000000e+00 0.000000000000000000e+00 3.541845458984375000e+03 4.022297382354736328e+00 1.000000000000000000e+00 3.909637069702148438e+01 1.325000000000000000e+01 5.225000000000000000e+01
4.500000000000000000e+01 5.549384615384615245e+02 2.934617004394531250e+02 7.058898925781250000e+00 0.000000000000000000e+00 0.000000000000000000e+00 3.529108642578125000e+03 4.004242420196533203e+00 4.000000000000000000e+00 5.552766418457031250e+01 1.425000000000000000e+01 5.225000000000000000e+01
4.900000000000000000e+01 5.725769230769229807e+02 2.924951171875000000e+02 7.029693603515625000e+00 0.000000000000000000e+00 0.000000000000000000e+00 3.522739990234375000e+03 3.984610319137573242e+00 4.000000000000000000e+00 5.053768157958984375e+01 1.475000000000000000e+01 5.225000000000000000e+01
1.400000000000000000e+01 5.800230769230770420e+02 3.084719238281250000e+02 6.987396240234375000e+00 0.000000000000000000e+00 2.941176593303680420e-01 3.514397216796875000e+03 3.956385374069213867e+00 1.000000000000000000e+00 1.132873992919921875e+02 1.525000000000000000e+01 5.225000000000000000e+01
4.300000000000000000e+01 5.634230769230769056e+02 3.163045654296875000e+02 6.932037353515625000e+00 0.000000000000000000e+00 0.000000000000000000e+00 3.504080078125000000e+03 3.940714120864868164e+00 3.000000000000000000e+00 7.836509704589843750e+01 1.575000000000000000e+01 5.225000000000000000e+01
1.100000000000000000e+01 5.578923076923077815e+02 3.022217102050781250e+02 6.876647949218750000e+00 0.000000000000000000e+00 2.941176593303680420e-01 3.493762939453125000e+03 3.923003435134887695e+00 1.000000000000000000e+00 9.973426818847656250e+01 1.625000000000000000e+01 5.225000000000000000e+01
3.100000000000000000e+01 5.080000000000000000e+02 2.771503295898437500e+02 5.927307128906250000e+00 0.000000000000000000e+00 0.000000000000000000e+00 3.307495849609375000e+03 3.854278564453125000e+00 3.000000000000000000e+00 1.043331375122070312e+02 2.125000000000000000e+01 5.225000000000000000e+01
3.200000000000000000e+01 5.310615384615385892e+02 2.743107299804687500e+02 5.796325683593750000e+00 0.000000000000000000e+00 0.000000000000000000e+00 3.280739013671875000e+03 3.832728147506713867e+00 3.000000000000000000e+00 1.785251159667968750e+02 2.175000000000000000e+01 5.225000000000000000e+01
8.000000000000000000e+00 5.173384615384613880e+02 2.758778076171875000e+02 5.665344238281250000e+00 0.000000000000000000e+00 0.000000000000000000e+00 3.253982421875000000e+03 3.831339120864868164e+00 1.000000000000000000e+00 1.480104980468750000e+02 2.225000000000000000e+01 5.225000000000000000e+01
3.800000000000000000e+01 5.363384615384618428e+02 2.850457153320312500e+02 5.466461181640625000e+00 0.000000000000000000e+00 0.000000000000000000e+00 3.211539794921875000e+03 3.828990459442138672e+00 3.000000000000000000e+00 1.467352294921875000e+02 2.325000000000000000e+01 5.225000000000000000e+01
1.600000000000000000e+01 6.019153846153849372e+02 3.024288635253906250e+02 5.263336181640625000e+00 0.000000000000000000e+00 6.470588445663452148e-01 3.173164794921875000e+03 3.783651113510131836e+00 1.000000000000000000e+00 1.570476989746093750e+02 2.525000000000000000e+01 5.225000000000000000e+01
5.100000000000000000e+01 6.664076923076922867e+02 3.774841613769531250e+02 5.298522949218750000e+00 0.000000000000000000e+00 8.823529481887817383e-01 3.210811035156250000e+03 3.775038003921508789e+00 4.000000000000000000e+00 1.231196365356445312e+02 2.875000000000000000e+01 5.225000000000000000e+01
3.400000000000000000e+01 6.512615384615384073e+02 3.397074584960937500e+02 4.950744628906250000e+00 0.000000000000000000e+00 8.823529481887817383e-01 3.159570800781250000e+03 3.816904306411743164e+00 3.000000000000000000e+00 1.261525497436523438e+02 3.075000000000000000e+01 5.225000000000000000e+01
1.200000000000000000e+01 5.375230769230770420e+02 2.787477416992187500e+02 3.164611816406250000e+00 0.000000000000000000e+00 3.117647171020507812e+00 3.017778320312500000e+03 3.771861076354980469e+00 1.000000000000000000e+00 1.506119384765625000e+02 4.225000000000000000e+01 5.225000000000000000e+01
8.000000000000000000e+00 5.049999999999996021e+02 2.869856262207031250e+02 3.150939941406250000e+00 0.000000000000000000e+00 3.058823585510253906e+00 3.076416503906250000e+03 3.742344617843627930e+00 1.000000000000000000e+00 2.115552673339843750e+02 4.425000000000000000e+01 5.225000000000000000e+01
6.000000000000000000e+00 5.006615384615385551e+02 2.694172058105468750e+02 3.354949951171875000e+00 0.000000000000000000e+00 2.764705896377563477e+00 3.142025878906250000e+03 3.740687131881713867e+00 1.000000000000000000e+00 1.876365203857421875e+02 4.525000000000000000e+01 5.225000000000000000e+01
1.000000000000000000e+00 5.127538461538463253e+02 2.588853454589843750e+02 3.783020019531250000e+00 0.000000000000000000e+00 1.941176414489746094e+00 3.252322753906250000e+03 3.834776401519775391e+00 1.000000000000000000e+00 1.511422729492187500e+02 4.675000000000000000e+01 5.225000000000000000e+01
2.000000000000000000e+00 4.722846153846152220e+02 2.249619140625000000e+02 4.104583740234375000e+00 0.000000000000000000e+00 2.235294103622436523e+00 3.393342773437500000e+03 3.852850675582885742e+00 1.000000000000000000e+00 1.164669799804687500e+02 5.025000000000000000e+01 5.225000000000000000e+01
2.500000000000000000e+01 3.612538461538462116e+02 3.141631469726562500e+02 1.293884277343750000e+00 0.000000000000000000e+00 2.941176593303680420e-01 2.780576660156250000e+03 3.538734912872314453e+00 3.000000000000000000e+00 5.332190551757812500e+02 5.725000000000000000e+01 5.225000000000000000e+01
3.000000000000000000e+01 3.553076923076922640e+02 2.942185974121093750e+02 1.182800292968750000e+00 0.000000000000000000e+00 0.000000000000000000e+00 2.761318603515625000e+03 3.492187738418579102e+00 3.000000000000000000e+00 5.518046264648437500e+02 5.775000000000000000e+01 5.225000000000000000e+01
1.000000000000000000e+00 3.232153846153846075e+02 1.976983947753906250e+02 1.152435302734375000e+00 0.000000000000000000e+00 1.529411792755126953e+00 2.858145507812500000e+03 3.594703674316406250e+00 1.000000000000000000e+00 3.663503112792968750e+02 6.025000000000000000e+01 5.225000000000000000e+01
1.000000000000000000e+00 3.142076923076922412e+02 1.876754150390625000e+02 1.745574951171875000e+00 0.000000000000000000e+00 3.176470518112182617e+00 3.041714843750000000e+03 3.702084064483642578e+00 1.000000000000000000e+00 2.298098449707031250e+02 6.225000000000000000e+01 5.225000000000000000e+01
1.700000000000000000e+01 1.119346153846154039e+03 4.965988769531250000e+02 9.995178222656250000e+00 0.000000000000000000e+00 0.000000000000000000e+00 3.974221191406250000e+03 4.005481243133544922e+00 1.000000000000000000e+00 5.782912063598632812e+01 -8.750000000000000000e+00 5.275000000000000000e+01
1.500000000000000000e+01 1.181253846153847007e+03 4.754757080078125000e+02 9.830291748046875000e+00 0.000000000000000000e+00 0.000000000000000000e+00 3.935826660156250000e+03 3.952982425689697266e+00 1.000000000000000000e+00 2.852669982910156250e+02 -8.250000000000000000e+00 5.275000000000000000e+01
2.700000000000000000e+01 9.801538461538459615e+02 4.473439636230468750e+02 9.665405273437500000e+00 0.000000000000000000e+00 0.000000000000000000e+00 3.897432128906250000e+03 3.947279214859008789e+00 3.000000000000000000e+00 1.198748168945312500e+02 -7.750000000000000000e+00 5.275000000000000000e+01
1.900000000000000000e+01 9.863923076923076678e+02 4.354861755371093750e+02 9.635986328125000000e+00 0.000000000000000000e+00 0.000000000000000000e+00 3.873874511718750000e+03 3.944438695907592773e+00 1.000000000000000000e+00 1.446565704345703125e+02 -7.250000000000000000e+00 5.275000000000000000e+01
3.600000000000000000e+01 1.116092307692307941e+03 4.349466552734375000e+02 9.742034912109375000e+00 0.000000000000000000e+00 0.000000000000000000e+00 3.865153808593750000e+03 3.979276180267333984e+00 3.000000000000000000e+00 7.976573944091796875e+01 -6.750000000000000000e+00 5.275000000000000000e+01
2.800000000000000000e+01 1.211838461538461615e+03 5.440444335937500000e+02 9.160827636718750000e+00 0.000000000000000000e+00 2.352941185235977173e-01 3.766403808593750000e+03 3.399543046951293945e+00 3.000000000000000000e+00 2.122481689453125000e+02 -3.250000000000000000e+00 5.275000000000000000e+01
1.300000000000000000e+01 8.700769230769237765e+02 4.215321350097656250e+02 8.568969726562500000e+00 0.000000000000000000e+00 0.000000000000000000e+00 3.668728271484375000e+03 3.930938243865966797e+00 1.000000000000000000e+00 2.851712226867675781e+00 6.250000000000000000e+00 5.275000000000000000e+01
2.800000000000000000e+01 7.864076923076925141e+02 4.189843750000000000e+02 8.396362304687500000e+00 0.000000000000000000e+00 0.000000000000000000e+00 3.641543457031250000e+03 3.913663387298583984e+00 3.000000000000000000e+00 1.267073726654052734e+01 6.750000000000000000e+00 5.275000000000000000e+01
6.000000000000000000e+00 7.518923076923076678e+02 3.686829223632812500e+02 7.728698730468750000e+00 0.000000000000000000e+00 0.000000000000000000e+00 3.586581787109375000e+03 3.915406465530395508e+00 1.000000000000000000e+00 5.096618652343750000e+01 8.750000000000000000e+00 5.275000000000000000e+01
6.200000000000000000e+01 6.861000000000001364e+02 3.701530761718750000e+02 7.471038818359375000e+00 0.000000000000000000e+00 0.000000000000000000e+00 3.574523681640625000e+03 3.906711816787719727e+00 4.000000000000000000e+00 4.051778411865234375e+01 9.750000000000000000e+00 5.275000000000000000e+01
6.200000000000000000e+01 6.869307692307688740e+02 3.570884094238281250e+02 7.399993896484375000e+00 0.000000000000000000e+00 0.000000000000000000e+00 3.567902587890625000e+03 3.893092155456542969e+00 4.000000000000000000e+00 8.298051452636718750e+01 1.025000000000000000e+01 5.275000000000000000e+01
5.800000000000000000e+01 5.895153846153846189e+02 2.842142639160156250e+02 7.182098388671875000e+00 0.000000000000000000e+00 2.941176593303680420e-01 3.479130126953125000e+03 3.944700479507446289e+00 4.000000000000000000e+00 5.734668731689453125e+01 1.475000000000000000e+01 5.275000000000000000e+01
5.400000000000000000e+01 5.920307692307688967e+02 3.114643554687500000e+02 7.094787597656250000e+00 0.000000000000000000e+00 2.352941185235977173e-01 3.476653808593750000e+03 3.911835670471191406e+00 4.000000000000000000e+00 4.359507751464843750e+01 1.575000000000000000e+01 5.275000000000000000e+01
5.700000000000000000e+01 5.790384615384614335e+02 3.045932922363281250e+02 7.033935546875000000e+00 0.000000000000000000e+00 0.000000000000000000e+00 3.482107177734375000e+03 3.888683080673217773e+00 4.000000000000000000e+00 6.899497985839843750e+01 1.625000000000000000e+01 5.275000000000000000e+01
1.300000000000000000e+01 5.712307692307691696e+02 3.016116638183593750e+02 6.973114013671875000e+00 0.000000000000000000e+00 2.941176593303680420e-01 3.487560546875000000e+03 3.867204189300537109e+00 1.000000000000000000e+00 7.112743377685546875e+01 1.675000000000000000e+01 5.275000000000000000e+01
9.000000000000000000e+00 5.670153846153846189e+02 2.884964904785156250e+02 6.452392578125000000e+00 0.000000000000000000e+00 0.000000000000000000e+00 3.391482666015625000e+03 3.842417001724243164e+00 1.000000000000000000e+00 1.245425643920898438e+02 1.975000000000000000e+01 5.275000000000000000e+01
1.600000000000000000e+01 5.499615384615383391e+02 2.880740356445312500e+02 6.319915771484375000e+00 0.000000000000000000e+00 0.000000000000000000e+00 3.363962158203125000e+03 3.838196992874145508e+00 1.000000000000000000e+00 1.000843276977539062e+02 2.025000000000000000e+01 5.275000000000000000e+01
4.200000000000000000e+01 5.321923076923078497e+02 2.491218414306640625e+02 5.863281250000000000e+00 0.000000000000000000e+00 0.000000000000000000e+00 3.277050537109375000e+03 3.807517290115356445e+00 3.000000000000000000e+00 1.162805023193359375e+02 2.175000000000000000e+01 5.275000000000000000e+01
1.100000000000000000e+01 5.539076923076922867e+02 2.816566772460937500e+02 5.565521240234375000e+00 0.000000000000000000e+00 0.000000000000000000e+00 3.221159423828125000e+03 3.757962226867675781e+00 1.000000000000000000e+00 1.349875183105468750e+02 2.275000000000000000e+01 5.275000000000000000e+01
7.200000000000000000e+01 5.568461538461536975e+02 2.979863891601562500e+02 5.327239990234375000e+00 0.000000000000000000e+00 0.000000000000000000e+00 3.174317382812500000e+03 3.768132448196411133e+00 4.000000000000000000e+00 1.645419616699218750e+02 2.375000000000000000e+01 5.275000000000000000e+01
6.600000000000000000e+01 5.938615384615387711e+02 3.074236145019531250e+02 5.151580810546875000e+00 0.000000000000000000e+00 5.882353186607360840e-01 3.143122558593750000e+03 3.759246587753295898e+00 4.000000000000000000e+00 1.878954620361328125e+02 2.475000000000000000e+01 5.275000000000000000e+01
6.900000000000000000e+01 6.388923076923078952e+02 3.347208862304687500e+02 5.046386718750000000e+00 0.000000000000000000e+00 5.294117927551269531e-01 3.140272949218750000e+03 3.750138998031616211e+00 4.000000000000000000e+00 1.542705688476562500e+02 2.675000000000000000e+01 5.275000000000000000e+01
3.100000000000000000e+01 6.398769230769232763e+02 3.480293579101562500e+02 5.048065185546875000e+00 0.000000000000000000e+00 1.058823585510253906e+00 3.145097656250000000e+03 3.756664752960205078e+00 3.000000000000000000e+00 1.451468811035156250e+02 2.725000000000000000e+01 5.275000000000000000e+01
5.800000000000000000e+01 6.483230769230766555e+02 3.598834838867187500e+02 4.935241699218750000e+00 0.000000000000000000e+00 0.000000000000000000e+00 3.134573486328125000e+03 3.729095220565795898e+00 4.000000000000000000e+00 1.446024322509765625e+02 2.925000000000000000e+01 5.275000000000000000e+01
2.500000000000000000e+01 6.433076923076922640e+02 3.509939270019531250e+02 4.784362792968750000e+00 0.000000000000000000e+00 1.117647051811218262e+00 3.110080810546875000e+03 3.744745969772338867e+00 3.000000000000000000e+00 1.408739624023437500e+02 3.025000000000000000e+01 5.275000000000000000e+01
9.000000000000000000e+00 6.507538461538460979e+02 3.450933532714843750e+02 4.636962890625000000e+00 0.000000000000000000e+00 1.176470637321472168e+00 3.086385009765625000e+03 3.747782707214355469e+00 1.000000000000000000e+00 1.419477081298828125e+02 3.075000000000000000e+01 5.275000000000000000e+01
3.000000000000000000e+01 6.545692307692307850e+02 3.437639465332031250e+02 4.489562988281250000e+00 0.000000000000000000e+00 7.647058963775634766e-01 3.062689208984375000e+03 3.741783857345581055e+00 3.000000000000000000e+00 1.477386779785156250e+02 3.125000000000000000e+01 5.275000000000000000e+01
1.300000000000000000e+01 6.140230769230767010e+02 3.312634277343750000e+02 4.054687500000000000e+00 0.000000000000000000e+00 5.294117927551269531e-01 3.001012939453125000e+03 3.734573602676391602e+00 1.000000000000000000e+00 2.083753051757812500e+02 3.275000000000000000e+01 5.275000000000000000e+01
1.300000000000000000e+01 6.089307692307694424e+02 3.395585021972656250e+02 3.760589599609375000e+00 0.000000000000000000e+00 2.941176593303680420e-01 2.967521972656250000e+03 3.708701610565185547e+00 1.000000000000000000e+00 1.811625671386718750e+02 3.425000000000000000e+01 5.275000000000000000e+01
6.000000000000000000e+00 6.482846153846155630e+02 3.522937316894531250e+02 3.743713378906250000e+00 0.000000000000000000e+00 2.176470518112182617e+00 2.984679687500000000e+03 3.637423515319824219e+00 1.000000000000000000e+00 2.340020904541015625e+02 3.625000000000000000e+01 5.275000000000000000e+01
5.000000000000000000e+00 5.476384615384615699e+02 3.100572204589843750e+02 3.467041015625000000e+00 0.000000000000000000e+00 2.117647171020507812e+00 2.989237060546875000e+03 3.723508358001708984e+00 1.000000000000000000e+00 1.167706604003906250e+02 3.975000000000000000e+01 5.275000000000000000e+01
5.000000000000000000e+01 5.300615384615385892e+02 2.708152770996093750e+02 3.173431396484375000e+00 0.000000000000000000e+00 0.000000000000000000e+00 3.081952392578125000e+03 3.727548599243164062e+00 4.000000000000000000e+00 2.309318084716796875e+02 4.575000000000000000e+01 5.275000000000000000e+01
1.000000000000000000e+00 5.267692307692307168e+02 2.635574951171875000e+02 3.418609619140625000e+00 0.000000000000000000e+00 5.882353186607360840e-01 3.147960205078125000e+03 3.755748510360717773e+00 1.000000000000000000e+00 2.679737854003906250e+02 4.675000000000000000e+01 5.275000000000000000e+01
1.000000000000000000e+00 5.047846153846154493e+02 2.486520996093750000e+02 3.752349853515625000e+00 0.000000000000000000e+00 2.470588207244873047e+00 3.286056640625000000e+03 3.804636478424072266e+00 1.000000000000000000e+00 1.045621566772460938e+02 5.025000000000000000e+01 5.275000000000000000e+01
4.900000000000000000e+01 4.193076923076922640e+02 2.991259155273437500e+02 1.095092773437500000e+00 0.000000000000000000e+00 0.000000000000000000e+00 2.705930419921875000e+03 3.548114061355590820e+00 4.000000000000000000e+00 4.092511596679687500e+02 5.675000000000000000e+01 5.275000000000000000e+01
2.300000000000000000e+01 3.978615384615383164e+02 3.139869384765625000e+02 9.949340820312500000e-01 0.000000000000000000e+00 0.000000000000000000e+00 2.688031738281250000e+03 3.218231439590454102e+00 3.000000000000000000e+00 5.444112548828125000e+02 5.725000000000000000e+01 5.275000000000000000e+01
4.300000000000000000e+01 3.906538461538462457e+02 3.025069580078125000e+02 8.947448730468750000e-01 0.000000000000000000e+00 0.000000000000000000e+00 2.670133300781250000e+03 2.282361030578613281e+00 3.000000000000000000e+00 6.894561767578125000e+02 5.775000000000000000e+01 5.275000000000000000e+01
5.000000000000000000e+00 3.615999999999999659e+02 2.312882690429687500e+02 8.348083496093750000e-01 0.000000000000000000e+00 1.470588207244873047e+00 2.687491455078125000e+03 3.491863012313842773e+00 1.000000000000000000e+00 3.505925598144531250e+02 5.875000000000000000e+01 5.275000000000000000e+01
0.000000000000000000e+00 3.416999999999998749e+02 2.047157592773437500e+02 1.099731445312500000e+00 0.000000000000000000e+00 1.705882310867309570e+00 2.824639892578125000e+03 3.594868183135986328e+00 1.000000000000000000e+00 3.003975219726562500e+02 6.075000000000000000e+01 5.275000000000000000e+01
3.000000000000000000e+00 3.403999999999999773e+02 2.075628662109375000e+02 1.256103515625000000e+00 0.000000000000000000e+00 2.588235378265380859e+00 2.875029541015625000e+03 3.640559196472167969e+00 1.000000000000000000e+00 2.595707092285156250e+02 6.125000000000000000e+01 5.275000000000000000e+01
0.000000000000000000e+00 3.317769230769230830e+02 1.827651062011718750e+02 1.549591064453125000e+00 0.000000000000000000e+00 1.764705896377563477e+00 2.961476074218750000e+03 3.660996675491333008e+00 1.000000000000000000e+00 2.140322570800781250e+02 6.225000000000000000e+01 5.275000000000000000e+01
1.900000000000000000e+01 1.129315384615385028e+03 5.049088134765625000e+02 9.957946777343750000e+00 0.000000000000000000e+00 0.000000000000000000e+00 3.926638183593750000e+03 3.978905916213989258e+00 1.000000000000000000e+00 3.108976936340332031e+01 -8.750000000000000000e+00 5.325000000000000000e+01
1.700000000000000000e+01 1.006730769230769283e+03 4.743084716796875000e+02 9.708465576171875000e+00 0.000000000000000000e+00 2.941176593303680420e-01 3.871762695312500000e+03 3.967895984649658203e+00 1.000000000000000000e+00 7.254427337646484375e+01 -8.250000000000000000e+00 5.325000000000000000e+01
2.000000000000000000e+01 9.126076923076926732e+02 4.387093200683593750e+02 9.459014892578125000e+00 0.000000000000000000e+00 2.941176593303680420e-01 3.816887207031250000e+03 3.967495679855346680e+00 3.000000000000000000e+00 4.969693374633789062e+01 -7.750000000000000000e+00 5.325000000000000000e+01
4.900000000000000000e+01 8.451769230769234582e+02 4.346825561523437500e+02 9.384613037109375000e+00 0.000000000000000000e+00 5.882352963089942932e-02 3.784670654296875000e+03 3.993619441986083984e+00 4.000000000000000000e+00 8.445209503173828125e+01 -7.250000000000000000e+00 5.325000000000000000e+01
2.400000000000000000e+01 8.535692307692308987e+02 4.214511718750000000e+02 9.485229492187500000e+00 0.000000000000000000e+00 6.470588445663452148e-01 3.775113281250000000e+03 4.000135898590087891e+00 3.000000000000000000e+00 8.253556823730468750e+01 -6.750000000000000000e+00 5.325000000000000000e+01
2.600000000000000000e+01 8.732461538461539021e+02 3.737533569335937500e+02 8.954223632812500000e+00 0.000000000000000000e+00 0.000000000000000000e+00 3.678478759765625000e+03 3.917405605316162109e+00 3.000000000000000000e+00 4.889411544799804688e+01 -2.750000000000000000e+00 5.325000000000000000e+01
4.100000000000000000e+01 9.300307692307690104e+02 3.879311523437500000e+02 8.868988037109375000e+00 0.000000000000000000e+00 0.000000000000000000e+00 3.676248535156250000e+03 3.892866134643554688e+00 3.000000000000000000e+00 1.004256134033203125e+02 -2.250000000000000000e+00 5.325000000000000000e+01
1.500000000000000000e+01 7.936076923076925596e+02 4.088987426757812500e+02 8.455200195312500000e+00 0.000000000000000000e+00 0.000000000000000000e+00 3.615568847656250000e+03 3.895603656768798828e+00 1.000000000000000000e+00 2.032770633697509766e+00 7.750000000000000000e+00 5.325000000000000000e+01
1.300000000000000000e+01 7.861769230769230035e+02 3.971711425781250000e+02 8.214721679687500000e+00 0.000000000000000000e+00 0.000000000000000000e+00 3.605195312500000000e+03 3.908948421478271484e+00 1.000000000000000000e+00 6.108917713165283203e+00 8.250000000000000000e+00 5.325000000000000000e+01
2.200000000000000000e+01 7.748384615384612744e+02 3.839235839843750000e+02 7.974243164062500000e+00 0.000000000000000000e+00 0.000000000000000000e+00 3.594821777343750000e+03 3.902718782424926758e+00 3.000000000000000000e+00 3.214426040649414062e+01 8.750000000000000000e+00 5.325000000000000000e+01
6.000000000000000000e+00 7.683384615384616154e+02 3.858094177246093750e+02 7.733764648437500000e+00 0.000000000000000000e+00 0.000000000000000000e+00 3.584448486328125000e+03 3.884891510009765625e+00 1.000000000000000000e+00 3.198430252075195312e+01 9.250000000000000000e+00 5.325000000000000000e+01
4.500000000000000000e+01 7.494384615384611834e+02 3.877566528320312500e+02 7.535217285156250000e+00 0.000000000000000000e+00 0.000000000000000000e+00 3.569017822265625000e+03 3.862834453582763672e+00 4.000000000000000000e+00 3.415734481811523438e+01 1.025000000000000000e+01 5.325000000000000000e+01
6.700000000000000000e+01 6.326307692307691468e+02 2.918916625976562500e+02 7.144744873046875000e+00 0.000000000000000000e+00 0.000000000000000000e+00 3.521306152343750000e+03 3.886592626571655273e+00 4.000000000000000000e+00 8.588518524169921875e+01 1.325000000000000000e+01 5.325000000000000000e+01
1.200000000000000000e+01 6.133076923076926050e+02 2.892361145019531250e+02 7.247985839843750000e+00 0.000000000000000000e+00 2.941176593303680420e-01 3.439159423828125000e+03 3.900362968444824219e+00 1.000000000000000000e+00 3.468247985839843750e+01 1.425000000000000000e+01 5.325000000000000000e+01
6.100000000000000000e+01 6.441000000000001364e+02 3.297604675292968750e+02 7.218139648437500000e+00 0.000000000000000000e+00 0.000000000000000000e+00 3.419158935546875000e+03 3.832928180694580078e+00 4.000000000000000000e+00 9.375706481933593750e+01 1.575000000000000000e+01 5.325000000000000000e+01
1.300000000000000000e+01 6.455692307692305576e+02 3.065604553222656250e+02 7.146606445312500000e+00 0.000000000000000000e+00 0.000000000000000000e+00 3.446898681640625000e+03 3.794337749481201172e+00 1.000000000000000000e+00 1.419586029052734375e+02 1.625000000000000000e+01 5.325000000000000000e+01
5.000000000000000000e+01 6.218538461538461206e+02 2.959784240722656250e+02 7.075103759765625000e+00 0.000000000000000000e+00 0.000000000000000000e+00 3.474638427734375000e+03 3.788025379180908203e+00 4.000000000000000000e+00 8.940802001953125000e+01 1.675000000000000000e+01 5.325000000000000000e+01
4.700000000000000000e+01 5.888769230769229353e+02 3.017730102539062500e+02 6.580505371093750000e+00 0.000000000000000000e+00 2.941176593303680420e-01 3.388679687500000000e+03 3.792589187622070312e+00 4.000000000000000000e+00 1.498281555175781250e+02 1.975000000000000000e+01 5.325000000000000000e+01
7.000000000000000000e+01 6.119846153846156085e+02 2.935842895507812500e+02 6.270233154296875000e+00 0.000000000000000000e+00 0.000000000000000000e+00 3.327090576171875000e+03 3.737046480178833008e+00 4.000000000000000000e+00 1.529029388427734375e+02 2.075000000000000000e+01 5.325000000000000000e+01
1.000000000000000000e+01 6.037692307692309441e+02 2.625046997070312500e+02 6.082702636718750000e+00 0.000000000000000000e+00 0.000000000000000000e+00 3.294816162109375000e+03 3.747459888458251953e+00 1.000000000000000000e+00 1.128262786865234375e+02 2.125000000000000000e+01 5.325000000000000000e+01
5.400000000000000000e+01 5.929461538461537202e+02 2.434438171386718750e+02 5.895202636718750000e+00 0.000000000000000000e+00 0.000000000000000000e+00 3.262541992187500000e+03 3.730072736740112305e+00 4.000000000000000000e+00 1.064559097290039062e+02 2.175000000000000000e+01 5.325000000000000000e+01
6.600000000000000000e+01 5.833230769230772239e+02 3.004593200683593750e+02 5.384063720703125000e+00 0.000000000000000000e+00 0.000000000000000000e+00 3.172735839843750000e+03 3.685292243957519531e+00 4.000000000000000000e+00 1.549164886474609375e+02 2.325000000000000000e+01 5.325000000000000000e+01
6.000000000000000000e+01 6.231923076923072813e+02 3.339983215332031250e+02 4.911346435546875000e+00 0.000000000000000000e+00 0.000000000000000000e+00 3.096161621093750000e+03 3.700659513473510742e+00 4.000000000000000000e+00 1.392625122070312500e+02 2.525000000000000000e+01 5.325000000000000000e+01
1.000000000000000000e+01 6.609692307692311033e+02 3.462694091796875000e+02 4.672210693359375000e+00 0.000000000000000000e+00 6.470588445663452148e-01 3.077266357421875000e+03 3.690112829208374023e+00 1.000000000000000000e+00 1.590470275878906250e+02 2.825000000000000000e+01 5.325000000000000000e+01
5.100000000000000000e+01 6.640230769230771557e+02 3.464854736328125000e+02 4.617004394531250000e+00 0.000000000000000000e+00 5.294117927551269531e-01 3.067396728515625000e+03 3.677327871322631836e+00 4.000000000000000000e+00 1.609231262207031250e+02 2.875000000000000000e+01 5.325000000000000000e+01
3.800000000000000000e+01 6.338692307692302847e+02 3.482651672363281250e+02 3.767333984375000000e+00 0.000000000000000000e+00 1.058823585510253906e+00 2.934540527343750000e+03 3.665247917175292969e+00 3.000000000000000000e+00 1.630017395019531250e+02 3.275000000000000000e+01 5.325000000000000000e+01
5.600000000000000000e+01 6.125692307692308987e+02 3.536684875488281250e+02 3.649810791015625000e+00 0.000000000000000000e+00 5.294117927551269531e-01 2.920185791015625000e+03 3.668327808380126953e+00 4.000000000000000000e+00 1.877492675781250000e+02 3.325000000000000000e+01 5.325000000000000000e+01
6.600000000000000000e+01 6.370692307692307850e+02 3.688994140625000000e+02 3.535003662109375000e+00 0.000000000000000000e+00 0.000000000000000000e+00 2.915649658203125000e+03 3.661386728286743164e+00 4.000000000000000000e+00 1.859166107177734375e+02 3.475000000000000000e+01 5.325000000000000000e+01
3.100000000000000000e+01 6.627307692307695106e+02 3.614760742187500000e+02 3.536346435546875000e+00 0.000000000000000000e+00 1.117647051811218262e+00 2.920559082031250000e+03 3.648758411407470703e+00 3.000000000000000000e+00 2.160863952636718750e+02 3.525000000000000000e+01 5.325000000000000000e+01
1.000000000000000000e+01 6.569076923076925141e+02 3.462450256347656250e+02 3.597473144531250000e+00 0.000000000000000000e+00 1.823529362678527832e+00 2.955261474609375000e+03 3.633157253265380859e+00 1.000000000000000000e+00 2.467086181640625000e+02 3.725000000000000000e+01 5.325000000000000000e+01
5.000000000000000000e+00 6.009999999999998863e+02 2.934063110351562500e+02 3.113372802734375000e+00 0.000000000000000000e+00 2.176470518112182617e+00 2.933345947265625000e+03 3.693484544754028320e+00 1.000000000000000000e+00 1.065011291503906250e+02 4.175000000000000000e+01 5.325000000000000000e+01
1.100000000000000000e+01 5.533769230769231626e+02 2.788102416992187500e+02 2.727874755859375000e+00 0.000000000000000000e+00 2.176470518112182617e+00 2.943043457031250000e+03 3.673732995986938477e+00 1.000000000000000000e+00 2.341117248535156250e+02 4.475000000000000000e+01 5.325000000000000000e+01
4.100000000000000000e+01 5.463076923076921503e+02 2.746150207519531250e+02 2.861480712890625000e+00 0.000000000000000000e+00 8.235294222831726074e-01 2.991214111328125000e+03 3.695677042007446289e+00 3.000000000000000000e+00 2.465385131835937500e+02 4.575000000000000000e+01 5.325000000000000000e+01
8.000000000000000000e+00 5.470000000000000000e+02 2.678033752441406250e+02 3.044219970703125000e+00 0.000000000000000000e+00 2.352941185235977173e-01 3.046741455078125000e+03 3.679567575454711914e+00 1.000000000000000000e+00 2.658196105957031250e+02 4.675000000000000000e+01 5.325000000000000000e+01
1.700000000000000000e+01 5.046076923076922185e+02 2.602526245117187500e+02 3.189910888671875000e+00 0.000000000000000000e+00 5.882353186607360840e-01 3.103159912109375000e+03 3.719974994659423828e+00 1.000000000000000000e+00 2.432266235351562500e+02 4.775000000000000000e+01 5.325000000000000000e+01
1.000000000000000000e+01 4.721538461538460751e+02 2.590119323730468750e+02 3.260101318359375000e+00 0.000000000000000000e+00 1.411764740943908691e+00 3.131432861328125000e+03 3.752725362777709961e+00 1.000000000000000000e+00 1.636934204101562500e+02 4.825000000000000000e+01 5.325000000000000000e+01
6.000000000000000000e+01 4.743307692307692491e+02 2.558286590576171875e+02 3.349273681640625000e+00 0.000000000000000000e+00 5.294117927551269531e-01 3.168436523437500000e+03 3.758138895034790039e+00 4.000000000000000000e+00 1.837728576660156250e+02 4.975000000000000000e+01 5.325000000000000000e+01
8.000000000000000000e+00 4.959000000000000341e+02 2.907587280273437500e+02 1.459747314453125000e+00 0.000000000000000000e+00 1.176470592617988586e-01 2.746314453125000000e+03 3.619144439697265625e+00 1.000000000000000000e+00 3.079637756347656250e+02 5.525000000000000000e+01 5.325000000000000000e+01
4.100000000000000000e+01 4.885615384615384187e+02 2.966775512695312500e+02 9.343261718750000000e-01 0.000000000000000000e+00 4.705882370471954346e-01 2.645240478515625000e+03 3.593512535095214844e+00 3.000000000000000000e+00 2.837250976562500000e+02 5.625000000000000000e+01 5.325000000000000000e+01
5.000000000000000000e+01 4.646538461538459615e+02 3.029967041015625000e+02 8.437194824218750000e-01 0.000000000000000000e+00 0.000000000000000000e+00 2.627784912109375000e+03 3.481635332107543945e+00 4.000000000000000000e+00 5.470896606445312500e+02 5.675000000000000000e+01 5.325000000000000000e+01
6.000000000000000000e+01 4.411769230769231172e+02 3.013580932617187500e+02 7.531433105468750000e-01 0.000000000000000000e+00 0.000000000000000000e+00 2.610329345703125000e+03 3.378556966781616211e+00 4.000000000000000000e+00 6.980343627929687500e+02 5.725000000000000000e+01 5.325000000000000000e+01
1.800000000000000000e+01 4.258769230769233332e+02 2.813196411132812500e+02 6.625671386718750000e-01 0.000000000000000000e+00 0.000000000000000000e+00 2.592873779296875000e+03 3.319484949111938477e+00 1.000000000000000000e+00 4.676397094726562500e+02 5.775000000000000000e+01 5.325000000000000000e+01
2.600000000000000000e+01 4.184769230769231285e+02 2.486660766601562500e+02 6.022033691406250000e-01 0.000000000000000000e+00 0.000000000000000000e+00 2.586023681640625000e+03 3.308620691299438477e+00 3.000000000000000000e+00 6.478937988281250000e+02 5.825000000000000000e+01 5.325000000000000000e+01
2.000000000000000000e+00 4.011384615384617405e+02 2.224001464843750000e+02 6.325378417968750000e-01 0.000000000000000000e+00 5.294117927551269531e-01 2.610990234375000000e+03 3.383525848388671875e+00 1.000000000000000000e+00 3.832819213867187500e+02 5.875000000000000000e+01 5.325000000000000000e+01
3.000000000000000000e+00 3.538615384615384301e+02 1.930435485839843750e+02 1.242828369140625000e+00 0.000000000000000000e+00 8.823529481887817383e-01 2.845105712890625000e+03 3.629739046096801758e+00 1.000000000000000000e+00 2.273863983154296875e+02 6.175000000000000000e+01 5.325000000000000000e+01
1.100000000000000000e+01 3.391307692307692605e+02 1.806306304931640625e+02 1.738922119140625000e+00 0.000000000000000000e+00 1.823529362678527832e+00 2.974257324218750000e+03 3.642190217971801758e+00 1.000000000000000000e+00 1.473574676513671875e+02 6.375000000000000000e+01 5.325000000000000000e+01
2.600000000000000000e+01 3.363923076923075541e+02 1.778815917968750000e+02 1.718444824218750000e+00 0.000000000000000000e+00 1.882352948188781738e+00 2.971709472656250000e+03 3.640568733215332031e+00 3.000000000000000000e+00 1.932831420898437500e+02 6.425000000000000000e+01 5.325000000000000000e+01
4.500000000000000000e+01 1.305369230769230626e+03 5.520584716796875000e+02 1.025476074218750000e+01 0.000000000000000000e+00 0.000000000000000000e+00 3.950411865234375000e+03 3.887936592102050781e+00 4.000000000000000000e+00 2.634228134155273438e+01 -9.250000000000000000e+00 5.375000000000000000e+01
3.100000000000000000e+01 1.187923076923076678e+03 5.522806396484375000e+02 9.920715332031250000e+00 0.000000000000000000e+00 0.000000000000000000e+00 3.879055175781250000e+03 3.905271530151367188e+00 3.000000000000000000e+00 8.864769744873046875e+01 -8.750000000000000000e+00 5.375000000000000000e+01
1.600000000000000000e+01 1.081392307692307895e+03 5.294121093750000000e+02 9.586669921875000000e+00 0.000000000000000000e+00 0.000000000000000000e+00 3.807698730468750000e+03 3.904171943664550781e+00 1.000000000000000000e+00 7.935924530029296875e+01 -8.250000000000000000e+00 5.375000000000000000e+01
2.800000000000000000e+01 1.056684615384615427e+03 4.861311950683593750e+02 9.252624511718750000e+00 0.000000000000000000e+00 5.882352963089942932e-02 3.736342041015625000e+03 3.915934324264526367e+00 3.000000000000000000e+00 7.008406829833984375e+01 -7.750000000000000000e+00 5.375000000000000000e+01
3.300000000000000000e+01 9.484769230769229580e+02 4.644215393066406250e+02 9.133209228515625000e+00 0.000000000000000000e+00 0.000000000000000000e+00 3.695466796875000000e+03 3.943793058395385742e+00 3.000000000000000000e+00 1.112119064331054688e+02 -7.250000000000000000e+00 5.375000000000000000e+01
1.500000000000000000e+01 9.061230769230771784e+02 4.419143981933593750e+02 9.228424072265625000e+00 0.000000000000000000e+00 0.000000000000000000e+00 3.685072998046875000e+03 3.983710050582885742e+00 1.000000000000000000e+00 6.125280761718750000e+01 -6.750000000000000000e+00 5.375000000000000000e+01
4.500000000000000000e+01 1.315246153846153447e+03 4.754005126953125000e+02 8.632263183593750000e+00 0.000000000000000000e+00 0.000000000000000000e+00 3.581673095703125000e+03 2.752565145492553711e+00 4.000000000000000000e+00 2.822624511718750000e+02 -2.250000000000000000e+00 5.375000000000000000e+01
5.700000000000000000e+01 6.761769230769233445e+02 3.273171081542968750e+02 7.392303466796875000e+00 0.000000000000000000e+00 0.000000000000000000e+00 3.543558349609375000e+03 3.872887849807739258e+00 4.000000000000000000e+00 3.487480926513671875e+01 1.175000000000000000e+01 5.375000000000000000e+01
2.000000000000000000e+00 6.597999999999997272e+02 3.630587768554687500e+02 7.423736572265625000e+00 0.000000000000000000e+00 0.000000000000000000e+00 3.311638183593750000e+03 3.829682588577270508e+00 1.000000000000000000e+00 4.215376663208007812e+01 1.525000000000000000e+01 5.375000000000000000e+01
3.200000000000000000e+01 7.108538461538460069e+02 3.225245056152343750e+02 7.259277343750000000e+00 0.000000000000000000e+00 0.000000000000000000e+00 3.411690429687500000e+03 3.729543924331665039e+00 3.000000000000000000e+00 1.276448516845703125e+02 1.625000000000000000e+01 5.375000000000000000e+01
1.200000000000000000e+01 6.699461538461538339e+02 3.124024047851562500e+02 7.134338378906250000e+00 0.000000000000000000e+00 5.882352963089942932e-02 3.470011962890625000e+03 3.688004732131958008e+00 1.000000000000000000e+00 1.454570617675781250e+02 1.725000000000000000e+01 5.375000000000000000e+01
3.000000000000000000e+01 6.481000000000002501e+02 3.392144470214843750e+02 7.104766845703125000e+00 0.000000000000000000e+00 0.000000000000000000e+00 3.464397460937500000e+03 3.694859266281127930e+00 3.000000000000000000e+00 1.343954620361328125e+02 1.775000000000000000e+01 5.375000000000000000e+01
6.100000000000000000e+01 6.042461538461540158e+02 3.366767578125000000e+02 7.075195312500000000e+00 0.000000000000000000e+00 0.000000000000000000e+00 3.458782714843750000e+03 3.729347467422485352e+00 4.000000000000000000e+00 1.153340759277343750e+02 1.825000000000000000e+01 5.375000000000000000e+01
1.200000000000000000e+01 5.881923076923075087e+02 3.274455261230468750e+02 7.045654296875000000e+00 0.000000000000000000e+00 8.823529481887817383e-01 3.453168212890625000e+03 3.765263319015502930e+00 1.000000000000000000e+00 6.453976440429687500e+01 1.875000000000000000e+01 5.375000000000000000e+01
1.400000000000000000e+01 6.399153846153845961e+02 2.995876464843750000e+02 5.710845947265625000e+00 0.000000000000000000e+00 0.000000000000000000e+00 3.212938476562500000e+03 3.663280010223388672e+00 1.000000000000000000e+00 1.564359283447265625e+02 2.225000000000000000e+01 5.375000000000000000e+01
1.100000000000000000e+01 6.065384615384614335e+02 3.010580139160156250e+02 5.509033203125000000e+00 0.000000000000000000e+00 2.352941185235977173e-01 3.179505126953125000e+03 3.660172224044799805e+00 1.000000000000000000e+00 1.282435913085937500e+02 2.275000000000000000e+01 5.375000000000000000e+01
5.200000000000000000e+01 6.636692307692306940e+02 3.628575744628906250e+02 4.596099853515625000e+00 0.000000000000000000e+00 5.294117927551269531e-01 3.037765625000000000e+03 3.657273530960083008e+00 4.000000000000000000e+00 1.782870788574218750e+02 2.575000000000000000e+01 5.375000000000000000e+01
6.300000000000000000e+01 6.586461538461542204e+02 3.625422973632812500e+02 4.441619873046875000e+00 0.000000000000000000e+00 2.352941185235977173e-01 3.019013427734375000e+03 3.657915830612182617e+00 4.000000000000000000e+00 2.120632781982421875e+02 2.675000000000000000e+01 5.375000000000000000e+01
5.900000000000000000e+01 6.611846153846150855e+02 3.567310485839843750e+02 4.247314453125000000e+00 0.000000000000000000e+00 5.882353186607360840e-01 2.991790283203125000e+03 3.645540237426757812e+00 4.000000000000000000e+00 1.765756225585937500e+02 2.875000000000000000e+01 5.375000000000000000e+01
3.700000000000000000e+01 6.520384615384614335e+02 3.496652526855468750e+02 4.188323974609375000e+00 0.000000000000000000e+00 0.000000000000000000e+00 2.980480957031250000e+03 3.633775472640991211e+00 3.000000000000000000e+00 1.671456451416015625e+02 2.925000000000000000e+01 5.375000000000000000e+01
5.400000000000000000e+01 6.462000000000000455e+02 3.468914489746093750e+02 4.129333496093750000e+00 0.000000000000000000e+00 5.294117927551269531e-01 2.969171630859375000e+03 3.623683929443359375e+00 4.000000000000000000e+00 1.733882751464843750e+02 2.975000000000000000e+01 5.375000000000000000e+01
1.500000000000000000e+01 6.295000000000001137e+02 3.536636657714843750e+02 3.916168212890625000e+00 0.000000000000000000e+00 8.823529481887817383e-01 2.932611816406250000e+03 3.608178377151489258e+00 1.000000000000000000e+00 1.623833618164062500e+02 3.075000000000000000e+01 5.375000000000000000e+01
4.800000000000000000e+01 6.398000000000002956e+02 3.532390441894531250e+02 3.793701171875000000e+00 0.000000000000000000e+00 4.705882370471954346e-01 2.912008300781250000e+03 3.610376596450805664e+00 4.000000000000000000e+00 1.781728363037109375e+02 3.125000000000000000e+01 5.375000000000000000e+01
1.300000000000000000e+01 6.547538461538460979e+02 3.526211547851562500e+02 3.671234130859375000e+00 0.000000000000000000e+00 1.000000000000000000e+00 2.891405029296875000e+03 3.612360954284667969e+00 1.000000000000000000e+00 1.524963531494140625e+02 3.175000000000000000e+01 5.375000000000000000e+01
6.700000000000000000e+01 6.425538461538460524e+02 3.522259216308593750e+02 3.479949951171875000e+00 0.000000000000000000e+00 5.294117927551269531e-01 2.868068359375000000e+03 3.606814146041870117e+00 4.000000000000000000e+00 1.946869812011718750e+02 3.275000000000000000e+01 5.375000000000000000e+01
1.600000000000000000e+01 6.583615384615385437e+02 3.591873474121093750e+02 3.388122558593750000e+00 0.000000000000000000e+00 7.647058963775634766e-01 2.857676513671875000e+03 3.605206251144409180e+00 1.000000000000000000e+00 1.931282348632812500e+02 3.325000000000000000e+01 5.375000000000000000e+01
9.000000000000000000e+00 6.502384615384617064e+02 3.710079345703125000e+02 3.296325683593750000e+00 0.000000000000000000e+00 1.235294103622436523e+00 2.847284667968750000e+03 3.615271091461181641e+00 1.000000000000000000e+00 1.714780273437500000e+02 3.375000000000000000e+01 5.375000000000000000e+01
6.800000000000000000e+01 6.505769230769233218e+02 3.791465759277343750e+02 3.306701660156250000e+00 0.000000000000000000e+00 8.235294222831726074e-01 2.853958251953125000e+03 3.621253967285156250e+00 4.000000000000000000e+00 1.892832183837890625e+02 3.425000000000000000e+01 5.375000000000000000e+01
5.500000000000000000e+01 6.563230769230769965e+02 3.730465698242187500e+02 3.317108154296875000e+00 0.000000000000000000e+00 5.294117927551269531e-01 2.860631591796875000e+03 3.624489784240722656e+00 4.000000000000000000e+00 1.902006378173828125e+02 3.475000000000000000e+01 5.375000000000000000e+01
1.600000000000000000e+01 6.681461538461536520e+02 3.610839843750000000e+02 3.327484130859375000e+00 0.000000000000000000e+00 0.000000000000000000e+00 2.867305175781250000e+03 3.623652219772338867e+00 1.000000000000000000e+00 1.757378540039062500e+02 3.525000000000000000e+01 5.375000000000000000e+01
6.200000000000000000e+01 6.639230769230764508e+02 3.545002441406250000e+02 3.343688964843750000e+00 0.000000000000000000e+00 5.882353186607360840e-01 2.875381103515625000e+03 3.621279478073120117e+00 4.000000000000000000e+00 2.175940399169921875e+02 3.575000000000000000e+01 5.375000000000000000e+01
5.000000000000000000e+01 6.145461538461539703e+02 3.162456054687500000e+02 2.938537597656250000e+00 0.000000000000000000e+00 0.000000000000000000e+00 2.882572753906250000e+03 3.663319587707519531e+00 4.000000000000000000e+00 1.477017517089843750e+02 4.225000000000000000e+01 5.375000000000000000e+01
6.000000000000000000e+00 5.852230769230768601e+02 3.097384338378906250e+02 2.620422363281250000e+00 0.000000000000000000e+00 2.000000000000000000e+00 2.860991699218750000e+03 3.642803192138671875e+00 1.000000000000000000e+00 1.457628326416015625e+02 4.375000000000000000e+01 5.375000000000000000e+01
5.100000000000000000e+01 5.504769230769227306e+02 2.670532226562500000e+02 2.609649658203125000e+00 0.000000000000000000e+00 5.882353186607360840e-01 2.922999267578125000e+03 3.655123472213745117e+00 4.000000000000000000e+00 2.283115539550781250e+02 4.625000000000000000e+01 5.375000000000000000e+01
3.000000000000000000e+01 5.266999999999998181e+02 2.577000122070312500e+02 2.726196289062500000e+00 0.000000000000000000e+00 1.705882310867309570e+00 2.969254882812500000e+03 3.660778999328613281e+00 3.000000000000000000e+00 2.345110778808593750e+02 4.725000000000000000e+01 5.375000000000000000e+01
1.000000000000000000e+01 4.827538461538461547e+02 2.579754333496093750e+02 2.836425781250000000e+00 0.000000000000000000e+00 1.294117689132690430e+00 3.017525146484375000e+03 3.688825607299804688e+00 1.000000000000000000e+00 1.959526367187500000e+02 4.825000000000000000e+01 5.375000000000000000e+01
5.900000000000000000e+01 5.107846153846153925e+02 3.234014587402343750e+02 5.923767089843750000e-01 0.000000000000000000e+00 0.000000000000000000e+00 2.549639648437500000e+03 3.446463346481323242e+00 4.000000000000000000e+00 4.962461242675781250e+02 5.675000000000000000e+01 5.375000000000000000e+01
5.000000000000000000e+01 4.876538461538460183e+02 3.112016296386718750e+02 5.113830566406250000e-01 0.000000000000000000e+00 0.000000000000000000e+00 2.532626953125000000e+03 3.321893215179443359e+00 4.000000000000000000e+00 4.943657226562500000e+02 5.725000000000000000e+01 5.375000000000000000e+01
5.800000000000000000e+01 4.708461538461538680e+02 2.833054199218750000e+02 4.303894042968750000e-01 9.999999776482582092e-03 0.000000000000000000e+00 2.515614257812500000e+03 3.260492324829101562e+00 4.000000000000000000e+00 7.470801391601562500e+02 5.775000000000000000e+01 5.375000000000000000e+01
1.700000000000000000e+01 4.633692307692306258e+02 2.484966888427734375e+02 3.817749023437500000e-01 0.000000000000000000e+00 5.882353186607360840e-01 2.509181640625000000e+03 2.100548267364501953e+00 1.000000000000000000e+00 5.972934570312500000e+02 5.825000000000000000e+01 5.375000000000000000e+01
2.000000000000000000e+01 4.372307692307691696e+02 2.244204864501953125e+02 4.302368164062500000e-01 0.000000000000000000e+00 5.882353186607360840e-01 2.534489013671875000e+03 3.221236705780029297e+00 3.000000000000000000e+00 4.723541564941406250e+02 5.875000000000000000e+01 5.375000000000000000e+01
1.700000000000000000e+01 4.170846153846154039e+02 2.096586761474609375e+02 6.259765625000000000e-01 0.000000000000000000e+00 1.588235259056091309e+00 2.621619873046875000e+03 3.482532024383544922e+00 1.000000000000000000e+00 3.902423706054687500e+02 6.025000000000000000e+01 5.375000000000000000e+01
5.000000000000000000e+00 3.809846153846153811e+02 2.048425445556640625e+02 9.240722656250000000e-01 0.000000000000000000e+00 2.176470518112182617e+00 2.717068115234375000e+03 3.570419788360595703e+00 1.000000000000000000e+00 2.401904754638671875e+02 6.125000000000000000e+01 5.375000000000000000e+01
1.000000000000000000e+00 3.712769230769232536e+02 2.016012420654296875e+02 1.073120117187500000e+00 0.000000000000000000e+00 2.176470518112182617e+00 2.764792236328125000e+03 3.594515800476074219e+00 1.000000000000000000e+00 2.186956634521484375e+02 6.175000000000000000e+01 5.375000000000000000e+01
1.000000000000000000e+00 3.635538461538459956e+02 1.826876831054687500e+02 1.536285400390625000e+00 0.000000000000000000e+00 2.823529481887817383e+00 2.893200683593750000e+03 3.602374792098999023e+00 1.000000000000000000e+00 1.133337020874023438e+02 6.375000000000000000e+01 5.375000000000000000e+01
4.900000000000000000e+01 1.404938461538461979e+03 5.418453369140625000e+02 9.464843750000000000e+00 0.000000000000000000e+00 0.000000000000000000e+00 3.743634521484375000e+03 3.781735181808471680e+00 4.000000000000000000e+00 1.117234802246093750e+02 -8.250000000000000000e+00 5.425000000000000000e+01
2.400000000000000000e+01 1.482699999999999591e+03 5.054436645507812500e+02 9.046203613281250000e+00 0.000000000000000000e+00 0.000000000000000000e+00 3.655797119140625000e+03 3.756015300750732422e+00 3.000000000000000000e+00 1.935438232421875000e+02 -7.750000000000000000e+00 5.425000000000000000e+01
4.200000000000000000e+01 1.144561538461538703e+03 4.832436523437500000e+02 8.881805419921875000e+00 0.000000000000000000e+00 2.941176593303680420e-01 3.606262939453125000e+03 3.787927865982055664e+00 3.000000000000000000e+00 1.377482147216796875e+02 -7.250000000000000000e+00 5.425000000000000000e+01
2.500000000000000000e+01 9.848615384615385437e+02 4.714107055664062500e+02 8.971618652343750000e+00 0.000000000000000000e+00 0.000000000000000000e+00 3.595032470703125000e+03 3.825759649276733398e+00 3.000000000000000000e+00 1.488451232910156250e+02 -6.750000000000000000e+00 5.425000000000000000e+01
3.500000000000000000e+01 1.875153846153847098e+03 5.291780395507812500e+02 8.596191406250000000e+00 0.000000000000000000e+00 0.000000000000000000e+00 3.498208984375000000e+03 3.683986663818359375e+00 3.000000000000000000e+00 5.423452758789062500e+01 -2.750000000000000000e+00 5.425000000000000000e+01
1.800000000000000000e+01 1.779384615384614563e+03 5.004105529785156250e+02 8.395568847656250000e+00 0.000000000000000000e+00 0.000000000000000000e+00 3.487097900390625000e+03 3.576379776000976562e+00 1.000000000000000000e+00 4.248168640136718750e+02 -2.250000000000000000e+00 5.425000000000000000e+01
2.400000000000000000e+01 1.115523076923077269e+03 4.171396484375000000e+02 8.336120605468750000e+00 0.000000000000000000e+00 0.000000000000000000e+00 3.491070800781250000e+03 3.624395132064819336e+00 3.000000000000000000e+00 2.131101379394531250e+02 -1.750000000000000000e+00 5.425000000000000000e+01
2.900000000000000000e+01 8.523307692307694197e+02 3.473954467773437500e+02 8.700256347656250000e+00 0.000000000000000000e+00 0.000000000000000000e+00 3.540295654296875000e+03 3.709341287612915039e+00 3.000000000000000000e+00 1.714871368408203125e+02 -1.250000000000000000e+00 5.425000000000000000e+01
9.000000000000000000e+00 8.440461538461538566e+02 4.188523864746093750e+02 8.070953369140625000e+00 0.000000000000000000e+00 0.000000000000000000e+00 3.591529541015625000e+03 3.810800790786743164e+00 1.000000000000000000e+00 4.779125213623046875e+00 9.250000000000000000e+00 5.425000000000000000e+01
1.000000000000000000e+01 8.127076923076926960e+02 4.172742309570312500e+02 7.900909423828125000e+00 0.000000000000000000e+00 0.000000000000000000e+00 3.580012939453125000e+03 3.806523799896240234e+00 1.000000000000000000e+00 8.244142532348632812e+00 9.750000000000000000e+00 5.425000000000000000e+01
5.000000000000000000e+01 7.166384615384613426e+02 3.405837402343750000e+02 7.279052734375000000e+00 0.000000000000000000e+00 0.000000000000000000e+00 3.448794433593750000e+03 3.694028139114379883e+00 4.000000000000000000e+00 5.451557540893554688e+01 1.675000000000000000e+01 5.425000000000000000e+01
7.000000000000000000e+00 7.050923076923079407e+02 3.338743286132812500e+02 7.246612548828125000e+00 0.000000000000000000e+00 6.470588445663452148e-01 3.464796142578125000e+03 3.653674602508544922e+00 1.000000000000000000e+00 9.517235565185546875e+01 1.725000000000000000e+01 5.425000000000000000e+01
5.100000000000000000e+01 6.734153846153848235e+02 3.456265869140625000e+02 7.222045898437500000e+00 0.000000000000000000e+00 0.000000000000000000e+00 3.459259033203125000e+03 3.643289566040039062e+00 4.000000000000000000e+00 2.210347442626953125e+02 1.825000000000000000e+01 5.425000000000000000e+01
1.500000000000000000e+01 6.526076923076924459e+02 3.420073547363281250e+02 4.650177001953125000e+00 0.000000000000000000e+00 2.352941185235977173e-01 3.027066894531250000e+03 3.615926504135131836e+00 1.000000000000000000e+00 1.592752380371093750e+02 2.475000000000000000e+01 5.425000000000000000e+01
4.600000000000000000e+01 6.748692307692310806e+02 3.703934020996093750e+02 4.353973388671875000e+00 0.000000000000000000e+00 0.000000000000000000e+00 2.987645019531250000e+03 3.611026525497436523e+00 4.000000000000000000e+00 2.106660156250000000e+02 2.575000000000000000e+01 5.425000000000000000e+01
4.700000000000000000e+01 6.750846153846154039e+02 3.741574707031250000e+02 4.205841064453125000e+00 0.000000000000000000e+00 0.000000000000000000e+00 2.967934326171875000e+03 3.601129293441772461e+00 4.000000000000000000e+00 1.980012817382812500e+02 2.625000000000000000e+01 5.425000000000000000e+01
5.400000000000000000e+01 6.649000000000000909e+02 3.845429687500000000e+02 4.072631835937500000e+00 0.000000000000000000e+00 3.529411852359771729e-01 2.948833251953125000e+03 3.608011960983276367e+00 4.000000000000000000e+00 1.886023712158203125e+02 2.725000000000000000e+01 5.425000000000000000e+01
2.700000000000000000e+01 6.699923076923076906e+02 3.791590576171875000e+02 3.940368652343750000e+00 0.000000000000000000e+00 5.294117927551269531e-01 2.928932861328125000e+03 3.617522954940795898e+00 3.000000000000000000e+00 1.696168060302734375e+02 2.825000000000000000e+01 5.425000000000000000e+01
5.700000000000000000e+01 6.720923076923075996e+02 3.600657348632812500e+02 3.814880371093750000e+00 0.000000000000000000e+00 7.058823704719543457e-01 2.903434570312500000e+03 3.603086233139038086e+00 4.000000000000000000e+00 1.895676116943359375e+02 2.925000000000000000e+01 5.425000000000000000e+01
4.000000000000000000e+00 6.286846153846155403e+02 3.588727111816406250e+02 3.445770263671875000e+00 0.000000000000000000e+00 1.647058844566345215e+00 2.836667968750000000e+03 3.561713933944702148e+00 1.000000000000000000e+00 1.975856323242187500e+02 3.125000000000000000e+01 5.425000000000000000e+01
5.300000000000000000e+01 6.613461538461536975e+02 3.666033325195312500e+02 3.335754394531250000e+00 0.000000000000000000e+00 5.882353186607360840e-01 2.817610595703125000e+03 3.563978433609008789e+00 4.000000000000000000e+00 1.905593872070312500e+02 3.175000000000000000e+01 5.425000000000000000e+01
1.400000000000000000e+01 6.724230769230766782e+02 3.613224792480468750e+02 3.192565917968750000e+00 0.000000000000000000e+00 1.058823585510253906e+00 2.801596191406250000e+03 3.562600612640380859e+00 1.000000000000000000e+00 2.036539764404296875e+02 3.275000000000000000e+01 5.425000000000000000e+01
2.000000000000000000e+01 6.798615384615380890e+02 3.536388854980468750e+02 3.242584228515625000e+00 0.000000000000000000e+00 2.941176593303680420e-01 2.854178710937500000e+03 3.584259271621704102e+00 3.000000000000000000e+00 2.449007568359375000e+02 3.675000000000000000e+01 5.425000000000000000e+01
1.600000000000000000e+01 6.444153846153845961e+02 3.470938415527343750e+02 3.324371337890625000e+00 0.000000000000000000e+00 4.705882370471954346e-01 2.880436523437500000e+03 3.597013473510742188e+00 1.000000000000000000e+00 2.015514678955078125e+02 3.775000000000000000e+01 5.425000000000000000e+01
3.600000000000000000e+01 6.109076923076925141e+02 3.229287719726562500e+02 3.174682617187500000e+00 0.000000000000000000e+00 8.235294222831726074e-01 2.875743896484375000e+03 3.620387554168701172e+00 3.000000000000000000e+00 1.534916839599609375e+02 4.125000000000000000e+01 5.425000000000000000e+01
5.000000000000000000e+00 6.130923076923077133e+02 3.286268310546875000e+02 3.035156250000000000e+00 0.000000000000000000e+00 2.705882310867309570e+00 2.859720458984375000e+03 3.622913360595703125e+00 1.000000000000000000e+00 1.346581268310546875e+02 4.175000000000000000e+01 5.425000000000000000e+01
2.800000000000000000e+01 6.136000000000001364e+02 3.295885009765625000e+02 2.895660400390625000e+00 0.000000000000000000e+00 1.294117689132690430e+00 2.843696777343750000e+03 3.629751205444335938e+00 3.000000000000000000e+00 1.491205139160156250e+02 4.225000000000000000e+01 5.425000000000000000e+01
5.000000000000000000e+01 6.135230769230767010e+02 3.286161193847656250e+02 2.756134033203125000e+00 0.000000000000000000e+00 8.235294222831726074e-01 2.827673339843750000e+03 3.583345890045166016e+00 4.000000000000000000e+00 1.219635314941406250e+02 4.275000000000000000e+01 5.425000000000000000e+01
4.200000000000000000e+01 5.828230769230768828e+02 3.100152893066406250e+02 2.377075195312500000e+00 0.000000000000000000e+00 1.058823585510253906e+00 2.796550048828125000e+03 3.630816221237182617e+00 3.000000000000000000e+00 1.956409606933593750e+02 4.425000000000000000e+01 5.425000000000000000e+01
7.000000000000000000e+00 5.485846153846151765e+02 2.531233825683593750e+02 2.266479492187500000e+00 0.000000000000000000e+00 2.000000000000000000e+00 2.827020996093750000e+03 3.637402534484863281e+00 1.000000000000000000e+00 1.582119598388671875e+02 4.625000000000000000e+01 5.425000000000000000e+01
1.400000000000000000e+01 5.207769230769231399e+02 2.465632324218750000e+02 2.332672119140625000e+00 0.000000000000000000e+00 1.764705896377563477e+00 2.863622802734375000e+03 3.654938936233520508e+00 1.000000000000000000e+00 1.795870971679687500e+02 4.725000000000000000e+01 5.425000000000000000e+01
1.100000000000000000e+01 5.189615384615387939e+02 2.546116180419921875e+02 2.531951904296875000e+00 0.000000000000000000e+00 1.941176414489746094e+00 2.938733642578125000e+03 3.684598207473754883e+00 1.000000000000000000e+00 6.129279708862304688e+01 4.975000000000000000e+01 5.425000000000000000e+01
3.000000000000000000e+00 5.478230769230769965e+02 2.581915283203125000e+02 2.569732666015625000e+00 0.000000000000000000e+00 2.882352828979492188e+00 2.944715820312500000e+03 3.662284612655639648e+00 1.000000000000000000e+00 1.464378204345703125e+02 5.075000000000000000e+01 5.425000000000000000e+01
8.000000000000000000e+00 5.544307692307689877e+02 2.816074218750000000e+02 1.348876953125000000e+00 0.000000000000000000e+00 0.000000000000000000e+00 2.652738281250000000e+03 3.548085927963256836e+00 1.000000000000000000e+00 3.506892089843750000e+02 5.425000000000000000e+01 5.425000000000000000e+01
3.000000000000000000e+00 5.516230769230771784e+02 3.206644592285156250e+02 8.821411132812500000e-01 0.000000000000000000e+00 1.588235259056091309e+00 2.568632568359375000e+03 3.601085901260375977e+00 1.000000000000000000e+00 1.878253326416015625e+02 5.525000000000000000e+01 5.425000000000000000e+01
4.000000000000000000e+00 5.223230769230772239e+02 3.350401000976562500e+02 4.124145507812500000e-01 0.000000000000000000e+00 5.294117927551269531e-01 2.488064208984375000e+03 3.596793889999389648e+00 1.000000000000000000e+00 2.200720672607421875e+02 5.625000000000000000e+01 5.425000000000000000e+01
5.900000000000000000e+01 5.033384615384617859e+02 3.343856506347656250e+02 3.410034179687500000e-01 0.000000000000000000e+00 0.000000000000000000e+00 2.471494384765625000e+03 3.514649629592895508e+00 4.000000000000000000e+00 1.873532104492187500e+02 5.675000000000000000e+01 5.425000000000000000e+01
5.400000000000000000e+01 5.058692307692307395e+02 3.242535095214843750e+02 2.696228027343750000e-01 0.000000000000000000e+00 0.000000000000000000e+00 2.454924560546875000e+03 3.371355772018432617e+00 4.000000000000000000e+00 4.551225280761718750e+02 5.725000000000000000e+01 5.425000000000000000e+01
6.400000000000000000e+01 5.023538461538463480e+02 3.002672119140625000e+02 1.982116699218750000e-01 0.000000000000000000e+00 0.000000000000000000e+00 2.438354736328125000e+03 3.213618278503417969e+00 4.000000000000000000e+00 5.725483398437500000e+02 5.775000000000000000e+01 5.425000000000000000e+01
4.000000000000000000e+01 5.099461538461538339e+02 2.634300842285156250e+02 1.613159179687500000e-01 9.999999776482582092e-03 0.000000000000000000e+00 2.432339355468750000e+03 1.236236214637756348e+00 3.000000000000000000e+00 9.241929321289062500e+02 5.825000000000000000e+01 5.425000000000000000e+01
2.300000000000000000e+01 4.921307692307692605e+02 2.331593170166015625e+02 2.279663085937500000e-01 0.000000000000000000e+00 0.000000000000000000e+00 2.457987792968750000e+03 1.818484187126159668e+00 3.000000000000000000e+00 6.018411865234375000e+02 5.875000000000000000e+01 5.425000000000000000e+01
1.700000000000000000e+01 4.799538461538462002e+02 2.123859252929687500e+02 2.946472167968750000e-01 0.000000000000000000e+00 0.000000000000000000e+00 2.483636230468750000e+03 3.246522426605224609e+00 1.000000000000000000e+00 5.306268920898437500e+02 5.925000000000000000e+01 5.425000000000000000e+01
1.200000000000000000e+01 4.560307692307693515e+02 2.141702423095703125e+02 4.673156738281250000e-01 0.000000000000000000e+00 1.058823585510253906e+00 2.545304443359375000e+03 3.434138059616088867e+00 1.000000000000000000e+00 3.531076354980468750e+02 6.025000000000000000e+01 5.425000000000000000e+01
1.000000000000000000e+00 3.952615384615382936e+02 2.053731384277343750e+02 9.034423828125000000e-01 0.000000000000000000e+00 1.294117689132690430e+00 2.684478759765625000e+03 3.549756526947021484e+00 1.000000000000000000e+00 2.112865295410156250e+02 6.175000000000000000e+01 5.425000000000000000e+01
1.000000000000000000e+00 3.659153846153845393e+02 1.681106567382812500e+02 1.240234375000000000e+00 0.000000000000000000e+00 1.823529362678527832e+00 2.805082519531250000e+03 3.578419923782348633e+00 1.000000000000000000e+00 9.714221954345703125e+01 6.475000000000000000e+01 5.425000000000000000e+01
1.000000000000000000e+00 3.456692307692306940e+02 1.730307312011718750e+02 9.880065917968750000e-01 0.000000000000000000e+00 2.588235378265380859e+00 2.771482910156250000e+03 3.535060882568359375e+00 1.000000000000000000e+00 1.593827056884765625e+02 6.625000000000000000e+01 5.425000000000000000e+01
4.000000000000000000e+01 1.497192307692307622e+03 5.133814086914062500e+02 9.103118896484375000e+00 0.000000000000000000e+00 0.000000000000000000e+00 3.624030517578125000e+03 3.696174621582031250e+00 3.000000000000000000e+00 1.382286376953125000e+02 -7.750000000000000000e+00 5.475000000000000000e+01
9.000000000000000000e+00 1.406023076923077042e+03 5.145739746093750000e+02 8.898742675781250000e+00 0.000000000000000000e+00 0.000000000000000000e+00 3.567285644531250000e+03 3.714941501617431641e+00 1.000000000000000000e+00 1.627336730957031250e+02 -7.250000000000000000e+00 5.475000000000000000e+01
2.300000000000000000e+01 1.134292307692307531e+03 5.071299133300781250e+02 8.863250732421875000e+00 0.000000000000000000e+00 0.000000000000000000e+00 3.537861572265625000e+03 3.745534658432006836e+00 3.000000000000000000e+00 2.638041076660156250e+02 -6.750000000000000000e+00 5.475000000000000000e+01
3.400000000000000000e+01 9.561230769230770647e+02 4.634954223632812500e+02 8.827758789062500000e+00 0.000000000000000000e+00 0.000000000000000000e+00 3.508437500000000000e+03 3.370313882827758789e+00 3.000000000000000000e+00 4.978313064575195312e+01 -6.250000000000000000e+00 5.475000000000000000e+01
1.400000000000000000e+01 8.062615384615385210e+02 3.968814086914062500e+02 8.439727783203125000e+00 0.000000000000000000e+00 0.000000000000000000e+00 3.459102294921875000e+03 3.682224512100219727e+00 1.000000000000000000e+00 2.331972503662109375e+02 -1.750000000000000000e+00 5.475000000000000000e+01
5.100000000000000000e+01 6.865615384615381345e+02 3.636099243164062500e+02 4.255920410156250000e+00 0.000000000000000000e+00 5.882352963089942932e-02 2.947291503906250000e+03 3.574336051940917969e+00 4.000000000000000000e+00 2.385556335449218750e+02 2.575000000000000000e+01 5.475000000000000000e+01
6.000000000000000000e+01 6.567153846153846644e+02 3.764593505859375000e+02 4.093658447265625000e+00 0.000000000000000000e+00 5.882353186607360840e-01 2.929077880859375000e+03 3.583071470260620117e+00 4.000000000000000000e+00 1.418205871582031250e+02 2.625000000000000000e+01 5.475000000000000000e+01
4.500000000000000000e+01 6.470461538461536293e+02 3.798005981445312500e+02 3.949523925781250000e+00 0.000000000000000000e+00 5.882352963089942932e-02 2.911906005859375000e+03 3.580635070800781250e+00 4.000000000000000000e+00 1.854293060302734375e+02 2.725000000000000000e+01 5.475000000000000000e+01
5.400000000000000000e+01 6.825384615384616609e+02 3.804526367187500000e+02 3.806365966796875000e+00 0.000000000000000000e+00 0.000000000000000000e+00 2.893498291015625000e+03 3.579331398010253906e+00 4.000000000000000000e+00 1.738347320556640625e+02 2.825000000000000000e+01 5.475000000000000000e+01
9.000000000000000000e+00 6.987461538461537884e+02 3.795850524902343750e+02 3.738159179687500000e+00 0.000000000000000000e+00 2.941176593303680420e-01 2.879968994140625000e+03 3.578430652618408203e+00 1.000000000000000000e+00 1.633684844970703125e+02 2.875000000000000000e+01 5.475000000000000000e+01
1.000000000000000000e+01 6.937692307692306031e+02 3.766817321777343750e+02 3.669982910156250000e+00 0.000000000000000000e+00 5.882353186607360840e-01 2.866439941406250000e+03 3.571383237838745117e+00 1.000000000000000000e+00 1.488314056396484375e+02 2.925000000000000000e+01 5.475000000000000000e+01
6.300000000000000000e+01 6.720153846153846189e+02 3.651177673339843750e+02 3.513153076171875000e+00 0.000000000000000000e+00 2.352941185235977173e-01 2.835896728515625000e+03 3.540621042251586914e+00 4.000000000000000000e+00 1.798642272949218750e+02 3.025000000000000000e+01 5.475000000000000000e+01
6.600000000000000000e+01 6.545000000000001137e+02 3.649504394531250000e+02 3.404144287109375000e+00 0.000000000000000000e+00 7.647058963775634766e-01 2.815398437500000000e+03 3.531507015228271484e+00 4.000000000000000000e+00 1.775166168212890625e+02 3.075000000000000000e+01 5.475000000000000000e+01
2.400000000000000000e+01 6.491769230769230035e+02 3.764528198242187500e+02 3.295104980468750000e+00 0.000000000000000000e+00 1.588235259056091309e+00 2.794899902343750000e+03 3.528286695480346680e+00 3.000000000000000000e+00 1.725399780273437500e+02 3.125000000000000000e+01 5.475000000000000000e+01
3.100000000000000000e+01 6.908923076923078952e+02 3.970405273437500000e+02 3.100311279296875000e+00 0.000000000000000000e+00 2.941176593303680420e-01 2.762466552734375000e+03 3.525275945663452148e+00 3.000000000000000000e+00 1.806007995605468750e+02 3.225000000000000000e+01 5.475000000000000000e+01
6.300000000000000000e+01 7.023538461538463480e+02 3.879289550781250000e+02 3.022308349609375000e+00 0.000000000000000000e+00 8.235294222831726074e-01 2.753385986328125000e+03 3.516386032104492188e+00 4.000000000000000000e+00 2.113416595458984375e+02 3.275000000000000000e+01 5.475000000000000000e+01
1.900000000000000000e+01 7.287538461538458705e+02 3.725628356933593750e+02 2.944305419921875000e+00 0.000000000000000000e+00 0.000000000000000000e+00 2.744305664062500000e+03 3.502635955810546875e+00 1.000000000000000000e+00 2.440444335937500000e+02 3.325000000000000000e+01 5.475000000000000000e+01
7.000000000000000000e+01 7.284000000000000909e+02 3.631805725097656250e+02 2.866302490234375000e+00 0.000000000000000000e+00 4.705882370471954346e-01 2.735225097656250000e+03 3.500573396682739258e+00 4.000000000000000000e+00 2.139884033203125000e+02 3.375000000000000000e+01 5.475000000000000000e+01
3.200000000000000000e+01 7.307153846153843233e+02 3.570527343750000000e+02 2.874328613281250000e+00 0.000000000000000000e+00 5.882352963089942932e-02 2.741655029296875000e+03 2.472105503082275391e+00 3.000000000000000000e+00 1.879976196289062500e+02 3.425000000000000000e+01 5.475000000000000000e+01
4.800000000000000000e+01 7.301692307692309214e+02 3.552312316894531250e+02 2.882385253906250000e+00 0.000000000000000000e+00 5.294117927551269531e-01 2.748084960937500000e+03 2.648486375808715820e+00 4.000000000000000000e+00 2.106355743408203125e+02 3.475000000000000000e+01 5.475000000000000000e+01
2.000000000000000000e+01 7.054307692307695561e+02 3.562069396972656250e+02 2.908294677734375000e+00 0.000000000000000000e+00 0.000000000000000000e+00 2.763075683593750000e+03 3.539563655853271484e+00 3.000000000000000000e+00 1.610595245361328125e+02 3.575000000000000000e+01 5.475000000000000000e+01
4.300000000000000000e+01 6.982384615384612516e+02 3.613152465820312500e+02 3.003051757812500000e+00 0.000000000000000000e+00 2.941176593303680420e-01 2.792983642578125000e+03 3.572579145431518555e+00 3.000000000000000000e+00 2.174003295898437500e+02 3.675000000000000000e+01 5.475000000000000000e+01
2.100000000000000000e+01 5.831076923076921048e+02 3.255428771972656250e+02 3.200897216796875000e+00 0.000000000000000000e+00 1.176470637321472168e+00 2.852970458984375000e+03 3.583631515502929688e+00 3.000000000000000000e+00 9.630001831054687500e+01 3.975000000000000000e+01 5.475000000000000000e+01
2.600000000000000000e+01 5.764846153846151537e+02 3.270700073242187500e+02 3.160858154296875000e+00 0.000000000000000000e+00 1.235294103622436523e+00 2.848013916015625000e+03 3.595187902450561523e+00 3.000000000000000000e+00 1.139644927978515625e+02 4.025000000000000000e+01 5.475000000000000000e+01
6.000000000000000000e+01 5.914307692307692150e+02 3.310405578613281250e+02 3.120788574218750000e+00 0.000000000000000000e+00 5.882353186607360840e-01 2.843057373046875000e+03 3.598292589187622070e+00 4.000000000000000000e+00 1.014631347656250000e+02 4.075000000000000000e+01 5.475000000000000000e+01
6.600000000000000000e+01 6.086615384615383846e+02 3.367554321289062500e+02 3.080718994140625000e+00 0.000000000000000000e+00 2.352941185235977173e-01 2.838100830078125000e+03 3.595026731491088867e+00 4.000000000000000000e+00 1.317751159667968750e+02 4.125000000000000000e+01 5.475000000000000000e+01
4.500000000000000000e+01 6.217769230769231399e+02 3.409930725097656250e+02 2.949035644531250000e+00 0.000000000000000000e+00 1.176470637321472168e+00 2.822739501953125000e+03 3.596689462661743164e+00 4.000000000000000000e+00 9.356835937500000000e+01 4.175000000000000000e+01 5.475000000000000000e+01
6.400000000000000000e+01 6.295307692307692378e+02 3.323093872070312500e+02 2.553039550781250000e+00 0.000000000000000000e+00 5.294117927551269531e-01 2.777747802734375000e+03 3.514018058776855469e+00 4.000000000000000000e+00 1.335058898925781250e+02 4.325000000000000000e+01 5.475000000000000000e+01
1.300000000000000000e+01 6.226230769230769511e+02 3.270808410644531250e+02 2.417449951171875000e+00 0.000000000000000000e+00 2.352941185235977173e-01 2.766757324218750000e+03 3.591250896453857422e+00 1.000000000000000000e+00 1.526714324951171875e+02 4.375000000000000000e+01 5.475000000000000000e+01
5.700000000000000000e+01 6.065846153846152902e+02 3.214105529785156250e+02 2.281860351562500000e+00 0.000000000000000000e+00 0.000000000000000000e+00 2.755767089843750000e+03 3.595456600189208984e+00 4.000000000000000000e+00 1.715942840576171875e+02 4.425000000000000000e+01 5.475000000000000000e+01
2.800000000000000000e+01 5.786923076923078497e+02 2.980239257812500000e+02 2.076660156250000000e+00 0.000000000000000000e+00 5.294117927551269531e-01 2.744862060546875000e+03 3.606433153152465820e+00 3.000000000000000000e+00 1.235726089477539062e+02 4.525000000000000000e+01 5.475000000000000000e+01
3.300000000000000000e+01 5.407538461538462116e+02 2.360399017333984375e+02 2.065826416015625000e+00 0.000000000000000000e+00 1.529411792755126953e+00 2.778343261718750000e+03 3.612675666809082031e+00 3.000000000000000000e+00 9.698178863525390625e+01 4.675000000000000000e+01 5.475000000000000000e+01
5.400000000000000000e+01 5.333384615384615017e+02 2.398001556396484375e+02 2.080902099609375000e+00 0.000000000000000000e+00 0.000000000000000000e+00 2.792757324218750000e+03 3.614760875701904297e+00 4.000000000000000000e+00 1.748006439208984375e+02 4.725000000000000000e+01 5.475000000000000000e+01
3.000000000000000000e+00 5.328999999999999773e+02 2.560421752929687500e+02 2.123474121093750000e+00 0.000000000000000000e+00 2.352941274642944336e+00 2.823754150390625000e+03 3.624109983444213867e+00 1.000000000000000000e+00 8.328344726562500000e+01 4.825000000000000000e+01 5.475000000000000000e+01
1.200000000000000000e+01 5.486692307692308077e+02 2.630267944335937500e+02 2.206512451171875000e+00 0.000000000000000000e+00 1.529411792755126953e+00 2.851082031250000000e+03 3.631812334060668945e+00 1.000000000000000000e+00 1.617150878906250000e+02 4.975000000000000000e+01 5.475000000000000000e+01
3.800000000000000000e+01 5.538230769230768828e+02 2.650092773437500000e+02 2.237365722656250000e+00 0.000000000000000000e+00 1.470588207244873047e+00 2.856996582031250000e+03 3.621408224105834961e+00 3.000000000000000000e+00 1.510335845947265625e+02 5.025000000000000000e+01 5.475000000000000000e+01
7.000000000000000000e+00 5.540615384615383618e+02 2.690157165527343750e+02 2.236846923828125000e+00 0.000000000000000000e+00 8.235294222831726074e-01 2.855136962890625000e+03 3.617745161056518555e+00 1.000000000000000000e+00 1.202289581298828125e+02 5.075000000000000000e+01 5.475000000000000000e+01
2.800000000000000000e+01 5.555384615384616609e+02 2.751479187011718750e+02 2.047454833984375000e+00 0.000000000000000000e+00 1.058823585510253906e+00 2.804771484375000000e+03 3.581621646881103516e+00 3.000000000000000000e+00 1.204642791748046875e+02 5.175000000000000000e+01 5.475000000000000000e+01
5.000000000000000000e+00 5.587846153846151083e+02 2.866580200195312500e+02 1.026184082031250000e+00 0.000000000000000000e+00 1.941176414489746094e+00 2.558835449218750000e+03 3.555248737335205078e+00 1.000000000000000000e+00 1.337062835693359375e+02 5.475000000000000000e+01 5.475000000000000000e+01
9.000000000000000000e+00 5.500999999999999091e+02 3.304317016601562500e+02 5.989379882812500000e-01 0.000000000000000000e+00 5.294117927551269531e-01 2.484772949218750000e+03 3.573733568191528320e+00 1.000000000000000000e+00 1.860463714599609375e+02 5.575000000000000000e+01 5.475000000000000000e+01
9.000000000000000000e+00 5.281769230769231172e+02 3.318008422851562500e+02 3.085327148437500000e-01 0.000000000000000000e+00 0.000000000000000000e+00 2.432072021484375000e+03 2.625128984451293945e+00 1.000000000000000000e+00 1.213464660644531250e+02 5.675000000000000000e+01 5.475000000000000000e+01
6.200000000000000000e+01 5.305384615384614335e+02 3.219046936035156250e+02 2.317504882812500000e-01 0.000000000000000000e+00 0.000000000000000000e+00 2.416402343750000000e+03 2.717149734497070312e+00 4.000000000000000000e+00 3.026665649414062500e+02 5.725000000000000000e+01 5.475000000000000000e+01
5.500000000000000000e+01 5.368461538461541522e+02 3.048652038574218750e+02 1.549987792968750000e-01 0.000000000000000000e+00 5.882352963089942932e-02 2.400732666015625000e+03 3.243438243865966797e+00 4.000000000000000000e+00 5.757077636718750000e+02 5.775000000000000000e+01 5.475000000000000000e+01
1.200000000000000000e+01 5.351461538461539931e+02 2.758383483886718750e+02 1.110534667968750000e-01 0.000000000000000000e+00 0.000000000000000000e+00 2.394608398437500000e+03 3.147150039672851562e+00 1.000000000000000000e+00 5.026582946777343750e+02 5.825000000000000000e+01 5.475000000000000000e+01
5.200000000000000000e+01 5.457384615384614790e+02 2.480297546386718750e+02 1.657104492187500000e-01 0.000000000000000000e+00 0.000000000000000000e+00 2.417120849609375000e+03 2.910738468170166016e+00 4.000000000000000000e+00 4.825999755859375000e+02 5.875000000000000000e+01 5.475000000000000000e+01
5.900000000000000000e+01 5.395461538461538566e+02 2.324608917236328125e+02 2.203674316406250000e-01 9.999999776482582092e-03 0.000000000000000000e+00 2.439633056640625000e+03 1.475996613502502441e+00 4.000000000000000000e+00 7.660699462890625000e+02 5.925000000000000000e+01 5.475000000000000000e+01
2.300000000000000000e+01 4.958230769230767123e+02 2.249004821777343750e+02 3.704528808593750000e-01 0.000000000000000000e+00 9.411764740943908691e-01 2.494997070312500000e+03 3.363482713699340820e+00 3.000000000000000000e+00 3.755346374511718750e+02 6.025000000000000000e+01 5.475000000000000000e+01
1.100000000000000000e+01 4.632615384615380663e+02 2.190840606689453125e+02 5.067138671875000000e-01 0.000000000000000000e+00 1.235294103622436523e+00 2.538188232421875000e+03 3.445446252822875977e+00 1.000000000000000000e+00 2.791838378906250000e+02 6.075000000000000000e+01 5.475000000000000000e+01
9.000000000000000000e+00 4.240923076923078838e+02 2.109542999267578125e+02 7.792358398437500000e-01 0.000000000000000000e+00 1.235294103622436523e+00 2.624570556640625000e+03 3.511337280273437500e+00 1.000000000000000000e+00 2.232300567626953125e+02 6.175000000000000000e+01 5.475000000000000000e+01
7.000000000000000000e+00 3.892461538461539021e+02 1.709424438476562500e+02 1.094055175781250000e+00 0.000000000000000000e+00 2.941176593303680420e-01 2.743579101562500000e+03 3.537842512130737305e+00 1.000000000000000000e+00 1.188794784545898438e+02 6.475000000000000000e+01 5.475000000000000000e+01
1.000000000000000000e+00 3.415076923076924231e+02 1.718326873779296875e+02 5.145263671875000000e-01 0.000000000000000000e+00 1.235294103622436523e+00 2.668677001953125000e+03 3.472283124923706055e+00 1.000000000000000000e+00 1.353287658691406250e+02 6.775000000000000000e+01 5.475000000000000000e+01
6.100000000000000000e+01 2.074053846153845370e+03 4.954952697753906250e+02 8.241821289062500000e+00 0.000000000000000000e+00 0.000000000000000000e+00 3.341447998046875000e+03 3.552855253219604492e+00 4.000000000000000000e+00 3.598972473144531250e+02 -4.250000000000000000e+00 5.525000000000000000e+01
4.200000000000000000e+01 1.589030769230768783e+03 5.290864257812500000e+02 8.190124511718750000e+00 0.000000000000000000e+00 0.000000000000000000e+00 3.329941650390625000e+03 3.473333120346069336e+00 3.000000000000000000e+00 1.438796844482421875e+02 -3.750000000000000000e+00 5.525000000000000000e+01
6.800000000000000000e+01 1.710415384615384710e+03 5.724664916992187500e+02 8.273345947265625000e+00 0.000000000000000000e+00 0.000000000000000000e+00 3.353709228515625000e+03 3.048322677612304688e+00 4.000000000000000000e+00 2.592976684570312500e+02 -3.250000000000000000e+00 5.525000000000000000e+01
7.000000000000000000e+00 1.367607692307691877e+03 5.341276855468750000e+02 8.356567382812500000e+00 0.000000000000000000e+00 0.000000000000000000e+00 3.377476562500000000e+03 3.520092010498046875e+00 1.000000000000000000e+00 2.201969451904296875e+02 -2.750000000000000000e+00 5.525000000000000000e+01
6.000000000000000000e+00 1.091500000000000000e+03 4.706420898437500000e+02 8.439758300781250000e+00 0.000000000000000000e+00 0.000000000000000000e+00 3.401244140625000000e+03 3.543042659759521484e+00 1.000000000000000000e+00 2.229749298095703125e+02 -2.250000000000000000e+00 5.525000000000000000e+01
7.000000000000000000e+00 6.853615384615384301e+02 3.536744079589843750e+02 5.184204101562500000e+00 0.000000000000000000e+00 0.000000000000000000e+00 3.019926757812500000e+03 3.606799364089965820e+00 1.000000000000000000e+00 9.382572174072265625e+01 2.325000000000000000e+01 5.525000000000000000e+01
3.000000000000000000e+01 6.502923076923076451e+02 3.506043090820312500e+02 4.946289062500000000e+00 0.000000000000000000e+00 3.529411852359771729e-01 2.989808105468750000e+03 3.611504316329956055e+00 3.000000000000000000e+00 6.439479827880859375e+01 2.375000000000000000e+01 5.525000000000000000e+01
1.600000000000000000e+01 6.674923076923073495e+02 3.630993652343750000e+02 4.343261718750000000e+00 0.000000000000000000e+00 0.000000000000000000e+00 2.923844238281250000e+03 3.558758258819580078e+00 1.000000000000000000e+00 1.406550750732421875e+02 2.525000000000000000e+01 5.525000000000000000e+01
6.500000000000000000e+01 6.735461538461544251e+02 3.701480712890625000e+02 4.168579101562500000e+00 0.000000000000000000e+00 0.000000000000000000e+00 2.907664062500000000e+03 3.536764621734619141e+00 4.000000000000000000e+00 1.615840606689453125e+02 2.575000000000000000e+01 5.525000000000000000e+01
2.300000000000000000e+01 6.619769230769228443e+02 3.771283569335937500e+02 3.993896484375000000e+00 0.000000000000000000e+00 0.000000000000000000e+00 2.891483642578125000e+03 3.531931400299072266e+00 3.000000000000000000e+00 2.016312255859375000e+02 2.625000000000000000e+01 5.525000000000000000e+01
5.000000000000000000e+01 6.344230769230766782e+02 3.749845581054687500e+02 3.917663574218750000e+00 0.000000000000000000e+00 2.941176593303680420e-01 2.884290283203125000e+03 3.529350757598876953e+00 4.000000000000000000e+00 1.377855529785156250e+02 2.675000000000000000e+01 5.525000000000000000e+01
4.400000000000000000e+01 6.437076923076923549e+02 3.637221069335937500e+02 3.841430664062500000e+00 0.000000000000000000e+00 7.647058963775634766e-01 2.877096923828125000e+03 3.524102210998535156e+00 3.000000000000000000e+00 1.298874206542968750e+02 2.725000000000000000e+01 5.525000000000000000e+01
1.400000000000000000e+01 6.599999999999998863e+02 3.622183837890625000e+02 3.765197753906250000e+00 0.000000000000000000e+00 5.294117927551269531e-01 2.869903320312500000e+03 3.521082162857055664e+00 1.000000000000000000e+00 1.624280242919921875e+02 2.775000000000000000e+01 5.525000000000000000e+01
7.000000000000000000e+00 7.060923076923077133e+02 3.863401184082031250e+02 3.542053222656250000e+00 0.000000000000000000e+00 2.941176593303680420e-01 2.832422607421875000e+03 3.530169010162353516e+00 1.000000000000000000e+00 1.315515747070312500e+02 2.925000000000000000e+01 5.525000000000000000e+01
8.000000000000000000e+00 6.799769230769231854e+02 3.931300964355468750e+02 3.268035888671875000e+00 0.000000000000000000e+00 2.941176593303680420e-01 2.777789550781250000e+03 3.495934009552001953e+00 1.000000000000000000e+00 1.761976776123046875e+02 3.075000000000000000e+01 5.525000000000000000e+01
1.100000000000000000e+01 6.721461538461536520e+02 3.941267700195312500e+02 3.159118652343750000e+00 0.000000000000000000e+00 8.235294222831726074e-01 2.755627929687500000e+03 3.493680477142333984e+00 1.000000000000000000e+00 1.807061004638671875e+02 3.125000000000000000e+01 5.525000000000000000e+01
4.100000000000000000e+01 6.773846153846156994e+02 3.991033935546875000e+02 3.050170898437500000e+00 0.000000000000000000e+00 4.705882370471954346e-01 2.733466064453125000e+03 3.484784126281738281e+00 3.000000000000000000e+00 1.747436828613281250e+02 3.175000000000000000e+01 5.525000000000000000e+01
3.400000000000000000e+01 7.202923076923077588e+02 3.990824584960937500e+02 2.953430175781250000e+00 0.000000000000000000e+00 0.000000000000000000e+00 2.718757568359375000e+03 3.464520454406738281e+00 3.000000000000000000e+00 2.466404113769531250e+02 3.225000000000000000e+01 5.525000000000000000e+01
5.100000000000000000e+01 7.151000000000005912e+02 3.873136901855468750e+02 2.860778808593750000e+00 0.000000000000000000e+00 0.000000000000000000e+00 2.706533691406250000e+03 3.460058689117431641e+00 4.000000000000000000e+00 2.232366333007812500e+02 3.275000000000000000e+01 5.525000000000000000e+01
5.100000000000000000e+01 7.315384615384612061e+02 3.577953796386718750e+02 2.675415039062500000e+00 0.000000000000000000e+00 3.529411852359771729e-01 2.682085693359375000e+03 3.465804815292358398e+00 4.000000000000000000e+00 2.460158233642578125e+02 3.375000000000000000e+01 5.525000000000000000e+01
5.400000000000000000e+01 7.365153846153843915e+02 3.534889221191406250e+02 2.665618896484375000e+00 0.000000000000000000e+00 3.529411852359771729e-01 2.690369140625000000e+03 3.477294921875000000e+00 4.000000000000000000e+00 2.098752746582031250e+02 3.475000000000000000e+01 5.525000000000000000e+01
5.500000000000000000e+01 7.467384615384617064e+02 3.606624755859375000e+02 2.668304443359375000e+00 0.000000000000000000e+00 0.000000000000000000e+00 2.701286621093750000e+03 3.495728731155395508e+00 4.000000000000000000e+00 2.165968475341796875e+02 3.575000000000000000e+01 5.525000000000000000e+01
6.400000000000000000e+01 7.070461538461543114e+02 3.666450195312500000e+02 2.713256835937500000e+00 0.000000000000000000e+00 5.294117927551269531e-01 2.715964111328125000e+03 3.527613401412963867e+00 4.000000000000000000e+00 1.975652770996093750e+02 3.625000000000000000e+01 5.525000000000000000e+01
3.800000000000000000e+01 7.002307692307696243e+02 3.711817321777343750e+02 2.758239746093750000e+00 0.000000000000000000e+00 2.941176593303680420e-01 2.730641601562500000e+03 3.547604799270629883e+00 3.000000000000000000e+00 1.892053375244140625e+02 3.675000000000000000e+01 5.525000000000000000e+01
3.800000000000000000e+01 6.886923076923078497e+02 3.720867004394531250e+02 2.803192138671875000e+00 0.000000000000000000e+00 2.941176593303680420e-01 2.745319091796875000e+03 3.559853315353393555e+00 3.000000000000000000e+00 2.037382354736328125e+02 3.725000000000000000e+01 5.525000000000000000e+01
8.000000000000000000e+00 6.468846153846156994e+02 3.545175170898437500e+02 2.989807128906250000e+00 0.000000000000000000e+00 3.529411852359771729e-01 2.789095214843750000e+03 3.557503700256347656e+00 1.000000000000000000e+00 1.247041549682617188e+02 3.875000000000000000e+01 5.525000000000000000e+01
3.200000000000000000e+01 6.000923076923077133e+02 3.410231628417968750e+02 3.055450439453125000e+00 0.000000000000000000e+00 2.352941185235977173e-01 2.803669921875000000e+03 3.566973924636840820e+00 3.000000000000000000e+00 1.405825347900390625e+02 3.925000000000000000e+01 5.525000000000000000e+01
5.200000000000000000e+01 5.773769230769231626e+02 3.337171020507812500e+02 3.053955078125000000e+00 0.000000000000000000e+00 6.470588445663452148e-01 2.805899658203125000e+03 3.573183298110961914e+00 4.000000000000000000e+00 1.368650970458984375e+02 3.975000000000000000e+01 5.525000000000000000e+01
5.100000000000000000e+01 5.818769230769229353e+02 3.314318847656250000e+02 3.030120849609375000e+00 0.000000000000000000e+00 2.352941185235977173e-01 2.804013916015625000e+03 3.573166608810424805e+00 4.000000000000000000e+00 1.204514389038085938e+02 4.025000000000000000e+01 5.525000000000000000e+01
5.000000000000000000e+01 5.941153846153843006e+02 3.344762573242187500e+02 3.006256103515625000e+00 0.000000000000000000e+00 8.235294222831726074e-01 2.802128417968750000e+03 3.572174310684204102e+00 4.000000000000000000e+00 1.196098175048828125e+02 4.075000000000000000e+01 5.525000000000000000e+01
5.500000000000000000e+01 6.327615384615385210e+02 3.440140991210937500e+02 2.736450195312500000e+00 0.000000000000000000e+00 8.823529481887817383e-01 2.771249023437500000e+03 3.567663431167602539e+00 4.000000000000000000e+00 1.279598159790039062e+02 4.225000000000000000e+01 5.525000000000000000e+01
5.400000000000000000e+01 6.437846153846155630e+02 3.424568176269531250e+02 2.613464355468750000e+00 0.000000000000000000e+00 5.294117927551269531e-01 2.756752197265625000e+03 3.559275388717651367e+00 4.000000000000000000e+00 1.592570648193359375e+02 4.275000000000000000e+01 5.525000000000000000e+01
4.000000000000000000e+00 5.662076923076922412e+02 2.842868957519531250e+02 1.919525146484375000e+00 0.000000000000000000e+00 2.058823585510253906e+00 2.705059570312500000e+03 3.584138393402099609e+00 1.000000000000000000e+00 1.624299011230468750e+02 4.575000000000000000e+01 5.525000000000000000e+01
5.200000000000000000e+01 5.487461538461537884e+02 2.454719085693359375e+02 1.847015380859375000e+00 0.000000000000000000e+00 0.000000000000000000e+00 2.715003662109375000e+03 3.579886913299560547e+00 4.000000000000000000e+00 1.431455535888671875e+02 4.675000000000000000e+01 5.525000000000000000e+01
1.000000000000000000e+01 5.587307692307691696e+02 2.460185699462890625e+02 1.839660644531250000e+00 0.000000000000000000e+00 0.000000000000000000e+00 2.724476318359375000e+03 3.577327489852905273e+00 1.000000000000000000e+00 1.383464660644531250e+02 4.725000000000000000e+01 5.525000000000000000e+01
4.000000000000000000e+00 5.558000000000000682e+02 2.859722290039062500e+02 1.846282958984375000e+00 0.000000000000000000e+00 2.058823585510253906e+00 2.746074462890625000e+03 3.579069375991821289e+00 1.000000000000000000e+00 1.312916107177734375e+02 5.125000000000000000e+01 5.525000000000000000e+01
5.000000000000000000e+00 5.585692307692306713e+02 2.858034973144531250e+02 1.785003662109375000e+00 0.000000000000000000e+00 1.588235259056091309e+00 2.724931884765625000e+03 3.560397863388061523e+00 1.000000000000000000e+00 2.152156524658203125e+02 5.175000000000000000e+01 5.525000000000000000e+01
9.000000000000000000e+00 5.632615384615387484e+02 2.405055236816406250e+02 1.294372558593750000e+00 0.000000000000000000e+00 1.117647051811218262e+00 2.589375976562500000e+03 3.544227123260498047e+00 1.000000000000000000e+00 1.494474029541015625e+02 5.375000000000000000e+01 5.525000000000000000e+01
1.100000000000000000e+01 5.613307692307691923e+02 2.970959472656250000e+02 7.592773437500000000e-01 0.000000000000000000e+00 1.470588207244873047e+00 2.478099121093750000e+03 3.549805402755737305e+00 1.000000000000000000e+00 9.899519348144531250e+01 5.525000000000000000e+01 5.525000000000000000e+01
5.700000000000000000e+01 5.530999999999999091e+02 3.081102600097656250e+02 2.923278808593750000e-01 0.000000000000000000e+00 0.000000000000000000e+00 2.395528564453125000e+03 2.517332553863525391e+00 4.000000000000000000e+00 1.871978759765625000e+02 5.675000000000000000e+01 5.525000000000000000e+01
6.500000000000000000e+01 5.579846153846149264e+02 2.952526855468750000e+02 2.090759277343750000e-01 0.000000000000000000e+00 0.000000000000000000e+00 2.380792968750000000e+03 2.174507141113281250e+00 4.000000000000000000e+00 4.938948974609375000e+02 5.725000000000000000e+01 5.525000000000000000e+01
5.800000000000000000e+01 5.565846153846156312e+02 2.822051086425781250e+02 1.258239746093750000e-01 0.000000000000000000e+00 0.000000000000000000e+00 2.366057373046875000e+03 2.585886955261230469e+00 4.000000000000000000e+00 4.213837280273437500e+02 5.775000000000000000e+01 5.525000000000000000e+01
6.000000000000000000e+00 5.580384615384617746e+02 2.708452453613281250e+02 7.348632812500000000e-02 0.000000000000000000e+00 2.941176593303680420e-01 2.359785156250000000e+03 3.318958759307861328e+00 1.000000000000000000e+00 3.499449768066406250e+02 5.825000000000000000e+01 5.525000000000000000e+01
5.800000000000000000e+01 5.758230769230772239e+02 2.682392272949218750e+02 1.542358398437500000e-01 0.000000000000000000e+00 5.882352963089942932e-02 2.398020507812500000e+03 2.980465888977050781e+00 4.000000000000000000e+00 5.497318725585937500e+02 5.925000000000000000e+01 5.525000000000000000e+01
6.100000000000000000e+01 5.865153846153846189e+02 2.691986389160156250e+02 1.946411132812500000e-01 0.000000000000000000e+00 0.000000000000000000e+00 2.417138183593750000e+03 1.953921437263488770e+00 4.000000000000000000e+00 6.353314819335937500e+02 5.975000000000000000e+01 5.525000000000000000e+01
4.400000000000000000e+01 5.366230769230768374e+02 2.573703002929687500e+02 2.781982421875000000e-01 0.000000000000000000e+00 0.000000000000000000e+00 2.446623046875000000e+03 2.177208185195922852e+00 3.000000000000000000e+00 4.412179565429687500e+02 6.025000000000000000e+01 5.525000000000000000e+01
3.300000000000000000e+01 4.955076923076927642e+02 2.448314056396484375e+02 4.049072265625000000e-01 0.000000000000000000e+00 8.823529481887817383e-01 2.486475097656250000e+03 3.394905090332031250e+00 3.000000000000000000e+00 3.096231689453125000e+02 6.075000000000000000e+01 5.525000000000000000e+01
1.200000000000000000e+01 4.648461538461540385e+02 2.349660491943359375e+02 5.316467285156250000e-01 0.000000000000000000e+00 1.352941155433654785e+00 2.526327148437500000e+03 3.446472167968750000e+00 1.000000000000000000e+00 2.400123443603515625e+02 6.125000000000000000e+01 5.525000000000000000e+01
8.000000000000000000e+00 4.463923076923076678e+02 1.934383697509765625e+02 1.028686523437500000e+00 0.000000000000000000e+00 1.176470637321472168e+00 2.678186035156250000e+03 3.509185314178466797e+00 1.000000000000000000e+00 1.576197204589843750e+02 6.375000000000000000e+01 5.525000000000000000e+01
3.000000000000000000e+00 4.011923076923078497e+02 1.906457366943359375e+02 9.167175292968750000e-01 0.000000000000000000e+00 1.647058844566345215e+00 2.686310791015625000e+03 3.503225088119506836e+00 1.000000000000000000e+00 8.717739105224609375e+01 6.525000000000000000e+01 5.525000000000000000e+01
2.800000000000000000e+01 1.463653846153845961e+03 4.628508300781250000e+02 7.830383300781250000e+00 0.000000000000000000e+00 0.000000000000000000e+00 3.244949951171875000e+03 3.643742322921752930e+00 3.000000000000000000e+00 1.567364501953125000e+02 -4.250000000000000000e+00 5.575000000000000000e+01
5.800000000000000000e+01 9.973076923076919229e+02 4.650332336425781250e+02 7.774261474609375000e+00 0.000000000000000000e+00 0.000000000000000000e+00 3.234195800781250000e+03 3.601208448410034180e+00 4.000000000000000000e+00 2.602102050781250000e+02 -3.750000000000000000e+00 5.575000000000000000e+01
6.000000000000000000e+00 9.377076923076929234e+02 4.839064636230468750e+02 8.238861083984375000e+00 0.000000000000000000e+00 0.000000000000000000e+00 3.318177490234375000e+03 3.616486310958862305e+00 1.000000000000000000e+00 2.700818481445312500e+02 -2.750000000000000000e+00 5.575000000000000000e+01
4.100000000000000000e+01 8.136307692307692605e+02 4.023443908691406250e+02 6.247863769531250000e+00 0.000000000000000000e+00 0.000000000000000000e+00 3.057776123046875000e+03 3.582426309585571289e+00 3.000000000000000000e+00 1.143405609130859375e+02 2.175000000000000000e+01 5.575000000000000000e+01
9.000000000000000000e+00 6.338769230769230489e+02 3.415253601074218750e+02 3.813751220703125000e+00 0.000000000000000000e+00 2.941176593303680420e-01 2.848088623046875000e+03 3.490228414535522461e+00 1.000000000000000000e+00 1.611403045654296875e+02 2.675000000000000000e+01 5.575000000000000000e+01
5.200000000000000000e+01 6.339923076923071221e+02 3.389391174316406250e+02 3.733337402343750000e+00 0.000000000000000000e+00 0.000000000000000000e+00 2.842287597656250000e+03 3.486732959747314453e+00 4.000000000000000000e+00 1.413878631591796875e+02 2.725000000000000000e+01 5.575000000000000000e+01
1.600000000000000000e+01 6.916538461538459615e+02 3.667634582519531250e+02 3.493469238281250000e+00 0.000000000000000000e+00 0.000000000000000000e+00 2.813396728515625000e+03 3.489161491394042969e+00 1.000000000000000000e+00 1.345257720947265625e+02 2.875000000000000000e+01 5.575000000000000000e+01
3.400000000000000000e+01 6.971307692307692605e+02 3.773743591308593750e+02 3.414154052734375000e+00 0.000000000000000000e+00 4.705882370471954346e-01 2.798405517578125000e+03 3.483283281326293945e+00 3.000000000000000000e+00 1.607744903564453125e+02 2.925000000000000000e+01 5.575000000000000000e+01
4.300000000000000000e+01 7.006307692307690331e+02 3.849217529296875000e+02 3.334838867187500000e+00 0.000000000000000000e+00 0.000000000000000000e+00 2.783414062500000000e+03 3.473835706710815430e+00 3.000000000000000000e+00 1.606144409179687500e+02 2.975000000000000000e+01 5.575000000000000000e+01
6.100000000000000000e+01 6.817769230769229125e+02 3.910605163574218750e+02 3.023101806640625000e+00 0.000000000000000000e+00 0.000000000000000000e+00 2.716355712890625000e+03 3.453217267990112305e+00 4.000000000000000000e+00 1.793888244628906250e+02 3.125000000000000000e+01 5.575000000000000000e+01
4.700000000000000000e+01 6.960538461538466208e+02 3.889487609863281250e+02 2.914306640625000000e+00 0.000000000000000000e+00 0.000000000000000000e+00 2.692530761718750000e+03 3.454808235168457031e+00 4.000000000000000000e+00 1.917646636962890625e+02 3.175000000000000000e+01 5.575000000000000000e+01
6.900000000000000000e+01 7.004461538461540613e+02 3.820312194824218750e+02 2.806579589843750000e+00 0.000000000000000000e+00 2.352941185235977173e-01 2.675048828125000000e+03 3.449293375015258789e+00 4.000000000000000000e+00 1.886741485595703125e+02 3.225000000000000000e+01 5.575000000000000000e+01
7.000000000000000000e+01 7.071999999999995907e+02 3.697787780761718750e+02 2.699218750000000000e+00 0.000000000000000000e+00 0.000000000000000000e+00 2.659681152343750000e+03 3.440109252929687500e+00 4.000000000000000000e+00 2.078202209472656250e+02 3.275000000000000000e+01 5.575000000000000000e+01
5.900000000000000000e+01 7.406153846153845279e+02 3.580831604003906250e+02 2.591888427734375000e+00 0.000000000000000000e+00 0.000000000000000000e+00 2.644313476562500000e+03 3.426886558532714844e+00 4.000000000000000000e+00 2.356796875000000000e+02 3.325000000000000000e+01 5.575000000000000000e+01
6.800000000000000000e+01 7.355923076923080544e+02 3.527805480957031250e+02 2.484527587890625000e+00 0.000000000000000000e+00 2.352941185235977173e-01 2.628946044921875000e+03 3.426462888717651367e+00 4.000000000000000000e+00 2.385067901611328125e+02 3.375000000000000000e+01 5.575000000000000000e+01
8.000000000000000000e+00 7.360999999999997954e+02 3.526694946289062500e+02 2.466705322265625000e+00 0.000000000000000000e+00 2.941176593303680420e-01 2.630799804687500000e+03 3.438353300094604492e+00 1.000000000000000000e+00 1.917571411132812500e+02 3.425000000000000000e+01 5.575000000000000000e+01
2.500000000000000000e+01 7.310615384615385892e+02 3.541786804199218750e+02 2.448883056640625000e+00 0.000000000000000000e+00 2.941176593303680420e-01 2.632653564453125000e+03 3.446569919586181641e+00 3.000000000000000000e+00 1.842936706542968750e+02 3.475000000000000000e+01 5.575000000000000000e+01
5.400000000000000000e+01 7.524769230769229580e+02 3.571544799804687500e+02 2.431060791015625000e+00 0.000000000000000000e+00 0.000000000000000000e+00 2.634507324218750000e+03 3.444733381271362305e+00 4.000000000000000000e+00 2.539553070068359375e+02 3.525000000000000000e+01 5.575000000000000000e+01
2.200000000000000000e+01 7.429461538461536065e+02 3.637884216308593750e+02 2.428314208984375000e+00 0.000000000000000000e+00 0.000000000000000000e+00 2.639497802734375000e+03 3.455502748489379883e+00 3.000000000000000000e+00 2.093105773925781250e+02 3.575000000000000000e+01 5.575000000000000000e+01
1.900000000000000000e+01 7.245769230769227534e+02 3.728866577148437500e+02 2.470855712890625000e+00 0.000000000000000000e+00 2.352941185235977173e-01 2.653898681640625000e+03 3.476777553558349609e+00 1.000000000000000000e+00 2.104065399169921875e+02 3.625000000000000000e+01 5.575000000000000000e+01
3.100000000000000000e+01 7.176076923076924459e+02 3.800448608398437500e+02 2.513397216796875000e+00 0.000000000000000000e+00 2.941176593303680420e-01 2.668299804687500000e+03 3.498313188552856445e+00 3.000000000000000000e+00 2.037430267333984375e+02 3.675000000000000000e+01 5.575000000000000000e+01
3.100000000000000000e+01 6.646615384615383846e+02 3.815458984375000000e+02 2.711425781250000000e+00 0.000000000000000000e+00 2.352941185235977173e-01 2.717116455078125000e+03 3.529586315155029297e+00 3.000000000000000000e+00 1.414339599609375000e+02 3.825000000000000000e+01 5.575000000000000000e+01
2.800000000000000000e+01 6.045769230769229807e+02 3.501765747070312500e+02 2.890380859375000000e+00 0.000000000000000000e+00 5.882353186607360840e-01 2.753403564453125000e+03 3.530740022659301758e+00 3.000000000000000000e+00 1.273995056152343750e+02 3.925000000000000000e+01 5.575000000000000000e+01
2.800000000000000000e+01 5.863615384615387711e+02 3.348977050781250000e+02 2.907012939453125000e+00 0.000000000000000000e+00 0.000000000000000000e+00 2.758828613281250000e+03 3.536697387695312500e+00 3.000000000000000000e+00 1.348472290039062500e+02 3.975000000000000000e+01 5.575000000000000000e+01
2.100000000000000000e+01 5.860384615384614335e+02 3.274940795898437500e+02 2.899383544921875000e+00 0.000000000000000000e+00 6.470588445663452148e-01 2.760013916015625000e+03 3.539960861206054688e+00 3.000000000000000000e+00 1.330545654296875000e+02 4.025000000000000000e+01 5.575000000000000000e+01
6.200000000000000000e+01 5.930846153846156312e+02 3.280605468750000000e+02 2.891723632812500000e+00 0.000000000000000000e+00 0.000000000000000000e+00 2.761199218750000000e+03 3.539551734924316406e+00 4.000000000000000000e+00 1.394352722167968750e+02 4.075000000000000000e+01 5.575000000000000000e+01
5.000000000000000000e+00 6.247230769230770875e+02 3.429080200195312500e+02 2.655517578125000000e+00 0.000000000000000000e+00 0.000000000000000000e+00 2.735120117187500000e+03 3.538478851318359375e+00 1.000000000000000000e+00 8.963477325439453125e+01 4.225000000000000000e+01 5.575000000000000000e+01
2.300000000000000000e+01 6.588076923076922640e+02 3.507274475097656250e+02 2.416473388671875000e+00 0.000000000000000000e+00 1.058823585510253906e+00 2.707574462890625000e+03 3.518220186233520508e+00 3.000000000000000000e+00 1.576955718994140625e+02 4.325000000000000000e+01 5.575000000000000000e+01
5.700000000000000000e+01 6.520769230769230944e+02 3.504769592285156250e+02 2.260162353515625000e+00 0.000000000000000000e+00 5.294117927551269531e-01 2.692816406250000000e+03 3.523289442062377930e+00 4.000000000000000000e+00 1.677914428710937500e+02 4.375000000000000000e+01 5.575000000000000000e+01
2.000000000000000000e+00 5.752230769230772012e+02 2.862978210449218750e+02 1.567993164062500000e+00 0.000000000000000000e+00 1.176470637321472168e+00 2.679822998046875000e+03 3.581908226013183594e+00 1.000000000000000000e+00 7.982432556152343750e+01 4.975000000000000000e+01 5.575000000000000000e+01
1.000000000000000000e+00 5.732769230769231399e+02 2.889307861328125000e+02 1.577880859375000000e+00 0.000000000000000000e+00 2.941176593303680420e-01 2.681965820312500000e+03 3.550550699234008789e+00 1.000000000000000000e+00 1.422375335693359375e+02 5.025000000000000000e+01 5.575000000000000000e+01
2.900000000000000000e+01 5.692769230769231399e+02 2.960820312500000000e+02 1.550415039062500000e+00 0.000000000000000000e+00 4.705882370471954346e-01 2.662194824218750000e+03 3.539501667022705078e+00 3.000000000000000000e+00 1.427646942138671875e+02 5.125000000000000000e+01 5.575000000000000000e+01
3.000000000000000000e+00 5.671999999999999318e+02 2.998106384277343750e+02 1.522552490234375000e+00 0.000000000000000000e+00 1.647058844566345215e+00 2.645092041015625000e+03 3.539841890335083008e+00 1.000000000000000000e+00 1.757770233154296875e+02 5.175000000000000000e+01 5.575000000000000000e+01
8.000000000000000000e+00 5.609461538461541750e+02 2.993664550781250000e+02 1.494689941406250000e+00 0.000000000000000000e+00 9.411764740943908691e-01 2.627989501953125000e+03 3.529870033264160156e+00 1.000000000000000000e+00 9.696598052978515625e+01 5.225000000000000000e+01 5.575000000000000000e+01
1.200000000000000000e+01 5.778461538461535838e+02 2.749252624511718750e+02 2.761230468750000000e-01 0.000000000000000000e+00 0.000000000000000000e+00 2.358984863281250000e+03 3.203501224517822266e+00 1.000000000000000000e+00 2.681890869140625000e+02 5.675000000000000000e+01 5.575000000000000000e+01
6.400000000000000000e+01 5.802461538461543569e+02 2.707473144531250000e+02 1.863708496093750000e-01 0.000000000000000000e+00 0.000000000000000000e+00 2.345183593750000000e+03 3.212478160858154297e+00 4.000000000000000000e+00 3.481006469726562500e+02 5.725000000000000000e+01 5.575000000000000000e+01
6.300000000000000000e+01 5.864769230769229580e+02 2.644736633300781250e+02 9.664916992187500000e-02 0.000000000000000000e+00 0.000000000000000000e+00 2.331382324218750000e+03 3.304807901382446289e+00 4.000000000000000000e+00 4.495975952148437500e+02 5.775000000000000000e+01 5.575000000000000000e+01
1.400000000000000000e+01 5.902538461538457568e+02 2.752911376953125000e+02 6.201171875000000000e-02 0.000000000000000000e+00 8.823529481887817383e-01 2.340685058593750000e+03 3.297256469726562500e+00 1.000000000000000000e+00 2.557078552246093750e+02 5.875000000000000000e+01 5.575000000000000000e+01
2.300000000000000000e+01 5.962230769230766327e+02 2.855300292968750000e+02 8.813476562500000000e-02 0.000000000000000000e+00 0.000000000000000000e+00 2.356407958984375000e+03 2.318139314651489258e+00 3.000000000000000000e+00 3.568796386718750000e+02 5.925000000000000000e+01 5.575000000000000000e+01
1.200000000000000000e+01 5.936461538461536520e+02 2.938711242675781250e+02 1.142578125000000000e-01 0.000000000000000000e+00 0.000000000000000000e+00 2.372131103515625000e+03 1.858095765113830566e+00 1.000000000000000000e+00 4.022795715332031250e+02 5.975000000000000000e+01 5.575000000000000000e+01
5.700000000000000000e+01 5.636230769230767237e+02 2.888214721679687500e+02 1.859130859375000000e-01 0.000000000000000000e+00 0.000000000000000000e+00 2.398249023437500000e+03 8.730442523956298828e-01 4.000000000000000000e+00 4.237033386230468750e+02 6.025000000000000000e+01 5.575000000000000000e+01
7.000000000000000000e+00 4.806153846153847553e+02 2.484653320312500000e+02 5.375366210937500000e-01 0.000000000000000000e+00 4.117647111415863037e-01 2.507787841796875000e+03 3.403270006179809570e+00 1.000000000000000000e+00 1.695072174072265625e+02 6.175000000000000000e+01 5.575000000000000000e+01
1.500000000000000000e+01 4.749923076923076906e+02 2.248060150146484375e+02 7.950439453125000000e-01 0.000000000000000000e+00 1.235294103622436523e+00 2.586432617187500000e+03 3.478887796401977539e+00 1.000000000000000000e+00 1.482505798339843750e+02 6.325000000000000000e+01 5.575000000000000000e+01
2.300000000000000000e+01 4.737076923076926391e+02 2.234702758789062500e+02 8.780212402343750000e-01 0.000000000000000000e+00 1.941176414489746094e+00 2.611711425781250000e+03 3.482593774795532227e+00 3.000000000000000000e+00 1.472206268310546875e+02 6.375000000000000000e+01 5.575000000000000000e+01
5.000000000000000000e+00 4.573923076923077815e+02 2.179678344726562500e+02 8.460388183593750000e-01 0.000000000000000000e+00 1.529411792755126953e+00 2.617668701171875000e+03 3.477044105529785156e+00 1.000000000000000000e+00 1.050799942016601562e+02 6.425000000000000000e+01 5.575000000000000000e+01
3.700000000000000000e+01 4.442076923076924118e+02 2.114480285644531250e+02 8.140258789062500000e-01 0.000000000000000000e+00 1.529411792755126953e+00 2.623625976562500000e+03 3.472503185272216797e+00 3.000000000000000000e+00 1.498819580078125000e+02 6.475000000000000000e+01 5.575000000000000000e+01
1.300000000000000000e+01 4.322923076923077019e+02 2.059377899169921875e+02 7.820434570312500000e-01 0.000000000000000000e+00 2.117647171020507812e+00 2.629583007812500000e+03 3.464020729064941406e+00 1.000000000000000000e+00 1.392074127197265625e+02 6.525000000000000000e+01 5.575000000000000000e+01
1.200000000000000000e+01 4.205615384615382482e+02 2.006166076660156250e+02 7.326354980468750000e-01 0.000000000000000000e+00 1.411764740943908691e+00 2.631375732421875000e+03 3.452080011367797852e+00 1.000000000000000000e+00 9.173625946044921875e+01 6.575000000000000000e+01 5.575000000000000000e+01
1.000000000000000000e+01 3.920923076923076565e+02 1.854173736572265625e+02 3.503723144531250000e-01 0.000000000000000000e+00 5.294117927551269531e-01 2.590333496093750000e+03 3.400354623794555664e+00 1.000000000000000000e+00 1.341020050048828125e+02 6.775000000000000000e+01 5.575000000000000000e+01
4.300000000000000000e+01 3.474776923076924504e+03 5.306786499023437500e+02 7.551086425781250000e+00 0.000000000000000000e+00 0.000000000000000000e+00 3.171944335937500000e+03 3.306905984878540039e+00 3.000000000000000000e+00 2.822248229980468750e+02 -4.750000000000000000e+00 5.625000000000000000e+01
1.000000000000000000e+01 2.125561538461537111e+03 4.933419189453125000e+02 7.483886718750000000e+00 0.000000000000000000e+00 0.000000000000000000e+00 3.160502441406250000e+03 3.368021965026855469e+00 1.000000000000000000e+00 2.223640441894531250e+02 -4.250000000000000000e+00 5.625000000000000000e+01
1.700000000000000000e+01 1.425407692307692059e+03 4.491661682128906250e+02 7.416687011718750000e+00 0.000000000000000000e+00 0.000000000000000000e+00 3.149060302734375000e+03 3.526358366012573242e+00 1.000000000000000000e+00 2.948703613281250000e+02 -3.750000000000000000e+00 5.625000000000000000e+01
2.600000000000000000e+01 8.278384615384616154e+02 4.288492126464843750e+02 9.173278808593750000e+00 0.000000000000000000e+00 5.882353186607360840e-01 3.757770996093750000e+03 3.616972208023071289e+00 3.000000000000000000e+00 7.140469360351562500e+01 9.250000000000000000e+00 5.625000000000000000e+01
6.000000000000000000e+01 6.577230769230772012e+02 3.063738403320312500e+02 5.138427734375000000e+00 0.000000000000000000e+00 2.941176593303680420e-01 2.917000000000000000e+03 3.544521570205688477e+00 4.000000000000000000e+00 8.557504272460937500e+01 2.325000000000000000e+01 5.625000000000000000e+01
1.100000000000000000e+01 6.432538461538460979e+02 3.203738098144531250e+02 3.812072753906250000e+00 0.000000000000000000e+00 2.941176593303680420e-01 2.819618896484375000e+03 1.588371396064758301e+00 1.000000000000000000e+00 1.055383148193359375e+02 2.625000000000000000e+01 5.625000000000000000e+01
3.800000000000000000e+01 6.206615384615383846e+02 3.167056579589843750e+02 3.728607177734375000e+00 0.000000000000000000e+00 0.000000000000000000e+00 2.815429443359375000e+03 3.474416494369506836e+00 3.000000000000000000e+00 1.415827026367187500e+02 2.675000000000000000e+01 5.625000000000000000e+01
5.700000000000000000e+01 6.239615384615383391e+02 3.103964233398437500e+02 3.645141601562500000e+00 0.000000000000000000e+00 2.352941185235977173e-01 2.811240234375000000e+03 3.461386442184448242e+00 4.000000000000000000e+00 1.725693664550781250e+02 2.725000000000000000e+01 5.625000000000000000e+01
3.600000000000000000e+01 6.445615384615387029e+02 3.375185241699218750e+02 3.478332519531250000e+00 0.000000000000000000e+00 0.000000000000000000e+00 2.800125244140625000e+03 3.468178749084472656e+00 3.000000000000000000e+00 1.275952301025390625e+02 2.825000000000000000e+01 5.625000000000000000e+01
6.100000000000000000e+01 6.583307692307691923e+02 3.480492858886718750e+02 3.395294189453125000e+00 0.000000000000000000e+00 0.000000000000000000e+00 2.784991455078125000e+03 3.468717813491821289e+00 4.000000000000000000e+00 1.584466705322265625e+02 2.875000000000000000e+01 5.625000000000000000e+01
5.400000000000000000e+01 6.753461538461535838e+02 3.564807128906250000e+02 3.312286376953125000e+00 0.000000000000000000e+00 0.000000000000000000e+00 2.769857666015625000e+03 3.448511362075805664e+00 4.000000000000000000e+00 1.618443908691406250e+02 2.925000000000000000e+01 5.625000000000000000e+01
4.700000000000000000e+01 6.870846153846148354e+02 3.634421691894531250e+02 3.229248046875000000e+00 0.000000000000000000e+00 0.000000000000000000e+00 2.754723632812500000e+03 3.430879116058349609e+00 4.000000000000000000e+00 1.945494689941406250e+02 2.975000000000000000e+01 5.625000000000000000e+01
3.700000000000000000e+01 6.961384615384613426e+02 3.682058715820312500e+02 3.132934570312500000e+00 0.000000000000000000e+00 3.529411852359771729e-01 2.734416015625000000e+03 3.419148683547973633e+00 3.000000000000000000e+00 1.766916656494140625e+02 3.025000000000000000e+01 5.625000000000000000e+01
5.100000000000000000e+01 6.814999999999998863e+02 3.704202575683593750e+02 3.023345947265625000e+00 0.000000000000000000e+00 2.941176593303680420e-01 2.708934326171875000e+03 3.413951396942138672e+00 4.000000000000000000e+00 1.452864990234375000e+02 3.075000000000000000e+01 5.625000000000000000e+01
5.600000000000000000e+01 7.195461538461539703e+02 3.702350463867187500e+02 2.804199218750000000e+00 0.000000000000000000e+00 0.000000000000000000e+00 2.657971191406250000e+03 3.401292800903320312e+00 4.000000000000000000e+00 1.931185760498046875e+02 3.175000000000000000e+01 5.625000000000000000e+01
5.600000000000000000e+01 7.335076923076921958e+02 3.688145446777343750e+02 2.684234619140625000e+00 0.000000000000000000e+00 0.000000000000000000e+00 2.637312255859375000e+03 3.389134645462036133e+00 4.000000000000000000e+00 2.060797882080078125e+02 3.225000000000000000e+01 5.625000000000000000e+01
1.600000000000000000e+01 7.665769230769227534e+02 3.622132263183593750e+02 2.437347412109375000e+00 0.000000000000000000e+00 0.000000000000000000e+00 2.599209472656250000e+03 3.366489887237548828e+00 1.000000000000000000e+00 2.352922821044921875e+02 3.325000000000000000e+01 5.625000000000000000e+01
7.000000000000000000e+00 7.383076923076920366e+02 3.635465393066406250e+02 2.216278076171875000e+00 0.000000000000000000e+00 3.529411852359771729e-01 2.578403808593750000e+03 2.915880203247070312e+00 1.000000000000000000e+00 1.840216979980468750e+02 3.525000000000000000e+01 5.625000000000000000e+01
6.300000000000000000e+01 7.125307692307693515e+02 3.736981506347656250e+02 2.236999511718750000e+00 0.000000000000000000e+00 5.294117927551269531e-01 2.594586425781250000e+03 3.454945564270019531e+00 4.000000000000000000e+00 1.913360748291015625e+02 3.625000000000000000e+01 5.625000000000000000e+01
4.900000000000000000e+01 7.232076923076919002e+02 3.798663330078125000e+02 2.273101806640625000e+00 0.000000000000000000e+00 2.941176593303680420e-01 2.607883056640625000e+03 3.457196474075317383e+00 4.000000000000000000e+00 2.089879302978515625e+02 3.675000000000000000e+01 5.625000000000000000e+01
6.000000000000000000e+00 7.083076923076920366e+02 3.844695129394531250e+02 2.309173583984375000e+00 0.000000000000000000e+00 8.823529481887817383e-01 2.621179931640625000e+03 3.470730781555175781e+00 1.000000000000000000e+00 2.199314880371093750e+02 3.725000000000000000e+01 5.625000000000000000e+01
2.500000000000000000e+01 6.922230769230772012e+02 3.840636901855468750e+02 2.380493164062500000e+00 0.000000000000000000e+00 0.000000000000000000e+00 2.638226806640625000e+03 3.478799104690551758e+00 3.000000000000000000e+00 2.056676177978515625e+02 3.775000000000000000e+01 5.625000000000000000e+01
1.900000000000000000e+01 6.779692307692307622e+02 3.770984191894531250e+02 2.487030029296875000e+00 0.000000000000000000e+00 5.882353186607360840e-01 2.659023437500000000e+03 3.478904485702514648e+00 1.000000000000000000e+00 2.161219177246093750e+02 3.825000000000000000e+01 5.625000000000000000e+01
2.100000000000000000e+01 6.446230769230768374e+02 3.618907775878906250e+02 2.593566894531250000e+00 0.000000000000000000e+00 3.529411852359771729e-01 2.679820312500000000e+03 3.480133771896362305e+00 3.000000000000000000e+00 1.662014770507812500e+02 3.875000000000000000e+01 5.625000000000000000e+01
5.800000000000000000e+01 6.241692307692305803e+02 3.420175170898437500e+02 2.700103759765625000e+00 0.000000000000000000e+00 0.000000000000000000e+00 2.700617187500000000e+03 3.475935935974121094e+00 4.000000000000000000e+00 1.971118621826171875e+02 3.925000000000000000e+01 5.625000000000000000e+01
1.100000000000000000e+01 5.928153846153845734e+02 3.220270690917968750e+02 2.745727539062500000e+00 0.000000000000000000e+00 5.294117927551269531e-01 2.716503173828125000e+03 3.512515068054199219e+00 1.000000000000000000e+00 1.035050125122070312e+02 4.075000000000000000e+01 5.625000000000000000e+01
4.100000000000000000e+01 5.966461538461539931e+02 3.240190734863281250e+02 2.752624511718750000e+00 0.000000000000000000e+00 5.294117927551269531e-01 2.720389160156250000e+03 3.518825054168701172e+00 3.000000000000000000e+00 1.336324920654296875e+02 4.125000000000000000e+01 5.625000000000000000e+01
5.400000000000000000e+01 6.066000000000000227e+02 3.286668395996093750e+02 2.648590087890625000e+00 0.000000000000000000e+00 0.000000000000000000e+00 2.707881591796875000e+03 3.518601179122924805e+00 4.000000000000000000e+00 1.262442016601562500e+02 4.175000000000000000e+01 5.625000000000000000e+01
2.400000000000000000e+01 6.178923076923075541e+02 3.388209533691406250e+02 2.544525146484375000e+00 0.000000000000000000e+00 9.411764740943908691e-01 2.695373779296875000e+03 3.524540424346923828e+00 3.000000000000000000e+00 9.479887390136718750e+01 4.225000000000000000e+01 5.625000000000000000e+01
5.600000000000000000e+01 6.158692307692309669e+02 3.510410461425781250e+02 2.440490722656250000e+00 0.000000000000000000e+00 6.470588445663452148e-01 2.682865966796875000e+03 3.530601501464843750e+00 4.000000000000000000e+00 8.370264434814453125e+01 4.275000000000000000e+01 5.625000000000000000e+01
5.200000000000000000e+01 6.181230769230767237e+02 3.663692016601562500e+02 1.995239257812500000e+00 0.000000000000000000e+00 6.470588445663452148e-01 2.636957031250000000e+03 3.545485496520996094e+00 4.000000000000000000e+00 7.116954803466796875e+01 4.425000000000000000e+01 5.625000000000000000e+01
3.300000000000000000e+01 5.993538461538463480e+02 3.577776489257812500e+02 1.832061767578125000e+00 0.000000000000000000e+00 8.235294222831726074e-01 2.620722167968750000e+03 3.560106039047241211e+00 3.000000000000000000e+00 8.462583923339843750e+01 4.475000000000000000e+01 5.625000000000000000e+01
2.100000000000000000e+01 5.835538461538459387e+02 3.432364196777343750e+02 1.702270507812500000e+00 0.000000000000000000e+00 5.294117927551269531e-01 2.609269531250000000e+03 3.564818859100341797e+00 3.000000000000000000e+00 9.329295349121093750e+01 4.525000000000000000e+01 5.625000000000000000e+01
4.300000000000000000e+01 5.689846153846154948e+02 3.262550354003906250e+02 1.605926513671875000e+00 0.000000000000000000e+00 8.235294222831726074e-01 2.602598876953125000e+03 3.569703340530395508e+00 3.000000000000000000e+00 9.313710021972656250e+01 4.575000000000000000e+01 5.625000000000000000e+01
4.700000000000000000e+01 5.709307692307692150e+02 3.066261291503906250e+02 1.364562988281250000e+00 0.000000000000000000e+00 5.294117927551269531e-01 2.589356689453125000e+03 3.560575723648071289e+00 4.000000000000000000e+00 1.032450180053710938e+02 4.725000000000000000e+01 5.625000000000000000e+01
4.200000000000000000e+01 5.700076923076923094e+02 3.041604614257812500e+02 1.331817626953125000e+00 0.000000000000000000e+00 5.882353186607360840e-01 2.591712646484375000e+03 3.342723131179809570e+00 3.000000000000000000e+00 9.298488616943359375e+01 4.775000000000000000e+01 5.625000000000000000e+01
4.800000000000000000e+01 5.751230769230768374e+02 2.986727600097656250e+02 1.299072265625000000e+00 0.000000000000000000e+00 5.294117927551269531e-01 2.594068603515625000e+03 3.185789108276367188e+00 4.000000000000000000e+00 1.222239074707031250e+02 4.825000000000000000e+01 5.625000000000000000e+01
4.100000000000000000e+01 5.966384615384612289e+02 2.951004333496093750e+02 1.266326904296875000e+00 0.000000000000000000e+00 5.294117927551269531e-01 2.596424560546875000e+03 3.198471546173095703e+00 3.000000000000000000e+00 1.145263519287109375e+02 4.875000000000000000e+01 5.625000000000000000e+01
7.000000000000000000e+00 5.826999999999999318e+02 2.988039245605468750e+02 1.271881103515625000e+00 0.000000000000000000e+00 9.411764740943908691e-01 2.598253173828125000e+03 3.507935762405395508e+00 1.000000000000000000e+00 1.815212707519531250e+02 5.025000000000000000e+01 5.625000000000000000e+01
5.000000000000000000e+00 5.558076923076922640e+02 2.816036376953125000e+02 1.128570556640625000e+00 0.000000000000000000e+00 0.000000000000000000e+00 2.505374755859375000e+03 3.490878105163574219e+00 1.000000000000000000e+00 1.060166778564453125e+02 5.325000000000000000e+01 5.625000000000000000e+01
6.300000000000000000e+01 5.814769230769234127e+02 2.823215026855468750e+02 3.380432128906250000e-01 0.000000000000000000e+00 2.941176593303680420e-01 2.335613037109375000e+03 3.438936710357666016e+00 4.000000000000000000e+00 1.400018463134765625e+02 5.625000000000000000e+01 5.625000000000000000e+01
2.800000000000000000e+01 5.890846153846154039e+02 2.725719604492187500e+02 2.409362792968750000e-01 0.000000000000000000e+00 0.000000000000000000e+00 2.322615722656250000e+03 3.396638631820678711e+00 3.000000000000000000e+00 2.047823486328125000e+02 5.675000000000000000e+01 5.625000000000000000e+01
5.100000000000000000e+01 5.995923076923074859e+02 2.803668823242187500e+02 1.438293457031250000e-01 0.000000000000000000e+00 0.000000000000000000e+00 2.309618164062500000e+03 3.242974996566772461e+00 4.000000000000000000e+00 3.235385742187500000e+02 5.725000000000000000e+01 5.625000000000000000e+01
6.400000000000000000e+01 6.054461538461539476e+02 2.869165954589843750e+02 4.672241210937500000e-02 0.000000000000000000e+00 0.000000000000000000e+00 2.296620605468750000e+03 3.061486959457397461e+00 4.000000000000000000e+00 2.876246337890625000e+02 5.775000000000000000e+01 5.625000000000000000e+01
5.200000000000000000e+01 6.201000000000000227e+02 3.002133789062500000e+02 6.103515625000000000e-04 0.000000000000000000e+00 0.000000000000000000e+00 2.315013671875000000e+03 1.527811527252197266e+00 4.000000000000000000e+00 3.405415954589843750e+02 5.925000000000000000e+01 5.625000000000000000e+01
6.700000000000000000e+01 6.083230769230769965e+02 3.049009094238281250e+02 1.248168945312500000e-02 0.000000000000000000e+00 0.000000000000000000e+00 2.327520996093750000e+03 1.035027861595153809e+00 4.000000000000000000e+00 4.203291625976562500e+02 5.975000000000000000e+01 5.625000000000000000e+01
5.000000000000000000e+01 5.889692307692309896e+02 3.015850524902343750e+02 7.202148437500000000e-02 0.000000000000000000e+00 0.000000000000000000e+00 2.350319335937500000e+03 8.497921824455261230e-01 4.000000000000000000e+00 3.990803833007812500e+02 6.025000000000000000e+01 5.625000000000000000e+01
5.000000000000000000e+01 5.416923076923077360e+02 2.907702331542968750e+02 1.791992187500000000e-01 0.000000000000000000e+00 0.000000000000000000e+00 2.383408935546875000e+03 2.515938282012939453e+00 4.000000000000000000e+00 2.954912719726562500e+02 6.075000000000000000e+01 5.625000000000000000e+01
1.300000000000000000e+01 5.075230769230769283e+02 2.647938842773437500e+02 3.936157226562500000e-01 0.000000000000000000e+00 5.882353186607360840e-01 2.449588134765625000e+03 2.189954042434692383e+00 1.000000000000000000e+00 1.724181976318359375e+02 6.175000000000000000e+01 5.625000000000000000e+01
6.000000000000000000e+00 5.016615384615384414e+02 2.480457305908203125e+02 5.545654296875000000e-01 0.000000000000000000e+00 8.235294222831726074e-01 2.498775146484375000e+03 3.436388254165649414e+00 1.000000000000000000e+00 1.114876251220703125e+02 6.275000000000000000e+01 5.625000000000000000e+01
2.100000000000000000e+01 4.818846153846153584e+02 2.371450805664062500e+02 6.815795898437500000e-01 0.000000000000000000e+00 0.000000000000000000e+00 2.554274902343750000e+03 3.432908058166503906e+00 3.000000000000000000e+00 1.325026245117187500e+02 6.425000000000000000e+01 5.625000000000000000e+01
6.000000000000000000e+00 4.702230769230770306e+02 2.294865112304687500e+02 6.553039550781250000e-01 0.000000000000000000e+00 2.058823585510253906e+00 2.563015380859375000e+03 3.431051492691040039e+00 1.000000000000000000e+00 6.704927825927734375e+01 6.475000000000000000e+01 5.625000000000000000e+01
4.300000000000000000e+01 4.604538461538461434e+02 2.232852935791015625e+02 6.290283203125000000e-01 0.000000000000000000e+00 1.000000000000000000e+00 2.571755615234375000e+03 3.423685073852539062e+00 3.000000000000000000e+00 1.345516967773437500e+02 6.525000000000000000e+01 5.625000000000000000e+01
1.700000000000000000e+01 4.444384615384615813e+02 2.194146118164062500e+02 5.865173339843750000e-01 0.000000000000000000e+00 1.764705896377563477e+00 2.576464355468750000e+03 3.422708988189697266e+00 1.000000000000000000e+00 7.059568786621093750e+01 6.575000000000000000e+01 5.625000000000000000e+01
1.800000000000000000e+01 2.930869230769230853e+03 5.837003784179687500e+02 7.734161376953125000e+00 0.000000000000000000e+00 0.000000000000000000e+00 3.185818847656250000e+03 1.462555289268493652e+00 1.000000000000000000e+00 6.275318603515625000e+02 -4.750000000000000000e+00 5.675000000000000000e+01
2.500000000000000000e+01 2.106930769230769329e+03 5.548103027343750000e+02 7.607482910156250000e+00 0.000000000000000000e+00 0.000000000000000000e+00 3.163267333984375000e+03 2.940403699874877930e+00 3.000000000000000000e+00 4.703217773437500000e+02 -4.250000000000000000e+00 5.675000000000000000e+01
1.100000000000000000e+01 1.331807692307691923e+03 4.716355590820312500e+02 7.480804443359375000e+00 0.000000000000000000e+00 0.000000000000000000e+00 3.140716064453125000e+03 3.122447967529296875e+00 1.000000000000000000e+00 3.625198669433593750e+02 -3.750000000000000000e+00 5.675000000000000000e+01
2.100000000000000000e+01 1.229215384615384892e+03 4.002903137207031250e+02 7.848815917968750000e+00 0.000000000000000000e+00 0.000000000000000000e+00 3.206657714843750000e+03 3.318328857421875000e+00 3.000000000000000000e+00 3.633817443847656250e+02 -3.250000000000000000e+00 5.675000000000000000e+01
3.800000000000000000e+01 7.882692307692304894e+02 3.678193359375000000e+02 8.579406738281250000e+00 0.000000000000000000e+00 0.000000000000000000e+00 3.501272216796875000e+03 3.615591526031494141e+00 3.000000000000000000e+00 6.052594375610351562e+01 9.750000000000000000e+00 5.675000000000000000e+01
6.300000000000000000e+01 9.030384615384615472e+02 4.451020202636718750e+02 7.425292968750000000e+00 0.000000000000000000e+00 0.000000000000000000e+00 3.363606445312500000e+03 3.353956460952758789e+00 4.000000000000000000e+00 1.758786621093750000e+02 1.325000000000000000e+01 5.675000000000000000e+01
6.000000000000000000e+01 8.591923076923080771e+02 4.163653259277343750e+02 7.424377441406250000e+00 0.000000000000000000e+00 0.000000000000000000e+00 3.355833740234375000e+03 2.591903209686279297e+00 4.000000000000000000e+00 1.385520324707031250e+02 1.375000000000000000e+01 5.675000000000000000e+01
6.500000000000000000e+01 8.149384615384610697e+02 3.720779418945312500e+02 7.423431396484375000e+00 0.000000000000000000e+00 0.000000000000000000e+00 3.348060791015625000e+03 2.241542339324951172e+00 4.000000000000000000e+00 1.588611450195312500e+02 1.425000000000000000e+01 5.675000000000000000e+01
3.500000000000000000e+01 7.154538461538461434e+02 2.956061401367187500e+02 7.527862548828125000e+00 0.000000000000000000e+00 0.000000000000000000e+00 3.320866210937500000e+03 2.227182626724243164e+00 3.000000000000000000e+00 1.683968811035156250e+02 1.525000000000000000e+01 5.675000000000000000e+01
5.000000000000000000e+01 6.395615384615383618e+02 2.599871520996093750e+02 7.739501953125000000e+00 0.000000000000000000e+00 0.000000000000000000e+00 3.289794921875000000e+03 2.234594106674194336e+00 4.000000000000000000e+00 1.404634552001953125e+02 1.575000000000000000e+01 5.675000000000000000e+01
2.000000000000000000e+01 7.642769230769226851e+02 3.332088012695312500e+02 6.504211425781250000e+00 0.000000000000000000e+00 5.294117927551269531e-01 2.962738037109375000e+03 3.505289077758789062e+00 3.000000000000000000e+00 6.697109222412109375e+01 2.175000000000000000e+01 5.675000000000000000e+01
6.300000000000000000e+01 7.377692307692309441e+02 2.976175842285156250e+02 6.017486572265625000e+00 0.000000000000000000e+00 0.000000000000000000e+00 2.922127197265625000e+03 3.483761787414550781e+00 4.000000000000000000e+00 7.637767028808593750e+01 2.225000000000000000e+01 5.675000000000000000e+01
1.200000000000000000e+01 7.233307692307694197e+02 2.855840148925781250e+02 5.625915527343750000e+00 0.000000000000000000e+00 0.000000000000000000e+00 2.894290039062500000e+03 3.475123167037963867e+00 1.000000000000000000e+00 1.162440261840820312e+02 2.275000000000000000e+01 5.675000000000000000e+01
5.800000000000000000e+01 6.482076923076922412e+02 2.873854370117187500e+02 5.033172607421875000e+00 0.000000000000000000e+00 5.882352963089942932e-02 2.864163818359375000e+03 3.521001338958740234e+00 4.000000000000000000e+00 1.567174243927001953e+01 2.375000000000000000e+01 5.675000000000000000e+01
3.900000000000000000e+01 6.645230769230770420e+02 3.122741394042968750e+02 4.501739501953125000e+00 0.000000000000000000e+00 0.000000000000000000e+00 2.838147460937500000e+03 3.507069110870361328e+00 3.000000000000000000e+00 4.199258041381835938e+01 2.475000000000000000e+01 5.675000000000000000e+01
5.600000000000000000e+01 6.933153846153848008e+02 3.180057678222656250e+02 4.287170410156250000e+00 0.000000000000000000e+00 0.000000000000000000e+00 2.828564208984375000e+03 3.412457704544067383e+00 4.000000000000000000e+00 8.873045349121093750e+01 2.525000000000000000e+01 5.675000000000000000e+01
2.300000000000000000e+01 6.937461538461540158e+02 3.105531311035156250e+02 4.072570800781250000e+00 0.000000000000000000e+00 0.000000000000000000e+00 2.818980957031250000e+03 3.437428951263427734e+00 3.000000000000000000e+00 1.556357116699218750e+02 2.575000000000000000e+01 5.675000000000000000e+01
4.100000000000000000e+01 6.726538461538461888e+02 3.138181457519531250e+02 3.858001708984375000e+00 0.000000000000000000e+00 5.882352963089942932e-02 2.809397705078125000e+03 3.434435367584228516e+00 3.000000000000000000e+00 1.098582229614257812e+02 2.625000000000000000e+01 5.675000000000000000e+01
6.000000000000000000e+00 6.384769230769231854e+02 3.266265258789062500e+02 3.779479980468750000e+00 0.000000000000000000e+00 0.000000000000000000e+00 2.808406738281250000e+03 3.435195684432983398e+00 1.000000000000000000e+00 9.135556030273437500e+01 2.675000000000000000e+01 5.675000000000000000e+01
3.700000000000000000e+01 6.495846153846152902e+02 3.393106994628906250e+02 3.545288085937500000e+00 0.000000000000000000e+00 5.294117927551269531e-01 2.802927490234375000e+03 3.432758808135986328e+00 3.000000000000000000e+00 1.021720046997070312e+02 2.825000000000000000e+01 5.675000000000000000e+01
1.300000000000000000e+01 6.907846153846159041e+02 3.526873779296875000e+02 3.398773193359375000e+00 0.000000000000000000e+00 0.000000000000000000e+00 2.780893554687500000e+03 3.397206544876098633e+00 1.000000000000000000e+00 2.019937438964843750e+02 2.925000000000000000e+01 5.675000000000000000e+01
5.000000000000000000e+01 6.887230769230768601e+02 3.536138000488281250e+02 3.325500488281250000e+00 0.000000000000000000e+00 0.000000000000000000e+00 2.769876464843750000e+03 3.399918556213378906e+00 4.000000000000000000e+00 2.189666900634765625e+02 2.975000000000000000e+01 5.675000000000000000e+01
2.700000000000000000e+01 6.557999999999999545e+02 3.539901733398437500e+02 3.230560302734375000e+00 0.000000000000000000e+00 1.058823585510253906e+00 2.750823486328125000e+03 3.421592950820922852e+00 3.000000000000000000e+00 9.970418548583984375e+01 3.025000000000000000e+01 5.675000000000000000e+01
5.200000000000000000e+01 6.530384615384615472e+02 3.536959838867187500e+02 3.113983154296875000e+00 0.000000000000000000e+00 4.705882370471954346e-01 2.723734375000000000e+03 3.427127122879028320e+00 4.000000000000000000e+00 1.008429565429687500e+02 3.075000000000000000e+01 5.675000000000000000e+01
7.100000000000000000e+01 6.937461538461540158e+02 3.550222778320312500e+02 2.997375488281250000e+00 0.000000000000000000e+00 0.000000000000000000e+00 2.696645263671875000e+03 3.392342090606689453e+00 4.000000000000000000e+00 1.284442291259765625e+02 3.125000000000000000e+01 5.675000000000000000e+01
6.100000000000000000e+01 7.650692307692305576e+02 3.676849975585937500e+02 2.739288330078125000e+00 0.000000000000000000e+00 0.000000000000000000e+00 2.642800292968750000e+03 3.326253414154052734e+00 4.000000000000000000e+00 2.319768981933593750e+02 3.225000000000000000e+01 5.675000000000000000e+01
6.600000000000000000e+01 7.674000000000004320e+02 3.729861450195312500e+02 2.589477539062500000e+00 0.000000000000000000e+00 0.000000000000000000e+00 2.616155273437500000e+03 3.328984260559082031e+00 4.000000000000000000e+00 2.277443084716796875e+02 3.275000000000000000e+01 5.675000000000000000e+01
4.200000000000000000e+01 7.858307692307693060e+02 3.744849243164062500e+02 2.439697265625000000e+00 0.000000000000000000e+00 0.000000000000000000e+00 2.589510009765625000e+03 3.327394962310791016e+00 3.000000000000000000e+00 2.663472290039062500e+02 3.325000000000000000e+01 5.675000000000000000e+01
5.800000000000000000e+01 7.718076923076926050e+02 3.737247924804687500e+02 2.289886474609375000e+00 0.000000000000000000e+00 0.000000000000000000e+00 2.562864990234375000e+03 3.332325935363769531e+00 4.000000000000000000e+00 2.242115325927734375e+02 3.375000000000000000e+01 5.675000000000000000e+01
4.900000000000000000e+01 7.799076923076926278e+02 3.725469055175781250e+02 2.229705810546875000e+00 0.000000000000000000e+00 0.000000000000000000e+00 2.558752441406250000e+03 3.348734378814697266e+00 4.000000000000000000e+00 2.472279968261718750e+02 3.425000000000000000e+01 5.675000000000000000e+01
5.000000000000000000e+01 7.459307692307694424e+02 3.704930114746093750e+02 2.169525146484375000e+00 0.000000000000000000e+00 0.000000000000000000e+00 2.554640136718750000e+03 3.377924442291259766e+00 4.000000000000000000e+00 2.062480773925781250e+02 3.475000000000000000e+01 5.675000000000000000e+01
5.600000000000000000e+01 7.017153846153846644e+02 3.684086608886718750e+02 2.064331054687500000e+00 0.000000000000000000e+00 1.117647051811218262e+00 2.548994140625000000e+03 3.420962572097778320e+00 4.000000000000000000e+00 1.395216217041015625e+02 3.575000000000000000e+01 5.675000000000000000e+01
1.000000000000000000e+01 6.521538461538461888e+02 3.696746520996093750e+02 2.065948486328125000e+00 0.000000000000000000e+00 1.764705926179885864e-01 2.567604736328125000e+03 3.466898918151855469e+00 1.000000000000000000e+00 1.227999954223632812e+02 3.725000000000000000e+01 5.675000000000000000e+01
3.000000000000000000e+01 6.349307692307689877e+02 3.530241088867187500e+02 2.178100585937500000e+00 0.000000000000000000e+00 2.941176593303680420e-01 2.595942871093750000e+03 3.455063104629516602e+00 3.000000000000000000e+00 1.351334228515625000e+02 3.825000000000000000e+01 5.675000000000000000e+01
6.000000000000000000e+01 6.114923076923078042e+02 3.174425048828125000e+02 2.353057861328125000e+00 0.000000000000000000e+00 0.000000000000000000e+00 2.636728271484375000e+03 3.451181173324584961e+00 4.000000000000000000e+00 1.262282867431640625e+02 3.975000000000000000e+01 5.675000000000000000e+01
6.100000000000000000e+01 5.882153846153846644e+02 3.185919799804687500e+02 2.371948242187500000e+00 0.000000000000000000e+00 7.647058963775634766e-01 2.644544433593750000e+03 3.484899044036865234e+00 4.000000000000000000e+00 1.257987442016601562e+02 4.075000000000000000e+01 5.675000000000000000e+01
3.100000000000000000e+01 5.854384615384617518e+02 3.187780151367187500e+02 2.381378173828125000e+00 0.000000000000000000e+00 0.000000000000000000e+00 2.648452636718750000e+03 3.493711471557617188e+00 3.000000000000000000e+00 1.276579513549804688e+02 4.125000000000000000e+01 5.675000000000000000e+01
6.400000000000000000e+01 5.984846153846151537e+02 3.202359619140625000e+02 2.298614501953125000e+00 0.000000000000000000e+00 5.882352963089942932e-02 2.638948486328125000e+03 3.493863582611083984e+00 4.000000000000000000e+00 1.144354400634765625e+02 4.175000000000000000e+01 5.675000000000000000e+01
3.500000000000000000e+01 6.090692307692310123e+02 3.261117858886718750e+02 2.215820312500000000e+00 0.000000000000000000e+00 0.000000000000000000e+00 2.629444580078125000e+03 3.490066528320312500e+00 3.000000000000000000e+00 9.682458496093750000e+01 4.225000000000000000e+01 5.675000000000000000e+01
1.000000000000000000e+01 6.189230769230773603e+02 3.365926208496093750e+02 2.133056640625000000e+00 0.000000000000000000e+00 0.000000000000000000e+00 2.619940673828125000e+03 3.486674547195434570e+00 1.000000000000000000e+00 1.410707550048828125e+02 4.275000000000000000e+01 5.675000000000000000e+01
6.000000000000000000e+01 6.226230769230769511e+02 3.556287536621093750e+02 1.889862060546875000e+00 0.000000000000000000e+00 3.529411852359771729e-01 2.594357910156250000e+03 3.486114025115966797e+00 4.000000000000000000e+00 1.260701065063476562e+02 4.375000000000000000e+01 5.675000000000000000e+01
6.600000000000000000e+01 6.023461538461540385e+02 3.542673950195312500e+02 1.600067138671875000e+00 0.000000000000000000e+00 2.352941185235977173e-01 2.564830322265625000e+03 3.522106170654296875e+00 4.000000000000000000e+00 1.103767776489257812e+02 4.475000000000000000e+01 5.675000000000000000e+01
1.000000000000000000e+01 5.905076923076924231e+02 3.441477966308593750e+02 1.484558105468750000e+00 0.000000000000000000e+00 0.000000000000000000e+00 2.554042236328125000e+03 3.533853292465209961e+00 1.000000000000000000e+00 1.112752227783203125e+02 4.525000000000000000e+01 5.675000000000000000e+01
2.500000000000000000e+01 5.780846153846151765e+02 3.316989440917968750e+02 1.398376464843750000e+00 0.000000000000000000e+00 5.882352963089942932e-02 2.547229736328125000e+03 3.541787147521972656e+00 3.000000000000000000e+00 7.976114654541015625e+01 4.575000000000000000e+01 5.675000000000000000e+01
3.200000000000000000e+01 5.748000000000000682e+02 3.226628417968750000e+02 1.312225341796875000e+00 0.000000000000000000e+00 5.294117927551269531e-01 2.540417480468750000e+03 3.547805070877075195e+00 3.000000000000000000e+00 1.150281448364257812e+02 4.625000000000000000e+01 5.675000000000000000e+01
2.800000000000000000e+01 5.790000000000004547e+02 3.181350708007812500e+02 1.226043701171875000e+00 0.000000000000000000e+00 5.294117927551269531e-01 2.533604980468750000e+03 3.547938108444213867e+00 3.000000000000000000e+00 1.158092193603515625e+02 4.675000000000000000e+01 5.675000000000000000e+01
5.000000000000000000e+01 5.770230769230769283e+02 3.162240905761718750e+02 1.184112548828125000e+00 0.000000000000000000e+00 0.000000000000000000e+00 2.532957031250000000e+03 3.263643264770507812e+00 4.000000000000000000e+00 8.642375946044921875e+01 4.725000000000000000e+01 5.675000000000000000e+01
6.100000000000000000e+01 5.833230769230767692e+02 3.149419555664062500e+02 1.156921386718750000e+00 0.000000000000000000e+00 2.941176593303680420e-01 2.534364013671875000e+03 3.093884706497192383e+00 4.000000000000000000e+00 1.032121963500976562e+02 4.775000000000000000e+01 5.675000000000000000e+01
2.000000000000000000e+00 5.684307692307692150e+02 3.031507263183593750e+02 1.134490966796875000e+00 0.000000000000000000e+00 2.941176593303680420e-01 2.517114013671875000e+03 2.487710714340209961e+00 1.000000000000000000e+00 1.282048187255859375e+02 5.175000000000000000e+01 5.675000000000000000e+01
1.300000000000000000e+01 5.685384615384612061e+02 2.813457946777343750e+02 8.930664062500000000e-01 0.000000000000000000e+00 0.000000000000000000e+00 2.434491699218750000e+03 3.097010612487792969e+00 1.000000000000000000e+00 1.018806228637695312e+02 5.375000000000000000e+01 5.675000000000000000e+01
5.500000000000000000e+01 5.681769230769231172e+02 2.812767028808593750e+02 7.998046875000000000e-01 0.000000000000000000e+00 0.000000000000000000e+00 2.408420654296875000e+03 3.450668334960937500e+00 4.000000000000000000e+00 1.296864624023437500e+02 5.425000000000000000e+01 5.675000000000000000e+01
4.100000000000000000e+01 5.815384615384614335e+02 2.852249755859375000e+02 4.978637695312500000e-01 0.000000000000000000e+00 0.000000000000000000e+00 2.354648681640625000e+03 3.408915758132934570e+00 3.000000000000000000e+00 2.194896697998046875e+02 5.525000000000000000e+01 5.675000000000000000e+01
3.200000000000000000e+01 6.105307692307691241e+02 3.104848327636718750e+02 1.794433593750000000e-01 0.000000000000000000e+00 0.000000000000000000e+00 2.300643798828125000e+03 3.367198467254638672e+00 3.000000000000000000e+00 2.514334716796875000e+02 5.625000000000000000e+01 5.675000000000000000e+01
1.000000000000000000e+01 6.140615384615382482e+02 3.114790344238281250e+02 6.854248046875000000e-02 0.000000000000000000e+00 0.000000000000000000e+00 2.287507080078125000e+03 3.339667081832885742e+00 1.000000000000000000e+00 2.002566528320312500e+02 5.675000000000000000e+01 5.675000000000000000e+01
1.700000000000000000e+01 6.252538461538463253e+02 3.162275390625000000e+02 -4.235839843750000000e-02 0.000000000000000000e+00 1.058823585510253906e+00 2.274370117187500000e+03 3.290339946746826172e+00 1.000000000000000000e+00 3.400082397460937500e+02 5.725000000000000000e+01 5.675000000000000000e+01
1.100000000000000000e+01 6.210307692307692378e+02 3.252105712890625000e+02 -1.532592773437500000e-01 0.000000000000000000e+00 8.235294222831726074e-01 2.261233154296875000e+03 3.266668319702148438e+00 1.000000000000000000e+00 2.728494567871093750e+02 5.775000000000000000e+01 5.675000000000000000e+01
3.200000000000000000e+01 6.305307692307694651e+02 3.341448974609375000e+02 -2.370300292968750000e-01 0.000000000000000000e+00 2.941176593303680420e-01 2.254027099609375000e+03 2.298339843750000000e+00 3.000000000000000000e+00 2.895123596191406250e+02 5.825000000000000000e+01 5.675000000000000000e+01
5.400000000000000000e+01 6.463153846153846871e+02 3.237856140136718750e+02 -2.418518066406250000e-01 0.000000000000000000e+00 5.882352963089942932e-02 2.275198974609375000e+03 2.063480615615844727e+00 4.000000000000000000e+00 4.692001647949218750e+02 5.925000000000000000e+01 5.675000000000000000e+01
6.300000000000000000e+01 6.323999999999998636e+02 3.054267272949218750e+02 -2.442932128906250000e-01 0.000000000000000000e+00 0.000000000000000000e+00 2.285784912109375000e+03 9.609450101852416992e-01 4.000000000000000000e+00 4.231441955566406250e+02 5.975000000000000000e+01 5.675000000000000000e+01
5.800000000000000000e+01 6.074769230769229580e+02 2.888665161132812500e+02 -1.986083984375000000e-01 0.000000000000000000e+00 0.000000000000000000e+00 2.305606201171875000e+03 1.605364084243774414e+00 4.000000000000000000e+00 3.243153991699218750e+02 6.025000000000000000e+01 5.675000000000000000e+01
4.200000000000000000e+01 5.330769230769229807e+02 2.751593017578125000e+02 -1.116943359375000000e-02 0.000000000000000000e+00 0.000000000000000000e+00 2.363719482421875000e+03 2.114182949066162109e+00 3.000000000000000000e+00 2.454272613525390625e+02 6.125000000000000000e+01 5.675000000000000000e+01
3.700000000000000000e+01 5.236461538461536520e+02 2.683359985351562500e+02 8.258056640625000000e-02 0.000000000000000000e+00 2.352941185235977173e-01 2.392776123046875000e+03 2.163719654083251953e+00 3.000000000000000000e+00 2.091271362304687500e+02 6.175000000000000000e+01 5.675000000000000000e+01
4.400000000000000000e+01 5.167769230769229125e+02 2.582245178222656250e+02 1.641235351562500000e-01 0.000000000000000000e+00 8.235294222831726074e-01 2.416334472656250000e+03 2.417433500289916992e+00 3.000000000000000000e+00 1.389062957763671875e+02 6.225000000000000000e+01 5.675000000000000000e+01
1.200000000000000000e+01 5.119846153846156085e+02 2.518952636718750000e+02 2.416076660156250000e-01 0.000000000000000000e+00 8.235294222831726074e-01 2.438060302734375000e+03 3.390396833419799805e+00 1.000000000000000000e+00 1.242617416381835938e+02 6.275000000000000000e+01 5.675000000000000000e+01
5.300000000000000000e+01 5.083384615384617291e+02 2.507869567871093750e+02 3.190917968750000000e-01 0.000000000000000000e+00 8.823529481887817383e-01 2.459785888671875000e+03 3.387668848037719727e+00 4.000000000000000000e+00 1.419373168945312500e+02 6.325000000000000000e+01 5.675000000000000000e+01
4.000000000000000000e+01 5.102076923076922412e+02 2.498737182617187500e+02 3.966064453125000000e-01 0.000000000000000000e+00 0.000000000000000000e+00 2.481511474609375000e+03 3.384619474411010742e+00 3.000000000000000000e+00 1.203241500854492188e+02 6.375000000000000000e+01 5.675000000000000000e+01
5.700000000000000000e+01 4.953307692307692491e+02 2.471450805664062500e+02 3.788757324218750000e-01 0.000000000000000000e+00 2.941176593303680420e-01 2.489664306640625000e+03 3.380324602127075195e+00 4.000000000000000000e+00 1.054941329956054688e+02 6.425000000000000000e+01 5.675000000000000000e+01
5.900000000000000000e+01 4.859846153846152106e+02 2.435000610351562500e+02 3.611450195312500000e-01 0.000000000000000000e+00 3.529411852359771729e-01 2.497817138671875000e+03 3.376887083053588867e+00 4.000000000000000000e+00 1.171071853637695312e+02 6.475000000000000000e+01 5.675000000000000000e+01
5.700000000000000000e+01 4.814230769230768487e+02 2.400029907226562500e+02 3.433837890625000000e-01 0.000000000000000000e+00 8.235294222831726074e-01 2.505969970703125000e+03 3.374715566635131836e+00 4.000000000000000000e+00 1.196733627319335938e+02 6.525000000000000000e+01 5.675000000000000000e+01
1.700000000000000000e+01 4.621461538461536520e+02 2.360114288330078125e+02 3.070068359375000000e-01 0.000000000000000000e+00 7.058823704719543457e-01 2.510228027343750000e+03 3.386422872543334961e+00 1.000000000000000000e+00 7.920980072021484375e+01 6.575000000000000000e+01 5.675000000000000000e+01
5.700000000000000000e+01 4.528000000000001251e+02 2.375877990722656250e+02 1.221923828125000000e-01 0.000000000000000000e+00 7.647058963775634766e-01 2.495374755859375000e+03 3.365617275238037109e+00 4.000000000000000000e+00 8.640583038330078125e+01 6.675000000000000000e+01 5.675000000000000000e+01
4.800000000000000000e+01 4.534076923076923435e+02 2.434563751220703125e+02 2.981567382812500000e-02 0.000000000000000000e+00 0.000000000000000000e+00 2.487948242187500000e+03 3.352227210998535156e+00 4.000000000000000000e+00 1.256984100341796875e+02 6.725000000000000000e+01 5.675000000000000000e+01
2.900000000000000000e+01 4.470461538461539703e+02 2.420031585693359375e+02 -5.148315429687500000e-02 0.000000000000000000e+00 7.058823704719543457e-01 2.480483154296875000e+03 3.347429513931274414e+00 3.000000000000000000e+00 1.351704254150390625e+02 6.775000000000000000e+01 5.675000000000000000e+01
4.600000000000000000e+01 1.727446153846153493e+03 5.912888793945312500e+02 7.917236328125000000e+00 0.000000000000000000e+00 0.000000000000000000e+00 3.199693115234375000e+03 3.166971921920776367e+00 4.000000000000000000e+00 4.560382385253906250e+02 -4.750000000000000000e+00 5.725000000000000000e+01
2.000000000000000000e+01 1.350784615384616018e+03 5.495457153320312500e+02 7.731079101562500000e+00 0.000000000000000000e+00 0.000000000000000000e+00 3.166032470703125000e+03 3.190155744552612305e+00 3.000000000000000000e+00 6.028008422851562500e+02 -4.250000000000000000e+00 5.725000000000000000e+01
4.500000000000000000e+01 1.117746153846154357e+03 4.633446960449218750e+02 7.544921875000000000e+00 0.000000000000000000e+00 2.941176593303680420e-01 3.132372070312500000e+03 3.174702644348144531e+00 4.000000000000000000e+00 2.386481018066406250e+02 -3.750000000000000000e+00 5.725000000000000000e+01
1.400000000000000000e+01 1.100807692307692378e+03 4.033759155273437500e+02 7.917175292968750000e+00 0.000000000000000000e+00 0.000000000000000000e+00 3.205393554687500000e+03 3.232218503952026367e+00 1.000000000000000000e+00 5.822686157226562500e+02 -3.250000000000000000e+00 5.725000000000000000e+01
2.800000000000000000e+01 1.069023076923077497e+03 3.843417663574218750e+02 8.289398193359375000e+00 0.000000000000000000e+00 0.000000000000000000e+00 3.278415039062500000e+03 3.406359195709228516e+00 3.000000000000000000e+00 2.227668304443359375e+02 -2.750000000000000000e+00 5.725000000000000000e+01
6.100000000000000000e+01 9.010461538461541977e+02 5.158928833007812500e+02 6.884887695312500000e+00 0.000000000000000000e+00 0.000000000000000000e+00 3.203424072265625000e+03 2.219377517700195312e+00 4.000000000000000000e+00 1.629482727050781250e+02 1.325000000000000000e+01 5.725000000000000000e+01
4.100000000000000000e+01 8.935769230769227534e+02 4.791905517578125000e+02 6.943756103515625000e+00 0.000000000000000000e+00 0.000000000000000000e+00 3.210125976562500000e+03 2.190520048141479492e+00 3.000000000000000000e+00 1.827915802001953125e+02 1.375000000000000000e+01 5.725000000000000000e+01
2.300000000000000000e+01 8.414307692307692150e+02 4.173296813964843750e+02 7.002593994140625000e+00 0.000000000000000000e+00 0.000000000000000000e+00 3.216827880859375000e+03 2.172127008438110352e+00 3.000000000000000000e+00 1.931913909912109375e+02 1.425000000000000000e+01 5.725000000000000000e+01
5.900000000000000000e+01 8.006153846153843006e+02 3.747109985351562500e+02 7.061462402343750000e+00 0.000000000000000000e+00 0.000000000000000000e+00 3.223530029296875000e+03 2.166427135467529297e+00 4.000000000000000000e+00 2.316350555419921875e+02 1.475000000000000000e+01 5.725000000000000000e+01
5.100000000000000000e+01 7.375384615384615472e+02 3.437372741699218750e+02 7.230987548828125000e+00 0.000000000000000000e+00 0.000000000000000000e+00 3.221989257812500000e+03 2.175779581069946289e+00 4.000000000000000000e+00 2.729427490234375000e+02 1.525000000000000000e+01 5.725000000000000000e+01
6.500000000000000000e+01 6.636999999999997044e+02 3.269329833984375000e+02 7.511169433593750000e+00 0.000000000000000000e+00 0.000000000000000000e+00 3.212206054687500000e+03 2.205031156539916992e+00 4.000000000000000000e+00 1.524174499511718750e+02 1.575000000000000000e+01 5.725000000000000000e+01
5.200000000000000000e+01 7.140153846153849599e+02 3.336515197753906250e+02 6.656219482421875000e+00 0.000000000000000000e+00 2.941176593303680420e-01 2.924702392578125000e+03 3.499300003051757812e+00 4.000000000000000000e+00 2.267534065246582031e+01 2.175000000000000000e+01 5.725000000000000000e+01
5.800000000000000000e+01 6.827230769230766327e+02 3.047343750000000000e+02 6.235443115234375000e+00 0.000000000000000000e+00 0.000000000000000000e+00 2.876148437500000000e+03 3.469864368438720703e+00 4.000000000000000000e+00 3.572573471069335938e+01 2.225000000000000000e+01 5.725000000000000000e+01
4.400000000000000000e+01 6.992076923076922412e+02 3.147794189453125000e+02 4.592041015625000000e+00 0.000000000000000000e+00 0.000000000000000000e+00 2.820497558593750000e+03 3.063303947448730469e+00 3.000000000000000000e+00 5.865323257446289062e+01 2.475000000000000000e+01 5.725000000000000000e+01
2.500000000000000000e+01 7.558923076923080089e+02 3.180526123046875000e+02 4.133300781250000000e+00 0.000000000000000000e+00 0.000000000000000000e+00 2.806283447265625000e+03 3.382932424545288086e+00 3.000000000000000000e+00 2.098515777587890625e+02 2.575000000000000000e+01 5.725000000000000000e+01
5.100000000000000000e+01 6.926076923076921048e+02 3.558192138671875000e+02 3.756835937500000000e+00 0.000000000000000000e+00 0.000000000000000000e+00 2.803591552734375000e+03 3.397406101226806641e+00 4.000000000000000000e+00 1.287908325195312500e+02 2.725000000000000000e+01 5.725000000000000000e+01
4.100000000000000000e+01 6.228384615384615017e+02 3.620934448242187500e+02 3.548767089843750000e+00 0.000000000000000000e+00 1.176470637321472168e+00 2.798829589843750000e+03 3.440667867660522461e+00 3.000000000000000000e+00 8.288832092285156250e+01 2.875000000000000000e+01 5.725000000000000000e+01
5.200000000000000000e+01 6.700384615384615472e+02 3.652510070800781250e+02 3.485260009765625000e+00 0.000000000000000000e+00 0.000000000000000000e+00 2.791929443359375000e+03 3.417587518692016602e+00 4.000000000000000000e+00 1.359833221435546875e+02 2.925000000000000000e+01 5.725000000000000000e+01
3.200000000000000000e+01 6.511615384615383846e+02 3.616978759765625000e+02 3.421752929687500000e+00 0.000000000000000000e+00 0.000000000000000000e+00 2.785029296875000000e+03 3.420515298843383789e+00 3.000000000000000000e+00 9.696217346191406250e+01 2.975000000000000000e+01 5.725000000000000000e+01
2.400000000000000000e+01 6.689615384615384528e+02 3.539636230468750000e+02 3.080993652343750000e+00 0.000000000000000000e+00 0.000000000000000000e+00 2.709837890625000000e+03 3.409824848175048828e+00 3.000000000000000000e+00 7.934889984130859375e+01 3.125000000000000000e+01 5.725000000000000000e+01
6.000000000000000000e+01 6.930846153846154039e+02 3.603147888183593750e+02 2.957366943359375000e+00 0.000000000000000000e+00 0.000000000000000000e+00 2.681141357421875000e+03 3.382931470870971680e+00 4.000000000000000000e+00 1.019363479614257812e+02 3.175000000000000000e+01 5.725000000000000000e+01
6.000000000000000000e+01 7.554307692307694424e+02 3.698692932128906250e+02 2.794342041015625000e+00 0.000000000000000000e+00 0.000000000000000000e+00 2.648288085937500000e+03 3.339412450790405273e+00 4.000000000000000000e+00 2.415124816894531250e+02 3.225000000000000000e+01 5.725000000000000000e+01
6.100000000000000000e+01 7.901153846153846416e+02 3.791062622070312500e+02 2.442047119140625000e+00 0.000000000000000000e+00 0.000000000000000000e+00 2.579810546875000000e+03 3.297588109970092773e+00 4.000000000000000000e+00 2.276143798828125000e+02 3.325000000000000000e+01 5.725000000000000000e+01
6.300000000000000000e+01 7.972000000000002728e+02 3.787138977050781250e+02 2.265869140625000000e+00 0.000000000000000000e+00 4.705882370471954346e-01 2.545571777343750000e+03 3.298094272613525391e+00 4.000000000000000000e+00 2.623057250976562500e+02 3.375000000000000000e+01 5.725000000000000000e+01
8.000000000000000000e+00 7.765538461538461661e+02 3.758628540039062500e+02 2.178039550781250000e+00 0.000000000000000000e+00 0.000000000000000000e+00 2.537931640625000000e+03 3.316701650619506836e+00 1.000000000000000000e+00 2.350426940917968750e+02 3.425000000000000000e+01 5.725000000000000000e+01
1.200000000000000000e+01 7.237846153846151083e+02 3.666572265625000000e+02 2.002410888671875000e+00 0.000000000000000000e+00 5.882352963089942932e-02 2.522651367187500000e+03 3.360651493072509766e+00 1.000000000000000000e+00 2.018808898925781250e+02 3.525000000000000000e+01 5.725000000000000000e+01
5.700000000000000000e+01 6.971076923076925596e+02 3.646696777343750000e+02 1.927795410156250000e+00 0.000000000000000000e+00 0.000000000000000000e+00 2.516698730468750000e+03 3.376883983612060547e+00 4.000000000000000000e+00 1.669712371826171875e+02 3.575000000000000000e+01 5.725000000000000000e+01
5.400000000000000000e+01 6.903846153846152447e+02 3.641549377441406250e+02 1.892761230468750000e+00 0.000000000000000000e+00 0.000000000000000000e+00 2.515808837890625000e+03 3.386436462402343750e+00 4.000000000000000000e+00 1.516607818603515625e+02 3.625000000000000000e+01 5.725000000000000000e+01
5.800000000000000000e+01 6.490384615384616609e+02 3.553366088867187500e+02 1.822692871093750000e+00 0.000000000000000000e+00 0.000000000000000000e+00 2.514029541015625000e+03 3.418303251266479492e+00 4.000000000000000000e+00 1.322870178222656250e+02 3.725000000000000000e+01 5.725000000000000000e+01
5.900000000000000000e+01 6.299615384615383391e+02 3.322337646484375000e+02 1.869201660156250000e+00 0.000000000000000000e+00 0.000000000000000000e+00 2.532862060546875000e+03 3.422316551208496094e+00 4.000000000000000000e+00 1.479734191894531250e+02 3.825000000000000000e+01 5.725000000000000000e+01
1.300000000000000000e+01 5.681923076923073950e+02 3.131720275878906250e+02 1.986175537109375000e+00 0.000000000000000000e+00 0.000000000000000000e+00 2.568655761718750000e+03 3.456490039825439453e+00 1.000000000000000000e+00 1.376541595458984375e+02 4.025000000000000000e+01 5.725000000000000000e+01
4.800000000000000000e+01 5.710538461538463935e+02 3.145120239257812500e+02 1.998138427734375000e+00 0.000000000000000000e+00 6.470588445663452148e-01 2.572585693359375000e+03 3.462045669555664062e+00 4.000000000000000000e+00 1.350052947998046875e+02 4.075000000000000000e+01 5.725000000000000000e+01
4.500000000000000000e+01 5.847692307692304894e+02 3.137665710449218750e+02 2.010131835937500000e+00 0.000000000000000000e+00 0.000000000000000000e+00 2.576515869140625000e+03 3.457113027572631836e+00 4.000000000000000000e+00 1.263317031860351562e+02 4.125000000000000000e+01 5.725000000000000000e+01
1.000000000000000000e+01 5.996923076923077360e+02 3.119278869628906250e+02 1.948638916015625000e+00 0.000000000000000000e+00 3.529411852359771729e-01 2.570015625000000000e+03 3.447099447250366211e+00 1.000000000000000000e+00 1.500924987792968750e+02 4.175000000000000000e+01 5.725000000000000000e+01
2.600000000000000000e+01 5.999846153846154948e+02 3.168895263671875000e+02 1.825622558593750000e+00 0.000000000000000000e+00 2.941176593303680420e-01 2.557015380859375000e+03 3.446989059448242188e+00 3.000000000000000000e+00 1.174494476318359375e+02 4.275000000000000000e+01 5.725000000000000000e+01
5.300000000000000000e+01 6.038769230769231626e+02 3.283021240234375000e+02 1.621246337890625000e+00 0.000000000000000000e+00 0.000000000000000000e+00 2.535524169921875000e+03 3.446308851242065430e+00 4.000000000000000000e+00 1.602927246093750000e+02 4.375000000000000000e+01 5.725000000000000000e+01
4.700000000000000000e+01 6.013230769230765418e+02 3.400587768554687500e+02 1.368103027343750000e+00 0.000000000000000000e+00 0.000000000000000000e+00 2.508938476562500000e+03 3.464225292205810547e+00 4.000000000000000000e+00 1.490554504394531250e+02 4.475000000000000000e+01 5.725000000000000000e+01
3.900000000000000000e+01 6.105153846153843915e+02 3.385697631835937500e+02 1.266815185546875000e+00 0.000000000000000000e+00 5.882352963089942932e-02 2.498815185546875000e+03 3.473379611968994141e+00 3.000000000000000000e+00 1.101813888549804688e+02 4.525000000000000000e+01 5.725000000000000000e+01
2.600000000000000000e+01 6.012923076923075314e+02 3.324091491699218750e+02 1.190826416015625000e+00 0.000000000000000000e+00 0.000000000000000000e+00 2.491860839843750000e+03 3.477917909622192383e+00 3.000000000000000000e+00 1.436983795166015625e+02 4.575000000000000000e+01 5.725000000000000000e+01
7.000000000000000000e+00 5.986384615384615699e+02 3.223764343261718750e+02 1.114837646484375000e+00 0.000000000000000000e+00 2.352941185235977173e-01 2.484906494140625000e+03 3.482575178146362305e+00 1.000000000000000000e+00 1.281831054687500000e+02 4.625000000000000000e+01 5.725000000000000000e+01
6.400000000000000000e+01 5.943000000000000682e+02 3.154812622070312500e+02 1.038879394531250000e+00 0.000000000000000000e+00 0.000000000000000000e+00 2.477952392578125000e+03 3.489226341247558594e+00 4.000000000000000000e+00 1.470533752441406250e+02 4.675000000000000000e+01 5.725000000000000000e+01
1.500000000000000000e+01 6.150538461538460524e+02 3.171262817382812500e+02 9.819946289062500000e-01 0.000000000000000000e+00 0.000000000000000000e+00 2.477015380859375000e+03 3.457950115203857422e+00 1.000000000000000000e+00 1.436899566650390625e+02 4.775000000000000000e+01 5.725000000000000000e+01
2.200000000000000000e+01 6.148538461538460069e+02 3.466260681152343750e+02 9.605102539062500000e-01 0.000000000000000000e+00 5.294117927551269531e-01 2.480577636718750000e+03 3.490737915039062500e+00 3.000000000000000000e+00 1.347823638916015625e+02 4.925000000000000000e+01 5.725000000000000000e+01
6.000000000000000000e+01 5.969769230769231854e+02 3.523461914062500000e+02 1.004089355468750000e+00 0.000000000000000000e+00 0.000000000000000000e+00 2.485869384765625000e+03 2.244364023208618164e+00 4.000000000000000000e+00 1.197862854003906250e+02 5.025000000000000000e+01 5.725000000000000000e+01
6.300000000000000000e+01 5.849461538461538339e+02 3.477511901855468750e+02 1.017486572265625000e+00 0.000000000000000000e+00 0.000000000000000000e+00 2.485374755859375000e+03 2.241063356399536133e+00 4.000000000000000000e+00 1.383328247070312500e+02 5.075000000000000000e+01 5.725000000000000000e+01
6.200000000000000000e+01 5.742461538461536747e+02 3.302031555175781250e+02 1.005798339843750000e+00 0.000000000000000000e+00 0.000000000000000000e+00 2.475459228515625000e+03 2.231032133102416992e+00 4.000000000000000000e+00 1.216437454223632812e+02 5.125000000000000000e+01 5.725000000000000000e+01
1.500000000000000000e+01 5.876153846153845279e+02 2.765876464843750000e+02 9.324035644531250000e-01 0.000000000000000000e+00 0.000000000000000000e+00 2.439030273437500000e+03 2.183547019958496094e+00 1.000000000000000000e+00 2.483314056396484375e+02 5.275000000000000000e+01 5.725000000000000000e+01
1.100000000000000000e+01 5.812923076923076451e+02 2.810847778320312500e+02 8.441467285156250000e-01 0.000000000000000000e+00 0.000000000000000000e+00 2.415750000000000000e+03 2.430303335189819336e+00 1.000000000000000000e+00 1.977957153320312500e+02 5.325000000000000000e+01 5.725000000000000000e+01
4.400000000000000000e+01 6.054076923076920593e+02 2.962412109375000000e+02 5.206298828125000000e-01 0.000000000000000000e+00 2.941176593303680420e-01 2.343830566406250000e+03 3.385546445846557617e+00 3.000000000000000000e+00 1.746571807861328125e+02 5.475000000000000000e+01 5.725000000000000000e+01
5.000000000000000000e+01 6.416923076923078497e+02 3.198031311035156250e+02 2.087402343750000000e-02 0.000000000000000000e+00 0.000000000000000000e+00 2.265674560546875000e+03 3.324157953262329102e+00 4.000000000000000000e+00 2.298951873779296875e+02 5.625000000000000000e+01 5.725000000000000000e+01
9.000000000000000000e+00 6.460615384615385892e+02 3.361207275390625000e+02 -1.038513183593750000e-01 0.000000000000000000e+00 6.470588445663452148e-01 2.252398193359375000e+03 3.328237056732177734e+00 1.000000000000000000e+00 1.905286712646484375e+02 5.675000000000000000e+01 5.725000000000000000e+01
4.300000000000000000e+01 6.493230769230768828e+02 3.859973754882812500e+02 -3.532409667968750000e-01 0.000000000000000000e+00 0.000000000000000000e+00 2.225845947265625000e+03 2.657643556594848633e+00 3.000000000000000000e+00 2.488628234863281250e+02 5.775000000000000000e+01 5.725000000000000000e+01
6.500000000000000000e+01 6.540461538461537430e+02 4.016372070312500000e+02 -4.509582519531250000e-01 0.000000000000000000e+00 0.000000000000000000e+00 2.218054931640625000e+03 2.089505672454833984e+00 4.000000000000000000e+00 2.849791259765625000e+02 5.825000000000000000e+01 5.725000000000000000e+01
4.800000000000000000e+01 6.516923076923075087e+02 3.497123718261718750e+02 -4.843444824218750000e-01 0.000000000000000000e+00 0.000000000000000000e+00 2.235384277343750000e+03 8.940400481224060059e-01 4.000000000000000000e+00 3.147374267578125000e+02 5.925000000000000000e+01 5.725000000000000000e+01
6.100000000000000000e+01 6.362999999999998408e+02 3.065292968750000000e+02 -5.010375976562500000e-01 0.000000000000000000e+00 2.352941185235977173e-01 2.244048828125000000e+03 1.627591371536254883e+00 4.000000000000000000e+00 3.750379333496093750e+02 5.975000000000000000e+01 5.725000000000000000e+01
6.800000000000000000e+01 6.032000000000000455e+02 2.810648498535156250e+02 -4.692382812500000000e-01 0.000000000000000000e+00 7.058823704719543457e-01 2.260893066406250000e+03 2.093846797943115234e+00 4.000000000000000000e+00 3.042055664062500000e+02 6.025000000000000000e+01 5.725000000000000000e+01
6.500000000000000000e+01 5.765923076923073722e+02 2.716993103027343750e+02 -3.889770507812500000e-01 0.000000000000000000e+00 0.000000000000000000e+00 2.285916748046875000e+03 2.072839260101318359e+00 4.000000000000000000e+00 2.612136535644531250e+02 6.075000000000000000e+01 5.725000000000000000e+01
6.300000000000000000e+01 5.494769230769228443e+02 2.671820068359375000e+02 -3.087158203125000000e-01 0.000000000000000000e+00 0.000000000000000000e+00 2.310940429687500000e+03 1.314306855201721191e+00 4.000000000000000000e+00 2.287530975341796875e+02 6.125000000000000000e+01 5.725000000000000000e+01
6.100000000000000000e+01 5.369461538461538339e+02 2.642530822753906250e+02 -2.284545898437500000e-01 0.000000000000000000e+00 5.882353186607360840e-01 2.335964111328125000e+03 1.035315752029418945e+00 4.000000000000000000e+00 2.165928039550781250e+02 6.175000000000000000e+01 5.725000000000000000e+01
6.000000000000000000e+01 5.251230769230768374e+02 2.609636230468750000e+02 -1.496582031250000000e-01 0.000000000000000000e+00 0.000000000000000000e+00 2.357273681640625000e+03 1.597427129745483398e+00 4.000000000000000000e+00 1.457760772705078125e+02 6.225000000000000000e+01 5.725000000000000000e+01
5.000000000000000000e+01 5.212692307692311715e+02 2.601380310058593750e+02 -7.131958007812500000e-02 0.000000000000000000e+00 1.235294103622436523e+00 2.377345214843750000e+03 2.598324298858642578e+00 4.000000000000000000e+00 1.424113464355468750e+02 6.275000000000000000e+01 5.725000000000000000e+01
4.400000000000000000e+01 5.220076923076923094e+02 2.618370666503906250e+02 7.019042968750000000e-03 0.000000000000000000e+00 2.941176593303680420e-01 2.397416992187500000e+03 2.153646469116210938e+00 3.000000000000000000e+00 1.404690399169921875e+02 6.325000000000000000e+01 5.725000000000000000e+01
4.200000000000000000e+01 5.248230769230768828e+02 2.633892822265625000e+02 8.532714843750000000e-02 0.000000000000000000e+00 5.294117927551269531e-01 2.417488525390625000e+03 3.138263702392578125e+00 3.000000000000000000e+00 1.413553161621093750e+02 6.375000000000000000e+01 5.725000000000000000e+01
3.400000000000000000e+01 5.053384615384613880e+02 2.615537719726562500e+02 7.614135742187500000e-02 0.000000000000000000e+00 2.941176593303680420e-01 2.425053710937500000e+03 3.370022058486938477e+00 3.000000000000000000e+00 1.293414154052734375e+02 6.425000000000000000e+01 5.725000000000000000e+01
5.500000000000000000e+01 4.912230769230769738e+02 2.573635864257812500e+02 6.695556640625000000e-02 0.000000000000000000e+00 6.470588445663452148e-01 2.432619140625000000e+03 3.375091791152954102e+00 4.000000000000000000e+00 1.195590972900390625e+02 6.475000000000000000e+01 5.725000000000000000e+01
2.400000000000000000e+01 4.860461538461538566e+02 2.541771392822265625e+02 5.776977539062500000e-02 0.000000000000000000e+00 5.882353186607360840e-01 2.440184326171875000e+03 3.370682239532470703e+00 3.000000000000000000e+00 5.650275039672851562e+01 6.525000000000000000e+01 5.725000000000000000e+01
5.300000000000000000e+01 4.914769230769227306e+02 2.541778259277343750e+02 2.746582031250000000e-02 0.000000000000000000e+00 7.058823704719543457e-01 2.443991699218750000e+03 3.364838123321533203e+00 4.000000000000000000e+00 5.584343719482421875e+01 6.575000000000000000e+01 5.725000000000000000e+01
1.900000000000000000e+01 4.890923076923074859e+02 2.577051086425781250e+02 -6.610107421875000000e-02 0.000000000000000000e+00 3.529411852359771729e-01 2.436524902343750000e+03 3.369555950164794922e+00 1.000000000000000000e+00 6.048430633544921875e+01 6.625000000000000000e+01 5.725000000000000000e+01
6.000000000000000000e+00 4.857923076923076451e+02 2.644172973632812500e+02 -1.596679687500000000e-01 0.000000000000000000e+00 2.941176593303680420e-01 2.429058105468750000e+03 3.363686800003051758e+00 1.000000000000000000e+00 5.038246917724609375e+01 6.675000000000000000e+01 5.725000000000000000e+01
3.200000000000000000e+01 4.821000000000001364e+02 2.650291137695312500e+02 -2.532348632812500000e-01 0.000000000000000000e+00 9.411764740943908691e-01 2.421591552734375000e+03 2.959089279174804688e+00 3.000000000000000000e+00 5.771920394897460938e+01 6.725000000000000000e+01 5.725000000000000000e+01
2.600000000000000000e+01 2.270176923076922321e+03 5.907687377929687500e+02 8.345916748046875000e+00 0.000000000000000000e+00 0.000000000000000000e+00 3.258337158203125000e+03 3.402065753936767578e+00 3.000000000000000000e+00 3.520024414062500000e+02 -5.250000000000000000e+00 5.775000000000000000e+01
4.000000000000000000e+01 1.752269230769230944e+03 5.813890380859375000e+02 8.100311279296875000e+00 0.000000000000000000e+00 0.000000000000000000e+00 3.213567382812500000e+03 3.293691158294677734e+00 3.000000000000000000e+00 3.792850036621093750e+02 -4.750000000000000000e+00 5.775000000000000000e+01
6.000000000000000000e+01 8.976923076923080771e+02 4.581396484375000000e+02 6.519409179687500000e+00 0.000000000000000000e+00 0.000000000000000000e+00 3.037287109375000000e+03 2.214523792266845703e+00 4.000000000000000000e+00 2.141075897216796875e+02 1.275000000000000000e+01 5.775000000000000000e+01
5.900000000000000000e+01 8.729307692307688740e+02 4.651949157714843750e+02 6.463134765625000000e+00 0.000000000000000000e+00 0.000000000000000000e+00 3.064418457031250000e+03 2.152083635330200195e+00 4.000000000000000000e+00 2.871552429199218750e+02 1.375000000000000000e+01 5.775000000000000000e+01
3.300000000000000000e+01 8.104692307692313307e+02 4.305044860839843750e+02 6.581756591796875000e+00 0.000000000000000000e+00 0.000000000000000000e+00 3.085595214843750000e+03 2.142647266387939453e+00 3.000000000000000000e+00 2.009948272705078125e+02 1.425000000000000000e+01 5.775000000000000000e+01
2.900000000000000000e+01 8.110923076923074859e+02 3.846478881835937500e+02 6.700378417968750000e+00 0.000000000000000000e+00 0.000000000000000000e+00 3.106771972656250000e+03 2.138453722000122070e+00 3.000000000000000000e+00 2.609361572265625000e+02 1.475000000000000000e+01 5.775000000000000000e+01
4.200000000000000000e+01 7.466538461538459615e+02 3.498488464355468750e+02 6.934082031250000000e+00 0.000000000000000000e+00 0.000000000000000000e+00 3.123112548828125000e+03 2.154980897903442383e+00 3.000000000000000000e+00 2.547777862548828125e+02 1.525000000000000000e+01 5.775000000000000000e+01
5.500000000000000000e+01 6.896230769230769511e+02 3.445717468261718750e+02 7.282867431640625000e+00 0.000000000000000000e+00 0.000000000000000000e+00 3.134616943359375000e+03 2.192707538604736328e+00 4.000000000000000000e+00 1.382846832275390625e+02 1.575000000000000000e+01 5.775000000000000000e+01
5.200000000000000000e+01 6.311230769230770647e+02 3.278721008300781250e+02 7.631652832031250000e+00 0.000000000000000000e+00 0.000000000000000000e+00 3.146121337890625000e+03 2.226824045181274414e+00 4.000000000000000000e+00 9.987860107421875000e+01 1.625000000000000000e+01 5.775000000000000000e+01
5.700000000000000000e+01 7.218999999999996362e+02 3.269328002929687500e+02 4.194000244140625000e+00 0.000000000000000000e+00 0.000000000000000000e+00 2.793586181640625000e+03 3.414235591888427734e+00 4.000000000000000000e+00 6.547473907470703125e+01 2.575000000000000000e+01 5.775000000000000000e+01
4.900000000000000000e+01 7.046153846153845279e+02 3.438767395019531250e+02 3.949829101562500000e+00 0.000000000000000000e+00 0.000000000000000000e+00 2.788955322265625000e+03 3.401924610137939453e+00 4.000000000000000000e+00 6.987260437011718750e+01 2.625000000000000000e+01 5.775000000000000000e+01
2.500000000000000000e+01 7.110384615384615472e+02 3.431906127929687500e+02 3.881256103515625000e+00 0.000000000000000000e+00 0.000000000000000000e+00 2.794361328125000000e+03 3.373242855072021484e+00 3.000000000000000000e+00 8.252747344970703125e+01 2.675000000000000000e+01 5.775000000000000000e+01
1.000000000000000000e+01 6.439153846153847098e+02 3.756060791015625000e+02 3.625488281250000000e+00 0.000000000000000000e+00 4.705882370471954346e-01 2.805748535156250000e+03 3.415953159332275391e+00 1.000000000000000000e+00 6.017695617675781250e+01 2.875000000000000000e+01 5.775000000000000000e+01
1.300000000000000000e+01 6.500999999999997954e+02 3.747274475097656250e+02 3.571746826171875000e+00 0.000000000000000000e+00 7.647058963775634766e-01 2.802965332031250000e+03 3.409893035888671875e+00 1.000000000000000000e+00 6.002565383911132812e+01 2.925000000000000000e+01 5.775000000000000000e+01
6.200000000000000000e+01 6.508538461538460069e+02 3.704983215332031250e+02 3.518005371093750000e+00 0.000000000000000000e+00 4.117647111415863037e-01 2.800181884765625000e+03 2.919474124908447266e+00 4.000000000000000000e+00 8.742331695556640625e+01 2.975000000000000000e+01 5.775000000000000000e+01
5.700000000000000000e+01 6.499846153846156085e+02 3.629448852539062500e+02 3.425842285156250000e+00 0.000000000000000000e+00 4.705882370471954346e-01 2.783638427734375000e+03 3.372239828109741211e+00 4.000000000000000000e+00 8.827584838867187500e+01 3.025000000000000000e+01 5.775000000000000000e+01
5.800000000000000000e+01 6.575461538461536293e+02 3.546815490722656250e+02 3.295196533203125000e+00 0.000000000000000000e+00 2.941176593303680420e-01 2.753334472656250000e+03 3.422737598419189453e+00 4.000000000000000000e+00 9.180575561523437500e+01 3.075000000000000000e+01 5.775000000000000000e+01
5.900000000000000000e+01 6.562615384615385210e+02 3.529877014160156250e+02 3.164581298828125000e+00 0.000000000000000000e+00 6.470588445663452148e-01 2.723030517578125000e+03 3.420522212982177734e+00 4.000000000000000000e+00 6.484266662597656250e+01 3.125000000000000000e+01 5.775000000000000000e+01
2.200000000000000000e+01 6.617692307692304894e+02 3.561434020996093750e+02 3.033966064453125000e+00 0.000000000000000000e+00 0.000000000000000000e+00 2.692726562500000000e+03 3.414576530456542969e+00 3.000000000000000000e+00 3.799631500244140625e+01 3.175000000000000000e+01 5.775000000000000000e+01
2.600000000000000000e+01 6.917307692307692832e+02 3.639618835449218750e+02 2.849426269531250000e+00 0.000000000000000000e+00 2.352941185235977173e-01 2.653776123046875000e+03 3.381642580032348633e+00 3.000000000000000000e+00 6.247414779663085938e+01 3.225000000000000000e+01 5.775000000000000000e+01
5.100000000000000000e+01 7.530538461538461661e+02 3.705657653808593750e+02 2.646911621093750000e+00 0.000000000000000000e+00 0.000000000000000000e+00 2.611943603515625000e+03 3.329993009567260742e+00 4.000000000000000000e+00 2.173568115234375000e+02 3.275000000000000000e+01 5.775000000000000000e+01
5.300000000000000000e+01 7.850615384615385892e+02 3.745935363769531250e+02 2.444366455078125000e+00 0.000000000000000000e+00 0.000000000000000000e+00 2.570111083984375000e+03 3.292288541793823242e+00 4.000000000000000000e+00 2.304531555175781250e+02 3.325000000000000000e+01 5.775000000000000000e+01
5.000000000000000000e+01 7.365461538461534019e+02 3.695688476562500000e+02 2.010925292968750000e+00 0.000000000000000000e+00 0.000000000000000000e+00 2.505942871093750000e+03 3.306505441665649414e+00 4.000000000000000000e+00 1.700625000000000000e+02 3.475000000000000000e+01 5.775000000000000000e+01
1.500000000000000000e+01 6.468538461538460069e+02 3.422674255371093750e+02 1.549530029296875000e+00 0.000000000000000000e+00 2.941176593303680420e-01 2.460902099609375000e+03 3.385737657546997070e+00 1.000000000000000000e+00 1.473909759521484375e+02 3.775000000000000000e+01 5.775000000000000000e+01
6.000000000000000000e+00 6.238769230769231626e+02 3.354039001464843750e+02 1.560272216796875000e+00 0.000000000000000000e+00 0.000000000000000000e+00 2.469781250000000000e+03 3.393732547760009766e+00 1.000000000000000000e+00 1.281006164550781250e+02 3.825000000000000000e+01 5.775000000000000000e+01
5.300000000000000000e+01 6.047153846153848917e+02 3.312488098144531250e+02 1.571014404296875000e+00 0.000000000000000000e+00 5.294117927551269531e-01 2.478660156250000000e+03 3.392266273498535156e+00 4.000000000000000000e+00 1.247051696777343750e+02 3.875000000000000000e+01 5.775000000000000000e+01
7.000000000000000000e+00 5.816538461538460751e+02 3.267604370117187500e+02 1.581726074218750000e+00 0.000000000000000000e+00 8.235294222831726074e-01 2.487539062500000000e+03 3.393030166625976562e+00 1.000000000000000000e+00 1.318974151611328125e+02 3.925000000000000000e+01 5.775000000000000000e+01
6.800000000000000000e+01 5.700384615384614335e+02 3.099416503906250000e+02 1.638885498046875000e+00 0.000000000000000000e+00 5.294117927551269531e-01 2.504579101562500000e+03 3.430328845977783203e+00 4.000000000000000000e+00 1.366047210693359375e+02 4.125000000000000000e+01 5.775000000000000000e+01
1.300000000000000000e+01 5.658307692307688512e+02 3.086952819824218750e+02 1.598663330078125000e+00 0.000000000000000000e+00 0.000000000000000000e+00 2.501082763671875000e+03 3.421900033950805664e+00 1.000000000000000000e+00 1.700552673339843750e+02 4.175000000000000000e+01 5.775000000000000000e+01
1.600000000000000000e+01 5.757461538461537884e+02 3.120556030273437500e+02 1.558410644531250000e+00 0.000000000000000000e+00 0.000000000000000000e+00 2.497586425781250000e+03 3.410713911056518555e+00 1.000000000000000000e+00 1.271150054931640625e+02 4.225000000000000000e+01 5.775000000000000000e+01
6.700000000000000000e+01 5.707461538461537884e+02 3.159183044433593750e+02 1.518188476562500000e+00 0.000000000000000000e+00 2.941176593303680420e-01 2.494090087890625000e+03 3.407473802566528320e+00 4.000000000000000000e+00 1.263092575073242188e+02 4.275000000000000000e+01 5.775000000000000000e+01
5.600000000000000000e+01 5.661230769230771784e+02 3.194657287597656250e+02 1.460937500000000000e+00 0.000000000000000000e+00 5.882352963089942932e-02 2.488512207031250000e+03 3.405614852905273438e+00 4.000000000000000000e+00 1.064218368530273438e+02 4.325000000000000000e+01 5.775000000000000000e+01
3.700000000000000000e+01 5.726692307692309214e+02 3.242434082031250000e+02 1.352661132812500000e+00 0.000000000000000000e+00 0.000000000000000000e+00 2.476690429687500000e+03 1.826115846633911133e+00 3.000000000000000000e+00 9.234892272949218750e+01 4.375000000000000000e+01 5.775000000000000000e+01
6.200000000000000000e+01 5.584769230769229580e+02 3.309150390625000000e+02 1.244384765625000000e+00 0.000000000000000000e+00 0.000000000000000000e+00 2.464868652343750000e+03 2.027161121368408203e+00 4.000000000000000000e+00 1.279152526855468750e+02 4.425000000000000000e+01 5.775000000000000000e+01
6.500000000000000000e+01 5.755076923076926505e+02 3.356448669433593750e+02 1.136108398437500000e+00 0.000000000000000000e+00 0.000000000000000000e+00 2.453046875000000000e+03 3.420711994171142578e+00 4.000000000000000000e+00 1.610350646972656250e+02 4.475000000000000000e+01 5.775000000000000000e+01
4.000000000000000000e+01 5.970538461538460524e+02 3.357338562011718750e+02 1.049072265625000000e+00 0.000000000000000000e+00 0.000000000000000000e+00 2.443587890625000000e+03 3.424905300140380859e+00 3.000000000000000000e+00 1.282610778808593750e+02 4.525000000000000000e+01 5.775000000000000000e+01
4.300000000000000000e+01 6.089615384615383391e+02 3.291624450683593750e+02 9.832763671875000000e-01 0.000000000000000000e+00 0.000000000000000000e+00 2.436491699218750000e+03 3.430617094039916992e+00 3.000000000000000000e+00 9.935707092285156250e+01 4.575000000000000000e+01 5.775000000000000000e+01
6.000000000000000000e+01 6.178615384615383164e+02 3.112876892089843750e+02 8.516845703125000000e-01 0.000000000000000000e+00 0.000000000000000000e+00 2.422299804687500000e+03 3.326849937438964844e+00 4.000000000000000000e+00 1.463985290527343750e+02 4.675000000000000000e+01 5.775000000000000000e+01
6.000000000000000000e+00 6.204769230769229580e+02 3.124597167968750000e+02 8.231811523437500000e-01 0.000000000000000000e+00 5.294117927551269531e-01 2.420157714843750000e+03 3.312457084655761719e+00 1.000000000000000000e+00 1.323124542236328125e+02 4.725000000000000000e+01 5.775000000000000000e+01
4.700000000000000000e+01 6.257307692307692832e+02 3.197232971191406250e+02 8.070983886718750000e-01 0.000000000000000000e+00 0.000000000000000000e+00 2.419666992187500000e+03 2.790849447250366211e+00 4.000000000000000000e+00 1.159805221557617188e+02 4.775000000000000000e+01 5.775000000000000000e+01
9.000000000000000000e+00 6.323307692307690786e+02 3.340017700195312500e+02 7.910156250000000000e-01 0.000000000000000000e+00 2.352941185235977173e-01 2.419176025390625000e+03 2.633787393569946289e+00 1.000000000000000000e+00 1.229999618530273438e+02 4.825000000000000000e+01 5.775000000000000000e+01
3.500000000000000000e+01 6.345999999999999091e+02 3.601160278320312500e+02 8.066711425781250000e-01 0.000000000000000000e+00 0.000000000000000000e+00 2.422349365234375000e+03 3.448044300079345703e+00 3.000000000000000000e+00 1.847322387695312500e+02 4.925000000000000000e+01 5.775000000000000000e+01
5.000000000000000000e+00 6.139615384615383391e+02 3.612914123535156250e+02 8.701782226562500000e-01 0.000000000000000000e+00 2.941176593303680420e-01 2.429677490234375000e+03 3.436172008514404297e+00 1.000000000000000000e+00 9.710181427001953125e+01 5.025000000000000000e+01 5.775000000000000000e+01
1.400000000000000000e+01 5.933692307692307395e+02 2.558495330810546875e+02 8.357238769531250000e-01 0.000000000000000000e+00 0.000000000000000000e+00 2.405772705078125000e+03 2.612569332122802734e+00 1.000000000000000000e+00 2.134998321533203125e+02 5.225000000000000000e+01 5.775000000000000000e+01
9.000000000000000000e+00 6.012461538461540158e+02 2.476357116699218750e+02 7.851562500000000000e-01 0.000000000000000000e+00 8.235294222831726074e-01 2.391427490234375000e+03 2.156093358993530273e+00 1.000000000000000000e+00 2.128088531494140625e+02 5.275000000000000000e+01 5.775000000000000000e+01
6.500000000000000000e+01 6.053769230769231626e+02 2.583427429199218750e+02 7.019348144531250000e-01 0.000000000000000000e+00 8.235294222831726074e-01 2.370937744140625000e+03 2.146941184997558594e+00 4.000000000000000000e+00 1.948022613525390625e+02 5.325000000000000000e+01 5.775000000000000000e+01
2.600000000000000000e+01 6.189692307692308759e+02 2.753526306152343750e+02 6.187133789062500000e-01 0.000000000000000000e+00 4.705882370471954346e-01 2.350447998046875000e+03 2.139130592346191406e+00 3.000000000000000000e+00 2.148352050781250000e+02 5.375000000000000000e+01 5.775000000000000000e+01
3.900000000000000000e+01 6.317999999999999545e+02 2.916995849609375000e+02 5.354919433593750000e-01 0.000000000000000000e+00 0.000000000000000000e+00 2.329958496093750000e+03 3.083048820495605469e+00 3.000000000000000000e+00 2.110177307128906250e+02 5.425000000000000000e+01 5.775000000000000000e+01
6.000000000000000000e+01 6.390307692307693515e+02 3.037077636718750000e+02 3.841857910156250000e-01 0.000000000000000000e+00 0.000000000000000000e+00 2.306009765625000000e+03 2.896567583084106445e+00 4.000000000000000000e+00 2.098229064941406250e+02 5.475000000000000000e+01 5.775000000000000000e+01
5.000000000000000000e+01 6.477769230769232536e+02 3.139880676269531250e+02 2.102355957031250000e-01 0.000000000000000000e+00 7.058823704719543457e-01 2.280908203125000000e+03 2.704689502716064453e+00 4.000000000000000000e+00 1.595552673339843750e+02 5.525000000000000000e+01 5.775000000000000000e+01
6.300000000000000000e+01 6.597769230769231399e+02 3.223115539550781250e+02 3.625488281250000000e-02 0.000000000000000000e+00 0.000000000000000000e+00 2.255806640625000000e+03 2.957627534866333008e+00 4.000000000000000000e+00 2.332227630615234375e+02 5.575000000000000000e+01 5.775000000000000000e+01
6.100000000000000000e+01 6.669230769230767919e+02 3.296523437500000000e+02 -1.377258300781250000e-01 0.000000000000000000e+00 2.941176593303680420e-01 2.230705078125000000e+03 2.639303684234619141e+00 4.000000000000000000e+00 2.155249938964843750e+02 5.625000000000000000e+01 5.775000000000000000e+01
5.900000000000000000e+01 6.732384615384615927e+02 3.509396362304687500e+02 -2.762145996093750000e-01 0.000000000000000000e+00 0.000000000000000000e+00 2.217289550781250000e+03 2.153910160064697266e+00 4.000000000000000000e+00 1.708706817626953125e+02 5.675000000000000000e+01 5.775000000000000000e+01
6.200000000000000000e+01 6.710461538461537430e+02 4.082599487304687500e+02 -5.532226562500000000e-01 0.000000000000000000e+00 0.000000000000000000e+00 2.190458496093750000e+03 2.088843584060668945e+00 4.000000000000000000e+00 2.081649017333984375e+02 5.775000000000000000e+01 5.775000000000000000e+01
6.100000000000000000e+01 6.727769230769227988e+02 4.154465332031250000e+02 -6.648559570312500000e-01 0.000000000000000000e+00 0.000000000000000000e+00 2.182082763671875000e+03 2.071117639541625977e+00 4.000000000000000000e+00 3.684231262207031250e+02 5.825000000000000000e+01 5.775000000000000000e+01
6.600000000000000000e+01 6.763999999999998636e+02 3.912393188476562500e+02 -6.958312988281250000e-01 0.000000000000000000e+00 0.000000000000000000e+00 2.188825927734375000e+03 2.046730518341064453e+00 4.000000000000000000e+00 3.008205871582031250e+02 5.875000000000000000e+01 5.775000000000000000e+01
6.500000000000000000e+01 6.681538461538464162e+02 3.365175476074218750e+02 -7.268066406250000000e-01 0.000000000000000000e+00 0.000000000000000000e+00 2.195569335937500000e+03 9.750168323516845703e-01 4.000000000000000000e+00 3.543586730957031250e+02 5.925000000000000000e+01 5.775000000000000000e+01
6.400000000000000000e+01 6.415000000000001137e+02 2.827569274902343750e+02 -7.577819824218750000e-01 0.000000000000000000e+00 0.000000000000000000e+00 2.202312744140625000e+03 8.296218514442443848e-01 4.000000000000000000e+00 2.672571411132812500e+02 5.975000000000000000e+01 5.775000000000000000e+01
4.200000000000000000e+01 6.115307692307690104e+02 2.598476562500000000e+02 -7.398681640625000000e-01 0.000000000000000000e+00 0.000000000000000000e+00 2.216179687500000000e+03 2.002673149108886719e+00 3.000000000000000000e+00 2.741072692871093750e+02 6.025000000000000000e+01 5.775000000000000000e+01
4.400000000000000000e+01 5.882615384615385210e+02 2.583826904296875000e+02 -6.730957031250000000e-01 0.000000000000000000e+00 0.000000000000000000e+00 2.237170410156250000e+03 1.069561481475830078e+00 3.000000000000000000e+00 2.097865753173828125e+02 6.075000000000000000e+01 5.775000000000000000e+01
4.900000000000000000e+01 5.500692307692304439e+02 2.627828674316406250e+02 -5.394897460937500000e-01 0.000000000000000000e+00 3.529411852359771729e-01 2.279152099609375000e+03 1.380104780197143555e+00 4.000000000000000000e+00 1.656263275146484375e+02 6.175000000000000000e+01 5.775000000000000000e+01
5.200000000000000000e+01 5.394538461538461434e+02 2.666929931640625000e+02 -4.634094238281250000e-01 0.000000000000000000e+00 1.117647051811218262e+00 2.298212890625000000e+03 9.236701726913452148e-01 4.000000000000000000e+00 1.323021850585937500e+02 6.225000000000000000e+01 5.775000000000000000e+01
2.400000000000000000e+01 5.272615384615386347e+02 2.722477416992187500e+02 -3.842468261718750000e-01 0.000000000000000000e+00 0.000000000000000000e+00 2.316630371093750000e+03 1.520845055580139160e+00 3.000000000000000000e+00 9.226368713378906250e+01 6.275000000000000000e+01 5.775000000000000000e+01
5.400000000000000000e+01 5.284384615384617518e+02 2.776207580566406250e+02 -3.050842285156250000e-01 0.000000000000000000e+00 0.000000000000000000e+00 2.335048095703125000e+03 1.604902148246765137e+00 4.000000000000000000e+00 7.622074890136718750e+01 6.325000000000000000e+01 5.775000000000000000e+01
9.000000000000000000e+00 5.257692307692304894e+02 2.821828002929687500e+02 -2.259216308593750000e-01 0.000000000000000000e+00 2.941176593303680420e-01 2.353465576171875000e+03 2.335818052291870117e+00 1.000000000000000000e+00 9.013185119628906250e+01 6.375000000000000000e+01 5.775000000000000000e+01
5.800000000000000000e+01 5.063999999999997499e+02 2.757932739257812500e+02 -2.272338867187500000e-01 0.000000000000000000e+00 0.000000000000000000e+00 2.367420898437500000e+03 1.251554131507873535e+00 4.000000000000000000e+00 9.180858612060546875e+01 6.475000000000000000e+01 5.775000000000000000e+01
5.800000000000000000e+01 5.049384615384615245e+02 2.724075012207031250e+02 -2.278747558593750000e-01 0.000000000000000000e+00 2.352941185235977173e-01 2.374398681640625000e+03 3.128777265548706055e+00 4.000000000000000000e+00 9.685378265380859375e+01 6.525000000000000000e+01 5.775000000000000000e+01
9.000000000000000000e+00 5.034153846153848235e+02 2.702731933593750000e+02 -2.520446777343750000e-01 0.000000000000000000e+00 1.352941155433654785e+00 2.377755126953125000e+03 3.330492019653320312e+00 1.000000000000000000e+00 8.642784881591796875e+01 6.575000000000000000e+01 5.775000000000000000e+01
2.000000000000000000e+01 5.022000000000001592e+02 2.702455444335937500e+02 -3.467712402343750000e-01 0.000000000000000000e+00 2.941176593303680420e-01 2.370248291015625000e+03 3.338022947311401367e+00 3.000000000000000000e+00 5.089590454101562500e+01 6.625000000000000000e+01 5.775000000000000000e+01
5.000000000000000000e+00 5.009230769230768487e+02 2.675450134277343750e+02 -6.395874023437500000e-01 0.000000000000000000e+00 2.941176593303680420e-01 2.345947509765625000e+03 3.297918081283569336e+00 1.000000000000000000e+00 4.974072647094726562e+01 6.775000000000000000e+01 5.775000000000000000e+01
2.200000000000000000e+01 1.934784615384614881e+03 5.524427490234375000e+02 8.280090332031250000e+00 0.000000000000000000e+00 0.000000000000000000e+00 3.233111572265625000e+03 1.472214698791503906e+00 3.000000000000000000e+00 3.705987548828125000e+02 -4.750000000000000000e+00 5.825000000000000000e+01
6.000000000000000000e+00 1.404492307692307804e+03 5.038185729980468750e+02 8.020629882812500000e+00 0.000000000000000000e+00 2.941176593303680420e-01 3.186308349609375000e+03 2.854807615280151367e+00 1.000000000000000000e+00 2.781550598144531250e+02 -4.250000000000000000e+00 5.825000000000000000e+01
1.800000000000000000e+01 1.099576923076923322e+03 4.201376953125000000e+02 7.761169433593750000e+00 0.000000000000000000e+00 2.941176593303680420e-01 3.139505371093750000e+03 3.454264640808105469e+00 1.000000000000000000e+00 3.463065795898437500e+02 -3.750000000000000000e+00 5.825000000000000000e+01
3.600000000000000000e+01 1.872361538461537975e+03 5.894415283203125000e+02 7.498901367187500000e+00 0.000000000000000000e+00 0.000000000000000000e+00 2.970156738281250000e+03 2.149418830871582031e+00 3.000000000000000000e+00 3.165061035156250000e+02 7.250000000000000000e+00 5.825000000000000000e+01
5.200000000000000000e+01 6.530461538461538566e+02 2.908620910644531250e+02 6.867950439453125000e+00 0.000000000000000000e+00 0.000000000000000000e+00 3.027960693359375000e+03 2.207585573196411133e+00 4.000000000000000000e+00 1.095952758789062500e+02 1.575000000000000000e+01 5.825000000000000000e+01
2.200000000000000000e+01 7.299846153846148127e+02 3.429496765136718750e+02 4.176910400390625000e+00 0.000000000000000000e+00 2.941176593303680420e-01 2.772213378906250000e+03 3.387454986572265625e+00 3.000000000000000000e+00 7.955011749267578125e+01 2.575000000000000000e+01 5.825000000000000000e+01
5.600000000000000000e+01 6.676076923076923322e+02 3.641980285644531250e+02 3.639739990234375000e+00 0.000000000000000000e+00 2.352941185235977173e-01 2.791677001953125000e+03 3.375841379165649414e+00 4.000000000000000000e+00 9.487413024902343750e+01 2.825000000000000000e+01 5.825000000000000000e+01
5.900000000000000000e+01 6.850846153846154039e+02 3.744267578125000000e+02 3.591796875000000000e+00 0.000000000000000000e+00 0.000000000000000000e+00 2.791167480468750000e+03 3.364866733551025391e+00 4.000000000000000000e+00 1.334132537841796875e+02 2.875000000000000000e+01 5.825000000000000000e+01
6.000000000000000000e+01 6.492230769230772012e+02 3.752180480957031250e+02 3.543853759765625000e+00 0.000000000000000000e+00 0.000000000000000000e+00 2.790657958984375000e+03 3.379631519317626953e+00 4.000000000000000000e+00 1.090108413696289062e+02 2.925000000000000000e+01 5.825000000000000000e+01
1.000000000000000000e+01 6.442999999999999545e+02 3.711751403808593750e+02 3.495910644531250000e+00 0.000000000000000000e+00 0.000000000000000000e+00 2.790148437500000000e+03 3.398287773132324219e+00 1.000000000000000000e+00 7.491495513916015625e+01 2.975000000000000000e+01 5.825000000000000000e+01
4.500000000000000000e+01 6.283153846153844597e+02 3.662672729492187500e+02 3.408538818359375000e+00 0.000000000000000000e+00 0.000000000000000000e+00 2.775235595703125000e+03 3.359839916229248047e+00 4.000000000000000000e+00 5.278423309326171875e+01 3.025000000000000000e+01 5.825000000000000000e+01
3.600000000000000000e+01 6.536692307692308077e+02 3.553922729492187500e+02 3.028076171875000000e+00 0.000000000000000000e+00 3.529411852359771729e-01 2.687288330078125000e+03 2.344584703445434570e+00 3.000000000000000000e+00 3.692427825927734375e+01 3.175000000000000000e+01 5.825000000000000000e+01
5.800000000000000000e+01 6.829615384615383391e+02 3.583462524414062500e+02 2.832061767578125000e+00 0.000000000000000000e+00 0.000000000000000000e+00 2.645395751953125000e+03 3.378880739212036133e+00 4.000000000000000000e+00 7.212377929687500000e+01 3.225000000000000000e+01 5.825000000000000000e+01
5.700000000000000000e+01 7.272076923076923549e+02 3.650321350097656250e+02 2.613006591796875000e+00 0.000000000000000000e+00 0.000000000000000000e+00 2.599311279296875000e+03 3.328058004379272461e+00 4.000000000000000000e+00 1.182923812866210938e+02 3.275000000000000000e+01 5.825000000000000000e+01
1.800000000000000000e+01 7.424769230769227306e+02 3.710450439453125000e+02 2.393920898437500000e+00 0.000000000000000000e+00 0.000000000000000000e+00 2.553226562500000000e+03 2.591595172882080078e+00 1.000000000000000000e+00 1.819301147460937500e+02 3.325000000000000000e+01 5.825000000000000000e+01
4.400000000000000000e+01 7.338923076923080089e+02 3.752159423828125000e+02 2.174865722656250000e+00 0.000000000000000000e+00 0.000000000000000000e+00 2.507142089843750000e+03 2.974253892898559570e+00 3.000000000000000000e+00 1.626581268310546875e+02 3.375000000000000000e+01 5.825000000000000000e+01
4.800000000000000000e+01 7.036538461538465299e+02 3.760772705078125000e+02 2.043792724609375000e+00 0.000000000000000000e+00 5.882353186607360840e-01 2.493039794921875000e+03 3.329699039459228516e+00 4.000000000000000000e+00 1.494779968261718750e+02 3.425000000000000000e+01 5.825000000000000000e+01
5.800000000000000000e+01 7.067769230769231399e+02 3.682071533203125000e+02 1.912750244140625000e+00 0.000000000000000000e+00 0.000000000000000000e+00 2.478937744140625000e+03 3.317772865295410156e+00 4.000000000000000000e+00 1.516359863281250000e+02 3.475000000000000000e+01 5.825000000000000000e+01
6.300000000000000000e+01 7.211307692307689194e+02 3.574367980957031250e+02 1.781707763671875000e+00 0.000000000000000000e+00 0.000000000000000000e+00 2.464835449218750000e+03 2.909300565719604492e+00 4.000000000000000000e+00 1.832822875976562500e+02 3.525000000000000000e+01 5.825000000000000000e+01
5.300000000000000000e+01 6.779307692307692150e+02 3.497416687011718750e+02 1.659942626953125000e+00 0.000000000000000000e+00 5.882352963089942932e-02 2.451118408203125000e+03 3.139842987060546875e+00 4.000000000000000000e+00 1.424521484375000000e+02 3.575000000000000000e+01 5.825000000000000000e+01
5.200000000000000000e+01 6.648615384615382027e+02 3.460960083007812500e+02 1.565979003906250000e+00 0.000000000000000000e+00 0.000000000000000000e+00 2.438556396484375000e+03 2.302043199539184570e+00 4.000000000000000000e+00 1.552344665527343750e+02 3.625000000000000000e+01 5.825000000000000000e+01
5.900000000000000000e+01 6.953999999999996362e+02 3.439258728027343750e+02 1.378051757812500000e+00 0.000000000000000000e+00 0.000000000000000000e+00 2.413432617187500000e+03 3.318941116333007812e+00 4.000000000000000000e+00 2.182678527832031250e+02 3.725000000000000000e+01 5.825000000000000000e+01
3.800000000000000000e+01 5.739461538461536065e+02 3.275795898437500000e+02 1.282409667968750000e+00 0.000000000000000000e+00 0.000000000000000000e+00 2.429179931640625000e+03 3.351707696914672852e+00 3.000000000000000000e+00 1.367109680175781250e+02 3.975000000000000000e+01 5.825000000000000000e+01
1.300000000000000000e+01 5.510692307692308987e+02 3.185741882324218750e+02 1.293243408203125000e+00 0.000000000000000000e+00 0.000000000000000000e+00 2.432609375000000000e+03 3.372292280197143555e+00 1.000000000000000000e+00 1.438926391601562500e+02 4.025000000000000000e+01 5.825000000000000000e+01
5.400000000000000000e+01 5.578692307692308532e+02 3.088617858886718750e+02 1.304077148437500000e+00 0.000000000000000000e+00 0.000000000000000000e+00 2.436038818359375000e+03 3.375543117523193359e+00 4.000000000000000000e+00 1.106561279296875000e+02 4.075000000000000000e+01 5.825000000000000000e+01
4.700000000000000000e+01 5.754230769230769056e+02 3.024502868652343750e+02 1.314910888671875000e+00 0.000000000000000000e+00 0.000000000000000000e+00 2.439468261718750000e+03 3.362116336822509766e+00 4.000000000000000000e+00 1.152097244262695312e+02 4.125000000000000000e+01 5.825000000000000000e+01
5.500000000000000000e+01 5.814615384615383391e+02 3.033352355957031250e+02 1.285949707031250000e+00 0.000000000000000000e+00 0.000000000000000000e+00 2.437589599609375000e+03 3.343966960906982422e+00 4.000000000000000000e+00 1.771161346435546875e+02 4.175000000000000000e+01 5.825000000000000000e+01
6.100000000000000000e+01 5.696230769230770647e+02 3.117988891601562500e+02 1.257019042968750000e+00 0.000000000000000000e+00 0.000000000000000000e+00 2.435710937500000000e+03 3.332379817962646484e+00 4.000000000000000000e+00 1.871679077148437500e+02 4.225000000000000000e+01 5.825000000000000000e+01
6.000000000000000000e+01 5.659538461538460297e+02 3.238413391113281250e+02 1.228057861328125000e+00 0.000000000000000000e+00 0.000000000000000000e+00 2.433832031250000000e+03 3.328140735626220703e+00 4.000000000000000000e+00 1.856397705078125000e+02 4.275000000000000000e+01 5.825000000000000000e+01
5.600000000000000000e+01 5.617692307692308304e+02 3.330223388671875000e+02 1.182891845703125000e+00 0.000000000000000000e+00 0.000000000000000000e+00 2.429782470703125000e+03 3.326417446136474609e+00 4.000000000000000000e+00 1.412760009765625000e+02 4.325000000000000000e+01 5.825000000000000000e+01
1.400000000000000000e+01 5.583538461538460069e+02 3.376222229003906250e+02 1.089111328125000000e+00 0.000000000000000000e+00 0.000000000000000000e+00 2.419220458984375000e+03 3.122781753540039062e+00 1.000000000000000000e+00 1.285624847412109375e+02 4.375000000000000000e+01 5.825000000000000000e+01
6.400000000000000000e+01 5.399538461538463707e+02 3.397143249511718750e+02 9.953308105468750000e-01 0.000000000000000000e+00 0.000000000000000000e+00 2.408658447265625000e+03 1.901674270629882812e+00 4.000000000000000000e+00 1.539566650390625000e+02 4.425000000000000000e+01 5.825000000000000000e+01
4.300000000000000000e+01 5.667000000000000455e+02 3.419662780761718750e+02 9.015808105468750000e-01 0.000000000000000000e+00 0.000000000000000000e+00 2.398096435546875000e+03 2.801861524581909180e+00 3.000000000000000000e+00 1.192322845458984375e+02 4.475000000000000000e+01 5.825000000000000000e+01
5.800000000000000000e+01 5.874461538461537202e+02 3.423268432617187500e+02 8.259887695312500000e-01 0.000000000000000000e+00 0.000000000000000000e+00 2.389263183593750000e+03 2.739836215972900391e+00 4.000000000000000000e+00 1.308459320068359375e+02 4.525000000000000000e+01 5.825000000000000000e+01
6.200000000000000000e+01 6.257384615384615927e+02 3.395570983886718750e+02 7.686157226562500000e-01 0.000000000000000000e+00 0.000000000000000000e+00 2.382158935546875000e+03 3.367070674896240234e+00 4.000000000000000000e+00 1.164077911376953125e+02 4.575000000000000000e+01 5.825000000000000000e+01
6.400000000000000000e+01 6.216846153846154266e+02 3.311133117675781250e+02 7.112121582031250000e-01 0.000000000000000000e+00 0.000000000000000000e+00 2.375054687500000000e+03 3.374468088150024414e+00 4.000000000000000000e+00 1.178716049194335938e+02 4.625000000000000000e+01 5.825000000000000000e+01
2.100000000000000000e+01 6.337461538461537884e+02 3.323689575195312500e+02 6.190185546875000000e-01 0.000000000000000000e+00 0.000000000000000000e+00 2.364166259765625000e+03 2.251291751861572266e+00 3.000000000000000000e+00 1.315140686035156250e+02 4.775000000000000000e+01 5.825000000000000000e+01
4.700000000000000000e+01 6.421769230769233445e+02 3.708266906738281250e+02 6.307067871093750000e-01 0.000000000000000000e+00 0.000000000000000000e+00 2.365724609375000000e+03 2.781807422637939453e+00 4.000000000000000000e+00 1.536882324218750000e+02 4.925000000000000000e+01 5.825000000000000000e+01
4.600000000000000000e+01 6.325846153846149491e+02 3.719503173828125000e+02 6.658325195312500000e-01 0.000000000000000000e+00 2.352941185235977173e-01 2.369577636718750000e+03 3.384792089462280273e+00 4.000000000000000000e+00 1.480333557128906250e+02 4.975000000000000000e+01 5.825000000000000000e+01
1.300000000000000000e+01 6.289384615384614108e+02 3.684011535644531250e+02 7.009277343750000000e-01 0.000000000000000000e+00 2.941176593303680420e-01 2.373430664062500000e+03 3.360249519348144531e+00 1.000000000000000000e+00 1.950879058837890625e+02 5.025000000000000000e+01 5.825000000000000000e+01
5.700000000000000000e+01 6.138461538461540385e+02 2.320116424560546875e+02 5.917358398437500000e-01 0.000000000000000000e+00 0.000000000000000000e+00 2.339685791015625000e+03 2.133286476135253906e+00 4.000000000000000000e+00 1.993259277343750000e+02 5.275000000000000000e+01 5.825000000000000000e+01
5.800000000000000000e+01 6.394999999999998863e+02 2.676702270507812500e+02 4.227600097656250000e-01 0.000000000000000000e+00 2.941176593303680420e-01 2.302538085937500000e+03 2.108195781707763672e+00 4.000000000000000000e+00 2.915511779785156250e+02 5.375000000000000000e+01 5.825000000000000000e+01
1.500000000000000000e+01 6.425615384615382482e+02 2.916856994628906250e+02 3.382568359375000000e-01 0.000000000000000000e+00 0.000000000000000000e+00 2.283964355468750000e+03 2.117626667022705078e+00 1.000000000000000000e+00 2.084728240966796875e+02 5.425000000000000000e+01 5.825000000000000000e+01
4.200000000000000000e+01 6.547076923076922412e+02 3.047796325683593750e+02 1.808776855468750000e-01 0.000000000000000000e+00 0.000000000000000000e+00 2.261181396484375000e+03 2.120967149734497070e+00 3.000000000000000000e+00 1.499204864501953125e+02 5.475000000000000000e+01 5.825000000000000000e+01
6.800000000000000000e+01 6.778692307692308532e+02 3.205190429687500000e+02 -1.825256347656250000e-01 0.000000000000000000e+00 0.000000000000000000e+00 2.212809326171875000e+03 2.111278295516967773e+00 4.000000000000000000e+00 2.401099700927734375e+02 5.575000000000000000e+01 5.825000000000000000e+01
2.300000000000000000e+01 6.855000000000002274e+02 3.285722961425781250e+02 -3.642272949218750000e-01 0.000000000000000000e+00 2.941176593303680420e-01 2.188623291015625000e+03 2.110582351684570312e+00 3.000000000000000000e+00 1.714879455566406250e+02 5.625000000000000000e+01 5.825000000000000000e+01
6.500000000000000000e+01 6.877153846153846644e+02 3.735655822753906250e+02 -6.588439941406250000e-01 0.000000000000000000e+00 0.000000000000000000e+00 2.161366943359375000e+03 2.085429906845092773e+00 4.000000000000000000e+00 2.059947204589843750e+02 5.725000000000000000e+01 5.825000000000000000e+01
2.500000000000000000e+01 6.959307692307692150e+02 3.915508422851562500e+02 -8.061218261718750000e-01 0.000000000000000000e+00 0.000000000000000000e+00 2.147738769531250000e+03 2.054709434509277344e+00 3.000000000000000000e+00 1.398606414794921875e+02 5.775000000000000000e+01 5.825000000000000000e+01
6.600000000000000000e+01 7.023999999999998636e+02 3.830216064453125000e+02 -9.266357421875000000e-01 0.000000000000000000e+00 0.000000000000000000e+00 2.138799560546875000e+03 2.024821996688842773e+00 4.000000000000000000e+00 2.694266662597656250e+02 5.825000000000000000e+01 5.825000000000000000e+01
6.200000000000000000e+01 7.008384615384615017e+02 3.507511291503906250e+02 -9.667663574218750000e-01 0.000000000000000000e+00 0.000000000000000000e+00 2.143926513671875000e+03 1.998964309692382812e+00 4.000000000000000000e+00 3.885043640136718750e+02 5.875000000000000000e+01 5.825000000000000000e+01
6.800000000000000000e+01 6.744846153846153811e+02 3.082409362792968750e+02 -1.006896972656250000e+00 9.999999776482582092e-03 0.000000000000000000e+00 2.149053710937500000e+03 1.464597821235656738e+00 4.000000000000000000e+00 4.485921325683593750e+02 5.925000000000000000e+01 5.825000000000000000e+01
1.800000000000000000e+01 6.402692307692310578e+02 2.725144042968750000e+02 -1.047027587890625000e+00 0.000000000000000000e+00 0.000000000000000000e+00 2.154180664062500000e+03 1.844198584556579590e+00 1.000000000000000000e+00 2.652315979003906250e+02 5.975000000000000000e+01 5.825000000000000000e+01
5.500000000000000000e+01 6.159230769230770193e+02 2.617820129394531250e+02 -1.036834716796875000e+00 0.000000000000000000e+00 0.000000000000000000e+00 2.165863525390625000e+03 8.393776416778564453e-01 4.000000000000000000e+00 2.185968780517578125e+02 6.025000000000000000e+01 5.825000000000000000e+01
5.600000000000000000e+01 5.962923076923074177e+02 2.634707641601562500e+02 -9.762878417968750000e-01 0.000000000000000000e+00 2.352941185235977173e-01 2.184102050781250000e+03 8.473360538482666016e-01 4.000000000000000000e+00 1.629709625244140625e+02 6.075000000000000000e+01 5.825000000000000000e+01
6.200000000000000000e+01 5.753384615384613880e+02 2.668494262695312500e+02 -9.157714843750000000e-01 0.000000000000000000e+00 0.000000000000000000e+00 2.202340576171875000e+03 8.510273694992065430e-01 4.000000000000000000e+00 1.720407409667968750e+02 6.125000000000000000e+01 5.825000000000000000e+01
5.900000000000000000e+01 5.502153846153846644e+02 2.728659362792968750e+02 -7.774353027343750000e-01 0.000000000000000000e+00 0.000000000000000000e+00 2.238035644531250000e+03 8.577706813812255859e-01 4.000000000000000000e+00 1.160410003662109375e+02 6.225000000000000000e+01 5.825000000000000000e+01
6.000000000000000000e+01 5.435461538461537430e+02 2.762269592285156250e+02 -6.938476562500000000e-01 0.000000000000000000e+00 0.000000000000000000e+00 2.255231445312500000e+03 8.603562116622924805e-01 4.000000000000000000e+00 8.607324981689453125e+01 6.275000000000000000e+01 5.825000000000000000e+01
5.700000000000000000e+01 5.410230769230768146e+02 2.819064025878906250e+02 -6.102905273437500000e-01 0.000000000000000000e+00 0.000000000000000000e+00 2.272427246093750000e+03 8.606118559837341309e-01 4.000000000000000000e+00 8.208886718750000000e+01 6.325000000000000000e+01 5.825000000000000000e+01
5.800000000000000000e+01 5.402153846153846644e+02 2.874342651367187500e+02 -5.267028808593750000e-01 0.000000000000000000e+00 0.000000000000000000e+00 2.289623291015625000e+03 8.584407567977905273e-01 4.000000000000000000e+00 1.036580123901367188e+02 6.375000000000000000e+01 5.825000000000000000e+01
5.400000000000000000e+01 5.328307692307693060e+02 2.881664428710937500e+02 -5.189208984375000000e-01 0.000000000000000000e+00 0.000000000000000000e+00 2.296063476562500000e+03 8.588276505470275879e-01 4.000000000000000000e+00 1.071681137084960938e+02 6.425000000000000000e+01 5.825000000000000000e+01
5.900000000000000000e+01 5.258307692307691923e+02 2.875965576171875000e+02 -5.111389160156250000e-01 0.000000000000000000e+00 5.882353186607360840e-01 2.302503906250000000e+03 1.253956913948059082e+00 4.000000000000000000e+00 7.996055603027343750e+01 6.475000000000000000e+01 5.825000000000000000e+01
1.200000000000000000e+01 5.202230769230768601e+02 2.871022033691406250e+02 -5.033569335937500000e-01 0.000000000000000000e+00 2.941176593303680420e-01 2.308944091796875000e+03 2.761405229568481445e+00 1.000000000000000000e+00 5.752624893188476562e+01 6.525000000000000000e+01 5.825000000000000000e+01
1.000000000000000000e+01 5.192538461538463253e+02 2.796640014648437500e+02 -6.149902343750000000e-01 0.000000000000000000e+00 0.000000000000000000e+00 2.304510253906250000e+03 3.274067640304565430e+00 1.000000000000000000e+00 6.035826492309570312e+01 6.625000000000000000e+01 5.825000000000000000e+01
2.200000000000000000e+01 5.195153846153848463e+02 2.758400878906250000e+02 -7.089233398437500000e-01 0.000000000000000000e+00 0.000000000000000000e+00 2.297099121093750000e+03 2.993885278701782227e+00 3.000000000000000000e+00 5.926932907104492188e+01 6.675000000000000000e+01 5.825000000000000000e+01
1.800000000000000000e+01 2.292376923076922139e+03 6.257787475585937500e+02 6.621063232421875000e+00 0.000000000000000000e+00 0.000000000000000000e+00 2.746415039062500000e+03 2.025158882141113281e+00 1.000000000000000000e+00 4.952757568359375000e+02 6.250000000000000000e+00 5.875000000000000000e+01
2.300000000000000000e+01 1.921023076923077497e+03 6.338890380859375000e+02 6.154052734375000000e+00 0.000000000000000000e+00 0.000000000000000000e+00 2.628162841796875000e+03 1.555526852607727051e+00 3.000000000000000000e+00 5.693630981445312500e+02 6.750000000000000000e+00 5.875000000000000000e+01
7.000000000000000000e+00 1.721723076923076860e+03 6.163695678710937500e+02 5.687042236328125000e+00 0.000000000000000000e+00 0.000000000000000000e+00 2.509910400390625000e+03 1.646794557571411133e+00 1.000000000000000000e+00 8.662701416015625000e+02 7.250000000000000000e+00 5.875000000000000000e+01
5.000000000000000000e+01 1.378546153846154311e+03 5.885505371093750000e+02 5.374023437500000000e+00 0.000000000000000000e+00 0.000000000000000000e+00 2.453531494140625000e+03 1.939907550811767578e+00 4.000000000000000000e+00 4.289379882812500000e+02 7.750000000000000000e+00 5.875000000000000000e+01
5.400000000000000000e+01 1.228176923076923003e+03 5.579427490234375000e+02 5.214996337890625000e+00 0.000000000000000000e+00 0.000000000000000000e+00 2.459025878906250000e+03 1.988010525703430176e+00 4.000000000000000000e+00 2.909396972656250000e+02 8.250000000000000000e+00 5.875000000000000000e+01
5.800000000000000000e+01 1.294199999999999818e+03 5.211113891601562500e+02 5.055969238281250000e+00 0.000000000000000000e+00 0.000000000000000000e+00 2.464520019531250000e+03 2.066010713577270508e+00 4.000000000000000000e+00 2.974413452148437500e+02 8.750000000000000000e+00 5.875000000000000000e+01
5.000000000000000000e+01 9.869615384615384528e+02 3.972496032714843750e+02 4.610839843750000000e+00 0.000000000000000000e+00 0.000000000000000000e+00 2.532045654296875000e+03 2.171107530593872070e+00 4.000000000000000000e+00 1.552865295410156250e+02 1.175000000000000000e+01 5.875000000000000000e+01
6.300000000000000000e+01 7.070999999999997954e+02 2.935683593750000000e+02 5.608001708984375000e+00 0.000000000000000000e+00 0.000000000000000000e+00 2.808496093750000000e+03 2.159280300140380859e+00 4.000000000000000000e+00 1.339658660888671875e+02 1.525000000000000000e+01 5.875000000000000000e+01
6.300000000000000000e+01 6.673076923076924913e+02 2.896881103515625000e+02 6.041992187500000000e+00 0.000000000000000000e+00 0.000000000000000000e+00 2.857267578125000000e+03 2.176037788391113281e+00 4.000000000000000000e+00 6.955163574218750000e+01 1.575000000000000000e+01 5.875000000000000000e+01
5.500000000000000000e+01 6.295923076923078270e+02 2.936181030273437500e+02 6.475982666015625000e+00 0.000000000000000000e+00 0.000000000000000000e+00 2.906039062500000000e+03 2.195926666259765625e+00 4.000000000000000000e+00 1.007149276733398438e+02 1.625000000000000000e+01 5.875000000000000000e+01
6.000000000000000000e+00 6.585153846153846189e+02 3.561891784667968750e+02 4.821136474609375000e+00 0.000000000000000000e+00 0.000000000000000000e+00 2.752949462890625000e+03 3.393476724624633789e+00 1.000000000000000000e+00 1.664689254760742188e+01 2.425000000000000000e+01 5.875000000000000000e+01
5.600000000000000000e+01 6.825461538461537430e+02 3.808283081054687500e+02 4.518646240234375000e+00 0.000000000000000000e+00 0.000000000000000000e+00 2.748674316406250000e+03 3.396933794021606445e+00 4.000000000000000000e+00 5.241391754150390625e+01 2.475000000000000000e+01 5.875000000000000000e+01
5.800000000000000000e+01 7.377999999999999545e+02 3.490151672363281250e+02 3.723205566406250000e+00 0.000000000000000000e+00 0.000000000000000000e+00 2.723256347656250000e+03 3.346666812896728516e+00 4.000000000000000000e+00 8.024579620361328125e+01 2.625000000000000000e+01 5.875000000000000000e+01
4.400000000000000000e+01 6.807153846153844370e+02 3.516558532714843750e+02 3.365783691406250000e+00 0.000000000000000000e+00 5.882352963089942932e-02 2.731517333984375000e+03 3.338852405548095703e+00 3.000000000000000000e+00 8.765771484375000000e+01 2.825000000000000000e+01 5.875000000000000000e+01
4.300000000000000000e+01 6.739846153846154948e+02 3.704968872070312500e+02 3.314880371093750000e+00 0.000000000000000000e+00 0.000000000000000000e+00 2.729220947265625000e+03 3.342507839202880859e+00 3.000000000000000000e+00 8.053706359863281250e+01 2.875000000000000000e+01 5.875000000000000000e+01
3.400000000000000000e+01 6.490692307692307850e+02 3.755928955078125000e+02 3.213043212890625000e+00 0.000000000000000000e+00 4.705882370471954346e-01 2.724627685546875000e+03 3.207942008972167969e+00 3.000000000000000000e+00 8.849605560302734375e+01 2.975000000000000000e+01 5.875000000000000000e+01
4.500000000000000000e+01 6.418076923076922640e+02 3.729899291992187500e+02 3.138000488281250000e+00 0.000000000000000000e+00 4.705882370471954346e-01 2.712174804687500000e+03 2.183205604553222656e+00 4.000000000000000000e+00 6.886281585693359375e+01 3.025000000000000000e+01 5.875000000000000000e+01
5.000000000000000000e+01 6.495076923076920821e+02 3.679944763183593750e+02 3.038848876953125000e+00 0.000000000000000000e+00 7.058823704719543457e-01 2.689565429687500000e+03 2.975588798522949219e+00 4.000000000000000000e+00 6.303990554809570312e+01 3.075000000000000000e+01 5.875000000000000000e+01
6.000000000000000000e+00 6.490999999999997954e+02 3.618758850097656250e+02 2.840515136718750000e+00 0.000000000000000000e+00 2.941176593303680420e-01 2.644346923828125000e+03 2.172253847122192383e+00 1.000000000000000000e+00 4.676434707641601562e+01 3.175000000000000000e+01 5.875000000000000000e+01
4.700000000000000000e+01 6.824384615384614108e+02 3.658506469726562500e+02 2.655212402343750000e+00 0.000000000000000000e+00 4.705882370471954346e-01 2.606463134765625000e+03 2.225396871566772461e+00 4.000000000000000000e+00 7.099454498291015625e+01 3.225000000000000000e+01 5.875000000000000000e+01
7.000000000000000000e+00 7.229076923076925141e+02 3.727977905273437500e+02 2.441192626953125000e+00 0.000000000000000000e+00 4.705882370471954346e-01 2.563488037109375000e+03 3.320963382720947266e+00 1.000000000000000000e+00 9.050857543945312500e+01 3.275000000000000000e+01 5.875000000000000000e+01
3.600000000000000000e+01 7.309153846153844825e+02 3.764341430664062500e+02 2.013122558593750000e+00 0.000000000000000000e+00 0.000000000000000000e+00 2.477537597656250000e+03 3.103262901306152344e+00 3.000000000000000000e+00 1.961745758056640625e+02 3.375000000000000000e+01 5.875000000000000000e+01
5.000000000000000000e+01 7.166230769230768374e+02 3.673306579589843750e+02 1.893066406250000000e+00 0.000000000000000000e+00 0.000000000000000000e+00 2.461808593750000000e+03 3.284465789794921875e+00 4.000000000000000000e+00 1.813218383789062500e+02 3.425000000000000000e+01 5.875000000000000000e+01
7.000000000000000000e+00 6.978692307692307395e+02 3.491601867675781250e+02 1.772979736328125000e+00 0.000000000000000000e+00 0.000000000000000000e+00 2.446079589843750000e+03 2.691658258438110352e+00 1.000000000000000000e+00 1.621745758056640625e+02 3.475000000000000000e+01 5.875000000000000000e+01
5.300000000000000000e+01 7.175000000000001137e+02 3.289465942382812500e+02 1.652923583984375000e+00 0.000000000000000000e+00 5.882352963089942932e-02 2.430350585937500000e+03 2.110937833786010742e+00 4.000000000000000000e+00 1.872715911865234375e+02 3.525000000000000000e+01 5.875000000000000000e+01
5.800000000000000000e+01 6.929923076923079179e+02 3.149519958496093750e+02 1.540252685546875000e+00 0.000000000000000000e+00 0.000000000000000000e+00 2.415653320312500000e+03 2.117364645004272461e+00 4.000000000000000000e+00 1.272879028320312500e+02 3.575000000000000000e+01 5.875000000000000000e+01
1.200000000000000000e+01 6.915076923076919684e+02 3.148204650878906250e+02 1.449768066406250000e+00 0.000000000000000000e+00 0.000000000000000000e+00 2.404052246093750000e+03 2.150982379913330078e+00 1.000000000000000000e+00 1.329197998046875000e+02 3.625000000000000000e+01 5.875000000000000000e+01
9.000000000000000000e+00 6.938384615384615017e+02 3.238029479980468750e+02 1.359283447265625000e+00 0.000000000000000000e+00 1.176470592617988586e-01 2.392450927734375000e+03 3.226805686950683594e+00 1.000000000000000000e+00 1.225215759277343750e+02 3.675000000000000000e+01 5.875000000000000000e+01
5.700000000000000000e+01 6.069230769230767919e+02 3.391076049804687500e+02 1.154357910156250000e+00 0.000000000000000000e+00 0.000000000000000000e+00 2.380345703125000000e+03 3.295959472656250000e+00 4.000000000000000000e+00 1.817062683105468750e+02 3.875000000000000000e+01 5.875000000000000000e+01
5.000000000000000000e+01 5.662846153846152220e+02 3.173786926269531250e+02 1.114837646484375000e+00 0.000000000000000000e+00 5.882353186607360840e-01 2.384274169921875000e+03 3.287917852401733398e+00 4.000000000000000000e+00 1.555110778808593750e+02 3.975000000000000000e+01 5.875000000000000000e+01
2.800000000000000000e+01 5.805769230769230944e+02 3.095896301269531250e+02 1.108245849609375000e+00 0.000000000000000000e+00 1.117647051811218262e+00 2.385981201171875000e+03 3.290153026580810547e+00 3.000000000000000000e+00 1.779570922851562500e+02 4.025000000000000000e+01 5.875000000000000000e+01
5.900000000000000000e+01 5.749461538461536065e+02 3.028419189453125000e+02 1.101684570312500000e+00 0.000000000000000000e+00 5.294117927551269531e-01 2.387687988281250000e+03 3.299229860305786133e+00 4.000000000000000000e+00 1.762485351562500000e+02 4.075000000000000000e+01 5.875000000000000000e+01
6.900000000000000000e+01 5.646846153846155403e+02 3.003420104980468750e+02 1.095092773437500000e+00 0.000000000000000000e+00 0.000000000000000000e+00 2.389395019531250000e+03 3.309462308883666992e+00 4.000000000000000000e+00 1.475924377441406250e+02 4.125000000000000000e+01 5.875000000000000000e+01
6.100000000000000000e+01 5.879384615384616382e+02 3.028120117187500000e+02 1.055419921875000000e+00 0.000000000000000000e+00 0.000000000000000000e+00 2.386080322265625000e+03 3.297485113143920898e+00 4.000000000000000000e+00 1.767025451660156250e+02 4.175000000000000000e+01 5.875000000000000000e+01
4.500000000000000000e+01 5.958692307692308532e+02 3.129129333496093750e+02 1.015716552734375000e+00 0.000000000000000000e+00 0.000000000000000000e+00 2.382765380859375000e+03 3.279288053512573242e+00 4.000000000000000000e+00 2.112464294433593750e+02 4.225000000000000000e+01 5.875000000000000000e+01
2.300000000000000000e+01 5.781000000000001364e+02 3.279849853515625000e+02 9.760131835937500000e-01 0.000000000000000000e+00 0.000000000000000000e+00 2.379450683593750000e+03 3.272890806198120117e+00 3.000000000000000000e+00 1.958822631835937500e+02 4.275000000000000000e+01 5.875000000000000000e+01
6.800000000000000000e+01 5.613846153846153584e+02 3.405474548339843750e+02 9.243164062500000000e-01 0.000000000000000000e+00 0.000000000000000000e+00 2.374522705078125000e+03 3.274293422698974609e+00 4.000000000000000000e+00 1.685656738281250000e+02 4.325000000000000000e+01 5.875000000000000000e+01
6.800000000000000000e+01 5.389000000000000909e+02 3.468662414550781250e+02 8.367004394531250000e-01 0.000000000000000000e+00 0.000000000000000000e+00 2.364755371093750000e+03 3.281708002090454102e+00 4.000000000000000000e+00 2.165839233398437500e+02 4.375000000000000000e+01 5.875000000000000000e+01
4.500000000000000000e+01 5.242384615384613653e+02 3.475458068847656250e+02 7.490539550781250000e-01 0.000000000000000000e+00 0.000000000000000000e+00 2.354987792968750000e+03 3.296439170837402344e+00 4.000000000000000000e+00 1.870401000976562500e+02 4.425000000000000000e+01 5.875000000000000000e+01
6.200000000000000000e+01 5.586076923076923322e+02 3.490307312011718750e+02 6.614074707031250000e-01 0.000000000000000000e+00 0.000000000000000000e+00 2.345220458984375000e+03 1.433943986892700195e+00 4.000000000000000000e+00 1.875063629150390625e+02 4.475000000000000000e+01 5.875000000000000000e+01
3.200000000000000000e+01 5.975153846153845052e+02 3.496128540039062500e+02 5.911560058593750000e-01 0.000000000000000000e+00 0.000000000000000000e+00 2.336927490234375000e+03 1.217260003089904785e+00 3.000000000000000000e+00 1.775136108398437500e+02 4.525000000000000000e+01 5.875000000000000000e+01
6.500000000000000000e+01 6.186230769230767237e+02 3.493001403808593750e+02 5.382690429687500000e-01 0.000000000000000000e+00 0.000000000000000000e+00 2.330108642578125000e+03 3.323995351791381836e+00 4.000000000000000000e+00 1.312960662841796875e+02 4.575000000000000000e+01 5.875000000000000000e+01
5.800000000000000000e+01 6.183615384615384301e+02 3.451324768066406250e+02 4.853820800781250000e-01 0.000000000000000000e+00 0.000000000000000000e+00 2.323290039062500000e+03 2.944665431976318359e+00 4.000000000000000000e+00 1.376653747558593750e+02 4.625000000000000000e+01 5.875000000000000000e+01
5.400000000000000000e+01 6.142692307692307168e+02 3.401723632812500000e+02 4.324951171875000000e-01 0.000000000000000000e+00 0.000000000000000000e+00 2.316471435546875000e+03 2.900359630584716797e+00 4.000000000000000000e+00 1.312688598632812500e+02 4.675000000000000000e+01 5.875000000000000000e+01
6.300000000000000000e+01 6.252076923076924686e+02 3.414333496093750000e+02 4.118347167968750000e-01 0.000000000000000000e+00 0.000000000000000000e+00 2.313896728515625000e+03 2.783296346664428711e+00 4.000000000000000000e+00 1.786215515136718750e+02 4.725000000000000000e+01 5.875000000000000000e+01
6.400000000000000000e+01 6.366923076923077360e+02 3.498565063476562500e+02 4.019470214843750000e-01 0.000000000000000000e+00 0.000000000000000000e+00 2.312736816406250000e+03 3.336495876312255859e+00 4.000000000000000000e+00 1.695809020996093750e+02 4.775000000000000000e+01 5.875000000000000000e+01
6.000000000000000000e+01 6.439461538461539476e+02 3.629305725097656250e+02 3.920288085937500000e-01 0.000000000000000000e+00 0.000000000000000000e+00 2.311576904296875000e+03 2.349316120147705078e+00 4.000000000000000000e+00 1.848694305419921875e+02 4.825000000000000000e+01 5.875000000000000000e+01
5.800000000000000000e+01 6.512461538461541295e+02 3.737740173339843750e+02 3.821411132812500000e-01 0.000000000000000000e+00 0.000000000000000000e+00 2.310416992187500000e+03 2.093451976776123047e+00 4.000000000000000000e+00 1.634170227050781250e+02 4.875000000000000000e+01 5.875000000000000000e+01
5.900000000000000000e+01 6.452769230769229125e+02 3.793456726074218750e+02 4.060363769531250000e-01 0.000000000000000000e+00 0.000000000000000000e+00 2.312632324218750000e+03 2.155833721160888672e+00 4.000000000000000000e+00 1.220771636962890625e+02 4.925000000000000000e+01 5.875000000000000000e+01
5.500000000000000000e+01 6.394307692307694424e+02 3.806810913085937500e+02 4.299621582031250000e-01 0.000000000000000000e+00 2.941176593303680420e-01 2.314847900390625000e+03 2.152614831924438477e+00 4.000000000000000000e+00 1.431834259033203125e+02 4.975000000000000000e+01 5.875000000000000000e+01
5.900000000000000000e+01 6.402384615384617064e+02 3.775139160156250000e+02 4.538574218750000000e-01 0.000000000000000000e+00 6.470588445663452148e-01 2.317063232421875000e+03 2.143123626708984375e+00 4.000000000000000000e+00 1.225436782836914062e+02 5.025000000000000000e+01 5.875000000000000000e+01
3.800000000000000000e+01 6.321230769230770647e+02 3.662602233886718750e+02 4.634094238281250000e-01 0.000000000000000000e+00 2.941176593303680420e-01 2.316684326171875000e+03 2.135740280151367188e+00 3.000000000000000000e+00 1.490340270996093750e+02 5.075000000000000000e+01 5.875000000000000000e+01
6.300000000000000000e+01 6.229076923076924004e+02 3.427176818847656250e+02 4.299621582031250000e-01 0.000000000000000000e+00 0.000000000000000000e+00 2.308522705078125000e+03 2.126642227172851562e+00 4.000000000000000000e+00 1.909853820800781250e+02 5.125000000000000000e+01 5.875000000000000000e+01
5.900000000000000000e+01 6.199538461538461434e+02 3.130573120117187500e+02 3.964843750000000000e-01 0.000000000000000000e+00 0.000000000000000000e+00 2.300361083984375000e+03 2.116771221160888672e+00 4.000000000000000000e+00 2.236072387695312500e+02 5.175000000000000000e+01 5.875000000000000000e+01
3.400000000000000000e+01 6.199153846153847098e+02 2.905416564941406250e+02 3.630065917968750000e-01 0.000000000000000000e+00 0.000000000000000000e+00 2.292199462890625000e+03 2.111033916473388672e+00 3.000000000000000000e+00 2.045632629394531250e+02 5.225000000000000000e+01 5.875000000000000000e+01
6.600000000000000000e+01 6.308384615384618428e+02 2.792680664062500000e+02 2.964782714843750000e-01 0.000000000000000000e+00 0.000000000000000000e+00 2.278826171875000000e+03 2.093890190124511719e+00 4.000000000000000000e+00 2.734517517089843750e+02 5.275000000000000000e+01 5.875000000000000000e+01
5.200000000000000000e+01 6.399307692307696698e+02 2.807373352050781250e+02 1.968994140625000000e-01 0.000000000000000000e+00 0.000000000000000000e+00 2.260241210937500000e+03 2.070679426193237305e+00 4.000000000000000000e+00 2.136448974609375000e+02 5.325000000000000000e+01 5.875000000000000000e+01
7.000000000000000000e+01 6.473999999999997499e+02 2.934902954101562500e+02 9.732055664062500000e-02 0.000000000000000000e+00 0.000000000000000000e+00 2.241656250000000000e+03 2.065383195877075195e+00 4.000000000000000000e+00 2.646961364746093750e+02 5.375000000000000000e+01 5.875000000000000000e+01
5.200000000000000000e+01 6.571461538461542204e+02 3.062827453613281250e+02 -2.258300781250000000e-03 0.000000000000000000e+00 0.000000000000000000e+00 2.223071533203125000e+03 2.077979803085327148e+00 4.000000000000000000e+00 2.321159820556640625e+02 5.425000000000000000e+01 5.875000000000000000e+01
2.400000000000000000e+01 6.669384615384614108e+02 3.142617187500000000e+02 -1.697998046875000000e-01 0.000000000000000000e+00 0.000000000000000000e+00 2.200914550781250000e+03 2.085484266281127930e+00 3.000000000000000000e+00 1.954228515625000000e+02 5.475000000000000000e+01 5.875000000000000000e+01
7.000000000000000000e+01 6.753846153846152447e+02 3.186902160644531250e+02 -3.599548339843750000e-01 0.000000000000000000e+00 2.352941185235977173e-01 2.177566894531250000e+03 2.086969375610351562e+00 4.000000000000000000e+00 1.955593872070312500e+02 5.525000000000000000e+01 5.875000000000000000e+01
6.300000000000000000e+01 7.005769230769229807e+02 3.370549316406250000e+02 -8.854064941406250000e-01 0.000000000000000000e+00 0.000000000000000000e+00 2.116869628906250000e+03 2.063820600509643555e+00 4.000000000000000000e+00 1.541790313720703125e+02 5.675000000000000000e+01 5.875000000000000000e+01
6.200000000000000000e+01 7.054307692307692150e+02 3.552412719726562500e+02 -1.030487060546875000e+00 0.000000000000000000e+00 0.000000000000000000e+00 2.102867675781250000e+03 2.034235715866088867e+00 4.000000000000000000e+00 2.140610809326171875e+02 5.725000000000000000e+01 5.875000000000000000e+01
2.800000000000000000e+01 7.058153846153848008e+02 3.607890319824218750e+02 -1.175598144531250000e+00 0.000000000000000000e+00 0.000000000000000000e+00 2.088865722656250000e+03 1.995212197303771973e+00 3.000000000000000000e+00 2.892728576660156250e+02 5.775000000000000000e+01 5.875000000000000000e+01
6.000000000000000000e+01 7.043923076923081226e+02 3.424158020019531250e+02 -1.293914794921875000e+00 9.999999776482582092e-03 2.941176593303680420e-01 2.079409667968750000e+03 1.955475449562072754e+00 4.000000000000000000e+00 3.947969360351562500e+02 5.825000000000000000e+01 5.875000000000000000e+01
5.200000000000000000e+01 7.114153846153845961e+02 3.139380798339843750e+02 -1.331878662109375000e+00 9.999999776482582092e-03 2.941176593303680420e-01 2.083592529296875000e+03 1.928007125854492188e+00 4.000000000000000000e+00 5.057106018066406250e+02 5.875000000000000000e+01 5.875000000000000000e+01
7.200000000000000000e+01 6.757615384615384073e+02 2.908688964843750000e+02 -1.369842529296875000e+00 9.999999776482582092e-03 0.000000000000000000e+00 2.087775390625000000e+03 1.944214582443237305e+00 4.000000000000000000e+00 3.493111877441406250e+02 5.925000000000000000e+01 5.875000000000000000e+01
6.300000000000000000e+01 6.346153846153843006e+02 2.792735900878906250e+02 -1.407806396484375000e+00 0.000000000000000000e+00 2.352941185235977173e-01 2.091958251953125000e+03 1.650669097900390625e+00 4.000000000000000000e+00 2.083852081298828125e+02 5.975000000000000000e+01 5.875000000000000000e+01
6.500000000000000000e+01 6.093000000000000682e+02 2.784435424804687500e+02 -1.391723632812500000e+00 0.000000000000000000e+00 0.000000000000000000e+00 2.103203613281250000e+03 8.277737498283386230e-01 4.000000000000000000e+00 1.695592956542968750e+02 6.025000000000000000e+01 5.875000000000000000e+01
6.500000000000000000e+01 5.923230769230771102e+02 2.827306823730468750e+02 -1.321624755859375000e+00 0.000000000000000000e+00 2.352941185235977173e-01 2.121511230468750000e+03 8.366531729698181152e-01 4.000000000000000000e+00 1.452493591308593750e+02 6.075000000000000000e+01 5.875000000000000000e+01
5.200000000000000000e+01 5.715153846153848463e+02 2.799423522949218750e+02 -1.251495361328125000e+00 0.000000000000000000e+00 0.000000000000000000e+00 2.139819091796875000e+03 8.402698636054992676e-01 4.000000000000000000e+00 9.974253845214843750e+01 6.125000000000000000e+01 5.875000000000000000e+01
3.400000000000000000e+01 5.568615384615379753e+02 2.693306579589843750e+02 -1.091918945312500000e+00 0.000000000000000000e+00 2.352941185235977173e-01 2.175398925781250000e+03 8.464187979698181152e-01 3.000000000000000000e+00 9.687400054931640625e+01 6.225000000000000000e+01 5.875000000000000000e+01
5.800000000000000000e+01 5.481384615384614563e+02 2.685265197753906250e+02 -9.960632324218750000e-01 0.000000000000000000e+00 5.882353186607360840e-01 2.192325683593750000e+03 8.468832969665527344e-01 4.000000000000000000e+00 1.061173858642578125e+02 6.275000000000000000e+01 5.875000000000000000e+01
2.200000000000000000e+01 5.457230769230769738e+02 2.700790100097656250e+02 -9.002075195312500000e-01 0.000000000000000000e+00 0.000000000000000000e+00 2.209252197265625000e+03 8.469933867454528809e-01 3.000000000000000000e+00 1.271916427612304688e+02 6.325000000000000000e+01 5.875000000000000000e+01
9.000000000000000000e+00 5.477384615384614790e+02 2.737886352539062500e+02 -8.043518066406250000e-01 0.000000000000000000e+00 0.000000000000000000e+00 2.226178955078125000e+03 8.466437458992004395e-01 1.000000000000000000e+00 9.450511932373046875e+01 6.375000000000000000e+01 5.875000000000000000e+01
6.000000000000000000e+01 5.460615384615383618e+02 2.771153869628906250e+02 -7.884216308593750000e-01 0.000000000000000000e+00 5.882353186607360840e-01 2.232192382812500000e+03 8.477273583412170410e-01 4.000000000000000000e+00 7.064378356933593750e+01 6.425000000000000000e+01 5.875000000000000000e+01
6.200000000000000000e+01 5.423230769230766555e+02 2.794602050781250000e+02 -7.724609375000000000e-01 0.000000000000000000e+00 0.000000000000000000e+00 2.238206054687500000e+03 8.464688062667846680e-01 4.000000000000000000e+00 8.312651824951171875e+01 6.475000000000000000e+01 5.875000000000000000e+01
7.000000000000000000e+01 5.315923076923077133e+02 2.809816894531250000e+02 -7.565307617187500000e-01 0.000000000000000000e+00 0.000000000000000000e+00 2.244219482421875000e+03 1.390259385108947754e+00 4.000000000000000000e+00 8.624732971191406250e+01 6.525000000000000000e+01 5.875000000000000000e+01
5.000000000000000000e+00 5.287615384615384073e+02 2.801457519531250000e+02 -7.667846679687500000e-01 0.000000000000000000e+00 0.000000000000000000e+00 2.246975341796875000e+03 1.305240631103515625e+00 1.000000000000000000e+00 8.818428802490234375e+01 6.575000000000000000e+01 5.875000000000000000e+01
4.100000000000000000e+01 5.317538461538458705e+02 2.795171203613281250e+02 -8.556518554687500000e-01 0.000000000000000000e+00 2.941176593303680420e-01 2.239958496093750000e+03 1.602842211723327637e+00 3.000000000000000000e+00 7.803895568847656250e+01 6.625000000000000000e+01 5.875000000000000000e+01
4.200000000000000000e+01 5.288692307692308532e+02 2.781909179687500000e+02 -9.445190429687500000e-01 0.000000000000000000e+00 0.000000000000000000e+00 2.232941406250000000e+03 1.394774436950683594e+00 3.000000000000000000e+00 6.088796234130859375e+01 6.675000000000000000e+01 5.875000000000000000e+01
3.100000000000000000e+01 5.396769230769230035e+02 2.774783325195312500e+02 -1.033386230468750000e+00 0.000000000000000000e+00 0.000000000000000000e+00 2.225924560546875000e+03 8.397428989410400391e-01 3.000000000000000000e+00 4.773306655883789062e+01 6.725000000000000000e+01 5.875000000000000000e+01
4.000000000000000000e+00 1.374684615384615427e+03 6.258066406250000000e+02 3.875152587890625000e+00 0.000000000000000000e+00 0.000000000000000000e+00 2.049664306640625000e+03 1.423833250999450684e+00 1.000000000000000000e+00 1.110918457031250000e+03 7.250000000000000000e+00 5.925000000000000000e+01
1.100000000000000000e+01 1.082269230769230944e+03 5.929558715820312500e+02 3.467163085937500000e+00 0.000000000000000000e+00 0.000000000000000000e+00 1.985281738281250000e+03 1.739748716354370117e+00 1.000000000000000000e+00 8.292766113281250000e+02 7.750000000000000000e+00 5.925000000000000000e+01
5.100000000000000000e+01 1.160430769230768874e+03 4.867227783203125000e+02 3.190765380859375000e+00 0.000000000000000000e+00 0.000000000000000000e+00 2.063139892578125000e+03 1.950732111930847168e+00 4.000000000000000000e+00 4.403182678222656250e+02 8.750000000000000000e+00 5.925000000000000000e+01
2.000000000000000000e+01 1.096461538461538112e+03 4.357495727539062500e+02 3.052581787109375000e+00 0.000000000000000000e+00 0.000000000000000000e+00 2.102069091796875000e+03 1.992485880851745605e+00 3.000000000000000000e+00 1.361690216064453125e+02 9.250000000000000000e+00 5.925000000000000000e+01
4.700000000000000000e+01 1.163653846153846189e+03 3.900656433105468750e+02 3.014678955078125000e+00 0.000000000000000000e+00 0.000000000000000000e+00 2.129760498046875000e+03 2.105887651443481445e+00 4.000000000000000000e+00 2.172039947509765625e+02 9.750000000000000000e+00 5.925000000000000000e+01
6.600000000000000000e+01 9.424615384615384528e+02 4.507898559570312500e+02 3.050079345703125000e+00 0.000000000000000000e+00 0.000000000000000000e+00 2.241564453125000000e+03 2.131041049957275391e+00 4.000000000000000000e+00 1.630416259765625000e+02 1.175000000000000000e+01 5.925000000000000000e+01
5.900000000000000000e+01 8.801923076923073950e+02 4.028358154296875000e+02 3.098754882812500000e+00 0.000000000000000000e+00 0.000000000000000000e+00 2.281532470703125000e+03 2.109187364578247070e+00 4.000000000000000000e+00 1.321660614013671875e+02 1.225000000000000000e+01 5.925000000000000000e+01
2.000000000000000000e+01 8.176307692307691468e+02 3.401541137695312500e+02 3.147430419921875000e+00 0.000000000000000000e+00 0.000000000000000000e+00 2.321500732421875000e+03 2.126459121704101562e+00 3.000000000000000000e+00 1.024884262084960938e+02 1.275000000000000000e+01 5.925000000000000000e+01
5.100000000000000000e+01 6.251000000000000227e+02 2.974948730468750000e+02 5.678985595703125000e+00 0.000000000000000000e+00 0.000000000000000000e+00 2.752588378906250000e+03 2.140149831771850586e+00 4.000000000000000000e+00 4.750080871582031250e+01 1.625000000000000000e+01 5.925000000000000000e+01
4.100000000000000000e+01 5.800846153846155175e+02 2.748897094726562500e+02 6.141967773437500000e+00 0.000000000000000000e+00 0.000000000000000000e+00 2.818602294921875000e+03 2.160204410552978516e+00 3.000000000000000000e+00 5.302629470825195312e+01 1.675000000000000000e+01 5.925000000000000000e+01
9.000000000000000000e+00 6.620923076923081680e+02 3.435034179687500000e+02 4.346588134765625000e+00 0.000000000000000000e+00 0.000000000000000000e+00 2.716641601562500000e+03 3.357616186141967773e+00 1.000000000000000000e+00 5.655167770385742188e+01 2.475000000000000000e+01 5.925000000000000000e+01
5.200000000000000000e+01 6.930230769230772694e+02 3.221638488769531250e+02 3.414123535156250000e+00 0.000000000000000000e+00 0.000000000000000000e+00 2.676901367187500000e+03 3.298578262329101562e+00 4.000000000000000000e+00 8.098859405517578125e+01 2.675000000000000000e+01 5.925000000000000000e+01
5.600000000000000000e+01 6.483923076923076678e+02 3.424339904785156250e+02 3.189544677734375000e+00 0.000000000000000000e+00 2.352941185235977173e-01 2.673612060546875000e+03 2.217002153396606445e+00 4.000000000000000000e+00 3.713372421264648438e+01 2.775000000000000000e+01 5.925000000000000000e+01
4.700000000000000000e+01 6.700000000000001137e+02 3.924505004882812500e+02 3.037963867187500000e+00 0.000000000000000000e+00 1.411764740943908691e+00 2.667274169921875000e+03 2.287372350692749023e+00 4.000000000000000000e+00 4.132478332519531250e+01 2.875000000000000000e+01 5.925000000000000000e+01
6.600000000000000000e+01 6.803692307692308532e+02 3.912260742187500000e+02 2.984069824218750000e+00 0.000000000000000000e+00 8.823529481887817383e-01 2.663190673828125000e+03 2.132539510726928711e+00 4.000000000000000000e+00 9.143480682373046875e+01 2.925000000000000000e+01 5.925000000000000000e+01
5.400000000000000000e+01 6.841692307692303530e+02 3.835482482910156250e+02 2.930206298828125000e+00 0.000000000000000000e+00 2.941176593303680420e-01 2.659107177734375000e+03 2.139490842819213867e+00 4.000000000000000000e+00 1.160232086181640625e+02 2.975000000000000000e+01 5.925000000000000000e+01
5.900000000000000000e+01 6.626692307692309214e+02 3.748656921386718750e+02 2.867492675781250000e+00 0.000000000000000000e+00 2.352941185235977173e-01 2.649114013671875000e+03 2.152955770492553711e+00 4.000000000000000000e+00 8.528015899658203125e+01 3.025000000000000000e+01 5.925000000000000000e+01
5.900000000000000000e+01 6.806461538461537657e+02 3.701458129882812500e+02 2.795989990234375000e+00 0.000000000000000000e+00 2.352941185235977173e-01 2.633211181640625000e+03 2.157593250274658203e+00 4.000000000000000000e+00 6.439749145507812500e+01 3.075000000000000000e+01 5.925000000000000000e+01
6.500000000000000000e+01 6.566384615384614563e+02 3.697155761718750000e+02 2.724487304687500000e+00 0.000000000000000000e+00 5.294117927551269531e-01 2.617308349609375000e+03 2.160390377044677734e+00 4.000000000000000000e+00 5.454676437377929688e+01 3.125000000000000000e+01 5.925000000000000000e+01
4.200000000000000000e+01 6.578230769230769965e+02 3.743753662109375000e+02 2.652984619140625000e+00 0.000000000000000000e+00 4.705882370471954346e-01 2.601405517578125000e+03 2.153425455093383789e+00 3.000000000000000000e+00 4.495304107666015625e+01 3.175000000000000000e+01 5.925000000000000000e+01
4.300000000000000000e+01 6.782846153846154493e+02 3.858969421386718750e+02 2.478363037109375000e+00 0.000000000000000000e+00 2.352941185235977173e-01 2.567530517578125000e+03 2.158447027206420898e+00 3.000000000000000000e+00 4.704290008544921875e+01 3.225000000000000000e+01 5.925000000000000000e+01
2.800000000000000000e+01 6.938384615384613880e+02 3.945895690917968750e+02 2.269378662109375000e+00 0.000000000000000000e+00 5.882352963089942932e-02 2.527664794921875000e+03 2.196025848388671875e+00 3.000000000000000000e+00 6.976240539550781250e+01 3.275000000000000000e+01 5.925000000000000000e+01
5.400000000000000000e+01 7.028615384615387711e+02 3.990088806152343750e+02 2.060394287109375000e+00 0.000000000000000000e+00 2.941176593303680420e-01 2.487799072265625000e+03 2.110341072082519531e+00 4.000000000000000000e+00 8.985993194580078125e+01 3.325000000000000000e+01 5.925000000000000000e+01
5.600000000000000000e+01 7.191615384615387256e+02 3.946070251464843750e+02 1.851409912109375000e+00 0.000000000000000000e+00 0.000000000000000000e+00 2.447933349609375000e+03 2.151808500289916992e+00 4.000000000000000000e+00 1.825098419189453125e+02 3.375000000000000000e+01 5.925000000000000000e+01
5.300000000000000000e+01 7.425615384615387029e+02 3.752196350097656250e+02 1.742309570312500000e+00 0.000000000000000000e+00 5.882352963089942932e-02 2.430577392578125000e+03 2.469222068786621094e+00 4.000000000000000000e+00 1.794024505615234375e+02 3.425000000000000000e+01 5.925000000000000000e+01
4.400000000000000000e+01 7.381692307692303530e+02 3.407814025878906250e+02 1.633209228515625000e+00 0.000000000000000000e+00 0.000000000000000000e+00 2.413221679687500000e+03 2.073542833328247070e+00 3.000000000000000000e+00 1.605072479248046875e+02 3.475000000000000000e+01 5.925000000000000000e+01
5.600000000000000000e+01 7.153846153846153584e+02 2.804276123046875000e+02 1.420562744140625000e+00 0.000000000000000000e+00 0.000000000000000000e+00 2.380188476562500000e+03 2.093544006347656250e+00 4.000000000000000000e+00 1.364587402343750000e+02 3.575000000000000000e+01 5.925000000000000000e+01
5.900000000000000000e+01 7.034076923076924004e+02 2.828388671875000000e+02 1.333557128906250000e+00 0.000000000000000000e+00 1.176470592617988586e-01 2.369547851562500000e+03 2.902625799179077148e+00 4.000000000000000000e+00 1.282598266601562500e+02 3.625000000000000000e+01 5.925000000000000000e+01
5.000000000000000000e+00 6.742692307692310578e+02 3.271069641113281250e+02 1.159576416015625000e+00 0.000000000000000000e+00 0.000000000000000000e+00 2.348266601562500000e+03 3.258560419082641602e+00 1.000000000000000000e+00 1.151322860717773438e+02 3.725000000000000000e+01 5.925000000000000000e+01
4.300000000000000000e+01 6.236461538461536520e+02 3.473709411621093750e+02 1.055755615234375000e+00 0.000000000000000000e+00 0.000000000000000000e+00 2.341519775390625000e+03 3.254940509796142578e+00 3.000000000000000000e+00 1.373529052734375000e+02 3.825000000000000000e+01 5.925000000000000000e+01
5.500000000000000000e+01 6.113230769230769965e+02 3.354511718750000000e+02 1.015502929687500000e+00 0.000000000000000000e+00 7.647058963775634766e-01 2.340568603515625000e+03 3.240606307983398438e+00 4.000000000000000000e+00 1.886121368408203125e+02 3.875000000000000000e+01 5.925000000000000000e+01
4.300000000000000000e+01 6.058230769230772239e+02 3.186624450683593750e+02 9.752807617187500000e-01 0.000000000000000000e+00 2.352941185235977173e-01 2.339617675781250000e+03 3.228580474853515625e+00 3.000000000000000000e+00 1.877901458740234375e+02 3.925000000000000000e+01 5.925000000000000000e+01
4.100000000000000000e+01 5.776461538461541068e+02 3.081176452636718750e+02 8.753051757812500000e-01 0.000000000000000000e+00 0.000000000000000000e+00 2.339321777343750000e+03 3.243733882904052734e+00 3.000000000000000000e+00 1.480280303955078125e+02 4.125000000000000000e+01 5.925000000000000000e+01
6.400000000000000000e+01 5.907461538461536747e+02 3.131732788085937500e+02 8.248596191406250000e-01 0.000000000000000000e+00 0.000000000000000000e+00 2.334571044921875000e+03 3.238040447235107422e+00 4.000000000000000000e+00 1.377903594970703125e+02 4.175000000000000000e+01 5.925000000000000000e+01
5.300000000000000000e+01 5.941230769230768374e+02 3.226076049804687500e+02 7.744140625000000000e-01 0.000000000000000000e+00 0.000000000000000000e+00 2.329820068359375000e+03 3.233687162399291992e+00 4.000000000000000000e+00 1.642477569580078125e+02 4.225000000000000000e+01 5.925000000000000000e+01
5.100000000000000000e+01 5.873000000000004093e+02 3.311020202636718750e+02 7.239685058593750000e-01 0.000000000000000000e+00 0.000000000000000000e+00 2.325069335937500000e+03 3.230737686157226562e+00 4.000000000000000000e+00 2.034891662597656250e+02 4.275000000000000000e+01 5.925000000000000000e+01
6.100000000000000000e+01 5.656692307692305803e+02 3.396022338867187500e+02 6.657714843750000000e-01 0.000000000000000000e+00 0.000000000000000000e+00 2.319262939453125000e+03 2.543617486953735352e+00 4.000000000000000000e+00 1.803736267089843750e+02 4.325000000000000000e+01 5.925000000000000000e+01
5.200000000000000000e+01 5.533692307692306258e+02 3.448568115234375000e+02 5.842590332031250000e-01 0.000000000000000000e+00 0.000000000000000000e+00 2.310290039062500000e+03 1.018553495407104492e+00 4.000000000000000000e+00 1.434225158691406250e+02 4.375000000000000000e+01 5.925000000000000000e+01
5.200000000000000000e+01 5.601153846153846416e+02 3.490783996582031250e+02 5.027465820312500000e-01 0.000000000000000000e+00 0.000000000000000000e+00 2.301317382812500000e+03 8.509114384651184082e-01 4.000000000000000000e+00 1.751923675537109375e+02 4.425000000000000000e+01 5.925000000000000000e+01
5.400000000000000000e+01 5.723923076923074404e+02 3.510656738281250000e+02 4.212646484375000000e-01 0.000000000000000000e+00 0.000000000000000000e+00 2.292344482421875000e+03 8.930989503860473633e-01 4.000000000000000000e+00 1.676926574707031250e+02 4.475000000000000000e+01 5.925000000000000000e+01
6.300000000000000000e+01 5.971692307692309214e+02 3.530091552734375000e+02 3.562927246093750000e-01 0.000000000000000000e+00 0.000000000000000000e+00 2.284591552734375000e+03 8.528181314468383789e-01 4.000000000000000000e+00 1.869293212890625000e+02 4.525000000000000000e+01 5.925000000000000000e+01
6.200000000000000000e+01 6.247384615384615927e+02 3.535592041015625000e+02 3.079223632812500000e-01 0.000000000000000000e+00 0.000000000000000000e+00 2.278058593750000000e+03 8.539854288101196289e-01 4.000000000000000000e+00 2.067443389892578125e+02 4.575000000000000000e+01 5.925000000000000000e+01
4.100000000000000000e+01 6.140923076923071449e+02 3.526661987304687500e+02 2.595214843750000000e-01 0.000000000000000000e+00 0.000000000000000000e+00 2.271525634765625000e+03 1.301222562789916992e+00 3.000000000000000000e+00 2.093155059814453125e+02 4.625000000000000000e+01 5.925000000000000000e+01
5.500000000000000000e+01 6.176846153846151992e+02 3.543083190917968750e+02 2.111206054687500000e-01 0.000000000000000000e+00 0.000000000000000000e+00 2.264992431640625000e+03 2.173421144485473633e+00 4.000000000000000000e+00 1.532863616943359375e+02 4.675000000000000000e+01 5.925000000000000000e+01
6.900000000000000000e+01 6.135230769230769283e+02 3.580564270019531250e+02 1.929626464843750000e-01 0.000000000000000000e+00 2.941176593303680420e-01 2.262479980468750000e+03 2.109743356704711914e+00 4.000000000000000000e+00 2.024979400634765625e+02 4.725000000000000000e+01 5.925000000000000000e+01
6.400000000000000000e+01 6.379538461538462570e+02 3.713827819824218750e+02 1.767578125000000000e-01 0.000000000000000000e+00 0.000000000000000000e+00 2.260134765625000000e+03 2.111278533935546875e+00 4.000000000000000000e+00 1.726443939208984375e+02 4.825000000000000000e+01 5.925000000000000000e+01
4.600000000000000000e+01 6.385384615384615472e+02 3.757373352050781250e+02 1.686706542968750000e-01 0.000000000000000000e+00 0.000000000000000000e+00 2.258962402343750000e+03 2.056330680847167969e+00 4.000000000000000000e+00 1.867737274169921875e+02 4.875000000000000000e+01 5.925000000000000000e+01
5.900000000000000000e+01 6.382692307692307168e+02 3.769779663085937500e+02 1.813659667968750000e-01 0.000000000000000000e+00 0.000000000000000000e+00 2.259540283203125000e+03 9.849424958229064941e-01 4.000000000000000000e+00 1.849240570068359375e+02 4.925000000000000000e+01 5.925000000000000000e+01
7.000000000000000000e+01 6.362000000000002728e+02 3.778041687011718750e+02 1.940917968750000000e-01 0.000000000000000000e+00 0.000000000000000000e+00 2.260117919921875000e+03 9.472705721855163574e-01 4.000000000000000000e+00 1.581239013671875000e+02 4.975000000000000000e+01 5.925000000000000000e+01
6.400000000000000000e+01 6.362384615384614790e+02 3.767717895507812500e+02 2.067871093750000000e-01 0.000000000000000000e+00 0.000000000000000000e+00 2.260695800781250000e+03 1.628709554672241211e+00 4.000000000000000000e+00 2.043951568603515625e+02 5.025000000000000000e+01 5.925000000000000000e+01
5.500000000000000000e+01 6.336307692307692605e+02 3.669751892089843750e+02 1.637268066406250000e-01 0.000000000000000000e+00 0.000000000000000000e+00 2.249840820312500000e+03 1.387392997741699219e+00 4.000000000000000000e+00 1.451072845458984375e+02 5.125000000000000000e+01 5.925000000000000000e+01
3.900000000000000000e+01 6.314538461538461434e+02 3.592610168457031250e+02 1.216735839843750000e-01 0.000000000000000000e+00 0.000000000000000000e+00 2.240810302734375000e+03 1.896001458168029785e+00 3.000000000000000000e+00 1.984318237304687500e+02 5.175000000000000000e+01 5.925000000000000000e+01
5.600000000000000000e+01 6.308923076923080089e+02 3.540403137207031250e+02 7.962036132812500000e-02 0.000000000000000000e+00 0.000000000000000000e+00 2.231779785156250000e+03 1.387900471687316895e+00 4.000000000000000000e+00 1.894092102050781250e+02 5.225000000000000000e+01 5.925000000000000000e+01
6.300000000000000000e+01 6.365769230769229807e+02 3.476006469726562500e+02 1.251220703125000000e-03 0.000000000000000000e+00 5.294117927551269531e-01 2.217966308593750000e+03 1.186849355697631836e+00 4.000000000000000000e+00 2.036829528808593750e+02 5.275000000000000000e+01 5.925000000000000000e+01
6.800000000000000000e+01 6.446076923076924459e+02 3.379951782226562500e+02 -1.134338378906250000e-01 0.000000000000000000e+00 0.000000000000000000e+00 2.199370361328125000e+03 2.039772272109985352e+00 4.000000000000000000e+00 2.928047485351562500e+02 5.325000000000000000e+01 5.925000000000000000e+01
6.800000000000000000e+01 6.576923076923077360e+02 3.325545349121093750e+02 -2.281188964843750000e-01 0.000000000000000000e+00 0.000000000000000000e+00 2.180774414062500000e+03 2.042809486389160156e+00 4.000000000000000000e+00 2.949500427246093750e+02 5.375000000000000000e+01 5.925000000000000000e+01
7.100000000000000000e+01 6.851307692307689194e+02 3.340773925781250000e+02 -7.190856933593750000e-01 0.000000000000000000e+00 0.000000000000000000e+00 2.118138671875000000e+03 1.792225837707519531e+00 4.000000000000000000e+00 1.867568511962890625e+02 5.525000000000000000e+01 5.925000000000000000e+01
6.100000000000000000e+01 6.955461538461538566e+02 3.385348205566406250e+02 -9.177551269531250000e-01 0.000000000000000000e+00 0.000000000000000000e+00 2.095629394531250000e+03 2.054423332214355469e+00 4.000000000000000000e+00 1.905123443603515625e+02 5.575000000000000000e+01 5.925000000000000000e+01
6.000000000000000000e+01 7.020153846153843915e+02 3.616456298828125000e+02 -1.259277343750000000e+00 0.000000000000000000e+00 0.000000000000000000e+00 2.058744384765625000e+03 2.043843984603881836e+00 4.000000000000000000e+00 1.420536041259765625e+02 5.675000000000000000e+01 5.925000000000000000e+01
5.500000000000000000e+01 7.060846153846152902e+02 3.735419921875000000e+02 -1.402160644531250000e+00 0.000000000000000000e+00 0.000000000000000000e+00 2.044368408203125000e+03 2.015922307968139648e+00 4.000000000000000000e+00 1.839932098388671875e+02 5.725000000000000000e+01 5.925000000000000000e+01
6.700000000000000000e+01 7.012999999999999545e+02 3.691727600097656250e+02 -1.545043945312500000e+00 9.999999776482582092e-03 0.000000000000000000e+00 2.029992431640625000e+03 1.964912295341491699e+00 4.000000000000000000e+00 3.284072875976562500e+02 5.775000000000000000e+01 5.925000000000000000e+01
5.800000000000000000e+01 6.996076923076925596e+02 3.312251281738281250e+02 -1.661163330078125000e+00 9.999999776482582092e-03 0.000000000000000000e+00 2.020020019531250000e+03 1.906857371330261230e+00 4.000000000000000000e+00 5.906577148437500000e+02 5.825000000000000000e+01 5.925000000000000000e+01
1.900000000000000000e+01 6.952230769230767464e+02 2.971867675781250000e+02 -1.696990966796875000e+00 1.331391036510467529e-01 0.000000000000000000e+00 2.023258666992187500e+03 1.847176909446716309e+00 1.000000000000000000e+00 5.922285156250000000e+02 5.875000000000000000e+01 5.925000000000000000e+01
6.300000000000000000e+01 6.604461538461536065e+02 2.795592956542968750e+02 -1.732788085937500000e+00 9.999999776482582092e-03 0.000000000000000000e+00 2.026497192382812500e+03 9.401349425315856934e-01 4.000000000000000000e+00 4.118330383300781250e+02 5.925000000000000000e+01 5.925000000000000000e+01
7.300000000000000000e+01 6.126538461538459615e+02 2.731212158203125000e+02 -1.768615722656250000e+00 0.000000000000000000e+00 0.000000000000000000e+00 2.029735717773437500e+03 7.986465096473693848e-01 4.000000000000000000e+00 2.359416656494140625e+02 5.975000000000000000e+01 5.925000000000000000e+01
6.600000000000000000e+01 5.855538461538458250e+02 2.751499938964843750e+02 -1.746643066406250000e+00 0.000000000000000000e+00 0.000000000000000000e+00 2.040543579101562500e+03 8.206409811973571777e-01 4.000000000000000000e+00 1.262553253173828125e+02 6.025000000000000000e+01 5.925000000000000000e+01
3.900000000000000000e+01 5.749692307692309896e+02 2.754980773925781250e+02 -1.666931152343750000e+00 0.000000000000000000e+00 0.000000000000000000e+00 2.058920654296875000e+03 8.270869255065917969e-01 3.000000000000000000e+00 1.384767608642578125e+02 6.075000000000000000e+01 5.925000000000000000e+01
6.500000000000000000e+01 5.645538461538459387e+02 2.714417724609375000e+02 -1.587188720703125000e+00 0.000000000000000000e+00 2.352941185235977173e-01 2.077297607421875000e+03 1.008882403373718262e+00 4.000000000000000000e+00 8.678304290771484375e+01 6.125000000000000000e+01 5.925000000000000000e+01
3.300000000000000000e+01 5.515692307692306713e+02 2.558497924804687500e+02 -1.406433105468750000e+00 0.000000000000000000e+00 2.352941185235977173e-01 2.112762207031250000e+03 8.352748751640319824e-01 3.000000000000000000e+00 6.806597900390625000e+01 6.225000000000000000e+01 5.925000000000000000e+01
6.900000000000000000e+01 5.471538461538459615e+02 2.525864105224609375e+02 -1.298309326171875000e+00 0.000000000000000000e+00 0.000000000000000000e+00 2.129419677734375000e+03 8.345486521720886230e-01 4.000000000000000000e+00 1.229303436279296875e+02 6.275000000000000000e+01 5.925000000000000000e+01
6.600000000000000000e+01 5.457846153846155630e+02 2.521661834716796875e+02 -1.190155029296875000e+00 0.000000000000000000e+00 0.000000000000000000e+00 2.146077148437500000e+03 8.369238972663879395e-01 4.000000000000000000e+00 9.529514312744140625e+01 6.325000000000000000e+01 5.925000000000000000e+01
6.600000000000000000e+01 5.445692307692307850e+02 2.518495788574218750e+02 -1.082000732421875000e+00 0.000000000000000000e+00 0.000000000000000000e+00 2.162734619140625000e+03 1.254956126213073730e+00 4.000000000000000000e+00 8.166084289550781250e+01 6.375000000000000000e+01 5.925000000000000000e+01
6.600000000000000000e+01 5.459076923076925141e+02 2.533191375732421875e+02 -1.057891845703125000e+00 0.000000000000000000e+00 5.294117927551269531e-01 2.168321289062500000e+03 1.249271750450134277e+00 4.000000000000000000e+00 7.611502075195312500e+01 6.425000000000000000e+01 5.925000000000000000e+01
6.500000000000000000e+01 5.455846153846152902e+02 2.567887573242187500e+02 -1.033782958984375000e+00 0.000000000000000000e+00 0.000000000000000000e+00 2.173908203125000000e+03 9.028515219688415527e-01 4.000000000000000000e+00 8.358290100097656250e+01 6.475000000000000000e+01 5.925000000000000000e+01
1.200000000000000000e+01 5.369230769230770193e+02 2.618778991699218750e+02 -1.012542724609375000e+00 0.000000000000000000e+00 0.000000000000000000e+00 2.182029296875000000e+03 8.376339673995971680e-01 1.000000000000000000e+00 9.004496002197265625e+01 6.575000000000000000e+01 5.925000000000000000e+01
1.400000000000000000e+01 5.379153846153848235e+02 2.643868103027343750e+02 -1.096313476562500000e+00 0.000000000000000000e+00 5.882352963089942932e-02 2.175406738281250000e+03 1.446545124053955078e+00 1.000000000000000000e+00 5.582069015502929688e+01 6.625000000000000000e+01 5.925000000000000000e+01
2.700000000000000000e+01 5.463769230769232763e+02 2.660043640136718750e+02 -1.180084228515625000e+00 0.000000000000000000e+00 0.000000000000000000e+00 2.168783935546875000e+03 1.225149035453796387e+00 3.000000000000000000e+00 4.632937240600585938e+01 6.675000000000000000e+01 5.925000000000000000e+01
1.800000000000000000e+01 5.437461538461536747e+02 2.716589050292968750e+02 -1.263854980468750000e+00 0.000000000000000000e+00 0.000000000000000000e+00 2.162161132812500000e+03 8.293489813804626465e-01 1.000000000000000000e+00 4.406540298461914062e+01 6.725000000000000000e+01 5.925000000000000000e+01
1.000000000000000000e+01 1.145592307692307486e+03 6.237656250000000000e+02 2.063293457031250000e+00 9.999999776482582092e-03 0.000000000000000000e+00 1.589417968750000000e+03 1.295000791549682617e+00 1.000000000000000000e+00 1.145734375000000000e+03 7.250000000000000000e+00 5.975000000000000000e+01
1.700000000000000000e+01 9.068692307692306258e+02 5.580494995117187500e+02 1.560302734375000000e+00 0.000000000000000000e+00 0.000000000000000000e+00 1.517031982421875000e+03 1.399147629737854004e+00 1.000000000000000000e+00 1.096147949218750000e+03 7.750000000000000000e+00 5.975000000000000000e+01
1.200000000000000000e+01 8.042846153846149946e+02 4.828257751464843750e+02 1.442932128906250000e+00 0.000000000000000000e+00 0.000000000000000000e+00 1.589395996093750000e+03 1.562691688537597656e+00 1.000000000000000000e+00 1.040684326171875000e+03 8.250000000000000000e+00 5.975000000000000000e+01
1.800000000000000000e+01 9.338307692307691923e+02 4.466434936523437500e+02 1.325561523437500000e+00 0.000000000000000000e+00 0.000000000000000000e+00 1.661759887695312500e+03 1.643184065818786621e+00 1.000000000000000000e+00 8.346495971679687500e+02 8.750000000000000000e+00 5.975000000000000000e+01
2.200000000000000000e+01 9.491230769230763826e+02 4.315982666015625000e+02 1.208190917968750000e+00 0.000000000000000000e+00 0.000000000000000000e+00 1.734123901367187500e+03 1.800094485282897949e+00 3.000000000000000000e+00 6.085256958007812500e+02 9.250000000000000000e+00 5.975000000000000000e+01
5.300000000000000000e+01 1.063100000000000136e+03 4.193547363281250000e+02 1.204162597656250000e+00 0.000000000000000000e+00 0.000000000000000000e+00 1.780917358398437500e+03 1.948499798774719238e+00 4.000000000000000000e+00 2.864670715332031250e+02 9.750000000000000000e+00 5.975000000000000000e+01
4.700000000000000000e+01 8.539153846153848235e+02 4.495711364746093750e+02 1.305389404296875000e+00 0.000000000000000000e+00 0.000000000000000000e+00 1.895727294921875000e+03 2.110547780990600586e+00 4.000000000000000000e+00 1.417038726806640625e+02 1.125000000000000000e+01 5.975000000000000000e+01
5.100000000000000000e+01 8.458384615384619565e+02 4.374701538085937500e+02 1.489288330078125000e+00 0.000000000000000000e+00 0.000000000000000000e+00 1.951083007812500000e+03 2.066071748733520508e+00 4.000000000000000000e+00 2.213293609619140625e+02 1.175000000000000000e+01 5.975000000000000000e+01
1.400000000000000000e+01 8.227307692307688285e+02 4.103155822753906250e+02 1.673217773437500000e+00 0.000000000000000000e+00 0.000000000000000000e+00 2.006438842773437500e+03 2.047440290451049805e+00 1.000000000000000000e+00 1.357560119628906250e+02 1.225000000000000000e+01 5.975000000000000000e+01
2.800000000000000000e+01 8.407384615384621611e+02 3.611687622070312500e+02 1.857147216796875000e+00 0.000000000000000000e+00 0.000000000000000000e+00 2.061794433593750000e+03 2.058076381683349609e+00 3.000000000000000000e+00 2.991950683593750000e+02 1.275000000000000000e+01 5.975000000000000000e+01
2.600000000000000000e+01 7.995230769230767010e+02 3.001259155273437500e+02 2.105529785156250000e+00 0.000000000000000000e+00 0.000000000000000000e+00 2.122490478515625000e+03 2.067430019378662109e+00 3.000000000000000000e+00 1.110279769897460938e+02 1.325000000000000000e+01 5.975000000000000000e+01
5.800000000000000000e+01 7.898384615384613880e+02 2.738620605468750000e+02 2.547424316406250000e+00 0.000000000000000000e+00 0.000000000000000000e+00 2.199206787109375000e+03 2.047230243682861328e+00 4.000000000000000000e+00 2.711404724121093750e+02 1.375000000000000000e+01 5.975000000000000000e+01
5.600000000000000000e+01 7.920384615384608651e+02 2.859795837402343750e+02 2.989288330078125000e+00 0.000000000000000000e+00 0.000000000000000000e+00 2.275922851562500000e+03 2.021943569183349609e+00 4.000000000000000000e+00 2.262401123046875000e+02 1.425000000000000000e+01 5.975000000000000000e+01
5.200000000000000000e+01 7.930615384615388166e+02 3.106563415527343750e+02 3.431182861328125000e+00 0.000000000000000000e+00 0.000000000000000000e+00 2.352639160156250000e+03 2.010381460189819336e+00 4.000000000000000000e+00 1.921233520507812500e+02 1.475000000000000000e+01 5.975000000000000000e+01
5.400000000000000000e+01 7.614230769230770193e+02 3.149978637695312500e+02 3.898101806640625000e+00 0.000000000000000000e+00 0.000000000000000000e+00 2.432625488281250000e+03 2.006655454635620117e+00 4.000000000000000000e+00 1.997443389892578125e+02 1.525000000000000000e+01 5.975000000000000000e+01
4.900000000000000000e+01 6.755076923076923094e+02 2.985695800781250000e+02 4.390045166015625000e+00 0.000000000000000000e+00 0.000000000000000000e+00 2.515881591796875000e+03 2.030035734176635742e+00 4.000000000000000000e+00 1.199128570556640625e+02 1.575000000000000000e+01 5.975000000000000000e+01
5.800000000000000000e+01 6.084000000000000909e+02 2.754921875000000000e+02 4.882019042968750000e+00 0.000000000000000000e+00 0.000000000000000000e+00 2.599137695312500000e+03 2.069529056549072266e+00 4.000000000000000000e+00 9.389636993408203125e+01 1.625000000000000000e+01 5.975000000000000000e+01
1.100000000000000000e+01 5.654615384615383391e+02 2.519029693603515625e+02 5.373962402343750000e+00 0.000000000000000000e+00 0.000000000000000000e+00 2.682394042968750000e+03 5.512807965278625488e-01 1.000000000000000000e+00 5.451675415039062500e+01 1.675000000000000000e+01 5.975000000000000000e+01
1.500000000000000000e+01 5.084769230769230717e+02 1.970575561523437500e+02 6.568420410156250000e+00 0.000000000000000000e+00 0.000000000000000000e+00 2.803108398437500000e+03 2.163510799407958984e+00 1.000000000000000000e+00 3.629520797729492188e+01 1.825000000000000000e+01 5.975000000000000000e+01
5.800000000000000000e+01 6.774153846153844825e+02 3.754492492675781250e+02 2.647338867187500000e+00 0.000000000000000000e+00 0.000000000000000000e+00 2.593586669921875000e+03 2.138597011566162109e+00 4.000000000000000000e+00 9.912406921386718750e+01 2.975000000000000000e+01 5.975000000000000000e+01
3.000000000000000000e+01 6.669230769230767919e+02 3.690770568847656250e+02 2.509277343750000000e+00 0.000000000000000000e+00 2.941176593303680420e-01 2.567660400390625000e+03 2.144701480865478516e+00 3.000000000000000000e+00 5.713366317749023438e+01 3.125000000000000000e+01 5.975000000000000000e+01
4.800000000000000000e+01 6.638769230769230489e+02 3.943950500488281250e+02 2.301483154296875000e+00 0.000000000000000000e+00 5.882352963089942932e-02 2.528597900390625000e+03 2.340885162353515625e+00 4.000000000000000000e+00 3.581330108642578125e+01 3.225000000000000000e+01 5.975000000000000000e+01
2.200000000000000000e+01 6.659692307692306485e+02 4.111958312988281250e+02 1.893615722656250000e+00 0.000000000000000000e+00 5.882352963089942932e-02 2.455085449218750000e+03 2.129115819931030273e+00 3.000000000000000000e+00 5.055902481079101562e+01 3.325000000000000000e+01 5.975000000000000000e+01
5.600000000000000000e+01 6.816923076923080771e+02 4.093297424316406250e+02 1.689666748046875000e+00 0.000000000000000000e+00 0.000000000000000000e+00 2.418329101562500000e+03 2.083096027374267578e+00 4.000000000000000000e+00 7.741657257080078125e+01 3.375000000000000000e+01 5.975000000000000000e+01
4.900000000000000000e+01 7.423230769230768828e+02 3.908808288574218750e+02 1.591552734375000000e+00 0.000000000000000000e+00 0.000000000000000000e+00 2.399346435546875000e+03 2.054470062255859375e+00 4.000000000000000000e+00 1.572490386962890625e+02 3.425000000000000000e+01 5.975000000000000000e+01
6.000000000000000000e+01 7.552461538461543569e+02 3.541759033203125000e+02 1.493438720703125000e+00 0.000000000000000000e+00 0.000000000000000000e+00 2.380363525390625000e+03 2.706966161727905273e+00 4.000000000000000000e+00 2.063688507080078125e+02 3.475000000000000000e+01 5.975000000000000000e+01
2.400000000000000000e+01 7.421923076923079634e+02 3.123930053710937500e+02 1.395324707031250000e+00 0.000000000000000000e+00 5.882352963089942932e-02 2.361380859375000000e+03 2.837276458740234375e+00 3.000000000000000000e+00 1.854643859863281250e+02 3.525000000000000000e+01 5.975000000000000000e+01
4.600000000000000000e+01 7.324769230769228443e+02 2.843409118652343750e+02 1.300872802734375000e+00 0.000000000000000000e+00 0.000000000000000000e+00 2.344723632812500000e+03 2.795631885528564453e+00 4.000000000000000000e+00 1.972729797363281250e+02 3.575000000000000000e+01 5.975000000000000000e+01
5.300000000000000000e+01 7.141923076923068265e+02 2.813888854980468750e+02 1.217376708984375000e+00 0.000000000000000000e+00 0.000000000000000000e+00 2.335043701171875000e+03 2.113320589065551758e+00 4.000000000000000000e+00 1.469212493896484375e+02 3.625000000000000000e+01 5.975000000000000000e+01
6.600000000000000000e+01 7.002384615384617064e+02 3.101948852539062500e+02 1.050323486328125000e+00 0.000000000000000000e+00 0.000000000000000000e+00 2.315683593750000000e+03 3.210835456848144531e+00 4.000000000000000000e+00 2.258046264648437500e+02 3.725000000000000000e+01 5.975000000000000000e+01
5.100000000000000000e+01 6.674769230769232990e+02 3.212620849609375000e+02 9.822082519531250000e-01 0.000000000000000000e+00 0.000000000000000000e+00 2.308833251953125000e+03 3.211398363113403320e+00 4.000000000000000000e+00 1.491415405273437500e+02 3.775000000000000000e+01 5.975000000000000000e+01
6.200000000000000000e+01 6.310461538461539703e+02 3.252717590332031250e+02 9.294433593750000000e-01 0.000000000000000000e+00 0.000000000000000000e+00 2.304812500000000000e+03 3.217738389968872070e+00 4.000000000000000000e+00 1.414858093261718750e+02 3.825000000000000000e+01 5.975000000000000000e+01
3.000000000000000000e+01 6.079538461538463707e+02 3.254075012207031250e+02 8.766784667968750000e-01 0.000000000000000000e+00 5.882352963089942932e-02 2.300791748046875000e+03 3.217080593109130859e+00 3.000000000000000000e+00 1.247511596679687500e+02 3.875000000000000000e+01 5.975000000000000000e+01
1.100000000000000000e+01 5.742384615384615927e+02 3.228860168457031250e+02 7.796630859375000000e-01 0.000000000000000000e+00 0.000000000000000000e+00 2.294462158203125000e+03 3.208873510360717773e+00 1.000000000000000000e+00 1.282162628173828125e+02 3.975000000000000000e+01 5.975000000000000000e+01
6.500000000000000000e+01 5.808307692307690786e+02 3.243572692871093750e+02 7.382812500000000000e-01 0.000000000000000000e+00 0.000000000000000000e+00 2.292724365234375000e+03 3.198014259338378906e+00 4.000000000000000000e+00 1.671595916748046875e+02 4.025000000000000000e+01 5.975000000000000000e+01
6.600000000000000000e+01 5.936769230769233445e+02 3.269596557617187500e+02 6.968688964843750000e-01 0.000000000000000000e+00 0.000000000000000000e+00 2.290986328125000000e+03 3.191374063491821289e+00 4.000000000000000000e+00 1.874630584716796875e+02 4.075000000000000000e+01 5.975000000000000000e+01
6.900000000000000000e+01 5.919615384615384528e+02 3.291739501953125000e+02 6.554870605468750000e-01 0.000000000000000000e+00 0.000000000000000000e+00 2.289248535156250000e+03 3.191165924072265625e+00 4.000000000000000000e+00 1.940180358886718750e+02 4.125000000000000000e+01 5.975000000000000000e+01
6.000000000000000000e+01 5.924230769230769056e+02 3.307428588867187500e+02 5.942993164062500000e-01 0.000000000000000000e+00 0.000000000000000000e+00 2.283061523437500000e+03 3.159600257873535156e+00 4.000000000000000000e+00 1.976416168212890625e+02 4.175000000000000000e+01 5.975000000000000000e+01
6.600000000000000000e+01 5.949307692307695561e+02 3.337185974121093750e+02 5.331115722656250000e-01 0.000000000000000000e+00 0.000000000000000000e+00 2.276874755859375000e+03 3.199962139129638672e+00 4.000000000000000000e+00 1.450078125000000000e+02 4.225000000000000000e+01 5.975000000000000000e+01
5.600000000000000000e+01 5.973769230769231626e+02 3.361359863281250000e+02 4.719238281250000000e-01 0.000000000000000000e+00 0.000000000000000000e+00 2.270687988281250000e+03 1.799903035163879395e+00 4.000000000000000000e+00 1.378377532958984375e+02 4.275000000000000000e+01 5.975000000000000000e+01
4.700000000000000000e+01 5.996076923076922185e+02 3.404320678710937500e+02 4.071960449218750000e-01 0.000000000000000000e+00 0.000000000000000000e+00 2.264003173828125000e+03 2.297886371612548828e+00 4.000000000000000000e+00 1.740336456298828125e+02 4.325000000000000000e+01 5.975000000000000000e+01
6.700000000000000000e+01 6.046153846153847553e+02 3.443883056640625000e+02 3.318481445312500000e-01 0.000000000000000000e+00 0.000000000000000000e+00 2.255824951171875000e+03 1.604277014732360840e+00 4.000000000000000000e+00 1.733116455078125000e+02 4.375000000000000000e+01 5.975000000000000000e+01
3.000000000000000000e+01 6.115153846153845052e+02 3.492558593750000000e+02 2.564697265625000000e-01 0.000000000000000000e+00 0.000000000000000000e+00 2.247646728515625000e+03 1.379498481750488281e+00 3.000000000000000000e+00 2.043952789306640625e+02 4.425000000000000000e+01 5.975000000000000000e+01
1.700000000000000000e+01 6.228307692307689649e+02 3.529748840332031250e+02 1.810913085937500000e-01 0.000000000000000000e+00 0.000000000000000000e+00 2.239468505859375000e+03 1.907589435577392578e+00 1.000000000000000000e+00 2.249672241210937500e+02 4.475000000000000000e+01 5.975000000000000000e+01
9.000000000000000000e+00 6.182384615384613653e+02 3.563951110839843750e+02 1.214599609375000000e-01 0.000000000000000000e+00 2.352941185235977173e-01 2.232255615234375000e+03 1.207966685295104980e+00 1.000000000000000000e+00 1.638613128662109375e+02 4.525000000000000000e+01 5.975000000000000000e+01
4.900000000000000000e+01 6.387384615384612516e+02 3.575317077636718750e+02 7.757568359375000000e-02 0.000000000000000000e+00 0.000000000000000000e+00 2.226008300781250000e+03 8.377437591552734375e-01 4.000000000000000000e+00 1.710991668701171875e+02 4.575000000000000000e+01 5.975000000000000000e+01
6.500000000000000000e+01 6.192692307692307168e+02 3.579077453613281250e+02 3.366088867187500000e-02 0.000000000000000000e+00 0.000000000000000000e+00 2.219760986328125000e+03 8.376969695091247559e-01 4.000000000000000000e+00 1.955021209716796875e+02 4.625000000000000000e+01 5.975000000000000000e+01
4.200000000000000000e+01 6.173307692307693060e+02 3.611063842773437500e+02 -1.022338867187500000e-02 0.000000000000000000e+00 0.000000000000000000e+00 2.213513671875000000e+03 1.580150961875915527e+00 3.000000000000000000e+00 1.867767944335937500e+02 4.675000000000000000e+01 5.975000000000000000e+01
7.000000000000000000e+01 6.170769230769230944e+02 3.650166625976562500e+02 -2.590942382812500000e-02 0.000000000000000000e+00 0.000000000000000000e+00 2.211062988281250000e+03 2.063648462295532227e+00 4.000000000000000000e+00 1.922242279052734375e+02 4.725000000000000000e+01 5.975000000000000000e+01
6.500000000000000000e+01 6.231923076923076223e+02 3.694328308105468750e+02 -3.219604492187500000e-02 0.000000000000000000e+00 0.000000000000000000e+00 2.209877929687500000e+03 2.072324514389038086e+00 4.000000000000000000e+00 1.792592620849609375e+02 4.775000000000000000e+01 5.975000000000000000e+01
6.500000000000000000e+01 6.258461538461540385e+02 3.711706542968750000e+02 -3.851318359375000000e-02 0.000000000000000000e+00 0.000000000000000000e+00 2.208692871093750000e+03 2.075949907302856445e+00 4.000000000000000000e+00 1.948575439453125000e+02 4.825000000000000000e+01 5.975000000000000000e+01
6.800000000000000000e+01 6.312538461538463253e+02 3.714930114746093750e+02 -4.479980468750000000e-02 0.000000000000000000e+00 0.000000000000000000e+00 2.207507812500000000e+03 2.073783874511718750e+00 4.000000000000000000e+00 1.794627685546875000e+02 4.875000000000000000e+01 5.975000000000000000e+01
7.300000000000000000e+01 6.378538461538458932e+02 3.687160034179687500e+02 -4.327392578125000000e-02 0.000000000000000000e+00 0.000000000000000000e+00 2.206447998046875000e+03 1.555346250534057617e+00 4.000000000000000000e+00 1.858518829345703125e+02 4.925000000000000000e+01 5.975000000000000000e+01
6.300000000000000000e+01 6.388923076923076678e+02 3.670195922851562500e+02 -4.177856445312500000e-02 0.000000000000000000e+00 0.000000000000000000e+00 2.205388183593750000e+03 8.424676060676574707e-01 4.000000000000000000e+00 1.898158569335937500e+02 4.975000000000000000e+01 5.975000000000000000e+01
6.800000000000000000e+01 6.347692307692306031e+02 3.661878356933593750e+02 -4.028320312500000000e-02 0.000000000000000000e+00 0.000000000000000000e+00 2.204328369140625000e+03 8.399496674537658691e-01 4.000000000000000000e+00 2.138897399902343750e+02 5.025000000000000000e+01 5.975000000000000000e+01
6.500000000000000000e+01 6.367230769230767464e+02 3.685348510742187500e+02 -5.181884765625000000e-02 0.000000000000000000e+00 0.000000000000000000e+00 2.201058593750000000e+03 8.398447036743164062e-01 4.000000000000000000e+00 1.621697235107421875e+02 5.075000000000000000e+01 5.975000000000000000e+01
7.600000000000000000e+01 6.403076923076920366e+02 3.704535827636718750e+02 -1.024780273437500000e-01 0.000000000000000000e+00 0.000000000000000000e+00 2.191159179687500000e+03 1.379083871841430664e+00 4.000000000000000000e+00 1.756256561279296875e+02 5.125000000000000000e+01 5.975000000000000000e+01
4.600000000000000000e+01 6.326230769230770647e+02 3.703408813476562500e+02 -2.037658691406250000e-01 0.000000000000000000e+00 0.000000000000000000e+00 2.171360107421875000e+03 1.684185624122619629e+00 4.000000000000000000e+00 1.720238037109375000e+02 5.225000000000000000e+01 5.975000000000000000e+01
2.300000000000000000e+01 6.315692307692304439e+02 3.666850891113281250e+02 -2.939758300781250000e-01 0.000000000000000000e+00 2.352941185235977173e-01 2.157106689453125000e+03 2.046715974807739258e+00 3.000000000000000000e+00 1.608884277343750000e+02 5.275000000000000000e+01 5.975000000000000000e+01
5.400000000000000000e+01 6.436769230769234582e+02 3.610465393066406250e+02 -4.237670898437500000e-01 0.000000000000000000e+00 0.000000000000000000e+00 2.138499755859375000e+03 2.035193204879760742e+00 4.000000000000000000e+00 1.967190399169921875e+02 5.325000000000000000e+01 5.975000000000000000e+01
6.200000000000000000e+01 6.594307692307689877e+02 3.537865600585937500e+02 -5.535278320312500000e-01 0.000000000000000000e+00 0.000000000000000000e+00 2.119892578125000000e+03 2.026608467102050781e+00 4.000000000000000000e+00 2.348990173339843750e+02 5.375000000000000000e+01 5.975000000000000000e+01
4.000000000000000000e+01 6.648384615384612744e+02 3.508114624023437500e+02 -6.833190917968750000e-01 0.000000000000000000e+00 0.000000000000000000e+00 2.101285644531250000e+03 2.029144048690795898e+00 3.000000000000000000e+00 2.060979766845703125e+02 5.425000000000000000e+01 5.975000000000000000e+01
5.900000000000000000e+01 6.778538461538456659e+02 3.535343933105468750e+02 -8.710937500000000000e-01 0.000000000000000000e+00 0.000000000000000000e+00 2.080380859375000000e+03 2.031786680221557617e+00 4.000000000000000000e+00 1.653184509277343750e+02 5.475000000000000000e+01 5.975000000000000000e+01
5.600000000000000000e+01 6.925153846153845052e+02 3.631172180175781250e+02 -1.078216552734375000e+00 0.000000000000000000e+00 0.000000000000000000e+00 2.058710205078125000e+03 1.559407711029052734e+00 4.000000000000000000e+00 1.897109222412109375e+02 5.525000000000000000e+01 5.975000000000000000e+01
6.500000000000000000e+01 7.034999999999998863e+02 3.756567687988281250e+02 -1.285369873046875000e+00 0.000000000000000000e+00 0.000000000000000000e+00 2.037039672851562500e+03 1.737623214721679688e+00 4.000000000000000000e+00 1.666663818359375000e+02 5.575000000000000000e+01 5.975000000000000000e+01
5.700000000000000000e+01 7.098384615384616154e+02 3.930040893554687500e+02 -1.492492675781250000e+00 0.000000000000000000e+00 0.000000000000000000e+00 2.015369018554687500e+03 2.019789218902587891e+00 4.000000000000000000e+00 1.590277709960937500e+02 5.625000000000000000e+01 5.975000000000000000e+01
7.600000000000000000e+01 7.162000000000002728e+02 4.088089599609375000e+02 -1.633148193359375000e+00 0.000000000000000000e+00 0.000000000000000000e+00 2.000619140625000000e+03 2.010251045227050781e+00 4.000000000000000000e+00 1.696474914550781250e+02 5.675000000000000000e+01 5.975000000000000000e+01
6.900000000000000000e+01 7.022076923076926960e+02 4.127105102539062500e+02 -1.914520263671875000e+00 9.999999776482582092e-03 0.000000000000000000e+00 1.971119262695312500e+03 1.935783863067626953e+00 4.000000000000000000e+00 2.774479064941406250e+02 5.775000000000000000e+01 5.975000000000000000e+01
6.600000000000000000e+01 6.984307692307688740e+02 3.780584106445312500e+02 -2.028442382812500000e+00 9.999999776482582092e-03 0.000000000000000000e+00 1.960630371093750000e+03 1.868054628372192383e+00 4.000000000000000000e+00 4.418515014648437500e+02 5.825000000000000000e+01 5.975000000000000000e+01
6.400000000000000000e+01 6.841846153846153129e+02 3.284469604492187500e+02 -2.062072753906250000e+00 9.999999776482582092e-03 0.000000000000000000e+00 1.962924682617187500e+03 1.815993070602416992e+00 4.000000000000000000e+00 4.427692871093750000e+02 5.875000000000000000e+01 5.975000000000000000e+01
7.300000000000000000e+01 6.480999999999997954e+02 2.883202514648437500e+02 -2.095733642578125000e+00 1.419255882501602173e-01 0.000000000000000000e+00 1.965218994140625000e+03 1.627885341644287109e+00 4.000000000000000000e+00 4.999896240234375000e+02 5.925000000000000000e+01 5.975000000000000000e+01
3.900000000000000000e+01 5.803615384615387711e+02 2.715044555664062500e+02 -2.129394531250000000e+00 9.999999776482582092e-03 0.000000000000000000e+00 1.967513305664062500e+03 9.856192469596862793e-01 3.000000000000000000e+00 2.457702178955078125e+02 5.975000000000000000e+01 5.975000000000000000e+01
6.700000000000000000e+01 5.613692307692307395e+02 2.646937255859375000e+02 -2.012237548828125000e+00 0.000000000000000000e+00 0.000000000000000000e+00 1.996329956054687500e+03 1.823996782302856445e+00 4.000000000000000000e+00 1.180686950683593750e+02 6.075000000000000000e+01 5.975000000000000000e+01
6.900000000000000000e+01 5.531538461538461888e+02 2.633573913574218750e+02 -1.922912597656250000e+00 0.000000000000000000e+00 2.352941185235977173e-01 2.014776245117187500e+03 8.855423927307128906e-01 4.000000000000000000e+00 9.123500061035156250e+01 6.125000000000000000e+01 5.975000000000000000e+01
2.500000000000000000e+01 5.490153846153846189e+02 2.594621887207031250e+02 -1.833587646484375000e+00 0.000000000000000000e+00 2.352941185235977173e-01 2.033222656250000000e+03 1.638104438781738281e+00 3.000000000000000000e+00 8.870359802246093750e+01 6.175000000000000000e+01 5.975000000000000000e+01
6.700000000000000000e+01 5.512999999999999545e+02 2.539486694335937500e+02 -1.720947265625000000e+00 0.000000000000000000e+00 0.000000000000000000e+00 2.050125488281250000e+03 8.212206959724426270e-01 4.000000000000000000e+00 7.664369201660156250e+01 6.225000000000000000e+01 5.975000000000000000e+01
1.800000000000000000e+01 5.488384615384613880e+02 2.455068359375000000e+02 -1.600524902343750000e+00 0.000000000000000000e+00 6.470588445663452148e-01 2.066513671875000000e+03 8.207306861877441406e-01 1.000000000000000000e+00 7.111093902587890625e+01 6.275000000000000000e+01 5.975000000000000000e+01
3.100000000000000000e+01 5.464999999999995453e+02 2.370908966064453125e+02 -1.480102539062500000e+00 0.000000000000000000e+00 0.000000000000000000e+00 2.082902099609375000e+03 1.023309111595153809e+00 3.000000000000000000e+00 7.104553985595703125e+01 6.325000000000000000e+01 5.975000000000000000e+01
4.300000000000000000e+01 5.487615384615388621e+02 2.299245147705078125e+02 -1.359649658203125000e+00 0.000000000000000000e+00 0.000000000000000000e+00 2.099290283203125000e+03 8.763443827629089355e-01 3.000000000000000000e+00 8.936285400390625000e+01 6.375000000000000000e+01 5.975000000000000000e+01
4.800000000000000000e+01 5.474923076923074632e+02 2.281483917236328125e+02 -1.327392578125000000e+00 0.000000000000000000e+00 0.000000000000000000e+00 2.104450439453125000e+03 8.262404799461364746e-01 4.000000000000000000e+00 6.562109375000000000e+01 6.425000000000000000e+01 5.975000000000000000e+01
2.300000000000000000e+01 5.473999999999998636e+02 2.326368560791015625e+02 -1.295135498046875000e+00 0.000000000000000000e+00 0.000000000000000000e+00 2.109610351562500000e+03 8.269881010055541992e-01 3.000000000000000000e+00 7.182149505615234375e+01 6.475000000000000000e+01 5.975000000000000000e+01
5.800000000000000000e+01 5.465923076923077133e+02 2.396253509521484375e+02 -1.262847900390625000e+00 0.000000000000000000e+00 7.058823704719543457e-01 2.114770263671875000e+03 8.262729048728942871e-01 4.000000000000000000e+00 5.054989624023437500e+01 6.525000000000000000e+01 5.975000000000000000e+01
5.900000000000000000e+01 5.425538461538461661e+02 2.444021148681640625e+02 -1.258331298828125000e+00 0.000000000000000000e+00 6.470588445663452148e-01 2.117083251953125000e+03 8.251131772994995117e-01 4.000000000000000000e+00 5.687570190429687500e+01 6.575000000000000000e+01 5.975000000000000000e+01
1.200000000000000000e+01 5.491769230769235719e+02 2.559634246826171875e+02 -1.415679931640625000e+00 0.000000000000000000e+00 5.294117927551269531e-01 2.104626464843750000e+03 8.193725943565368652e-01 1.000000000000000000e+00 4.816773986816406250e+01 6.675000000000000000e+01 5.975000000000000000e+01
1.500000000000000000e+01 5.434846153846153811e+02 2.806734008789062500e+02 -1.623352050781250000e+00 9.999999776482582092e-03 3.529411852359771729e-01 2.085032714843750000e+03 1.054149031639099121e+00 1.000000000000000000e+00 4.008348464965820312e+01 6.775000000000000000e+01 5.975000000000000000e+01
1.000000000000000000e+01 1.402069230769231353e+03 5.377600708007812500e+02 1.168121337890625000e+00 9.999999776482582092e-03 0.000000000000000000e+00 1.356714355468750000e+03 1.350920319557189941e+00 1.000000000000000000e+00 1.347171997070312500e+03 7.250000000000000000e+00 6.025000000000000000e+01
2.900000000000000000e+01 7.106307692307698289e+02 4.025416870117187500e+02 2.193298339843750000e-01 0.000000000000000000e+00 0.000000000000000000e+00 1.414070800781250000e+03 1.729251027107238770e+00 3.000000000000000000e+00 9.375364379882812500e+02 8.750000000000000000e+00 6.025000000000000000e+01
2.700000000000000000e+01 8.388461538461540385e+02 3.986051330566406250e+02 5.007934570312500000e-02 0.000000000000000000e+00 0.000000000000000000e+00 1.487274291992187500e+03 1.787743806838989258e+00 3.000000000000000000e+00 6.107962036132812500e+02 9.250000000000000000e+00 6.025000000000000000e+01
5.500000000000000000e+01 9.062846153846151083e+02 4.543337402343750000e+02 1.879882812500000000e-02 0.000000000000000000e+00 0.000000000000000000e+00 1.586642578125000000e+03 1.939349770545959473e+00 4.000000000000000000e+00 2.884866333007812500e+02 1.025000000000000000e+01 6.025000000000000000e+01
6.500000000000000000e+01 9.264230769230770193e+02 4.732276306152343750e+02 2.508544921875000000e-02 0.000000000000000000e+00 0.000000000000000000e+00 1.632966796875000000e+03 1.974570751190185547e+00 4.000000000000000000e+00 4.989935913085937500e+02 1.075000000000000000e+01 6.025000000000000000e+01
5.600000000000000000e+01 7.573538461538462343e+02 4.702361450195312500e+02 3.137207031250000000e-02 0.000000000000000000e+00 0.000000000000000000e+00 1.679291015625000000e+03 1.982906818389892578e+00 4.000000000000000000e+00 2.433011474609375000e+02 1.125000000000000000e+01 6.025000000000000000e+01
5.300000000000000000e+01 7.947461538461541295e+02 4.382902221679687500e+02 5.245971679687500000e-01 0.000000000000000000e+00 2.352941185235977173e-01 1.797987304687500000e+03 1.961433649063110352e+00 4.000000000000000000e+00 3.336150512695312500e+02 1.225000000000000000e+01 6.025000000000000000e+01
2.700000000000000000e+01 8.799153846153848235e+02 4.182020263671875000e+02 7.712097167968750000e-01 0.000000000000000000e+00 0.000000000000000000e+00 1.857335327148437500e+03 1.963683605194091797e+00 3.000000000000000000e+00 2.390892639160156250e+02 1.275000000000000000e+01 6.025000000000000000e+01
2.900000000000000000e+01 8.318461538461541522e+02 3.882193908691406250e+02 1.078826904296875000e+00 0.000000000000000000e+00 0.000000000000000000e+00 1.922931152343750000e+03 1.964176177978515625e+00 3.000000000000000000e+00 2.995375671386718750e+02 1.325000000000000000e+01 6.025000000000000000e+01
5.400000000000000000e+01 8.082076923076919002e+02 3.639262390136718750e+02 1.569519042968750000e+00 0.000000000000000000e+00 0.000000000000000000e+00 2.007269653320312500e+03 1.947927355766296387e+00 4.000000000000000000e+00 3.259492797851562500e+02 1.375000000000000000e+01 6.025000000000000000e+01
5.000000000000000000e+01 7.636076923076925596e+02 3.040294189453125000e+02 2.550872802734375000e+00 0.000000000000000000e+00 0.000000000000000000e+00 2.175946777343750000e+03 1.919586181640625000e+00 4.000000000000000000e+00 2.823778686523437500e+02 1.475000000000000000e+01 6.025000000000000000e+01
6.500000000000000000e+01 7.448692307692309669e+02 2.570710754394531250e+02 3.054351806640625000e+00 0.000000000000000000e+00 0.000000000000000000e+00 2.264038818359375000e+03 1.923063755035400391e+00 4.000000000000000000e+00 2.082797088623046875e+02 1.525000000000000000e+01 6.025000000000000000e+01
5.300000000000000000e+01 6.679000000000000909e+02 2.250962982177734375e+02 3.570648193359375000e+00 0.000000000000000000e+00 0.000000000000000000e+00 2.355883789062500000e+03 1.938882350921630859e+00 4.000000000000000000e+00 2.002982788085937500e+02 1.575000000000000000e+01 6.025000000000000000e+01
6.100000000000000000e+01 6.535384615384615472e+02 2.240446166992187500e+02 4.086944580078125000e+00 0.000000000000000000e+00 0.000000000000000000e+00 2.447729003906250000e+03 1.965567350387573242e+00 4.000000000000000000e+00 1.310248870849609375e+02 1.625000000000000000e+01 6.025000000000000000e+01
6.100000000000000000e+01 6.408461538461540385e+02 2.430483551025390625e+02 4.603210449218750000e+00 0.000000000000000000e+00 0.000000000000000000e+00 2.539574218750000000e+03 2.005478620529174805e+00 4.000000000000000000e+00 3.912432861328125000e+01 1.675000000000000000e+01 6.025000000000000000e+01
5.900000000000000000e+01 5.937692307692306031e+02 2.502728271484375000e+02 5.084625244140625000e+00 0.000000000000000000e+00 0.000000000000000000e+00 2.595008300781250000e+03 2.070986986160278320e+00 4.000000000000000000e+00 5.035277175903320312e+01 1.725000000000000000e+01 6.025000000000000000e+01
4.300000000000000000e+01 5.582153846153847780e+02 2.332827606201171875e+02 5.554443359375000000e+00 0.000000000000000000e+00 0.000000000000000000e+00 2.638305175781250000e+03 2.118707418441772461e+00 3.000000000000000000e+00 2.888443183898925781e+01 1.775000000000000000e+01 6.025000000000000000e+01
2.300000000000000000e+01 6.498230769230769965e+02 3.151543579101562500e+02 4.196014404296875000e+00 0.000000000000000000e+00 0.000000000000000000e+00 2.645354248046875000e+03 2.076069593429565430e+00 3.000000000000000000e+00 6.495639801025390625e+01 2.425000000000000000e+01 6.025000000000000000e+01
5.800000000000000000e+01 7.074000000000002046e+02 3.633676757812500000e+02 2.130554199218750000e+00 0.000000000000000000e+00 2.941176593303680420e-01 2.499915771484375000e+03 2.130846738815307617e+00 4.000000000000000000e+00 8.376016998291015625e+01 3.025000000000000000e+01 6.025000000000000000e+01
4.800000000000000000e+01 6.599000000000000909e+02 4.063897094726562500e+02 1.577850341796875000e+00 0.000000000000000000e+00 5.882352963089942932e-02 2.395874267578125000e+03 3.232304573059082031e+00 4.000000000000000000e+00 1.435621833801269531e+01 3.325000000000000000e+01 6.025000000000000000e+01
7.300000000000000000e+01 6.829461538461538339e+02 4.015006103515625000e+02 1.410766601562500000e+00 0.000000000000000000e+00 0.000000000000000000e+00 2.365340332031250000e+03 2.919505119323730469e+00 4.000000000000000000e+00 9.888999176025390625e+01 3.375000000000000000e+01 6.025000000000000000e+01
5.500000000000000000e+01 7.216769230769235719e+02 3.845571594238281250e+02 1.357116699218750000e+00 0.000000000000000000e+00 0.000000000000000000e+00 2.349723388671875000e+03 2.036534070968627930e+00 4.000000000000000000e+00 1.126856460571289062e+02 3.425000000000000000e+01 6.025000000000000000e+01
6.200000000000000000e+01 7.619307692307695561e+02 2.922301940917968750e+02 1.188568115234375000e+00 0.000000000000000000e+00 0.000000000000000000e+00 2.304483398437500000e+03 2.012205123901367188e+00 4.000000000000000000e+00 2.461816101074218750e+02 3.575000000000000000e+01 6.025000000000000000e+01
2.200000000000000000e+01 7.573769230769228216e+02 2.830511779785156250e+02 1.104736328125000000e+00 0.000000000000000000e+00 0.000000000000000000e+00 2.295309326171875000e+03 2.206308364868164062e+00 3.000000000000000000e+00 1.683824768066406250e+02 3.625000000000000000e+01 6.025000000000000000e+01
5.600000000000000000e+01 6.058307692307689649e+02 3.239514770507812500e+02 7.613830566406250000e-01 0.000000000000000000e+00 0.000000000000000000e+00 2.260862304687500000e+03 3.212961912155151367e+00 4.000000000000000000e+00 1.391262054443359375e+02 3.875000000000000000e+01 6.025000000000000000e+01
6.400000000000000000e+01 5.945461538461537430e+02 3.402627868652343750e+02 7.078857421875000000e-01 0.000000000000000000e+00 0.000000000000000000e+00 2.256257568359375000e+03 3.203011512756347656e+00 4.000000000000000000e+00 1.433315429687500000e+02 3.925000000000000000e+01 6.025000000000000000e+01
6.200000000000000000e+01 6.306153846153845279e+02 3.613067016601562500e+02 5.972595214843750000e-01 0.000000000000000000e+00 0.000000000000000000e+00 2.248751708984375000e+03 3.147028923034667969e+00 4.000000000000000000e+00 1.512154235839843750e+02 4.025000000000000000e+01 6.025000000000000000e+01
6.300000000000000000e+01 6.224230769230770193e+02 3.598317565917968750e+02 5.416870117187500000e-01 0.000000000000000000e+00 0.000000000000000000e+00 2.245120605468750000e+03 2.970423460006713867e+00 4.000000000000000000e+00 1.781156463623046875e+02 4.075000000000000000e+01 6.025000000000000000e+01
6.300000000000000000e+01 6.245692307692307850e+02 3.534327087402343750e+02 4.861145019531250000e-01 0.000000000000000000e+00 2.352941185235977173e-01 2.241489501953125000e+03 2.179675579071044922e+00 4.000000000000000000e+00 1.752763214111328125e+02 4.125000000000000000e+01 6.025000000000000000e+01
5.800000000000000000e+01 6.061307692307691468e+02 3.441029663085937500e+02 4.090881347656250000e-01 0.000000000000000000e+00 0.000000000000000000e+00 2.233416992187500000e+03 2.375622987747192383e+00 4.000000000000000000e+00 1.747862701416015625e+02 4.175000000000000000e+01 6.025000000000000000e+01
9.000000000000000000e+00 6.219923076923076906e+02 3.407424621582031250e+02 3.320617675781250000e-01 0.000000000000000000e+00 0.000000000000000000e+00 2.225344482421875000e+03 2.022248983383178711e+00 1.000000000000000000e+00 1.684734497070312500e+02 4.225000000000000000e+01 6.025000000000000000e+01
5.600000000000000000e+01 5.955538461538463935e+02 3.403450012207031250e+02 2.550354003906250000e-01 0.000000000000000000e+00 0.000000000000000000e+00 2.217271972656250000e+03 2.563904523849487305e+00 4.000000000000000000e+00 1.685411376953125000e+02 4.275000000000000000e+01 6.025000000000000000e+01
6.300000000000000000e+01 6.088461538461534701e+02 3.413215026855468750e+02 1.761779785156250000e-01 0.000000000000000000e+00 0.000000000000000000e+00 2.208974365234375000e+03 2.482853889465332031e+00 4.000000000000000000e+00 1.731593933105468750e+02 4.325000000000000000e+01 6.025000000000000000e+01
6.000000000000000000e+01 6.148923076923075541e+02 3.455883789062500000e+02 7.537841796875000000e-03 0.000000000000000000e+00 0.000000000000000000e+00 2.191029785156250000e+03 2.030740976333618164e+00 4.000000000000000000e+00 1.611202697753906250e+02 4.425000000000000000e+01 6.025000000000000000e+01
6.900000000000000000e+01 6.182846153846151083e+02 3.489717712402343750e+02 -7.678222656250000000e-02 0.000000000000000000e+00 0.000000000000000000e+00 2.182057373046875000e+03 2.030624866485595703e+00 4.000000000000000000e+00 1.691478118896484375e+02 4.475000000000000000e+01 6.025000000000000000e+01
6.500000000000000000e+01 6.235615384615382482e+02 3.516403808593750000e+02 -1.438903808593750000e-01 0.000000000000000000e+00 0.000000000000000000e+00 2.174084960937500000e+03 1.219892740249633789e+00 4.000000000000000000e+00 1.866523742675781250e+02 4.525000000000000000e+01 6.025000000000000000e+01
7.500000000000000000e+01 6.313307692307691923e+02 3.533511657714843750e+02 -1.938171386718750000e-01 0.000000000000000000e+00 0.000000000000000000e+00 2.167112304687500000e+03 8.284975886344909668e-01 4.000000000000000000e+00 1.915241851806640625e+02 4.575000000000000000e+01 6.025000000000000000e+01
6.200000000000000000e+01 6.276692307692305803e+02 3.556088256835937500e+02 -2.437133789062500000e-01 0.000000000000000000e+00 0.000000000000000000e+00 2.160139892578125000e+03 8.294914960861206055e-01 4.000000000000000000e+00 1.742188873291015625e+02 4.625000000000000000e+01 6.025000000000000000e+01
4.300000000000000000e+01 6.206230769230768374e+02 3.582886657714843750e+02 -2.936096191406250000e-01 0.000000000000000000e+00 0.000000000000000000e+00 2.153167480468750000e+03 8.302776813507080078e-01 3.000000000000000000e+00 1.550956878662109375e+02 4.675000000000000000e+01 6.025000000000000000e+01
6.000000000000000000e+01 6.250538461538460524e+02 3.622997131347656250e+02 -3.137207031250000000e-01 0.000000000000000000e+00 0.000000000000000000e+00 2.150198974609375000e+03 8.302158117294311523e-01 4.000000000000000000e+00 1.768020782470703125e+02 4.725000000000000000e+01 6.025000000000000000e+01
7.000000000000000000e+01 6.217307692307693969e+02 3.669923706054687500e+02 -3.238830566406250000e-01 0.000000000000000000e+00 0.000000000000000000e+00 2.148564941406250000e+03 1.676658391952514648e+00 4.000000000000000000e+00 1.488988647460937500e+02 4.775000000000000000e+01 6.025000000000000000e+01
6.400000000000000000e+01 6.115846153846154039e+02 3.688109436035156250e+02 -3.340454101562500000e-01 0.000000000000000000e+00 0.000000000000000000e+00 2.146931152343750000e+03 2.043976545333862305e+00 4.000000000000000000e+00 1.443857727050781250e+02 4.825000000000000000e+01 6.025000000000000000e+01
7.300000000000000000e+01 6.298923076923073268e+02 3.665610656738281250e+02 -3.442077636718750000e-01 0.000000000000000000e+00 0.000000000000000000e+00 2.145297119140625000e+03 2.046769857406616211e+00 4.000000000000000000e+00 1.464975738525390625e+02 4.875000000000000000e+01 6.025000000000000000e+01
3.400000000000000000e+01 6.283230769230772239e+02 3.607633361816406250e+02 -3.495483398437500000e-01 0.000000000000000000e+00 0.000000000000000000e+00 2.143204589843750000e+03 1.902582526206970215e+00 3.000000000000000000e+00 1.552203979492187500e+02 4.925000000000000000e+01 6.025000000000000000e+01
6.300000000000000000e+01 6.311307692307691468e+02 3.581874694824218750e+02 -3.548889160156250000e-01 0.000000000000000000e+00 0.000000000000000000e+00 2.141112304687500000e+03 1.822334170341491699e+00 4.000000000000000000e+00 1.524405670166015625e+02 4.975000000000000000e+01 6.025000000000000000e+01
6.900000000000000000e+01 6.277846153846153356e+02 3.573804626464843750e+02 -3.602294921875000000e-01 0.000000000000000000e+00 0.000000000000000000e+00 2.139019775390625000e+03 1.659494996070861816e+00 4.000000000000000000e+00 2.151551208496093750e+02 5.025000000000000000e+01 6.025000000000000000e+01
3.400000000000000000e+01 6.309384615384612971e+02 3.584833374023437500e+02 -3.770141601562500000e-01 0.000000000000000000e+00 0.000000000000000000e+00 2.134930908203125000e+03 8.410459160804748535e-01 3.000000000000000000e+00 1.837572326660156250e+02 5.075000000000000000e+01 6.025000000000000000e+01
3.400000000000000000e+01 6.380076923076921958e+02 3.609038391113281250e+02 -4.281311035156250000e-01 0.000000000000000000e+00 2.941176593303680420e-01 2.124853027343750000e+03 8.384273052215576172e-01 3.000000000000000000e+00 1.431127624511718750e+02 5.125000000000000000e+01 6.025000000000000000e+01
6.400000000000000000e+01 6.335461538461538566e+02 3.637942810058593750e+02 -4.792480468750000000e-01 0.000000000000000000e+00 0.000000000000000000e+00 2.114775146484375000e+03 9.603876471519470215e-01 4.000000000000000000e+00 1.507888641357421875e+02 5.175000000000000000e+01 6.025000000000000000e+01
5.800000000000000000e+01 6.280076923076921958e+02 3.656258850097656250e+02 -5.303649902343750000e-01 0.000000000000000000e+00 0.000000000000000000e+00 2.104697265625000000e+03 1.855896472930908203e+00 4.000000000000000000e+00 2.012696533203125000e+02 5.225000000000000000e+01 6.025000000000000000e+01
1.900000000000000000e+01 6.311846153846153129e+02 3.647140808105468750e+02 -6.216125488281250000e-01 0.000000000000000000e+00 2.941176593303680420e-01 2.090689941406250000e+03 2.040481567382812500e+00 1.000000000000000000e+00 1.922864685058593750e+02 5.275000000000000000e+01 6.025000000000000000e+01
6.500000000000000000e+01 6.425384615384610925e+02 3.637843627929687500e+02 -8.843383789062500000e-01 0.000000000000000000e+00 5.294117927551269531e-01 2.054816406250000000e+03 2.021260976791381836e+00 4.000000000000000000e+00 1.839900817871093750e+02 5.375000000000000000e+01 6.025000000000000000e+01
6.400000000000000000e+01 6.575923076923077133e+02 3.650307312011718750e+02 -1.015686035156250000e+00 0.000000000000000000e+00 0.000000000000000000e+00 2.036879516601562500e+03 2.017357826232910156e+00 4.000000000000000000e+00 1.669472351074218750e+02 5.425000000000000000e+01 6.025000000000000000e+01
7.000000000000000000e+00 6.856923076923077360e+02 3.859484252929687500e+02 -1.403472900390625000e+00 0.000000000000000000e+00 0.000000000000000000e+00 1.996348022460937500e+03 2.013253688812255859e+00 1.000000000000000000e+00 1.321126403808593750e+02 5.525000000000000000e+01 6.025000000000000000e+01
6.600000000000000000e+01 7.011615384615381572e+02 4.085099487304687500e+02 -1.606323242187500000e+00 0.000000000000000000e+00 0.000000000000000000e+00 1.975749511718750000e+03 2.004515886306762695e+00 4.000000000000000000e+00 1.424743194580078125e+02 5.575000000000000000e+01 6.025000000000000000e+01
7.000000000000000000e+01 7.190615384615385892e+02 4.260184020996093750e+02 -1.809143066406250000e+00 0.000000000000000000e+00 0.000000000000000000e+00 1.955151123046875000e+03 1.996623754501342773e+00 4.000000000000000000e+00 1.538970947265625000e+02 5.625000000000000000e+01 6.025000000000000000e+01
6.000000000000000000e+01 7.152769230769233673e+02 4.355948486328125000e+02 -1.951629638671875000e+00 0.000000000000000000e+00 0.000000000000000000e+00 1.939643188476562500e+03 1.988613843917846680e+00 4.000000000000000000e+00 1.464217834472656250e+02 5.675000000000000000e+01 6.025000000000000000e+01
5.900000000000000000e+01 7.112076923076923549e+02 4.378998107910156250e+02 -2.094146728515625000e+00 0.000000000000000000e+00 2.941176593303680420e-01 1.924135375976562500e+03 1.954901814460754395e+00 4.000000000000000000e+00 1.785679016113281250e+02 5.725000000000000000e+01 6.025000000000000000e+01
4.600000000000000000e+01 7.059923076923076906e+02 4.289687805175781250e+02 -2.236633300781250000e+00 9.999999776482582092e-03 0.000000000000000000e+00 1.908627563476562500e+03 1.893530607223510742e+00 4.000000000000000000e+00 3.469579467773437500e+02 5.775000000000000000e+01 6.025000000000000000e+01
6.900000000000000000e+01 7.004307692307692150e+02 4.001445007324218750e+02 -2.353637695312500000e+00 2.375109046697616577e-01 0.000000000000000000e+00 1.897100952148437500e+03 1.806848406791687012e+00 4.000000000000000000e+00 5.310274047851562500e+02 5.825000000000000000e+01 6.025000000000000000e+01
3.000000000000000000e+00 6.824153846153840277e+02 3.526660766601562500e+02 -2.394195556640625000e+00 1.706509739160537720e-01 2.941176593303680420e-01 1.897518188476562500e+03 1.618414640426635742e+00 1.000000000000000000e+00 6.524711914062500000e+02 5.875000000000000000e+01 6.025000000000000000e+01
7.100000000000000000e+01 6.587692307692304894e+02 3.074119873046875000e+02 -2.434783935546875000e+00 1.716368496417999268e-01 0.000000000000000000e+00 1.897935302734375000e+03 1.690744519233703613e+00 4.000000000000000000e+00 4.501560974121093750e+02 5.925000000000000000e+01 6.025000000000000000e+01
6.700000000000000000e+01 5.941769230769231172e+02 2.844708557128906250e+02 -2.475341796875000000e+00 1.160275265574455261e-01 8.235294222831726074e-01 1.898352416992187500e+03 1.248292207717895508e+00 4.000000000000000000e+00 3.566728210449218750e+02 5.975000000000000000e+01 6.025000000000000000e+01
6.600000000000000000e+01 5.621615384615384983e+02 2.747994384765625000e+02 -2.449859619140625000e+00 9.999999776482582092e-03 5.882353186607360840e-01 1.908066284179687500e+03 1.913859844207763672e+00 4.000000000000000000e+00 2.119457397460937500e+02 6.025000000000000000e+01 6.025000000000000000e+01
3.800000000000000000e+01 5.514230769230769056e+02 2.702758178710937500e+02 -2.358337402343750000e+00 9.999999776482582092e-03 2.352941185235977173e-01 1.927077026367187500e+03 1.949332356452941895e+00 3.000000000000000000e+00 8.884426116943359375e+01 6.075000000000000000e+01 6.025000000000000000e+01
1.600000000000000000e+01 5.461923076923073950e+02 2.664739074707031250e+02 -2.266815185546875000e+00 0.000000000000000000e+00 2.941176593303680420e-01 1.946087646484375000e+03 1.972928524017333984e+00 1.000000000000000000e+00 6.828809356689453125e+01 6.125000000000000000e+01 6.025000000000000000e+01
5.200000000000000000e+01 5.499692307692305349e+02 2.512453613281250000e+02 -2.059295654296875000e+00 0.000000000000000000e+00 2.352941185235977173e-01 1.982032836914062500e+03 1.844745039939880371e+00 4.000000000000000000e+00 1.063550872802734375e+02 6.225000000000000000e+01 6.025000000000000000e+01
6.000000000000000000e+01 5.516076923076918774e+02 2.393317108154296875e+02 -1.935150146484375000e+00 0.000000000000000000e+00 8.235294222831726074e-01 1.998275390625000000e+03 1.097790956497192383e+00 4.000000000000000000e+00 7.208993530273437500e+01 6.275000000000000000e+01 6.025000000000000000e+01
1.800000000000000000e+01 5.528769230769231626e+02 2.252148284912109375e+02 -1.811004638671875000e+00 9.999999776482582092e-03 0.000000000000000000e+00 2.014517822265625000e+03 1.525527834892272949e+00 1.000000000000000000e+00 8.347520446777343750e+01 6.325000000000000000e+01 6.025000000000000000e+01
4.800000000000000000e+01 5.508307692307691923e+02 2.125655517578125000e+02 -1.686859130859375000e+00 9.999999776482582092e-03 0.000000000000000000e+00 2.030760253906250000e+03 1.980571508407592773e+00 4.000000000000000000e+00 6.624585723876953125e+01 6.375000000000000000e+01 6.025000000000000000e+01
1.700000000000000000e+01 5.511307692307692605e+02 2.064718475341796875e+02 -1.644317626953125000e+00 0.000000000000000000e+00 0.000000000000000000e+00 2.036789550781250000e+03 1.870438337326049805e+00 1.000000000000000000e+00 5.607586288452148438e+01 6.425000000000000000e+01 6.025000000000000000e+01
1.200000000000000000e+01 5.575538461538461661e+02 2.422329864501953125e+02 -1.543914794921875000e+00 9.999999776482582092e-03 5.294117927551269531e-01 2.052074951171875000e+03 1.287953734397888184e+00 1.000000000000000000e+00 4.844418334960937500e+01 6.575000000000000000e+01 6.025000000000000000e+01
6.000000000000000000e+00 5.590692307692306713e+02 2.524383697509765625e+02 -1.610015869140625000e+00 9.999999776482582092e-03 2.352941185235977173e-01 2.046894653320312500e+03 1.815773606300354004e+00 1.000000000000000000e+00 6.086928558349609375e+01 6.625000000000000000e+01 6.025000000000000000e+01
9.000000000000000000e+00 5.615384615384616609e+02 2.653952331542968750e+02 -1.676116943359375000e+00 9.999999776482582092e-03 2.352941185235977173e-01 2.041714233398437500e+03 1.802396655082702637e+00 1.000000000000000000e+00 7.889889526367187500e+01 6.675000000000000000e+01 6.025000000000000000e+01
4.700000000000000000e+01 5.541076923076924459e+02 2.926859130859375000e+02 -1.862121582031250000e+00 9.999999776482582092e-03 1.764705926179885864e-01 2.023882446289062500e+03 9.427039623260498047e-01 4.000000000000000000e+00 6.706855773925781250e+01 6.775000000000000000e+01 6.025000000000000000e+01
2.000000000000000000e+00 7.667923076923077588e+02 4.706711120605468750e+02 1.565551757812500000e-01 9.999999776482582092e-03 0.000000000000000000e+00 1.276550170898437500e+03 1.508590340614318848e+00 1.000000000000000000e+00 1.313272949218750000e+03 8.250000000000000000e+00 6.075000000000000000e+01
4.500000000000000000e+01 6.816230769230769511e+02 4.194825134277343750e+02 -1.364135742187500000e-01 0.000000000000000000e+00 0.000000000000000000e+00 1.318360839843750000e+03 1.691342592239379883e+00 4.000000000000000000e+00 8.360084838867187500e+02 8.750000000000000000e+00 6.075000000000000000e+01
1.400000000000000000e+01 7.143230769230769965e+02 3.511197509765625000e+02 -4.293518066406250000e-01 0.000000000000000000e+00 0.000000000000000000e+00 1.360171630859375000e+03 1.734620213508605957e+00 1.000000000000000000e+00 1.065345581054687500e+03 9.250000000000000000e+00 6.075000000000000000e+01
4.100000000000000000e+01 8.296000000000001364e+02 4.051655883789062500e+02 -5.671386718750000000e-01 0.000000000000000000e+00 0.000000000000000000e+00 1.406757690429687500e+03 1.790386199951171875e+00 3.000000000000000000e+00 5.458719482421875000e+02 9.750000000000000000e+00 6.075000000000000000e+01
3.500000000000000000e+01 8.207769230769225715e+02 4.499237060546875000e+02 -6.532287597656250000e-01 0.000000000000000000e+00 0.000000000000000000e+00 1.454935546875000000e+03 1.867749571800231934e+00 3.000000000000000000e+00 2.672482299804687500e+02 1.025000000000000000e+01 6.075000000000000000e+01
6.000000000000000000e+01 7.398769230769231626e+02 4.573455200195312500e+02 -5.877990722656250000e-01 0.000000000000000000e+00 0.000000000000000000e+00 1.603363403320312500e+03 1.925989985466003418e+00 4.000000000000000000e+00 2.152486724853515625e+02 1.175000000000000000e+01 6.075000000000000000e+01
2.600000000000000000e+01 7.652461538461536747e+02 4.428571166992187500e+02 -3.502197265625000000e-01 0.000000000000000000e+00 2.941176593303680420e-01 1.655435668945312500e+03 1.903368353843688965e+00 3.000000000000000000e+00 2.893472290039062500e+02 1.225000000000000000e+01 6.075000000000000000e+01
6.400000000000000000e+01 7.986307692307692605e+02 4.374031066894531250e+02 -1.126403808593750000e-01 0.000000000000000000e+00 0.000000000000000000e+00 1.707507812500000000e+03 1.906236529350280762e+00 4.000000000000000000e+00 3.198893127441406250e+02 1.275000000000000000e+01 6.075000000000000000e+01
3.600000000000000000e+01 7.534076923076924004e+02 4.273280944824218750e+02 1.914062500000000000e-01 0.000000000000000000e+00 0.000000000000000000e+00 1.768034301757812500e+03 1.919819116592407227e+00 3.000000000000000000e+00 4.648047790527343750e+02 1.325000000000000000e+01 6.075000000000000000e+01
4.800000000000000000e+01 7.264153846153844825e+02 4.162239074707031250e+02 6.949157714843750000e-01 0.000000000000000000e+00 0.000000000000000000e+00 1.853923583984375000e+03 1.916495203971862793e+00 4.000000000000000000e+00 3.820484619140625000e+02 1.375000000000000000e+01 6.075000000000000000e+01
6.500000000000000000e+01 6.851384615384619110e+02 3.294452819824218750e+02 1.701965332031250000e+00 0.000000000000000000e+00 0.000000000000000000e+00 2.025701904296875000e+03 1.899760246276855469e+00 4.000000000000000000e+00 2.401493682861328125e+02 1.475000000000000000e+01 6.075000000000000000e+01
5.400000000000000000e+01 6.733230769230768828e+02 2.629872741699218750e+02 2.221740722656250000e+00 0.000000000000000000e+00 0.000000000000000000e+00 2.114585205078125000e+03 1.894993305206298828e+00 4.000000000000000000e+00 2.471613006591796875e+02 1.525000000000000000e+01 6.075000000000000000e+01
6.100000000000000000e+01 6.814307692307694424e+02 2.315133972167968750e+02 2.757720947265625000e+00 0.000000000000000000e+00 0.000000000000000000e+00 2.206462402343750000e+03 1.894493341445922852e+00 4.000000000000000000e+00 1.839610137939453125e+02 1.575000000000000000e+01 6.075000000000000000e+01
4.100000000000000000e+01 6.633230769230765418e+02 2.410815277099609375e+02 3.293731689453125000e+00 0.000000000000000000e+00 0.000000000000000000e+00 2.298339355468750000e+03 1.926267027854919434e+00 3.000000000000000000e+00 2.604458618164062500e+02 1.625000000000000000e+01 6.075000000000000000e+01
5.600000000000000000e+01 6.433692307692310806e+02 2.720724792480468750e+02 3.829742431640625000e+00 0.000000000000000000e+00 0.000000000000000000e+00 2.390216552734375000e+03 1.983840584754943848e+00 4.000000000000000000e+00 9.103514099121093750e+01 1.675000000000000000e+01 6.075000000000000000e+01
5.300000000000000000e+01 6.305769230769232081e+02 3.301413269042968750e+02 5.221221923828125000e+00 0.000000000000000000e+00 0.000000000000000000e+00 2.599309814453125000e+03 2.098397970199584961e+00 4.000000000000000000e+00 7.198351287841796875e+01 2.225000000000000000e+01 6.075000000000000000e+01
6.100000000000000000e+01 6.085000000000001137e+02 3.395223388671875000e+02 4.896148681640625000e+00 0.000000000000000000e+00 0.000000000000000000e+00 2.590909667968750000e+03 2.357576847076416016e+00 4.000000000000000000e+00 8.107170867919921875e+01 2.275000000000000000e+01 6.075000000000000000e+01
5.000000000000000000e+01 5.879923076923079179e+02 3.466509094238281250e+02 4.519561767578125000e+00 0.000000000000000000e+00 0.000000000000000000e+00 2.586003906250000000e+03 2.783774375915527344e+00 4.000000000000000000e+00 9.083979034423828125e+01 2.325000000000000000e+01 6.075000000000000000e+01
5.500000000000000000e+01 5.866461538461539931e+02 3.512007446289062500e+02 4.142974853515625000e+00 0.000000000000000000e+00 0.000000000000000000e+00 2.581098144531250000e+03 2.613608121871948242e+00 4.000000000000000000e+00 1.355343475341796875e+02 2.375000000000000000e+01 6.075000000000000000e+01
5.400000000000000000e+01 5.846153846153847553e+02 3.489800109863281250e+02 3.766387939453125000e+00 0.000000000000000000e+00 0.000000000000000000e+00 2.576192382812500000e+03 2.074243783950805664e+00 4.000000000000000000e+00 1.195422821044921875e+02 2.425000000000000000e+01 6.075000000000000000e+01
9.000000000000000000e+00 6.142307692307691696e+02 3.474930725097656250e+02 3.135192871093750000e+00 0.000000000000000000e+00 0.000000000000000000e+00 2.534308349609375000e+03 2.084190607070922852e+00 1.000000000000000000e+00 9.730092620849609375e+01 2.525000000000000000e+01 6.075000000000000000e+01
4.100000000000000000e+01 6.583307692307693060e+02 3.539420166015625000e+02 2.521453857421875000e+00 0.000000000000000000e+00 0.000000000000000000e+00 2.487842773437500000e+03 2.091550111770629883e+00 3.000000000000000000e+00 5.189315795898437500e+01 2.625000000000000000e+01 6.075000000000000000e+01
4.800000000000000000e+01 5.986692307692308077e+02 3.657073669433593750e+02 1.955108642578125000e+00 0.000000000000000000e+00 0.000000000000000000e+00 2.444745117187500000e+03 2.104456424713134766e+00 4.000000000000000000e+00 5.175040435791015625e+01 2.775000000000000000e+01 6.075000000000000000e+01
5.300000000000000000e+01 6.025384615384612061e+02 3.830852966308593750e+02 1.615386962890625000e+00 0.000000000000000000e+00 2.941176593303680420e-01 2.410203857421875000e+03 2.938478708267211914e+00 4.000000000000000000e+00 3.167798042297363281e+01 2.925000000000000000e+01 6.075000000000000000e+01
5.400000000000000000e+01 6.218769230769230489e+02 3.775279235839843750e+02 1.527343750000000000e+00 0.000000000000000000e+00 0.000000000000000000e+00 2.399640869140625000e+03 2.273829936981201172e+00 4.000000000000000000e+00 1.681449508666992188e+01 2.975000000000000000e+01 6.075000000000000000e+01
5.100000000000000000e+01 6.672461538461544706e+02 3.782858581542968750e+02 1.015991210937500000e+00 0.000000000000000000e+00 0.000000000000000000e+00 2.289227783203125000e+03 3.166737794876098633e+00 4.000000000000000000e+00 3.568787384033203125e+01 3.375000000000000000e+01 6.075000000000000000e+01
5.300000000000000000e+01 6.981076923076925596e+02 3.604540405273437500e+02 1.039886474609375000e+00 0.000000000000000000e+00 1.176470592617988586e-01 2.281913818359375000e+03 3.117837905883789062e+00 4.000000000000000000e+00 1.128422241210937500e+02 3.425000000000000000e+01 6.075000000000000000e+01
8.000000000000000000e+00 7.210615384615383618e+02 3.322959899902343750e+02 1.063751220703125000e+00 0.000000000000000000e+00 0.000000000000000000e+00 2.274599609375000000e+03 2.523430585861206055e+00 1.000000000000000000e+00 1.086859893798828125e+02 3.475000000000000000e+01 6.075000000000000000e+01
6.900000000000000000e+01 7.167615384615380663e+02 3.017884521484375000e+02 1.087646484375000000e+00 0.000000000000000000e+00 0.000000000000000000e+00 2.267285644531250000e+03 2.230212926864624023e+00 4.000000000000000000e+00 2.035628967285156250e+02 3.525000000000000000e+01 6.075000000000000000e+01
6.700000000000000000e+01 6.931153846153848690e+02 2.767195434570312500e+02 1.083587646484375000e+00 0.000000000000000000e+00 0.000000000000000000e+00 2.259520751953125000e+03 2.959959030151367188e+00 4.000000000000000000e+00 9.312759399414062500e+01 3.575000000000000000e+01 6.075000000000000000e+01
6.400000000000000000e+01 7.584384615384612971e+02 2.637153015136718750e+02 9.956054687500000000e-01 0.000000000000000000e+00 0.000000000000000000e+00 2.250403076171875000e+03 2.630938529968261719e+00 4.000000000000000000e+00 2.048808746337890625e+02 3.625000000000000000e+01 6.075000000000000000e+01
6.000000000000000000e+00 6.943230769230769965e+02 2.667796020507812500e+02 9.076538085937500000e-01 0.000000000000000000e+00 5.882352963089942932e-02 2.241285644531250000e+03 2.257333755493164062e+00 1.000000000000000000e+00 1.417067260742187500e+02 3.675000000000000000e+01 6.075000000000000000e+01
5.400000000000000000e+01 6.717076923076922412e+02 2.837961120605468750e+02 8.197021484375000000e-01 0.000000000000000000e+00 0.000000000000000000e+00 2.232167968750000000e+03 2.041381835937500000e+00 4.000000000000000000e+00 1.673003234863281250e+02 3.725000000000000000e+01 6.075000000000000000e+01
6.100000000000000000e+01 6.458230769230769965e+02 3.031351623535156250e+02 7.544555664062500000e-01 0.000000000000000000e+00 0.000000000000000000e+00 2.226243896484375000e+03 2.047953128814697266e+00 4.000000000000000000e+00 1.823050537109375000e+02 3.775000000000000000e+01 6.075000000000000000e+01
6.400000000000000000e+01 6.333923076923080089e+02 3.210404968261718750e+02 7.119140625000000000e-01 0.000000000000000000e+00 0.000000000000000000e+00 2.223512939453125000e+03 2.047200441360473633e+00 4.000000000000000000e+00 1.575844573974609375e+02 3.825000000000000000e+01 6.075000000000000000e+01
5.900000000000000000e+01 6.269307692307694424e+02 3.736174011230468750e+02 5.663146972656250000e-01 0.000000000000000000e+00 0.000000000000000000e+00 2.213098632812500000e+03 2.013850927352905273e+00 4.000000000000000000e+00 1.785704803466796875e+02 3.975000000000000000e+01 6.075000000000000000e+01
5.500000000000000000e+01 6.665615384615385892e+02 3.795745849609375000e+02 4.997558593750000000e-01 0.000000000000000000e+00 0.000000000000000000e+00 2.207405517578125000e+03 1.995816230773925781e+00 4.000000000000000000e+00 1.803211517333984375e+02 4.025000000000000000e+01 6.075000000000000000e+01
6.500000000000000000e+01 6.490538461538461661e+02 3.741808776855468750e+02 4.331970214843750000e-01 0.000000000000000000e+00 0.000000000000000000e+00 2.201712402343750000e+03 1.990074276924133301e+00 4.000000000000000000e+00 1.774266815185546875e+02 4.075000000000000000e+01 6.075000000000000000e+01
6.700000000000000000e+01 6.448384615384615017e+02 3.585668640136718750e+02 3.666381835937500000e-01 0.000000000000000000e+00 5.882352963089942932e-02 2.196019042968750000e+03 1.996657609939575195e+00 4.000000000000000000e+00 2.179660186767578125e+02 4.125000000000000000e+01 6.075000000000000000e+01
5.200000000000000000e+01 6.137000000000001592e+02 3.416638488769531250e+02 2.687072753906250000e-01 0.000000000000000000e+00 0.000000000000000000e+00 2.185616210937500000e+03 1.714076399803161621e+00 4.000000000000000000e+00 1.567240447998046875e+02 4.175000000000000000e+01 6.075000000000000000e+01
6.500000000000000000e+01 6.035923076923074859e+02 3.314440307617187500e+02 1.708068847656250000e-01 0.000000000000000000e+00 0.000000000000000000e+00 2.175213378906250000e+03 1.180255293846130371e+00 4.000000000000000000e+00 1.563717956542968750e+02 4.225000000000000000e+01 6.075000000000000000e+01
4.000000000000000000e+01 5.904461538461538339e+02 3.292787475585937500e+02 7.290649414062500000e-02 0.000000000000000000e+00 0.000000000000000000e+00 2.164810546875000000e+03 2.017354965209960938e+00 3.000000000000000000e+00 1.243980178833007812e+02 4.275000000000000000e+01 6.075000000000000000e+01
6.500000000000000000e+01 6.074769230769232990e+02 3.300284118652343750e+02 -2.758789062500000000e-02 0.000000000000000000e+00 0.000000000000000000e+00 2.154174072265625000e+03 2.009446859359741211e+00 4.000000000000000000e+00 1.253462371826171875e+02 4.325000000000000000e+01 6.075000000000000000e+01
3.800000000000000000e+01 6.137769230769230262e+02 3.315078735351562500e+02 -1.358032226562500000e-01 0.000000000000000000e+00 5.882352963089942932e-02 2.142836669921875000e+03 2.001546859741210938e+00 3.000000000000000000e+00 1.207083740234375000e+02 4.375000000000000000e+01 6.075000000000000000e+01
5.100000000000000000e+01 6.190153846153848463e+02 3.331972045898437500e+02 -2.439880371093750000e-01 0.000000000000000000e+00 0.000000000000000000e+00 2.131499023437500000e+03 2.000046253204345703e+00 4.000000000000000000e+00 1.511902618408203125e+02 4.425000000000000000e+01 6.075000000000000000e+01
6.300000000000000000e+01 6.207846153846152220e+02 3.355325317382812500e+02 -3.522033691406250000e-01 0.000000000000000000e+00 2.352941185235977173e-01 2.120161621093750000e+03 2.001331567764282227e+00 4.000000000000000000e+00 1.553637390136718750e+02 4.475000000000000000e+01 6.075000000000000000e+01
6.300000000000000000e+01 6.272692307692307168e+02 3.399066467285156250e+02 -4.394531250000000000e-01 0.000000000000000000e+00 0.000000000000000000e+00 2.110144287109375000e+03 1.887115955352783203e+00 4.000000000000000000e+00 1.385927581787109375e+02 4.525000000000000000e+01 6.075000000000000000e+01
5.500000000000000000e+01 6.297769230769231399e+02 3.420338134765625000e+02 -5.057373046875000000e-01 0.000000000000000000e+00 0.000000000000000000e+00 2.101447021484375000e+03 1.379682779312133789e+00 4.000000000000000000e+00 1.480544433593750000e+02 4.575000000000000000e+01 6.075000000000000000e+01
6.300000000000000000e+01 6.179615384615382254e+02 3.448874816894531250e+02 -6.383361816406250000e-01 0.000000000000000000e+00 2.941176593303680420e-01 2.084052490234375000e+03 1.934954881668090820e+00 4.000000000000000000e+00 1.703052062988281250e+02 4.675000000000000000e+01 6.075000000000000000e+01
4.100000000000000000e+01 6.166307692307689194e+02 3.479268798828125000e+02 -6.696472167968750000e-01 0.000000000000000000e+00 0.000000000000000000e+00 2.079992675781250000e+03 1.186012148857116699e+00 3.000000000000000000e+00 1.352126312255859375e+02 4.725000000000000000e+01 6.075000000000000000e+01
1.900000000000000000e+01 6.055000000000001137e+02 3.516629028320312500e+02 -6.893310546875000000e-01 0.000000000000000000e+00 0.000000000000000000e+00 2.077478515625000000e+03 1.171230077743530273e+00 1.000000000000000000e+00 1.302631988525390625e+02 4.775000000000000000e+01 6.075000000000000000e+01
2.300000000000000000e+01 6.072384615384615927e+02 3.544395141601562500e+02 -7.089843750000000000e-01 0.000000000000000000e+00 0.000000000000000000e+00 2.074964355468750000e+03 8.186164498329162598e-01 3.000000000000000000e+00 1.770975341796875000e+02 4.825000000000000000e+01 6.075000000000000000e+01
6.400000000000000000e+01 6.189999999999993179e+02 3.527245483398437500e+02 -7.286376953125000000e-01 0.000000000000000000e+00 2.352941185235977173e-01 2.072450439453125000e+03 8.191157579421997070e-01 4.000000000000000000e+00 1.653570861816406250e+02 4.875000000000000000e+01 6.075000000000000000e+01
6.400000000000000000e+01 6.277846153846152220e+02 3.520903320312500000e+02 -7.364807128906250000e-01 0.000000000000000000e+00 0.000000000000000000e+00 2.069923339843750000e+03 8.187758922576904297e-01 4.000000000000000000e+00 1.687285308837890625e+02 4.925000000000000000e+01 6.075000000000000000e+01
7.600000000000000000e+01 6.348769230769229353e+02 3.532133789062500000e+02 -7.443542480468750000e-01 0.000000000000000000e+00 0.000000000000000000e+00 2.067396484375000000e+03 8.195770978927612305e-01 4.000000000000000000e+00 1.968005065917968750e+02 4.975000000000000000e+01 6.075000000000000000e+01
1.300000000000000000e+01 6.289615384615384528e+02 3.530685729980468750e+02 -7.521972656250000000e-01 0.000000000000000000e+00 0.000000000000000000e+00 2.064869628906250000e+03 8.797097802162170410e-01 1.000000000000000000e+00 1.202810745239257812e+02 5.025000000000000000e+01 6.075000000000000000e+01
6.700000000000000000e+01 6.253307692307693060e+02 3.523806152343750000e+02 -7.689819335937500000e-01 0.000000000000000000e+00 0.000000000000000000e+00 2.060581054687500000e+03 1.197141885757446289e+00 4.000000000000000000e+00 1.769331054687500000e+02 5.075000000000000000e+01 6.075000000000000000e+01
6.300000000000000000e+01 6.288461538461539249e+02 3.515824279785156250e+02 -8.125610351562500000e-01 0.000000000000000000e+00 0.000000000000000000e+00 2.051007812500000000e+03 1.907698035240173340e+00 4.000000000000000000e+00 1.751891479492187500e+02 5.125000000000000000e+01 6.075000000000000000e+01
2.700000000000000000e+01 6.325384615384615472e+02 3.524680786132812500e+02 -8.561401367187500000e-01 0.000000000000000000e+00 2.941176593303680420e-01 2.041434326171875000e+03 1.582965016365051270e+00 3.000000000000000000e+00 2.161265411376953125e+02 5.175000000000000000e+01 6.075000000000000000e+01
6.400000000000000000e+01 6.249769230769231854e+02 3.547246704101562500e+02 -8.997192382812500000e-01 0.000000000000000000e+00 2.941176593303680420e-01 2.031860961914062500e+03 2.015817880630493164e+00 4.000000000000000000e+00 2.115337066650390625e+02 5.225000000000000000e+01 6.075000000000000000e+01
5.000000000000000000e+01 6.298230769230769965e+02 3.581263427734375000e+02 -9.812927246093750000e-01 0.000000000000000000e+00 0.000000000000000000e+00 2.018777954101562500e+03 2.009373426437377930e+00 4.000000000000000000e+00 1.996138458251953125e+02 5.275000000000000000e+01 6.075000000000000000e+01
6.900000000000000000e+01 6.305692307692308987e+02 3.611538696289062500e+02 -1.100860595703125000e+00 0.000000000000000000e+00 2.352941185235977173e-01 2.002185180664062500e+03 1.999432563781738281e+00 4.000000000000000000e+00 1.852635040283203125e+02 5.325000000000000000e+01 6.075000000000000000e+01
3.800000000000000000e+01 6.360076923076924231e+02 3.642001647949218750e+02 -1.220428466796875000e+00 0.000000000000000000e+00 2.352941185235977173e-01 1.985592407226562500e+03 1.928869485855102539e+00 3.000000000000000000e+00 2.215072021484375000e+02 5.375000000000000000e+01 6.075000000000000000e+01
5.700000000000000000e+01 6.441384615384613426e+02 3.684588928222656250e+02 -1.340026855468750000e+00 0.000000000000000000e+00 0.000000000000000000e+00 1.968999633789062500e+03 1.975735068321228027e+00 4.000000000000000000e+00 2.210894622802734375e+02 5.425000000000000000e+01 6.075000000000000000e+01
6.100000000000000000e+01 6.614615384615385665e+02 3.768068847656250000e+02 -1.509338378906250000e+00 0.000000000000000000e+00 2.352941185235977173e-01 1.950380004882812500e+03 1.783841371536254883e+00 4.000000000000000000e+00 1.891984405517578125e+02 5.475000000000000000e+01 6.075000000000000000e+01
6.800000000000000000e+01 6.764999999999998863e+02 3.940758666992187500e+02 -1.695251464843750000e+00 0.000000000000000000e+00 0.000000000000000000e+00 1.931084716796875000e+03 1.980280518531799316e+00 4.000000000000000000e+00 1.628851623535156250e+02 5.525000000000000000e+01 6.075000000000000000e+01
6.800000000000000000e+01 6.896000000000004775e+02 4.148280639648437500e+02 -1.881134033203125000e+00 0.000000000000000000e+00 0.000000000000000000e+00 1.911789306640625000e+03 1.158770918846130371e+00 4.000000000000000000e+00 1.765562286376953125e+02 5.575000000000000000e+01 6.075000000000000000e+01
6.700000000000000000e+01 7.039538461538463707e+02 4.321589965820312500e+02 -2.067047119140625000e+00 9.999999776482582092e-03 0.000000000000000000e+00 1.892494018554687500e+03 1.852699637413024902e+00 4.000000000000000000e+00 2.108076934814453125e+02 5.625000000000000000e+01 6.075000000000000000e+01
2.500000000000000000e+01 7.103846153846152447e+02 4.403554382324218750e+02 -2.215362548828125000e+00 9.999999776482582092e-03 0.000000000000000000e+00 1.875848632812500000e+03 1.933533549308776855e+00 3.000000000000000000e+00 2.010334167480468750e+02 5.675000000000000000e+01 6.075000000000000000e+01
7.200000000000000000e+01 7.063230769230768828e+02 4.401487731933593750e+02 -2.363647460937500000e+00 9.999999776482582092e-03 0.000000000000000000e+00 1.859203125000000000e+03 1.900941252708435059e+00 4.000000000000000000e+00 2.641528320312500000e+02 5.725000000000000000e+01 6.075000000000000000e+01
5.600000000000000000e+01 6.933999999999998636e+02 4.292858886718750000e+02 -2.511932373046875000e+00 9.999999776482582092e-03 2.941176593303680420e-01 1.842557739257812500e+03 1.860636472702026367e+00 4.000000000000000000e+00 2.998244628906250000e+02 5.775000000000000000e+01 6.075000000000000000e+01
7.500000000000000000e+01 6.819307692307691013e+02 3.996035766601562500e+02 -2.637268066406250000e+00 1.522077769041061401e-01 0.000000000000000000e+00 1.829478027343750000e+03 1.807710409164428711e+00 4.000000000000000000e+00 4.218287353515625000e+02 5.825000000000000000e+01 6.075000000000000000e+01
7.200000000000000000e+01 6.673307692307690786e+02 3.568432312011718750e+02 -2.693725585937500000e+00 9.999999776482582092e-03 0.000000000000000000e+00 1.827095458984375000e+03 1.747155427932739258e+00 4.000000000000000000e+00 2.448694610595703125e+02 5.875000000000000000e+01 6.075000000000000000e+01
7.000000000000000000e+01 6.496923076923073950e+02 3.176573791503906250e+02 -2.750152587890625000e+00 2.380218356847763062e-01 0.000000000000000000e+00 1.824713012695312500e+03 1.728765130043029785e+00 4.000000000000000000e+00 5.233076782226562500e+02 5.925000000000000000e+01 6.075000000000000000e+01
6.900000000000000000e+01 6.023000000000000682e+02 2.972515869140625000e+02 -2.806610107421875000e+00 9.999999776482582092e-03 2.352941185235977173e-01 1.822330444335937500e+03 1.786939620971679688e+00 4.000000000000000000e+00 2.670961608886718750e+02 5.975000000000000000e+01 6.075000000000000000e+01
4.700000000000000000e+01 5.641461538461541068e+02 2.891517333984375000e+02 -2.791625976562500000e+00 9.999999776482582092e-03 2.352941185235977173e-01 1.831171508789062500e+03 1.862939238548278809e+00 4.000000000000000000e+00 2.008347930908203125e+02 6.025000000000000000e+01 6.075000000000000000e+01
2.600000000000000000e+01 5.515230769230769283e+02 2.825025024414062500e+02 -2.705230712890625000e+00 9.999999776482582092e-03 0.000000000000000000e+00 1.851236083984375000e+03 1.910729289054870605e+00 3.000000000000000000e+00 1.139537048339843750e+02 6.075000000000000000e+01 6.075000000000000000e+01
3.500000000000000000e+01 5.438153846153848008e+02 2.760561828613281250e+02 -2.618835449218750000e+00 9.999999776482582092e-03 5.882353186607360840e-01 1.871300659179687500e+03 1.937978386878967285e+00 3.000000000000000000e+00 1.299955596923828125e+02 6.125000000000000000e+01 6.075000000000000000e+01
6.200000000000000000e+01 5.454000000000003183e+02 2.671868286132812500e+02 -2.532409667968750000e+00 9.999999776482582092e-03 2.941176593303680420e-01 1.891365234375000000e+03 1.948004841804504395e+00 4.000000000000000000e+00 9.566086578369140625e+01 6.175000000000000000e+01 6.075000000000000000e+01
4.000000000000000000e+01 5.412076923076921275e+02 2.563494873046875000e+02 -2.421264648437500000e+00 9.999999776482582092e-03 2.352941185235977173e-01 1.908545288085937500e+03 1.946312308311462402e+00 3.000000000000000000e+00 6.819770812988281250e+01 6.225000000000000000e+01 6.075000000000000000e+01
1.500000000000000000e+01 5.444615384615383391e+02 2.450706176757812500e+02 -2.301849365234375000e+00 9.999999776482582092e-03 0.000000000000000000e+00 1.924763793945312500e+03 1.946832418441772461e+00 1.000000000000000000e+00 9.835849761962890625e+01 6.275000000000000000e+01 6.075000000000000000e+01
2.200000000000000000e+01 5.436692307692309214e+02 2.342275543212890625e+02 -2.182434082031250000e+00 9.999999776482582092e-03 2.941176593303680420e-01 1.940982421875000000e+03 1.944428801536560059e+00 3.000000000000000000e+00 6.869570159912109375e+01 6.325000000000000000e+01 6.075000000000000000e+01
5.000000000000000000e+00 5.455846153846152902e+02 2.257380371093750000e+02 -2.063018798828125000e+00 9.999999776482582092e-03 3.529411852359771729e-01 1.957201049804687500e+03 1.936294913291931152e+00 1.000000000000000000e+00 7.331973266601562500e+01 6.375000000000000000e+01 6.075000000000000000e+01
1.300000000000000000e+01 5.714615384615387939e+02 2.593977050781250000e+02 -1.868835449218750000e+00 9.999999776482582092e-03 0.000000000000000000e+00 1.987005493164062500e+03 1.693122386932373047e+00 1.000000000000000000e+00 6.588290405273437500e+01 6.575000000000000000e+01 6.075000000000000000e+01
8.000000000000000000e+00 5.706461538461539931e+02 2.703584594726562500e+02 -1.915008544921875000e+00 9.999999776482582092e-03 0.000000000000000000e+00 1.983519653320312500e+03 1.821436405181884766e+00 1.000000000000000000e+00 6.351916503906250000e+01 6.625000000000000000e+01 6.075000000000000000e+01
8.000000000000000000e+00 5.637384615384615927e+02 2.844089355468750000e+02 -1.961151123046875000e+00 9.999999776482582092e-03 0.000000000000000000e+00 1.980033813476562500e+03 1.930422186851501465e+00 1.000000000000000000e+00 7.897666931152343750e+01 6.675000000000000000e+01 6.075000000000000000e+01
1.000000000000000000e+01 5.596769230769233445e+02 2.978793029785156250e+02 -2.007324218750000000e+00 9.999999776482582092e-03 0.000000000000000000e+00 1.976547973632812500e+03 1.926345109939575195e+00 1.000000000000000000e+00 7.089347076416015625e+01 6.725000000000000000e+01 6.075000000000000000e+01
8.000000000000000000e+00 1.599507692307691968e+03 6.047651367187500000e+02 2.472991943359375000e+00 0.000000000000000000e+00 0.000000000000000000e+00 1.630760253906250000e+03 1.390889883041381836e+00 1.000000000000000000e+00 1.026418334960937500e+03 6.750000000000000000e+00 6.125000000000000000e+01
1.000000000000000000e+01 7.222076923076921275e+02 4.713018493652343750e+02 3.412475585937500000e-01 0.000000000000000000e+00 0.000000000000000000e+00 1.201814941406250000e+03 1.298622369766235352e+00 1.000000000000000000e+00 7.606001586914062500e+02 7.750000000000000000e+00 6.125000000000000000e+01
1.000000000000000000e+00 9.882923076923076451e+02 4.828837280273437500e+02 -7.543945312500000000e-02 1.133814230561256409e-01 0.000000000000000000e+00 1.212232910156250000e+03 1.146736621856689453e+00 1.000000000000000000e+00 1.166664672851562500e+03 8.250000000000000000e+00 6.125000000000000000e+01
1.000000000000000000e+01 6.798230769230766555e+02 3.542939453125000000e+02 -9.088134765625000000e-01 9.999999776482582092e-03 0.000000000000000000e+00 1.233068847656250000e+03 1.451114177703857422e+00 1.000000000000000000e+00 1.037803710937500000e+03 9.250000000000000000e+00 6.125000000000000000e+01
1.900000000000000000e+01 7.110307692307690104e+02 3.787831726074218750e+02 -1.146789550781250000e+00 0.000000000000000000e+00 0.000000000000000000e+00 1.273197021484375000e+03 1.609922409057617188e+00 1.000000000000000000e+00 9.038737792968750000e+02 9.750000000000000000e+00 6.125000000000000000e+01
5.800000000000000000e+01 7.171153846153849827e+02 4.253820800781250000e+02 -1.682067871093750000e+00 0.000000000000000000e+00 0.000000000000000000e+00 1.423291503906250000e+03 1.674708604812622070e+00 4.000000000000000000e+00 4.350268249511718750e+02 1.125000000000000000e+01 6.125000000000000000e+01
6.000000000000000000e+01 7.362999999999998408e+02 3.838757324218750000e+02 -1.225036621093750000e+00 0.000000000000000000e+00 0.000000000000000000e+00 1.512884033203125000e+03 1.682761788368225098e+00 4.000000000000000000e+00 5.182606201171875000e+02 1.225000000000000000e+01 6.125000000000000000e+01
5.800000000000000000e+01 7.762769230769234809e+02 3.770252380371093750e+02 -9.964904785156250000e-01 0.000000000000000000e+00 0.000000000000000000e+00 1.557680419921875000e+03 1.693429231643676758e+00 4.000000000000000000e+00 4.963398742675781250e+02 1.275000000000000000e+01 6.125000000000000000e+01
4.900000000000000000e+01 7.325461538461536293e+02 3.787646789550781250e+02 -6.960144042968750000e-01 0.000000000000000000e+00 0.000000000000000000e+00 1.613137573242187500e+03 1.752790451049804688e+00 4.000000000000000000e+00 5.418764648437500000e+02 1.325000000000000000e+01 6.125000000000000000e+01
5.600000000000000000e+01 7.332615384615381799e+02 3.872948608398437500e+02 -1.796569824218750000e-01 0.000000000000000000e+00 0.000000000000000000e+00 1.700577392578125000e+03 1.795949935913085938e+00 4.000000000000000000e+00 4.053057556152343750e+02 1.375000000000000000e+01 6.125000000000000000e+01
5.600000000000000000e+01 7.395538461538460524e+02 3.797622985839843750e+02 3.367004394531250000e-01 0.000000000000000000e+00 0.000000000000000000e+00 1.788017211914062500e+03 1.807876586914062500e+00 4.000000000000000000e+00 3.680341186523437500e+02 1.425000000000000000e+01 6.125000000000000000e+01
5.700000000000000000e+01 6.915230769230771557e+02 3.546225280761718750e+02 8.530578613281250000e-01 0.000000000000000000e+00 0.000000000000000000e+00 1.875457031250000000e+03 1.822224497795104980e+00 4.000000000000000000e+00 3.550569763183593750e+02 1.475000000000000000e+01 6.125000000000000000e+01
4.200000000000000000e+01 6.801307692307693742e+02 3.272793579101562500e+02 1.389099121093750000e+00 0.000000000000000000e+00 0.000000000000000000e+00 1.965131469726562500e+03 1.827853798866271973e+00 3.000000000000000000e+00 3.707372436523437500e+02 1.525000000000000000e+01 6.125000000000000000e+01
6.700000000000000000e+01 7.084076923076924004e+02 3.137272644042968750e+02 1.944824218750000000e+00 0.000000000000000000e+00 0.000000000000000000e+00 2.057040771484375000e+03 1.824686527252197266e+00 4.000000000000000000e+00 2.609703063964843750e+02 1.575000000000000000e+01 6.125000000000000000e+01
8.000000000000000000e+00 6.016692307692306940e+02 3.179450683593750000e+02 4.672332763671875000e+00 0.000000000000000000e+00 0.000000000000000000e+00 2.558137695312500000e+03 2.066497087478637695e+00 1.000000000000000000e+00 5.045358276367187500e+01 2.225000000000000000e+01 6.125000000000000000e+01
3.000000000000000000e+01 6.139538461538460297e+02 3.267754211425781250e+02 4.349761962890625000e+00 0.000000000000000000e+00 0.000000000000000000e+00 2.554077636718750000e+03 2.055608510971069336e+00 3.000000000000000000e+00 7.426898956298828125e+01 2.275000000000000000e+01 6.125000000000000000e+01
5.400000000000000000e+01 6.063615384615389985e+02 3.284058227539062500e+02 4.012084960937500000e+00 0.000000000000000000e+00 0.000000000000000000e+00 2.538395263671875000e+03 2.038638830184936523e+00 4.000000000000000000e+00 1.183589706420898438e+02 2.325000000000000000e+01 6.125000000000000000e+01
3.100000000000000000e+01 5.704076923076920593e+02 3.296809082031250000e+02 3.674407958984375000e+00 0.000000000000000000e+00 0.000000000000000000e+00 2.522712890625000000e+03 2.032586097717285156e+00 3.000000000000000000e+00 8.944499969482421875e+01 2.375000000000000000e+01 6.125000000000000000e+01
5.900000000000000000e+01 5.511076923076923322e+02 3.331925354003906250e+02 3.336730957031250000e+00 0.000000000000000000e+00 0.000000000000000000e+00 2.507030517578125000e+03 2.034439325332641602e+00 4.000000000000000000e+00 1.093099136352539062e+02 2.425000000000000000e+01 6.125000000000000000e+01
6.000000000000000000e+01 5.709692307692306485e+02 3.381329040527343750e+02 3.011596679687500000e+00 0.000000000000000000e+00 0.000000000000000000e+00 2.483585449218750000e+03 2.035087108612060547e+00 4.000000000000000000e+00 1.186377487182617188e+02 2.475000000000000000e+01 6.125000000000000000e+01
5.900000000000000000e+01 5.900923076923077133e+02 3.450264587402343750e+02 2.690643310546875000e+00 0.000000000000000000e+00 0.000000000000000000e+00 2.457552978515625000e+03 2.037586927413940430e+00 4.000000000000000000e+00 1.583281555175781250e+02 2.525000000000000000e+01 6.125000000000000000e+01
4.600000000000000000e+01 6.250076923076923094e+02 3.590567321777343750e+02 2.048736572265625000e+00 0.000000000000000000e+00 0.000000000000000000e+00 2.405487792968750000e+03 2.048061609268188477e+00 4.000000000000000000e+00 9.357867431640625000e+01 2.625000000000000000e+01 6.125000000000000000e+01
5.000000000000000000e+01 6.167615384615384073e+02 3.703807067871093750e+02 1.829376220703125000e+00 0.000000000000000000e+00 0.000000000000000000e+00 2.386642822265625000e+03 2.052661180496215820e+00 4.000000000000000000e+00 9.716799163818359375e+01 2.675000000000000000e+01 6.125000000000000000e+01
2.100000000000000000e+01 6.114846153846153811e+02 3.736478271484375000e+02 1.610015869140625000e+00 0.000000000000000000e+00 0.000000000000000000e+00 2.367797607421875000e+03 2.058884382247924805e+00 3.000000000000000000e+00 8.234208679199218750e+01 2.725000000000000000e+01 6.125000000000000000e+01
4.900000000000000000e+01 5.971999999999999318e+02 3.727662658691406250e+02 9.834899902343750000e-01 0.000000000000000000e+00 0.000000000000000000e+00 2.305356445312500000e+03 2.085351705551147461e+00 4.000000000000000000e+00 9.300743103027343750e+01 2.925000000000000000e+01 6.125000000000000000e+01
4.600000000000000000e+01 6.880923076923080544e+02 3.464572143554687500e+02 6.212158203125000000e-01 0.000000000000000000e+00 0.000000000000000000e+00 2.213115234375000000e+03 1.990436315536499023e+00 4.000000000000000000e+00 1.179143142700195312e+02 3.375000000000000000e+01 6.125000000000000000e+01
5.900000000000000000e+01 6.923769230769231626e+02 3.367792663574218750e+02 7.226562500000000000e-01 0.000000000000000000e+00 0.000000000000000000e+00 2.214104003906250000e+03 1.989845275878906250e+00 4.000000000000000000e+00 1.462811584472656250e+02 3.425000000000000000e+01 6.125000000000000000e+01
6.300000000000000000e+01 6.629307692307694424e+02 3.262782287597656250e+02 8.240966796875000000e-01 0.000000000000000000e+00 3.529411852359771729e-01 2.215092773437500000e+03 2.322358369827270508e+00 4.000000000000000000e+00 5.110121917724609375e+01 3.475000000000000000e+01 6.125000000000000000e+01
6.900000000000000000e+01 6.814000000000000909e+02 3.152083129882812500e+02 9.255065917968750000e-01 0.000000000000000000e+00 0.000000000000000000e+00 2.216081787109375000e+03 3.125921487808227539e+00 4.000000000000000000e+00 8.083142852783203125e+01 3.525000000000000000e+01 6.125000000000000000e+01
3.400000000000000000e+01 6.756153846153843006e+02 3.112854614257812500e+02 7.023620605468750000e-01 0.000000000000000000e+00 0.000000000000000000e+00 2.187374755859375000e+03 2.026484489440917969e+00 3.000000000000000000e+00 2.173093872070312500e+02 3.725000000000000000e+01 6.125000000000000000e+01
4.600000000000000000e+01 6.550307692307688967e+02 3.311764526367187500e+02 6.405639648437500000e-01 0.000000000000000000e+00 0.000000000000000000e+00 2.182415771484375000e+03 2.028256893157958984e+00 4.000000000000000000e+00 2.265850677490234375e+02 3.775000000000000000e+01 6.125000000000000000e+01
5.800000000000000000e+01 6.514692307692309896e+02 3.469757995605468750e+02 6.089782714843750000e-01 0.000000000000000000e+00 0.000000000000000000e+00 2.181558837890625000e+03 2.028182506561279297e+00 4.000000000000000000e+00 1.522736511230468750e+02 3.825000000000000000e+01 6.125000000000000000e+01
7.300000000000000000e+01 6.376307692307696016e+02 3.762522277832031250e+02 5.458679199218750000e-01 0.000000000000000000e+00 0.000000000000000000e+00 2.179845214843750000e+03 2.016244649887084961e+00 4.000000000000000000e+00 1.698323059082031250e+02 3.925000000000000000e+01 6.125000000000000000e+01
5.400000000000000000e+01 6.268923076923075541e+02 3.877141113281250000e+02 4.797973632812500000e-01 0.000000000000000000e+00 0.000000000000000000e+00 2.173814453125000000e+03 2.000678539276123047e+00 4.000000000000000000e+00 1.750230407714843750e+02 3.975000000000000000e+01 6.125000000000000000e+01
5.600000000000000000e+01 6.866846153846151992e+02 3.925133972167968750e+02 4.022521972656250000e-01 0.000000000000000000e+00 0.000000000000000000e+00 2.166059326171875000e+03 1.978463411331176758e+00 4.000000000000000000e+00 1.171760101318359375e+02 4.025000000000000000e+01 6.125000000000000000e+01
6.600000000000000000e+01 6.695076923076923094e+02 3.845998229980468750e+02 3.247070312500000000e-01 0.000000000000000000e+00 0.000000000000000000e+00 2.158303955078125000e+03 1.971029639244079590e+00 4.000000000000000000e+00 1.864162445068359375e+02 4.075000000000000000e+01 6.125000000000000000e+01
5.800000000000000000e+01 6.412999999999998408e+02 3.615416564941406250e+02 2.471618652343750000e-01 0.000000000000000000e+00 0.000000000000000000e+00 2.150548828125000000e+03 1.978190898895263672e+00 4.000000000000000000e+00 1.798002319335937500e+02 4.125000000000000000e+01 6.125000000000000000e+01
7.400000000000000000e+01 6.216538461538460751e+02 3.386549377441406250e+02 1.283569335937500000e-01 0.000000000000000000e+00 0.000000000000000000e+00 2.137815673828125000e+03 1.985013961791992188e+00 4.000000000000000000e+00 1.519254760742187500e+02 4.175000000000000000e+01 6.125000000000000000e+01
6.000000000000000000e+01 5.924076923076925141e+02 3.253204040527343750e+02 9.552001953125000000e-03 0.000000000000000000e+00 0.000000000000000000e+00 2.125082519531250000e+03 2.007800817489624023e+00 4.000000000000000000e+00 9.237566375732421875e+01 4.225000000000000000e+01 6.125000000000000000e+01
4.400000000000000000e+01 5.658538461538456659e+02 3.225668945312500000e+02 -1.092529296875000000e-01 0.000000000000000000e+00 2.941176593303680420e-01 2.112349365234375000e+03 2.013079643249511719e+00 3.000000000000000000e+00 9.944871520996093750e+01 4.275000000000000000e+01 6.125000000000000000e+01
5.400000000000000000e+01 6.017153846153846644e+02 3.218271484375000000e+02 -2.313537597656250000e-01 0.000000000000000000e+00 0.000000000000000000e+00 2.099373779296875000e+03 2.000612258911132812e+00 4.000000000000000000e+00 1.620386962890625000e+02 4.325000000000000000e+01 6.125000000000000000e+01
6.400000000000000000e+01 6.116846153846156540e+02 3.208089599609375000e+02 -3.634338378906250000e-01 0.000000000000000000e+00 5.294117927551269531e-01 2.085671142578125000e+03 1.983117341995239258e+00 4.000000000000000000e+00 1.483992309570312500e+02 4.375000000000000000e+01 6.125000000000000000e+01
6.100000000000000000e+01 6.288923076923073268e+02 3.194263000488281250e+02 -4.955139160156250000e-01 0.000000000000000000e+00 0.000000000000000000e+00 2.071968505859375000e+03 1.973604083061218262e+00 4.000000000000000000e+00 1.856205596923828125e+02 4.425000000000000000e+01 6.125000000000000000e+01
6.100000000000000000e+01 6.315307692307693515e+02 3.205653991699218750e+02 -6.276245117187500000e-01 0.000000000000000000e+00 0.000000000000000000e+00 2.058265869140625000e+03 1.969241023063659668e+00 4.000000000000000000e+00 9.347317504882812500e+01 4.475000000000000000e+01 6.125000000000000000e+01
7.000000000000000000e+01 6.309153846153847098e+02 3.257906799316406250e+02 -7.349853515625000000e-01 0.000000000000000000e+00 0.000000000000000000e+00 2.046203613281250000e+03 1.967704415321350098e+00 4.000000000000000000e+00 1.475811462402343750e+02 4.525000000000000000e+01 6.125000000000000000e+01
6.500000000000000000e+01 6.309923076923079179e+02 3.302323608398437500e+02 -8.176879882812500000e-01 0.000000000000000000e+00 0.000000000000000000e+00 2.035781616210937500e+03 1.970754504203796387e+00 4.000000000000000000e+00 2.281150512695312500e+02 4.575000000000000000e+01 6.125000000000000000e+01
5.000000000000000000e+01 6.085230769230768146e+02 3.332257690429687500e+02 -9.003601074218750000e-01 0.000000000000000000e+00 0.000000000000000000e+00 2.025359619140625000e+03 1.790377855300903320e+00 4.000000000000000000e+00 1.800630950927734375e+02 4.625000000000000000e+01 6.125000000000000000e+01
1.300000000000000000e+01 5.905769230769229807e+02 3.349230346679687500e+02 -9.830627441406250000e-01 0.000000000000000000e+00 0.000000000000000000e+00 2.014937744140625000e+03 1.480195879936218262e+00 1.000000000000000000e+00 7.233236694335937500e+01 4.675000000000000000e+01 6.125000000000000000e+01
5.700000000000000000e+01 5.966538461538461888e+02 3.361998901367187500e+02 -1.025604248046875000e+00 0.000000000000000000e+00 2.941176593303680420e-01 2.009786499023437500e+03 1.463965415954589844e+00 4.000000000000000000e+00 1.077812042236328125e+02 4.725000000000000000e+01 6.125000000000000000e+01
1.300000000000000000e+01 5.908538461538462343e+02 3.370140991210937500e+02 -1.054748535156250000e+00 0.000000000000000000e+00 2.941176593303680420e-01 2.006392089843750000e+03 1.499888539314270020e+00 1.000000000000000000e+00 1.005844116210937500e+02 4.775000000000000000e+01 6.125000000000000000e+01
[truncated: 347,531 more chars]
