# Supplementary material for: Environmental Conditions for Alternative Tree Cover States in HighLatitudes
Source: Copernicus journal article supplement (doi:10.5194/bg-2016-401), 2016-10-11
Supplement: Supplementary file 4 [file bg-2016-401-supplement.zip › Analysis/files_to_load_and_import/boreal_ea_west_russia_database.txt]

8.000000000000000000e+00 5.858769230769230489e+02 3.355695800781250000e+02 4.976531982421875000e+00 0.000000000000000000e+00 2.176470518112182617e+00 3.331287841796875000e+03 3.954276561737060547e+00 4.000000000000000000e+00 1.000000000000000000e+00 1.128058624267578125e+02 3.325000000000000000e+01 5.025000000000000000e+01
1.100000000000000000e+01 5.771692307692309214e+02 3.020957946777343750e+02 4.890014648437500000e+00 0.000000000000000000e+00 1.823529362678527832e+00 3.318977294921875000e+03 3.929584741592407227e+00 4.000000000000000000e+00 1.000000000000000000e+00 1.376412353515625000e+02 3.475000000000000000e+01 5.025000000000000000e+01
1.000000000000000000e+00 5.086000000000001364e+02 2.956375427246093750e+02 5.121643066406250000e+00 0.000000000000000000e+00 1.941176414489746094e+00 3.429851806640625000e+03 3.954874038696289062e+00 4.000000000000000000e+00 1.000000000000000000e+00 1.410500335693359375e+02 4.025000000000000000e+01 5.025000000000000000e+01
2.000000000000000000e+00 4.949615384615383959e+02 2.926911926269531250e+02 5.001281738281250000e+00 0.000000000000000000e+00 2.000000000000000000e+00 3.440684326171875000e+03 3.948700428009033203e+00 4.000000000000000000e+00 1.000000000000000000e+00 1.269865188598632812e+02 4.125000000000000000e+01 5.025000000000000000e+01
7.000000000000000000e+00 4.666153846153843574e+02 2.844582519531250000e+02 4.933166503906250000e+00 0.000000000000000000e+00 1.470588207244873047e+00 3.452236083984375000e+03 3.960728168487548828e+00 4.000000000000000000e+00 1.000000000000000000e+00 1.366279449462890625e+02 4.175000000000000000e+01 5.025000000000000000e+01
0.000000000000000000e+00 4.397076923076921275e+02 2.676234436035156250e+02 4.753540039062500000e+00 0.000000000000000000e+00 2.411764621734619141e+00 3.491139160156250000e+03 3.982270240783691406e+00 4.000000000000000000e+00 1.000000000000000000e+00 1.193383712768554688e+02 4.325000000000000000e+01 5.025000000000000000e+01
1.000000000000000000e+00 3.490076923076922526e+02 2.209643859863281250e+02 5.210510253906250000e+00 0.000000000000000000e+00 1.705882310867309570e+00 3.710172851562500000e+03 4.098303318023681641e+00 8.000000000000000000e+00 1.000000000000000000e+00 4.948295593261718750e+01 4.675000000000000000e+01 5.025000000000000000e+01
4.000000000000000000e+00 3.338692307692307963e+02 2.004794311523437500e+02 5.265106201171875000e+00 0.000000000000000000e+00 2.470588207244873047e+00 3.732342529296875000e+03 4.096775054931640625e+00 8.000000000000000000e+00 1.000000000000000000e+00 4.101073837280273438e+01 4.725000000000000000e+01 5.025000000000000000e+01
1.000000000000000000e+00 3.232692307692306031e+02 1.834217834472656250e+02 5.304626464843750000e+00 0.000000000000000000e+00 2.529411792755126953e+00 3.750555908203125000e+03 4.090108871459960938e+00 3.000000000000000000e+00 1.000000000000000000e+00 3.416706466674804688e+01 4.775000000000000000e+01 5.025000000000000000e+01
1.000000000000000000e+00 3.304846153846155516e+02 1.770958099365234375e+02 5.344146728515625000e+00 0.000000000000000000e+00 1.117647051811218262e+00 3.768769287109375000e+03 4.085069656372070312e+00 3.000000000000000000e+00 1.000000000000000000e+00 2.636934661865234375e+01 4.825000000000000000e+01 5.025000000000000000e+01
1.000000000000000000e+00 3.415153846153845052e+02 1.739706573486328125e+02 5.383666992187500000e+00 0.000000000000000000e+00 2.117647171020507812e+00 3.786982666015625000e+03 4.084331989288330078e+00 3.000000000000000000e+00 1.000000000000000000e+00 1.766300392150878906e+01 4.875000000000000000e+01 5.025000000000000000e+01
1.000000000000000000e+00 3.446230769230768942e+02 1.656091308593750000e+02 5.307006835937500000e+00 0.000000000000000000e+00 1.882352948188781738e+00 3.777433105468750000e+03 4.094158649444580078e+00 4.000000000000000000e+00 1.000000000000000000e+00 1.249991226196289062e+01 4.925000000000000000e+01 5.025000000000000000e+01
1.000000000000000000e+00 3.395230769230767010e+02 1.555928802490234375e+02 5.230316162109375000e+00 0.000000000000000000e+00 2.294117689132690430e+00 3.767883300781250000e+03 4.091942310333251953e+00 4.000000000000000000e+00 1.000000000000000000e+00 6.677546977996826172e+00 4.975000000000000000e+01 5.025000000000000000e+01
1.000000000000000000e+00 3.273230769230768260e+02 1.455321807861328125e+02 5.153656005859375000e+00 0.000000000000000000e+00 2.235294103622436523e+00 3.758333496093750000e+03 4.088665008544921875e+00 6.000000000000000000e+00 1.000000000000000000e+00 1.100003242492675781e+01 5.025000000000000000e+01 5.025000000000000000e+01
1.000000000000000000e+00 3.106999999999998749e+02 1.359085083007812500e+02 5.062530517578125000e+00 0.000000000000000000e+00 2.058823585510253906e+00 3.744642822265625000e+03 4.089344978332519531e+00 3.000000000000000000e+00 1.000000000000000000e+00 1.301812934875488281e+01 5.075000000000000000e+01 5.025000000000000000e+01
0.000000000000000000e+00 2.926769230769231172e+02 1.327524719238281250e+02 4.928100585937500000e+00 0.000000000000000000e+00 8.235294222831726074e-01 3.718528320312500000e+03 4.086934089660644531e+00 3.000000000000000000e+00 1.000000000000000000e+00 1.114481639862060547e+01 5.125000000000000000e+01 5.025000000000000000e+01
1.000000000000000000e+00 2.820000000000001137e+02 1.336360778808593750e+02 4.793670654296875000e+00 0.000000000000000000e+00 1.352941155433654785e+00 3.692414062500000000e+03 4.075087070465087891e+00 4.000000000000000000e+00 1.000000000000000000e+00 3.199220466613769531e+01 5.175000000000000000e+01 5.025000000000000000e+01
1.000000000000000000e+00 2.789538461538460865e+02 1.338374481201171875e+02 4.659210205078125000e+00 0.000000000000000000e+00 2.117647171020507812e+00 3.666299804687500000e+03 4.071187496185302734e+00 4.000000000000000000e+00 1.000000000000000000e+00 2.151124763488769531e+01 5.225000000000000000e+01 5.025000000000000000e+01
2.000000000000000000e+00 2.855307692307692946e+02 1.342438049316406250e+02 4.522766113281250000e+00 0.000000000000000000e+00 1.823529362678527832e+00 3.637744140625000000e+03 4.069428443908691406e+00 4.000000000000000000e+00 1.000000000000000000e+00 3.546777343750000000e+01 5.275000000000000000e+01 5.025000000000000000e+01
0.000000000000000000e+00 2.966461538461538225e+02 1.393390350341796875e+02 4.245880126953125000e+00 0.000000000000000000e+00 2.470588207244873047e+00 3.575750732421875000e+03 4.027208328247070312e+00 4.000000000000000000e+00 1.000000000000000000e+00 9.765464782714843750e+01 5.375000000000000000e+01 5.025000000000000000e+01
0.000000000000000000e+00 2.974153846153845961e+02 1.441764984130859375e+02 4.107421875000000000e+00 0.000000000000000000e+00 2.647058725357055664e+00 3.544753906250000000e+03 3.991571903228759766e+00 4.000000000000000000e+00 1.000000000000000000e+00 1.476154479980468750e+02 5.425000000000000000e+01 5.025000000000000000e+01
1.000000000000000000e+00 3.024153846153845961e+02 1.523732757568359375e+02 3.950256347656250000e+00 0.000000000000000000e+00 1.882352948188781738e+00 3.506269042968750000e+03 3.960270404815673828e+00 4.000000000000000000e+00 1.000000000000000000e+00 2.235674896240234375e+02 5.475000000000000000e+01 5.025000000000000000e+01
1.000000000000000000e+00 3.051000000000000796e+02 1.631326293945312500e+02 3.786834716796875000e+00 0.000000000000000000e+00 2.411764621734619141e+00 3.465288330078125000e+03 3.938151359558105469e+00 4.000000000000000000e+00 1.000000000000000000e+00 1.815377655029296875e+02 5.525000000000000000e+01 5.025000000000000000e+01
1.000000000000000000e+00 3.110999999999999659e+02 1.747928009033203125e+02 3.623443603515625000e+00 0.000000000000000000e+00 3.058823585510253906e+00 3.424307617187500000e+03 3.918377399444580078e+00 4.000000000000000000e+00 1.000000000000000000e+00 2.139141387939453125e+02 5.575000000000000000e+01 5.025000000000000000e+01
1.000000000000000000e+00 3.201846153846153697e+02 1.910374450683593750e+02 3.298400878906250000e+00 0.000000000000000000e+00 2.823529481887817383e+00 3.350475097656250000e+03 3.843447208404541016e+00 4.000000000000000000e+00 1.000000000000000000e+00 2.893678894042968750e+02 5.675000000000000000e+01 5.025000000000000000e+01
4.000000000000000000e+00 3.221384615384615699e+02 1.951402130126953125e+02 3.136779785156250000e+00 0.000000000000000000e+00 2.000000000000000000e+00 3.317623535156250000e+03 3.813518524169921875e+00 4.000000000000000000e+00 1.000000000000000000e+00 2.218945312500000000e+02 5.725000000000000000e+01 5.025000000000000000e+01
1.000000000000000000e+00 3.171846153846154266e+02 1.948723449707031250e+02 2.975128173828125000e+00 0.000000000000000000e+00 2.470588207244873047e+00 3.284771728515625000e+03 3.773738861083984375e+00 3.000000000000000000e+00 1.000000000000000000e+00 3.391576232910156250e+02 5.775000000000000000e+01 5.025000000000000000e+01
0.000000000000000000e+00 2.946692307692306940e+02 1.855166320800781250e+02 2.758148193359375000e+00 0.000000000000000000e+00 2.294117689132690430e+00 3.263926025390625000e+03 3.787460088729858398e+00 4.000000000000000000e+00 1.000000000000000000e+00 3.055620117187500000e+02 5.875000000000000000e+01 5.025000000000000000e+01
0.000000000000000000e+00 2.834000000000000341e+02 1.749133758544921875e+02 2.681518554687500000e+00 0.000000000000000000e+00 2.823529481887817383e+00 3.266960449218750000e+03 3.793394565582275391e+00 4.000000000000000000e+00 1.000000000000000000e+00 2.965870666503906250e+02 5.925000000000000000e+01 5.025000000000000000e+01
0.000000000000000000e+00 2.563923076923076678e+02 1.444937591552734375e+02 2.585449218750000000e+00 0.000000000000000000e+00 1.823529362678527832e+00 3.281915039062500000e+03 3.826776981353759766e+00 4.000000000000000000e+00 1.000000000000000000e+00 2.472017059326171875e+02 6.025000000000000000e+01 5.025000000000000000e+01
1.000000000000000000e+00 2.337076923076922981e+02 1.255012893676757812e+02 2.660858154296875000e+00 0.000000000000000000e+00 1.647058844566345215e+00 3.323526367187500000e+03 3.857076168060302734e+00 4.000000000000000000e+00 1.000000000000000000e+00 2.428709869384765625e+02 6.125000000000000000e+01 5.025000000000000000e+01
0.000000000000000000e+00 2.296153846153846132e+02 1.200947265625000000e+02 2.698547363281250000e+00 0.000000000000000000e+00 1.823529362678527832e+00 3.344332031250000000e+03 3.877423048019409180e+00 4.000000000000000000e+00 1.000000000000000000e+00 2.400000305175781250e+02 6.175000000000000000e+01 5.025000000000000000e+01
1.000000000000000000e+00 2.206461538461538510e+02 1.171087036132812500e+02 2.799316406250000000e+00 0.000000000000000000e+00 2.000000000000000000e+00 3.365613525390625000e+03 3.899681091308593750e+00 4.000000000000000000e+00 1.000000000000000000e+00 2.223447875976562500e+02 6.225000000000000000e+01 5.025000000000000000e+01
1.000000000000000000e+00 2.155615384615384755e+02 1.149163360595703125e+02 2.921142578125000000e+00 0.000000000000000000e+00 1.470588207244873047e+00 3.387053466796875000e+03 3.917106628417968750e+00 8.000000000000000000e+00 1.000000000000000000e+00 1.524803771972656250e+02 6.275000000000000000e+01 5.025000000000000000e+01
0.000000000000000000e+00 2.147615384615384926e+02 1.074651412963867188e+02 3.042938232421875000e+00 0.000000000000000000e+00 1.529411792755126953e+00 3.408493408203125000e+03 3.926539897918701172e+00 4.000000000000000000e+00 1.000000000000000000e+00 1.872868499755859375e+02 6.325000000000000000e+01 5.025000000000000000e+01
1.000000000000000000e+00 2.080538461538461661e+02 1.029233093261718750e+02 3.164733886718750000e+00 0.000000000000000000e+00 1.411764740943908691e+00 3.429933349609375000e+03 3.942543029785156250e+00 3.000000000000000000e+00 1.000000000000000000e+00 1.219822235107421875e+02 6.375000000000000000e+01 5.025000000000000000e+01
0.000000000000000000e+00 2.074461538461538339e+02 9.990744781494140625e+01 3.267700195312500000e+00 0.000000000000000000e+00 2.411764621734619141e+00 3.434792236328125000e+03 3.943053483963012695e+00 3.000000000000000000e+00 1.000000000000000000e+00 9.936236572265625000e+01 6.425000000000000000e+01 5.025000000000000000e+01
0.000000000000000000e+00 2.047615384615384642e+02 9.998576354980468750e+01 3.370697021484375000e+00 0.000000000000000000e+00 2.529411792755126953e+00 3.439650878906250000e+03 3.932579994201660156e+00 3.000000000000000000e+00 1.000000000000000000e+00 1.502098846435546875e+02 6.475000000000000000e+01 5.025000000000000000e+01
0.000000000000000000e+00 2.050538461538462229e+02 9.943278503417968750e+01 3.473663330078125000e+00 0.000000000000000000e+00 1.294117689132690430e+00 3.444509521484375000e+03 3.908832788467407227e+00 4.000000000000000000e+00 1.000000000000000000e+00 1.470150146484375000e+02 6.525000000000000000e+01 5.025000000000000000e+01
0.000000000000000000e+00 2.112999999999999261e+02 1.027985763549804688e+02 3.537017822265625000e+00 0.000000000000000000e+00 1.823529362678527832e+00 3.440634521484375000e+03 3.877827882766723633e+00 4.000000000000000000e+00 1.000000000000000000e+00 2.188484954833984375e+02 6.575000000000000000e+01 5.025000000000000000e+01
1.000000000000000000e+00 2.133307692307692207e+02 1.217122116088867188e+02 3.481567382812500000e+00 0.000000000000000000e+00 1.588235259056091309e+00 3.410558593750000000e+03 3.837792158126831055e+00 4.000000000000000000e+00 1.000000000000000000e+00 2.219410247802734375e+02 6.625000000000000000e+01 5.025000000000000000e+01
0.000000000000000000e+00 2.274615384615384244e+02 1.414566345214843750e+02 3.249877929687500000e+00 0.000000000000000000e+00 1.647058844566345215e+00 3.310841064453125000e+03 3.761889457702636719e+00 4.000000000000000000e+00 1.000000000000000000e+00 3.264411315917968750e+02 6.775000000000000000e+01 5.025000000000000000e+01
5.300000000000000000e+01 5.778230769230769965e+02 3.079690856933593750e+02 4.613647460937500000e+00 0.000000000000000000e+00 2.529411792755126953e+00 3.228415283203125000e+03 3.877708196640014648e+00 8.000000000000000000e+00 4.000000000000000000e+00 1.297904663085937500e+02 3.475000000000000000e+01 5.075000000000000000e+01
1.000000000000000000e+00 4.393153846153844597e+02 2.628547363281250000e+02 4.360900878906250000e+00 0.000000000000000000e+00 2.470588207244873047e+00 3.426475585937500000e+03 3.905870199203491211e+00 4.000000000000000000e+00 1.000000000000000000e+00 1.547167205810546875e+02 4.425000000000000000e+01 5.075000000000000000e+01
3.000000000000000000e+00 3.839461538461537202e+02 2.331894531250000000e+02 4.790618896484375000e+00 0.000000000000000000e+00 2.235294103622436523e+00 3.592280517578125000e+03 4.054538726806640625e+00 8.000000000000000000e+00 1.000000000000000000e+00 5.248455047607421875e+01 4.675000000000000000e+01 5.075000000000000000e+01
1.000000000000000000e+00 3.807999999999998977e+02 1.899227294921875000e+02 5.004516601562500000e+00 0.000000000000000000e+00 1.647058844566345215e+00 3.685472900390625000e+03 4.024396419525146484e+00 4.000000000000000000e+00 1.000000000000000000e+00 8.171752929687500000e+01 4.875000000000000000e+01 5.075000000000000000e+01
2.000000000000000000e+00 3.739999999999999432e+02 1.744025421142578125e+02 4.873168945312500000e+00 0.000000000000000000e+00 2.411764621734619141e+00 3.671283203125000000e+03 4.032954216003417969e+00 4.000000000000000000e+00 1.000000000000000000e+00 2.736074256896972656e+01 4.975000000000000000e+01 5.075000000000000000e+01
1.000000000000000000e+00 3.652230769230768033e+02 1.634579010009765625e+02 4.807495117187500000e+00 0.000000000000000000e+00 1.705882310867309570e+00 3.664188476562500000e+03 4.039321422576904297e+00 3.000000000000000000e+00 1.000000000000000000e+00 2.149997329711914062e+01 5.025000000000000000e+01 5.075000000000000000e+01
4.000000000000000000e+00 3.486230769230770079e+02 1.573022308349609375e+02 4.726715087890625000e+00 0.000000000000000000e+00 3.117647171020507812e+00 3.652276123046875000e+03 4.040461540222167969e+00 4.000000000000000000e+00 1.000000000000000000e+00 2.031730461120605469e+01 5.075000000000000000e+01 5.075000000000000000e+01
0.000000000000000000e+00 3.308230769230768260e+02 1.570689392089843750e+02 4.600524902343750000e+00 0.000000000000000000e+00 1.588235259056091309e+00 3.625911621093750000e+03 4.032398223876953125e+00 8.000000000000000000e+00 1.000000000000000000e+00 2.282956314086914062e+01 5.125000000000000000e+01 5.075000000000000000e+01
0.000000000000000000e+00 3.218615384615386006e+02 1.530822906494140625e+02 4.348205566406250000e+00 0.000000000000000000e+00 2.470588207244873047e+00 3.573182617187500000e+03 4.009870529174804688e+00 4.000000000000000000e+00 1.000000000000000000e+00 4.698789978027343750e+01 5.225000000000000000e+01 5.075000000000000000e+01
0.000000000000000000e+00 3.236615384615384983e+02 1.486587677001953125e+02 4.206298828125000000e+00 0.000000000000000000e+00 2.411764621734619141e+00 3.541287841796875000e+03 4.010563850402832031e+00 4.000000000000000000e+00 1.000000000000000000e+00 1.165039901733398438e+02 5.275000000000000000e+01 5.075000000000000000e+01
1.000000000000000000e+00 3.214307692307692150e+02 1.480188751220703125e+02 4.048675537109375000e+00 0.000000000000000000e+00 3.058823585510253906e+00 3.503862548828125000e+03 3.995697498321533203e+00 4.000000000000000000e+00 1.000000000000000000e+00 8.377025604248046875e+01 5.325000000000000000e+01 5.075000000000000000e+01
1.000000000000000000e+00 3.250846153846152902e+02 1.510960540771484375e+02 3.891052246093750000e+00 0.000000000000000000e+00 2.411764621734619141e+00 3.466437255859375000e+03 3.970219373703002930e+00 4.000000000000000000e+00 1.000000000000000000e+00 1.543089294433593750e+02 5.375000000000000000e+01 5.075000000000000000e+01
1.000000000000000000e+00 3.246923076923077360e+02 1.603482360839843750e+02 3.733398437500000000e+00 0.000000000000000000e+00 2.705882310867309570e+00 3.429011718750000000e+03 3.945507764816284180e+00 4.000000000000000000e+00 1.000000000000000000e+00 1.705956878662109375e+02 5.425000000000000000e+01 5.075000000000000000e+01
0.000000000000000000e+00 3.214769230769229011e+02 1.752995300292968750e+02 3.553131103515625000e+00 0.000000000000000000e+00 2.000000000000000000e+00 3.385207519531250000e+03 3.929499149322509766e+00 4.000000000000000000e+00 1.000000000000000000e+00 1.085486373901367188e+02 5.475000000000000000e+01 5.075000000000000000e+01
1.000000000000000000e+00 2.965384615384613767e+02 1.882832946777343750e+02 2.272186279296875000e+00 0.000000000000000000e+00 2.411764621734619141e+00 3.149042480468750000e+03 3.749449729919433594e+00 4.000000000000000000e+00 1.000000000000000000e+00 2.730705566406250000e+02 5.925000000000000000e+01 5.075000000000000000e+01
1.000000000000000000e+00 2.885076923076924231e+02 1.765476226806640625e+02 2.211669921875000000e+00 0.000000000000000000e+00 2.000000000000000000e+00 3.157274414062500000e+03 3.742711067199707031e+00 4.000000000000000000e+00 1.000000000000000000e+00 3.278412170410156250e+02 5.975000000000000000e+01 5.075000000000000000e+01
1.000000000000000000e+00 2.472615384615384642e+02 1.418993377685546875e+02 2.386413574218750000e+00 0.000000000000000000e+00 2.117647171020507812e+00 3.253976318359375000e+03 3.817735910415649414e+00 4.000000000000000000e+00 1.000000000000000000e+00 2.501314086914062500e+02 6.175000000000000000e+01 5.075000000000000000e+01
1.000000000000000000e+00 2.389923076923076053e+02 1.341341552734375000e+02 2.495910644531250000e+00 0.000000000000000000e+00 2.588235378265380859e+00 3.278243896484375000e+03 3.831554651260375977e+00 4.000000000000000000e+00 1.000000000000000000e+00 2.500126647949218750e+02 6.225000000000000000e+01 5.075000000000000000e+01
1.000000000000000000e+00 2.362538461538462968e+02 1.270338973999023438e+02 2.622344970703125000e+00 0.000000000000000000e+00 1.529411792755126953e+00 3.301782714843750000e+03 3.839471817016601562e+00 4.000000000000000000e+00 1.000000000000000000e+00 2.446752471923828125e+02 6.275000000000000000e+01 5.075000000000000000e+01
0.000000000000000000e+00 2.353384615384615586e+02 1.188993301391601562e+02 2.748779296875000000e+00 0.000000000000000000e+00 2.000000000000000000e+00 3.325321533203125000e+03 3.844389915466308594e+00 4.000000000000000000e+00 1.000000000000000000e+00 2.274864044189453125e+02 6.325000000000000000e+01 5.075000000000000000e+01
0.000000000000000000e+00 2.331307692307692037e+02 1.133872528076171875e+02 2.875213623046875000e+00 0.000000000000000000e+00 2.176470518112182617e+00 3.348860595703125000e+03 3.854516029357910156e+00 4.000000000000000000e+00 1.000000000000000000e+00 2.172576751708984375e+02 6.375000000000000000e+01 5.075000000000000000e+01
0.000000000000000000e+00 2.273923076923077247e+02 1.075881958007812500e+02 2.974121093750000000e+00 0.000000000000000000e+00 1.823529362678527832e+00 3.355265869140625000e+03 3.881382226943969727e+00 4.000000000000000000e+00 1.000000000000000000e+00 1.668938140869140625e+02 6.425000000000000000e+01 5.075000000000000000e+01
1.000000000000000000e+00 2.233538461538462059e+02 1.097153167724609375e+02 3.073059082031250000e+00 0.000000000000000000e+00 2.470588207244873047e+00 3.361671386718750000e+03 3.882950782775878906e+00 4.000000000000000000e+00 1.000000000000000000e+00 1.183571929931640625e+02 6.475000000000000000e+01 5.075000000000000000e+01
0.000000000000000000e+00 2.241615384615384130e+02 1.133581924438476562e+02 3.171966552734375000e+00 0.000000000000000000e+00 2.529411792755126953e+00 3.368076904296875000e+03 3.849109888076782227e+00 3.000000000000000000e+00 1.000000000000000000e+00 1.523404998779296875e+02 6.525000000000000000e+01 5.075000000000000000e+01
1.000000000000000000e+00 2.331769230769230603e+02 1.498717041015625000e+02 3.079406738281250000e+00 0.000000000000000000e+00 2.705882310867309570e+00 3.284709228515625000e+03 3.742923021316528320e+00 4.000000000000000000e+00 1.000000000000000000e+00 3.148465270996093750e+02 6.725000000000000000e+01 5.075000000000000000e+01
1.000000000000000000e+00 2.350461538461538282e+02 1.480690307617187500e+02 2.970489501953125000e+00 0.000000000000000000e+00 2.235294103622436523e+00 3.248827148437500000e+03 3.736511945724487305e+00 4.000000000000000000e+00 1.000000000000000000e+00 2.918018188476562500e+02 6.775000000000000000e+01 5.075000000000000000e+01
5.400000000000000000e+01 4.818230769230771102e+02 2.758841247558593750e+02 4.092468261718750000e+00 0.000000000000000000e+00 1.823529362678527832e+00 3.235243652343750000e+03 3.874080419540405273e+00 8.000000000000000000e+00 4.000000000000000000e+00 1.016230392456054688e+02 4.175000000000000000e+01 5.125000000000000000e+01
4.000000000000000000e+00 4.700384615384618314e+02 2.804359130859375000e+02 3.908172607421875000e+00 0.000000000000000000e+00 2.000000000000000000e+00 3.241842041015625000e+03 3.863922834396362305e+00 4.000000000000000000e+00 1.000000000000000000e+00 1.534979705810546875e+02 4.275000000000000000e+01 5.125000000000000000e+01
2.000000000000000000e+00 4.160076923076924800e+02 2.219991760253906250e+02 4.596862792968750000e+00 0.000000000000000000e+00 2.058823585510253906e+00 3.534255126953125000e+03 4.000626087188720703e+00 4.000000000000000000e+00 1.000000000000000000e+00 9.149224090576171875e+01 4.775000000000000000e+01 5.125000000000000000e+01
0.000000000000000000e+00 3.888538461538461206e+02 1.885435180664062500e+02 4.502868652343750000e+00 0.000000000000000000e+00 2.764705896377563477e+00 3.563605957031250000e+03 3.946425437927246094e+00 4.000000000000000000e+00 1.000000000000000000e+00 6.995143127441406250e+01 5.075000000000000000e+01 5.125000000000000000e+01
1.000000000000000000e+00 3.748615384615385437e+02 1.920934448242187500e+02 4.373474121093750000e+00 0.000000000000000000e+00 1.588235259056091309e+00 3.535698974609375000e+03 3.944031715393066406e+00 4.000000000000000000e+00 1.000000000000000000e+00 4.001633834838867188e+01 5.125000000000000000e+01 5.125000000000000000e+01
7.000000000000000000e+00 3.743461538461538680e+02 1.933752899169921875e+02 4.244079589843750000e+00 0.000000000000000000e+00 2.235294103622436523e+00 3.507791992187500000e+03 3.943083763122558594e+00 8.000000000000000000e+00 1.000000000000000000e+00 5.616159439086914062e+01 5.175000000000000000e+01 5.125000000000000000e+01
1.000000000000000000e+00 3.684461538461540613e+02 1.852004699707031250e+02 4.114715576171875000e+00 0.000000000000000000e+00 2.117647171020507812e+00 3.479885009765625000e+03 3.946784019470214844e+00 4.000000000000000000e+00 1.000000000000000000e+00 8.083637237548828125e+01 5.225000000000000000e+01 5.125000000000000000e+01
1.000000000000000000e+00 3.659307692307692150e+02 1.757850646972656250e+02 3.952270507812500000e+00 0.000000000000000000e+00 2.823529481887817383e+00 3.442799560546875000e+03 3.952220916748046875e+00 4.000000000000000000e+00 1.000000000000000000e+00 5.712685012817382812e+01 5.275000000000000000e+01 5.125000000000000000e+01
0.000000000000000000e+00 3.620769230769229239e+02 1.761495666503906250e+02 3.561218261718750000e+00 0.000000000000000000e+00 2.470588207244873047e+00 3.350272216796875000e+03 3.938497304916381836e+00 4.000000000000000000e+00 1.000000000000000000e+00 6.690753936767578125e+01 5.375000000000000000e+01 5.125000000000000000e+01
1.000000000000000000e+00 3.491538461538459615e+02 1.886781311035156250e+02 3.365722656250000000e+00 0.000000000000000000e+00 1.882352948188781738e+00 3.304008544921875000e+03 3.913778066635131836e+00 4.000000000000000000e+00 1.000000000000000000e+00 1.370745086669921875e+02 5.425000000000000000e+01 5.125000000000000000e+01
1.000000000000000000e+00 3.481384615384613426e+02 2.022140045166015625e+02 3.153137207031250000e+00 0.000000000000000000e+00 3.117647171020507812e+00 3.254882324218750000e+03 3.888708353042602539e+00 4.000000000000000000e+00 1.000000000000000000e+00 2.250067138671875000e+02 5.475000000000000000e+01 5.125000000000000000e+01
0.000000000000000000e+00 3.480769230769232649e+02 2.131706848144531250e+02 2.716644287109375000e+00 0.000000000000000000e+00 1.588235259056091309e+00 3.154721679687500000e+03 3.855601549148559570e+00 4.000000000000000000e+00 1.000000000000000000e+00 2.066237640380859375e+02 5.575000000000000000e+01 5.125000000000000000e+01
1.000000000000000000e+00 3.419538461538459728e+02 2.187734527587890625e+02 2.498382568359375000e+00 0.000000000000000000e+00 2.294117689132690430e+00 3.104641357421875000e+03 3.834329128265380859e+00 4.000000000000000000e+00 1.000000000000000000e+00 2.138556976318359375e+02 5.625000000000000000e+01 5.125000000000000000e+01
1.000000000000000000e+00 3.429769230769230717e+02 2.238705139160156250e+02 2.358032226562500000e+00 0.000000000000000000e+00 2.588235378265380859e+00 3.077440673828125000e+03 3.792679548263549805e+00 4.000000000000000000e+00 1.000000000000000000e+00 2.651117858886718750e+02 5.675000000000000000e+01 5.125000000000000000e+01
1.000000000000000000e+00 3.107538461538462116e+02 1.967709808349609375e+02 1.876770019531250000e+00 0.000000000000000000e+00 2.941176414489746094e+00 3.032301757812500000e+03 3.736714124679565430e+00 3.000000000000000000e+00 1.000000000000000000e+00 2.527300109863281250e+02 5.925000000000000000e+01 5.125000000000000000e+01
5.000000000000000000e+00 2.685153846153845620e+02 1.546065673828125000e+02 2.126190185546875000e+00 0.000000000000000000e+00 2.352941274642944336e+00 3.171422363281250000e+03 3.765720367431640625e+00 4.000000000000000000e+00 1.000000000000000000e+00 2.628200073242187500e+02 6.175000000000000000e+01 5.125000000000000000e+01
1.600000000000000000e+01 2.641153846153848122e+02 1.386898651123046875e+02 2.245788574218750000e+00 0.000000000000000000e+00 2.176470518112182617e+00 3.199400878906250000e+03 3.792648077011108398e+00 4.000000000000000000e+00 1.000000000000000000e+00 2.250380096435546875e+02 6.225000000000000000e+01 5.125000000000000000e+01
1.000000000000000000e+00 2.599384615384615245e+02 1.301240539550781250e+02 2.375457763671875000e+00 0.000000000000000000e+00 2.705882310867309570e+00 3.225339111328125000e+03 3.805837631225585938e+00 4.000000000000000000e+00 1.000000000000000000e+00 2.250364532470703125e+02 6.275000000000000000e+01 5.125000000000000000e+01
1.000000000000000000e+00 2.581307692307692605e+02 1.245165405273437500e+02 2.505126953125000000e+00 0.000000000000000000e+00 2.411764621734619141e+00 3.251277099609375000e+03 3.810354471206665039e+00 4.000000000000000000e+00 1.000000000000000000e+00 2.343245391845703125e+02 6.325000000000000000e+01 5.125000000000000000e+01
1.000000000000000000e+00 2.521846153846152845e+02 1.223628005981445312e+02 2.634796142578125000e+00 0.000000000000000000e+00 1.882352948188781738e+00 3.277215332031250000e+03 3.825867414474487305e+00 4.000000000000000000e+00 1.000000000000000000e+00 2.254527282714843750e+02 6.375000000000000000e+01 5.125000000000000000e+01
0.000000000000000000e+00 2.489923076923077758e+02 1.230557937622070312e+02 2.704101562500000000e+00 0.000000000000000000e+00 1.705882310867309570e+00 3.281136718750000000e+03 3.844585657119750977e+00 3.000000000000000000e+00 1.000000000000000000e+00 1.311502075195312500e+02 6.425000000000000000e+01 5.125000000000000000e+01
0.000000000000000000e+00 2.455538461538461092e+02 1.267073898315429688e+02 2.773406982421875000e+00 0.000000000000000000e+00 1.588235259056091309e+00 3.285057861328125000e+03 3.833415985107421875e+00 3.000000000000000000e+00 1.000000000000000000e+00 2.035362548828125000e+02 6.475000000000000000e+01 5.125000000000000000e+01
1.000000000000000000e+00 2.440615384615384471e+02 1.326032867431640625e+02 2.842681884765625000e+00 0.000000000000000000e+00 2.176470518112182617e+00 3.288979248046875000e+03 3.800926208496093750e+00 4.000000000000000000e+00 1.000000000000000000e+00 2.034880523681640625e+02 6.525000000000000000e+01 5.125000000000000000e+01
0.000000000000000000e+00 2.433846153846153868e+02 1.492809295654296875e+02 2.728332519531250000e+00 0.000000000000000000e+00 2.235294103622436523e+00 3.228287597656250000e+03 3.729594230651855469e+00 4.000000000000000000e+00 1.000000000000000000e+00 2.859591064453125000e+02 6.675000000000000000e+01 5.125000000000000000e+01
1.000000000000000000e+00 2.445230769230768999e+02 1.520542144775390625e+02 2.654418945312500000e+00 0.000000000000000000e+00 2.647058725357055664e+00 3.200006591796875000e+03 3.712891340255737305e+00 4.000000000000000000e+00 1.000000000000000000e+00 2.509529266357421875e+02 6.725000000000000000e+01 5.125000000000000000e+01
9.000000000000000000e+00 5.944769230769231854e+02 3.146720886230468750e+02 4.198242187500000000e+00 0.000000000000000000e+00 1.294117689132690430e+00 3.091671386718750000e+03 3.810234546661376953e+00 5.000000000000000000e+00 1.000000000000000000e+00 1.912758331298828125e+02 3.375000000000000000e+01 5.175000000000000000e+01
6.000000000000000000e+00 5.346846153846154266e+02 3.098305969238281250e+02 3.980346679687500000e+00 0.000000000000000000e+00 1.647058844566345215e+00 3.129768066406250000e+03 3.799922227859497070e+00 4.000000000000000000e+00 1.000000000000000000e+00 1.551537628173828125e+02 3.975000000000000000e+01 5.175000000000000000e+01
7.000000000000000000e+00 4.790999999999998522e+02 2.597803955078125000e+02 3.856719970703125000e+00 0.000000000000000000e+00 1.411764740943908691e+00 3.293012451171875000e+03 3.826591730117797852e+00 4.000000000000000000e+00 1.000000000000000000e+00 1.814107055664062500e+02 4.575000000000000000e+01 5.175000000000000000e+01
1.200000000000000000e+01 4.622461538461539590e+02 2.589263305664062500e+02 3.987792968750000000e+00 0.000000000000000000e+00 2.058823585510253906e+00 3.329327148437500000e+03 3.930788516998291016e+00 4.000000000000000000e+00 1.000000000000000000e+00 1.475021839141845703e+01 4.625000000000000000e+01 5.175000000000000000e+01
1.000000000000000000e+00 4.356999999999998181e+02 2.192322082519531250e+02 4.374511718750000000e+00 0.000000000000000000e+00 2.176470518112182617e+00 3.485393310546875000e+03 3.914246797561645508e+00 3.000000000000000000e+00 1.000000000000000000e+00 6.248440170288085938e+01 4.975000000000000000e+01 5.175000000000000000e+01
1.000000000000000000e+00 4.286230769230770079e+02 2.100692596435546875e+02 4.146423339843750000e+00 0.000000000000000000e+00 2.176470518112182617e+00 3.445486328125000000e+03 3.882787942886352539e+00 4.000000000000000000e+00 1.000000000000000000e+00 7.762790679931640625e+01 5.125000000000000000e+01 5.175000000000000000e+01
1.000000000000000000e+00 4.269153846153846530e+02 2.118474731445312500e+02 4.013824462890625000e+00 0.000000000000000000e+00 2.000000000000000000e+00 3.416036621093750000e+03 3.878165960311889648e+00 4.000000000000000000e+00 1.000000000000000000e+00 1.274181442260742188e+02 5.175000000000000000e+01 5.175000000000000000e+01
1.000000000000000000e+00 4.253846153846151878e+02 2.123589935302734375e+02 3.881225585937500000e+00 0.000000000000000000e+00 1.941176414489746094e+00 3.386587158203125000e+03 3.873747587203979492e+00 4.000000000000000000e+00 1.000000000000000000e+00 9.456037139892578125e+01 5.225000000000000000e+01 5.175000000000000000e+01
5.000000000000000000e+00 3.773307692307689649e+02 2.136285400390625000e+02 2.753173828125000000e+00 0.000000000000000000e+00 1.941176414489746094e+00 3.124557128906250000e+03 3.850815773010253906e+00 4.000000000000000000e+00 1.000000000000000000e+00 1.038152084350585938e+02 5.475000000000000000e+01 5.175000000000000000e+01
1.000000000000000000e+01 3.380846153846154607e+02 2.463118591308593750e+02 1.630065917968750000e+00 0.000000000000000000e+00 1.352941155433654785e+00 2.892178955078125000e+03 3.631968021392822266e+00 4.000000000000000000e+00 1.000000000000000000e+00 4.753419494628906250e+02 5.775000000000000000e+01 5.175000000000000000e+01
1.000000000000000000e+00 3.105461538461537998e+02 1.948984375000000000e+02 1.505187988281250000e+00 0.000000000000000000e+00 1.352941155433654785e+00 2.963635986328125000e+03 3.648735284805297852e+00 3.000000000000000000e+00 1.000000000000000000e+00 3.481019592285156250e+02 6.025000000000000000e+01 5.175000000000000000e+01
0.000000000000000000e+00 2.669461538461538339e+02 1.432747497558593750e+02 2.434051513671875000e+00 0.000000000000000000e+00 1.823529362678527832e+00 3.207007324218750000e+03 3.790137052536010742e+00 4.000000000000000000e+00 1.000000000000000000e+00 1.445031433105468750e+02 6.425000000000000000e+01 5.175000000000000000e+01
0.000000000000000000e+00 2.653076923076921503e+02 1.485136566162109375e+02 2.473724365234375000e+00 0.000000000000000000e+00 2.588235378265380859e+00 3.208444335937500000e+03 3.771842241287231445e+00 4.000000000000000000e+00 1.000000000000000000e+00 1.779345245361328125e+02 6.475000000000000000e+01 5.175000000000000000e+01
0.000000000000000000e+00 2.596230769230770079e+02 1.468577270507812500e+02 2.422485351562500000e+00 0.000000000000000000e+00 1.764705896377563477e+00 3.174168701171875000e+03 3.701472520828247070e+00 4.000000000000000000e+00 1.000000000000000000e+00 2.410747680664062500e+02 6.625000000000000000e+01 5.175000000000000000e+01
1.200000000000000000e+01 5.375230769230770420e+02 2.787477416992187500e+02 3.164611816406250000e+00 0.000000000000000000e+00 3.117647171020507812e+00 3.017778320312500000e+03 3.771861076354980469e+00 4.000000000000000000e+00 1.000000000000000000e+00 1.506119384765625000e+02 4.225000000000000000e+01 5.225000000000000000e+01
8.000000000000000000e+00 5.049999999999996021e+02 2.869856262207031250e+02 3.150939941406250000e+00 0.000000000000000000e+00 3.058823585510253906e+00 3.076416503906250000e+03 3.742344617843627930e+00 4.000000000000000000e+00 1.000000000000000000e+00 2.115552673339843750e+02 4.425000000000000000e+01 5.225000000000000000e+01
6.000000000000000000e+00 5.006615384615385551e+02 2.694172058105468750e+02 3.354949951171875000e+00 0.000000000000000000e+00 2.764705896377563477e+00 3.142025878906250000e+03 3.740687131881713867e+00 8.000000000000000000e+00 1.000000000000000000e+00 1.876365203857421875e+02 4.525000000000000000e+01 5.225000000000000000e+01
1.000000000000000000e+00 5.127538461538463253e+02 2.588853454589843750e+02 3.783020019531250000e+00 0.000000000000000000e+00 1.941176414489746094e+00 3.252322753906250000e+03 3.834776401519775391e+00 4.000000000000000000e+00 1.000000000000000000e+00 1.511422729492187500e+02 4.675000000000000000e+01 5.225000000000000000e+01
2.000000000000000000e+00 4.722846153846152220e+02 2.249619140625000000e+02 4.104583740234375000e+00 0.000000000000000000e+00 2.235294103622436523e+00 3.393342773437500000e+03 3.852850675582885742e+00 4.000000000000000000e+00 1.000000000000000000e+00 1.164669799804687500e+02 5.025000000000000000e+01 5.225000000000000000e+01
2.500000000000000000e+01 3.612538461538462116e+02 3.141631469726562500e+02 1.293884277343750000e+00 0.000000000000000000e+00 2.941176593303680420e-01 2.780576660156250000e+03 3.538734912872314453e+00 1.300000000000000000e+01 3.000000000000000000e+00 5.332190551757812500e+02 5.725000000000000000e+01 5.225000000000000000e+01
3.000000000000000000e+01 3.553076923076922640e+02 2.942185974121093750e+02 1.182800292968750000e+00 0.000000000000000000e+00 0.000000000000000000e+00 2.761318603515625000e+03 3.492187738418579102e+00 1.300000000000000000e+01 3.000000000000000000e+00 5.518046264648437500e+02 5.775000000000000000e+01 5.225000000000000000e+01
1.000000000000000000e+00 3.232153846153846075e+02 1.976983947753906250e+02 1.152435302734375000e+00 0.000000000000000000e+00 1.529411792755126953e+00 2.858145507812500000e+03 3.594703674316406250e+00 3.000000000000000000e+00 1.000000000000000000e+00 3.663503112792968750e+02 6.025000000000000000e+01 5.225000000000000000e+01
1.000000000000000000e+00 3.142076923076922412e+02 1.876754150390625000e+02 1.745574951171875000e+00 0.000000000000000000e+00 3.176470518112182617e+00 3.041714843750000000e+03 3.702084064483642578e+00 3.000000000000000000e+00 1.000000000000000000e+00 2.298098449707031250e+02 6.225000000000000000e+01 5.225000000000000000e+01
1.300000000000000000e+01 6.089307692307694424e+02 3.395585021972656250e+02 3.760589599609375000e+00 0.000000000000000000e+00 2.941176593303680420e-01 2.967521972656250000e+03 3.708701610565185547e+00 5.000000000000000000e+00 1.000000000000000000e+00 1.811625671386718750e+02 3.425000000000000000e+01 5.275000000000000000e+01
6.000000000000000000e+00 6.482846153846155630e+02 3.522937316894531250e+02 3.743713378906250000e+00 0.000000000000000000e+00 2.176470518112182617e+00 2.984679687500000000e+03 3.637423515319824219e+00 8.000000000000000000e+00 1.000000000000000000e+00 2.340020904541015625e+02 3.625000000000000000e+01 5.275000000000000000e+01
5.000000000000000000e+00 5.476384615384615699e+02 3.100572204589843750e+02 3.467041015625000000e+00 0.000000000000000000e+00 2.117647171020507812e+00 2.989237060546875000e+03 3.723508358001708984e+00 8.000000000000000000e+00 1.000000000000000000e+00 1.167706604003906250e+02 3.975000000000000000e+01 5.275000000000000000e+01
5.000000000000000000e+01 5.300615384615385892e+02 2.708152770996093750e+02 3.173431396484375000e+00 0.000000000000000000e+00 0.000000000000000000e+00 3.081952392578125000e+03 3.727548599243164062e+00 5.000000000000000000e+00 4.000000000000000000e+00 2.309318084716796875e+02 4.575000000000000000e+01 5.275000000000000000e+01
1.000000000000000000e+00 5.267692307692307168e+02 2.635574951171875000e+02 3.418609619140625000e+00 0.000000000000000000e+00 5.882353186607360840e-01 3.147960205078125000e+03 3.755748510360717773e+00 5.000000000000000000e+00 1.000000000000000000e+00 2.679737854003906250e+02 4.675000000000000000e+01 5.275000000000000000e+01
1.000000000000000000e+00 5.047846153846154493e+02 2.486520996093750000e+02 3.752349853515625000e+00 0.000000000000000000e+00 2.470588207244873047e+00 3.286056640625000000e+03 3.804636478424072266e+00 4.000000000000000000e+00 1.000000000000000000e+00 1.045621566772460938e+02 5.025000000000000000e+01 5.275000000000000000e+01
4.900000000000000000e+01 4.193076923076922640e+02 2.991259155273437500e+02 1.095092773437500000e+00 0.000000000000000000e+00 0.000000000000000000e+00 2.705930419921875000e+03 3.548114061355590820e+00 1.300000000000000000e+01 4.000000000000000000e+00 4.092511596679687500e+02 5.675000000000000000e+01 5.275000000000000000e+01
2.300000000000000000e+01 3.978615384615383164e+02 3.139869384765625000e+02 9.949340820312500000e-01 0.000000000000000000e+00 0.000000000000000000e+00 2.688031738281250000e+03 3.218231439590454102e+00 1.300000000000000000e+01 3.000000000000000000e+00 5.444112548828125000e+02 5.725000000000000000e+01 5.275000000000000000e+01
4.300000000000000000e+01 3.906538461538462457e+02 3.025069580078125000e+02 8.947448730468750000e-01 0.000000000000000000e+00 0.000000000000000000e+00 2.670133300781250000e+03 2.282361030578613281e+00 1.300000000000000000e+01 3.000000000000000000e+00 6.894561767578125000e+02 5.775000000000000000e+01 5.275000000000000000e+01
5.000000000000000000e+00 3.615999999999999659e+02 2.312882690429687500e+02 8.348083496093750000e-01 0.000000000000000000e+00 1.470588207244873047e+00 2.687491455078125000e+03 3.491863012313842773e+00 1.300000000000000000e+01 1.000000000000000000e+00 3.505925598144531250e+02 5.875000000000000000e+01 5.275000000000000000e+01
0.000000000000000000e+00 3.416999999999998749e+02 2.047157592773437500e+02 1.099731445312500000e+00 0.000000000000000000e+00 1.705882310867309570e+00 2.824639892578125000e+03 3.594868183135986328e+00 3.000000000000000000e+00 1.000000000000000000e+00 3.003975219726562500e+02 6.075000000000000000e+01 5.275000000000000000e+01
3.000000000000000000e+00 3.403999999999999773e+02 2.075628662109375000e+02 1.256103515625000000e+00 0.000000000000000000e+00 2.588235378265380859e+00 2.875029541015625000e+03 3.640559196472167969e+00 3.000000000000000000e+00 1.000000000000000000e+00 2.595707092285156250e+02 6.125000000000000000e+01 5.275000000000000000e+01
0.000000000000000000e+00 3.317769230769230830e+02 1.827651062011718750e+02 1.549591064453125000e+00 0.000000000000000000e+00 1.764705896377563477e+00 2.961476074218750000e+03 3.660996675491333008e+00 3.000000000000000000e+00 1.000000000000000000e+00 2.140322570800781250e+02 6.225000000000000000e+01 5.275000000000000000e+01
5.600000000000000000e+01 6.125692307692308987e+02 3.536684875488281250e+02 3.649810791015625000e+00 0.000000000000000000e+00 5.294117927551269531e-01 2.920185791015625000e+03 3.668327808380126953e+00 5.000000000000000000e+00 4.000000000000000000e+00 1.877492675781250000e+02 3.325000000000000000e+01 5.325000000000000000e+01
6.600000000000000000e+01 6.370692307692307850e+02 3.688994140625000000e+02 3.535003662109375000e+00 0.000000000000000000e+00 0.000000000000000000e+00 2.915649658203125000e+03 3.661386728286743164e+00 5.000000000000000000e+00 4.000000000000000000e+00 1.859166107177734375e+02 3.475000000000000000e+01 5.325000000000000000e+01
3.100000000000000000e+01 6.627307692307695106e+02 3.614760742187500000e+02 3.536346435546875000e+00 0.000000000000000000e+00 1.117647051811218262e+00 2.920559082031250000e+03 3.648758411407470703e+00 5.000000000000000000e+00 3.000000000000000000e+00 2.160863952636718750e+02 3.525000000000000000e+01 5.325000000000000000e+01
1.000000000000000000e+01 6.569076923076925141e+02 3.462450256347656250e+02 3.597473144531250000e+00 0.000000000000000000e+00 1.823529362678527832e+00 2.955261474609375000e+03 3.633157253265380859e+00 8.000000000000000000e+00 1.000000000000000000e+00 2.467086181640625000e+02 3.725000000000000000e+01 5.325000000000000000e+01
5.000000000000000000e+00 6.009999999999998863e+02 2.934063110351562500e+02 3.113372802734375000e+00 0.000000000000000000e+00 2.176470518112182617e+00 2.933345947265625000e+03 3.693484544754028320e+00 5.000000000000000000e+00 1.000000000000000000e+00 1.065011291503906250e+02 4.175000000000000000e+01 5.325000000000000000e+01
1.100000000000000000e+01 5.533769230769231626e+02 2.788102416992187500e+02 2.727874755859375000e+00 0.000000000000000000e+00 2.176470518112182617e+00 2.943043457031250000e+03 3.673732995986938477e+00 8.000000000000000000e+00 1.000000000000000000e+00 2.341117248535156250e+02 4.475000000000000000e+01 5.325000000000000000e+01
4.100000000000000000e+01 5.463076923076921503e+02 2.746150207519531250e+02 2.861480712890625000e+00 0.000000000000000000e+00 8.235294222831726074e-01 2.991214111328125000e+03 3.695677042007446289e+00 5.000000000000000000e+00 3.000000000000000000e+00 2.465385131835937500e+02 4.575000000000000000e+01 5.325000000000000000e+01
8.000000000000000000e+00 5.470000000000000000e+02 2.678033752441406250e+02 3.044219970703125000e+00 0.000000000000000000e+00 2.352941185235977173e-01 3.046741455078125000e+03 3.679567575454711914e+00 5.000000000000000000e+00 1.000000000000000000e+00 2.658196105957031250e+02 4.675000000000000000e+01 5.325000000000000000e+01
1.700000000000000000e+01 5.046076923076922185e+02 2.602526245117187500e+02 3.189910888671875000e+00 0.000000000000000000e+00 5.882353186607360840e-01 3.103159912109375000e+03 3.719974994659423828e+00 8.000000000000000000e+00 1.000000000000000000e+00 2.432266235351562500e+02 4.775000000000000000e+01 5.325000000000000000e+01
1.000000000000000000e+01 4.721538461538460751e+02 2.590119323730468750e+02 3.260101318359375000e+00 0.000000000000000000e+00 1.411764740943908691e+00 3.131432861328125000e+03 3.752725362777709961e+00 4.000000000000000000e+00 1.000000000000000000e+00 1.636934204101562500e+02 4.825000000000000000e+01 5.325000000000000000e+01
6.000000000000000000e+01 4.743307692307692491e+02 2.558286590576171875e+02 3.349273681640625000e+00 0.000000000000000000e+00 5.294117927551269531e-01 3.168436523437500000e+03 3.758138895034790039e+00 5.000000000000000000e+00 4.000000000000000000e+00 1.837728576660156250e+02 4.975000000000000000e+01 5.325000000000000000e+01
8.000000000000000000e+00 4.959000000000000341e+02 2.907587280273437500e+02 1.459747314453125000e+00 0.000000000000000000e+00 1.176470592617988586e-01 2.746314453125000000e+03 3.619144439697265625e+00 4.000000000000000000e+00 1.000000000000000000e+00 3.079637756347656250e+02 5.525000000000000000e+01 5.325000000000000000e+01
4.100000000000000000e+01 4.885615384615384187e+02 2.966775512695312500e+02 9.343261718750000000e-01 0.000000000000000000e+00 4.705882370471954346e-01 2.645240478515625000e+03 3.593512535095214844e+00 8.000000000000000000e+00 3.000000000000000000e+00 2.837250976562500000e+02 5.625000000000000000e+01 5.325000000000000000e+01
5.000000000000000000e+01 4.646538461538459615e+02 3.029967041015625000e+02 8.437194824218750000e-01 0.000000000000000000e+00 0.000000000000000000e+00 2.627784912109375000e+03 3.481635332107543945e+00 1.300000000000000000e+01 4.000000000000000000e+00 5.470896606445312500e+02 5.675000000000000000e+01 5.325000000000000000e+01
6.000000000000000000e+01 4.411769230769231172e+02 3.013580932617187500e+02 7.531433105468750000e-01 0.000000000000000000e+00 0.000000000000000000e+00 2.610329345703125000e+03 3.378556966781616211e+00 1.300000000000000000e+01 4.000000000000000000e+00 6.980343627929687500e+02 5.725000000000000000e+01 5.325000000000000000e+01
1.800000000000000000e+01 4.258769230769233332e+02 2.813196411132812500e+02 6.625671386718750000e-01 0.000000000000000000e+00 0.000000000000000000e+00 2.592873779296875000e+03 3.319484949111938477e+00 1.300000000000000000e+01 1.000000000000000000e+00 4.676397094726562500e+02 5.775000000000000000e+01 5.325000000000000000e+01
2.600000000000000000e+01 4.184769230769231285e+02 2.486660766601562500e+02 6.022033691406250000e-01 0.000000000000000000e+00 0.000000000000000000e+00 2.586023681640625000e+03 3.308620691299438477e+00 1.300000000000000000e+01 3.000000000000000000e+00 6.478937988281250000e+02 5.825000000000000000e+01 5.325000000000000000e+01
2.000000000000000000e+00 4.011384615384617405e+02 2.224001464843750000e+02 6.325378417968750000e-01 0.000000000000000000e+00 5.294117927551269531e-01 2.610990234375000000e+03 3.383525848388671875e+00 1.300000000000000000e+01 1.000000000000000000e+00 3.832819213867187500e+02 5.875000000000000000e+01 5.325000000000000000e+01
3.000000000000000000e+00 3.538615384615384301e+02 1.930435485839843750e+02 1.242828369140625000e+00 0.000000000000000000e+00 8.823529481887817383e-01 2.845105712890625000e+03 3.629739046096801758e+00 4.000000000000000000e+00 1.000000000000000000e+00 2.273863983154296875e+02 6.175000000000000000e+01 5.325000000000000000e+01
1.100000000000000000e+01 3.391307692307692605e+02 1.806306304931640625e+02 1.738922119140625000e+00 0.000000000000000000e+00 1.823529362678527832e+00 2.974257324218750000e+03 3.642190217971801758e+00 3.000000000000000000e+00 1.000000000000000000e+00 1.473574676513671875e+02 6.375000000000000000e+01 5.325000000000000000e+01
2.600000000000000000e+01 3.363923076923075541e+02 1.778815917968750000e+02 1.718444824218750000e+00 0.000000000000000000e+00 1.882352948188781738e+00 2.971709472656250000e+03 3.640568733215332031e+00 3.000000000000000000e+00 3.000000000000000000e+00 1.932831420898437500e+02 6.425000000000000000e+01 5.325000000000000000e+01
1.600000000000000000e+01 6.583615384615385437e+02 3.591873474121093750e+02 3.388122558593750000e+00 0.000000000000000000e+00 7.647058963775634766e-01 2.857676513671875000e+03 3.605206251144409180e+00 5.000000000000000000e+00 1.000000000000000000e+00 1.931282348632812500e+02 3.325000000000000000e+01 5.375000000000000000e+01
9.000000000000000000e+00 6.502384615384617064e+02 3.710079345703125000e+02 3.296325683593750000e+00 0.000000000000000000e+00 1.235294103622436523e+00 2.847284667968750000e+03 3.615271091461181641e+00 5.000000000000000000e+00 1.000000000000000000e+00 1.714780273437500000e+02 3.375000000000000000e+01 5.375000000000000000e+01
6.800000000000000000e+01 6.505769230769233218e+02 3.791465759277343750e+02 3.306701660156250000e+00 0.000000000000000000e+00 8.235294222831726074e-01 2.853958251953125000e+03 3.621253967285156250e+00 5.000000000000000000e+00 4.000000000000000000e+00 1.892832183837890625e+02 3.425000000000000000e+01 5.375000000000000000e+01
5.500000000000000000e+01 6.563230769230769965e+02 3.730465698242187500e+02 3.317108154296875000e+00 0.000000000000000000e+00 5.294117927551269531e-01 2.860631591796875000e+03 3.624489784240722656e+00 5.000000000000000000e+00 4.000000000000000000e+00 1.902006378173828125e+02 3.475000000000000000e+01 5.375000000000000000e+01
1.600000000000000000e+01 6.681461538461536520e+02 3.610839843750000000e+02 3.327484130859375000e+00 0.000000000000000000e+00 0.000000000000000000e+00 2.867305175781250000e+03 3.623652219772338867e+00 5.000000000000000000e+00 1.000000000000000000e+00 1.757378540039062500e+02 3.525000000000000000e+01 5.375000000000000000e+01
6.200000000000000000e+01 6.639230769230764508e+02 3.545002441406250000e+02 3.343688964843750000e+00 0.000000000000000000e+00 5.882353186607360840e-01 2.875381103515625000e+03 3.621279478073120117e+00 5.000000000000000000e+00 4.000000000000000000e+00 2.175940399169921875e+02 3.575000000000000000e+01 5.375000000000000000e+01
5.000000000000000000e+01 6.145461538461539703e+02 3.162456054687500000e+02 2.938537597656250000e+00 0.000000000000000000e+00 0.000000000000000000e+00 2.882572753906250000e+03 3.663319587707519531e+00 5.000000000000000000e+00 4.000000000000000000e+00 1.477017517089843750e+02 4.225000000000000000e+01 5.375000000000000000e+01
6.000000000000000000e+00 5.852230769230768601e+02 3.097384338378906250e+02 2.620422363281250000e+00 0.000000000000000000e+00 2.000000000000000000e+00 2.860991699218750000e+03 3.642803192138671875e+00 8.000000000000000000e+00 1.000000000000000000e+00 1.457628326416015625e+02 4.375000000000000000e+01 5.375000000000000000e+01
5.100000000000000000e+01 5.504769230769227306e+02 2.670532226562500000e+02 2.609649658203125000e+00 0.000000000000000000e+00 5.882353186607360840e-01 2.922999267578125000e+03 3.655123472213745117e+00 5.000000000000000000e+00 4.000000000000000000e+00 2.283115539550781250e+02 4.625000000000000000e+01 5.375000000000000000e+01
3.000000000000000000e+01 5.266999999999998181e+02 2.577000122070312500e+02 2.726196289062500000e+00 0.000000000000000000e+00 1.705882310867309570e+00 2.969254882812500000e+03 3.660778999328613281e+00 8.000000000000000000e+00 3.000000000000000000e+00 2.345110778808593750e+02 4.725000000000000000e+01 5.375000000000000000e+01
1.000000000000000000e+01 4.827538461538461547e+02 2.579754333496093750e+02 2.836425781250000000e+00 0.000000000000000000e+00 1.294117689132690430e+00 3.017525146484375000e+03 3.688825607299804688e+00 8.000000000000000000e+00 1.000000000000000000e+00 1.959526367187500000e+02 4.825000000000000000e+01 5.375000000000000000e+01
5.900000000000000000e+01 5.107846153846153925e+02 3.234014587402343750e+02 5.923767089843750000e-01 0.000000000000000000e+00 0.000000000000000000e+00 2.549639648437500000e+03 3.446463346481323242e+00 1.300000000000000000e+01 4.000000000000000000e+00 4.962461242675781250e+02 5.675000000000000000e+01 5.375000000000000000e+01
5.000000000000000000e+01 4.876538461538460183e+02 3.112016296386718750e+02 5.113830566406250000e-01 0.000000000000000000e+00 0.000000000000000000e+00 2.532626953125000000e+03 3.321893215179443359e+00 1.300000000000000000e+01 4.000000000000000000e+00 4.943657226562500000e+02 5.725000000000000000e+01 5.375000000000000000e+01
5.800000000000000000e+01 4.708461538461538680e+02 2.833054199218750000e+02 4.303894042968750000e-01 9.999999776482582092e-03 0.000000000000000000e+00 2.515614257812500000e+03 3.260492324829101562e+00 1.300000000000000000e+01 4.000000000000000000e+00 7.470801391601562500e+02 5.775000000000000000e+01 5.375000000000000000e+01
1.700000000000000000e+01 4.633692307692306258e+02 2.484966888427734375e+02 3.817749023437500000e-01 0.000000000000000000e+00 5.882353186607360840e-01 2.509181640625000000e+03 2.100548267364501953e+00 1.300000000000000000e+01 1.000000000000000000e+00 5.972934570312500000e+02 5.825000000000000000e+01 5.375000000000000000e+01
2.000000000000000000e+01 4.372307692307691696e+02 2.244204864501953125e+02 4.302368164062500000e-01 0.000000000000000000e+00 5.882353186607360840e-01 2.534489013671875000e+03 3.221236705780029297e+00 4.000000000000000000e+00 3.000000000000000000e+00 4.723541564941406250e+02 5.875000000000000000e+01 5.375000000000000000e+01
1.700000000000000000e+01 4.170846153846154039e+02 2.096586761474609375e+02 6.259765625000000000e-01 0.000000000000000000e+00 1.588235259056091309e+00 2.621619873046875000e+03 3.482532024383544922e+00 4.000000000000000000e+00 1.000000000000000000e+00 3.902423706054687500e+02 6.025000000000000000e+01 5.375000000000000000e+01
5.000000000000000000e+00 3.809846153846153811e+02 2.048425445556640625e+02 9.240722656250000000e-01 0.000000000000000000e+00 2.176470518112182617e+00 2.717068115234375000e+03 3.570419788360595703e+00 4.000000000000000000e+00 1.000000000000000000e+00 2.401904754638671875e+02 6.125000000000000000e+01 5.375000000000000000e+01
1.000000000000000000e+00 3.712769230769232536e+02 2.016012420654296875e+02 1.073120117187500000e+00 0.000000000000000000e+00 2.176470518112182617e+00 2.764792236328125000e+03 3.594515800476074219e+00 4.000000000000000000e+00 1.000000000000000000e+00 2.186956634521484375e+02 6.175000000000000000e+01 5.375000000000000000e+01
1.000000000000000000e+00 3.635538461538459956e+02 1.826876831054687500e+02 1.536285400390625000e+00 0.000000000000000000e+00 2.823529481887817383e+00 2.893200683593750000e+03 3.602374792098999023e+00 8.000000000000000000e+00 1.000000000000000000e+00 1.133337020874023438e+02 6.375000000000000000e+01 5.375000000000000000e+01
2.000000000000000000e+01 6.798615384615380890e+02 3.536388854980468750e+02 3.242584228515625000e+00 0.000000000000000000e+00 2.941176593303680420e-01 2.854178710937500000e+03 3.584259271621704102e+00 5.000000000000000000e+00 3.000000000000000000e+00 2.449007568359375000e+02 3.675000000000000000e+01 5.425000000000000000e+01
1.600000000000000000e+01 6.444153846153845961e+02 3.470938415527343750e+02 3.324371337890625000e+00 0.000000000000000000e+00 4.705882370471954346e-01 2.880436523437500000e+03 3.597013473510742188e+00 5.000000000000000000e+00 1.000000000000000000e+00 2.015514678955078125e+02 3.775000000000000000e+01 5.425000000000000000e+01
3.600000000000000000e+01 6.109076923076925141e+02 3.229287719726562500e+02 3.174682617187500000e+00 0.000000000000000000e+00 8.235294222831726074e-01 2.875743896484375000e+03 3.620387554168701172e+00 5.000000000000000000e+00 3.000000000000000000e+00 1.534916839599609375e+02 4.125000000000000000e+01 5.425000000000000000e+01
5.000000000000000000e+00 6.130923076923077133e+02 3.286268310546875000e+02 3.035156250000000000e+00 0.000000000000000000e+00 2.705882310867309570e+00 2.859720458984375000e+03 3.622913360595703125e+00 8.000000000000000000e+00 1.000000000000000000e+00 1.346581268310546875e+02 4.175000000000000000e+01 5.425000000000000000e+01
2.800000000000000000e+01 6.136000000000001364e+02 3.295885009765625000e+02 2.895660400390625000e+00 0.000000000000000000e+00 1.294117689132690430e+00 2.843696777343750000e+03 3.629751205444335938e+00 8.000000000000000000e+00 3.000000000000000000e+00 1.491205139160156250e+02 4.225000000000000000e+01 5.425000000000000000e+01
5.000000000000000000e+01 6.135230769230767010e+02 3.286161193847656250e+02 2.756134033203125000e+00 0.000000000000000000e+00 8.235294222831726074e-01 2.827673339843750000e+03 3.583345890045166016e+00 5.000000000000000000e+00 4.000000000000000000e+00 1.219635314941406250e+02 4.275000000000000000e+01 5.425000000000000000e+01
4.200000000000000000e+01 5.828230769230768828e+02 3.100152893066406250e+02 2.377075195312500000e+00 0.000000000000000000e+00 1.058823585510253906e+00 2.796550048828125000e+03 3.630816221237182617e+00 5.000000000000000000e+00 3.000000000000000000e+00 1.956409606933593750e+02 4.425000000000000000e+01 5.425000000000000000e+01
7.000000000000000000e+00 5.485846153846151765e+02 2.531233825683593750e+02 2.266479492187500000e+00 0.000000000000000000e+00 2.000000000000000000e+00 2.827020996093750000e+03 3.637402534484863281e+00 5.000000000000000000e+00 1.000000000000000000e+00 1.582119598388671875e+02 4.625000000000000000e+01 5.425000000000000000e+01
1.400000000000000000e+01 5.207769230769231399e+02 2.465632324218750000e+02 2.332672119140625000e+00 0.000000000000000000e+00 1.764705896377563477e+00 2.863622802734375000e+03 3.654938936233520508e+00 8.000000000000000000e+00 1.000000000000000000e+00 1.795870971679687500e+02 4.725000000000000000e+01 5.425000000000000000e+01
1.100000000000000000e+01 5.189615384615387939e+02 2.546116180419921875e+02 2.531951904296875000e+00 0.000000000000000000e+00 1.941176414489746094e+00 2.938733642578125000e+03 3.684598207473754883e+00 5.000000000000000000e+00 1.000000000000000000e+00 6.129279708862304688e+01 4.975000000000000000e+01 5.425000000000000000e+01
3.000000000000000000e+00 5.478230769230769965e+02 2.581915283203125000e+02 2.569732666015625000e+00 0.000000000000000000e+00 2.882352828979492188e+00 2.944715820312500000e+03 3.662284612655639648e+00 4.000000000000000000e+00 1.000000000000000000e+00 1.464378204345703125e+02 5.075000000000000000e+01 5.425000000000000000e+01
8.000000000000000000e+00 5.544307692307689877e+02 2.816074218750000000e+02 1.348876953125000000e+00 0.000000000000000000e+00 0.000000000000000000e+00 2.652738281250000000e+03 3.548085927963256836e+00 4.000000000000000000e+00 1.000000000000000000e+00 3.506892089843750000e+02 5.425000000000000000e+01 5.425000000000000000e+01
3.000000000000000000e+00 5.516230769230771784e+02 3.206644592285156250e+02 8.821411132812500000e-01 0.000000000000000000e+00 1.588235259056091309e+00 2.568632568359375000e+03 3.601085901260375977e+00 4.000000000000000000e+00 1.000000000000000000e+00 1.878253326416015625e+02 5.525000000000000000e+01 5.425000000000000000e+01
4.000000000000000000e+00 5.223230769230772239e+02 3.350401000976562500e+02 4.124145507812500000e-01 0.000000000000000000e+00 5.294117927551269531e-01 2.488064208984375000e+03 3.596793889999389648e+00 8.000000000000000000e+00 1.000000000000000000e+00 2.200720672607421875e+02 5.625000000000000000e+01 5.425000000000000000e+01
5.900000000000000000e+01 5.033384615384617859e+02 3.343856506347656250e+02 3.410034179687500000e-01 0.000000000000000000e+00 0.000000000000000000e+00 2.471494384765625000e+03 3.514649629592895508e+00 1.300000000000000000e+01 4.000000000000000000e+00 1.873532104492187500e+02 5.675000000000000000e+01 5.425000000000000000e+01
5.400000000000000000e+01 5.058692307692307395e+02 3.242535095214843750e+02 2.696228027343750000e-01 0.000000000000000000e+00 0.000000000000000000e+00 2.454924560546875000e+03 3.371355772018432617e+00 1.300000000000000000e+01 4.000000000000000000e+00 4.551225280761718750e+02 5.725000000000000000e+01 5.425000000000000000e+01
6.400000000000000000e+01 5.023538461538463480e+02 3.002672119140625000e+02 1.982116699218750000e-01 0.000000000000000000e+00 0.000000000000000000e+00 2.438354736328125000e+03 3.213618278503417969e+00 1.300000000000000000e+01 4.000000000000000000e+00 5.725483398437500000e+02 5.775000000000000000e+01 5.425000000000000000e+01
4.000000000000000000e+01 5.099461538461538339e+02 2.634300842285156250e+02 1.613159179687500000e-01 9.999999776482582092e-03 0.000000000000000000e+00 2.432339355468750000e+03 1.236236214637756348e+00 1.300000000000000000e+01 3.000000000000000000e+00 9.241929321289062500e+02 5.825000000000000000e+01 5.425000000000000000e+01
2.300000000000000000e+01 4.921307692307692605e+02 2.331593170166015625e+02 2.279663085937500000e-01 0.000000000000000000e+00 0.000000000000000000e+00 2.457987792968750000e+03 1.818484187126159668e+00 1.300000000000000000e+01 3.000000000000000000e+00 6.018411865234375000e+02 5.875000000000000000e+01 5.425000000000000000e+01
1.700000000000000000e+01 4.799538461538462002e+02 2.123859252929687500e+02 2.946472167968750000e-01 0.000000000000000000e+00 0.000000000000000000e+00 2.483636230468750000e+03 3.246522426605224609e+00 1.300000000000000000e+01 1.000000000000000000e+00 5.306268920898437500e+02 5.925000000000000000e+01 5.425000000000000000e+01
1.200000000000000000e+01 4.560307692307693515e+02 2.141702423095703125e+02 4.673156738281250000e-01 0.000000000000000000e+00 1.058823585510253906e+00 2.545304443359375000e+03 3.434138059616088867e+00 4.000000000000000000e+00 1.000000000000000000e+00 3.531076354980468750e+02 6.025000000000000000e+01 5.425000000000000000e+01
1.000000000000000000e+00 3.952615384615382936e+02 2.053731384277343750e+02 9.034423828125000000e-01 0.000000000000000000e+00 1.294117689132690430e+00 2.684478759765625000e+03 3.549756526947021484e+00 8.000000000000000000e+00 1.000000000000000000e+00 2.112865295410156250e+02 6.175000000000000000e+01 5.425000000000000000e+01
1.000000000000000000e+00 3.659153846153845393e+02 1.681106567382812500e+02 1.240234375000000000e+00 0.000000000000000000e+00 1.823529362678527832e+00 2.805082519531250000e+03 3.578419923782348633e+00 4.000000000000000000e+00 1.000000000000000000e+00 9.714221954345703125e+01 6.475000000000000000e+01 5.425000000000000000e+01
1.000000000000000000e+00 3.456692307692306940e+02 1.730307312011718750e+02 9.880065917968750000e-01 0.000000000000000000e+00 2.588235378265380859e+00 2.771482910156250000e+03 3.535060882568359375e+00 4.000000000000000000e+00 1.000000000000000000e+00 1.593827056884765625e+02 6.625000000000000000e+01 5.425000000000000000e+01
1.900000000000000000e+01 7.287538461538458705e+02 3.725628356933593750e+02 2.944305419921875000e+00 0.000000000000000000e+00 0.000000000000000000e+00 2.744305664062500000e+03 3.502635955810546875e+00 5.000000000000000000e+00 1.000000000000000000e+00 2.440444335937500000e+02 3.325000000000000000e+01 5.475000000000000000e+01
7.000000000000000000e+01 7.284000000000000909e+02 3.631805725097656250e+02 2.866302490234375000e+00 0.000000000000000000e+00 4.705882370471954346e-01 2.735225097656250000e+03 3.500573396682739258e+00 5.000000000000000000e+00 4.000000000000000000e+00 2.139884033203125000e+02 3.375000000000000000e+01 5.475000000000000000e+01
3.200000000000000000e+01 7.307153846153843233e+02 3.570527343750000000e+02 2.874328613281250000e+00 0.000000000000000000e+00 5.882352963089942932e-02 2.741655029296875000e+03 2.472105503082275391e+00 5.000000000000000000e+00 3.000000000000000000e+00 1.879976196289062500e+02 3.425000000000000000e+01 5.475000000000000000e+01
4.800000000000000000e+01 7.301692307692309214e+02 3.552312316894531250e+02 2.882385253906250000e+00 0.000000000000000000e+00 5.294117927551269531e-01 2.748084960937500000e+03 2.648486375808715820e+00 5.000000000000000000e+00 4.000000000000000000e+00 2.106355743408203125e+02 3.475000000000000000e+01 5.475000000000000000e+01
2.000000000000000000e+01 7.054307692307695561e+02 3.562069396972656250e+02 2.908294677734375000e+00 0.000000000000000000e+00 0.000000000000000000e+00 2.763075683593750000e+03 3.539563655853271484e+00 5.000000000000000000e+00 3.000000000000000000e+00 1.610595245361328125e+02 3.575000000000000000e+01 5.475000000000000000e+01
4.300000000000000000e+01 6.982384615384612516e+02 3.613152465820312500e+02 3.003051757812500000e+00 0.000000000000000000e+00 2.941176593303680420e-01 2.792983642578125000e+03 3.572579145431518555e+00 5.000000000000000000e+00 3.000000000000000000e+00 2.174003295898437500e+02 3.675000000000000000e+01 5.475000000000000000e+01
2.100000000000000000e+01 5.831076923076921048e+02 3.255428771972656250e+02 3.200897216796875000e+00 0.000000000000000000e+00 1.176470637321472168e+00 2.852970458984375000e+03 3.583631515502929688e+00 5.000000000000000000e+00 3.000000000000000000e+00 9.630001831054687500e+01 3.975000000000000000e+01 5.475000000000000000e+01
2.600000000000000000e+01 5.764846153846151537e+02 3.270700073242187500e+02 3.160858154296875000e+00 0.000000000000000000e+00 1.235294103622436523e+00 2.848013916015625000e+03 3.595187902450561523e+00 5.000000000000000000e+00 3.000000000000000000e+00 1.139644927978515625e+02 4.025000000000000000e+01 5.475000000000000000e+01
6.000000000000000000e+01 5.914307692307692150e+02 3.310405578613281250e+02 3.120788574218750000e+00 0.000000000000000000e+00 5.882353186607360840e-01 2.843057373046875000e+03 3.598292589187622070e+00 5.000000000000000000e+00 4.000000000000000000e+00 1.014631347656250000e+02 4.075000000000000000e+01 5.475000000000000000e+01
6.600000000000000000e+01 6.086615384615383846e+02 3.367554321289062500e+02 3.080718994140625000e+00 0.000000000000000000e+00 2.352941185235977173e-01 2.838100830078125000e+03 3.595026731491088867e+00 5.000000000000000000e+00 4.000000000000000000e+00 1.317751159667968750e+02 4.125000000000000000e+01 5.475000000000000000e+01
4.500000000000000000e+01 6.217769230769231399e+02 3.409930725097656250e+02 2.949035644531250000e+00 0.000000000000000000e+00 1.176470637321472168e+00 2.822739501953125000e+03 3.596689462661743164e+00 5.000000000000000000e+00 4.000000000000000000e+00 9.356835937500000000e+01 4.175000000000000000e+01 5.475000000000000000e+01
6.400000000000000000e+01 6.295307692307692378e+02 3.323093872070312500e+02 2.553039550781250000e+00 0.000000000000000000e+00 5.294117927551269531e-01 2.777747802734375000e+03 3.514018058776855469e+00 5.000000000000000000e+00 4.000000000000000000e+00 1.335058898925781250e+02 4.325000000000000000e+01 5.475000000000000000e+01
1.300000000000000000e+01 6.226230769230769511e+02 3.270808410644531250e+02 2.417449951171875000e+00 0.000000000000000000e+00 2.352941185235977173e-01 2.766757324218750000e+03 3.591250896453857422e+00 5.000000000000000000e+00 1.000000000000000000e+00 1.526714324951171875e+02 4.375000000000000000e+01 5.475000000000000000e+01
5.700000000000000000e+01 6.065846153846152902e+02 3.214105529785156250e+02 2.281860351562500000e+00 0.000000000000000000e+00 0.000000000000000000e+00 2.755767089843750000e+03 3.595456600189208984e+00 5.000000000000000000e+00 4.000000000000000000e+00 1.715942840576171875e+02 4.425000000000000000e+01 5.475000000000000000e+01
2.800000000000000000e+01 5.786923076923078497e+02 2.980239257812500000e+02 2.076660156250000000e+00 0.000000000000000000e+00 5.294117927551269531e-01 2.744862060546875000e+03 3.606433153152465820e+00 5.000000000000000000e+00 3.000000000000000000e+00 1.235726089477539062e+02 4.525000000000000000e+01 5.475000000000000000e+01
3.300000000000000000e+01 5.407538461538462116e+02 2.360399017333984375e+02 2.065826416015625000e+00 0.000000000000000000e+00 1.529411792755126953e+00 2.778343261718750000e+03 3.612675666809082031e+00 8.000000000000000000e+00 3.000000000000000000e+00 9.698178863525390625e+01 4.675000000000000000e+01 5.475000000000000000e+01
5.400000000000000000e+01 5.333384615384615017e+02 2.398001556396484375e+02 2.080902099609375000e+00 0.000000000000000000e+00 0.000000000000000000e+00 2.792757324218750000e+03 3.614760875701904297e+00 8.000000000000000000e+00 4.000000000000000000e+00 1.748006439208984375e+02 4.725000000000000000e+01 5.475000000000000000e+01
3.000000000000000000e+00 5.328999999999999773e+02 2.560421752929687500e+02 2.123474121093750000e+00 0.000000000000000000e+00 2.352941274642944336e+00 2.823754150390625000e+03 3.624109983444213867e+00 8.000000000000000000e+00 1.000000000000000000e+00 8.328344726562500000e+01 4.825000000000000000e+01 5.475000000000000000e+01
1.200000000000000000e+01 5.486692307692308077e+02 2.630267944335937500e+02 2.206512451171875000e+00 0.000000000000000000e+00 1.529411792755126953e+00 2.851082031250000000e+03 3.631812334060668945e+00 5.000000000000000000e+00 1.000000000000000000e+00 1.617150878906250000e+02 4.975000000000000000e+01 5.475000000000000000e+01
3.800000000000000000e+01 5.538230769230768828e+02 2.650092773437500000e+02 2.237365722656250000e+00 0.000000000000000000e+00 1.470588207244873047e+00 2.856996582031250000e+03 3.621408224105834961e+00 8.000000000000000000e+00 3.000000000000000000e+00 1.510335845947265625e+02 5.025000000000000000e+01 5.475000000000000000e+01
7.000000000000000000e+00 5.540615384615383618e+02 2.690157165527343750e+02 2.236846923828125000e+00 0.000000000000000000e+00 8.235294222831726074e-01 2.855136962890625000e+03 3.617745161056518555e+00 8.000000000000000000e+00 1.000000000000000000e+00 1.202289581298828125e+02 5.075000000000000000e+01 5.475000000000000000e+01
2.800000000000000000e+01 5.555384615384616609e+02 2.751479187011718750e+02 2.047454833984375000e+00 0.000000000000000000e+00 1.058823585510253906e+00 2.804771484375000000e+03 3.581621646881103516e+00 8.000000000000000000e+00 3.000000000000000000e+00 1.204642791748046875e+02 5.175000000000000000e+01 5.475000000000000000e+01
5.000000000000000000e+00 5.587846153846151083e+02 2.866580200195312500e+02 1.026184082031250000e+00 0.000000000000000000e+00 1.941176414489746094e+00 2.558835449218750000e+03 3.555248737335205078e+00 4.000000000000000000e+00 1.000000000000000000e+00 1.337062835693359375e+02 5.475000000000000000e+01 5.475000000000000000e+01
9.000000000000000000e+00 5.500999999999999091e+02 3.304317016601562500e+02 5.989379882812500000e-01 0.000000000000000000e+00 5.294117927551269531e-01 2.484772949218750000e+03 3.573733568191528320e+00 4.000000000000000000e+00 1.000000000000000000e+00 1.860463714599609375e+02 5.575000000000000000e+01 5.475000000000000000e+01
9.000000000000000000e+00 5.281769230769231172e+02 3.318008422851562500e+02 3.085327148437500000e-01 0.000000000000000000e+00 0.000000000000000000e+00 2.432072021484375000e+03 2.625128984451293945e+00 8.000000000000000000e+00 1.000000000000000000e+00 1.213464660644531250e+02 5.675000000000000000e+01 5.475000000000000000e+01
6.200000000000000000e+01 5.305384615384614335e+02 3.219046936035156250e+02 2.317504882812500000e-01 0.000000000000000000e+00 0.000000000000000000e+00 2.416402343750000000e+03 2.717149734497070312e+00 1.300000000000000000e+01 4.000000000000000000e+00 3.026665649414062500e+02 5.725000000000000000e+01 5.475000000000000000e+01
5.500000000000000000e+01 5.368461538461541522e+02 3.048652038574218750e+02 1.549987792968750000e-01 0.000000000000000000e+00 5.882352963089942932e-02 2.400732666015625000e+03 3.243438243865966797e+00 1.300000000000000000e+01 4.000000000000000000e+00 5.757077636718750000e+02 5.775000000000000000e+01 5.475000000000000000e+01
1.200000000000000000e+01 5.351461538461539931e+02 2.758383483886718750e+02 1.110534667968750000e-01 0.000000000000000000e+00 0.000000000000000000e+00 2.394608398437500000e+03 3.147150039672851562e+00 1.300000000000000000e+01 1.000000000000000000e+00 5.026582946777343750e+02 5.825000000000000000e+01 5.475000000000000000e+01
5.200000000000000000e+01 5.457384615384614790e+02 2.480297546386718750e+02 1.657104492187500000e-01 0.000000000000000000e+00 0.000000000000000000e+00 2.417120849609375000e+03 2.910738468170166016e+00 1.300000000000000000e+01 4.000000000000000000e+00 4.825999755859375000e+02 5.875000000000000000e+01 5.475000000000000000e+01
5.900000000000000000e+01 5.395461538461538566e+02 2.324608917236328125e+02 2.203674316406250000e-01 9.999999776482582092e-03 0.000000000000000000e+00 2.439633056640625000e+03 1.475996613502502441e+00 1.300000000000000000e+01 4.000000000000000000e+00 7.660699462890625000e+02 5.925000000000000000e+01 5.475000000000000000e+01
2.300000000000000000e+01 4.958230769230767123e+02 2.249004821777343750e+02 3.704528808593750000e-01 0.000000000000000000e+00 9.411764740943908691e-01 2.494997070312500000e+03 3.363482713699340820e+00 8.000000000000000000e+00 3.000000000000000000e+00 3.755346374511718750e+02 6.025000000000000000e+01 5.475000000000000000e+01
1.100000000000000000e+01 4.632615384615380663e+02 2.190840606689453125e+02 5.067138671875000000e-01 0.000000000000000000e+00 1.235294103622436523e+00 2.538188232421875000e+03 3.445446252822875977e+00 5.000000000000000000e+00 1.000000000000000000e+00 2.791838378906250000e+02 6.075000000000000000e+01 5.475000000000000000e+01
9.000000000000000000e+00 4.240923076923078838e+02 2.109542999267578125e+02 7.792358398437500000e-01 0.000000000000000000e+00 1.235294103622436523e+00 2.624570556640625000e+03 3.511337280273437500e+00 8.000000000000000000e+00 1.000000000000000000e+00 2.232300567626953125e+02 6.175000000000000000e+01 5.475000000000000000e+01
7.000000000000000000e+00 3.892461538461539021e+02 1.709424438476562500e+02 1.094055175781250000e+00 0.000000000000000000e+00 2.941176593303680420e-01 2.743579101562500000e+03 3.537842512130737305e+00 4.000000000000000000e+00 1.000000000000000000e+00 1.188794784545898438e+02 6.475000000000000000e+01 5.475000000000000000e+01
1.000000000000000000e+00 3.415076923076924231e+02 1.718326873779296875e+02 5.145263671875000000e-01 0.000000000000000000e+00 1.235294103622436523e+00 2.668677001953125000e+03 3.472283124923706055e+00 4.000000000000000000e+00 1.000000000000000000e+00 1.353287658691406250e+02 6.775000000000000000e+01 5.475000000000000000e+01
5.100000000000000000e+01 7.315384615384612061e+02 3.577953796386718750e+02 2.675415039062500000e+00 0.000000000000000000e+00 3.529411852359771729e-01 2.682085693359375000e+03 3.465804815292358398e+00 5.000000000000000000e+00 4.000000000000000000e+00 2.460158233642578125e+02 3.375000000000000000e+01 5.525000000000000000e+01
5.400000000000000000e+01 7.365153846153843915e+02 3.534889221191406250e+02 2.665618896484375000e+00 0.000000000000000000e+00 3.529411852359771729e-01 2.690369140625000000e+03 3.477294921875000000e+00 5.000000000000000000e+00 4.000000000000000000e+00 2.098752746582031250e+02 3.475000000000000000e+01 5.525000000000000000e+01
5.500000000000000000e+01 7.467384615384617064e+02 3.606624755859375000e+02 2.668304443359375000e+00 0.000000000000000000e+00 0.000000000000000000e+00 2.701286621093750000e+03 3.495728731155395508e+00 5.000000000000000000e+00 4.000000000000000000e+00 2.165968475341796875e+02 3.575000000000000000e+01 5.525000000000000000e+01
6.400000000000000000e+01 7.070461538461543114e+02 3.666450195312500000e+02 2.713256835937500000e+00 0.000000000000000000e+00 5.294117927551269531e-01 2.715964111328125000e+03 3.527613401412963867e+00 5.000000000000000000e+00 4.000000000000000000e+00 1.975652770996093750e+02 3.625000000000000000e+01 5.525000000000000000e+01
3.800000000000000000e+01 7.002307692307696243e+02 3.711817321777343750e+02 2.758239746093750000e+00 0.000000000000000000e+00 2.941176593303680420e-01 2.730641601562500000e+03 3.547604799270629883e+00 5.000000000000000000e+00 3.000000000000000000e+00 1.892053375244140625e+02 3.675000000000000000e+01 5.525000000000000000e+01
3.800000000000000000e+01 6.886923076923078497e+02 3.720867004394531250e+02 2.803192138671875000e+00 0.000000000000000000e+00 2.941176593303680420e-01 2.745319091796875000e+03 3.559853315353393555e+00 5.000000000000000000e+00 3.000000000000000000e+00 2.037382354736328125e+02 3.725000000000000000e+01 5.525000000000000000e+01
8.000000000000000000e+00 6.468846153846156994e+02 3.545175170898437500e+02 2.989807128906250000e+00 0.000000000000000000e+00 3.529411852359771729e-01 2.789095214843750000e+03 3.557503700256347656e+00 5.000000000000000000e+00 1.000000000000000000e+00 1.247041549682617188e+02 3.875000000000000000e+01 5.525000000000000000e+01
3.200000000000000000e+01 6.000923076923077133e+02 3.410231628417968750e+02 3.055450439453125000e+00 0.000000000000000000e+00 2.352941185235977173e-01 2.803669921875000000e+03 3.566973924636840820e+00 8.000000000000000000e+00 3.000000000000000000e+00 1.405825347900390625e+02 3.925000000000000000e+01 5.525000000000000000e+01
5.200000000000000000e+01 5.773769230769231626e+02 3.337171020507812500e+02 3.053955078125000000e+00 0.000000000000000000e+00 6.470588445663452148e-01 2.805899658203125000e+03 3.573183298110961914e+00 5.000000000000000000e+00 4.000000000000000000e+00 1.368650970458984375e+02 3.975000000000000000e+01 5.525000000000000000e+01
5.100000000000000000e+01 5.818769230769229353e+02 3.314318847656250000e+02 3.030120849609375000e+00 0.000000000000000000e+00 2.352941185235977173e-01 2.804013916015625000e+03 3.573166608810424805e+00 5.000000000000000000e+00 4.000000000000000000e+00 1.204514389038085938e+02 4.025000000000000000e+01 5.525000000000000000e+01
5.000000000000000000e+01 5.941153846153843006e+02 3.344762573242187500e+02 3.006256103515625000e+00 0.000000000000000000e+00 8.235294222831726074e-01 2.802128417968750000e+03 3.572174310684204102e+00 5.000000000000000000e+00 4.000000000000000000e+00 1.196098175048828125e+02 4.075000000000000000e+01 5.525000000000000000e+01
5.500000000000000000e+01 6.327615384615385210e+02 3.440140991210937500e+02 2.736450195312500000e+00 0.000000000000000000e+00 8.823529481887817383e-01 2.771249023437500000e+03 3.567663431167602539e+00 5.000000000000000000e+00 4.000000000000000000e+00 1.279598159790039062e+02 4.225000000000000000e+01 5.525000000000000000e+01
5.400000000000000000e+01 6.437846153846155630e+02 3.424568176269531250e+02 2.613464355468750000e+00 0.000000000000000000e+00 5.294117927551269531e-01 2.756752197265625000e+03 3.559275388717651367e+00 5.000000000000000000e+00 4.000000000000000000e+00 1.592570648193359375e+02 4.275000000000000000e+01 5.525000000000000000e+01
4.000000000000000000e+00 5.662076923076922412e+02 2.842868957519531250e+02 1.919525146484375000e+00 0.000000000000000000e+00 2.058823585510253906e+00 2.705059570312500000e+03 3.584138393402099609e+00 8.000000000000000000e+00 1.000000000000000000e+00 1.624299011230468750e+02 4.575000000000000000e+01 5.525000000000000000e+01
5.200000000000000000e+01 5.487461538461537884e+02 2.454719085693359375e+02 1.847015380859375000e+00 0.000000000000000000e+00 0.000000000000000000e+00 2.715003662109375000e+03 3.579886913299560547e+00 5.000000000000000000e+00 4.000000000000000000e+00 1.431455535888671875e+02 4.675000000000000000e+01 5.525000000000000000e+01
1.000000000000000000e+01 5.587307692307691696e+02 2.460185699462890625e+02 1.839660644531250000e+00 0.000000000000000000e+00 0.000000000000000000e+00 2.724476318359375000e+03 3.577327489852905273e+00 5.000000000000000000e+00 1.000000000000000000e+00 1.383464660644531250e+02 4.725000000000000000e+01 5.525000000000000000e+01
4.000000000000000000e+00 5.558000000000000682e+02 2.859722290039062500e+02 1.846282958984375000e+00 0.000000000000000000e+00 2.058823585510253906e+00 2.746074462890625000e+03 3.579069375991821289e+00 8.000000000000000000e+00 1.000000000000000000e+00 1.312916107177734375e+02 5.125000000000000000e+01 5.525000000000000000e+01
5.000000000000000000e+00 5.585692307692306713e+02 2.858034973144531250e+02 1.785003662109375000e+00 0.000000000000000000e+00 1.588235259056091309e+00 2.724931884765625000e+03 3.560397863388061523e+00 5.000000000000000000e+00 1.000000000000000000e+00 2.152156524658203125e+02 5.175000000000000000e+01 5.525000000000000000e+01
9.000000000000000000e+00 5.632615384615387484e+02 2.405055236816406250e+02 1.294372558593750000e+00 0.000000000000000000e+00 1.117647051811218262e+00 2.589375976562500000e+03 3.544227123260498047e+00 8.000000000000000000e+00 1.000000000000000000e+00 1.494474029541015625e+02 5.375000000000000000e+01 5.525000000000000000e+01
1.100000000000000000e+01 5.613307692307691923e+02 2.970959472656250000e+02 7.592773437500000000e-01 0.000000000000000000e+00 1.470588207244873047e+00 2.478099121093750000e+03 3.549805402755737305e+00 4.000000000000000000e+00 1.000000000000000000e+00 9.899519348144531250e+01 5.525000000000000000e+01 5.525000000000000000e+01
5.700000000000000000e+01 5.530999999999999091e+02 3.081102600097656250e+02 2.923278808593750000e-01 0.000000000000000000e+00 0.000000000000000000e+00 2.395528564453125000e+03 2.517332553863525391e+00 5.000000000000000000e+00 4.000000000000000000e+00 1.871978759765625000e+02 5.675000000000000000e+01 5.525000000000000000e+01
6.500000000000000000e+01 5.579846153846149264e+02 2.952526855468750000e+02 2.090759277343750000e-01 0.000000000000000000e+00 0.000000000000000000e+00 2.380792968750000000e+03 2.174507141113281250e+00 5.000000000000000000e+00 4.000000000000000000e+00 4.938948974609375000e+02 5.725000000000000000e+01 5.525000000000000000e+01
5.800000000000000000e+01 5.565846153846156312e+02 2.822051086425781250e+02 1.258239746093750000e-01 0.000000000000000000e+00 0.000000000000000000e+00 2.366057373046875000e+03 2.585886955261230469e+00 1.300000000000000000e+01 4.000000000000000000e+00 4.213837280273437500e+02 5.775000000000000000e+01 5.525000000000000000e+01
6.000000000000000000e+00 5.580384615384617746e+02 2.708452453613281250e+02 7.348632812500000000e-02 0.000000000000000000e+00 2.941176593303680420e-01 2.359785156250000000e+03 3.318958759307861328e+00 1.300000000000000000e+01 1.000000000000000000e+00 3.499449768066406250e+02 5.825000000000000000e+01 5.525000000000000000e+01
5.800000000000000000e+01 5.758230769230772239e+02 2.682392272949218750e+02 1.542358398437500000e-01 0.000000000000000000e+00 5.882352963089942932e-02 2.398020507812500000e+03 2.980465888977050781e+00 1.300000000000000000e+01 4.000000000000000000e+00 5.497318725585937500e+02 5.925000000000000000e+01 5.525000000000000000e+01
6.100000000000000000e+01 5.865153846153846189e+02 2.691986389160156250e+02 1.946411132812500000e-01 0.000000000000000000e+00 0.000000000000000000e+00 2.417138183593750000e+03 1.953921437263488770e+00 1.300000000000000000e+01 4.000000000000000000e+00 6.353314819335937500e+02 5.975000000000000000e+01 5.525000000000000000e+01
4.400000000000000000e+01 5.366230769230768374e+02 2.573703002929687500e+02 2.781982421875000000e-01 0.000000000000000000e+00 0.000000000000000000e+00 2.446623046875000000e+03 2.177208185195922852e+00 5.000000000000000000e+00 3.000000000000000000e+00 4.412179565429687500e+02 6.025000000000000000e+01 5.525000000000000000e+01
3.300000000000000000e+01 4.955076923076927642e+02 2.448314056396484375e+02 4.049072265625000000e-01 0.000000000000000000e+00 8.823529481887817383e-01 2.486475097656250000e+03 3.394905090332031250e+00 8.000000000000000000e+00 3.000000000000000000e+00 3.096231689453125000e+02 6.075000000000000000e+01 5.525000000000000000e+01
1.200000000000000000e+01 4.648461538461540385e+02 2.349660491943359375e+02 5.316467285156250000e-01 0.000000000000000000e+00 1.352941155433654785e+00 2.526327148437500000e+03 3.446472167968750000e+00 8.000000000000000000e+00 1.000000000000000000e+00 2.400123443603515625e+02 6.125000000000000000e+01 5.525000000000000000e+01
8.000000000000000000e+00 4.463923076923076678e+02 1.934383697509765625e+02 1.028686523437500000e+00 0.000000000000000000e+00 1.176470637321472168e+00 2.678186035156250000e+03 3.509185314178466797e+00 4.000000000000000000e+00 1.000000000000000000e+00 1.576197204589843750e+02 6.375000000000000000e+01 5.525000000000000000e+01
3.000000000000000000e+00 4.011923076923078497e+02 1.906457366943359375e+02 9.167175292968750000e-01 0.000000000000000000e+00 1.647058844566345215e+00 2.686310791015625000e+03 3.503225088119506836e+00 4.000000000000000000e+00 1.000000000000000000e+00 8.717739105224609375e+01 6.525000000000000000e+01 5.525000000000000000e+01
5.900000000000000000e+01 7.406153846153845279e+02 3.580831604003906250e+02 2.591888427734375000e+00 0.000000000000000000e+00 0.000000000000000000e+00 2.644313476562500000e+03 3.426886558532714844e+00 5.000000000000000000e+00 4.000000000000000000e+00 2.356796875000000000e+02 3.325000000000000000e+01 5.575000000000000000e+01
6.800000000000000000e+01 7.355923076923080544e+02 3.527805480957031250e+02 2.484527587890625000e+00 0.000000000000000000e+00 2.352941185235977173e-01 2.628946044921875000e+03 3.426462888717651367e+00 5.000000000000000000e+00 4.000000000000000000e+00 2.385067901611328125e+02 3.375000000000000000e+01 5.575000000000000000e+01
8.000000000000000000e+00 7.360999999999997954e+02 3.526694946289062500e+02 2.466705322265625000e+00 0.000000000000000000e+00 2.941176593303680420e-01 2.630799804687500000e+03 3.438353300094604492e+00 5.000000000000000000e+00 1.000000000000000000e+00 1.917571411132812500e+02 3.425000000000000000e+01 5.575000000000000000e+01
2.500000000000000000e+01 7.310615384615385892e+02 3.541786804199218750e+02 2.448883056640625000e+00 0.000000000000000000e+00 2.941176593303680420e-01 2.632653564453125000e+03 3.446569919586181641e+00 5.000000000000000000e+00 3.000000000000000000e+00 1.842936706542968750e+02 3.475000000000000000e+01 5.575000000000000000e+01
5.400000000000000000e+01 7.524769230769229580e+02 3.571544799804687500e+02 2.431060791015625000e+00 0.000000000000000000e+00 0.000000000000000000e+00 2.634507324218750000e+03 3.444733381271362305e+00 5.000000000000000000e+00 4.000000000000000000e+00 2.539553070068359375e+02 3.525000000000000000e+01 5.575000000000000000e+01
2.200000000000000000e+01 7.429461538461536065e+02 3.637884216308593750e+02 2.428314208984375000e+00 0.000000000000000000e+00 0.000000000000000000e+00 2.639497802734375000e+03 3.455502748489379883e+00 5.000000000000000000e+00 3.000000000000000000e+00 2.093105773925781250e+02 3.575000000000000000e+01 5.575000000000000000e+01
1.900000000000000000e+01 7.245769230769227534e+02 3.728866577148437500e+02 2.470855712890625000e+00 0.000000000000000000e+00 2.352941185235977173e-01 2.653898681640625000e+03 3.476777553558349609e+00 5.000000000000000000e+00 1.000000000000000000e+00 2.104065399169921875e+02 3.625000000000000000e+01 5.575000000000000000e+01
3.100000000000000000e+01 7.176076923076924459e+02 3.800448608398437500e+02 2.513397216796875000e+00 0.000000000000000000e+00 2.941176593303680420e-01 2.668299804687500000e+03 3.498313188552856445e+00 5.000000000000000000e+00 3.000000000000000000e+00 2.037430267333984375e+02 3.675000000000000000e+01 5.575000000000000000e+01
3.100000000000000000e+01 6.646615384615383846e+02 3.815458984375000000e+02 2.711425781250000000e+00 0.000000000000000000e+00 2.352941185235977173e-01 2.717116455078125000e+03 3.529586315155029297e+00 5.000000000000000000e+00 3.000000000000000000e+00 1.414339599609375000e+02 3.825000000000000000e+01 5.575000000000000000e+01
2.800000000000000000e+01 6.045769230769229807e+02 3.501765747070312500e+02 2.890380859375000000e+00 0.000000000000000000e+00 5.882353186607360840e-01 2.753403564453125000e+03 3.530740022659301758e+00 5.000000000000000000e+00 3.000000000000000000e+00 1.273995056152343750e+02 3.925000000000000000e+01 5.575000000000000000e+01
2.800000000000000000e+01 5.863615384615387711e+02 3.348977050781250000e+02 2.907012939453125000e+00 0.000000000000000000e+00 0.000000000000000000e+00 2.758828613281250000e+03 3.536697387695312500e+00 5.000000000000000000e+00 3.000000000000000000e+00 1.348472290039062500e+02 3.975000000000000000e+01 5.575000000000000000e+01
2.100000000000000000e+01 5.860384615384614335e+02 3.274940795898437500e+02 2.899383544921875000e+00 0.000000000000000000e+00 6.470588445663452148e-01 2.760013916015625000e+03 3.539960861206054688e+00 1.500000000000000000e+01 3.000000000000000000e+00 1.330545654296875000e+02 4.025000000000000000e+01 5.575000000000000000e+01
6.200000000000000000e+01 5.930846153846156312e+02 3.280605468750000000e+02 2.891723632812500000e+00 0.000000000000000000e+00 0.000000000000000000e+00 2.761199218750000000e+03 3.539551734924316406e+00 5.000000000000000000e+00 4.000000000000000000e+00 1.394352722167968750e+02 4.075000000000000000e+01 5.575000000000000000e+01
5.000000000000000000e+00 6.247230769230770875e+02 3.429080200195312500e+02 2.655517578125000000e+00 0.000000000000000000e+00 0.000000000000000000e+00 2.735120117187500000e+03 3.538478851318359375e+00 5.000000000000000000e+00 1.000000000000000000e+00 8.963477325439453125e+01 4.225000000000000000e+01 5.575000000000000000e+01
2.300000000000000000e+01 6.588076923076922640e+02 3.507274475097656250e+02 2.416473388671875000e+00 0.000000000000000000e+00 1.058823585510253906e+00 2.707574462890625000e+03 3.518220186233520508e+00 5.000000000000000000e+00 3.000000000000000000e+00 1.576955718994140625e+02 4.325000000000000000e+01 5.575000000000000000e+01
5.700000000000000000e+01 6.520769230769230944e+02 3.504769592285156250e+02 2.260162353515625000e+00 0.000000000000000000e+00 5.294117927551269531e-01 2.692816406250000000e+03 3.523289442062377930e+00 5.000000000000000000e+00 4.000000000000000000e+00 1.677914428710937500e+02 4.375000000000000000e+01 5.575000000000000000e+01
2.000000000000000000e+00 5.752230769230772012e+02 2.862978210449218750e+02 1.567993164062500000e+00 0.000000000000000000e+00 1.176470637321472168e+00 2.679822998046875000e+03 3.581908226013183594e+00 5.000000000000000000e+00 1.000000000000000000e+00 7.982432556152343750e+01 4.975000000000000000e+01 5.575000000000000000e+01
1.000000000000000000e+00 5.732769230769231399e+02 2.889307861328125000e+02 1.577880859375000000e+00 0.000000000000000000e+00 2.941176593303680420e-01 2.681965820312500000e+03 3.550550699234008789e+00 5.000000000000000000e+00 1.000000000000000000e+00 1.422375335693359375e+02 5.025000000000000000e+01 5.575000000000000000e+01
2.900000000000000000e+01 5.692769230769231399e+02 2.960820312500000000e+02 1.550415039062500000e+00 0.000000000000000000e+00 4.705882370471954346e-01 2.662194824218750000e+03 3.539501667022705078e+00 8.000000000000000000e+00 3.000000000000000000e+00 1.427646942138671875e+02 5.125000000000000000e+01 5.575000000000000000e+01
3.000000000000000000e+00 5.671999999999999318e+02 2.998106384277343750e+02 1.522552490234375000e+00 0.000000000000000000e+00 1.647058844566345215e+00 2.645092041015625000e+03 3.539841890335083008e+00 8.000000000000000000e+00 1.000000000000000000e+00 1.757770233154296875e+02 5.175000000000000000e+01 5.575000000000000000e+01
8.000000000000000000e+00 5.609461538461541750e+02 2.993664550781250000e+02 1.494689941406250000e+00 0.000000000000000000e+00 9.411764740943908691e-01 2.627989501953125000e+03 3.529870033264160156e+00 5.000000000000000000e+00 1.000000000000000000e+00 9.696598052978515625e+01 5.225000000000000000e+01 5.575000000000000000e+01
1.200000000000000000e+01 5.778461538461535838e+02 2.749252624511718750e+02 2.761230468750000000e-01 0.000000000000000000e+00 0.000000000000000000e+00 2.358984863281250000e+03 3.203501224517822266e+00 5.000000000000000000e+00 1.000000000000000000e+00 2.681890869140625000e+02 5.675000000000000000e+01 5.575000000000000000e+01
6.400000000000000000e+01 5.802461538461543569e+02 2.707473144531250000e+02 1.863708496093750000e-01 0.000000000000000000e+00 0.000000000000000000e+00 2.345183593750000000e+03 3.212478160858154297e+00 5.000000000000000000e+00 4.000000000000000000e+00 3.481006469726562500e+02 5.725000000000000000e+01 5.575000000000000000e+01
6.300000000000000000e+01 5.864769230769229580e+02 2.644736633300781250e+02 9.664916992187500000e-02 0.000000000000000000e+00 0.000000000000000000e+00 2.331382324218750000e+03 3.304807901382446289e+00 5.000000000000000000e+00 4.000000000000000000e+00 4.495975952148437500e+02 5.775000000000000000e+01 5.575000000000000000e+01
1.400000000000000000e+01 5.902538461538457568e+02 2.752911376953125000e+02 6.201171875000000000e-02 0.000000000000000000e+00 8.823529481887817383e-01 2.340685058593750000e+03 3.297256469726562500e+00 5.000000000000000000e+00 1.000000000000000000e+00 2.557078552246093750e+02 5.875000000000000000e+01 5.575000000000000000e+01
2.300000000000000000e+01 5.962230769230766327e+02 2.855300292968750000e+02 8.813476562500000000e-02 0.000000000000000000e+00 0.000000000000000000e+00 2.356407958984375000e+03 2.318139314651489258e+00 5.000000000000000000e+00 3.000000000000000000e+00 3.568796386718750000e+02 5.925000000000000000e+01 5.575000000000000000e+01
1.200000000000000000e+01 5.936461538461536520e+02 2.938711242675781250e+02 1.142578125000000000e-01 0.000000000000000000e+00 0.000000000000000000e+00 2.372131103515625000e+03 1.858095765113830566e+00 1.300000000000000000e+01 1.000000000000000000e+00 4.022795715332031250e+02 5.975000000000000000e+01 5.575000000000000000e+01
5.700000000000000000e+01 5.636230769230767237e+02 2.888214721679687500e+02 1.859130859375000000e-01 0.000000000000000000e+00 0.000000000000000000e+00 2.398249023437500000e+03 8.730442523956298828e-01 1.300000000000000000e+01 4.000000000000000000e+00 4.237033386230468750e+02 6.025000000000000000e+01 5.575000000000000000e+01
7.000000000000000000e+00 4.806153846153847553e+02 2.484653320312500000e+02 5.375366210937500000e-01 0.000000000000000000e+00 4.117647111415863037e-01 2.507787841796875000e+03 3.403270006179809570e+00 4.000000000000000000e+00 1.000000000000000000e+00 1.695072174072265625e+02 6.175000000000000000e+01 5.575000000000000000e+01
1.500000000000000000e+01 4.749923076923076906e+02 2.248060150146484375e+02 7.950439453125000000e-01 0.000000000000000000e+00 1.235294103622436523e+00 2.586432617187500000e+03 3.478887796401977539e+00 8.000000000000000000e+00 1.000000000000000000e+00 1.482505798339843750e+02 6.325000000000000000e+01 5.575000000000000000e+01
2.300000000000000000e+01 4.737076923076926391e+02 2.234702758789062500e+02 8.780212402343750000e-01 0.000000000000000000e+00 1.941176414489746094e+00 2.611711425781250000e+03 3.482593774795532227e+00 4.000000000000000000e+00 3.000000000000000000e+00 1.472206268310546875e+02 6.375000000000000000e+01 5.575000000000000000e+01
5.000000000000000000e+00 4.573923076923077815e+02 2.179678344726562500e+02 8.460388183593750000e-01 0.000000000000000000e+00 1.529411792755126953e+00 2.617668701171875000e+03 3.477044105529785156e+00 8.000000000000000000e+00 1.000000000000000000e+00 1.050799942016601562e+02 6.425000000000000000e+01 5.575000000000000000e+01
3.700000000000000000e+01 4.442076923076924118e+02 2.114480285644531250e+02 8.140258789062500000e-01 0.000000000000000000e+00 1.529411792755126953e+00 2.623625976562500000e+03 3.472503185272216797e+00 8.000000000000000000e+00 3.000000000000000000e+00 1.498819580078125000e+02 6.475000000000000000e+01 5.575000000000000000e+01
1.300000000000000000e+01 4.322923076923077019e+02 2.059377899169921875e+02 7.820434570312500000e-01 0.000000000000000000e+00 2.117647171020507812e+00 2.629583007812500000e+03 3.464020729064941406e+00 4.000000000000000000e+00 1.000000000000000000e+00 1.392074127197265625e+02 6.525000000000000000e+01 5.575000000000000000e+01
1.200000000000000000e+01 4.205615384615382482e+02 2.006166076660156250e+02 7.326354980468750000e-01 0.000000000000000000e+00 1.411764740943908691e+00 2.631375732421875000e+03 3.452080011367797852e+00 4.000000000000000000e+00 1.000000000000000000e+00 9.173625946044921875e+01 6.575000000000000000e+01 5.575000000000000000e+01
1.000000000000000000e+01 3.920923076923076565e+02 1.854173736572265625e+02 3.503723144531250000e-01 0.000000000000000000e+00 5.294117927551269531e-01 2.590333496093750000e+03 3.400354623794555664e+00 4.000000000000000000e+00 1.000000000000000000e+00 1.341020050048828125e+02 6.775000000000000000e+01 5.575000000000000000e+01
1.600000000000000000e+01 7.665769230769227534e+02 3.622132263183593750e+02 2.437347412109375000e+00 0.000000000000000000e+00 0.000000000000000000e+00 2.599209472656250000e+03 3.366489887237548828e+00 5.000000000000000000e+00 1.000000000000000000e+00 2.352922821044921875e+02 3.325000000000000000e+01 5.625000000000000000e+01
7.000000000000000000e+00 7.383076923076920366e+02 3.635465393066406250e+02 2.216278076171875000e+00 0.000000000000000000e+00 3.529411852359771729e-01 2.578403808593750000e+03 2.915880203247070312e+00 5.000000000000000000e+00 1.000000000000000000e+00 1.840216979980468750e+02 3.525000000000000000e+01 5.625000000000000000e+01
6.300000000000000000e+01 7.125307692307693515e+02 3.736981506347656250e+02 2.236999511718750000e+00 0.000000000000000000e+00 5.294117927551269531e-01 2.594586425781250000e+03 3.454945564270019531e+00 5.000000000000000000e+00 4.000000000000000000e+00 1.913360748291015625e+02 3.625000000000000000e+01 5.625000000000000000e+01
4.900000000000000000e+01 7.232076923076919002e+02 3.798663330078125000e+02 2.273101806640625000e+00 0.000000000000000000e+00 2.941176593303680420e-01 2.607883056640625000e+03 3.457196474075317383e+00 5.000000000000000000e+00 4.000000000000000000e+00 2.089879302978515625e+02 3.675000000000000000e+01 5.625000000000000000e+01
6.000000000000000000e+00 7.083076923076920366e+02 3.844695129394531250e+02 2.309173583984375000e+00 0.000000000000000000e+00 8.823529481887817383e-01 2.621179931640625000e+03 3.470730781555175781e+00 5.000000000000000000e+00 1.000000000000000000e+00 2.199314880371093750e+02 3.725000000000000000e+01 5.625000000000000000e+01
2.500000000000000000e+01 6.922230769230772012e+02 3.840636901855468750e+02 2.380493164062500000e+00 0.000000000000000000e+00 0.000000000000000000e+00 2.638226806640625000e+03 3.478799104690551758e+00 5.000000000000000000e+00 3.000000000000000000e+00 2.056676177978515625e+02 3.775000000000000000e+01 5.625000000000000000e+01
1.900000000000000000e+01 6.779692307692307622e+02 3.770984191894531250e+02 2.487030029296875000e+00 0.000000000000000000e+00 5.882353186607360840e-01 2.659023437500000000e+03 3.478904485702514648e+00 5.000000000000000000e+00 1.000000000000000000e+00 2.161219177246093750e+02 3.825000000000000000e+01 5.625000000000000000e+01
2.100000000000000000e+01 6.446230769230768374e+02 3.618907775878906250e+02 2.593566894531250000e+00 0.000000000000000000e+00 3.529411852359771729e-01 2.679820312500000000e+03 3.480133771896362305e+00 5.000000000000000000e+00 3.000000000000000000e+00 1.662014770507812500e+02 3.875000000000000000e+01 5.625000000000000000e+01
5.800000000000000000e+01 6.241692307692305803e+02 3.420175170898437500e+02 2.700103759765625000e+00 0.000000000000000000e+00 0.000000000000000000e+00 2.700617187500000000e+03 3.475935935974121094e+00 5.000000000000000000e+00 4.000000000000000000e+00 1.971118621826171875e+02 3.925000000000000000e+01 5.625000000000000000e+01
1.100000000000000000e+01 5.928153846153845734e+02 3.220270690917968750e+02 2.745727539062500000e+00 0.000000000000000000e+00 5.294117927551269531e-01 2.716503173828125000e+03 3.512515068054199219e+00 5.000000000000000000e+00 1.000000000000000000e+00 1.035050125122070312e+02 4.075000000000000000e+01 5.625000000000000000e+01
4.100000000000000000e+01 5.966461538461539931e+02 3.240190734863281250e+02 2.752624511718750000e+00 0.000000000000000000e+00 5.294117927551269531e-01 2.720389160156250000e+03 3.518825054168701172e+00 5.000000000000000000e+00 3.000000000000000000e+00 1.336324920654296875e+02 4.125000000000000000e+01 5.625000000000000000e+01
5.400000000000000000e+01 6.066000000000000227e+02 3.286668395996093750e+02 2.648590087890625000e+00 0.000000000000000000e+00 0.000000000000000000e+00 2.707881591796875000e+03 3.518601179122924805e+00 5.000000000000000000e+00 4.000000000000000000e+00 1.262442016601562500e+02 4.175000000000000000e+01 5.625000000000000000e+01
2.400000000000000000e+01 6.178923076923075541e+02 3.388209533691406250e+02 2.544525146484375000e+00 0.000000000000000000e+00 9.411764740943908691e-01 2.695373779296875000e+03 3.524540424346923828e+00 5.000000000000000000e+00 3.000000000000000000e+00 9.479887390136718750e+01 4.225000000000000000e+01 5.625000000000000000e+01
5.600000000000000000e+01 6.158692307692309669e+02 3.510410461425781250e+02 2.440490722656250000e+00 0.000000000000000000e+00 6.470588445663452148e-01 2.682865966796875000e+03 3.530601501464843750e+00 5.000000000000000000e+00 4.000000000000000000e+00 8.370264434814453125e+01 4.275000000000000000e+01 5.625000000000000000e+01
5.200000000000000000e+01 6.181230769230767237e+02 3.663692016601562500e+02 1.995239257812500000e+00 0.000000000000000000e+00 6.470588445663452148e-01 2.636957031250000000e+03 3.545485496520996094e+00 5.000000000000000000e+00 4.000000000000000000e+00 7.116954803466796875e+01 4.425000000000000000e+01 5.625000000000000000e+01
3.300000000000000000e+01 5.993538461538463480e+02 3.577776489257812500e+02 1.832061767578125000e+00 0.000000000000000000e+00 8.235294222831726074e-01 2.620722167968750000e+03 3.560106039047241211e+00 5.000000000000000000e+00 3.000000000000000000e+00 8.462583923339843750e+01 4.475000000000000000e+01 5.625000000000000000e+01
2.100000000000000000e+01 5.835538461538459387e+02 3.432364196777343750e+02 1.702270507812500000e+00 0.000000000000000000e+00 5.294117927551269531e-01 2.609269531250000000e+03 3.564818859100341797e+00 5.000000000000000000e+00 3.000000000000000000e+00 9.329295349121093750e+01 4.525000000000000000e+01 5.625000000000000000e+01
4.300000000000000000e+01 5.689846153846154948e+02 3.262550354003906250e+02 1.605926513671875000e+00 0.000000000000000000e+00 8.235294222831726074e-01 2.602598876953125000e+03 3.569703340530395508e+00 5.000000000000000000e+00 3.000000000000000000e+00 9.313710021972656250e+01 4.575000000000000000e+01 5.625000000000000000e+01
4.700000000000000000e+01 5.709307692307692150e+02 3.066261291503906250e+02 1.364562988281250000e+00 0.000000000000000000e+00 5.294117927551269531e-01 2.589356689453125000e+03 3.560575723648071289e+00 5.000000000000000000e+00 4.000000000000000000e+00 1.032450180053710938e+02 4.725000000000000000e+01 5.625000000000000000e+01
4.200000000000000000e+01 5.700076923076923094e+02 3.041604614257812500e+02 1.331817626953125000e+00 0.000000000000000000e+00 5.882353186607360840e-01 2.591712646484375000e+03 3.342723131179809570e+00 5.000000000000000000e+00 3.000000000000000000e+00 9.298488616943359375e+01 4.775000000000000000e+01 5.625000000000000000e+01
4.800000000000000000e+01 5.751230769230768374e+02 2.986727600097656250e+02 1.299072265625000000e+00 0.000000000000000000e+00 5.294117927551269531e-01 2.594068603515625000e+03 3.185789108276367188e+00 5.000000000000000000e+00 4.000000000000000000e+00 1.222239074707031250e+02 4.825000000000000000e+01 5.625000000000000000e+01
4.100000000000000000e+01 5.966384615384612289e+02 2.951004333496093750e+02 1.266326904296875000e+00 0.000000000000000000e+00 5.294117927551269531e-01 2.596424560546875000e+03 3.198471546173095703e+00 5.000000000000000000e+00 3.000000000000000000e+00 1.145263519287109375e+02 4.875000000000000000e+01 5.625000000000000000e+01
7.000000000000000000e+00 5.826999999999999318e+02 2.988039245605468750e+02 1.271881103515625000e+00 0.000000000000000000e+00 9.411764740943908691e-01 2.598253173828125000e+03 3.507935762405395508e+00 5.000000000000000000e+00 1.000000000000000000e+00 1.815212707519531250e+02 5.025000000000000000e+01 5.625000000000000000e+01
5.000000000000000000e+00 5.558076923076922640e+02 2.816036376953125000e+02 1.128570556640625000e+00 0.000000000000000000e+00 0.000000000000000000e+00 2.505374755859375000e+03 3.490878105163574219e+00 5.000000000000000000e+00 1.000000000000000000e+00 1.060166778564453125e+02 5.325000000000000000e+01 5.625000000000000000e+01
6.300000000000000000e+01 5.814769230769234127e+02 2.823215026855468750e+02 3.380432128906250000e-01 0.000000000000000000e+00 2.941176593303680420e-01 2.335613037109375000e+03 3.438936710357666016e+00 5.000000000000000000e+00 4.000000000000000000e+00 1.400018463134765625e+02 5.625000000000000000e+01 5.625000000000000000e+01
2.800000000000000000e+01 5.890846153846154039e+02 2.725719604492187500e+02 2.409362792968750000e-01 0.000000000000000000e+00 0.000000000000000000e+00 2.322615722656250000e+03 3.396638631820678711e+00 5.000000000000000000e+00 3.000000000000000000e+00 2.047823486328125000e+02 5.675000000000000000e+01 5.625000000000000000e+01
5.100000000000000000e+01 5.995923076923074859e+02 2.803668823242187500e+02 1.438293457031250000e-01 0.000000000000000000e+00 0.000000000000000000e+00 2.309618164062500000e+03 3.242974996566772461e+00 5.000000000000000000e+00 4.000000000000000000e+00 3.235385742187500000e+02 5.725000000000000000e+01 5.625000000000000000e+01
6.400000000000000000e+01 6.054461538461539476e+02 2.869165954589843750e+02 4.672241210937500000e-02 0.000000000000000000e+00 0.000000000000000000e+00 2.296620605468750000e+03 3.061486959457397461e+00 5.000000000000000000e+00 4.000000000000000000e+00 2.876246337890625000e+02 5.775000000000000000e+01 5.625000000000000000e+01
5.200000000000000000e+01 6.201000000000000227e+02 3.002133789062500000e+02 6.103515625000000000e-04 0.000000000000000000e+00 0.000000000000000000e+00 2.315013671875000000e+03 1.527811527252197266e+00 5.000000000000000000e+00 4.000000000000000000e+00 3.405415954589843750e+02 5.925000000000000000e+01 5.625000000000000000e+01
6.700000000000000000e+01 6.083230769230769965e+02 3.049009094238281250e+02 1.248168945312500000e-02 0.000000000000000000e+00 0.000000000000000000e+00 2.327520996093750000e+03 1.035027861595153809e+00 1.300000000000000000e+01 4.000000000000000000e+00 4.203291625976562500e+02 5.975000000000000000e+01 5.625000000000000000e+01
5.000000000000000000e+01 5.889692307692309896e+02 3.015850524902343750e+02 7.202148437500000000e-02 0.000000000000000000e+00 0.000000000000000000e+00 2.350319335937500000e+03 8.497921824455261230e-01 1.300000000000000000e+01 4.000000000000000000e+00 3.990803833007812500e+02 6.025000000000000000e+01 5.625000000000000000e+01
5.000000000000000000e+01 5.416923076923077360e+02 2.907702331542968750e+02 1.791992187500000000e-01 0.000000000000000000e+00 0.000000000000000000e+00 2.383408935546875000e+03 2.515938282012939453e+00 5.000000000000000000e+00 4.000000000000000000e+00 2.954912719726562500e+02 6.075000000000000000e+01 5.625000000000000000e+01
1.300000000000000000e+01 5.075230769230769283e+02 2.647938842773437500e+02 3.936157226562500000e-01 0.000000000000000000e+00 5.882353186607360840e-01 2.449588134765625000e+03 2.189954042434692383e+00 4.000000000000000000e+00 1.000000000000000000e+00 1.724181976318359375e+02 6.175000000000000000e+01 5.625000000000000000e+01
6.000000000000000000e+00 5.016615384615384414e+02 2.480457305908203125e+02 5.545654296875000000e-01 0.000000000000000000e+00 8.235294222831726074e-01 2.498775146484375000e+03 3.436388254165649414e+00 8.000000000000000000e+00 1.000000000000000000e+00 1.114876251220703125e+02 6.275000000000000000e+01 5.625000000000000000e+01
2.100000000000000000e+01 4.818846153846153584e+02 2.371450805664062500e+02 6.815795898437500000e-01 0.000000000000000000e+00 0.000000000000000000e+00 2.554274902343750000e+03 3.432908058166503906e+00 8.000000000000000000e+00 3.000000000000000000e+00 1.325026245117187500e+02 6.425000000000000000e+01 5.625000000000000000e+01
6.000000000000000000e+00 4.702230769230770306e+02 2.294865112304687500e+02 6.553039550781250000e-01 0.000000000000000000e+00 2.058823585510253906e+00 2.563015380859375000e+03 3.431051492691040039e+00 8.000000000000000000e+00 1.000000000000000000e+00 6.704927825927734375e+01 6.475000000000000000e+01 5.625000000000000000e+01
4.300000000000000000e+01 4.604538461538461434e+02 2.232852935791015625e+02 6.290283203125000000e-01 0.000000000000000000e+00 1.000000000000000000e+00 2.571755615234375000e+03 3.423685073852539062e+00 5.000000000000000000e+00 3.000000000000000000e+00 1.345516967773437500e+02 6.525000000000000000e+01 5.625000000000000000e+01
1.700000000000000000e+01 4.444384615384615813e+02 2.194146118164062500e+02 5.865173339843750000e-01 0.000000000000000000e+00 1.764705896377563477e+00 2.576464355468750000e+03 3.422708988189697266e+00 5.000000000000000000e+00 1.000000000000000000e+00 7.059568786621093750e+01 6.575000000000000000e+01 5.625000000000000000e+01
4.200000000000000000e+01 7.858307692307693060e+02 3.744849243164062500e+02 2.439697265625000000e+00 0.000000000000000000e+00 0.000000000000000000e+00 2.589510009765625000e+03 3.327394962310791016e+00 5.000000000000000000e+00 3.000000000000000000e+00 2.663472290039062500e+02 3.325000000000000000e+01 5.675000000000000000e+01
5.800000000000000000e+01 7.718076923076926050e+02 3.737247924804687500e+02 2.289886474609375000e+00 0.000000000000000000e+00 0.000000000000000000e+00 2.562864990234375000e+03 3.332325935363769531e+00 5.000000000000000000e+00 4.000000000000000000e+00 2.242115325927734375e+02 3.375000000000000000e+01 5.675000000000000000e+01
4.900000000000000000e+01 7.799076923076926278e+02 3.725469055175781250e+02 2.229705810546875000e+00 0.000000000000000000e+00 0.000000000000000000e+00 2.558752441406250000e+03 3.348734378814697266e+00 5.000000000000000000e+00 4.000000000000000000e+00 2.472279968261718750e+02 3.425000000000000000e+01 5.675000000000000000e+01
5.000000000000000000e+01 7.459307692307694424e+02 3.704930114746093750e+02 2.169525146484375000e+00 0.000000000000000000e+00 0.000000000000000000e+00 2.554640136718750000e+03 3.377924442291259766e+00 5.000000000000000000e+00 4.000000000000000000e+00 2.062480773925781250e+02 3.475000000000000000e+01 5.675000000000000000e+01
5.600000000000000000e+01 7.017153846153846644e+02 3.684086608886718750e+02 2.064331054687500000e+00 0.000000000000000000e+00 1.117647051811218262e+00 2.548994140625000000e+03 3.420962572097778320e+00 5.000000000000000000e+00 4.000000000000000000e+00 1.395216217041015625e+02 3.575000000000000000e+01 5.675000000000000000e+01
1.000000000000000000e+01 6.521538461538461888e+02 3.696746520996093750e+02 2.065948486328125000e+00 0.000000000000000000e+00 1.764705926179885864e-01 2.567604736328125000e+03 3.466898918151855469e+00 5.000000000000000000e+00 1.000000000000000000e+00 1.227999954223632812e+02 3.725000000000000000e+01 5.675000000000000000e+01
3.000000000000000000e+01 6.349307692307689877e+02 3.530241088867187500e+02 2.178100585937500000e+00 0.000000000000000000e+00 2.941176593303680420e-01 2.595942871093750000e+03 3.455063104629516602e+00 5.000000000000000000e+00 3.000000000000000000e+00 1.351334228515625000e+02 3.825000000000000000e+01 5.675000000000000000e+01
6.000000000000000000e+01 6.114923076923078042e+02 3.174425048828125000e+02 2.353057861328125000e+00 0.000000000000000000e+00 0.000000000000000000e+00 2.636728271484375000e+03 3.451181173324584961e+00 5.000000000000000000e+00 4.000000000000000000e+00 1.262282867431640625e+02 3.975000000000000000e+01 5.675000000000000000e+01
6.100000000000000000e+01 5.882153846153846644e+02 3.185919799804687500e+02 2.371948242187500000e+00 0.000000000000000000e+00 7.647058963775634766e-01 2.644544433593750000e+03 3.484899044036865234e+00 5.000000000000000000e+00 4.000000000000000000e+00 1.257987442016601562e+02 4.075000000000000000e+01 5.675000000000000000e+01
3.100000000000000000e+01 5.854384615384617518e+02 3.187780151367187500e+02 2.381378173828125000e+00 0.000000000000000000e+00 0.000000000000000000e+00 2.648452636718750000e+03 3.493711471557617188e+00 5.000000000000000000e+00 3.000000000000000000e+00 1.276579513549804688e+02 4.125000000000000000e+01 5.675000000000000000e+01
6.400000000000000000e+01 5.984846153846151537e+02 3.202359619140625000e+02 2.298614501953125000e+00 0.000000000000000000e+00 5.882352963089942932e-02 2.638948486328125000e+03 3.493863582611083984e+00 5.000000000000000000e+00 4.000000000000000000e+00 1.144354400634765625e+02 4.175000000000000000e+01 5.675000000000000000e+01
3.500000000000000000e+01 6.090692307692310123e+02 3.261117858886718750e+02 2.215820312500000000e+00 0.000000000000000000e+00 0.000000000000000000e+00 2.629444580078125000e+03 3.490066528320312500e+00 5.000000000000000000e+00 3.000000000000000000e+00 9.682458496093750000e+01 4.225000000000000000e+01 5.675000000000000000e+01
1.000000000000000000e+01 6.189230769230773603e+02 3.365926208496093750e+02 2.133056640625000000e+00 0.000000000000000000e+00 0.000000000000000000e+00 2.619940673828125000e+03 3.486674547195434570e+00 5.000000000000000000e+00 1.000000000000000000e+00 1.410707550048828125e+02 4.275000000000000000e+01 5.675000000000000000e+01
6.000000000000000000e+01 6.226230769230769511e+02 3.556287536621093750e+02 1.889862060546875000e+00 0.000000000000000000e+00 3.529411852359771729e-01 2.594357910156250000e+03 3.486114025115966797e+00 5.000000000000000000e+00 4.000000000000000000e+00 1.260701065063476562e+02 4.375000000000000000e+01 5.675000000000000000e+01
6.600000000000000000e+01 6.023461538461540385e+02 3.542673950195312500e+02 1.600067138671875000e+00 0.000000000000000000e+00 2.352941185235977173e-01 2.564830322265625000e+03 3.522106170654296875e+00 5.000000000000000000e+00 4.000000000000000000e+00 1.103767776489257812e+02 4.475000000000000000e+01 5.675000000000000000e+01
1.000000000000000000e+01 5.905076923076924231e+02 3.441477966308593750e+02 1.484558105468750000e+00 0.000000000000000000e+00 0.000000000000000000e+00 2.554042236328125000e+03 3.533853292465209961e+00 5.000000000000000000e+00 1.000000000000000000e+00 1.112752227783203125e+02 4.525000000000000000e+01 5.675000000000000000e+01
2.500000000000000000e+01 5.780846153846151765e+02 3.316989440917968750e+02 1.398376464843750000e+00 0.000000000000000000e+00 5.882352963089942932e-02 2.547229736328125000e+03 3.541787147521972656e+00 5.000000000000000000e+00 3.000000000000000000e+00 7.976114654541015625e+01 4.575000000000000000e+01 5.675000000000000000e+01
3.200000000000000000e+01 5.748000000000000682e+02 3.226628417968750000e+02 1.312225341796875000e+00 0.000000000000000000e+00 5.294117927551269531e-01 2.540417480468750000e+03 3.547805070877075195e+00 5.000000000000000000e+00 3.000000000000000000e+00 1.150281448364257812e+02 4.625000000000000000e+01 5.675000000000000000e+01
2.800000000000000000e+01 5.790000000000004547e+02 3.181350708007812500e+02 1.226043701171875000e+00 0.000000000000000000e+00 5.294117927551269531e-01 2.533604980468750000e+03 3.547938108444213867e+00 1.500000000000000000e+01 3.000000000000000000e+00 1.158092193603515625e+02 4.675000000000000000e+01 5.675000000000000000e+01
5.000000000000000000e+01 5.770230769230769283e+02 3.162240905761718750e+02 1.184112548828125000e+00 0.000000000000000000e+00 0.000000000000000000e+00 2.532957031250000000e+03 3.263643264770507812e+00 5.000000000000000000e+00 4.000000000000000000e+00 8.642375946044921875e+01 4.725000000000000000e+01 5.675000000000000000e+01
6.100000000000000000e+01 5.833230769230767692e+02 3.149419555664062500e+02 1.156921386718750000e+00 0.000000000000000000e+00 2.941176593303680420e-01 2.534364013671875000e+03 3.093884706497192383e+00 5.000000000000000000e+00 4.000000000000000000e+00 1.032121963500976562e+02 4.775000000000000000e+01 5.675000000000000000e+01
2.000000000000000000e+00 5.684307692307692150e+02 3.031507263183593750e+02 1.134490966796875000e+00 0.000000000000000000e+00 2.941176593303680420e-01 2.517114013671875000e+03 2.487710714340209961e+00 5.000000000000000000e+00 1.000000000000000000e+00 1.282048187255859375e+02 5.175000000000000000e+01 5.675000000000000000e+01
1.300000000000000000e+01 5.685384615384612061e+02 2.813457946777343750e+02 8.930664062500000000e-01 0.000000000000000000e+00 0.000000000000000000e+00 2.434491699218750000e+03 3.097010612487792969e+00 5.000000000000000000e+00 1.000000000000000000e+00 1.018806228637695312e+02 5.375000000000000000e+01 5.675000000000000000e+01
5.500000000000000000e+01 5.681769230769231172e+02 2.812767028808593750e+02 7.998046875000000000e-01 0.000000000000000000e+00 0.000000000000000000e+00 2.408420654296875000e+03 3.450668334960937500e+00 5.000000000000000000e+00 4.000000000000000000e+00 1.296864624023437500e+02 5.425000000000000000e+01 5.675000000000000000e+01
4.100000000000000000e+01 5.815384615384614335e+02 2.852249755859375000e+02 4.978637695312500000e-01 0.000000000000000000e+00 0.000000000000000000e+00 2.354648681640625000e+03 3.408915758132934570e+00 5.000000000000000000e+00 3.000000000000000000e+00 2.194896697998046875e+02 5.525000000000000000e+01 5.675000000000000000e+01
3.200000000000000000e+01 6.105307692307691241e+02 3.104848327636718750e+02 1.794433593750000000e-01 0.000000000000000000e+00 0.000000000000000000e+00 2.300643798828125000e+03 3.367198467254638672e+00 5.000000000000000000e+00 3.000000000000000000e+00 2.514334716796875000e+02 5.625000000000000000e+01 5.675000000000000000e+01
1.000000000000000000e+01 6.140615384615382482e+02 3.114790344238281250e+02 6.854248046875000000e-02 0.000000000000000000e+00 0.000000000000000000e+00 2.287507080078125000e+03 3.339667081832885742e+00 5.000000000000000000e+00 1.000000000000000000e+00 2.002566528320312500e+02 5.675000000000000000e+01 5.675000000000000000e+01
1.700000000000000000e+01 6.252538461538463253e+02 3.162275390625000000e+02 -4.235839843750000000e-02 0.000000000000000000e+00 1.058823585510253906e+00 2.274370117187500000e+03 3.290339946746826172e+00 5.000000000000000000e+00 1.000000000000000000e+00 3.400082397460937500e+02 5.725000000000000000e+01 5.675000000000000000e+01
1.100000000000000000e+01 6.210307692307692378e+02 3.252105712890625000e+02 -1.532592773437500000e-01 0.000000000000000000e+00 8.235294222831726074e-01 2.261233154296875000e+03 3.266668319702148438e+00 5.000000000000000000e+00 1.000000000000000000e+00 2.728494567871093750e+02 5.775000000000000000e+01 5.675000000000000000e+01
3.200000000000000000e+01 6.305307692307694651e+02 3.341448974609375000e+02 -2.370300292968750000e-01 0.000000000000000000e+00 2.941176593303680420e-01 2.254027099609375000e+03 2.298339843750000000e+00 5.000000000000000000e+00 3.000000000000000000e+00 2.895123596191406250e+02 5.825000000000000000e+01 5.675000000000000000e+01
5.400000000000000000e+01 6.463153846153846871e+02 3.237856140136718750e+02 -2.418518066406250000e-01 0.000000000000000000e+00 5.882352963089942932e-02 2.275198974609375000e+03 2.063480615615844727e+00 5.000000000000000000e+00 4.000000000000000000e+00 4.692001647949218750e+02 5.925000000000000000e+01 5.675000000000000000e+01
6.300000000000000000e+01 6.323999999999998636e+02 3.054267272949218750e+02 -2.442932128906250000e-01 0.000000000000000000e+00 0.000000000000000000e+00 2.285784912109375000e+03 9.609450101852416992e-01 1.300000000000000000e+01 4.000000000000000000e+00 4.231441955566406250e+02 5.975000000000000000e+01 5.675000000000000000e+01
5.800000000000000000e+01 6.074769230769229580e+02 2.888665161132812500e+02 -1.986083984375000000e-01 0.000000000000000000e+00 0.000000000000000000e+00 2.305606201171875000e+03 1.605364084243774414e+00 1.300000000000000000e+01 4.000000000000000000e+00 3.243153991699218750e+02 6.025000000000000000e+01 5.675000000000000000e+01
4.200000000000000000e+01 5.330769230769229807e+02 2.751593017578125000e+02 -1.116943359375000000e-02 0.000000000000000000e+00 0.000000000000000000e+00 2.363719482421875000e+03 2.114182949066162109e+00 5.000000000000000000e+00 3.000000000000000000e+00 2.454272613525390625e+02 6.125000000000000000e+01 5.675000000000000000e+01
3.700000000000000000e+01 5.236461538461536520e+02 2.683359985351562500e+02 8.258056640625000000e-02 0.000000000000000000e+00 2.352941185235977173e-01 2.392776123046875000e+03 2.163719654083251953e+00 4.000000000000000000e+00 3.000000000000000000e+00 2.091271362304687500e+02 6.175000000000000000e+01 5.675000000000000000e+01
4.400000000000000000e+01 5.167769230769229125e+02 2.582245178222656250e+02 1.641235351562500000e-01 0.000000000000000000e+00 8.235294222831726074e-01 2.416334472656250000e+03 2.417433500289916992e+00 4.000000000000000000e+00 3.000000000000000000e+00 1.389062957763671875e+02 6.225000000000000000e+01 5.675000000000000000e+01
1.200000000000000000e+01 5.119846153846156085e+02 2.518952636718750000e+02 2.416076660156250000e-01 0.000000000000000000e+00 8.235294222831726074e-01 2.438060302734375000e+03 3.390396833419799805e+00 4.000000000000000000e+00 1.000000000000000000e+00 1.242617416381835938e+02 6.275000000000000000e+01 5.675000000000000000e+01
5.300000000000000000e+01 5.083384615384617291e+02 2.507869567871093750e+02 3.190917968750000000e-01 0.000000000000000000e+00 8.823529481887817383e-01 2.459785888671875000e+03 3.387668848037719727e+00 4.000000000000000000e+00 4.000000000000000000e+00 1.419373168945312500e+02 6.325000000000000000e+01 5.675000000000000000e+01
4.000000000000000000e+01 5.102076923076922412e+02 2.498737182617187500e+02 3.966064453125000000e-01 0.000000000000000000e+00 0.000000000000000000e+00 2.481511474609375000e+03 3.384619474411010742e+00 4.000000000000000000e+00 3.000000000000000000e+00 1.203241500854492188e+02 6.375000000000000000e+01 5.675000000000000000e+01
5.700000000000000000e+01 4.953307692307692491e+02 2.471450805664062500e+02 3.788757324218750000e-01 0.000000000000000000e+00 2.941176593303680420e-01 2.489664306640625000e+03 3.380324602127075195e+00 5.000000000000000000e+00 4.000000000000000000e+00 1.054941329956054688e+02 6.425000000000000000e+01 5.675000000000000000e+01
5.900000000000000000e+01 4.859846153846152106e+02 2.435000610351562500e+02 3.611450195312500000e-01 0.000000000000000000e+00 3.529411852359771729e-01 2.497817138671875000e+03 3.376887083053588867e+00 8.000000000000000000e+00 4.000000000000000000e+00 1.171071853637695312e+02 6.475000000000000000e+01 5.675000000000000000e+01
5.700000000000000000e+01 4.814230769230768487e+02 2.400029907226562500e+02 3.433837890625000000e-01 0.000000000000000000e+00 8.235294222831726074e-01 2.505969970703125000e+03 3.374715566635131836e+00 5.000000000000000000e+00 4.000000000000000000e+00 1.196733627319335938e+02 6.525000000000000000e+01 5.675000000000000000e+01
1.700000000000000000e+01 4.621461538461536520e+02 2.360114288330078125e+02 3.070068359375000000e-01 0.000000000000000000e+00 7.058823704719543457e-01 2.510228027343750000e+03 3.386422872543334961e+00 5.000000000000000000e+00 1.000000000000000000e+00 7.920980072021484375e+01 6.575000000000000000e+01 5.675000000000000000e+01
5.700000000000000000e+01 4.528000000000001251e+02 2.375877990722656250e+02 1.221923828125000000e-01 0.000000000000000000e+00 7.647058963775634766e-01 2.495374755859375000e+03 3.365617275238037109e+00 4.000000000000000000e+00 4.000000000000000000e+00 8.640583038330078125e+01 6.675000000000000000e+01 5.675000000000000000e+01
4.800000000000000000e+01 4.534076923076923435e+02 2.434563751220703125e+02 2.981567382812500000e-02 0.000000000000000000e+00 0.000000000000000000e+00 2.487948242187500000e+03 3.352227210998535156e+00 3.000000000000000000e+00 4.000000000000000000e+00 1.256984100341796875e+02 6.725000000000000000e+01 5.675000000000000000e+01
2.900000000000000000e+01 4.470461538461539703e+02 2.420031585693359375e+02 -5.148315429687500000e-02 0.000000000000000000e+00 7.058823704719543457e-01 2.480483154296875000e+03 3.347429513931274414e+00 5.000000000000000000e+00 3.000000000000000000e+00 1.351704254150390625e+02 6.775000000000000000e+01 5.675000000000000000e+01
6.100000000000000000e+01 7.901153846153846416e+02 3.791062622070312500e+02 2.442047119140625000e+00 0.000000000000000000e+00 0.000000000000000000e+00 2.579810546875000000e+03 3.297588109970092773e+00 5.000000000000000000e+00 4.000000000000000000e+00 2.276143798828125000e+02 3.325000000000000000e+01 5.725000000000000000e+01
6.300000000000000000e+01 7.972000000000002728e+02 3.787138977050781250e+02 2.265869140625000000e+00 0.000000000000000000e+00 4.705882370471954346e-01 2.545571777343750000e+03 3.298094272613525391e+00 5.000000000000000000e+00 4.000000000000000000e+00 2.623057250976562500e+02 3.375000000000000000e+01 5.725000000000000000e+01
8.000000000000000000e+00 7.765538461538461661e+02 3.758628540039062500e+02 2.178039550781250000e+00 0.000000000000000000e+00 0.000000000000000000e+00 2.537931640625000000e+03 3.316701650619506836e+00 5.000000000000000000e+00 1.000000000000000000e+00 2.350426940917968750e+02 3.425000000000000000e+01 5.725000000000000000e+01
1.200000000000000000e+01 7.237846153846151083e+02 3.666572265625000000e+02 2.002410888671875000e+00 0.000000000000000000e+00 5.882352963089942932e-02 2.522651367187500000e+03 3.360651493072509766e+00 5.000000000000000000e+00 1.000000000000000000e+00 2.018808898925781250e+02 3.525000000000000000e+01 5.725000000000000000e+01
5.700000000000000000e+01 6.971076923076925596e+02 3.646696777343750000e+02 1.927795410156250000e+00 0.000000000000000000e+00 0.000000000000000000e+00 2.516698730468750000e+03 3.376883983612060547e+00 5.000000000000000000e+00 4.000000000000000000e+00 1.669712371826171875e+02 3.575000000000000000e+01 5.725000000000000000e+01
5.400000000000000000e+01 6.903846153846152447e+02 3.641549377441406250e+02 1.892761230468750000e+00 0.000000000000000000e+00 0.000000000000000000e+00 2.515808837890625000e+03 3.386436462402343750e+00 5.000000000000000000e+00 4.000000000000000000e+00 1.516607818603515625e+02 3.625000000000000000e+01 5.725000000000000000e+01
5.800000000000000000e+01 6.490384615384616609e+02 3.553366088867187500e+02 1.822692871093750000e+00 0.000000000000000000e+00 0.000000000000000000e+00 2.514029541015625000e+03 3.418303251266479492e+00 5.000000000000000000e+00 4.000000000000000000e+00 1.322870178222656250e+02 3.725000000000000000e+01 5.725000000000000000e+01
5.900000000000000000e+01 6.299615384615383391e+02 3.322337646484375000e+02 1.869201660156250000e+00 0.000000000000000000e+00 0.000000000000000000e+00 2.532862060546875000e+03 3.422316551208496094e+00 5.000000000000000000e+00 4.000000000000000000e+00 1.479734191894531250e+02 3.825000000000000000e+01 5.725000000000000000e+01
1.300000000000000000e+01 5.681923076923073950e+02 3.131720275878906250e+02 1.986175537109375000e+00 0.000000000000000000e+00 0.000000000000000000e+00 2.568655761718750000e+03 3.456490039825439453e+00 5.000000000000000000e+00 1.000000000000000000e+00 1.376541595458984375e+02 4.025000000000000000e+01 5.725000000000000000e+01
4.800000000000000000e+01 5.710538461538463935e+02 3.145120239257812500e+02 1.998138427734375000e+00 0.000000000000000000e+00 6.470588445663452148e-01 2.572585693359375000e+03 3.462045669555664062e+00 5.000000000000000000e+00 4.000000000000000000e+00 1.350052947998046875e+02 4.075000000000000000e+01 5.725000000000000000e+01
4.500000000000000000e+01 5.847692307692304894e+02 3.137665710449218750e+02 2.010131835937500000e+00 0.000000000000000000e+00 0.000000000000000000e+00 2.576515869140625000e+03 3.457113027572631836e+00 5.000000000000000000e+00 4.000000000000000000e+00 1.263317031860351562e+02 4.125000000000000000e+01 5.725000000000000000e+01
1.000000000000000000e+01 5.996923076923077360e+02 3.119278869628906250e+02 1.948638916015625000e+00 0.000000000000000000e+00 3.529411852359771729e-01 2.570015625000000000e+03 3.447099447250366211e+00 5.000000000000000000e+00 1.000000000000000000e+00 1.500924987792968750e+02 4.175000000000000000e+01 5.725000000000000000e+01
2.600000000000000000e+01 5.999846153846154948e+02 3.168895263671875000e+02 1.825622558593750000e+00 0.000000000000000000e+00 2.941176593303680420e-01 2.557015380859375000e+03 3.446989059448242188e+00 5.000000000000000000e+00 3.000000000000000000e+00 1.174494476318359375e+02 4.275000000000000000e+01 5.725000000000000000e+01
5.300000000000000000e+01 6.038769230769231626e+02 3.283021240234375000e+02 1.621246337890625000e+00 0.000000000000000000e+00 0.000000000000000000e+00 2.535524169921875000e+03 3.446308851242065430e+00 5.000000000000000000e+00 4.000000000000000000e+00 1.602927246093750000e+02 4.375000000000000000e+01 5.725000000000000000e+01
4.700000000000000000e+01 6.013230769230765418e+02 3.400587768554687500e+02 1.368103027343750000e+00 0.000000000000000000e+00 0.000000000000000000e+00 2.508938476562500000e+03 3.464225292205810547e+00 5.000000000000000000e+00 4.000000000000000000e+00 1.490554504394531250e+02 4.475000000000000000e+01 5.725000000000000000e+01
3.900000000000000000e+01 6.105153846153843915e+02 3.385697631835937500e+02 1.266815185546875000e+00 0.000000000000000000e+00 5.882352963089942932e-02 2.498815185546875000e+03 3.473379611968994141e+00 5.000000000000000000e+00 3.000000000000000000e+00 1.101813888549804688e+02 4.525000000000000000e+01 5.725000000000000000e+01
2.600000000000000000e+01 6.012923076923075314e+02 3.324091491699218750e+02 1.190826416015625000e+00 0.000000000000000000e+00 0.000000000000000000e+00 2.491860839843750000e+03 3.477917909622192383e+00 5.000000000000000000e+00 3.000000000000000000e+00 1.436983795166015625e+02 4.575000000000000000e+01 5.725000000000000000e+01
7.000000000000000000e+00 5.986384615384615699e+02 3.223764343261718750e+02 1.114837646484375000e+00 0.000000000000000000e+00 2.352941185235977173e-01 2.484906494140625000e+03 3.482575178146362305e+00 5.000000000000000000e+00 1.000000000000000000e+00 1.281831054687500000e+02 4.625000000000000000e+01 5.725000000000000000e+01
6.400000000000000000e+01 5.943000000000000682e+02 3.154812622070312500e+02 1.038879394531250000e+00 0.000000000000000000e+00 0.000000000000000000e+00 2.477952392578125000e+03 3.489226341247558594e+00 5.000000000000000000e+00 4.000000000000000000e+00 1.470533752441406250e+02 4.675000000000000000e+01 5.725000000000000000e+01
1.500000000000000000e+01 6.150538461538460524e+02 3.171262817382812500e+02 9.819946289062500000e-01 0.000000000000000000e+00 0.000000000000000000e+00 2.477015380859375000e+03 3.457950115203857422e+00 5.000000000000000000e+00 1.000000000000000000e+00 1.436899566650390625e+02 4.775000000000000000e+01 5.725000000000000000e+01
2.200000000000000000e+01 6.148538461538460069e+02 3.466260681152343750e+02 9.605102539062500000e-01 0.000000000000000000e+00 5.294117927551269531e-01 2.480577636718750000e+03 3.490737915039062500e+00 5.000000000000000000e+00 3.000000000000000000e+00 1.347823638916015625e+02 4.925000000000000000e+01 5.725000000000000000e+01
6.000000000000000000e+01 5.969769230769231854e+02 3.523461914062500000e+02 1.004089355468750000e+00 0.000000000000000000e+00 0.000000000000000000e+00 2.485869384765625000e+03 2.244364023208618164e+00 8.000000000000000000e+00 4.000000000000000000e+00 1.197862854003906250e+02 5.025000000000000000e+01 5.725000000000000000e+01
6.300000000000000000e+01 5.849461538461538339e+02 3.477511901855468750e+02 1.017486572265625000e+00 0.000000000000000000e+00 0.000000000000000000e+00 2.485374755859375000e+03 2.241063356399536133e+00 5.000000000000000000e+00 4.000000000000000000e+00 1.383328247070312500e+02 5.075000000000000000e+01 5.725000000000000000e+01
6.200000000000000000e+01 5.742461538461536747e+02 3.302031555175781250e+02 1.005798339843750000e+00 0.000000000000000000e+00 0.000000000000000000e+00 2.475459228515625000e+03 2.231032133102416992e+00 5.000000000000000000e+00 4.000000000000000000e+00 1.216437454223632812e+02 5.125000000000000000e+01 5.725000000000000000e+01
1.500000000000000000e+01 5.876153846153845279e+02 2.765876464843750000e+02 9.324035644531250000e-01 0.000000000000000000e+00 0.000000000000000000e+00 2.439030273437500000e+03 2.183547019958496094e+00 5.000000000000000000e+00 1.000000000000000000e+00 2.483314056396484375e+02 5.275000000000000000e+01 5.725000000000000000e+01
1.100000000000000000e+01 5.812923076923076451e+02 2.810847778320312500e+02 8.441467285156250000e-01 0.000000000000000000e+00 0.000000000000000000e+00 2.415750000000000000e+03 2.430303335189819336e+00 5.000000000000000000e+00 1.000000000000000000e+00 1.977957153320312500e+02 5.325000000000000000e+01 5.725000000000000000e+01
4.400000000000000000e+01 6.054076923076920593e+02 2.962412109375000000e+02 5.206298828125000000e-01 0.000000000000000000e+00 2.941176593303680420e-01 2.343830566406250000e+03 3.385546445846557617e+00 5.000000000000000000e+00 3.000000000000000000e+00 1.746571807861328125e+02 5.475000000000000000e+01 5.725000000000000000e+01
5.000000000000000000e+01 6.416923076923078497e+02 3.198031311035156250e+02 2.087402343750000000e-02 0.000000000000000000e+00 0.000000000000000000e+00 2.265674560546875000e+03 3.324157953262329102e+00 5.000000000000000000e+00 4.000000000000000000e+00 2.298951873779296875e+02 5.625000000000000000e+01 5.725000000000000000e+01
9.000000000000000000e+00 6.460615384615385892e+02 3.361207275390625000e+02 -1.038513183593750000e-01 0.000000000000000000e+00 6.470588445663452148e-01 2.252398193359375000e+03 3.328237056732177734e+00 5.000000000000000000e+00 1.000000000000000000e+00 1.905286712646484375e+02 5.675000000000000000e+01 5.725000000000000000e+01
4.300000000000000000e+01 6.493230769230768828e+02 3.859973754882812500e+02 -3.532409667968750000e-01 0.000000000000000000e+00 0.000000000000000000e+00 2.225845947265625000e+03 2.657643556594848633e+00 5.000000000000000000e+00 3.000000000000000000e+00 2.488628234863281250e+02 5.775000000000000000e+01 5.725000000000000000e+01
6.500000000000000000e+01 6.540461538461537430e+02 4.016372070312500000e+02 -4.509582519531250000e-01 0.000000000000000000e+00 0.000000000000000000e+00 2.218054931640625000e+03 2.089505672454833984e+00 5.000000000000000000e+00 4.000000000000000000e+00 2.849791259765625000e+02 5.825000000000000000e+01 5.725000000000000000e+01
4.800000000000000000e+01 6.516923076923075087e+02 3.497123718261718750e+02 -4.843444824218750000e-01 0.000000000000000000e+00 0.000000000000000000e+00 2.235384277343750000e+03 8.940400481224060059e-01 1.300000000000000000e+01 4.000000000000000000e+00 3.147374267578125000e+02 5.925000000000000000e+01 5.725000000000000000e+01
6.100000000000000000e+01 6.362999999999998408e+02 3.065292968750000000e+02 -5.010375976562500000e-01 0.000000000000000000e+00 2.352941185235977173e-01 2.244048828125000000e+03 1.627591371536254883e+00 1.300000000000000000e+01 4.000000000000000000e+00 3.750379333496093750e+02 5.975000000000000000e+01 5.725000000000000000e+01
6.800000000000000000e+01 6.032000000000000455e+02 2.810648498535156250e+02 -4.692382812500000000e-01 0.000000000000000000e+00 7.058823704719543457e-01 2.260893066406250000e+03 2.093846797943115234e+00 1.300000000000000000e+01 4.000000000000000000e+00 3.042055664062500000e+02 6.025000000000000000e+01 5.725000000000000000e+01
6.500000000000000000e+01 5.765923076923073722e+02 2.716993103027343750e+02 -3.889770507812500000e-01 0.000000000000000000e+00 0.000000000000000000e+00 2.285916748046875000e+03 2.072839260101318359e+00 5.000000000000000000e+00 4.000000000000000000e+00 2.612136535644531250e+02 6.075000000000000000e+01 5.725000000000000000e+01
6.300000000000000000e+01 5.494769230769228443e+02 2.671820068359375000e+02 -3.087158203125000000e-01 0.000000000000000000e+00 0.000000000000000000e+00 2.310940429687500000e+03 1.314306855201721191e+00 5.000000000000000000e+00 4.000000000000000000e+00 2.287530975341796875e+02 6.125000000000000000e+01 5.725000000000000000e+01
6.100000000000000000e+01 5.369461538461538339e+02 2.642530822753906250e+02 -2.284545898437500000e-01 0.000000000000000000e+00 5.882353186607360840e-01 2.335964111328125000e+03 1.035315752029418945e+00 5.000000000000000000e+00 4.000000000000000000e+00 2.165928039550781250e+02 6.175000000000000000e+01 5.725000000000000000e+01
6.000000000000000000e+01 5.251230769230768374e+02 2.609636230468750000e+02 -1.496582031250000000e-01 0.000000000000000000e+00 0.000000000000000000e+00 2.357273681640625000e+03 1.597427129745483398e+00 4.000000000000000000e+00 4.000000000000000000e+00 1.457760772705078125e+02 6.225000000000000000e+01 5.725000000000000000e+01
5.000000000000000000e+01 5.212692307692311715e+02 2.601380310058593750e+02 -7.131958007812500000e-02 0.000000000000000000e+00 1.235294103622436523e+00 2.377345214843750000e+03 2.598324298858642578e+00 4.000000000000000000e+00 4.000000000000000000e+00 1.424113464355468750e+02 6.275000000000000000e+01 5.725000000000000000e+01
4.400000000000000000e+01 5.220076923076923094e+02 2.618370666503906250e+02 7.019042968750000000e-03 0.000000000000000000e+00 2.941176593303680420e-01 2.397416992187500000e+03 2.153646469116210938e+00 4.000000000000000000e+00 3.000000000000000000e+00 1.404690399169921875e+02 6.325000000000000000e+01 5.725000000000000000e+01
4.200000000000000000e+01 5.248230769230768828e+02 2.633892822265625000e+02 8.532714843750000000e-02 0.000000000000000000e+00 5.294117927551269531e-01 2.417488525390625000e+03 3.138263702392578125e+00 8.000000000000000000e+00 3.000000000000000000e+00 1.413553161621093750e+02 6.375000000000000000e+01 5.725000000000000000e+01
3.400000000000000000e+01 5.053384615384613880e+02 2.615537719726562500e+02 7.614135742187500000e-02 0.000000000000000000e+00 2.941176593303680420e-01 2.425053710937500000e+03 3.370022058486938477e+00 8.000000000000000000e+00 3.000000000000000000e+00 1.293414154052734375e+02 6.425000000000000000e+01 5.725000000000000000e+01
5.500000000000000000e+01 4.912230769230769738e+02 2.573635864257812500e+02 6.695556640625000000e-02 0.000000000000000000e+00 6.470588445663452148e-01 2.432619140625000000e+03 3.375091791152954102e+00 5.000000000000000000e+00 4.000000000000000000e+00 1.195590972900390625e+02 6.475000000000000000e+01 5.725000000000000000e+01
2.400000000000000000e+01 4.860461538461538566e+02 2.541771392822265625e+02 5.776977539062500000e-02 0.000000000000000000e+00 5.882353186607360840e-01 2.440184326171875000e+03 3.370682239532470703e+00 5.000000000000000000e+00 3.000000000000000000e+00 5.650275039672851562e+01 6.525000000000000000e+01 5.725000000000000000e+01
5.300000000000000000e+01 4.914769230769227306e+02 2.541778259277343750e+02 2.746582031250000000e-02 0.000000000000000000e+00 7.058823704719543457e-01 2.443991699218750000e+03 3.364838123321533203e+00 5.000000000000000000e+00 4.000000000000000000e+00 5.584343719482421875e+01 6.575000000000000000e+01 5.725000000000000000e+01
1.900000000000000000e+01 4.890923076923074859e+02 2.577051086425781250e+02 -6.610107421875000000e-02 0.000000000000000000e+00 3.529411852359771729e-01 2.436524902343750000e+03 3.369555950164794922e+00 5.000000000000000000e+00 1.000000000000000000e+00 6.048430633544921875e+01 6.625000000000000000e+01 5.725000000000000000e+01
6.000000000000000000e+00 4.857923076923076451e+02 2.644172973632812500e+02 -1.596679687500000000e-01 0.000000000000000000e+00 2.941176593303680420e-01 2.429058105468750000e+03 3.363686800003051758e+00 5.000000000000000000e+00 1.000000000000000000e+00 5.038246917724609375e+01 6.675000000000000000e+01 5.725000000000000000e+01
3.200000000000000000e+01 4.821000000000001364e+02 2.650291137695312500e+02 -2.532348632812500000e-01 0.000000000000000000e+00 9.411764740943908691e-01 2.421591552734375000e+03 2.959089279174804688e+00 5.000000000000000000e+00 3.000000000000000000e+00 5.771920394897460938e+01 6.725000000000000000e+01 5.725000000000000000e+01
5.300000000000000000e+01 7.850615384615385892e+02 3.745935363769531250e+02 2.444366455078125000e+00 0.000000000000000000e+00 0.000000000000000000e+00 2.570111083984375000e+03 3.292288541793823242e+00 5.000000000000000000e+00 4.000000000000000000e+00 2.304531555175781250e+02 3.325000000000000000e+01 5.775000000000000000e+01
5.000000000000000000e+01 7.365461538461534019e+02 3.695688476562500000e+02 2.010925292968750000e+00 0.000000000000000000e+00 0.000000000000000000e+00 2.505942871093750000e+03 3.306505441665649414e+00 5.000000000000000000e+00 4.000000000000000000e+00 1.700625000000000000e+02 3.475000000000000000e+01 5.775000000000000000e+01
1.500000000000000000e+01 6.468538461538460069e+02 3.422674255371093750e+02 1.549530029296875000e+00 0.000000000000000000e+00 2.941176593303680420e-01 2.460902099609375000e+03 3.385737657546997070e+00 5.000000000000000000e+00 1.000000000000000000e+00 1.473909759521484375e+02 3.775000000000000000e+01 5.775000000000000000e+01
6.000000000000000000e+00 6.238769230769231626e+02 3.354039001464843750e+02 1.560272216796875000e+00 0.000000000000000000e+00 0.000000000000000000e+00 2.469781250000000000e+03 3.393732547760009766e+00 5.000000000000000000e+00 1.000000000000000000e+00 1.281006164550781250e+02 3.825000000000000000e+01 5.775000000000000000e+01
5.300000000000000000e+01 6.047153846153848917e+02 3.312488098144531250e+02 1.571014404296875000e+00 0.000000000000000000e+00 5.294117927551269531e-01 2.478660156250000000e+03 3.392266273498535156e+00 5.000000000000000000e+00 4.000000000000000000e+00 1.247051696777343750e+02 3.875000000000000000e+01 5.775000000000000000e+01
7.000000000000000000e+00 5.816538461538460751e+02 3.267604370117187500e+02 1.581726074218750000e+00 0.000000000000000000e+00 8.235294222831726074e-01 2.487539062500000000e+03 3.393030166625976562e+00 5.000000000000000000e+00 1.000000000000000000e+00 1.318974151611328125e+02 3.925000000000000000e+01 5.775000000000000000e+01
6.800000000000000000e+01 5.700384615384614335e+02 3.099416503906250000e+02 1.638885498046875000e+00 0.000000000000000000e+00 5.294117927551269531e-01 2.504579101562500000e+03 3.430328845977783203e+00 5.000000000000000000e+00 4.000000000000000000e+00 1.366047210693359375e+02 4.125000000000000000e+01 5.775000000000000000e+01
1.300000000000000000e+01 5.658307692307688512e+02 3.086952819824218750e+02 1.598663330078125000e+00 0.000000000000000000e+00 0.000000000000000000e+00 2.501082763671875000e+03 3.421900033950805664e+00 5.000000000000000000e+00 1.000000000000000000e+00 1.700552673339843750e+02 4.175000000000000000e+01 5.775000000000000000e+01
1.600000000000000000e+01 5.757461538461537884e+02 3.120556030273437500e+02 1.558410644531250000e+00 0.000000000000000000e+00 0.000000000000000000e+00 2.497586425781250000e+03 3.410713911056518555e+00 5.000000000000000000e+00 1.000000000000000000e+00 1.271150054931640625e+02 4.225000000000000000e+01 5.775000000000000000e+01
6.700000000000000000e+01 5.707461538461537884e+02 3.159183044433593750e+02 1.518188476562500000e+00 0.000000000000000000e+00 2.941176593303680420e-01 2.494090087890625000e+03 3.407473802566528320e+00 5.000000000000000000e+00 4.000000000000000000e+00 1.263092575073242188e+02 4.275000000000000000e+01 5.775000000000000000e+01
5.600000000000000000e+01 5.661230769230771784e+02 3.194657287597656250e+02 1.460937500000000000e+00 0.000000000000000000e+00 5.882352963089942932e-02 2.488512207031250000e+03 3.405614852905273438e+00 5.000000000000000000e+00 4.000000000000000000e+00 1.064218368530273438e+02 4.325000000000000000e+01 5.775000000000000000e+01
3.700000000000000000e+01 5.726692307692309214e+02 3.242434082031250000e+02 1.352661132812500000e+00 0.000000000000000000e+00 0.000000000000000000e+00 2.476690429687500000e+03 1.826115846633911133e+00 5.000000000000000000e+00 3.000000000000000000e+00 9.234892272949218750e+01 4.375000000000000000e+01 5.775000000000000000e+01
6.200000000000000000e+01 5.584769230769229580e+02 3.309150390625000000e+02 1.244384765625000000e+00 0.000000000000000000e+00 0.000000000000000000e+00 2.464868652343750000e+03 2.027161121368408203e+00 5.000000000000000000e+00 4.000000000000000000e+00 1.279152526855468750e+02 4.425000000000000000e+01 5.775000000000000000e+01
6.500000000000000000e+01 5.755076923076926505e+02 3.356448669433593750e+02 1.136108398437500000e+00 0.000000000000000000e+00 0.000000000000000000e+00 2.453046875000000000e+03 3.420711994171142578e+00 5.000000000000000000e+00 4.000000000000000000e+00 1.610350646972656250e+02 4.475000000000000000e+01 5.775000000000000000e+01
4.000000000000000000e+01 5.970538461538460524e+02 3.357338562011718750e+02 1.049072265625000000e+00 0.000000000000000000e+00 0.000000000000000000e+00 2.443587890625000000e+03 3.424905300140380859e+00 5.000000000000000000e+00 3.000000000000000000e+00 1.282610778808593750e+02 4.525000000000000000e+01 5.775000000000000000e+01
4.300000000000000000e+01 6.089615384615383391e+02 3.291624450683593750e+02 9.832763671875000000e-01 0.000000000000000000e+00 0.000000000000000000e+00 2.436491699218750000e+03 3.430617094039916992e+00 5.000000000000000000e+00 3.000000000000000000e+00 9.935707092285156250e+01 4.575000000000000000e+01 5.775000000000000000e+01
6.000000000000000000e+01 6.178615384615383164e+02 3.112876892089843750e+02 8.516845703125000000e-01 0.000000000000000000e+00 0.000000000000000000e+00 2.422299804687500000e+03 3.326849937438964844e+00 5.000000000000000000e+00 4.000000000000000000e+00 1.463985290527343750e+02 4.675000000000000000e+01 5.775000000000000000e+01
6.000000000000000000e+00 6.204769230769229580e+02 3.124597167968750000e+02 8.231811523437500000e-01 0.000000000000000000e+00 5.294117927551269531e-01 2.420157714843750000e+03 3.312457084655761719e+00 5.000000000000000000e+00 1.000000000000000000e+00 1.323124542236328125e+02 4.725000000000000000e+01 5.775000000000000000e+01
4.700000000000000000e+01 6.257307692307692832e+02 3.197232971191406250e+02 8.070983886718750000e-01 0.000000000000000000e+00 0.000000000000000000e+00 2.419666992187500000e+03 2.790849447250366211e+00 5.000000000000000000e+00 4.000000000000000000e+00 1.159805221557617188e+02 4.775000000000000000e+01 5.775000000000000000e+01
9.000000000000000000e+00 6.323307692307690786e+02 3.340017700195312500e+02 7.910156250000000000e-01 0.000000000000000000e+00 2.352941185235977173e-01 2.419176025390625000e+03 2.633787393569946289e+00 5.000000000000000000e+00 1.000000000000000000e+00 1.229999618530273438e+02 4.825000000000000000e+01 5.775000000000000000e+01
3.500000000000000000e+01 6.345999999999999091e+02 3.601160278320312500e+02 8.066711425781250000e-01 0.000000000000000000e+00 0.000000000000000000e+00 2.422349365234375000e+03 3.448044300079345703e+00 5.000000000000000000e+00 3.000000000000000000e+00 1.847322387695312500e+02 4.925000000000000000e+01 5.775000000000000000e+01
5.000000000000000000e+00 6.139615384615383391e+02 3.612914123535156250e+02 8.701782226562500000e-01 0.000000000000000000e+00 2.941176593303680420e-01 2.429677490234375000e+03 3.436172008514404297e+00 5.000000000000000000e+00 1.000000000000000000e+00 9.710181427001953125e+01 5.025000000000000000e+01 5.775000000000000000e+01
1.400000000000000000e+01 5.933692307692307395e+02 2.558495330810546875e+02 8.357238769531250000e-01 0.000000000000000000e+00 0.000000000000000000e+00 2.405772705078125000e+03 2.612569332122802734e+00 5.000000000000000000e+00 1.000000000000000000e+00 2.134998321533203125e+02 5.225000000000000000e+01 5.775000000000000000e+01
9.000000000000000000e+00 6.012461538461540158e+02 2.476357116699218750e+02 7.851562500000000000e-01 0.000000000000000000e+00 8.235294222831726074e-01 2.391427490234375000e+03 2.156093358993530273e+00 5.000000000000000000e+00 1.000000000000000000e+00 2.128088531494140625e+02 5.275000000000000000e+01 5.775000000000000000e+01
6.500000000000000000e+01 6.053769230769231626e+02 2.583427429199218750e+02 7.019348144531250000e-01 0.000000000000000000e+00 8.235294222831726074e-01 2.370937744140625000e+03 2.146941184997558594e+00 5.000000000000000000e+00 4.000000000000000000e+00 1.948022613525390625e+02 5.325000000000000000e+01 5.775000000000000000e+01
2.600000000000000000e+01 6.189692307692308759e+02 2.753526306152343750e+02 6.187133789062500000e-01 0.000000000000000000e+00 4.705882370471954346e-01 2.350447998046875000e+03 2.139130592346191406e+00 5.000000000000000000e+00 3.000000000000000000e+00 2.148352050781250000e+02 5.375000000000000000e+01 5.775000000000000000e+01
3.900000000000000000e+01 6.317999999999999545e+02 2.916995849609375000e+02 5.354919433593750000e-01 0.000000000000000000e+00 0.000000000000000000e+00 2.329958496093750000e+03 3.083048820495605469e+00 5.000000000000000000e+00 3.000000000000000000e+00 2.110177307128906250e+02 5.425000000000000000e+01 5.775000000000000000e+01
6.000000000000000000e+01 6.390307692307693515e+02 3.037077636718750000e+02 3.841857910156250000e-01 0.000000000000000000e+00 0.000000000000000000e+00 2.306009765625000000e+03 2.896567583084106445e+00 5.000000000000000000e+00 4.000000000000000000e+00 2.098229064941406250e+02 5.475000000000000000e+01 5.775000000000000000e+01
5.000000000000000000e+01 6.477769230769232536e+02 3.139880676269531250e+02 2.102355957031250000e-01 0.000000000000000000e+00 7.058823704719543457e-01 2.280908203125000000e+03 2.704689502716064453e+00 5.000000000000000000e+00 4.000000000000000000e+00 1.595552673339843750e+02 5.525000000000000000e+01 5.775000000000000000e+01
6.300000000000000000e+01 6.597769230769231399e+02 3.223115539550781250e+02 3.625488281250000000e-02 0.000000000000000000e+00 0.000000000000000000e+00 2.255806640625000000e+03 2.957627534866333008e+00 5.000000000000000000e+00 4.000000000000000000e+00 2.332227630615234375e+02 5.575000000000000000e+01 5.775000000000000000e+01
6.100000000000000000e+01 6.669230769230767919e+02 3.296523437500000000e+02 -1.377258300781250000e-01 0.000000000000000000e+00 2.941176593303680420e-01 2.230705078125000000e+03 2.639303684234619141e+00 5.000000000000000000e+00 4.000000000000000000e+00 2.155249938964843750e+02 5.625000000000000000e+01 5.775000000000000000e+01
5.900000000000000000e+01 6.732384615384615927e+02 3.509396362304687500e+02 -2.762145996093750000e-01 0.000000000000000000e+00 0.000000000000000000e+00 2.217289550781250000e+03 2.153910160064697266e+00 5.000000000000000000e+00 4.000000000000000000e+00 1.708706817626953125e+02 5.675000000000000000e+01 5.775000000000000000e+01
6.200000000000000000e+01 6.710461538461537430e+02 4.082599487304687500e+02 -5.532226562500000000e-01 0.000000000000000000e+00 0.000000000000000000e+00 2.190458496093750000e+03 2.088843584060668945e+00 5.000000000000000000e+00 4.000000000000000000e+00 2.081649017333984375e+02 5.775000000000000000e+01 5.775000000000000000e+01
6.100000000000000000e+01 6.727769230769227988e+02 4.154465332031250000e+02 -6.648559570312500000e-01 0.000000000000000000e+00 0.000000000000000000e+00 2.182082763671875000e+03 2.071117639541625977e+00 5.000000000000000000e+00 4.000000000000000000e+00 3.684231262207031250e+02 5.825000000000000000e+01 5.775000000000000000e+01
6.600000000000000000e+01 6.763999999999998636e+02 3.912393188476562500e+02 -6.958312988281250000e-01 0.000000000000000000e+00 0.000000000000000000e+00 2.188825927734375000e+03 2.046730518341064453e+00 1.300000000000000000e+01 4.000000000000000000e+00 3.008205871582031250e+02 5.875000000000000000e+01 5.775000000000000000e+01
6.500000000000000000e+01 6.681538461538464162e+02 3.365175476074218750e+02 -7.268066406250000000e-01 0.000000000000000000e+00 0.000000000000000000e+00 2.195569335937500000e+03 9.750168323516845703e-01 1.300000000000000000e+01 4.000000000000000000e+00 3.543586730957031250e+02 5.925000000000000000e+01 5.775000000000000000e+01
6.400000000000000000e+01 6.415000000000001137e+02 2.827569274902343750e+02 -7.577819824218750000e-01 0.000000000000000000e+00 0.000000000000000000e+00 2.202312744140625000e+03 8.296218514442443848e-01 1.300000000000000000e+01 4.000000000000000000e+00 2.672571411132812500e+02 5.975000000000000000e+01 5.775000000000000000e+01
4.200000000000000000e+01 6.115307692307690104e+02 2.598476562500000000e+02 -7.398681640625000000e-01 0.000000000000000000e+00 0.000000000000000000e+00 2.216179687500000000e+03 2.002673149108886719e+00 1.300000000000000000e+01 3.000000000000000000e+00 2.741072692871093750e+02 6.025000000000000000e+01 5.775000000000000000e+01
4.400000000000000000e+01 5.882615384615385210e+02 2.583826904296875000e+02 -6.730957031250000000e-01 0.000000000000000000e+00 0.000000000000000000e+00 2.237170410156250000e+03 1.069561481475830078e+00 1.300000000000000000e+01 3.000000000000000000e+00 2.097865753173828125e+02 6.075000000000000000e+01 5.775000000000000000e+01
4.900000000000000000e+01 5.500692307692304439e+02 2.627828674316406250e+02 -5.394897460937500000e-01 0.000000000000000000e+00 3.529411852359771729e-01 2.279152099609375000e+03 1.380104780197143555e+00 5.000000000000000000e+00 4.000000000000000000e+00 1.656263275146484375e+02 6.175000000000000000e+01 5.775000000000000000e+01
5.200000000000000000e+01 5.394538461538461434e+02 2.666929931640625000e+02 -4.634094238281250000e-01 0.000000000000000000e+00 1.117647051811218262e+00 2.298212890625000000e+03 9.236701726913452148e-01 4.000000000000000000e+00 4.000000000000000000e+00 1.323021850585937500e+02 6.225000000000000000e+01 5.775000000000000000e+01
2.400000000000000000e+01 5.272615384615386347e+02 2.722477416992187500e+02 -3.842468261718750000e-01 0.000000000000000000e+00 0.000000000000000000e+00 2.316630371093750000e+03 1.520845055580139160e+00 4.000000000000000000e+00 3.000000000000000000e+00 9.226368713378906250e+01 6.275000000000000000e+01 5.775000000000000000e+01
5.400000000000000000e+01 5.284384615384617518e+02 2.776207580566406250e+02 -3.050842285156250000e-01 0.000000000000000000e+00 0.000000000000000000e+00 2.335048095703125000e+03 1.604902148246765137e+00 5.000000000000000000e+00 4.000000000000000000e+00 7.622074890136718750e+01 6.325000000000000000e+01 5.775000000000000000e+01
9.000000000000000000e+00 5.257692307692304894e+02 2.821828002929687500e+02 -2.259216308593750000e-01 0.000000000000000000e+00 2.941176593303680420e-01 2.353465576171875000e+03 2.335818052291870117e+00 8.000000000000000000e+00 1.000000000000000000e+00 9.013185119628906250e+01 6.375000000000000000e+01 5.775000000000000000e+01
5.800000000000000000e+01 5.063999999999997499e+02 2.757932739257812500e+02 -2.272338867187500000e-01 0.000000000000000000e+00 0.000000000000000000e+00 2.367420898437500000e+03 1.251554131507873535e+00 5.000000000000000000e+00 4.000000000000000000e+00 9.180858612060546875e+01 6.475000000000000000e+01 5.775000000000000000e+01
5.800000000000000000e+01 5.049384615384615245e+02 2.724075012207031250e+02 -2.278747558593750000e-01 0.000000000000000000e+00 2.352941185235977173e-01 2.374398681640625000e+03 3.128777265548706055e+00 5.000000000000000000e+00 4.000000000000000000e+00 9.685378265380859375e+01 6.525000000000000000e+01 5.775000000000000000e+01
9.000000000000000000e+00 5.034153846153848235e+02 2.702731933593750000e+02 -2.520446777343750000e-01 0.000000000000000000e+00 1.352941155433654785e+00 2.377755126953125000e+03 3.330492019653320312e+00 5.000000000000000000e+00 1.000000000000000000e+00 8.642784881591796875e+01 6.575000000000000000e+01 5.775000000000000000e+01
2.000000000000000000e+01 5.022000000000001592e+02 2.702455444335937500e+02 -3.467712402343750000e-01 0.000000000000000000e+00 2.941176593303680420e-01 2.370248291015625000e+03 3.338022947311401367e+00 5.000000000000000000e+00 3.000000000000000000e+00 5.089590454101562500e+01 6.625000000000000000e+01 5.775000000000000000e+01
5.000000000000000000e+00 5.009230769230768487e+02 2.675450134277343750e+02 -6.395874023437500000e-01 0.000000000000000000e+00 2.941176593303680420e-01 2.345947509765625000e+03 3.297918081283569336e+00 5.000000000000000000e+00 1.000000000000000000e+00 4.974072647094726562e+01 6.775000000000000000e+01 5.775000000000000000e+01
1.800000000000000000e+01 7.424769230769227306e+02 3.710450439453125000e+02 2.393920898437500000e+00 0.000000000000000000e+00 0.000000000000000000e+00 2.553226562500000000e+03 2.591595172882080078e+00 5.000000000000000000e+00 1.000000000000000000e+00 1.819301147460937500e+02 3.325000000000000000e+01 5.825000000000000000e+01
4.400000000000000000e+01 7.338923076923080089e+02 3.752159423828125000e+02 2.174865722656250000e+00 0.000000000000000000e+00 0.000000000000000000e+00 2.507142089843750000e+03 2.974253892898559570e+00 5.000000000000000000e+00 3.000000000000000000e+00 1.626581268310546875e+02 3.375000000000000000e+01 5.825000000000000000e+01
4.800000000000000000e+01 7.036538461538465299e+02 3.760772705078125000e+02 2.043792724609375000e+00 0.000000000000000000e+00 5.882353186607360840e-01 2.493039794921875000e+03 3.329699039459228516e+00 5.000000000000000000e+00 4.000000000000000000e+00 1.494779968261718750e+02 3.425000000000000000e+01 5.825000000000000000e+01
5.800000000000000000e+01 7.067769230769231399e+02 3.682071533203125000e+02 1.912750244140625000e+00 0.000000000000000000e+00 0.000000000000000000e+00 2.478937744140625000e+03 3.317772865295410156e+00 5.000000000000000000e+00 4.000000000000000000e+00 1.516359863281250000e+02 3.475000000000000000e+01 5.825000000000000000e+01
6.300000000000000000e+01 7.211307692307689194e+02 3.574367980957031250e+02 1.781707763671875000e+00 0.000000000000000000e+00 0.000000000000000000e+00 2.464835449218750000e+03 2.909300565719604492e+00 5.000000000000000000e+00 4.000000000000000000e+00 1.832822875976562500e+02 3.525000000000000000e+01 5.825000000000000000e+01
5.300000000000000000e+01 6.779307692307692150e+02 3.497416687011718750e+02 1.659942626953125000e+00 0.000000000000000000e+00 5.882352963089942932e-02 2.451118408203125000e+03 3.139842987060546875e+00 5.000000000000000000e+00 4.000000000000000000e+00 1.424521484375000000e+02 3.575000000000000000e+01 5.825000000000000000e+01
5.200000000000000000e+01 6.648615384615382027e+02 3.460960083007812500e+02 1.565979003906250000e+00 0.000000000000000000e+00 0.000000000000000000e+00 2.438556396484375000e+03 2.302043199539184570e+00 5.000000000000000000e+00 4.000000000000000000e+00 1.552344665527343750e+02 3.625000000000000000e+01 5.825000000000000000e+01
5.900000000000000000e+01 6.953999999999996362e+02 3.439258728027343750e+02 1.378051757812500000e+00 0.000000000000000000e+00 0.000000000000000000e+00 2.413432617187500000e+03 3.318941116333007812e+00 5.000000000000000000e+00 4.000000000000000000e+00 2.182678527832031250e+02 3.725000000000000000e+01 5.825000000000000000e+01
3.800000000000000000e+01 5.739461538461536065e+02 3.275795898437500000e+02 1.282409667968750000e+00 0.000000000000000000e+00 0.000000000000000000e+00 2.429179931640625000e+03 3.351707696914672852e+00 5.000000000000000000e+00 3.000000000000000000e+00 1.367109680175781250e+02 3.975000000000000000e+01 5.825000000000000000e+01
1.300000000000000000e+01 5.510692307692308987e+02 3.185741882324218750e+02 1.293243408203125000e+00 0.000000000000000000e+00 0.000000000000000000e+00 2.432609375000000000e+03 3.372292280197143555e+00 5.000000000000000000e+00 1.000000000000000000e+00 1.438926391601562500e+02 4.025000000000000000e+01 5.825000000000000000e+01
5.400000000000000000e+01 5.578692307692308532e+02 3.088617858886718750e+02 1.304077148437500000e+00 0.000000000000000000e+00 0.000000000000000000e+00 2.436038818359375000e+03 3.375543117523193359e+00 5.000000000000000000e+00 4.000000000000000000e+00 1.106561279296875000e+02 4.075000000000000000e+01 5.825000000000000000e+01
4.700000000000000000e+01 5.754230769230769056e+02 3.024502868652343750e+02 1.314910888671875000e+00 0.000000000000000000e+00 0.000000000000000000e+00 2.439468261718750000e+03 3.362116336822509766e+00 5.000000000000000000e+00 4.000000000000000000e+00 1.152097244262695312e+02 4.125000000000000000e+01 5.825000000000000000e+01
5.500000000000000000e+01 5.814615384615383391e+02 3.033352355957031250e+02 1.285949707031250000e+00 0.000000000000000000e+00 0.000000000000000000e+00 2.437589599609375000e+03 3.343966960906982422e+00 5.000000000000000000e+00 4.000000000000000000e+00 1.771161346435546875e+02 4.175000000000000000e+01 5.825000000000000000e+01
6.100000000000000000e+01 5.696230769230770647e+02 3.117988891601562500e+02 1.257019042968750000e+00 0.000000000000000000e+00 0.000000000000000000e+00 2.435710937500000000e+03 3.332379817962646484e+00 5.000000000000000000e+00 4.000000000000000000e+00 1.871679077148437500e+02 4.225000000000000000e+01 5.825000000000000000e+01
6.000000000000000000e+01 5.659538461538460297e+02 3.238413391113281250e+02 1.228057861328125000e+00 0.000000000000000000e+00 0.000000000000000000e+00 2.433832031250000000e+03 3.328140735626220703e+00 5.000000000000000000e+00 4.000000000000000000e+00 1.856397705078125000e+02 4.275000000000000000e+01 5.825000000000000000e+01
5.600000000000000000e+01 5.617692307692308304e+02 3.330223388671875000e+02 1.182891845703125000e+00 0.000000000000000000e+00 0.000000000000000000e+00 2.429782470703125000e+03 3.326417446136474609e+00 5.000000000000000000e+00 4.000000000000000000e+00 1.412760009765625000e+02 4.325000000000000000e+01 5.825000000000000000e+01
1.400000000000000000e+01 5.583538461538460069e+02 3.376222229003906250e+02 1.089111328125000000e+00 0.000000000000000000e+00 0.000000000000000000e+00 2.419220458984375000e+03 3.122781753540039062e+00 5.000000000000000000e+00 1.000000000000000000e+00 1.285624847412109375e+02 4.375000000000000000e+01 5.825000000000000000e+01
6.400000000000000000e+01 5.399538461538463707e+02 3.397143249511718750e+02 9.953308105468750000e-01 0.000000000000000000e+00 0.000000000000000000e+00 2.408658447265625000e+03 1.901674270629882812e+00 5.000000000000000000e+00 4.000000000000000000e+00 1.539566650390625000e+02 4.425000000000000000e+01 5.825000000000000000e+01
4.300000000000000000e+01 5.667000000000000455e+02 3.419662780761718750e+02 9.015808105468750000e-01 0.000000000000000000e+00 0.000000000000000000e+00 2.398096435546875000e+03 2.801861524581909180e+00 5.000000000000000000e+00 3.000000000000000000e+00 1.192322845458984375e+02 4.475000000000000000e+01 5.825000000000000000e+01
5.800000000000000000e+01 5.874461538461537202e+02 3.423268432617187500e+02 8.259887695312500000e-01 0.000000000000000000e+00 0.000000000000000000e+00 2.389263183593750000e+03 2.739836215972900391e+00 5.000000000000000000e+00 4.000000000000000000e+00 1.308459320068359375e+02 4.525000000000000000e+01 5.825000000000000000e+01
6.200000000000000000e+01 6.257384615384615927e+02 3.395570983886718750e+02 7.686157226562500000e-01 0.000000000000000000e+00 0.000000000000000000e+00 2.382158935546875000e+03 3.367070674896240234e+00 5.000000000000000000e+00 4.000000000000000000e+00 1.164077911376953125e+02 4.575000000000000000e+01 5.825000000000000000e+01
6.400000000000000000e+01 6.216846153846154266e+02 3.311133117675781250e+02 7.112121582031250000e-01 0.000000000000000000e+00 0.000000000000000000e+00 2.375054687500000000e+03 3.374468088150024414e+00 5.000000000000000000e+00 4.000000000000000000e+00 1.178716049194335938e+02 4.625000000000000000e+01 5.825000000000000000e+01
2.100000000000000000e+01 6.337461538461537884e+02 3.323689575195312500e+02 6.190185546875000000e-01 0.000000000000000000e+00 0.000000000000000000e+00 2.364166259765625000e+03 2.251291751861572266e+00 5.000000000000000000e+00 3.000000000000000000e+00 1.315140686035156250e+02 4.775000000000000000e+01 5.825000000000000000e+01
4.700000000000000000e+01 6.421769230769233445e+02 3.708266906738281250e+02 6.307067871093750000e-01 0.000000000000000000e+00 0.000000000000000000e+00 2.365724609375000000e+03 2.781807422637939453e+00 5.000000000000000000e+00 4.000000000000000000e+00 1.536882324218750000e+02 4.925000000000000000e+01 5.825000000000000000e+01
4.600000000000000000e+01 6.325846153846149491e+02 3.719503173828125000e+02 6.658325195312500000e-01 0.000000000000000000e+00 2.352941185235977173e-01 2.369577636718750000e+03 3.384792089462280273e+00 5.000000000000000000e+00 4.000000000000000000e+00 1.480333557128906250e+02 4.975000000000000000e+01 5.825000000000000000e+01
1.300000000000000000e+01 6.289384615384614108e+02 3.684011535644531250e+02 7.009277343750000000e-01 0.000000000000000000e+00 2.941176593303680420e-01 2.373430664062500000e+03 3.360249519348144531e+00 5.000000000000000000e+00 1.000000000000000000e+00 1.950879058837890625e+02 5.025000000000000000e+01 5.825000000000000000e+01
5.700000000000000000e+01 6.138461538461540385e+02 2.320116424560546875e+02 5.917358398437500000e-01 0.000000000000000000e+00 0.000000000000000000e+00 2.339685791015625000e+03 2.133286476135253906e+00 5.000000000000000000e+00 4.000000000000000000e+00 1.993259277343750000e+02 5.275000000000000000e+01 5.825000000000000000e+01
5.800000000000000000e+01 6.394999999999998863e+02 2.676702270507812500e+02 4.227600097656250000e-01 0.000000000000000000e+00 2.941176593303680420e-01 2.302538085937500000e+03 2.108195781707763672e+00 5.000000000000000000e+00 4.000000000000000000e+00 2.915511779785156250e+02 5.375000000000000000e+01 5.825000000000000000e+01
1.500000000000000000e+01 6.425615384615382482e+02 2.916856994628906250e+02 3.382568359375000000e-01 0.000000000000000000e+00 0.000000000000000000e+00 2.283964355468750000e+03 2.117626667022705078e+00 5.000000000000000000e+00 1.000000000000000000e+00 2.084728240966796875e+02 5.425000000000000000e+01 5.825000000000000000e+01
4.200000000000000000e+01 6.547076923076922412e+02 3.047796325683593750e+02 1.808776855468750000e-01 0.000000000000000000e+00 0.000000000000000000e+00 2.261181396484375000e+03 2.120967149734497070e+00 5.000000000000000000e+00 3.000000000000000000e+00 1.499204864501953125e+02 5.475000000000000000e+01 5.825000000000000000e+01
6.800000000000000000e+01 6.778692307692308532e+02 3.205190429687500000e+02 -1.825256347656250000e-01 0.000000000000000000e+00 0.000000000000000000e+00 2.212809326171875000e+03 2.111278295516967773e+00 5.000000000000000000e+00 4.000000000000000000e+00 2.401099700927734375e+02 5.575000000000000000e+01 5.825000000000000000e+01
2.300000000000000000e+01 6.855000000000002274e+02 3.285722961425781250e+02 -3.642272949218750000e-01 0.000000000000000000e+00 2.941176593303680420e-01 2.188623291015625000e+03 2.110582351684570312e+00 5.000000000000000000e+00 3.000000000000000000e+00 1.714879455566406250e+02 5.625000000000000000e+01 5.825000000000000000e+01
6.500000000000000000e+01 6.877153846153846644e+02 3.735655822753906250e+02 -6.588439941406250000e-01 0.000000000000000000e+00 0.000000000000000000e+00 2.161366943359375000e+03 2.085429906845092773e+00 5.000000000000000000e+00 4.000000000000000000e+00 2.059947204589843750e+02 5.725000000000000000e+01 5.825000000000000000e+01
2.500000000000000000e+01 6.959307692307692150e+02 3.915508422851562500e+02 -8.061218261718750000e-01 0.000000000000000000e+00 0.000000000000000000e+00 2.147738769531250000e+03 2.054709434509277344e+00 5.000000000000000000e+00 3.000000000000000000e+00 1.398606414794921875e+02 5.775000000000000000e+01 5.825000000000000000e+01
6.600000000000000000e+01 7.023999999999998636e+02 3.830216064453125000e+02 -9.266357421875000000e-01 0.000000000000000000e+00 0.000000000000000000e+00 2.138799560546875000e+03 2.024821996688842773e+00 1.300000000000000000e+01 4.000000000000000000e+00 2.694266662597656250e+02 5.825000000000000000e+01 5.825000000000000000e+01
6.200000000000000000e+01 7.008384615384615017e+02 3.507511291503906250e+02 -9.667663574218750000e-01 0.000000000000000000e+00 0.000000000000000000e+00 2.143926513671875000e+03 1.998964309692382812e+00 1.300000000000000000e+01 4.000000000000000000e+00 3.885043640136718750e+02 5.875000000000000000e+01 5.825000000000000000e+01
6.800000000000000000e+01 6.744846153846153811e+02 3.082409362792968750e+02 -1.006896972656250000e+00 9.999999776482582092e-03 0.000000000000000000e+00 2.149053710937500000e+03 1.464597821235656738e+00 1.300000000000000000e+01 4.000000000000000000e+00 4.485921325683593750e+02 5.925000000000000000e+01 5.825000000000000000e+01
1.800000000000000000e+01 6.402692307692310578e+02 2.725144042968750000e+02 -1.047027587890625000e+00 0.000000000000000000e+00 0.000000000000000000e+00 2.154180664062500000e+03 1.844198584556579590e+00 1.300000000000000000e+01 1.000000000000000000e+00 2.652315979003906250e+02 5.975000000000000000e+01 5.825000000000000000e+01
5.500000000000000000e+01 6.159230769230770193e+02 2.617820129394531250e+02 -1.036834716796875000e+00 0.000000000000000000e+00 0.000000000000000000e+00 2.165863525390625000e+03 8.393776416778564453e-01 1.300000000000000000e+01 4.000000000000000000e+00 2.185968780517578125e+02 6.025000000000000000e+01 5.825000000000000000e+01
5.600000000000000000e+01 5.962923076923074177e+02 2.634707641601562500e+02 -9.762878417968750000e-01 0.000000000000000000e+00 2.352941185235977173e-01 2.184102050781250000e+03 8.473360538482666016e-01 1.300000000000000000e+01 4.000000000000000000e+00 1.629709625244140625e+02 6.075000000000000000e+01 5.825000000000000000e+01
6.200000000000000000e+01 5.753384615384613880e+02 2.668494262695312500e+02 -9.157714843750000000e-01 0.000000000000000000e+00 0.000000000000000000e+00 2.202340576171875000e+03 8.510273694992065430e-01 5.000000000000000000e+00 4.000000000000000000e+00 1.720407409667968750e+02 6.125000000000000000e+01 5.825000000000000000e+01
5.900000000000000000e+01 5.502153846153846644e+02 2.728659362792968750e+02 -7.774353027343750000e-01 0.000000000000000000e+00 0.000000000000000000e+00 2.238035644531250000e+03 8.577706813812255859e-01 5.000000000000000000e+00 4.000000000000000000e+00 1.160410003662109375e+02 6.225000000000000000e+01 5.825000000000000000e+01
6.000000000000000000e+01 5.435461538461537430e+02 2.762269592285156250e+02 -6.938476562500000000e-01 0.000000000000000000e+00 0.000000000000000000e+00 2.255231445312500000e+03 8.603562116622924805e-01 5.000000000000000000e+00 4.000000000000000000e+00 8.607324981689453125e+01 6.275000000000000000e+01 5.825000000000000000e+01
5.700000000000000000e+01 5.410230769230768146e+02 2.819064025878906250e+02 -6.102905273437500000e-01 0.000000000000000000e+00 0.000000000000000000e+00 2.272427246093750000e+03 8.606118559837341309e-01 5.000000000000000000e+00 4.000000000000000000e+00 8.208886718750000000e+01 6.325000000000000000e+01 5.825000000000000000e+01
5.800000000000000000e+01 5.402153846153846644e+02 2.874342651367187500e+02 -5.267028808593750000e-01 0.000000000000000000e+00 0.000000000000000000e+00 2.289623291015625000e+03 8.584407567977905273e-01 5.000000000000000000e+00 4.000000000000000000e+00 1.036580123901367188e+02 6.375000000000000000e+01 5.825000000000000000e+01
5.400000000000000000e+01 5.328307692307693060e+02 2.881664428710937500e+02 -5.189208984375000000e-01 0.000000000000000000e+00 0.000000000000000000e+00 2.296063476562500000e+03 8.588276505470275879e-01 5.000000000000000000e+00 4.000000000000000000e+00 1.071681137084960938e+02 6.425000000000000000e+01 5.825000000000000000e+01
5.900000000000000000e+01 5.258307692307691923e+02 2.875965576171875000e+02 -5.111389160156250000e-01 0.000000000000000000e+00 5.882353186607360840e-01 2.302503906250000000e+03 1.253956913948059082e+00 5.000000000000000000e+00 4.000000000000000000e+00 7.996055603027343750e+01 6.475000000000000000e+01 5.825000000000000000e+01
1.200000000000000000e+01 5.202230769230768601e+02 2.871022033691406250e+02 -5.033569335937500000e-01 0.000000000000000000e+00 2.941176593303680420e-01 2.308944091796875000e+03 2.761405229568481445e+00 6.000000000000000000e+00 1.000000000000000000e+00 5.752624893188476562e+01 6.525000000000000000e+01 5.825000000000000000e+01
1.000000000000000000e+01 5.192538461538463253e+02 2.796640014648437500e+02 -6.149902343750000000e-01 0.000000000000000000e+00 0.000000000000000000e+00 2.304510253906250000e+03 3.274067640304565430e+00 5.000000000000000000e+00 1.000000000000000000e+00 6.035826492309570312e+01 6.625000000000000000e+01 5.825000000000000000e+01
2.200000000000000000e+01 5.195153846153848463e+02 2.758400878906250000e+02 -7.089233398437500000e-01 0.000000000000000000e+00 0.000000000000000000e+00 2.297099121093750000e+03 2.993885278701782227e+00 1.500000000000000000e+01 3.000000000000000000e+00 5.926932907104492188e+01 6.675000000000000000e+01 5.825000000000000000e+01
3.600000000000000000e+01 7.309153846153844825e+02 3.764341430664062500e+02 2.013122558593750000e+00 0.000000000000000000e+00 0.000000000000000000e+00 2.477537597656250000e+03 3.103262901306152344e+00 5.000000000000000000e+00 3.000000000000000000e+00 1.961745758056640625e+02 3.375000000000000000e+01 5.875000000000000000e+01
5.000000000000000000e+01 7.166230769230768374e+02 3.673306579589843750e+02 1.893066406250000000e+00 0.000000000000000000e+00 0.000000000000000000e+00 2.461808593750000000e+03 3.284465789794921875e+00 5.000000000000000000e+00 4.000000000000000000e+00 1.813218383789062500e+02 3.425000000000000000e+01 5.875000000000000000e+01
7.000000000000000000e+00 6.978692307692307395e+02 3.491601867675781250e+02 1.772979736328125000e+00 0.000000000000000000e+00 0.000000000000000000e+00 2.446079589843750000e+03 2.691658258438110352e+00 5.000000000000000000e+00 1.000000000000000000e+00 1.621745758056640625e+02 3.475000000000000000e+01 5.875000000000000000e+01
5.300000000000000000e+01 7.175000000000001137e+02 3.289465942382812500e+02 1.652923583984375000e+00 0.000000000000000000e+00 5.882352963089942932e-02 2.430350585937500000e+03 2.110937833786010742e+00 5.000000000000000000e+00 4.000000000000000000e+00 1.872715911865234375e+02 3.525000000000000000e+01 5.875000000000000000e+01
5.800000000000000000e+01 6.929923076923079179e+02 3.149519958496093750e+02 1.540252685546875000e+00 0.000000000000000000e+00 0.000000000000000000e+00 2.415653320312500000e+03 2.117364645004272461e+00 5.000000000000000000e+00 4.000000000000000000e+00 1.272879028320312500e+02 3.575000000000000000e+01 5.875000000000000000e+01
1.200000000000000000e+01 6.915076923076919684e+02 3.148204650878906250e+02 1.449768066406250000e+00 0.000000000000000000e+00 0.000000000000000000e+00 2.404052246093750000e+03 2.150982379913330078e+00 5.000000000000000000e+00 1.000000000000000000e+00 1.329197998046875000e+02 3.625000000000000000e+01 5.875000000000000000e+01
9.000000000000000000e+00 6.938384615384615017e+02 3.238029479980468750e+02 1.359283447265625000e+00 0.000000000000000000e+00 1.176470592617988586e-01 2.392450927734375000e+03 3.226805686950683594e+00 6.000000000000000000e+00 1.000000000000000000e+00 1.225215759277343750e+02 3.675000000000000000e+01 5.875000000000000000e+01
5.700000000000000000e+01 6.069230769230767919e+02 3.391076049804687500e+02 1.154357910156250000e+00 0.000000000000000000e+00 0.000000000000000000e+00 2.380345703125000000e+03 3.295959472656250000e+00 5.000000000000000000e+00 4.000000000000000000e+00 1.817062683105468750e+02 3.875000000000000000e+01 5.875000000000000000e+01
5.000000000000000000e+01 5.662846153846152220e+02 3.173786926269531250e+02 1.114837646484375000e+00 0.000000000000000000e+00 5.882353186607360840e-01 2.384274169921875000e+03 3.287917852401733398e+00 5.000000000000000000e+00 4.000000000000000000e+00 1.555110778808593750e+02 3.975000000000000000e+01 5.875000000000000000e+01
2.800000000000000000e+01 5.805769230769230944e+02 3.095896301269531250e+02 1.108245849609375000e+00 0.000000000000000000e+00 1.117647051811218262e+00 2.385981201171875000e+03 3.290153026580810547e+00 5.000000000000000000e+00 3.000000000000000000e+00 1.779570922851562500e+02 4.025000000000000000e+01 5.875000000000000000e+01
5.900000000000000000e+01 5.749461538461536065e+02 3.028419189453125000e+02 1.101684570312500000e+00 0.000000000000000000e+00 5.294117927551269531e-01 2.387687988281250000e+03 3.299229860305786133e+00 5.000000000000000000e+00 4.000000000000000000e+00 1.762485351562500000e+02 4.075000000000000000e+01 5.875000000000000000e+01
6.900000000000000000e+01 5.646846153846155403e+02 3.003420104980468750e+02 1.095092773437500000e+00 0.000000000000000000e+00 0.000000000000000000e+00 2.389395019531250000e+03 3.309462308883666992e+00 5.000000000000000000e+00 4.000000000000000000e+00 1.475924377441406250e+02 4.125000000000000000e+01 5.875000000000000000e+01
6.100000000000000000e+01 5.879384615384616382e+02 3.028120117187500000e+02 1.055419921875000000e+00 0.000000000000000000e+00 0.000000000000000000e+00 2.386080322265625000e+03 3.297485113143920898e+00 5.000000000000000000e+00 4.000000000000000000e+00 1.767025451660156250e+02 4.175000000000000000e+01 5.875000000000000000e+01
4.500000000000000000e+01 5.958692307692308532e+02 3.129129333496093750e+02 1.015716552734375000e+00 0.000000000000000000e+00 0.000000000000000000e+00 2.382765380859375000e+03 3.279288053512573242e+00 5.000000000000000000e+00 4.000000000000000000e+00 2.112464294433593750e+02 4.225000000000000000e+01 5.875000000000000000e+01
2.300000000000000000e+01 5.781000000000001364e+02 3.279849853515625000e+02 9.760131835937500000e-01 0.000000000000000000e+00 0.000000000000000000e+00 2.379450683593750000e+03 3.272890806198120117e+00 5.000000000000000000e+00 3.000000000000000000e+00 1.958822631835937500e+02 4.275000000000000000e+01 5.875000000000000000e+01
6.800000000000000000e+01 5.613846153846153584e+02 3.405474548339843750e+02 9.243164062500000000e-01 0.000000000000000000e+00 0.000000000000000000e+00 2.374522705078125000e+03 3.274293422698974609e+00 5.000000000000000000e+00 4.000000000000000000e+00 1.685656738281250000e+02 4.325000000000000000e+01 5.875000000000000000e+01
6.800000000000000000e+01 5.389000000000000909e+02 3.468662414550781250e+02 8.367004394531250000e-01 0.000000000000000000e+00 0.000000000000000000e+00 2.364755371093750000e+03 3.281708002090454102e+00 5.000000000000000000e+00 4.000000000000000000e+00 2.165839233398437500e+02 4.375000000000000000e+01 5.875000000000000000e+01
4.500000000000000000e+01 5.242384615384613653e+02 3.475458068847656250e+02 7.490539550781250000e-01 0.000000000000000000e+00 0.000000000000000000e+00 2.354987792968750000e+03 3.296439170837402344e+00 5.000000000000000000e+00 4.000000000000000000e+00 1.870401000976562500e+02 4.425000000000000000e+01 5.875000000000000000e+01
6.200000000000000000e+01 5.586076923076923322e+02 3.490307312011718750e+02 6.614074707031250000e-01 0.000000000000000000e+00 0.000000000000000000e+00 2.345220458984375000e+03 1.433943986892700195e+00 5.000000000000000000e+00 4.000000000000000000e+00 1.875063629150390625e+02 4.475000000000000000e+01 5.875000000000000000e+01
3.200000000000000000e+01 5.975153846153845052e+02 3.496128540039062500e+02 5.911560058593750000e-01 0.000000000000000000e+00 0.000000000000000000e+00 2.336927490234375000e+03 1.217260003089904785e+00 5.000000000000000000e+00 3.000000000000000000e+00 1.775136108398437500e+02 4.525000000000000000e+01 5.875000000000000000e+01
6.500000000000000000e+01 6.186230769230767237e+02 3.493001403808593750e+02 5.382690429687500000e-01 0.000000000000000000e+00 0.000000000000000000e+00 2.330108642578125000e+03 3.323995351791381836e+00 5.000000000000000000e+00 4.000000000000000000e+00 1.312960662841796875e+02 4.575000000000000000e+01 5.875000000000000000e+01
5.800000000000000000e+01 6.183615384615384301e+02 3.451324768066406250e+02 4.853820800781250000e-01 0.000000000000000000e+00 0.000000000000000000e+00 2.323290039062500000e+03 2.944665431976318359e+00 5.000000000000000000e+00 4.000000000000000000e+00 1.376653747558593750e+02 4.625000000000000000e+01 5.875000000000000000e+01
5.400000000000000000e+01 6.142692307692307168e+02 3.401723632812500000e+02 4.324951171875000000e-01 0.000000000000000000e+00 0.000000000000000000e+00 2.316471435546875000e+03 2.900359630584716797e+00 5.000000000000000000e+00 4.000000000000000000e+00 1.312688598632812500e+02 4.675000000000000000e+01 5.875000000000000000e+01
6.300000000000000000e+01 6.252076923076924686e+02 3.414333496093750000e+02 4.118347167968750000e-01 0.000000000000000000e+00 0.000000000000000000e+00 2.313896728515625000e+03 2.783296346664428711e+00 5.000000000000000000e+00 4.000000000000000000e+00 1.786215515136718750e+02 4.725000000000000000e+01 5.875000000000000000e+01
6.400000000000000000e+01 6.366923076923077360e+02 3.498565063476562500e+02 4.019470214843750000e-01 0.000000000000000000e+00 0.000000000000000000e+00 2.312736816406250000e+03 3.336495876312255859e+00 5.000000000000000000e+00 4.000000000000000000e+00 1.695809020996093750e+02 4.775000000000000000e+01 5.875000000000000000e+01
6.000000000000000000e+01 6.439461538461539476e+02 3.629305725097656250e+02 3.920288085937500000e-01 0.000000000000000000e+00 0.000000000000000000e+00 2.311576904296875000e+03 2.349316120147705078e+00 5.000000000000000000e+00 4.000000000000000000e+00 1.848694305419921875e+02 4.825000000000000000e+01 5.875000000000000000e+01
5.800000000000000000e+01 6.512461538461541295e+02 3.737740173339843750e+02 3.821411132812500000e-01 0.000000000000000000e+00 0.000000000000000000e+00 2.310416992187500000e+03 2.093451976776123047e+00 5.000000000000000000e+00 4.000000000000000000e+00 1.634170227050781250e+02 4.875000000000000000e+01 5.875000000000000000e+01
5.900000000000000000e+01 6.452769230769229125e+02 3.793456726074218750e+02 4.060363769531250000e-01 0.000000000000000000e+00 0.000000000000000000e+00 2.312632324218750000e+03 2.155833721160888672e+00 5.000000000000000000e+00 4.000000000000000000e+00 1.220771636962890625e+02 4.925000000000000000e+01 5.875000000000000000e+01
5.500000000000000000e+01 6.394307692307694424e+02 3.806810913085937500e+02 4.299621582031250000e-01 0.000000000000000000e+00 2.941176593303680420e-01 2.314847900390625000e+03 2.152614831924438477e+00 5.000000000000000000e+00 4.000000000000000000e+00 1.431834259033203125e+02 4.975000000000000000e+01 5.875000000000000000e+01
5.900000000000000000e+01 6.402384615384617064e+02 3.775139160156250000e+02 4.538574218750000000e-01 0.000000000000000000e+00 6.470588445663452148e-01 2.317063232421875000e+03 2.143123626708984375e+00 8.000000000000000000e+00 4.000000000000000000e+00 1.225436782836914062e+02 5.025000000000000000e+01 5.875000000000000000e+01
3.800000000000000000e+01 6.321230769230770647e+02 3.662602233886718750e+02 4.634094238281250000e-01 0.000000000000000000e+00 2.941176593303680420e-01 2.316684326171875000e+03 2.135740280151367188e+00 5.000000000000000000e+00 3.000000000000000000e+00 1.490340270996093750e+02 5.075000000000000000e+01 5.875000000000000000e+01
6.300000000000000000e+01 6.229076923076924004e+02 3.427176818847656250e+02 4.299621582031250000e-01 0.000000000000000000e+00 0.000000000000000000e+00 2.308522705078125000e+03 2.126642227172851562e+00 5.000000000000000000e+00 4.000000000000000000e+00 1.909853820800781250e+02 5.125000000000000000e+01 5.875000000000000000e+01
5.900000000000000000e+01 6.199538461538461434e+02 3.130573120117187500e+02 3.964843750000000000e-01 0.000000000000000000e+00 0.000000000000000000e+00 2.300361083984375000e+03 2.116771221160888672e+00 5.000000000000000000e+00 4.000000000000000000e+00 2.236072387695312500e+02 5.175000000000000000e+01 5.875000000000000000e+01
3.400000000000000000e+01 6.199153846153847098e+02 2.905416564941406250e+02 3.630065917968750000e-01 0.000000000000000000e+00 0.000000000000000000e+00 2.292199462890625000e+03 2.111033916473388672e+00 5.000000000000000000e+00 3.000000000000000000e+00 2.045632629394531250e+02 5.225000000000000000e+01 5.875000000000000000e+01
6.600000000000000000e+01 6.308384615384618428e+02 2.792680664062500000e+02 2.964782714843750000e-01 0.000000000000000000e+00 0.000000000000000000e+00 2.278826171875000000e+03 2.093890190124511719e+00 5.000000000000000000e+00 4.000000000000000000e+00 2.734517517089843750e+02 5.275000000000000000e+01 5.875000000000000000e+01
5.200000000000000000e+01 6.399307692307696698e+02 2.807373352050781250e+02 1.968994140625000000e-01 0.000000000000000000e+00 0.000000000000000000e+00 2.260241210937500000e+03 2.070679426193237305e+00 5.000000000000000000e+00 4.000000000000000000e+00 2.136448974609375000e+02 5.325000000000000000e+01 5.875000000000000000e+01
7.000000000000000000e+01 6.473999999999997499e+02 2.934902954101562500e+02 9.732055664062500000e-02 0.000000000000000000e+00 0.000000000000000000e+00 2.241656250000000000e+03 2.065383195877075195e+00 5.000000000000000000e+00 4.000000000000000000e+00 2.646961364746093750e+02 5.375000000000000000e+01 5.875000000000000000e+01
5.200000000000000000e+01 6.571461538461542204e+02 3.062827453613281250e+02 -2.258300781250000000e-03 0.000000000000000000e+00 0.000000000000000000e+00 2.223071533203125000e+03 2.077979803085327148e+00 5.000000000000000000e+00 4.000000000000000000e+00 2.321159820556640625e+02 5.425000000000000000e+01 5.875000000000000000e+01
2.400000000000000000e+01 6.669384615384614108e+02 3.142617187500000000e+02 -1.697998046875000000e-01 0.000000000000000000e+00 0.000000000000000000e+00 2.200914550781250000e+03 2.085484266281127930e+00 5.000000000000000000e+00 3.000000000000000000e+00 1.954228515625000000e+02 5.475000000000000000e+01 5.875000000000000000e+01
7.000000000000000000e+01 6.753846153846152447e+02 3.186902160644531250e+02 -3.599548339843750000e-01 0.000000000000000000e+00 2.352941185235977173e-01 2.177566894531250000e+03 2.086969375610351562e+00 5.000000000000000000e+00 4.000000000000000000e+00 1.955593872070312500e+02 5.525000000000000000e+01 5.875000000000000000e+01
6.300000000000000000e+01 7.005769230769229807e+02 3.370549316406250000e+02 -8.854064941406250000e-01 0.000000000000000000e+00 0.000000000000000000e+00 2.116869628906250000e+03 2.063820600509643555e+00 5.000000000000000000e+00 4.000000000000000000e+00 1.541790313720703125e+02 5.675000000000000000e+01 5.875000000000000000e+01
6.200000000000000000e+01 7.054307692307692150e+02 3.552412719726562500e+02 -1.030487060546875000e+00 0.000000000000000000e+00 0.000000000000000000e+00 2.102867675781250000e+03 2.034235715866088867e+00 5.000000000000000000e+00 4.000000000000000000e+00 2.140610809326171875e+02 5.725000000000000000e+01 5.875000000000000000e+01
2.800000000000000000e+01 7.058153846153848008e+02 3.607890319824218750e+02 -1.175598144531250000e+00 0.000000000000000000e+00 0.000000000000000000e+00 2.088865722656250000e+03 1.995212197303771973e+00 1.300000000000000000e+01 3.000000000000000000e+00 2.892728576660156250e+02 5.775000000000000000e+01 5.875000000000000000e+01
6.000000000000000000e+01 7.043923076923081226e+02 3.424158020019531250e+02 -1.293914794921875000e+00 9.999999776482582092e-03 2.941176593303680420e-01 2.079409667968750000e+03 1.955475449562072754e+00 1.300000000000000000e+01 4.000000000000000000e+00 3.947969360351562500e+02 5.825000000000000000e+01 5.875000000000000000e+01
5.200000000000000000e+01 7.114153846153845961e+02 3.139380798339843750e+02 -1.331878662109375000e+00 9.999999776482582092e-03 2.941176593303680420e-01 2.083592529296875000e+03 1.928007125854492188e+00 1.300000000000000000e+01 4.000000000000000000e+00 5.057106018066406250e+02 5.875000000000000000e+01 5.875000000000000000e+01
7.200000000000000000e+01 6.757615384615384073e+02 2.908688964843750000e+02 -1.369842529296875000e+00 9.999999776482582092e-03 0.000000000000000000e+00 2.087775390625000000e+03 1.944214582443237305e+00 1.300000000000000000e+01 4.000000000000000000e+00 3.493111877441406250e+02 5.925000000000000000e+01 5.875000000000000000e+01
6.300000000000000000e+01 6.346153846153843006e+02 2.792735900878906250e+02 -1.407806396484375000e+00 0.000000000000000000e+00 2.352941185235977173e-01 2.091958251953125000e+03 1.650669097900390625e+00 1.300000000000000000e+01 4.000000000000000000e+00 2.083852081298828125e+02 5.975000000000000000e+01 5.875000000000000000e+01
6.500000000000000000e+01 6.093000000000000682e+02 2.784435424804687500e+02 -1.391723632812500000e+00 0.000000000000000000e+00 0.000000000000000000e+00 2.103203613281250000e+03 8.277737498283386230e-01 1.300000000000000000e+01 4.000000000000000000e+00 1.695592956542968750e+02 6.025000000000000000e+01 5.875000000000000000e+01
6.500000000000000000e+01 5.923230769230771102e+02 2.827306823730468750e+02 -1.321624755859375000e+00 0.000000000000000000e+00 2.352941185235977173e-01 2.121511230468750000e+03 8.366531729698181152e-01 1.300000000000000000e+01 4.000000000000000000e+00 1.452493591308593750e+02 6.075000000000000000e+01 5.875000000000000000e+01
5.200000000000000000e+01 5.715153846153848463e+02 2.799423522949218750e+02 -1.251495361328125000e+00 0.000000000000000000e+00 0.000000000000000000e+00 2.139819091796875000e+03 8.402698636054992676e-01 5.000000000000000000e+00 4.000000000000000000e+00 9.974253845214843750e+01 6.125000000000000000e+01 5.875000000000000000e+01
3.400000000000000000e+01 5.568615384615379753e+02 2.693306579589843750e+02 -1.091918945312500000e+00 0.000000000000000000e+00 2.352941185235977173e-01 2.175398925781250000e+03 8.464187979698181152e-01 5.000000000000000000e+00 3.000000000000000000e+00 9.687400054931640625e+01 6.225000000000000000e+01 5.875000000000000000e+01
5.800000000000000000e+01 5.481384615384614563e+02 2.685265197753906250e+02 -9.960632324218750000e-01 0.000000000000000000e+00 5.882353186607360840e-01 2.192325683593750000e+03 8.468832969665527344e-01 5.000000000000000000e+00 4.000000000000000000e+00 1.061173858642578125e+02 6.275000000000000000e+01 5.875000000000000000e+01
2.200000000000000000e+01 5.457230769230769738e+02 2.700790100097656250e+02 -9.002075195312500000e-01 0.000000000000000000e+00 0.000000000000000000e+00 2.209252197265625000e+03 8.469933867454528809e-01 5.000000000000000000e+00 3.000000000000000000e+00 1.271916427612304688e+02 6.325000000000000000e+01 5.875000000000000000e+01
9.000000000000000000e+00 5.477384615384614790e+02 2.737886352539062500e+02 -8.043518066406250000e-01 0.000000000000000000e+00 0.000000000000000000e+00 2.226178955078125000e+03 8.466437458992004395e-01 5.000000000000000000e+00 1.000000000000000000e+00 9.450511932373046875e+01 6.375000000000000000e+01 5.875000000000000000e+01
6.000000000000000000e+01 5.460615384615383618e+02 2.771153869628906250e+02 -7.884216308593750000e-01 0.000000000000000000e+00 5.882353186607360840e-01 2.232192382812500000e+03 8.477273583412170410e-01 5.000000000000000000e+00 4.000000000000000000e+00 7.064378356933593750e+01 6.425000000000000000e+01 5.875000000000000000e+01
6.200000000000000000e+01 5.423230769230766555e+02 2.794602050781250000e+02 -7.724609375000000000e-01 0.000000000000000000e+00 0.000000000000000000e+00 2.238206054687500000e+03 8.464688062667846680e-01 5.000000000000000000e+00 4.000000000000000000e+00 8.312651824951171875e+01 6.475000000000000000e+01 5.875000000000000000e+01
7.000000000000000000e+01 5.315923076923077133e+02 2.809816894531250000e+02 -7.565307617187500000e-01 0.000000000000000000e+00 0.000000000000000000e+00 2.244219482421875000e+03 1.390259385108947754e+00 1.500000000000000000e+01 4.000000000000000000e+00 8.624732971191406250e+01 6.525000000000000000e+01 5.875000000000000000e+01
5.000000000000000000e+00 5.287615384615384073e+02 2.801457519531250000e+02 -7.667846679687500000e-01 0.000000000000000000e+00 0.000000000000000000e+00 2.246975341796875000e+03 1.305240631103515625e+00 1.500000000000000000e+01 1.000000000000000000e+00 8.818428802490234375e+01 6.575000000000000000e+01 5.875000000000000000e+01
4.100000000000000000e+01 5.317538461538458705e+02 2.795171203613281250e+02 -8.556518554687500000e-01 0.000000000000000000e+00 2.941176593303680420e-01 2.239958496093750000e+03 1.602842211723327637e+00 5.000000000000000000e+00 3.000000000000000000e+00 7.803895568847656250e+01 6.625000000000000000e+01 5.875000000000000000e+01
4.200000000000000000e+01 5.288692307692308532e+02 2.781909179687500000e+02 -9.445190429687500000e-01 0.000000000000000000e+00 0.000000000000000000e+00 2.232941406250000000e+03 1.394774436950683594e+00 1.500000000000000000e+01 3.000000000000000000e+00 6.088796234130859375e+01 6.675000000000000000e+01 5.875000000000000000e+01
3.100000000000000000e+01 5.396769230769230035e+02 2.774783325195312500e+02 -1.033386230468750000e+00 0.000000000000000000e+00 0.000000000000000000e+00 2.225924560546875000e+03 8.397428989410400391e-01 1.500000000000000000e+01 3.000000000000000000e+00 4.773306655883789062e+01 6.725000000000000000e+01 5.875000000000000000e+01
5.400000000000000000e+01 7.028615384615387711e+02 3.990088806152343750e+02 2.060394287109375000e+00 0.000000000000000000e+00 2.941176593303680420e-01 2.487799072265625000e+03 2.110341072082519531e+00 1.500000000000000000e+01 4.000000000000000000e+00 8.985993194580078125e+01 3.325000000000000000e+01 5.925000000000000000e+01
5.600000000000000000e+01 7.191615384615387256e+02 3.946070251464843750e+02 1.851409912109375000e+00 0.000000000000000000e+00 0.000000000000000000e+00 2.447933349609375000e+03 2.151808500289916992e+00 5.000000000000000000e+00 4.000000000000000000e+00 1.825098419189453125e+02 3.375000000000000000e+01 5.925000000000000000e+01
5.300000000000000000e+01 7.425615384615387029e+02 3.752196350097656250e+02 1.742309570312500000e+00 0.000000000000000000e+00 5.882352963089942932e-02 2.430577392578125000e+03 2.469222068786621094e+00 5.000000000000000000e+00 4.000000000000000000e+00 1.794024505615234375e+02 3.425000000000000000e+01 5.925000000000000000e+01
4.400000000000000000e+01 7.381692307692303530e+02 3.407814025878906250e+02 1.633209228515625000e+00 0.000000000000000000e+00 0.000000000000000000e+00 2.413221679687500000e+03 2.073542833328247070e+00 5.000000000000000000e+00 3.000000000000000000e+00 1.605072479248046875e+02 3.475000000000000000e+01 5.925000000000000000e+01
5.600000000000000000e+01 7.153846153846153584e+02 2.804276123046875000e+02 1.420562744140625000e+00 0.000000000000000000e+00 0.000000000000000000e+00 2.380188476562500000e+03 2.093544006347656250e+00 5.000000000000000000e+00 4.000000000000000000e+00 1.364587402343750000e+02 3.575000000000000000e+01 5.925000000000000000e+01
5.900000000000000000e+01 7.034076923076924004e+02 2.828388671875000000e+02 1.333557128906250000e+00 0.000000000000000000e+00 1.176470592617988586e-01 2.369547851562500000e+03 2.902625799179077148e+00 6.000000000000000000e+00 4.000000000000000000e+00 1.282598266601562500e+02 3.625000000000000000e+01 5.925000000000000000e+01
5.000000000000000000e+00 6.742692307692310578e+02 3.271069641113281250e+02 1.159576416015625000e+00 0.000000000000000000e+00 0.000000000000000000e+00 2.348266601562500000e+03 3.258560419082641602e+00 6.000000000000000000e+00 1.000000000000000000e+00 1.151322860717773438e+02 3.725000000000000000e+01 5.925000000000000000e+01
4.300000000000000000e+01 6.236461538461536520e+02 3.473709411621093750e+02 1.055755615234375000e+00 0.000000000000000000e+00 0.000000000000000000e+00 2.341519775390625000e+03 3.254940509796142578e+00 6.000000000000000000e+00 3.000000000000000000e+00 1.373529052734375000e+02 3.825000000000000000e+01 5.925000000000000000e+01
5.500000000000000000e+01 6.113230769230769965e+02 3.354511718750000000e+02 1.015502929687500000e+00 0.000000000000000000e+00 7.647058963775634766e-01 2.340568603515625000e+03 3.240606307983398438e+00 5.000000000000000000e+00 4.000000000000000000e+00 1.886121368408203125e+02 3.875000000000000000e+01 5.925000000000000000e+01
4.300000000000000000e+01 6.058230769230772239e+02 3.186624450683593750e+02 9.752807617187500000e-01 0.000000000000000000e+00 2.352941185235977173e-01 2.339617675781250000e+03 3.228580474853515625e+00 5.000000000000000000e+00 3.000000000000000000e+00 1.877901458740234375e+02 3.925000000000000000e+01 5.925000000000000000e+01
4.100000000000000000e+01 5.776461538461541068e+02 3.081176452636718750e+02 8.753051757812500000e-01 0.000000000000000000e+00 0.000000000000000000e+00 2.339321777343750000e+03 3.243733882904052734e+00 5.000000000000000000e+00 3.000000000000000000e+00 1.480280303955078125e+02 4.125000000000000000e+01 5.925000000000000000e+01
6.400000000000000000e+01 5.907461538461536747e+02 3.131732788085937500e+02 8.248596191406250000e-01 0.000000000000000000e+00 0.000000000000000000e+00 2.334571044921875000e+03 3.238040447235107422e+00 5.000000000000000000e+00 4.000000000000000000e+00 1.377903594970703125e+02 4.175000000000000000e+01 5.925000000000000000e+01
5.300000000000000000e+01 5.941230769230768374e+02 3.226076049804687500e+02 7.744140625000000000e-01 0.000000000000000000e+00 0.000000000000000000e+00 2.329820068359375000e+03 3.233687162399291992e+00 5.000000000000000000e+00 4.000000000000000000e+00 1.642477569580078125e+02 4.225000000000000000e+01 5.925000000000000000e+01
5.100000000000000000e+01 5.873000000000004093e+02 3.311020202636718750e+02 7.239685058593750000e-01 0.000000000000000000e+00 0.000000000000000000e+00 2.325069335937500000e+03 3.230737686157226562e+00 5.000000000000000000e+00 4.000000000000000000e+00 2.034891662597656250e+02 4.275000000000000000e+01 5.925000000000000000e+01
6.100000000000000000e+01 5.656692307692305803e+02 3.396022338867187500e+02 6.657714843750000000e-01 0.000000000000000000e+00 0.000000000000000000e+00 2.319262939453125000e+03 2.543617486953735352e+00 5.000000000000000000e+00 4.000000000000000000e+00 1.803736267089843750e+02 4.325000000000000000e+01 5.925000000000000000e+01
5.200000000000000000e+01 5.533692307692306258e+02 3.448568115234375000e+02 5.842590332031250000e-01 0.000000000000000000e+00 0.000000000000000000e+00 2.310290039062500000e+03 1.018553495407104492e+00 5.000000000000000000e+00 4.000000000000000000e+00 1.434225158691406250e+02 4.375000000000000000e+01 5.925000000000000000e+01
5.200000000000000000e+01 5.601153846153846416e+02 3.490783996582031250e+02 5.027465820312500000e-01 0.000000000000000000e+00 0.000000000000000000e+00 2.301317382812500000e+03 8.509114384651184082e-01 5.000000000000000000e+00 4.000000000000000000e+00 1.751923675537109375e+02 4.425000000000000000e+01 5.925000000000000000e+01
5.400000000000000000e+01 5.723923076923074404e+02 3.510656738281250000e+02 4.212646484375000000e-01 0.000000000000000000e+00 0.000000000000000000e+00 2.292344482421875000e+03 8.930989503860473633e-01 5.000000000000000000e+00 4.000000000000000000e+00 1.676926574707031250e+02 4.475000000000000000e+01 5.925000000000000000e+01
6.300000000000000000e+01 5.971692307692309214e+02 3.530091552734375000e+02 3.562927246093750000e-01 0.000000000000000000e+00 0.000000000000000000e+00 2.284591552734375000e+03 8.528181314468383789e-01 5.000000000000000000e+00 4.000000000000000000e+00 1.869293212890625000e+02 4.525000000000000000e+01 5.925000000000000000e+01
6.200000000000000000e+01 6.247384615384615927e+02 3.535592041015625000e+02 3.079223632812500000e-01 0.000000000000000000e+00 0.000000000000000000e+00 2.278058593750000000e+03 8.539854288101196289e-01 5.000000000000000000e+00 4.000000000000000000e+00 2.067443389892578125e+02 4.575000000000000000e+01 5.925000000000000000e+01
4.100000000000000000e+01 6.140923076923071449e+02 3.526661987304687500e+02 2.595214843750000000e-01 0.000000000000000000e+00 0.000000000000000000e+00 2.271525634765625000e+03 1.301222562789916992e+00 5.000000000000000000e+00 3.000000000000000000e+00 2.093155059814453125e+02 4.625000000000000000e+01 5.925000000000000000e+01
5.500000000000000000e+01 6.176846153846151992e+02 3.543083190917968750e+02 2.111206054687500000e-01 0.000000000000000000e+00 0.000000000000000000e+00 2.264992431640625000e+03 2.173421144485473633e+00 5.000000000000000000e+00 4.000000000000000000e+00 1.532863616943359375e+02 4.675000000000000000e+01 5.925000000000000000e+01
6.900000000000000000e+01 6.135230769230769283e+02 3.580564270019531250e+02 1.929626464843750000e-01 0.000000000000000000e+00 2.941176593303680420e-01 2.262479980468750000e+03 2.109743356704711914e+00 5.000000000000000000e+00 4.000000000000000000e+00 2.024979400634765625e+02 4.725000000000000000e+01 5.925000000000000000e+01
6.400000000000000000e+01 6.379538461538462570e+02 3.713827819824218750e+02 1.767578125000000000e-01 0.000000000000000000e+00 0.000000000000000000e+00 2.260134765625000000e+03 2.111278533935546875e+00 5.000000000000000000e+00 4.000000000000000000e+00 1.726443939208984375e+02 4.825000000000000000e+01 5.925000000000000000e+01
4.600000000000000000e+01 6.385384615384615472e+02 3.757373352050781250e+02 1.686706542968750000e-01 0.000000000000000000e+00 0.000000000000000000e+00 2.258962402343750000e+03 2.056330680847167969e+00 5.000000000000000000e+00 4.000000000000000000e+00 1.867737274169921875e+02 4.875000000000000000e+01 5.925000000000000000e+01
5.900000000000000000e+01 6.382692307692307168e+02 3.769779663085937500e+02 1.813659667968750000e-01 0.000000000000000000e+00 0.000000000000000000e+00 2.259540283203125000e+03 9.849424958229064941e-01 5.000000000000000000e+00 4.000000000000000000e+00 1.849240570068359375e+02 4.925000000000000000e+01 5.925000000000000000e+01
7.000000000000000000e+01 6.362000000000002728e+02 3.778041687011718750e+02 1.940917968750000000e-01 0.000000000000000000e+00 0.000000000000000000e+00 2.260117919921875000e+03 9.472705721855163574e-01 5.000000000000000000e+00 4.000000000000000000e+00 1.581239013671875000e+02 4.975000000000000000e+01 5.925000000000000000e+01
6.400000000000000000e+01 6.362384615384614790e+02 3.767717895507812500e+02 2.067871093750000000e-01 0.000000000000000000e+00 0.000000000000000000e+00 2.260695800781250000e+03 1.628709554672241211e+00 5.000000000000000000e+00 4.000000000000000000e+00 2.043951568603515625e+02 5.025000000000000000e+01 5.925000000000000000e+01
5.500000000000000000e+01 6.336307692307692605e+02 3.669751892089843750e+02 1.637268066406250000e-01 0.000000000000000000e+00 0.000000000000000000e+00 2.249840820312500000e+03 1.387392997741699219e+00 8.000000000000000000e+00 4.000000000000000000e+00 1.451072845458984375e+02 5.125000000000000000e+01 5.925000000000000000e+01
3.900000000000000000e+01 6.314538461538461434e+02 3.592610168457031250e+02 1.216735839843750000e-01 0.000000000000000000e+00 0.000000000000000000e+00 2.240810302734375000e+03 1.896001458168029785e+00 5.000000000000000000e+00 3.000000000000000000e+00 1.984318237304687500e+02 5.175000000000000000e+01 5.925000000000000000e+01
5.600000000000000000e+01 6.308923076923080089e+02 3.540403137207031250e+02 7.962036132812500000e-02 0.000000000000000000e+00 0.000000000000000000e+00 2.231779785156250000e+03 1.387900471687316895e+00 5.000000000000000000e+00 4.000000000000000000e+00 1.894092102050781250e+02 5.225000000000000000e+01 5.925000000000000000e+01
6.300000000000000000e+01 6.365769230769229807e+02 3.476006469726562500e+02 1.251220703125000000e-03 0.000000000000000000e+00 5.294117927551269531e-01 2.217966308593750000e+03 1.186849355697631836e+00 5.000000000000000000e+00 4.000000000000000000e+00 2.036829528808593750e+02 5.275000000000000000e+01 5.925000000000000000e+01
6.800000000000000000e+01 6.446076923076924459e+02 3.379951782226562500e+02 -1.134338378906250000e-01 0.000000000000000000e+00 0.000000000000000000e+00 2.199370361328125000e+03 2.039772272109985352e+00 5.000000000000000000e+00 4.000000000000000000e+00 2.928047485351562500e+02 5.325000000000000000e+01 5.925000000000000000e+01
6.800000000000000000e+01 6.576923076923077360e+02 3.325545349121093750e+02 -2.281188964843750000e-01 0.000000000000000000e+00 0.000000000000000000e+00 2.180774414062500000e+03 2.042809486389160156e+00 5.000000000000000000e+00 4.000000000000000000e+00 2.949500427246093750e+02 5.375000000000000000e+01 5.925000000000000000e+01
7.100000000000000000e+01 6.851307692307689194e+02 3.340773925781250000e+02 -7.190856933593750000e-01 0.000000000000000000e+00 0.000000000000000000e+00 2.118138671875000000e+03 1.792225837707519531e+00 5.000000000000000000e+00 4.000000000000000000e+00 1.867568511962890625e+02 5.525000000000000000e+01 5.925000000000000000e+01
6.100000000000000000e+01 6.955461538461538566e+02 3.385348205566406250e+02 -9.177551269531250000e-01 0.000000000000000000e+00 0.000000000000000000e+00 2.095629394531250000e+03 2.054423332214355469e+00 5.000000000000000000e+00 4.000000000000000000e+00 1.905123443603515625e+02 5.575000000000000000e+01 5.925000000000000000e+01
6.000000000000000000e+01 7.020153846153843915e+02 3.616456298828125000e+02 -1.259277343750000000e+00 0.000000000000000000e+00 0.000000000000000000e+00 2.058744384765625000e+03 2.043843984603881836e+00 5.000000000000000000e+00 4.000000000000000000e+00 1.420536041259765625e+02 5.675000000000000000e+01 5.925000000000000000e+01
5.500000000000000000e+01 7.060846153846152902e+02 3.735419921875000000e+02 -1.402160644531250000e+00 0.000000000000000000e+00 0.000000000000000000e+00 2.044368408203125000e+03 2.015922307968139648e+00 5.000000000000000000e+00 4.000000000000000000e+00 1.839932098388671875e+02 5.725000000000000000e+01 5.925000000000000000e+01
6.700000000000000000e+01 7.012999999999999545e+02 3.691727600097656250e+02 -1.545043945312500000e+00 9.999999776482582092e-03 0.000000000000000000e+00 2.029992431640625000e+03 1.964912295341491699e+00 1.300000000000000000e+01 4.000000000000000000e+00 3.284072875976562500e+02 5.775000000000000000e+01 5.925000000000000000e+01
5.800000000000000000e+01 6.996076923076925596e+02 3.312251281738281250e+02 -1.661163330078125000e+00 9.999999776482582092e-03 0.000000000000000000e+00 2.020020019531250000e+03 1.906857371330261230e+00 1.300000000000000000e+01 4.000000000000000000e+00 5.906577148437500000e+02 5.825000000000000000e+01 5.925000000000000000e+01
1.900000000000000000e+01 6.952230769230767464e+02 2.971867675781250000e+02 -1.696990966796875000e+00 1.331391036510467529e-01 0.000000000000000000e+00 2.023258666992187500e+03 1.847176909446716309e+00 1.300000000000000000e+01 1.000000000000000000e+00 5.922285156250000000e+02 5.875000000000000000e+01 5.925000000000000000e+01
6.300000000000000000e+01 6.604461538461536065e+02 2.795592956542968750e+02 -1.732788085937500000e+00 9.999999776482582092e-03 0.000000000000000000e+00 2.026497192382812500e+03 9.401349425315856934e-01 1.300000000000000000e+01 4.000000000000000000e+00 4.118330383300781250e+02 5.925000000000000000e+01 5.925000000000000000e+01
7.300000000000000000e+01 6.126538461538459615e+02 2.731212158203125000e+02 -1.768615722656250000e+00 0.000000000000000000e+00 0.000000000000000000e+00 2.029735717773437500e+03 7.986465096473693848e-01 1.300000000000000000e+01 4.000000000000000000e+00 2.359416656494140625e+02 5.975000000000000000e+01 5.925000000000000000e+01
6.600000000000000000e+01 5.855538461538458250e+02 2.751499938964843750e+02 -1.746643066406250000e+00 0.000000000000000000e+00 0.000000000000000000e+00 2.040543579101562500e+03 8.206409811973571777e-01 1.300000000000000000e+01 4.000000000000000000e+00 1.262553253173828125e+02 6.025000000000000000e+01 5.925000000000000000e+01
3.900000000000000000e+01 5.749692307692309896e+02 2.754980773925781250e+02 -1.666931152343750000e+00 0.000000000000000000e+00 0.000000000000000000e+00 2.058920654296875000e+03 8.270869255065917969e-01 1.300000000000000000e+01 3.000000000000000000e+00 1.384767608642578125e+02 6.075000000000000000e+01 5.925000000000000000e+01
6.500000000000000000e+01 5.645538461538459387e+02 2.714417724609375000e+02 -1.587188720703125000e+00 0.000000000000000000e+00 2.352941185235977173e-01 2.077297607421875000e+03 1.008882403373718262e+00 5.000000000000000000e+00 4.000000000000000000e+00 8.678304290771484375e+01 6.125000000000000000e+01 5.925000000000000000e+01
3.300000000000000000e+01 5.515692307692306713e+02 2.558497924804687500e+02 -1.406433105468750000e+00 0.000000000000000000e+00 2.352941185235977173e-01 2.112762207031250000e+03 8.352748751640319824e-01 5.000000000000000000e+00 3.000000000000000000e+00 6.806597900390625000e+01 6.225000000000000000e+01 5.925000000000000000e+01
6.900000000000000000e+01 5.471538461538459615e+02 2.525864105224609375e+02 -1.298309326171875000e+00 0.000000000000000000e+00 0.000000000000000000e+00 2.129419677734375000e+03 8.345486521720886230e-01 5.000000000000000000e+00 4.000000000000000000e+00 1.229303436279296875e+02 6.275000000000000000e+01 5.925000000000000000e+01
6.600000000000000000e+01 5.457846153846155630e+02 2.521661834716796875e+02 -1.190155029296875000e+00 0.000000000000000000e+00 0.000000000000000000e+00 2.146077148437500000e+03 8.369238972663879395e-01 5.000000000000000000e+00 4.000000000000000000e+00 9.529514312744140625e+01 6.325000000000000000e+01 5.925000000000000000e+01
6.600000000000000000e+01 5.445692307692307850e+02 2.518495788574218750e+02 -1.082000732421875000e+00 0.000000000000000000e+00 0.000000000000000000e+00 2.162734619140625000e+03 1.254956126213073730e+00 5.000000000000000000e+00 4.000000000000000000e+00 8.166084289550781250e+01 6.375000000000000000e+01 5.925000000000000000e+01
6.600000000000000000e+01 5.459076923076925141e+02 2.533191375732421875e+02 -1.057891845703125000e+00 0.000000000000000000e+00 5.294117927551269531e-01 2.168321289062500000e+03 1.249271750450134277e+00 5.000000000000000000e+00 4.000000000000000000e+00 7.611502075195312500e+01 6.425000000000000000e+01 5.925000000000000000e+01
6.500000000000000000e+01 5.455846153846152902e+02 2.567887573242187500e+02 -1.033782958984375000e+00 0.000000000000000000e+00 0.000000000000000000e+00 2.173908203125000000e+03 9.028515219688415527e-01 5.000000000000000000e+00 4.000000000000000000e+00 8.358290100097656250e+01 6.475000000000000000e+01 5.925000000000000000e+01
1.200000000000000000e+01 5.369230769230770193e+02 2.618778991699218750e+02 -1.012542724609375000e+00 0.000000000000000000e+00 0.000000000000000000e+00 2.182029296875000000e+03 8.376339673995971680e-01 1.500000000000000000e+01 1.000000000000000000e+00 9.004496002197265625e+01 6.575000000000000000e+01 5.925000000000000000e+01
1.400000000000000000e+01 5.379153846153848235e+02 2.643868103027343750e+02 -1.096313476562500000e+00 0.000000000000000000e+00 5.882352963089942932e-02 2.175406738281250000e+03 1.446545124053955078e+00 1.500000000000000000e+01 1.000000000000000000e+00 5.582069015502929688e+01 6.625000000000000000e+01 5.925000000000000000e+01
2.700000000000000000e+01 5.463769230769232763e+02 2.660043640136718750e+02 -1.180084228515625000e+00 0.000000000000000000e+00 0.000000000000000000e+00 2.168783935546875000e+03 1.225149035453796387e+00 5.000000000000000000e+00 3.000000000000000000e+00 4.632937240600585938e+01 6.675000000000000000e+01 5.925000000000000000e+01
1.800000000000000000e+01 5.437461538461536747e+02 2.716589050292968750e+02 -1.263854980468750000e+00 0.000000000000000000e+00 0.000000000000000000e+00 2.162161132812500000e+03 8.293489813804626465e-01 1.500000000000000000e+01 1.000000000000000000e+00 4.406540298461914062e+01 6.725000000000000000e+01 5.925000000000000000e+01
2.200000000000000000e+01 6.659692307692306485e+02 4.111958312988281250e+02 1.893615722656250000e+00 0.000000000000000000e+00 5.882352963089942932e-02 2.455085449218750000e+03 2.129115819931030273e+00 5.000000000000000000e+00 3.000000000000000000e+00 5.055902481079101562e+01 3.325000000000000000e+01 5.975000000000000000e+01
5.600000000000000000e+01 6.816923076923080771e+02 4.093297424316406250e+02 1.689666748046875000e+00 0.000000000000000000e+00 0.000000000000000000e+00 2.418329101562500000e+03 2.083096027374267578e+00 5.000000000000000000e+00 4.000000000000000000e+00 7.741657257080078125e+01 3.375000000000000000e+01 5.975000000000000000e+01
4.900000000000000000e+01 7.423230769230768828e+02 3.908808288574218750e+02 1.591552734375000000e+00 0.000000000000000000e+00 0.000000000000000000e+00 2.399346435546875000e+03 2.054470062255859375e+00 5.000000000000000000e+00 4.000000000000000000e+00 1.572490386962890625e+02 3.425000000000000000e+01 5.975000000000000000e+01
6.000000000000000000e+01 7.552461538461543569e+02 3.541759033203125000e+02 1.493438720703125000e+00 0.000000000000000000e+00 0.000000000000000000e+00 2.380363525390625000e+03 2.706966161727905273e+00 5.000000000000000000e+00 4.000000000000000000e+00 2.063688507080078125e+02 3.475000000000000000e+01 5.975000000000000000e+01
2.400000000000000000e+01 7.421923076923079634e+02 3.123930053710937500e+02 1.395324707031250000e+00 0.000000000000000000e+00 5.882352963089942932e-02 2.361380859375000000e+03 2.837276458740234375e+00 5.000000000000000000e+00 3.000000000000000000e+00 1.854643859863281250e+02 3.525000000000000000e+01 5.975000000000000000e+01
4.600000000000000000e+01 7.324769230769228443e+02 2.843409118652343750e+02 1.300872802734375000e+00 0.000000000000000000e+00 0.000000000000000000e+00 2.344723632812500000e+03 2.795631885528564453e+00 5.000000000000000000e+00 4.000000000000000000e+00 1.972729797363281250e+02 3.575000000000000000e+01 5.975000000000000000e+01
5.300000000000000000e+01 7.141923076923068265e+02 2.813888854980468750e+02 1.217376708984375000e+00 0.000000000000000000e+00 0.000000000000000000e+00 2.335043701171875000e+03 2.113320589065551758e+00 5.000000000000000000e+00 4.000000000000000000e+00 1.469212493896484375e+02 3.625000000000000000e+01 5.975000000000000000e+01
6.600000000000000000e+01 7.002384615384617064e+02 3.101948852539062500e+02 1.050323486328125000e+00 0.000000000000000000e+00 0.000000000000000000e+00 2.315683593750000000e+03 3.210835456848144531e+00 6.000000000000000000e+00 4.000000000000000000e+00 2.258046264648437500e+02 3.725000000000000000e+01 5.975000000000000000e+01
5.100000000000000000e+01 6.674769230769232990e+02 3.212620849609375000e+02 9.822082519531250000e-01 0.000000000000000000e+00 0.000000000000000000e+00 2.308833251953125000e+03 3.211398363113403320e+00 6.000000000000000000e+00 4.000000000000000000e+00 1.491415405273437500e+02 3.775000000000000000e+01 5.975000000000000000e+01
6.200000000000000000e+01 6.310461538461539703e+02 3.252717590332031250e+02 9.294433593750000000e-01 0.000000000000000000e+00 0.000000000000000000e+00 2.304812500000000000e+03 3.217738389968872070e+00 6.000000000000000000e+00 4.000000000000000000e+00 1.414858093261718750e+02 3.825000000000000000e+01 5.975000000000000000e+01
3.000000000000000000e+01 6.079538461538463707e+02 3.254075012207031250e+02 8.766784667968750000e-01 0.000000000000000000e+00 5.882352963089942932e-02 2.300791748046875000e+03 3.217080593109130859e+00 6.000000000000000000e+00 3.000000000000000000e+00 1.247511596679687500e+02 3.875000000000000000e+01 5.975000000000000000e+01
1.100000000000000000e+01 5.742384615384615927e+02 3.228860168457031250e+02 7.796630859375000000e-01 0.000000000000000000e+00 0.000000000000000000e+00 2.294462158203125000e+03 3.208873510360717773e+00 5.000000000000000000e+00 1.000000000000000000e+00 1.282162628173828125e+02 3.975000000000000000e+01 5.975000000000000000e+01
6.500000000000000000e+01 5.808307692307690786e+02 3.243572692871093750e+02 7.382812500000000000e-01 0.000000000000000000e+00 0.000000000000000000e+00 2.292724365234375000e+03 3.198014259338378906e+00 5.000000000000000000e+00 4.000000000000000000e+00 1.671595916748046875e+02 4.025000000000000000e+01 5.975000000000000000e+01
6.600000000000000000e+01 5.936769230769233445e+02 3.269596557617187500e+02 6.968688964843750000e-01 0.000000000000000000e+00 0.000000000000000000e+00 2.290986328125000000e+03 3.191374063491821289e+00 5.000000000000000000e+00 4.000000000000000000e+00 1.874630584716796875e+02 4.075000000000000000e+01 5.975000000000000000e+01
6.900000000000000000e+01 5.919615384615384528e+02 3.291739501953125000e+02 6.554870605468750000e-01 0.000000000000000000e+00 0.000000000000000000e+00 2.289248535156250000e+03 3.191165924072265625e+00 5.000000000000000000e+00 4.000000000000000000e+00 1.940180358886718750e+02 4.125000000000000000e+01 5.975000000000000000e+01
6.000000000000000000e+01 5.924230769230769056e+02 3.307428588867187500e+02 5.942993164062500000e-01 0.000000000000000000e+00 0.000000000000000000e+00 2.283061523437500000e+03 3.159600257873535156e+00 5.000000000000000000e+00 4.000000000000000000e+00 1.976416168212890625e+02 4.175000000000000000e+01 5.975000000000000000e+01
6.600000000000000000e+01 5.949307692307695561e+02 3.337185974121093750e+02 5.331115722656250000e-01 0.000000000000000000e+00 0.000000000000000000e+00 2.276874755859375000e+03 3.199962139129638672e+00 5.000000000000000000e+00 4.000000000000000000e+00 1.450078125000000000e+02 4.225000000000000000e+01 5.975000000000000000e+01
5.600000000000000000e+01 5.973769230769231626e+02 3.361359863281250000e+02 4.719238281250000000e-01 0.000000000000000000e+00 0.000000000000000000e+00 2.270687988281250000e+03 1.799903035163879395e+00 5.000000000000000000e+00 4.000000000000000000e+00 1.378377532958984375e+02 4.275000000000000000e+01 5.975000000000000000e+01
4.700000000000000000e+01 5.996076923076922185e+02 3.404320678710937500e+02 4.071960449218750000e-01 0.000000000000000000e+00 0.000000000000000000e+00 2.264003173828125000e+03 2.297886371612548828e+00 5.000000000000000000e+00 4.000000000000000000e+00 1.740336456298828125e+02 4.325000000000000000e+01 5.975000000000000000e+01
6.700000000000000000e+01 6.046153846153847553e+02 3.443883056640625000e+02 3.318481445312500000e-01 0.000000000000000000e+00 0.000000000000000000e+00 2.255824951171875000e+03 1.604277014732360840e+00 5.000000000000000000e+00 4.000000000000000000e+00 1.733116455078125000e+02 4.375000000000000000e+01 5.975000000000000000e+01
3.000000000000000000e+01 6.115153846153845052e+02 3.492558593750000000e+02 2.564697265625000000e-01 0.000000000000000000e+00 0.000000000000000000e+00 2.247646728515625000e+03 1.379498481750488281e+00 5.000000000000000000e+00 3.000000000000000000e+00 2.043952789306640625e+02 4.425000000000000000e+01 5.975000000000000000e+01
1.700000000000000000e+01 6.228307692307689649e+02 3.529748840332031250e+02 1.810913085937500000e-01 0.000000000000000000e+00 0.000000000000000000e+00 2.239468505859375000e+03 1.907589435577392578e+00 5.000000000000000000e+00 1.000000000000000000e+00 2.249672241210937500e+02 4.475000000000000000e+01 5.975000000000000000e+01
9.000000000000000000e+00 6.182384615384613653e+02 3.563951110839843750e+02 1.214599609375000000e-01 0.000000000000000000e+00 2.352941185235977173e-01 2.232255615234375000e+03 1.207966685295104980e+00 5.000000000000000000e+00 1.000000000000000000e+00 1.638613128662109375e+02 4.525000000000000000e+01 5.975000000000000000e+01
4.900000000000000000e+01 6.387384615384612516e+02 3.575317077636718750e+02 7.757568359375000000e-02 0.000000000000000000e+00 0.000000000000000000e+00 2.226008300781250000e+03 8.377437591552734375e-01 5.000000000000000000e+00 4.000000000000000000e+00 1.710991668701171875e+02 4.575000000000000000e+01 5.975000000000000000e+01
6.500000000000000000e+01 6.192692307692307168e+02 3.579077453613281250e+02 3.366088867187500000e-02 0.000000000000000000e+00 0.000000000000000000e+00 2.219760986328125000e+03 8.376969695091247559e-01 5.000000000000000000e+00 4.000000000000000000e+00 1.955021209716796875e+02 4.625000000000000000e+01 5.975000000000000000e+01
4.200000000000000000e+01 6.173307692307693060e+02 3.611063842773437500e+02 -1.022338867187500000e-02 0.000000000000000000e+00 0.000000000000000000e+00 2.213513671875000000e+03 1.580150961875915527e+00 5.000000000000000000e+00 3.000000000000000000e+00 1.867767944335937500e+02 4.675000000000000000e+01 5.975000000000000000e+01
7.000000000000000000e+01 6.170769230769230944e+02 3.650166625976562500e+02 -2.590942382812500000e-02 0.000000000000000000e+00 0.000000000000000000e+00 2.211062988281250000e+03 2.063648462295532227e+00 5.000000000000000000e+00 4.000000000000000000e+00 1.922242279052734375e+02 4.725000000000000000e+01 5.975000000000000000e+01
6.500000000000000000e+01 6.231923076923076223e+02 3.694328308105468750e+02 -3.219604492187500000e-02 0.000000000000000000e+00 0.000000000000000000e+00 2.209877929687500000e+03 2.072324514389038086e+00 5.000000000000000000e+00 4.000000000000000000e+00 1.792592620849609375e+02 4.775000000000000000e+01 5.975000000000000000e+01
6.500000000000000000e+01 6.258461538461540385e+02 3.711706542968750000e+02 -3.851318359375000000e-02 0.000000000000000000e+00 0.000000000000000000e+00 2.208692871093750000e+03 2.075949907302856445e+00 5.000000000000000000e+00 4.000000000000000000e+00 1.948575439453125000e+02 4.825000000000000000e+01 5.975000000000000000e+01
6.800000000000000000e+01 6.312538461538463253e+02 3.714930114746093750e+02 -4.479980468750000000e-02 0.000000000000000000e+00 0.000000000000000000e+00 2.207507812500000000e+03 2.073783874511718750e+00 5.000000000000000000e+00 4.000000000000000000e+00 1.794627685546875000e+02 4.875000000000000000e+01 5.975000000000000000e+01
7.300000000000000000e+01 6.378538461538458932e+02 3.687160034179687500e+02 -4.327392578125000000e-02 0.000000000000000000e+00 0.000000000000000000e+00 2.206447998046875000e+03 1.555346250534057617e+00 5.000000000000000000e+00 4.000000000000000000e+00 1.858518829345703125e+02 4.925000000000000000e+01 5.975000000000000000e+01
6.300000000000000000e+01 6.388923076923076678e+02 3.670195922851562500e+02 -4.177856445312500000e-02 0.000000000000000000e+00 0.000000000000000000e+00 2.205388183593750000e+03 8.424676060676574707e-01 5.000000000000000000e+00 4.000000000000000000e+00 1.898158569335937500e+02 4.975000000000000000e+01 5.975000000000000000e+01
6.800000000000000000e+01 6.347692307692306031e+02 3.661878356933593750e+02 -4.028320312500000000e-02 0.000000000000000000e+00 0.000000000000000000e+00 2.204328369140625000e+03 8.399496674537658691e-01 5.000000000000000000e+00 4.000000000000000000e+00 2.138897399902343750e+02 5.025000000000000000e+01 5.975000000000000000e+01
6.500000000000000000e+01 6.367230769230767464e+02 3.685348510742187500e+02 -5.181884765625000000e-02 0.000000000000000000e+00 0.000000000000000000e+00 2.201058593750000000e+03 8.398447036743164062e-01 5.000000000000000000e+00 4.000000000000000000e+00 1.621697235107421875e+02 5.075000000000000000e+01 5.975000000000000000e+01
7.600000000000000000e+01 6.403076923076920366e+02 3.704535827636718750e+02 -1.024780273437500000e-01 0.000000000000000000e+00 0.000000000000000000e+00 2.191159179687500000e+03 1.379083871841430664e+00 5.000000000000000000e+00 4.000000000000000000e+00 1.756256561279296875e+02 5.125000000000000000e+01 5.975000000000000000e+01
4.600000000000000000e+01 6.326230769230770647e+02 3.703408813476562500e+02 -2.037658691406250000e-01 0.000000000000000000e+00 0.000000000000000000e+00 2.171360107421875000e+03 1.684185624122619629e+00 5.000000000000000000e+00 4.000000000000000000e+00 1.720238037109375000e+02 5.225000000000000000e+01 5.975000000000000000e+01
2.300000000000000000e+01 6.315692307692304439e+02 3.666850891113281250e+02 -2.939758300781250000e-01 0.000000000000000000e+00 2.352941185235977173e-01 2.157106689453125000e+03 2.046715974807739258e+00 5.000000000000000000e+00 3.000000000000000000e+00 1.608884277343750000e+02 5.275000000000000000e+01 5.975000000000000000e+01
5.400000000000000000e+01 6.436769230769234582e+02 3.610465393066406250e+02 -4.237670898437500000e-01 0.000000000000000000e+00 0.000000000000000000e+00 2.138499755859375000e+03 2.035193204879760742e+00 5.000000000000000000e+00 4.000000000000000000e+00 1.967190399169921875e+02 5.325000000000000000e+01 5.975000000000000000e+01
6.200000000000000000e+01 6.594307692307689877e+02 3.537865600585937500e+02 -5.535278320312500000e-01 0.000000000000000000e+00 0.000000000000000000e+00 2.119892578125000000e+03 2.026608467102050781e+00 5.000000000000000000e+00 4.000000000000000000e+00 2.348990173339843750e+02 5.375000000000000000e+01 5.975000000000000000e+01
4.000000000000000000e+01 6.648384615384612744e+02 3.508114624023437500e+02 -6.833190917968750000e-01 0.000000000000000000e+00 0.000000000000000000e+00 2.101285644531250000e+03 2.029144048690795898e+00 5.000000000000000000e+00 3.000000000000000000e+00 2.060979766845703125e+02 5.425000000000000000e+01 5.975000000000000000e+01
5.900000000000000000e+01 6.778538461538456659e+02 3.535343933105468750e+02 -8.710937500000000000e-01 0.000000000000000000e+00 0.000000000000000000e+00 2.080380859375000000e+03 2.031786680221557617e+00 5.000000000000000000e+00 4.000000000000000000e+00 1.653184509277343750e+02 5.475000000000000000e+01 5.975000000000000000e+01
5.600000000000000000e+01 6.925153846153845052e+02 3.631172180175781250e+02 -1.078216552734375000e+00 0.000000000000000000e+00 0.000000000000000000e+00 2.058710205078125000e+03 1.559407711029052734e+00 5.000000000000000000e+00 4.000000000000000000e+00 1.897109222412109375e+02 5.525000000000000000e+01 5.975000000000000000e+01
6.500000000000000000e+01 7.034999999999998863e+02 3.756567687988281250e+02 -1.285369873046875000e+00 0.000000000000000000e+00 0.000000000000000000e+00 2.037039672851562500e+03 1.737623214721679688e+00 5.000000000000000000e+00 4.000000000000000000e+00 1.666663818359375000e+02 5.575000000000000000e+01 5.975000000000000000e+01
5.700000000000000000e+01 7.098384615384616154e+02 3.930040893554687500e+02 -1.492492675781250000e+00 0.000000000000000000e+00 0.000000000000000000e+00 2.015369018554687500e+03 2.019789218902587891e+00 5.000000000000000000e+00 4.000000000000000000e+00 1.590277709960937500e+02 5.625000000000000000e+01 5.975000000000000000e+01
7.600000000000000000e+01 7.162000000000002728e+02 4.088089599609375000e+02 -1.633148193359375000e+00 0.000000000000000000e+00 0.000000000000000000e+00 2.000619140625000000e+03 2.010251045227050781e+00 5.000000000000000000e+00 4.000000000000000000e+00 1.696474914550781250e+02 5.675000000000000000e+01 5.975000000000000000e+01
6.900000000000000000e+01 7.022076923076926960e+02 4.127105102539062500e+02 -1.914520263671875000e+00 9.999999776482582092e-03 0.000000000000000000e+00 1.971119262695312500e+03 1.935783863067626953e+00 5.000000000000000000e+00 4.000000000000000000e+00 2.774479064941406250e+02 5.775000000000000000e+01 5.975000000000000000e+01
6.600000000000000000e+01 6.984307692307688740e+02 3.780584106445312500e+02 -2.028442382812500000e+00 9.999999776482582092e-03 0.000000000000000000e+00 1.960630371093750000e+03 1.868054628372192383e+00 1.300000000000000000e+01 4.000000000000000000e+00 4.418515014648437500e+02 5.825000000000000000e+01 5.975000000000000000e+01
6.400000000000000000e+01 6.841846153846153129e+02 3.284469604492187500e+02 -2.062072753906250000e+00 9.999999776482582092e-03 0.000000000000000000e+00 1.962924682617187500e+03 1.815993070602416992e+00 1.300000000000000000e+01 4.000000000000000000e+00 4.427692871093750000e+02 5.875000000000000000e+01 5.975000000000000000e+01
7.300000000000000000e+01 6.480999999999997954e+02 2.883202514648437500e+02 -2.095733642578125000e+00 1.419255882501602173e-01 0.000000000000000000e+00 1.965218994140625000e+03 1.627885341644287109e+00 1.300000000000000000e+01 4.000000000000000000e+00 4.999896240234375000e+02 5.925000000000000000e+01 5.975000000000000000e+01
3.900000000000000000e+01 5.803615384615387711e+02 2.715044555664062500e+02 -2.129394531250000000e+00 9.999999776482582092e-03 0.000000000000000000e+00 1.967513305664062500e+03 9.856192469596862793e-01 1.300000000000000000e+01 3.000000000000000000e+00 2.457702178955078125e+02 5.975000000000000000e+01 5.975000000000000000e+01
6.700000000000000000e+01 5.613692307692307395e+02 2.646937255859375000e+02 -2.012237548828125000e+00 0.000000000000000000e+00 0.000000000000000000e+00 1.996329956054687500e+03 1.823996782302856445e+00 1.300000000000000000e+01 4.000000000000000000e+00 1.180686950683593750e+02 6.075000000000000000e+01 5.975000000000000000e+01
6.900000000000000000e+01 5.531538461538461888e+02 2.633573913574218750e+02 -1.922912597656250000e+00 0.000000000000000000e+00 2.352941185235977173e-01 2.014776245117187500e+03 8.855423927307128906e-01 5.000000000000000000e+00 4.000000000000000000e+00 9.123500061035156250e+01 6.125000000000000000e+01 5.975000000000000000e+01
2.500000000000000000e+01 5.490153846153846189e+02 2.594621887207031250e+02 -1.833587646484375000e+00 0.000000000000000000e+00 2.352941185235977173e-01 2.033222656250000000e+03 1.638104438781738281e+00 1.500000000000000000e+01 3.000000000000000000e+00 8.870359802246093750e+01 6.175000000000000000e+01 5.975000000000000000e+01
6.700000000000000000e+01 5.512999999999999545e+02 2.539486694335937500e+02 -1.720947265625000000e+00 0.000000000000000000e+00 0.000000000000000000e+00 2.050125488281250000e+03 8.212206959724426270e-01 5.000000000000000000e+00 4.000000000000000000e+00 7.664369201660156250e+01 6.225000000000000000e+01 5.975000000000000000e+01
1.800000000000000000e+01 5.488384615384613880e+02 2.455068359375000000e+02 -1.600524902343750000e+00 0.000000000000000000e+00 6.470588445663452148e-01 2.066513671875000000e+03 8.207306861877441406e-01 5.000000000000000000e+00 1.000000000000000000e+00 7.111093902587890625e+01 6.275000000000000000e+01 5.975000000000000000e+01
3.100000000000000000e+01 5.464999999999995453e+02 2.370908966064453125e+02 -1.480102539062500000e+00 0.000000000000000000e+00 0.000000000000000000e+00 2.082902099609375000e+03 1.023309111595153809e+00 1.500000000000000000e+01 3.000000000000000000e+00 7.104553985595703125e+01 6.325000000000000000e+01 5.975000000000000000e+01
4.300000000000000000e+01 5.487615384615388621e+02 2.299245147705078125e+02 -1.359649658203125000e+00 0.000000000000000000e+00 0.000000000000000000e+00 2.099290283203125000e+03 8.763443827629089355e-01 5.000000000000000000e+00 3.000000000000000000e+00 8.936285400390625000e+01 6.375000000000000000e+01 5.975000000000000000e+01
4.800000000000000000e+01 5.474923076923074632e+02 2.281483917236328125e+02 -1.327392578125000000e+00 0.000000000000000000e+00 0.000000000000000000e+00 2.104450439453125000e+03 8.262404799461364746e-01 5.000000000000000000e+00 4.000000000000000000e+00 6.562109375000000000e+01 6.425000000000000000e+01 5.975000000000000000e+01
2.300000000000000000e+01 5.473999999999998636e+02 2.326368560791015625e+02 -1.295135498046875000e+00 0.000000000000000000e+00 0.000000000000000000e+00 2.109610351562500000e+03 8.269881010055541992e-01 5.000000000000000000e+00 3.000000000000000000e+00 7.182149505615234375e+01 6.475000000000000000e+01 5.975000000000000000e+01
5.800000000000000000e+01 5.465923076923077133e+02 2.396253509521484375e+02 -1.262847900390625000e+00 0.000000000000000000e+00 7.058823704719543457e-01 2.114770263671875000e+03 8.262729048728942871e-01 5.000000000000000000e+00 4.000000000000000000e+00 5.054989624023437500e+01 6.525000000000000000e+01 5.975000000000000000e+01
5.900000000000000000e+01 5.425538461538461661e+02 2.444021148681640625e+02 -1.258331298828125000e+00 0.000000000000000000e+00 6.470588445663452148e-01 2.117083251953125000e+03 8.251131772994995117e-01 5.000000000000000000e+00 4.000000000000000000e+00 5.687570190429687500e+01 6.575000000000000000e+01 5.975000000000000000e+01
1.200000000000000000e+01 5.491769230769235719e+02 2.559634246826171875e+02 -1.415679931640625000e+00 0.000000000000000000e+00 5.294117927551269531e-01 2.104626464843750000e+03 8.193725943565368652e-01 1.500000000000000000e+01 1.000000000000000000e+00 4.816773986816406250e+01 6.675000000000000000e+01 5.975000000000000000e+01
1.500000000000000000e+01 5.434846153846153811e+02 2.806734008789062500e+02 -1.623352050781250000e+00 9.999999776482582092e-03 3.529411852359771729e-01 2.085032714843750000e+03 1.054149031639099121e+00 1.500000000000000000e+01 1.000000000000000000e+00 4.008348464965820312e+01 6.775000000000000000e+01 5.975000000000000000e+01
4.800000000000000000e+01 6.599000000000000909e+02 4.063897094726562500e+02 1.577850341796875000e+00 0.000000000000000000e+00 5.882352963089942932e-02 2.395874267578125000e+03 3.232304573059082031e+00 5.000000000000000000e+00 4.000000000000000000e+00 1.435621833801269531e+01 3.325000000000000000e+01 6.025000000000000000e+01
7.300000000000000000e+01 6.829461538461538339e+02 4.015006103515625000e+02 1.410766601562500000e+00 0.000000000000000000e+00 0.000000000000000000e+00 2.365340332031250000e+03 2.919505119323730469e+00 5.000000000000000000e+00 4.000000000000000000e+00 9.888999176025390625e+01 3.375000000000000000e+01 6.025000000000000000e+01
5.500000000000000000e+01 7.216769230769235719e+02 3.845571594238281250e+02 1.357116699218750000e+00 0.000000000000000000e+00 0.000000000000000000e+00 2.349723388671875000e+03 2.036534070968627930e+00 5.000000000000000000e+00 4.000000000000000000e+00 1.126856460571289062e+02 3.425000000000000000e+01 6.025000000000000000e+01
6.200000000000000000e+01 7.619307692307695561e+02 2.922301940917968750e+02 1.188568115234375000e+00 0.000000000000000000e+00 0.000000000000000000e+00 2.304483398437500000e+03 2.012205123901367188e+00 5.000000000000000000e+00 4.000000000000000000e+00 2.461816101074218750e+02 3.575000000000000000e+01 6.025000000000000000e+01
2.200000000000000000e+01 7.573769230769228216e+02 2.830511779785156250e+02 1.104736328125000000e+00 0.000000000000000000e+00 0.000000000000000000e+00 2.295309326171875000e+03 2.206308364868164062e+00 1.500000000000000000e+01 3.000000000000000000e+00 1.683824768066406250e+02 3.625000000000000000e+01 6.025000000000000000e+01
5.600000000000000000e+01 6.058307692307689649e+02 3.239514770507812500e+02 7.613830566406250000e-01 0.000000000000000000e+00 0.000000000000000000e+00 2.260862304687500000e+03 3.212961912155151367e+00 1.500000000000000000e+01 4.000000000000000000e+00 1.391262054443359375e+02 3.875000000000000000e+01 6.025000000000000000e+01
6.400000000000000000e+01 5.945461538461537430e+02 3.402627868652343750e+02 7.078857421875000000e-01 0.000000000000000000e+00 0.000000000000000000e+00 2.256257568359375000e+03 3.203011512756347656e+00 1.500000000000000000e+01 4.000000000000000000e+00 1.433315429687500000e+02 3.925000000000000000e+01 6.025000000000000000e+01
6.200000000000000000e+01 6.306153846153845279e+02 3.613067016601562500e+02 5.972595214843750000e-01 0.000000000000000000e+00 0.000000000000000000e+00 2.248751708984375000e+03 3.147028923034667969e+00 5.000000000000000000e+00 4.000000000000000000e+00 1.512154235839843750e+02 4.025000000000000000e+01 6.025000000000000000e+01
6.300000000000000000e+01 6.224230769230770193e+02 3.598317565917968750e+02 5.416870117187500000e-01 0.000000000000000000e+00 0.000000000000000000e+00 2.245120605468750000e+03 2.970423460006713867e+00 5.000000000000000000e+00 4.000000000000000000e+00 1.781156463623046875e+02 4.075000000000000000e+01 6.025000000000000000e+01
6.300000000000000000e+01 6.245692307692307850e+02 3.534327087402343750e+02 4.861145019531250000e-01 0.000000000000000000e+00 2.352941185235977173e-01 2.241489501953125000e+03 2.179675579071044922e+00 5.000000000000000000e+00 4.000000000000000000e+00 1.752763214111328125e+02 4.125000000000000000e+01 6.025000000000000000e+01
5.800000000000000000e+01 6.061307692307691468e+02 3.441029663085937500e+02 4.090881347656250000e-01 0.000000000000000000e+00 0.000000000000000000e+00 2.233416992187500000e+03 2.375622987747192383e+00 5.000000000000000000e+00 4.000000000000000000e+00 1.747862701416015625e+02 4.175000000000000000e+01 6.025000000000000000e+01
9.000000000000000000e+00 6.219923076923076906e+02 3.407424621582031250e+02 3.320617675781250000e-01 0.000000000000000000e+00 0.000000000000000000e+00 2.225344482421875000e+03 2.022248983383178711e+00 5.000000000000000000e+00 1.000000000000000000e+00 1.684734497070312500e+02 4.225000000000000000e+01 6.025000000000000000e+01
5.600000000000000000e+01 5.955538461538463935e+02 3.403450012207031250e+02 2.550354003906250000e-01 0.000000000000000000e+00 0.000000000000000000e+00 2.217271972656250000e+03 2.563904523849487305e+00 5.000000000000000000e+00 4.000000000000000000e+00 1.685411376953125000e+02 4.275000000000000000e+01 6.025000000000000000e+01
6.300000000000000000e+01 6.088461538461534701e+02 3.413215026855468750e+02 1.761779785156250000e-01 0.000000000000000000e+00 0.000000000000000000e+00 2.208974365234375000e+03 2.482853889465332031e+00 5.000000000000000000e+00 4.000000000000000000e+00 1.731593933105468750e+02 4.325000000000000000e+01 6.025000000000000000e+01
6.000000000000000000e+01 6.148923076923075541e+02 3.455883789062500000e+02 7.537841796875000000e-03 0.000000000000000000e+00 0.000000000000000000e+00 2.191029785156250000e+03 2.030740976333618164e+00 5.000000000000000000e+00 4.000000000000000000e+00 1.611202697753906250e+02 4.425000000000000000e+01 6.025000000000000000e+01
6.900000000000000000e+01 6.182846153846151083e+02 3.489717712402343750e+02 -7.678222656250000000e-02 0.000000000000000000e+00 0.000000000000000000e+00 2.182057373046875000e+03 2.030624866485595703e+00 5.000000000000000000e+00 4.000000000000000000e+00 1.691478118896484375e+02 4.475000000000000000e+01 6.025000000000000000e+01
6.500000000000000000e+01 6.235615384615382482e+02 3.516403808593750000e+02 -1.438903808593750000e-01 0.000000000000000000e+00 0.000000000000000000e+00 2.174084960937500000e+03 1.219892740249633789e+00 5.000000000000000000e+00 4.000000000000000000e+00 1.866523742675781250e+02 4.525000000000000000e+01 6.025000000000000000e+01
7.500000000000000000e+01 6.313307692307691923e+02 3.533511657714843750e+02 -1.938171386718750000e-01 0.000000000000000000e+00 0.000000000000000000e+00 2.167112304687500000e+03 8.284975886344909668e-01 5.000000000000000000e+00 4.000000000000000000e+00 1.915241851806640625e+02 4.575000000000000000e+01 6.025000000000000000e+01
6.200000000000000000e+01 6.276692307692305803e+02 3.556088256835937500e+02 -2.437133789062500000e-01 0.000000000000000000e+00 0.000000000000000000e+00 2.160139892578125000e+03 8.294914960861206055e-01 5.000000000000000000e+00 4.000000000000000000e+00 1.742188873291015625e+02 4.625000000000000000e+01 6.025000000000000000e+01
4.300000000000000000e+01 6.206230769230768374e+02 3.582886657714843750e+02 -2.936096191406250000e-01 0.000000000000000000e+00 0.000000000000000000e+00 2.153167480468750000e+03 8.302776813507080078e-01 5.000000000000000000e+00 3.000000000000000000e+00 1.550956878662109375e+02 4.675000000000000000e+01 6.025000000000000000e+01
6.000000000000000000e+01 6.250538461538460524e+02 3.622997131347656250e+02 -3.137207031250000000e-01 0.000000000000000000e+00 0.000000000000000000e+00 2.150198974609375000e+03 8.302158117294311523e-01 5.000000000000000000e+00 4.000000000000000000e+00 1.768020782470703125e+02 4.725000000000000000e+01 6.025000000000000000e+01
7.000000000000000000e+01 6.217307692307693969e+02 3.669923706054687500e+02 -3.238830566406250000e-01 0.000000000000000000e+00 0.000000000000000000e+00 2.148564941406250000e+03 1.676658391952514648e+00 5.000000000000000000e+00 4.000000000000000000e+00 1.488988647460937500e+02 4.775000000000000000e+01 6.025000000000000000e+01
6.400000000000000000e+01 6.115846153846154039e+02 3.688109436035156250e+02 -3.340454101562500000e-01 0.000000000000000000e+00 0.000000000000000000e+00 2.146931152343750000e+03 2.043976545333862305e+00 5.000000000000000000e+00 4.000000000000000000e+00 1.443857727050781250e+02 4.825000000000000000e+01 6.025000000000000000e+01
7.300000000000000000e+01 6.298923076923073268e+02 3.665610656738281250e+02 -3.442077636718750000e-01 0.000000000000000000e+00 0.000000000000000000e+00 2.145297119140625000e+03 2.046769857406616211e+00 5.000000000000000000e+00 4.000000000000000000e+00 1.464975738525390625e+02 4.875000000000000000e+01 6.025000000000000000e+01
3.400000000000000000e+01 6.283230769230772239e+02 3.607633361816406250e+02 -3.495483398437500000e-01 0.000000000000000000e+00 0.000000000000000000e+00 2.143204589843750000e+03 1.902582526206970215e+00 2.000000000000000000e+00 3.000000000000000000e+00 1.552203979492187500e+02 4.925000000000000000e+01 6.025000000000000000e+01
6.300000000000000000e+01 6.311307692307691468e+02 3.581874694824218750e+02 -3.548889160156250000e-01 0.000000000000000000e+00 0.000000000000000000e+00 2.141112304687500000e+03 1.822334170341491699e+00 2.000000000000000000e+00 4.000000000000000000e+00 1.524405670166015625e+02 4.975000000000000000e+01 6.025000000000000000e+01
6.900000000000000000e+01 6.277846153846153356e+02 3.573804626464843750e+02 -3.602294921875000000e-01 0.000000000000000000e+00 0.000000000000000000e+00 2.139019775390625000e+03 1.659494996070861816e+00 5.000000000000000000e+00 4.000000000000000000e+00 2.151551208496093750e+02 5.025000000000000000e+01 6.025000000000000000e+01
3.400000000000000000e+01 6.309384615384612971e+02 3.584833374023437500e+02 -3.770141601562500000e-01 0.000000000000000000e+00 0.000000000000000000e+00 2.134930908203125000e+03 8.410459160804748535e-01 5.000000000000000000e+00 3.000000000000000000e+00 1.837572326660156250e+02 5.075000000000000000e+01 6.025000000000000000e+01
3.400000000000000000e+01 6.380076923076921958e+02 3.609038391113281250e+02 -4.281311035156250000e-01 0.000000000000000000e+00 2.941176593303680420e-01 2.124853027343750000e+03 8.384273052215576172e-01 2.000000000000000000e+00 3.000000000000000000e+00 1.431127624511718750e+02 5.125000000000000000e+01 6.025000000000000000e+01
6.400000000000000000e+01 6.335461538461538566e+02 3.637942810058593750e+02 -4.792480468750000000e-01 0.000000000000000000e+00 0.000000000000000000e+00 2.114775146484375000e+03 9.603876471519470215e-01 2.000000000000000000e+00 4.000000000000000000e+00 1.507888641357421875e+02 5.175000000000000000e+01 6.025000000000000000e+01
5.800000000000000000e+01 6.280076923076921958e+02 3.656258850097656250e+02 -5.303649902343750000e-01 0.000000000000000000e+00 0.000000000000000000e+00 2.104697265625000000e+03 1.855896472930908203e+00 2.000000000000000000e+00 4.000000000000000000e+00 2.012696533203125000e+02 5.225000000000000000e+01 6.025000000000000000e+01
1.900000000000000000e+01 6.311846153846153129e+02 3.647140808105468750e+02 -6.216125488281250000e-01 0.000000000000000000e+00 2.941176593303680420e-01 2.090689941406250000e+03 2.040481567382812500e+00 5.000000000000000000e+00 1.000000000000000000e+00 1.922864685058593750e+02 5.275000000000000000e+01 6.025000000000000000e+01
6.500000000000000000e+01 6.425384615384610925e+02 3.637843627929687500e+02 -8.843383789062500000e-01 0.000000000000000000e+00 5.294117927551269531e-01 2.054816406250000000e+03 2.021260976791381836e+00 2.000000000000000000e+00 4.000000000000000000e+00 1.839900817871093750e+02 5.375000000000000000e+01 6.025000000000000000e+01
6.400000000000000000e+01 6.575923076923077133e+02 3.650307312011718750e+02 -1.015686035156250000e+00 0.000000000000000000e+00 0.000000000000000000e+00 2.036879516601562500e+03 2.017357826232910156e+00 5.000000000000000000e+00 4.000000000000000000e+00 1.669472351074218750e+02 5.425000000000000000e+01 6.025000000000000000e+01
7.000000000000000000e+00 6.856923076923077360e+02 3.859484252929687500e+02 -1.403472900390625000e+00 0.000000000000000000e+00 0.000000000000000000e+00 1.996348022460937500e+03 2.013253688812255859e+00 5.000000000000000000e+00 1.000000000000000000e+00 1.321126403808593750e+02 5.525000000000000000e+01 6.025000000000000000e+01
6.600000000000000000e+01 7.011615384615381572e+02 4.085099487304687500e+02 -1.606323242187500000e+00 0.000000000000000000e+00 0.000000000000000000e+00 1.975749511718750000e+03 2.004515886306762695e+00 5.000000000000000000e+00 4.000000000000000000e+00 1.424743194580078125e+02 5.575000000000000000e+01 6.025000000000000000e+01
7.000000000000000000e+01 7.190615384615385892e+02 4.260184020996093750e+02 -1.809143066406250000e+00 0.000000000000000000e+00 0.000000000000000000e+00 1.955151123046875000e+03 1.996623754501342773e+00 8.000000000000000000e+00 4.000000000000000000e+00 1.538970947265625000e+02 5.625000000000000000e+01 6.025000000000000000e+01
6.000000000000000000e+01 7.152769230769233673e+02 4.355948486328125000e+02 -1.951629638671875000e+00 0.000000000000000000e+00 0.000000000000000000e+00 1.939643188476562500e+03 1.988613843917846680e+00 5.000000000000000000e+00 4.000000000000000000e+00 1.464217834472656250e+02 5.675000000000000000e+01 6.025000000000000000e+01
5.900000000000000000e+01 7.112076923076923549e+02 4.378998107910156250e+02 -2.094146728515625000e+00 0.000000000000000000e+00 2.941176593303680420e-01 1.924135375976562500e+03 1.954901814460754395e+00 5.000000000000000000e+00 4.000000000000000000e+00 1.785679016113281250e+02 5.725000000000000000e+01 6.025000000000000000e+01
4.600000000000000000e+01 7.059923076923076906e+02 4.289687805175781250e+02 -2.236633300781250000e+00 9.999999776482582092e-03 0.000000000000000000e+00 1.908627563476562500e+03 1.893530607223510742e+00 5.000000000000000000e+00 4.000000000000000000e+00 3.469579467773437500e+02 5.775000000000000000e+01 6.025000000000000000e+01
6.900000000000000000e+01 7.004307692307692150e+02 4.001445007324218750e+02 -2.353637695312500000e+00 2.375109046697616577e-01 0.000000000000000000e+00 1.897100952148437500e+03 1.806848406791687012e+00 1.300000000000000000e+01 4.000000000000000000e+00 5.310274047851562500e+02 5.825000000000000000e+01 6.025000000000000000e+01
3.000000000000000000e+00 6.824153846153840277e+02 3.526660766601562500e+02 -2.394195556640625000e+00 1.706509739160537720e-01 2.941176593303680420e-01 1.897518188476562500e+03 1.618414640426635742e+00 1.300000000000000000e+01 1.000000000000000000e+00 6.524711914062500000e+02 5.875000000000000000e+01 6.025000000000000000e+01
7.100000000000000000e+01 6.587692307692304894e+02 3.074119873046875000e+02 -2.434783935546875000e+00 1.716368496417999268e-01 0.000000000000000000e+00 1.897935302734375000e+03 1.690744519233703613e+00 1.300000000000000000e+01 4.000000000000000000e+00 4.501560974121093750e+02 5.925000000000000000e+01 6.025000000000000000e+01
6.700000000000000000e+01 5.941769230769231172e+02 2.844708557128906250e+02 -2.475341796875000000e+00 1.160275265574455261e-01 8.235294222831726074e-01 1.898352416992187500e+03 1.248292207717895508e+00 1.300000000000000000e+01 4.000000000000000000e+00 3.566728210449218750e+02 5.975000000000000000e+01 6.025000000000000000e+01
6.600000000000000000e+01 5.621615384615384983e+02 2.747994384765625000e+02 -2.449859619140625000e+00 9.999999776482582092e-03 5.882353186607360840e-01 1.908066284179687500e+03 1.913859844207763672e+00 1.300000000000000000e+01 4.000000000000000000e+00 2.119457397460937500e+02 6.025000000000000000e+01 6.025000000000000000e+01
3.800000000000000000e+01 5.514230769230769056e+02 2.702758178710937500e+02 -2.358337402343750000e+00 9.999999776482582092e-03 2.352941185235977173e-01 1.927077026367187500e+03 1.949332356452941895e+00 1.300000000000000000e+01 3.000000000000000000e+00 8.884426116943359375e+01 6.075000000000000000e+01 6.025000000000000000e+01
1.600000000000000000e+01 5.461923076923073950e+02 2.664739074707031250e+02 -2.266815185546875000e+00 0.000000000000000000e+00 2.941176593303680420e-01 1.946087646484375000e+03 1.972928524017333984e+00 5.000000000000000000e+00 1.000000000000000000e+00 6.828809356689453125e+01 6.125000000000000000e+01 6.025000000000000000e+01
5.200000000000000000e+01 5.499692307692305349e+02 2.512453613281250000e+02 -2.059295654296875000e+00 0.000000000000000000e+00 2.352941185235977173e-01 1.982032836914062500e+03 1.844745039939880371e+00 5.000000000000000000e+00 4.000000000000000000e+00 1.063550872802734375e+02 6.225000000000000000e+01 6.025000000000000000e+01
6.000000000000000000e+01 5.516076923076918774e+02 2.393317108154296875e+02 -1.935150146484375000e+00 0.000000000000000000e+00 8.235294222831726074e-01 1.998275390625000000e+03 1.097790956497192383e+00 5.000000000000000000e+00 4.000000000000000000e+00 7.208993530273437500e+01 6.275000000000000000e+01 6.025000000000000000e+01
1.800000000000000000e+01 5.528769230769231626e+02 2.252148284912109375e+02 -1.811004638671875000e+00 9.999999776482582092e-03 0.000000000000000000e+00 2.014517822265625000e+03 1.525527834892272949e+00 1.500000000000000000e+01 1.000000000000000000e+00 8.347520446777343750e+01 6.325000000000000000e+01 6.025000000000000000e+01
4.800000000000000000e+01 5.508307692307691923e+02 2.125655517578125000e+02 -1.686859130859375000e+00 9.999999776482582092e-03 0.000000000000000000e+00 2.030760253906250000e+03 1.980571508407592773e+00 5.000000000000000000e+00 4.000000000000000000e+00 6.624585723876953125e+01 6.375000000000000000e+01 6.025000000000000000e+01
1.700000000000000000e+01 5.511307692307692605e+02 2.064718475341796875e+02 -1.644317626953125000e+00 0.000000000000000000e+00 0.000000000000000000e+00 2.036789550781250000e+03 1.870438337326049805e+00 5.000000000000000000e+00 1.000000000000000000e+00 5.607586288452148438e+01 6.425000000000000000e+01 6.025000000000000000e+01
1.200000000000000000e+01 5.575538461538461661e+02 2.422329864501953125e+02 -1.543914794921875000e+00 9.999999776482582092e-03 5.294117927551269531e-01 2.052074951171875000e+03 1.287953734397888184e+00 1.500000000000000000e+01 1.000000000000000000e+00 4.844418334960937500e+01 6.575000000000000000e+01 6.025000000000000000e+01
6.000000000000000000e+00 5.590692307692306713e+02 2.524383697509765625e+02 -1.610015869140625000e+00 9.999999776482582092e-03 2.352941185235977173e-01 2.046894653320312500e+03 1.815773606300354004e+00 1.500000000000000000e+01 1.000000000000000000e+00 6.086928558349609375e+01 6.625000000000000000e+01 6.025000000000000000e+01
9.000000000000000000e+00 5.615384615384616609e+02 2.653952331542968750e+02 -1.676116943359375000e+00 9.999999776482582092e-03 2.352941185235977173e-01 2.041714233398437500e+03 1.802396655082702637e+00 1.500000000000000000e+01 1.000000000000000000e+00 7.889889526367187500e+01 6.675000000000000000e+01 6.025000000000000000e+01
4.700000000000000000e+01 5.541076923076924459e+02 2.926859130859375000e+02 -1.862121582031250000e+00 9.999999776482582092e-03 1.764705926179885864e-01 2.023882446289062500e+03 9.427039623260498047e-01 1.500000000000000000e+01 4.000000000000000000e+00 6.706855773925781250e+01 6.775000000000000000e+01 6.025000000000000000e+01
5.100000000000000000e+01 6.672461538461544706e+02 3.782858581542968750e+02 1.015991210937500000e+00 0.000000000000000000e+00 0.000000000000000000e+00 2.289227783203125000e+03 3.166737794876098633e+00 5.000000000000000000e+00 4.000000000000000000e+00 3.568787384033203125e+01 3.375000000000000000e+01 6.075000000000000000e+01
5.300000000000000000e+01 6.981076923076925596e+02 3.604540405273437500e+02 1.039886474609375000e+00 0.000000000000000000e+00 1.176470592617988586e-01 2.281913818359375000e+03 3.117837905883789062e+00 5.000000000000000000e+00 4.000000000000000000e+00 1.128422241210937500e+02 3.425000000000000000e+01 6.075000000000000000e+01
8.000000000000000000e+00 7.210615384615383618e+02 3.322959899902343750e+02 1.063751220703125000e+00 0.000000000000000000e+00 0.000000000000000000e+00 2.274599609375000000e+03 2.523430585861206055e+00 5.000000000000000000e+00 1.000000000000000000e+00 1.086859893798828125e+02 3.475000000000000000e+01 6.075000000000000000e+01
6.900000000000000000e+01 7.167615384615380663e+02 3.017884521484375000e+02 1.087646484375000000e+00 0.000000000000000000e+00 0.000000000000000000e+00 2.267285644531250000e+03 2.230212926864624023e+00 5.000000000000000000e+00 4.000000000000000000e+00 2.035628967285156250e+02 3.525000000000000000e+01 6.075000000000000000e+01
6.700000000000000000e+01 6.931153846153848690e+02 2.767195434570312500e+02 1.083587646484375000e+00 0.000000000000000000e+00 0.000000000000000000e+00 2.259520751953125000e+03 2.959959030151367188e+00 5.000000000000000000e+00 4.000000000000000000e+00 9.312759399414062500e+01 3.575000000000000000e+01 6.075000000000000000e+01
6.400000000000000000e+01 7.584384615384612971e+02 2.637153015136718750e+02 9.956054687500000000e-01 0.000000000000000000e+00 0.000000000000000000e+00 2.250403076171875000e+03 2.630938529968261719e+00 5.000000000000000000e+00 4.000000000000000000e+00 2.048808746337890625e+02 3.625000000000000000e+01 6.075000000000000000e+01
6.000000000000000000e+00 6.943230769230769965e+02 2.667796020507812500e+02 9.076538085937500000e-01 0.000000000000000000e+00 5.882352963089942932e-02 2.241285644531250000e+03 2.257333755493164062e+00 5.000000000000000000e+00 1.000000000000000000e+00 1.417067260742187500e+02 3.675000000000000000e+01 6.075000000000000000e+01
5.400000000000000000e+01 6.717076923076922412e+02 2.837961120605468750e+02 8.197021484375000000e-01 0.000000000000000000e+00 0.000000000000000000e+00 2.232167968750000000e+03 2.041381835937500000e+00 5.000000000000000000e+00 4.000000000000000000e+00 1.673003234863281250e+02 3.725000000000000000e+01 6.075000000000000000e+01
6.100000000000000000e+01 6.458230769230769965e+02 3.031351623535156250e+02 7.544555664062500000e-01 0.000000000000000000e+00 0.000000000000000000e+00 2.226243896484375000e+03 2.047953128814697266e+00 5.000000000000000000e+00 4.000000000000000000e+00 1.823050537109375000e+02 3.775000000000000000e+01 6.075000000000000000e+01
6.400000000000000000e+01 6.333923076923080089e+02 3.210404968261718750e+02 7.119140625000000000e-01 0.000000000000000000e+00 0.000000000000000000e+00 2.223512939453125000e+03 2.047200441360473633e+00 5.000000000000000000e+00 4.000000000000000000e+00 1.575844573974609375e+02 3.825000000000000000e+01 6.075000000000000000e+01
5.900000000000000000e+01 6.269307692307694424e+02 3.736174011230468750e+02 5.663146972656250000e-01 0.000000000000000000e+00 0.000000000000000000e+00 2.213098632812500000e+03 2.013850927352905273e+00 2.000000000000000000e+00 4.000000000000000000e+00 1.785704803466796875e+02 3.975000000000000000e+01 6.075000000000000000e+01
5.500000000000000000e+01 6.665615384615385892e+02 3.795745849609375000e+02 4.997558593750000000e-01 0.000000000000000000e+00 0.000000000000000000e+00 2.207405517578125000e+03 1.995816230773925781e+00 5.000000000000000000e+00 4.000000000000000000e+00 1.803211517333984375e+02 4.025000000000000000e+01 6.075000000000000000e+01
6.500000000000000000e+01 6.490538461538461661e+02 3.741808776855468750e+02 4.331970214843750000e-01 0.000000000000000000e+00 0.000000000000000000e+00 2.201712402343750000e+03 1.990074276924133301e+00 5.000000000000000000e+00 4.000000000000000000e+00 1.774266815185546875e+02 4.075000000000000000e+01 6.075000000000000000e+01
6.700000000000000000e+01 6.448384615384615017e+02 3.585668640136718750e+02 3.666381835937500000e-01 0.000000000000000000e+00 5.882352963089942932e-02 2.196019042968750000e+03 1.996657609939575195e+00 5.000000000000000000e+00 4.000000000000000000e+00 2.179660186767578125e+02 4.125000000000000000e+01 6.075000000000000000e+01
5.200000000000000000e+01 6.137000000000001592e+02 3.416638488769531250e+02 2.687072753906250000e-01 0.000000000000000000e+00 0.000000000000000000e+00 2.185616210937500000e+03 1.714076399803161621e+00 5.000000000000000000e+00 4.000000000000000000e+00 1.567240447998046875e+02 4.175000000000000000e+01 6.075000000000000000e+01
6.500000000000000000e+01 6.035923076923074859e+02 3.314440307617187500e+02 1.708068847656250000e-01 0.000000000000000000e+00 0.000000000000000000e+00 2.175213378906250000e+03 1.180255293846130371e+00 2.000000000000000000e+00 4.000000000000000000e+00 1.563717956542968750e+02 4.225000000000000000e+01 6.075000000000000000e+01
4.000000000000000000e+01 5.904461538461538339e+02 3.292787475585937500e+02 7.290649414062500000e-02 0.000000000000000000e+00 0.000000000000000000e+00 2.164810546875000000e+03 2.017354965209960938e+00 2.000000000000000000e+00 3.000000000000000000e+00 1.243980178833007812e+02 4.275000000000000000e+01 6.075000000000000000e+01
6.500000000000000000e+01 6.074769230769232990e+02 3.300284118652343750e+02 -2.758789062500000000e-02 0.000000000000000000e+00 0.000000000000000000e+00 2.154174072265625000e+03 2.009446859359741211e+00 5.000000000000000000e+00 4.000000000000000000e+00 1.253462371826171875e+02 4.325000000000000000e+01 6.075000000000000000e+01
3.800000000000000000e+01 6.137769230769230262e+02 3.315078735351562500e+02 -1.358032226562500000e-01 0.000000000000000000e+00 5.882352963089942932e-02 2.142836669921875000e+03 2.001546859741210938e+00 5.000000000000000000e+00 3.000000000000000000e+00 1.207083740234375000e+02 4.375000000000000000e+01 6.075000000000000000e+01
5.100000000000000000e+01 6.190153846153848463e+02 3.331972045898437500e+02 -2.439880371093750000e-01 0.000000000000000000e+00 0.000000000000000000e+00 2.131499023437500000e+03 2.000046253204345703e+00 5.000000000000000000e+00 4.000000000000000000e+00 1.511902618408203125e+02 4.425000000000000000e+01 6.075000000000000000e+01
6.300000000000000000e+01 6.207846153846152220e+02 3.355325317382812500e+02 -3.522033691406250000e-01 0.000000000000000000e+00 2.352941185235977173e-01 2.120161621093750000e+03 2.001331567764282227e+00 5.000000000000000000e+00 4.000000000000000000e+00 1.553637390136718750e+02 4.475000000000000000e+01 6.075000000000000000e+01
6.300000000000000000e+01 6.272692307692307168e+02 3.399066467285156250e+02 -4.394531250000000000e-01 0.000000000000000000e+00 0.000000000000000000e+00 2.110144287109375000e+03 1.887115955352783203e+00 5.000000000000000000e+00 4.000000000000000000e+00 1.385927581787109375e+02 4.525000000000000000e+01 6.075000000000000000e+01
5.500000000000000000e+01 6.297769230769231399e+02 3.420338134765625000e+02 -5.057373046875000000e-01 0.000000000000000000e+00 0.000000000000000000e+00 2.101447021484375000e+03 1.379682779312133789e+00 5.000000000000000000e+00 4.000000000000000000e+00 1.480544433593750000e+02 4.575000000000000000e+01 6.075000000000000000e+01
6.300000000000000000e+01 6.179615384615382254e+02 3.448874816894531250e+02 -6.383361816406250000e-01 0.000000000000000000e+00 2.941176593303680420e-01 2.084052490234375000e+03 1.934954881668090820e+00 2.000000000000000000e+00 4.000000000000000000e+00 1.703052062988281250e+02 4.675000000000000000e+01 6.075000000000000000e+01
4.100000000000000000e+01 6.166307692307689194e+02 3.479268798828125000e+02 -6.696472167968750000e-01 0.000000000000000000e+00 0.000000000000000000e+00 2.079992675781250000e+03 1.186012148857116699e+00 5.000000000000000000e+00 3.000000000000000000e+00 1.352126312255859375e+02 4.725000000000000000e+01 6.075000000000000000e+01
1.900000000000000000e+01 6.055000000000001137e+02 3.516629028320312500e+02 -6.893310546875000000e-01 0.000000000000000000e+00 0.000000000000000000e+00 2.077478515625000000e+03 1.171230077743530273e+00 5.000000000000000000e+00 1.000000000000000000e+00 1.302631988525390625e+02 4.775000000000000000e+01 6.075000000000000000e+01
2.300000000000000000e+01 6.072384615384615927e+02 3.544395141601562500e+02 -7.089843750000000000e-01 0.000000000000000000e+00 0.000000000000000000e+00 2.074964355468750000e+03 8.186164498329162598e-01 5.000000000000000000e+00 3.000000000000000000e+00 1.770975341796875000e+02 4.825000000000000000e+01 6.075000000000000000e+01
6.400000000000000000e+01 6.189999999999993179e+02 3.527245483398437500e+02 -7.286376953125000000e-01 0.000000000000000000e+00 2.352941185235977173e-01 2.072450439453125000e+03 8.191157579421997070e-01 5.000000000000000000e+00 4.000000000000000000e+00 1.653570861816406250e+02 4.875000000000000000e+01 6.075000000000000000e+01
6.400000000000000000e+01 6.277846153846152220e+02 3.520903320312500000e+02 -7.364807128906250000e-01 0.000000000000000000e+00 0.000000000000000000e+00 2.069923339843750000e+03 8.187758922576904297e-01 2.000000000000000000e+00 4.000000000000000000e+00 1.687285308837890625e+02 4.925000000000000000e+01 6.075000000000000000e+01
7.600000000000000000e+01 6.348769230769229353e+02 3.532133789062500000e+02 -7.443542480468750000e-01 0.000000000000000000e+00 0.000000000000000000e+00 2.067396484375000000e+03 8.195770978927612305e-01 2.000000000000000000e+00 4.000000000000000000e+00 1.968005065917968750e+02 4.975000000000000000e+01 6.075000000000000000e+01
1.300000000000000000e+01 6.289615384615384528e+02 3.530685729980468750e+02 -7.521972656250000000e-01 0.000000000000000000e+00 0.000000000000000000e+00 2.064869628906250000e+03 8.797097802162170410e-01 5.000000000000000000e+00 1.000000000000000000e+00 1.202810745239257812e+02 5.025000000000000000e+01 6.075000000000000000e+01
6.700000000000000000e+01 6.253307692307693060e+02 3.523806152343750000e+02 -7.689819335937500000e-01 0.000000000000000000e+00 0.000000000000000000e+00 2.060581054687500000e+03 1.197141885757446289e+00 5.000000000000000000e+00 4.000000000000000000e+00 1.769331054687500000e+02 5.075000000000000000e+01 6.075000000000000000e+01
6.300000000000000000e+01 6.288461538461539249e+02 3.515824279785156250e+02 -8.125610351562500000e-01 0.000000000000000000e+00 0.000000000000000000e+00 2.051007812500000000e+03 1.907698035240173340e+00 2.000000000000000000e+00 4.000000000000000000e+00 1.751891479492187500e+02 5.125000000000000000e+01 6.075000000000000000e+01
2.700000000000000000e+01 6.325384615384615472e+02 3.524680786132812500e+02 -8.561401367187500000e-01 0.000000000000000000e+00 2.941176593303680420e-01 2.041434326171875000e+03 1.582965016365051270e+00 2.000000000000000000e+00 3.000000000000000000e+00 2.161265411376953125e+02 5.175000000000000000e+01 6.075000000000000000e+01
6.400000000000000000e+01 6.249769230769231854e+02 3.547246704101562500e+02 -8.997192382812500000e-01 0.000000000000000000e+00 2.941176593303680420e-01 2.031860961914062500e+03 2.015817880630493164e+00 2.000000000000000000e+00 4.000000000000000000e+00 2.115337066650390625e+02 5.225000000000000000e+01 6.075000000000000000e+01
5.000000000000000000e+01 6.298230769230769965e+02 3.581263427734375000e+02 -9.812927246093750000e-01 0.000000000000000000e+00 0.000000000000000000e+00 2.018777954101562500e+03 2.009373426437377930e+00 2.000000000000000000e+00 4.000000000000000000e+00 1.996138458251953125e+02 5.275000000000000000e+01 6.075000000000000000e+01
6.900000000000000000e+01 6.305692307692308987e+02 3.611538696289062500e+02 -1.100860595703125000e+00 0.000000000000000000e+00 2.352941185235977173e-01 2.002185180664062500e+03 1.999432563781738281e+00 5.000000000000000000e+00 4.000000000000000000e+00 1.852635040283203125e+02 5.325000000000000000e+01 6.075000000000000000e+01
3.800000000000000000e+01 6.360076923076924231e+02 3.642001647949218750e+02 -1.220428466796875000e+00 0.000000000000000000e+00 2.352941185235977173e-01 1.985592407226562500e+03 1.928869485855102539e+00 5.000000000000000000e+00 3.000000000000000000e+00 2.215072021484375000e+02 5.375000000000000000e+01 6.075000000000000000e+01
5.700000000000000000e+01 6.441384615384613426e+02 3.684588928222656250e+02 -1.340026855468750000e+00 0.000000000000000000e+00 0.000000000000000000e+00 1.968999633789062500e+03 1.975735068321228027e+00 5.000000000000000000e+00 4.000000000000000000e+00 2.210894622802734375e+02 5.425000000000000000e+01 6.075000000000000000e+01
6.100000000000000000e+01 6.614615384615385665e+02 3.768068847656250000e+02 -1.509338378906250000e+00 0.000000000000000000e+00 2.352941185235977173e-01 1.950380004882812500e+03 1.783841371536254883e+00 5.000000000000000000e+00 4.000000000000000000e+00 1.891984405517578125e+02 5.475000000000000000e+01 6.075000000000000000e+01
6.800000000000000000e+01 6.764999999999998863e+02 3.940758666992187500e+02 -1.695251464843750000e+00 0.000000000000000000e+00 0.000000000000000000e+00 1.931084716796875000e+03 1.980280518531799316e+00 5.000000000000000000e+00 4.000000000000000000e+00 1.628851623535156250e+02 5.525000000000000000e+01 6.075000000000000000e+01
6.800000000000000000e+01 6.896000000000004775e+02 4.148280639648437500e+02 -1.881134033203125000e+00 0.000000000000000000e+00 0.000000000000000000e+00 1.911789306640625000e+03 1.158770918846130371e+00 5.000000000000000000e+00 4.000000000000000000e+00 1.765562286376953125e+02 5.575000000000000000e+01 6.075000000000000000e+01
6.700000000000000000e+01 7.039538461538463707e+02 4.321589965820312500e+02 -2.067047119140625000e+00 9.999999776482582092e-03 0.000000000000000000e+00 1.892494018554687500e+03 1.852699637413024902e+00 5.000000000000000000e+00 4.000000000000000000e+00 2.108076934814453125e+02 5.625000000000000000e+01 6.075000000000000000e+01
2.500000000000000000e+01 7.103846153846152447e+02 4.403554382324218750e+02 -2.215362548828125000e+00 9.999999776482582092e-03 0.000000000000000000e+00 1.875848632812500000e+03 1.933533549308776855e+00 5.000000000000000000e+00 3.000000000000000000e+00 2.010334167480468750e+02 5.675000000000000000e+01 6.075000000000000000e+01
7.200000000000000000e+01 7.063230769230768828e+02 4.401487731933593750e+02 -2.363647460937500000e+00 9.999999776482582092e-03 0.000000000000000000e+00 1.859203125000000000e+03 1.900941252708435059e+00 5.000000000000000000e+00 4.000000000000000000e+00 2.641528320312500000e+02 5.725000000000000000e+01 6.075000000000000000e+01
5.600000000000000000e+01 6.933999999999998636e+02 4.292858886718750000e+02 -2.511932373046875000e+00 9.999999776482582092e-03 2.941176593303680420e-01 1.842557739257812500e+03 1.860636472702026367e+00 5.000000000000000000e+00 4.000000000000000000e+00 2.998244628906250000e+02 5.775000000000000000e+01 6.075000000000000000e+01
7.500000000000000000e+01 6.819307692307691013e+02 3.996035766601562500e+02 -2.637268066406250000e+00 1.522077769041061401e-01 0.000000000000000000e+00 1.829478027343750000e+03 1.807710409164428711e+00 1.300000000000000000e+01 4.000000000000000000e+00 4.218287353515625000e+02 5.825000000000000000e+01 6.075000000000000000e+01
7.200000000000000000e+01 6.673307692307690786e+02 3.568432312011718750e+02 -2.693725585937500000e+00 9.999999776482582092e-03 0.000000000000000000e+00 1.827095458984375000e+03 1.747155427932739258e+00 1.300000000000000000e+01 4.000000000000000000e+00 2.448694610595703125e+02 5.875000000000000000e+01 6.075000000000000000e+01
7.000000000000000000e+01 6.496923076923073950e+02 3.176573791503906250e+02 -2.750152587890625000e+00 2.380218356847763062e-01 0.000000000000000000e+00 1.824713012695312500e+03 1.728765130043029785e+00 1.300000000000000000e+01 4.000000000000000000e+00 5.233076782226562500e+02 5.925000000000000000e+01 6.075000000000000000e+01
6.900000000000000000e+01 6.023000000000000682e+02 2.972515869140625000e+02 -2.806610107421875000e+00 9.999999776482582092e-03 2.352941185235977173e-01 1.822330444335937500e+03 1.786939620971679688e+00 1.300000000000000000e+01 4.000000000000000000e+00 2.670961608886718750e+02 5.975000000000000000e+01 6.075000000000000000e+01
4.700000000000000000e+01 5.641461538461541068e+02 2.891517333984375000e+02 -2.791625976562500000e+00 9.999999776482582092e-03 2.352941185235977173e-01 1.831171508789062500e+03 1.862939238548278809e+00 1.300000000000000000e+01 4.000000000000000000e+00 2.008347930908203125e+02 6.025000000000000000e+01 6.075000000000000000e+01
2.600000000000000000e+01 5.515230769230769283e+02 2.825025024414062500e+02 -2.705230712890625000e+00 9.999999776482582092e-03 0.000000000000000000e+00 1.851236083984375000e+03 1.910729289054870605e+00 1.300000000000000000e+01 3.000000000000000000e+00 1.139537048339843750e+02 6.075000000000000000e+01 6.075000000000000000e+01
3.500000000000000000e+01 5.438153846153848008e+02 2.760561828613281250e+02 -2.618835449218750000e+00 9.999999776482582092e-03 5.882353186607360840e-01 1.871300659179687500e+03 1.937978386878967285e+00 5.000000000000000000e+00 3.000000000000000000e+00 1.299955596923828125e+02 6.125000000000000000e+01 6.075000000000000000e+01
6.200000000000000000e+01 5.454000000000003183e+02 2.671868286132812500e+02 -2.532409667968750000e+00 9.999999776482582092e-03 2.941176593303680420e-01 1.891365234375000000e+03 1.948004841804504395e+00 5.000000000000000000e+00 4.000000000000000000e+00 9.566086578369140625e+01 6.175000000000000000e+01 6.075000000000000000e+01
4.000000000000000000e+01 5.412076923076921275e+02 2.563494873046875000e+02 -2.421264648437500000e+00 9.999999776482582092e-03 2.352941185235977173e-01 1.908545288085937500e+03 1.946312308311462402e+00 5.000000000000000000e+00 3.000000000000000000e+00 6.819770812988281250e+01 6.225000000000000000e+01 6.075000000000000000e+01
1.500000000000000000e+01 5.444615384615383391e+02 2.450706176757812500e+02 -2.301849365234375000e+00 9.999999776482582092e-03 0.000000000000000000e+00 1.924763793945312500e+03 1.946832418441772461e+00 5.000000000000000000e+00 1.000000000000000000e+00 9.835849761962890625e+01 6.275000000000000000e+01 6.075000000000000000e+01
2.200000000000000000e+01 5.436692307692309214e+02 2.342275543212890625e+02 -2.182434082031250000e+00 9.999999776482582092e-03 2.941176593303680420e-01 1.940982421875000000e+03 1.944428801536560059e+00 1.500000000000000000e+01 3.000000000000000000e+00 6.869570159912109375e+01 6.325000000000000000e+01 6.075000000000000000e+01
5.000000000000000000e+00 5.455846153846152902e+02 2.257380371093750000e+02 -2.063018798828125000e+00 9.999999776482582092e-03 3.529411852359771729e-01 1.957201049804687500e+03 1.936294913291931152e+00 5.000000000000000000e+00 1.000000000000000000e+00 7.331973266601562500e+01 6.375000000000000000e+01 6.075000000000000000e+01
1.300000000000000000e+01 5.714615384615387939e+02 2.593977050781250000e+02 -1.868835449218750000e+00 9.999999776482582092e-03 0.000000000000000000e+00 1.987005493164062500e+03 1.693122386932373047e+00 1.500000000000000000e+01 1.000000000000000000e+00 6.588290405273437500e+01 6.575000000000000000e+01 6.075000000000000000e+01
8.000000000000000000e+00 5.706461538461539931e+02 2.703584594726562500e+02 -1.915008544921875000e+00 9.999999776482582092e-03 0.000000000000000000e+00 1.983519653320312500e+03 1.821436405181884766e+00 1.500000000000000000e+01 1.000000000000000000e+00 6.351916503906250000e+01 6.625000000000000000e+01 6.075000000000000000e+01
8.000000000000000000e+00 5.637384615384615927e+02 2.844089355468750000e+02 -1.961151123046875000e+00 9.999999776482582092e-03 0.000000000000000000e+00 1.980033813476562500e+03 1.930422186851501465e+00 1.500000000000000000e+01 1.000000000000000000e+00 7.897666931152343750e+01 6.675000000000000000e+01 6.075000000000000000e+01
1.000000000000000000e+01 5.596769230769233445e+02 2.978793029785156250e+02 -2.007324218750000000e+00 9.999999776482582092e-03 0.000000000000000000e+00 1.976547973632812500e+03 1.926345109939575195e+00 1.500000000000000000e+01 1.000000000000000000e+00 7.089347076416015625e+01 6.725000000000000000e+01 6.075000000000000000e+01
4.600000000000000000e+01 6.880923076923080544e+02 3.464572143554687500e+02 6.212158203125000000e-01 0.000000000000000000e+00 0.000000000000000000e+00 2.213115234375000000e+03 1.990436315536499023e+00 2.000000000000000000e+00 4.000000000000000000e+00 1.179143142700195312e+02 3.375000000000000000e+01 6.125000000000000000e+01
5.900000000000000000e+01 6.923769230769231626e+02 3.367792663574218750e+02 7.226562500000000000e-01 0.000000000000000000e+00 0.000000000000000000e+00 2.214104003906250000e+03 1.989845275878906250e+00 2.000000000000000000e+00 4.000000000000000000e+00 1.462811584472656250e+02 3.425000000000000000e+01 6.125000000000000000e+01
6.300000000000000000e+01 6.629307692307694424e+02 3.262782287597656250e+02 8.240966796875000000e-01 0.000000000000000000e+00 3.529411852359771729e-01 2.215092773437500000e+03 2.322358369827270508e+00 2.000000000000000000e+00 4.000000000000000000e+00 5.110121917724609375e+01 3.475000000000000000e+01 6.125000000000000000e+01
6.900000000000000000e+01 6.814000000000000909e+02 3.152083129882812500e+02 9.255065917968750000e-01 0.000000000000000000e+00 0.000000000000000000e+00 2.216081787109375000e+03 3.125921487808227539e+00 2.000000000000000000e+00 4.000000000000000000e+00 8.083142852783203125e+01 3.525000000000000000e+01 6.125000000000000000e+01
3.400000000000000000e+01 6.756153846153843006e+02 3.112854614257812500e+02 7.023620605468750000e-01 0.000000000000000000e+00 0.000000000000000000e+00 2.187374755859375000e+03 2.026484489440917969e+00 5.000000000000000000e+00 3.000000000000000000e+00 2.173093872070312500e+02 3.725000000000000000e+01 6.125000000000000000e+01
4.600000000000000000e+01 6.550307692307688967e+02 3.311764526367187500e+02 6.405639648437500000e-01 0.000000000000000000e+00 0.000000000000000000e+00 2.182415771484375000e+03 2.028256893157958984e+00 5.000000000000000000e+00 4.000000000000000000e+00 2.265850677490234375e+02 3.775000000000000000e+01 6.125000000000000000e+01
5.800000000000000000e+01 6.514692307692309896e+02 3.469757995605468750e+02 6.089782714843750000e-01 0.000000000000000000e+00 0.000000000000000000e+00 2.181558837890625000e+03 2.028182506561279297e+00 5.000000000000000000e+00 4.000000000000000000e+00 1.522736511230468750e+02 3.825000000000000000e+01 6.125000000000000000e+01
7.300000000000000000e+01 6.376307692307696016e+02 3.762522277832031250e+02 5.458679199218750000e-01 0.000000000000000000e+00 0.000000000000000000e+00 2.179845214843750000e+03 2.016244649887084961e+00 5.000000000000000000e+00 4.000000000000000000e+00 1.698323059082031250e+02 3.925000000000000000e+01 6.125000000000000000e+01
5.400000000000000000e+01 6.268923076923075541e+02 3.877141113281250000e+02 4.797973632812500000e-01 0.000000000000000000e+00 0.000000000000000000e+00 2.173814453125000000e+03 2.000678539276123047e+00 5.000000000000000000e+00 4.000000000000000000e+00 1.750230407714843750e+02 3.975000000000000000e+01 6.125000000000000000e+01
5.600000000000000000e+01 6.866846153846151992e+02 3.925133972167968750e+02 4.022521972656250000e-01 0.000000000000000000e+00 0.000000000000000000e+00 2.166059326171875000e+03 1.978463411331176758e+00 5.000000000000000000e+00 4.000000000000000000e+00 1.171760101318359375e+02 4.025000000000000000e+01 6.125000000000000000e+01
6.600000000000000000e+01 6.695076923076923094e+02 3.845998229980468750e+02 3.247070312500000000e-01 0.000000000000000000e+00 0.000000000000000000e+00 2.158303955078125000e+03 1.971029639244079590e+00 5.000000000000000000e+00 4.000000000000000000e+00 1.864162445068359375e+02 4.075000000000000000e+01 6.125000000000000000e+01
5.800000000000000000e+01 6.412999999999998408e+02 3.615416564941406250e+02 2.471618652343750000e-01 0.000000000000000000e+00 0.000000000000000000e+00 2.150548828125000000e+03 1.978190898895263672e+00 5.000000000000000000e+00 4.000000000000000000e+00 1.798002319335937500e+02 4.125000000000000000e+01 6.125000000000000000e+01
7.400000000000000000e+01 6.216538461538460751e+02 3.386549377441406250e+02 1.283569335937500000e-01 0.000000000000000000e+00 0.000000000000000000e+00 2.137815673828125000e+03 1.985013961791992188e+00 5.000000000000000000e+00 4.000000000000000000e+00 1.519254760742187500e+02 4.175000000000000000e+01 6.125000000000000000e+01
6.000000000000000000e+01 5.924076923076925141e+02 3.253204040527343750e+02 9.552001953125000000e-03 0.000000000000000000e+00 0.000000000000000000e+00 2.125082519531250000e+03 2.007800817489624023e+00 2.000000000000000000e+00 4.000000000000000000e+00 9.237566375732421875e+01 4.225000000000000000e+01 6.125000000000000000e+01
4.400000000000000000e+01 5.658538461538456659e+02 3.225668945312500000e+02 -1.092529296875000000e-01 0.000000000000000000e+00 2.941176593303680420e-01 2.112349365234375000e+03 2.013079643249511719e+00 2.000000000000000000e+00 3.000000000000000000e+00 9.944871520996093750e+01 4.275000000000000000e+01 6.125000000000000000e+01
5.400000000000000000e+01 6.017153846153846644e+02 3.218271484375000000e+02 -2.313537597656250000e-01 0.000000000000000000e+00 0.000000000000000000e+00 2.099373779296875000e+03 2.000612258911132812e+00 5.000000000000000000e+00 4.000000000000000000e+00 1.620386962890625000e+02 4.325000000000000000e+01 6.125000000000000000e+01
6.400000000000000000e+01 6.116846153846156540e+02 3.208089599609375000e+02 -3.634338378906250000e-01 0.000000000000000000e+00 5.294117927551269531e-01 2.085671142578125000e+03 1.983117341995239258e+00 5.000000000000000000e+00 4.000000000000000000e+00 1.483992309570312500e+02 4.375000000000000000e+01 6.125000000000000000e+01
6.100000000000000000e+01 6.288923076923073268e+02 3.194263000488281250e+02 -4.955139160156250000e-01 0.000000000000000000e+00 0.000000000000000000e+00 2.071968505859375000e+03 1.973604083061218262e+00 5.000000000000000000e+00 4.000000000000000000e+00 1.856205596923828125e+02 4.425000000000000000e+01 6.125000000000000000e+01
6.100000000000000000e+01 6.315307692307693515e+02 3.205653991699218750e+02 -6.276245117187500000e-01 0.000000000000000000e+00 0.000000000000000000e+00 2.058265869140625000e+03 1.969241023063659668e+00 5.000000000000000000e+00 4.000000000000000000e+00 9.347317504882812500e+01 4.475000000000000000e+01 6.125000000000000000e+01
7.000000000000000000e+01 6.309153846153847098e+02 3.257906799316406250e+02 -7.349853515625000000e-01 0.000000000000000000e+00 0.000000000000000000e+00 2.046203613281250000e+03 1.967704415321350098e+00 5.000000000000000000e+00 4.000000000000000000e+00 1.475811462402343750e+02 4.525000000000000000e+01 6.125000000000000000e+01
6.500000000000000000e+01 6.309923076923079179e+02 3.302323608398437500e+02 -8.176879882812500000e-01 0.000000000000000000e+00 0.000000000000000000e+00 2.035781616210937500e+03 1.970754504203796387e+00 5.000000000000000000e+00 4.000000000000000000e+00 2.281150512695312500e+02 4.575000000000000000e+01 6.125000000000000000e+01
5.000000000000000000e+01 6.085230769230768146e+02 3.332257690429687500e+02 -9.003601074218750000e-01 0.000000000000000000e+00 0.000000000000000000e+00 2.025359619140625000e+03 1.790377855300903320e+00 2.000000000000000000e+00 4.000000000000000000e+00 1.800630950927734375e+02 4.625000000000000000e+01 6.125000000000000000e+01
1.300000000000000000e+01 5.905769230769229807e+02 3.349230346679687500e+02 -9.830627441406250000e-01 0.000000000000000000e+00 0.000000000000000000e+00 2.014937744140625000e+03 1.480195879936218262e+00 2.000000000000000000e+00 1.000000000000000000e+00 7.233236694335937500e+01 4.675000000000000000e+01 6.125000000000000000e+01
5.700000000000000000e+01 5.966538461538461888e+02 3.361998901367187500e+02 -1.025604248046875000e+00 0.000000000000000000e+00 2.941176593303680420e-01 2.009786499023437500e+03 1.463965415954589844e+00 2.000000000000000000e+00 4.000000000000000000e+00 1.077812042236328125e+02 4.725000000000000000e+01 6.125000000000000000e+01
1.300000000000000000e+01 5.908538461538462343e+02 3.370140991210937500e+02 -1.054748535156250000e+00 0.000000000000000000e+00 2.941176593303680420e-01 2.006392089843750000e+03 1.499888539314270020e+00 5.000000000000000000e+00 1.000000000000000000e+00 1.005844116210937500e+02 4.775000000000000000e+01 6.125000000000000000e+01
7.400000000000000000e+01 5.960307692307692378e+02 3.360603027343750000e+02 -1.083923339843750000e+00 0.000000000000000000e+00 0.000000000000000000e+00 2.002997802734375000e+03 8.091511726379394531e-01 5.000000000000000000e+00 4.000000000000000000e+00 1.718001098632812500e+02 4.825000000000000000e+01 6.125000000000000000e+01
7.200000000000000000e+01 6.094692307692309896e+02 3.340082397460937500e+02 -1.113067626953125000e+00 0.000000000000000000e+00 5.294117927551269531e-01 1.999603515625000000e+03 8.063845634460449219e-01 5.000000000000000000e+00 4.000000000000000000e+00 1.689134826660156250e+02 4.875000000000000000e+01 6.125000000000000000e+01
7.200000000000000000e+01 6.229230769230770193e+02 3.351286926269531250e+02 -1.123443603515625000e+00 0.000000000000000000e+00 0.000000000000000000e+00 1.996642211914062500e+03 1.533491849899291992e+00 5.000000000000000000e+00 4.000000000000000000e+00 1.637276306152343750e+02 4.925000000000000000e+01 6.125000000000000000e+01
7.300000000000000000e+01 6.238846153846152447e+02 3.384916076660156250e+02 -1.133789062500000000e+00 0.000000000000000000e+00 0.000000000000000000e+00 1.993680786132812500e+03 1.776984333992004395e+00 5.000000000000000000e+00 4.000000000000000000e+00 1.646707916259765625e+02 4.975000000000000000e+01 6.125000000000000000e+01
7.500000000000000000e+01 6.291230769230768374e+02 3.423577575683593750e+02 -1.144165039062500000e+00 0.000000000000000000e+00 0.000000000000000000e+00 1.990719482421875000e+03 1.964138150215148926e+00 5.000000000000000000e+00 4.000000000000000000e+00 1.300463409423828125e+02 5.025000000000000000e+01 6.125000000000000000e+01
5.900000000000000000e+01 6.233769230769229353e+02 3.456112060546875000e+02 -1.160949707031250000e+00 0.000000000000000000e+00 5.882352963089942932e-02 1.986231323242187500e+03 1.989736080169677734e+00 5.000000000000000000e+00 4.000000000000000000e+00 1.228660430908203125e+02 5.075000000000000000e+01 6.125000000000000000e+01
6.100000000000000000e+01 6.251923076923077360e+02 3.478697204589843750e+02 -1.196990966796875000e+00 0.000000000000000000e+00 0.000000000000000000e+00 1.977162353515625000e+03 1.987258911132812500e+00 5.000000000000000000e+00 4.000000000000000000e+00 1.488752136230468750e+02 5.125000000000000000e+01 6.125000000000000000e+01
3.300000000000000000e+01 6.290923076923075996e+02 3.480807495117187500e+02 -1.233032226562500000e+00 0.000000000000000000e+00 0.000000000000000000e+00 1.968093505859375000e+03 1.982075810432434082e+00 5.000000000000000000e+00 3.000000000000000000e+00 1.627029876708984375e+02 5.175000000000000000e+01 6.125000000000000000e+01
6.300000000000000000e+01 6.334153846153847098e+02 3.455940856933593750e+02 -1.269042968750000000e+00 0.000000000000000000e+00 0.000000000000000000e+00 1.959024658203125000e+03 1.976510763168334961e+00 5.000000000000000000e+00 4.000000000000000000e+00 1.721700134277343750e+02 5.225000000000000000e+01 6.125000000000000000e+01
5.400000000000000000e+01 6.275923076923078270e+02 3.459703674316406250e+02 -1.448760986328125000e+00 9.999999776482582092e-03 0.000000000000000000e+00 1.931617187500000000e+03 1.955510616302490234e+00 5.000000000000000000e+00 4.000000000000000000e+00 1.976551666259765625e+02 5.325000000000000000e+01 6.125000000000000000e+01
4.600000000000000000e+01 6.343615384615384301e+02 3.484369506835937500e+02 -1.556549072265625000e+00 0.000000000000000000e+00 0.000000000000000000e+00 1.916368408203125000e+03 1.515452504158020020e+00 5.000000000000000000e+00 4.000000000000000000e+00 1.289159240722656250e+02 5.375000000000000000e+01 6.125000000000000000e+01
5.600000000000000000e+01 6.361923076923073950e+02 3.534934692382812500e+02 -1.664337158203125000e+00 0.000000000000000000e+00 0.000000000000000000e+00 1.901119750976562500e+03 1.103283762931823730e+00 5.000000000000000000e+00 4.000000000000000000e+00 1.141750640869140625e+02 5.425000000000000000e+01 6.125000000000000000e+01
6.800000000000000000e+01 6.488615384615385437e+02 3.635703735351562500e+02 -1.818023681640625000e+00 0.000000000000000000e+00 0.000000000000000000e+00 1.883813476562500000e+03 1.709467768669128418e+00 5.000000000000000000e+00 4.000000000000000000e+00 1.621928863525390625e+02 5.475000000000000000e+01 6.125000000000000000e+01
6.500000000000000000e+01 6.603538461538462343e+02 3.786380310058593750e+02 -1.986999511718750000e+00 9.999999776482582092e-03 0.000000000000000000e+00 1.865821289062500000e+03 1.602487683296203613e+00 5.000000000000000000e+00 4.000000000000000000e+00 1.923818511962890625e+02 5.525000000000000000e+01 6.125000000000000000e+01
4.500000000000000000e+01 6.783384615384615017e+02 3.977879638671875000e+02 -2.155975341796875000e+00 9.999999776482582092e-03 0.000000000000000000e+00 1.847829101562500000e+03 1.924843907356262207e+00 5.000000000000000000e+00 4.000000000000000000e+00 2.042276306152343750e+02 5.575000000000000000e+01 6.125000000000000000e+01
6.400000000000000000e+01 6.846153846153843006e+02 4.151020812988281250e+02 -2.324951171875000000e+00 9.999999776482582092e-03 0.000000000000000000e+00 1.829836914062500000e+03 1.918608427047729492e+00 5.000000000000000000e+00 4.000000000000000000e+00 2.073897399902343750e+02 5.625000000000000000e+01 6.125000000000000000e+01
6.800000000000000000e+01 6.893461538461540385e+02 4.258064575195312500e+02 -2.479064941406250000e+00 9.999999776482582092e-03 2.352941185235977173e-01 1.812053955078125000e+03 1.783876657485961914e+00 5.000000000000000000e+00 4.000000000000000000e+00 1.528598785400390625e+02 5.675000000000000000e+01 6.125000000000000000e+01
8.000000000000000000e+00 6.848846153846153584e+02 4.286051940917968750e+02 -2.633148193359375000e+00 9.999999776482582092e-03 2.352941185235977173e-01 1.794270874023437500e+03 1.871433258056640625e+00 5.000000000000000000e+00 1.000000000000000000e+00 1.698454895019531250e+02 5.725000000000000000e+01 6.125000000000000000e+01
6.100000000000000000e+01 6.767307692307690559e+02 4.173305969238281250e+02 -2.787261962890625000e+00 1.194610744714736938e-01 0.000000000000000000e+00 1.776487915039062500e+03 1.835131645202636719e+00 5.000000000000000000e+00 4.000000000000000000e+00 3.058132324218750000e+02 5.775000000000000000e+01 6.125000000000000000e+01
7.500000000000000000e+01 6.650000000000000000e+02 3.850020141601562500e+02 -2.920898437500000000e+00 9.999999776482582092e-03 0.000000000000000000e+00 1.761854980468750000e+03 1.793074250221252441e+00 1.300000000000000000e+01 4.000000000000000000e+00 2.097591552734375000e+02 5.825000000000000000e+01 6.125000000000000000e+01
6.800000000000000000e+01 6.517307692307695106e+02 3.416839904785156250e+02 -2.993225097656250000e+00 1.153591647744178772e-01 2.941176593303680420e-01 1.756672851562500000e+03 1.721818923950195312e+00 1.300000000000000000e+01 4.000000000000000000e+00 2.999360351562500000e+02 5.875000000000000000e+01 6.125000000000000000e+01
3.000000000000000000e+00 6.428384615384616154e+02 3.085724487304687500e+02 -3.065551757812500000e+00 7.709467411041259766e-01 0.000000000000000000e+00 1.751490600585937500e+03 1.605805635452270508e+00 1.300000000000000000e+01 1.000000000000000000e+00 7.846749267578125000e+02 5.925000000000000000e+01 6.125000000000000000e+01
5.000000000000000000e+01 6.057076923076924686e+02 2.926264953613281250e+02 -3.137878417968750000e+00 1.755865514278411865e-01 7.647058963775634766e-01 1.746308471679687500e+03 1.732312321662902832e+00 1.300000000000000000e+01 4.000000000000000000e+00 3.538698730468750000e+02 5.975000000000000000e+01 6.125000000000000000e+01
4.800000000000000000e+01 5.695615384615387029e+02 2.831205749511718750e+02 -3.133392333984375000e+00 1.069402843713760376e-01 4.705882370471954346e-01 1.754276611328125000e+03 1.827490687370300293e+00 1.300000000000000000e+01 4.000000000000000000e+00 2.374790039062500000e+02 6.025000000000000000e+01 6.125000000000000000e+01
5.700000000000000000e+01 5.489076923076921730e+02 2.779038391113281250e+02 -3.052124023437500000e+00 9.999999776482582092e-03 2.352941185235977173e-01 1.775395019531250000e+03 1.884034514427185059e+00 1.300000000000000000e+01 4.000000000000000000e+00 1.793502044677734375e+02 6.075000000000000000e+01 6.125000000000000000e+01
5.900000000000000000e+01 5.359307692307688740e+02 2.732719726562500000e+02 -2.970825195312500000e+00 9.999999776482582092e-03 0.000000000000000000e+00 1.796513549804687500e+03 1.904105544090270996e+00 2.000000000000000000e+00 4.000000000000000000e+00 1.274374008178710938e+02 6.125000000000000000e+01 6.125000000000000000e+01
2.900000000000000000e+01 5.343461538461538112e+02 2.672682800292968750e+02 -2.889556884765625000e+00 9.999999776482582092e-03 0.000000000000000000e+00 1.817631958007812500e+03 1.909685134887695312e+00 5.000000000000000000e+00 3.000000000000000000e+00 1.318246459960937500e+02 6.175000000000000000e+01 6.125000000000000000e+01
4.400000000000000000e+01 5.393153846153844597e+02 2.615821228027343750e+02 -2.783233642578125000e+00 9.999999776482582092e-03 0.000000000000000000e+00 1.835057617187500000e+03 1.903532147407531738e+00 2.000000000000000000e+00 3.000000000000000000e+00 1.332598571777343750e+02 6.225000000000000000e+01 6.125000000000000000e+01
6.000000000000000000e+01 5.365307692307692378e+02 2.569109802246093750e+02 -2.668548583984375000e+00 9.999999776482582092e-03 5.294117927551269531e-01 1.851252319335937500e+03 1.903866052627563477e+00 2.000000000000000000e+00 4.000000000000000000e+00 1.057080993652343750e+02 6.275000000000000000e+01 6.125000000000000000e+01
5.400000000000000000e+01 5.361384615384613426e+02 2.535982513427734375e+02 -2.553863525390625000e+00 9.999999776482582092e-03 0.000000000000000000e+00 1.867447021484375000e+03 1.903358459472656250e+00 2.000000000000000000e+00 4.000000000000000000e+00 8.584899902343750000e+01 6.325000000000000000e+01 6.125000000000000000e+01
4.100000000000000000e+01 5.525307692307691241e+02 2.576139221191406250e+02 -2.372009277343750000e+00 9.999999776482582092e-03 5.294117927551269531e-01 1.893973022460937500e+03 1.899271488189697266e+00 4.000000000000000000e+00 3.000000000000000000e+00 1.243884506225585938e+02 6.425000000000000000e+01 6.125000000000000000e+01
5.800000000000000000e+01 5.633076923076922640e+02 2.685419616699218750e+02 -2.304840087890625000e+00 9.999999776482582092e-03 0.000000000000000000e+00 1.904304199218750000e+03 1.861677885055541992e+00 4.000000000000000000e+00 4.000000000000000000e+00 1.083823776245117188e+02 6.475000000000000000e+01 6.125000000000000000e+01
5.000000000000000000e+01 5.710615384615383618e+02 2.791388549804687500e+02 -2.237640380859375000e+00 9.999999776482582092e-03 2.941176593303680420e-01 1.914635375976562500e+03 1.903418064117431641e+00 4.000000000000000000e+00 4.000000000000000000e+00 1.051330261230468750e+02 6.525000000000000000e+01 6.125000000000000000e+01
1.300000000000000000e+01 5.828769230769229353e+02 2.861063842773437500e+02 -2.193786621093750000e+00 9.999999776482582092e-03 0.000000000000000000e+00 1.921935913085937500e+03 1.904229402542114258e+00 1.500000000000000000e+01 1.000000000000000000e+00 9.998792266845703125e+01 6.575000000000000000e+01 6.125000000000000000e+01
7.500000000000000000e+01 5.791692307692308077e+02 2.948538208007812500e+02 -2.220001220703125000e+00 1.036137714982032776e-01 0.000000000000000000e+00 1.920144653320312500e+03 1.899750947952270508e+00 4.000000000000000000e+00 4.000000000000000000e+00 9.525832366943359375e+01 6.625000000000000000e+01 6.125000000000000000e+01
6.100000000000000000e+01 5.736769230769230035e+02 3.045482788085937500e+02 -2.246185302734375000e+00 9.999999776482582092e-03 8.235294222831726074e-01 1.918353271484375000e+03 1.894323110580444336e+00 4.000000000000000000e+00 4.000000000000000000e+00 5.216812896728515625e+01 6.675000000000000000e+01 6.125000000000000000e+01
3.800000000000000000e+01 5.621615384615380435e+02 3.114524536132812500e+02 -2.272399902343750000e+00 1.046591252088546753e-01 2.941176593303680420e-01 1.916561889648437500e+03 1.893212080001831055e+00 1.500000000000000000e+01 3.000000000000000000e+00 4.637503051757812500e+01 6.725000000000000000e+01 6.125000000000000000e+01
5.900000000000000000e+01 6.782999999999997272e+02 3.457213745117187500e+02 2.264404296875000000e-01 0.000000000000000000e+00 5.882352963089942932e-02 2.137002685546875000e+03 1.957878828048706055e+00 2.000000000000000000e+00 4.000000000000000000e+00 1.307759552001953125e+02 3.375000000000000000e+01 6.175000000000000000e+01
4.400000000000000000e+01 6.579538461538461434e+02 3.929182739257812500e+02 6.812133789062500000e-01 0.000000000000000000e+00 0.000000000000000000e+00 2.151586181640625000e+03 2.001415729522705078e+00 2.000000000000000000e+00 3.000000000000000000e+00 7.421736145019531250e+01 3.675000000000000000e+01 6.175000000000000000e+01
6.700000000000000000e+01 6.715769230769230944e+02 3.853037414550781250e+02 5.850219726562500000e-01 0.000000000000000000e+00 0.000000000000000000e+00 2.142581542968750000e+03 2.000401735305786133e+00 5.000000000000000000e+00 4.000000000000000000e+00 1.571545715332031250e+02 3.725000000000000000e+01 6.175000000000000000e+01
1.500000000000000000e+01 6.676307692307693742e+02 3.763173522949218750e+02 5.266418457031250000e-01 0.000000000000000000e+00 0.000000000000000000e+00 2.138587890625000000e+03 2.001626729965209961e+00 5.000000000000000000e+00 1.000000000000000000e+00 1.228252868652343750e+02 3.775000000000000000e+01 6.175000000000000000e+01
5.100000000000000000e+01 6.549923076923078042e+02 3.731769409179687500e+02 5.060424804687500000e-01 0.000000000000000000e+00 0.000000000000000000e+00 2.139604980468750000e+03 2.003093481063842773e+00 5.000000000000000000e+00 4.000000000000000000e+00 1.810352020263671875e+02 3.825000000000000000e+01 6.175000000000000000e+01
3.600000000000000000e+01 6.363307692307691923e+02 3.833262329101562500e+02 4.648437500000000000e-01 0.000000000000000000e+00 0.000000000000000000e+00 2.141638916015625000e+03 1.999909996986389160e+00 5.000000000000000000e+00 3.000000000000000000e+00 1.137264938354492188e+02 3.925000000000000000e+01 6.175000000000000000e+01
6.700000000000000000e+01 6.252230769230765191e+02 3.992073364257812500e+02 3.932800292968750000e-01 0.000000000000000000e+00 0.000000000000000000e+00 2.134530273437500000e+03 1.982945799827575684e+00 5.000000000000000000e+00 4.000000000000000000e+00 1.614783325195312500e+02 3.975000000000000000e+01 6.175000000000000000e+01
4.300000000000000000e+01 7.050923076923077133e+02 4.113657531738281250e+02 3.047485351562500000e-01 0.000000000000000000e+00 0.000000000000000000e+00 2.124712890625000000e+03 1.958155512809753418e+00 2.000000000000000000e+00 3.000000000000000000e+00 2.593191833496093750e+02 4.025000000000000000e+01 6.175000000000000000e+01
6.400000000000000000e+01 6.641461538461536520e+02 4.038366088867187500e+02 2.162170410156250000e-01 0.000000000000000000e+00 0.000000000000000000e+00 2.114895507812500000e+03 1.950353264808654785e+00 2.000000000000000000e+00 4.000000000000000000e+00 1.003766937255859375e+02 4.075000000000000000e+01 6.175000000000000000e+01
6.700000000000000000e+01 6.390076923076926505e+02 3.789220886230468750e+02 1.276550292968750000e-01 0.000000000000000000e+00 0.000000000000000000e+00 2.105078369140625000e+03 1.956271409988403320e+00 5.000000000000000000e+00 4.000000000000000000e+00 1.229633178710937500e+02 4.125000000000000000e+01 6.175000000000000000e+01
6.300000000000000000e+01 6.447923076923077588e+02 3.514934997558593750e+02 -1.202392578125000000e-02 0.000000000000000000e+00 5.882352963089942932e-02 2.090014892578125000e+03 1.963109135627746582e+00 5.000000000000000000e+00 4.000000000000000000e+00 2.136676483154296875e+02 4.175000000000000000e+01 6.175000000000000000e+01
2.900000000000000000e+01 5.941230769230772921e+02 3.333969116210937500e+02 -1.517028808593750000e-01 0.000000000000000000e+00 0.000000000000000000e+00 2.074951416015625000e+03 1.980019092559814453e+00 2.000000000000000000e+00 3.000000000000000000e+00 7.445318603515625000e+01 4.225000000000000000e+01 6.175000000000000000e+01
6.900000000000000000e+01 5.671999999999998181e+02 3.250804748535156250e+02 -2.913818359375000000e-01 0.000000000000000000e+00 0.000000000000000000e+00 2.059887939453125000e+03 1.987993121147155762e+00 2.000000000000000000e+00 4.000000000000000000e+00 7.832310485839843750e+01 4.275000000000000000e+01 6.175000000000000000e+01
7.200000000000000000e+01 6.049153846153845961e+02 3.203994445800781250e+02 -4.351501464843750000e-01 0.000000000000000000e+00 0.000000000000000000e+00 2.044573486328125000e+03 1.973714113235473633e+00 2.000000000000000000e+00 4.000000000000000000e+00 1.932144470214843750e+02 4.325000000000000000e+01 6.175000000000000000e+01
3.000000000000000000e+01 6.151692307692309214e+02 3.148902587890625000e+02 -5.910949707031250000e-01 0.000000000000000000e+00 0.000000000000000000e+00 2.028505737304687500e+03 1.957183599472045898e+00 5.000000000000000000e+00 3.000000000000000000e+00 1.648899383544921875e+02 4.375000000000000000e+01 6.175000000000000000e+01
4.300000000000000000e+01 6.264076923076922867e+02 3.084711303710937500e+02 -7.470703125000000000e-01 0.000000000000000000e+00 0.000000000000000000e+00 2.012437988281250000e+03 1.947728157043457031e+00 5.000000000000000000e+00 3.000000000000000000e+00 1.688666839599609375e+02 4.425000000000000000e+01 6.175000000000000000e+01
7.100000000000000000e+01 6.193923076923074404e+02 3.058782958984375000e+02 -9.030151367187500000e-01 0.000000000000000000e+00 5.882352963089942932e-02 1.996370239257812500e+03 1.948323011398315430e+00 5.000000000000000000e+00 4.000000000000000000e+00 1.617019348144531250e+02 4.475000000000000000e+01 6.175000000000000000e+01
6.000000000000000000e+00 6.032384615384615927e+02 3.090239257812500000e+02 -1.030548095703125000e+00 0.000000000000000000e+00 0.000000000000000000e+00 1.982262939453125000e+03 1.957811713218688965e+00 2.000000000000000000e+00 1.000000000000000000e+00 6.253197860717773438e+01 4.525000000000000000e+01 6.175000000000000000e+01
1.200000000000000000e+01 5.957461538461537884e+02 3.158010864257812500e+02 -1.129608154296875000e+00 0.000000000000000000e+00 0.000000000000000000e+00 1.970116210937500000e+03 1.964103579521179199e+00 2.000000000000000000e+00 1.000000000000000000e+00 6.941857910156250000e+01 4.575000000000000000e+01 6.175000000000000000e+01
7.000000000000000000e+01 5.936230769230767237e+02 3.275578918457031250e+02 -1.327789306640625000e+00 0.000000000000000000e+00 0.000000000000000000e+00 1.945822753906250000e+03 1.212462425231933594e+00 5.000000000000000000e+00 4.000000000000000000e+00 1.100945816040039062e+02 4.675000000000000000e+01 6.175000000000000000e+01
6.700000000000000000e+01 5.981230769230769511e+02 3.278492736816406250e+02 -1.381530761718750000e+00 0.000000000000000000e+00 0.000000000000000000e+00 1.939580200195312500e+03 1.951765894889831543e+00 5.000000000000000000e+00 4.000000000000000000e+00 1.900528259277343750e+02 4.725000000000000000e+01 6.175000000000000000e+01
6.700000000000000000e+01 5.889076923076924004e+02 3.243021240234375000e+02 -1.420196533203125000e+00 0.000000000000000000e+00 0.000000000000000000e+00 1.935305664062500000e+03 1.834238052368164062e+00 5.000000000000000000e+00 4.000000000000000000e+00 1.663586425781250000e+02 4.775000000000000000e+01 6.175000000000000000e+01
4.700000000000000000e+01 5.862153846153850054e+02 3.179436340332031250e+02 -1.458831787109375000e+00 0.000000000000000000e+00 0.000000000000000000e+00 1.931031127929687500e+03 1.496636629104614258e+00 2.000000000000000000e+00 4.000000000000000000e+00 9.653188323974609375e+01 4.825000000000000000e+01 6.175000000000000000e+01
6.600000000000000000e+01 6.077846153846155630e+02 3.140537719726562500e+02 -1.497497558593750000e+00 0.000000000000000000e+00 2.941176593303680420e-01 1.926756591796875000e+03 1.102442502975463867e+00 2.000000000000000000e+00 4.000000000000000000e+00 1.392250976562500000e+02 4.875000000000000000e+01 6.175000000000000000e+01
6.800000000000000000e+01 6.138307692307690786e+02 3.156381225585937500e+02 -1.510375976562500000e+00 0.000000000000000000e+00 0.000000000000000000e+00 1.923360839843750000e+03 1.888273239135742188e+00 5.000000000000000000e+00 4.000000000000000000e+00 1.462808837890625000e+02 4.925000000000000000e+01 6.175000000000000000e+01
7.300000000000000000e+01 6.143538461538458932e+02 3.254667663574218750e+02 -1.523254394531250000e+00 0.000000000000000000e+00 0.000000000000000000e+00 1.919965087890625000e+03 1.635947823524475098e+00 5.000000000000000000e+00 4.000000000000000000e+00 1.081151580810546875e+02 4.975000000000000000e+01 6.175000000000000000e+01
7.700000000000000000e+01 6.184230769230769056e+02 3.382539367675781250e+02 -1.536163330078125000e+00 0.000000000000000000e+00 0.000000000000000000e+00 1.916569335937500000e+03 1.964372396469116211e+00 5.000000000000000000e+00 4.000000000000000000e+00 1.407965393066406250e+02 5.025000000000000000e+01 6.175000000000000000e+01
6.100000000000000000e+01 6.198615384615385437e+02 3.484696655273437500e+02 -1.552917480468750000e+00 0.000000000000000000e+00 2.941176593303680420e-01 1.911881469726562500e+03 1.972755789756774902e+00 2.000000000000000000e+00 4.000000000000000000e+00 1.125551757812500000e+02 5.075000000000000000e+01 6.175000000000000000e+01
4.900000000000000000e+01 6.234000000000002046e+02 3.495912780761718750e+02 -1.609893798828125000e+00 0.000000000000000000e+00 0.000000000000000000e+00 1.894752685546875000e+03 1.960736513137817383e+00 2.000000000000000000e+00 4.000000000000000000e+00 9.647297668457031250e+01 5.175000000000000000e+01 6.175000000000000000e+01
5.900000000000000000e+01 6.280769230769230944e+02 3.453059997558593750e+02 -1.638397216796875000e+00 0.000000000000000000e+00 0.000000000000000000e+00 1.886188354492187500e+03 1.949035286903381348e+00 2.000000000000000000e+00 4.000000000000000000e+00 1.482196197509765625e+02 5.225000000000000000e+01 6.175000000000000000e+01
7.400000000000000000e+01 6.321538461538463025e+02 3.396557922363281250e+02 -1.700622558593750000e+00 9.999999776482582092e-03 0.000000000000000000e+00 1.874953857421875000e+03 1.160690307617187500e+00 2.000000000000000000e+00 4.000000000000000000e+00 1.891782073974609375e+02 5.275000000000000000e+01 6.175000000000000000e+01
7.100000000000000000e+01 6.313307692307691923e+02 3.357160339355468750e+02 -1.796630859375000000e+00 9.999999776482582092e-03 0.000000000000000000e+00 1.861049194335937500e+03 1.425036430358886719e+00 5.000000000000000000e+00 4.000000000000000000e+00 1.477739410400390625e+02 5.325000000000000000e+01 6.175000000000000000e+01
3.400000000000000000e+01 6.312230769230767464e+02 3.344254150390625000e+02 -1.892639160156250000e+00 9.999999776482582092e-03 0.000000000000000000e+00 1.847144531250000000e+03 8.097682595252990723e-01 5.000000000000000000e+00 3.000000000000000000e+00 1.593519134521484375e+02 5.375000000000000000e+01 6.175000000000000000e+01
6.300000000000000000e+01 6.340153846153846189e+02 3.361349487304687500e+02 -1.988647460937500000e+00 9.999999776482582092e-03 0.000000000000000000e+00 1.833239868164062500e+03 1.334566235542297363e+00 5.000000000000000000e+00 4.000000000000000000e+00 1.817287597656250000e+02 5.425000000000000000e+01 6.175000000000000000e+01
7.300000000000000000e+01 6.332538461538463253e+02 3.409159851074218750e+02 -2.126708984375000000e+00 9.999999776482582092e-03 0.000000000000000000e+00 1.817246948242187500e+03 1.441539406776428223e+00 5.000000000000000000e+00 4.000000000000000000e+00 1.456481170654296875e+02 5.475000000000000000e+01 6.175000000000000000e+01
4.400000000000000000e+01 6.398999999999998636e+02 3.508636169433593750e+02 -2.278747558593750000e+00 9.999999776482582092e-03 0.000000000000000000e+00 1.800557983398437500e+03 1.906776666641235352e+00 2.000000000000000000e+00 3.000000000000000000e+00 1.664138031005859375e+02 5.525000000000000000e+01 6.175000000000000000e+01
3.100000000000000000e+01 6.543461538461538112e+02 3.646660766601562500e+02 -2.430816650390625000e+00 9.999999776482582092e-03 0.000000000000000000e+00 1.783868896484375000e+03 1.899069547653198242e+00 2.000000000000000000e+00 3.000000000000000000e+00 1.612805938720703125e+02 5.575000000000000000e+01 6.175000000000000000e+01
5.300000000000000000e+01 6.624076923076920593e+02 3.794103698730468750e+02 -2.582855224609375000e+00 9.999999776482582092e-03 0.000000000000000000e+00 1.767179931640625000e+03 1.893826127052307129e+00 2.000000000000000000e+00 4.000000000000000000e+00 1.768046722412109375e+02 5.625000000000000000e+01 6.175000000000000000e+01
3.000000000000000000e+01 6.649076923076922867e+02 3.910411376953125000e+02 -2.742767333984375000e+00 9.999999776482582092e-03 0.000000000000000000e+00 1.748259277343750000e+03 1.891081213951110840e+00 2.000000000000000000e+00 3.000000000000000000e+00 1.727492218017578125e+02 5.675000000000000000e+01 6.175000000000000000e+01
5.900000000000000000e+01 6.542538461538462116e+02 3.842015991210937500e+02 -3.062561035156250000e+00 9.999999776482582092e-03 0.000000000000000000e+00 1.710417968750000000e+03 1.847828865051269531e+00 2.000000000000000000e+00 4.000000000000000000e+00 1.897879943847656250e+02 5.775000000000000000e+01 6.175000000000000000e+01
6.800000000000000000e+01 6.444846153846153811e+02 3.502670288085937500e+02 -3.204559326171875000e+00 1.068783327937126160e-01 2.941176593303680420e-01 1.694232055664062500e+03 1.796366810798645020e+00 1.300000000000000000e+01 4.000000000000000000e+00 3.030096130371093750e+02 5.825000000000000000e+01 6.175000000000000000e+01
6.500000000000000000e+01 6.369076923076925141e+02 3.023618164062500000e+02 -3.292755126953125000e+00 1.498012542724609375e-01 0.000000000000000000e+00 1.686250244140625000e+03 1.703636884689331055e+00 1.300000000000000000e+01 4.000000000000000000e+00 3.540555419921875000e+02 5.875000000000000000e+01 6.175000000000000000e+01
6.500000000000000000e+01 6.343769230769230489e+02 2.739601440429687500e+02 -3.380950927734375000e+00 3.166237771511077881e-01 0.000000000000000000e+00 1.678268310546875000e+03 1.584752082824707031e+00 1.300000000000000000e+01 4.000000000000000000e+00 6.906607666015625000e+02 5.925000000000000000e+01 6.175000000000000000e+01
7.500000000000000000e+01 5.967000000000000455e+02 2.608365173339843750e+02 -3.469146728515625000e+00 1.598049104213714600e-01 5.294117927551269531e-01 1.670286499023437500e+03 1.715794324874877930e+00 1.300000000000000000e+01 4.000000000000000000e+00 3.184959411621093750e+02 5.975000000000000000e+01 6.175000000000000000e+01
6.800000000000000000e+01 5.676923076923077360e+02 2.529264678955078125e+02 -3.475158691406250000e+00 1.168558150529861450e-01 5.294117927551269531e-01 1.677381713867187500e+03 1.806353330612182617e+00 1.300000000000000000e+01 4.000000000000000000e+00 2.204881134033203125e+02 6.025000000000000000e+01 6.175000000000000000e+01
5.900000000000000000e+01 5.536923076923078497e+02 2.499950714111328125e+02 -3.399017333984375000e+00 1.027795001864433289e-01 6.470588445663452148e-01 1.699554077148437500e+03 1.851503968238830566e+00 1.300000000000000000e+01 4.000000000000000000e+00 1.172758255004882812e+02 6.075000000000000000e+01 6.175000000000000000e+01
5.000000000000000000e+01 5.270076923076918547e+02 2.499191436767578125e+02 -3.246673583984375000e+00 9.999999776482582092e-03 5.294117927551269531e-01 1.743898803710937500e+03 1.877269387245178223e+00 2.000000000000000000e+00 4.000000000000000000e+00 6.070264434814453125e+01 6.175000000000000000e+01 6.175000000000000000e+01
5.700000000000000000e+01 5.227461538461540158e+02 2.521977691650390625e+02 -3.145172119140625000e+00 1.226279884576797485e-01 0.000000000000000000e+00 1.761570068359375000e+03 1.865316152572631836e+00 4.000000000000000000e+00 4.000000000000000000e+00 1.769053497314453125e+02 6.225000000000000000e+01 6.175000000000000000e+01
3.700000000000000000e+01 5.386153846153846416e+02 2.633270263671875000e+02 -2.925323486328125000e+00 1.306236386299133301e-01 5.882352963089942932e-02 1.793911621093750000e+03 1.844819903373718262e+00 2.000000000000000000e+00 3.000000000000000000e+00 1.487985229492187500e+02 6.325000000000000000e+01 6.175000000000000000e+01
1.500000000000000000e+01 5.481230769230769511e+02 2.718092041015625000e+02 -2.815368652343750000e+00 1.166330501437187195e-01 2.941176593303680420e-01 1.810082519531250000e+03 1.849778532981872559e+00 2.000000000000000000e+00 1.000000000000000000e+00 9.039559173583984375e+01 6.375000000000000000e+01 6.175000000000000000e+01
4.200000000000000000e+01 5.576538461538456204e+02 2.826989746093750000e+02 -2.735870361328125000e+00 1.409362554550170898e-01 2.941176593303680420e-01 1.822564697265625000e+03 1.852145910263061523e+00 2.000000000000000000e+00 3.000000000000000000e+00 1.382490692138671875e+02 6.425000000000000000e+01 6.175000000000000000e+01
4.100000000000000000e+01 5.682846153846152220e+02 2.972210998535156250e+02 -2.656341552734375000e+00 1.309328228235244751e-01 5.882353186607360840e-01 1.835046875000000000e+03 1.863322138786315918e+00 4.000000000000000000e+00 3.000000000000000000e+00 1.237652893066406250e+02 6.475000000000000000e+01 6.175000000000000000e+01
4.600000000000000000e+01 5.887384615384614790e+02 3.206764221191406250e+02 -2.524993896484375000e+00 1.413106769323348999e-01 0.000000000000000000e+00 1.856769653320312500e+03 1.861003160476684570e+00 4.000000000000000000e+00 4.000000000000000000e+00 9.256639099121093750e+01 6.625000000000000000e+01 6.175000000000000000e+01
2.900000000000000000e+01 5.758384615384615017e+02 3.245008544921875000e+02 -2.531250000000000000e+00 1.289969831705093384e-01 1.764705926179885864e-01 1.856672729492187500e+03 1.858985424041748047e+00 1.500000000000000000e+01 3.000000000000000000e+00 3.959322738647460938e+01 6.675000000000000000e+01 6.175000000000000000e+01
7.400000000000000000e+01 5.576692307692309214e+02 3.285056457519531250e+02 -2.586761474609375000e+00 1.619222611188888550e-01 2.941176593303680420e-01 1.851275268554687500e+03 1.853290677070617676e+00 5.000000000000000000e+00 4.000000000000000000e+00 8.316168212890625000e+01 6.775000000000000000e+01 6.175000000000000000e+01
6.000000000000000000e+01 6.470615384615382482e+02 3.677569274902343750e+02 -8.157348632812500000e-02 0.000000000000000000e+00 0.000000000000000000e+00 2.073571044921875000e+03 1.942060708999633789e+00 2.000000000000000000e+00 4.000000000000000000e+00 1.617260284423828125e+02 3.325000000000000000e+01 6.225000000000000000e+01
5.900000000000000000e+01 6.332307692307689422e+02 3.647549743652343750e+02 -2.816772460937500000e-02 0.000000000000000000e+00 0.000000000000000000e+00 2.073331054687500000e+03 1.942556738853454590e+00 2.000000000000000000e+00 4.000000000000000000e+00 9.139356994628906250e+01 3.375000000000000000e+01 6.225000000000000000e+01
3.200000000000000000e+01 6.416153846153845279e+02 4.057767944335937500e+02 6.054382324218750000e-01 0.000000000000000000e+00 0.000000000000000000e+00 2.105852294921875000e+03 1.971558094024658203e+00 5.000000000000000000e+00 3.000000000000000000e+00 1.317104339599609375e+02 3.625000000000000000e+01 6.225000000000000000e+01
5.400000000000000000e+01 6.675538461538463935e+02 3.841293029785156250e+02 4.219970703125000000e-01 0.000000000000000000e+00 0.000000000000000000e+00 2.090343750000000000e+03 1.968023777008056641e+00 2.000000000000000000e+00 4.000000000000000000e+00 1.200857315063476562e+02 3.825000000000000000e+01 6.225000000000000000e+01
3.800000000000000000e+01 6.893384615384616154e+02 3.801296081542968750e+02 3.829345703125000000e-01 0.000000000000000000e+00 5.294117927551269531e-01 2.088858886718750000e+03 1.955463290214538574e+00 5.000000000000000000e+00 3.000000000000000000e+00 1.796975708007812500e+02 3.875000000000000000e+01 6.225000000000000000e+01
3.600000000000000000e+01 6.902615384615381799e+02 3.822161254882812500e+02 3.439025878906250000e-01 0.000000000000000000e+00 0.000000000000000000e+00 2.087374267578125000e+03 1.946203351020812988e+00 5.000000000000000000e+00 3.000000000000000000e+00 1.519216308593750000e+02 3.925000000000000000e+01 6.225000000000000000e+01
6.800000000000000000e+01 6.718076923076921503e+02 3.975497436523437500e+02 1.614074707031250000e-01 0.000000000000000000e+00 0.000000000000000000e+00 2.069209472656250000e+03 1.939474344253540039e+00 5.000000000000000000e+00 4.000000000000000000e+00 7.556872558593750000e+01 4.025000000000000000e+01 6.225000000000000000e+01
6.900000000000000000e+01 6.665538461538465071e+02 3.914518737792968750e+02 6.268310546875000000e-02 0.000000000000000000e+00 0.000000000000000000e+00 2.059041748046875000e+03 1.930770516395568848e+00 5.000000000000000000e+00 4.000000000000000000e+00 1.254225082397460938e+02 4.075000000000000000e+01 6.225000000000000000e+01
5.300000000000000000e+01 6.778615384615386574e+02 3.694555664062500000e+02 -3.601074218750000000e-02 0.000000000000000000e+00 1.176470592617988586e-01 2.048873779296875000e+03 1.925052165985107422e+00 5.000000000000000000e+00 4.000000000000000000e+00 2.001359100341796875e+02 4.125000000000000000e+01 6.225000000000000000e+01
6.900000000000000000e+01 6.567846153846154493e+02 3.458646545410156250e+02 -1.932678222656250000e-01 0.000000000000000000e+00 5.882352963089942932e-02 2.032517578125000000e+03 1.930821299552917480e+00 5.000000000000000000e+00 4.000000000000000000e+00 1.792440795898437500e+02 4.175000000000000000e+01 6.225000000000000000e+01
3.700000000000000000e+01 6.037615384615389758e+02 3.283346862792968750e+02 -3.505249023437500000e-01 0.000000000000000000e+00 5.882353186607360840e-01 2.016161376953125000e+03 1.954893708229064941e+00 5.000000000000000000e+00 3.000000000000000000e+00 8.949149322509765625e+01 4.225000000000000000e+01 6.225000000000000000e+01
5.300000000000000000e+01 5.724000000000000909e+02 3.197790832519531250e+02 -5.077819824218750000e-01 0.000000000000000000e+00 0.000000000000000000e+00 1.999805053710937500e+03 1.970580935478210449e+00 2.000000000000000000e+00 4.000000000000000000e+00 6.007743072509765625e+01 4.275000000000000000e+01 6.225000000000000000e+01
4.200000000000000000e+01 5.716615384615383846e+02 3.083448486328125000e+02 -8.403930664062500000e-01 0.000000000000000000e+00 0.000000000000000000e+00 1.967010253906250000e+03 1.953114032745361328e+00 2.000000000000000000e+00 3.000000000000000000e+00 5.059555435180664062e+01 4.375000000000000000e+01 6.225000000000000000e+01
2.300000000000000000e+01 6.135384615384613198e+02 2.980816650390625000e+02 -1.012115478515625000e+00 0.000000000000000000e+00 0.000000000000000000e+00 1.950588256835937500e+03 1.928597450256347656e+00 2.000000000000000000e+00 3.000000000000000000e+00 5.292722702026367188e+01 4.425000000000000000e+01 6.225000000000000000e+01
8.000000000000000000e+00 6.111000000000001364e+02 2.915782165527343750e+02 -1.183837890625000000e+00 0.000000000000000000e+00 1.764705926179885864e-01 1.934166137695312500e+03 1.429810166358947754e+00 2.000000000000000000e+00 1.000000000000000000e+00 5.911923599243164062e+01 4.475000000000000000e+01 6.225000000000000000e+01
7.200000000000000000e+01 5.960615384615383618e+02 2.910888366699218750e+02 -1.325714111328125000e+00 0.000000000000000000e+00 2.941176593303680420e-01 1.919815063476562500e+03 9.008602499961853027e-01 5.000000000000000000e+00 4.000000000000000000e+00 1.290242614746093750e+02 4.525000000000000000e+01 6.225000000000000000e+01
3.700000000000000000e+01 6.027461538461536747e+02 2.971000366210937500e+02 -1.437744140625000000e+00 0.000000000000000000e+00 5.882352963089942932e-02 1.907535034179687500e+03 1.535701036453247070e+00 5.000000000000000000e+00 3.000000000000000000e+00 1.952781066894531250e+02 4.575000000000000000e+01 6.225000000000000000e+01
7.700000000000000000e+01 6.062000000000000455e+02 3.048534545898437500e+02 -1.549743652343750000e+00 9.999999776482582092e-03 0.000000000000000000e+00 1.895254882812500000e+03 8.414196968078613281e-01 5.000000000000000000e+00 4.000000000000000000e+00 1.990238647460937500e+02 4.625000000000000000e+01 6.225000000000000000e+01
6.200000000000000000e+01 6.079307692307694424e+02 3.093853454589843750e+02 -1.661773681640625000e+00 0.000000000000000000e+00 5.294117927551269531e-01 1.882974853515625000e+03 1.783691167831420898e+00 5.000000000000000000e+00 4.000000000000000000e+00 1.774440002441406250e+02 4.675000000000000000e+01 6.225000000000000000e+01
7.000000000000000000e+01 5.954307692307691013e+02 3.099036560058593750e+02 -1.724822998046875000e+00 9.999999776482582092e-03 5.294117927551269531e-01 1.876322631835937500e+03 1.476748943328857422e+00 5.000000000000000000e+00 4.000000000000000000e+00 2.041660308837890625e+02 4.725000000000000000e+01 6.225000000000000000e+01
6.500000000000000000e+01 5.898923076923080089e+02 3.074521484375000000e+02 -1.771575927734375000e+00 0.000000000000000000e+00 5.294117927551269531e-01 1.871546264648437500e+03 1.910423874855041504e+00 5.000000000000000000e+00 4.000000000000000000e+00 1.755663604736328125e+02 4.775000000000000000e+01 6.225000000000000000e+01
3.300000000000000000e+01 5.895769230769230944e+02 3.038524780273437500e+02 -1.818328857421875000e+00 9.999999776482582092e-03 0.000000000000000000e+00 1.866770019531250000e+03 1.910466909408569336e+00 5.000000000000000000e+00 3.000000000000000000e+00 1.906344299316406250e+02 4.825000000000000000e+01 6.225000000000000000e+01
4.700000000000000000e+01 5.969461538461539476e+02 3.016540527343750000e+02 -1.865081787109375000e+00 0.000000000000000000e+00 0.000000000000000000e+00 1.861993652343750000e+03 1.914101600646972656e+00 2.000000000000000000e+00 4.000000000000000000e+00 1.455063171386718750e+02 4.875000000000000000e+01 6.225000000000000000e+01
7.700000000000000000e+01 6.044692307692305349e+02 3.040534667968750000e+02 -1.875427246093750000e+00 0.000000000000000000e+00 5.294117927551269531e-01 1.858798828125000000e+03 1.918216347694396973e+00 2.000000000000000000e+00 4.000000000000000000e+00 1.328924865722656250e+02 4.925000000000000000e+01 6.225000000000000000e+01
9.000000000000000000e+00 6.117384615384614790e+02 3.141856994628906250e+02 -1.885803222656250000e+00 9.999999776482582092e-03 0.000000000000000000e+00 1.855604003906250000e+03 1.925813317298889160e+00 5.000000000000000000e+00 1.000000000000000000e+00 1.438025665283203125e+02 4.975000000000000000e+01 6.225000000000000000e+01
6.500000000000000000e+01 6.067692307692308304e+02 3.298284912109375000e+02 -1.896179199218750000e+00 0.000000000000000000e+00 0.000000000000000000e+00 1.852409179687500000e+03 1.933465719223022461e+00 5.000000000000000000e+00 4.000000000000000000e+00 1.100009384155273438e+02 5.025000000000000000e+01 6.225000000000000000e+01
4.900000000000000000e+01 6.132538461538460979e+02 3.429587402343750000e+02 -1.907897949218750000e+00 9.999999776482582092e-03 0.000000000000000000e+00 1.848150390625000000e+03 1.935603618621826172e+00 2.000000000000000000e+00 4.000000000000000000e+00 1.492466583251953125e+02 5.075000000000000000e+01 6.225000000000000000e+01
6.800000000000000000e+01 6.207923076923075314e+02 3.481840209960937500e+02 -1.923614501953125000e+00 9.999999776482582092e-03 0.000000000000000000e+00 1.840699584960937500e+03 1.927502155303955078e+00 2.000000000000000000e+00 4.000000000000000000e+00 1.655313110351562500e+02 5.125000000000000000e+01 6.225000000000000000e+01
4.500000000000000000e+01 6.276076923076923322e+02 3.477858276367187500e+02 -1.939300537109375000e+00 9.999999776482582092e-03 0.000000000000000000e+00 1.833248901367187500e+03 1.919472098350524902e+00 2.000000000000000000e+00 4.000000000000000000e+00 1.511206054687500000e+02 5.175000000000000000e+01 6.225000000000000000e+01
6.500000000000000000e+01 6.310153846153845052e+02 3.440657653808593750e+02 -1.955017089843750000e+00 9.999999776482582092e-03 0.000000000000000000e+00 1.825798217773437500e+03 1.915380001068115234e+00 2.000000000000000000e+00 4.000000000000000000e+00 1.257506561279296875e+02 5.225000000000000000e+01 6.225000000000000000e+01
5.400000000000000000e+01 6.376769230769227761e+02 3.393351440429687500e+02 -2.002319335937500000e+00 9.999999776482582092e-03 0.000000000000000000e+00 1.815882812500000000e+03 1.904525518417358398e+00 5.000000000000000000e+00 4.000000000000000000e+00 1.097173385620117188e+02 5.275000000000000000e+01 6.225000000000000000e+01
5.500000000000000000e+01 6.402615384615382936e+02 3.339890747070312500e+02 -2.081146240234375000e+00 9.999999776482582092e-03 0.000000000000000000e+00 1.803502685546875000e+03 1.889312028884887695e+00 2.000000000000000000e+00 4.000000000000000000e+00 1.819893798828125000e+02 5.325000000000000000e+01 6.225000000000000000e+01
5.500000000000000000e+01 6.380076923076921958e+02 3.311177368164062500e+02 -2.160003662109375000e+00 9.999999776482582092e-03 0.000000000000000000e+00 1.791122558593750000e+03 1.880985260009765625e+00 5.000000000000000000e+00 4.000000000000000000e+00 1.507764739990234375e+02 5.375000000000000000e+01 6.225000000000000000e+01
3.400000000000000000e+01 6.349307692307696698e+02 3.303395996093750000e+02 -2.238861083984375000e+00 9.999999776482582092e-03 0.000000000000000000e+00 1.778742431640625000e+03 1.881719350814819336e+00 2.000000000000000000e+00 3.000000000000000000e+00 1.470805969238281250e+02 5.425000000000000000e+01 6.225000000000000000e+01
4.400000000000000000e+01 6.315461538461539703e+02 3.340025329589843750e+02 -2.363494873046875000e+00 9.999999776482582092e-03 0.000000000000000000e+00 1.763449951171875000e+03 1.876965880393981934e+00 2.000000000000000000e+00 3.000000000000000000e+00 1.544296417236328125e+02 5.475000000000000000e+01 6.225000000000000000e+01
4.800000000000000000e+01 6.315846153846155175e+02 3.414169311523437500e+02 -2.503387451171875000e+00 9.999999776482582092e-03 0.000000000000000000e+00 1.747186645507812500e+03 1.867489457130432129e+00 2.000000000000000000e+00 4.000000000000000000e+00 1.850373535156250000e+02 5.525000000000000000e+01 6.225000000000000000e+01
5.100000000000000000e+01 6.323769230769228216e+02 3.497043762207031250e+02 -2.643249511718750000e+00 9.999999776482582092e-03 0.000000000000000000e+00 1.730923339843750000e+03 1.864701032638549805e+00 2.000000000000000000e+00 4.000000000000000000e+00 1.597235412597656250e+02 5.575000000000000000e+01 6.225000000000000000e+01
6.300000000000000000e+01 6.423615384615380890e+02 3.620228271484375000e+02 -2.947540283203125000e+00 9.999999776482582092e-03 2.352941185235977173e-01 1.695535766601562500e+03 1.868446350097656250e+00 2.000000000000000000e+00 4.000000000000000000e+00 1.380506896972656250e+02 5.675000000000000000e+01 6.225000000000000000e+01
3.100000000000000000e+01 6.395615384615382482e+02 3.615094604492187500e+02 -3.111938476562500000e+00 9.999999776482582092e-03 0.000000000000000000e+00 1.676411621093750000e+03 1.848791003227233887e+00 2.000000000000000000e+00 3.000000000000000000e+00 1.582922821044921875e+02 5.725000000000000000e+01 6.225000000000000000e+01
4.400000000000000000e+01 6.423307692307694197e+02 3.493145446777343750e+02 -3.276336669921875000e+00 1.269590109586715698e-01 0.000000000000000000e+00 1.657287353515625000e+03 1.813349962234497070e+00 2.000000000000000000e+00 3.000000000000000000e+00 2.617679443359375000e+02 5.775000000000000000e+01 6.225000000000000000e+01
6.000000000000000000e+01 6.331384615384615699e+02 3.185321960449218750e+02 -3.429779052734375000e+00 1.557618230581283569e-01 0.000000000000000000e+00 1.639683837890625000e+03 1.771849513053894043e+00 2.000000000000000000e+00 4.000000000000000000e+00 3.378645019531250000e+02 5.825000000000000000e+01 6.225000000000000000e+01
7.500000000000000000e+01 6.211923076923075087e+02 2.755385742187500000e+02 -3.550231933593750000e+00 2.267727851867675781e-01 0.000000000000000000e+00 1.626642089843750000e+03 1.715318679809570312e+00 2.000000000000000000e+00 4.000000000000000000e+00 3.587692260742187500e+02 5.875000000000000000e+01 6.225000000000000000e+01
7.100000000000000000e+01 6.175153846153846189e+02 2.453992309570312500e+02 -3.670715332031250000e+00 2.954954206943511963e-01 0.000000000000000000e+00 1.613600463867187500e+03 1.674687147140502930e+00 1.300000000000000000e+01 4.000000000000000000e+00 4.105390319824218750e+02 5.925000000000000000e+01 6.225000000000000000e+01
5.900000000000000000e+01 5.935769230769228670e+02 2.319324188232421875e+02 -3.791198730468750000e+00 2.161812335252761841e-01 0.000000000000000000e+00 1.600558837890625000e+03 1.705524444580078125e+00 1.300000000000000000e+01 4.000000000000000000e+00 2.885428771972656250e+02 5.975000000000000000e+01 6.225000000000000000e+01
4.100000000000000000e+01 5.642307692307696243e+02 2.240616302490234375e+02 -3.829315185546875000e+00 1.351821273565292358e-01 5.294117927551269531e-01 1.604696655273437500e+03 1.772423148155212402e+00 1.300000000000000000e+01 3.000000000000000000e+00 1.230054473876953125e+02 6.025000000000000000e+01 6.225000000000000000e+01
1.600000000000000000e+01 5.508153846153844597e+02 2.201849822998046875e+02 -3.785095214843750000e+00 1.112121641635894775e-01 0.000000000000000000e+00 1.626014160156250000e+03 1.808364272117614746e+00 4.000000000000000000e+00 1.000000000000000000e+00 4.918825912475585938e+01 6.075000000000000000e+01 6.225000000000000000e+01
4.500000000000000000e+01 5.349153846153845961e+02 2.234730529785156250e+02 -3.740875244140625000e+00 1.250804662704467773e-01 2.352941185235977173e-01 1.647331542968750000e+03 1.814845561981201172e+00 4.000000000000000000e+00 4.000000000000000000e+00 6.354407882690429688e+01 6.125000000000000000e+01 6.225000000000000000e+01
2.800000000000000000e+01 5.300538461538459387e+02 2.301327667236328125e+02 -3.696624755859375000e+00 1.180579513311386108e-01 0.000000000000000000e+00 1.668648925781250000e+03 1.822069644927978516e+00 2.000000000000000000e+00 3.000000000000000000e+00 4.548217010498046875e+01 6.175000000000000000e+01 6.225000000000000000e+01
6.300000000000000000e+01 5.285000000000000000e+02 2.383910675048828125e+02 -3.627044677734375000e+00 1.346870064735412598e-01 0.000000000000000000e+00 1.684412597656250000e+03 1.818493008613586426e+00 4.000000000000000000e+00 4.000000000000000000e+00 8.761732482910156250e+01 6.225000000000000000e+01 6.225000000000000000e+01
5.300000000000000000e+01 5.265384615384616609e+02 2.496691131591796875e+02 -3.548980712890625000e+00 1.451729387044906616e-01 2.941176593303680420e-01 1.698325073242187500e+03 1.815995335578918457e+00 4.000000000000000000e+00 4.000000000000000000e+00 1.249301147460937500e+02 6.275000000000000000e+01 6.225000000000000000e+01
5.700000000000000000e+01 5.304461538461537202e+02 2.628420715332031250e+02 -3.470947265625000000e+00 1.602187454700469971e-01 0.000000000000000000e+00 1.712237548828125000e+03 1.816218733787536621e+00 2.000000000000000000e+00 4.000000000000000000e+00 1.255855255126953125e+02 6.325000000000000000e+01 6.225000000000000000e+01
7.200000000000000000e+01 5.424076923076921730e+02 2.796485290527343750e+02 -3.392913818359375000e+00 1.775770038366317749e-01 2.352941185235977173e-01 1.726150024414062500e+03 1.822883009910583496e+00 2.000000000000000000e+00 4.000000000000000000e+00 1.224117355346679688e+02 6.375000000000000000e+01 6.225000000000000000e+01
3.000000000000000000e+01 5.505076923076923094e+02 2.970722656250000000e+02 -3.318023681640625000e+00 1.354231536388397217e-01 2.941176593303680420e-01 1.738429443359375000e+03 1.821648359298706055e+00 3.000000000000000000e+00 3.000000000000000000e+00 5.236119842529296875e+01 6.425000000000000000e+01 6.225000000000000000e+01
2.800000000000000000e+01 5.635307692307694651e+02 3.145877685546875000e+02 -3.243164062500000000e+00 1.844666600227355957e-01 0.000000000000000000e+00 1.750708862304687500e+03 1.824471712112426758e+00 3.000000000000000000e+00 3.000000000000000000e+00 1.424671783447265625e+02 6.475000000000000000e+01 6.225000000000000000e+01
4.900000000000000000e+01 5.754076923076921730e+02 3.273892211914062500e+02 -3.168304443359375000e+00 1.765685528516769409e-01 5.882353186607360840e-01 1.762988281250000000e+03 1.819088220596313477e+00 2.000000000000000000e+00 4.000000000000000000e+00 8.651171112060546875e+01 6.525000000000000000e+01 6.225000000000000000e+01
7.400000000000000000e+01 5.781461538461539931e+02 3.383049316406250000e+02 -3.080139160156250000e+00 2.087302207946777344e-01 0.000000000000000000e+00 1.777265258789062500e+03 1.762104153633117676e+00 5.000000000000000000e+00 4.000000000000000000e+00 7.112742614746093750e+01 6.675000000000000000e+01 6.225000000000000000e+01
5.000000000000000000e+01 5.718076923076922640e+02 3.370741271972656250e+02 -3.065887451171875000e+00 1.863826662302017212e-01 0.000000000000000000e+00 1.779517456054687500e+03 1.796604037284851074e+00 4.000000000000000000e+00 4.000000000000000000e+00 8.829670715332031250e+01 6.725000000000000000e+01 6.225000000000000000e+01
5.200000000000000000e+01 5.567076923076922412e+02 3.353271484375000000e+02 -3.086334228515625000e+00 1.752855479717254639e-01 1.176470637321472168e+00 1.777422119140625000e+03 1.825192213058471680e+00 4.000000000000000000e+00 4.000000000000000000e+00 7.234120178222656250e+01 6.775000000000000000e+01 6.225000000000000000e+01
5.600000000000000000e+01 6.122461538461540158e+02 3.861101684570312500e+02 -2.662963867187500000e-01 0.000000000000000000e+00 0.000000000000000000e+00 2.016063476562500000e+03 1.908288717269897461e+00 2.000000000000000000e+00 4.000000000000000000e+00 1.575982513427734375e+02 3.325000000000000000e+01 6.275000000000000000e+01
5.700000000000000000e+01 6.120307692307692378e+02 3.942113952636718750e+02 -2.207641601562500000e-01 0.000000000000000000e+00 0.000000000000000000e+00 2.015160522460937500e+03 1.909479379653930664e+00 2.000000000000000000e+00 4.000000000000000000e+00 1.584152221679687500e+02 3.375000000000000000e+01 6.275000000000000000e+01
5.200000000000000000e+01 6.180153846153848463e+02 4.020762023925781250e+02 -5.990600585937500000e-02 0.000000000000000000e+00 0.000000000000000000e+00 2.023592895507812500e+03 1.912419438362121582e+00 2.000000000000000000e+00 4.000000000000000000e+00 8.928922271728515625e+01 3.425000000000000000e+01 6.275000000000000000e+01
1.300000000000000000e+01 6.318538461538460069e+02 3.873751220703125000e+02 4.057006835937500000e-01 0.000000000000000000e+00 0.000000000000000000e+00 2.046765991210937500e+03 1.924288272857666016e+00 2.000000000000000000e+00 1.000000000000000000e+00 1.312827453613281250e+02 3.625000000000000000e+01 6.275000000000000000e+01
3.000000000000000000e+01 6.548153846153846871e+02 3.838945007324218750e+02 4.242553710937500000e-01 0.000000000000000000e+00 0.000000000000000000e+00 2.046753051757812500e+03 1.923365712165832520e+00 2.000000000000000000e+00 3.000000000000000000e+00 1.592359619140625000e+02 3.675000000000000000e+01 6.275000000000000000e+01
1.700000000000000000e+01 6.818230769230771102e+02 3.701925354003906250e+02 4.168395996093750000e-01 0.000000000000000000e+00 0.000000000000000000e+00 2.043772827148437500e+03 1.937205672264099121e+00 2.000000000000000000e+00 1.000000000000000000e+00 2.065897674560546875e+02 3.775000000000000000e+01 6.275000000000000000e+01
5.000000000000000000e+01 6.827000000000002728e+02 3.608699645996093750e+02 2.758178710937500000e-01 0.000000000000000000e+00 0.000000000000000000e+00 2.031930053710937500e+03 1.934137701988220215e+00 2.000000000000000000e+00 4.000000000000000000e+00 1.680059509277343750e+02 3.875000000000000000e+01 6.275000000000000000e+01
2.300000000000000000e+01 7.056000000000003638e+02 3.623793640136718750e+02 2.052917480468750000e-01 0.000000000000000000e+00 0.000000000000000000e+00 2.026008666992187500e+03 1.923913002014160156e+00 5.000000000000000000e+00 3.000000000000000000e+00 1.339162139892578125e+02 3.925000000000000000e+01 6.275000000000000000e+01
7.000000000000000000e+01 6.814153846153845961e+02 3.637191772460937500e+02 -2.227783203125000000e-03 0.000000000000000000e+00 0.000000000000000000e+00 2.007445922851562500e+03 1.919189214706420898e+00 5.000000000000000000e+00 4.000000000000000000e+00 1.158075561523437500e+02 4.025000000000000000e+01 6.275000000000000000e+01
6.000000000000000000e+01 6.631307692307696016e+02 3.548981018066406250e+02 -1.107177734375000000e-01 0.000000000000000000e+00 0.000000000000000000e+00 1.997684570312500000e+03 1.922247052192687988e+00 5.000000000000000000e+00 4.000000000000000000e+00 1.384342651367187500e+02 4.075000000000000000e+01 6.275000000000000000e+01
7.100000000000000000e+01 6.359692307692305349e+02 3.387519836425781250e+02 -2.192077636718750000e-01 0.000000000000000000e+00 5.882352963089942932e-02 1.987923217773437500e+03 1.927937746047973633e+00 5.000000000000000000e+00 4.000000000000000000e+00 8.302111053466796875e+01 4.125000000000000000e+01 6.275000000000000000e+01
5.800000000000000000e+01 6.149999999999997726e+02 3.195246582031250000e+02 -3.925781250000000000e-01 0.000000000000000000e+00 2.941176593303680420e-01 1.970732788085937500e+03 1.935409545898437500e+00 5.000000000000000000e+00 4.000000000000000000e+00 7.300117492675781250e+01 4.175000000000000000e+01 6.275000000000000000e+01
4.600000000000000000e+01 5.926923076923075087e+02 3.063672790527343750e+02 -5.659484863281250000e-01 0.000000000000000000e+00 0.000000000000000000e+00 1.953542358398437500e+03 1.943217039108276367e+00 5.000000000000000000e+00 4.000000000000000000e+00 7.461696624755859375e+01 4.225000000000000000e+01 6.275000000000000000e+01
5.100000000000000000e+01 5.877769230769230262e+02 2.986873474121093750e+02 -7.392883300781250000e-01 0.000000000000000000e+00 5.882352963089942932e-02 1.936351928710937500e+03 1.945947885513305664e+00 2.000000000000000000e+00 4.000000000000000000e+00 1.357527828216552734e+01 4.275000000000000000e+01 6.275000000000000000e+01
3.400000000000000000e+01 5.800769230769227534e+02 2.957303161621093750e+02 -9.152832031250000000e-01 0.000000000000000000e+00 0.000000000000000000e+00 1.919487304687500000e+03 1.941822290420532227e+00 2.000000000000000000e+00 3.000000000000000000e+00 2.233367919921875000e+01 4.325000000000000000e+01 6.275000000000000000e+01
6.100000000000000000e+01 5.805230769230770420e+02 2.915469055175781250e+02 -1.099212646484375000e+00 0.000000000000000000e+00 2.352941185235977173e-01 1.903600097656250000e+03 1.920803904533386230e+00 2.000000000000000000e+00 4.000000000000000000e+00 1.188426666259765625e+02 4.375000000000000000e+01 6.275000000000000000e+01
4.800000000000000000e+01 5.970384615384613198e+02 2.883317565917968750e+02 -1.283142089843750000e+00 0.000000000000000000e+00 5.882352963089942932e-02 1.887713012695312500e+03 1.896362185478210449e+00 2.000000000000000000e+00 4.000000000000000000e+00 1.912855529785156250e+02 4.425000000000000000e+01 6.275000000000000000e+01
5.600000000000000000e+01 5.981999999999999318e+02 2.865191345214843750e+02 -1.467071533203125000e+00 0.000000000000000000e+00 2.352941185235977173e-01 1.871825805664062500e+03 1.869438290596008301e+00 2.000000000000000000e+00 4.000000000000000000e+00 1.822561492919921875e+02 4.475000000000000000e+01 6.275000000000000000e+01
6.800000000000000000e+01 5.995538461538461661e+02 2.877949218750000000e+02 -1.620758056640625000e+00 9.999999776482582092e-03 0.000000000000000000e+00 1.858027343750000000e+03 1.868347883224487305e+00 5.000000000000000000e+00 4.000000000000000000e+00 1.776555786132812500e+02 4.525000000000000000e+01 6.275000000000000000e+01
5.600000000000000000e+01 5.984076923076922867e+02 2.923556823730468750e+02 -1.744171142578125000e+00 0.000000000000000000e+00 0.000000000000000000e+00 1.846317504882812500e+03 1.880968928337097168e+00 5.000000000000000000e+00 4.000000000000000000e+00 1.681510620117187500e+02 4.575000000000000000e+01 6.275000000000000000e+01
6.800000000000000000e+01 5.955153846153846189e+02 2.978488159179687500e+02 -1.867584228515625000e+00 0.000000000000000000e+00 5.882352963089942932e-02 1.834607666015625000e+03 1.879881501197814941e+00 5.000000000000000000e+00 4.000000000000000000e+00 1.309865417480468750e+02 4.625000000000000000e+01 6.275000000000000000e+01
6.800000000000000000e+01 6.003769230769231626e+02 3.003655700683593750e+02 -1.990997314453125000e+00 0.000000000000000000e+00 5.294117927551269531e-01 1.822897949218750000e+03 1.879718303680419922e+00 2.000000000000000000e+00 4.000000000000000000e+00 1.396481170654296875e+02 4.675000000000000000e+01 6.275000000000000000e+01
5.900000000000000000e+01 5.943384615384618428e+02 3.001093139648437500e+02 -2.062530517578125000e+00 9.999999776482582092e-03 2.941176593303680420e-01 1.816137451171875000e+03 1.876675248146057129e+00 2.000000000000000000e+00 4.000000000000000000e+00 1.809440460205078125e+02 4.725000000000000000e+01 6.275000000000000000e+01
7.000000000000000000e+01 5.818461538461541522e+02 2.996245727539062500e+02 -2.116729736328125000e+00 9.999999776482582092e-03 5.882352963089942932e-02 1.811026733398437500e+03 1.872222781181335449e+00 5.000000000000000000e+00 4.000000000000000000e+00 1.470800933837890625e+02 4.775000000000000000e+01 6.275000000000000000e+01
5.300000000000000000e+01 5.845384615384616609e+02 3.018683776855468750e+02 -2.170959472656250000e+00 9.999999776482582092e-03 5.882353186607360840e-01 1.805916015625000000e+03 1.870385885238647461e+00 5.000000000000000000e+00 4.000000000000000000e+00 2.103976898193359375e+02 4.825000000000000000e+01 6.275000000000000000e+01
5.200000000000000000e+01 5.958538461538460069e+02 3.054268188476562500e+02 -2.225189208984375000e+00 9.999999776482582092e-03 6.470588445663452148e-01 1.800805297851562500e+03 1.870023369789123535e+00 5.000000000000000000e+00 4.000000000000000000e+00 1.958806304931640625e+02 4.875000000000000000e+01 6.275000000000000000e+01
3.900000000000000000e+01 6.027307692307690559e+02 3.110942077636718750e+02 -2.230834960937500000e+00 9.999999776482582092e-03 5.882352963089942932e-02 1.798092285156250000e+03 1.871894478797912598e+00 5.000000000000000000e+00 3.000000000000000000e+00 1.841329193115234375e+02 4.925000000000000000e+01 6.275000000000000000e+01
6.200000000000000000e+01 6.011769230769228898e+02 3.184514160156250000e+02 -2.236450195312500000e+00 9.999999776482582092e-03 5.882352963089942932e-02 1.795379272460937500e+03 1.880226373672485352e+00 5.000000000000000000e+00 4.000000000000000000e+00 2.086274566650390625e+02 4.975000000000000000e+01 6.275000000000000000e+01
6.700000000000000000e+01 5.994999999999998863e+02 3.289243164062500000e+02 -2.242095947265625000e+00 9.999999776482582092e-03 0.000000000000000000e+00 1.792666259765625000e+03 1.891232609748840332e+00 5.000000000000000000e+00 4.000000000000000000e+00 1.441325836181640625e+02 5.025000000000000000e+01 6.275000000000000000e+01
2.200000000000000000e+01 6.072999999999997272e+02 3.367771606445312500e+02 -2.246490478515625000e+00 9.999999776482582092e-03 0.000000000000000000e+00 1.789114624023437500e+03 1.895653009414672852e+00 2.000000000000000000e+00 3.000000000000000000e+00 1.290961151123046875e+02 5.075000000000000000e+01 6.275000000000000000e+01
4.000000000000000000e+01 6.156769230769230035e+02 3.411504211425781250e+02 -2.247100830078125000e+00 9.999999776482582092e-03 0.000000000000000000e+00 1.783046875000000000e+03 1.892061352729797363e+00 2.000000000000000000e+00 3.000000000000000000e+00 1.377403411865234375e+02 5.125000000000000000e+01 6.275000000000000000e+01
3.500000000000000000e+01 6.189846153846154948e+02 3.420868835449218750e+02 -2.247741699218750000e+00 9.999999776482582092e-03 0.000000000000000000e+00 1.776979125976562500e+03 1.885334610939025879e+00 2.000000000000000000e+00 3.000000000000000000e+00 1.584064788818359375e+02 5.175000000000000000e+01 6.275000000000000000e+01
1.000000000000000000e+01 6.300692307692305576e+02 3.408318176269531250e+02 -2.248352050781250000e+00 9.999999776482582092e-03 0.000000000000000000e+00 1.770911499023437500e+03 1.878376364707946777e+00 2.000000000000000000e+00 1.000000000000000000e+00 1.406730346679687500e+02 5.225000000000000000e+01 6.275000000000000000e+01
9.000000000000000000e+00 6.329307692307691013e+02 3.368733825683593750e+02 -2.278320312500000000e+00 9.999999776482582092e-03 0.000000000000000000e+00 1.762489746093750000e+03 1.870095491409301758e+00 2.000000000000000000e+00 1.000000000000000000e+00 1.492418670654296875e+02 5.275000000000000000e+01 6.275000000000000000e+01
3.800000000000000000e+01 6.413384615384612744e+02 3.323533020019531250e+02 -2.337646484375000000e+00 9.999999776482582092e-03 0.000000000000000000e+00 1.751713989257812500e+03 1.855743646621704102e+00 2.000000000000000000e+00 3.000000000000000000e+00 2.408155212402343750e+02 5.325000000000000000e+01 6.275000000000000000e+01
3.400000000000000000e+01 6.400461538461538566e+02 3.308137817382812500e+02 -2.396972656250000000e+00 9.999999776482582092e-03 2.352941185235977173e-01 1.740938110351562500e+03 1.850217103958129883e+00 2.000000000000000000e+00 3.000000000000000000e+00 2.148646545410156250e+02 5.375000000000000000e+01 6.275000000000000000e+01
9.000000000000000000e+00 6.327384615384614790e+02 3.329455261230468750e+02 -2.456298828125000000e+00 9.999999776482582092e-03 0.000000000000000000e+00 1.730162353515625000e+03 1.854195356369018555e+00 2.000000000000000000e+00 1.000000000000000000e+00 1.969996490478515625e+02 5.425000000000000000e+01 6.275000000000000000e+01
3.000000000000000000e+01 6.312692307692307168e+02 3.387340087890625000e+02 -2.568511962890625000e+00 9.999999776482582092e-03 0.000000000000000000e+00 1.715299316406250000e+03 1.840532898902893066e+00 2.000000000000000000e+00 3.000000000000000000e+00 1.989784698486328125e+02 5.475000000000000000e+01 6.275000000000000000e+01
6.100000000000000000e+01 6.363846153846152447e+02 3.459852294921875000e+02 -2.698333740234375000e+00 1.167259737849235535e-01 2.352941185235977173e-01 1.699073730468750000e+03 1.822014689445495605e+00 2.000000000000000000e+00 4.000000000000000000e+00 2.428614501953125000e+02 5.525000000000000000e+01 6.275000000000000000e+01
3.800000000000000000e+01 6.293923076923076678e+02 3.520437622070312500e+02 -2.828125000000000000e+00 9.999999776482582092e-03 5.882352963089942932e-02 1.682848144531250000e+03 1.820958733558654785e+00 2.000000000000000000e+00 3.000000000000000000e+00 1.863202972412109375e+02 5.575000000000000000e+01 6.275000000000000000e+01
8.000000000000000000e+00 6.290000000000003411e+02 3.564136352539062500e+02 -3.126281738281250000e+00 9.999999776482582092e-03 0.000000000000000000e+00 1.647707763671875000e+03 1.841395616531372070e+00 1.500000000000000000e+01 1.000000000000000000e+00 1.367883300781250000e+02 5.675000000000000000e+01 6.275000000000000000e+01
7.800000000000000000e+01 6.279076923076925141e+02 3.435839538574218750e+02 -3.462921142578125000e+00 1.104858294129371643e-01 0.000000000000000000e+00 1.609878173828125000e+03 1.798987627029418945e+00 2.000000000000000000e+00 4.000000000000000000e+00 1.536001586914062500e+02 5.775000000000000000e+01 6.275000000000000000e+01
3.200000000000000000e+01 6.235153846153846189e+02 3.201058044433593750e+02 -3.629150390625000000e+00 1.979673057794570923e-01 2.352941185235977173e-01 1.590916870117187500e+03 1.751905560493469238e+00 2.000000000000000000e+00 3.000000000000000000e+00 2.867794189453125000e+02 5.825000000000000000e+01 6.275000000000000000e+01
5.100000000000000000e+01 6.132538461538460979e+02 2.815030212402343750e+02 -3.789154052734375000e+00 1.445110887289047241e-01 0.000000000000000000e+00 1.571816040039062500e+03 1.691458225250244141e+00 2.000000000000000000e+00 4.000000000000000000e+00 1.815035705566406250e+02 5.875000000000000000e+01 6.275000000000000000e+01
6.500000000000000000e+01 6.110769230769229807e+02 2.444615478515625000e+02 -3.949157714843750000e+00 4.444757401943206787e-01 0.000000000000000000e+00 1.552715209960937500e+03 1.413769245147705078e+00 1.300000000000000000e+01 4.000000000000000000e+00 5.152690429687500000e+02 5.925000000000000000e+01 6.275000000000000000e+01
7.300000000000000000e+01 5.972384615384614790e+02 2.262081756591796875e+02 -4.109161376953125000e+00 4.032420217990875244e-01 0.000000000000000000e+00 1.533614257812500000e+03 1.611574530601501465e+00 1.300000000000000000e+01 4.000000000000000000e+00 4.747750549316406250e+02 5.975000000000000000e+01 6.275000000000000000e+01
3.500000000000000000e+01 5.691076923076925596e+02 2.188783111572265625e+02 -4.188934326171875000e+00 1.278160512447357178e-01 0.000000000000000000e+00 1.533873046875000000e+03 1.125815391540527344e+00 3.000000000000000000e+00 3.000000000000000000e+00 6.678781890869140625e+01 6.025000000000000000e+01 6.275000000000000000e+01
1.200000000000000000e+01 5.568230769230769965e+02 2.161982727050781250e+02 -4.188507080078125000e+00 1.835780292749404907e-01 5.294117927551269531e-01 1.553491577148437500e+03 1.237807512283325195e+00 3.000000000000000000e+00 1.000000000000000000e+00 1.391033935546875000e+02 6.075000000000000000e+01 6.275000000000000000e+01
4.900000000000000000e+01 5.426769230769230035e+02 2.187539672851562500e+02 -4.188079833984375000e+00 1.845343858003616333e-01 5.294117927551269531e-01 1.573109985351562500e+03 1.352481245994567871e+00 4.000000000000000000e+00 4.000000000000000000e+00 1.120141448974609375e+02 6.125000000000000000e+01 6.275000000000000000e+01
8.000000000000000000e+00 5.264615384615382254e+02 2.248567352294921875e+02 -4.187652587890625000e+00 1.566751301288604736e-01 0.000000000000000000e+00 1.592728515625000000e+03 1.073449611663818359e+00 4.000000000000000000e+00 1.000000000000000000e+00 4.289839935302734375e+01 6.175000000000000000e+01 6.275000000000000000e+01
1.100000000000000000e+01 5.242999999999999545e+02 2.326605682373046875e+02 -4.161926269531250000e+00 1.626763194799423218e-01 0.000000000000000000e+00 1.605632568359375000e+03 7.288734316825866699e-01 2.000000000000000000e+00 1.000000000000000000e+00 5.061751937866210938e+01 6.225000000000000000e+01 6.275000000000000000e+01
3.900000000000000000e+01 5.206461538461537657e+02 2.609403381347656250e+02 -4.093627929687500000e+00 1.762884557247161865e-01 0.000000000000000000e+00 1.626964721679687500e+03 1.711268544197082520e+00 2.000000000000000000e+00 3.000000000000000000e+00 7.053017425537109375e+01 6.325000000000000000e+01 6.275000000000000000e+01
6.500000000000000000e+01 5.784153846153842551e+02 3.355182495117187500e+02 -3.815582275390625000e+00 2.516310811042785645e-01 5.882353186607360840e-01 1.680238037109375000e+03 1.700727939605712891e+00 8.000000000000000000e+00 4.000000000000000000e+00 1.267298507690429688e+02 6.575000000000000000e+01 6.275000000000000000e+01
4.700000000000000000e+01 5.915923076923077133e+02 3.374550781250000000e+02 -3.780639648437500000e+00 2.383357584476470947e-01 3.529411852359771729e-01 1.685128662109375000e+03 1.779790043830871582e+00 1.500000000000000000e+01 4.000000000000000000e+00 1.388295288085937500e+02 6.625000000000000000e+01 6.275000000000000000e+01
4.100000000000000000e+01 5.785692307692305576e+02 3.342755126953125000e+02 -3.745697021484375000e+00 2.771867811679840088e-01 0.000000000000000000e+00 1.690019409179687500e+03 1.780141830444335938e+00 1.500000000000000000e+01 3.000000000000000000e+00 1.352728576660156250e+02 6.675000000000000000e+01 6.275000000000000000e+01
2.800000000000000000e+01 5.689000000000000909e+02 3.295657958984375000e+02 -3.710754394531250000e+00 2.650811374187469482e-01 1.176470592617988586e-01 1.694910034179687500e+03 1.782799839973449707e+00 1.500000000000000000e+01 3.000000000000000000e+00 1.203720855712890625e+02 6.725000000000000000e+01 6.275000000000000000e+01
4.200000000000000000e+01 5.544230769230766782e+02 3.261559753417968750e+02 -3.699981689453125000e+00 2.696712911128997803e-01 8.235294222831726074e-01 1.696353881835937500e+03 1.781576871871948242e+00 1.500000000000000000e+01 3.000000000000000000e+00 1.368985443115234375e+02 6.775000000000000000e+01 6.275000000000000000e+01
3.000000000000000000e+01 5.971076923076921048e+02 3.960295410156250000e+02 -2.772521972656250000e-01 0.000000000000000000e+00 5.882352963089942932e-02 1.963411743164062500e+03 1.876480340957641602e+00 2.000000000000000000e+00 3.000000000000000000e+00 1.364833068847656250e+02 3.425000000000000000e+01 6.325000000000000000e+01
1.300000000000000000e+01 6.200538461538461661e+02 3.969963073730468750e+02 -1.411132812500000000e-01 0.000000000000000000e+00 0.000000000000000000e+00 1.969833496093750000e+03 1.871842145919799805e+00 2.000000000000000000e+00 1.000000000000000000e+00 1.230369338989257812e+02 3.475000000000000000e+01 6.325000000000000000e+01
2.600000000000000000e+01 6.262769230769227988e+02 3.863167724609375000e+02 -4.974365234375000000e-03 0.000000000000000000e+00 0.000000000000000000e+00 1.976255249023437500e+03 1.870638966560363770e+00 2.000000000000000000e+00 3.000000000000000000e+00 1.342785186767578125e+02 3.525000000000000000e+01 6.325000000000000000e+01
3.900000000000000000e+01 6.354615384615387939e+02 3.722080688476562500e+02 1.188964843750000000e-01 0.000000000000000000e+00 0.000000000000000000e+00 1.982393188476562500e+03 1.871158480644226074e+00 2.000000000000000000e+00 3.000000000000000000e+00 1.346921539306640625e+02 3.575000000000000000e+01 6.325000000000000000e+01
7.000000000000000000e+00 6.813692307692306258e+02 3.393678894042968750e+02 3.726196289062500000e-01 0.000000000000000000e+00 0.000000000000000000e+00 1.995717285156250000e+03 1.904244065284729004e+00 2.000000000000000000e+00 1.000000000000000000e+00 2.171823425292968750e+02 3.775000000000000000e+01 6.325000000000000000e+01
3.800000000000000000e+01 6.870384615384616609e+02 3.398249816894531250e+02 2.706298828125000000e-01 0.000000000000000000e+00 0.000000000000000000e+00 1.985359252929687500e+03 1.917489290237426758e+00 2.000000000000000000e+00 3.000000000000000000e+00 1.384600982666015625e+02 3.825000000000000000e+01 6.325000000000000000e+01
4.700000000000000000e+01 6.687692307692309441e+02 3.386242980957031250e+02 1.686706542968750000e-01 0.000000000000000000e+00 0.000000000000000000e+00 1.975001220703125000e+03 1.924080252647399902e+00 2.000000000000000000e+00 4.000000000000000000e+00 6.125212097167968750e+01 3.875000000000000000e+01 6.325000000000000000e+01
6.900000000000000000e+01 6.602307692307688285e+02 3.360320739746093750e+02 6.668090820312500000e-02 0.000000000000000000e+00 0.000000000000000000e+00 1.964643188476562500e+03 1.925929069519042969e+00 2.000000000000000000e+00 4.000000000000000000e+00 5.432164001464843750e+01 3.925000000000000000e+01 6.325000000000000000e+01
5.200000000000000000e+01 6.588461538461534701e+02 3.337562866210937500e+02 -4.751586914062500000e-02 0.000000000000000000e+00 5.882352963089942932e-02 1.955037475585937500e+03 1.915760040283203125e+00 5.000000000000000000e+00 4.000000000000000000e+00 1.559469451904296875e+02 3.975000000000000000e+01 6.325000000000000000e+01
1.900000000000000000e+01 6.960692307692310123e+02 3.287913818359375000e+02 -1.658325195312500000e-01 0.000000000000000000e+00 0.000000000000000000e+00 1.945682495117187500e+03 1.907215595245361328e+00 5.000000000000000000e+00 1.000000000000000000e+00 1.487260131835937500e+02 4.025000000000000000e+01 6.325000000000000000e+01
5.400000000000000000e+01 6.391846153846151992e+02 3.201534729003906250e+02 -2.841186523437500000e-01 0.000000000000000000e+00 5.294117927551269531e-01 1.936327514648437500e+03 1.911491036415100098e+00 5.000000000000000000e+00 4.000000000000000000e+00 7.561797332763671875e+01 4.075000000000000000e+01 6.325000000000000000e+01
1.500000000000000000e+01 6.232153846153848917e+02 3.096600952148437500e+02 -4.024353027343750000e-01 0.000000000000000000e+00 0.000000000000000000e+00 1.926972534179687500e+03 1.671835660934448242e+00 5.000000000000000000e+00 1.000000000000000000e+00 2.854281806945800781e+01 4.125000000000000000e+01 6.325000000000000000e+01
6.300000000000000000e+01 6.103923076923076678e+02 3.005932312011718750e+02 -5.918884277343750000e-01 0.000000000000000000e+00 0.000000000000000000e+00 1.908947875976562500e+03 1.918556213378906250e+00 5.000000000000000000e+00 4.000000000000000000e+00 2.197907829284667969e+01 4.175000000000000000e+01 6.325000000000000000e+01
3.400000000000000000e+01 6.191538461538459615e+02 2.892442321777343750e+02 -9.708251953125000000e-01 0.000000000000000000e+00 0.000000000000000000e+00 1.872898803710937500e+03 1.898014426231384277e+00 2.000000000000000000e+00 3.000000000000000000e+00 1.492221832275390625e+02 4.275000000000000000e+01 6.325000000000000000e+01
6.600000000000000000e+01 6.180000000000001137e+02 2.857371215820312500e+02 -1.161956787109375000e+00 0.000000000000000000e+00 0.000000000000000000e+00 1.855542236328125000e+03 1.879690170288085938e+00 2.000000000000000000e+00 4.000000000000000000e+00 1.206289901733398438e+02 4.325000000000000000e+01 6.325000000000000000e+01
4.600000000000000000e+01 6.251307692307692605e+02 2.824320068359375000e+02 -1.358062744140625000e+00 9.999999776482582092e-03 0.000000000000000000e+00 1.840190063476562500e+03 1.863358855247497559e+00 2.000000000000000000e+00 4.000000000000000000e+00 1.951512298583984375e+02 4.375000000000000000e+01 6.325000000000000000e+01
7.200000000000000000e+01 6.057461538461536747e+02 2.860909423828125000e+02 -1.554199218750000000e+00 0.000000000000000000e+00 0.000000000000000000e+00 1.824837768554687500e+03 1.854976654052734375e+00 2.000000000000000000e+00 4.000000000000000000e+00 1.544219360351562500e+02 4.425000000000000000e+01 6.325000000000000000e+01
6.000000000000000000e+01 5.951538461538463025e+02 2.908451843261718750e+02 -1.750305175781250000e+00 9.999999776482582092e-03 0.000000000000000000e+00 1.809485595703125000e+03 1.848788261413574219e+00 2.000000000000000000e+00 4.000000000000000000e+00 1.805915222167968750e+02 4.475000000000000000e+01 6.325000000000000000e+01
5.400000000000000000e+01 5.937846153846154493e+02 2.963921508789062500e+02 -1.915771484375000000e+00 9.999999776482582092e-03 2.352941185235977173e-01 1.796239624023437500e+03 1.846100091934204102e+00 2.000000000000000000e+00 4.000000000000000000e+00 1.745797729492187500e+02 4.525000000000000000e+01 6.325000000000000000e+01
6.100000000000000000e+01 5.873615384615385437e+02 3.029486999511718750e+02 -2.050598144531250000e+00 9.999999776482582092e-03 0.000000000000000000e+00 1.785100097656250000e+03 1.845919251441955566e+00 2.000000000000000000e+00 4.000000000000000000e+00 1.708264160156250000e+02 4.575000000000000000e+01 6.325000000000000000e+01
6.800000000000000000e+01 5.908076923076922640e+02 3.092461853027343750e+02 -2.185424804687500000e+00 9.999999776482582092e-03 5.882352963089942932e-02 1.773960571289062500e+03 1.844997525215148926e+00 2.000000000000000000e+00 4.000000000000000000e+00 1.866586456298828125e+02 4.625000000000000000e+01 6.325000000000000000e+01
5.600000000000000000e+01 5.928538461538462343e+02 3.128435974121093750e+02 -2.320220947265625000e+00 9.999999776482582092e-03 0.000000000000000000e+00 1.762820922851562500e+03 1.842781782150268555e+00 2.000000000000000000e+00 4.000000000000000000e+00 1.496746215820312500e+02 4.675000000000000000e+01 6.325000000000000000e+01
6.800000000000000000e+01 5.947384615384615927e+02 3.146152343750000000e+02 -2.400207519531250000e+00 9.999999776482582092e-03 5.882352963089942932e-02 1.755952270507812500e+03 1.842107415199279785e+00 2.000000000000000000e+00 4.000000000000000000e+00 1.532293548583984375e+02 4.725000000000000000e+01 6.325000000000000000e+01
1.200000000000000000e+01 5.775692307692307850e+02 3.143875732421875000e+02 -2.461914062500000000e+00 9.999999776482582092e-03 5.882352963089942932e-02 1.750507080078125000e+03 1.841916441917419434e+00 2.000000000000000000e+00 1.000000000000000000e+00 1.428849182128906250e+02 4.775000000000000000e+01 6.325000000000000000e+01
6.100000000000000000e+01 5.807923076923077588e+02 3.160889282226562500e+02 -2.523620605468750000e+00 9.999999776482582092e-03 0.000000000000000000e+00 1.745061889648437500e+03 1.840915918350219727e+00 2.000000000000000000e+00 4.000000000000000000e+00 1.337183685302734375e+02 4.825000000000000000e+01 6.325000000000000000e+01
4.900000000000000000e+01 5.876384615384614563e+02 3.203936157226562500e+02 -2.585327148437500000e+00 9.999999776482582092e-03 0.000000000000000000e+00 1.739616821289062500e+03 1.840142369270324707e+00 2.000000000000000000e+00 4.000000000000000000e+00 1.624213409423828125e+02 4.875000000000000000e+01 6.325000000000000000e+01
3.500000000000000000e+01 5.914846153846157222e+02 3.274750976562500000e+02 -2.586212158203125000e+00 9.999999776482582092e-03 0.000000000000000000e+00 1.737385620117187500e+03 1.838660359382629395e+00 2.000000000000000000e+00 3.000000000000000000e+00 1.378239440917968750e+02 4.925000000000000000e+01 6.325000000000000000e+01
3.300000000000000000e+01 5.910461538461540840e+02 3.340429687500000000e+02 -2.587097167968750000e+00 9.999999776482582092e-03 5.882352963089942932e-02 1.735154541015625000e+03 1.839035391807556152e+00 2.000000000000000000e+00 3.000000000000000000e+00 1.824174346923828125e+02 4.975000000000000000e+01 6.325000000000000000e+01
2.300000000000000000e+01 5.933230769230768828e+02 3.392861022949218750e+02 -2.588012695312500000e+00 9.999999776482582092e-03 5.882352963089942932e-02 1.732923461914062500e+03 1.845778465270996094e+00 5.000000000000000000e+00 3.000000000000000000e+00 1.724827270507812500e+02 5.025000000000000000e+01 6.325000000000000000e+01
2.700000000000000000e+01 5.959000000000003183e+02 3.427788391113281250e+02 -2.585052490234375000e+00 9.999999776482582092e-03 1.764705926179885864e-01 1.730078857421875000e+03 1.849058270454406738e+00 2.000000000000000000e+00 3.000000000000000000e+00 1.569848175048828125e+02 5.075000000000000000e+01 6.325000000000000000e+01
5.300000000000000000e+01 6.271076923076924459e+02 3.362751159667968750e+02 -2.554351806640625000e+00 9.999999776482582092e-03 0.000000000000000000e+00 1.709096679687500000e+03 1.820577740669250488e+00 2.000000000000000000e+00 4.000000000000000000e+00 1.866226806640625000e+02 5.275000000000000000e+01 6.325000000000000000e+01
4.000000000000000000e+01 6.406846153846150855e+02 3.338197631835937500e+02 -2.594146728515625000e+00 9.999999776482582092e-03 0.000000000000000000e+00 1.699925170898437500e+03 1.817445397377014160e+00 2.000000000000000000e+00 3.000000000000000000e+00 1.720932312011718750e+02 5.325000000000000000e+01 6.325000000000000000e+01
4.100000000000000000e+01 6.389846153846151537e+02 3.361205139160156250e+02 -2.673767089843750000e+00 9.999999776482582092e-03 0.000000000000000000e+00 1.681582397460937500e+03 1.827057361602783203e+00 2.000000000000000000e+00 3.000000000000000000e+00 1.237789077758789062e+02 5.425000000000000000e+01 6.325000000000000000e+01
4.900000000000000000e+01 6.354076923076922867e+02 3.409115600585937500e+02 -2.773498535156250000e+00 9.999999776482582092e-03 0.000000000000000000e+00 1.667148559570312500e+03 1.824906229972839355e+00 2.000000000000000000e+00 4.000000000000000000e+00 1.129575195312500000e+02 5.475000000000000000e+01 6.325000000000000000e+01
2.700000000000000000e+01 6.289846153846154948e+02 3.513529968261718750e+02 -3.013000488281250000e+00 9.999999776482582092e-03 5.882353186607360840e-01 1.634772949218750000e+03 1.813964962959289551e+00 2.000000000000000000e+00 3.000000000000000000e+00 1.206268615722656250e+02 5.575000000000000000e+01 6.325000000000000000e+01
4.600000000000000000e+01 6.286153846153845279e+02 3.549364624023437500e+02 -3.132751464843750000e+00 9.999999776482582092e-03 0.000000000000000000e+00 1.618585083007812500e+03 1.809175491333007812e+00 2.000000000000000000e+00 4.000000000000000000e+00 9.963689422607421875e+01 5.625000000000000000e+01 6.325000000000000000e+01
5.800000000000000000e+01 6.429307692307691013e+02 3.550524597167968750e+02 -3.477233886718750000e+00 1.316957026720046997e-01 0.000000000000000000e+00 1.581174316406250000e+03 1.775661349296569824e+00 2.000000000000000000e+00 4.000000000000000000e+00 1.684249420166015625e+02 5.725000000000000000e+01 6.325000000000000000e+01
6.500000000000000000e+01 6.464615384615384528e+02 3.462551879882812500e+02 -3.649475097656250000e+00 2.232478559017181396e-01 2.941176593303680420e-01 1.562468994140625000e+03 1.735004782676696777e+00 1.300000000000000000e+01 4.000000000000000000e+00 2.543610534667968750e+02 5.775000000000000000e+01 6.325000000000000000e+01
5.400000000000000000e+01 6.420076923076921958e+02 3.241203308105468750e+02 -3.828552246093750000e+00 2.425058931112289429e-01 0.000000000000000000e+00 1.542149902343750000e+03 1.672628164291381836e+00 1.300000000000000000e+01 4.000000000000000000e+00 3.362678833007812500e+02 5.825000000000000000e+01 6.325000000000000000e+01
1.800000000000000000e+01 6.369076923076924004e+02 2.843006286621093750e+02 -4.028076171875000000e+00 2.629133164882659912e-01 0.000000000000000000e+00 1.516989868164062500e+03 1.455265402793884277e+00 2.000000000000000000e+00 1.000000000000000000e+00 3.558685607910156250e+02 5.875000000000000000e+01 6.325000000000000000e+01
3.400000000000000000e+01 6.299615384615385665e+02 2.454077301025390625e+02 -4.227600097656250000e+00 5.427086949348449707e-01 0.000000000000000000e+00 1.491829833984375000e+03 1.310138583183288574e+00 1.300000000000000000e+01 3.000000000000000000e+00 4.974203186035156250e+02 5.925000000000000000e+01 6.325000000000000000e+01
3.200000000000000000e+01 5.974846153846153811e+02 2.265634918212890625e+02 -4.427124023437500000e+00 2.747687101364135742e-01 9.411764740943908691e-01 1.466669799804687500e+03 1.619219064712524414e+00 1.300000000000000000e+01 3.000000000000000000e+00 2.528006744384765625e+02 5.975000000000000000e+01 6.325000000000000000e+01
5.400000000000000000e+01 5.772461538461536747e+02 2.227448730468750000e+02 -4.548583984375000000e+00 1.770417988300323486e-01 5.294117927551269531e-01 1.463049438476562500e+03 1.694331526756286621e+00 3.000000000000000000e+00 4.000000000000000000e+00 8.489928436279296875e+01 6.025000000000000000e+01 6.325000000000000000e+01
4.700000000000000000e+01 5.384538461538464844e+02 2.273429718017578125e+02 -4.678649902343750000e+00 2.029389441013336182e-01 0.000000000000000000e+00 1.516807983398437500e+03 1.361774086952209473e+00 2.000000000000000000e+00 4.000000000000000000e+00 9.811804962158203125e+01 6.175000000000000000e+01 6.325000000000000000e+01
5.100000000000000000e+01 5.290923076923073722e+02 2.335573883056640625e+02 -4.696807861328125000e+00 1.971698254346847534e-01 5.882353186607360840e-01 1.526852539062500000e+03 1.695548772811889648e+00 2.000000000000000000e+00 4.000000000000000000e+00 6.543531036376953125e+01 6.225000000000000000e+01 6.325000000000000000e+01
6.000000000000000000e+00 5.176153846153845279e+02 2.546582031250000000e+02 -4.716278076171875000e+00 1.984694451093673706e-01 5.294117927551269531e-01 1.541691772460937500e+03 7.188022136688232422e-01 2.000000000000000000e+00 1.000000000000000000e+00 2.232587242126464844e+01 6.325000000000000000e+01 6.325000000000000000e+01
2.800000000000000000e+01 5.231615384615383846e+02 2.750914916992187500e+02 -4.726013183593750000e+00 2.197491824626922607e-01 2.941176593303680420e-01 1.549111450195312500e+03 7.182718515396118164e-01 2.000000000000000000e+00 3.000000000000000000e+00 3.973295211791992188e+01 6.375000000000000000e+01 6.325000000000000000e+01
3.000000000000000000e+01 5.268538461538462343e+02 2.944979553222656250e+02 -4.675476074218750000e+00 2.323117852210998535e-01 5.294117927551269531e-01 1.558903808593750000e+03 7.189230918884277344e-01 2.000000000000000000e+00 3.000000000000000000e+00 4.320886230468750000e+01 6.425000000000000000e+01 6.325000000000000000e+01
5.200000000000000000e+01 5.661769230769233445e+02 3.166583251953125000e+02 -4.522552490234375000e+00 2.710836827754974365e-01 5.294117927551269531e-01 1.587715209960937500e+03 1.764925360679626465e+00 8.000000000000000000e+00 4.000000000000000000e+00 1.024760513305664062e+02 6.575000000000000000e+01 6.325000000000000000e+01
2.000000000000000000e+01 5.780384615384614335e+02 3.182940673828125000e+02 -4.466918945312500000e+00 2.396465539932250977e-01 0.000000000000000000e+00 1.595244262695312500e+03 1.762064695358276367e+00 8.000000000000000000e+00 3.000000000000000000e+00 4.453123092651367188e+01 6.625000000000000000e+01 6.325000000000000000e+01
2.900000000000000000e+01 5.689153846153848235e+02 3.151655273437500000e+02 -4.411254882812500000e+00 2.885230779647827148e-01 1.176470592617988586e-01 1.602773437500000000e+03 1.761719584465026855e+00 8.000000000000000000e+00 3.000000000000000000e+00 9.048397064208984375e+01 6.675000000000000000e+01 6.325000000000000000e+01
4.300000000000000000e+01 5.577461538461541295e+02 3.095498046875000000e+02 -4.355621337890625000e+00 2.965760827064514160e-01 5.294117927551269531e-01 1.610302612304687500e+03 1.758619546890258789e+00 3.000000000000000000e+00 3.000000000000000000e+00 1.051085357666015625e+02 6.725000000000000000e+01 6.325000000000000000e+01
5.100000000000000000e+01 5.491769230769232308e+02 3.084923706054687500e+02 -4.313659667968750000e+00 2.864720821380615234e-01 2.941176593303680420e-01 1.615285644531250000e+03 1.717470884323120117e+00 3.000000000000000000e+00 4.000000000000000000e+00 1.083146514892578125e+02 6.775000000000000000e+01 6.325000000000000000e+01
2.900000000000000000e+01 5.816769230769232308e+02 3.533385314941406250e+02 -6.060180664062500000e-01 0.000000000000000000e+00 0.000000000000000000e+00 1.898819458007812500e+03 1.847236394882202148e+00 1.500000000000000000e+01 3.000000000000000000e+00 1.377228546142578125e+02 3.375000000000000000e+01 6.375000000000000000e+01
2.900000000000000000e+01 5.808923076923077815e+02 3.529850769042968750e+02 -4.945983886718750000e-01 0.000000000000000000e+00 0.000000000000000000e+00 1.903230468750000000e+03 1.846313357353210449e+00 2.000000000000000000e+00 3.000000000000000000e+00 8.407019805908203125e+01 3.425000000000000000e+01 6.375000000000000000e+01
1.800000000000000000e+01 6.389846153846154948e+02 3.264685363769531250e+02 6.225585937500000000e-03 0.000000000000000000e+00 0.000000000000000000e+00 1.928593505859375000e+03 1.838323593139648438e+00 2.000000000000000000e+00 1.000000000000000000e+00 7.143659973144531250e+01 3.625000000000000000e+01 6.375000000000000000e+01
1.600000000000000000e+01 6.026307692307690331e+02 3.231158447265625000e+02 1.617736816406250000e-01 0.000000000000000000e+00 0.000000000000000000e+00 1.939179687500000000e+03 1.862251520156860352e+00 2.000000000000000000e+00 1.000000000000000000e+00 7.984506225585937500e+01 3.675000000000000000e+01 6.375000000000000000e+01
9.000000000000000000e+00 6.418307692307687375e+02 3.481017456054687500e+02 1.949462890625000000e-01 0.000000000000000000e+00 0.000000000000000000e+00 1.932867065429687500e+03 1.912656784057617188e+00 2.000000000000000000e+00 1.000000000000000000e+00 6.296254348754882812e+01 3.825000000000000000e+01 6.375000000000000000e+01
7.000000000000000000e+01 6.515999999999997954e+02 3.446062316894531250e+02 6.152343750000000000e-02 0.000000000000000000e+00 0.000000000000000000e+00 1.918072387695312500e+03 1.910009026527404785e+00 2.000000000000000000e+00 4.000000000000000000e+00 4.272189712524414062e+01 3.875000000000000000e+01 6.375000000000000000e+01
4.200000000000000000e+01 6.564307692307692150e+02 3.345843811035156250e+02 -7.189941406250000000e-02 0.000000000000000000e+00 0.000000000000000000e+00 1.903277709960937500e+03 1.899217367172241211e+00 2.000000000000000000e+00 3.000000000000000000e+00 3.138884162902832031e+01 3.925000000000000000e+01 6.375000000000000000e+01
3.100000000000000000e+01 6.701923076923080771e+02 3.260355834960937500e+02 -2.013244628906250000e-01 0.000000000000000000e+00 2.941176593303680420e-01 1.892867675781250000e+03 1.887722492218017578e+00 5.000000000000000000e+00 3.000000000000000000e+00 4.191350173950195312e+01 3.975000000000000000e+01 6.375000000000000000e+01
5.500000000000000000e+01 6.432384615384617064e+02 3.128733215332031250e+02 -4.575195312500000000e-01 0.000000000000000000e+00 0.000000000000000000e+00 1.874970336914062500e+03 1.887752056121826172e+00 5.000000000000000000e+00 4.000000000000000000e+00 5.363148880004882812e+01 4.075000000000000000e+01 6.375000000000000000e+01
3.300000000000000000e+01 6.297999999999999545e+02 3.058268432617187500e+02 -5.856323242187500000e-01 0.000000000000000000e+00 5.882352963089942932e-02 1.866021728515625000e+03 1.890324711799621582e+00 5.000000000000000000e+00 3.000000000000000000e+00 4.284943771362304688e+01 4.125000000000000000e+01 6.375000000000000000e+01
4.000000000000000000e+01 6.085461538461536293e+02 2.990067749023437500e+02 -7.911987304687500000e-01 0.000000000000000000e+00 0.000000000000000000e+00 1.847163085937500000e+03 1.888998627662658691e+00 8.000000000000000000e+00 3.000000000000000000e+00 4.371977996826171875e+01 4.175000000000000000e+01 6.375000000000000000e+01
5.300000000000000000e+01 6.061538461538460751e+02 2.949332580566406250e+02 -9.967651367187500000e-01 0.000000000000000000e+00 0.000000000000000000e+00 1.828304321289062500e+03 1.883353233337402344e+00 2.000000000000000000e+00 4.000000000000000000e+00 3.356926345825195312e+01 4.225000000000000000e+01 6.375000000000000000e+01
3.600000000000000000e+01 6.018461538461535838e+02 2.923067932128906250e+02 -1.202331542968750000e+00 0.000000000000000000e+00 0.000000000000000000e+00 1.809445678710937500e+03 1.872653484344482422e+00 2.000000000000000000e+00 3.000000000000000000e+00 7.038959503173828125e+01 4.275000000000000000e+01 6.375000000000000000e+01
4.700000000000000000e+01 6.200615384615383618e+02 2.891723022460937500e+02 -1.408599853515625000e+00 0.000000000000000000e+00 5.882352963089942932e-02 1.791597290039062500e+03 1.860450506210327148e+00 2.000000000000000000e+00 4.000000000000000000e+00 1.149732894897460938e+02 4.325000000000000000e+01 6.375000000000000000e+01
7.800000000000000000e+01 6.074923076923075769e+02 2.896286010742187500e+02 -1.616912841796875000e+00 9.999999776482582092e-03 0.000000000000000000e+00 1.776779907226562500e+03 1.844783067703247070e+00 2.000000000000000000e+00 4.000000000000000000e+00 1.447021484375000000e+02 4.375000000000000000e+01 6.375000000000000000e+01
5.500000000000000000e+01 6.035000000000001137e+02 2.949932250976562500e+02 -2.033538818359375000e+00 0.000000000000000000e+00 5.882353186607360840e-01 1.747145263671875000e+03 1.822020053863525391e+00 2.000000000000000000e+00 4.000000000000000000e+00 6.616540527343750000e+01 4.475000000000000000e+01 6.375000000000000000e+01
6.400000000000000000e+01 5.803076923076926050e+02 3.100271606445312500e+02 -2.357025146484375000e+00 9.999999776482582092e-03 2.352941185235977173e-01 1.723882568359375000e+03 1.814706802368164062e+00 2.000000000000000000e+00 4.000000000000000000e+00 1.447658996582031250e+02 4.575000000000000000e+01 6.375000000000000000e+01
2.000000000000000000e+01 5.833384615384617291e+02 3.145824584960937500e+02 -2.503234863281250000e+00 9.999999776482582092e-03 2.941176593303680420e-01 1.713313354492187500e+03 1.813368678092956543e+00 2.000000000000000000e+00 3.000000000000000000e+00 1.929286041259765625e+02 4.625000000000000000e+01 6.375000000000000000e+01
5.800000000000000000e+01 5.827999999999999545e+02 3.186325683593750000e+02 -2.649475097656250000e+00 9.999999776482582092e-03 0.000000000000000000e+00 1.702744018554687500e+03 1.813447475433349609e+00 2.000000000000000000e+00 4.000000000000000000e+00 1.707355651855468750e+02 4.675000000000000000e+01 6.375000000000000000e+01
4.400000000000000000e+01 5.816153846153844142e+02 3.236405639648437500e+02 -2.737915039062500000e+00 9.999999776482582092e-03 5.882352963089942932e-02 1.695767089843750000e+03 1.813314676284790039e+00 2.000000000000000000e+00 3.000000000000000000e+00 1.345691833496093750e+02 4.725000000000000000e+01 6.375000000000000000e+01
4.500000000000000000e+01 5.735076923076923094e+02 3.287274780273437500e+02 -2.807067871093750000e+00 9.999999776482582092e-03 0.000000000000000000e+00 1.689987426757812500e+03 1.810664415359497070e+00 2.000000000000000000e+00 4.000000000000000000e+00 1.234947052001953125e+02 4.775000000000000000e+01 6.375000000000000000e+01
5.000000000000000000e+01 5.763692307692307395e+02 3.330334777832031250e+02 -2.876251220703125000e+00 9.999999776482582092e-03 0.000000000000000000e+00 1.684207885742187500e+03 1.806359171867370605e+00 2.000000000000000000e+00 4.000000000000000000e+00 1.501897735595703125e+02 4.825000000000000000e+01 6.375000000000000000e+01
3.700000000000000000e+01 5.811846153846153129e+02 3.402288208007812500e+02 -2.941589355468750000e+00 9.999999776482582092e-03 5.882353186607360840e-01 1.676679077148437500e+03 1.803581714630126953e+00 2.000000000000000000e+00 3.000000000000000000e+00 1.578242492675781250e+02 4.925000000000000000e+01 6.375000000000000000e+01
4.000000000000000000e+00 5.814692307692308759e+02 3.439091491699218750e+02 -2.937744140625000000e+00 9.999999776482582092e-03 5.294117927551269531e-01 1.674929809570312500e+03 1.805933833122253418e+00 2.000000000000000000e+00 1.000000000000000000e+00 2.156743011474609375e+02 4.975000000000000000e+01 6.375000000000000000e+01
3.300000000000000000e+01 5.819076923076924004e+02 3.458027343750000000e+02 -2.933929443359375000e+00 9.999999776482582092e-03 0.000000000000000000e+00 1.673180541992187500e+03 1.806175112724304199e+00 2.000000000000000000e+00 3.000000000000000000e+00 1.570371551513671875e+02 5.025000000000000000e+01 6.375000000000000000e+01
3.800000000000000000e+01 5.864999999999998863e+02 3.464522399902343750e+02 -2.923645019531250000e+00 1.046327650547027588e-01 0.000000000000000000e+00 1.671043212890625000e+03 1.806473731994628906e+00 2.000000000000000000e+00 3.000000000000000000e+00 2.112952575683593750e+02 5.075000000000000000e+01 6.375000000000000000e+01
2.700000000000000000e+01 5.917538461538459842e+02 3.443963928222656250e+02 -2.894104003906250000e+00 9.999999776482582092e-03 0.000000000000000000e+00 1.667741455078125000e+03 1.808192133903503418e+00 2.000000000000000000e+00 3.000000000000000000e+00 1.618703155517578125e+02 5.125000000000000000e+01 6.375000000000000000e+01
4.600000000000000000e+01 6.118923076923074404e+02 3.372459106445312500e+02 -2.835021972656250000e+00 1.037205308675765991e-01 0.000000000000000000e+00 1.661137939453125000e+03 1.788004279136657715e+00 2.000000000000000000e+00 4.000000000000000000e+00 1.849607849121093750e+02 5.225000000000000000e+01 6.375000000000000000e+01
4.700000000000000000e+01 6.158692307692307395e+02 3.346021423339843750e+02 -2.830383300781250000e+00 1.351044923067092896e-01 0.000000000000000000e+00 1.655703491210937500e+03 1.778039097785949707e+00 2.000000000000000000e+00 4.000000000000000000e+00 2.245580902099609375e+02 5.275000000000000000e+01 6.375000000000000000e+01
5.900000000000000000e+01 6.204692307692308759e+02 3.331189270019531250e+02 -2.850646972656250000e+00 1.013170182704925537e-01 0.000000000000000000e+00 1.648136474609375000e+03 1.787600994110107422e+00 2.000000000000000000e+00 4.000000000000000000e+00 1.564082641601562500e+02 5.325000000000000000e+01 6.375000000000000000e+01
1.200000000000000000e+01 6.235615384615383618e+02 3.330408325195312500e+02 -2.870910644531250000e+00 9.999999776482582092e-03 0.000000000000000000e+00 1.640569335937500000e+03 1.794536232948303223e+00 2.000000000000000000e+00 1.000000000000000000e+00 9.943991851806640625e+01 5.375000000000000000e+01 6.375000000000000000e+01
5.300000000000000000e+01 6.364615384615383391e+02 3.350580139160156250e+02 -2.891204833984375000e+00 1.032880097627639771e-01 0.000000000000000000e+00 1.633002319335937500e+03 1.789464950561523438e+00 2.000000000000000000e+00 4.000000000000000000e+00 1.412837982177734375e+02 5.425000000000000000e+01 6.375000000000000000e+01
2.500000000000000000e+01 6.397230769230767464e+02 3.385369567871093750e+02 -2.978515625000000000e+00 1.065814495086669922e-01 0.000000000000000000e+00 1.618997924804687500e+03 1.779876589775085449e+00 2.000000000000000000e+00 3.000000000000000000e+00 1.601275329589843750e+02 5.475000000000000000e+01 6.375000000000000000e+01
4.700000000000000000e+01 6.333000000000000682e+02 3.427317810058593750e+02 -3.088195800781250000e+00 1.290003508329391479e-01 1.176470592617988586e-01 1.602847778320312500e+03 1.769878268241882324e+00 2.000000000000000000e+00 4.000000000000000000e+00 1.728561859130859375e+02 5.525000000000000000e+01 6.375000000000000000e+01
3.400000000000000000e+01 6.349384615384612971e+02 3.484380187988281250e+02 -3.197875976562500000e+00 1.308866739273071289e-01 1.176470592617988586e-01 1.586697631835937500e+03 1.772644996643066406e+00 2.000000000000000000e+00 3.000000000000000000e+00 1.732356109619140625e+02 5.575000000000000000e+01 6.375000000000000000e+01
5.400000000000000000e+01 6.304384615384616382e+02 3.530295715332031250e+02 -3.307556152343750000e+00 1.407495290040969849e-01 0.000000000000000000e+00 1.570547607421875000e+03 1.776712179183959961e+00 2.000000000000000000e+00 4.000000000000000000e+00 1.445886383056640625e+02 5.625000000000000000e+01 6.375000000000000000e+01
4.800000000000000000e+01 6.505923076923073722e+02 3.515987243652343750e+02 -3.836059570312500000e+00 1.656980663537979126e-01 0.000000000000000000e+00 1.515059814453125000e+03 1.723132848739624023e+00 2.000000000000000000e+00 4.000000000000000000e+00 1.587140350341796875e+02 5.775000000000000000e+01 6.375000000000000000e+01
6.900000000000000000e+01 6.504307692307695561e+02 3.302217712402343750e+02 -4.027923583984375000e+00 2.326024323701858521e-01 2.352941185235977173e-01 1.493383056640625000e+03 1.659159660339355469e+00 2.000000000000000000e+00 4.000000000000000000e+00 2.113598937988281250e+02 5.825000000000000000e+01 6.375000000000000000e+01
6.800000000000000000e+01 6.446615384615384983e+02 2.898343505859375000e+02 -4.266998291015625000e+00 3.053797483444213867e-01 0.000000000000000000e+00 1.462163696289062500e+03 1.554947376251220703e+00 2.000000000000000000e+00 4.000000000000000000e+00 3.061880798339843750e+02 5.875000000000000000e+01 6.375000000000000000e+01
0.000000000000000000e+00 6.411769230769230035e+02 2.536997070312500000e+02 -4.506042480468750000e+00 5.687211751937866211e-01 0.000000000000000000e+00 1.430944458007812500e+03 1.262591719627380371e+00 1.300000000000000000e+01 1.000000000000000000e+00 6.004534912109375000e+02 5.925000000000000000e+01 6.375000000000000000e+01
3.400000000000000000e+01 6.085923076923075996e+02 2.413231201171875000e+02 -4.745086669921875000e+00 3.249663412570953369e-01 2.941176593303680420e-01 1.399725219726562500e+03 1.470033884048461914e+00 1.300000000000000000e+01 3.000000000000000000e+00 3.246521911621093750e+02 5.975000000000000000e+01 6.375000000000000000e+01
3.600000000000000000e+01 5.888538461538462343e+02 2.381031951904296875e+02 -4.908203125000000000e+00 2.304462790489196777e-01 5.882353186607360840e-01 1.392225952148437500e+03 1.656702399253845215e+00 8.000000000000000000e+00 3.000000000000000000e+00 8.063321685791015625e+01 6.025000000000000000e+01 6.375000000000000000e+01
2.700000000000000000e+01 5.779769230769232990e+02 2.361203460693359375e+02 -4.995361328125000000e+00 2.695106565952301025e-01 0.000000000000000000e+00 1.408446411132812500e+03 1.696091055870056152e+00 8.000000000000000000e+00 3.000000000000000000e+00 1.542065124511718750e+02 6.075000000000000000e+01 6.375000000000000000e+01
6.000000000000000000e+01 5.574769230769231854e+02 2.363177490234375000e+02 -5.082519531250000000e+00 2.215041071176528931e-01 2.352941185235977173e-01 1.424666992187500000e+03 1.713517427444458008e+00 8.000000000000000000e+00 4.000000000000000000e+00 2.936071777343750000e+01 6.125000000000000000e+01 6.375000000000000000e+01
9.000000000000000000e+00 5.425999999999997954e+02 2.388191528320312500e+02 -5.169677734375000000e+00 2.313556820154190063e-01 0.000000000000000000e+00 1.440887451171875000e+03 1.716211318969726562e+00 5.000000000000000000e+00 1.000000000000000000e+00 3.031176757812500000e+01 6.175000000000000000e+01 6.375000000000000000e+01
4.100000000000000000e+01 5.339692307692305349e+02 2.435446472167968750e+02 -5.231689453125000000e+00 2.601302564144134521e-01 2.941176593303680420e-01 1.448072509765625000e+03 1.717199444770812988e+00 5.000000000000000000e+00 3.000000000000000000e+00 8.087287139892578125e+01 6.225000000000000000e+01 6.375000000000000000e+01
1.100000000000000000e+01 5.313615384615382027e+02 2.503399047851562500e+02 -5.285308837890625000e+00 2.817076444625854492e-01 2.352941185235977173e-01 1.452245727539062500e+03 1.713512301445007324e+00 5.000000000000000000e+00 1.000000000000000000e+00 1.121839447021484375e+02 6.275000000000000000e+01 6.375000000000000000e+01
3.700000000000000000e+01 5.283230769230769965e+02 2.609162292480468750e+02 -5.338958740234375000e+00 2.971684336662292480e-01 2.352941185235977173e-01 1.456418945312500000e+03 1.670403838157653809e+00 5.000000000000000000e+00 3.000000000000000000e+00 8.638454437255859375e+01 6.325000000000000000e+01 6.375000000000000000e+01
2.100000000000000000e+01 5.259153846153848235e+02 2.739253845214843750e+02 -5.392578125000000000e+00 2.788417935371398926e-01 6.470588445663452148e-01 1.460592163085937500e+03 1.260586380958557129e+00 3.000000000000000000e+00 3.000000000000000000e+00 4.954720306396484375e+01 6.375000000000000000e+01 6.375000000000000000e+01
5.700000000000000000e+01 5.191307692307690331e+02 2.948798522949218750e+02 -5.315795898437500000e+00 2.982977032661437988e-01 2.352941185235977173e-01 1.477689819335937500e+03 8.840614557266235352e-01 5.000000000000000000e+00 4.000000000000000000e+00 2.267250823974609375e+01 6.475000000000000000e+01 6.375000000000000000e+01
6.000000000000000000e+00 5.464384615384617518e+02 2.944943542480468750e+02 -5.000457763671875000e+00 3.145007491111755371e-01 1.176470592617988586e-01 1.525695190429687500e+03 1.118695259094238281e+00 8.000000000000000000e+00 1.000000000000000000e+00 2.015468215942382812e+01 6.725000000000000000e+01 6.375000000000000000e+01
2.400000000000000000e+01 5.368692307692309669e+02 2.965547180175781250e+02 -4.927337646484375000e+00 3.329153060913085938e-01 1.176470592617988586e-01 1.534217407226562500e+03 1.281568050384521484e+00 3.000000000000000000e+00 3.000000000000000000e+00 4.473249053955078125e+01 6.775000000000000000e+01 6.375000000000000000e+01
2.300000000000000000e+01 6.006384615384616836e+02 3.324515075683593750e+02 -7.740173339843750000e-01 0.000000000000000000e+00 0.000000000000000000e+00 1.846868164062500000e+03 1.795098185539245605e+00 1.500000000000000000e+01 3.000000000000000000e+00 1.152082595825195312e+02 3.325000000000000000e+01 6.425000000000000000e+01
1.600000000000000000e+01 6.056384615384616836e+02 3.323748474121093750e+02 -7.440795898437500000e-01 0.000000000000000000e+00 0.000000000000000000e+00 1.844121826171875000e+03 1.786595821380615234e+00 1.500000000000000000e+01 1.000000000000000000e+00 1.024022140502929688e+02 3.375000000000000000e+01 6.425000000000000000e+01
2.000000000000000000e+01 5.982000000000000455e+02 3.297299194335937500e+02 -6.655883789062500000e-01 0.000000000000000000e+00 0.000000000000000000e+00 1.821031738281250000e+03 1.778809309005737305e+00 2.000000000000000000e+00 3.000000000000000000e+00 6.648329925537109375e+01 3.425000000000000000e+01 6.425000000000000000e+01
1.100000000000000000e+01 6.482846153846154493e+02 3.348474426269531250e+02 -8.325195312500000000e-02 0.000000000000000000e+00 0.000000000000000000e+00 1.769876831054687500e+03 1.863261580467224121e+00 2.000000000000000000e+00 1.000000000000000000e+00 1.222936477661132812e+02 3.825000000000000000e+01 6.425000000000000000e+01
6.300000000000000000e+01 6.994230769230767919e+02 3.235053710937500000e+02 -2.953186035156250000e-01 0.000000000000000000e+00 0.000000000000000000e+00 1.743105346679687500e+03 1.851396679878234863e+00 2.000000000000000000e+00 4.000000000000000000e+00 1.472677764892578125e+02 3.925000000000000000e+01 6.425000000000000000e+01
2.000000000000000000e+01 6.648999999999998636e+02 3.174092407226562500e+02 -3.995971679687500000e-01 0.000000000000000000e+00 0.000000000000000000e+00 1.752369750976562500e+03 1.854122877120971680e+00 2.000000000000000000e+00 3.000000000000000000e+00 7.238677215576171875e+01 3.975000000000000000e+01 6.425000000000000000e+01
5.900000000000000000e+01 6.752384615384617064e+02 3.200859069824218750e+02 -5.032653808593750000e-01 0.000000000000000000e+00 0.000000000000000000e+00 1.769184204101562500e+03 1.858996748924255371e+00 2.000000000000000000e+00 4.000000000000000000e+00 6.483476257324218750e+01 4.025000000000000000e+01 6.425000000000000000e+01
2.200000000000000000e+01 6.528230769230771102e+02 3.242477722167968750e+02 -6.069641113281250000e-01 0.000000000000000000e+00 0.000000000000000000e+00 1.785998657226562500e+03 1.858546018600463867e+00 2.000000000000000000e+00 3.000000000000000000e+00 5.588498687744140625e+01 4.075000000000000000e+01 6.425000000000000000e+01
6.800000000000000000e+01 6.344384615384611834e+02 3.143891601562500000e+02 -7.106323242187500000e-01 0.000000000000000000e+00 0.000000000000000000e+00 1.802813110351562500e+03 1.858566880226135254e+00 2.000000000000000000e+00 4.000000000000000000e+00 2.788251876831054688e+01 4.125000000000000000e+01 6.425000000000000000e+01
1.400000000000000000e+01 6.237461538461537884e+02 3.059900817871093750e+02 -9.111328125000000000e-01 0.000000000000000000e+00 0.000000000000000000e+00 1.785797363281250000e+03 1.854436397552490234e+00 8.000000000000000000e+00 1.000000000000000000e+00 1.331836318969726562e+01 4.175000000000000000e+01 6.425000000000000000e+01
7.300000000000000000e+01 6.228769230769232763e+02 3.070535583496093750e+02 -1.312133789062500000e+00 0.000000000000000000e+00 0.000000000000000000e+00 1.751765991210937500e+03 1.839492440223693848e+00 2.000000000000000000e+00 4.000000000000000000e+00 2.237794876098632812e+01 4.275000000000000000e+01 6.425000000000000000e+01
5.300000000000000000e+01 6.204846153846156085e+02 3.082575073242187500e+02 -1.516296386718750000e+00 0.000000000000000000e+00 0.000000000000000000e+00 1.735576416015625000e+03 1.832300066947937012e+00 2.000000000000000000e+00 4.000000000000000000e+00 6.693189239501953125e+01 4.325000000000000000e+01 6.425000000000000000e+01
4.200000000000000000e+01 5.834384615384617518e+02 3.011523437500000000e+02 -1.946594238281250000e+00 0.000000000000000000e+00 0.000000000000000000e+00 1.708154907226562500e+03 1.833248019218444824e+00 2.000000000000000000e+00 3.000000000000000000e+00 5.291559982299804688e+01 4.425000000000000000e+01 6.425000000000000000e+01
2.700000000000000000e+01 5.767230769230769738e+02 2.960530395507812500e+02 -2.161743164062500000e+00 9.999999776482582092e-03 5.294117927551269531e-01 1.694444091796875000e+03 1.822668194770812988e+00 2.000000000000000000e+00 3.000000000000000000e+00 6.289788818359375000e+01 4.475000000000000000e+01 6.425000000000000000e+01
7.000000000000000000e+01 5.895538461538462798e+02 2.976896362304687500e+02 -2.342895507812500000e+00 9.999999776482582092e-03 2.352941185235977173e-01 1.682846557617187500e+03 1.809222579002380371e+00 2.000000000000000000e+00 4.000000000000000000e+00 7.149057006835937500e+01 4.525000000000000000e+01 6.425000000000000000e+01
7.000000000000000000e+01 5.853153846153850282e+02 3.022886962890625000e+02 -2.490020751953125000e+00 9.999999776482582092e-03 0.000000000000000000e+00 1.673362426757812500e+03 1.799882888793945312e+00 2.000000000000000000e+00 4.000000000000000000e+00 9.729457855224609375e+01 4.575000000000000000e+01 6.425000000000000000e+01
4.800000000000000000e+01 5.687615384615385210e+02 3.073876953125000000e+02 -2.637145996093750000e+00 9.999999776482582092e-03 0.000000000000000000e+00 1.663878295898437500e+03 1.799399971961975098e+00 2.000000000000000000e+00 4.000000000000000000e+00 5.631363296508789062e+01 4.625000000000000000e+01 6.425000000000000000e+01
4.000000000000000000e+01 5.617076923076924686e+02 3.146010437011718750e+02 -2.784301757812500000e+00 9.999999776482582092e-03 0.000000000000000000e+00 1.654394165039062500e+03 1.795306801795959473e+00 2.000000000000000000e+00 3.000000000000000000e+00 1.026345825195312500e+02 4.675000000000000000e+01 6.425000000000000000e+01
5.400000000000000000e+01 5.730846153846154039e+02 3.225552062988281250e+02 -2.882598876953125000e+00 9.999999776482582092e-03 0.000000000000000000e+00 1.647912475585937500e+03 1.788148760795593262e+00 2.000000000000000000e+00 4.000000000000000000e+00 1.946329803466796875e+02 4.725000000000000000e+01 6.425000000000000000e+01
5.400000000000000000e+01 5.729384615384614108e+02 3.299540405273437500e+02 -2.964630126953125000e+00 9.999999776482582092e-03 0.000000000000000000e+00 1.642431640625000000e+03 1.780457377433776855e+00 2.000000000000000000e+00 4.000000000000000000e+00 1.697304840087890625e+02 4.775000000000000000e+01 6.425000000000000000e+01
3.500000000000000000e+01 5.694076923076920593e+02 3.355963134765625000e+02 -3.046661376953125000e+00 9.999999776482582092e-03 5.294117927551269531e-01 1.636950805664062500e+03 1.777241230010986328e+00 2.000000000000000000e+00 3.000000000000000000e+00 1.759429626464843750e+02 4.825000000000000000e+01 6.425000000000000000e+01
5.100000000000000000e+01 5.693846153846154721e+02 3.405243835449218750e+02 -3.128662109375000000e+00 9.999999776482582092e-03 5.882352963089942932e-02 1.631469970703125000e+03 1.772881269454956055e+00 2.000000000000000000e+00 4.000000000000000000e+00 1.065861892700195312e+02 4.875000000000000000e+01 6.425000000000000000e+01
2.600000000000000000e+01 5.669307692307691013e+02 3.440800781250000000e+02 -3.145629882812500000e+00 9.999999776482582092e-03 8.235294222831726074e-01 1.629489501953125000e+03 1.764279723167419434e+00 2.000000000000000000e+00 3.000000000000000000e+00 1.687863464355468750e+02 4.925000000000000000e+01 6.425000000000000000e+01
2.400000000000000000e+01 5.677615384615384073e+02 3.461276855468750000e+02 -3.162597656250000000e+00 1.052541881799697876e-01 0.000000000000000000e+00 1.627509155273437500e+03 1.752630352973937988e+00 2.000000000000000000e+00 3.000000000000000000e+00 1.777696685791015625e+02 4.975000000000000000e+01 6.425000000000000000e+01
3.300000000000000000e+01 5.723615384615384301e+02 3.466789245605468750e+02 -3.179534912109375000e+00 1.316208094358444214e-01 0.000000000000000000e+00 1.625528686523437500e+03 1.738459825515747070e+00 2.000000000000000000e+00 3.000000000000000000e+00 2.254687957763671875e+02 5.025000000000000000e+01 6.425000000000000000e+01
6.000000000000000000e+01 5.825153846153848463e+02 3.438001708984375000e+02 -3.187713623046875000e+00 1.717212200164794922e-01 0.000000000000000000e+00 1.623187255859375000e+03 1.732228994369506836e+00 2.000000000000000000e+00 4.000000000000000000e+00 2.994464416503906250e+02 5.075000000000000000e+01 6.425000000000000000e+01
1.900000000000000000e+01 5.827615384615385210e+02 3.389420471191406250e+02 -3.169525146484375000e+00 1.259730011224746704e-01 0.000000000000000000e+00 1.619762573242187500e+03 1.741056323051452637e+00 2.000000000000000000e+00 1.000000000000000000e+00 2.009418487548828125e+02 5.125000000000000000e+01 6.425000000000000000e+01
4.500000000000000000e+01 5.911999999999999318e+02 3.339353637695312500e+02 -3.151367187500000000e+00 1.166047453880310059e-01 0.000000000000000000e+00 1.616338012695312500e+03 1.740123629570007324e+00 2.000000000000000000e+00 4.000000000000000000e+00 1.813845977783203125e+02 5.175000000000000000e+01 6.425000000000000000e+01
6.100000000000000000e+01 5.991692307692306940e+02 3.299906005859375000e+02 -3.133178710937500000e+00 1.650034040212631226e-01 2.941176593303680420e-01 1.612913452148437500e+03 1.738689541816711426e+00 2.000000000000000000e+00 4.000000000000000000e+00 2.597195434570312500e+02 5.225000000000000000e+01 6.425000000000000000e+01
5.600000000000000000e+01 5.999384615384615245e+02 3.282065124511718750e+02 -3.137298583984375000e+00 1.193528100848197937e-01 5.882352963089942932e-02 1.607239135742187500e+03 1.746850848197937012e+00 2.000000000000000000e+00 4.000000000000000000e+00 1.453194885253906250e+02 5.275000000000000000e+01 6.425000000000000000e+01
6.100000000000000000e+01 6.023230769230766555e+02 3.274351196289062500e+02 -3.163757324218750000e+00 1.051984354853630066e-01 0.000000000000000000e+00 1.599315063476562500e+03 1.759289860725402832e+00 2.000000000000000000e+00 4.000000000000000000e+00 1.097006530761718750e+02 5.325000000000000000e+01 6.425000000000000000e+01
3.200000000000000000e+01 6.115076923076919684e+02 3.285355224609375000e+02 -3.190216064453125000e+00 1.102444902062416077e-01 0.000000000000000000e+00 1.591391113281250000e+03 1.762771844863891602e+00 2.000000000000000000e+00 3.000000000000000000e+00 1.100847015380859375e+02 5.375000000000000000e+01 6.425000000000000000e+01
5.100000000000000000e+01 6.209230769230769056e+02 3.316036987304687500e+02 -3.216644287109375000e+00 1.317505836486816406e-01 1.176470592617988586e-01 1.583467041015625000e+03 1.753358364105224609e+00 2.000000000000000000e+00 4.000000000000000000e+00 1.196012115478515625e+02 5.425000000000000000e+01 6.425000000000000000e+01
5.300000000000000000e+01 6.354538461538463707e+02 3.367466125488281250e+02 -3.301757812500000000e+00 1.443771123886108398e-01 1.176470592617988586e-01 1.570295654296875000e+03 1.742558479309082031e+00 2.000000000000000000e+00 4.000000000000000000e+00 1.412973327636718750e+02 5.475000000000000000e+01 6.425000000000000000e+01
1.200000000000000000e+01 6.333461538461536975e+02 3.429567565917968750e+02 -3.406433105468750000e+00 1.530008316040039062e-01 5.882352963089942932e-02 1.555375000000000000e+03 1.738685011863708496e+00 2.000000000000000000e+00 1.000000000000000000e+00 1.443686523437500000e+02 5.525000000000000000e+01 6.425000000000000000e+01
2.300000000000000000e+01 6.332230769230767464e+02 3.512420043945312500e+02 -3.511077880859375000e+00 1.479935050010681152e-01 0.000000000000000000e+00 1.540454345703125000e+03 1.740821242332458496e+00 2.000000000000000000e+00 3.000000000000000000e+00 1.165971374511718750e+02 5.575000000000000000e+01 6.425000000000000000e+01
2.800000000000000000e+01 6.301769230769225487e+02 3.588768615722656250e+02 -3.615753173828125000e+00 1.677621304988861084e-01 1.176470592617988586e-01 1.525533691406250000e+03 1.742796421051025391e+00 2.000000000000000000e+00 3.000000000000000000e+00 1.539026336669921875e+02 5.625000000000000000e+01 6.425000000000000000e+01
6.000000000000000000e+00 6.353076923076921503e+02 3.657823181152343750e+02 -3.788970947265625000e+00 1.818322539329528809e-01 0.000000000000000000e+00 1.507000000000000000e+03 1.741567969322204590e+00 2.000000000000000000e+00 1.000000000000000000e+00 1.635957031250000000e+02 5.675000000000000000e+01 6.425000000000000000e+01
2.600000000000000000e+01 6.504461538461538339e+02 3.685043640136718750e+02 -3.962158203125000000e+00 1.804778724908828735e-01 2.352941185235977173e-01 1.488466430664062500e+03 1.740563869476318359e+00 2.000000000000000000e+00 3.000000000000000000e+00 1.406294860839843750e+02 5.725000000000000000e+01 6.425000000000000000e+01
3.300000000000000000e+01 6.568000000000000682e+02 3.647002258300781250e+02 -4.135375976562500000e+00 1.921080052852630615e-01 0.000000000000000000e+00 1.469932739257812500e+03 1.721961259841918945e+00 2.000000000000000000e+00 3.000000000000000000e+00 1.352166595458984375e+02 5.775000000000000000e+01 6.425000000000000000e+01
3.900000000000000000e+01 6.440153846153845052e+02 3.483292846679687500e+02 -4.325592041015625000e+00 2.233455032110214233e-01 0.000000000000000000e+00 1.448400878906250000e+03 1.676611185073852539e+00 2.000000000000000000e+00 3.000000000000000000e+00 1.728677978515625000e+02 5.825000000000000000e+01 6.425000000000000000e+01
3.000000000000000000e+01 6.331692307692303530e+02 3.167966003417968750e+02 -4.566864013671875000e+00 2.918429374694824219e-01 0.000000000000000000e+00 1.417873901367187500e+03 1.531033396720886230e+00 2.000000000000000000e+00 3.000000000000000000e+00 2.475953369140625000e+02 5.875000000000000000e+01 6.425000000000000000e+01
1.000000000000000000e+00 6.419307692307691013e+02 2.821239318847656250e+02 -4.808105468750000000e+00 4.723583161830902100e-01 0.000000000000000000e+00 1.387346923828125000e+03 1.238584876060485840e+00 2.000000000000000000e+00 1.000000000000000000e+00 6.204808959960937500e+02 5.925000000000000000e+01 6.425000000000000000e+01
1.000000000000000000e+01 6.216461538461539931e+02 2.626176757812500000e+02 -5.049377441406250000e+00 4.671583771705627441e-01 5.882352963089942932e-02 1.356820068359375000e+03 1.232425332069396973e+00 1.300000000000000000e+01 1.000000000000000000e+00 3.488716735839843750e+02 5.975000000000000000e+01 6.425000000000000000e+01
5.000000000000000000e+01 5.957538461538459842e+02 2.561145935058593750e+02 -5.229736328125000000e+00 3.677893877029418945e-01 0.000000000000000000e+00 1.346018554687500000e+03 1.556828022003173828e+00 1.300000000000000000e+01 4.000000000000000000e+00 2.767161865234375000e+02 6.025000000000000000e+01 6.425000000000000000e+01
5.100000000000000000e+01 5.706153846153844142e+02 2.532682495117187500e+02 -5.349243164062500000e+00 2.493307143449783325e-01 0.000000000000000000e+00 1.354942749023437500e+03 1.491730451583862305e+00 8.000000000000000000e+00 4.000000000000000000e+00 4.517002105712890625e+01 6.075000000000000000e+01 6.425000000000000000e+01
2.800000000000000000e+01 5.602384615384617064e+02 2.531676177978515625e+02 -5.468719482421875000e+00 2.485558539628982544e-01 2.941176593303680420e-01 1.363866943359375000e+03 1.314871549606323242e+00 8.000000000000000000e+00 3.000000000000000000e+00 2.530488586425781250e+01 6.125000000000000000e+01 6.425000000000000000e+01
1.500000000000000000e+01 5.493615384615384301e+02 2.549397888183593750e+02 -5.588195800781250000e+00 2.615861296653747559e-01 0.000000000000000000e+00 1.372791015625000000e+03 1.165308952331542969e+00 8.000000000000000000e+00 1.000000000000000000e+00 2.671332359313964844e+01 6.175000000000000000e+01 6.425000000000000000e+01
3.300000000000000000e+01 5.458846153846156994e+02 2.585883789062500000e+02 -5.682464599609375000e+00 2.915207743644714355e-01 2.352941185235977173e-01 1.376727172851562500e+03 1.594567179679870605e+00 8.000000000000000000e+00 3.000000000000000000e+00 4.164310455322265625e+01 6.225000000000000000e+01 6.425000000000000000e+01
3.500000000000000000e+01 5.405000000000000000e+02 2.642635498046875000e+02 -5.768310546875000000e+00 3.497881591320037842e-01 5.882353186607360840e-01 1.379000732421875000e+03 1.501478791236877441e+00 8.000000000000000000e+00 3.000000000000000000e+00 9.100655364990234375e+01 6.275000000000000000e+01 6.425000000000000000e+01
2.900000000000000000e+01 5.316461538461537657e+02 2.757493896484375000e+02 -5.940032958984375000e+00 3.664012253284454346e-01 5.882353186607360840e-01 1.383547729492187500e+03 1.248060345649719238e+00 5.000000000000000000e+00 3.000000000000000000e+00 8.967392730712890625e+01 6.375000000000000000e+01 6.425000000000000000e+01
9.000000000000000000e+00 5.223846153846159268e+02 2.832896423339843750e+02 -5.905120849609375000e+00 4.164074361324310303e-01 0.000000000000000000e+00 1.390220581054687500e+03 1.248078465461730957e+00 5.000000000000000000e+00 1.000000000000000000e+00 1.530020446777343750e+02 6.425000000000000000e+01 6.425000000000000000e+01
1.700000000000000000e+01 5.179230769230770193e+02 2.901737365722656250e+02 -5.870239257812500000e+00 3.706493675708770752e-01 5.294117927551269531e-01 1.396893432617187500e+03 1.255673170089721680e+00 5.000000000000000000e+00 1.000000000000000000e+00 9.686977386474609375e+01 6.475000000000000000e+01 6.425000000000000000e+01
3.300000000000000000e+01 5.140076923076924231e+02 2.927864379882812500e+02 -5.835327148437500000e+00 3.728040754795074463e-01 2.352941185235977173e-01 1.403566284179687500e+03 1.260848999023437500e+00 5.000000000000000000e+00 3.000000000000000000e+00 4.035059356689453125e+01 6.525000000000000000e+01 6.425000000000000000e+01
3.900000000000000000e+01 5.483461538461538112e+02 2.942566528320312500e+02 -5.719818115234375000e+00 3.823735415935516357e-01 8.235294222831726074e-01 1.420239379882812500e+03 1.371689796447753906e+00 3.000000000000000000e+00 3.000000000000000000e+00 2.546337699890136719e+01 6.625000000000000000e+01 6.425000000000000000e+01
5.000000000000000000e+01 5.381153846153845279e+02 2.947453308105468750e+02 -5.648376464843750000e+00 4.299251437187194824e-01 5.882353186607360840e-01 1.429574096679687500e+03 1.562561988830566406e+00 3.000000000000000000e+00 4.000000000000000000e+00 1.450918579101562500e+02 6.675000000000000000e+01 6.425000000000000000e+01
1.400000000000000000e+01 5.333076923076920366e+02 2.928750000000000000e+02 -5.576904296875000000e+00 4.458491206169128418e-01 1.176470592617988586e-01 1.438908813476562500e+03 1.254485368728637695e+00 3.000000000000000000e+00 1.000000000000000000e+00 1.281620941162109375e+02 6.725000000000000000e+01 6.425000000000000000e+01
1.700000000000000000e+01 5.968461538461538112e+02 3.056904907226562500e+02 -9.062500000000000000e-01 0.000000000000000000e+00 0.000000000000000000e+00 1.793123535156250000e+03 1.765429496765136719e+00 1.500000000000000000e+01 1.000000000000000000e+00 1.137578964233398438e+02 3.325000000000000000e+01 6.475000000000000000e+01
4.300000000000000000e+01 5.946615384615383846e+02 2.894433288574218750e+02 -8.750305175781250000e-01 0.000000000000000000e+00 2.941176593303680420e-01 1.789879028320312500e+03 1.755221605300903320e+00 2.000000000000000000e+00 3.000000000000000000e+00 8.893630981445312500e+01 3.375000000000000000e+01 6.475000000000000000e+01
4.300000000000000000e+01 5.785461538461539703e+02 2.275151519775390625e+02 -3.384399414062500000e-01 0.000000000000000000e+00 0.000000000000000000e+00 1.606353515625000000e+03 1.827631473541259766e+00 2.000000000000000000e+00 3.000000000000000000e+00 1.049829635620117188e+02 3.725000000000000000e+01 6.475000000000000000e+01
5.000000000000000000e+01 6.539692307692307622e+02 3.165010070800781250e+02 -8.280029296875000000e-01 0.000000000000000000e+00 0.000000000000000000e+00 1.739308715820312500e+03 1.819740414619445801e+00 2.000000000000000000e+00 4.000000000000000000e+00 6.478910827636718750e+01 4.125000000000000000e+01 6.475000000000000000e+01
2.900000000000000000e+01 6.429307692307692150e+02 3.088343505859375000e+02 -1.020660400390625000e+00 0.000000000000000000e+00 0.000000000000000000e+00 1.724486572265625000e+03 1.810087442398071289e+00 2.000000000000000000e+00 3.000000000000000000e+00 1.111411895751953125e+02 4.175000000000000000e+01 6.475000000000000000e+01
1.900000000000000000e+01 6.238230769230768828e+02 3.100764465332031250e+02 -1.213348388671875000e+00 9.999999776482582092e-03 0.000000000000000000e+00 1.709664550781250000e+03 1.808728098869323730e+00 2.000000000000000000e+00 1.000000000000000000e+00 1.138314361572265625e+02 4.225000000000000000e+01 6.475000000000000000e+01
1.700000000000000000e+01 6.217230769230768601e+02 3.175482177734375000e+02 -1.406005859375000000e+00 0.000000000000000000e+00 0.000000000000000000e+00 1.694842407226562500e+03 1.803816080093383789e+00 2.000000000000000000e+00 1.000000000000000000e+00 8.208603668212890625e+01 4.275000000000000000e+01 6.475000000000000000e+01
7.400000000000000000e+01 6.206230769230770647e+02 3.237465515136718750e+02 -1.605804443359375000e+00 0.000000000000000000e+00 0.000000000000000000e+00 1.680593505859375000e+03 1.800040125846862793e+00 2.000000000000000000e+00 4.000000000000000000e+00 3.305767059326171875e+01 4.325000000000000000e+01 6.475000000000000000e+01
1.800000000000000000e+01 5.736000000000000227e+02 2.905101623535156250e+02 -2.600311279296875000e+00 9.999999776482582092e-03 0.000000000000000000e+00 1.624243164062500000e+03 1.781949400901794434e+00 2.000000000000000000e+00 1.000000000000000000e+00 5.741942214965820312e+01 4.575000000000000000e+01 6.475000000000000000e+01
[truncated: 107,903 more chars]
