# Supplementary material for: Environmental Conditions for Alternative Tree Cover States in HighLatitudes
Source: Copernicus journal article supplement (doi:10.5194/bg-2016-401), 2016-10-11
Supplement: Supplementary file 4 [file bg-2016-401-supplement.zip › Analysis/files_to_load_and_import/boreal_na_database.txt]

1.600000000000000000e+01 1.072330769230768965e+03 5.940416870117187500e+02 7.462402343750000000e+00 0.000000000000000000e+00 0.000000000000000000e+00 3.629697265625000000e+03 3.852497100830078125e+00 3.000000000000000000e+00 8.718759918212890625e+01 -1.232500000000000000e+02 4.525000000000000000e+01
5.900000000000000000e+01 1.630007692307692196e+03 6.344095458984375000e+02 5.780090332031250000e+00 0.000000000000000000e+00 0.000000000000000000e+00 3.546297119140625000e+03 2.548612356185913086e+00 4.000000000000000000e+00 3.625658569335937500e+02 -1.222500000000000000e+02 4.525000000000000000e+01
6.900000000000000000e+01 1.415107692307692105e+03 6.452888793945312500e+02 5.099151611328125000e+00 0.000000000000000000e+00 0.000000000000000000e+00 3.296928222656250000e+03 2.334721565246582031e+00 4.000000000000000000e+00 1.114204467773437500e+03 -1.217500000000000000e+02 4.525000000000000000e+01
8.000000000000000000e+00 7.647999999999999545e+02 4.475109863281250000e+02 4.898895263671875000e+00 0.000000000000000000e+00 2.941176593303680420e-01 3.270876464843750000e+03 3.080987930297851562e+00 1.000000000000000000e+00 5.736760253906250000e+02 -1.212500000000000000e+02 4.525000000000000000e+01
1.000000000000000000e+00 2.887692307692308304e+02 2.201305236816406250e+02 4.698638916015625000e+00 0.000000000000000000e+00 1.176470637321472168e+00 3.246973876953125000e+03 2.104991674423217773e+00 1.000000000000000000e+00 7.393183593750000000e+02 -1.207500000000000000e+02 4.525000000000000000e+01
1.000000000000000000e+00 2.769307692307692150e+02 2.014726867675781250e+02 4.498413085937500000e+00 0.000000000000000000e+00 5.882352963089942932e-02 3.225102294921875000e+03 2.125187397003173828e+00 1.000000000000000000e+00 9.002317504882812500e+02 -1.202500000000000000e+02 4.525000000000000000e+01
2.000000000000000000e+00 3.314461538461537202e+02 2.096279296875000000e+02 4.321197509765625000e+00 0.000000000000000000e+00 7.058823704719543457e-01 2.993604492187500000e+03 2.095083475112915039e+00 1.000000000000000000e+00 8.381884155273437500e+02 -1.197500000000000000e+02 4.525000000000000000e+01
4.000000000000000000e+00 3.886692307692306940e+02 2.766211853027343750e+02 4.166992187500000000e+00 0.000000000000000000e+00 1.176470592617988586e-01 2.973130615234375000e+03 2.905186176300048828e+00 1.000000000000000000e+00 1.234169799804687500e+03 -1.192500000000000000e+02 4.525000000000000000e+01
3.900000000000000000e+01 4.215846153846151196e+02 3.266361694335937500e+02 4.012817382812500000e+00 0.000000000000000000e+00 6.470588445663452148e-01 2.950628173828125000e+03 3.785861492156982422e+00 3.000000000000000000e+00 1.466727661132812500e+03 -1.187500000000000000e+02 4.525000000000000000e+01
2.500000000000000000e+01 4.177846153846152788e+02 3.727501831054687500e+02 3.858612060546875000e+00 0.000000000000000000e+00 2.352941185235977173e-01 2.927210449218750000e+03 3.365918636322021484e+00 3.000000000000000000e+00 1.223193481445312500e+03 -1.182500000000000000e+02 4.525000000000000000e+01
6.900000000000000000e+01 3.844076923076922299e+02 3.502135620117187500e+02 3.511199951171875000e+00 0.000000000000000000e+00 1.411764740943908691e+00 2.729595703125000000e+03 2.561030387878417969e+00 4.000000000000000000e+00 1.351202270507812500e+03 -1.177500000000000000e+02 4.525000000000000000e+01
2.100000000000000000e+01 5.797384615384612516e+02 4.371640014648437500e+02 2.687561035156250000e+00 0.000000000000000000e+00 3.529411852359771729e-01 2.664777832031250000e+03 2.532134294509887695e+00 3.000000000000000000e+00 1.321743652343750000e+03 -1.167500000000000000e+02 4.525000000000000000e+01
5.900000000000000000e+01 2.790461538461537998e+02 2.644379272460937500e+02 5.706787109375000000e-02 0.000000000000000000e+00 1.235294103622436523e+00 2.321963134765625000e+03 2.058600902557373047e+00 4.000000000000000000e+00 1.889574462890625000e+03 -1.142500000000000000e+02 4.525000000000000000e+01
2.000000000000000000e+00 2.636846153846154266e+02 2.496418304443359375e+02 -1.014129638671875000e+00 0.000000000000000000e+00 5.882352963089942932e-02 2.321606933593750000e+03 2.255477905273437500e+00 1.000000000000000000e+00 1.697906250000000000e+03 -1.127500000000000000e+02 4.525000000000000000e+01
1.000000000000000000e+01 4.900538461538459956e+02 3.588441162109375000e+02 -8.994140625000000000e-01 0.000000000000000000e+00 0.000000000000000000e+00 2.441755371093750000e+03 2.279029846191406250e+00 3.000000000000000000e+00 1.595843017578125000e+03 -1.117500000000000000e+02 4.525000000000000000e+01
2.000000000000000000e+00 3.494615384615386802e+02 1.580881347656250000e+02 2.164520263671875000e+00 0.000000000000000000e+00 2.352941185235977173e-01 2.857673095703125000e+03 3.158253669738769531e+00 1.000000000000000000e+00 1.455533325195312500e+03 -1.087500000000000000e+02 4.525000000000000000e+01
1.000000000000000000e+00 3.278923076923078384e+02 1.673427429199218750e+02 2.717163085937500000e+00 0.000000000000000000e+00 2.941176593303680420e-01 3.093960693359375000e+03 2.970858335494995117e+00 1.000000000000000000e+00 1.411353637695312500e+03 -1.082500000000000000e+02 4.525000000000000000e+01
2.000000000000000000e+00 3.179461538461539476e+02 2.604367980957031250e+02 3.269805908203125000e+00 0.000000000000000000e+00 1.058823585510253906e+00 3.126695312500000000e+03 3.729613780975341797e+00 1.000000000000000000e+00 1.127680297851562500e+03 -1.077500000000000000e+02 4.525000000000000000e+01
7.000000000000000000e+00 3.306153846153847553e+02 2.340709991455078125e+02 3.822448730468750000e+00 0.000000000000000000e+00 3.529411852359771729e-01 3.156721435546875000e+03 3.804862022399902344e+00 1.000000000000000000e+00 1.180484619140625000e+03 -1.072500000000000000e+02 4.525000000000000000e+01
3.000000000000000000e+00 3.433000000000001251e+02 1.785722351074218750e+02 4.288085937500000000e+00 0.000000000000000000e+00 5.882353186607360840e-01 3.312505371093750000e+03 3.800651788711547852e+00 1.000000000000000000e+00 1.152386230468750000e+03 -1.067500000000000000e+02 4.525000000000000000e+01
1.600000000000000000e+01 3.583076923076922640e+02 1.600307006835937500e+02 4.492614746093750000e+00 0.000000000000000000e+00 7.647058963775634766e-01 3.323978027343750000e+03 3.861819505691528320e+00 3.000000000000000000e+00 1.191721679687500000e+03 -1.062500000000000000e+02 4.525000000000000000e+01
1.000000000000000000e+00 3.774307692307692150e+02 1.592143249511718750e+02 4.697143554687500000e+00 0.000000000000000000e+00 9.411764740943908691e-01 3.332845703125000000e+03 3.187011957168579102e+00 1.000000000000000000e+00 1.080758544921875000e+03 -1.057500000000000000e+02 4.525000000000000000e+01
2.000000000000000000e+00 3.754692307692308191e+02 1.757071228027343750e+02 4.901702880859375000e+00 0.000000000000000000e+00 5.882352963089942932e-02 3.339061767578125000e+03 3.389971971511840820e+00 1.000000000000000000e+00 1.011227966308593750e+03 -1.052500000000000000e+02 4.525000000000000000e+01
1.000000000000000000e+00 3.705153846153845052e+02 1.847846984863281250e+02 5.002197265625000000e+00 0.000000000000000000e+00 0.000000000000000000e+00 3.384424072265625000e+03 3.893035411834716797e+00 1.000000000000000000e+00 1.130598266601562500e+03 -1.047500000000000000e+02 4.525000000000000000e+01
1.000000000000000000e+00 3.436384615384613994e+02 1.859476318359375000e+02 4.998626708984375000e+00 0.000000000000000000e+00 3.529411852359771729e-01 3.379717285156250000e+03 2.984688520431518555e+00 1.000000000000000000e+00 1.007493957519531250e+03 -1.042500000000000000e+02 4.525000000000000000e+01
1.000000000000000000e+00 3.358307692307691923e+02 1.819719848632812500e+02 4.995056152343750000e+00 0.000000000000000000e+00 5.294117927551269531e-01 3.374271728515625000e+03 2.137615919113159180e+00 1.000000000000000000e+00 9.537901000976562500e+02 -1.037500000000000000e+02 4.525000000000000000e+01
4.000000000000000000e+00 3.575076923076924231e+02 1.875175018310546875e+02 4.991516113281250000e+00 0.000000000000000000e+00 0.000000000000000000e+00 3.368844970703125000e+03 3.896698951721191406e+00 1.000000000000000000e+00 9.135078735351562500e+02 -1.032500000000000000e+02 4.525000000000000000e+01
2.000000000000000000e+00 3.768769230769231058e+02 1.973517608642578125e+02 4.920318603515625000e+00 0.000000000000000000e+00 0.000000000000000000e+00 3.356035644531250000e+03 3.908400535583496094e+00 1.000000000000000000e+00 8.618062744140625000e+02 -1.027500000000000000e+02 4.525000000000000000e+01
6.000000000000000000e+00 4.099461538461539476e+02 2.086399230957031250e+02 4.826568603515625000e+00 0.000000000000000000e+00 6.470588445663452148e-01 3.352270507812500000e+03 3.937194108963012695e+00 1.000000000000000000e+00 7.301537475585937500e+02 -1.022500000000000000e+02 4.525000000000000000e+01
4.000000000000000000e+00 4.361153846153846985e+02 2.113619079589843750e+02 4.732818603515625000e+00 0.000000000000000000e+00 0.000000000000000000e+00 3.349326660156250000e+03 3.952824354171752930e+00 1.000000000000000000e+00 6.726934814453125000e+02 -1.017500000000000000e+02 4.525000000000000000e+01
6.000000000000000000e+00 4.483615384615387143e+02 2.180666046142578125e+02 4.639068603515625000e+00 0.000000000000000000e+00 5.294117927551269531e-01 3.347441162109375000e+03 3.959222555160522461e+00 1.000000000000000000e+00 6.652499389648437500e+02 -1.012500000000000000e+02 4.525000000000000000e+01
9.000000000000000000e+00 4.362153846153845507e+02 2.108714904785156250e+02 4.645599365234375000e+00 0.000000000000000000e+00 0.000000000000000000e+00 3.332659667968750000e+03 3.985782861709594727e+00 1.000000000000000000e+00 5.606432495117187500e+02 -1.007500000000000000e+02 4.525000000000000000e+01
4.000000000000000000e+00 5.469692307692307622e+02 2.696683959960937500e+02 4.655456542968750000e+00 0.000000000000000000e+00 0.000000000000000000e+00 3.319161132812500000e+03 3.937541961669921875e+00 1.000000000000000000e+00 5.045122680664062500e+02 -9.925000000000000000e+01 4.525000000000000000e+01
5.000000000000000000e+00 5.794153846153845961e+02 2.693516540527343750e+02 4.622741699218750000e+00 0.000000000000000000e+00 2.941176593303680420e-01 3.318472656250000000e+03 3.930151700973510742e+00 1.000000000000000000e+00 4.106708374023437500e+02 -9.875000000000000000e+01 4.525000000000000000e+01
6.300000000000000000e+01 7.743615384615380890e+02 3.431378784179687500e+02 3.908905029296875000e+00 0.000000000000000000e+00 0.000000000000000000e+00 3.129231445312500000e+03 3.970267772674560547e+00 4.000000000000000000e+00 2.857077331542968750e+02 -9.275000000000000000e+01 4.525000000000000000e+01
5.800000000000000000e+01 7.926076923076926732e+02 3.855066223144531250e+02 4.164611816406250000e+00 0.000000000000000000e+00 0.000000000000000000e+00 3.121708740234375000e+03 3.830453872680664062e+00 4.000000000000000000e+00 3.564528503417968750e+02 -9.125000000000000000e+01 4.525000000000000000e+01
4.900000000000000000e+01 7.869846153846154948e+02 4.076825256347656250e+02 4.352508544921875000e+00 0.000000000000000000e+00 0.000000000000000000e+00 3.126727050781250000e+03 3.089573383331298828e+00 4.000000000000000000e+00 3.954749450683593750e+02 -9.075000000000000000e+01 4.525000000000000000e+01
2.900000000000000000e+01 8.114384615384614108e+02 3.798137207031250000e+02 4.540374755859375000e+00 0.000000000000000000e+00 0.000000000000000000e+00 3.131396728515625000e+03 2.515947341918945312e+00 3.000000000000000000e+00 4.708270568847656250e+02 -9.025000000000000000e+01 4.525000000000000000e+01
5.700000000000000000e+01 8.001538461538461888e+02 3.764568786621093750e+02 4.750457763671875000e+00 0.000000000000000000e+00 0.000000000000000000e+00 3.019171386718750000e+03 3.596126317977905273e+00 4.000000000000000000e+00 4.281541442871093750e+02 -8.975000000000000000e+01 4.525000000000000000e+01
5.400000000000000000e+01 7.713999999999997499e+02 3.666658630371093750e+02 4.982727050781250000e+00 0.000000000000000000e+00 0.000000000000000000e+00 3.007521240234375000e+03 3.567088603973388672e+00 4.000000000000000000e+00 4.698607482910156250e+02 -8.925000000000000000e+01 4.525000000000000000e+01
6.000000000000000000e+01 7.464153846153842551e+02 3.977831420898437500e+02 5.215026855468750000e+00 0.000000000000000000e+00 0.000000000000000000e+00 2.991324707031250000e+03 3.337230920791625977e+00 4.000000000000000000e+00 4.423210144042968750e+02 -8.875000000000000000e+01 4.525000000000000000e+01
5.600000000000000000e+01 7.732615384615387484e+02 4.053438110351562500e+02 5.447296142578125000e+00 0.000000000000000000e+00 0.000000000000000000e+00 2.970255859375000000e+03 3.600231170654296875e+00 4.000000000000000000e+00 2.781997070312500000e+02 -8.825000000000000000e+01 4.525000000000000000e+01
5.300000000000000000e+01 7.809307692307688740e+02 3.964680175781250000e+02 5.494354248046875000e+00 0.000000000000000000e+00 0.000000000000000000e+00 2.918769775390625000e+03 3.755231857299804688e+00 4.000000000000000000e+00 2.068406524658203125e+02 -8.775000000000000000e+01 4.525000000000000000e+01
2.500000000000000000e+01 8.282461538461537884e+02 4.094894409179687500e+02 4.965698242187500000e+00 0.000000000000000000e+00 0.000000000000000000e+00 2.729503662109375000e+03 9.606044292449951172e-01 3.000000000000000000e+00 2.503367614746093750e+02 -8.425000000000000000e+01 4.525000000000000000e+01
6.900000000000000000e+01 1.086284615384615336e+03 3.840179748535156250e+02 3.721343994140625000e+00 0.000000000000000000e+00 0.000000000000000000e+00 2.717351074218750000e+03 9.614879488945007324e-01 4.000000000000000000e+00 2.606470031738281250e+02 -7.975000000000000000e+01 4.525000000000000000e+01
5.600000000000000000e+01 1.018969230769230535e+03 3.397614135742187500e+02 3.503753662109375000e+00 0.000000000000000000e+00 0.000000000000000000e+00 2.712248046875000000e+03 9.450535774230957031e-01 4.000000000000000000e+00 3.092456970214843750e+02 -7.925000000000000000e+01 4.525000000000000000e+01
6.700000000000000000e+01 9.966153846153846416e+02 3.889110412597656250e+02 3.216308593750000000e+00 0.000000000000000000e+00 0.000000000000000000e+00 2.661257812500000000e+03 9.163748621940612793e-01 4.000000000000000000e+00 4.441153259277343750e+02 -7.825000000000000000e+01 4.525000000000000000e+01
5.900000000000000000e+01 8.734846153846151537e+02 4.055255737304687500e+02 3.146484375000000000e+00 0.000000000000000000e+00 0.000000000000000000e+00 2.655050292968750000e+03 9.268832206726074219e-01 4.000000000000000000e+00 3.429736633300781250e+02 -7.775000000000000000e+01 4.525000000000000000e+01
6.600000000000000000e+01 8.759692307692307622e+02 3.794761352539062500e+02 3.076629638671875000e+00 0.000000000000000000e+00 0.000000000000000000e+00 2.648684570312500000e+03 9.418959021568298340e-01 4.000000000000000000e+00 3.086385498046875000e+02 -7.725000000000000000e+01 4.525000000000000000e+01
1.400000000000000000e+01 8.058384615384616154e+02 4.213399047851562500e+02 2.866485595703125000e+00 0.000000000000000000e+00 0.000000000000000000e+00 2.587696533203125000e+03 9.722930788993835449e-01 3.000000000000000000e+00 1.203653717041015625e+02 -7.625000000000000000e+01 4.525000000000000000e+01
1.400000000000000000e+01 9.248384615384613880e+02 4.829685974121093750e+02 2.740264892578125000e+00 0.000000000000000000e+00 0.000000000000000000e+00 2.579760253906250000e+03 1.429997086524963379e+00 3.000000000000000000e+00 9.532123565673828125e+01 -7.575000000000000000e+01 4.525000000000000000e+01
5.300000000000000000e+01 1.007999999999999886e+03 4.910429077148437500e+02 2.500915527343750000e+00 0.000000000000000000e+00 2.941176593303680420e-01 2.518484375000000000e+03 1.247510671615600586e+00 4.000000000000000000e+00 9.516970062255859375e+01 -7.475000000000000000e+01 4.525000000000000000e+01
5.100000000000000000e+01 1.197900000000001000e+03 5.579771118164062500e+02 2.170196533203125000e+00 0.000000000000000000e+00 2.941176593303680420e-01 2.463142578125000000e+03 9.503039121627807617e-01 4.000000000000000000e+00 1.238608398437500000e+02 -7.275000000000000000e+01 4.525000000000000000e+01
7.100000000000000000e+01 1.194061538461538021e+03 5.882686157226562500e+02 2.162841796875000000e+00 0.000000000000000000e+00 0.000000000000000000e+00 2.459522949218750000e+03 9.345657229423522949e-01 4.000000000000000000e+00 2.760216064453125000e+02 -7.225000000000000000e+01 4.525000000000000000e+01
4.000000000000000000e+01 1.216700000000000045e+03 5.370006713867187500e+02 2.155487060546875000e+00 0.000000000000000000e+00 0.000000000000000000e+00 2.456590820312500000e+03 9.169288277626037598e-01 3.000000000000000000e+00 3.017593383789062500e+02 -7.175000000000000000e+01 4.525000000000000000e+01
6.700000000000000000e+01 1.350184615384615199e+03 5.436701049804687500e+02 2.148101806640625000e+00 0.000000000000000000e+00 0.000000000000000000e+00 2.454624267578125000e+03 8.948280215263366699e-01 4.000000000000000000e+00 6.895606079101562500e+02 -7.125000000000000000e+01 4.525000000000000000e+01
6.600000000000000000e+01 1.358453846153846371e+03 5.435772705078125000e+02 2.265899658203125000e+00 0.000000000000000000e+00 0.000000000000000000e+00 2.464870605468750000e+03 8.719891309738159180e-01 4.000000000000000000e+00 7.850031127929687500e+02 -7.075000000000000000e+01 4.525000000000000000e+01
4.600000000000000000e+01 1.324423076923075996e+03 5.447482299804687500e+02 2.383666992187500000e+00 0.000000000000000000e+00 0.000000000000000000e+00 2.468903076171875000e+03 8.708035349845886230e-01 4.000000000000000000e+00 3.980151672363281250e+02 -7.025000000000000000e+01 4.525000000000000000e+01
6.000000000000000000e+01 1.257876923076922822e+03 5.699851684570312500e+02 2.642333984375000000e+00 0.000000000000000000e+00 0.000000000000000000e+00 2.526920166015625000e+03 8.966609239578247070e-01 4.000000000000000000e+00 1.707548370361328125e+02 -6.925000000000000000e+01 4.525000000000000000e+01
5.600000000000000000e+01 1.142269230769230717e+03 5.576562500000000000e+02 2.852600097656250000e+00 0.000000000000000000e+00 0.000000000000000000e+00 2.537119873046875000e+03 9.199827909469604492e-01 4.000000000000000000e+00 9.235324096679687500e+01 -6.875000000000000000e+01 4.525000000000000000e+01
6.300000000000000000e+01 1.204276923076922458e+03 5.690910034179687500e+02 3.062866210937500000e+00 0.000000000000000000e+00 0.000000000000000000e+00 2.548357666015625000e+03 9.193690419197082520e-01 4.000000000000000000e+00 9.380888366699218750e+01 -6.825000000000000000e+01 4.525000000000000000e+01
6.200000000000000000e+01 1.289069230769230899e+03 5.843118286132812500e+02 3.273132324218750000e+00 0.000000000000000000e+00 0.000000000000000000e+00 2.559870361328125000e+03 1.374963521957397461e+00 4.000000000000000000e+00 1.009424133300781250e+02 -6.775000000000000000e+01 4.525000000000000000e+01
6.400000000000000000e+01 1.369376923076922822e+03 5.764167480468750000e+02 3.528778076171875000e+00 0.000000000000000000e+00 0.000000000000000000e+00 2.586782714843750000e+03 2.262581348419189453e+00 4.000000000000000000e+00 9.084842681884765625e+01 -6.725000000000000000e+01 4.525000000000000000e+01
3.400000000000000000e+01 1.241907692307691377e+03 5.323687133789062500e+02 5.638488769531250000e+00 0.000000000000000000e+00 0.000000000000000000e+00 2.561031005859375000e+03 1.991263747215270996e+00 3.000000000000000000e+00 7.335133361816406250e+01 -6.325000000000000000e+01 4.525000000000000000e+01
4.100000000000000000e+01 1.377430769230769101e+03 5.069645080566406250e+02 5.875183105468750000e+00 0.000000000000000000e+00 0.000000000000000000e+00 2.554607177734375000e+03 2.198659420013427734e+00 3.000000000000000000e+00 2.026185760498046875e+02 -6.275000000000000000e+01 4.525000000000000000e+01
6.700000000000000000e+01 1.720230769230769056e+03 6.565642700195312500e+02 8.455932617187500000e+00 0.000000000000000000e+00 0.000000000000000000e+00 3.694218994140625000e+03 2.578819274902343750e+00 4.000000000000000000e+00 2.294776000976562500e+02 -1.237500000000000000e+02 4.575000000000000000e+01
6.500000000000000000e+01 1.574192307692308532e+03 6.260153198242187500e+02 7.688110351562500000e+00 0.000000000000000000e+00 0.000000000000000000e+00 3.638853027343750000e+03 2.579348564147949219e+00 4.000000000000000000e+00 2.998395080566406250e+02 -1.232500000000000000e+02 4.575000000000000000e+01
1.300000000000000000e+01 1.121107692307692560e+03 5.694894409179687500e+02 6.920288085937500000e+00 0.000000000000000000e+00 0.000000000000000000e+00 3.576416503906250000e+03 1.772955894470214844e+00 3.000000000000000000e+00 3.565056610107421875e+01 -1.227500000000000000e+02 4.575000000000000000e+01
6.700000000000000000e+01 2.000984615384615608e+03 6.294533081054687500e+02 6.152465820312500000e+00 0.000000000000000000e+00 0.000000000000000000e+00 3.517161376953125000e+03 2.599434137344360352e+00 4.000000000000000000e+00 6.608956298828125000e+02 -1.222500000000000000e+02 4.575000000000000000e+01
7.600000000000000000e+01 1.830961538461538566e+03 6.320665893554687500e+02 5.528442382812500000e+00 0.000000000000000000e+00 0.000000000000000000e+00 3.294937988281250000e+03 2.439605236053466797e+00 4.000000000000000000e+00 4.549206848144531250e+02 -1.217500000000000000e+02 4.575000000000000000e+01
4.800000000000000000e+01 8.912692307692307168e+02 4.483576049804687500e+02 5.335906982421875000e+00 0.000000000000000000e+00 2.941176593303680420e-01 3.264122802734375000e+03 3.120883703231811523e+00 4.000000000000000000e+00 3.501225280761718750e+02 -1.212500000000000000e+02 4.575000000000000000e+01
4.000000000000000000e+00 3.453615384615384301e+02 2.396151733398437500e+02 5.143341064453125000e+00 0.000000000000000000e+00 2.941176593303680420e-01 3.235673583984375000e+03 4.032940387725830078e+00 1.000000000000000000e+00 7.079478149414062500e+02 -1.207500000000000000e+02 4.575000000000000000e+01
4.000000000000000000e+00 2.191999999999999318e+02 1.849193878173828125e+02 4.950805664062500000e+00 0.000000000000000000e+00 8.235294222831726074e-01 3.209546142578125000e+03 3.538486003875732422e+00 1.000000000000000000e+00 2.746874694824218750e+02 -1.202500000000000000e+02 4.575000000000000000e+01
7.000000000000000000e+00 1.959461538461536918e+02 1.452718963623046875e+02 4.761291503906250000e+00 0.000000000000000000e+00 1.588235259056091309e+00 3.010949707031250000e+03 4.000669479370117188e+00 1.000000000000000000e+00 1.743455505371093750e+02 -1.197500000000000000e+02 4.575000000000000000e+01
2.000000000000000000e+00 3.515999999999997954e+02 2.416390838623046875e+02 4.388336181640625000e+00 0.000000000000000000e+00 2.411764621734619141e+00 2.953054199218750000e+03 4.185682773590087891e+00 1.000000000000000000e+00 4.907540283203125000e+02 -1.187500000000000000e+02 4.575000000000000000e+01
5.500000000000000000e+01 4.853615384615383732e+02 4.232775878906250000e+02 4.201843261718750000e+00 0.000000000000000000e+00 1.470588207244873047e+00 2.922914550781250000e+03 3.449283838272094727e+00 4.000000000000000000e+00 9.370731201171875000e+02 -1.182500000000000000e+02 4.575000000000000000e+01
4.000000000000000000e+01 4.572384615384618201e+02 4.432369079589843750e+02 3.828735351562500000e+00 0.000000000000000000e+00 2.352941185235977173e-01 2.746780273437500000e+03 2.592496395111083984e+00 3.000000000000000000e+00 1.186978515625000000e+03 -1.177500000000000000e+02 4.575000000000000000e+01
2.700000000000000000e+01 5.019153846153845393e+02 3.208512878417968750e+02 3.393432617187500000e+00 0.000000000000000000e+00 2.941176593303680420e-01 2.702407226562500000e+03 3.113029003143310547e+00 3.000000000000000000e+00 1.358203735351562500e+03 -1.172500000000000000e+02 4.575000000000000000e+01
3.000000000000000000e+00 5.587307692307690559e+02 2.596292114257812500e+02 2.958129882812500000e+00 0.000000000000000000e+00 1.411764740943908691e+00 2.656466552734375000e+03 3.846575975418090820e+00 1.000000000000000000e+00 6.481063842773437500e+02 -1.167500000000000000e+02 4.575000000000000000e+01
3.000000000000000000e+01 6.309769230769229580e+02 3.418236083984375000e+02 2.522827148437500000e+00 0.000000000000000000e+00 1.411764740943908691e+00 2.615168945312500000e+03 2.799054622650146484e+00 3.000000000000000000e+00 8.662194213867187500e+02 -1.162500000000000000e+02 4.575000000000000000e+01
7.100000000000000000e+01 6.121307692307690331e+02 4.860449523925781250e+02 1.968750000000000000e+00 0.000000000000000000e+00 5.294117927551269531e-01 2.453523681640625000e+03 2.225625276565551758e+00 4.000000000000000000e+00 1.583796630859375000e+03 -1.157500000000000000e+02 4.575000000000000000e+01
4.800000000000000000e+01 4.993769230769232763e+02 5.220376586914062500e+02 1.414642333984375000e+00 0.000000000000000000e+00 7.647058963775634766e-01 2.415488769531250000e+03 2.143804311752319336e+00 4.000000000000000000e+00 1.668857910156250000e+03 -1.152500000000000000e+02 4.575000000000000000e+01
5.000000000000000000e+01 3.900153846153846189e+02 4.862987060546875000e+02 8.605651855468750000e-01 0.000000000000000000e+00 8.235294222831726074e-01 2.380380371093750000e+03 2.094846487045288086e+00 4.000000000000000000e+00 1.450809570312500000e+03 -1.147500000000000000e+02 4.575000000000000000e+01
5.700000000000000000e+01 3.077461538461539021e+02 4.041720581054687500e+02 3.769836425781250000e-01 0.000000000000000000e+00 8.823529481887817383e-01 2.305343017578125000e+03 2.070805311203002930e+00 4.000000000000000000e+00 1.879067504882812500e+03 -1.142500000000000000e+02 4.575000000000000000e+01
2.000000000000000000e+00 3.325384615384615472e+02 2.915611267089843750e+02 -4.389648437500000000e-01 0.000000000000000000e+00 0.000000000000000000e+00 2.305875000000000000e+03 2.775451898574829102e+00 1.000000000000000000e+00 1.765903076171875000e+03 -1.127500000000000000e+02 4.575000000000000000e+01
1.000000000000000000e+00 3.358153846153845734e+02 2.747515869140625000e+02 -4.494934082031250000e-01 0.000000000000000000e+00 1.176470592617988586e-01 2.390547851562500000e+03 3.327259063720703125e+00 1.000000000000000000e+00 1.440894287109375000e+03 -1.122500000000000000e+02 4.575000000000000000e+01
5.000000000000000000e+00 4.007923076923075882e+02 2.401125793457031250e+02 -1.985778808593750000e-01 0.000000000000000000e+00 5.882352963089942932e-02 2.425444824218750000e+03 3.542737483978271484e+00 1.000000000000000000e+00 1.478331298828125000e+03 -1.117500000000000000e+02 4.575000000000000000e+01
4.000000000000000000e+00 4.265923076923075428e+02 3.066191406250000000e+02 8.500366210937500000e-01 0.000000000000000000e+00 2.352941185235977173e-01 2.715644531250000000e+03 3.295426130294799805e+00 1.000000000000000000e+00 1.373283325195312500e+03 -1.102500000000000000e+02 4.575000000000000000e+01
8.000000000000000000e+00 4.145307692307691809e+02 2.850620422363281250e+02 1.495391845703125000e+00 0.000000000000000000e+00 8.235294222831726074e-01 2.772695068359375000e+03 3.639435291290283203e+00 1.000000000000000000e+00 1.224311767578125000e+03 -1.097500000000000000e+02 4.575000000000000000e+01
1.000000000000000000e+00 3.925692307692307281e+02 1.881030731201171875e+02 2.140777587890625000e+00 0.000000000000000000e+00 0.000000000000000000e+00 2.831284667968750000e+03 3.804097414016723633e+00 1.000000000000000000e+00 1.337957031250000000e+03 -1.092500000000000000e+02 4.575000000000000000e+01
1.000000000000000000e+00 3.547923076923076451e+02 1.646867370605468750e+02 2.786132812500000000e+00 0.000000000000000000e+00 4.705882370471954346e-01 2.882978515625000000e+03 3.807306289672851562e+00 1.000000000000000000e+00 1.067005859375000000e+03 -1.087500000000000000e+02 4.575000000000000000e+01
9.000000000000000000e+00 3.448692307692308532e+02 1.754175415039062500e+02 3.255493164062500000e+00 0.000000000000000000e+00 4.705882370471954346e-01 3.094248291015625000e+03 3.852518081665039062e+00 1.000000000000000000e+00 1.097494506835937500e+03 -1.082500000000000000e+02 4.575000000000000000e+01
1.000000000000000000e+00 3.479153846153845961e+02 1.940204772949218750e+02 3.724853515625000000e+00 0.000000000000000000e+00 7.647058963775634766e-01 3.139726562500000000e+03 3.889575004577636719e+00 1.000000000000000000e+00 9.481448364257812500e+02 -1.077500000000000000e+02 4.575000000000000000e+01
1.000000000000000000e+01 3.551615384615385551e+02 1.893991699218750000e+02 4.194183349609375000e+00 0.000000000000000000e+00 4.117647111415863037e-01 3.181958984375000000e+03 3.840264797210693359e+00 3.000000000000000000e+00 1.007221496582031250e+03 -1.072500000000000000e+02 4.575000000000000000e+01
4.000000000000000000e+00 3.485923076923076565e+02 1.850218200683593750e+02 4.571929931640625000e+00 0.000000000000000000e+00 7.058823704719543457e-01 3.321152099609375000e+03 3.835369586944580078e+00 1.000000000000000000e+00 1.028546142578125000e+03 -1.067500000000000000e+02 4.575000000000000000e+01
7.000000000000000000e+00 3.444384615384615813e+02 1.671529388427734375e+02 4.674865722656250000e+00 0.000000000000000000e+00 4.117647111415863037e-01 3.334927978515625000e+03 3.918171405792236328e+00 1.000000000000000000e+00 9.061692504882812500e+02 -1.062500000000000000e+02 4.575000000000000000e+01
3.000000000000000000e+00 3.710384615384615472e+02 1.650004425048828125e+02 4.777801513671875000e+00 0.000000000000000000e+00 5.294117927551269531e-01 3.345771728515625000e+03 3.935112714767456055e+00 1.000000000000000000e+00 9.489454345703125000e+02 -1.057500000000000000e+02 4.575000000000000000e+01
6.000000000000000000e+00 3.980000000000002274e+02 1.724779815673828125e+02 4.880737304687500000e+00 0.000000000000000000e+00 0.000000000000000000e+00 3.353698242187500000e+03 3.081095695495605469e+00 1.000000000000000000e+00 9.489465332031250000e+02 -1.052500000000000000e+02 4.575000000000000000e+01
4.000000000000000000e+00 4.082153846153847212e+02 1.844602355957031250e+02 4.890838623046875000e+00 0.000000000000000000e+00 1.176470637321472168e+00 3.390621337890625000e+03 3.622791767120361328e+00 1.000000000000000000e+00 9.938185424804687500e+02 -1.047500000000000000e+02 4.575000000000000000e+01
8.000000000000000000e+00 3.802076923076923549e+02 1.867716369628906250e+02 4.808135986328125000e+00 0.000000000000000000e+00 5.882353186607360840e-01 3.383101074218750000e+03 3.726618289947509766e+00 1.000000000000000000e+00 1.041074218750000000e+03 -1.042500000000000000e+02 4.575000000000000000e+01
5.000000000000000000e+00 3.630076923076923094e+02 1.740420074462890625e+02 4.725433349609375000e+00 0.000000000000000000e+00 0.000000000000000000e+00 3.374221923828125000e+03 3.831869363784790039e+00 1.000000000000000000e+00 9.661566772460937500e+02 -1.037500000000000000e+02 4.575000000000000000e+01
8.000000000000000000e+00 3.586769230769231740e+02 1.767017974853515625e+02 4.642730712890625000e+00 0.000000000000000000e+00 0.000000000000000000e+00 3.366237060546875000e+03 3.833910703659057617e+00 1.000000000000000000e+00 9.048753662109375000e+02 -1.032500000000000000e+02 4.575000000000000000e+01
3.000000000000000000e+00 3.681923076923077360e+02 1.932738800048828125e+02 4.551025390625000000e+00 0.000000000000000000e+00 2.352941185235977173e-01 3.353441406250000000e+03 3.839887619018554688e+00 1.000000000000000000e+00 8.481588745117187500e+02 -1.027500000000000000e+02 4.575000000000000000e+01
5.000000000000000000e+00 4.194692307692305917e+02 2.152783508300781250e+02 4.361602783203125000e+00 0.000000000000000000e+00 3.529411852359771729e-01 3.344212890625000000e+03 3.876293420791625977e+00 1.000000000000000000e+00 6.848190307617187500e+02 -1.017500000000000000e+02 4.575000000000000000e+01
7.000000000000000000e+00 4.364384615384612971e+02 2.185375518798828125e+02 4.266876220703125000e+00 0.000000000000000000e+00 4.705882370471954346e-01 3.341753173828125000e+03 3.881774663925170898e+00 1.000000000000000000e+00 5.961851196289062500e+02 -1.012500000000000000e+02 4.575000000000000000e+01
1.000000000000000000e+00 4.345000000000001137e+02 2.166190338134765625e+02 4.294616699218750000e+00 0.000000000000000000e+00 8.235294222831726074e-01 3.330469238281250000e+03 3.910494089126586914e+00 1.000000000000000000e+00 6.131783447265625000e+02 -1.007500000000000000e+02 4.575000000000000000e+01
3.000000000000000000e+00 4.630076923076922526e+02 2.060798339843750000e+02 4.322357177734375000e+00 0.000000000000000000e+00 8.235294222831726074e-01 3.333533691406250000e+03 3.887287378311157227e+00 1.000000000000000000e+00 5.866370849609375000e+02 -1.002500000000000000e+02 4.575000000000000000e+01
4.000000000000000000e+00 4.858384615384615586e+02 2.338948974609375000e+02 4.350097656250000000e+00 0.000000000000000000e+00 0.000000000000000000e+00 3.336635986328125000e+03 3.883026599884033203e+00 1.000000000000000000e+00 5.648046264648437500e+02 -9.975000000000000000e+01 4.575000000000000000e+01
6.000000000000000000e+00 5.261384615384615699e+02 2.595296325683593750e+02 4.365753173828125000e+00 0.000000000000000000e+00 0.000000000000000000e+00 3.323647216796875000e+03 3.879936933517456055e+00 1.000000000000000000e+00 5.911144409179687500e+02 -9.925000000000000000e+01 4.575000000000000000e+01
3.000000000000000000e+00 5.776769230769230035e+02 2.889544372558593750e+02 4.324340820312500000e+00 0.000000000000000000e+00 3.529411852359771729e-01 3.321112792968750000e+03 3.882982492446899414e+00 1.000000000000000000e+00 3.921739807128906250e+02 -9.825000000000000000e+01 4.575000000000000000e+01
5.500000000000000000e+01 7.190230769230772694e+02 3.119446411132812500e+02 3.655761718750000000e+00 0.000000000000000000e+00 2.941176593303680420e-01 3.179280029296875000e+03 3.858378171920776367e+00 4.000000000000000000e+00 3.810711364746093750e+02 -9.475000000000000000e+01 4.575000000000000000e+01
4.000000000000000000e+01 7.591461538461539931e+02 3.280381469726562500e+02 3.474639892578125000e+00 0.000000000000000000e+00 0.000000000000000000e+00 3.122530517578125000e+03 3.891089677810668945e+00 3.000000000000000000e+00 2.705220947265625000e+02 -9.275000000000000000e+01 4.575000000000000000e+01
4.500000000000000000e+01 7.576230769230769511e+02 3.445300903320312500e+02 3.486785888671875000e+00 0.000000000000000000e+00 0.000000000000000000e+00 3.120168457031250000e+03 3.837877273559570312e+00 4.000000000000000000e+00 3.208588256835937500e+02 -9.225000000000000000e+01 4.575000000000000000e+01
5.800000000000000000e+01 7.552846153846151083e+02 3.723968811035156250e+02 3.550445556640625000e+00 0.000000000000000000e+00 0.000000000000000000e+00 3.111820312500000000e+03 3.353128671646118164e+00 4.000000000000000000e+00 3.933424072265625000e+02 -9.175000000000000000e+01 4.575000000000000000e+01
4.400000000000000000e+01 7.529076923076924004e+02 3.768558959960937500e+02 3.768646240234375000e+00 0.000000000000000000e+00 0.000000000000000000e+00 3.119025146484375000e+03 1.885235667228698730e+00 3.000000000000000000e+00 3.856524658203125000e+02 -9.125000000000000000e+01 4.575000000000000000e+01
4.500000000000000000e+01 7.990461538461538566e+02 3.642040405273437500e+02 4.205078125000000000e+00 0.000000000000000000e+00 0.000000000000000000e+00 3.136117431640625000e+03 3.561506986618041992e+00 4.000000000000000000e+00 4.685121459960937500e+02 -9.025000000000000000e+01 4.575000000000000000e+01
4.800000000000000000e+01 7.805615384615383618e+02 3.609486694335937500e+02 4.426300048828125000e+00 0.000000000000000000e+00 0.000000000000000000e+00 3.043817871093750000e+03 2.319310426712036133e+00 4.000000000000000000e+00 4.818140563964843750e+02 -8.975000000000000000e+01 4.575000000000000000e+01
4.700000000000000000e+01 7.530615384615385892e+02 3.853658447265625000e+02 4.650543212890625000e+00 0.000000000000000000e+00 0.000000000000000000e+00 3.030002685546875000e+03 1.462739467620849609e+00 4.000000000000000000e+00 5.006720581054687500e+02 -8.925000000000000000e+01 4.575000000000000000e+01
6.100000000000000000e+01 7.186230769230767237e+02 3.974042968750000000e+02 4.874786376953125000e+00 0.000000000000000000e+00 0.000000000000000000e+00 3.011453613281250000e+03 9.159872531890869141e-01 4.000000000000000000e+00 4.835430297851562500e+02 -8.875000000000000000e+01 4.575000000000000000e+01
5.400000000000000000e+01 7.572000000000002728e+02 3.810452880859375000e+02 5.099029541015625000e+00 0.000000000000000000e+00 0.000000000000000000e+00 2.986979492187500000e+03 9.417324662208557129e-01 4.000000000000000000e+00 3.952954101562500000e+02 -8.825000000000000000e+01 4.575000000000000000e+01
1.800000000000000000e+01 7.931999999999999318e+02 3.751127014160156250e+02 5.130889892578125000e+00 0.000000000000000000e+00 0.000000000000000000e+00 2.929010253906250000e+03 9.597558379173278809e-01 3.000000000000000000e+00 2.927509765625000000e+02 -8.775000000000000000e+01 4.575000000000000000e+01
5.400000000000000000e+01 9.981384615384614563e+02 3.966619567871093750e+02 3.103057861328125000e+00 0.000000000000000000e+00 0.000000000000000000e+00 2.724597656250000000e+03 9.514601230621337891e-01 4.000000000000000000e+00 2.296415710449218750e+02 -8.025000000000000000e+01 4.575000000000000000e+01
6.100000000000000000e+01 1.058207692307692014e+03 4.118653564453125000e+02 2.948486328125000000e+00 0.000000000000000000e+00 2.352941185235977173e-01 2.717898925781250000e+03 9.381765723228454590e-01 4.000000000000000000e+00 3.042209472656250000e+02 -7.975000000000000000e+01 4.575000000000000000e+01
6.300000000000000000e+01 1.029430769230770011e+03 4.143117065429687500e+02 2.793914794921875000e+00 0.000000000000000000e+00 0.000000000000000000e+00 2.711020263671875000e+03 9.151687622070312500e-01 4.000000000000000000e+00 4.207136230468750000e+02 -7.925000000000000000e+01 4.575000000000000000e+01
5.100000000000000000e+01 1.054861538461537748e+03 4.191122436523437500e+02 2.639343261718750000e+00 0.000000000000000000e+00 0.000000000000000000e+00 2.704698730468750000e+03 9.019773602485656738e-01 4.000000000000000000e+00 4.522931518554687500e+02 -7.875000000000000000e+01 4.575000000000000000e+01
6.500000000000000000e+01 9.450615384615383618e+02 4.169147338867187500e+02 2.607421875000000000e+00 0.000000000000000000e+00 0.000000000000000000e+00 2.664086914062500000e+03 8.998112678527832031e-01 4.000000000000000000e+00 4.629186096191406250e+02 -7.825000000000000000e+01 4.575000000000000000e+01
5.200000000000000000e+01 8.289538461538461434e+02 3.953965759277343750e+02 2.575531005859375000e+00 0.000000000000000000e+00 0.000000000000000000e+00 2.655693603515625000e+03 9.259387850761413574e-01 4.000000000000000000e+00 2.760239562988281250e+02 -7.775000000000000000e+01 4.575000000000000000e+01
5.500000000000000000e+01 8.382230769230770875e+02 3.843036193847656250e+02 2.543609619140625000e+00 0.000000000000000000e+00 8.235294222831726074e-01 2.647251708984375000e+03 9.459466934204101562e-01 4.000000000000000000e+00 1.865707855224609375e+02 -7.725000000000000000e+01 4.575000000000000000e+01
6.200000000000000000e+01 1.001353846153846348e+03 4.618544921875000000e+02 2.403564453125000000e+00 0.000000000000000000e+00 0.000000000000000000e+00 2.590334960937500000e+03 9.374040365219116211e-01 4.000000000000000000e+00 2.550958709716796875e+02 -7.625000000000000000e+01 4.575000000000000000e+01
6.200000000000000000e+01 1.018653846153845961e+03 5.001443786621093750e+02 2.310668945312500000e+00 0.000000000000000000e+00 0.000000000000000000e+00 2.579305664062500000e+03 9.369126558303833008e-01 4.000000000000000000e+00 2.293017120361328125e+02 -7.575000000000000000e+01 4.575000000000000000e+01
6.000000000000000000e+01 1.052599999999999909e+03 5.129161987304687500e+02 2.217803955078125000e+00 0.000000000000000000e+00 0.000000000000000000e+00 2.568727539062500000e+03 9.300630688667297363e-01 4.000000000000000000e+00 2.563749694824218750e+02 -7.525000000000000000e+01 4.575000000000000000e+01
4.600000000000000000e+01 1.065684615384614972e+03 5.315325927734375000e+02 2.119201660156250000e+00 0.000000000000000000e+00 0.000000000000000000e+00 2.521252929687500000e+03 9.313778281211853027e-01 4.000000000000000000e+00 2.265335540771484375e+02 -7.475000000000000000e+01 4.575000000000000000e+01
6.000000000000000000e+01 1.128153846153846644e+03 5.210023193359375000e+02 2.014862060546875000e+00 0.000000000000000000e+00 0.000000000000000000e+00 2.510943115234375000e+03 1.602787494659423828e+00 4.000000000000000000e+00 2.675225219726562500e+02 -7.425000000000000000e+01 4.575000000000000000e+01
6.300000000000000000e+01 1.084499999999999545e+03 5.034533081054687500e+02 1.910522460937500000e+00 0.000000000000000000e+00 0.000000000000000000e+00 2.500235107421875000e+03 3.415514945983886719e+00 4.000000000000000000e+00 5.585673141479492188e+01 -7.375000000000000000e+01 4.575000000000000000e+01
1.600000000000000000e+01 1.099438461538461979e+03 5.709292602539062500e+02 1.708953857421875000e+00 0.000000000000000000e+00 2.352941185235977173e-01 2.456335449218750000e+03 9.406006336212158203e-01 3.000000000000000000e+00 1.445616149902343750e+02 -7.225000000000000000e+01 4.575000000000000000e+01
3.700000000000000000e+01 1.394092307692307713e+03 5.407262573242187500e+02 1.668304443359375000e+00 0.000000000000000000e+00 0.000000000000000000e+00 2.451965332031250000e+03 9.065047502517700195e-01 3.000000000000000000e+00 2.908373718261718750e+02 -7.175000000000000000e+01 4.575000000000000000e+01
4.800000000000000000e+01 1.377838461538461388e+03 5.204317626953125000e+02 1.627655029296875000e+00 0.000000000000000000e+00 0.000000000000000000e+00 2.449320312500000000e+03 8.933089971542358398e-01 4.000000000000000000e+00 3.527694396972656250e+02 -7.125000000000000000e+01 4.575000000000000000e+01
6.000000000000000000e+01 1.150284615384615336e+03 5.197618408203125000e+02 1.705688476562500000e+00 0.000000000000000000e+00 0.000000000000000000e+00 2.459083984375000000e+03 8.862516283988952637e-01 4.000000000000000000e+00 3.955530090332031250e+02 -7.075000000000000000e+01 4.575000000000000000e+01
6.600000000000000000e+01 1.201423076923077133e+03 5.215807495117187500e+02 1.783752441406250000e+00 0.000000000000000000e+00 0.000000000000000000e+00 2.464739013671875000e+03 8.714466094970703125e-01 4.000000000000000000e+00 5.849837646484375000e+02 -7.025000000000000000e+01 4.575000000000000000e+01
6.800000000000000000e+01 1.205853846153846234e+03 5.560482177734375000e+02 1.971099853515625000e+00 0.000000000000000000e+00 0.000000000000000000e+00 2.517939941406250000e+03 8.839658498764038086e-01 4.000000000000000000e+00 3.532673645019531250e+02 -6.925000000000000000e+01 4.575000000000000000e+01
6.100000000000000000e+01 1.152646153846153993e+03 5.546845092773437500e+02 2.377258300781250000e+00 0.000000000000000000e+00 0.000000000000000000e+00 2.547488525390625000e+03 9.163369536399841309e-01 4.000000000000000000e+00 1.563813781738281250e+02 -6.825000000000000000e+01 4.575000000000000000e+01
6.300000000000000000e+01 1.260115384615384528e+03 5.718708496093750000e+02 2.580352783203125000e+00 0.000000000000000000e+00 0.000000000000000000e+00 2.562993408203125000e+03 9.168884754180908203e-01 4.000000000000000000e+00 1.596933441162109375e+02 -6.775000000000000000e+01 4.575000000000000000e+01
6.500000000000000000e+01 1.327969230769230307e+03 5.392333374023437500e+02 3.176269531250000000e+00 0.000000000000000000e+00 0.000000000000000000e+00 2.600769287109375000e+03 1.735195636749267578e+00 4.000000000000000000e+00 8.172579193115234375e+01 -6.675000000000000000e+01 4.575000000000000000e+01
6.800000000000000000e+01 1.326584615384615063e+03 5.685342407226562500e+02 3.835418701171875000e+00 0.000000000000000000e+00 0.000000000000000000e+00 2.616437255859375000e+03 1.131384134292602539e+00 4.000000000000000000e+00 1.275015487670898438e+02 -6.575000000000000000e+01 4.575000000000000000e+01
3.600000000000000000e+01 1.486915384615384937e+03 5.738226928710937500e+02 4.143218994140625000e+00 0.000000000000000000e+00 0.000000000000000000e+00 2.623920898437500000e+03 8.873152732849121094e-01 3.000000000000000000e+00 2.176613922119140625e+02 -6.525000000000000000e+01 4.575000000000000000e+01
5.700000000000000000e+01 1.592807692307691468e+03 6.149839477539062500e+02 7.913818359375000000e+00 0.000000000000000000e+00 5.882352963089942932e-02 3.664464599609375000e+03 2.589055538177490234e+00 4.000000000000000000e+00 2.841430358886718750e+02 -1.232500000000000000e+02 4.625000000000000000e+01
6.100000000000000000e+01 1.493761538461538066e+03 5.947539672851562500e+02 7.219329833984375000e+00 0.000000000000000000e+00 0.000000000000000000e+00 3.560503906250000000e+03 2.586648941040039062e+00 4.000000000000000000e+00 2.810413208007812500e+02 -1.227500000000000000e+02 4.625000000000000000e+01
1.100000000000000000e+01 2.116646153846153538e+03 6.609738769531250000e+02 6.524841308593750000e+00 0.000000000000000000e+00 0.000000000000000000e+00 3.273321289062500000e+03 2.353681564331054688e+00 3.000000000000000000e+00 9.669095458984375000e+02 -1.222500000000000000e+02 4.625000000000000000e+01
7.600000000000000000e+01 1.858407692307692287e+03 6.586012573242187500e+02 5.957763671875000000e+00 0.000000000000000000e+00 2.352941185235977173e-01 3.237469238281250000e+03 2.239668369293212891e+00 4.000000000000000000e+00 1.206273193359375000e+03 -1.217500000000000000e+02 4.625000000000000000e+01
4.500000000000000000e+01 1.127738461538461706e+03 5.674865722656250000e+02 5.772918701171875000e+00 0.000000000000000000e+00 4.705882370471954346e-01 3.253563476562500000e+03 2.276426315307617188e+00 4.000000000000000000e+00 1.091559570312500000e+03 -1.212500000000000000e+02 4.625000000000000000e+01
6.000000000000000000e+00 3.761153846153846416e+02 3.513985290527343750e+02 5.588043212890625000e+00 0.000000000000000000e+00 0.000000000000000000e+00 3.220743408203125000e+03 2.805913925170898438e+00 1.000000000000000000e+00 8.770693359375000000e+02 -1.207500000000000000e+02 4.625000000000000000e+01
6.000000000000000000e+00 1.989538461538460297e+02 1.777115783691406250e+02 5.403198242187500000e+00 0.000000000000000000e+00 5.294117927551269531e-01 3.048005126953125000e+03 3.399662494659423828e+00 1.000000000000000000e+00 2.662948608398437500e+02 -1.202500000000000000e+02 4.625000000000000000e+01
5.000000000000000000e+00 2.775000000000000568e+02 1.520032196044921875e+02 4.763854980468750000e+00 0.000000000000000000e+00 1.294117689132690430e+00 2.953810058593750000e+03 4.500523567199707031e+00 1.000000000000000000e+00 2.853581237792968750e+02 -1.187500000000000000e+02 4.625000000000000000e+01
3.000000000000000000e+00 4.764307692307694424e+02 2.875387268066406250e+02 4.545074462890625000e+00 0.000000000000000000e+00 1.352941155433654785e+00 2.828760986328125000e+03 4.333793640136718750e+00 1.000000000000000000e+00 4.090560607910156250e+02 -1.182500000000000000e+02 4.625000000000000000e+01
5.600000000000000000e+01 5.062923076923077588e+02 4.263088989257812500e+02 4.146301269531250000e+00 0.000000000000000000e+00 2.941176414489746094e+00 2.794702148437500000e+03 3.190964698791503906e+00 4.000000000000000000e+00 1.194411621093750000e+03 -1.177500000000000000e+02 4.625000000000000000e+01
2.000000000000000000e+00 4.600384615384618314e+02 3.309536132812500000e+02 3.687500000000000000e+00 0.000000000000000000e+00 1.117647051811218262e+00 2.709930175781250000e+03 4.105258941650390625e+00 1.000000000000000000e+00 8.644212646484375000e+02 -1.172500000000000000e+02 4.625000000000000000e+01
4.500000000000000000e+01 5.427615384615385210e+02 2.852466735839843750e+02 3.228698730468750000e+00 0.000000000000000000e+00 1.529411792755126953e+00 2.637511718750000000e+03 4.135430335998535156e+00 4.000000000000000000e+00 1.109067382812500000e+03 -1.167500000000000000e+02 4.625000000000000000e+01
7.300000000000000000e+01 6.738153846153849145e+02 5.489719238281250000e+02 2.229583740234375000e+00 0.000000000000000000e+00 7.058823704719543457e-01 2.459031250000000000e+03 2.447913408279418945e+00 4.000000000000000000e+00 1.079751220703125000e+03 -1.157500000000000000e+02 4.625000000000000000e+01
3.600000000000000000e+01 5.701769230769233445e+02 6.070809326171875000e+02 1.689239501953125000e+00 0.000000000000000000e+00 0.000000000000000000e+00 2.399264892578125000e+03 2.239348888397216797e+00 3.000000000000000000e+00 1.605747924804687500e+03 -1.152500000000000000e+02 4.625000000000000000e+01
5.900000000000000000e+01 4.390846153846153470e+02 5.594276733398437500e+02 1.148895263671875000e+00 0.000000000000000000e+00 1.058823585510253906e+00 2.257133056640625000e+03 2.123803138732910156e+00 4.000000000000000000e+00 1.598050781250000000e+03 -1.147500000000000000e+02 4.625000000000000000e+01
3.400000000000000000e+01 3.381846153846154266e+02 3.610710144042968750e+02 6.969299316406250000e-01 0.000000000000000000e+00 1.235294103622436523e+00 2.236266113281250000e+03 2.248974323272705078e+00 3.000000000000000000e+00 1.719233398437500000e+03 -1.142500000000000000e+02 4.625000000000000000e+01
2.100000000000000000e+01 3.464461538461537771e+02 2.642116088867187500e+02 1.959228515625000000e-01 0.000000000000000000e+00 0.000000000000000000e+00 2.282514892578125000e+03 2.290971994400024414e+00 3.000000000000000000e+00 1.992111083984375000e+03 -1.122500000000000000e+02 4.625000000000000000e+01
2.600000000000000000e+01 3.734769230769230717e+02 1.851010437011718750e+02 5.022583007812500000e-01 0.000000000000000000e+00 0.000000000000000000e+00 2.400446044921875000e+03 3.422381877899169922e+00 3.000000000000000000e+00 1.866824218750000000e+03 -1.117500000000000000e+02 4.625000000000000000e+01
3.100000000000000000e+01 4.227153846153842665e+02 2.638283996582031250e+02 8.085937500000000000e-01 0.000000000000000000e+00 4.117647111415863037e-01 2.462385009765625000e+03 3.113366603851318359e+00 3.000000000000000000e+00 1.730005981445312500e+03 -1.112500000000000000e+02 4.625000000000000000e+01
5.000000000000000000e+00 4.044384615384615813e+02 3.569676208496093750e+02 1.114929199218750000e+00 0.000000000000000000e+00 2.941176593303680420e-01 2.578066162109375000e+03 1.294380784034729004e+00 1.000000000000000000e+00 1.678035400390625000e+03 -1.107500000000000000e+02 4.625000000000000000e+01
3.000000000000000000e+00 3.889769230769231285e+02 2.234486236572265625e+02 2.225769042968750000e+00 0.000000000000000000e+00 0.000000000000000000e+00 2.766115478515625000e+03 3.675563573837280273e+00 1.000000000000000000e+00 1.364005371093750000e+03 -1.097500000000000000e+02 4.625000000000000000e+01
9.000000000000000000e+00 3.756153846153844142e+02 1.694148254394531250e+02 2.816772460937500000e+00 0.000000000000000000e+00 3.529411852359771729e-01 2.859956054687500000e+03 3.778988361358642578e+00 1.000000000000000000e+00 1.169747436523437500e+03 -1.092500000000000000e+02 4.625000000000000000e+01
1.500000000000000000e+01 3.593999999999999773e+02 1.602797851562500000e+02 3.407775878906250000e+00 0.000000000000000000e+00 2.941176593303680420e-01 3.022306396484375000e+03 3.732925653457641602e+00 3.000000000000000000e+00 1.101031127929687500e+03 -1.087500000000000000e+02 4.625000000000000000e+01
1.000000000000000000e+00 3.557307692307691127e+02 1.737257843017578125e+02 3.793823242187500000e+00 0.000000000000000000e+00 8.823529481887817383e-01 3.088929931640625000e+03 3.362066507339477539e+00 1.000000000000000000e+00 1.169681518554687500e+03 -1.082500000000000000e+02 4.625000000000000000e+01
1.000000000000000000e+00 3.464076923076924004e+02 1.864553985595703125e+02 4.179870605468750000e+00 0.000000000000000000e+00 3.529411852359771729e-01 3.157908691406250000e+03 3.595371484756469727e+00 1.000000000000000000e+00 9.332085571289062500e+02 -1.077500000000000000e+02 4.625000000000000000e+01
3.000000000000000000e+00 3.453692307692306258e+02 1.816357116699218750e+02 4.565917968750000000e+00 0.000000000000000000e+00 2.352941185235977173e-01 3.311903076171875000e+03 3.640416860580444336e+00 1.000000000000000000e+00 8.737061157226562500e+02 -1.072500000000000000e+02 4.625000000000000000e+01
4.000000000000000000e+00 3.375692307692310692e+02 1.757928314208984375e+02 4.855773925781250000e+00 0.000000000000000000e+00 6.470588445663452148e-01 3.337521728515625000e+03 3.388258218765258789e+00 1.000000000000000000e+00 8.193965454101562500e+02 -1.067500000000000000e+02 4.625000000000000000e+01
6.000000000000000000e+00 3.325230769230768146e+02 1.618824615478515625e+02 4.857116699218750000e+00 0.000000000000000000e+00 2.941176593303680420e-01 3.350638183593750000e+03 3.630081892013549805e+00 1.000000000000000000e+00 7.896652832031250000e+02 -1.062500000000000000e+02 4.625000000000000000e+01
5.000000000000000000e+00 3.541153846153846416e+02 1.478033142089843750e+02 4.858428955078125000e+00 0.000000000000000000e+00 0.000000000000000000e+00 3.363230224609375000e+03 3.645079851150512695e+00 1.000000000000000000e+00 7.635844726562500000e+02 -1.057500000000000000e+02 4.625000000000000000e+01
1.000000000000000000e+00 4.167846153846153925e+02 1.584257507324218750e+02 4.859771728515625000e+00 0.000000000000000000e+00 0.000000000000000000e+00 3.387496093750000000e+03 3.924557685852050781e+00 1.000000000000000000e+00 7.896727905273437500e+02 -1.052500000000000000e+02 4.625000000000000000e+01
2.000000000000000000e+00 4.435076923076921389e+02 1.689656524658203125e+02 4.779510498046875000e+00 0.000000000000000000e+00 0.000000000000000000e+00 3.384722900390625000e+03 3.900996208190917969e+00 1.000000000000000000e+00 8.700382690429687500e+02 -1.047500000000000000e+02 4.625000000000000000e+01
1.000000000000000000e+00 4.167153846153848917e+02 1.802449645996093750e+02 4.617675781250000000e+00 0.000000000000000000e+00 0.000000000000000000e+00 3.389002685546875000e+03 3.855303287506103516e+00 1.000000000000000000e+00 9.600771484375000000e+02 -1.042500000000000000e+02 4.625000000000000000e+01
1.000000000000000000e+00 3.756461538461539362e+02 1.798527984619140625e+02 4.455810546875000000e+00 0.000000000000000000e+00 1.176470592617988586e-01 3.372072021484375000e+03 3.820609331130981445e+00 1.000000000000000000e+00 9.178685302734375000e+02 -1.037500000000000000e+02 4.625000000000000000e+01
0.000000000000000000e+00 3.664615384615383959e+02 1.761825256347656250e+02 4.293975830078125000e+00 0.000000000000000000e+00 2.941176593303680420e-01 3.315554443359375000e+03 3.805453062057495117e+00 1.000000000000000000e+00 8.784367675781250000e+02 -1.032500000000000000e+02 4.625000000000000000e+01
6.000000000000000000e+00 3.619846153846154948e+02 1.853360443115234375e+02 4.181762695312500000e+00 0.000000000000000000e+00 6.470588445663452148e-01 3.307794677734375000e+03 3.789425373077392578e+00 1.000000000000000000e+00 8.005103759765625000e+02 -1.027500000000000000e+02 4.625000000000000000e+01
4.000000000000000000e+00 3.969153846153845961e+02 1.899311676025390625e+02 3.990386962890625000e+00 0.000000000000000000e+00 0.000000000000000000e+00 3.335589111328125000e+03 3.817467212677001953e+00 1.000000000000000000e+00 6.955894165039062500e+02 -1.017500000000000000e+02 4.625000000000000000e+01
7.000000000000000000e+00 4.189538461538461434e+02 2.021135864257812500e+02 3.894683837890625000e+00 0.000000000000000000e+00 0.000000000000000000e+00 3.282765380859375000e+03 3.812354564666748047e+00 1.000000000000000000e+00 6.290775146484375000e+02 -1.012500000000000000e+02 4.625000000000000000e+01
5.000000000000000000e+00 4.527461538461536747e+02 2.097980041503906250e+02 3.943634033203125000e+00 0.000000000000000000e+00 2.352941185235977173e-01 3.325674804687500000e+03 3.792600870132446289e+00 1.000000000000000000e+00 5.415242919921875000e+02 -1.007500000000000000e+02 4.625000000000000000e+01
4.000000000000000000e+00 4.553461538461538680e+02 2.191775512695312500e+02 3.992553710937500000e+00 0.000000000000000000e+00 2.941176593303680420e-01 3.332849365234375000e+03 3.786752223968505859e+00 1.000000000000000000e+00 5.527991333007812500e+02 -1.002500000000000000e+02 4.625000000000000000e+01
3.300000000000000000e+01 6.989307692307692150e+02 3.186767578125000000e+02 3.267181396484375000e+00 0.000000000000000000e+00 0.000000000000000000e+00 3.177931884765625000e+03 3.805998563766479492e+00 3.000000000000000000e+00 3.863222045898437500e+02 -9.475000000000000000e+01 4.625000000000000000e+01
2.800000000000000000e+01 7.173384615384615017e+02 3.388679504394531250e+02 3.028045654296875000e+00 0.000000000000000000e+00 0.000000000000000000e+00 3.118747314453125000e+03 3.767975568771362305e+00 3.000000000000000000e+00 3.860020446777343750e+02 -9.325000000000000000e+01 4.625000000000000000e+01
3.800000000000000000e+01 7.417538461538458705e+02 3.394151916503906250e+02 3.040405273437500000e+00 0.000000000000000000e+00 0.000000000000000000e+00 3.113697021484375000e+03 3.782386302947998047e+00 3.000000000000000000e+00 3.566663818359375000e+02 -9.275000000000000000e+01 4.625000000000000000e+01
4.500000000000000000e+01 7.400076923076926505e+02 3.375303649902343750e+02 3.052764892578125000e+00 0.000000000000000000e+00 0.000000000000000000e+00 3.040935791015625000e+03 1.660552382469177246e+00 4.000000000000000000e+00 3.573491516113281250e+02 -9.225000000000000000e+01 4.625000000000000000e+01
4.300000000000000000e+01 7.577461538461540158e+02 3.599529418945312500e+02 3.124176025390625000e+00 0.000000000000000000e+00 0.000000000000000000e+00 3.044729248046875000e+03 1.139759421348571777e+00 3.000000000000000000e+00 3.298418884277343750e+02 -9.175000000000000000e+01 4.625000000000000000e+01
4.100000000000000000e+01 7.105769230769230944e+02 3.739111938476562500e+02 3.372711181640625000e+00 0.000000000000000000e+00 0.000000000000000000e+00 3.112397705078125000e+03 1.073204040527343750e+00 3.000000000000000000e+00 4.290896301269531250e+02 -9.125000000000000000e+01 4.625000000000000000e+01
5.900000000000000000e+01 7.191538461538465299e+02 4.060498352050781250e+02 3.621215820312500000e+00 0.000000000000000000e+00 0.000000000000000000e+00 3.131794433593750000e+03 9.355932474136352539e-01 4.000000000000000000e+00 4.554218444824218750e+02 -9.075000000000000000e+01 4.625000000000000000e+01
5.700000000000000000e+01 7.842000000000002728e+02 4.112475891113281250e+02 3.869750976562500000e+00 0.000000000000000000e+00 0.000000000000000000e+00 3.100885253906250000e+03 1.091990590095520020e+00 4.000000000000000000e+00 5.100095520019531250e+02 -9.025000000000000000e+01 4.625000000000000000e+01
4.000000000000000000e+01 7.709461538461539476e+02 3.848157653808593750e+02 4.102111816406250000e+00 0.000000000000000000e+00 0.000000000000000000e+00 3.105143798828125000e+03 1.078135967254638672e+00 3.000000000000000000e+00 5.059528198242187500e+02 -8.975000000000000000e+01 4.625000000000000000e+01
4.700000000000000000e+01 7.451692307692311488e+02 3.996348571777343750e+02 4.318328857421875000e+00 0.000000000000000000e+00 0.000000000000000000e+00 3.059632812500000000e+03 8.991410732269287109e-01 4.000000000000000000e+00 5.262229003906250000e+02 -8.925000000000000000e+01 4.625000000000000000e+01
6.200000000000000000e+01 7.223307692307688512e+02 3.984039916992187500e+02 4.534576416015625000e+00 0.000000000000000000e+00 0.000000000000000000e+00 3.041530273437500000e+03 9.007092714309692383e-01 4.000000000000000000e+00 4.647298583984375000e+02 -8.875000000000000000e+01 4.625000000000000000e+01
5.900000000000000000e+01 7.245461538461537430e+02 3.857439880371093750e+02 4.750793457031250000e+00 0.000000000000000000e+00 0.000000000000000000e+00 2.914254882812500000e+03 9.142629504203796387e-01 4.000000000000000000e+00 4.662372436523437500e+02 -8.825000000000000000e+01 4.625000000000000000e+01
6.500000000000000000e+01 9.172076923076919002e+02 4.322235717773437500e+02 4.717529296875000000e+00 0.000000000000000000e+00 0.000000000000000000e+00 2.871667480468750000e+03 9.375448226928710938e-01 4.000000000000000000e+00 3.420097045898437500e+02 -8.725000000000000000e+01 4.625000000000000000e+01
6.500000000000000000e+01 9.118230769230774513e+02 4.950686645507812500e+02 4.667633056640625000e+00 0.000000000000000000e+00 0.000000000000000000e+00 2.765079833984375000e+03 9.380130767822265625e-01 4.000000000000000000e+00 2.576682128906250000e+02 -8.675000000000000000e+01 4.625000000000000000e+01
5.600000000000000000e+01 8.055461538461532882e+02 4.675172424316406250e+02 4.617736816406250000e+00 0.000000000000000000e+00 0.000000000000000000e+00 2.637604248046875000e+03 1.938717365264892578e+00 4.000000000000000000e+00 2.208110504150390625e+02 -8.625000000000000000e+01 4.625000000000000000e+01
6.200000000000000000e+01 7.002384615384614790e+02 4.115047302246093750e+02 4.246490478515625000e+00 0.000000000000000000e+00 2.352941185235977173e-01 2.752680419921875000e+03 9.252884387969970703e-01 4.000000000000000000e+00 2.407530059814453125e+02 -8.525000000000000000e+01 4.625000000000000000e+01
6.500000000000000000e+01 7.798307692307691923e+02 4.058307189941406250e+02 4.060852050781250000e+00 0.000000000000000000e+00 0.000000000000000000e+00 2.722876708984375000e+03 1.262503981590270996e+00 4.000000000000000000e+00 2.140089416503906250e+02 -8.475000000000000000e+01 4.625000000000000000e+01
4.600000000000000000e+01 8.204230769230770193e+02 3.807220153808593750e+02 3.862213134765625000e+00 0.000000000000000000e+00 0.000000000000000000e+00 2.752462646484375000e+03 2.360927104949951172e+00 4.000000000000000000e+00 1.820630187988281250e+02 -8.425000000000000000e+01 4.625000000000000000e+01
4.800000000000000000e+01 8.447461538461540158e+02 3.314038085937500000e+02 2.752410888671875000e+00 0.000000000000000000e+00 0.000000000000000000e+00 2.780281005859375000e+03 1.841939806938171387e+00 4.000000000000000000e+00 2.223423309326171875e+02 -8.175000000000000000e+01 4.625000000000000000e+01
4.300000000000000000e+01 8.254076923076918320e+02 4.063440856933593750e+02 2.382110595703125000e+00 0.000000000000000000e+00 0.000000000000000000e+00 2.702580322265625000e+03 9.473316073417663574e-01 3.000000000000000000e+00 2.259939575195312500e+02 -8.075000000000000000e+01 4.625000000000000000e+01
2.700000000000000000e+01 8.957538461538460979e+02 4.475372619628906250e+02 2.267150878906250000e+00 0.000000000000000000e+00 0.000000000000000000e+00 2.695428955078125000e+03 9.439798593521118164e-01 3.000000000000000000e+00 1.946758422851562500e+02 -8.025000000000000000e+01 4.625000000000000000e+01
3.800000000000000000e+01 9.457846153846151083e+02 4.889521179199218750e+02 2.084075927734375000e+00 0.000000000000000000e+00 0.000000000000000000e+00 2.708508056640625000e+03 9.312053918838500977e-01 3.000000000000000000e+00 2.459616241455078125e+02 -7.925000000000000000e+01 4.625000000000000000e+01
6.500000000000000000e+01 9.403999999999996362e+02 4.840434570312500000e+02 1.992553710937500000e+00 0.000000000000000000e+00 0.000000000000000000e+00 2.651744873046875000e+03 9.142066836357116699e-01 4.000000000000000000e+00 2.563043212890625000e+02 -7.875000000000000000e+01 4.625000000000000000e+01
7.100000000000000000e+01 9.007461538461536747e+02 4.543480529785156250e+02 1.998565673828125000e+00 0.000000000000000000e+00 0.000000000000000000e+00 2.669236816406250000e+03 9.115326404571533203e-01 4.000000000000000000e+00 2.557548217773437500e+02 -7.825000000000000000e+01 4.625000000000000000e+01
5.900000000000000000e+01 8.927153846153844370e+02 4.033090515136718750e+02 2.004577636718750000e+00 0.000000000000000000e+00 0.000000000000000000e+00 2.656326171875000000e+03 9.253548979759216309e-01 4.000000000000000000e+00 3.084174804687500000e+02 -7.775000000000000000e+01 4.625000000000000000e+01
6.500000000000000000e+01 8.949538461538468255e+02 3.933211669921875000e+02 2.010589599609375000e+00 0.000000000000000000e+00 0.000000000000000000e+00 2.589976318359375000e+03 9.313526749610900879e-01 4.000000000000000000e+00 3.019348144531250000e+02 -7.725000000000000000e+01 4.625000000000000000e+01
5.800000000000000000e+01 9.650461538461538566e+02 4.216457824707031250e+02 2.000213623046875000e+00 0.000000000000000000e+00 0.000000000000000000e+00 2.586224609375000000e+03 9.199632406234741211e-01 4.000000000000000000e+00 2.927533874511718750e+02 -7.675000000000000000e+01 4.625000000000000000e+01
6.300000000000000000e+01 9.464384615384610697e+02 5.032089233398437500e+02 1.881103515625000000e+00 0.000000000000000000e+00 0.000000000000000000e+00 2.577852539062500000e+03 9.180198311805725098e-01 4.000000000000000000e+00 3.250304870605468750e+02 -7.575000000000000000e+01 4.625000000000000000e+01
3.500000000000000000e+01 1.014600000000000591e+03 5.220895385742187500e+02 1.821563720703125000e+00 0.000000000000000000e+00 0.000000000000000000e+00 2.507330810546875000e+03 9.043288230895996094e-01 3.000000000000000000e+00 3.410028991699218750e+02 -7.525000000000000000e+01 4.625000000000000000e+01
6.900000000000000000e+01 1.094330769230769420e+03 5.481616210937500000e+02 1.628875732421875000e+00 0.000000000000000000e+00 0.000000000000000000e+00 2.511954833984375000e+03 8.829041719436645508e-01 4.000000000000000000e+00 4.882854003906250000e+02 -7.425000000000000000e+01 4.625000000000000000e+01
3.600000000000000000e+01 1.059776923076923367e+03 5.255335693359375000e+02 1.520294189453125000e+00 0.000000000000000000e+00 0.000000000000000000e+00 2.494542724609375000e+03 8.862539529800415039e-01 3.000000000000000000e+00 2.838650207519531250e+02 -7.375000000000000000e+01 4.625000000000000000e+01
6.800000000000000000e+01 1.150407692307692287e+03 5.038307800292968750e+02 1.411682128906250000e+00 0.000000000000000000e+00 2.352941185235977173e-01 2.426549316406250000e+03 1.836852192878723145e+00 4.000000000000000000e+00 1.738219757080078125e+02 -7.325000000000000000e+01 4.625000000000000000e+01
3.800000000000000000e+01 1.119223076923076860e+03 5.213794555664062500e+02 1.255096435546875000e+00 0.000000000000000000e+00 0.000000000000000000e+00 2.452386474609375000e+03 2.311452627182006836e+00 3.000000000000000000e+00 8.318289184570312500e+01 -7.225000000000000000e+01 4.625000000000000000e+01
6.700000000000000000e+01 1.238338461538461843e+03 5.403292236328125000e+02 1.181152343750000000e+00 0.000000000000000000e+00 0.000000000000000000e+00 2.443922851562500000e+03 9.063367843627929688e-01 4.000000000000000000e+00 1.645994873046875000e+02 -7.175000000000000000e+01 4.625000000000000000e+01
4.800000000000000000e+01 1.306930769230768874e+03 5.357221069335937500e+02 1.107177734375000000e+00 0.000000000000000000e+00 0.000000000000000000e+00 2.390313720703125000e+03 8.877968788146972656e-01 4.000000000000000000e+00 3.428386840820312500e+02 -7.125000000000000000e+01 4.625000000000000000e+01
6.200000000000000000e+01 1.204638461538461797e+03 5.315548706054687500e+02 1.145507812500000000e+00 0.000000000000000000e+00 0.000000000000000000e+00 2.449380859375000000e+03 8.821114897727966309e-01 4.000000000000000000e+00 2.967801818847656250e+02 -7.075000000000000000e+01 4.625000000000000000e+01
5.500000000000000000e+01 1.193384615384615927e+03 4.960264587402343750e+02 1.183837890625000000e+00 0.000000000000000000e+00 0.000000000000000000e+00 2.459519531250000000e+03 8.683128356933593750e-01 4.000000000000000000e+00 4.172632751464843750e+02 -7.025000000000000000e+01 4.625000000000000000e+01
6.800000000000000000e+01 1.149669230769231035e+03 5.215689086914062500e+02 1.222137451171875000e+00 0.000000000000000000e+00 0.000000000000000000e+00 2.427448242187500000e+03 8.709378838539123535e-01 4.000000000000000000e+00 4.704704589843750000e+02 -6.975000000000000000e+01 4.625000000000000000e+01
6.100000000000000000e+01 1.110984615384615836e+03 5.459500122070312500e+02 1.299865722656250000e+00 0.000000000000000000e+00 0.000000000000000000e+00 2.436332275390625000e+03 8.769529461860656738e-01 4.000000000000000000e+00 3.133165588378906250e+02 -6.925000000000000000e+01 4.625000000000000000e+01
6.900000000000000000e+01 1.134615384615384301e+03 5.284024658203125000e+02 1.495788574218750000e+00 0.000000000000000000e+00 0.000000000000000000e+00 2.521808593750000000e+03 8.832520842552185059e-01 4.000000000000000000e+00 2.283243713378906250e+02 -6.875000000000000000e+01 4.625000000000000000e+01
4.800000000000000000e+01 1.126538461538461434e+03 5.109128417968750000e+02 1.691680908203125000e+00 0.000000000000000000e+00 0.000000000000000000e+00 2.547658935546875000e+03 8.901136517524719238e-01 4.000000000000000000e+00 2.676660766601562500e+02 -6.825000000000000000e+01 4.625000000000000000e+01
4.900000000000000000e+01 1.206315384615384573e+03 5.179691772460937500e+02 1.887573242187500000e+00 0.000000000000000000e+00 0.000000000000000000e+00 2.546516601562500000e+03 2.172959566116333008e+00 4.000000000000000000e+00 1.228268966674804688e+02 -6.775000000000000000e+01 4.625000000000000000e+01
6.700000000000000000e+01 1.335323076923076997e+03 5.199052124023437500e+02 2.164611816406250000e+00 0.000000000000000000e+00 0.000000000000000000e+00 2.558908203125000000e+03 8.838614225387573242e-01 4.000000000000000000e+00 2.204270019531250000e+02 -6.725000000000000000e+01 4.625000000000000000e+01
2.800000000000000000e+01 1.349792307692308668e+03 5.187103881835937500e+02 2.522735595703125000e+00 0.000000000000000000e+00 0.000000000000000000e+00 2.608261230468750000e+03 1.878321766853332520e+00 3.000000000000000000e+00 1.620578002929687500e+02 -6.675000000000000000e+01 4.625000000000000000e+01
4.600000000000000000e+01 1.278084615384615290e+03 5.180870361328125000e+02 2.880859375000000000e+00 0.000000000000000000e+00 0.000000000000000000e+00 2.630754150390625000e+03 2.224163532257080078e+00 4.000000000000000000e+00 1.620080108642578125e+02 -6.625000000000000000e+01 4.625000000000000000e+01
6.600000000000000000e+01 1.252200000000000273e+03 5.256549072265625000e+02 3.238983154296875000e+00 0.000000000000000000e+00 0.000000000000000000e+00 2.637626464843750000e+03 2.246647834777832031e+00 4.000000000000000000e+00 7.362239837646484375e+01 -6.575000000000000000e+01 4.625000000000000000e+01
6.200000000000000000e+01 1.272976923076923867e+03 5.510371093750000000e+02 3.600433349609375000e+00 0.000000000000000000e+00 0.000000000000000000e+00 2.625540771484375000e+03 1.857639431953430176e+00 4.000000000000000000e+00 9.304090881347656250e+01 -6.525000000000000000e+01 4.625000000000000000e+01
6.600000000000000000e+01 1.210646153846154448e+03 5.633942260742187500e+02 3.962982177734375000e+00 0.000000000000000000e+00 0.000000000000000000e+00 2.617487548828125000e+03 9.195128679275512695e-01 4.000000000000000000e+00 5.175208663940429688e+01 -6.475000000000000000e+01 4.625000000000000000e+01
6.400000000000000000e+01 1.602646153846153993e+03 6.121586914062500000e+02 7.995147705078125000e+00 0.000000000000000000e+00 0.000000000000000000e+00 3.634761718750000000e+03 2.614599704742431641e+00 4.000000000000000000e+00 1.220056152343750000e+02 -1.232500000000000000e+02 4.675000000000000000e+01
5.200000000000000000e+01 1.328630769230768919e+03 5.769000854492187500e+02 7.366333007812500000e+00 0.000000000000000000e+00 0.000000000000000000e+00 3.474540771484375000e+03 2.615198135375976562e+00 4.000000000000000000e+00 1.456142883300781250e+02 -1.227500000000000000e+02 4.675000000000000000e+01
4.700000000000000000e+01 1.933915384615384937e+03 6.518492431640625000e+02 6.220336914062500000e+00 0.000000000000000000e+00 0.000000000000000000e+00 3.188230468750000000e+03 2.191069841384887695e+00 4.000000000000000000e+00 1.464969970703125000e+03 -1.217500000000000000e+02 4.675000000000000000e+01
6.500000000000000000e+01 1.261730769230769283e+03 5.915612182617187500e+02 6.038085937500000000e+00 0.000000000000000000e+00 0.000000000000000000e+00 3.164535400390625000e+03 2.136609077453613281e+00 4.000000000000000000e+00 1.450888061523437500e+03 -1.212500000000000000e+02 4.675000000000000000e+01
5.000000000000000000e+00 3.409769230769228443e+02 3.522915649414062500e+02 5.855804443359375000e+00 0.000000000000000000e+00 2.352941185235977173e-01 3.140840576171875000e+03 3.421410799026489258e+00 1.000000000000000000e+00 7.815430297851562500e+02 -1.207500000000000000e+02 4.675000000000000000e+01
2.000000000000000000e+00 1.418000000000000114e+02 1.462447052001953125e+02 5.673553466796875000e+00 0.000000000000000000e+00 0.000000000000000000e+00 3.117145751953125000e+03 2.201986312866210938e+00 1.000000000000000000e+00 7.077813720703125000e+02 -1.202500000000000000e+02 4.675000000000000000e+01
0.000000000000000000e+00 1.328384615384615586e+02 1.109687500000000000e+02 5.459136962890625000e+00 0.000000000000000000e+00 8.235294222831726074e-01 3.075937744140625000e+03 3.020125389099121094e+00 1.000000000000000000e+00 3.454535522460937500e+02 -1.197500000000000000e+02 4.675000000000000000e+01
0.000000000000000000e+00 2.470999999999999659e+02 1.397449188232421875e+02 4.965911865234375000e+00 0.000000000000000000e+00 1.117647051811218262e+00 2.958496582031250000e+03 2.448948144912719727e+00 1.000000000000000000e+00 3.816527099609375000e+02 -1.187500000000000000e+02 4.675000000000000000e+01
2.000000000000000000e+00 3.235384615384616041e+02 2.013815307617187500e+02 4.719299316406250000e+00 0.000000000000000000e+00 9.411764740943908691e-01 2.899775878906250000e+03 2.321405410766601562e+00 1.000000000000000000e+00 3.687482299804687500e+02 -1.182500000000000000e+02 4.675000000000000000e+01
4.000000000000000000e+00 3.755923076923076565e+02 2.687929992675781250e+02 4.303222656250000000e+00 0.000000000000000000e+00 2.941176593303680420e-01 2.809367919921875000e+03 4.232812881469726562e+00 1.000000000000000000e+00 4.982291870117187500e+02 -1.177500000000000000e+02 4.675000000000000000e+01
4.000000000000000000e+00 4.684923076923074063e+02 3.070949401855468750e+02 3.830657958984375000e+00 0.000000000000000000e+00 2.294117689132690430e+00 2.708397705078125000e+03 4.184012889862060547e+00 1.000000000000000000e+00 7.544389648437500000e+02 -1.172500000000000000e+02 4.675000000000000000e+01
2.700000000000000000e+01 6.416615384615381572e+02 4.482746276855468750e+02 3.358093261718750000e+00 0.000000000000000000e+00 1.176470637321472168e+00 2.607427246093750000e+03 3.398924112319946289e+00 3.000000000000000000e+00 8.367127685546875000e+02 -1.167500000000000000e+02 4.675000000000000000e+01
5.800000000000000000e+01 7.876615384615386120e+02 5.567056884765625000e+02 2.885498046875000000e+00 0.000000000000000000e+00 0.000000000000000000e+00 2.506457031250000000e+03 2.529758691787719727e+00 4.000000000000000000e+00 9.097172241210937500e+02 -1.162500000000000000e+02 4.675000000000000000e+01
3.300000000000000000e+01 7.879307692307695561e+02 6.319589233398437500e+02 2.378723144531250000e+00 0.000000000000000000e+00 2.352941185235977173e-01 2.418593017578125000e+03 2.347678899765014648e+00 3.000000000000000000e+00 1.179509033203125000e+03 -1.157500000000000000e+02 4.675000000000000000e+01
6.300000000000000000e+01 6.098307692307688512e+02 6.505554809570312500e+02 1.871948242187500000e+00 0.000000000000000000e+00 6.470588445663452148e-01 2.330729248046875000e+03 2.192387819290161133e+00 4.000000000000000000e+00 1.544061889648437500e+03 -1.152500000000000000e+02 4.675000000000000000e+01
6.400000000000000000e+01 4.475307692307693515e+02 5.653915405273437500e+02 1.365173339843750000e+00 0.000000000000000000e+00 7.058823704719543457e-01 2.242865478515625000e+03 2.118382930755615234e+00 4.000000000000000000e+00 1.863791870117187500e+03 -1.147500000000000000e+02 4.675000000000000000e+01
2.900000000000000000e+01 3.965000000000002842e+02 3.213984069824218750e+02 9.601440429687500000e-01 0.000000000000000000e+00 2.352941185235977173e-01 2.178938232421875000e+03 2.207187652587890625e+00 3.000000000000000000e+00 1.409171508789062500e+03 -1.142500000000000000e+02 4.675000000000000000e+01
4.200000000000000000e+01 3.207307692307691696e+02 3.111162109375000000e+02 8.604125976562500000e-01 0.000000000000000000e+00 5.294117927551269531e-01 2.186821533203125000e+03 2.213903188705444336e+00 3.000000000000000000e+00 1.353255493164062500e+03 -1.137500000000000000e+02 4.675000000000000000e+01
3.300000000000000000e+01 2.888692307692307395e+02 3.077062683105468750e+02 7.606811523437500000e-01 0.000000000000000000e+00 4.117647111415863037e-01 2.194704589843750000e+03 2.327782392501831055e+00 3.000000000000000000e+00 1.587174438476562500e+03 -1.132500000000000000e+02 4.675000000000000000e+01
7.000000000000000000e+00 3.199923076923075769e+02 3.239222106933593750e+02 6.609191894531250000e-01 0.000000000000000000e+00 2.352941185235977173e-01 2.202587890625000000e+03 2.389403104782104492e+00 1.000000000000000000e+00 1.546779052734375000e+03 -1.127500000000000000e+02 4.675000000000000000e+01
4.000000000000000000e+00 3.153846153846155858e+02 2.999081115722656250e+02 7.891845703125000000e-01 0.000000000000000000e+00 4.705882370471954346e-01 2.250194824218750000e+03 2.345552682876586914e+00 1.000000000000000000e+00 1.518470214843750000e+03 -1.122500000000000000e+02 4.675000000000000000e+01
4.200000000000000000e+01 3.460000000000002274e+02 2.569897155761718750e+02 1.145477294921875000e+00 0.000000000000000000e+00 8.235294222831726074e-01 2.337525878906250000e+03 2.788992643356323242e+00 3.000000000000000000e+00 1.482309692382812500e+03 -1.117500000000000000e+02 4.675000000000000000e+01
2.000000000000000000e+00 3.729076923076924004e+02 3.602467651367187500e+02 1.501739501953125000e+00 0.000000000000000000e+00 2.352941185235977173e-01 2.424856933593750000e+03 2.873927116394042969e+00 1.000000000000000000e+00 1.570304809570312500e+03 -1.112500000000000000e+02 4.675000000000000000e+01
7.000000000000000000e+00 3.777076923076922412e+02 2.712533569335937500e+02 2.882202148437500000e+00 0.000000000000000000e+00 8.823529481887817383e-01 2.766246093750000000e+03 3.308242559432983398e+00 1.000000000000000000e+00 1.379353515625000000e+03 -1.097500000000000000e+02 4.675000000000000000e+01
1.100000000000000000e+01 3.488307692307690786e+02 1.861326446533203125e+02 3.950897216796875000e+00 0.000000000000000000e+00 3.529411852359771729e-01 3.031646484375000000e+03 3.582795143127441406e+00 3.000000000000000000e+00 1.215498535156250000e+03 -1.087500000000000000e+02 4.675000000000000000e+01
1.000000000000000000e+00 3.290999999999997954e+02 1.699135894775390625e+02 4.250610351562500000e+00 0.000000000000000000e+00 4.117647111415863037e-01 3.129307128906250000e+03 3.828811645507812500e+00 1.000000000000000000e+00 9.686076049804687500e+02 -1.082500000000000000e+02 4.675000000000000000e+01
2.000000000000000000e+00 3.289384615384615245e+02 1.792972564697265625e+02 4.550354003906250000e+00 0.000000000000000000e+00 0.000000000000000000e+00 3.226967773437500000e+03 2.915812492370605469e+00 1.000000000000000000e+00 9.114133300781250000e+02 -1.077500000000000000e+02 4.675000000000000000e+01
0.000000000000000000e+00 3.308384615384614449e+02 1.712577819824218750e+02 4.850067138671875000e+00 0.000000000000000000e+00 0.000000000000000000e+00 3.324628173828125000e+03 2.046703577041625977e+00 1.000000000000000000e+00 8.980895385742187500e+02 -1.072500000000000000e+02 4.675000000000000000e+01
1.000000000000000000e+00 3.269000000000001478e+02 1.527278594970703125e+02 5.051544189453125000e+00 0.000000000000000000e+00 2.352941185235977173e-01 3.400289306640625000e+03 2.047773122787475586e+00 1.000000000000000000e+00 8.838076782226562500e+02 -1.067500000000000000e+02 4.675000000000000000e+01
0.000000000000000000e+00 3.293923076923080089e+02 1.409511108398437500e+02 4.958221435546875000e+00 0.000000000000000000e+00 0.000000000000000000e+00 3.409952392578125000e+03 2.228572368621826172e+00 1.000000000000000000e+00 8.735794677734375000e+02 -1.062500000000000000e+02 4.675000000000000000e+01
3.000000000000000000e+00 3.728461538461538680e+02 1.415375823974609375e+02 4.864898681640625000e+00 0.000000000000000000e+00 0.000000000000000000e+00 3.419615234375000000e+03 2.142149925231933594e+00 1.000000000000000000e+00 8.525288696289062500e+02 -1.057500000000000000e+02 4.675000000000000000e+01
1.000000000000000000e+00 4.425615384615384187e+02 1.563963775634765625e+02 4.771606445312500000e+00 0.000000000000000000e+00 2.352941185235977173e-01 3.429278320312500000e+03 3.393479108810424805e+00 1.000000000000000000e+00 7.587098999023437500e+02 -1.052500000000000000e+02 4.675000000000000000e+01
4.000000000000000000e+00 4.498846153846159268e+02 1.644709930419921875e+02 4.609985351562500000e+00 0.000000000000000000e+00 5.882353186607360840e-01 3.419268554687500000e+03 3.848288774490356445e+00 1.000000000000000000e+00 7.565676879882812500e+02 -1.047500000000000000e+02 4.675000000000000000e+01
4.000000000000000000e+00 4.120307692307693515e+02 1.790699005126953125e+02 4.380035400390625000e+00 0.000000000000000000e+00 0.000000000000000000e+00 3.389586181640625000e+03 3.793369770050048828e+00 1.000000000000000000e+00 9.012271118164062500e+02 -1.042500000000000000e+02 4.675000000000000000e+01
5.000000000000000000e+00 3.838923076923077247e+02 1.802990417480468750e+02 4.150085449218750000e+00 0.000000000000000000e+00 7.058823704719543457e-01 3.359903808593750000e+03 3.757860183715820312e+00 1.000000000000000000e+00 8.257086181640625000e+02 -1.037500000000000000e+02 4.675000000000000000e+01
4.000000000000000000e+00 3.713153846153844597e+02 1.702406768798828125e+02 3.920135498046875000e+00 0.000000000000000000e+00 2.941176593303680420e-01 3.330221435546875000e+03 3.745823144912719727e+00 1.000000000000000000e+00 8.341164550781250000e+02 -1.032500000000000000e+02 4.675000000000000000e+01
5.000000000000000000e+00 3.841846153846155403e+02 1.786345520019531250e+02 3.792449951171875000e+00 0.000000000000000000e+00 2.941176593303680420e-01 3.315535400390625000e+03 3.737932920455932617e+00 1.000000000000000000e+00 7.718795776367187500e+02 -1.027500000000000000e+02 4.675000000000000000e+01
5.000000000000000000e+00 3.652846153846155062e+02 1.797136230468750000e+02 3.698822021484375000e+00 0.000000000000000000e+00 2.352941185235977173e-01 3.305848388671875000e+03 3.734920501708984375e+00 1.000000000000000000e+00 7.026195068359375000e+02 -1.022500000000000000e+02 4.675000000000000000e+01
4.000000000000000000e+00 4.099846153846153243e+02 1.770519866943359375e+02 3.605194091796875000e+00 0.000000000000000000e+00 0.000000000000000000e+00 3.296161132812500000e+03 3.742575407028198242e+00 1.000000000000000000e+00 6.885114746093750000e+02 -1.017500000000000000e+02 4.675000000000000000e+01
6.000000000000000000e+00 4.574307692307691013e+02 2.048464202880859375e+02 3.511596679687500000e+00 0.000000000000000000e+00 0.000000000000000000e+00 3.286474121093750000e+03 3.720828771591186523e+00 1.000000000000000000e+00 6.171341552734375000e+02 -1.012500000000000000e+02 4.675000000000000000e+01
5.000000000000000000e+00 4.837769230769232536e+02 2.180747985839843750e+02 3.579589843750000000e+00 0.000000000000000000e+00 0.000000000000000000e+00 3.300136474609375000e+03 3.711968660354614258e+00 1.000000000000000000e+00 5.092751770019531250e+02 -1.007500000000000000e+02 4.675000000000000000e+01
3.100000000000000000e+01 6.684692307692309896e+02 3.276938171386718750e+02 3.008819580078125000e+00 0.000000000000000000e+00 0.000000000000000000e+00 3.185925781250000000e+03 3.738199949264526367e+00 3.000000000000000000e+00 4.519400024414062500e+02 -9.525000000000000000e+01 4.675000000000000000e+01
4.500000000000000000e+01 7.046923076923077360e+02 2.922017211914062500e+02 2.716461181640625000e+00 0.000000000000000000e+00 0.000000000000000000e+00 3.116756347656250000e+03 3.785373687744140625e+00 4.000000000000000000e+00 4.173846130371093750e+02 -9.425000000000000000e+01 4.675000000000000000e+01
4.600000000000000000e+01 6.825923076923077133e+02 2.883411865234375000e+02 2.570281982421875000e+00 0.000000000000000000e+00 0.000000000000000000e+00 3.082171630859375000e+03 3.760119438171386719e+00 4.000000000000000000e+00 4.008521728515625000e+02 -9.375000000000000000e+01 4.675000000000000000e+01
4.900000000000000000e+01 6.992461538461539021e+02 3.352330322265625000e+02 2.593750000000000000e+00 0.000000000000000000e+00 0.000000000000000000e+00 3.058227050781250000e+03 3.673784017562866211e+00 4.000000000000000000e+00 4.038409423828125000e+02 -9.275000000000000000e+01 4.675000000000000000e+01
4.100000000000000000e+01 7.446384615384614563e+02 3.300095520019531250e+02 2.605468750000000000e+00 0.000000000000000000e+00 0.000000000000000000e+00 3.046254882812500000e+03 3.606956243515014648e+00 3.000000000000000000e+00 3.908229370117187500e+02 -9.225000000000000000e+01 4.675000000000000000e+01
5.800000000000000000e+01 7.347769230769227988e+02 4.130571289062500000e+02 3.930297851562500000e+00 0.000000000000000000e+00 0.000000000000000000e+00 3.139449218750000000e+03 9.117667675018310547e-01 4.000000000000000000e+00 2.640792541503906250e+02 -8.925000000000000000e+01 4.675000000000000000e+01
4.900000000000000000e+01 7.280923076923080544e+02 4.067303161621093750e+02 4.132080078125000000e+00 0.000000000000000000e+00 0.000000000000000000e+00 3.121290527343750000e+03 9.058809280395507812e-01 4.000000000000000000e+00 2.686966857910156250e+02 -8.875000000000000000e+01 4.675000000000000000e+01
6.700000000000000000e+01 9.690461538461539703e+02 4.328831787109375000e+02 2.970458984375000000e+00 0.000000000000000000e+00 2.352941185235977173e-01 2.841294433593750000e+03 8.825674057006835938e-01 4.000000000000000000e+00 3.655201110839843750e+02 -8.375000000000000000e+01 4.675000000000000000e+01
6.900000000000000000e+01 9.164076923076916046e+02 4.158787231445312500e+02 2.662506103515625000e+00 0.000000000000000000e+00 2.941176593303680420e-01 2.814278076171875000e+03 8.899357914924621582e-01 4.000000000000000000e+00 4.521817932128906250e+02 -8.325000000000000000e+01 4.675000000000000000e+01
6.600000000000000000e+01 8.785153846153850736e+02 4.012279968261718750e+02 2.354553222656250000e+00 0.000000000000000000e+00 5.294117927551269531e-01 2.787261718750000000e+03 8.852728605270385742e-01 4.000000000000000000e+00 4.447933654785156250e+02 -8.275000000000000000e+01 4.675000000000000000e+01
5.400000000000000000e+01 8.611538461538465299e+02 4.027811889648437500e+02 2.106048583984375000e+00 0.000000000000000000e+00 0.000000000000000000e+00 2.767356201171875000e+03 8.864263892173767090e-01 4.000000000000000000e+00 4.695720825195312500e+02 -8.225000000000000000e+01 4.675000000000000000e+01
6.800000000000000000e+01 8.128384615384615017e+02 4.367919311523437500e+02 1.727874755859375000e+00 0.000000000000000000e+00 0.000000000000000000e+00 2.741767333984375000e+03 1.117929935455322266e+00 4.000000000000000000e+00 4.045057678222656250e+02 -8.125000000000000000e+01 4.675000000000000000e+01
5.700000000000000000e+01 8.405923076923073722e+02 4.677199707031250000e+02 1.463745117187500000e+00 0.000000000000000000e+00 0.000000000000000000e+00 2.715852539062500000e+03 9.184846282005310059e-01 4.000000000000000000e+00 3.155139770507812500e+02 -8.025000000000000000e+01 4.675000000000000000e+01
6.200000000000000000e+01 8.931000000000003638e+02 4.712270202636718750e+02 1.426727294921875000e+00 0.000000000000000000e+00 0.000000000000000000e+00 2.702623779296875000e+03 9.096713662147521973e-01 4.000000000000000000e+00 2.987721557617187500e+02 -7.975000000000000000e+01 4.675000000000000000e+01
6.900000000000000000e+01 9.214461538461545160e+02 4.907064514160156250e+02 1.389709472656250000e+00 0.000000000000000000e+00 0.000000000000000000e+00 2.689394775390625000e+03 9.118303060531616211e-01 4.000000000000000000e+00 3.305902099609375000e+02 -7.925000000000000000e+01 4.675000000000000000e+01
6.000000000000000000e+01 9.635461538461532882e+02 4.880732116699218750e+02 1.352691650390625000e+00 0.000000000000000000e+00 0.000000000000000000e+00 2.676166015625000000e+03 8.984312415122985840e-01 4.000000000000000000e+00 3.049370117187500000e+02 -7.875000000000000000e+01 4.675000000000000000e+01
6.900000000000000000e+01 9.318692307692306258e+02 4.693503723144531250e+02 1.391296386718750000e+00 0.000000000000000000e+00 0.000000000000000000e+00 2.659817626953125000e+03 8.927317857742309570e-01 4.000000000000000000e+00 3.582673339843750000e+02 -7.825000000000000000e+01 4.675000000000000000e+01
6.900000000000000000e+01 9.144999999999998863e+02 4.355164489746093750e+02 1.429870605468750000e+00 0.000000000000000000e+00 0.000000000000000000e+00 2.643469238281250000e+03 8.949347138404846191e-01 4.000000000000000000e+00 3.617947998046875000e+02 -7.775000000000000000e+01 4.675000000000000000e+01
6.900000000000000000e+01 9.227692307692303757e+02 4.271776123046875000e+02 1.468475341796875000e+00 0.000000000000000000e+00 0.000000000000000000e+00 2.627120849609375000e+03 8.940969705581665039e-01 4.000000000000000000e+00 3.711219177246093750e+02 -7.725000000000000000e+01 4.675000000000000000e+01
5.800000000000000000e+01 9.438615384615376342e+02 4.856557617187500000e+02 1.459716796875000000e+00 0.000000000000000000e+00 0.000000000000000000e+00 2.585633300781250000e+03 8.893709182739257812e-01 4.000000000000000000e+00 2.651846923828125000e+02 -7.625000000000000000e+01 4.675000000000000000e+01
5.200000000000000000e+01 1.073792307692308214e+03 5.254863891601562500e+02 1.399414062500000000e+00 0.000000000000000000e+00 0.000000000000000000e+00 2.538870849609375000e+03 8.806145191192626953e-01 4.000000000000000000e+00 3.045661010742187500e+02 -7.525000000000000000e+01 4.675000000000000000e+01
4.800000000000000000e+01 9.884461538461540613e+02 5.388836669921875000e+02 1.329589843750000000e+00 0.000000000000000000e+00 0.000000000000000000e+00 2.515255371093750000e+03 8.776153922080993652e-01 4.000000000000000000e+00 4.685829162597656250e+02 -7.475000000000000000e+01 4.675000000000000000e+01
6.600000000000000000e+01 9.488000000000000682e+02 5.406483154296875000e+02 1.220123291015625000e+00 0.000000000000000000e+00 0.000000000000000000e+00 2.491405517578125000e+03 8.745907545089721680e-01 4.000000000000000000e+00 5.654186401367187500e+02 -7.425000000000000000e+01 4.675000000000000000e+01
6.000000000000000000e+01 8.979846153846157222e+02 5.190686645507812500e+02 1.110626220703125000e+00 0.000000000000000000e+00 0.000000000000000000e+00 2.467555908203125000e+03 8.745860457420349121e-01 4.000000000000000000e+00 4.318895874023437500e+02 -7.375000000000000000e+01 4.675000000000000000e+01
6.400000000000000000e+01 1.018176923076922890e+03 4.773358459472656250e+02 1.001159667968750000e+00 0.000000000000000000e+00 0.000000000000000000e+00 2.443706054687500000e+03 8.760065436363220215e-01 4.000000000000000000e+00 3.847901306152343750e+02 -7.325000000000000000e+01 4.675000000000000000e+01
6.600000000000000000e+01 1.142976923076922958e+03 4.758912353515625000e+02 8.994140625000000000e-01 0.000000000000000000e+00 0.000000000000000000e+00 2.429198974609375000e+03 8.778076171875000000e-01 4.000000000000000000e+00 2.019501953125000000e+02 -7.275000000000000000e+01 4.675000000000000000e+01
6.600000000000000000e+01 1.207384615384616609e+03 4.993207702636718750e+02 6.148376464843750000e-01 0.000000000000000000e+00 0.000000000000000000e+00 2.419132324218750000e+03 8.665437698364257812e-01 4.000000000000000000e+00 5.514144287109375000e+02 -7.025000000000000000e+01 4.675000000000000000e+01
6.500000000000000000e+01 1.058792307692307986e+03 5.000729980468750000e+02 6.213073730468750000e-01 0.000000000000000000e+00 0.000000000000000000e+00 2.431188476562500000e+03 8.714303970336914062e-01 4.000000000000000000e+00 3.356127929687500000e+02 -6.975000000000000000e+01 4.675000000000000000e+01
6.800000000000000000e+01 1.073930769230769329e+03 5.192227172851562500e+02 6.737060546875000000e-01 0.000000000000000000e+00 0.000000000000000000e+00 2.449066406250000000e+03 8.746020197868347168e-01 4.000000000000000000e+00 3.294878845214843750e+02 -6.925000000000000000e+01 4.675000000000000000e+01
6.500000000000000000e+01 1.097538461538461206e+03 5.209962768554687500e+02 8.638000488281250000e-01 0.000000000000000000e+00 0.000000000000000000e+00 2.484409179687500000e+03 8.783323168754577637e-01 4.000000000000000000e+00 2.988483581542968750e+02 -6.875000000000000000e+01 4.675000000000000000e+01
6.700000000000000000e+01 1.070507692307692423e+03 5.021197509765625000e+02 1.053894042968750000e+00 0.000000000000000000e+00 0.000000000000000000e+00 2.519751953125000000e+03 1.936533093452453613e+00 4.000000000000000000e+00 2.072113342285156250e+02 -6.825000000000000000e+01 4.675000000000000000e+01
4.000000000000000000e+01 1.206023076923076360e+03 4.939739379882812500e+02 1.243988037109375000e+00 0.000000000000000000e+00 0.000000000000000000e+00 2.555094726562500000e+03 1.957767486572265625e+00 3.000000000000000000e+00 1.703232879638671875e+02 -6.775000000000000000e+01 4.675000000000000000e+01
4.200000000000000000e+01 1.231400000000000091e+03 5.112060852050781250e+02 1.530609130859375000e+00 0.000000000000000000e+00 0.000000000000000000e+00 2.592951171875000000e+03 8.693246245384216309e-01 3.000000000000000000e+00 3.545072631835937500e+02 -6.725000000000000000e+01 4.675000000000000000e+01
5.000000000000000000e+01 1.263753846153846098e+03 5.146528930664062500e+02 1.913787841796875000e+00 0.000000000000000000e+00 0.000000000000000000e+00 2.633321289062500000e+03 8.592669963836669922e-01 4.000000000000000000e+00 4.314564514160156250e+02 -6.675000000000000000e+01 4.675000000000000000e+01
4.700000000000000000e+01 1.258607692307692787e+03 4.833648071289062500e+02 2.296966552734375000e+00 0.000000000000000000e+00 0.000000000000000000e+00 2.673691406250000000e+03 2.161656618118286133e+00 4.000000000000000000e+00 1.586210479736328125e+02 -6.625000000000000000e+01 4.675000000000000000e+01
4.200000000000000000e+01 1.222330769230769647e+03 4.400264587402343750e+02 2.680175781250000000e+00 0.000000000000000000e+00 0.000000000000000000e+00 2.714061523437500000e+03 2.206472158432006836e+00 3.000000000000000000e+00 5.892361068725585938e+01 -6.575000000000000000e+01 4.675000000000000000e+01
5.000000000000000000e+01 1.289930769230769783e+03 4.446097412109375000e+02 3.089630126953125000e+00 0.000000000000000000e+00 0.000000000000000000e+00 2.680614990234375000e+03 2.233688831329345703e+00 4.000000000000000000e+00 6.647561645507812500e+01 -6.525000000000000000e+01 4.675000000000000000e+01
5.200000000000000000e+01 2.747192307692306713e+03 6.649823608398437500e+02 7.964294433593750000e+00 0.000000000000000000e+00 0.000000000000000000e+00 3.561778808593750000e+03 2.604146242141723633e+00 4.000000000000000000e+00 1.907066955566406250e+02 -1.237500000000000000e+02 4.725000000000000000e+01
6.600000000000000000e+01 1.751176923076924368e+03 6.522858886718750000e+02 7.363342285156250000e+00 0.000000000000000000e+00 0.000000000000000000e+00 3.415091796875000000e+03 2.633734941482543945e+00 4.000000000000000000e+00 1.300086517333984375e+02 -1.232500000000000000e+02 4.725000000000000000e+01
1.000000000000000000e+01 1.038938461538461524e+03 5.505698242187500000e+02 6.161468505859375000e+00 0.000000000000000000e+00 0.000000000000000000e+00 3.121717773437500000e+03 2.743133783340454102e+00 3.000000000000000000e+00 1.048763580322265625e+02 -1.222500000000000000e+02 4.725000000000000000e+01
6.900000000000000000e+01 2.229884615384615245e+03 6.413749389648437500e+02 5.659545898437500000e+00 0.000000000000000000e+00 0.000000000000000000e+00 3.006158203125000000e+03 2.513885498046875000e+00 4.000000000000000000e+00 6.134566040039062500e+02 -1.217500000000000000e+02 4.725000000000000000e+01
6.100000000000000000e+01 1.435684615384616563e+03 6.553176879882812500e+02 5.454711914062500000e+00 0.000000000000000000e+00 8.235294222831726074e-01 2.983980224609375000e+03 2.280065298080444336e+00 4.000000000000000000e+00 9.901130371093750000e+02 -1.212500000000000000e+02 4.725000000000000000e+01
6.100000000000000000e+01 5.932615384615385210e+02 4.861933593750000000e+02 5.249908447265625000e+00 0.000000000000000000e+00 7.058823704719543457e-01 2.961802246093750000e+03 2.531803131103515625e+00 4.000000000000000000e+00 1.067108276367187500e+03 -1.207500000000000000e+02 4.725000000000000000e+01
2.400000000000000000e+01 2.362846153846154493e+02 2.461626892089843750e+02 5.045074462890625000e+00 0.000000000000000000e+00 4.705882370471954346e-01 2.939624267578125000e+03 2.178804636001586914e+00 3.000000000000000000e+00 1.238186401367187500e+03 -1.202500000000000000e+02 4.725000000000000000e+01
1.000000000000000000e+00 2.094999999999999432e+02 1.371409149169921875e+02 4.311431884765625000e+00 0.000000000000000000e+00 9.411764740943908691e-01 2.794249511718750000e+03 2.357105016708374023e+00 1.000000000000000000e+00 5.214158935546875000e+02 -1.187500000000000000e+02 4.725000000000000000e+01
2.000000000000000000e+00 2.583384615384616723e+02 1.906089019775390625e+02 4.058929443359375000e+00 0.000000000000000000e+00 0.000000000000000000e+00 2.740535156250000000e+03 2.240097999572753906e+00 1.000000000000000000e+00 5.874266967773437500e+02 -1.182500000000000000e+02 4.725000000000000000e+01
5.000000000000000000e+00 3.668846153846153584e+02 2.492277526855468750e+02 3.666992187500000000e+00 0.000000000000000000e+00 0.000000000000000000e+00 2.662634277343750000e+03 3.578679084777832031e+00 1.000000000000000000e+00 6.706182861328125000e+02 -1.177500000000000000e+02 4.725000000000000000e+01
8.000000000000000000e+00 5.127384615384614790e+02 3.123017272949218750e+02 3.228576660156250000e+00 0.000000000000000000e+00 4.705882370471954346e-01 2.576671142578125000e+03 3.963455915451049805e+00 1.000000000000000000e+00 7.544638061523437500e+02 -1.172500000000000000e+02 4.725000000000000000e+01
4.100000000000000000e+01 7.392769230769232536e+02 4.548070983886718750e+02 2.790161132812500000e+00 0.000000000000000000e+00 1.117647051811218262e+00 2.490708007812500000e+03 2.770161628723144531e+00 3.000000000000000000e+00 9.471166992187500000e+02 -1.167500000000000000e+02 4.725000000000000000e+01
3.200000000000000000e+01 9.409153846153847098e+02 5.644319458007812500e+02 2.351745605468750000e+00 0.000000000000000000e+00 2.352941185235977173e-01 2.404744628906250000e+03 2.333306550979614258e+00 3.000000000000000000e+00 9.718350830078125000e+02 -1.162500000000000000e+02 4.725000000000000000e+01
6.000000000000000000e+01 8.879230769230772466e+02 6.306071777343750000e+02 1.976318359375000000e+00 0.000000000000000000e+00 2.352941185235977173e-01 2.343325927734375000e+03 2.221303462982177734e+00 4.000000000000000000e+00 1.170162231445312500e+03 -1.157500000000000000e+02 4.725000000000000000e+01
5.900000000000000000e+01 6.645846153846154039e+02 5.165820312500000000e+02 1.600860595703125000e+00 0.000000000000000000e+00 0.000000000000000000e+00 2.281907226562500000e+03 2.164935111999511719e+00 4.000000000000000000e+00 1.389032836914062500e+03 -1.152500000000000000e+02 4.725000000000000000e+01
4.100000000000000000e+01 4.889384615384618087e+02 4.194403991699218750e+02 1.225433349609375000e+00 0.000000000000000000e+00 5.882353186607360840e-01 2.220488281250000000e+03 2.604472160339355469e+00 3.000000000000000000e+00 1.643805786132812500e+03 -1.147500000000000000e+02 4.725000000000000000e+01
4.200000000000000000e+01 3.787846153846154493e+02 3.525540771484375000e+02 9.432983398437500000e-01 0.000000000000000000e+00 6.470588445663452148e-01 2.180686767578125000e+03 3.386330842971801758e+00 3.000000000000000000e+00 9.955653686523437500e+02 -1.142500000000000000e+02 4.725000000000000000e+01
5.300000000000000000e+01 3.595307692307692946e+02 4.770409240722656250e+02 9.410705566406250000e-01 0.000000000000000000e+00 5.294117927551269531e-01 2.205737060546875000e+03 2.113864421844482422e+00 4.000000000000000000e+00 1.945607910156250000e+03 -1.137500000000000000e+02 4.725000000000000000e+01
2.900000000000000000e+01 3.607538461538463253e+02 4.162661437988281250e+02 9.388427734375000000e-01 9.999999776482582092e-03 1.117647051811218262e+00 2.230787109375000000e+03 2.098239660263061523e+00 3.000000000000000000e+00 1.995251464843750000e+03 -1.132500000000000000e+02 4.725000000000000000e+01
6.000000000000000000e+00 3.121230769230768942e+02 2.833214721679687500e+02 1.125091552734375000e+00 0.000000000000000000e+00 2.941176593303680420e-01 2.316707275390625000e+03 3.375539064407348633e+00 1.000000000000000000e+00 1.304160888671875000e+03 -1.122500000000000000e+02 4.725000000000000000e+01
2.000000000000000000e+00 3.747307692307693969e+02 1.927749023437500000e+02 1.504211425781250000e+00 0.000000000000000000e+00 5.882352963089942932e-02 2.413396728515625000e+03 3.650040626525878906e+00 1.000000000000000000e+00 1.130923583984375000e+03 -1.117500000000000000e+02 4.725000000000000000e+01
6.000000000000000000e+00 3.611846153846153697e+02 2.068322753906250000e+02 1.883361816406250000e+00 0.000000000000000000e+00 2.941176593303680420e-01 2.510086181640625000e+03 2.956548929214477539e+00 1.000000000000000000e+00 1.291713134765625000e+03 -1.112500000000000000e+02 4.725000000000000000e+01
9.000000000000000000e+00 3.516692307692309214e+02 2.688227233886718750e+02 2.262481689453125000e+00 0.000000000000000000e+00 0.000000000000000000e+00 2.606775634765625000e+03 3.404820203781127930e+00 1.000000000000000000e+00 1.366420410156250000e+03 -1.107500000000000000e+02 4.725000000000000000e+01
1.000000000000000000e+00 3.510692307692307850e+02 2.497813568115234375e+02 2.707092285156250000e+00 0.000000000000000000e+00 0.000000000000000000e+00 2.722212402343750000e+03 3.648334503173828125e+00 1.000000000000000000e+00 1.237072753906250000e+03 -1.102500000000000000e+02 4.725000000000000000e+01
1.100000000000000000e+01 3.662615384615382936e+02 2.104776000976562500e+02 3.173553466796875000e+00 0.000000000000000000e+00 6.470588445663452148e-01 2.843898437500000000e+03 3.691893100738525391e+00 3.000000000000000000e+00 1.086061889648437500e+03 -1.097500000000000000e+02 4.725000000000000000e+01
9.000000000000000000e+00 3.821384615384616268e+02 2.012837371826171875e+02 3.640014648437500000e+00 0.000000000000000000e+00 0.000000000000000000e+00 2.965584472656250000e+03 3.682274580001831055e+00 1.000000000000000000e+00 1.402520385742187500e+03 -1.092500000000000000e+02 4.725000000000000000e+01
7.000000000000000000e+00 3.480846153846155744e+02 1.821169891357421875e+02 4.106475830078125000e+00 0.000000000000000000e+00 5.882352963089942932e-02 3.087270507812500000e+03 3.783382654190063477e+00 1.000000000000000000e+00 9.809133300781250000e+02 -1.087500000000000000e+02 4.725000000000000000e+01
1.200000000000000000e+01 3.188153846153846303e+02 1.632760620117187500e+02 4.304901123046875000e+00 0.000000000000000000e+00 5.882352963089942932e-02 3.161798339843750000e+03 3.860487461090087891e+00 3.000000000000000000e+00 8.582817993164062500e+02 -1.082500000000000000e+02 4.725000000000000000e+01
5.000000000000000000e+00 3.123538461538461206e+02 1.634889831542968750e+02 4.503356933593750000e+00 0.000000000000000000e+00 7.647058963775634766e-01 3.236326171875000000e+03 3.049580335617065430e+00 1.000000000000000000e+00 8.612691650390625000e+02 -1.077500000000000000e+02 4.725000000000000000e+01
4.000000000000000000e+00 3.152076923076923549e+02 1.600846710205078125e+02 4.701782226562500000e+00 0.000000000000000000e+00 3.529411852359771729e-01 3.310853759765625000e+03 2.146009922027587891e+00 1.000000000000000000e+00 8.902537231445312500e+02 -1.072500000000000000e+02 4.725000000000000000e+01
1.000000000000000000e+00 3.210615384615383618e+02 1.453527526855468750e+02 4.812225341796875000e+00 0.000000000000000000e+00 2.941176593303680420e-01 3.365359375000000000e+03 2.037675857543945312e+00 1.000000000000000000e+00 8.225985107421875000e+02 -1.067500000000000000e+02 4.725000000000000000e+01
2.000000000000000000e+00 3.380538461538462798e+02 1.394691467285156250e+02 4.658691406250000000e+00 0.000000000000000000e+00 0.000000000000000000e+00 3.359798583984375000e+03 3.689341545104980469e+00 1.000000000000000000e+00 7.772671508789062500e+02 -1.062500000000000000e+02 4.725000000000000000e+01
0.000000000000000000e+00 3.777076923076922981e+02 1.424101562500000000e+02 4.505157470703125000e+00 0.000000000000000000e+00 2.941176593303680420e-01 3.354238037109375000e+03 3.876015424728393555e+00 1.000000000000000000e+00 8.265492553710937500e+02 -1.057500000000000000e+02 4.725000000000000000e+01
4.000000000000000000e+00 3.983692307692307395e+02 1.485694274902343750e+02 4.351623535156250000e+00 0.000000000000000000e+00 0.000000000000000000e+00 3.348677246093750000e+03 3.856363296508789062e+00 1.000000000000000000e+00 8.823294677734375000e+02 -1.052500000000000000e+02 4.725000000000000000e+01
3.000000000000000000e+00 3.740461538461540840e+02 1.523598632812500000e+02 4.153076171875000000e+00 0.000000000000000000e+00 2.941176593303680420e-01 3.329728759765625000e+03 3.834473133087158203e+00 1.000000000000000000e+00 7.463109130859375000e+02 -1.047500000000000000e+02 4.725000000000000000e+01
5.000000000000000000e+00 3.715076923076924800e+02 1.680107116699218750e+02 3.909545898437500000e+00 0.000000000000000000e+00 0.000000000000000000e+00 3.297392822265625000e+03 3.798341035842895508e+00 1.000000000000000000e+00 7.249975585937500000e+02 -1.042500000000000000e+02 4.725000000000000000e+01
1.000000000000000000e+00 3.805615384615384755e+02 1.794918823242187500e+02 3.665985107421875000e+00 0.000000000000000000e+00 0.000000000000000000e+00 3.265056884765625000e+03 3.779207944869995117e+00 1.000000000000000000e+00 6.872074584960937500e+02 -1.037500000000000000e+02 4.725000000000000000e+01
4.000000000000000000e+00 3.974615384615385096e+02 1.874999847412109375e+02 3.422454833984375000e+00 0.000000000000000000e+00 2.941176593303680420e-01 3.232720947265625000e+03 3.756290674209594727e+00 1.000000000000000000e+00 8.024483642578125000e+02 -1.032500000000000000e+02 4.725000000000000000e+01
6.000000000000000000e+00 3.898076923076920366e+02 1.914196319580078125e+02 3.304168701171875000e+00 0.000000000000000000e+00 0.000000000000000000e+00 3.219239990234375000e+03 3.749397993087768555e+00 1.000000000000000000e+00 6.916053466796875000e+02 -1.027500000000000000e+02 4.725000000000000000e+01
4.000000000000000000e+00 4.048615384615384301e+02 1.962992553710937500e+02 3.227661132812500000e+00 0.000000000000000000e+00 0.000000000000000000e+00 3.212044433593750000e+03 3.747205018997192383e+00 1.000000000000000000e+00 6.655668334960937500e+02 -1.022500000000000000e+02 4.725000000000000000e+01
4.000000000000000000e+00 4.369307692307692150e+02 2.021855316162109375e+02 3.151123046875000000e+00 0.000000000000000000e+00 5.882352963089942932e-02 3.204848632812500000e+03 3.714246749877929688e+00 1.000000000000000000e+00 5.952271118164062500e+02 -1.017500000000000000e+02 4.725000000000000000e+01
4.000000000000000000e+00 5.285769230769230944e+02 2.473729858398437500e+02 3.304229736328125000e+00 0.000000000000000000e+00 6.470588445663452148e-01 3.240760986328125000e+03 3.648505687713623047e+00 1.000000000000000000e+00 5.601644897460937500e+02 -9.975000000000000000e+01 4.725000000000000000e+01
4.000000000000000000e+00 5.944538461538463707e+02 2.899802551269531250e+02 3.260314941406250000e+00 0.000000000000000000e+00 1.470588207244873047e+00 3.229199462890625000e+03 3.773653268814086914e+00 1.000000000000000000e+00 2.971401672363281250e+02 -9.725000000000000000e+01 4.725000000000000000e+01
6.000000000000000000e+00 6.257000000000000455e+02 2.808263854980468750e+02 3.071807861328125000e+00 0.000000000000000000e+00 8.235294222831726074e-01 3.193948242187500000e+03 3.809137582778930664e+00 1.000000000000000000e+00 2.653315124511718750e+02 -9.675000000000000000e+01 4.725000000000000000e+01
1.500000000000000000e+01 6.545538461538460524e+02 3.037971191406250000e+02 2.694824218750000000e+00 0.000000000000000000e+00 1.352941155433654785e+00 3.123446044921875000e+03 3.708456039428710938e+00 3.000000000000000000e+00 4.435945129394531250e+02 -9.575000000000000000e+01 4.725000000000000000e+01
6.000000000000000000e+01 6.735384615384616609e+02 3.310973205566406250e+02 2.532562255859375000e+00 0.000000000000000000e+00 0.000000000000000000e+00 3.087895507812500000e+03 3.689295530319213867e+00 4.000000000000000000e+00 4.684996643066406250e+02 -9.525000000000000000e+01 4.725000000000000000e+01
2.200000000000000000e+01 7.102615384615387484e+02 2.804486083984375000e+02 2.072082519531250000e+00 0.000000000000000000e+00 0.000000000000000000e+00 2.980944335937500000e+03 3.642541170120239258e+00 3.000000000000000000e+00 3.934663085937500000e+02 -9.375000000000000000e+01 4.725000000000000000e+01
4.300000000000000000e+01 7.093846153846154721e+02 2.958728332519531250e+02 2.078948974609375000e+00 0.000000000000000000e+00 0.000000000000000000e+00 2.965956787109375000e+03 3.634264945983886719e+00 3.000000000000000000e+00 4.081806030273437500e+02 -9.325000000000000000e+01 4.725000000000000000e+01
4.900000000000000000e+01 7.032615384615384073e+02 3.018532409667968750e+02 2.085815429687500000e+00 0.000000000000000000e+00 0.000000000000000000e+00 2.950969238281250000e+03 3.581420898437500000e+00 4.000000000000000000e+00 3.958314819335937500e+02 -9.275000000000000000e+01 4.725000000000000000e+01
5.500000000000000000e+01 7.531307692307691468e+02 3.306109008789062500e+02 2.092651367187500000e+00 0.000000000000000000e+00 0.000000000000000000e+00 2.935981689453125000e+03 3.231262683868408203e+00 4.000000000000000000e+00 4.340141906738281250e+02 -9.225000000000000000e+01 4.725000000000000000e+01
6.100000000000000000e+01 1.044669230769230808e+03 4.357940979003906250e+02 2.536437988281250000e+00 0.000000000000000000e+00 0.000000000000000000e+00 2.747424072265625000e+03 8.644177317619323730e-01 4.000000000000000000e+00 5.079204101562500000e+02 -8.425000000000000000e+01 4.725000000000000000e+01
6.200000000000000000e+01 1.010361538461538657e+03 4.179232482910156250e+02 2.233978271484375000e+00 0.000000000000000000e+00 5.882352963089942932e-02 2.721814697265625000e+03 8.551677465438842773e-01 4.000000000000000000e+00 4.875455017089843750e+02 -8.375000000000000000e+01 4.725000000000000000e+01
5.700000000000000000e+01 9.385307692307688967e+02 4.078136291503906250e+02 1.931488037109375000e+00 0.000000000000000000e+00 0.000000000000000000e+00 2.696205322265625000e+03 8.591765165328979492e-01 4.000000000000000000e+00 5.041035766601562500e+02 -8.325000000000000000e+01 4.725000000000000000e+01
6.000000000000000000e+01 8.782999999999997272e+02 4.050295104980468750e+02 1.628997802734375000e+00 0.000000000000000000e+00 0.000000000000000000e+00 2.670595947265625000e+03 8.685788512229919434e-01 4.000000000000000000e+00 4.754668579101562500e+02 -8.275000000000000000e+01 4.725000000000000000e+01
5.700000000000000000e+01 8.124461538461538339e+02 4.140960998535156250e+02 1.392578125000000000e+00 0.000000000000000000e+00 0.000000000000000000e+00 2.652083984375000000e+03 8.792620897293090820e-01 4.000000000000000000e+00 4.404003601074218750e+02 -8.225000000000000000e+01 4.725000000000000000e+01
6.600000000000000000e+01 8.529461538461538339e+02 4.332727050781250000e+02 1.051910400390625000e+00 0.000000000000000000e+00 0.000000000000000000e+00 2.629255126953125000e+03 8.813276886940002441e-01 4.000000000000000000e+00 3.977248840332031250e+02 -8.125000000000000000e+01 4.725000000000000000e+01
6.400000000000000000e+01 8.348846153846158131e+02 4.129641418457031250e+02 8.815612792968750000e-01 0.000000000000000000e+00 0.000000000000000000e+00 2.617840820312500000e+03 8.939359188079833984e-01 4.000000000000000000e+00 4.101879882812500000e+02 -8.075000000000000000e+01 4.725000000000000000e+01
5.100000000000000000e+01 8.128538461538462343e+02 3.465453186035156250e+02 7.962036132812500000e-01 0.000000000000000000e+00 0.000000000000000000e+00 2.594106933593750000e+03 8.893766999244689941e-01 4.000000000000000000e+00 3.486355590820312500e+02 -7.975000000000000000e+01 4.725000000000000000e+01
5.600000000000000000e+01 8.597769230769232536e+02 3.836114501953125000e+02 7.717895507812500000e-01 0.000000000000000000e+00 0.000000000000000000e+00 2.582175537109375000e+03 8.913440704345703125e-01 4.000000000000000000e+00 2.873645324707031250e+02 -7.925000000000000000e+01 4.725000000000000000e+01
6.700000000000000000e+01 9.006307692307692605e+02 4.513585205078125000e+02 8.367614746093750000e-01 0.000000000000000000e+00 0.000000000000000000e+00 2.538529541015625000e+03 8.713122010231018066e-01 4.000000000000000000e+00 3.855780639648437500e+02 -7.775000000000000000e+01 4.725000000000000000e+01
6.700000000000000000e+01 9.143615384615385437e+02 4.696389465332031250e+02 9.099426269531250000e-01 0.000000000000000000e+00 0.000000000000000000e+00 2.505026367187500000e+03 8.673999905586242676e-01 4.000000000000000000e+00 3.683796386718750000e+02 -7.675000000000000000e+01 4.725000000000000000e+01
6.400000000000000000e+01 9.447769230769229125e+02 4.909011840820312500e+02 8.897399902343750000e-01 0.000000000000000000e+00 0.000000000000000000e+00 2.482014892578125000e+03 8.614479303359985352e-01 4.000000000000000000e+00 4.209559631347656250e+02 -7.625000000000000000e+01 4.725000000000000000e+01
7.200000000000000000e+01 9.800846153846151765e+02 5.049811096191406250e+02 8.695373535156250000e-01 0.000000000000000000e+00 0.000000000000000000e+00 2.459003173828125000e+03 8.586788773536682129e-01 4.000000000000000000e+00 3.890644226074218750e+02 -7.575000000000000000e+01 4.725000000000000000e+01
7.000000000000000000e+01 1.007123076923077178e+03 5.121181640625000000e+02 8.493041992187500000e-01 0.000000000000000000e+00 0.000000000000000000e+00 2.435991455078125000e+03 8.547609448432922363e-01 4.000000000000000000e+00 4.071577148437500000e+02 -7.525000000000000000e+01 4.725000000000000000e+01
4.100000000000000000e+01 9.730538461538460524e+02 5.143192138671875000e+02 7.924194335937500000e-01 0.000000000000000000e+00 0.000000000000000000e+00 2.413423828125000000e+03 8.563928604125976562e-01 3.000000000000000000e+00 3.960454101562500000e+02 -7.475000000000000000e+01 4.725000000000000000e+01
6.400000000000000000e+01 9.274230769230764508e+02 5.041289978027343750e+02 6.988220214843750000e-01 0.000000000000000000e+00 0.000000000000000000e+00 2.391300292968750000e+03 8.587362766265869141e-01 4.000000000000000000e+00 4.463867797851562500e+02 -7.425000000000000000e+01 4.725000000000000000e+01
4.900000000000000000e+01 9.696461538461537657e+02 4.399957275390625000e+02 5.116271972656250000e-01 0.000000000000000000e+00 0.000000000000000000e+00 2.347053222656250000e+03 8.642186522483825684e-01 4.000000000000000000e+00 4.327992248535156250e+02 -7.325000000000000000e+01 4.725000000000000000e+01
6.800000000000000000e+01 1.171684615384614744e+03 4.368004455566406250e+02 3.402709960937500000e-01 0.000000000000000000e+00 0.000000000000000000e+00 2.322759277343750000e+03 8.510531187057495117e-01 4.000000000000000000e+00 3.783077697753906250e+02 -7.225000000000000000e+01 4.725000000000000000e+01
6.900000000000000000e+01 1.405961538461538794e+03 4.194351806640625000e+02 2.557373046875000000e-01 0.000000000000000000e+00 0.000000000000000000e+00 2.312037597656250000e+03 8.666385412216186523e-01 4.000000000000000000e+00 6.371687011718750000e+02 -7.175000000000000000e+01 4.725000000000000000e+01
6.500000000000000000e+01 1.516692307692307168e+03 4.642279663085937500e+02 1.712036132812500000e-01 0.000000000000000000e+00 0.000000000000000000e+00 2.301315673828125000e+03 1.458536028861999512e+00 4.000000000000000000e+00 7.069932861328125000e+02 -7.125000000000000000e+01 4.725000000000000000e+01
6.000000000000000000e+01 1.068992307692308032e+03 5.042595520019531250e+02 2.120971679687500000e-01 0.000000000000000000e+00 0.000000000000000000e+00 2.334805175781250000e+03 8.628196716308593750e-01 4.000000000000000000e+00 4.391430358886718750e+02 -6.975000000000000000e+01 4.725000000000000000e+01
4.400000000000000000e+01 1.091561538461538476e+03 4.795522155761718750e+02 2.700805664062500000e-01 0.000000000000000000e+00 0.000000000000000000e+00 2.351626464843750000e+03 8.640120625495910645e-01 3.000000000000000000e+00 2.346651763916015625e+02 -6.925000000000000000e+01 4.725000000000000000e+01
7.100000000000000000e+01 1.105092307692307713e+03 5.009942626953125000e+02 4.610900878906250000e-01 0.000000000000000000e+00 0.000000000000000000e+00 2.385421875000000000e+03 8.686634898185729980e-01 4.000000000000000000e+00 2.138042907714843750e+02 -6.875000000000000000e+01 4.725000000000000000e+01
4.500000000000000000e+01 1.183815384615384573e+03 5.125113525390625000e+02 6.520996093750000000e-01 0.000000000000000000e+00 0.000000000000000000e+00 2.419217285156250000e+03 8.714690208435058594e-01 4.000000000000000000e+00 2.268648529052734375e+02 -6.825000000000000000e+01 4.725000000000000000e+01
5.300000000000000000e+01 1.188453846153845916e+03 5.187390136718750000e+02 8.431091308593750000e-01 0.000000000000000000e+00 0.000000000000000000e+00 2.453012939453125000e+03 8.615052700042724609e-01 4.000000000000000000e+00 2.752957763671875000e+02 -6.775000000000000000e+01 4.725000000000000000e+01
6.900000000000000000e+01 1.135869230769230853e+03 5.112964782714843750e+02 1.525146484375000000e+00 0.000000000000000000e+00 0.000000000000000000e+00 2.530219970703125000e+03 9.722833633422851562e-01 4.000000000000000000e+00 5.341102294921875000e+02 -6.675000000000000000e+01 4.725000000000000000e+01
6.700000000000000000e+01 1.149669230769231035e+03 4.513184814453125000e+02 1.916168212890625000e+00 0.000000000000000000e+00 0.000000000000000000e+00 2.570426513671875000e+03 1.132181882858276367e+00 4.000000000000000000e+00 4.215828247070312500e+02 -6.625000000000000000e+01 4.725000000000000000e+01
7.000000000000000000e+01 1.126253846153846780e+03 4.049521484375000000e+02 2.307159423828125000e+00 0.000000000000000000e+00 0.000000000000000000e+00 2.610632812500000000e+03 1.971025943756103516e+00 4.000000000000000000e+00 1.119939270019531250e+02 -6.575000000000000000e+01 4.725000000000000000e+01
5.800000000000000000e+01 1.381523076923077724e+03 5.982340698242187500e+02 5.068115234375000000e+00 0.000000000000000000e+00 0.000000000000000000e+00 2.257604492187500000e+03 1.473722338676452637e+00 4.000000000000000000e+00 1.174912033081054688e+02 -5.325000000000000000e+01 4.725000000000000000e+01
2.100000000000000000e+01 2.690192307692308077e+03 6.543631591796875000e+02 7.304656982421875000e+00 0.000000000000000000e+00 2.941176593303680420e-01 3.328574951171875000e+03 2.423252105712890625e+00 3.000000000000000000e+00 1.167061767578125000e+03 -1.237500000000000000e+02 4.775000000000000000e+01
2.200000000000000000e+01 1.891569230769231353e+03 6.379893188476562500e+02 6.731567382812500000e+00 0.000000000000000000e+00 0.000000000000000000e+00 3.195421875000000000e+03 2.428784847259521484e+00 3.000000000000000000e+00 1.264101440429687500e+03 -1.232500000000000000e+02 4.775000000000000000e+01
7.200000000000000000e+01 1.798653846153846189e+03 6.569544067382812500e+02 5.098785400390625000e+00 0.000000000000000000e+00 0.000000000000000000e+00 2.824085937500000000e+03 2.530384063720703125e+00 4.000000000000000000e+00 6.242059936523437500e+02 -1.217500000000000000e+02 4.775000000000000000e+01
7.200000000000000000e+01 1.496515384615385756e+03 6.805657958984375000e+02 4.871368408203125000e+00 0.000000000000000000e+00 0.000000000000000000e+00 2.803425048828125000e+03 2.165550708770751953e+00 4.000000000000000000e+00 1.125538452148437500e+03 -1.212500000000000000e+02 4.775000000000000000e+01
3.300000000000000000e+01 8.922615384615382936e+02 5.274717407226562500e+02 4.643981933593750000e+00 0.000000000000000000e+00 1.117647051811218262e+00 2.782763916015625000e+03 2.149273633956909180e+00 3.000000000000000000e+00 8.717946166992187500e+02 -1.207500000000000000e+02 4.775000000000000000e+01
2.000000000000000000e+00 3.711307692307692037e+02 3.052067871093750000e+02 4.416564941406250000e+00 0.000000000000000000e+00 1.176470637321472168e+00 2.762103027343750000e+03 3.080788135528564453e+00 1.000000000000000000e+00 6.272610473632812500e+02 -1.202500000000000000e+02 4.775000000000000000e+01
3.000000000000000000e+00 1.822076923076922981e+02 1.794528198242187500e+02 4.173675537109375000e+00 0.000000000000000000e+00 1.058823585510253906e+00 2.727418701171875000e+03 2.167985200881958008e+00 1.000000000000000000e+00 7.656343383789062500e+02 -1.197500000000000000e+02 4.775000000000000000e+01
2.000000000000000000e+00 2.284461538461540329e+02 1.742242126464843750e+02 3.656921386718750000e+00 0.000000000000000000e+00 8.823529481887817383e-01 2.630002685546875000e+03 3.925003051757812500e+00 1.000000000000000000e+00 6.742841186523437500e+02 -1.187500000000000000e+02 4.775000000000000000e+01
5.000000000000000000e+00 2.568076923076922071e+02 2.446272888183593750e+02 3.398559570312500000e+00 0.000000000000000000e+00 2.941176593303680420e-01 2.581294677734375000e+03 3.863849401473999023e+00 1.000000000000000000e+00 6.974080810546875000e+02 -1.182500000000000000e+02 4.775000000000000000e+01
2.000000000000000000e+00 5.388615384615383164e+02 3.340618591308593750e+02 2.626525878906250000e+00 0.000000000000000000e+00 0.000000000000000000e+00 2.444944580078125000e+03 3.686061382293701172e+00 1.000000000000000000e+00 6.931889648437500000e+02 -1.172500000000000000e+02 4.775000000000000000e+01
5.000000000000000000e+01 7.491000000000003638e+02 4.037808532714843750e+02 2.222259521484375000e+00 0.000000000000000000e+00 5.294117927551269531e-01 2.373988525390625000e+03 2.396301984786987305e+00 4.000000000000000000e+00 8.314124755859375000e+02 -1.167500000000000000e+02 4.775000000000000000e+01
6.100000000000000000e+01 9.104230769230767919e+02 5.460772094726562500e+02 1.818023681640625000e+00 0.000000000000000000e+00 5.882352963089942932e-02 2.303032470703125000e+03 2.324731349945068359e+00 4.000000000000000000e+00 1.178701782226562500e+03 -1.162500000000000000e+02 4.775000000000000000e+01
6.700000000000000000e+01 8.683153846153844597e+02 5.718823852539062500e+02 1.573913574218750000e+00 0.000000000000000000e+00 5.294117927551269531e-01 2.268058837890625000e+03 2.280663251876831055e+00 4.000000000000000000e+00 1.413295898437500000e+03 -1.157500000000000000e+02 4.775000000000000000e+01
6.400000000000000000e+01 6.325461538461538566e+02 3.865289611816406250e+02 1.329803466796875000e+00 0.000000000000000000e+00 0.000000000000000000e+00 2.233084960937500000e+03 2.209047317504882812e+00 4.000000000000000000e+00 1.738085937500000000e+03 -1.152500000000000000e+02 4.775000000000000000e+01
2.700000000000000000e+01 4.591923076923076223e+02 2.498888854980468750e+02 1.085693359375000000e+00 0.000000000000000000e+00 8.235294222831726074e-01 2.198111328125000000e+03 2.380989313125610352e+00 3.000000000000000000e+00 1.286819946289062500e+03 -1.147500000000000000e+02 4.775000000000000000e+01
4.700000000000000000e+01 4.269538461538459160e+02 5.469240112304687500e+02 1.021759033203125000e+00 0.000000000000000000e+00 0.000000000000000000e+00 2.224652587890625000e+03 2.036402702331542969e+00 4.000000000000000000e+00 1.567904907226562500e+03 -1.137500000000000000e+02 4.775000000000000000e+01
3.000000000000000000e+00 2.935076923076923094e+02 2.171089782714843750e+02 1.460968017578125000e+00 0.000000000000000000e+00 2.941176593303680420e-01 2.383219726562500000e+03 3.588345289230346680e+00 1.000000000000000000e+00 1.221200195312500000e+03 -1.122500000000000000e+02 4.775000000000000000e+01
3.000000000000000000e+00 3.231692307692308077e+02 1.610702514648437500e+02 1.862976074218750000e+00 0.000000000000000000e+00 0.000000000000000000e+00 2.489267578125000000e+03 3.549446105957031250e+00 1.000000000000000000e+00 1.141516357421875000e+03 -1.117500000000000000e+02 4.775000000000000000e+01
1.000000000000000000e+00 3.491615384615383277e+02 1.574191436767578125e+02 2.264953613281250000e+00 0.000000000000000000e+00 5.294117927551269531e-01 2.595315429687500000e+03 2.005425930023193359e+00 1.000000000000000000e+00 1.086936645507812500e+03 -1.112500000000000000e+02 4.775000000000000000e+01
3.000000000000000000e+00 3.492230769230769170e+02 1.744651794433593750e+02 2.666961669921875000e+00 0.000000000000000000e+00 5.882353186607360840e-01 2.701363281250000000e+03 2.569548845291137695e+00 1.000000000000000000e+00 9.292982177734375000e+02 -1.107500000000000000e+02 4.775000000000000000e+01
1.000000000000000000e+00 3.428076923076924345e+02 2.008076171875000000e+02 3.066375732421875000e+00 0.000000000000000000e+00 1.176470637321472168e+00 2.810879150390625000e+03 3.572561740875244141e+00 1.000000000000000000e+00 9.641944580078125000e+02 -1.102500000000000000e+02 4.775000000000000000e+01
1.000000000000000000e+00 3.494923076923074632e+02 2.105758056640625000e+02 3.464935302734375000e+00 0.000000000000000000e+00 5.294117927551269531e-01 2.921551025390625000e+03 2.731773853302001953e+00 1.000000000000000000e+00 9.373961791992187500e+02 -1.097500000000000000e+02 4.775000000000000000e+01
4.000000000000000000e+00 3.638923076923077815e+02 1.919552459716796875e+02 3.863494873046875000e+00 0.000000000000000000e+00 5.294117927551269531e-01 3.032222900390625000e+03 3.700781583786010742e+00 1.000000000000000000e+00 9.303168945312500000e+02 -1.092500000000000000e+02 4.775000000000000000e+01
2.000000000000000000e+00 3.596153846153846416e+02 1.735435333251953125e+02 4.262054443359375000e+00 0.000000000000000000e+00 2.941176593303680420e-01 3.142894531250000000e+03 3.741994142532348633e+00 1.000000000000000000e+00 9.270890502929687500e+02 -1.087500000000000000e+02 4.775000000000000000e+01
2.000000000000000000e+00 3.193076923076924345e+02 1.708006439208984375e+02 4.359191894531250000e+00 0.000000000000000000e+00 0.000000000000000000e+00 3.194289550781250000e+03 3.801644086837768555e+00 1.000000000000000000e+00 8.615532836914062500e+02 -1.082500000000000000e+02 4.775000000000000000e+01
0.000000000000000000e+00 3.052461538461540158e+02 1.520659942626953125e+02 4.456359863281250000e+00 0.000000000000000000e+00 2.941176593303680420e-01 3.245684570312500000e+03 2.014976263046264648e+00 1.000000000000000000e+00 7.348628540039062500e+02 -1.077500000000000000e+02 4.775000000000000000e+01
4.000000000000000000e+00 3.033692307692307395e+02 1.516272583007812500e+02 4.553497314453125000e+00 0.000000000000000000e+00 5.294117927551269531e-01 3.297079345703125000e+03 2.004074573516845703e+00 1.000000000000000000e+00 8.580634155273437500e+02 -1.072500000000000000e+02 4.775000000000000000e+01
1.000000000000000000e+00 3.643384615384613880e+02 1.374467620849609375e+02 4.145385742187500000e+00 0.000000000000000000e+00 0.000000000000000000e+00 3.288860595703125000e+03 2.908187150955200195e+00 1.000000000000000000e+00 7.522275390625000000e+02 -1.057500000000000000e+02 4.775000000000000000e+01
4.000000000000000000e+00 3.693153846153842323e+02 1.429629058837890625e+02 3.931610107421875000e+00 0.000000000000000000e+00 0.000000000000000000e+00 3.268076171875000000e+03 3.766719818115234375e+00 1.000000000000000000e+00 6.832718505859375000e+02 -1.052500000000000000e+02 4.775000000000000000e+01
0.000000000000000000e+00 3.659230769230768487e+02 1.563957366943359375e+02 3.696166992187500000e+00 0.000000000000000000e+00 0.000000000000000000e+00 3.240189208984375000e+03 3.750203371047973633e+00 1.000000000000000000e+00 7.738627319335937500e+02 -1.047500000000000000e+02 4.775000000000000000e+01
5.000000000000000000e+00 3.695846153846152902e+02 1.633634948730468750e+02 3.439025878906250000e+00 0.000000000000000000e+00 0.000000000000000000e+00 3.205199462890625000e+03 3.736994743347167969e+00 1.000000000000000000e+00 6.843261108398437500e+02 -1.042500000000000000e+02 4.775000000000000000e+01
5.000000000000000000e+00 3.802999999999997840e+02 1.711610107421875000e+02 3.181915283203125000e+00 0.000000000000000000e+00 0.000000000000000000e+00 3.170209960937500000e+03 3.753937721252441406e+00 1.000000000000000000e+00 6.747360839843750000e+02 -1.037500000000000000e+02 4.775000000000000000e+01
6.000000000000000000e+00 3.896384615384614563e+02 1.796125335693359375e+02 2.924774169921875000e+00 0.000000000000000000e+00 0.000000000000000000e+00 3.135220214843750000e+03 3.716789722442626953e+00 1.000000000000000000e+00 6.531287231445312500e+02 -1.032500000000000000e+02 4.775000000000000000e+01
7.000000000000000000e+00 3.850692307692307281e+02 1.732830810546875000e+02 2.815917968750000000e+00 0.000000000000000000e+00 0.000000000000000000e+00 3.122944580078125000e+03 3.689565896987915039e+00 1.000000000000000000e+00 6.831187744140625000e+02 -1.027500000000000000e+02 4.775000000000000000e+01
7.000000000000000000e+00 5.390461538461537430e+02 2.462920227050781250e+02 2.950958251953125000e+00 0.000000000000000000e+00 1.176470592617988586e-01 3.162782714843750000e+03 3.633526086807250977e+00 1.000000000000000000e+00 4.533055114746093750e+02 -9.875000000000000000e+01 4.775000000000000000e+01
5.500000000000000000e+01 6.288461538461538112e+02 2.769833068847656250e+02 2.056335449218750000e+00 0.000000000000000000e+00 3.529411852359771729e-01 2.989865234375000000e+03 3.631845474243164062e+00 4.000000000000000000e+00 3.957941284179687500e+02 -9.525000000000000000e+01 4.775000000000000000e+01
4.900000000000000000e+01 6.702230769230770875e+02 2.818546752929687500e+02 1.895507812500000000e+00 0.000000000000000000e+00 0.000000000000000000e+00 2.953149169921875000e+03 3.640232801437377930e+00 4.000000000000000000e+00 4.087915954589843750e+02 -9.475000000000000000e+01 4.775000000000000000e+01
5.500000000000000000e+01 6.885538461538466208e+02 2.868981933593750000e+02 1.734680175781250000e+00 0.000000000000000000e+00 0.000000000000000000e+00 2.916432861328125000e+03 3.297451972961425781e+00 4.000000000000000000e+00 4.250120849609375000e+02 -9.425000000000000000e+01 4.775000000000000000e+01
6.200000000000000000e+01 7.082230769230770875e+02 2.757444763183593750e+02 1.573852539062500000e+00 0.000000000000000000e+00 0.000000000000000000e+00 2.879716796875000000e+03 3.065925121307373047e+00 4.000000000000000000e+00 4.117576904296875000e+02 -9.375000000000000000e+01 4.775000000000000000e+01
5.400000000000000000e+01 7.210076923076928779e+02 2.795082397460937500e+02 1.575866699218750000e+00 0.000000000000000000e+00 0.000000000000000000e+00 2.861714111328125000e+03 9.306757450103759766e-01 4.000000000000000000e+00 4.182876586914062500e+02 -9.325000000000000000e+01 4.775000000000000000e+01
4.200000000000000000e+01 7.221846153846155403e+02 2.791447753906250000e+02 1.577850341796875000e+00 0.000000000000000000e+00 0.000000000000000000e+00 2.843711425781250000e+03 2.945314407348632812e+00 3.000000000000000000e+00 4.110904235839843750e+02 -9.275000000000000000e+01 4.775000000000000000e+01
4.300000000000000000e+01 7.735538461538460524e+02 3.231615295410156250e+02 1.579833984375000000e+00 0.000000000000000000e+00 0.000000000000000000e+00 2.825708740234375000e+03 1.046831488609313965e+00 3.000000000000000000e+00 4.518666687011718750e+02 -9.225000000000000000e+01 4.775000000000000000e+01
5.500000000000000000e+01 8.099307692307691013e+02 3.381897583007812500e+02 1.638488769531250000e+00 0.000000000000000000e+00 0.000000000000000000e+00 2.816566406250000000e+03 8.715430498123168945e-01 4.000000000000000000e+00 4.539009399414062500e+02 -9.175000000000000000e+01 4.775000000000000000e+01
5.300000000000000000e+01 8.195307692307695788e+02 3.576873779296875000e+02 1.867065429687500000e+00 0.000000000000000000e+00 4.705882370471954346e-01 2.834005615234375000e+03 8.565191030502319336e-01 4.000000000000000000e+00 5.015929870605468750e+02 -9.125000000000000000e+01 4.775000000000000000e+01
5.000000000000000000e+01 9.768846153846156994e+02 3.603787841796875000e+02 1.794464111328125000e+00 0.000000000000000000e+00 0.000000000000000000e+00 2.626537597656250000e+03 8.470058441162109375e-01 4.000000000000000000e+00 4.576498413085937500e+02 -8.425000000000000000e+01 4.775000000000000000e+01
5.200000000000000000e+01 9.597230769230772012e+02 3.880208129882812500e+02 1.497467041015625000e+00 0.000000000000000000e+00 0.000000000000000000e+00 2.602334960937500000e+03 8.421140313148498535e-01 4.000000000000000000e+00 4.691658020019531250e+02 -8.375000000000000000e+01 4.775000000000000000e+01
4.700000000000000000e+01 9.212461538461541295e+02 3.994921875000000000e+02 1.200439453125000000e+00 0.000000000000000000e+00 0.000000000000000000e+00 2.578132568359375000e+03 8.492478728294372559e-01 4.000000000000000000e+00 4.470598754882812500e+02 -8.325000000000000000e+01 4.775000000000000000e+01
4.100000000000000000e+01 8.539461538461536065e+02 4.066480407714843750e+02 9.034118652343750000e-01 0.000000000000000000e+00 0.000000000000000000e+00 2.553930175781250000e+03 8.617883920669555664e-01 3.000000000000000000e+00 4.053765563964843750e+02 -8.275000000000000000e+01 4.775000000000000000e+01
5.700000000000000000e+01 8.388769230769232763e+02 4.242979431152343750e+02 5.275268554687500000e-01 0.000000000000000000e+00 1.176470592617988586e-01 2.526777343750000000e+03 8.642333149909973145e-01 4.000000000000000000e+00 3.866573486328125000e+02 -8.175000000000000000e+01 4.775000000000000000e+01
6.400000000000000000e+01 8.551692307692306940e+02 4.011717834472656250e+02 3.759460449218750000e-01 0.000000000000000000e+00 0.000000000000000000e+00 2.516743164062500000e+03 8.689260482788085938e-01 4.000000000000000000e+00 3.657553100585937500e+02 -8.125000000000000000e+01 4.775000000000000000e+01
5.700000000000000000e+01 8.319307692307688740e+02 3.446793212890625000e+02 2.243652343750000000e-01 0.000000000000000000e+00 0.000000000000000000e+00 2.506708740234375000e+03 8.787941336631774902e-01 4.000000000000000000e+00 3.496452026367187500e+02 -8.075000000000000000e+01 4.775000000000000000e+01
4.900000000000000000e+01 8.264076923076924004e+02 2.664559936523437500e+02 1.775817871093750000e-01 0.000000000000000000e+00 0.000000000000000000e+00 2.496224609375000000e+03 8.826222419738769531e-01 4.000000000000000000e+00 3.043401794433593750e+02 -8.025000000000000000e+01 4.775000000000000000e+01
4.600000000000000000e+01 7.835384615384620020e+02 2.319402770996093750e+02 1.657104492187500000e-01 0.000000000000000000e+00 0.000000000000000000e+00 2.485590332031250000e+03 1.304239869117736816e+00 4.000000000000000000e+00 2.043472747802734375e+02 -7.975000000000000000e+01 4.775000000000000000e+01
6.400000000000000000e+01 9.128076923076927187e+02 4.064908752441406250e+02 1.419677734375000000e-01 0.000000000000000000e+00 0.000000000000000000e+00 2.464321777343750000e+03 8.646889925003051758e-01 4.000000000000000000e+00 2.978438415527343750e+02 -7.875000000000000000e+01 4.775000000000000000e+01
5.500000000000000000e+01 8.903230769230772239e+02 4.593966979980468750e+02 2.436218261718750000e-01 0.000000000000000000e+00 0.000000000000000000e+00 2.433589599609375000e+03 8.507869839668273926e-01 4.000000000000000000e+00 3.342947082519531250e+02 -7.775000000000000000e+01 4.775000000000000000e+01
4.900000000000000000e+01 9.036615384615387256e+02 4.668569641113281250e+02 2.944641113281250000e-01 0.000000000000000000e+00 0.000000000000000000e+00 2.418223632812500000e+03 8.434401154518127441e-01 4.000000000000000000e+00 3.651304931640625000e+02 -7.725000000000000000e+01 4.775000000000000000e+01
3.200000000000000000e+01 9.186846153846156540e+02 4.749416503906250000e+02 3.300170898437500000e-01 0.000000000000000000e+00 0.000000000000000000e+00 2.401038574218750000e+03 8.388383388519287109e-01 3.000000000000000000e+00 3.790294189453125000e+02 -7.675000000000000000e+01 4.775000000000000000e+01
6.500000000000000000e+01 9.352230769230767464e+02 4.928973083496093750e+02 3.094787597656250000e-01 0.000000000000000000e+00 0.000000000000000000e+00 2.355754150390625000e+03 8.420259952545166016e-01 4.000000000000000000e+00 4.417263793945312500e+02 -7.575000000000000000e+01 4.775000000000000000e+01
6.200000000000000000e+01 9.342307692307696243e+02 4.861619262695312500e+02 2.552490234375000000e-01 0.000000000000000000e+00 0.000000000000000000e+00 2.311592285156250000e+03 8.365178704261779785e-01 4.000000000000000000e+00 4.818663024902343750e+02 -7.475000000000000000e+01 4.775000000000000000e+01
6.600000000000000000e+01 9.411923076923077360e+02 4.759267578125000000e+02 1.775207519531250000e-01 0.000000000000000000e+00 5.882353186607360840e-01 2.291194824218750000e+03 8.313346505165100098e-01 4.000000000000000000e+00 5.236082153320312500e+02 -7.425000000000000000e+01 4.775000000000000000e+01
6.100000000000000000e+01 9.665692307692303302e+02 4.627160644531250000e+02 9.979248046875000000e-02 0.000000000000000000e+00 5.882353186607360840e-01 2.270797607421875000e+03 8.330369591712951660e-01 4.000000000000000000e+00 4.762137451171875000e+02 -7.375000000000000000e+01 4.775000000000000000e+01
6.200000000000000000e+01 9.859153846153842551e+02 4.461420288085937500e+02 -4.977416992187500000e-02 0.000000000000000000e+00 5.882352963089942932e-02 2.237762939453125000e+03 8.583158850669860840e-01 4.000000000000000000e+00 3.285252075195312500e+02 -7.275000000000000000e+01 4.775000000000000000e+01
6.100000000000000000e+01 1.082484615384615154e+03 4.646333923339843750e+02 -1.196594238281250000e-01 0.000000000000000000e+00 0.000000000000000000e+00 2.227712402343750000e+03 8.425759077072143555e-01 4.000000000000000000e+00 4.381774291992187500e+02 -7.225000000000000000e+01 4.775000000000000000e+01
6.700000000000000000e+01 1.278784615384614881e+03 5.230244750976562500e+02 -1.895446777343750000e-01 0.000000000000000000e+00 0.000000000000000000e+00 2.217662109375000000e+03 1.243892550468444824e+00 4.000000000000000000e+00 5.428207397460937500e+02 -7.175000000000000000e+01 4.775000000000000000e+01
6.300000000000000000e+01 1.303415384615384710e+03 5.600809326171875000e+02 -2.594299316406250000e-01 9.999999776482582092e-03 0.000000000000000000e+00 2.207611572265625000e+03 1.892581343650817871e+00 4.000000000000000000e+00 8.033743896484375000e+02 -7.125000000000000000e+01 4.775000000000000000e+01
6.300000000000000000e+01 1.360030769230769238e+03 5.550820312500000000e+02 -2.386474609375000000e-01 9.999999776482582092e-03 0.000000000000000000e+00 2.217881835937500000e+03 1.430768847465515137e+00 4.000000000000000000e+00 8.515111083984375000e+02 -7.075000000000000000e+01 4.775000000000000000e+01
6.200000000000000000e+01 1.026223076923077087e+03 5.339988403320312500e+02 -2.178955078125000000e-01 0.000000000000000000e+00 0.000000000000000000e+00 2.228151855468750000e+03 8.193493485450744629e-01 4.000000000000000000e+00 3.814985961914062500e+02 -7.025000000000000000e+01 4.775000000000000000e+01
6.700000000000000000e+01 1.127392307692307213e+03 4.643101196289062500e+02 5.838012695312500000e-02 0.000000000000000000e+00 2.352941185235977173e-01 2.286434814453125000e+03 8.545489907264709473e-01 4.000000000000000000e+00 2.125028533935546875e+02 -6.875000000000000000e+01 4.775000000000000000e+01
5.900000000000000000e+01 1.222253846153845871e+03 4.857517700195312500e+02 2.503051757812500000e-01 0.000000000000000000e+00 0.000000000000000000e+00 2.318682861328125000e+03 8.383757472038269043e-01 4.000000000000000000e+00 4.461314086914062500e+02 -6.825000000000000000e+01 4.775000000000000000e+01
7.300000000000000000e+01 1.214476923076922958e+03 5.099122924804687500e+02 4.422302246093750000e-01 0.000000000000000000e+00 0.000000000000000000e+00 2.350930908203125000e+03 8.261673450469970703e-01 4.000000000000000000e+00 4.123943786621093750e+02 -6.775000000000000000e+01 4.775000000000000000e+01
6.900000000000000000e+01 1.092699999999999591e+03 5.226434936523437500e+02 7.376403808593750000e-01 0.000000000000000000e+00 0.000000000000000000e+00 2.387076171875000000e+03 8.245337009429931641e-01 4.000000000000000000e+00 3.018760375976562500e+02 -6.725000000000000000e+01 4.775000000000000000e+01
2.900000000000000000e+01 1.115076923076923094e+03 5.218125000000000000e+02 1.136474609375000000e+00 0.000000000000000000e+00 0.000000000000000000e+00 2.427118896484375000e+03 8.309354186058044434e-01 3.000000000000000000e+00 2.329541320800781250e+02 -6.675000000000000000e+01 4.775000000000000000e+01
2.100000000000000000e+01 1.467961538461537430e+03 5.093490600585937500e+02 4.296600341796875000e+00 0.000000000000000000e+00 0.000000000000000000e+00 2.262345947265625000e+03 1.836286544799804688e+00 3.000000000000000000e+00 1.876552581787109375e+02 -5.775000000000000000e+01 4.775000000000000000e+01
4.900000000000000000e+01 1.607184615384615199e+03 5.522260742187500000e+02 4.346923828125000000e+00 0.000000000000000000e+00 0.000000000000000000e+00 2.288502929687500000e+03 1.993871450424194336e+00 4.000000000000000000e+00 2.181236419677734375e+02 -5.575000000000000000e+01 4.775000000000000000e+01
1.700000000000000000e+01 1.445769230769230944e+03 5.596926879882812500e+02 4.455688476562500000e+00 0.000000000000000000e+00 0.000000000000000000e+00 2.298582519531250000e+03 1.866452932357788086e+00 3.000000000000000000e+00 2.057682342529296875e+02 -5.475000000000000000e+01 4.775000000000000000e+01
1.800000000000000000e+01 1.024084615384615290e+03 4.954282836914062500e+02 5.009399414062500000e+00 0.000000000000000000e+00 0.000000000000000000e+00 2.736513916015625000e+03 2.621299982070922852e+00 3.000000000000000000e+00 1.225346069335937500e+02 -1.222500000000000000e+02 4.825000000000000000e+01
5.600000000000000000e+01 1.607138461538462252e+03 6.465300292968750000e+02 4.537994384765625000e+00 0.000000000000000000e+00 0.000000000000000000e+00 2.642013671875000000e+03 2.287902832031250000e+00 4.000000000000000000e+00 6.917072143554687500e+02 -1.217500000000000000e+02 4.825000000000000000e+01
6.600000000000000000e+01 1.434707692307692696e+03 6.632219848632812500e+02 4.288024902343750000e+00 0.000000000000000000e+00 0.000000000000000000e+00 2.622869628906250000e+03 1.902901887893676758e+00 4.000000000000000000e+00 1.260719970703125000e+03 -1.212500000000000000e+02 4.825000000000000000e+01
6.100000000000000000e+01 1.039415384615384937e+03 5.912322387695312500e+02 4.038055419921875000e+00 0.000000000000000000e+00 2.941176593303680420e-01 2.603725830078125000e+03 1.828472733497619629e+00 4.000000000000000000e+00 1.930480346679687500e+03 -1.207500000000000000e+02 4.825000000000000000e+01
1.300000000000000000e+01 6.168769230769232763e+02 4.128119812011718750e+02 3.788085937500000000e+00 0.000000000000000000e+00 2.352941185235977173e-01 2.584581787109375000e+03 2.483485221862792969e+00 3.000000000000000000e+00 1.366701171875000000e+03 -1.202500000000000000e+02 4.825000000000000000e+01
1.100000000000000000e+01 3.000538461538460524e+02 2.391500244140625000e+02 3.530975341796875000e+00 0.000000000000000000e+00 9.411764740943908691e-01 2.553158935546875000e+03 3.645439386367797852e+00 3.000000000000000000e+00 4.464180297851562500e+02 -1.197500000000000000e+02 4.825000000000000000e+01
2.000000000000000000e+01 3.318461538461536406e+02 2.291722869873046875e+02 3.266693115234375000e+00 0.000000000000000000e+00 1.000000000000000000e+00 2.509457275390625000e+03 2.979017019271850586e+00 3.000000000000000000e+00 7.884856567382812500e+02 -1.192500000000000000e+02 4.825000000000000000e+01
3.500000000000000000e+01 4.192307692307693969e+02 2.481095428466796875e+02 3.002441406250000000e+00 0.000000000000000000e+00 0.000000000000000000e+00 2.465755615234375000e+03 2.379145383834838867e+00 3.000000000000000000e+00 8.529577636718750000e+02 -1.187500000000000000e+02 4.825000000000000000e+01
9.000000000000000000e+00 5.156692307692305803e+02 2.855602722167968750e+02 2.738189697265625000e+00 0.000000000000000000e+00 5.294117927551269531e-01 2.422053955078125000e+03 2.796204566955566406e+00 1.000000000000000000e+00 6.472263183593750000e+02 -1.182500000000000000e+02 4.825000000000000000e+01
1.000000000000000000e+01 6.236230769230767237e+02 3.619960632324218750e+02 2.394531250000000000e+00 0.000000000000000000e+00 0.000000000000000000e+00 2.369166748046875000e+03 2.251188993453979492e+00 3.000000000000000000e+00 5.493026733398437500e+02 -1.177500000000000000e+02 4.825000000000000000e+01
1.400000000000000000e+01 8.005923076923077133e+02 4.718504943847656250e+02 2.024444580078125000e+00 0.000000000000000000e+00 2.941176593303680420e-01 2.313218017578125000e+03 2.178493976593017578e+00 3.000000000000000000e+00 6.505344848632812500e+02 -1.172500000000000000e+02 4.825000000000000000e+01
4.600000000000000000e+01 8.792384615384615927e+02 5.475258789062500000e+02 1.654357910156250000e+00 0.000000000000000000e+00 5.882352963089942932e-02 2.257269042968750000e+03 2.143380880355834961e+00 4.000000000000000000e+00 8.104053344726562500e+02 -1.167500000000000000e+02 4.825000000000000000e+01
2.900000000000000000e+01 8.326153846153846416e+02 6.143392944335937500e+02 1.284271240234375000e+00 0.000000000000000000e+00 0.000000000000000000e+00 2.201320312500000000e+03 2.108018636703491211e+00 3.000000000000000000e+00 1.347689941406250000e+03 -1.162500000000000000e+02 4.825000000000000000e+01
3.200000000000000000e+01 7.277615384615384073e+02 5.788700561523437500e+02 1.171508789062500000e+00 0.000000000000000000e+00 5.882352963089942932e-02 2.192791503906250000e+03 2.074545383453369141e+00 3.000000000000000000e+00 1.690481811523437500e+03 -1.157500000000000000e+02 4.825000000000000000e+01
3.000000000000000000e+01 5.629538461538460297e+02 4.147561645507812500e+02 1.058746337890625000e+00 0.000000000000000000e+00 5.882352963089942932e-02 2.184262939453125000e+03 2.082011699676513672e+00 3.000000000000000000e+00 9.819221801757812500e+02 -1.152500000000000000e+02 4.825000000000000000e+01
5.500000000000000000e+01 5.081076923076925027e+02 3.376484680175781250e+02 9.459838867187500000e-01 0.000000000000000000e+00 5.294117927551269531e-01 2.175734130859375000e+03 2.068041086196899414e+00 4.000000000000000000e+00 1.597120727539062500e+03 -1.147500000000000000e+02 4.825000000000000000e+01
3.900000000000000000e+01 4.661999999999998749e+02 3.739938659667968750e+02 9.096069335937500000e-01 0.000000000000000000e+00 5.294117927551269531e-01 2.184183837890625000e+03 2.049159288406372070e+00 3.000000000000000000e+00 8.956428222656250000e+02 -1.142500000000000000e+02 4.825000000000000000e+01
6.000000000000000000e+00 5.179615384615383391e+02 5.612882690429687500e+02 1.102416992187500000e+00 0.000000000000000000e+00 7.058823704719543457e-01 2.243568115234375000e+03 1.881184577941894531e+00 1.000000000000000000e+00 1.706566162109375000e+03 -1.137500000000000000e+02 4.825000000000000000e+01
6.300000000000000000e+01 4.495999999999997954e+02 5.585682983398437500e+02 1.295227050781250000e+00 9.999999776482582092e-03 8.235294222831726074e-01 2.302952392578125000e+03 1.910676002502441406e+00 4.000000000000000000e+00 1.936269287109375000e+03 -1.132500000000000000e+02 4.825000000000000000e+01
1.500000000000000000e+01 3.659076923076922299e+02 3.851754455566406250e+02 1.488037109375000000e+00 0.000000000000000000e+00 0.000000000000000000e+00 2.362336669921875000e+03 3.134416580200195312e+00 3.000000000000000000e+00 1.367952514648437500e+03 -1.127500000000000000e+02 4.825000000000000000e+01
0.000000000000000000e+00 3.066769230769230035e+02 1.458037872314453125e+02 2.221710205078125000e+00 0.000000000000000000e+00 3.529411852359771729e-01 2.565138427734375000e+03 3.331521749496459961e+00 1.000000000000000000e+00 1.053211303710937500e+03 -1.117500000000000000e+02 4.825000000000000000e+01
0.000000000000000000e+00 3.357153846153846075e+02 1.346213836669921875e+02 2.646575927734375000e+00 0.000000000000000000e+00 2.941176593303680420e-01 2.680544677734375000e+03 1.967495083808898926e+00 1.000000000000000000e+00 9.306052856445312500e+02 -1.112500000000000000e+02 4.825000000000000000e+01
0.000000000000000000e+00 3.484384615384614108e+02 1.292025299072265625e+02 3.071411132812500000e+00 0.000000000000000000e+00 0.000000000000000000e+00 2.795950927734375000e+03 1.966726064682006836e+00 1.000000000000000000e+00 8.951588745117187500e+02 -1.107500000000000000e+02 4.825000000000000000e+01
4.000000000000000000e+00 3.410692307692306713e+02 1.558511810302734375e+02 3.425628662109375000e+00 0.000000000000000000e+00 2.941176593303680420e-01 2.899545898437500000e+03 2.440476894378662109e+00 1.000000000000000000e+00 8.529976806640625000e+02 -1.102500000000000000e+02 4.825000000000000000e+01
8.000000000000000000e+00 3.475999999999999659e+02 2.163930053710937500e+02 3.756286621093750000e+00 0.000000000000000000e+00 1.176470592617988586e-01 2.999203369140625000e+03 3.103976964950561523e+00 1.000000000000000000e+00 1.227140380859375000e+03 -1.097500000000000000e+02 4.825000000000000000e+01
6.000000000000000000e+00 3.705153846153847894e+02 2.271307830810546875e+02 4.086944580078125000e+00 0.000000000000000000e+00 0.000000000000000000e+00 3.098861083984375000e+03 3.544843912124633789e+00 1.000000000000000000e+00 1.203677246093750000e+03 -1.092500000000000000e+02 4.825000000000000000e+01
6.000000000000000000e+00 3.492923076923077588e+02 1.773542633056640625e+02 4.417602539062500000e+00 0.000000000000000000e+00 7.647058963775634766e-01 3.198518554687500000e+03 3.652403593063354492e+00 1.000000000000000000e+00 8.604135131835937500e+02 -1.087500000000000000e+02 4.825000000000000000e+01
5.000000000000000000e+00 3.250384615384615472e+02 1.647046661376953125e+02 4.413482666015625000e+00 0.000000000000000000e+00 5.882352963089942932e-02 3.226780761718750000e+03 3.712234020233154297e+00 1.000000000000000000e+00 7.793036499023437500e+02 -1.082500000000000000e+02 4.825000000000000000e+01
5.000000000000000000e+00 3.047615384615384073e+02 1.539487609863281250e+02 4.409362792968750000e+00 0.000000000000000000e+00 2.941176593303680420e-01 3.255042968750000000e+03 3.734995365142822266e+00 1.000000000000000000e+00 8.111450195312500000e+02 -1.077500000000000000e+02 4.825000000000000000e+01
5.000000000000000000e+00 3.143384615384615017e+02 1.559536895751953125e+02 4.405212402343750000e+00 0.000000000000000000e+00 2.941176593303680420e-01 3.283305175781250000e+03 2.000949621200561523e+00 1.000000000000000000e+00 7.222207031250000000e+02 -1.072500000000000000e+02 4.825000000000000000e+01
4.000000000000000000e+00 3.455923076923075996e+02 1.425945281982421875e+02 4.059631347656250000e+00 0.000000000000000000e+00 5.882353186607360840e-01 3.259491455078125000e+03 2.636134147644042969e+00 1.000000000000000000e+00 7.961530761718750000e+02 -1.062500000000000000e+02 4.825000000000000000e+01
6.000000000000000000e+00 3.668307692307693060e+02 1.377077178955078125e+02 3.785614013671875000e+00 0.000000000000000000e+00 0.000000000000000000e+00 3.223483398437500000e+03 3.604937553405761719e+00 1.000000000000000000e+00 7.447650146484375000e+02 -1.057500000000000000e+02 4.825000000000000000e+01
1.000000000000000000e+00 3.728615384615385437e+02 1.421646423339843750e+02 3.511627197265625000e+00 0.000000000000000000e+00 7.058823704719543457e-01 3.187475097656250000e+03 3.695061206817626953e+00 1.000000000000000000e+00 7.066214599609375000e+02 -1.052500000000000000e+02 4.825000000000000000e+01
6.000000000000000000e+00 3.708999999999999204e+02 1.572142639160156250e+02 3.239257812500000000e+00 0.000000000000000000e+00 0.000000000000000000e+00 3.150649414062500000e+03 3.704357385635375977e+00 1.000000000000000000e+00 6.042296752929687500e+02 -1.047500000000000000e+02 4.825000000000000000e+01
5.000000000000000000e+00 3.711615384615382709e+02 1.715003662109375000e+02 2.968536376953125000e+00 0.000000000000000000e+00 5.294117927551269531e-01 3.113006103515625000e+03 3.695164203643798828e+00 1.000000000000000000e+00 6.855831909179687500e+02 -1.042500000000000000e+02 4.825000000000000000e+01
1.000000000000000000e+00 3.791692307692307509e+02 1.780281677246093750e+02 2.697814941406250000e+00 0.000000000000000000e+00 2.941176593303680420e-01 3.075362792968750000e+03 3.705839633941650391e+00 1.000000000000000000e+00 6.834567871093750000e+02 -1.037500000000000000e+02 4.825000000000000000e+01
7.000000000000000000e+00 3.940615384615384755e+02 1.871454620361328125e+02 2.327636718750000000e+00 0.000000000000000000e+00 0.000000000000000000e+00 3.026649169921875000e+03 3.637906312942504883e+00 1.000000000000000000e+00 6.682427368164062500e+02 -1.027500000000000000e+02 4.825000000000000000e+01
9.000000000000000000e+00 5.808153846153846871e+02 2.284744873046875000e+02 2.387847900390625000e+00 0.000000000000000000e+00 0.000000000000000000e+00 3.051576660156250000e+03 3.622640132904052734e+00 1.000000000000000000e+00 4.664484252929687500e+02 -1.002500000000000000e+02 4.825000000000000000e+01
5.400000000000000000e+01 6.941769230769228898e+02 2.720036010742187500e+02 1.243804931640625000e+00 0.000000000000000000e+00 0.000000000000000000e+00 2.816271240234375000e+03 9.346514344215393066e-01 4.000000000000000000e+00 3.700046997070312500e+02 -9.425000000000000000e+01 4.825000000000000000e+01
5.800000000000000000e+01 7.060230769230767010e+02 2.905076904296875000e+02 1.075653076171875000e+00 0.000000000000000000e+00 0.000000000000000000e+00 2.778489501953125000e+03 9.319379925727844238e-01 4.000000000000000000e+00 3.648097534179687500e+02 -9.375000000000000000e+01 4.825000000000000000e+01
5.100000000000000000e+01 7.061538461538465299e+02 2.849422912597656250e+02 1.072784423828125000e+00 0.000000000000000000e+00 0.000000000000000000e+00 2.757471435546875000e+03 9.185824990272521973e-01 4.000000000000000000e+00 3.896738891601562500e+02 -9.325000000000000000e+01 4.825000000000000000e+01
5.000000000000000000e+01 7.445769230769235492e+02 2.575751037597656250e+02 1.069915771484375000e+00 0.000000000000000000e+00 0.000000000000000000e+00 2.736453613281250000e+03 9.597800374031066895e-01 4.000000000000000000e+00 4.124656372070312500e+02 -9.275000000000000000e+01 4.825000000000000000e+01
5.700000000000000000e+01 7.898538461538463480e+02 2.839342956542968750e+02 1.067016601562500000e+00 0.000000000000000000e+00 0.000000000000000000e+00 2.715435546875000000e+03 8.828623294830322266e-01 4.000000000000000000e+00 3.771672363281250000e+02 -9.225000000000000000e+01 4.825000000000000000e+01
5.700000000000000000e+01 8.338692307692310806e+02 2.978247070312500000e+02 1.116790771484375000e+00 0.000000000000000000e+00 0.000000000000000000e+00 2.701898193359375000e+03 2.095458269119262695e+00 4.000000000000000000e+00 4.152086486816406250e+02 -9.175000000000000000e+01 4.825000000000000000e+01
5.900000000000000000e+01 8.178076923076924913e+02 2.961388244628906250e+02 1.532318115234375000e+00 0.000000000000000000e+00 2.941176593303680420e-01 2.719706054687500000e+03 1.940888404846191406e+00 4.000000000000000000e+00 4.447554626464843750e+02 -9.075000000000000000e+01 4.825000000000000000e+01
5.400000000000000000e+01 7.930461538461532882e+02 2.955744628906250000e+02 1.740051269531250000e+00 0.000000000000000000e+00 0.000000000000000000e+00 2.728610107421875000e+03 8.448252677917480469e-01 4.000000000000000000e+00 4.892805480957031250e+02 -9.025000000000000000e+01 4.825000000000000000e+01
5.100000000000000000e+01 7.698923076923075541e+02 3.203832092285156250e+02 1.875549316406250000e+00 0.000000000000000000e+00 0.000000000000000000e+00 2.649788085937500000e+03 8.561805486679077148e-01 4.000000000000000000e+00 3.906882019042968750e+02 -8.975000000000000000e+01 4.825000000000000000e+01
6.200000000000000000e+01 9.352923076923078725e+02 3.838340454101562500e+02 1.892578125000000000e+00 0.000000000000000000e+00 0.000000000000000000e+00 2.512354980468750000e+03 1.003752946853637695e+00 4.000000000000000000e+00 4.753412780761718750e+02 -8.575000000000000000e+01 4.825000000000000000e+01
5.400000000000000000e+01 9.354923076923076906e+02 3.595880126953125000e+02 1.613586425781250000e+00 0.000000000000000000e+00 0.000000000000000000e+00 2.511989501953125000e+03 1.389614820480346680e+00 4.000000000000000000e+00 4.522672424316406250e+02 -8.525000000000000000e+01 4.825000000000000000e+01
4.400000000000000000e+01 9.733461538461538112e+02 3.371981506347656250e+02 1.334625244140625000e+00 0.000000000000000000e+00 0.000000000000000000e+00 2.511623779296875000e+03 1.131552338600158691e+00 3.000000000000000000e+00 3.897495117187500000e+02 -8.475000000000000000e+01 4.825000000000000000e+01
6.200000000000000000e+01 9.742230769230767464e+02 3.495855102539062500e+02 1.052490234375000000e+00 0.000000000000000000e+00 0.000000000000000000e+00 2.505650878906250000e+03 8.203519582748413086e-01 4.000000000000000000e+00 3.649282836914062500e+02 -8.425000000000000000e+01 4.825000000000000000e+01
5.800000000000000000e+01 8.992923076923071903e+02 3.817747192382812500e+02 7.609558105468750000e-01 0.000000000000000000e+00 0.000000000000000000e+00 2.482855224609375000e+03 8.217586874961853027e-01 4.000000000000000000e+00 3.962853088378906250e+02 -8.375000000000000000e+01 4.825000000000000000e+01
6.100000000000000000e+01 8.854076923076926278e+02 4.042376708984375000e+02 4.693908691406250000e-01 0.000000000000000000e+00 0.000000000000000000e+00 2.460059814453125000e+03 8.298470377922058105e-01 4.000000000000000000e+00 3.883303222656250000e+02 -8.325000000000000000e+01 4.825000000000000000e+01
4.400000000000000000e+01 8.591461538461534246e+02 4.178525390625000000e+02 1.778564453125000000e-01 0.000000000000000000e+00 0.000000000000000000e+00 2.437264404296875000e+03 8.414035439491271973e-01 3.000000000000000000e+00 3.520365600585937500e+02 -8.275000000000000000e+01 4.825000000000000000e+01
6.600000000000000000e+01 8.305923076923077133e+02 4.373612060546875000e+02 -1.671752929687500000e-01 0.000000000000000000e+00 0.000000000000000000e+00 2.412885253906250000e+03 8.582506179809570312e-01 4.000000000000000000e+00 3.541984252929687500e+02 -8.175000000000000000e+01 4.825000000000000000e+01
2.900000000000000000e+01 8.422538461538453021e+02 4.274512634277343750e+02 -2.999877929687500000e-01 0.000000000000000000e+00 0.000000000000000000e+00 2.404230957031250000e+03 8.676744103431701660e-01 3.000000000000000000e+00 3.217448730468750000e+02 -8.125000000000000000e+01 4.825000000000000000e+01
1.700000000000000000e+01 8.240307692307693515e+02 3.894057312011718750e+02 -4.328308105468750000e-01 0.000000000000000000e+00 3.529411852359771729e-01 2.395576904296875000e+03 8.654832839965820312e-01 3.000000000000000000e+00 3.505063781738281250e+02 -8.075000000000000000e+01 4.825000000000000000e+01
6.000000000000000000e+01 8.372769230769237083e+02 3.411484985351562500e+02 -4.655151367187500000e-01 0.000000000000000000e+00 0.000000000000000000e+00 2.386410644531250000e+03 8.580923676490783691e-01 4.000000000000000000e+00 3.293250427246093750e+02 -8.025000000000000000e+01 4.825000000000000000e+01
4.900000000000000000e+01 8.638230769230766555e+02 3.447168884277343750e+02 -4.648132324218750000e-01 0.000000000000000000e+00 0.000000000000000000e+00 2.377073730468750000e+03 8.535896539688110352e-01 4.000000000000000000e+00 3.167617797851562500e+02 -7.975000000000000000e+01 4.825000000000000000e+01
5.100000000000000000e+01 8.773307692307697607e+02 4.177413635253906250e+02 -4.641113281250000000e-01 0.000000000000000000e+00 0.000000000000000000e+00 2.367736816406250000e+03 8.501995205879211426e-01 4.000000000000000000e+00 3.283214111328125000e+02 -7.925000000000000000e+01 4.825000000000000000e+01
6.200000000000000000e+01 8.655538461538463935e+02 4.594786987304687500e+02 -4.634094238281250000e-01 0.000000000000000000e+00 0.000000000000000000e+00 2.358399902343750000e+03 8.474438786506652832e-01 4.000000000000000000e+00 3.142016601562500000e+02 -7.875000000000000000e+01 4.825000000000000000e+01
6.000000000000000000e+01 9.315461538461543114e+02 4.701307067871093750e+02 -2.925415039062500000e-01 0.000000000000000000e+00 0.000000000000000000e+00 2.313774902343750000e+03 8.354665637016296387e-01 4.000000000000000000e+00 3.386366271972656250e+02 -7.725000000000000000e+01 4.825000000000000000e+01
6.200000000000000000e+01 9.294307692307694424e+02 4.728047790527343750e+02 -2.499084472656250000e-01 0.000000000000000000e+00 0.000000000000000000e+00 2.297050537109375000e+03 8.162196874618530273e-01 4.000000000000000000e+00 3.585451965332031250e+02 -7.675000000000000000e+01 4.825000000000000000e+01
4.800000000000000000e+01 9.510384615384616609e+02 4.826366271972656250e+02 -2.502136230468750000e-01 0.000000000000000000e+00 5.882353186607360840e-01 2.274777832031250000e+03 1.982495665550231934e+00 4.000000000000000000e+00 4.197441711425781250e+02 -7.625000000000000000e+01 4.825000000000000000e+01
5.400000000000000000e+01 9.560307692307694651e+02 4.884004211425781250e+02 -2.505493164062500000e-01 0.000000000000000000e+00 1.176470592617988586e-01 2.252505371093750000e+03 1.596284031867980957e+00 4.000000000000000000e+00 4.361952209472656250e+02 -7.575000000000000000e+01 4.825000000000000000e+01
6.900000000000000000e+01 9.542923076923078725e+02 4.874270935058593750e+02 -2.508544921875000000e-01 0.000000000000000000e+00 0.000000000000000000e+00 2.230232666015625000e+03 1.673174500465393066e+00 4.000000000000000000e+00 4.253572082519531250e+02 -7.525000000000000000e+01 4.825000000000000000e+01
4.400000000000000000e+01 9.550538461538461661e+02 4.788467102050781250e+02 -2.819519042968750000e-01 0.000000000000000000e+00 0.000000000000000000e+00 2.209760742187500000e+03 1.089130163192749023e+00 3.000000000000000000e+00 4.330767822265625000e+02 -7.475000000000000000e+01 4.825000000000000000e+01
5.600000000000000000e+01 9.458384615384613880e+02 4.728385620117187500e+02 -3.437805175781250000e-01 0.000000000000000000e+00 0.000000000000000000e+00 2.191089599609375000e+03 1.314926862716674805e+00 4.000000000000000000e+00 4.692007446289062500e+02 -7.425000000000000000e+01 4.825000000000000000e+01
6.500000000000000000e+01 9.724230769230766782e+02 4.639788208007812500e+02 -4.056396484375000000e-01 9.999999776482582092e-03 0.000000000000000000e+00 2.172418212890625000e+03 1.924251198768615723e+00 4.000000000000000000e+00 5.469418945312500000e+02 -7.375000000000000000e+01 4.825000000000000000e+01
3.200000000000000000e+01 9.450307692307693515e+02 4.519853820800781250e+02 -4.674682617187500000e-01 0.000000000000000000e+00 5.882353186607360840e-01 2.153747070312500000e+03 1.338605046272277832e+00 3.000000000000000000e+00 5.366400756835937500e+02 -7.325000000000000000e+01 4.825000000000000000e+01
6.200000000000000000e+01 9.622692307692306031e+02 4.505471191406250000e+02 -5.243530273437500000e-01 0.000000000000000000e+00 5.294117927551269531e-01 2.142044921875000000e+03 8.277909755706787109e-01 4.000000000000000000e+00 4.724485168457031250e+02 -7.275000000000000000e+01 4.825000000000000000e+01
6.500000000000000000e+01 9.806538461538459615e+02 4.632419128417968750e+02 -5.795898437500000000e-01 0.000000000000000000e+00 0.000000000000000000e+00 2.132665771484375000e+03 8.329255580902099609e-01 4.000000000000000000e+00 3.408696289062500000e+02 -7.225000000000000000e+01 4.825000000000000000e+01
6.800000000000000000e+01 1.089738461538461479e+03 4.775076904296875000e+02 -6.348266601562500000e-01 0.000000000000000000e+00 0.000000000000000000e+00 2.123286621093750000e+03 8.173902630805969238e-01 4.000000000000000000e+00 3.695540771484375000e+02 -7.175000000000000000e+01 4.825000000000000000e+01
6.100000000000000000e+01 1.085699999999999818e+03 4.898060607910156250e+02 -6.900634765625000000e-01 0.000000000000000000e+00 0.000000000000000000e+00 2.113907470703125000e+03 8.191225528717041016e-01 4.000000000000000000e+00 3.328840026855468750e+02 -7.125000000000000000e+01 4.825000000000000000e+01
6.300000000000000000e+01 1.074238461538462161e+03 4.881461791992187500e+02 -6.621398925781250000e-01 0.000000000000000000e+00 0.000000000000000000e+00 2.123284667968750000e+03 8.120300173759460449e-01 4.000000000000000000e+00 2.559029388427734375e+02 -7.075000000000000000e+01 4.825000000000000000e+01
6.100000000000000000e+01 1.163861538461538430e+03 4.790257568359375000e+02 -6.342468261718750000e-01 0.000000000000000000e+00 0.000000000000000000e+00 2.132661621093750000e+03 7.995492219924926758e-01 4.000000000000000000e+00 2.790186157226562500e+02 -7.025000000000000000e+01 4.825000000000000000e+01
4.900000000000000000e+01 1.088330769230769420e+03 4.734266967773437500e+02 -6.063232421875000000e-01 0.000000000000000000e+00 0.000000000000000000e+00 2.142038818359375000e+03 8.283311128616333008e-01 4.000000000000000000e+00 1.893049163818359375e+02 -6.975000000000000000e+01 4.825000000000000000e+01
5.300000000000000000e+01 1.202023076923076587e+03 4.707916564941406250e+02 -1.514892578125000000e-01 0.000000000000000000e+00 0.000000000000000000e+00 2.218148193359375000e+03 8.262496590614318848e-01 4.000000000000000000e+00 3.307704772949218750e+02 -6.825000000000000000e+01 4.825000000000000000e+01
6.600000000000000000e+01 1.223353846153846689e+03 4.924128723144531250e+02 4.138183593750000000e-02 0.000000000000000000e+00 0.000000000000000000e+00 2.248849121093750000e+03 8.194483518600463867e-01 4.000000000000000000e+00 3.514015808105468750e+02 -6.775000000000000000e+01 4.825000000000000000e+01
7.100000000000000000e+01 1.122346153846153584e+03 5.027355346679687500e+02 3.411254882812500000e-01 0.000000000000000000e+00 0.000000000000000000e+00 2.284138916015625000e+03 8.187907338142395020e-01 4.000000000000000000e+00 2.681500244140625000e+02 -6.725000000000000000e+01 4.825000000000000000e+01
7.000000000000000000e+01 1.149999999999999773e+03 5.037157897949218750e+02 7.478332519531250000e-01 0.000000000000000000e+00 0.000000000000000000e+00 2.324017822265625000e+03 8.149830102920532227e-01 4.000000000000000000e+00 4.225621337890625000e+02 -6.675000000000000000e+01 4.825000000000000000e+01
6.900000000000000000e+01 1.145176923076923686e+03 5.139420166015625000e+02 1.154510498046875000e+00 0.000000000000000000e+00 0.000000000000000000e+00 2.363896728515625000e+03 8.372372388839721680e-01 4.000000000000000000e+00 4.232078552246093750e+02 -6.625000000000000000e+01 4.825000000000000000e+01
5.000000000000000000e+01 1.232976923076922731e+03 5.517775878906250000e+02 2.031585693359375000e+00 0.000000000000000000e+00 0.000000000000000000e+00 2.388236572265625000e+03 8.345665335655212402e-01 4.000000000000000000e+00 4.195555114746093750e+02 -6.525000000000000000e+01 4.825000000000000000e+01
1.100000000000000000e+01 1.255276923076924049e+03 5.910411987304687500e+02 3.839111328125000000e+00 0.000000000000000000e+00 0.000000000000000000e+00 2.215623046875000000e+03 1.812077283859252930e+00 3.000000000000000000e+00 4.696336364746093750e+02 -5.825000000000000000e+01 4.825000000000000000e+01
4.700000000000000000e+01 1.315015384615384619e+03 5.789090576171875000e+02 3.777160644531250000e+00 0.000000000000000000e+00 0.000000000000000000e+00 2.220153808593750000e+03 1.814526915550231934e+00 4.000000000000000000e+00 3.627439270019531250e+02 -5.775000000000000000e+01 4.825000000000000000e+01
2.200000000000000000e+01 1.278523076923077497e+03 5.729507446289062500e+02 3.764129638671875000e+00 0.000000000000000000e+00 0.000000000000000000e+00 2.227177001953125000e+03 1.887472867965698242e+00 3.000000000000000000e+00 3.640198669433593750e+02 -5.725000000000000000e+01 4.825000000000000000e+01
3.500000000000000000e+01 1.358600000000000136e+03 5.763348388671875000e+02 3.738067626953125000e+00 0.000000000000000000e+00 0.000000000000000000e+00 2.241223388671875000e+03 1.939140796661376953e+00 3.000000000000000000e+00 2.714124145507812500e+02 -5.625000000000000000e+01 4.825000000000000000e+01
3.600000000000000000e+01 1.401799999999999727e+03 5.735719604492187500e+02 3.803314208984375000e+00 0.000000000000000000e+00 0.000000000000000000e+00 2.246427490234375000e+03 1.993491291999816895e+00 3.000000000000000000e+00 2.343341522216796875e+02 -5.575000000000000000e+01 4.825000000000000000e+01
2.000000000000000000e+01 1.396123076923076496e+03 5.737103881835937500e+02 3.868560791015625000e+00 0.000000000000000000e+00 0.000000000000000000e+00 2.251631591796875000e+03 1.712655782699584961e+00 3.000000000000000000e+00 2.352932434082031250e+02 -5.525000000000000000e+01 4.825000000000000000e+01
4.000000000000000000e+01 1.276923076923076451e+03 5.816057739257812500e+02 4.005767822265625000e+00 0.000000000000000000e+00 0.000000000000000000e+00 2.242748779296875000e+03 8.136433362960815430e-01 3.000000000000000000e+00 1.302368621826171875e+02 -5.425000000000000000e+01 4.825000000000000000e+01
7.300000000000000000e+01 2.386946153846154175e+03 5.091925659179687500e+02 6.222991943359375000e+00 0.000000000000000000e+00 0.000000000000000000e+00 2.877277832031250000e+03 2.392634868621826172e+00 4.000000000000000000e+00 6.748864746093750000e+02 -1.242500000000000000e+02 4.875000000000000000e+01
6.300000000000000000e+01 1.501699999999999591e+03 4.537833251953125000e+02 5.492340087890625000e+00 0.000000000000000000e+00 0.000000000000000000e+00 2.745518066406250000e+03 2.494972229003906250e+00 4.000000000000000000e+00 9.346152496337890625e+01 -1.237500000000000000e+02 4.875000000000000000e+01
3.700000000000000000e+01 1.373669230769230808e+03 5.786579589843750000e+02 4.078796386718750000e+00 0.000000000000000000e+00 0.000000000000000000e+00 2.488346679687500000e+03 2.460196733474731445e+00 3.000000000000000000e+00 3.786283569335937500e+02 -1.222500000000000000e+02 4.875000000000000000e+01
5.400000000000000000e+01 1.704453846153846825e+03 6.518605346679687500e+02 3.658996582031250000e+00 0.000000000000000000e+00 0.000000000000000000e+00 2.419837890625000000e+03 2.071027517318725586e+00 4.000000000000000000e+00 1.167385131835937500e+03 -1.217500000000000000e+02 4.875000000000000000e+01
5.900000000000000000e+01 1.423561538461539158e+03 6.472657470703125000e+02 3.393371582031250000e+00 0.000000000000000000e+00 0.000000000000000000e+00 2.402973632812500000e+03 1.781570911407470703e+00 4.000000000000000000e+00 1.523854614257812500e+03 -1.212500000000000000e+02 4.875000000000000000e+01
1.400000000000000000e+01 1.057884615384615472e+03 5.897041015625000000e+02 3.127746582031250000e+00 9.999999776482582092e-03 5.882352963089942932e-02 2.386109130859375000e+03 1.671416401863098145e+00 3.000000000000000000e+00 1.443607055664062500e+03 -1.207500000000000000e+02 4.875000000000000000e+01
3.000000000000000000e+00 7.511000000000005912e+02 4.398077392578125000e+02 2.862091064453125000e+00 9.999999776482582092e-03 1.176470637321472168e+00 2.369244873046875000e+03 1.758455514907836914e+00 1.000000000000000000e+00 1.883041870117187500e+03 -1.202500000000000000e+02 4.875000000000000000e+01
6.000000000000000000e+01 4.405615384615388166e+02 2.610590209960937500e+02 2.594360351562500000e+00 0.000000000000000000e+00 8.235294222831726074e-01 2.341595458984375000e+03 2.619682312011718750e+00 4.000000000000000000e+00 1.288154907226562500e+03 -1.197500000000000000e+02 4.875000000000000000e+01
5.100000000000000000e+01 3.476076923076921616e+02 2.215895996093750000e+02 2.324493408203125000e+00 0.000000000000000000e+00 5.882353186607360840e-01 2.303160888671875000e+03 2.609005689620971680e+00 4.000000000000000000e+00 1.150046020507812500e+03 -1.192500000000000000e+02 4.875000000000000000e+01
4.900000000000000000e+01 5.030000000000003411e+02 2.590060729980468750e+02 2.054626464843750000e+00 0.000000000000000000e+00 0.000000000000000000e+00 2.264726318359375000e+03 2.123017072677612305e+00 4.000000000000000000e+00 1.104523681640625000e+03 -1.187500000000000000e+02 4.875000000000000000e+01
6.900000000000000000e+01 6.607692307692312852e+02 2.777459411621093750e+02 1.784759521484375000e+00 0.000000000000000000e+00 7.647058963775634766e-01 2.226291748046875000e+03 2.129319906234741211e+00 4.000000000000000000e+00 1.156654541015625000e+03 -1.182500000000000000e+02 4.875000000000000000e+01
4.200000000000000000e+01 8.243000000000004093e+02 3.663892517089843750e+02 1.477020263671875000e+00 0.000000000000000000e+00 0.000000000000000000e+00 2.182819824218750000e+03 2.126241445541381836e+00 3.000000000000000000e+00 1.246336547851562500e+03 -1.177500000000000000e+02 4.875000000000000000e+01
6.500000000000000000e+01 9.999615384615379980e+02 5.226275024414062500e+02 1.156616210937500000e+00 0.000000000000000000e+00 0.000000000000000000e+00 2.137668701171875000e+03 2.033294677734375000e+00 4.000000000000000000e+00 1.452042724609375000e+03 -1.172500000000000000e+02 4.875000000000000000e+01
2.200000000000000000e+01 1.064515384615384164e+03 5.465998535156250000e+02 8.362426757812500000e-01 0.000000000000000000e+00 5.294117927551269531e-01 2.092517822265625000e+03 1.938321590423583984e+00 3.000000000000000000e+00 1.699368530273437500e+03 -1.167500000000000000e+02 4.875000000000000000e+01
4.600000000000000000e+01 7.849538461538460297e+02 5.226921386718750000e+02 5.158386230468750000e-01 0.000000000000000000e+00 1.117647051811218262e+00 2.047366699218750000e+03 2.000566959381103516e+00 4.000000000000000000e+00 8.384337158203125000e+02 -1.162500000000000000e+02 4.875000000000000000e+01
6.600000000000000000e+01 6.126846153846156540e+02 5.243575439453125000e+02 5.489501953125000000e-01 0.000000000000000000e+00 5.882352963089942932e-02 2.069486572265625000e+03 2.040585517883300781e+00 4.000000000000000000e+00 1.383650390625000000e+03 -1.157500000000000000e+02 4.875000000000000000e+01
4.600000000000000000e+01 5.439846153846157222e+02 4.578054199218750000e+02 5.820617675781250000e-01 0.000000000000000000e+00 1.176470592617988586e-01 2.091606445312500000e+03 2.014220952987670898e+00 4.000000000000000000e+00 1.557121215820312500e+03 -1.152500000000000000e+02 4.875000000000000000e+01
4.500000000000000000e+01 5.925615384615383618e+02 4.863578186035156250e+02 6.151428222656250000e-01 0.000000000000000000e+00 0.000000000000000000e+00 2.113726318359375000e+03 1.922215938568115234e+00 4.000000000000000000e+00 1.721737915039062500e+03 -1.147500000000000000e+02 4.875000000000000000e+01
2.800000000000000000e+01 6.407076923076926960e+02 4.652832641601562500e+02 7.115173339843750000e-01 0.000000000000000000e+00 1.176470637321472168e+00 2.149581787109375000e+03 1.805908799171447754e+00 3.000000000000000000e+00 1.177440673828125000e+03 -1.142500000000000000e+02 4.875000000000000000e+01
4.000000000000000000e+00 5.503538461538462343e+02 5.516752319335937500e+02 9.976196289062500000e-01 1.037164032459259033e-01 1.000000000000000000e+00 2.226644775390625000e+03 1.690569281578063965e+00 1.000000000000000000e+00 1.820497558593750000e+03 -1.137500000000000000e+02 4.875000000000000000e+01
6.000000000000000000e+00 3.873076923076920934e+02 3.940711975097656250e+02 1.283752441406250000e+00 0.000000000000000000e+00 7.647058963775634766e-01 2.303708007812500000e+03 2.316104412078857422e+00 1.000000000000000000e+00 1.528029541015625000e+03 -1.132500000000000000e+02 4.875000000000000000e+01
4.000000000000000000e+00 2.983615384615384301e+02 2.052739868164062500e+02 1.569885253906250000e+00 0.000000000000000000e+00 2.352941185235977173e-01 2.380770996093750000e+03 3.308897733688354492e+00 1.000000000000000000e+00 1.298169677734375000e+03 -1.127500000000000000e+02 4.875000000000000000e+01
8.000000000000000000e+00 2.631923076923077360e+02 1.227392349243164062e+02 1.932067871093750000e+00 0.000000000000000000e+00 2.352941185235977173e-01 2.479958984375000000e+03 3.468755960464477539e+00 1.000000000000000000e+00 1.211426879882812500e+03 -1.122500000000000000e+02 4.875000000000000000e+01
0.000000000000000000e+00 2.897461538461538453e+02 1.284112091064453125e+02 2.370361328125000000e+00 0.000000000000000000e+00 2.352941185235977173e-01 2.601272216796875000e+03 3.222095727920532227e+00 1.000000000000000000e+00 1.058584838867187500e+03 -1.117500000000000000e+02 4.875000000000000000e+01
1.000000000000000000e+00 3.325846153846154039e+02 1.314438018798828125e+02 2.808654785156250000e+00 0.000000000000000000e+00 0.000000000000000000e+00 2.722585449218750000e+03 2.227022171020507812e+00 1.000000000000000000e+00 1.168593872070312500e+03 -1.112500000000000000e+02 4.875000000000000000e+01
2.000000000000000000e+00 3.329153846153846530e+02 1.252124557495117188e+02 3.246917724609375000e+00 0.000000000000000000e+00 2.941176593303680420e-01 2.843898681640625000e+03 2.853993892669677734e+00 1.000000000000000000e+00 9.763755493164062500e+02 -1.107500000000000000e+02 4.875000000000000000e+01
0.000000000000000000e+00 3.172846153846154493e+02 1.349835968017578125e+02 3.557220458984375000e+00 0.000000000000000000e+00 5.294117927551269531e-01 2.940533203125000000e+03 1.911291599273681641e+00 1.000000000000000000e+00 8.416360473632812500e+02 -1.102500000000000000e+02 4.875000000000000000e+01
4.000000000000000000e+00 2.989999999999999432e+02 1.487409057617187500e+02 3.824829101562500000e+00 0.000000000000000000e+00 0.000000000000000000e+00 3.028941406250000000e+03 2.340686321258544922e+00 1.000000000000000000e+00 8.371827392578125000e+02 -1.097500000000000000e+02 4.875000000000000000e+01
3.000000000000000000e+00 3.386769230769231172e+02 1.600512695312500000e+02 4.092437744140625000e+00 0.000000000000000000e+00 0.000000000000000000e+00 3.117349853515625000e+03 3.611043930053710938e+00 1.000000000000000000e+00 7.822606811523437500e+02 -1.092500000000000000e+02 4.875000000000000000e+01
4.000000000000000000e+00 3.424384615384615245e+02 1.472906341552734375e+02 4.360046386718750000e+00 0.000000000000000000e+00 5.882353186607360840e-01 3.205758056640625000e+03 3.583749294281005859e+00 1.000000000000000000e+00 9.875421752929687500e+02 -1.087500000000000000e+02 4.875000000000000000e+01
3.000000000000000000e+00 3.110307692307691241e+02 1.376974639892578125e+02 4.274810791015625000e+00 0.000000000000000000e+00 9.411764740943908691e-01 3.216027587890625000e+03 3.600671529769897461e+00 1.000000000000000000e+00 8.658869628906250000e+02 -1.082500000000000000e+02 4.875000000000000000e+01
5.000000000000000000e+00 2.815461538461538566e+02 1.516606903076171875e+02 4.189575195312500000e+00 0.000000000000000000e+00 0.000000000000000000e+00 3.226297119140625000e+03 3.604114294052124023e+00 1.000000000000000000e+00 8.202000122070312500e+02 -1.077500000000000000e+02 4.875000000000000000e+01
3.000000000000000000e+00 2.816615384615386120e+02 1.727922515869140625e+02 4.104339599609375000e+00 0.000000000000000000e+00 0.000000000000000000e+00 3.236566650390625000e+03 3.587646007537841797e+00 1.000000000000000000e+00 7.718680419921875000e+02 -1.072500000000000000e+02 4.875000000000000000e+01
2.000000000000000000e+00 3.165307692307691241e+02 1.634359130859375000e+02 3.961883544921875000e+00 0.000000000000000000e+00 0.000000000000000000e+00 3.232805419921875000e+03 3.204023838043212891e+00 1.000000000000000000e+00 7.914791259765625000e+02 -1.067500000000000000e+02 4.875000000000000000e+01
0.000000000000000000e+00 3.544769230769230148e+02 1.559240722656250000e+02 3.647644042968750000e+00 0.000000000000000000e+00 4.117647111415863037e-01 3.186951660156250000e+03 3.517895936965942383e+00 1.000000000000000000e+00 9.127122192382812500e+02 -1.062500000000000000e+02 4.875000000000000000e+01
3.000000000000000000e+00 3.684307692307693856e+02 1.689968109130859375e+02 3.333404541015625000e+00 0.000000000000000000e+00 0.000000000000000000e+00 3.141097656250000000e+03 3.571486711502075195e+00 1.000000000000000000e+00 8.335678710937500000e+02 -1.057500000000000000e+02 4.875000000000000000e+01
3.000000000000000000e+00 5.647692307692306031e+02 2.403510284423828125e+02 2.086334228515625000e+00 0.000000000000000000e+00 5.882353186607360840e-01 2.979109863281250000e+03 3.654108524322509766e+00 1.000000000000000000e+00 3.018871459960937500e+02 -9.775000000000000000e+01 4.875000000000000000e+01
3.000000000000000000e+00 6.086615384615383846e+02 2.816318054199218750e+02 1.529266357421875000e+00 0.000000000000000000e+00 1.117647051811218262e+00 2.877527099609375000e+03 3.549945592880249023e+00 1.000000000000000000e+00 3.100026855468750000e+02 -9.625000000000000000e+01 4.875000000000000000e+01
7.000000000000000000e+00 6.541692307692308077e+02 2.870187683105468750e+02 1.123352050781250000e+00 0.000000000000000000e+00 5.294117927551269531e-01 2.798823242187500000e+03 2.977973222732543945e+00 1.000000000000000000e+00 3.607959289550781250e+02 -9.525000000000000000e+01 4.875000000000000000e+01
1.900000000000000000e+01 6.779692307692307622e+02 2.798859252929687500e+02 9.490051269531250000e-01 0.000000000000000000e+00 5.882353186607360840e-01 2.760330078125000000e+03 2.299339532852172852e+00 3.000000000000000000e+00 3.304945068359375000e+02 -9.475000000000000000e+01 4.875000000000000000e+01
4.200000000000000000e+01 7.656846153846153129e+02 2.934852600097656250e+02 5.769348144531250000e-01 0.000000000000000000e+00 0.000000000000000000e+00 2.636902587890625000e+03 1.743902564048767090e+00 3.000000000000000000e+00 3.807443542480468750e+02 -9.275000000000000000e+01 4.875000000000000000e+01
5.400000000000000000e+01 7.967615384615388621e+02 2.932876281738281250e+02 5.652770996093750000e-01 0.000000000000000000e+00 0.000000000000000000e+00 2.613681640625000000e+03 9.819247722625732422e-01 4.000000000000000000e+00 3.776227111816406250e+02 -9.225000000000000000e+01 4.875000000000000000e+01
5.200000000000000000e+01 8.401769230769234582e+02 3.007324523925781250e+02 6.009521484375000000e-01 0.000000000000000000e+00 0.000000000000000000e+00 2.596717285156250000e+03 1.528464317321777344e+00 4.000000000000000000e+00 4.070294494628906250e+02 -9.175000000000000000e+01 4.875000000000000000e+01
6.300000000000000000e+01 8.381076923076921048e+02 3.073057556152343750e+02 7.786865234375000000e-01 0.000000000000000000e+00 0.000000000000000000e+00 2.598522216796875000e+03 2.093606233596801758e+00 4.000000000000000000e+00 4.481235351562500000e+02 -9.125000000000000000e+01 4.875000000000000000e+01
6.500000000000000000e+01 8.178923076923078952e+02 3.294457397460937500e+02 1.134155273437500000e+00 0.000000000000000000e+00 0.000000000000000000e+00 2.602131835937500000e+03 1.781433701515197754e+00 4.000000000000000000e+00 4.933945312500000000e+02 -9.025000000000000000e+01 4.875000000000000000e+01
5.400000000000000000e+01 8.235384615384620020e+02 3.220508728027343750e+02 1.237609863281250000e+00 0.000000000000000000e+00 0.000000000000000000e+00 2.512681884765625000e+03 1.718945026397705078e+00 4.000000000000000000e+00 4.865958251953125000e+02 -8.975000000000000000e+01 4.875000000000000000e+01
6.300000000000000000e+01 7.872923076923077588e+02 3.207713317871093750e+02 1.266784667968750000e+00 0.000000000000000000e+00 0.000000000000000000e+00 2.331977294921875000e+03 1.582028031349182129e+00 4.000000000000000000e+00 4.775141601562500000e+02 -8.925000000000000000e+01 4.875000000000000000e+01
5.200000000000000000e+01 8.356230769230764963e+02 3.906992797851562500e+02 8.926391601562500000e-01 0.000000000000000000e+00 5.882352963089942932e-02 2.448678955078125000e+03 1.989857554435729980e+00 4.000000000000000000e+00 3.973202819824218750e+02 -8.525000000000000000e+01 4.875000000000000000e+01
6.600000000000000000e+01 8.476846153846157677e+02 3.748545532226562500e+02 6.188354492187500000e-01 0.000000000000000000e+00 0.000000000000000000e+00 2.424813232421875000e+03 1.988097429275512695e+00 4.000000000000000000e+00 3.724656066894531250e+02 -8.475000000000000000e+01 4.875000000000000000e+01
6.300000000000000000e+01 8.826076923076925596e+02 3.755951843261718750e+02 3.489074707031250000e-01 0.000000000000000000e+00 5.882353186607360840e-01 2.402072021484375000e+03 2.003885746002197266e+00 4.000000000000000000e+00 3.590238647460937500e+02 -8.425000000000000000e+01 4.875000000000000000e+01
5.000000000000000000e+01 8.909461538461539476e+02 3.915906677246093750e+02 9.069824218750000000e-02 0.000000000000000000e+00 0.000000000000000000e+00 2.382704833984375000e+03 8.322681188583374023e-01 4.000000000000000000e+00 3.251567687988281250e+02 -8.375000000000000000e+01 4.875000000000000000e+01
5.200000000000000000e+01 8.390692307692303302e+02 4.121239318847656250e+02 -1.675415039062500000e-01 0.000000000000000000e+00 0.000000000000000000e+00 2.363337646484375000e+03 8.314341306686401367e-01 4.000000000000000000e+00 3.232625122070312500e+02 -8.325000000000000000e+01 4.875000000000000000e+01
6.900000000000000000e+01 8.361846153846149718e+02 4.251931457519531250e+02 -4.257812500000000000e-01 0.000000000000000000e+00 0.000000000000000000e+00 2.343970214843750000e+03 8.378474712371826172e-01 4.000000000000000000e+00 3.069476318359375000e+02 -8.275000000000000000e+01 4.875000000000000000e+01
2.600000000000000000e+01 8.193230769230771102e+02 4.381427917480468750e+02 -6.081237792968750000e-01 0.000000000000000000e+00 0.000000000000000000e+00 2.330743896484375000e+03 8.431279063224792480e-01 3.000000000000000000e+00 2.806641235351562500e+02 -8.225000000000000000e+01 4.875000000000000000e+01
5.000000000000000000e+01 8.190076923076923094e+02 4.495148315429687500e+02 -7.145996093750000000e-01 0.000000000000000000e+00 0.000000000000000000e+00 2.323658447265625000e+03 8.466758728027343750e-01 4.000000000000000000e+00 3.063881835937500000e+02 -8.175000000000000000e+01 4.875000000000000000e+01
6.800000000000000000e+01 8.327230769230773149e+02 4.522370300292968750e+02 -8.210754394531250000e-01 0.000000000000000000e+00 0.000000000000000000e+00 2.316572998046875000e+03 8.496609926223754883e-01 4.000000000000000000e+00 2.842149353027343750e+02 -8.125000000000000000e+01 4.875000000000000000e+01
5.300000000000000000e+01 7.844769230769231854e+02 4.393803405761718750e+02 -9.275817871093750000e-01 0.000000000000000000e+00 0.000000000000000000e+00 2.309487548828125000e+03 2.208610057830810547e+00 4.000000000000000000e+00 2.851445007324218750e+02 -8.075000000000000000e+01 4.875000000000000000e+01
3.500000000000000000e+01 8.692692307692309441e+02 4.544194946289062500e+02 -9.445800781250000000e-01 0.000000000000000000e+00 0.000000000000000000e+00 2.282124023437500000e+03 2.954519748687744141e+00 3.000000000000000000e+00 2.771963806152343750e+02 -7.925000000000000000e+01 4.875000000000000000e+01
3.900000000000000000e+01 8.796692307692305803e+02 4.685261535644531250e+02 -9.410705566406250000e-01 0.000000000000000000e+00 0.000000000000000000e+00 2.272817871093750000e+03 9.172104597091674805e-01 3.000000000000000000e+00 3.135198669433593750e+02 -7.875000000000000000e+01 4.875000000000000000e+01
6.400000000000000000e+01 8.800307692307688967e+02 4.663063659667968750e+02 -8.997192382812500000e-01 0.000000000000000000e+00 0.000000000000000000e+00 2.256313964843750000e+03 1.140908479690551758e+00 4.000000000000000000e+00 3.085361022949218750e+02 -7.825000000000000000e+01 4.875000000000000000e+01
6.800000000000000000e+01 8.956076923076919911e+02 4.659923400878906250e+02 -8.170166015625000000e-01 0.000000000000000000e+00 0.000000000000000000e+00 2.223306396484375000e+03 8.166640400886535645e-01 4.000000000000000000e+00 3.030991821289062500e+02 -7.725000000000000000e+01 4.875000000000000000e+01
3.600000000000000000e+01 9.059923076923080316e+02 4.660487060546875000e+02 -7.882080078125000000e-01 0.000000000000000000e+00 2.941176593303680420e-01 2.205148437500000000e+03 1.996564507484436035e+00 3.000000000000000000e+00 4.052286682128906250e+02 -7.675000000000000000e+01 4.875000000000000000e+01
7.000000000000000000e+01 9.243076923076921503e+02 4.743436889648437500e+02 -9.009704589843750000e-01 9.999999776482582092e-03 5.882353186607360840e-01 2.096708740234375000e+03 1.556341886520385742e+00 4.000000000000000000e+00 5.547574462890625000e+02 -7.425000000000000000e+01 4.875000000000000000e+01
2.400000000000000000e+01 9.550230769230765873e+02 4.397765808105468750e+02 -1.010253906250000000e+00 9.999999776482582092e-03 0.000000000000000000e+00 2.060018798828125000e+03 1.325016379356384277e+00 3.000000000000000000e+00 5.566351318359375000e+02 -7.325000000000000000e+01 4.875000000000000000e+01
5.700000000000000000e+01 8.947923076923075314e+02 4.403489379882812500e+02 -1.052398681640625000e+00 0.000000000000000000e+00 0.000000000000000000e+00 2.048578613281250000e+03 1.049268126487731934e+00 4.000000000000000000e+00 2.467613983154296875e+02 -7.275000000000000000e+01 4.875000000000000000e+01
6.600000000000000000e+01 1.094961538461538112e+03 4.347026367187500000e+02 -1.166442871093750000e+00 0.000000000000000000e+00 0.000000000000000000e+00 2.021163452148437500e+03 1.112321734428405762e+00 4.000000000000000000e+00 3.124559936523437500e+02 -7.125000000000000000e+01 4.875000000000000000e+01
6.300000000000000000e+01 1.086076923076922867e+03 4.523085021972656250e+02 -1.130493164062500000e+00 9.999999776482582092e-03 0.000000000000000000e+00 2.029170410156250000e+03 1.936403274536132812e+00 4.000000000000000000e+00 6.773883056640625000e+02 -7.075000000000000000e+01 4.875000000000000000e+01
5.800000000000000000e+01 1.174315384615385028e+03 4.608168640136718750e+02 -1.094543457031250000e+00 9.999999776482582092e-03 0.000000000000000000e+00 2.037177490234375000e+03 1.361374258995056152e+00 4.000000000000000000e+00 6.630941162109375000e+02 -7.025000000000000000e+01 4.875000000000000000e+01
5.600000000000000000e+01 1.137061538461538930e+03 4.731344604492187500e+02 -1.058593750000000000e+00 0.000000000000000000e+00 0.000000000000000000e+00 2.045184570312500000e+03 7.994110584259033203e-01 4.000000000000000000e+00 3.482135009765625000e+02 -6.975000000000000000e+01 4.875000000000000000e+01
6.300000000000000000e+01 1.145838461538461843e+03 5.022133178710937500e+02 -1.372985839843750000e-01 0.000000000000000000e+00 0.000000000000000000e+00 2.175510009765625000e+03 1.038995623588562012e+00 4.000000000000000000e+00 3.110983276367187500e+02 -6.725000000000000000e+01 4.875000000000000000e+01
2.600000000000000000e+01 1.208000000000000227e+03 4.871895751953125000e+02 2.570800781250000000e-01 0.000000000000000000e+00 0.000000000000000000e+00 2.213376708984375000e+03 1.195668578147888184e+00 3.000000000000000000e+00 5.611240844726562500e+02 -6.675000000000000000e+01 4.875000000000000000e+01
6.300000000000000000e+01 1.253076923076922867e+03 4.971596679687500000e+02 6.514587402343750000e-01 0.000000000000000000e+00 0.000000000000000000e+00 2.251243408203125000e+03 8.938788771629333496e-01 4.000000000000000000e+00 3.931585388183593750e+02 -6.625000000000000000e+01 4.875000000000000000e+01
3.400000000000000000e+01 1.204330769230769647e+03 5.278962402343750000e+02 1.045867919921875000e+00 0.000000000000000000e+00 0.000000000000000000e+00 2.289110107421875000e+03 7.921564579010009766e-01 3.000000000000000000e+00 5.199870605468750000e+02 -6.575000000000000000e+01 4.875000000000000000e+01
5.000000000000000000e+01 1.180930769230769556e+03 5.565148315429687500e+02 1.506378173828125000e+00 0.000000000000000000e+00 0.000000000000000000e+00 2.279867431640625000e+03 7.957042455673217773e-01 4.000000000000000000e+00 4.247658996582031250e+02 -6.525000000000000000e+01 4.875000000000000000e+01
6.600000000000000000e+01 1.187815384615384573e+03 5.754304199218750000e+02 1.988922119140625000e+00 0.000000000000000000e+00 0.000000000000000000e+00 2.254921875000000000e+03 8.036502003669738770e-01 4.000000000000000000e+00 2.171273345947265625e+02 -6.475000000000000000e+01 4.875000000000000000e+01
5.000000000000000000e+01 1.160838461538461161e+03 5.859000244140625000e+02 3.309448242187500000e+00 0.000000000000000000e+00 0.000000000000000000e+00 2.132410156250000000e+03 1.969517230987548828e+00 4.000000000000000000e+00 2.921867370605468750e+02 -5.825000000000000000e+01 4.875000000000000000e+01
7.000000000000000000e+00 1.121976923076923413e+03 5.909415283203125000e+02 3.223968505859375000e+00 0.000000000000000000e+00 0.000000000000000000e+00 2.139426757812500000e+03 1.519392251968383789e+00 1.000000000000000000e+00 4.890669860839843750e+02 -5.725000000000000000e+01 4.875000000000000000e+01
6.600000000000000000e+01 1.134676923076923231e+03 5.812207031250000000e+02 3.191894531250000000e+00 0.000000000000000000e+00 0.000000000000000000e+00 2.147907958984375000e+03 1.948730230331420898e+00 4.000000000000000000e+00 2.246129150390625000e+02 -5.625000000000000000e+01 4.875000000000000000e+01
5.800000000000000000e+01 1.136076923076922640e+03 5.720255737304687500e+02 3.273681640625000000e+00 0.000000000000000000e+00 0.000000000000000000e+00 2.153154052734375000e+03 2.008877277374267578e+00 4.000000000000000000e+00 2.072796783447265625e+02 -5.575000000000000000e+01 4.875000000000000000e+01
3.800000000000000000e+01 1.188407692307692741e+03 5.780091552734375000e+02 3.355468750000000000e+00 0.000000000000000000e+00 0.000000000000000000e+00 2.158400146484375000e+03 2.023649454116821289e+00 3.000000000000000000e+00 2.823653869628906250e+02 -5.525000000000000000e+01 4.875000000000000000e+01
2.100000000000000000e+01 1.207984615384615608e+03 5.965772094726562500e+02 3.437255859375000000e+00 0.000000000000000000e+00 0.000000000000000000e+00 2.163645996093750000e+03 2.008907079696655273e+00 3.000000000000000000e+00 2.294651031494140625e+02 -5.475000000000000000e+01 4.875000000000000000e+01
7.400000000000000000e+01 2.516523076923076587e+03 5.947929077148437500e+02 6.210510253906250000e+00 0.000000000000000000e+00 0.000000000000000000e+00 2.736303466796875000e+03 2.151160955429077148e+00 4.000000000000000000e+00 5.131040649414062500e+02 -1.252500000000000000e+02 4.925000000000000000e+01
2.200000000000000000e+01 2.204084615384614608e+03 6.278273925781250000e+02 2.829895019531250000e+00 0.000000000000000000e+00 0.000000000000000000e+00 2.156440673828125000e+03 2.504439592361450195e+00 3.000000000000000000e+00 1.497533226013183594e+01 -1.227500000000000000e+02 4.925000000000000000e+01
5.500000000000000000e+01 2.097146153846153084e+03 6.271173706054687500e+02 2.515136718750000000e+00 0.000000000000000000e+00 0.000000000000000000e+00 2.140967529296875000e+03 2.397407054901123047e+00 4.000000000000000000e+00 2.465562744140625000e+02 -1.222500000000000000e+02 4.925000000000000000e+01
3.000000000000000000e+01 1.700561538461538476e+03 6.337731933593750000e+02 2.211822509765625000e+00 0.000000000000000000e+00 0.000000000000000000e+00 2.126057128906250000e+03 2.202403306961059570e+00 3.000000000000000000e+00 2.230149078369140625e+01 -1.217500000000000000e+02 4.925000000000000000e+01
6.000000000000000000e+01 1.192792307692307759e+03 6.278632202148437500e+02 1.942871093750000000e+00 0.000000000000000000e+00 0.000000000000000000e+00 2.112833984375000000e+03 1.920868277549743652e+00 4.000000000000000000e+00 1.355381713867187500e+03 -1.212500000000000000e+02 4.925000000000000000e+01
5.800000000000000000e+01 8.908692307692309669e+02 4.793365783691406250e+02 1.673919677734375000e+00 0.000000000000000000e+00 5.882352963089942932e-02 2.099610839843750000e+03 1.723192691802978516e+00 4.000000000000000000e+00 1.576401367187500000e+03 -1.207500000000000000e+02 4.925000000000000000e+01
5.900000000000000000e+01 6.787923076923077588e+02 3.102082214355468750e+02 1.404968261718750000e+00 9.999999776482582092e-03 5.882352963089942932e-02 2.086387939453125000e+03 1.732160091400146484e+00 4.000000000000000000e+00 1.724958862304687500e+03 -1.202500000000000000e+02 4.925000000000000000e+01
5.400000000000000000e+01 4.805538461538459387e+02 2.287917938232421875e+02 1.132995605468750000e+00 0.000000000000000000e+00 0.000000000000000000e+00 2.063425292968750000e+03 1.861624002456665039e+00 4.000000000000000000e+00 1.285924072265625000e+03 -1.197500000000000000e+02 4.925000000000000000e+01
5.700000000000000000e+01 5.408615384615383164e+02 2.220984802246093750e+02 8.580322265625000000e-01 0.000000000000000000e+00 5.294117927551269531e-01 2.030723754882812500e+03 1.916132688522338867e+00 4.000000000000000000e+00 1.644655395507812500e+03 -1.192500000000000000e+02 4.925000000000000000e+01
6.900000000000000000e+01 6.784000000000003183e+02 2.521509246826171875e+02 5.830993652343750000e-01 0.000000000000000000e+00 0.000000000000000000e+00 1.998021972656250000e+03 1.935051441192626953e+00 4.000000000000000000e+00 1.319899414062500000e+03 -1.187500000000000000e+02 4.925000000000000000e+01
4.800000000000000000e+01 8.647076923076921275e+02 2.406220550537109375e+02 3.081359863281250000e-01 0.000000000000000000e+00 0.000000000000000000e+00 1.965320312500000000e+03 1.955699324607849121e+00 4.000000000000000000e+00 1.235299072265625000e+03 -1.182500000000000000e+02 4.925000000000000000e+01
6.900000000000000000e+01 1.057684615384615654e+03 2.099703674316406250e+02 5.718994140625000000e-02 0.000000000000000000e+00 0.000000000000000000e+00 1.925743041992187500e+03 1.949599981307983398e+00 4.000000000000000000e+00 1.254394653320312500e+03 -1.177500000000000000e+02 4.925000000000000000e+01
7.500000000000000000e+01 1.158807692307691923e+03 3.573743286132812500e+02 -1.857299804687500000e-01 0.000000000000000000e+00 0.000000000000000000e+00 1.883874023437500000e+03 1.893910884857177734e+00 4.000000000000000000e+00 1.077968872070312500e+03 -1.172500000000000000e+02 4.925000000000000000e+01
7.300000000000000000e+01 1.163338461538461161e+03 4.133062133789062500e+02 -4.286499023437500000e-01 0.000000000000000000e+00 2.352941185235977173e-01 1.842004882812500000e+03 1.792010068893432617e+00 4.000000000000000000e+00 1.245673461914062500e+03 -1.167500000000000000e+02 4.925000000000000000e+01
4.600000000000000000e+01 8.708769230769224805e+02 3.836186218261718750e+02 -6.715698242187500000e-01 0.000000000000000000e+00 2.352941185235977173e-01 1.800135864257812500e+03 1.824011921882629395e+00 4.000000000000000000e+00 1.715379272460937500e+03 -1.162500000000000000e+02 4.925000000000000000e+01
5.100000000000000000e+01 5.903769230769229353e+02 4.612875671386718750e+02 -4.666748046875000000e-01 0.000000000000000000e+00 4.705882370471954346e-01 1.860409545898437500e+03 1.960814237594604492e+00 4.000000000000000000e+00 1.631804687500000000e+03 -1.157500000000000000e+02 4.925000000000000000e+01
4.300000000000000000e+01 6.116615384615387256e+02 4.903478698730468750e+02 -2.617797851562500000e-01 0.000000000000000000e+00 4.705882370471954346e-01 1.920683227539062500e+03 1.991820931434631348e+00 3.000000000000000000e+00 7.784222412109375000e+02 -1.152500000000000000e+02 4.925000000000000000e+01
5.500000000000000000e+01 6.621307692307693742e+02 5.624672241210937500e+02 -5.688476562500000000e-02 9.999999776482582092e-03 2.352941185235977173e-01 1.980956909179687500e+03 1.830621242523193359e+00 4.000000000000000000e+00 1.867376831054687500e+03 -1.147500000000000000e+02 4.925000000000000000e+01
4.000000000000000000e+01 6.635999999999999091e+02 4.905943298339843750e+02 1.897583007812500000e-01 0.000000000000000000e+00 5.882353186607360840e-01 2.050075927734375000e+03 2.126776456832885742e+00 3.000000000000000000e+00 1.806257812500000000e+03 -1.142500000000000000e+02 4.925000000000000000e+01
6.000000000000000000e+00 4.193153846153845734e+02 2.639287719726562500e+02 9.336242675781250000e-01 0.000000000000000000e+00 0.000000000000000000e+00 2.241386718750000000e+03 3.158167362213134766e+00 1.000000000000000000e+00 1.122803833007812500e+03 -1.132500000000000000e+02 4.925000000000000000e+01
1.400000000000000000e+01 3.328846153846152447e+02 1.906021270751953125e+02 1.305572509765625000e+00 0.000000000000000000e+00 0.000000000000000000e+00 2.337041992187500000e+03 2.544607639312744141e+00 3.000000000000000000e+00 1.249766235351562500e+03 -1.127500000000000000e+02 4.925000000000000000e+01
5.000000000000000000e+00 2.924230769230769056e+02 1.597720031738281250e+02 1.708953857421875000e+00 0.000000000000000000e+00 0.000000000000000000e+00 2.445398193359375000e+03 3.496264934539794922e+00 1.000000000000000000e+00 1.045463989257812500e+03 -1.122500000000000000e+02 4.925000000000000000e+01
0.000000000000000000e+00 2.812153846153846644e+02 1.537418212890625000e+02 2.143859863281250000e+00 0.000000000000000000e+00 1.058823585510253906e+00 2.566455566406250000e+03 3.581105947494506836e+00 1.000000000000000000e+00 9.253961181640625000e+02 -1.117500000000000000e+02 4.925000000000000000e+01
1.000000000000000000e+00 3.186999999999998181e+02 1.517588806152343750e+02 2.578735351562500000e+00 0.000000000000000000e+00 1.235294103622436523e+00 2.687512939453125000e+03 3.624828577041625977e+00 1.000000000000000000e+00 9.303930053710937500e+02 -1.112500000000000000e+02 4.925000000000000000e+01
5.000000000000000000e+00 3.248076923076923208e+02 1.425141754150390625e+02 3.013610839843750000e+00 0.000000000000000000e+00 2.352941185235977173e-01 2.808570312500000000e+03 3.587942600250244141e+00 1.000000000000000000e+00 8.799439697265625000e+02 -1.107500000000000000e+02 4.925000000000000000e+01
4.000000000000000000e+00 3.142384615384615927e+02 1.528847503662109375e+02 3.282257080078125000e+00 0.000000000000000000e+00 0.000000000000000000e+00 2.896389160156250000e+03 3.480559825897216797e+00 1.000000000000000000e+00 9.763619384765625000e+02 -1.102500000000000000e+02 4.925000000000000000e+01
1.000000000000000000e+00 3.169846153846154948e+02 1.870537567138671875e+02 3.495483398437500000e+00 0.000000000000000000e+00 0.000000000000000000e+00 2.973128173828125000e+03 3.441937208175659180e+00 1.000000000000000000e+00 9.729649658203125000e+02 -1.097500000000000000e+02 4.925000000000000000e+01
4.000000000000000000e+00 3.480153846153846757e+02 1.795344696044921875e+02 3.708679199218750000e+00 0.000000000000000000e+00 0.000000000000000000e+00 3.049867431640625000e+03 3.420085430145263672e+00 1.000000000000000000e+00 9.762777709960937500e+02 -1.092500000000000000e+02 4.925000000000000000e+01
4.000000000000000000e+00 3.562615384615383505e+02 1.488857727050781250e+02 3.921905517578125000e+00 0.000000000000000000e+00 3.529411852359771729e-01 3.126606689453125000e+03 3.439935445785522461e+00 1.000000000000000000e+00 9.189846801757812500e+02 -1.087500000000000000e+02 4.925000000000000000e+01
2.000000000000000000e+00 3.204230769230769056e+02 1.472461395263671875e+02 3.791625976562500000e+00 0.000000000000000000e+00 5.882352963089942932e-02 3.128061279296875000e+03 3.463482856750488281e+00 1.000000000000000000e+00 9.479498901367187500e+02 -1.082500000000000000e+02 4.925000000000000000e+01
7.000000000000000000e+00 2.830692307692306713e+02 1.681241607666015625e+02 3.661315917968750000e+00 0.000000000000000000e+00 0.000000000000000000e+00 3.129515869140625000e+03 3.463948726654052734e+00 1.000000000000000000e+00 8.009554443359375000e+02 -1.077500000000000000e+02 4.925000000000000000e+01
6.000000000000000000e+00 2.997615384615385210e+02 2.029603271484375000e+02 3.531036376953125000e+00 0.000000000000000000e+00 0.000000000000000000e+00 3.130970703125000000e+03 3.438523530960083008e+00 1.000000000000000000e+00 9.338153686523437500e+02 -1.072500000000000000e+02 4.925000000000000000e+01
2.000000000000000000e+01 3.333307692307693060e+02 1.858491363525390625e+02 3.353637695312500000e+00 0.000000000000000000e+00 0.000000000000000000e+00 3.120537353515625000e+03 2.690616607666015625e+00 3.000000000000000000e+00 9.353649902343750000e+02 -1.067500000000000000e+02 4.925000000000000000e+01
5.000000000000000000e+00 3.594999999999999432e+02 1.806683197021484375e+02 3.034881591796875000e+00 0.000000000000000000e+00 0.000000000000000000e+00 3.074440673828125000e+03 3.483067035675048828e+00 1.000000000000000000e+00 9.630839843750000000e+02 -1.062500000000000000e+02 4.925000000000000000e+01
1.000000000000000000e+00 3.770461538461537430e+02 1.949505615234375000e+02 2.716156005859375000e+00 0.000000000000000000e+00 0.000000000000000000e+00 3.028343750000000000e+03 3.512626647949218750e+00 1.000000000000000000e+00 8.517586669921875000e+02 -1.057500000000000000e+02 4.925000000000000000e+01
5.000000000000000000e+00 3.857307692307689422e+02 2.350940856933593750e+02 2.397399902343750000e+00 0.000000000000000000e+00 0.000000000000000000e+00 2.982246826171875000e+03 3.501927375793457031e+00 1.000000000000000000e+00 7.306081542968750000e+02 -1.052500000000000000e+02 4.925000000000000000e+01
9.000000000000000000e+00 6.082769230769233673e+02 2.405893096923828125e+02 1.621002197265625000e+00 0.000000000000000000e+00 1.176470637321472168e+00 2.889971923828125000e+03 3.567128181457519531e+00 1.000000000000000000e+00 3.852011108398437500e+02 -9.825000000000000000e+01 4.925000000000000000e+01
6.700000000000000000e+01 6.045384615384616609e+02 2.650178222656250000e+02 1.083984375000000000e+00 0.000000000000000000e+00 2.352941185235977173e-01 2.789942626953125000e+03 1.604526042938232422e+00 4.000000000000000000e+00 3.350627746582031250e+02 -9.625000000000000000e+01 4.925000000000000000e+01
6.400000000000000000e+01 7.391923076923077360e+02 3.228109436035156250e+02 1.657714843750000000e-01 0.000000000000000000e+00 0.000000000000000000e+00 2.599057617187500000e+03 2.229964971542358398e+00 4.000000000000000000e+00 3.797130432128906250e+02 -9.375000000000000000e+01 4.925000000000000000e+01
5.100000000000000000e+01 7.536615384615387256e+02 3.281007080078125000e+02 1.382446289062500000e-01 0.000000000000000000e+00 0.000000000000000000e+00 2.575084960937500000e+03 2.220333099365234375e+00 4.000000000000000000e+00 3.912229614257812500e+02 -9.325000000000000000e+01 4.925000000000000000e+01
4.800000000000000000e+01 7.627153846153848917e+02 3.214253845214843750e+02 1.107482910156250000e-01 0.000000000000000000e+00 0.000000000000000000e+00 2.551112060546875000e+03 2.191840171813964844e+00 4.000000000000000000e+00 4.321422729492187500e+02 -9.275000000000000000e+01 4.925000000000000000e+01
5.800000000000000000e+01 8.013999999999997499e+02 3.291920776367187500e+02 9.545898437500000000e-02 0.000000000000000000e+00 0.000000000000000000e+00 2.508476806640625000e+03 2.142397880554199219e+00 4.000000000000000000e+00 4.599570617675781250e+02 -9.175000000000000000e+01 4.925000000000000000e+01
5.000000000000000000e+01 8.144461538461540613e+02 3.338511352539062500e+02 2.267761230468750000e-01 0.000000000000000000e+00 0.000000000000000000e+00 2.505746582031250000e+03 2.106612205505371094e+00 4.000000000000000000e+00 4.646437377929687500e+02 -9.125000000000000000e+01 4.925000000000000000e+01
5.500000000000000000e+01 8.320461538461541977e+02 3.470938720703125000e+02 3.580932617187500000e-01 0.000000000000000000e+00 5.882352963089942932e-02 2.503016113281250000e+03 2.058901309967041016e+00 4.000000000000000000e+00 5.062287292480468750e+02 -9.075000000000000000e+01 4.925000000000000000e+01
6.000000000000000000e+01 8.155384615384620020e+02 3.460782470703125000e+02 5.634460449218750000e-01 0.000000000000000000e+00 2.941176593303680420e-01 2.433010253906250000e+03 1.985941886901855469e+00 4.000000000000000000e+00 4.912802124023437500e+02 -8.975000000000000000e+01 4.925000000000000000e+01
4.500000000000000000e+01 8.097307692307693969e+02 3.297027282714843750e+02 5.801391601562500000e-01 0.000000000000000000e+00 0.000000000000000000e+00 2.301189941406250000e+03 1.636946797370910645e+00 4.000000000000000000e+00 4.277769470214843750e+02 -8.925000000000000000e+01 4.925000000000000000e+01
4.700000000000000000e+01 8.204307692307695561e+02 3.566723937988281250e+02 6.115112304687500000e-01 0.000000000000000000e+00 2.352941185235977173e-01 2.083339355468750000e+03 1.979182600975036621e+00 4.000000000000000000e+00 4.700942382812500000e+02 -8.775000000000000000e+01 4.925000000000000000e+01
5.000000000000000000e+01 8.257461538461537884e+02 3.937156066894531250e+02 6.032409667968750000e-01 0.000000000000000000e+00 0.000000000000000000e+00 2.188333251953125000e+03 1.952056288719177246e+00 4.000000000000000000e+00 4.123779296875000000e+02 -8.725000000000000000e+01 4.925000000000000000e+01
2.900000000000000000e+01 8.287538461538463253e+02 4.084529113769531250e+02 5.949707031250000000e-01 0.000000000000000000e+00 2.352941185235977173e-01 2.293327148437500000e+03 1.918120384216308594e+00 3.000000000000000000e+00 3.583916320800781250e+02 -8.675000000000000000e+01 4.925000000000000000e+01
2.200000000000000000e+01 8.390153846153848463e+02 4.113103637695312500e+02 5.867004394531250000e-01 0.000000000000000000e+00 5.882353186607360840e-01 2.398321044921875000e+03 1.283315420150756836e+00 3.000000000000000000e+00 3.113303222656250000e+02 -8.625000000000000000e+01 4.925000000000000000e+01
4.400000000000000000e+01 8.315923076923073722e+02 4.094239501953125000e+02 3.656311035156250000e-01 0.000000000000000000e+00 6.470588445663452148e-01 2.380763183593750000e+03 1.490266084671020508e+00 3.000000000000000000e+00 3.400563964843750000e+02 -8.575000000000000000e+01 4.925000000000000000e+01
6.400000000000000000e+01 7.759923076923075769e+02 4.039267578125000000e+02 1.445617675781250000e-01 0.000000000000000000e+00 0.000000000000000000e+00 2.363205566406250000e+03 1.523413896560668945e+00 4.000000000000000000e+00 3.684986877441406250e+02 -8.525000000000000000e+01 4.925000000000000000e+01
3.400000000000000000e+01 7.335846153846148354e+02 3.970148315429687500e+02 -7.650756835937500000e-02 0.000000000000000000e+00 0.000000000000000000e+00 2.345647705078125000e+03 1.773223876953125000e+00 3.000000000000000000e+00 3.455503234863281250e+02 -8.475000000000000000e+01 4.925000000000000000e+01
4.600000000000000000e+01 7.916615384615387256e+02 3.963053588867187500e+02 -2.861022949218750000e-01 0.000000000000000000e+00 0.000000000000000000e+00 2.329396972656250000e+03 8.957246541976928711e-01 4.000000000000000000e+00 3.059250793457031250e+02 -8.425000000000000000e+01 4.925000000000000000e+01
6.500000000000000000e+01 8.295846153846151765e+02 4.077998962402343750e+02 -4.613037109375000000e-01 0.000000000000000000e+00 0.000000000000000000e+00 2.317066894531250000e+03 1.114793658256530762e+00 4.000000000000000000e+00 2.957686462402343750e+02 -8.375000000000000000e+01 4.925000000000000000e+01
6.700000000000000000e+01 8.500692307692307850e+02 4.221688232421875000e+02 -6.364746093750000000e-01 0.000000000000000000e+00 0.000000000000000000e+00 2.304736816406250000e+03 1.725010275840759277e+00 4.000000000000000000e+00 2.794913024902343750e+02 -8.325000000000000000e+01 4.925000000000000000e+01
4.000000000000000000e+01 8.176307692307689194e+02 4.326007080078125000e+02 -8.116455078125000000e-01 0.000000000000000000e+00 0.000000000000000000e+00 2.292406738281250000e+03 1.356175899505615234e+00 3.000000000000000000e+00 2.633078613281250000e+02 -8.275000000000000000e+01 4.925000000000000000e+01
3.500000000000000000e+01 7.988307692307693060e+02 4.375917663574218750e+02 -9.325256347656250000e-01 0.000000000000000000e+00 0.000000000000000000e+00 2.283651611328125000e+03 1.607346534729003906e+00 3.000000000000000000e+00 2.591428527832031250e+02 -8.225000000000000000e+01 4.925000000000000000e+01
5.400000000000000000e+01 8.028461538461538112e+02 4.423493652343750000e+02 -9.990844726562500000e-01 0.000000000000000000e+00 0.000000000000000000e+00 2.278471679687500000e+03 8.361105322837829590e-01 4.000000000000000000e+00 2.402050018310546875e+02 -8.175000000000000000e+01 4.925000000000000000e+01
5.700000000000000000e+01 8.190846153846159723e+02 4.489575500488281250e+02 -1.065643310546875000e+00 0.000000000000000000e+00 0.000000000000000000e+00 2.273291748046875000e+03 8.428258895874023438e-01 4.000000000000000000e+00 2.434719238281250000e+02 -8.125000000000000000e+01 4.925000000000000000e+01
7.100000000000000000e+01 8.275461538461541977e+02 4.507461242675781250e+02 -1.132202148437500000e+00 0.000000000000000000e+00 0.000000000000000000e+00 2.268111816406250000e+03 9.965552091598510742e-01 4.000000000000000000e+00 2.756149902343750000e+02 -8.075000000000000000e+01 4.925000000000000000e+01
7.100000000000000000e+01 8.260999999999996817e+02 4.515292663574218750e+02 -1.157226562500000000e+00 0.000000000000000000e+00 0.000000000000000000e+00 2.258164062500000000e+03 8.355590105056762695e-01 4.000000000000000000e+00 3.472778320312500000e+02 -8.025000000000000000e+01 4.925000000000000000e+01
4.800000000000000000e+01 8.114230769230767919e+02 4.552044982910156250e+02 -1.168395996093750000e+00 0.000000000000000000e+00 0.000000000000000000e+00 2.246627197265625000e+03 1.819547057151794434e+00 4.000000000000000000e+00 2.970032958984375000e+02 -7.975000000000000000e+01 4.925000000000000000e+01
6.300000000000000000e+01 8.355538461538460524e+02 4.603703613281250000e+02 -1.179565429687500000e+00 0.000000000000000000e+00 0.000000000000000000e+00 2.235090087890625000e+03 9.559422135353088379e-01 4.000000000000000000e+00 3.030541687011718750e+02 -7.925000000000000000e+01 4.925000000000000000e+01
6.100000000000000000e+01 8.520000000000001137e+02 4.633320922851562500e+02 -1.190734863281250000e+00 0.000000000000000000e+00 0.000000000000000000e+00 2.223552978515625000e+03 1.288546085357666016e+00 4.000000000000000000e+00 2.821734924316406250e+02 -7.875000000000000000e+01 4.925000000000000000e+01
4.500000000000000000e+01 8.597615384615388621e+02 4.606148986816406250e+02 -1.203765869140625000e+00 0.000000000000000000e+00 0.000000000000000000e+00 2.201635498046875000e+03 1.605650305747985840e+00 4.000000000000000000e+00 2.887521362304687500e+02 -7.825000000000000000e+01 4.925000000000000000e+01
2.500000000000000000e+01 8.474846153846154948e+02 4.560327148437500000e+02 -1.216796875000000000e+00 0.000000000000000000e+00 0.000000000000000000e+00 2.179717773437500000e+03 8.380243778228759766e-01 3.000000000000000000e+00 3.131561279296875000e+02 -7.775000000000000000e+01 4.925000000000000000e+01
3.700000000000000000e+01 8.482384615384614790e+02 4.500098571777343750e+02 -1.229827880859375000e+00 0.000000000000000000e+00 0.000000000000000000e+00 2.157800048828125000e+03 8.113615512847900391e-01 3.000000000000000000e+00 2.693034057617187500e+02 -7.725000000000000000e+01 4.925000000000000000e+01
6.000000000000000000e+01 8.673615384615386574e+02 4.495261535644531250e+02 -1.252166748046875000e+00 0.000000000000000000e+00 0.000000000000000000e+00 2.134825927734375000e+03 1.473204374313354492e+00 4.000000000000000000e+00 3.101013183593750000e+02 -7.675000000000000000e+01 4.925000000000000000e+01
3.800000000000000000e+01 8.557923076923078725e+02 4.609091796875000000e+02 -1.302398681640625000e+00 0.000000000000000000e+00 2.941176593303680420e-01 2.108683105468750000e+03 1.886710047721862793e+00 3.000000000000000000e+00 3.362405090332031250e+02 -7.625000000000000000e+01 4.925000000000000000e+01
4.900000000000000000e+01 8.670000000000001137e+02 4.849335632324218750e+02 -1.352600097656250000e+00 9.999999776482582092e-03 0.000000000000000000e+00 2.082540283203125000e+03 1.981702566146850586e+00 4.000000000000000000e+00 3.981425476074218750e+02 -7.575000000000000000e+01 4.925000000000000000e+01
4.800000000000000000e+01 8.733076923076921503e+02 4.935500793457031250e+02 -1.402832031250000000e+00 9.999999776482582092e-03 5.882353186607360840e-01 2.056397460937500000e+03 1.970242381095886230e+00 4.000000000000000000e+00 3.909648437500000000e+02 -7.525000000000000000e+01 4.925000000000000000e+01
6.100000000000000000e+01 8.935769230769226397e+02 4.943325500488281250e+02 -1.459381103515625000e+00 9.999999776482582092e-03 2.941176593303680420e-01 2.033066894531250000e+03 1.963293671607971191e+00 4.000000000000000000e+00 4.352072753906250000e+02 -7.475000000000000000e+01 4.925000000000000000e+01
6.300000000000000000e+01 8.419461538461533792e+02 4.467470092773437500e+02 -1.585144042968750000e+00 0.000000000000000000e+00 5.882353186607360840e-01 1.992030639648437500e+03 1.987639188766479492e+00 4.000000000000000000e+00 4.083409423828125000e+02 -7.375000000000000000e+01 4.925000000000000000e+01
6.000000000000000000e+01 8.622153846153846644e+02 4.200051269531250000e+02 -1.648040771484375000e+00 9.999999776482582092e-03 2.941176593303680420e-01 1.971512451171875000e+03 1.976844549179077148e+00 4.000000000000000000e+00 4.407975158691406250e+02 -7.325000000000000000e+01 4.925000000000000000e+01
5.500000000000000000e+01 9.179076923076929688e+02 4.439488220214843750e+02 -1.692108154296875000e+00 0.000000000000000000e+00 2.941176593303680420e-01 1.949466430664062500e+03 8.163918256759643555e-01 4.000000000000000000e+00 2.476797790527343750e+02 -7.225000000000000000e+01 4.925000000000000000e+01
5.400000000000000000e+01 1.030892307692307668e+03 4.438976745605468750e+02 -1.708312988281250000e+00 9.999999776482582092e-03 0.000000000000000000e+00 1.939799926757812500e+03 7.982945442199707031e-01 4.000000000000000000e+00 3.686542053222656250e+02 -7.175000000000000000e+01 4.925000000000000000e+01
6.600000000000000000e+01 1.097846153846154266e+03 4.487626953125000000e+02 -1.724517822265625000e+00 0.000000000000000000e+00 0.000000000000000000e+00 1.930133422851562500e+03 1.248808979988098145e+00 4.000000000000000000e+00 4.691609191894531250e+02 -7.125000000000000000e+01 4.925000000000000000e+01
5.600000000000000000e+01 1.086607692307692787e+03 4.620738525390625000e+02 -1.678955078125000000e+00 9.999999776482582092e-03 5.882353186607360840e-01 1.935918701171875000e+03 1.920350790023803711e+00 4.000000000000000000e+00 5.749169921875000000e+02 -7.075000000000000000e+01 4.925000000000000000e+01
5.600000000000000000e+01 1.081299999999999955e+03 4.725560913085937500e+02 -1.633361816406250000e+00 9.999999776482582092e-03 0.000000000000000000e+00 1.941703979492187500e+03 1.927409648895263672e+00 4.000000000000000000e+00 5.893591918945312500e+02 -7.025000000000000000e+01 4.925000000000000000e+01
6.500000000000000000e+01 1.064407692307692741e+03 4.841303710937500000e+02 -1.587799072265625000e+00 9.999999776482582092e-03 0.000000000000000000e+00 1.947489135742187500e+03 7.925474643707275391e-01 4.000000000000000000e+00 5.067434387207031250e+02 -6.975000000000000000e+01 4.925000000000000000e+01
5.700000000000000000e+01 1.099492307692308032e+03 4.872374877929687500e+02 -1.512359619140625000e+00 0.000000000000000000e+00 0.000000000000000000e+00 1.957735595703125000e+03 8.004487156867980957e-01 4.000000000000000000e+00 3.906955566406250000e+02 -6.925000000000000000e+01 4.925000000000000000e+01
6.000000000000000000e+01 1.081007692307691968e+03 4.964739074707031250e+02 -1.347473144531250000e+00 0.000000000000000000e+00 0.000000000000000000e+00 1.981365966796875000e+03 1.774352192878723145e+00 4.000000000000000000e+00 3.123943176269531250e+02 -6.875000000000000000e+01 4.925000000000000000e+01
2.600000000000000000e+01 1.144969230769231444e+03 5.746969604492187500e+02 2.671325683593750000e+00 0.000000000000000000e+00 0.000000000000000000e+00 1.973842041015625000e+03 1.965775966644287109e+00 3.000000000000000000e+00 2.326655883789062500e+02 -5.775000000000000000e+01 4.925000000000000000e+01
3.900000000000000000e+01 9.926692307692306940e+02 5.766830444335937500e+02 2.667694091796875000e+00 0.000000000000000000e+00 0.000000000000000000e+00 1.970360107421875000e+03 1.938250780105590820e+00 3.000000000000000000e+00 7.604179382324218750e+01 -5.725000000000000000e+01 4.925000000000000000e+01
5.400000000000000000e+01 1.011946153846153607e+03 5.690430297851562500e+02 2.664093017578125000e+00 0.000000000000000000e+00 0.000000000000000000e+00 1.966878295898437500e+03 1.882570624351501465e+00 4.000000000000000000e+00 4.239625854492187500e+02 -5.675000000000000000e+01 4.925000000000000000e+01
5.700000000000000000e+01 9.954384615384619792e+02 5.529704589843750000e+02 2.660491943359375000e+00 0.000000000000000000e+00 0.000000000000000000e+00 1.963396484375000000e+03 1.834379076957702637e+00 4.000000000000000000e+00 2.131301879882812500e+02 -5.625000000000000000e+01 4.925000000000000000e+01
5.800000000000000000e+01 1.063192307692308532e+03 5.699420166015625000e+02 2.985900878906250000e+00 0.000000000000000000e+00 0.000000000000000000e+00 1.978604736328125000e+03 2.018409252166748047e+00 4.000000000000000000e+00 5.556027603149414062e+01 -5.475000000000000000e+01 4.925000000000000000e+01
5.000000000000000000e+01 1.000115384615384642e+03 5.864233398437500000e+02 3.111480712890625000e+00 0.000000000000000000e+00 0.000000000000000000e+00 1.971827270507812500e+03 2.007260799407958984e+00 4.000000000000000000e+00 9.089691925048828125e+01 -5.425000000000000000e+01 4.925000000000000000e+01
3.200000000000000000e+01 2.942007692307689922e+03 6.673110351562500000e+02 6.458679199218750000e+00 0.000000000000000000e+00 0.000000000000000000e+00 2.722488525390625000e+03 2.170758008956909180e+00 3.000000000000000000e+00 5.942215576171875000e+02 -1.262500000000000000e+02 4.975000000000000000e+01
5.000000000000000000e+01 2.559846153846153811e+03 6.338645019531250000e+02 5.743194580078125000e+00 0.000000000000000000e+00 0.000000000000000000e+00 2.550456054687500000e+03 2.007924556732177734e+00 4.000000000000000000e+00 1.009400939941406250e+03 -1.257500000000000000e+02 4.975000000000000000e+01
6.400000000000000000e+01 2.239315384615384119e+03 6.496173095703125000e+02 1.268157958984375000e+00 0.000000000000000000e+00 2.352941185235977173e-01 1.684032836914062500e+03 1.996050596237182617e+00 4.000000000000000000e+00 1.203685058593750000e+03 -1.232500000000000000e+02 4.975000000000000000e+01
6.900000000000000000e+01 2.013330769230769420e+03 6.548679809570312500e+02 1.109802246093750000e+00 0.000000000000000000e+00 0.000000000000000000e+00 1.738810668945312500e+03 1.875937461853027344e+00 4.000000000000000000e+00 8.625964355468750000e+02 -1.227500000000000000e+02 4.975000000000000000e+01
6.000000000000000000e+01 1.742376923076922822e+03 6.325602416992187500e+02 9.514770507812500000e-01 0.000000000000000000e+00 0.000000000000000000e+00 1.793588500976562500e+03 1.975916266441345215e+00 4.000000000000000000e+00 5.285336914062500000e+02 -1.222500000000000000e+02 4.975000000000000000e+01
5.400000000000000000e+01 1.265061538461539158e+03 6.025198974609375000e+02 7.646789550781250000e-01 0.000000000000000000e+00 0.000000000000000000e+00 1.832276367187500000e+03 2.001744747161865234e+00 4.000000000000000000e+00 1.455017333984375000e+03 -1.217500000000000000e+02 4.975000000000000000e+01
5.300000000000000000e+01 8.490230769230770420e+02 5.791218261718750000e+02 4.923706054687500000e-01 0.000000000000000000e+00 5.294117927551269531e-01 1.822694580078125000e+03 1.963298082351684570e+00 4.000000000000000000e+00 1.258062011718750000e+03 -1.212500000000000000e+02 4.975000000000000000e+01
5.100000000000000000e+01 5.830384615384614335e+02 3.827098083496093750e+02 2.200927734375000000e-01 0.000000000000000000e+00 5.882353186607360840e-01 1.813112670898437500e+03 1.880426645278930664e+00 4.000000000000000000e+00 1.096753784179687500e+03 -1.207500000000000000e+02 4.975000000000000000e+01
2.000000000000000000e+01 5.755461538461538566e+02 1.712902526855468750e+02 -5.218505859375000000e-02 0.000000000000000000e+00 0.000000000000000000e+00 1.803530761718750000e+03 1.849175333976745605e+00 3.000000000000000000e+00 1.386848754882812500e+03 -1.202500000000000000e+02 4.975000000000000000e+01
5.300000000000000000e+01 6.648769230769228216e+02 2.196096038818359375e+02 -6.083984375000000000e-01 0.000000000000000000e+00 7.647058963775634766e-01 1.758286499023437500e+03 1.858331799507141113e+00 4.000000000000000000e+00 1.409815551757812500e+03 -1.192500000000000000e+02 4.975000000000000000e+01
4.000000000000000000e+01 8.916307692307696016e+02 2.893160095214843750e+02 -8.884582519531250000e-01 0.000000000000000000e+00 5.294117927551269531e-01 1.731317749023437500e+03 1.796970009803771973e+00 3.000000000000000000e+00 1.217687500000000000e+03 -1.187500000000000000e+02 4.975000000000000000e+01
4.800000000000000000e+01 1.072330769230769647e+03 3.238866577148437500e+02 -1.168487548828125000e+00 0.000000000000000000e+00 0.000000000000000000e+00 1.704348876953125000e+03 1.786870121955871582e+00 4.000000000000000000e+00 1.310779541015625000e+03 -1.182500000000000000e+02 4.975000000000000000e+01
8.000000000000000000e+00 1.248592307692307713e+03 2.924648742675781250e+02 -1.362609863281250000e+00 1.353950351476669312e-01 2.352941185235977173e-01 1.668666259765625000e+03 1.773384690284729004e+00 1.000000000000000000e+00 1.635295776367187500e+03 -1.177500000000000000e+02 4.975000000000000000e+01
7.000000000000000000e+00 1.244538461538461434e+03 3.373269042968750000e+02 -1.528045654296875000e+00 9.999999776482582092e-03 5.294117927551269531e-01 1.630079223632812500e+03 1.726416230201721191e+00 1.000000000000000000e+00 1.939585571289062500e+03 -1.172500000000000000e+02 4.975000000000000000e+01
1.600000000000000000e+01 1.213769230769230717e+03 3.495812072753906250e+02 -1.693511962890625000e+00 1.515055745840072632e-01 0.000000000000000000e+00 1.591492187500000000e+03 1.583306789398193359e+00 3.000000000000000000e+00 1.848745849609375000e+03 -1.167500000000000000e+02 4.975000000000000000e+01
1.900000000000000000e+01 5.814692307692307622e+02 2.438807830810546875e+02 -1.482269287109375000e+00 0.000000000000000000e+00 2.352941185235977173e-01 1.651332519531250000e+03 1.825410604476928711e+00 3.000000000000000000e+00 8.267398071289062500e+02 -1.157500000000000000e+02 4.975000000000000000e+01
4.800000000000000000e+01 7.085615384615383618e+02 3.125763854980468750e+02 -1.105590820312500000e+00 0.000000000000000000e+00 0.000000000000000000e+00 1.749760131835937500e+03 1.686872363090515137e+00 4.000000000000000000e+00 1.682000000000000000e+03 -1.152500000000000000e+02 4.975000000000000000e+01
5.700000000000000000e+01 6.192307692307691696e+02 3.693641357421875000e+02 -7.289123535156250000e-01 9.999999776482582092e-03 4.705882370471954346e-01 1.848187622070312500e+03 1.695163369178771973e+00 4.000000000000000000e+00 1.624541015625000000e+03 -1.147500000000000000e+02 4.975000000000000000e+01
5.000000000000000000e+00 5.549769230769228443e+02 3.109126586914062500e+02 -3.319702148437500000e-01 0.000000000000000000e+00 0.000000000000000000e+00 1.950570190429687500e+03 1.748887896537780762e+00 1.000000000000000000e+00 1.507592773437500000e+03 -1.142500000000000000e+02 4.975000000000000000e+01
8.000000000000000000e+00 4.150615384615387029e+02 2.784004821777343750e+02 1.257629394531250000e-01 0.000000000000000000e+00 2.352941185235977173e-01 2.064817871093750000e+03 8.563712835311889648e-01 1.000000000000000000e+00 1.302974975585937500e+03 -1.137500000000000000e+02 4.975000000000000000e+01
4.000000000000000000e+00 3.538461538461539817e+02 2.177450714111328125e+02 5.834960937500000000e-01 0.000000000000000000e+00 6.470588445663452148e-01 2.179065429687500000e+03 1.664642095565795898e+00 1.000000000000000000e+00 9.436068725585937500e+02 -1.132500000000000000e+02 4.975000000000000000e+01
4.000000000000000000e+00 2.984692307692307054e+02 1.621709136962890625e+02 1.485839843750000000e+00 0.000000000000000000e+00 2.941176593303680420e-01 2.410837402343750000e+03 3.593159675598144531e+00 1.000000000000000000e+00 8.275535278320312500e+02 -1.122500000000000000e+02 4.975000000000000000e+01
6.000000000000000000e+00 2.866769230769228329e+02 1.410528717041015625e+02 1.917327880859375000e+00 0.000000000000000000e+00 8.823529481887817383e-01 2.531638916015625000e+03 3.633001804351806641e+00 1.000000000000000000e+00 8.178747558593750000e+02 -1.117500000000000000e+02 4.975000000000000000e+01
0.000000000000000000e+00 3.018230769230768260e+02 1.297839355468750000e+02 2.348815917968750000e+00 0.000000000000000000e+00 1.352941155433654785e+00 2.652440429687500000e+03 3.647546052932739258e+00 1.000000000000000000e+00 8.438831176757812500e+02 -1.112500000000000000e+02 4.975000000000000000e+01
5.000000000000000000e+00 3.116923076923076792e+02 1.367976989746093750e+02 2.780273437500000000e+00 0.000000000000000000e+00 5.882353186607360840e-01 2.773241943359375000e+03 3.564477920532226562e+00 1.000000000000000000e+00 9.314620361328125000e+02 -1.107500000000000000e+02 4.975000000000000000e+01
3.000000000000000000e+00 3.271846153846154266e+02 1.733813323974609375e+02 3.007293701171875000e+00 0.000000000000000000e+00 2.941176593303680420e-01 2.852244873046875000e+03 3.424832582473754883e+00 1.000000000000000000e+00 1.084347900390625000e+03 -1.102500000000000000e+02 4.975000000000000000e+01
6.000000000000000000e+00 3.508384615384616723e+02 2.418074493408203125e+02 3.166107177734375000e+00 0.000000000000000000e+00 7.647058963775634766e-01 2.917314941406250000e+03 3.369944810867309570e+00 1.000000000000000000e+00 9.389586181640625000e+02 -1.097500000000000000e+02 4.975000000000000000e+01
3.100000000000000000e+01 3.941923076923076223e+02 2.399784393310546875e+02 3.324951171875000000e+00 0.000000000000000000e+00 0.000000000000000000e+00 2.982385009765625000e+03 3.334865331649780273e+00 3.000000000000000000e+00 1.149253417968750000e+03 -1.092500000000000000e+02 4.975000000000000000e+01
3.000000000000000000e+00 3.973230769230768828e+02 1.776972351074218750e+02 3.483795166015625000e+00 0.000000000000000000e+00 2.352941185235977173e-01 3.047455078125000000e+03 3.339566230773925781e+00 1.000000000000000000e+00 1.056739746093750000e+03 -1.087500000000000000e+02 4.975000000000000000e+01
0.000000000000000000e+00 3.530384615384616609e+02 1.554290924072265625e+02 3.308441162109375000e+00 0.000000000000000000e+00 0.000000000000000000e+00 3.040094970703125000e+03 3.380276679992675781e+00 1.000000000000000000e+00 9.110614624023437500e+02 -1.082500000000000000e+02 4.975000000000000000e+01
4.000000000000000000e+00 3.001846153846154834e+02 1.657213134765625000e+02 3.133087158203125000e+00 0.000000000000000000e+00 0.000000000000000000e+00 3.032734863281250000e+03 3.434383869171142578e+00 1.000000000000000000e+00 7.974722900390625000e+02 -1.077500000000000000e+02 4.975000000000000000e+01
1.000000000000000000e+00 3.431307692307691468e+02 1.892990722656250000e+02 2.745391845703125000e+00 0.000000000000000000e+00 0.000000000000000000e+00 3.008269531250000000e+03 3.503910541534423828e+00 1.000000000000000000e+00 7.530905761718750000e+02 -1.067500000000000000e+02 4.975000000000000000e+01
1.000000000000000000e+00 3.610769230769229239e+02 1.895960845947265625e+02 2.098876953125000000e+00 0.000000000000000000e+00 0.000000000000000000e+00 2.915589843750000000e+03 3.494707345962524414e+00 1.000000000000000000e+00 6.831687011718750000e+02 -1.057500000000000000e+02 4.975000000000000000e+01
4.000000000000000000e+01 4.574692307692309896e+02 2.271932830810546875e+02 8.385009765625000000e-01 0.000000000000000000e+00 0.000000000000000000e+00 2.745104980468750000e+03 3.424227237701416016e+00 3.000000000000000000e+00 7.370426635742187500e+02 -1.022500000000000000e+02 4.975000000000000000e+01
2.800000000000000000e+01 5.458846153846155858e+02 2.751961059570312500e+02 1.220703125000000000e+00 0.000000000000000000e+00 5.882353186607360840e-01 2.809464111328125000e+03 3.544561862945556641e+00 3.000000000000000000e+00 3.664909362792968750e+02 -9.925000000000000000e+01 4.975000000000000000e+01
4.700000000000000000e+01 6.080692307692308987e+02 2.728659057617187500e+02 6.387023925781250000e-01 0.000000000000000000e+00 0.000000000000000000e+00 2.702358154296875000e+03 1.353362083435058594e+00 4.000000000000000000e+00 2.861039428710937500e+02 -9.625000000000000000e+01 4.975000000000000000e+01
6.400000000000000000e+01 6.003153846153848008e+02 2.573985595703125000e+02 4.609375000000000000e-01 0.000000000000000000e+00 3.529411852359771729e-01 2.668237548828125000e+03 2.811593770980834961e+00 4.000000000000000000e+00 3.082296447753906250e+02 -9.575000000000000000e+01 4.975000000000000000e+01
2.500000000000000000e+01 6.319846153846154948e+02 2.678446655273437500e+02 2.794494628906250000e-01 0.000000000000000000e+00 0.000000000000000000e+00 2.630720214843750000e+03 1.981481075286865234e+00 3.000000000000000000e+00 3.532848510742187500e+02 -9.525000000000000000e+01 4.975000000000000000e+01
5.400000000000000000e+01 7.042923076923073040e+02 3.560596008300781250e+02 -8.602905273437500000e-02 0.000000000000000000e+00 0.000000000000000000e+00 2.553421142578125000e+03 2.221317291259765625e+00 4.000000000000000000e+00 3.680946044921875000e+02 -9.425000000000000000e+01 4.975000000000000000e+01
5.200000000000000000e+01 7.693461538461535838e+02 3.687180786132812500e+02 -3.121032714843750000e-01 0.000000000000000000e+00 0.000000000000000000e+00 2.490046630859375000e+03 1.696764111518859863e+00 4.000000000000000000e+00 3.764473876953125000e+02 -9.325000000000000000e+01 4.975000000000000000e+01
5.900000000000000000e+01 8.092923076923082135e+02 3.804216308593750000e+02 -4.100341796875000000e-01 0.000000000000000000e+00 0.000000000000000000e+00 2.420236328125000000e+03 2.130308628082275391e+00 4.000000000000000000e+00 4.108291015625000000e+02 -9.175000000000000000e+01 4.975000000000000000e+01
3.200000000000000000e+01 8.251230769230770647e+02 3.734816589355468750e+02 -3.251342773437500000e-01 0.000000000000000000e+00 0.000000000000000000e+00 2.412970947265625000e+03 1.226900100708007812e+00 3.000000000000000000e+00 4.232942199707031250e+02 -9.125000000000000000e+01 4.975000000000000000e+01
6.300000000000000000e+01 8.269923076923078042e+02 3.586122436523437500e+02 -1.553039550781250000e-01 0.000000000000000000e+00 0.000000000000000000e+00 2.398439697265625000e+03 2.016369819641113281e+00 4.000000000000000000e+00 4.526364440917968750e+02 -9.025000000000000000e+01 4.975000000000000000e+01
3.400000000000000000e+01 8.188230769230772239e+02 3.442863464355468750e+02 -1.107482910156250000e-01 0.000000000000000000e+00 2.941176593303680420e-01 2.353338867187500000e+03 1.999331474304199219e+00 3.000000000000000000e+00 4.422583923339843750e+02 -8.975000000000000000e+01 4.975000000000000000e+01
6.700000000000000000e+01 7.867846153846151083e+02 3.701720581054687500e+02 -1.309204101562500000e-01 0.000000000000000000e+00 0.000000000000000000e+00 2.127083251953125000e+03 1.936460852622985840e+00 4.000000000000000000e+00 3.417568054199218750e+02 -8.775000000000000000e+01 4.975000000000000000e+01
3.800000000000000000e+01 7.707230769230767464e+02 3.897144165039062500e+02 -1.762390136718750000e-01 0.000000000000000000e+00 0.000000000000000000e+00 2.184799316406250000e+03 1.961840748786926270e+00 3.000000000000000000e+00 3.567284545898437500e+02 -8.725000000000000000e+01 4.975000000000000000e+01
6.000000000000000000e+01 7.631307692307693742e+02 3.979988098144531250e+02 -2.215270996093750000e-01 0.000000000000000000e+00 0.000000000000000000e+00 2.242515380859375000e+03 1.967552900314331055e+00 4.000000000000000000e+00 3.391959838867187500e+02 -8.675000000000000000e+01 4.975000000000000000e+01
3.800000000000000000e+01 7.690076923076923094e+02 4.022672729492187500e+02 -2.668457031250000000e-01 0.000000000000000000e+00 0.000000000000000000e+00 2.300231445312500000e+03 1.989164829254150391e+00 3.000000000000000000e+00 3.352409362792968750e+02 -8.625000000000000000e+01 4.975000000000000000e+01
3.000000000000000000e+01 7.343230769230768828e+02 4.037969360351562500e+02 -6.035156250000000000e-01 0.000000000000000000e+00 0.000000000000000000e+00 2.277732177734375000e+03 1.254659652709960938e+00 3.000000000000000000e+00 2.367754821777343750e+02 -8.525000000000000000e+01 4.975000000000000000e+01
5.700000000000000000e+01 7.155846153846157449e+02 4.018311767578125000e+02 -7.718505859375000000e-01 0.000000000000000000e+00 0.000000000000000000e+00 2.266482421875000000e+03 8.211613893508911133e-01 4.000000000000000000e+00 2.609778137207031250e+02 -8.475000000000000000e+01 4.975000000000000000e+01
4.300000000000000000e+01 7.747692307692303757e+02 4.121931762695312500e+02 -1.013275146484375000e+00 0.000000000000000000e+00 0.000000000000000000e+00 2.251428955078125000e+03 1.021412968635559082e+00 3.000000000000000000e+00 2.494102630615234375e+02 -8.375000000000000000e+01 4.975000000000000000e+01
6.800000000000000000e+01 8.006769230769233445e+02 4.253648681640625000e+02 -1.105407714843750000e+00 0.000000000000000000e+00 0.000000000000000000e+00 2.246135986328125000e+03 1.852591872215270996e+00 4.000000000000000000e+00 2.247770538330078125e+02 -8.325000000000000000e+01 4.975000000000000000e+01
6.400000000000000000e+01 7.995076923076920821e+02 4.360359191894531250e+02 -1.197540283203125000e+00 0.000000000000000000e+00 0.000000000000000000e+00 2.240843017578125000e+03 2.027420520782470703e+00 4.000000000000000000e+00 2.343563842773437500e+02 -8.275000000000000000e+01 4.975000000000000000e+01
5.700000000000000000e+01 7.812230769230772012e+02 4.381923217773437500e+02 -1.256927490234375000e+00 0.000000000000000000e+00 0.000000000000000000e+00 2.236559326171875000e+03 2.027818918228149414e+00 4.000000000000000000e+00 2.167595672607421875e+02 -8.225000000000000000e+01 4.975000000000000000e+01
3.800000000000000000e+01 8.048923076923080089e+02 4.367010192871093750e+02 -1.283569335937500000e+00 0.000000000000000000e+00 0.000000000000000000e+00 2.233285156250000000e+03 2.011918067932128906e+00 3.000000000000000000e+00 2.290163726806640625e+02 -8.175000000000000000e+01 4.975000000000000000e+01
5.600000000000000000e+01 7.781461538461536520e+02 4.373389282226562500e+02 -1.310211181640625000e+00 9.999999776482582092e-03 0.000000000000000000e+00 2.230010742187500000e+03 2.002232551574707031e+00 4.000000000000000000e+00 2.536879425048828125e+02 -8.125000000000000000e+01 4.975000000000000000e+01
6.700000000000000000e+01 7.955615384615387029e+02 4.394438781738281250e+02 -1.336853027343750000e+00 9.999999776482582092e-03 0.000000000000000000e+00 2.226736328125000000e+03 1.982048749923706055e+00 4.000000000000000000e+00 2.785103149414062500e+02 -8.075000000000000000e+01 4.975000000000000000e+01
4.800000000000000000e+01 8.109846153846156085e+02 4.451577148437500000e+02 -1.362884521484375000e+00 9.999999776482582092e-03 0.000000000000000000e+00 2.215592041015625000e+03 1.960560798645019531e+00 4.000000000000000000e+00 3.042842407226562500e+02 -8.025000000000000000e+01 4.975000000000000000e+01
6.200000000000000000e+01 7.834000000000002046e+02 4.496529541015625000e+02 -1.388732910156250000e+00 9.999999776482582092e-03 0.000000000000000000e+00 2.201823974609375000e+03 1.965013027191162109e+00 4.000000000000000000e+00 3.065294799804687500e+02 -7.975000000000000000e+01 4.975000000000000000e+01
2.200000000000000000e+01 7.979076923076930825e+02 4.494380187988281250e+02 -1.414550781250000000e+00 9.999999776482582092e-03 5.882352963089942932e-02 2.188056152343750000e+03 1.951460123062133789e+00 3.000000000000000000e+00 2.664639587402343750e+02 -7.925000000000000000e+01 4.975000000000000000e+01
5.000000000000000000e+01 8.156461538461541068e+02 4.473569335937500000e+02 -1.440399169921875000e+00 9.999999776482582092e-03 0.000000000000000000e+00 2.174288330078125000e+03 1.939147353172302246e+00 4.000000000000000000e+00 2.794148559570312500e+02 -7.875000000000000000e+01 4.975000000000000000e+01
6.000000000000000000e+01 8.192230769230772012e+02 4.439325561523437500e+02 -1.507812500000000000e+00 9.999999776482582092e-03 0.000000000000000000e+00 2.146956787109375000e+03 1.939950585365295410e+00 4.000000000000000000e+00 2.680431823730468750e+02 -7.825000000000000000e+01 4.975000000000000000e+01
5.200000000000000000e+01 8.235615384615383618e+02 4.411619873046875000e+02 -1.575256347656250000e+00 9.999999776482582092e-03 0.000000000000000000e+00 2.119625000000000000e+03 1.946288347244262695e+00 4.000000000000000000e+00 2.683289489746093750e+02 -7.775000000000000000e+01 4.975000000000000000e+01
4.400000000000000000e+01 8.403076923076927187e+02 4.577183532714843750e+02 -1.807769775390625000e+00 9.999999776482582092e-03 0.000000000000000000e+00 2.035338500976562500e+03 1.958413243293762207e+00 3.000000000000000000e+00 3.020298156738281250e+02 -7.625000000000000000e+01 4.975000000000000000e+01
6.000000000000000000e+01 8.437307692307695106e+02 4.807890014648437500e+02 -1.899383544921875000e+00 9.999999776482582092e-03 0.000000000000000000e+00 2.006173461914062500e+03 1.962711095809936523e+00 4.000000000000000000e+00 3.306724243164062500e+02 -7.575000000000000000e+01 4.975000000000000000e+01
5.600000000000000000e+01 8.969461538461536065e+02 5.026189880371093750e+02 -2.072387695312500000e+00 9.999999776482582092e-03 0.000000000000000000e+00 1.951080200195312500e+03 1.934033989906311035e+00 4.000000000000000000e+00 3.816011657714843750e+02 -7.475000000000000000e+01 4.975000000000000000e+01
4.200000000000000000e+01 8.494923076923071221e+02 4.739324035644531250e+02 -2.214691162109375000e+00 9.999999776482582092e-03 0.000000000000000000e+00 1.905697509765625000e+03 1.947341084480285645e+00 3.000000000000000000e+00 4.533539428710937500e+02 -7.375000000000000000e+01 4.975000000000000000e+01
4.500000000000000000e+01 8.595846153846155175e+02 4.435782775878906250e+02 -2.285827636718750000e+00 9.999999776482582092e-03 8.823529481887817383e-01 1.883006103515625000e+03 1.951697826385498047e+00 4.000000000000000000e+00 3.982277526855468750e+02 -7.325000000000000000e+01 4.975000000000000000e+01
4.700000000000000000e+01 8.707461538461537884e+02 4.408283691406250000e+02 -2.299407958984375000e+00 9.999999776482582092e-03 9.411764740943908691e-01 1.869687377929687500e+03 1.957413792610168457e+00 4.000000000000000000e+00 3.992044067382812500e+02 -7.275000000000000000e+01 4.975000000000000000e+01
6.200000000000000000e+01 9.015230769230771557e+02 4.548774414062500000e+02 -2.293792724609375000e+00 9.999999776482582092e-03 8.823529481887817383e-01 1.859492797851562500e+03 1.279251337051391602e+00 4.000000000000000000e+00 4.625705566406250000e+02 -7.225000000000000000e+01 4.975000000000000000e+01
6.300000000000000000e+01 1.002930769230768647e+03 4.679006347656250000e+02 -2.282592773437500000e+00 9.999999776482582092e-03 0.000000000000000000e+00 1.839103515625000000e+03 1.892206907272338867e+00 4.000000000000000000e+00 3.762293090820312500e+02 -7.125000000000000000e+01 4.975000000000000000e+01
5.800000000000000000e+01 1.013338461538461843e+03 4.781552429199218750e+02 -2.172180175781250000e+00 9.999999776482582092e-03 2.941176593303680420e-01 1.846230346679687500e+03 1.905971765518188477e+00 4.000000000000000000e+00 4.203083496093750000e+02 -7.025000000000000000e+01 4.975000000000000000e+01
5.300000000000000000e+01 1.021176923076923003e+03 4.911379089355468750e+02 -2.116973876953125000e+00 9.999999776482582092e-03 0.000000000000000000e+00 1.849793701171875000e+03 1.915084004402160645e+00 4.000000000000000000e+00 4.721861877441406250e+02 -6.975000000000000000e+01 4.975000000000000000e+01
4.700000000000000000e+01 1.063730769230769283e+03 4.922623596191406250e+02 -2.039581298828125000e+00 9.999999776482582092e-03 0.000000000000000000e+00 1.857255615234375000e+03 1.918782591819763184e+00 4.000000000000000000e+00 4.650480957031250000e+02 -6.925000000000000000e+01 4.975000000000000000e+01
5.800000000000000000e+01 1.112469230769230762e+03 5.017611083984375000e+02 -1.895660400390625000e+00 9.999999776482582092e-03 0.000000000000000000e+00 1.876413208007812500e+03 1.481661796569824219e+00 4.000000000000000000e+00 3.908692932128906250e+02 -6.875000000000000000e+01 4.975000000000000000e+01
6.900000000000000000e+01 1.151569230769230671e+03 5.096612548828125000e+02 -1.751739501953125000e+00 0.000000000000000000e+00 0.000000000000000000e+00 1.895570800781250000e+03 1.205775856971740723e+00 4.000000000000000000e+00 2.400180816650390625e+02 -6.825000000000000000e+01 4.975000000000000000e+01
5.200000000000000000e+01 1.183307692307692150e+03 5.241023559570312500e+02 -1.607788085937500000e+00 9.999999776482582092e-03 0.000000000000000000e+00 1.914728393554687500e+03 8.845574855804443359e-01 4.000000000000000000e+00 3.959343872070312500e+02 -6.775000000000000000e+01 4.975000000000000000e+01
3.600000000000000000e+01 1.102038461538461206e+03 5.454369506835937500e+02 2.111419677734375000e+00 0.000000000000000000e+00 0.000000000000000000e+00 1.801293579101562500e+03 1.417906641960144043e+00 3.000000000000000000e+00 4.213221435546875000e+02 -5.725000000000000000e+01 4.975000000000000000e+01
6.100000000000000000e+01 1.013200000000000045e+03 4.674744873046875000e+02 2.129089355468750000e+00 0.000000000000000000e+00 0.000000000000000000e+00 1.778884765625000000e+03 1.911160230636596680e+00 4.000000000000000000e+00 2.192006835937500000e+02 -5.625000000000000000e+01 4.975000000000000000e+01
7.300000000000000000e+01 2.870369230769229489e+03 6.148876342773437500e+02 6.150512695312500000e+00 0.000000000000000000e+00 0.000000000000000000e+00 2.578260253906250000e+03 2.173938989639282227e+00 4.000000000000000000e+00 2.432498931884765625e+02 -1.267500000000000000e+02 5.025000000000000000e+01
7.400000000000000000e+01 2.640715384615384664e+03 5.950632934570312500e+02 5.297119140625000000e+00 0.000000000000000000e+00 0.000000000000000000e+00 2.384083740234375000e+03 2.148564100265502930e+00 4.000000000000000000e+00 9.570910644531250000e+02 -1.262500000000000000e+02 5.025000000000000000e+01
5.200000000000000000e+01 2.327615384615382482e+03 5.559967041015625000e+02 4.443695068359375000e+00 0.000000000000000000e+00 2.352941185235977173e-01 2.189907470703125000e+03 2.292443752288818359e+00 4.000000000000000000e+00 3.028094177246093750e+02 -1.257500000000000000e+02 5.025000000000000000e+01
1.000000000000000000e+01 1.470930769230769329e+03 5.266267700195312500e+02 6.833496093750000000e-01 0.000000000000000000e+00 0.000000000000000000e+00 1.356520629882812500e+03 2.041276931762695312e+00 3.000000000000000000e+00 9.905062866210937500e+02 -1.242500000000000000e+02 5.025000000000000000e+01
3.200000000000000000e+01 1.527446153846153720e+03 6.423146362304687500e+02 -6.083679199218750000e-01 9.999999776482582092e-03 0.000000000000000000e+00 1.196151977539062500e+03 1.563995480537414551e+00 3.000000000000000000e+00 1.764387329101562500e+03 -1.232500000000000000e+02 5.025000000000000000e+01
6.900000000000000000e+01 1.365423076923077588e+03 6.063610229492187500e+02 -6.102600097656250000e-01 0.000000000000000000e+00 5.294117927551269531e-01 1.321180664062500000e+03 1.642556309700012207e+00 4.000000000000000000e+00 1.657941040039062500e+03 -1.227500000000000000e+02 5.025000000000000000e+01
1.100000000000000000e+01 1.183300000000000182e+03 5.178111572265625000e+02 -6.121826171875000000e-01 9.999999776482582092e-03 0.000000000000000000e+00 1.446209350585937500e+03 1.654390335083007812e+00 3.000000000000000000e+00 1.736146972656250000e+03 -1.222500000000000000e+02 5.025000000000000000e+01
1.100000000000000000e+01 8.526692307692309214e+02 3.330796203613281250e+02 -6.824951171875000000e-01 9.999999776482582092e-03 7.647058963775634766e-01 1.538495605468750000e+03 1.785048365592956543e+00 3.000000000000000000e+00 1.563198242187500000e+03 -1.217500000000000000e+02 5.025000000000000000e+01
3.100000000000000000e+01 4.935076923076919684e+02 3.199373779296875000e+02 -9.580993652343750000e-01 0.000000000000000000e+00 1.000000000000000000e+00 1.532555053710937500e+03 1.944698810577392578e+00 3.000000000000000000e+00 1.152114257812500000e+03 -1.212500000000000000e+02 5.025000000000000000e+01
5.700000000000000000e+01 4.077384615384614222e+02 2.626076354980468750e+02 -1.233703613281250000e+00 0.000000000000000000e+00 0.000000000000000000e+00 1.526614379882812500e+03 1.957157492637634277e+00 4.000000000000000000e+00 1.383616088867187500e+03 -1.207500000000000000e+02 5.025000000000000000e+01
5.100000000000000000e+01 4.023923076923076678e+02 1.543791351318359375e+02 -1.509338378906250000e+00 0.000000000000000000e+00 0.000000000000000000e+00 1.520673706054687500e+03 1.969943642616271973e+00 4.000000000000000000e+00 1.267306762695312500e+03 -1.202500000000000000e+02 5.025000000000000000e+01
6.600000000000000000e+01 5.856538461538465299e+02 1.844733123779296875e+02 -1.789703369140625000e+00 9.999999776482582092e-03 0.000000000000000000e+00 1.507085449218750000e+03 2.006231546401977539e+00 4.000000000000000000e+00 1.507128662109375000e+03 -1.197500000000000000e+02 5.025000000000000000e+01
1.200000000000000000e+01 4.914384615384614108e+02 2.316369018554687500e+02 -2.074859619140625000e+00 0.000000000000000000e+00 5.294117927551269531e-01 1.485849365234375000e+03 2.165812730789184570e+00 3.000000000000000000e+00 4.548609008789062500e+02 -1.192500000000000000e+02 5.025000000000000000e+01
5.500000000000000000e+01 7.797769230769234809e+02 3.437623596191406250e+02 -2.359985351562500000e+00 0.000000000000000000e+00 3.529411852359771729e-01 1.464613403320312500e+03 2.033807754516601562e+00 4.000000000000000000e+00 9.100161743164062500e+02 -1.187500000000000000e+02 5.025000000000000000e+01
3.000000000000000000e+01 1.172892307692307213e+03 4.666668395996093750e+02 -2.645141601562500000e+00 9.999999776482582092e-03 2.352941185235977173e-01 1.443377319335937500e+03 1.874020218849182129e+00 3.000000000000000000e+00 1.913094116210937500e+03 -1.182500000000000000e+02 5.025000000000000000e+01
7.800000000000000000e+01 1.201153846153846189e+03 5.088426818847656250e+02 -2.782409667968750000e+00 0.000000000000000000e+00 5.882353186607360840e-01 1.411589599609375000e+03 1.847207665443420410e+00 4.000000000000000000e+00 8.480570678710937500e+02 -1.177500000000000000e+02 5.025000000000000000e+01
3.400000000000000000e+01 5.995846153846151765e+02 2.821731872558593750e+02 -2.497894287109375000e+00 0.000000000000000000e+00 0.000000000000000000e+00 1.442255615234375000e+03 1.674481749534606934e+00 3.000000000000000000e+00 1.626828979492187500e+03 -1.157500000000000000e+02 5.025000000000000000e+01
5.100000000000000000e+01 7.331615384615384983e+02 2.729412536621093750e+02 -1.949401855468750000e+00 9.999999776482582092e-03 3.529411852359771729e-01 1.578836914062500000e+03 1.487687706947326660e+00 4.000000000000000000e+00 1.581397583007812500e+03 -1.152500000000000000e+02 5.025000000000000000e+01
6.000000000000000000e+00 3.870307692307694651e+02 2.203166656494140625e+02 -3.101501464843750000e-01 0.000000000000000000e+00 0.000000000000000000e+00 1.983904174804687500e+03 8.540944457054138184e-01 1.000000000000000000e+00 1.070752929687500000e+03 -1.137500000000000000e+02 5.025000000000000000e+01
1.000000000000000000e+00 3.458384615384616723e+02 2.014285583496093750e+02 2.333984375000000000e-01 0.000000000000000000e+00 0.000000000000000000e+00 2.116744140625000000e+03 2.910062551498413086e+00 1.000000000000000000e+00 9.763724975585937500e+02 -1.132500000000000000e+02 5.025000000000000000e+01
0.000000000000000000e+00 3.328153846153846303e+02 1.608422088623046875e+02 7.769470214843750000e-01 0.000000000000000000e+00 0.000000000000000000e+00 2.249583984375000000e+03 3.510157108306884766e+00 1.000000000000000000e+00 8.917919311523437500e+02 -1.127500000000000000e+02 5.025000000000000000e+01
4.000000000000000000e+00 3.021846153846153129e+02 1.351884765625000000e+02 1.262756347656250000e+00 0.000000000000000000e+00 2.352941185235977173e-01 2.376276855468750000e+03 3.549906015396118164e+00 1.000000000000000000e+00 7.724171142578125000e+02 -1.122500000000000000e+02 5.025000000000000000e+01
2.000000000000000000e+00 2.855307692307691809e+02 1.086262207031250000e+02 2.118896484375000000e+00 0.000000000000000000e+00 2.352941185235977173e-01 2.617368164062500000e+03 3.623906850814819336e+00 1.000000000000000000e+00 7.539991455078125000e+02 -1.112500000000000000e+02 5.025000000000000000e+01
0.000000000000000000e+00 2.888538461538463480e+02 1.252982635498046875e+02 2.546966552734375000e+00 0.000000000000000000e+00 1.588235259056091309e+00 2.737913818359375000e+03 3.601275205612182617e+00 1.000000000000000000e+00 7.151439819335937500e+02 -1.107500000000000000e+02 5.025000000000000000e+01
1.000000000000000000e+00 2.987461538461538453e+02 1.517259521484375000e+02 2.732330322265625000e+00 0.000000000000000000e+00 5.294117927551269531e-01 2.808100830078125000e+03 3.556640386581420898e+00 1.000000000000000000e+00 7.912818603515625000e+02 -1.102500000000000000e+02 5.025000000000000000e+01
1.000000000000000000e+00 3.230999999999998522e+02 1.848735198974609375e+02 2.836761474609375000e+00 0.000000000000000000e+00 0.000000000000000000e+00 2.861501708984375000e+03 3.540634393692016602e+00 1.000000000000000000e+00 7.541359252929687500e+02 -1.097500000000000000e+02 5.025000000000000000e+01
4.000000000000000000e+00 3.402846153846156767e+02 2.012303466796875000e+02 2.941223144531250000e+00 0.000000000000000000e+00 5.882352963089942932e-02 2.914902832031250000e+03 3.534353494644165039e+00 1.000000000000000000e+00 7.150734863281250000e+02 -1.092500000000000000e+02 5.025000000000000000e+01
4.000000000000000000e+00 3.160153846153846757e+02 1.694391784667968750e+02 2.825256347656250000e+00 0.000000000000000000e+00 0.000000000000000000e+00 2.952128662109375000e+03 3.486744642257690430e+00 1.000000000000000000e+00 7.530700683593750000e+02 -1.082500000000000000e+02 5.025000000000000000e+01
5.000000000000000000e+00 3.318692307692307395e+02 1.838915405273437500e+02 2.384399414062500000e+00 0.000000000000000000e+00 0.000000000000000000e+00 2.919778564453125000e+03 3.495410442352294922e+00 1.000000000000000000e+00 7.526983032226562500e+02 -1.072500000000000000e+02 5.025000000000000000e+01
5.000000000000000000e+00 3.369769230769229011e+02 1.835867462158203125e+02 2.137145996093750000e+00 0.000000000000000000e+00 0.000000000000000000e+00 2.896001708984375000e+03 3.509970664978027344e+00 1.000000000000000000e+00 7.228624877929687500e+02 -1.067500000000000000e+02 5.025000000000000000e+01
3.000000000000000000e+00 5.000538461538461661e+02 2.570056457519531250e+02 6.040649414062500000e-01 0.000000000000000000e+00 2.117647171020507812e+00 2.694002929687500000e+03 3.283920526504516602e+00 1.000000000000000000e+00 5.795292358398437500e+02 -1.002500000000000000e+02 5.025000000000000000e+01
5.000000000000000000e+00 5.178076923076923777e+02 2.913845520019531250e+02 7.048950195312500000e-01 0.000000000000000000e+00 1.000000000000000000e+00 2.709289550781250000e+03 3.319294691085815430e+00 1.000000000000000000e+00 5.362920532226562500e+02 -9.975000000000000000e+01 5.025000000000000000e+01
7.000000000000000000e+00 5.623384615384616154e+02 3.082626037597656250e+02 7.152709960937500000e-01 0.000000000000000000e+00 1.352941155433654785e+00 2.711467041015625000e+03 3.498886108398437500e+00 1.000000000000000000e+00 2.693195800781250000e+02 -9.875000000000000000e+01 5.025000000000000000e+01
5.100000000000000000e+01 5.888461538461536975e+02 2.925363159179687500e+02 1.934204101562500000e-01 0.000000000000000000e+00 1.882352948188781738e+00 2.614773925781250000e+03 3.475214004516601562e+00 4.000000000000000000e+00 2.620137329101562500e+02 -9.625000000000000000e+01 5.025000000000000000e+01
3.400000000000000000e+01 5.690769230769235492e+02 2.880419921875000000e+02 3.683471679687500000e-02 0.000000000000000000e+00 0.000000000000000000e+00 2.583526367187500000e+03 1.767179250717163086e+00 3.000000000000000000e+00 2.873534240722656250e+02 -9.575000000000000000e+01 5.025000000000000000e+01
3.600000000000000000e+01 7.404000000000006594e+02 3.587026062011718750e+02 -7.033386230468750000e-01 0.000000000000000000e+00 0.000000000000000000e+00 2.430485351562500000e+03 2.173440694808959961e+00 3.000000000000000000e+00 3.518890686035156250e+02 -9.375000000000000000e+01 5.025000000000000000e+01
5.400000000000000000e+01 7.738538461538462343e+02 3.591781921386718750e+02 -7.624816894531250000e-01 0.000000000000000000e+00 0.000000000000000000e+00 2.405008300781250000e+03 1.475156188011169434e+00 4.000000000000000000e+00 3.879830017089843750e+02 -9.325000000000000000e+01 5.025000000000000000e+01
4.100000000000000000e+01 8.297769230769231399e+02 3.935461120605468750e+02 -8.770446777343750000e-01 0.000000000000000000e+00 0.000000000000000000e+00 2.320195068359375000e+03 1.804097294807434082e+00 3.000000000000000000e+00 4.014730224609375000e+02 -9.125000000000000000e+01 5.025000000000000000e+01
6.800000000000000000e+01 8.326769230769234582e+02 3.773595275878906250e+02 -8.385314941406250000e-01 0.000000000000000000e+00 0.000000000000000000e+00 2.308394287109375000e+03 1.964043498039245605e+00 4.000000000000000000e+00 4.446458435058593750e+02 -9.075000000000000000e+01 5.025000000000000000e+01
6.300000000000000000e+01 8.125999999999999091e+02 3.257697753906250000e+02 -7.849121093750000000e-01 0.000000000000000000e+00 2.352941185235977173e-01 2.273667236328125000e+03 1.985110521316528320e+00 4.000000000000000000e+00 4.269435424804687500e+02 -8.975000000000000000e+01 5.025000000000000000e+01
5.800000000000000000e+01 7.443615384615386574e+02 3.862264709472656250e+02 -9.557189941406250000e-01 9.999999776482582092e-03 0.000000000000000000e+00 2.181265380859375000e+03 1.135110855102539062e+00 4.000000000000000000e+00 3.257294311523437500e+02 -8.725000000000000000e+01 5.025000000000000000e+01
5.200000000000000000e+01 7.380692307692311260e+02 3.948738403320312500e+02 -1.038055419921875000e+00 9.999999776482582092e-03 0.000000000000000000e+00 2.191703613281250000e+03 1.962842345237731934e+00 4.000000000000000000e+00 3.208587646484375000e+02 -8.675000000000000000e+01 5.025000000000000000e+01
4.500000000000000000e+01 7.242769230769233673e+02 3.976549987792968750e+02 -1.120422363281250000e+00 9.999999776482582092e-03 0.000000000000000000e+00 2.202142089843750000e+03 1.620854377746582031e+00 4.000000000000000000e+00 2.951089477539062500e+02 -8.625000000000000000e+01 5.025000000000000000e+01
6.800000000000000000e+01 7.219846153846149264e+02 3.990342102050781250e+02 -1.235992431640625000e+00 0.000000000000000000e+00 0.000000000000000000e+00 2.197200195312500000e+03 8.131636381149291992e-01 4.000000000000000000e+00 2.240104522705078125e+02 -8.575000000000000000e+01 5.025000000000000000e+01
6.700000000000000000e+01 7.077153846153844370e+02 4.012797546386718750e+02 -1.351593017578125000e+00 0.000000000000000000e+00 0.000000000000000000e+00 2.192258544921875000e+03 1.466704726219177246e+00 4.000000000000000000e+00 1.768047943115234375e+02 -8.525000000000000000e+01 5.025000000000000000e+01
6.700000000000000000e+01 6.974384615384616382e+02 4.036521606445312500e+02 -1.467193603515625000e+00 0.000000000000000000e+00 0.000000000000000000e+00 2.187316894531250000e+03 1.718964338302612305e+00 4.000000000000000000e+00 1.425098724365234375e+02 -8.475000000000000000e+01 5.025000000000000000e+01
1.500000000000000000e+01 7.010692307692310123e+02 4.087977600097656250e+02 -1.556182861328125000e+00 0.000000000000000000e+00 0.000000000000000000e+00 2.184046630859375000e+03 1.670536398887634277e+00 3.000000000000000000e+00 1.053403091430664062e+02 -8.425000000000000000e+01 5.025000000000000000e+01
6.900000000000000000e+01 7.279230769230773603e+02 4.142916564941406250e+02 -1.565246582031250000e+00 0.000000000000000000e+00 0.000000000000000000e+00 2.185790771484375000e+03 1.836229920387268066e+00 4.000000000000000000e+00 1.735150604248046875e+02 -8.375000000000000000e+01 5.025000000000000000e+01
5.800000000000000000e+01 7.406384615384615699e+02 4.205897521972656250e+02 -1.574340820312500000e+00 0.000000000000000000e+00 0.000000000000000000e+00 2.187535156250000000e+03 2.013351678848266602e+00 4.000000000000000000e+00 1.664856567382812500e+02 -8.325000000000000000e+01 5.025000000000000000e+01
6.000000000000000000e+00 7.434999999999998863e+02 4.238979187011718750e+02 -1.581359863281250000e+00 0.000000000000000000e+00 0.000000000000000000e+00 2.189467041015625000e+03 2.036356687545776367e+00 1.000000000000000000e+00 1.001376342773437500e+02 -8.225000000000000000e+01 5.025000000000000000e+01
4.000000000000000000e+01 7.427307692307692832e+02 4.187189636230468750e+02 -1.568054199218750000e+00 0.000000000000000000e+00 0.000000000000000000e+00 2.188098388671875000e+03 2.018383979797363281e+00 3.000000000000000000e+00 1.031742706298828125e+02 -8.175000000000000000e+01 5.025000000000000000e+01
3.300000000000000000e+01 7.439461538461538339e+02 4.067474975585937500e+02 -1.554779052734375000e+00 9.999999776482582092e-03 0.000000000000000000e+00 2.186729736328125000e+03 1.994121909141540527e+00 3.000000000000000000e+00 1.849921569824218750e+02 -8.125000000000000000e+01 5.025000000000000000e+01
5.700000000000000000e+01 7.369846153846153811e+02 3.945684204101562500e+02 -1.541503906250000000e+00 9.999999776482582092e-03 0.000000000000000000e+00 2.185360839843750000e+03 1.974457144737243652e+00 4.000000000000000000e+00 2.395321960449218750e+02 -8.075000000000000000e+01 5.025000000000000000e+01
4.800000000000000000e+01 7.524307692307691013e+02 3.956373596191406250e+02 -1.609069824218750000e+00 9.999999776482582092e-03 0.000000000000000000e+00 2.157020996093750000e+03 1.938115000724792480e+00 4.000000000000000000e+00 2.690936279296875000e+02 -7.975000000000000000e+01 5.025000000000000000e+01
2.500000000000000000e+01 7.565307692307693515e+02 4.149326477050781250e+02 -1.649566650390625000e+00 9.999999776482582092e-03 5.882352963089942932e-02 2.141022216796875000e+03 7.859046459197998047e-01 3.000000000000000000e+00 2.536848297119140625e+02 -7.925000000000000000e+01 5.025000000000000000e+01
5.800000000000000000e+01 7.699230769230767919e+02 4.263926086425781250e+02 -1.690063476562500000e+00 9.999999776482582092e-03 6.470588445663452148e-01 2.125023681640625000e+03 1.186261773109436035e+00 4.000000000000000000e+00 2.777930603027343750e+02 -7.875000000000000000e+01 5.025000000000000000e+01
4.200000000000000000e+01 7.836615384615383846e+02 4.328243103027343750e+02 -1.811859130859375000e+00 9.999999776482582092e-03 0.000000000000000000e+00 2.092278076171875000e+03 1.003309369087219238e+00 3.000000000000000000e+00 2.619602050781250000e+02 -7.825000000000000000e+01 5.025000000000000000e+01
2.800000000000000000e+01 7.961461538461537657e+02 4.358418273925781250e+02 -1.933685302734375000e+00 9.999999776482582092e-03 0.000000000000000000e+00 2.059532470703125000e+03 1.536647200584411621e+00 3.000000000000000000e+00 2.560854492187500000e+02 -7.775000000000000000e+01 5.025000000000000000e+01
4.100000000000000000e+01 8.124769230769229580e+02 4.377636108398437500e+02 -2.055480957031250000e+00 9.999999776482582092e-03 0.000000000000000000e+00 2.026786865234375000e+03 1.909842729568481445e+00 3.000000000000000000e+00 2.616852416992187500e+02 -7.725000000000000000e+01 5.025000000000000000e+01
5.200000000000000000e+01 8.184384615384612971e+02 4.591891784667968750e+02 -2.313140869140625000e+00 9.999999776482582092e-03 1.000000000000000000e+00 1.961993774414062500e+03 1.926665902137756348e+00 4.000000000000000000e+00 3.295102233886718750e+02 -7.625000000000000000e+01 5.025000000000000000e+01
2.300000000000000000e+01 8.455923076923082817e+02 4.833535766601562500e+02 -2.446166992187500000e+00 9.999999776482582092e-03 5.882353186607360840e-01 1.929806640625000000e+03 1.926473975181579590e+00 3.000000000000000000e+00 3.473002319335937500e+02 -7.575000000000000000e+01 5.025000000000000000e+01
6.600000000000000000e+01 8.784538461538465981e+02 5.025746459960937500e+02 -2.685424804687500000e+00 9.999999776482582092e-03 2.941176593303680420e-01 1.869093627929687500e+03 1.393818616867065430e+00 4.000000000000000000e+00 3.796215209960937500e+02 -7.475000000000000000e+01 5.025000000000000000e+01
2.400000000000000000e+01 8.836923076923077360e+02 5.016830749511718750e+02 -2.764801025390625000e+00 9.999999776482582092e-03 0.000000000000000000e+00 1.844229003906250000e+03 1.103775382041931152e+00 3.000000000000000000e+00 4.023025512695312500e+02 -7.425000000000000000e+01 5.025000000000000000e+01
5.300000000000000000e+01 8.959307692307691013e+02 4.898930358886718750e+02 -2.844207763671875000e+00 1.030258163809776306e-01 2.941176593303680420e-01 1.819364379882812500e+03 1.811505556106567383e+00 4.000000000000000000e+00 4.420063781738281250e+02 -7.375000000000000000e+01 5.025000000000000000e+01
5.400000000000000000e+01 9.149384615384623203e+02 4.709154052734375000e+02 -2.923614501953125000e+00 9.999999776482582092e-03 0.000000000000000000e+00 1.794499877929687500e+03 1.861022830009460449e+00 4.000000000000000000e+00 4.498727722167968750e+02 -7.325000000000000000e+01 5.025000000000000000e+01
5.500000000000000000e+01 9.303538461538466890e+02 4.592142028808593750e+02 -2.922882080078125000e+00 1.045278161764144897e-01 6.470588445663452148e-01 1.780241699218750000e+03 1.588185787200927734e+00 4.000000000000000000e+00 4.514704284667968750e+02 -7.275000000000000000e+01 5.025000000000000000e+01
6.900000000000000000e+01 1.003523076923077269e+03 4.516660461425781250e+02 -2.868072509765625000e+00 1.776345223188400269e-01 6.470588445663452148e-01 1.758796264648437500e+03 1.806645035743713379e+00 4.000000000000000000e+00 6.245886840820312500e+02 -7.175000000000000000e+01 5.025000000000000000e+01
4.300000000000000000e+01 9.947769230769229125e+02 4.536697387695312500e+02 -2.775817871093750000e+00 1.329844295978546143e-01 2.941176593303680420e-01 1.749415161132812500e+03 1.826298594474792480e+00 3.000000000000000000e+00 5.385020141601562500e+02 -7.075000000000000000e+01 5.025000000000000000e+01
6.000000000000000000e+01 1.028446153846153720e+03 4.546351318359375000e+02 -2.710998535156250000e+00 1.335572302341461182e-01 2.941176593303680420e-01 1.750756713867187500e+03 1.826424717903137207e+00 4.000000000000000000e+00 6.035090942382812500e+02 -7.025000000000000000e+01 5.025000000000000000e+01
5.400000000000000000e+01 1.034361538461538430e+03 4.596755371093750000e+02 -2.646148681640625000e+00 9.999999776482582092e-03 0.000000000000000000e+00 1.752098266601562500e+03 1.842605710029602051e+00 4.000000000000000000e+00 5.490084228515625000e+02 -6.975000000000000000e+01 5.025000000000000000e+01
6.400000000000000000e+01 1.107461538461538112e+03 4.941447448730468750e+02 -2.443847656250000000e+00 1.102127730846405029e-01 0.000000000000000000e+00 1.771460571289062500e+03 1.871564984321594238e+00 4.000000000000000000e+00 5.236289062500000000e+02 -6.875000000000000000e+01 5.025000000000000000e+01
2.800000000000000000e+01 1.146507692307692651e+03 5.132465209960937500e+02 -2.320892333984375000e+00 9.999999776482582092e-03 2.941176593303680420e-01 1.786145385742187500e+03 1.840444922447204590e+00 3.000000000000000000e+00 4.812283325195312500e+02 -6.825000000000000000e+01 5.025000000000000000e+01
5.700000000000000000e+01 1.199653846153845507e+03 5.271332397460937500e+02 -2.197967529296875000e+00 9.999999776482582092e-03 0.000000000000000000e+00 1.800830200195312500e+03 1.828104972839355469e+00 4.000000000000000000e+00 5.812657470703125000e+02 -6.775000000000000000e+01 5.025000000000000000e+01
7.000000000000000000e+01 1.222584615384615972e+03 5.355349731445312500e+02 -2.011657714843750000e+00 9.999999776482582092e-03 0.000000000000000000e+00 1.819136962890625000e+03 9.242001771926879883e-01 4.000000000000000000e+00 4.546514892578125000e+02 -6.725000000000000000e+01 5.025000000000000000e+01
5.800000000000000000e+01 1.081500000000000227e+03 5.119077453613281250e+02 1.555145263671875000e+00 0.000000000000000000e+00 0.000000000000000000e+00 1.632227050781250000e+03 1.274054050445556641e+00 4.000000000000000000e+00 2.671199645996093750e+02 -5.725000000000000000e+01 5.025000000000000000e+01
5.500000000000000000e+01 1.094469230769230990e+03 5.139711914062500000e+02 1.576416015625000000e+00 0.000000000000000000e+00 0.000000000000000000e+00 1.613300170898437500e+03 1.524408698081970215e+00 4.000000000000000000e+00 3.764827270507812500e+02 -5.675000000000000000e+01 5.025000000000000000e+01
4.800000000000000000e+01 1.905692307692308532e+03 4.509435729980468750e+02 3.374053955078125000e+00 0.000000000000000000e+00 2.352941185235977173e-01 1.935531005859375000e+03 2.041269302368164062e+00 4.000000000000000000e+00 7.003946533203125000e+02 -1.257500000000000000e+02 5.075000000000000000e+01
1.900000000000000000e+01 1.594369230769231763e+03 4.579452209472656250e+02 2.234832763671875000e+00 0.000000000000000000e+00 0.000000000000000000e+00 1.691559692382812500e+03 1.827320694923400879e+00 3.000000000000000000e+00 1.186470336914062500e+03 -1.252500000000000000e+02 5.075000000000000000e+01
0.000000000000000000e+00 1.288292307692307531e+03 4.806287536621093750e+02 9.948730468750000000e-01 9.999999776482582092e-03 0.000000000000000000e+00 1.423885253906250000e+03 1.839478492736816406e+00 1.000000000000000000e+00 1.585523681640625000e+03 -1.247500000000000000e+02 5.075000000000000000e+01
6.000000000000000000e+00 1.111653846153846416e+03 5.941304321289062500e+02 -1.468261718750000000e+00 0.000000000000000000e+00 0.000000000000000000e+00 1.019029113769531250e+03 1.257511377334594727e+00 1.000000000000000000e+00 1.947363281250000000e+03 -1.232500000000000000e+02 5.075000000000000000e+01
2.000000000000000000e+00 8.248076923076920366e+02 5.257600708007812500e+02 -1.451507568359375000e+00 0.000000000000000000e+00 5.882353186607360840e-01 1.149521728515625000e+03 1.668467640876770020e+00 1.000000000000000000e+00 1.812723876953125000e+03 -1.227500000000000000e+02 5.075000000000000000e+01
3.400000000000000000e+01 7.858461538461538112e+02 4.073132019042968750e+02 -1.434783935546875000e+00 0.000000000000000000e+00 6.470588445663452148e-01 1.280014404296875000e+03 1.721846342086791992e+00 3.000000000000000000e+00 9.251932983398437500e+02 -1.222500000000000000e+02 5.075000000000000000e+01
5.900000000000000000e+01 5.065076923076925937e+02 2.774731750488281250e+02 -1.498809814453125000e+00 1.406033337116241455e-01 2.352941185235977173e-01 1.372935668945312500e+03 1.856443405151367188e+00 4.000000000000000000e+00 1.782346801757812500e+03 -1.217500000000000000e+02 5.075000000000000000e+01
2.000000000000000000e+00 3.453692307692305121e+02 2.442580871582031250e+02 -1.805236816406250000e+00 0.000000000000000000e+00 5.882352963089942932e-02 1.353142578125000000e+03 2.000236511230468750e+00 1.000000000000000000e+00 4.567500915527343750e+02 -1.212500000000000000e+02 5.075000000000000000e+01
3.800000000000000000e+01 4.010846153846154039e+02 1.490482635498046875e+02 -2.418060302734375000e+00 0.000000000000000000e+00 2.352941185235977173e-01 1.313556640625000000e+03 2.082827806472778320e+00 3.000000000000000000e+00 7.994185180664062500e+02 -1.202500000000000000e+02 5.075000000000000000e+01
2.300000000000000000e+01 5.994384615384615245e+02 1.957810363769531250e+02 -2.695922851562500000e+00 0.000000000000000000e+00 7.058823704719543457e-01 1.297072875976562500e+03 2.057859659194946289e+00 3.000000000000000000e+00 5.162697753906250000e+02 -1.197500000000000000e+02 5.075000000000000000e+01
6.000000000000000000e+01 1.000984615384615381e+03 4.138882446289062500e+02 -3.194488525390625000e+00 0.000000000000000000e+00 2.352941185235977173e-01 1.270723754882812500e+03 2.002580642700195312e+00 4.000000000000000000e+00 1.184969482421875000e+03 -1.187500000000000000e+02 5.075000000000000000e+01
5.700000000000000000e+01 1.353630769230769602e+03 5.768646240234375000e+02 -3.493255615234375000e+00 0.000000000000000000e+00 0.000000000000000000e+00 1.246700805664062500e+03 1.769025087356567383e+00 4.000000000000000000e+00 7.742891845703125000e+02 -1.177500000000000000e+02 5.075000000000000000e+01
3.300000000000000000e+01 1.348661538461538157e+03 5.826194458007812500e+02 -3.476165771484375000e+00 2.286592274904251099e-01 0.000000000000000000e+00 1.236627929687500000e+03 1.554982423782348633e+00 3.000000000000000000e+00 1.534231323242187500e+03 -1.172500000000000000e+02 5.075000000000000000e+01
6.700000000000000000e+01 6.419538461538463707e+02 2.671477050781250000e+02 -1.672760009765625000e+00 1.069910526275634766e-01 0.000000000000000000e+00 1.656239746093750000e+03 1.497767448425292969e+00 4.000000000000000000e+00 1.791572998046875000e+03 -1.147500000000000000e+02 5.075000000000000000e+01
3.000000000000000000e+00 3.727923076923077588e+02 2.049811706542968750e+02 -5.255126953125000000e-01 0.000000000000000000e+00 0.000000000000000000e+00 1.939311523437500000e+03 1.959843993186950684e+00 1.000000000000000000e+00 1.080350830078125000e+03 -1.137500000000000000e+02 5.075000000000000000e+01
1.000000000000000000e+00 3.451153846153846416e+02 1.582876434326171875e+02 6.023864746093750000e-01 0.000000000000000000e+00 0.000000000000000000e+00 2.216323242187500000e+03 3.453091859817504883e+00 1.000000000000000000e+00 8.386262817382812500e+02 -1.127500000000000000e+02 5.075000000000000000e+01
4.000000000000000000e+00 3.216076923076923322e+02 1.324940795898437500e+02 1.082366943359375000e+00 0.000000000000000000e+00 0.000000000000000000e+00 2.343191894531250000e+03 3.491236925125122070e+00 1.000000000000000000e+00 7.662572021484375000e+02 -1.122500000000000000e+02 5.075000000000000000e+01
5.000000000000000000e+00 2.921999999999999886e+02 1.282422790527343750e+02 1.478424072265625000e+00 0.000000000000000000e+00 0.000000000000000000e+00 2.458423583984375000e+03 3.510749340057373047e+00 1.000000000000000000e+00 7.198114624023437500e+02 -1.117500000000000000e+02 5.075000000000000000e+01
2.000000000000000000e+00 2.614923076923076906e+02 1.196586990356445312e+02 1.874450683593750000e+00 0.000000000000000000e+00 2.941176593303680420e-01 2.573655029296875000e+03 3.534750461578369141e+00 1.000000000000000000e+00 7.658287353515625000e+02 -1.112500000000000000e+02 5.075000000000000000e+01
1.000000000000000000e+00 2.723000000000000682e+02 1.259344253540039062e+02 2.270477294921875000e+00 0.000000000000000000e+00 0.000000000000000000e+00 2.688886474609375000e+03 3.542708396911621094e+00 1.000000000000000000e+00 7.925377807617187500e+02 -1.107500000000000000e+02 5.075000000000000000e+01
0.000000000000000000e+00 2.811230769230768374e+02 1.417937927246093750e+02 2.410217285156250000e+00 0.000000000000000000e+00 0.000000000000000000e+00 2.750071289062500000e+03 3.563951969146728516e+00 1.000000000000000000e+00 7.244193115234375000e+02 -1.102500000000000000e+02 5.075000000000000000e+01
2.000000000000000000e+00 3.138461538461538680e+02 1.559351959228515625e+02 2.464477539062500000e+00 0.000000000000000000e+00 0.000000000000000000e+00 2.793240478515625000e+03 3.550670146942138672e+00 1.000000000000000000e+00 7.166848754882812500e+02 -1.097500000000000000e+02 5.075000000000000000e+01
0.000000000000000000e+00 3.226076923076924459e+02 1.644618988037109375e+02 2.518768310546875000e+00 0.000000000000000000e+00 0.000000000000000000e+00 2.836409667968750000e+03 3.542253732681274414e+00 1.000000000000000000e+00 7.112188110351562500e+02 -1.092500000000000000e+02 5.075000000000000000e+01
1.000000000000000000e+00 3.043076923076922640e+02 1.674902801513671875e+02 2.573028564453125000e+00 0.000000000000000000e+00 0.000000000000000000e+00 2.879579101562500000e+03 3.541121959686279297e+00 1.000000000000000000e+00 6.731296997070312500e+02 -1.087500000000000000e+02 5.075000000000000000e+01
6.000000000000000000e+00 3.099769230769231285e+02 1.906132812500000000e+02 2.079528808593750000e+00 0.000000000000000000e+00 0.000000000000000000e+00 2.837812255859375000e+03 3.531788349151611328e+00 1.000000000000000000e+00 7.222064819335937500e+02 -1.077500000000000000e+02 5.075000000000000000e+01
4.000000000000000000e+00 3.167538461538462116e+02 1.977027435302734375e+02 1.832794189453125000e+00 0.000000000000000000e+00 0.000000000000000000e+00 2.816928710937500000e+03 3.509482622146606445e+00 1.000000000000000000e+00 5.900749511718750000e+02 -1.072500000000000000e+02 5.075000000000000000e+01
1.000000000000000000e+00 3.303923076923076678e+02 2.045436096191406250e+02 1.568756103515625000e+00 0.000000000000000000e+00 0.000000000000000000e+00 2.790365966796875000e+03 3.504919290542602539e+00 1.000000000000000000e+00 6.258916625976562500e+02 -1.067500000000000000e+02 5.075000000000000000e+01
3.000000000000000000e+00 4.775384615384616041e+02 2.198020782470703125e+02 4.144287109375000000e-02 0.000000000000000000e+00 1.000000000000000000e+00 2.590543212890625000e+03 3.357424259185791016e+00 1.000000000000000000e+00 5.094258422851562500e+02 -1.017500000000000000e+02 5.075000000000000000e+01
6.200000000000000000e+01 5.573769230769229353e+02 2.713637390136718750e+02 3.733520507812500000e-01 0.000000000000000000e+00 2.352941185235977173e-01 2.641039306640625000e+03 9.145859479904174805e-01 4.000000000000000000e+00 6.901782226562500000e+02 -9.975000000000000000e+01 5.075000000000000000e+01
2.200000000000000000e+01 5.415307692307693515e+02 2.741268920898437500e+02 4.304504394531250000e-01 0.000000000000000000e+00 2.941176593303680420e-01 2.649975830078125000e+03 2.879628658294677734e+00 3.000000000000000000e+00 3.066116333007812500e+02 -9.925000000000000000e+01 5.075000000000000000e+01
2.300000000000000000e+01 5.350076923076923094e+02 2.690776672363281250e+02 2.544860839843750000e-01 0.000000000000000000e+00 2.352941185235977173e-01 2.630026123046875000e+03 3.420057535171508789e+00 3.000000000000000000e+00 2.742057800292968750e+02 -9.775000000000000000e+01 5.075000000000000000e+01
5.300000000000000000e+01 5.950923076923077133e+02 2.830734252929687500e+02 -3.453063964843750000e-01 0.000000000000000000e+00 0.000000000000000000e+00 2.513784667968750000e+03 9.010481834411621094e-01 4.000000000000000000e+00 2.980043334960937500e+02 -9.575000000000000000e+01 5.075000000000000000e+01
4.800000000000000000e+01 6.860692307692307850e+02 2.876994323730468750e+02 -8.962402343750000000e-01 0.000000000000000000e+00 0.000000000000000000e+00 2.401716064453125000e+03 1.226295709609985352e+00 4.000000000000000000e+00 3.873338012695312500e+02 -9.425000000000000000e+01 5.075000000000000000e+01
5.400000000000000000e+01 7.320538461538465071e+02 2.810459594726562500e+02 -1.081756591796875000e+00 0.000000000000000000e+00 0.000000000000000000e+00 2.363896728515625000e+03 1.336266398429870605e+00 4.000000000000000000e+00 3.902479248046875000e+02 -9.375000000000000000e+01 5.075000000000000000e+01
6.400000000000000000e+01 7.743923076923080089e+02 2.901501770019531250e+02 -1.154754638671875000e+00 0.000000000000000000e+00 0.000000000000000000e+00 2.337639160156250000e+03 1.261746644973754883e+00 4.000000000000000000e+00 3.757003173828125000e+02 -9.325000000000000000e+01 5.075000000000000000e+01
6.300000000000000000e+01 7.913615384615385437e+02 3.216437377929687500e+02 -1.227752685546875000e+00 0.000000000000000000e+00 0.000000000000000000e+00 2.311381835937500000e+03 1.342352271080017090e+00 4.000000000000000000e+00 4.201398315429687500e+02 -9.275000000000000000e+01 5.075000000000000000e+01
5.800000000000000000e+01 8.071999999999997044e+02 3.560328063964843750e+02 -1.300720214843750000e+00 0.000000000000000000e+00 0.000000000000000000e+00 2.285124511718750000e+03 8.588914871215820312e-01 4.000000000000000000e+00 4.399709472656250000e+02 -9.225000000000000000e+01 5.075000000000000000e+01
6.000000000000000000e+01 8.297307692307695106e+02 3.726782836914062500e+02 -1.355712890625000000e+00 0.000000000000000000e+00 5.882352963089942932e-02 2.261667968750000000e+03 1.475813269615173340e+00 4.000000000000000000e+00 3.974946899414062500e+02 -9.175000000000000000e+01 5.075000000000000000e+01
6.100000000000000000e+01 8.171384615384612289e+02 2.987705078125000000e+02 -1.374359130859375000e+00 9.999999776482582092e-03 5.294117927551269531e-01 2.202395751953125000e+03 1.965211153030395508e+00 4.000000000000000000e+00 3.753635864257812500e+02 -8.975000000000000000e+01 5.075000000000000000e+01
3.300000000000000000e+01 7.912307692307693969e+02 2.930891723632812500e+02 -1.404876708984375000e+00 9.999999776482582092e-03 5.294117927551269531e-01 2.189227050781250000e+03 7.943789362907409668e-01 3.000000000000000000e+00 3.765173950195312500e+02 -8.925000000000000000e+01 5.075000000000000000e+01
5.300000000000000000e+01 7.520000000000000000e+02 3.232758178710937500e+02 -1.465911865234375000e+00 9.999999776482582092e-03 0.000000000000000000e+00 2.162890136718750000e+03 7.913038730621337891e-01 4.000000000000000000e+00 3.374079895019531250e+02 -8.825000000000000000e+01 5.075000000000000000e+01
4.600000000000000000e+01 7.365076923076924231e+02 3.452514648437500000e+02 -1.543914794921875000e+00 9.999999776482582092e-03 2.352941185235977173e-01 2.151469726562500000e+03 7.919994592666625977e-01 4.000000000000000000e+00 3.156413879394531250e+02 -8.775000000000000000e+01 5.075000000000000000e+01
5.000000000000000000e+01 7.288692307692302847e+02 3.642797851562500000e+02 -1.637786865234375000e+00 9.999999776482582092e-03 0.000000000000000000e+00 2.140631835937500000e+03 7.929403185844421387e-01 4.000000000000000000e+00 2.930101318359375000e+02 -8.725000000000000000e+01 5.075000000000000000e+01
3.800000000000000000e+01 7.236769230769233445e+02 3.779062805175781250e+02 -1.731658935546875000e+00 9.999999776482582092e-03 0.000000000000000000e+00 2.129793945312500000e+03 7.971828579902648926e-01 3.000000000000000000e+00 2.756517639160156250e+02 -8.675000000000000000e+01 5.075000000000000000e+01
7.300000000000000000e+01 7.072769230769229125e+02 3.860007019042968750e+02 -1.825531005859375000e+00 9.999999776482582092e-03 0.000000000000000000e+00 2.118956298828125000e+03 7.991359233856201172e-01 4.000000000000000000e+00 2.437301483154296875e+02 -8.625000000000000000e+01 5.075000000000000000e+01
5.500000000000000000e+01 6.961307692307689194e+02 3.913004150390625000e+02 -1.892486572265625000e+00 9.999999776482582092e-03 1.176470592617988586e-01 2.117810791015625000e+03 1.568650126457214355e+00 4.000000000000000000e+00 1.853336334228515625e+02 -8.575000000000000000e+01 5.075000000000000000e+01
5.800000000000000000e+01 6.843615384615385437e+02 3.964750671386718750e+02 -1.959442138671875000e+00 0.000000000000000000e+00 0.000000000000000000e+00 2.116665283203125000e+03 1.855738878250122070e+00 4.000000000000000000e+00 1.551781311035156250e+02 -8.525000000000000000e+01 5.075000000000000000e+01
6.100000000000000000e+01 6.831307692307692605e+02 4.020956420898437500e+02 -2.026367187500000000e+00 0.000000000000000000e+00 0.000000000000000000e+00 2.115519775390625000e+03 1.553058862686157227e+00 4.000000000000000000e+00 1.339120788574218750e+02 -8.475000000000000000e+01 5.075000000000000000e+01
2.300000000000000000e+01 6.748384615384615017e+02 4.083944702148437500e+02 -2.062835693359375000e+00 0.000000000000000000e+00 0.000000000000000000e+00 2.116220947265625000e+03 1.998725771903991699e+00 3.000000000000000000e+00 1.064923095703125000e+02 -8.425000000000000000e+01 5.075000000000000000e+01
6.000000000000000000e+01 6.858384615384612744e+02 4.111935119628906250e+02 -2.007812500000000000e+00 0.000000000000000000e+00 0.000000000000000000e+00 2.122462890625000000e+03 1.980317711830139160e+00 4.000000000000000000e+00 1.116545715332031250e+02 -8.375000000000000000e+01 5.075000000000000000e+01
1.100000000000000000e+01 6.940692307692307850e+02 4.101796875000000000e+02 -1.952789306640625000e+00 9.999999776482582092e-03 0.000000000000000000e+00 2.128704833984375000e+03 1.979990601539611816e+00 3.000000000000000000e+00 1.626307373046875000e+02 -8.325000000000000000e+01 5.075000000000000000e+01
3.300000000000000000e+01 6.904230769230769056e+02 4.035644226074218750e+02 -1.897796630859375000e+00 9.999999776482582092e-03 5.882352963089942932e-02 2.134947021484375000e+03 1.995359778404235840e+00 3.000000000000000000e+00 1.600920257568359375e+02 -8.275000000000000000e+01 5.075000000000000000e+01
4.700000000000000000e+01 6.967846153846154493e+02 3.922189025878906250e+02 -1.889465332031250000e+00 9.999999776482582092e-03 0.000000000000000000e+00 2.121251464843750000e+03 1.990760087966918945e+00 4.000000000000000000e+00 9.315466308593750000e+01 -8.225000000000000000e+01 5.075000000000000000e+01
1.400000000000000000e+01 7.058615384615386574e+02 3.784579772949218750e+02 -1.927886962890625000e+00 9.999999776482582092e-03 0.000000000000000000e+00 2.087618652343750000e+03 1.967535734176635742e+00 3.000000000000000000e+00 6.344881820678710938e+01 -8.175000000000000000e+01 5.075000000000000000e+01
1.600000000000000000e+01 7.023615384615385437e+02 3.517676391601562500e+02 -2.004669189453125000e+00 9.999999776482582092e-03 5.882352963089942932e-02 2.020353149414062500e+03 1.926719188690185547e+00 3.000000000000000000e+00 6.465886688232421875e+01 -8.075000000000000000e+01 5.075000000000000000e+01
5.600000000000000000e+01 7.007461538461537884e+02 3.464907531738281250e+02 -1.988128662109375000e+00 9.999999776482582092e-03 0.000000000000000000e+00 2.025454711914062500e+03 1.918255090713500977e+00 4.000000000000000000e+00 1.213530960083007812e+02 -8.025000000000000000e+01 5.075000000000000000e+01
9.000000000000000000e+00 7.054846153846151537e+02 3.534559936523437500e+02 -1.953247070312500000e+00 9.999999776482582092e-03 5.882352963089942932e-02 2.043467651367187500e+03 1.915175437927246094e+00 1.000000000000000000e+00 5.528144073486328125e+01 -7.975000000000000000e+01 5.075000000000000000e+01
4.900000000000000000e+01 7.123461538461540385e+02 3.724966735839843750e+02 -1.918395996093750000e+00 9.999999776482582092e-03 0.000000000000000000e+00 2.061480712890625000e+03 1.659151673316955566e+00 4.000000000000000000e+00 7.659990692138671875e+01 -7.925000000000000000e+01 5.075000000000000000e+01
4.900000000000000000e+01 7.194923076923075769e+02 3.964537353515625000e+02 -1.883514404296875000e+00 9.999999776482582092e-03 0.000000000000000000e+00 2.079493652343750000e+03 7.818427085876464844e-01 4.000000000000000000e+00 1.512087402343750000e+02 -7.875000000000000000e+01 5.075000000000000000e+01
4.600000000000000000e+01 7.366615384615386120e+02 4.161082458496093750e+02 -2.049438476562500000e+00 9.999999776482582092e-03 0.000000000000000000e+00 2.042656982421875000e+03 7.798042297363281250e-01 4.000000000000000000e+00 2.064480590820312500e+02 -7.825000000000000000e+01 5.075000000000000000e+01
4.900000000000000000e+01 7.589846153846153811e+02 4.298748474121093750e+02 -2.215362548828125000e+00 9.999999776482582092e-03 0.000000000000000000e+00 2.005820312500000000e+03 7.725032567977905273e-01 4.000000000000000000e+00 2.432402648925781250e+02 -7.775000000000000000e+01 5.075000000000000000e+01
6.100000000000000000e+01 8.019230769230770193e+02 4.443924255371093750e+02 -2.548004150390625000e+00 9.999999776482582092e-03 0.000000000000000000e+00 1.932687255859375000e+03 1.876116156578063965e+00 4.000000000000000000e+00 2.697831726074218750e+02 -7.675000000000000000e+01 5.075000000000000000e+01
6.000000000000000000e+01 8.076076923076924459e+02 4.591826171875000000e+02 -2.717193603515625000e+00 9.999999776482582092e-03 5.882352963089942932e-02 1.898012451171875000e+03 1.696277737617492676e+00 4.000000000000000000e+00 2.782084350585937500e+02 -7.625000000000000000e+01 5.075000000000000000e+01
2.500000000000000000e+01 8.333153846153848008e+02 4.813179321289062500e+02 -2.886352539062500000e+00 9.999999776482582092e-03 6.470588445663452148e-01 1.863337646484375000e+03 7.654276490211486816e-01 3.000000000000000000e+00 3.105252075195312500e+02 -7.575000000000000000e+01 5.075000000000000000e+01
3.000000000000000000e+01 8.349846153846156085e+02 4.981842956542968750e+02 -3.055541992187500000e+00 9.999999776482582092e-03 9.411764740943908691e-01 1.828662841796875000e+03 8.167186379432678223e-01 3.000000000000000000e+00 3.307462158203125000e+02 -7.525000000000000000e+01 5.075000000000000000e+01
4.600000000000000000e+01 8.945769230769230944e+02 4.734252319335937500e+02 -3.445220947265625000e+00 1.513962000608444214e-01 0.000000000000000000e+00 1.720282714843750000e+03 1.270537257194519043e+00 4.000000000000000000e+00 4.876656494140625000e+02 -7.325000000000000000e+01 5.075000000000000000e+01
3.800000000000000000e+01 9.037307692307695106e+02 4.476931152343750000e+02 -3.437866210937500000e+00 1.554817110300064087e-01 0.000000000000000000e+00 1.704929321289062500e+03 7.915663719177246094e-01 3.000000000000000000e+00 5.281895751953125000e+02 -7.275000000000000000e+01 5.075000000000000000e+01
2.400000000000000000e+01 9.250538461538459387e+02 4.286358642578125000e+02 -3.399047851562500000e+00 1.782589107751846313e-01 2.941176593303680420e-01 1.693128906250000000e+03 7.309967875480651855e-01 3.000000000000000000e+00 5.387216186523437500e+02 -7.225000000000000000e+01 5.075000000000000000e+01
5.100000000000000000e+01 9.627307692307699654e+02 4.124972839355468750e+02 -3.360229492187500000e+00 1.814021319150924683e-01 6.470588445663452148e-01 1.681328613281250000e+03 7.218065857887268066e-01 4.000000000000000000e+00 5.363314208984375000e+02 -7.175000000000000000e+01 5.075000000000000000e+01
1.200000000000000000e+01 9.391923076923079634e+02 3.943440246582031250e+02 -3.321380615234375000e+00 1.242327764630317688e-01 5.882353186607360840e-01 1.669528198242187500e+03 1.028936386108398438e+00 3.000000000000000000e+00 4.574375305175781250e+02 -7.125000000000000000e+01 5.075000000000000000e+01
4.900000000000000000e+01 9.549769230769232990e+02 4.001877746582031250e+02 -3.257263183593750000e+00 1.329262256622314453e-01 6.470588445663452148e-01 1.668478515625000000e+03 9.205482006072998047e-01 4.000000000000000000e+00 5.048030090332031250e+02 -7.075000000000000000e+01 5.075000000000000000e+01
5.100000000000000000e+01 1.090830769230769192e+03 4.280179443359375000e+02 -3.128997802734375000e+00 2.656746506690979004e-01 0.000000000000000000e+00 1.666379028320312500e+03 1.746395945549011230e+00 4.000000000000000000e+00 7.426630249023437500e+02 -6.975000000000000000e+01 5.075000000000000000e+01
4.800000000000000000e+01 1.066784615384615336e+03 4.413555297851562500e+02 -3.058959960937500000e+00 9.999999776482582092e-03 0.000000000000000000e+00 1.667998168945312500e+03 1.783286452293395996e+00 4.000000000000000000e+00 3.935045471191406250e+02 -6.925000000000000000e+01 5.075000000000000000e+01
6.100000000000000000e+01 1.134484615384615836e+03 5.024552612304687500e+02 -2.883422851562500000e+00 2.559279799461364746e-01 0.000000000000000000e+00 1.687249145507812500e+03 1.806795001029968262e+00 4.000000000000000000e+00 6.021996459960937500e+02 -6.825000000000000000e+01 5.075000000000000000e+01
7.200000000000000000e+01 1.157392307692307668e+03 5.298809204101562500e+02 -2.795654296875000000e+00 9.999999776482582092e-03 0.000000000000000000e+00 1.696874633789062500e+03 1.783457636833190918e+00 4.000000000000000000e+00 4.108850708007812500e+02 -6.775000000000000000e+01 5.075000000000000000e+01
6.000000000000000000e+01 1.167846153846153811e+03 5.395912475585937500e+02 -2.659210205078125000e+00 1.064877659082412720e-01 0.000000000000000000e+00 1.709933715820312500e+03 7.146017551422119141e-01 4.000000000000000000e+00 4.974002685546875000e+02 -6.725000000000000000e+01 5.075000000000000000e+01
6.700000000000000000e+01 1.155615384615384983e+03 5.425155029296875000e+02 -2.474090576171875000e+00 9.999999776482582092e-03 5.882352963089942932e-02 1.726426269531250000e+03 7.055495977401733398e-01 4.000000000000000000e+00 4.692334594726562500e+02 -6.675000000000000000e+01 5.075000000000000000e+01
5.900000000000000000e+01 1.083492307692307577e+03 5.519086303710937500e+02 -2.103851318359375000e+00 2.166021019220352173e-01 8.823529481887817383e-01 1.759411621093750000e+03 1.614000916481018066e+00 4.000000000000000000e+00 6.121040039062500000e+02 -6.575000000000000000e+01 5.075000000000000000e+01
7.100000000000000000e+01 1.069492307692307577e+03 5.580230102539062500e+02 -1.895080566406250000e+00 9.999999776482582092e-03 0.000000000000000000e+00 1.772738403320312500e+03 1.174257516860961914e+00 4.000000000000000000e+00 2.961255798339843750e+02 -6.525000000000000000e+01 5.075000000000000000e+01
5.900000000000000000e+01 1.049630769230768465e+03 5.629119873046875000e+02 -1.678405761718750000e+00 9.999999776482582092e-03 0.000000000000000000e+00 1.785009887695312500e+03 1.254797458648681641e+00 4.000000000000000000e+00 5.104496459960937500e+02 -6.475000000000000000e+01 5.075000000000000000e+01
6.600000000000000000e+01 1.036515384615385074e+03 5.641030273437500000e+02 -1.461730957031250000e+00 9.999999776482582092e-03 2.352941185235977173e-01 1.797281372070312500e+03 7.183454036712646484e-01 4.000000000000000000e+00 3.090615844726562500e+02 -6.425000000000000000e+01 5.075000000000000000e+01
6.400000000000000000e+01 1.032099999999999454e+03 5.556826782226562500e+02 -1.245056152343750000e+00 9.999999776482582092e-03 0.000000000000000000e+00 1.809552978515625000e+03 1.174969792366027832e+00 4.000000000000000000e+00 3.820905151367187500e+02 -6.375000000000000000e+01 5.075000000000000000e+01
5.600000000000000000e+01 1.000153846153846189e+03 5.430169677734375000e+02 -1.042236328125000000e+00 9.999999776482582092e-03 2.941176593303680420e-01 1.815019287109375000e+03 1.626750707626342773e+00 4.000000000000000000e+00 3.131188659667968750e+02 -6.325000000000000000e+01 5.075000000000000000e+01
7.100000000000000000e+01 9.884000000000000909e+02 5.286614990234375000e+02 -6.365966796875000000e-01 9.999999776482582092e-03 2.941176593303680420e-01 1.825952148437500000e+03 1.727959990501403809e+00 4.000000000000000000e+00 2.802671203613281250e+02 -6.225000000000000000e+01 5.075000000000000000e+01
4.700000000000000000e+01 1.007969230769230990e+03 5.289846801757812500e+02 -4.030456542968750000e-01 0.000000000000000000e+00 0.000000000000000000e+00 1.819437377929687500e+03 1.733436822891235352e+00 4.000000000000000000e+00 2.058789367675781250e+02 -6.175000000000000000e+01 5.075000000000000000e+01
6.100000000000000000e+01 1.001300000000000409e+03 5.257714233398437500e+02 -7.727050781250000000e-02 0.000000000000000000e+00 1.176470592617988586e-01 1.776979248046875000e+03 1.731526017189025879e+00 4.000000000000000000e+00 2.019813385009765625e+02 -6.125000000000000000e+01 5.075000000000000000e+01
6.300000000000000000e+01 1.067753846153846553e+03 4.696515197753906250e+02 5.742797851562500000e-01 0.000000000000000000e+00 0.000000000000000000e+00 1.692062866210937500e+03 1.080564618110656738e+00 4.000000000000000000e+00 1.912445068359375000e+02 -6.025000000000000000e+01 5.075000000000000000e+01
1.200000000000000000e+01 1.154015384615384619e+03 5.485334472656250000e+02 1.072296142578125000e+00 0.000000000000000000e+00 0.000000000000000000e+00 1.536772705078125000e+03 8.030360937118530273e-01 3.000000000000000000e+00 4.502707824707031250e+02 -5.675000000000000000e+01 5.075000000000000000e+01
1.800000000000000000e+01 1.086192307692306940e+03 5.643272094726562500e+02 1.139495849609375000e+00 0.000000000000000000e+00 0.000000000000000000e+00 1.517276489257812500e+03 1.605527758598327637e+00 3.000000000000000000e+00 2.522004699707031250e+02 -5.625000000000000000e+01 5.075000000000000000e+01
5.400000000000000000e+01 2.232200000000001182e+03 5.372940063476562500e+02 4.575317382812500000e+00 0.000000000000000000e+00 0.000000000000000000e+00 2.115961669921875000e+03 2.232694864273071289e+00 4.000000000000000000e+00 8.418273162841796875e+01 -1.272500000000000000e+02 5.125000000000000000e+01
2.000000000000000000e+01 2.035807692307692832e+03 5.260311889648437500e+02 3.881134033203125000e+00 0.000000000000000000e+00 0.000000000000000000e+00 2.000029052734375000e+03 1.923736572265625000e+00 3.000000000000000000e+00 1.238278198242187500e+03 -1.267500000000000000e+02 5.125000000000000000e+01
5.700000000000000000e+01 1.803138461538460888e+03 4.817588806152343750e+02 3.186920166015625000e+00 0.000000000000000000e+00 0.000000000000000000e+00 1.884096313476562500e+03 1.811419486999511719e+00 4.000000000000000000e+00 8.344835205078125000e+02 -1.262500000000000000e+02 5.125000000000000000e+01
4.600000000000000000e+01 1.543084615384614608e+03 4.552609558105468750e+02 2.492736816406250000e+00 0.000000000000000000e+00 0.000000000000000000e+00 1.768163574218750000e+03 1.634583234786987305e+00 4.000000000000000000e+00 1.075796630859375000e+03 -1.257500000000000000e+02 5.125000000000000000e+01
1.000000000000000000e+00 1.339523076923076587e+03 4.163767395019531250e+02 1.571838378906250000e+00 0.000000000000000000e+00 0.000000000000000000e+00 1.594086791992187500e+03 1.351782917976379395e+00 1.000000000000000000e+00 1.513331665039062500e+03 -1.252500000000000000e+02 5.125000000000000000e+01
3.000000000000000000e+01 8.828384615384610470e+02 4.630402221679687500e+02 -1.417572021484375000e+00 0.000000000000000000e+00 0.000000000000000000e+00 1.013712036132812500e+03 1.378862619400024414e+00 3.000000000000000000e+00 1.728789306640625000e+03 -1.237500000000000000e+02 5.125000000000000000e+01
1.500000000000000000e+01 6.653769230769229353e+02 3.917894287109375000e+02 -1.572570800781250000e+00 9.999999776482582092e-03 5.882352963089942932e-02 1.179438476562500000e+03 1.610068917274475098e+00 3.000000000000000000e+00 1.566042114257812500e+03 -1.227500000000000000e+02 5.125000000000000000e+01
2.300000000000000000e+01 4.717923076923079293e+02 3.174960327148437500e+02 -1.650054931640625000e+00 0.000000000000000000e+00 0.000000000000000000e+00 1.262301635742187500e+03 1.827944636344909668e+00 3.000000000000000000e+00 1.163367431640625000e+03 -1.222500000000000000e+02 5.125000000000000000e+01
2.500000000000000000e+01 4.644307692307692719e+02 2.501055755615234375e+02 -1.798126220703125000e+00 0.000000000000000000e+00 0.000000000000000000e+00 1.312453613281250000e+03 1.911268591880798340e+00 3.000000000000000000e+00 1.213621582031250000e+03 -1.217500000000000000e+02 5.125000000000000000e+01
2.000000000000000000e+01 4.108384615384613880e+02 2.122359466552734375e+02 -2.157897949218750000e+00 0.000000000000000000e+00 0.000000000000000000e+00 1.264472045898437500e+03 1.991146683692932129e+00 3.000000000000000000e+00 1.050169921875000000e+03 -1.212500000000000000e+02 5.125000000000000000e+01
4.200000000000000000e+01 5.567230769230766327e+02 1.866910095214843750e+02 -2.517639160156250000e+00 0.000000000000000000e+00 0.000000000000000000e+00 1.216490600585937500e+03 1.994809746742248535e+00 3.000000000000000000e+00 1.281846557617187500e+03 -1.207500000000000000e+02 5.125000000000000000e+01
6.600000000000000000e+01 6.014538461538460297e+02 1.904819183349609375e+02 -2.877380371093750000e+00 0.000000000000000000e+00 2.352941185235977173e-01 1.168509033203125000e+03 1.977137804031372070e+00 4.000000000000000000e+00 1.013475097656250000e+03 -1.202500000000000000e+02 5.125000000000000000e+01
6.500000000000000000e+01 8.404769230769232990e+02 2.596905517578125000e+02 -3.147186279296875000e+00 9.999999776482582092e-03 4.705882370471954346e-01 1.142915771484375000e+03 1.886314034461975098e+00 4.000000000000000000e+00 1.268730224609375000e+03 -1.197500000000000000e+02 5.125000000000000000e+01
4.100000000000000000e+01 9.978538461538457796e+02 3.894050903320312500e+02 -3.327056884765625000e+00 0.000000000000000000e+00 8.235294222831726074e-01 1.139711059570312500e+03 1.876726984977722168e+00 3.000000000000000000e+00 1.388623413085937500e+03 -1.192500000000000000e+02 5.125000000000000000e+01
2.000000000000000000e+00 1.273753846153847007e+03 4.912336425781250000e+02 -3.506896972656250000e+00 0.000000000000000000e+00 2.352941185235977173e-01 1.136506225585937500e+03 1.772149801254272461e+00 1.000000000000000000e+00 1.850737426757812500e+03 -1.187500000000000000e+02 5.125000000000000000e+01
5.800000000000000000e+01 1.538015384615384846e+03 5.463234252929687500e+02 -3.686767578125000000e+00 0.000000000000000000e+00 3.529411852359771729e-01 1.133301513671875000e+03 1.087053418159484863e+00 4.000000000000000000e+00 9.912733154296875000e+02 -1.182500000000000000e+02 5.125000000000000000e+01
2.700000000000000000e+01 1.705415384615384710e+03 5.819368286132812500e+02 -3.623138427734375000e+00 3.739428818225860596e-01 0.000000000000000000e+00 1.157361083984375000e+03 1.049342751502990723e+00 3.000000000000000000e+00 1.922992797851562500e+03 -1.177500000000000000e+02 5.125000000000000000e+01
6.200000000000000000e+01 1.033661538461538612e+03 5.376561889648437500e+02 -3.333526611328125000e+00 0.000000000000000000e+00 0.000000000000000000e+00 1.223656738281250000e+03 1.445176601409912109e+00 4.000000000000000000e+00 1.745875610351562500e+03 -1.167500000000000000e+02 5.125000000000000000e+01
7.000000000000000000e+00 5.503846153846153584e+02 2.673769226074218750e+02 -1.616638183593750000e+00 0.000000000000000000e+00 0.000000000000000000e+00 1.657369506835937500e+03 7.190361022949218750e-01 1.000000000000000000e+00 1.301066162109375000e+03 -1.147500000000000000e+02 5.125000000000000000e+01
4.000000000000000000e+00 4.661769230769231172e+02 2.143645019531250000e+02 -1.090911865234375000e+00 0.000000000000000000e+00 0.000000000000000000e+00 1.790905395507812500e+03 8.055008053779602051e-01 1.000000000000000000e+00 1.190620239257812500e+03 -1.142500000000000000e+02 5.125000000000000000e+01
1.000000000000000000e+00 3.958461538461540385e+02 1.945319366455078125e+02 -5.601501464843750000e-01 0.000000000000000000e+00 0.000000000000000000e+00 1.924484130859375000e+03 1.859081745147705078e+00 1.000000000000000000e+00 9.847489013671875000e+02 -1.137500000000000000e+02 5.125000000000000000e+01
5.000000000000000000e+00 3.314384615384615245e+02 1.470409240722656250e+02 9.370117187500000000e-01 0.000000000000000000e+00 0.000000000000000000e+00 2.311316894531250000e+03 3.415352582931518555e+00 1.000000000000000000e+00 7.559796752929687500e+02 -1.122500000000000000e+02 5.125000000000000000e+01
5.000000000000000000e+00 3.036307692307693173e+02 1.326647186279296875e+02 1.277557373046875000e+00 0.000000000000000000e+00 0.000000000000000000e+00 2.417088867187500000e+03 3.397351741790771484e+00 1.000000000000000000e+00 7.641409301757812500e+02 -1.117500000000000000e+02 5.125000000000000000e+01
5.000000000000000000e+00 2.766384615384615699e+02 1.241729278564453125e+02 1.618103027343750000e+00 0.000000000000000000e+00 0.000000000000000000e+00 2.522860839843750000e+03 3.408376455307006836e+00 1.000000000000000000e+00 7.762044067382812500e+02 -1.112500000000000000e+02 5.125000000000000000e+01
5.000000000000000000e+00 2.875846153846154607e+02 1.256973648071289062e+02 1.958648681640625000e+00 0.000000000000000000e+00 0.000000000000000000e+00 2.628632812500000000e+03 3.431429862976074219e+00 1.000000000000000000e+00 7.695335083007812500e+02 -1.107500000000000000e+02 5.125000000000000000e+01
5.000000000000000000e+00 2.968846153846154721e+02 1.343416595458984375e+02 2.049468994140625000e+00 0.000000000000000000e+00 0.000000000000000000e+00 2.680662353515625000e+03 3.464574575424194336e+00 1.000000000000000000e+00 7.397543945312500000e+02 -1.102500000000000000e+02 5.125000000000000000e+01
0.000000000000000000e+00 3.058846153846154721e+02 1.474654998779296875e+02 2.057037353515625000e+00 0.000000000000000000e+00 0.000000000000000000e+00 2.714777832031250000e+03 3.476637601852416992e+00 1.000000000000000000e+00 6.877773437500000000e+02 -1.097500000000000000e+02 5.125000000000000000e+01
1.000000000000000000e+00 3.123384615384617291e+02 1.568625793457031250e+02 2.064605712890625000e+00 0.000000000000000000e+00 0.000000000000000000e+00 2.748893554687500000e+03 3.469867229461669922e+00 1.000000000000000000e+00 6.787004394531250000e+02 -1.092500000000000000e+02 5.125000000000000000e+01
0.000000000000000000e+00 3.096307692307690900e+02 1.719778594970703125e+02 1.814422607421875000e+00 0.000000000000000000e+00 2.941176593303680420e-01 2.760782470703125000e+03 3.485103607177734375e+00 1.000000000000000000e+00 6.359288330078125000e+02 -1.082500000000000000e+02 5.125000000000000000e+01
9.000000000000000000e+00 3.202076923076923549e+02 1.991815948486328125e+02 1.556671142578125000e+00 0.000000000000000000e+00 0.000000000000000000e+00 2.738555908203125000e+03 3.504797220230102539e+00 1.000000000000000000e+00 5.722769165039062500e+02 -1.077500000000000000e+02 5.125000000000000000e+01
7.000000000000000000e+00 5.523846153846159268e+02 1.787323913574218750e+02 -3.271484375000000000e-02 0.000000000000000000e+00 0.000000000000000000e+00 2.566132568359375000e+03 2.476564884185791016e+00 1.000000000000000000e+00 4.875391540527343750e+02 -1.007500000000000000e+02 5.125000000000000000e+01
2.800000000000000000e+01 5.294615384615386802e+02 1.882116088867187500e+02 1.886901855468750000e-01 0.000000000000000000e+00 6.470588445663452148e-01 2.598793945312500000e+03 3.415014266967773438e+00 3.000000000000000000e+00 2.606536865234375000e+02 -9.925000000000000000e+01 5.125000000000000000e+01
1.600000000000000000e+01 5.726692307692306940e+02 2.162970275878906250e+02 8.972167968750000000e-03 0.000000000000000000e+00 2.352941185235977173e-01 2.586052001953125000e+03 3.348744392395019531e+00 3.000000000000000000e+00 2.502437438964843750e+02 -9.775000000000000000e+01 5.125000000000000000e+01
2.800000000000000000e+01 6.260076923076923094e+02 2.184717712402343750e+02 -1.170043945312500000e-01 0.000000000000000000e+00 6.470588445663452148e-01 2.565697021484375000e+03 3.336313962936401367e+00 3.000000000000000000e+00 2.389074859619140625e+02 -9.725000000000000000e+01 5.125000000000000000e+01
4.300000000000000000e+01 6.351461538461537657e+02 2.475987091064453125e+02 -6.930847167968750000e-01 0.000000000000000000e+00 0.000000000000000000e+00 2.456310302734375000e+03 8.714583516120910645e-01 3.000000000000000000e+00 2.854094543457031250e+02 -9.575000000000000000e+01 5.125000000000000000e+01
5.600000000000000000e+01 6.547769230769227988e+02 2.539201507568359375e+02 -8.757019042968750000e-01 0.000000000000000000e+00 2.941176593303680420e-01 2.420117919921875000e+03 8.696691989898681641e-01 4.000000000000000000e+00 3.276743774414062500e+02 -9.525000000000000000e+01 5.125000000000000000e+01
4.900000000000000000e+01 6.706076923076923322e+02 2.477467651367187500e+02 -1.055206298828125000e+00 0.000000000000000000e+00 0.000000000000000000e+00 2.384015869140625000e+03 8.737932443618774414e-01 4.000000000000000000e+00 3.514350891113281250e+02 -9.475000000000000000e+01 5.125000000000000000e+01
6.700000000000000000e+01 6.913384615384618428e+02 2.408292083740234375e+02 -1.234680175781250000e+00 0.000000000000000000e+00 5.882352963089942932e-02 2.347913574218750000e+03 1.091278314590454102e+00 4.000000000000000000e+00 3.856307373046875000e+02 -9.425000000000000000e+01 5.125000000000000000e+01
4.600000000000000000e+01 7.152692307692307168e+02 2.355410461425781250e+02 -1.414184570312500000e+00 0.000000000000000000e+00 5.294117927551269531e-01 2.311811279296875000e+03 8.820083737373352051e-01 4.000000000000000000e+00 3.799738159179687500e+02 -9.375000000000000000e+01 5.125000000000000000e+01
7.000000000000000000e+01 7.790769230769229807e+02 2.651664123535156250e+02 -1.584594726562500000e+00 9.999999776482582092e-03 0.000000000000000000e+00 2.257689941406250000e+03 2.022817611694335938e+00 4.000000000000000000e+00 4.094635009765625000e+02 -9.275000000000000000e+01 5.125000000000000000e+01
5.200000000000000000e+01 8.228153846153846871e+02 3.139393615722656250e+02 -1.777130126953125000e+00 9.999999776482582092e-03 5.882353186607360840e-01 2.188763671875000000e+03 2.082397222518920898e+00 4.000000000000000000e+00 3.911296081542968750e+02 -9.125000000000000000e+01 5.125000000000000000e+01
6.500000000000000000e+01 8.333307692307694197e+02 2.849378967285156250e+02 -1.846557617187500000e+00 9.999999776482582092e-03 0.000000000000000000e+00 2.154251953125000000e+03 2.027669191360473633e+00 4.000000000000000000e+00 3.896529235839843750e+02 -9.025000000000000000e+01 5.125000000000000000e+01
3.900000000000000000e+01 8.316461538461537657e+02 2.800770874023437500e+02 -1.894348144531250000e+00 9.999999776482582092e-03 5.882353186607360840e-01 2.138008056640625000e+03 1.964935302734375000e+00 3.000000000000000000e+00 3.691405029296875000e+02 -8.975000000000000000e+01 5.125000000000000000e+01
6.100000000000000000e+01 8.017846153846153356e+02 2.814400329589843750e+02 -1.955261230468750000e+00 9.999999776482582092e-03 2.941176593303680420e-01 2.122776123046875000e+03 1.281076788902282715e+00 4.000000000000000000e+00 3.497615051269531250e+02 -8.925000000000000000e+01 5.125000000000000000e+01
5.700000000000000000e+01 7.713538461538457796e+02 2.853889465332031250e+02 -2.016143798828125000e+00 9.999999776482582092e-03 2.941176593303680420e-01 2.107544189453125000e+03 1.006112575531005859e+00 4.000000000000000000e+00 3.575291137695312500e+02 -8.875000000000000000e+01 5.125000000000000000e+01
5.800000000000000000e+01 7.245692307692308987e+02 3.036461791992187500e+02 -2.155578613281250000e+00 9.999999776482582092e-03 0.000000000000000000e+00 2.080400390625000000e+03 7.923359870910644531e-01 4.000000000000000000e+00 2.777590332031250000e+02 -8.775000000000000000e+01 5.125000000000000000e+01
5.600000000000000000e+01 7.073000000000004093e+02 3.295965576171875000e+02 -2.324523925781250000e+00 9.999999776482582092e-03 0.000000000000000000e+00 2.058789550781250000e+03 7.980268001556396484e-01 4.000000000000000000e+00 2.375170288085937500e+02 -8.675000000000000000e+01 5.125000000000000000e+01
6.100000000000000000e+01 6.884923076923076906e+02 3.407269287109375000e+02 -2.408996582031250000e+00 9.999999776482582092e-03 2.941176593303680420e-01 2.047984252929687500e+03 1.659580230712890625e+00 4.000000000000000000e+00 1.941662139892578125e+02 -8.625000000000000000e+01 5.125000000000000000e+01
3.600000000000000000e+01 6.763076923076924913e+02 3.523936767578125000e+02 -2.430664062500000000e+00 9.999999776482582092e-03 0.000000000000000000e+00 2.048576416015625000e+03 1.977526903152465820e+00 3.000000000000000000e+00 1.719999694824218750e+02 -8.575000000000000000e+01 5.125000000000000000e+01
5.900000000000000000e+01 6.729384615384616382e+02 3.698158569335937500e+02 -2.452301025390625000e+00 9.999999776482582092e-03 0.000000000000000000e+00 2.049168701171875000e+03 1.971969723701477051e+00 4.000000000000000000e+00 1.679907226562500000e+02 -8.525000000000000000e+01 5.125000000000000000e+01
6.000000000000000000e+00 6.695923076923074859e+02 3.849426269531250000e+02 -2.473968505859375000e+00 9.999999776482582092e-03 0.000000000000000000e+00 2.049760742187500000e+03 1.960880637168884277e+00 1.000000000000000000e+00 1.385775451660156250e+02 -8.475000000000000000e+01 5.125000000000000000e+01
7.000000000000000000e+00 6.581692307692306940e+02 3.965635375976562500e+02 -2.464294433593750000e+00 9.999999776482582092e-03 0.000000000000000000e+00 2.052369628906250000e+03 1.953123450279235840e+00 1.000000000000000000e+00 9.158667755126953125e+01 -8.425000000000000000e+01 5.125000000000000000e+01
2.000000000000000000e+01 6.539923076923075769e+02 3.975270690917968750e+02 -2.360717773437500000e+00 9.999999776482582092e-03 5.882353186607360840e-01 2.061028076171875000e+03 1.943559527397155762e+00 3.000000000000000000e+00 9.502926635742187500e+01 -8.375000000000000000e+01 5.125000000000000000e+01
5.200000000000000000e+01 6.581769230769230035e+02 3.894067382812500000e+02 -2.257110595703125000e+00 9.999999776482582092e-03 2.941176593303680420e-01 2.069686767578125000e+03 1.939094662666320801e+00 4.000000000000000000e+00 8.865423583984375000e+01 -8.325000000000000000e+01 5.125000000000000000e+01
1.900000000000000000e+01 6.566846153846151992e+02 3.758872375488281250e+02 -2.153503417968750000e+00 9.999999776482582092e-03 0.000000000000000000e+00 2.078345214843750000e+03 1.941144108772277832e+00 3.000000000000000000e+00 1.016746139526367188e+02 -8.275000000000000000e+01 5.125000000000000000e+01
1.500000000000000000e+01 6.533692307692307395e+02 3.626157836914062500e+02 -2.184265136718750000e+00 9.999999776482582092e-03 0.000000000000000000e+00 2.035725097656250000e+03 1.936546683311462402e+00 3.000000000000000000e+00 1.131838378906250000e+02 -8.225000000000000000e+01 5.125000000000000000e+01
3.200000000000000000e+01 6.584615384615384528e+02 3.438571472167968750e+02 -2.514556884765625000e+00 9.999999776482582092e-03 0.000000000000000000e+00 1.847926757812500000e+03 1.900652170181274414e+00 3.000000000000000000e+00 4.066680526733398438e+01 -8.125000000000000000e+01 5.125000000000000000e+01
6.200000000000000000e+01 6.566307692307692605e+02 3.388959045410156250e+02 -2.679718017578125000e+00 9.999999776482582092e-03 5.882352963089942932e-02 1.754027587890625000e+03 1.888148903846740723e+00 4.000000000000000000e+00 1.516192245483398438e+01 -8.075000000000000000e+01 5.125000000000000000e+01
1.200000000000000000e+01 6.830000000000000000e+02 3.519011535644531250e+02 -2.214935302734375000e+00 9.999999776482582092e-03 0.000000000000000000e+00 1.955298706054687500e+03 1.185332059860229492e+00 3.000000000000000000e+00 1.731661796569824219e+01 -7.925000000000000000e+01 5.125000000000000000e+01
3.500000000000000000e+01 6.931076923076921048e+02 3.683640747070312500e+02 -2.030914306640625000e+00 9.999999776482582092e-03 0.000000000000000000e+00 2.037024536132812500e+03 7.705648541450500488e-01 3.000000000000000000e+00 3.332099914550781250e+01 -7.875000000000000000e+01 5.125000000000000000e+01
4.900000000000000000e+01 7.248769230769229353e+02 3.877942199707031250e+02 -2.232513427734375000e+00 9.999999776482582092e-03 5.294117927551269531e-01 1.997180664062500000e+03 7.643096446990966797e-01 4.000000000000000000e+00 1.004303207397460938e+02 -7.825000000000000000e+01 5.125000000000000000e+01
2.000000000000000000e+01 7.513000000000002956e+02 4.091109313964843750e+02 -2.434112548828125000e+00 1.099888533353805542e-01 6.470588445663452148e-01 1.957336914062500000e+03 7.577934861183166504e-01 3.000000000000000000e+00 2.157283630371093750e+02 -7.775000000000000000e+01 5.125000000000000000e+01
2.100000000000000000e+01 7.662692307692310578e+02 4.265771484375000000e+02 -2.635711669921875000e+00 1.039507314562797546e-01 2.941176593303680420e-01 1.917493041992187500e+03 7.547930479049682617e-01 3.000000000000000000e+00 2.370303497314453125e+02 -7.725000000000000000e+01 5.125000000000000000e+01
4.100000000000000000e+01 7.816538461538461888e+02 4.406922912597656250e+02 -2.837158203125000000e+00 1.126414835453033447e-01 2.941176593303680420e-01 1.878429077148437500e+03 7.536458969116210938e-01 3.000000000000000000e+00 2.621594238281250000e+02 -7.675000000000000000e+01 5.125000000000000000e+01
5.500000000000000000e+01 8.121615384615383846e+02 4.785391845703125000e+02 -3.239166259765625000e+00 1.358046531677246094e-01 0.000000000000000000e+00 1.804980102539062500e+03 1.057611823081970215e+00 4.000000000000000000e+00 3.696444091796875000e+02 -7.575000000000000000e+01 5.125000000000000000e+01
5.500000000000000000e+01 8.265538461538460524e+02 4.966147766113281250e+02 -3.440185546875000000e+00 1.238401085138320923e-01 7.058823704719543457e-01 1.768255493164062500e+03 1.747719883918762207e+00 4.000000000000000000e+00 3.234350585937500000e+02 -7.525000000000000000e+01 5.125000000000000000e+01
3.900000000000000000e+01 8.395153846153843915e+02 5.024342041015625000e+02 -3.587951660156250000e+00 1.307751834392547607e-01 8.235294222831726074e-01 1.736733642578125000e+03 1.065185189247131348e+00 3.000000000000000000e+00 3.379307861328125000e+02 -7.475000000000000000e+01 5.125000000000000000e+01
3.200000000000000000e+01 8.503153846153848008e+02 4.990506286621093750e+02 -3.682495117187500000e+00 1.279345005750656128e-01 8.235294222831726074e-01 1.710414306640625000e+03 1.305231928825378418e+00 3.000000000000000000e+00 3.731191711425781250e+02 -7.425000000000000000e+01 5.125000000000000000e+01
6.300000000000000000e+01 9.345769230769232081e+02 4.033052673339843750e+02 -3.780456542968750000e+00 2.423627823591232300e-01 2.941176593303680420e-01 1.614542480468750000e+03 7.064871191978454590e-01 4.000000000000000000e+00 5.905162353515625000e+02 -7.175000000000000000e+01 5.125000000000000000e+01
5.600000000000000000e+01 9.701846153846151992e+02 3.995542297363281250e+02 -3.683776855468750000e+00 1.903680115938186646e-01 6.470588445663452148e-01 1.597634033203125000e+03 1.579280257225036621e+00 4.000000000000000000e+00 5.521074218750000000e+02 -7.075000000000000000e+01 5.125000000000000000e+01
2.600000000000000000e+01 1.021161538461538157e+03 4.249665832519531250e+02 -3.573852539062500000e+00 1.572481244802474976e-01 0.000000000000000000e+00 1.590474365234375000e+03 1.494502544403076172e+00 3.000000000000000000e+00 4.880938720703125000e+02 -6.975000000000000000e+01 5.125000000000000000e+01
5.700000000000000000e+01 1.027653846153846189e+03 4.287598571777343750e+02 -3.522369384765625000e+00 1.480740904808044434e-01 0.000000000000000000e+00 1.588810791015625000e+03 1.762648105621337891e+00 4.000000000000000000e+00 4.583989257812500000e+02 -6.925000000000000000e+01 5.125000000000000000e+01
5.700000000000000000e+01 1.049523076923076587e+03 4.426482849121093750e+02 -3.481414794921875000e+00 1.789456605911254883e-01 5.882353186607360840e-01 1.592896240234375000e+03 1.778933286666870117e+00 4.000000000000000000e+00 5.382864990234375000e+02 -6.875000000000000000e+01 5.125000000000000000e+01
5.100000000000000000e+01 1.156546153846153857e+03 5.275209350585937500e+02 -3.325408935546875000e+00 2.735347449779510498e-01 0.000000000000000000e+00 1.608587646484375000e+03 1.668396115303039551e+00 4.000000000000000000e+00 6.462064819335937500e+02 -6.725000000000000000e+01 5.125000000000000000e+01
5.700000000000000000e+01 1.067200000000000273e+03 5.321795043945312500e+02 -3.218261718750000000e+00 2.507760226726531982e-01 2.352941185235977173e-01 1.619543090820312500e+03 1.667085170745849609e+00 4.000000000000000000e+00 6.833673095703125000e+02 -6.675000000000000000e+01 5.125000000000000000e+01
4.200000000000000000e+01 1.006192307692307395e+03 5.411159667968750000e+02 -3.111114501953125000e+00 1.699143052101135254e-01 0.000000000000000000e+00 1.630498657226562500e+03 1.664456129074096680e+00 3.000000000000000000e+00 4.299242553710937500e+02 -6.625000000000000000e+01 5.125000000000000000e+01
4.300000000000000000e+01 9.528076923076921503e+02 5.455806274414062500e+02 -3.003967285156250000e+00 2.621402144432067871e-01 0.000000000000000000e+00 1.641454101562500000e+03 1.655626177787780762e+00 3.000000000000000000e+00 6.357659912109375000e+02 -6.575000000000000000e+01 5.125000000000000000e+01
5.200000000000000000e+01 9.399461538461539476e+02 5.468282470703125000e+02 -2.852661132812500000e+00 1.599492281675338745e-01 3.529411852359771729e-01 1.652648681640625000e+03 1.636385321617126465e+00 4.000000000000000000e+00 5.574034423828125000e+02 -6.525000000000000000e+01 5.125000000000000000e+01
7.100000000000000000e+01 1.017807692307692150e+03 5.421979370117187500e+02 -2.686614990234375000e+00 2.224744558334350586e-01 0.000000000000000000e+00 1.663922973632812500e+03 1.582230806350708008e+00 4.000000000000000000e+00 4.386161193847656250e+02 -6.475000000000000000e+01 5.125000000000000000e+01
1.600000000000000000e+01 1.057361538461538430e+03 5.327091064453125000e+02 -2.520599365234375000e+00 4.069528579711914062e-01 0.000000000000000000e+00 1.675197143554687500e+03 1.554437756538391113e+00 3.000000000000000000e+00 8.348688354492187500e+02 -6.425000000000000000e+01 5.125000000000000000e+01
4.600000000000000000e+01 1.035476923076922958e+03 5.199673461914062500e+02 -2.354583740234375000e+00 2.093195617198944092e-01 2.941176593303680420e-01 1.686471435546875000e+03 1.570714235305786133e+00 4.000000000000000000e+00 5.651628417968750000e+02 -6.375000000000000000e+01 5.125000000000000000e+01
7.400000000000000000e+01 1.066176923076922776e+03 4.996466064453125000e+02 -1.725036621093750000e+00 1.824311912059783936e-01 0.000000000000000000e+00 1.712161499023437500e+03 1.236149430274963379e+00 4.000000000000000000e+00 4.649745178222656250e+02 -6.225000000000000000e+01 5.125000000000000000e+01
7.200000000000000000e+01 1.022392307692308009e+03 5.061279907226562500e+02 -1.482330322265625000e+00 9.999999776482582092e-03 0.000000000000000000e+00 1.712529174804687500e+03 1.119848489761352539e+00 4.000000000000000000e+00 2.762698364257812500e+02 -6.175000000000000000e+01 5.125000000000000000e+01
6.300000000000000000e+01 1.087761538461538521e+03 4.929193725585937500e+02 -7.998352050781250000e-01 9.999999776482582092e-03 0.000000000000000000e+00 1.664089721679687500e+03 1.581003665924072266e+00 4.000000000000000000e+00 3.548988647460937500e+02 -6.075000000000000000e+01 5.125000000000000000e+01
4.200000000000000000e+01 1.104107692307692332e+03 4.672578125000000000e+02 -4.586181640625000000e-01 9.999999776482582092e-03 2.941176593303680420e-01 1.639869995117187500e+03 1.650993704795837402e+00 3.000000000000000000e+00 3.716044311523437500e+02 -6.025000000000000000e+01 5.125000000000000000e+01
5.000000000000000000e+01 1.078446153846153720e+03 4.545556335449218750e+02 -2.210388183593750000e-01 9.999999776482582092e-03 0.000000000000000000e+00 1.621588012695312500e+03 1.705383539199829102e+00 4.000000000000000000e+00 2.605172424316406250e+02 -5.975000000000000000e+01 5.125000000000000000e+01
5.400000000000000000e+01 1.082446153846153948e+03 4.700615844726562500e+02 -8.712768554687500000e-02 0.000000000000000000e+00 0.000000000000000000e+00 1.609243774414062500e+03 1.738311767578125000e+00 4.000000000000000000e+00 2.227319488525390625e+02 -5.925000000000000000e+01 5.125000000000000000e+01
5.100000000000000000e+01 1.110053846153846280e+03 5.357701416015625000e+02 7.412414550781250000e-01 0.000000000000000000e+00 0.000000000000000000e+00 1.528207275390625000e+03 1.485018134117126465e+00 4.000000000000000000e+00 4.306690979003906250e+01 -5.625000000000000000e+01 5.125000000000000000e+01
7.500000000000000000e+01 3.138869230769229944e+03 6.091313476562500000e+02 4.076385498046875000e+00 0.000000000000000000e+00 0.000000000000000000e+00 1.953665161132812500e+03 2.246046304702758789e+00 4.000000000000000000e+00 2.216110687255859375e+02 -1.277500000000000000e+02 5.175000000000000000e+01
7.200000000000000000e+01 2.574500000000000000e+03 5.862507324218750000e+02 3.265502929687500000e+00 0.000000000000000000e+00 0.000000000000000000e+00 1.777806884765625000e+03 1.912869453430175781e+00 4.000000000000000000e+00 8.134819335937500000e+02 -1.272500000000000000e+02 5.175000000000000000e+01
9.000000000000000000e+00 2.026292307692307304e+03 5.151359252929687500e+02 2.714141845703125000e+00 0.000000000000000000e+00 0.000000000000000000e+00 1.718803344726562500e+03 1.767668008804321289e+00 1.000000000000000000e+00 1.326183959960937500e+03 -1.267500000000000000e+02 5.175000000000000000e+01
1.000000000000000000e+00 1.641892307692307895e+03 4.213594360351562500e+02 2.162780761718750000e+00 0.000000000000000000e+00 0.000000000000000000e+00 1.659799804687500000e+03 1.405230164527893066e+00 1.000000000000000000e+00 1.497305419921875000e+03 -1.262500000000000000e+02 5.175000000000000000e+01
5.300000000000000000e+01 1.343299999999999727e+03 3.947579040527343750e+02 1.611419677734375000e+00 0.000000000000000000e+00 2.941176593303680420e-01 1.600796264648437500e+03 1.391751170158386230e+00 4.000000000000000000e+00 1.149692504882812500e+03 -1.257500000000000000e+02 5.175000000000000000e+01
1.400000000000000000e+01 1.135146153846153993e+03 3.057758483886718750e+02 9.088439941406250000e-01 5.433080196380615234e-01 5.294117927551269531e-01 1.496613891601562500e+03 1.393998026847839355e+00 3.000000000000000000e+00 1.956757934570312500e+03 -1.252500000000000000e+02 5.175000000000000000e+01
3.600000000000000000e+01 5.041615384615385551e+02 2.091865386962890625e+02 -5.971374511718750000e-01 0.000000000000000000e+00 0.000000000000000000e+00 1.258129638671875000e+03 1.729506731033325195e+00 3.000000000000000000e+00 1.378151245117187500e+03 -1.242500000000000000e+02 5.175000000000000000e+01
2.900000000000000000e+01 4.719000000000002046e+02 2.581965637207031250e+02 -1.350128173828125000e+00 0.000000000000000000e+00 8.823529481887817383e-01 1.138887573242187500e+03 1.766249537467956543e+00 3.000000000000000000e+00 1.241383178710937500e+03 -1.237500000000000000e+02 5.175000000000000000e+01
2.100000000000000000e+01 3.791692307692309782e+02 2.885184936523437500e+02 -1.521881103515625000e+00 0.000000000000000000e+00 2.352941185235977173e-01 1.174121337890625000e+03 1.791177630424499512e+00 3.000000000000000000e+00 1.283567504882812500e+03 -1.232500000000000000e+02 5.175000000000000000e+01
4.900000000000000000e+01 3.657846153846154493e+02 2.806498413085937500e+02 -1.693603515625000000e+00 0.000000000000000000e+00 0.000000000000000000e+00 1.209355102539062500e+03 1.883111476898193359e+00 4.000000000000000000e+00 1.047333251953125000e+03 -1.227500000000000000e+02 5.175000000000000000e+01
6.900000000000000000e+01 3.804923076923078611e+02 2.592072753906250000e+02 -1.865356445312500000e+00 0.000000000000000000e+00 7.647058963775634766e-01 1.244588867187500000e+03 1.981209754943847656e+00 4.000000000000000000e+00 9.904421997070312500e+02 -1.222500000000000000e+02 5.175000000000000000e+01
6.400000000000000000e+01 4.284692307692308191e+02 2.429413299560546875e+02 -2.097442626953125000e+00 0.000000000000000000e+00 0.000000000000000000e+00 1.251971679687500000e+03 2.008298635482788086e+00 4.000000000000000000e+00 1.064200805664062500e+03 -1.217500000000000000e+02 5.175000000000000000e+01
4.900000000000000000e+01 4.978769230769227647e+02 2.331153411865234375e+02 -2.510528564453125000e+00 0.000000000000000000e+00 2.352941185235977173e-01 1.175801513671875000e+03 2.012546777725219727e+00 4.000000000000000000e+00 1.008172973632812500e+03 -1.212500000000000000e+02 5.175000000000000000e+01
4.200000000000000000e+01 7.029384615384617518e+02 2.535692901611328125e+02 -2.923614501953125000e+00 0.000000000000000000e+00 4.705882370471954346e-01 1.099631469726562500e+03 1.980815768241882324e+00 3.000000000000000000e+00 1.178273071289062500e+03 -1.207500000000000000e+02 5.175000000000000000e+01
5.600000000000000000e+01 7.604000000000000909e+02 2.930364685058593750e+02 -3.336730957031250000e+00 0.000000000000000000e+00 0.000000000000000000e+00 1.023461364746093750e+03 1.908674955368041992e+00 4.000000000000000000e+00 1.415177856445312500e+03 -1.202500000000000000e+02 5.175000000000000000e+01
5.800000000000000000e+01 1.033500000000000227e+03 3.944580078125000000e+02 -3.598480224609375000e+00 9.999999776482582092e-03 2.941176593303680420e-01 9.887588500976562500e+02 1.741578102111816406e+00 4.000000000000000000e+00 1.168028198242187500e+03 -1.197500000000000000e+02 5.175000000000000000e+01
4.800000000000000000e+01 1.134476923076922958e+03 4.863350524902343750e+02 -3.708892822265625000e+00 9.999999776482582092e-03 0.000000000000000000e+00 9.955238647460937500e+02 1.667719960212707520e+00 4.000000000000000000e+00 1.681588256835937500e+03 -1.192500000000000000e+02 5.175000000000000000e+01
5.500000000000000000e+01 1.331876923076923276e+03 5.290398559570312500e+02 -3.819335937500000000e+00 0.000000000000000000e+00 5.294117927551269531e-01 1.002288879394531250e+03 1.515022158622741699e+00 4.000000000000000000e+00 1.239281860351562500e+03 -1.187500000000000000e+02 5.175000000000000000e+01
6.200000000000000000e+01 1.401353846153846916e+03 5.487744140625000000e+02 -3.752990722656250000e+00 9.999999776482582092e-03 2.352941185235977173e-01 1.068021484375000000e+03 1.212414979934692383e+00 4.000000000000000000e+00 1.677941894531250000e+03 -1.177500000000000000e+02 5.175000000000000000e+01
5.300000000000000000e+01 6.266076923076924459e+02 2.601325683593750000e+02 -2.018798828125000000e+00 0.000000000000000000e+00 2.941176593303680420e-01 1.538041748046875000e+03 1.630504131317138672e+00 4.000000000000000000e+00 1.649852539062500000e+03 -1.152500000000000000e+02 5.175000000000000000e+01
1.900000000000000000e+01 5.343999999999998636e+02 2.319320526123046875e+02 -1.560485839843750000e+00 0.000000000000000000e+00 1.764705926179885864e-01 1.658499267578125000e+03 1.772187113761901855e+00 3.000000000000000000e+00 1.160038574218750000e+03 -1.147500000000000000e+02 5.175000000000000000e+01
6.000000000000000000e+00 3.401230769230768942e+02 1.389890136718750000e+02 1.076721191406250000e+00 0.000000000000000000e+00 0.000000000000000000e+00 2.375754150390625000e+03 3.317130088806152344e+00 1.000000000000000000e+00 8.072971191406250000e+02 -1.117500000000000000e+02 5.175000000000000000e+01
5.000000000000000000e+00 3.084384615384615813e+02 1.238668746948242188e+02 1.361785888671875000e+00 0.000000000000000000e+00 0.000000000000000000e+00 2.472066650390625000e+03 3.302870512008666992e+00 1.000000000000000000e+00 7.660095825195312500e+02 -1.112500000000000000e+02 5.175000000000000000e+01
5.000000000000000000e+00 3.212615384615385210e+02 1.234337463378906250e+02 1.646820068359375000e+00 0.000000000000000000e+00 0.000000000000000000e+00 2.568379150390625000e+03 3.341025352478027344e+00 1.000000000000000000e+00 7.534255981445312500e+02 -1.107500000000000000e+02 5.175000000000000000e+01
6.000000000000000000e+00 3.288923076923075541e+02 1.250182342529296875e+02 1.688720703125000000e+00 0.000000000000000000e+00 0.000000000000000000e+00 2.611253662109375000e+03 3.380146980285644531e+00 1.000000000000000000e+00 6.708427734375000000e+02 -1.102500000000000000e+02 5.175000000000000000e+01
5.000000000000000000e+00 3.309769230769232990e+02 1.343179626464843750e+02 1.649566650390625000e+00 0.000000000000000000e+00 0.000000000000000000e+00 2.636315429687500000e+03 3.390677928924560547e+00 1.000000000000000000e+00 7.191429443359375000e+02 -1.097500000000000000e+02 5.175000000000000000e+01
2.000000000000000000e+00 3.241846153846154266e+02 1.481765136718750000e+02 1.610412597656250000e+00 0.000000000000000000e+00 0.000000000000000000e+00 2.661377197265625000e+03 3.395056009292602539e+00 1.000000000000000000e+00 7.056986083984375000e+02 -1.092500000000000000e+02 5.175000000000000000e+01
0.000000000000000000e+00 3.238384615384615017e+02 1.584577789306640625e+02 1.571289062500000000e+00 0.000000000000000000e+00 3.529411852359771729e-01 2.686438964843750000e+03 3.385730504989624023e+00 1.000000000000000000e+00 6.258101196289062500e+02 -1.087500000000000000e+02 5.175000000000000000e+01
2.000000000000000000e+00 3.300384615384618314e+02 1.705020294189453125e+02 1.302551269531250000e+00 0.000000000000000000e+00 0.000000000000000000e+00 2.662869384765625000e+03 3.403754711151123047e+00 1.000000000000000000e+00 6.747471923828125000e+02 -1.082500000000000000e+02 5.175000000000000000e+01
6.000000000000000000e+00 3.229846153846153243e+02 2.678687744140625000e+02 7.651062011718750000e-01 0.000000000000000000e+00 5.882353186607360840e-01 2.615729980468750000e+03 3.454234838485717773e+00 1.000000000000000000e+00 5.342119750976562500e+02 -1.072500000000000000e+02 5.175000000000000000e+01
1.800000000000000000e+01 4.575384615384614904e+02 2.036488189697265625e+02 -6.492004394531250000e-01 0.000000000000000000e+00 1.294117689132690430e+00 2.457696777343750000e+03 3.221464872360229492e+00 3.000000000000000000e+00 5.312339477539062500e+02 -1.032500000000000000e+02 5.175000000000000000e+01
5.000000000000000000e+01 5.407307692307692832e+02 1.753310699462890625e+02 -3.235473632812500000e-01 9.999999776482582092e-03 1.470588207244873047e+00 2.509095703125000000e+03 8.239580988883972168e-01 4.000000000000000000e+00 6.545857543945312500e+02 -1.012500000000000000e+02 5.175000000000000000e+01
5.500000000000000000e+01 5.746384615384615699e+02 1.523570404052734375e+02 -2.473449707031250000e-01 9.999999776482582092e-03 0.000000000000000000e+00 2.519489746093750000e+03 8.342844843864440918e-01 4.000000000000000000e+00 6.775545043945312500e+02 -1.007500000000000000e+02 5.175000000000000000e+01
3.300000000000000000e+01 5.681461538461535383e+02 1.583875274658203125e+02 -2.365417480468750000e-01 0.000000000000000000e+00 0.000000000000000000e+00 2.542077880859375000e+03 2.142712116241455078e+00 3.000000000000000000e+00 2.267123107910156250e+02 -9.775000000000000000e+01 5.175000000000000000e+01
5.700000000000000000e+01 6.481076923076924459e+02 1.584712524414062500e+02 -8.197937011718750000e-01 0.000000000000000000e+00 0.000000000000000000e+00 2.439498535156250000e+03 1.348933815956115723e+00 4.000000000000000000e+00 2.523748016357421875e+02 -9.625000000000000000e+01 5.175000000000000000e+01
3.700000000000000000e+01 6.571692307692311488e+02 1.724028930664062500e+02 -1.040832519531250000e+00 0.000000000000000000e+00 0.000000000000000000e+00 2.398835937500000000e+03 8.566977977752685547e-01 3.000000000000000000e+00 2.947053222656250000e+02 -9.575000000000000000e+01 5.175000000000000000e+01
4.400000000000000000e+01 6.640538461538459387e+02 1.981836242675781250e+02 -1.226226806640625000e+00 0.000000000000000000e+00 0.000000000000000000e+00 2.362881347656250000e+03 8.548655509948730469e-01 3.000000000000000000e+00 3.178142395019531250e+02 -9.525000000000000000e+01 5.175000000000000000e+01
4.600000000000000000e+01 6.754692307692305349e+02 2.217744140625000000e+02 -1.399688720703125000e+00 0.000000000000000000e+00 5.294117927551269531e-01 2.328496337890625000e+03 8.926151990890502930e-01 4.000000000000000000e+00 3.568327331542968750e+02 -9.475000000000000000e+01 5.175000000000000000e+01
6.700000000000000000e+01 6.883846153846152447e+02 2.307762451171875000e+02 -1.573150634765625000e+00 0.000000000000000000e+00 0.000000000000000000e+00 2.294111083984375000e+03 8.563698530197143555e-01 4.000000000000000000e+00 3.766885681152343750e+02 -9.425000000000000000e+01 5.175000000000000000e+01
7.000000000000000000e+01 7.268230769230768828e+02 2.359168243408203125e+02 -1.844024658203125000e+00 9.999999776482582092e-03 2.352941185235977173e-01 2.231861816406250000e+03 8.540167808532714844e-01 4.000000000000000000e+00 3.710452270507812500e+02 -9.325000000000000000e+01 5.175000000000000000e+01
6.500000000000000000e+01 7.652461538461536747e+02 2.430503540039062500e+02 -1.941467285156250000e+00 9.999999776482582092e-03 0.000000000000000000e+00 2.203997802734375000e+03 1.270099163055419922e+00 4.000000000000000000e+00 3.767803039550781250e+02 -9.275000000000000000e+01 5.175000000000000000e+01
6.000000000000000000e+01 7.849615384615384528e+02 2.593625793457031250e+02 -2.038879394531250000e+00 9.999999776482582092e-03 0.000000000000000000e+00 2.176133789062500000e+03 2.036841869354248047e+00 4.000000000000000000e+00 4.260244445800781250e+02 -9.225000000000000000e+01 5.175000000000000000e+01
3.800000000000000000e+01 7.865230769230768146e+02 2.736322021484375000e+02 -2.129058837890625000e+00 9.999999776482582092e-03 0.000000000000000000e+00 2.150371093750000000e+03 2.054738521575927734e+00 3.000000000000000000e+00 4.024723510742187500e+02 -9.175000000000000000e+01 5.175000000000000000e+01
4.700000000000000000e+01 7.997923076923077588e+02 2.794877014160156250e+02 -2.197540283203125000e+00 9.999999776482582092e-03 1.176470592617988586e-01 2.130913085937500000e+03 2.050609588623046875e+00 4.000000000000000000e+00 4.109045410156250000e+02 -9.125000000000000000e+01 5.175000000000000000e+01
5.300000000000000000e+01 8.263153846153842323e+02 2.775797119140625000e+02 -2.414367675781250000e+00 9.999999776482582092e-03 0.000000000000000000e+00 2.073620361328125000e+03 1.951764822006225586e+00 4.000000000000000000e+00 3.343794555664062500e+02 -8.975000000000000000e+01 5.175000000000000000e+01
6.300000000000000000e+01 7.947000000000002728e+02 2.799619750976562500e+02 -2.505615234375000000e+00 9.999999776482582092e-03 2.941176593303680420e-01 2.056325195312500000e+03 1.930334210395812988e+00 4.000000000000000000e+00 3.554184265136718750e+02 -8.925000000000000000e+01 5.175000000000000000e+01
6.100000000000000000e+01 7.654230769230770193e+02 2.804002685546875000e+02 -2.596862792968750000e+00 1.122075244784355164e-01 1.764705926179885864e-01 2.039029785156250000e+03 1.929625868797302246e+00 4.000000000000000000e+00 3.413318786621093750e+02 -8.875000000000000000e+01 5.175000000000000000e+01
5.300000000000000000e+01 7.394615384615385665e+02 2.807745361328125000e+02 -2.688140869140625000e+00 9.999999776482582092e-03 0.000000000000000000e+00 2.021734497070312500e+03 1.403125286102294922e+00 4.000000000000000000e+00 3.175368957519531250e+02 -8.825000000000000000e+01 5.175000000000000000e+01
5.200000000000000000e+01 7.088999999999997499e+02 2.846239318847656250e+02 -2.842315673828125000e+00 1.030334755778312683e-01 0.000000000000000000e+00 1.998558105468750000e+03 1.936451792716979980e+00 4.000000000000000000e+00 2.684226989746093750e+02 -8.725000000000000000e+01 5.175000000000000000e+01
3.000000000000000000e+01 6.987461538461539021e+02 2.905015563964843750e+02 -2.917419433593750000e+00 9.999999776482582092e-03 5.882352963089942932e-02 1.987785278320312500e+03 1.769243359565734863e+00 3.000000000000000000e+00 2.208514251708984375e+02 -8.675000000000000000e+01 5.175000000000000000e+01
4.500000000000000000e+01 6.779153846153848235e+02 2.941304626464843750e+02 -2.992492675781250000e+00 9.999999776482582092e-03 2.352941185235977173e-01 1.977012329101562500e+03 1.949947953224182129e+00 4.000000000000000000e+00 1.739680328369140625e+02 -8.625000000000000000e+01 5.175000000000000000e+01
2.300000000000000000e+01 6.680461538461541977e+02 3.013848876953125000e+02 -2.968841552734375000e+00 9.999999776482582092e-03 0.000000000000000000e+00 1.979342163085937500e+03 1.948522806167602539e+00 3.000000000000000000e+00 1.646343383789062500e+02 -8.575000000000000000e+01 5.175000000000000000e+01
4.500000000000000000e+01 6.548846153846153584e+02 3.160783691406250000e+02 -2.945190429687500000e+00 9.999999776482582092e-03 0.000000000000000000e+00 1.981672119140625000e+03 1.937449336051940918e+00 4.000000000000000000e+00 1.575185241699218750e+02 -8.525000000000000000e+01 5.175000000000000000e+01
2.600000000000000000e+01 6.481538461538461888e+02 3.396916198730468750e+02 -2.921569824218750000e+00 9.999999776482582092e-03 0.000000000000000000e+00 1.984001953125000000e+03 1.927267909049987793e+00 3.000000000000000000e+00 1.638378295898437500e+02 -8.475000000000000000e+01 5.175000000000000000e+01
3.700000000000000000e+01 6.403692307692308532e+02 3.623471984863281250e+02 -2.865783691406250000e+00 9.999999776482582092e-03 0.000000000000000000e+00 1.988518188476562500e+03 1.917324662208557129e+00 3.000000000000000000e+00 1.069773864746093750e+02 -8.425000000000000000e+01 5.175000000000000000e+01
3.600000000000000000e+01 6.279461538461538339e+02 3.626140747070312500e+02 -2.561401367187500000e+00 9.999999776482582092e-03 0.000000000000000000e+00 2.010668579101562500e+03 1.906418800354003906e+00 3.000000000000000000e+00 6.965806579589843750e+01 -8.325000000000000000e+01 5.175000000000000000e+01
1.200000000000000000e+01 6.275076923076921958e+02 3.544058532714843750e+02 -2.409210205078125000e+00 9.999999776482582092e-03 0.000000000000000000e+00 2.021743774414062500e+03 1.897459149360656738e+00 3.000000000000000000e+00 6.332442474365234375e+01 -8.275000000000000000e+01 5.175000000000000000e+01
1.600000000000000000e+01 6.176692307692309214e+02 3.480152893066406250e+02 -2.479064941406250000e+00 9.999999776482582092e-03 0.000000000000000000e+00 1.950198608398437500e+03 1.888184905052185059e+00 3.000000000000000000e+00 5.769877624511718750e+01 -8.225000000000000000e+01 5.175000000000000000e+01
1.700000000000000000e+01 6.162923076923078725e+02 3.397947082519531250e+02 -3.062866210937500000e+00 9.999999776482582092e-03 0.000000000000000000e+00 1.641867675781250000e+03 1.866352319717407227e+00 3.000000000000000000e+00 3.465790557861328125e+01 -8.125000000000000000e+01 5.175000000000000000e+01
1.600000000000000000e+01 7.184692307692306485e+02 3.671546630859375000e+02 -2.415588378906250000e+00 1.012064889073371887e-01 0.000000000000000000e+00 1.951704345703125000e+03 7.488520145416259766e-01 3.000000000000000000e+00 6.597674560546875000e+01 -7.825000000000000000e+01 5.175000000000000000e+01
2.700000000000000000e+01 7.294153846153844825e+02 3.825723876953125000e+02 -2.652862548828125000e+00 1.190177798271179199e-01 5.882353186607360840e-01 1.908853515625000000e+03 7.451215982437133789e-01 3.000000000000000000e+00 1.578467102050781250e+02 -7.775000000000000000e+01 5.175000000000000000e+01
1.300000000000000000e+01 7.470538461538463935e+02 3.991633911132812500e+02 -2.890136718750000000e+00 1.287701874971389771e-01 1.117647051811218262e+00 1.866002563476562500e+03 7.388435602188110352e-01 3.000000000000000000e+00 1.890024108886718750e+02 -7.725000000000000000e+01 5.175000000000000000e+01
3.900000000000000000e+01 7.868153846153849145e+02 4.101763610839843750e+02 -3.126312255859375000e+00 1.496048718690872192e-01 1.117647051811218262e+00 1.824170776367187500e+03 7.282211780548095703e-01 3.000000000000000000e+00 2.167120971679687500e+02 -7.675000000000000000e+01 5.175000000000000000e+01
2.100000000000000000e+01 8.018153846153844597e+02 4.264878845214843750e+02 -3.359161376953125000e+00 1.494865864515304565e-01 8.823529481887817383e-01 1.785396606445312500e+03 7.249160408973693848e-01 3.000000000000000000e+00 2.480408325195312500e+02 -7.625000000000000000e+01 5.175000000000000000e+01
2.500000000000000000e+01 7.938923076923080089e+02 4.564768676757812500e+02 -3.591979980468750000e+00 1.600692570209503174e-01 5.882353186607360840e-01 1.746622436523437500e+03 1.172315955162048340e+00 3.000000000000000000e+00 2.887433471679687500e+02 -7.575000000000000000e+01 5.175000000000000000e+01
1.700000000000000000e+01 8.116153846153848690e+02 4.760712585449218750e+02 -3.824829101562500000e+00 1.709001511335372925e-01 6.470588445663452148e-01 1.707848266601562500e+03 1.785909652709960938e+00 3.000000000000000000e+00 3.040672302246093750e+02 -7.525000000000000000e+01 5.175000000000000000e+01
3.300000000000000000e+01 8.319076923076924004e+02 4.792500000000000000e+02 -3.992218017578125000e+00 1.741609722375869751e-01 6.470588445663452148e-01 1.675147949218750000e+03 1.766375422477722168e+00 3.000000000000000000e+00 3.550698852539062500e+02 -7.475000000000000000e+01 5.175000000000000000e+01
2.000000000000000000e+01 8.778846153846151310e+02 4.544583740234375000e+02 -4.196044921875000000e+00 2.027455866336822510e-01 7.058823704719543457e-01 1.621895019531250000e+03 1.108539104461669922e+00 3.000000000000000000e+00 3.644943847656250000e+02 -7.375000000000000000e+01 5.175000000000000000e+01
2.800000000000000000e+01 8.781384615384615699e+02 4.276207885742187500e+02 -4.297973632812500000e+00 2.097456902265548706e-01 2.941176593303680420e-01 1.595268432617187500e+03 7.013915777206420898e-01 3.000000000000000000e+00 4.004848937988281250e+02 -7.325000000000000000e+01 5.175000000000000000e+01
4.200000000000000000e+01 8.718461538461541522e+02 4.129934082031250000e+02 -4.289978027343750000e+00 4.246814250946044922e-01 9.411764740943908691e-01 1.577469482421875000e+03 7.028717994689941406e-01 3.000000000000000000e+00 7.321055908203125000e+02 -7.275000000000000000e+01 5.175000000000000000e+01
3.700000000000000000e+01 8.955692307692307850e+02 4.098009643554687500e+02 -4.245330810546875000e+00 3.465285897254943848e-01 7.058823704719543457e-01 1.562612792968750000e+03 6.927921175956726074e-01 3.000000000000000000e+00 6.887566528320312500e+02 -7.225000000000000000e+01 5.175000000000000000e+01
2.300000000000000000e+01 9.206846153846150855e+02 4.029869689941406250e+02 -4.156066894531250000e+00 2.767788171768188477e-01 5.882353186607360840e-01 1.532899658203125000e+03 1.176972508430480957e+00 3.000000000000000000e+00 5.872561645507812500e+02 -7.125000000000000000e+01 5.175000000000000000e+01
2.300000000000000000e+01 9.583230769230772239e+02 4.095215148925781250e+02 -4.110290527343750000e+00 3.187821209430694580e-01 6.470588445663452148e-01 1.526789672851562500e+03 1.397296190261840820e+00 3.000000000000000000e+00 6.657482299804687500e+02 -7.075000000000000000e+01 5.175000000000000000e+01
3.800000000000000000e+01 9.647769230769231399e+02 4.187834777832031250e+02 -4.064483642578125000e+00 2.708097100257873535e-01 2.941176593303680420e-01 1.520679687500000000e+03 1.472786426544189453e+00 3.000000000000000000e+00 5.459584960937500000e+02 -7.025000000000000000e+01 5.175000000000000000e+01
4.000000000000000000e+01 9.901615384615391804e+02 4.235581665039062500e+02 -4.018676757812500000e+00 2.183318585157394409e-01 2.941176593303680420e-01 1.514569702148437500e+03 1.146573781967163086e+00 3.000000000000000000e+00 5.573703613281250000e+02 -6.975000000000000000e+01 5.175000000000000000e+01
6.600000000000000000e+01 1.090684615384615199e+03 4.618108520507812500e+02 -3.997467041015625000e+00 2.732339799404144287e-01 5.882353186607360840e-01 1.506714355468750000e+03 1.480509877204895020e+00 4.000000000000000000e+00 5.400775756835937500e+02 -6.825000000000000000e+01 5.175000000000000000e+01
5.500000000000000000e+01 1.112500000000000455e+03 4.859584655761718750e+02 -4.003295898437500000e+00 3.411627113819122314e-01 0.000000000000000000e+00 1.505259765625000000e+03 8.133096694946289062e-01 4.000000000000000000e+00 8.259348754882812500e+02 -6.775000000000000000e+01 5.175000000000000000e+01
6.400000000000000000e+01 1.074738461538461706e+03 4.961128845214843750e+02 -3.991607666015625000e+00 5.152075886726379395e-01 0.000000000000000000e+00 1.507241577148437500e+03 1.133127808570861816e+00 4.000000000000000000e+00 8.089524536132812500e+02 -6.725000000000000000e+01 5.175000000000000000e+01
5.000000000000000000e+01 9.602153846153850054e+02 4.992331542968750000e+02 -3.962432861328125000e+00 2.340245246887207031e-01 0.000000000000000000e+00 1.512660034179687500e+03 1.414535045623779297e+00 4.000000000000000000e+00 6.348272094726562500e+02 -6.675000000000000000e+01 5.175000000000000000e+01
4.600000000000000000e+01 8.733461538461542659e+02 5.062237548828125000e+02 -3.933258056640625000e+00 2.454797327518463135e-01 0.000000000000000000e+00 1.518078369140625000e+03 1.151910781860351562e+00 4.000000000000000000e+00 6.174445800781250000e+02 -6.625000000000000000e+01 5.175000000000000000e+01
5.000000000000000000e+01 7.919076923076924004e+02 5.076701354980468750e+02 -3.904052734375000000e+00 3.030402958393096924e-01 0.000000000000000000e+00 1.523496704101562500e+03 1.658243060111999512e+00 4.000000000000000000e+00 6.946812744140625000e+02 -6.575000000000000000e+01 5.175000000000000000e+01
2.300000000000000000e+01 8.330923076923079407e+02 5.000891113281250000e+02 -3.810241699218750000e+00 3.155253529548645020e-01 6.470588445663452148e-01 1.532558959960937500e+03 1.628576517105102539e+00 3.000000000000000000e+00 6.610869140625000000e+02 -6.525000000000000000e+01 5.175000000000000000e+01
5.200000000000000000e+01 9.535615384615388166e+02 4.842623291015625000e+02 -3.694854736328125000e+00 3.893578648567199707e-01 0.000000000000000000e+00 1.542835937500000000e+03 1.566599130630493164e+00 4.000000000000000000e+00 7.067975463867187500e+02 -6.475000000000000000e+01 5.175000000000000000e+01
4.900000000000000000e+01 9.762846153846154493e+02 4.674471740722656250e+02 -3.579467773437500000e+00 3.731388747692108154e-01 5.882353186607360840e-01 1.553112915039062500e+03 1.554082036018371582e+00 4.000000000000000000e+00 7.424209594726562500e+02 -6.425000000000000000e+01 5.175000000000000000e+01
5.100000000000000000e+01 9.951692307692308077e+02 4.473559265136718750e+02 -3.247222900390625000e+00 2.726007103919982910e-01 0.000000000000000000e+00 1.575050170898437500e+03 1.576299190521240234e+00 4.000000000000000000e+00 6.065104980468750000e+02 -6.325000000000000000e+01 5.175000000000000000e+01
2.300000000000000000e+01 9.934769230769228443e+02 4.440148315429687500e+02 -3.030334472656250000e+00 2.055884301662445068e-01 0.000000000000000000e+00 1.586710571289062500e+03 1.587542295455932617e+00 3.000000000000000000e+00 5.578904418945312500e+02 -6.275000000000000000e+01 5.175000000000000000e+01
6.200000000000000000e+01 1.040815384615384119e+03 4.462725219726562500e+02 -2.813446044921875000e+00 1.802226006984710693e-01 0.000000000000000000e+00 1.598370849609375000e+03 1.603137731552124023e+00 4.000000000000000000e+00 4.587349853515625000e+02 -6.225000000000000000e+01 5.175000000000000000e+01
6.000000000000000000e+01 1.091361538461538430e+03 4.771199340820312500e+02 -1.848205566406250000e+00 1.323461979627609253e-01 0.000000000000000000e+00 1.593658325195312500e+03 1.617668032646179199e+00 4.000000000000000000e+00 4.619710388183593750e+02 -6.075000000000000000e+01 5.175000000000000000e+01
1.200000000000000000e+01 1.085969230769231444e+03 4.726251831054687500e+02 -1.491485595703125000e+00 9.999999776482582092e-03 5.882353186607360840e-01 1.587677124023437500e+03 1.647513508796691895e+00 3.000000000000000000e+00 3.662077026367187500e+02 -6.025000000000000000e+01 5.175000000000000000e+01
5.300000000000000000e+01 1.075253846153846325e+03 5.047204284667968750e+02 -9.715576171875000000e-01 9.999999776482582092e-03 0.000000000000000000e+00 1.579832519531250000e+03 1.703101754188537598e+00 4.000000000000000000e+00 3.769444580078125000e+02 -5.925000000000000000e+01 5.175000000000000000e+01
5.000000000000000000e+01 1.084092307692307941e+03 5.393085327148437500e+02 -7.438659667968750000e-01 9.999999776482582092e-03 1.176470592617988586e-01 1.576596557617187500e+03 1.682635307312011719e+00 4.000000000000000000e+00 2.613114929199218750e+02 -5.875000000000000000e+01 5.175000000000000000e+01
7.000000000000000000e+01 1.118753846153846553e+03 5.544877319335937500e+02 -5.161437988281250000e-01 0.000000000000000000e+00 0.000000000000000000e+00 1.573360595703125000e+03 1.638965725898742676e+00 4.000000000000000000e+00 2.338056640625000000e+02 -5.825000000000000000e+01 5.175000000000000000e+01
5.700000000000000000e+01 1.162984615384615836e+03 5.581643066406250000e+02 -2.987670898437500000e-01 9.999999776482582092e-03 0.000000000000000000e+00 1.565868896484375000e+03 1.449099779129028320e+00 4.000000000000000000e+00 3.452944641113281250e+02 -5.775000000000000000e+01 5.175000000000000000e+01
2.000000000000000000e+00 1.855730769230769738e+03 4.157297668457031250e+02 1.547180175781250000e+00 0.000000000000000000e+00 2.941176593303680420e-01 1.437577636718750000e+03 1.704167246818542480e+00 1.000000000000000000e+00 1.282362915039062500e+03 -1.267500000000000000e+02 5.225000000000000000e+01
0.000000000000000000e+00 1.420015384615384619e+03 2.824417419433593750e+02 1.138641357421875000e+00 9.999999776482582092e-03 0.000000000000000000e+00 1.435503295898437500e+03 1.542563080787658691e+00 1.000000000000000000e+00 1.820341186523437500e+03 -1.262500000000000000e+02 5.225000000000000000e+01
1.800000000000000000e+01 1.115653846153846189e+03 2.867966918945312500e+02 7.301330566406250000e-01 0.000000000000000000e+00 5.882352963089942932e-02 1.433428955078125000e+03 1.539183735847473145e+00 3.000000000000000000e+00 9.160560913085937500e+02 -1.257500000000000000e+02 5.225000000000000000e+01
4.000000000000000000e+01 8.167076923076923549e+02 2.245036926269531250e+02 2.458496093750000000e-01 0.000000000000000000e+00 0.000000000000000000e+00 1.399140991210937500e+03 1.623943567276000977e+00 3.000000000000000000e+00 1.219189819335937500e+03 -1.252500000000000000e+02 5.225000000000000000e+01
4.800000000000000000e+01 6.171615384615383846e+02 1.376041259765625000e+02 -2.636413574218750000e-01 9.999999776482582092e-03 0.000000000000000000e+00 1.354114990234375000e+03 1.722468733787536621e+00 4.000000000000000000e+00 1.544017211914062500e+03 -1.247500000000000000e+02 5.225000000000000000e+01
3.000000000000000000e+01 4.260769230769229807e+02 1.394813842773437500e+02 -7.731628417968750000e-01 0.000000000000000000e+00 0.000000000000000000e+00 1.309089111328125000e+03 1.849372386932373047e+00 3.000000000000000000e+00 1.122523559570312500e+03 -1.242500000000000000e+02 5.225000000000000000e+01
2.300000000000000000e+01 3.578076923076923208e+02 1.776664733886718750e+02 -1.282684326171875000e+00 0.000000000000000000e+00 0.000000000000000000e+00 1.264063110351562500e+03 1.903648257255554199e+00 3.000000000000000000e+00 1.088967285156250000e+03 -1.237500000000000000e+02 5.225000000000000000e+01
2.500000000000000000e+01 3.729692307692308191e+02 2.211523437500000000e+02 -1.548675537109375000e+00 0.000000000000000000e+00 5.294117927551269531e-01 1.251667480468750000e+03 1.885615944862365723e+00 3.000000000000000000e+00 1.183639892578125000e+03 -1.232500000000000000e+02 5.225000000000000000e+01
3.700000000000000000e+01 4.227615384615384073e+02 2.376499176025390625e+02 -1.814666748046875000e+00 0.000000000000000000e+00 7.058823704719543457e-01 1.239271728515625000e+03 1.910413146018981934e+00 3.000000000000000000e+00 1.142759277343750000e+03 -1.227500000000000000e+02 5.225000000000000000e+01
5.700000000000000000e+01 4.210538461538462798e+02 2.556651306152343750e+02 -2.080657958984375000e+00 0.000000000000000000e+00 0.000000000000000000e+00 1.226876098632812500e+03 2.032485723495483398e+00 4.000000000000000000e+00 6.825238647460937500e+02 -1.222500000000000000e+02 5.225000000000000000e+01
4.700000000000000000e+01 5.336384615384616836e+02 2.580588989257812500e+02 -2.396759033203125000e+00 0.000000000000000000e+00 0.000000000000000000e+00 1.191489746093750000e+03 2.029155731201171875e+00 4.000000000000000000e+00 1.021844177246093750e+03 -1.217500000000000000e+02 5.225000000000000000e+01
5.900000000000000000e+01 6.892769230769231399e+02 2.678727722167968750e+02 -2.863189697265625000e+00 0.000000000000000000e+00 0.000000000000000000e+00 1.087131103515625000e+03 1.940292000770568848e+00 4.000000000000000000e+00 1.251373779296875000e+03 -1.212500000000000000e+02 5.225000000000000000e+01
5.300000000000000000e+01 1.090807692307692378e+03 4.704992370605468750e+02 -4.090759277343750000e+00 0.000000000000000000e+00 0.000000000000000000e+00 8.513366699218750000e+02 1.115306973457336426e+00 4.000000000000000000e+00 1.094031372070312500e+03 -1.192500000000000000e+02 5.225000000000000000e+01
4.000000000000000000e+01 1.115984615384616063e+03 4.754613647460937500e+02 -4.131774902343750000e+00 0.000000000000000000e+00 0.000000000000000000e+00 8.680714721679687500e+02 1.294304728507995605e+00 3.000000000000000000e+00 1.940713012695312500e+03 -1.187500000000000000e+02 5.225000000000000000e+01
2.000000000000000000e+00 1.090961538461538566e+03 4.635611877441406250e+02 -4.172760009765625000e+00 5.347923636436462402e-01 0.000000000000000000e+00 8.848062133789062500e+02 7.139617800712585449e-01 1.000000000000000000e+00 1.941091064453125000e+03 -1.182500000000000000e+02 5.225000000000000000e+01
5.100000000000000000e+01 6.923461538461538112e+02 3.486440734863281250e+02 -2.682189941406250000e+00 9.999999776482582092e-03 2.941176593303680420e-01 1.337448974609375000e+03 1.431113123893737793e+00 4.000000000000000000e+00 1.920178222656250000e+03 -1.162500000000000000e+02 5.225000000000000000e+01
5.700000000000000000e+01 6.441846153846155403e+02 2.853277587890625000e+02 -2.289581298828125000e+00 0.000000000000000000e+00 0.000000000000000000e+00 1.444842285156250000e+03 1.583703875541687012e+00 4.000000000000000000e+00 1.524180908203125000e+03 -1.157500000000000000e+02 5.225000000000000000e+01
3.600000000000000000e+01 5.869846153846154948e+02 2.540787200927734375e+02 -1.896972656250000000e+00 0.000000000000000000e+00 0.000000000000000000e+00 1.552235595703125000e+03 1.792163968086242676e+00 3.000000000000000000e+00 1.225608032226562500e+03 -1.152500000000000000e+02 5.225000000000000000e+01
5.000000000000000000e+00 3.926923076923076792e+02 1.453413391113281250e+02 8.758850097656250000e-01 0.000000000000000000e+00 2.941176593303680420e-01 2.334419433593750000e+03 3.323366880416870117e+00 1.000000000000000000e+00 7.581229858398437500e+02 -1.117500000000000000e+02 5.225000000000000000e+01
3.000000000000000000e+00 3.797846153846153925e+02 1.303087158203125000e+02 1.105438232421875000e+00 0.000000000000000000e+00 5.882352963089942932e-02 2.421272460937500000e+03 3.303083181381225586e+00 1.000000000000000000e+00 7.669839477539062500e+02 -1.112500000000000000e+02 5.225000000000000000e+01
6.000000000000000000e+00 3.758999999999999773e+02 1.305256652832031250e+02 1.334991455078125000e+00 0.000000000000000000e+00 0.000000000000000000e+00 2.508125244140625000e+03 3.315335750579833984e+00 1.000000000000000000e+00 6.926364746093750000e+02 -1.107500000000000000e+02 5.225000000000000000e+01
1.000000000000000000e+00 3.866384615384616836e+02 1.344821472167968750e+02 1.328002929687500000e+00 0.000000000000000000e+00 0.000000000000000000e+00 2.541844726562500000e+03 3.337440490722656250e+00 1.000000000000000000e+00 6.803093261718750000e+02 -1.102500000000000000e+02 5.225000000000000000e+01
3.700000000000000000e+01 4.841384615384613426e+02 2.054080657958984375e+02 -9.510803222656250000e-01 0.000000000000000000e+00 4.117647111415863037e-01 2.400094970703125000e+03 2.516417741775512695e+00 3.000000000000000000e+00 6.456119384765625000e+02 -1.032500000000000000e+02 5.225000000000000000e+01
4.900000000000000000e+01 4.902307692307691127e+02 2.156472015380859375e+02 -8.706665039062500000e-01 0.000000000000000000e+00 0.000000000000000000e+00 2.413161132812500000e+03 1.738768935203552246e+00 4.000000000000000000e+00 5.800095825195312500e+02 -1.027500000000000000e+02 5.225000000000000000e+01
5.500000000000000000e+01 5.044846153846153811e+02 2.175328216552734375e+02 -7.565917968750000000e-01 0.000000000000000000e+00 0.000000000000000000e+00 2.430214599609375000e+03 8.585768938064575195e-01 4.000000000000000000e+00 5.241331176757812500e+02 -1.022500000000000000e+02 5.225000000000000000e+01
3.800000000000000000e+01 5.151230769230770647e+02 2.032028961181640625e+02 -6.425170898437500000e-01 0.000000000000000000e+00 0.000000000000000000e+00 2.447268310546875000e+03 8.203011751174926758e-01 3.000000000000000000e+00 5.744323120117187500e+02 -1.017500000000000000e+02 5.225000000000000000e+01
6.000000000000000000e+00 5.341923076923076223e+02 1.796724243164062500e+02 -5.284729003906250000e-01 0.000000000000000000e+00 2.941176593303680420e-01 2.464321777343750000e+03 1.507764697074890137e+00 1.000000000000000000e+00 3.206966857910156250e+02 -1.012500000000000000e+02 5.225000000000000000e+01
5.700000000000000000e+01 5.575615384615385892e+02 1.604437866210937500e+02 -4.620056152343750000e-01 0.000000000000000000e+00 1.352941155433654785e+00 2.472846923828125000e+03 1.084669947624206543e+00 4.000000000000000000e+00 3.237557067871093750e+02 -1.007500000000000000e+02 5.225000000000000000e+01
3.900000000000000000e+01 4.990846153846153470e+02 1.206661987304687500e+02 -2.948303222656250000e-01 0.000000000000000000e+00 0.000000000000000000e+00 2.496429931640625000e+03 1.078829526901245117e+00 3.000000000000000000e+00 2.791193847656250000e+02 -9.925000000000000000e+01 5.225000000000000000e+01
4.200000000000000000e+01 4.903923076923074973e+02 1.195291900634765625e+02 -3.572387695312500000e-01 0.000000000000000000e+00 0.000000000000000000e+00 2.496987792968750000e+03 8.693931698799133301e-01 3.000000000000000000e+00 2.435746307373046875e+02 -9.875000000000000000e+01 5.225000000000000000e+01
3.700000000000000000e+01 6.434230769230773603e+02 1.042174148559570312e+02 -1.138519287109375000e+00 0.000000000000000000e+00 5.882352963089942932e-02 2.386224609375000000e+03 8.515228629112243652e-01 3.000000000000000000e+00 2.693585815429687500e+02 -9.625000000000000000e+01 5.225000000000000000e+01
3.100000000000000000e+01 6.444384615384616382e+02 1.223483123779296875e+02 -1.388610839843750000e+00 0.000000000000000000e+00 2.352941185235977173e-01 2.341361572265625000e+03 8.543316125869750977e-01 3.000000000000000000e+00 3.071921386718750000e+02 -9.575000000000000000e+01 5.225000000000000000e+01
2.600000000000000000e+01 6.496692307692303530e+02 1.619704132080078125e+02 -1.576721191406250000e+00 9.999999776482582092e-03 4.117647111415863037e-01 2.305644775390625000e+03 2.042025566101074219e+00 3.000000000000000000e+00 3.244425659179687500e+02 -9.525000000000000000e+01 5.225000000000000000e+01
4.600000000000000000e+01 6.734923076923073495e+02 2.296433868408203125e+02 -1.911590576171875000e+00 9.999999776482582092e-03 4.705882370471954346e-01 2.240308593750000000e+03 8.594893813133239746e-01 4.000000000000000000e+00 3.464235229492187500e+02 -9.425000000000000000e+01 5.225000000000000000e+01
2.900000000000000000e+01 7.246538461538464162e+02 2.400557861328125000e+02 -2.188690185546875000e+00 9.999999776482582092e-03 0.000000000000000000e+00 2.178973144531250000e+03 1.374262332916259766e+00 3.000000000000000000e+00 3.738237304687500000e+02 -9.325000000000000000e+01 5.225000000000000000e+01
6.000000000000000000e+01 7.515846153846152902e+02 2.513798217773437500e+02 -2.407958984375000000e+00 9.999999776482582092e-03 5.882352963089942932e-02 2.121638427734375000e+03 1.211502313613891602e+00 4.000000000000000000e+00 3.921123962402343750e+02 -9.225000000000000000e+01 5.225000000000000000e+01
5.500000000000000000e+01 7.732307692307693969e+02 2.643965454101562500e+02 -2.515747070312500000e+00 1.086587756872177124e-01 8.823529481887817383e-01 2.094722900390625000e+03 1.244888782501220703e+00 4.000000000000000000e+00 4.108261413574218750e+02 -9.175000000000000000e+01 5.225000000000000000e+01
6.200000000000000000e+01 7.873615384615386574e+02 2.702615356445312500e+02 -2.617980957031250000e+00 1.127694249153137207e-01 0.000000000000000000e+00 2.073062744140625000e+03 1.969556212425231934e+00 4.000000000000000000e+00 3.906453247070312500e+02 -9.125000000000000000e+01 5.225000000000000000e+01
3.600000000000000000e+01 7.957692307692306031e+02 2.744040527343750000e+02 -2.822448730468750000e+00 9.999999776482582092e-03 5.882353186607360840e-01 2.029742187500000000e+03 1.974117875099182129e+00 3.000000000000000000e+00 3.350610351562500000e+02 -9.025000000000000000e+01 5.225000000000000000e+01
5.300000000000000000e+01 7.681999999999997044e+02 2.773247375488281250e+02 -3.055999755859375000e+00 1.096836999058723450e-01 5.882353186607360840e-01 1.989874145507812500e+03 1.939920067787170410e+00 4.000000000000000000e+00 2.918075866699218750e+02 -8.925000000000000000e+01 5.225000000000000000e+01
5.700000000000000000e+01 7.455769230769230944e+02 2.762142639160156250e+02 -3.177612304687500000e+00 1.181697025895118713e-01 0.000000000000000000e+00 1.970515380859375000e+03 1.535601615905761719e+00 4.000000000000000000e+00 2.621456604003906250e+02 -8.875000000000000000e+01 5.225000000000000000e+01
6.300000000000000000e+01 7.279769230769236401e+02 2.770460510253906250e+02 -3.299255371093750000e+00 1.233230829238891602e-01 2.941176593303680420e-01 1.951156738281250000e+03 1.933636188507080078e+00 4.000000000000000000e+00 2.520926513671875000e+02 -8.825000000000000000e+01 5.225000000000000000e+01
4.600000000000000000e+01 7.101999999999999318e+02 2.776895751953125000e+02 -3.378906250000000000e+00 1.375659108161926270e-01 0.000000000000000000e+00 1.938261718750000000e+03 1.917183756828308105e+00 4.000000000000000000e+00 2.606851196289062500e+02 -8.775000000000000000e+01 5.225000000000000000e+01
1.300000000000000000e+01 6.844538461538460297e+02 2.792373657226562500e+02 -3.510284423828125000e+00 1.201531291007995605e-01 0.000000000000000000e+00 1.916780761718750000e+03 1.932011604309082031e+00 3.000000000000000000e+00 2.086236114501953125e+02 -8.675000000000000000e+01 5.225000000000000000e+01
1.700000000000000000e+01 6.656153846153843006e+02 2.798366699218750000e+02 -3.575958251953125000e+00 1.201978400349617004e-01 0.000000000000000000e+00 1.906040405273437500e+03 1.930486559867858887e+00 3.000000000000000000e+00 1.837758636474609375e+02 -8.625000000000000000e+01 5.225000000000000000e+01
5.900000000000000000e+01 6.372076923076923549e+02 2.920209045410156250e+02 -3.369140625000000000e+00 1.367470026016235352e-01 5.294117927551269531e-01 1.918243041992187500e+03 1.894285559654235840e+00 4.000000000000000000e+00 1.554116058349609375e+02 -8.475000000000000000e+01 5.225000000000000000e+01
3.200000000000000000e+01 6.221538461538460751e+02 3.115459289550781250e+02 -3.267242431640625000e+00 1.257717162370681763e-01 2.941176593303680420e-01 1.924666748046875000e+03 1.888614773750305176e+00 3.000000000000000000e+00 1.271269683837890625e+02 -8.425000000000000000e+01 5.225000000000000000e+01
6.000000000000000000e+00 6.172846153846153356e+02 3.352937927246093750e+02 -3.066467285156250000e+00 1.201985552906990051e-01 0.000000000000000000e+00 1.938158569335937500e+03 1.878993988037109375e+00 1.000000000000000000e+00 8.603842926025390625e+01 -8.375000000000000000e+01 5.225000000000000000e+01
3.800000000000000000e+01 6.066615384615383846e+02 3.386948547363281250e+02 -2.865692138671875000e+00 1.173500120639801025e-01 0.000000000000000000e+00 1.951650390625000000e+03 1.869069933891296387e+00 3.000000000000000000e+00 5.864216995239257812e+01 -8.325000000000000000e+01 5.225000000000000000e+01
2.800000000000000000e+01 5.934076923076922867e+02 3.376535644531250000e+02 -2.664916992187500000e+00 1.144655197858810425e-01 0.000000000000000000e+00 1.965142211914062500e+03 1.866454124450683594e+00 3.000000000000000000e+00 4.468138504028320312e+01 -8.275000000000000000e+01 5.225000000000000000e+01
2.400000000000000000e+01 5.785538461538461661e+02 3.369729614257812500e+02 -2.773864746093750000e+00 1.125414073467254639e-01 0.000000000000000000e+00 1.864672119140625000e+03 1.865608692169189453e+00 3.000000000000000000e+00 3.834385681152343750e+01 -8.225000000000000000e+01 5.225000000000000000e+01
1.400000000000000000e+01 6.888846153846154721e+02 3.673020019531250000e+02 -2.598663330078125000e+00 1.186616718769073486e-01 0.000000000000000000e+00 1.906228149414062500e+03 7.376835942268371582e-01 3.000000000000000000e+00 2.981931495666503906e+01 -7.825000000000000000e+01 5.225000000000000000e+01
5.200000000000000000e+01 7.152307692307695106e+02 3.755381469726562500e+02 -2.871612548828125000e+00 1.451748162508010864e-01 4.117647111415863037e-01 1.860370117187500000e+03 7.304226160049438477e-01 4.000000000000000000e+00 1.307817840576171875e+02 -7.775000000000000000e+01 5.225000000000000000e+01
3.500000000000000000e+01 7.376076923076921048e+02 3.829247131347656250e+02 -3.144561767578125000e+00 1.770375072956085205e-01 2.941176593303680420e-01 1.814512084960937500e+03 7.210268974304199219e-01 3.000000000000000000e+00 1.767404937744140625e+02 -7.725000000000000000e+01 5.225000000000000000e+01
1.900000000000000000e+01 7.715999999999996817e+02 3.868736877441406250e+02 -3.415435791015625000e+00 2.117312997579574585e-01 5.882353186607360840e-01 1.769912597656250000e+03 7.099088430404663086e-01 3.000000000000000000e+00 2.339751586914062500e+02 -7.675000000000000000e+01 5.225000000000000000e+01
5.100000000000000000e+01 7.862692307692307168e+02 3.892125549316406250e+02 -3.680145263671875000e+00 1.849405467510223389e-01 2.941176593303680420e-01 1.729088745117187500e+03 7.064110040664672852e-01 4.000000000000000000e+00 2.368056945800781250e+02 -7.625000000000000000e+01 5.225000000000000000e+01
4.400000000000000000e+01 7.900384615384616609e+02 3.962476501464843750e+02 -3.944824218750000000e+00 1.907654553651809692e-01 9.411764740943908691e-01 1.688264892578125000e+03 9.010095596313476562e-01 3.000000000000000000e+00 2.749458007812500000e+02 -7.575000000000000000e+01 5.225000000000000000e+01
4.500000000000000000e+01 7.955692307692307850e+02 4.055935974121093750e+02 -4.209503173828125000e+00 2.120041847229003906e-01 6.470588445663452148e-01 1.647441040039062500e+03 7.306227684020996094e-01 4.000000000000000000e+00 2.878169555664062500e+02 -7.525000000000000000e+01 5.225000000000000000e+01
3.100000000000000000e+01 8.713153846153846871e+02 4.032855834960937500e+02 -4.615051269531250000e+00 2.757488489151000977e-01 7.058823704719543457e-01 1.559695068359375000e+03 1.511428356170654297e+00 3.000000000000000000e+00 3.833216552734375000e+02 -7.375000000000000000e+01 5.225000000000000000e+01
2.300000000000000000e+01 8.922538461538465526e+02 4.010682983398437500e+02 -4.716033935546875000e+00 3.130624592304229736e-01 5.882353186607360840e-01 1.513739501953125000e+03 6.618939042091369629e-01 3.000000000000000000e+00 4.525880737304687500e+02 -7.275000000000000000e+01 5.225000000000000000e+01
2.400000000000000000e+01 9.471076923076924459e+02 4.028698730468750000e+02 -4.668487548828125000e+00 4.119878113269805908e-01 6.470588445663452148e-01 1.497354736328125000e+03 6.883936524391174316e-01 3.000000000000000000e+00 5.373118896484375000e+02 -7.225000000000000000e+01 5.225000000000000000e+01
5.300000000000000000e+01 9.793999999999997499e+02 4.044702148437500000e+02 -4.620941162109375000e+00 5.262298583984375000e-01 8.235294222831726074e-01 1.480970092773437500e+03 8.974688649177551270e-01 4.000000000000000000e+00 6.140061645507812500e+02 -7.175000000000000000e+01 5.225000000000000000e+01
1.300000000000000000e+01 9.609923076923075769e+02 4.060129699707031250e+02 -4.573394775390625000e+00 4.324540495872497559e-01 2.941176593303680420e-01 1.464585449218750000e+03 1.023501276969909668e+00 3.000000000000000000e+00 6.834646606445312500e+02 -7.125000000000000000e+01 5.225000000000000000e+01
3.400000000000000000e+01 9.935230769230765873e+02 4.113898620605468750e+02 -4.536773681640625000e+00 6.456978321075439453e-01 2.941176593303680420e-01 1.455945312500000000e+03 1.219814896583557129e+00 3.000000000000000000e+00 8.649734497070312500e+02 -7.075000000000000000e+01 5.225000000000000000e+01
2.900000000000000000e+01 9.855538461538459387e+02 4.416241149902343750e+02 -4.449218750000000000e+00 3.652600944042205811e-01 5.882353186607360840e-01 1.430436279296875000e+03 1.613513588905334473e+00 3.000000000000000000e+00 6.627029418945312500e+02 -6.925000000000000000e+01 5.225000000000000000e+01
5.200000000000000000e+01 9.791769230769234582e+02 4.828850097656250000e+02 -4.657836914062500000e+00 3.442216813564300537e-01 2.941176593303680420e-01 1.405895629882812500e+03 1.223823308944702148e+00 4.000000000000000000e+00 6.593026123046875000e+02 -6.725000000000000000e+01 5.225000000000000000e+01
5.100000000000000000e+01 8.969230769230767919e+02 4.839289550781250000e+02 -4.706604003906250000e+00 3.013567030429840088e-01 2.941176593303680420e-01 1.405776855468750000e+03 1.563863754272460938e+00 4.000000000000000000e+00 5.849812011718750000e+02 -6.675000000000000000e+01 5.225000000000000000e+01
1.600000000000000000e+01 7.997538461538459842e+02 4.796292724609375000e+02 -4.804168701171875000e+00 3.348051607608795166e-01 0.000000000000000000e+00 1.405539184570312500e+03 1.608154773712158203e+00 3.000000000000000000e+00 5.894629516601562500e+02 -6.575000000000000000e+01 5.225000000000000000e+01
4.600000000000000000e+01 8.382000000000001592e+02 4.594784851074218750e+02 -4.767791748046875000e+00 4.173228740692138672e-01 0.000000000000000000e+00 1.412469238281250000e+03 1.590043902397155762e+00 4.000000000000000000e+00 6.789588623046875000e+02 -6.525000000000000000e+01 5.225000000000000000e+01
4.100000000000000000e+01 8.858615384615382027e+02 4.234013977050781250e+02 -4.703063964843750000e+00 3.099287748336791992e-01 0.000000000000000000e+00 1.421748901367187500e+03 1.583799481391906738e+00 3.000000000000000000e+00 5.970218505859375000e+02 -6.475000000000000000e+01 5.225000000000000000e+01
2.300000000000000000e+01 9.039692307692309896e+02 3.955249938964843750e+02 -4.638336181640625000e+00 2.994574606418609619e-01 0.000000000000000000e+00 1.431028686523437500e+03 1.595801115036010742e+00 3.000000000000000000e+00 5.318776245117187500e+02 -6.425000000000000000e+01 5.225000000000000000e+01
4.700000000000000000e+01 9.292999999999994998e+02 3.921983642578125000e+02 -4.573608398437500000e+00 2.160229980945587158e-01 2.352941185235977173e-01 1.440308349609375000e+03 1.604052305221557617e+00 4.000000000000000000e+00 4.947520446777343750e+02 -6.375000000000000000e+01 5.225000000000000000e+01
4.000000000000000000e+01 9.503230769230772239e+02 3.907983093261718750e+02 -4.349700927734375000e+00 2.505666613578796387e-01 0.000000000000000000e+00 1.455065673828125000e+03 1.460273742675781250e+00 3.000000000000000000e+00 5.462098388671875000e+02 -6.325000000000000000e+01 5.225000000000000000e+01
4.700000000000000000e+01 9.822999999999999545e+02 3.935346374511718750e+02 -4.125793457031250000e+00 2.445173114538192749e-01 0.000000000000000000e+00 1.469822998046875000e+03 1.550946116447448730e+00 4.000000000000000000e+00 5.274482421875000000e+02 -6.275000000000000000e+01 5.225000000000000000e+01
6.800000000000000000e+01 1.022969230769230990e+03 4.330146484375000000e+02 -3.640930175781250000e+00 1.899333000183105469e-01 0.000000000000000000e+00 1.498712524414062500e+03 1.623823642730712891e+00 4.000000000000000000e+00 4.749559326171875000e+02 -6.175000000000000000e+01 5.225000000000000000e+01
6.800000000000000000e+01 1.048123076923076724e+03 4.568274536132812500e+02 -3.268737792968750000e+00 1.776243299245834351e-01 0.000000000000000000e+00 1.510969726562500000e+03 1.626996517181396484e+00 4.000000000000000000e+00 4.361133728027343750e+02 -6.125000000000000000e+01 5.225000000000000000e+01
6.900000000000000000e+01 1.067169230769231717e+03 4.853880615234375000e+02 -2.896545410156250000e+00 1.389860808849334717e-01 2.352941185235977173e-01 1.523227050781250000e+03 1.629170417785644531e+00 4.000000000000000000e+00 3.710461730957031250e+02 -6.075000000000000000e+01 5.225000000000000000e+01
6.700000000000000000e+01 1.117169230769230353e+03 5.130500488281250000e+02 -2.177520751953125000e+00 1.532130539417266846e-01 2.941176593303680420e-01 1.544548950195312500e+03 1.592378735542297363e+00 4.000000000000000000e+00 4.391159057617187500e+02 -5.975000000000000000e+01 5.225000000000000000e+01
1.300000000000000000e+01 1.136723076923076405e+03 5.299232788085937500e+02 -1.855987548828125000e+00 1.430359482765197754e-01 0.000000000000000000e+00 1.550421142578125000e+03 9.485390186309814453e-01 3.000000000000000000e+00 4.383841857910156250e+02 -5.925000000000000000e+01 5.225000000000000000e+01
4.500000000000000000e+01 1.167907692307692741e+03 5.509283447265625000e+02 -1.534454345703125000e+00 1.641822308301925659e-01 0.000000000000000000e+00 1.556293457031250000e+03 9.134303331375122070e-01 4.000000000000000000e+00 5.152407226562500000e+02 -5.875000000000000000e+01 5.225000000000000000e+01
6.100000000000000000e+01 1.172469230769231444e+03 5.574579467773437500e+02 -1.212951660156250000e+00 9.999999776482582092e-03 0.000000000000000000e+00 1.562165649414062500e+03 1.375530242919921875e+00 4.000000000000000000e+00 3.617422485351562500e+02 -5.825000000000000000e+01 5.225000000000000000e+01
5.100000000000000000e+01 1.195646153846153993e+03 5.082822570800781250e+02 -3.425598144531250000e-01 9.999999776482582092e-03 0.000000000000000000e+00 1.553686279296875000e+03 6.005246043205261230e-01 4.000000000000000000e+00 3.579460144042968750e+02 -5.675000000000000000e+01 5.225000000000000000e+01
3.000000000000000000e+01 1.181707692307692014e+03 4.479214782714843750e+02 -5.526733398437500000e-02 9.999999776482582092e-03 0.000000000000000000e+00 1.550068969726562500e+03 6.034866571426391602e-01 3.000000000000000000e+00 2.046462249755859375e+02 -5.625000000000000000e+01 5.225000000000000000e+01
1.000000000000000000e+00 2.543499999999999545e+03 6.402989501953125000e+02 1.898345947265625000e+00 0.000000000000000000e+00 0.000000000000000000e+00 1.452907104492187500e+03 1.417439818382263184e+00 1.000000000000000000e+00 8.456716308593750000e+02 -1.277500000000000000e+02 5.275000000000000000e+01
4.000000000000000000e+00 1.577992307692307577e+03 3.419484252929687500e+02 7.959289550781250000e-01 1.079351082444190979e-01 0.000000000000000000e+00 1.335023559570312500e+03 1.619327187538146973e+00 1.000000000000000000e+00 1.141264892578125000e+03 -1.267500000000000000e+02 5.275000000000000000e+01
7.200000000000000000e+01 1.165284615384615336e+03 2.891770019531250000e+02 4.501953125000000000e-01 0.000000000000000000e+00 8.823529481887817383e-01 1.350959350585937500e+03 1.627217292785644531e+00 4.000000000000000000e+00 8.452434692382812500e+02 -1.262500000000000000e+02 5.275000000000000000e+01
5.600000000000000000e+01 8.792384615384610242e+02 2.751862487792968750e+02 1.044616699218750000e-01 2.639084160327911377e-01 2.941176593303680420e-01 1.366895141601562500e+03 1.640986442565917969e+00 4.000000000000000000e+00 1.823990844726562500e+03 -1.257500000000000000e+02 5.275000000000000000e+01
1.300000000000000000e+01 7.041923076923077360e+02 2.073384246826171875e+02 -2.536315917968750000e-01 4.544714689254760742e-01 2.941176593303680420e-01 1.359378662109375000e+03 1.647232174873352051e+00 3.000000000000000000e+00 1.847818115234375000e+03 -1.252500000000000000e+02 5.275000000000000000e+01
3.700000000000000000e+01 5.886461538461541068e+02 1.449727935791015625e+02 -6.158447265625000000e-01 9.999999776482582092e-03 4.705882370471954346e-01 1.344044677734375000e+03 1.649510145187377930e+00 3.000000000000000000e+00 1.656206787109375000e+03 -1.247500000000000000e+02 5.275000000000000000e+01
5.700000000000000000e+01 4.908769230769230489e+02 1.647587280273437500e+02 -9.780883789062500000e-01 9.999999776482582092e-03 0.000000000000000000e+00 1.328710693359375000e+03 1.705463767051696777e+00 4.000000000000000000e+00 1.469044433593750000e+03 -1.242500000000000000e+02 5.275000000000000000e+01
4.800000000000000000e+01 4.454538461538463139e+02 2.045993194580078125e+02 -1.340301513671875000e+00 9.999999776482582092e-03 2.941176593303680420e-01 1.313376708984375000e+03 1.775629997253417969e+00 4.000000000000000000e+00 1.314285156250000000e+03 -1.237500000000000000e+02 5.275000000000000000e+01
3.000000000000000000e+01 4.590615384615385324e+02 2.406132507324218750e+02 -1.561523437500000000e+00 0.000000000000000000e+00 2.941176593303680420e-01 1.294129638671875000e+03 1.848097562789916992e+00 3.000000000000000000e+00 1.315183227539062500e+03 -1.232500000000000000e+02 5.275000000000000000e+01
6.500000000000000000e+01 5.060769230769229239e+02 2.538084869384765625e+02 -1.782745361328125000e+00 0.000000000000000000e+00 0.000000000000000000e+00 1.274882446289062500e+03 1.929462194442749023e+00 4.000000000000000000e+00 1.206238769531250000e+03 -1.227500000000000000e+02 5.275000000000000000e+01
1.700000000000000000e+01 5.809461538461536065e+02 2.622173461914062500e+02 -2.003997802734375000e+00 0.000000000000000000e+00 2.352941185235977173e-01 1.255635375976562500e+03 1.983638644218444824e+00 3.000000000000000000e+00 1.000040405273437500e+03 -1.222500000000000000e+02 5.275000000000000000e+01
4.400000000000000000e+01 7.829384615384616382e+02 2.797578735351562500e+02 -2.260192871093750000e+00 0.000000000000000000e+00 0.000000000000000000e+00 1.220533203125000000e+03 1.897423148155212402e+00 3.000000000000000000e+00 1.178834106445312500e+03 -1.217500000000000000e+02 5.275000000000000000e+01
6.200000000000000000e+01 9.139307692307691013e+02 2.938366699218750000e+02 -2.621246337890625000e+00 0.000000000000000000e+00 2.941176593303680420e-01 1.137865844726562500e+03 9.747611284255981445e-01 4.000000000000000000e+00 1.707042846679687500e+03 -1.212500000000000000e+02 5.275000000000000000e+01
5.300000000000000000e+01 9.231384615384613426e+02 3.144640502929687500e+02 -2.982330322265625000e+00 9.999999776482582092e-03 0.000000000000000000e+00 1.055198486328125000e+03 1.204934477806091309e+00 4.000000000000000000e+00 1.368506469726562500e+03 -1.207500000000000000e+02 5.275000000000000000e+01
6.000000000000000000e+00 9.869538461538460297e+02 3.401090087890625000e+02 -3.343383789062500000e+00 4.325776398181915283e-01 5.882353186607360840e-01 9.725311279296875000e+02 9.401230216026306152e-01 1.000000000000000000e+00 1.966505126953125000e+03 -1.202500000000000000e+02 5.275000000000000000e+01
5.400000000000000000e+01 9.267230769230765191e+02 3.362967834472656250e+02 -3.539367675781250000e+00 0.000000000000000000e+00 0.000000000000000000e+00 9.605688476562500000e+02 1.238379478454589844e+00 4.000000000000000000e+00 8.721864013671875000e+02 -1.192500000000000000e+02 5.275000000000000000e+01
4.400000000000000000e+01 7.018538461538462343e+02 2.771838684082031250e+02 -2.548217773437500000e+00 9.999999776482582092e-03 0.000000000000000000e+00 1.322005737304687500e+03 1.509956121444702148e+00 3.000000000000000000e+00 1.680677368164062500e+03 -1.167500000000000000e+02 5.275000000000000000e+01
5.900000000000000000e+01 5.884076923076924004e+02 2.700622558593750000e+02 -2.179382324218750000e+00 0.000000000000000000e+00 2.941176593303680420e-01 1.437416503906250000e+03 1.712050199508666992e+00 4.000000000000000000e+00 1.292322387695312500e+03 -1.162500000000000000e+02 5.275000000000000000e+01
4.400000000000000000e+01 5.609384615384614108e+02 2.608846130371093750e+02 -1.851135253906250000e+00 0.000000000000000000e+00 0.000000000000000000e+00 1.533966064453125000e+03 1.829939484596252441e+00 3.000000000000000000e+00 1.089926147460937500e+03 -1.157500000000000000e+02 5.275000000000000000e+01
4.700000000000000000e+01 5.578461538461538112e+02 2.526489868164062500e+02 -1.522888183593750000e+00 0.000000000000000000e+00 0.000000000000000000e+00 1.630515502929687500e+03 1.069349765777587891e+00 4.000000000000000000e+00 1.007056457519531250e+03 -1.152500000000000000e+02 5.275000000000000000e+01
4.700000000000000000e+01 5.777076923076922412e+02 2.419716339111328125e+02 -1.194641113281250000e+00 0.000000000000000000e+00 0.000000000000000000e+00 1.727064941406250000e+03 1.843437314033508301e+00 4.000000000000000000e+00 9.987631835937500000e+02 -1.147500000000000000e+02 5.275000000000000000e+01
3.000000000000000000e+00 4.679615384615383959e+02 1.910127410888671875e+02 -9.927368164062500000e-02 0.000000000000000000e+00 8.823529481887817383e-01 2.044703735351562500e+03 3.247699499130249023e+00 1.000000000000000000e+00 7.743010864257812500e+02 -1.132500000000000000e+02 5.275000000000000000e+01
3.000000000000000000e+00 4.835384615384614904e+02 2.045012817382812500e+02 -1.256561279296875000e+00 0.000000000000000000e+00 8.235294222831726074e-01 2.346953125000000000e+03 3.136277198791503906e+00 1.000000000000000000e+00 4.560611267089843750e+02 -1.032500000000000000e+02 5.275000000000000000e+01
4.900000000000000000e+01 4.816615384615383277e+02 2.288598785400390625e+02 -1.175292968750000000e+00 0.000000000000000000e+00 1.117647051811218262e+00 2.359574218750000000e+03 8.282575607299804688e-01 4.000000000000000000e+00 4.214620361328125000e+02 -1.027500000000000000e+02 5.275000000000000000e+01
4.900000000000000000e+01 5.077461538461538453e+02 2.247726287841796875e+02 -9.576416015625000000e-01 0.000000000000000000e+00 5.882352963089942932e-02 2.391044189453125000e+03 8.827311992645263672e-01 4.000000000000000000e+00 4.008840332031250000e+02 -1.017500000000000000e+02 5.275000000000000000e+01
5.400000000000000000e+01 5.243461538461535838e+02 1.886646881103515625e+02 -8.488159179687500000e-01 9.999999776482582092e-03 5.882353186607360840e-01 2.406779296875000000e+03 1.141593933105468750e+00 4.000000000000000000e+00 5.085118713378906250e+02 -1.012500000000000000e+02 5.275000000000000000e+01
3.600000000000000000e+01 5.024461538461538339e+02 1.520909576416015625e+02 -7.103271484375000000e-01 0.000000000000000000e+00 0.000000000000000000e+00 2.429514892578125000e+03 8.722255825996398926e-01 3.000000000000000000e+00 2.605032653808593750e+02 -9.925000000000000000e+01 5.275000000000000000e+01
6.200000000000000000e+01 6.298230769230769965e+02 1.225549392700195312e+02 -1.649658203125000000e+00 0.000000000000000000e+00 5.882353186607360840e-01 2.312769531250000000e+03 8.392591476440429688e-01 4.000000000000000000e+00 2.684009094238281250e+02 -9.625000000000000000e+01 5.275000000000000000e+01
6.800000000000000000e+01 6.358230769230769965e+02 1.531148223876953125e+02 -1.899169921875000000e+00 9.999999776482582092e-03 8.823529481887817383e-01 2.271010498046875000e+03 8.420237898826599121e-01 4.000000000000000000e+00 2.983446960449218750e+02 -9.575000000000000000e+01 5.275000000000000000e+01
3.500000000000000000e+01 6.674153846153848235e+02 2.610229187011718750e+02 -2.381195068359375000e+00 9.999999776482582092e-03 7.647058963775634766e-01 2.174449707031250000e+03 8.358255624771118164e-01 3.000000000000000000e+00 3.272039184570312500e+02 -9.425000000000000000e+01 5.275000000000000000e+01
5.600000000000000000e+01 7.119846153846153811e+02 2.704045104980468750e+02 -2.626342773437500000e+00 9.999999776482582092e-03 3.529411852359771729e-01 2.116957031250000000e+03 8.346176743507385254e-01 4.000000000000000000e+00 3.143724365234375000e+02 -9.325000000000000000e+01 5.275000000000000000e+01
6.700000000000000000e+01 7.149615384615384528e+02 2.663558349609375000e+02 -2.718872070312500000e+00 9.999999776482582092e-03 5.882353186607360840e-01 2.090781005859375000e+03 1.008666872978210449e+00 4.000000000000000000e+00 3.087387084960937500e+02 -9.275000000000000000e+01 5.275000000000000000e+01
2.000000000000000000e+01 7.309846153846153811e+02 2.616279296875000000e+02 -2.811401367187500000e+00 9.999999776482582092e-03 0.000000000000000000e+00 2.064604980468750000e+03 1.490094661712646484e+00 3.000000000000000000e+00 3.155201416015625000e+02 -9.225000000000000000e+01 5.275000000000000000e+01
6.500000000000000000e+01 7.452076923076917865e+02 2.687752075195312500e+02 -2.904876708984375000e+00 1.195028722286224365e-01 0.000000000000000000e+00 2.039539428710937500e+03 1.956904649734497070e+00 4.000000000000000000e+00 3.172637023925781250e+02 -9.175000000000000000e+01 5.275000000000000000e+01
5.300000000000000000e+01 7.573538461538458932e+02 2.642536315917968750e+02 -3.001190185546875000e+00 1.373559385538101196e-01 4.117647111415863037e-01 2.017805419921875000e+03 1.940058231353759766e+00 4.000000000000000000e+00 3.313486938476562500e+02 -9.125000000000000000e+01 5.275000000000000000e+01
2.900000000000000000e+01 7.513923076923074404e+02 2.671164855957031250e+02 -3.193847656250000000e+00 1.362945884466171265e-01 0.000000000000000000e+00 1.974337524414062500e+03 1.941096425056457520e+00 3.000000000000000000e+00 3.020862731933593750e+02 -9.025000000000000000e+01 5.275000000000000000e+01
3.900000000000000000e+01 7.460461538461538566e+02 2.653229675292968750e+02 -3.304443359375000000e+00 1.437240839004516602e-01 2.352941185235977173e-01 1.952621459960937500e+03 1.927894949913024902e+00 3.000000000000000000e+00 2.833059082031250000e+02 -8.975000000000000000e+01 5.275000000000000000e+01
6.500000000000000000e+01 7.372538461538462116e+02 2.622814941406250000e+02 -3.429290771484375000e+00 1.475285291671752930e-01 5.882352963089942932e-02 1.930923339843750000e+03 1.918569684028625488e+00 4.000000000000000000e+00 2.723562316894531250e+02 -8.925000000000000000e+01 5.275000000000000000e+01
5.300000000000000000e+01 7.107923076923078725e+02 2.684473266601562500e+02 -3.679016113281250000e+00 1.732140183448791504e-01 1.176470592617988586e-01 1.887526977539062500e+03 1.906288862228393555e+00 4.000000000000000000e+00 2.437927093505859375e+02 -8.825000000000000000e+01 5.275000000000000000e+01
3.100000000000000000e+01 6.900692307692310123e+02 2.763525695800781250e+02 -3.826354980468750000e+00 1.890784502029418945e-01 0.000000000000000000e+00 1.858174438476562500e+03 1.883088350296020508e+00 3.000000000000000000e+00 2.004393463134765625e+02 -8.725000000000000000e+01 5.275000000000000000e+01
4.000000000000000000e+01 6.649000000000000909e+02 2.776918640136718750e+02 -3.892700195312500000e+00 1.576946079730987549e-01 0.000000000000000000e+00 1.844501220703125000e+03 1.903575420379638672e+00 3.000000000000000000e+00 1.848229827880859375e+02 -8.675000000000000000e+01 5.275000000000000000e+01
6.000000000000000000e+01 6.536769230769225487e+02 2.768323669433593750e+02 -3.959075927734375000e+00 1.661595106124877930e-01 0.000000000000000000e+00 1.830828125000000000e+03 1.899810552597045898e+00 4.000000000000000000e+00 1.685070953369140625e+02 -8.625000000000000000e+01 5.275000000000000000e+01
2.800000000000000000e+01 6.450846153846152902e+02 2.736302185058593750e+02 -3.885375976562500000e+00 1.711216270923614502e-01 0.000000000000000000e+00 1.832346191406250000e+03 1.881765961647033691e+00 3.000000000000000000e+00 1.574799804687500000e+02 -8.575000000000000000e+01 5.275000000000000000e+01
3.100000000000000000e+01 6.332692307692306031e+02 2.720780639648437500e+02 -3.811676025390625000e+00 1.738470494747161865e-01 2.352941185235977173e-01 1.833864257812500000e+03 1.867064237594604492e+00 3.000000000000000000e+00 1.412233734130859375e+02 -8.525000000000000000e+01 5.275000000000000000e+01
4.000000000000000000e+01 6.230538461538460524e+02 2.747363281250000000e+02 -3.737976074218750000e+00 1.877507418394088745e-01 0.000000000000000000e+00 1.835382324218750000e+03 1.857537746429443359e+00 3.000000000000000000e+00 1.446756896972656250e+02 -8.475000000000000000e+01 5.275000000000000000e+01
3.000000000000000000e+01 6.053461538461538112e+02 2.846905212402343750e+02 -3.632995605468750000e+00 1.601949185132980347e-01 5.882353186607360840e-01 1.839464355468750000e+03 1.853041768074035645e+00 3.000000000000000000e+00 9.759201049804687500e+01 -8.425000000000000000e+01 5.275000000000000000e+01
3.200000000000000000e+01 5.986923076923076223e+02 3.064707946777343750e+02 -3.434051513671875000e+00 1.628028005361557007e-01 0.000000000000000000e+00 1.851237792968750000e+03 1.842801570892333984e+00 3.000000000000000000e+00 7.985486602783203125e+01 -8.375000000000000000e+01 5.275000000000000000e+01
1.200000000000000000e+01 5.899307692307691013e+02 3.188478698730468750e+02 -3.235107421875000000e+00 1.553585827350616455e-01 3.529411852359771729e-01 1.863011230468750000e+03 1.831408619880676270e+00 3.000000000000000000e+00 4.284396362304687500e+01 -8.325000000000000000e+01 5.275000000000000000e+01
5.500000000000000000e+01 5.779461538461537202e+02 3.236518859863281250e+02 -3.036193847656250000e+00 1.503096073865890503e-01 0.000000000000000000e+00 1.874784667968750000e+03 1.828247189521789551e+00 4.000000000000000000e+00 2.268241500854492188e+01 -8.275000000000000000e+01 5.275000000000000000e+01
1.100000000000000000e+01 6.781000000000002501e+02 3.767337036132812500e+02 -2.935882568359375000e+00 1.489255726337432861e-01 0.000000000000000000e+00 1.825751098632812500e+03 7.258946299552917480e-01 3.000000000000000000e+00 6.026620483398437500e+01 -7.825000000000000000e+01 5.275000000000000000e+01
1.700000000000000000e+01 7.046846153846153129e+02 3.823118286132812500e+02 -3.202636718750000000e+00 1.888113319873809814e-01 0.000000000000000000e+00 1.783880981445312500e+03 7.170402407646179199e-01 3.000000000000000000e+00 1.279920120239257812e+02 -7.775000000000000000e+01 5.275000000000000000e+01
3.900000000000000000e+01 7.264153846153844825e+02 3.857262573242187500e+02 -3.469360351562500000e+00 2.114136964082717896e-01 0.000000000000000000e+00 1.742010864257812500e+03 7.084628939628601074e-01 3.000000000000000000e+00 1.912310638427734375e+02 -7.725000000000000000e+01 5.275000000000000000e+01
2.500000000000000000e+01 7.725846153846152902e+02 3.859028320312500000e+02 -3.992401123046875000e+00 2.342623770236968994e-01 0.000000000000000000e+00 1.663889160156250000e+03 6.919341087341308594e-01 3.000000000000000000e+00 2.399043426513671875e+02 -7.625000000000000000e+01 5.275000000000000000e+01
2.900000000000000000e+01 7.795923076923075996e+02 3.816817626953125000e+02 -4.250793457031250000e+00 2.527895867824554443e-01 5.882353186607360840e-01 1.626513793945312500e+03 6.894083619117736816e-01 3.000000000000000000e+00 2.599295959472656250e+02 -7.575000000000000000e+01 5.275000000000000000e+01
2.000000000000000000e+01 7.870230769230770420e+02 3.809543151855468750e+02 -4.509155273437500000e+00 2.714009582996368408e-01 5.882353186607360840e-01 1.589138549804687500e+03 6.834262609481811523e-01 3.000000000000000000e+00 2.890841674804687500e+02 -7.525000000000000000e+01 5.275000000000000000e+01
4.100000000000000000e+01 8.292923076923077588e+02 3.821936035156250000e+02 -4.689697265625000000e+00 3.361473381519317627e-01 3.529411852359771729e-01 1.558064575195312500e+03 6.689332723617553711e-01 3.000000000000000000e+00 3.693159484863281250e+02 -7.475000000000000000e+01 5.275000000000000000e+01
5.100000000000000000e+01 8.382769230769222304e+02 3.863203735351562500e+02 -4.792388916015625000e+00 3.721698522567749023e-01 8.823529481887817383e-01 1.533292236328125000e+03 6.609249711036682129e-01 4.000000000000000000e+00 3.722649841308593750e+02 -7.425000000000000000e+01 5.275000000000000000e+01
5.400000000000000000e+01 8.487769230769233673e+02 3.889319458007812500e+02 -4.895080566406250000e+00 3.320329487323760986e-01 0.000000000000000000e+00 1.508519775390625000e+03 6.570490598678588867e-01 4.000000000000000000e+00 3.901697082519531250e+02 -7.375000000000000000e+01 5.275000000000000000e+01
1.700000000000000000e+01 8.575923076923079407e+02 3.925819702148437500e+02 -4.997772216796875000e+00 4.324283003807067871e-01 2.941176593303680420e-01 1.483747436523437500e+03 6.550968289375305176e-01 3.000000000000000000e+00 4.755109558105468750e+02 -7.325000000000000000e+01 5.275000000000000000e+01
1.600000000000000000e+01 8.710615384615377934e+02 3.954797363281250000e+02 -4.988983154296875000e+00 3.816587626934051514e-01 8.823529481887817383e-01 1.465323852539062500e+03 6.486997008323669434e-01 3.000000000000000000e+00 4.891681213378906250e+02 -7.275000000000000000e+01 5.275000000000000000e+01
2.400000000000000000e+01 8.935846153846157449e+02 3.993074951171875000e+02 -4.943054199218750000e+00 3.741276860237121582e-01 2.941176593303680420e-01 1.449016479492187500e+03 7.367696166038513184e-01 3.000000000000000000e+00 4.714584045410156250e+02 -7.225000000000000000e+01 5.275000000000000000e+01
4.000000000000000000e+01 9.501076923076926732e+02 4.025619506835937500e+02 -4.897094726562500000e+00 4.496317803859710693e-01 7.647058963775634766e-01 1.432709228515625000e+03 1.047899127006530762e+00 3.000000000000000000e+00 5.595378417968750000e+02 -7.175000000000000000e+01 5.275000000000000000e+01
2.500000000000000000e+01 9.308615384615384301e+02 4.047433471679687500e+02 -4.851165771484375000e+00 4.405549168586730957e-01 3.529411852359771729e-01 1.416401855468750000e+03 1.086697459220886230e+00 3.000000000000000000e+00 5.636305541992187500e+02 -7.125000000000000000e+01 5.275000000000000000e+01
7.000000000000000000e+00 9.495846153846155175e+02 4.395285949707031250e+02 -4.781890869140625000e+00 3.900029957294464111e-01 2.941176593303680420e-01 1.385485717773437500e+03 1.344387888908386230e+00 1.000000000000000000e+00 6.316572875976562500e+02 -6.975000000000000000e+01 5.275000000000000000e+01
3.100000000000000000e+01 9.548923076923078952e+02 4.550722656250000000e+02 -4.783691406250000000e+00 4.037780463695526123e-01 0.000000000000000000e+00 1.375436523437500000e+03 1.346886992454528809e+00 3.000000000000000000e+00 6.483457641601562500e+02 -6.925000000000000000e+01 5.275000000000000000e+01
1.600000000000000000e+01 9.683615384615385437e+02 4.682633361816406250e+02 -4.860168457031250000e+00 3.764705061912536621e-01 0.000000000000000000e+00 1.366156250000000000e+03 1.342240810394287109e+00 3.000000000000000000e+00 6.706712036132812500e+02 -6.875000000000000000e+01 5.275000000000000000e+01
1.600000000000000000e+01 9.649076923076922867e+02 4.768474426269531250e+02 -4.936614990234375000e+00 3.820409178733825684e-01 2.941176593303680420e-01 1.356875854492187500e+03 1.326101064682006836e+00 3.000000000000000000e+00 6.478508300781250000e+02 -6.825000000000000000e+01 5.275000000000000000e+01
3.800000000000000000e+01 9.553384615384610470e+02 4.794615173339843750e+02 -5.013061523437500000e+00 3.748289048671722412e-01 0.000000000000000000e+00 1.347595581054687500e+03 1.316919803619384766e+00 3.000000000000000000e+00 6.437436523437500000e+02 -6.775000000000000000e+01 5.275000000000000000e+01
2.600000000000000000e+01 9.176615384615381572e+02 4.800156250000000000e+02 -5.088928222656250000e+00 5.171590447425842285e-01 5.882352963089942932e-02 1.341975830078125000e+03 9.452934265136718750e-01 3.000000000000000000e+00 6.918314819335937500e+02 -6.725000000000000000e+01 5.275000000000000000e+01
1.200000000000000000e+01 8.828846153846159268e+02 4.801407165527343750e+02 -5.164154052734375000e+00 3.504050374031066895e-01 2.941176593303680420e-01 1.340016723632812500e+03 1.340147614479064941e+00 3.000000000000000000e+00 6.053684082031250000e+02 -6.675000000000000000e+01 5.275000000000000000e+01
3.900000000000000000e+01 9.557076923076923549e+02 3.646621704101562500e+02 -4.872497558593750000e+00 3.264421820640563965e-01 0.000000000000000000e+00 1.384717163085937500e+03 1.524299383163452148e+00 3.000000000000000000e+00 5.570805664062500000e+02 -6.325000000000000000e+01 5.275000000000000000e+01
6.300000000000000000e+01 9.801461538461541068e+02 4.455589599609375000e+02 -4.092376708984375000e+00 1.841091364622116089e-01 0.000000000000000000e+00 1.433473510742187500e+03 1.642592072486877441e+00 4.000000000000000000e+00 4.176113586425781250e+02 -6.175000000000000000e+01 5.275000000000000000e+01
5.300000000000000000e+01 1.051730769230769738e+03 5.005212402343750000e+02 -3.296936035156250000e+00 2.150969952344894409e-01 0.000000000000000000e+00 1.466199340820312500e+03 1.634405612945556641e+00 4.000000000000000000e+00 4.427646179199218750e+02 -6.075000000000000000e+01 5.275000000000000000e+01
7.200000000000000000e+01 1.055961538461538566e+03 5.103972167968750000e+02 -2.899200439453125000e+00 1.050765588879585266e-01 0.000000000000000000e+00 1.482562255859375000e+03 1.624013781547546387e+00 4.000000000000000000e+00 2.888370971679687500e+02 -6.025000000000000000e+01 5.275000000000000000e+01
6.000000000000000000e+01 1.104523076923076815e+03 5.159888305664062500e+02 -2.514648437500000000e+00 1.561134904623031616e-01 0.000000000000000000e+00 1.495607055664062500e+03 1.526994824409484863e+00 4.000000000000000000e+00 4.204334716796875000e+02 -5.975000000000000000e+01 5.275000000000000000e+01
5.100000000000000000e+01 1.130184615384615199e+03 5.247004394531250000e+02 -2.143249511718750000e+00 1.311841905117034912e-01 0.000000000000000000e+00 1.505333862304687500e+03 1.543492674827575684e+00 4.000000000000000000e+00 3.681112365722656250e+02 -5.925000000000000000e+01 5.275000000000000000e+01
4.300000000000000000e+01 1.144161538461538385e+03 5.363370971679687500e+02 -1.771850585937500000e+00 1.172099336981773376e-01 0.000000000000000000e+00 1.515060546875000000e+03 1.359657526016235352e+00 3.000000000000000000e+00 3.700299377441406250e+02 -5.875000000000000000e+01 5.275000000000000000e+01
6.300000000000000000e+01 1.173169230769230353e+03 5.426690673828125000e+02 -1.078857421875000000e+00 1.093920990824699402e-01 0.000000000000000000e+00 1.515560424804687500e+03 6.088246107101440430e-01 4.000000000000000000e+00 3.679127197265625000e+02 -5.775000000000000000e+01 5.275000000000000000e+01
5.900000000000000000e+01 1.175369230769231308e+03 5.247181396484375000e+02 -7.738342285156250000e-01 9.999999776482582092e-03 0.000000000000000000e+00 1.500015625000000000e+03 6.035017967224121094e-01 4.000000000000000000e+00 3.426024475097656250e+02 -5.725000000000000000e+01 5.275000000000000000e+01
5.600000000000000000e+01 1.158899999999999864e+03 4.947033996582031250e+02 -4.688415527343750000e-01 9.999999776482582092e-03 0.000000000000000000e+00 1.484470825195312500e+03 6.118850708007812500e-01 4.000000000000000000e+00 1.988577880859375000e+02 -5.675000000000000000e+01 5.275000000000000000e+01
7.100000000000000000e+01 1.939846153846153356e+03 5.009942016601562500e+02 8.300476074218750000e+00 0.000000000000000000e+00 0.000000000000000000e+00 3.157925781250000000e+03 2.236181974411010742e+00 4.000000000000000000e+00 2.487668457031250000e+02 -1.322500000000000000e+02 5.325000000000000000e+01
5.900000000000000000e+01 3.010630769230771421e+03 6.183909301757812500e+02 3.028411865234375000e+00 0.000000000000000000e+00 0.000000000000000000e+00 1.757555908203125000e+03 2.028481245040893555e+00 4.000000000000000000e+00 6.434152221679687500e+02 -1.287500000000000000e+02 5.325000000000000000e+01
0.000000000000000000e+00 2.142523076923077042e+03 6.170579833984375000e+02 1.131347656250000000e+00 0.000000000000000000e+00 0.000000000000000000e+00 1.363314208984375000e+03 1.274380326271057129e+00 1.000000000000000000e+00 1.589154907226562500e+03 -1.277500000000000000e+02 5.325000000000000000e+01
2.000000000000000000e+00 1.705207692307692923e+03 5.320778808593750000e+02 5.015563964843750000e-01 0.000000000000000000e+00 0.000000000000000000e+00 1.274896606445312500e+03 1.214390516281127930e+00 1.000000000000000000e+00 1.174998046875000000e+03 -1.272500000000000000e+02 5.325000000000000000e+01
5.900000000000000000e+01 6.442538461538460979e+02 2.749826660156250000e+02 -4.314575195312500000e-01 0.000000000000000000e+00 5.882353186607360840e-01 1.335753173828125000e+03 1.836037158966064453e+00 4.000000000000000000e+00 1.011596496582031250e+03 -1.257500000000000000e+02 5.325000000000000000e+01
2.000000000000000000e+01 5.607538461538459842e+02 2.048036804199218750e+02 -6.957397460937500000e-01 0.000000000000000000e+00 6.470588445663452148e-01 1.339872314453125000e+03 1.833534955978393555e+00 3.000000000000000000e+00 1.223620727539062500e+03 -1.252500000000000000e+02 5.325000000000000000e+01
5.300000000000000000e+01 5.165692307692308987e+02 1.952169799804687500e+02 -9.444274902343750000e-01 0.000000000000000000e+00 1.176470592617988586e-01 1.338602661132812500e+03 1.820217967033386230e+00 4.000000000000000000e+00 1.064626464843750000e+03 -1.247500000000000000e+02 5.325000000000000000e+01
5.500000000000000000e+01 4.873615384615385437e+02 2.332355804443359375e+02 -1.193115234375000000e+00 0.000000000000000000e+00 3.529411852359771729e-01 1.337333007812500000e+03 1.826536655426025391e+00 4.000000000000000000e+00 1.125214477539062500e+03 -1.242500000000000000e+02 5.325000000000000000e+01
4.500000000000000000e+01 4.820461538461540840e+02 2.768065185546875000e+02 -1.441833496093750000e+00 0.000000000000000000e+00 7.647058963775634766e-01 1.336063232421875000e+03 1.869390249252319336e+00 4.000000000000000000e+00 9.190346679687500000e+02 -1.237500000000000000e+02 5.325000000000000000e+01
4.500000000000000000e+01 5.171461538461538794e+02 2.865669250488281250e+02 -1.569488525390625000e+00 0.000000000000000000e+00 8.823529481887817383e-01 1.324277465820312500e+03 1.954197645187377930e+00 4.000000000000000000e+00 8.499434814453125000e+02 -1.232500000000000000e+02 5.325000000000000000e+01
1.700000000000000000e+01 5.887923076923076451e+02 2.855379943847656250e+02 -1.697174072265625000e+00 0.000000000000000000e+00 1.764705926179885864e-01 1.312491821289062500e+03 2.010566473007202148e+00 3.000000000000000000e+00 7.447448120117187500e+02 -1.227500000000000000e+02 5.325000000000000000e+01
6.900000000000000000e+01 7.476846153846151992e+02 2.889152221679687500e+02 -1.824829101562500000e+00 0.000000000000000000e+00 0.000000000000000000e+00 1.300706054687500000e+03 1.652362704277038574e+00 4.000000000000000000e+00 9.447837524414062500e+02 -1.222500000000000000e+02 5.325000000000000000e+01
6.600000000000000000e+01 8.997153846153844370e+02 3.078505554199218750e+02 -1.970581054687500000e+00 9.999999776482582092e-03 0.000000000000000000e+00 1.280999633789062500e+03 1.258212924003601074e+00 4.000000000000000000e+00 1.163463012695312500e+03 -1.217500000000000000e+02 5.325000000000000000e+01
3.000000000000000000e+00 9.226153846153841869e+02 3.060389709472656250e+02 -2.370635986328125000e+00 4.221104085445404053e-01 0.000000000000000000e+00 1.194062377929687500e+03 7.577629685401916504e-01 1.000000000000000000e+00 1.552817871093750000e+03 -1.207500000000000000e+02 5.325000000000000000e+01
6.500000000000000000e+01 8.289384615384611834e+02 2.850794067382812500e+02 -2.570648193359375000e+00 1.546230912208557129e-01 5.882352963089942932e-02 1.150593750000000000e+03 1.357347607612609863e+00 4.000000000000000000e+00 1.397042968750000000e+03 -1.202500000000000000e+02 5.325000000000000000e+01
[truncated: 1,069,661 more chars]
