# Supplementary material for: Environmental Conditions for Alternative Tree Cover States in HighLatitudes
Source: Copernicus journal article supplement (doi:10.5194/bg-2016-401), 2016-10-11
Supplement: Supplementary file 4 [file bg-2016-401-supplement.zip › Analysis/files_to_load_and_import/boreal_na_east_database.txt]

4.000000000000000000e+00 5.469692307692307622e+02 2.696683959960937500e+02 4.655456542968750000e+00 0.000000000000000000e+00 0.000000000000000000e+00 3.319161132812500000e+03 3.937541961669921875e+00 1.000000000000000000e+00 5.045122680664062500e+02 -9.925000000000000000e+01 4.525000000000000000e+01
5.000000000000000000e+00 5.794153846153845961e+02 2.693516540527343750e+02 4.622741699218750000e+00 0.000000000000000000e+00 2.941176593303680420e-01 3.318472656250000000e+03 3.930151700973510742e+00 1.000000000000000000e+00 4.106708374023437500e+02 -9.875000000000000000e+01 4.525000000000000000e+01
6.300000000000000000e+01 7.743615384615380890e+02 3.431378784179687500e+02 3.908905029296875000e+00 0.000000000000000000e+00 0.000000000000000000e+00 3.129231445312500000e+03 3.970267772674560547e+00 4.000000000000000000e+00 2.857077331542968750e+02 -9.275000000000000000e+01 4.525000000000000000e+01
5.800000000000000000e+01 7.926076923076926732e+02 3.855066223144531250e+02 4.164611816406250000e+00 0.000000000000000000e+00 0.000000000000000000e+00 3.121708740234375000e+03 3.830453872680664062e+00 4.000000000000000000e+00 3.564528503417968750e+02 -9.125000000000000000e+01 4.525000000000000000e+01
4.900000000000000000e+01 7.869846153846154948e+02 4.076825256347656250e+02 4.352508544921875000e+00 0.000000000000000000e+00 0.000000000000000000e+00 3.126727050781250000e+03 3.089573383331298828e+00 4.000000000000000000e+00 3.954749450683593750e+02 -9.075000000000000000e+01 4.525000000000000000e+01
2.900000000000000000e+01 8.114384615384614108e+02 3.798137207031250000e+02 4.540374755859375000e+00 0.000000000000000000e+00 0.000000000000000000e+00 3.131396728515625000e+03 2.515947341918945312e+00 3.000000000000000000e+00 4.708270568847656250e+02 -9.025000000000000000e+01 4.525000000000000000e+01
5.700000000000000000e+01 8.001538461538461888e+02 3.764568786621093750e+02 4.750457763671875000e+00 0.000000000000000000e+00 0.000000000000000000e+00 3.019171386718750000e+03 3.596126317977905273e+00 4.000000000000000000e+00 4.281541442871093750e+02 -8.975000000000000000e+01 4.525000000000000000e+01
5.400000000000000000e+01 7.713999999999997499e+02 3.666658630371093750e+02 4.982727050781250000e+00 0.000000000000000000e+00 0.000000000000000000e+00 3.007521240234375000e+03 3.567088603973388672e+00 4.000000000000000000e+00 4.698607482910156250e+02 -8.925000000000000000e+01 4.525000000000000000e+01
6.000000000000000000e+01 7.464153846153842551e+02 3.977831420898437500e+02 5.215026855468750000e+00 0.000000000000000000e+00 0.000000000000000000e+00 2.991324707031250000e+03 3.337230920791625977e+00 4.000000000000000000e+00 4.423210144042968750e+02 -8.875000000000000000e+01 4.525000000000000000e+01
5.600000000000000000e+01 7.732615384615387484e+02 4.053438110351562500e+02 5.447296142578125000e+00 0.000000000000000000e+00 0.000000000000000000e+00 2.970255859375000000e+03 3.600231170654296875e+00 4.000000000000000000e+00 2.781997070312500000e+02 -8.825000000000000000e+01 4.525000000000000000e+01
5.300000000000000000e+01 7.809307692307688740e+02 3.964680175781250000e+02 5.494354248046875000e+00 0.000000000000000000e+00 0.000000000000000000e+00 2.918769775390625000e+03 3.755231857299804688e+00 4.000000000000000000e+00 2.068406524658203125e+02 -8.775000000000000000e+01 4.525000000000000000e+01
2.500000000000000000e+01 8.282461538461537884e+02 4.094894409179687500e+02 4.965698242187500000e+00 0.000000000000000000e+00 0.000000000000000000e+00 2.729503662109375000e+03 9.606044292449951172e-01 3.000000000000000000e+00 2.503367614746093750e+02 -8.425000000000000000e+01 4.525000000000000000e+01
6.900000000000000000e+01 1.086284615384615336e+03 3.840179748535156250e+02 3.721343994140625000e+00 0.000000000000000000e+00 0.000000000000000000e+00 2.717351074218750000e+03 9.614879488945007324e-01 4.000000000000000000e+00 2.606470031738281250e+02 -7.975000000000000000e+01 4.525000000000000000e+01
5.600000000000000000e+01 1.018969230769230535e+03 3.397614135742187500e+02 3.503753662109375000e+00 0.000000000000000000e+00 0.000000000000000000e+00 2.712248046875000000e+03 9.450535774230957031e-01 4.000000000000000000e+00 3.092456970214843750e+02 -7.925000000000000000e+01 4.525000000000000000e+01
6.700000000000000000e+01 9.966153846153846416e+02 3.889110412597656250e+02 3.216308593750000000e+00 0.000000000000000000e+00 0.000000000000000000e+00 2.661257812500000000e+03 9.163748621940612793e-01 4.000000000000000000e+00 4.441153259277343750e+02 -7.825000000000000000e+01 4.525000000000000000e+01
5.900000000000000000e+01 8.734846153846151537e+02 4.055255737304687500e+02 3.146484375000000000e+00 0.000000000000000000e+00 0.000000000000000000e+00 2.655050292968750000e+03 9.268832206726074219e-01 4.000000000000000000e+00 3.429736633300781250e+02 -7.775000000000000000e+01 4.525000000000000000e+01
6.600000000000000000e+01 8.759692307692307622e+02 3.794761352539062500e+02 3.076629638671875000e+00 0.000000000000000000e+00 0.000000000000000000e+00 2.648684570312500000e+03 9.418959021568298340e-01 4.000000000000000000e+00 3.086385498046875000e+02 -7.725000000000000000e+01 4.525000000000000000e+01
1.400000000000000000e+01 8.058384615384616154e+02 4.213399047851562500e+02 2.866485595703125000e+00 0.000000000000000000e+00 0.000000000000000000e+00 2.587696533203125000e+03 9.722930788993835449e-01 1.000000000000000000e+00 1.203653717041015625e+02 -7.625000000000000000e+01 4.525000000000000000e+01
1.400000000000000000e+01 9.248384615384613880e+02 4.829685974121093750e+02 2.740264892578125000e+00 0.000000000000000000e+00 0.000000000000000000e+00 2.579760253906250000e+03 1.429997086524963379e+00 1.000000000000000000e+00 9.532123565673828125e+01 -7.575000000000000000e+01 4.525000000000000000e+01
5.300000000000000000e+01 1.007999999999999886e+03 4.910429077148437500e+02 2.500915527343750000e+00 0.000000000000000000e+00 2.941176593303680420e-01 2.518484375000000000e+03 1.247510671615600586e+00 4.000000000000000000e+00 9.516970062255859375e+01 -7.475000000000000000e+01 4.525000000000000000e+01
5.100000000000000000e+01 1.197900000000001000e+03 5.579771118164062500e+02 2.170196533203125000e+00 0.000000000000000000e+00 2.941176593303680420e-01 2.463142578125000000e+03 9.503039121627807617e-01 4.000000000000000000e+00 1.238608398437500000e+02 -7.275000000000000000e+01 4.525000000000000000e+01
7.100000000000000000e+01 1.194061538461538021e+03 5.882686157226562500e+02 2.162841796875000000e+00 0.000000000000000000e+00 0.000000000000000000e+00 2.459522949218750000e+03 9.345657229423522949e-01 4.000000000000000000e+00 2.760216064453125000e+02 -7.225000000000000000e+01 4.525000000000000000e+01
4.000000000000000000e+01 1.216700000000000045e+03 5.370006713867187500e+02 2.155487060546875000e+00 0.000000000000000000e+00 0.000000000000000000e+00 2.456590820312500000e+03 9.169288277626037598e-01 3.000000000000000000e+00 3.017593383789062500e+02 -7.175000000000000000e+01 4.525000000000000000e+01
6.700000000000000000e+01 1.350184615384615199e+03 5.436701049804687500e+02 2.148101806640625000e+00 0.000000000000000000e+00 0.000000000000000000e+00 2.454624267578125000e+03 8.948280215263366699e-01 4.000000000000000000e+00 6.895606079101562500e+02 -7.125000000000000000e+01 4.525000000000000000e+01
6.600000000000000000e+01 1.358453846153846371e+03 5.435772705078125000e+02 2.265899658203125000e+00 0.000000000000000000e+00 0.000000000000000000e+00 2.464870605468750000e+03 8.719891309738159180e-01 4.000000000000000000e+00 7.850031127929687500e+02 -7.075000000000000000e+01 4.525000000000000000e+01
4.600000000000000000e+01 1.324423076923075996e+03 5.447482299804687500e+02 2.383666992187500000e+00 0.000000000000000000e+00 0.000000000000000000e+00 2.468903076171875000e+03 8.708035349845886230e-01 4.000000000000000000e+00 3.980151672363281250e+02 -7.025000000000000000e+01 4.525000000000000000e+01
6.000000000000000000e+01 1.257876923076922822e+03 5.699851684570312500e+02 2.642333984375000000e+00 0.000000000000000000e+00 0.000000000000000000e+00 2.526920166015625000e+03 8.966609239578247070e-01 4.000000000000000000e+00 1.707548370361328125e+02 -6.925000000000000000e+01 4.525000000000000000e+01
5.600000000000000000e+01 1.142269230769230717e+03 5.576562500000000000e+02 2.852600097656250000e+00 0.000000000000000000e+00 0.000000000000000000e+00 2.537119873046875000e+03 9.199827909469604492e-01 4.000000000000000000e+00 9.235324096679687500e+01 -6.875000000000000000e+01 4.525000000000000000e+01
6.300000000000000000e+01 1.204276923076922458e+03 5.690910034179687500e+02 3.062866210937500000e+00 0.000000000000000000e+00 0.000000000000000000e+00 2.548357666015625000e+03 9.193690419197082520e-01 4.000000000000000000e+00 9.380888366699218750e+01 -6.825000000000000000e+01 4.525000000000000000e+01
6.200000000000000000e+01 1.289069230769230899e+03 5.843118286132812500e+02 3.273132324218750000e+00 0.000000000000000000e+00 0.000000000000000000e+00 2.559870361328125000e+03 1.374963521957397461e+00 4.000000000000000000e+00 1.009424133300781250e+02 -6.775000000000000000e+01 4.525000000000000000e+01
6.400000000000000000e+01 1.369376923076922822e+03 5.764167480468750000e+02 3.528778076171875000e+00 0.000000000000000000e+00 0.000000000000000000e+00 2.586782714843750000e+03 2.262581348419189453e+00 4.000000000000000000e+00 9.084842681884765625e+01 -6.725000000000000000e+01 4.525000000000000000e+01
3.400000000000000000e+01 1.241907692307691377e+03 5.323687133789062500e+02 5.638488769531250000e+00 0.000000000000000000e+00 0.000000000000000000e+00 2.561031005859375000e+03 1.991263747215270996e+00 3.000000000000000000e+00 7.335133361816406250e+01 -6.325000000000000000e+01 4.525000000000000000e+01
4.100000000000000000e+01 1.377430769230769101e+03 5.069645080566406250e+02 5.875183105468750000e+00 0.000000000000000000e+00 0.000000000000000000e+00 2.554607177734375000e+03 2.198659420013427734e+00 3.000000000000000000e+00 2.026185760498046875e+02 -6.275000000000000000e+01 4.525000000000000000e+01
4.000000000000000000e+00 4.858384615384615586e+02 2.338948974609375000e+02 4.350097656250000000e+00 0.000000000000000000e+00 0.000000000000000000e+00 3.336635986328125000e+03 3.883026599884033203e+00 1.000000000000000000e+00 5.648046264648437500e+02 -9.975000000000000000e+01 4.575000000000000000e+01
6.000000000000000000e+00 5.261384615384615699e+02 2.595296325683593750e+02 4.365753173828125000e+00 0.000000000000000000e+00 0.000000000000000000e+00 3.323647216796875000e+03 3.879936933517456055e+00 1.000000000000000000e+00 5.911144409179687500e+02 -9.925000000000000000e+01 4.575000000000000000e+01
3.000000000000000000e+00 5.776769230769230035e+02 2.889544372558593750e+02 4.324340820312500000e+00 0.000000000000000000e+00 3.529411852359771729e-01 3.321112792968750000e+03 3.882982492446899414e+00 1.000000000000000000e+00 3.921739807128906250e+02 -9.825000000000000000e+01 4.575000000000000000e+01
5.500000000000000000e+01 7.190230769230772694e+02 3.119446411132812500e+02 3.655761718750000000e+00 0.000000000000000000e+00 2.941176593303680420e-01 3.179280029296875000e+03 3.858378171920776367e+00 4.000000000000000000e+00 3.810711364746093750e+02 -9.475000000000000000e+01 4.575000000000000000e+01
4.000000000000000000e+01 7.591461538461539931e+02 3.280381469726562500e+02 3.474639892578125000e+00 0.000000000000000000e+00 0.000000000000000000e+00 3.122530517578125000e+03 3.891089677810668945e+00 3.000000000000000000e+00 2.705220947265625000e+02 -9.275000000000000000e+01 4.575000000000000000e+01
4.500000000000000000e+01 7.576230769230769511e+02 3.445300903320312500e+02 3.486785888671875000e+00 0.000000000000000000e+00 0.000000000000000000e+00 3.120168457031250000e+03 3.837877273559570312e+00 4.000000000000000000e+00 3.208588256835937500e+02 -9.225000000000000000e+01 4.575000000000000000e+01
5.800000000000000000e+01 7.552846153846151083e+02 3.723968811035156250e+02 3.550445556640625000e+00 0.000000000000000000e+00 0.000000000000000000e+00 3.111820312500000000e+03 3.353128671646118164e+00 4.000000000000000000e+00 3.933424072265625000e+02 -9.175000000000000000e+01 4.575000000000000000e+01
4.400000000000000000e+01 7.529076923076924004e+02 3.768558959960937500e+02 3.768646240234375000e+00 0.000000000000000000e+00 0.000000000000000000e+00 3.119025146484375000e+03 1.885235667228698730e+00 3.000000000000000000e+00 3.856524658203125000e+02 -9.125000000000000000e+01 4.575000000000000000e+01
4.500000000000000000e+01 7.990461538461538566e+02 3.642040405273437500e+02 4.205078125000000000e+00 0.000000000000000000e+00 0.000000000000000000e+00 3.136117431640625000e+03 3.561506986618041992e+00 4.000000000000000000e+00 4.685121459960937500e+02 -9.025000000000000000e+01 4.575000000000000000e+01
4.800000000000000000e+01 7.805615384615383618e+02 3.609486694335937500e+02 4.426300048828125000e+00 0.000000000000000000e+00 0.000000000000000000e+00 3.043817871093750000e+03 2.319310426712036133e+00 4.000000000000000000e+00 4.818140563964843750e+02 -8.975000000000000000e+01 4.575000000000000000e+01
4.700000000000000000e+01 7.530615384615385892e+02 3.853658447265625000e+02 4.650543212890625000e+00 0.000000000000000000e+00 0.000000000000000000e+00 3.030002685546875000e+03 1.462739467620849609e+00 4.000000000000000000e+00 5.006720581054687500e+02 -8.925000000000000000e+01 4.575000000000000000e+01
6.100000000000000000e+01 7.186230769230767237e+02 3.974042968750000000e+02 4.874786376953125000e+00 0.000000000000000000e+00 0.000000000000000000e+00 3.011453613281250000e+03 9.159872531890869141e-01 4.000000000000000000e+00 4.835430297851562500e+02 -8.875000000000000000e+01 4.575000000000000000e+01
5.400000000000000000e+01 7.572000000000002728e+02 3.810452880859375000e+02 5.099029541015625000e+00 0.000000000000000000e+00 0.000000000000000000e+00 2.986979492187500000e+03 9.417324662208557129e-01 4.000000000000000000e+00 3.952954101562500000e+02 -8.825000000000000000e+01 4.575000000000000000e+01
1.800000000000000000e+01 7.931999999999999318e+02 3.751127014160156250e+02 5.130889892578125000e+00 0.000000000000000000e+00 0.000000000000000000e+00 2.929010253906250000e+03 9.597558379173278809e-01 1.000000000000000000e+00 2.927509765625000000e+02 -8.775000000000000000e+01 4.575000000000000000e+01
5.400000000000000000e+01 9.981384615384614563e+02 3.966619567871093750e+02 3.103057861328125000e+00 0.000000000000000000e+00 0.000000000000000000e+00 2.724597656250000000e+03 9.514601230621337891e-01 4.000000000000000000e+00 2.296415710449218750e+02 -8.025000000000000000e+01 4.575000000000000000e+01
6.100000000000000000e+01 1.058207692307692014e+03 4.118653564453125000e+02 2.948486328125000000e+00 0.000000000000000000e+00 2.352941185235977173e-01 2.717898925781250000e+03 9.381765723228454590e-01 4.000000000000000000e+00 3.042209472656250000e+02 -7.975000000000000000e+01 4.575000000000000000e+01
6.300000000000000000e+01 1.029430769230770011e+03 4.143117065429687500e+02 2.793914794921875000e+00 0.000000000000000000e+00 0.000000000000000000e+00 2.711020263671875000e+03 9.151687622070312500e-01 4.000000000000000000e+00 4.207136230468750000e+02 -7.925000000000000000e+01 4.575000000000000000e+01
5.100000000000000000e+01 1.054861538461537748e+03 4.191122436523437500e+02 2.639343261718750000e+00 0.000000000000000000e+00 0.000000000000000000e+00 2.704698730468750000e+03 9.019773602485656738e-01 4.000000000000000000e+00 4.522931518554687500e+02 -7.875000000000000000e+01 4.575000000000000000e+01
6.500000000000000000e+01 9.450615384615383618e+02 4.169147338867187500e+02 2.607421875000000000e+00 0.000000000000000000e+00 0.000000000000000000e+00 2.664086914062500000e+03 8.998112678527832031e-01 4.000000000000000000e+00 4.629186096191406250e+02 -7.825000000000000000e+01 4.575000000000000000e+01
5.200000000000000000e+01 8.289538461538461434e+02 3.953965759277343750e+02 2.575531005859375000e+00 0.000000000000000000e+00 0.000000000000000000e+00 2.655693603515625000e+03 9.259387850761413574e-01 4.000000000000000000e+00 2.760239562988281250e+02 -7.775000000000000000e+01 4.575000000000000000e+01
5.500000000000000000e+01 8.382230769230770875e+02 3.843036193847656250e+02 2.543609619140625000e+00 0.000000000000000000e+00 8.235294222831726074e-01 2.647251708984375000e+03 9.459466934204101562e-01 4.000000000000000000e+00 1.865707855224609375e+02 -7.725000000000000000e+01 4.575000000000000000e+01
6.200000000000000000e+01 1.001353846153846348e+03 4.618544921875000000e+02 2.403564453125000000e+00 0.000000000000000000e+00 0.000000000000000000e+00 2.590334960937500000e+03 9.374040365219116211e-01 4.000000000000000000e+00 2.550958709716796875e+02 -7.625000000000000000e+01 4.575000000000000000e+01
6.200000000000000000e+01 1.018653846153845961e+03 5.001443786621093750e+02 2.310668945312500000e+00 0.000000000000000000e+00 0.000000000000000000e+00 2.579305664062500000e+03 9.369126558303833008e-01 4.000000000000000000e+00 2.293017120361328125e+02 -7.575000000000000000e+01 4.575000000000000000e+01
6.000000000000000000e+01 1.052599999999999909e+03 5.129161987304687500e+02 2.217803955078125000e+00 0.000000000000000000e+00 0.000000000000000000e+00 2.568727539062500000e+03 9.300630688667297363e-01 4.000000000000000000e+00 2.563749694824218750e+02 -7.525000000000000000e+01 4.575000000000000000e+01
4.600000000000000000e+01 1.065684615384614972e+03 5.315325927734375000e+02 2.119201660156250000e+00 0.000000000000000000e+00 0.000000000000000000e+00 2.521252929687500000e+03 9.313778281211853027e-01 4.000000000000000000e+00 2.265335540771484375e+02 -7.475000000000000000e+01 4.575000000000000000e+01
6.000000000000000000e+01 1.128153846153846644e+03 5.210023193359375000e+02 2.014862060546875000e+00 0.000000000000000000e+00 0.000000000000000000e+00 2.510943115234375000e+03 1.602787494659423828e+00 4.000000000000000000e+00 2.675225219726562500e+02 -7.425000000000000000e+01 4.575000000000000000e+01
6.300000000000000000e+01 1.084499999999999545e+03 5.034533081054687500e+02 1.910522460937500000e+00 0.000000000000000000e+00 0.000000000000000000e+00 2.500235107421875000e+03 3.415514945983886719e+00 4.000000000000000000e+00 5.585673141479492188e+01 -7.375000000000000000e+01 4.575000000000000000e+01
1.600000000000000000e+01 1.099438461538461979e+03 5.709292602539062500e+02 1.708953857421875000e+00 0.000000000000000000e+00 2.352941185235977173e-01 2.456335449218750000e+03 9.406006336212158203e-01 1.000000000000000000e+00 1.445616149902343750e+02 -7.225000000000000000e+01 4.575000000000000000e+01
3.700000000000000000e+01 1.394092307692307713e+03 5.407262573242187500e+02 1.668304443359375000e+00 0.000000000000000000e+00 0.000000000000000000e+00 2.451965332031250000e+03 9.065047502517700195e-01 3.000000000000000000e+00 2.908373718261718750e+02 -7.175000000000000000e+01 4.575000000000000000e+01
4.800000000000000000e+01 1.377838461538461388e+03 5.204317626953125000e+02 1.627655029296875000e+00 0.000000000000000000e+00 0.000000000000000000e+00 2.449320312500000000e+03 8.933089971542358398e-01 4.000000000000000000e+00 3.527694396972656250e+02 -7.125000000000000000e+01 4.575000000000000000e+01
6.000000000000000000e+01 1.150284615384615336e+03 5.197618408203125000e+02 1.705688476562500000e+00 0.000000000000000000e+00 0.000000000000000000e+00 2.459083984375000000e+03 8.862516283988952637e-01 4.000000000000000000e+00 3.955530090332031250e+02 -7.075000000000000000e+01 4.575000000000000000e+01
6.600000000000000000e+01 1.201423076923077133e+03 5.215807495117187500e+02 1.783752441406250000e+00 0.000000000000000000e+00 0.000000000000000000e+00 2.464739013671875000e+03 8.714466094970703125e-01 4.000000000000000000e+00 5.849837646484375000e+02 -7.025000000000000000e+01 4.575000000000000000e+01
6.800000000000000000e+01 1.205853846153846234e+03 5.560482177734375000e+02 1.971099853515625000e+00 0.000000000000000000e+00 0.000000000000000000e+00 2.517939941406250000e+03 8.839658498764038086e-01 4.000000000000000000e+00 3.532673645019531250e+02 -6.925000000000000000e+01 4.575000000000000000e+01
6.100000000000000000e+01 1.152646153846153993e+03 5.546845092773437500e+02 2.377258300781250000e+00 0.000000000000000000e+00 0.000000000000000000e+00 2.547488525390625000e+03 9.163369536399841309e-01 4.000000000000000000e+00 1.563813781738281250e+02 -6.825000000000000000e+01 4.575000000000000000e+01
6.300000000000000000e+01 1.260115384615384528e+03 5.718708496093750000e+02 2.580352783203125000e+00 0.000000000000000000e+00 0.000000000000000000e+00 2.562993408203125000e+03 9.168884754180908203e-01 4.000000000000000000e+00 1.596933441162109375e+02 -6.775000000000000000e+01 4.575000000000000000e+01
6.500000000000000000e+01 1.327969230769230307e+03 5.392333374023437500e+02 3.176269531250000000e+00 0.000000000000000000e+00 0.000000000000000000e+00 2.600769287109375000e+03 1.735195636749267578e+00 4.000000000000000000e+00 8.172579193115234375e+01 -6.675000000000000000e+01 4.575000000000000000e+01
6.800000000000000000e+01 1.326584615384615063e+03 5.685342407226562500e+02 3.835418701171875000e+00 0.000000000000000000e+00 0.000000000000000000e+00 2.616437255859375000e+03 1.131384134292602539e+00 4.000000000000000000e+00 1.275015487670898438e+02 -6.575000000000000000e+01 4.575000000000000000e+01
3.600000000000000000e+01 1.486915384615384937e+03 5.738226928710937500e+02 4.143218994140625000e+00 0.000000000000000000e+00 0.000000000000000000e+00 2.623920898437500000e+03 8.873152732849121094e-01 3.000000000000000000e+00 2.176613922119140625e+02 -6.525000000000000000e+01 4.575000000000000000e+01
3.300000000000000000e+01 6.989307692307692150e+02 3.186767578125000000e+02 3.267181396484375000e+00 0.000000000000000000e+00 0.000000000000000000e+00 3.177931884765625000e+03 3.805998563766479492e+00 3.000000000000000000e+00 3.863222045898437500e+02 -9.475000000000000000e+01 4.625000000000000000e+01
2.800000000000000000e+01 7.173384615384615017e+02 3.388679504394531250e+02 3.028045654296875000e+00 0.000000000000000000e+00 0.000000000000000000e+00 3.118747314453125000e+03 3.767975568771362305e+00 3.000000000000000000e+00 3.860020446777343750e+02 -9.325000000000000000e+01 4.625000000000000000e+01
3.800000000000000000e+01 7.417538461538458705e+02 3.394151916503906250e+02 3.040405273437500000e+00 0.000000000000000000e+00 0.000000000000000000e+00 3.113697021484375000e+03 3.782386302947998047e+00 3.000000000000000000e+00 3.566663818359375000e+02 -9.275000000000000000e+01 4.625000000000000000e+01
4.500000000000000000e+01 7.400076923076926505e+02 3.375303649902343750e+02 3.052764892578125000e+00 0.000000000000000000e+00 0.000000000000000000e+00 3.040935791015625000e+03 1.660552382469177246e+00 4.000000000000000000e+00 3.573491516113281250e+02 -9.225000000000000000e+01 4.625000000000000000e+01
4.300000000000000000e+01 7.577461538461540158e+02 3.599529418945312500e+02 3.124176025390625000e+00 0.000000000000000000e+00 0.000000000000000000e+00 3.044729248046875000e+03 1.139759421348571777e+00 3.000000000000000000e+00 3.298418884277343750e+02 -9.175000000000000000e+01 4.625000000000000000e+01
4.100000000000000000e+01 7.105769230769230944e+02 3.739111938476562500e+02 3.372711181640625000e+00 0.000000000000000000e+00 0.000000000000000000e+00 3.112397705078125000e+03 1.073204040527343750e+00 3.000000000000000000e+00 4.290896301269531250e+02 -9.125000000000000000e+01 4.625000000000000000e+01
5.900000000000000000e+01 7.191538461538465299e+02 4.060498352050781250e+02 3.621215820312500000e+00 0.000000000000000000e+00 0.000000000000000000e+00 3.131794433593750000e+03 9.355932474136352539e-01 4.000000000000000000e+00 4.554218444824218750e+02 -9.075000000000000000e+01 4.625000000000000000e+01
5.700000000000000000e+01 7.842000000000002728e+02 4.112475891113281250e+02 3.869750976562500000e+00 0.000000000000000000e+00 0.000000000000000000e+00 3.100885253906250000e+03 1.091990590095520020e+00 4.000000000000000000e+00 5.100095520019531250e+02 -9.025000000000000000e+01 4.625000000000000000e+01
4.000000000000000000e+01 7.709461538461539476e+02 3.848157653808593750e+02 4.102111816406250000e+00 0.000000000000000000e+00 0.000000000000000000e+00 3.105143798828125000e+03 1.078135967254638672e+00 3.000000000000000000e+00 5.059528198242187500e+02 -8.975000000000000000e+01 4.625000000000000000e+01
4.700000000000000000e+01 7.451692307692311488e+02 3.996348571777343750e+02 4.318328857421875000e+00 0.000000000000000000e+00 0.000000000000000000e+00 3.059632812500000000e+03 8.991410732269287109e-01 4.000000000000000000e+00 5.262229003906250000e+02 -8.925000000000000000e+01 4.625000000000000000e+01
6.200000000000000000e+01 7.223307692307688512e+02 3.984039916992187500e+02 4.534576416015625000e+00 0.000000000000000000e+00 0.000000000000000000e+00 3.041530273437500000e+03 9.007092714309692383e-01 4.000000000000000000e+00 4.647298583984375000e+02 -8.875000000000000000e+01 4.625000000000000000e+01
5.900000000000000000e+01 7.245461538461537430e+02 3.857439880371093750e+02 4.750793457031250000e+00 0.000000000000000000e+00 0.000000000000000000e+00 2.914254882812500000e+03 9.142629504203796387e-01 4.000000000000000000e+00 4.662372436523437500e+02 -8.825000000000000000e+01 4.625000000000000000e+01
6.500000000000000000e+01 9.172076923076919002e+02 4.322235717773437500e+02 4.717529296875000000e+00 0.000000000000000000e+00 0.000000000000000000e+00 2.871667480468750000e+03 9.375448226928710938e-01 4.000000000000000000e+00 3.420097045898437500e+02 -8.725000000000000000e+01 4.625000000000000000e+01
6.500000000000000000e+01 9.118230769230774513e+02 4.950686645507812500e+02 4.667633056640625000e+00 0.000000000000000000e+00 0.000000000000000000e+00 2.765079833984375000e+03 9.380130767822265625e-01 4.000000000000000000e+00 2.576682128906250000e+02 -8.675000000000000000e+01 4.625000000000000000e+01
5.600000000000000000e+01 8.055461538461532882e+02 4.675172424316406250e+02 4.617736816406250000e+00 0.000000000000000000e+00 0.000000000000000000e+00 2.637604248046875000e+03 1.938717365264892578e+00 4.000000000000000000e+00 2.208110504150390625e+02 -8.625000000000000000e+01 4.625000000000000000e+01
6.200000000000000000e+01 7.002384615384614790e+02 4.115047302246093750e+02 4.246490478515625000e+00 0.000000000000000000e+00 2.352941185235977173e-01 2.752680419921875000e+03 9.252884387969970703e-01 4.000000000000000000e+00 2.407530059814453125e+02 -8.525000000000000000e+01 4.625000000000000000e+01
6.500000000000000000e+01 7.798307692307691923e+02 4.058307189941406250e+02 4.060852050781250000e+00 0.000000000000000000e+00 0.000000000000000000e+00 2.722876708984375000e+03 1.262503981590270996e+00 4.000000000000000000e+00 2.140089416503906250e+02 -8.475000000000000000e+01 4.625000000000000000e+01
4.600000000000000000e+01 8.204230769230770193e+02 3.807220153808593750e+02 3.862213134765625000e+00 0.000000000000000000e+00 0.000000000000000000e+00 2.752462646484375000e+03 2.360927104949951172e+00 4.000000000000000000e+00 1.820630187988281250e+02 -8.425000000000000000e+01 4.625000000000000000e+01
4.800000000000000000e+01 8.447461538461540158e+02 3.314038085937500000e+02 2.752410888671875000e+00 0.000000000000000000e+00 0.000000000000000000e+00 2.780281005859375000e+03 1.841939806938171387e+00 4.000000000000000000e+00 2.223423309326171875e+02 -8.175000000000000000e+01 4.625000000000000000e+01
4.300000000000000000e+01 8.254076923076918320e+02 4.063440856933593750e+02 2.382110595703125000e+00 0.000000000000000000e+00 0.000000000000000000e+00 2.702580322265625000e+03 9.473316073417663574e-01 3.000000000000000000e+00 2.259939575195312500e+02 -8.075000000000000000e+01 4.625000000000000000e+01
2.700000000000000000e+01 8.957538461538460979e+02 4.475372619628906250e+02 2.267150878906250000e+00 0.000000000000000000e+00 0.000000000000000000e+00 2.695428955078125000e+03 9.439798593521118164e-01 3.000000000000000000e+00 1.946758422851562500e+02 -8.025000000000000000e+01 4.625000000000000000e+01
3.800000000000000000e+01 9.457846153846151083e+02 4.889521179199218750e+02 2.084075927734375000e+00 0.000000000000000000e+00 0.000000000000000000e+00 2.708508056640625000e+03 9.312053918838500977e-01 3.000000000000000000e+00 2.459616241455078125e+02 -7.925000000000000000e+01 4.625000000000000000e+01
6.500000000000000000e+01 9.403999999999996362e+02 4.840434570312500000e+02 1.992553710937500000e+00 0.000000000000000000e+00 0.000000000000000000e+00 2.651744873046875000e+03 9.142066836357116699e-01 4.000000000000000000e+00 2.563043212890625000e+02 -7.875000000000000000e+01 4.625000000000000000e+01
7.100000000000000000e+01 9.007461538461536747e+02 4.543480529785156250e+02 1.998565673828125000e+00 0.000000000000000000e+00 0.000000000000000000e+00 2.669236816406250000e+03 9.115326404571533203e-01 4.000000000000000000e+00 2.557548217773437500e+02 -7.825000000000000000e+01 4.625000000000000000e+01
5.900000000000000000e+01 8.927153846153844370e+02 4.033090515136718750e+02 2.004577636718750000e+00 0.000000000000000000e+00 0.000000000000000000e+00 2.656326171875000000e+03 9.253548979759216309e-01 4.000000000000000000e+00 3.084174804687500000e+02 -7.775000000000000000e+01 4.625000000000000000e+01
6.500000000000000000e+01 8.949538461538468255e+02 3.933211669921875000e+02 2.010589599609375000e+00 0.000000000000000000e+00 0.000000000000000000e+00 2.589976318359375000e+03 9.313526749610900879e-01 4.000000000000000000e+00 3.019348144531250000e+02 -7.725000000000000000e+01 4.625000000000000000e+01
5.800000000000000000e+01 9.650461538461538566e+02 4.216457824707031250e+02 2.000213623046875000e+00 0.000000000000000000e+00 0.000000000000000000e+00 2.586224609375000000e+03 9.199632406234741211e-01 4.000000000000000000e+00 2.927533874511718750e+02 -7.675000000000000000e+01 4.625000000000000000e+01
6.300000000000000000e+01 9.464384615384610697e+02 5.032089233398437500e+02 1.881103515625000000e+00 0.000000000000000000e+00 0.000000000000000000e+00 2.577852539062500000e+03 9.180198311805725098e-01 4.000000000000000000e+00 3.250304870605468750e+02 -7.575000000000000000e+01 4.625000000000000000e+01
3.500000000000000000e+01 1.014600000000000591e+03 5.220895385742187500e+02 1.821563720703125000e+00 0.000000000000000000e+00 0.000000000000000000e+00 2.507330810546875000e+03 9.043288230895996094e-01 3.000000000000000000e+00 3.410028991699218750e+02 -7.525000000000000000e+01 4.625000000000000000e+01
6.900000000000000000e+01 1.094330769230769420e+03 5.481616210937500000e+02 1.628875732421875000e+00 0.000000000000000000e+00 0.000000000000000000e+00 2.511954833984375000e+03 8.829041719436645508e-01 4.000000000000000000e+00 4.882854003906250000e+02 -7.425000000000000000e+01 4.625000000000000000e+01
3.600000000000000000e+01 1.059776923076923367e+03 5.255335693359375000e+02 1.520294189453125000e+00 0.000000000000000000e+00 0.000000000000000000e+00 2.494542724609375000e+03 8.862539529800415039e-01 3.000000000000000000e+00 2.838650207519531250e+02 -7.375000000000000000e+01 4.625000000000000000e+01
6.800000000000000000e+01 1.150407692307692287e+03 5.038307800292968750e+02 1.411682128906250000e+00 0.000000000000000000e+00 2.352941185235977173e-01 2.426549316406250000e+03 1.836852192878723145e+00 4.000000000000000000e+00 1.738219757080078125e+02 -7.325000000000000000e+01 4.625000000000000000e+01
3.800000000000000000e+01 1.119223076923076860e+03 5.213794555664062500e+02 1.255096435546875000e+00 0.000000000000000000e+00 0.000000000000000000e+00 2.452386474609375000e+03 2.311452627182006836e+00 3.000000000000000000e+00 8.318289184570312500e+01 -7.225000000000000000e+01 4.625000000000000000e+01
6.700000000000000000e+01 1.238338461538461843e+03 5.403292236328125000e+02 1.181152343750000000e+00 0.000000000000000000e+00 0.000000000000000000e+00 2.443922851562500000e+03 9.063367843627929688e-01 4.000000000000000000e+00 1.645994873046875000e+02 -7.175000000000000000e+01 4.625000000000000000e+01
4.800000000000000000e+01 1.306930769230768874e+03 5.357221069335937500e+02 1.107177734375000000e+00 0.000000000000000000e+00 0.000000000000000000e+00 2.390313720703125000e+03 8.877968788146972656e-01 4.000000000000000000e+00 3.428386840820312500e+02 -7.125000000000000000e+01 4.625000000000000000e+01
6.200000000000000000e+01 1.204638461538461797e+03 5.315548706054687500e+02 1.145507812500000000e+00 0.000000000000000000e+00 0.000000000000000000e+00 2.449380859375000000e+03 8.821114897727966309e-01 4.000000000000000000e+00 2.967801818847656250e+02 -7.075000000000000000e+01 4.625000000000000000e+01
5.500000000000000000e+01 1.193384615384615927e+03 4.960264587402343750e+02 1.183837890625000000e+00 0.000000000000000000e+00 0.000000000000000000e+00 2.459519531250000000e+03 8.683128356933593750e-01 4.000000000000000000e+00 4.172632751464843750e+02 -7.025000000000000000e+01 4.625000000000000000e+01
6.800000000000000000e+01 1.149669230769231035e+03 5.215689086914062500e+02 1.222137451171875000e+00 0.000000000000000000e+00 0.000000000000000000e+00 2.427448242187500000e+03 8.709378838539123535e-01 4.000000000000000000e+00 4.704704589843750000e+02 -6.975000000000000000e+01 4.625000000000000000e+01
6.100000000000000000e+01 1.110984615384615836e+03 5.459500122070312500e+02 1.299865722656250000e+00 0.000000000000000000e+00 0.000000000000000000e+00 2.436332275390625000e+03 8.769529461860656738e-01 4.000000000000000000e+00 3.133165588378906250e+02 -6.925000000000000000e+01 4.625000000000000000e+01
6.900000000000000000e+01 1.134615384615384301e+03 5.284024658203125000e+02 1.495788574218750000e+00 0.000000000000000000e+00 0.000000000000000000e+00 2.521808593750000000e+03 8.832520842552185059e-01 4.000000000000000000e+00 2.283243713378906250e+02 -6.875000000000000000e+01 4.625000000000000000e+01
4.800000000000000000e+01 1.126538461538461434e+03 5.109128417968750000e+02 1.691680908203125000e+00 0.000000000000000000e+00 0.000000000000000000e+00 2.547658935546875000e+03 8.901136517524719238e-01 4.000000000000000000e+00 2.676660766601562500e+02 -6.825000000000000000e+01 4.625000000000000000e+01
4.900000000000000000e+01 1.206315384615384573e+03 5.179691772460937500e+02 1.887573242187500000e+00 0.000000000000000000e+00 0.000000000000000000e+00 2.546516601562500000e+03 2.172959566116333008e+00 4.000000000000000000e+00 1.228268966674804688e+02 -6.775000000000000000e+01 4.625000000000000000e+01
6.700000000000000000e+01 1.335323076923076997e+03 5.199052124023437500e+02 2.164611816406250000e+00 0.000000000000000000e+00 0.000000000000000000e+00 2.558908203125000000e+03 8.838614225387573242e-01 4.000000000000000000e+00 2.204270019531250000e+02 -6.725000000000000000e+01 4.625000000000000000e+01
2.800000000000000000e+01 1.349792307692308668e+03 5.187103881835937500e+02 2.522735595703125000e+00 0.000000000000000000e+00 0.000000000000000000e+00 2.608261230468750000e+03 1.878321766853332520e+00 3.000000000000000000e+00 1.620578002929687500e+02 -6.675000000000000000e+01 4.625000000000000000e+01
4.600000000000000000e+01 1.278084615384615290e+03 5.180870361328125000e+02 2.880859375000000000e+00 0.000000000000000000e+00 0.000000000000000000e+00 2.630754150390625000e+03 2.224163532257080078e+00 4.000000000000000000e+00 1.620080108642578125e+02 -6.625000000000000000e+01 4.625000000000000000e+01
6.600000000000000000e+01 1.252200000000000273e+03 5.256549072265625000e+02 3.238983154296875000e+00 0.000000000000000000e+00 0.000000000000000000e+00 2.637626464843750000e+03 2.246647834777832031e+00 4.000000000000000000e+00 7.362239837646484375e+01 -6.575000000000000000e+01 4.625000000000000000e+01
6.200000000000000000e+01 1.272976923076923867e+03 5.510371093750000000e+02 3.600433349609375000e+00 0.000000000000000000e+00 0.000000000000000000e+00 2.625540771484375000e+03 1.857639431953430176e+00 4.000000000000000000e+00 9.304090881347656250e+01 -6.525000000000000000e+01 4.625000000000000000e+01
6.600000000000000000e+01 1.210646153846154448e+03 5.633942260742187500e+02 3.962982177734375000e+00 0.000000000000000000e+00 0.000000000000000000e+00 2.617487548828125000e+03 9.195128679275512695e-01 4.000000000000000000e+00 5.175208663940429688e+01 -6.475000000000000000e+01 4.625000000000000000e+01
3.100000000000000000e+01 6.684692307692309896e+02 3.276938171386718750e+02 3.008819580078125000e+00 0.000000000000000000e+00 0.000000000000000000e+00 3.185925781250000000e+03 3.738199949264526367e+00 3.000000000000000000e+00 4.519400024414062500e+02 -9.525000000000000000e+01 4.675000000000000000e+01
4.500000000000000000e+01 7.046923076923077360e+02 2.922017211914062500e+02 2.716461181640625000e+00 0.000000000000000000e+00 0.000000000000000000e+00 3.116756347656250000e+03 3.785373687744140625e+00 4.000000000000000000e+00 4.173846130371093750e+02 -9.425000000000000000e+01 4.675000000000000000e+01
4.600000000000000000e+01 6.825923076923077133e+02 2.883411865234375000e+02 2.570281982421875000e+00 0.000000000000000000e+00 0.000000000000000000e+00 3.082171630859375000e+03 3.760119438171386719e+00 4.000000000000000000e+00 4.008521728515625000e+02 -9.375000000000000000e+01 4.675000000000000000e+01
4.900000000000000000e+01 6.992461538461539021e+02 3.352330322265625000e+02 2.593750000000000000e+00 0.000000000000000000e+00 0.000000000000000000e+00 3.058227050781250000e+03 3.673784017562866211e+00 4.000000000000000000e+00 4.038409423828125000e+02 -9.275000000000000000e+01 4.675000000000000000e+01
4.100000000000000000e+01 7.446384615384614563e+02 3.300095520019531250e+02 2.605468750000000000e+00 0.000000000000000000e+00 0.000000000000000000e+00 3.046254882812500000e+03 3.606956243515014648e+00 3.000000000000000000e+00 3.908229370117187500e+02 -9.225000000000000000e+01 4.675000000000000000e+01
5.800000000000000000e+01 7.347769230769227988e+02 4.130571289062500000e+02 3.930297851562500000e+00 0.000000000000000000e+00 0.000000000000000000e+00 3.139449218750000000e+03 9.117667675018310547e-01 4.000000000000000000e+00 2.640792541503906250e+02 -8.925000000000000000e+01 4.675000000000000000e+01
4.900000000000000000e+01 7.280923076923080544e+02 4.067303161621093750e+02 4.132080078125000000e+00 0.000000000000000000e+00 0.000000000000000000e+00 3.121290527343750000e+03 9.058809280395507812e-01 4.000000000000000000e+00 2.686966857910156250e+02 -8.875000000000000000e+01 4.675000000000000000e+01
6.700000000000000000e+01 9.690461538461539703e+02 4.328831787109375000e+02 2.970458984375000000e+00 0.000000000000000000e+00 2.352941185235977173e-01 2.841294433593750000e+03 8.825674057006835938e-01 4.000000000000000000e+00 3.655201110839843750e+02 -8.375000000000000000e+01 4.675000000000000000e+01
6.900000000000000000e+01 9.164076923076916046e+02 4.158787231445312500e+02 2.662506103515625000e+00 0.000000000000000000e+00 2.941176593303680420e-01 2.814278076171875000e+03 8.899357914924621582e-01 4.000000000000000000e+00 4.521817932128906250e+02 -8.325000000000000000e+01 4.675000000000000000e+01
6.600000000000000000e+01 8.785153846153850736e+02 4.012279968261718750e+02 2.354553222656250000e+00 0.000000000000000000e+00 5.294117927551269531e-01 2.787261718750000000e+03 8.852728605270385742e-01 4.000000000000000000e+00 4.447933654785156250e+02 -8.275000000000000000e+01 4.675000000000000000e+01
5.400000000000000000e+01 8.611538461538465299e+02 4.027811889648437500e+02 2.106048583984375000e+00 0.000000000000000000e+00 0.000000000000000000e+00 2.767356201171875000e+03 8.864263892173767090e-01 4.000000000000000000e+00 4.695720825195312500e+02 -8.225000000000000000e+01 4.675000000000000000e+01
6.800000000000000000e+01 8.128384615384615017e+02 4.367919311523437500e+02 1.727874755859375000e+00 0.000000000000000000e+00 0.000000000000000000e+00 2.741767333984375000e+03 1.117929935455322266e+00 4.000000000000000000e+00 4.045057678222656250e+02 -8.125000000000000000e+01 4.675000000000000000e+01
5.700000000000000000e+01 8.405923076923073722e+02 4.677199707031250000e+02 1.463745117187500000e+00 0.000000000000000000e+00 0.000000000000000000e+00 2.715852539062500000e+03 9.184846282005310059e-01 4.000000000000000000e+00 3.155139770507812500e+02 -8.025000000000000000e+01 4.675000000000000000e+01
6.200000000000000000e+01 8.931000000000003638e+02 4.712270202636718750e+02 1.426727294921875000e+00 0.000000000000000000e+00 0.000000000000000000e+00 2.702623779296875000e+03 9.096713662147521973e-01 4.000000000000000000e+00 2.987721557617187500e+02 -7.975000000000000000e+01 4.675000000000000000e+01
6.900000000000000000e+01 9.214461538461545160e+02 4.907064514160156250e+02 1.389709472656250000e+00 0.000000000000000000e+00 0.000000000000000000e+00 2.689394775390625000e+03 9.118303060531616211e-01 4.000000000000000000e+00 3.305902099609375000e+02 -7.925000000000000000e+01 4.675000000000000000e+01
6.000000000000000000e+01 9.635461538461532882e+02 4.880732116699218750e+02 1.352691650390625000e+00 0.000000000000000000e+00 0.000000000000000000e+00 2.676166015625000000e+03 8.984312415122985840e-01 4.000000000000000000e+00 3.049370117187500000e+02 -7.875000000000000000e+01 4.675000000000000000e+01
6.900000000000000000e+01 9.318692307692306258e+02 4.693503723144531250e+02 1.391296386718750000e+00 0.000000000000000000e+00 0.000000000000000000e+00 2.659817626953125000e+03 8.927317857742309570e-01 4.000000000000000000e+00 3.582673339843750000e+02 -7.825000000000000000e+01 4.675000000000000000e+01
6.900000000000000000e+01 9.144999999999998863e+02 4.355164489746093750e+02 1.429870605468750000e+00 0.000000000000000000e+00 0.000000000000000000e+00 2.643469238281250000e+03 8.949347138404846191e-01 4.000000000000000000e+00 3.617947998046875000e+02 -7.775000000000000000e+01 4.675000000000000000e+01
6.900000000000000000e+01 9.227692307692303757e+02 4.271776123046875000e+02 1.468475341796875000e+00 0.000000000000000000e+00 0.000000000000000000e+00 2.627120849609375000e+03 8.940969705581665039e-01 4.000000000000000000e+00 3.711219177246093750e+02 -7.725000000000000000e+01 4.675000000000000000e+01
5.800000000000000000e+01 9.438615384615376342e+02 4.856557617187500000e+02 1.459716796875000000e+00 0.000000000000000000e+00 0.000000000000000000e+00 2.585633300781250000e+03 8.893709182739257812e-01 4.000000000000000000e+00 2.651846923828125000e+02 -7.625000000000000000e+01 4.675000000000000000e+01
5.200000000000000000e+01 1.073792307692308214e+03 5.254863891601562500e+02 1.399414062500000000e+00 0.000000000000000000e+00 0.000000000000000000e+00 2.538870849609375000e+03 8.806145191192626953e-01 4.000000000000000000e+00 3.045661010742187500e+02 -7.525000000000000000e+01 4.675000000000000000e+01
4.800000000000000000e+01 9.884461538461540613e+02 5.388836669921875000e+02 1.329589843750000000e+00 0.000000000000000000e+00 0.000000000000000000e+00 2.515255371093750000e+03 8.776153922080993652e-01 4.000000000000000000e+00 4.685829162597656250e+02 -7.475000000000000000e+01 4.675000000000000000e+01
6.600000000000000000e+01 9.488000000000000682e+02 5.406483154296875000e+02 1.220123291015625000e+00 0.000000000000000000e+00 0.000000000000000000e+00 2.491405517578125000e+03 8.745907545089721680e-01 4.000000000000000000e+00 5.654186401367187500e+02 -7.425000000000000000e+01 4.675000000000000000e+01
6.000000000000000000e+01 8.979846153846157222e+02 5.190686645507812500e+02 1.110626220703125000e+00 0.000000000000000000e+00 0.000000000000000000e+00 2.467555908203125000e+03 8.745860457420349121e-01 4.000000000000000000e+00 4.318895874023437500e+02 -7.375000000000000000e+01 4.675000000000000000e+01
6.400000000000000000e+01 1.018176923076922890e+03 4.773358459472656250e+02 1.001159667968750000e+00 0.000000000000000000e+00 0.000000000000000000e+00 2.443706054687500000e+03 8.760065436363220215e-01 4.000000000000000000e+00 3.847901306152343750e+02 -7.325000000000000000e+01 4.675000000000000000e+01
6.600000000000000000e+01 1.142976923076922958e+03 4.758912353515625000e+02 8.994140625000000000e-01 0.000000000000000000e+00 0.000000000000000000e+00 2.429198974609375000e+03 8.778076171875000000e-01 4.000000000000000000e+00 2.019501953125000000e+02 -7.275000000000000000e+01 4.675000000000000000e+01
6.600000000000000000e+01 1.207384615384616609e+03 4.993207702636718750e+02 6.148376464843750000e-01 0.000000000000000000e+00 0.000000000000000000e+00 2.419132324218750000e+03 8.665437698364257812e-01 4.000000000000000000e+00 5.514144287109375000e+02 -7.025000000000000000e+01 4.675000000000000000e+01
6.500000000000000000e+01 1.058792307692307986e+03 5.000729980468750000e+02 6.213073730468750000e-01 0.000000000000000000e+00 0.000000000000000000e+00 2.431188476562500000e+03 8.714303970336914062e-01 4.000000000000000000e+00 3.356127929687500000e+02 -6.975000000000000000e+01 4.675000000000000000e+01
6.800000000000000000e+01 1.073930769230769329e+03 5.192227172851562500e+02 6.737060546875000000e-01 0.000000000000000000e+00 0.000000000000000000e+00 2.449066406250000000e+03 8.746020197868347168e-01 4.000000000000000000e+00 3.294878845214843750e+02 -6.925000000000000000e+01 4.675000000000000000e+01
6.500000000000000000e+01 1.097538461538461206e+03 5.209962768554687500e+02 8.638000488281250000e-01 0.000000000000000000e+00 0.000000000000000000e+00 2.484409179687500000e+03 8.783323168754577637e-01 4.000000000000000000e+00 2.988483581542968750e+02 -6.875000000000000000e+01 4.675000000000000000e+01
6.700000000000000000e+01 1.070507692307692423e+03 5.021197509765625000e+02 1.053894042968750000e+00 0.000000000000000000e+00 0.000000000000000000e+00 2.519751953125000000e+03 1.936533093452453613e+00 4.000000000000000000e+00 2.072113342285156250e+02 -6.825000000000000000e+01 4.675000000000000000e+01
4.000000000000000000e+01 1.206023076923076360e+03 4.939739379882812500e+02 1.243988037109375000e+00 0.000000000000000000e+00 0.000000000000000000e+00 2.555094726562500000e+03 1.957767486572265625e+00 3.000000000000000000e+00 1.703232879638671875e+02 -6.775000000000000000e+01 4.675000000000000000e+01
4.200000000000000000e+01 1.231400000000000091e+03 5.112060852050781250e+02 1.530609130859375000e+00 0.000000000000000000e+00 0.000000000000000000e+00 2.592951171875000000e+03 8.693246245384216309e-01 3.000000000000000000e+00 3.545072631835937500e+02 -6.725000000000000000e+01 4.675000000000000000e+01
5.000000000000000000e+01 1.263753846153846098e+03 5.146528930664062500e+02 1.913787841796875000e+00 0.000000000000000000e+00 0.000000000000000000e+00 2.633321289062500000e+03 8.592669963836669922e-01 4.000000000000000000e+00 4.314564514160156250e+02 -6.675000000000000000e+01 4.675000000000000000e+01
4.700000000000000000e+01 1.258607692307692787e+03 4.833648071289062500e+02 2.296966552734375000e+00 0.000000000000000000e+00 0.000000000000000000e+00 2.673691406250000000e+03 2.161656618118286133e+00 4.000000000000000000e+00 1.586210479736328125e+02 -6.625000000000000000e+01 4.675000000000000000e+01
4.200000000000000000e+01 1.222330769230769647e+03 4.400264587402343750e+02 2.680175781250000000e+00 0.000000000000000000e+00 0.000000000000000000e+00 2.714061523437500000e+03 2.206472158432006836e+00 3.000000000000000000e+00 5.892361068725585938e+01 -6.575000000000000000e+01 4.675000000000000000e+01
5.000000000000000000e+01 1.289930769230769783e+03 4.446097412109375000e+02 3.089630126953125000e+00 0.000000000000000000e+00 0.000000000000000000e+00 2.680614990234375000e+03 2.233688831329345703e+00 4.000000000000000000e+00 6.647561645507812500e+01 -6.525000000000000000e+01 4.675000000000000000e+01
4.000000000000000000e+00 5.285769230769230944e+02 2.473729858398437500e+02 3.304229736328125000e+00 0.000000000000000000e+00 6.470588445663452148e-01 3.240760986328125000e+03 3.648505687713623047e+00 1.000000000000000000e+00 5.601644897460937500e+02 -9.975000000000000000e+01 4.725000000000000000e+01
4.000000000000000000e+00 5.944538461538463707e+02 2.899802551269531250e+02 3.260314941406250000e+00 0.000000000000000000e+00 1.470588207244873047e+00 3.229199462890625000e+03 3.773653268814086914e+00 1.000000000000000000e+00 2.971401672363281250e+02 -9.725000000000000000e+01 4.725000000000000000e+01
6.000000000000000000e+00 6.257000000000000455e+02 2.808263854980468750e+02 3.071807861328125000e+00 0.000000000000000000e+00 8.235294222831726074e-01 3.193948242187500000e+03 3.809137582778930664e+00 1.000000000000000000e+00 2.653315124511718750e+02 -9.675000000000000000e+01 4.725000000000000000e+01
1.500000000000000000e+01 6.545538461538460524e+02 3.037971191406250000e+02 2.694824218750000000e+00 0.000000000000000000e+00 1.352941155433654785e+00 3.123446044921875000e+03 3.708456039428710938e+00 1.000000000000000000e+00 4.435945129394531250e+02 -9.575000000000000000e+01 4.725000000000000000e+01
6.000000000000000000e+01 6.735384615384616609e+02 3.310973205566406250e+02 2.532562255859375000e+00 0.000000000000000000e+00 0.000000000000000000e+00 3.087895507812500000e+03 3.689295530319213867e+00 4.000000000000000000e+00 4.684996643066406250e+02 -9.525000000000000000e+01 4.725000000000000000e+01
2.200000000000000000e+01 7.102615384615387484e+02 2.804486083984375000e+02 2.072082519531250000e+00 0.000000000000000000e+00 0.000000000000000000e+00 2.980944335937500000e+03 3.642541170120239258e+00 3.000000000000000000e+00 3.934663085937500000e+02 -9.375000000000000000e+01 4.725000000000000000e+01
4.300000000000000000e+01 7.093846153846154721e+02 2.958728332519531250e+02 2.078948974609375000e+00 0.000000000000000000e+00 0.000000000000000000e+00 2.965956787109375000e+03 3.634264945983886719e+00 3.000000000000000000e+00 4.081806030273437500e+02 -9.325000000000000000e+01 4.725000000000000000e+01
4.900000000000000000e+01 7.032615384615384073e+02 3.018532409667968750e+02 2.085815429687500000e+00 0.000000000000000000e+00 0.000000000000000000e+00 2.950969238281250000e+03 3.581420898437500000e+00 4.000000000000000000e+00 3.958314819335937500e+02 -9.275000000000000000e+01 4.725000000000000000e+01
5.500000000000000000e+01 7.531307692307691468e+02 3.306109008789062500e+02 2.092651367187500000e+00 0.000000000000000000e+00 0.000000000000000000e+00 2.935981689453125000e+03 3.231262683868408203e+00 4.000000000000000000e+00 4.340141906738281250e+02 -9.225000000000000000e+01 4.725000000000000000e+01
6.100000000000000000e+01 1.044669230769230808e+03 4.357940979003906250e+02 2.536437988281250000e+00 0.000000000000000000e+00 0.000000000000000000e+00 2.747424072265625000e+03 8.644177317619323730e-01 4.000000000000000000e+00 5.079204101562500000e+02 -8.425000000000000000e+01 4.725000000000000000e+01
6.200000000000000000e+01 1.010361538461538657e+03 4.179232482910156250e+02 2.233978271484375000e+00 0.000000000000000000e+00 5.882352963089942932e-02 2.721814697265625000e+03 8.551677465438842773e-01 4.000000000000000000e+00 4.875455017089843750e+02 -8.375000000000000000e+01 4.725000000000000000e+01
5.700000000000000000e+01 9.385307692307688967e+02 4.078136291503906250e+02 1.931488037109375000e+00 0.000000000000000000e+00 0.000000000000000000e+00 2.696205322265625000e+03 8.591765165328979492e-01 4.000000000000000000e+00 5.041035766601562500e+02 -8.325000000000000000e+01 4.725000000000000000e+01
6.000000000000000000e+01 8.782999999999997272e+02 4.050295104980468750e+02 1.628997802734375000e+00 0.000000000000000000e+00 0.000000000000000000e+00 2.670595947265625000e+03 8.685788512229919434e-01 4.000000000000000000e+00 4.754668579101562500e+02 -8.275000000000000000e+01 4.725000000000000000e+01
5.700000000000000000e+01 8.124461538461538339e+02 4.140960998535156250e+02 1.392578125000000000e+00 0.000000000000000000e+00 0.000000000000000000e+00 2.652083984375000000e+03 8.792620897293090820e-01 4.000000000000000000e+00 4.404003601074218750e+02 -8.225000000000000000e+01 4.725000000000000000e+01
6.600000000000000000e+01 8.529461538461538339e+02 4.332727050781250000e+02 1.051910400390625000e+00 0.000000000000000000e+00 0.000000000000000000e+00 2.629255126953125000e+03 8.813276886940002441e-01 4.000000000000000000e+00 3.977248840332031250e+02 -8.125000000000000000e+01 4.725000000000000000e+01
6.400000000000000000e+01 8.348846153846158131e+02 4.129641418457031250e+02 8.815612792968750000e-01 0.000000000000000000e+00 0.000000000000000000e+00 2.617840820312500000e+03 8.939359188079833984e-01 4.000000000000000000e+00 4.101879882812500000e+02 -8.075000000000000000e+01 4.725000000000000000e+01
5.100000000000000000e+01 8.128538461538462343e+02 3.465453186035156250e+02 7.962036132812500000e-01 0.000000000000000000e+00 0.000000000000000000e+00 2.594106933593750000e+03 8.893766999244689941e-01 4.000000000000000000e+00 3.486355590820312500e+02 -7.975000000000000000e+01 4.725000000000000000e+01
5.600000000000000000e+01 8.597769230769232536e+02 3.836114501953125000e+02 7.717895507812500000e-01 0.000000000000000000e+00 0.000000000000000000e+00 2.582175537109375000e+03 8.913440704345703125e-01 4.000000000000000000e+00 2.873645324707031250e+02 -7.925000000000000000e+01 4.725000000000000000e+01
6.700000000000000000e+01 9.006307692307692605e+02 4.513585205078125000e+02 8.367614746093750000e-01 0.000000000000000000e+00 0.000000000000000000e+00 2.538529541015625000e+03 8.713122010231018066e-01 4.000000000000000000e+00 3.855780639648437500e+02 -7.775000000000000000e+01 4.725000000000000000e+01
6.700000000000000000e+01 9.143615384615385437e+02 4.696389465332031250e+02 9.099426269531250000e-01 0.000000000000000000e+00 0.000000000000000000e+00 2.505026367187500000e+03 8.673999905586242676e-01 4.000000000000000000e+00 3.683796386718750000e+02 -7.675000000000000000e+01 4.725000000000000000e+01
6.400000000000000000e+01 9.447769230769229125e+02 4.909011840820312500e+02 8.897399902343750000e-01 0.000000000000000000e+00 0.000000000000000000e+00 2.482014892578125000e+03 8.614479303359985352e-01 4.000000000000000000e+00 4.209559631347656250e+02 -7.625000000000000000e+01 4.725000000000000000e+01
7.200000000000000000e+01 9.800846153846151765e+02 5.049811096191406250e+02 8.695373535156250000e-01 0.000000000000000000e+00 0.000000000000000000e+00 2.459003173828125000e+03 8.586788773536682129e-01 4.000000000000000000e+00 3.890644226074218750e+02 -7.575000000000000000e+01 4.725000000000000000e+01
7.000000000000000000e+01 1.007123076923077178e+03 5.121181640625000000e+02 8.493041992187500000e-01 0.000000000000000000e+00 0.000000000000000000e+00 2.435991455078125000e+03 8.547609448432922363e-01 4.000000000000000000e+00 4.071577148437500000e+02 -7.525000000000000000e+01 4.725000000000000000e+01
4.100000000000000000e+01 9.730538461538460524e+02 5.143192138671875000e+02 7.924194335937500000e-01 0.000000000000000000e+00 0.000000000000000000e+00 2.413423828125000000e+03 8.563928604125976562e-01 3.000000000000000000e+00 3.960454101562500000e+02 -7.475000000000000000e+01 4.725000000000000000e+01
6.400000000000000000e+01 9.274230769230764508e+02 5.041289978027343750e+02 6.988220214843750000e-01 0.000000000000000000e+00 0.000000000000000000e+00 2.391300292968750000e+03 8.587362766265869141e-01 4.000000000000000000e+00 4.463867797851562500e+02 -7.425000000000000000e+01 4.725000000000000000e+01
4.900000000000000000e+01 9.696461538461537657e+02 4.399957275390625000e+02 5.116271972656250000e-01 0.000000000000000000e+00 0.000000000000000000e+00 2.347053222656250000e+03 8.642186522483825684e-01 4.000000000000000000e+00 4.327992248535156250e+02 -7.325000000000000000e+01 4.725000000000000000e+01
6.800000000000000000e+01 1.171684615384614744e+03 4.368004455566406250e+02 3.402709960937500000e-01 0.000000000000000000e+00 0.000000000000000000e+00 2.322759277343750000e+03 8.510531187057495117e-01 4.000000000000000000e+00 3.783077697753906250e+02 -7.225000000000000000e+01 4.725000000000000000e+01
6.900000000000000000e+01 1.405961538461538794e+03 4.194351806640625000e+02 2.557373046875000000e-01 0.000000000000000000e+00 0.000000000000000000e+00 2.312037597656250000e+03 8.666385412216186523e-01 4.000000000000000000e+00 6.371687011718750000e+02 -7.175000000000000000e+01 4.725000000000000000e+01
6.500000000000000000e+01 1.516692307692307168e+03 4.642279663085937500e+02 1.712036132812500000e-01 0.000000000000000000e+00 0.000000000000000000e+00 2.301315673828125000e+03 1.458536028861999512e+00 4.000000000000000000e+00 7.069932861328125000e+02 -7.125000000000000000e+01 4.725000000000000000e+01
6.000000000000000000e+01 1.068992307692308032e+03 5.042595520019531250e+02 2.120971679687500000e-01 0.000000000000000000e+00 0.000000000000000000e+00 2.334805175781250000e+03 8.628196716308593750e-01 4.000000000000000000e+00 4.391430358886718750e+02 -6.975000000000000000e+01 4.725000000000000000e+01
4.400000000000000000e+01 1.091561538461538476e+03 4.795522155761718750e+02 2.700805664062500000e-01 0.000000000000000000e+00 0.000000000000000000e+00 2.351626464843750000e+03 8.640120625495910645e-01 3.000000000000000000e+00 2.346651763916015625e+02 -6.925000000000000000e+01 4.725000000000000000e+01
7.100000000000000000e+01 1.105092307692307713e+03 5.009942626953125000e+02 4.610900878906250000e-01 0.000000000000000000e+00 0.000000000000000000e+00 2.385421875000000000e+03 8.686634898185729980e-01 4.000000000000000000e+00 2.138042907714843750e+02 -6.875000000000000000e+01 4.725000000000000000e+01
4.500000000000000000e+01 1.183815384615384573e+03 5.125113525390625000e+02 6.520996093750000000e-01 0.000000000000000000e+00 0.000000000000000000e+00 2.419217285156250000e+03 8.714690208435058594e-01 4.000000000000000000e+00 2.268648529052734375e+02 -6.825000000000000000e+01 4.725000000000000000e+01
5.300000000000000000e+01 1.188453846153845916e+03 5.187390136718750000e+02 8.431091308593750000e-01 0.000000000000000000e+00 0.000000000000000000e+00 2.453012939453125000e+03 8.615052700042724609e-01 4.000000000000000000e+00 2.752957763671875000e+02 -6.775000000000000000e+01 4.725000000000000000e+01
6.900000000000000000e+01 1.135869230769230853e+03 5.112964782714843750e+02 1.525146484375000000e+00 0.000000000000000000e+00 0.000000000000000000e+00 2.530219970703125000e+03 9.722833633422851562e-01 4.000000000000000000e+00 5.341102294921875000e+02 -6.675000000000000000e+01 4.725000000000000000e+01
6.700000000000000000e+01 1.149669230769231035e+03 4.513184814453125000e+02 1.916168212890625000e+00 0.000000000000000000e+00 0.000000000000000000e+00 2.570426513671875000e+03 1.132181882858276367e+00 4.000000000000000000e+00 4.215828247070312500e+02 -6.625000000000000000e+01 4.725000000000000000e+01
7.000000000000000000e+01 1.126253846153846780e+03 4.049521484375000000e+02 2.307159423828125000e+00 0.000000000000000000e+00 0.000000000000000000e+00 2.610632812500000000e+03 1.971025943756103516e+00 4.000000000000000000e+00 1.119939270019531250e+02 -6.575000000000000000e+01 4.725000000000000000e+01
5.800000000000000000e+01 1.381523076923077724e+03 5.982340698242187500e+02 5.068115234375000000e+00 0.000000000000000000e+00 0.000000000000000000e+00 2.257604492187500000e+03 1.473722338676452637e+00 4.000000000000000000e+00 1.174912033081054688e+02 -5.325000000000000000e+01 4.725000000000000000e+01
7.000000000000000000e+00 5.390461538461537430e+02 2.462920227050781250e+02 2.950958251953125000e+00 0.000000000000000000e+00 1.176470592617988586e-01 3.162782714843750000e+03 3.633526086807250977e+00 1.000000000000000000e+00 4.533055114746093750e+02 -9.875000000000000000e+01 4.775000000000000000e+01
5.500000000000000000e+01 6.288461538461538112e+02 2.769833068847656250e+02 2.056335449218750000e+00 0.000000000000000000e+00 3.529411852359771729e-01 2.989865234375000000e+03 3.631845474243164062e+00 4.000000000000000000e+00 3.957941284179687500e+02 -9.525000000000000000e+01 4.775000000000000000e+01
4.900000000000000000e+01 6.702230769230770875e+02 2.818546752929687500e+02 1.895507812500000000e+00 0.000000000000000000e+00 0.000000000000000000e+00 2.953149169921875000e+03 3.640232801437377930e+00 4.000000000000000000e+00 4.087915954589843750e+02 -9.475000000000000000e+01 4.775000000000000000e+01
5.500000000000000000e+01 6.885538461538466208e+02 2.868981933593750000e+02 1.734680175781250000e+00 0.000000000000000000e+00 0.000000000000000000e+00 2.916432861328125000e+03 3.297451972961425781e+00 4.000000000000000000e+00 4.250120849609375000e+02 -9.425000000000000000e+01 4.775000000000000000e+01
6.200000000000000000e+01 7.082230769230770875e+02 2.757444763183593750e+02 1.573852539062500000e+00 0.000000000000000000e+00 0.000000000000000000e+00 2.879716796875000000e+03 3.065925121307373047e+00 4.000000000000000000e+00 4.117576904296875000e+02 -9.375000000000000000e+01 4.775000000000000000e+01
5.400000000000000000e+01 7.210076923076928779e+02 2.795082397460937500e+02 1.575866699218750000e+00 0.000000000000000000e+00 0.000000000000000000e+00 2.861714111328125000e+03 9.306757450103759766e-01 4.000000000000000000e+00 4.182876586914062500e+02 -9.325000000000000000e+01 4.775000000000000000e+01
4.200000000000000000e+01 7.221846153846155403e+02 2.791447753906250000e+02 1.577850341796875000e+00 0.000000000000000000e+00 0.000000000000000000e+00 2.843711425781250000e+03 2.945314407348632812e+00 3.000000000000000000e+00 4.110904235839843750e+02 -9.275000000000000000e+01 4.775000000000000000e+01
4.300000000000000000e+01 7.735538461538460524e+02 3.231615295410156250e+02 1.579833984375000000e+00 0.000000000000000000e+00 0.000000000000000000e+00 2.825708740234375000e+03 1.046831488609313965e+00 3.000000000000000000e+00 4.518666687011718750e+02 -9.225000000000000000e+01 4.775000000000000000e+01
5.500000000000000000e+01 8.099307692307691013e+02 3.381897583007812500e+02 1.638488769531250000e+00 0.000000000000000000e+00 0.000000000000000000e+00 2.816566406250000000e+03 8.715430498123168945e-01 4.000000000000000000e+00 4.539009399414062500e+02 -9.175000000000000000e+01 4.775000000000000000e+01
5.300000000000000000e+01 8.195307692307695788e+02 3.576873779296875000e+02 1.867065429687500000e+00 0.000000000000000000e+00 4.705882370471954346e-01 2.834005615234375000e+03 8.565191030502319336e-01 4.000000000000000000e+00 5.015929870605468750e+02 -9.125000000000000000e+01 4.775000000000000000e+01
5.000000000000000000e+01 9.768846153846156994e+02 3.603787841796875000e+02 1.794464111328125000e+00 0.000000000000000000e+00 0.000000000000000000e+00 2.626537597656250000e+03 8.470058441162109375e-01 4.000000000000000000e+00 4.576498413085937500e+02 -8.425000000000000000e+01 4.775000000000000000e+01
5.200000000000000000e+01 9.597230769230772012e+02 3.880208129882812500e+02 1.497467041015625000e+00 0.000000000000000000e+00 0.000000000000000000e+00 2.602334960937500000e+03 8.421140313148498535e-01 4.000000000000000000e+00 4.691658020019531250e+02 -8.375000000000000000e+01 4.775000000000000000e+01
4.700000000000000000e+01 9.212461538461541295e+02 3.994921875000000000e+02 1.200439453125000000e+00 0.000000000000000000e+00 0.000000000000000000e+00 2.578132568359375000e+03 8.492478728294372559e-01 4.000000000000000000e+00 4.470598754882812500e+02 -8.325000000000000000e+01 4.775000000000000000e+01
4.100000000000000000e+01 8.539461538461536065e+02 4.066480407714843750e+02 9.034118652343750000e-01 0.000000000000000000e+00 0.000000000000000000e+00 2.553930175781250000e+03 8.617883920669555664e-01 3.000000000000000000e+00 4.053765563964843750e+02 -8.275000000000000000e+01 4.775000000000000000e+01
5.700000000000000000e+01 8.388769230769232763e+02 4.242979431152343750e+02 5.275268554687500000e-01 0.000000000000000000e+00 1.176470592617988586e-01 2.526777343750000000e+03 8.642333149909973145e-01 4.000000000000000000e+00 3.866573486328125000e+02 -8.175000000000000000e+01 4.775000000000000000e+01
6.400000000000000000e+01 8.551692307692306940e+02 4.011717834472656250e+02 3.759460449218750000e-01 0.000000000000000000e+00 0.000000000000000000e+00 2.516743164062500000e+03 8.689260482788085938e-01 4.000000000000000000e+00 3.657553100585937500e+02 -8.125000000000000000e+01 4.775000000000000000e+01
5.700000000000000000e+01 8.319307692307688740e+02 3.446793212890625000e+02 2.243652343750000000e-01 0.000000000000000000e+00 0.000000000000000000e+00 2.506708740234375000e+03 8.787941336631774902e-01 4.000000000000000000e+00 3.496452026367187500e+02 -8.075000000000000000e+01 4.775000000000000000e+01
4.900000000000000000e+01 8.264076923076924004e+02 2.664559936523437500e+02 1.775817871093750000e-01 0.000000000000000000e+00 0.000000000000000000e+00 2.496224609375000000e+03 8.826222419738769531e-01 4.000000000000000000e+00 3.043401794433593750e+02 -8.025000000000000000e+01 4.775000000000000000e+01
4.600000000000000000e+01 7.835384615384620020e+02 2.319402770996093750e+02 1.657104492187500000e-01 0.000000000000000000e+00 0.000000000000000000e+00 2.485590332031250000e+03 1.304239869117736816e+00 4.000000000000000000e+00 2.043472747802734375e+02 -7.975000000000000000e+01 4.775000000000000000e+01
6.400000000000000000e+01 9.128076923076927187e+02 4.064908752441406250e+02 1.419677734375000000e-01 0.000000000000000000e+00 0.000000000000000000e+00 2.464321777343750000e+03 8.646889925003051758e-01 4.000000000000000000e+00 2.978438415527343750e+02 -7.875000000000000000e+01 4.775000000000000000e+01
5.500000000000000000e+01 8.903230769230772239e+02 4.593966979980468750e+02 2.436218261718750000e-01 0.000000000000000000e+00 0.000000000000000000e+00 2.433589599609375000e+03 8.507869839668273926e-01 4.000000000000000000e+00 3.342947082519531250e+02 -7.775000000000000000e+01 4.775000000000000000e+01
4.900000000000000000e+01 9.036615384615387256e+02 4.668569641113281250e+02 2.944641113281250000e-01 0.000000000000000000e+00 0.000000000000000000e+00 2.418223632812500000e+03 8.434401154518127441e-01 4.000000000000000000e+00 3.651304931640625000e+02 -7.725000000000000000e+01 4.775000000000000000e+01
3.200000000000000000e+01 9.186846153846156540e+02 4.749416503906250000e+02 3.300170898437500000e-01 0.000000000000000000e+00 0.000000000000000000e+00 2.401038574218750000e+03 8.388383388519287109e-01 3.000000000000000000e+00 3.790294189453125000e+02 -7.675000000000000000e+01 4.775000000000000000e+01
6.500000000000000000e+01 9.352230769230767464e+02 4.928973083496093750e+02 3.094787597656250000e-01 0.000000000000000000e+00 0.000000000000000000e+00 2.355754150390625000e+03 8.420259952545166016e-01 4.000000000000000000e+00 4.417263793945312500e+02 -7.575000000000000000e+01 4.775000000000000000e+01
6.200000000000000000e+01 9.342307692307696243e+02 4.861619262695312500e+02 2.552490234375000000e-01 0.000000000000000000e+00 0.000000000000000000e+00 2.311592285156250000e+03 8.365178704261779785e-01 4.000000000000000000e+00 4.818663024902343750e+02 -7.475000000000000000e+01 4.775000000000000000e+01
6.600000000000000000e+01 9.411923076923077360e+02 4.759267578125000000e+02 1.775207519531250000e-01 0.000000000000000000e+00 5.882353186607360840e-01 2.291194824218750000e+03 8.313346505165100098e-01 4.000000000000000000e+00 5.236082153320312500e+02 -7.425000000000000000e+01 4.775000000000000000e+01
6.100000000000000000e+01 9.665692307692303302e+02 4.627160644531250000e+02 9.979248046875000000e-02 0.000000000000000000e+00 5.882353186607360840e-01 2.270797607421875000e+03 8.330369591712951660e-01 4.000000000000000000e+00 4.762137451171875000e+02 -7.375000000000000000e+01 4.775000000000000000e+01
6.200000000000000000e+01 9.859153846153842551e+02 4.461420288085937500e+02 -4.977416992187500000e-02 0.000000000000000000e+00 5.882352963089942932e-02 2.237762939453125000e+03 8.583158850669860840e-01 4.000000000000000000e+00 3.285252075195312500e+02 -7.275000000000000000e+01 4.775000000000000000e+01
6.100000000000000000e+01 1.082484615384615154e+03 4.646333923339843750e+02 -1.196594238281250000e-01 0.000000000000000000e+00 0.000000000000000000e+00 2.227712402343750000e+03 8.425759077072143555e-01 4.000000000000000000e+00 4.381774291992187500e+02 -7.225000000000000000e+01 4.775000000000000000e+01
6.700000000000000000e+01 1.278784615384614881e+03 5.230244750976562500e+02 -1.895446777343750000e-01 0.000000000000000000e+00 0.000000000000000000e+00 2.217662109375000000e+03 1.243892550468444824e+00 4.000000000000000000e+00 5.428207397460937500e+02 -7.175000000000000000e+01 4.775000000000000000e+01
6.300000000000000000e+01 1.303415384615384710e+03 5.600809326171875000e+02 -2.594299316406250000e-01 9.999999776482582092e-03 0.000000000000000000e+00 2.207611572265625000e+03 1.892581343650817871e+00 4.000000000000000000e+00 8.033743896484375000e+02 -7.125000000000000000e+01 4.775000000000000000e+01
6.300000000000000000e+01 1.360030769230769238e+03 5.550820312500000000e+02 -2.386474609375000000e-01 9.999999776482582092e-03 0.000000000000000000e+00 2.217881835937500000e+03 1.430768847465515137e+00 4.000000000000000000e+00 8.515111083984375000e+02 -7.075000000000000000e+01 4.775000000000000000e+01
6.200000000000000000e+01 1.026223076923077087e+03 5.339988403320312500e+02 -2.178955078125000000e-01 0.000000000000000000e+00 0.000000000000000000e+00 2.228151855468750000e+03 8.193493485450744629e-01 4.000000000000000000e+00 3.814985961914062500e+02 -7.025000000000000000e+01 4.775000000000000000e+01
6.700000000000000000e+01 1.127392307692307213e+03 4.643101196289062500e+02 5.838012695312500000e-02 0.000000000000000000e+00 2.352941185235977173e-01 2.286434814453125000e+03 8.545489907264709473e-01 4.000000000000000000e+00 2.125028533935546875e+02 -6.875000000000000000e+01 4.775000000000000000e+01
5.900000000000000000e+01 1.222253846153845871e+03 4.857517700195312500e+02 2.503051757812500000e-01 0.000000000000000000e+00 0.000000000000000000e+00 2.318682861328125000e+03 8.383757472038269043e-01 4.000000000000000000e+00 4.461314086914062500e+02 -6.825000000000000000e+01 4.775000000000000000e+01
7.300000000000000000e+01 1.214476923076922958e+03 5.099122924804687500e+02 4.422302246093750000e-01 0.000000000000000000e+00 0.000000000000000000e+00 2.350930908203125000e+03 8.261673450469970703e-01 4.000000000000000000e+00 4.123943786621093750e+02 -6.775000000000000000e+01 4.775000000000000000e+01
6.900000000000000000e+01 1.092699999999999591e+03 5.226434936523437500e+02 7.376403808593750000e-01 0.000000000000000000e+00 0.000000000000000000e+00 2.387076171875000000e+03 8.245337009429931641e-01 4.000000000000000000e+00 3.018760375976562500e+02 -6.725000000000000000e+01 4.775000000000000000e+01
2.900000000000000000e+01 1.115076923076923094e+03 5.218125000000000000e+02 1.136474609375000000e+00 0.000000000000000000e+00 0.000000000000000000e+00 2.427118896484375000e+03 8.309354186058044434e-01 3.000000000000000000e+00 2.329541320800781250e+02 -6.675000000000000000e+01 4.775000000000000000e+01
2.100000000000000000e+01 1.467961538461537430e+03 5.093490600585937500e+02 4.296600341796875000e+00 0.000000000000000000e+00 0.000000000000000000e+00 2.262345947265625000e+03 1.836286544799804688e+00 3.000000000000000000e+00 1.876552581787109375e+02 -5.775000000000000000e+01 4.775000000000000000e+01
4.900000000000000000e+01 1.607184615384615199e+03 5.522260742187500000e+02 4.346923828125000000e+00 0.000000000000000000e+00 0.000000000000000000e+00 2.288502929687500000e+03 1.993871450424194336e+00 4.000000000000000000e+00 2.181236419677734375e+02 -5.575000000000000000e+01 4.775000000000000000e+01
1.700000000000000000e+01 1.445769230769230944e+03 5.596926879882812500e+02 4.455688476562500000e+00 0.000000000000000000e+00 0.000000000000000000e+00 2.298582519531250000e+03 1.866452932357788086e+00 1.000000000000000000e+00 2.057682342529296875e+02 -5.475000000000000000e+01 4.775000000000000000e+01
5.400000000000000000e+01 6.941769230769228898e+02 2.720036010742187500e+02 1.243804931640625000e+00 0.000000000000000000e+00 0.000000000000000000e+00 2.816271240234375000e+03 9.346514344215393066e-01 4.000000000000000000e+00 3.700046997070312500e+02 -9.425000000000000000e+01 4.825000000000000000e+01
5.800000000000000000e+01 7.060230769230767010e+02 2.905076904296875000e+02 1.075653076171875000e+00 0.000000000000000000e+00 0.000000000000000000e+00 2.778489501953125000e+03 9.319379925727844238e-01 4.000000000000000000e+00 3.648097534179687500e+02 -9.375000000000000000e+01 4.825000000000000000e+01
5.100000000000000000e+01 7.061538461538465299e+02 2.849422912597656250e+02 1.072784423828125000e+00 0.000000000000000000e+00 0.000000000000000000e+00 2.757471435546875000e+03 9.185824990272521973e-01 4.000000000000000000e+00 3.896738891601562500e+02 -9.325000000000000000e+01 4.825000000000000000e+01
5.000000000000000000e+01 7.445769230769235492e+02 2.575751037597656250e+02 1.069915771484375000e+00 0.000000000000000000e+00 0.000000000000000000e+00 2.736453613281250000e+03 9.597800374031066895e-01 4.000000000000000000e+00 4.124656372070312500e+02 -9.275000000000000000e+01 4.825000000000000000e+01
5.700000000000000000e+01 7.898538461538463480e+02 2.839342956542968750e+02 1.067016601562500000e+00 0.000000000000000000e+00 0.000000000000000000e+00 2.715435546875000000e+03 8.828623294830322266e-01 4.000000000000000000e+00 3.771672363281250000e+02 -9.225000000000000000e+01 4.825000000000000000e+01
5.700000000000000000e+01 8.338692307692310806e+02 2.978247070312500000e+02 1.116790771484375000e+00 0.000000000000000000e+00 0.000000000000000000e+00 2.701898193359375000e+03 2.095458269119262695e+00 4.000000000000000000e+00 4.152086486816406250e+02 -9.175000000000000000e+01 4.825000000000000000e+01
5.900000000000000000e+01 8.178076923076924913e+02 2.961388244628906250e+02 1.532318115234375000e+00 0.000000000000000000e+00 2.941176593303680420e-01 2.719706054687500000e+03 1.940888404846191406e+00 4.000000000000000000e+00 4.447554626464843750e+02 -9.075000000000000000e+01 4.825000000000000000e+01
5.400000000000000000e+01 7.930461538461532882e+02 2.955744628906250000e+02 1.740051269531250000e+00 0.000000000000000000e+00 0.000000000000000000e+00 2.728610107421875000e+03 8.448252677917480469e-01 4.000000000000000000e+00 4.892805480957031250e+02 -9.025000000000000000e+01 4.825000000000000000e+01
5.100000000000000000e+01 7.698923076923075541e+02 3.203832092285156250e+02 1.875549316406250000e+00 0.000000000000000000e+00 0.000000000000000000e+00 2.649788085937500000e+03 8.561805486679077148e-01 4.000000000000000000e+00 3.906882019042968750e+02 -8.975000000000000000e+01 4.825000000000000000e+01
6.200000000000000000e+01 9.352923076923078725e+02 3.838340454101562500e+02 1.892578125000000000e+00 0.000000000000000000e+00 0.000000000000000000e+00 2.512354980468750000e+03 1.003752946853637695e+00 4.000000000000000000e+00 4.753412780761718750e+02 -8.575000000000000000e+01 4.825000000000000000e+01
5.400000000000000000e+01 9.354923076923076906e+02 3.595880126953125000e+02 1.613586425781250000e+00 0.000000000000000000e+00 0.000000000000000000e+00 2.511989501953125000e+03 1.389614820480346680e+00 4.000000000000000000e+00 4.522672424316406250e+02 -8.525000000000000000e+01 4.825000000000000000e+01
4.400000000000000000e+01 9.733461538461538112e+02 3.371981506347656250e+02 1.334625244140625000e+00 0.000000000000000000e+00 0.000000000000000000e+00 2.511623779296875000e+03 1.131552338600158691e+00 3.000000000000000000e+00 3.897495117187500000e+02 -8.475000000000000000e+01 4.825000000000000000e+01
6.200000000000000000e+01 9.742230769230767464e+02 3.495855102539062500e+02 1.052490234375000000e+00 0.000000000000000000e+00 0.000000000000000000e+00 2.505650878906250000e+03 8.203519582748413086e-01 4.000000000000000000e+00 3.649282836914062500e+02 -8.425000000000000000e+01 4.825000000000000000e+01
5.800000000000000000e+01 8.992923076923071903e+02 3.817747192382812500e+02 7.609558105468750000e-01 0.000000000000000000e+00 0.000000000000000000e+00 2.482855224609375000e+03 8.217586874961853027e-01 4.000000000000000000e+00 3.962853088378906250e+02 -8.375000000000000000e+01 4.825000000000000000e+01
6.100000000000000000e+01 8.854076923076926278e+02 4.042376708984375000e+02 4.693908691406250000e-01 0.000000000000000000e+00 0.000000000000000000e+00 2.460059814453125000e+03 8.298470377922058105e-01 4.000000000000000000e+00 3.883303222656250000e+02 -8.325000000000000000e+01 4.825000000000000000e+01
4.400000000000000000e+01 8.591461538461534246e+02 4.178525390625000000e+02 1.778564453125000000e-01 0.000000000000000000e+00 0.000000000000000000e+00 2.437264404296875000e+03 8.414035439491271973e-01 3.000000000000000000e+00 3.520365600585937500e+02 -8.275000000000000000e+01 4.825000000000000000e+01
6.600000000000000000e+01 8.305923076923077133e+02 4.373612060546875000e+02 -1.671752929687500000e-01 0.000000000000000000e+00 0.000000000000000000e+00 2.412885253906250000e+03 8.582506179809570312e-01 4.000000000000000000e+00 3.541984252929687500e+02 -8.175000000000000000e+01 4.825000000000000000e+01
2.900000000000000000e+01 8.422538461538453021e+02 4.274512634277343750e+02 -2.999877929687500000e-01 0.000000000000000000e+00 0.000000000000000000e+00 2.404230957031250000e+03 8.676744103431701660e-01 3.000000000000000000e+00 3.217448730468750000e+02 -8.125000000000000000e+01 4.825000000000000000e+01
1.700000000000000000e+01 8.240307692307693515e+02 3.894057312011718750e+02 -4.328308105468750000e-01 0.000000000000000000e+00 3.529411852359771729e-01 2.395576904296875000e+03 8.654832839965820312e-01 1.000000000000000000e+00 3.505063781738281250e+02 -8.075000000000000000e+01 4.825000000000000000e+01
6.000000000000000000e+01 8.372769230769237083e+02 3.411484985351562500e+02 -4.655151367187500000e-01 0.000000000000000000e+00 0.000000000000000000e+00 2.386410644531250000e+03 8.580923676490783691e-01 4.000000000000000000e+00 3.293250427246093750e+02 -8.025000000000000000e+01 4.825000000000000000e+01
4.900000000000000000e+01 8.638230769230766555e+02 3.447168884277343750e+02 -4.648132324218750000e-01 0.000000000000000000e+00 0.000000000000000000e+00 2.377073730468750000e+03 8.535896539688110352e-01 4.000000000000000000e+00 3.167617797851562500e+02 -7.975000000000000000e+01 4.825000000000000000e+01
5.100000000000000000e+01 8.773307692307697607e+02 4.177413635253906250e+02 -4.641113281250000000e-01 0.000000000000000000e+00 0.000000000000000000e+00 2.367736816406250000e+03 8.501995205879211426e-01 4.000000000000000000e+00 3.283214111328125000e+02 -7.925000000000000000e+01 4.825000000000000000e+01
6.200000000000000000e+01 8.655538461538463935e+02 4.594786987304687500e+02 -4.634094238281250000e-01 0.000000000000000000e+00 0.000000000000000000e+00 2.358399902343750000e+03 8.474438786506652832e-01 4.000000000000000000e+00 3.142016601562500000e+02 -7.875000000000000000e+01 4.825000000000000000e+01
6.000000000000000000e+01 9.315461538461543114e+02 4.701307067871093750e+02 -2.925415039062500000e-01 0.000000000000000000e+00 0.000000000000000000e+00 2.313774902343750000e+03 8.354665637016296387e-01 4.000000000000000000e+00 3.386366271972656250e+02 -7.725000000000000000e+01 4.825000000000000000e+01
6.200000000000000000e+01 9.294307692307694424e+02 4.728047790527343750e+02 -2.499084472656250000e-01 0.000000000000000000e+00 0.000000000000000000e+00 2.297050537109375000e+03 8.162196874618530273e-01 4.000000000000000000e+00 3.585451965332031250e+02 -7.675000000000000000e+01 4.825000000000000000e+01
4.800000000000000000e+01 9.510384615384616609e+02 4.826366271972656250e+02 -2.502136230468750000e-01 0.000000000000000000e+00 5.882353186607360840e-01 2.274777832031250000e+03 1.982495665550231934e+00 4.000000000000000000e+00 4.197441711425781250e+02 -7.625000000000000000e+01 4.825000000000000000e+01
5.400000000000000000e+01 9.560307692307694651e+02 4.884004211425781250e+02 -2.505493164062500000e-01 0.000000000000000000e+00 1.176470592617988586e-01 2.252505371093750000e+03 1.596284031867980957e+00 4.000000000000000000e+00 4.361952209472656250e+02 -7.575000000000000000e+01 4.825000000000000000e+01
6.900000000000000000e+01 9.542923076923078725e+02 4.874270935058593750e+02 -2.508544921875000000e-01 0.000000000000000000e+00 0.000000000000000000e+00 2.230232666015625000e+03 1.673174500465393066e+00 4.000000000000000000e+00 4.253572082519531250e+02 -7.525000000000000000e+01 4.825000000000000000e+01
4.400000000000000000e+01 9.550538461538461661e+02 4.788467102050781250e+02 -2.819519042968750000e-01 0.000000000000000000e+00 0.000000000000000000e+00 2.209760742187500000e+03 1.089130163192749023e+00 3.000000000000000000e+00 4.330767822265625000e+02 -7.475000000000000000e+01 4.825000000000000000e+01
5.600000000000000000e+01 9.458384615384613880e+02 4.728385620117187500e+02 -3.437805175781250000e-01 0.000000000000000000e+00 0.000000000000000000e+00 2.191089599609375000e+03 1.314926862716674805e+00 4.000000000000000000e+00 4.692007446289062500e+02 -7.425000000000000000e+01 4.825000000000000000e+01
6.500000000000000000e+01 9.724230769230766782e+02 4.639788208007812500e+02 -4.056396484375000000e-01 9.999999776482582092e-03 0.000000000000000000e+00 2.172418212890625000e+03 1.924251198768615723e+00 4.000000000000000000e+00 5.469418945312500000e+02 -7.375000000000000000e+01 4.825000000000000000e+01
3.200000000000000000e+01 9.450307692307693515e+02 4.519853820800781250e+02 -4.674682617187500000e-01 0.000000000000000000e+00 5.882353186607360840e-01 2.153747070312500000e+03 1.338605046272277832e+00 3.000000000000000000e+00 5.366400756835937500e+02 -7.325000000000000000e+01 4.825000000000000000e+01
6.200000000000000000e+01 9.622692307692306031e+02 4.505471191406250000e+02 -5.243530273437500000e-01 0.000000000000000000e+00 5.294117927551269531e-01 2.142044921875000000e+03 8.277909755706787109e-01 4.000000000000000000e+00 4.724485168457031250e+02 -7.275000000000000000e+01 4.825000000000000000e+01
6.500000000000000000e+01 9.806538461538459615e+02 4.632419128417968750e+02 -5.795898437500000000e-01 0.000000000000000000e+00 0.000000000000000000e+00 2.132665771484375000e+03 8.329255580902099609e-01 4.000000000000000000e+00 3.408696289062500000e+02 -7.225000000000000000e+01 4.825000000000000000e+01
6.800000000000000000e+01 1.089738461538461479e+03 4.775076904296875000e+02 -6.348266601562500000e-01 0.000000000000000000e+00 0.000000000000000000e+00 2.123286621093750000e+03 8.173902630805969238e-01 4.000000000000000000e+00 3.695540771484375000e+02 -7.175000000000000000e+01 4.825000000000000000e+01
6.100000000000000000e+01 1.085699999999999818e+03 4.898060607910156250e+02 -6.900634765625000000e-01 0.000000000000000000e+00 0.000000000000000000e+00 2.113907470703125000e+03 8.191225528717041016e-01 4.000000000000000000e+00 3.328840026855468750e+02 -7.125000000000000000e+01 4.825000000000000000e+01
6.300000000000000000e+01 1.074238461538462161e+03 4.881461791992187500e+02 -6.621398925781250000e-01 0.000000000000000000e+00 0.000000000000000000e+00 2.123284667968750000e+03 8.120300173759460449e-01 4.000000000000000000e+00 2.559029388427734375e+02 -7.075000000000000000e+01 4.825000000000000000e+01
6.100000000000000000e+01 1.163861538461538430e+03 4.790257568359375000e+02 -6.342468261718750000e-01 0.000000000000000000e+00 0.000000000000000000e+00 2.132661621093750000e+03 7.995492219924926758e-01 4.000000000000000000e+00 2.790186157226562500e+02 -7.025000000000000000e+01 4.825000000000000000e+01
4.900000000000000000e+01 1.088330769230769420e+03 4.734266967773437500e+02 -6.063232421875000000e-01 0.000000000000000000e+00 0.000000000000000000e+00 2.142038818359375000e+03 8.283311128616333008e-01 4.000000000000000000e+00 1.893049163818359375e+02 -6.975000000000000000e+01 4.825000000000000000e+01
5.300000000000000000e+01 1.202023076923076587e+03 4.707916564941406250e+02 -1.514892578125000000e-01 0.000000000000000000e+00 0.000000000000000000e+00 2.218148193359375000e+03 8.262496590614318848e-01 4.000000000000000000e+00 3.307704772949218750e+02 -6.825000000000000000e+01 4.825000000000000000e+01
6.600000000000000000e+01 1.223353846153846689e+03 4.924128723144531250e+02 4.138183593750000000e-02 0.000000000000000000e+00 0.000000000000000000e+00 2.248849121093750000e+03 8.194483518600463867e-01 4.000000000000000000e+00 3.514015808105468750e+02 -6.775000000000000000e+01 4.825000000000000000e+01
7.100000000000000000e+01 1.122346153846153584e+03 5.027355346679687500e+02 3.411254882812500000e-01 0.000000000000000000e+00 0.000000000000000000e+00 2.284138916015625000e+03 8.187907338142395020e-01 4.000000000000000000e+00 2.681500244140625000e+02 -6.725000000000000000e+01 4.825000000000000000e+01
7.000000000000000000e+01 1.149999999999999773e+03 5.037157897949218750e+02 7.478332519531250000e-01 0.000000000000000000e+00 0.000000000000000000e+00 2.324017822265625000e+03 8.149830102920532227e-01 4.000000000000000000e+00 4.225621337890625000e+02 -6.675000000000000000e+01 4.825000000000000000e+01
6.900000000000000000e+01 1.145176923076923686e+03 5.139420166015625000e+02 1.154510498046875000e+00 0.000000000000000000e+00 0.000000000000000000e+00 2.363896728515625000e+03 8.372372388839721680e-01 4.000000000000000000e+00 4.232078552246093750e+02 -6.625000000000000000e+01 4.825000000000000000e+01
5.000000000000000000e+01 1.232976923076922731e+03 5.517775878906250000e+02 2.031585693359375000e+00 0.000000000000000000e+00 0.000000000000000000e+00 2.388236572265625000e+03 8.345665335655212402e-01 4.000000000000000000e+00 4.195555114746093750e+02 -6.525000000000000000e+01 4.825000000000000000e+01
1.100000000000000000e+01 1.255276923076924049e+03 5.910411987304687500e+02 3.839111328125000000e+00 0.000000000000000000e+00 0.000000000000000000e+00 2.215623046875000000e+03 1.812077283859252930e+00 1.000000000000000000e+00 4.696336364746093750e+02 -5.825000000000000000e+01 4.825000000000000000e+01
4.700000000000000000e+01 1.315015384615384619e+03 5.789090576171875000e+02 3.777160644531250000e+00 0.000000000000000000e+00 0.000000000000000000e+00 2.220153808593750000e+03 1.814526915550231934e+00 4.000000000000000000e+00 3.627439270019531250e+02 -5.775000000000000000e+01 4.825000000000000000e+01
2.200000000000000000e+01 1.278523076923077497e+03 5.729507446289062500e+02 3.764129638671875000e+00 0.000000000000000000e+00 0.000000000000000000e+00 2.227177001953125000e+03 1.887472867965698242e+00 3.000000000000000000e+00 3.640198669433593750e+02 -5.725000000000000000e+01 4.825000000000000000e+01
3.500000000000000000e+01 1.358600000000000136e+03 5.763348388671875000e+02 3.738067626953125000e+00 0.000000000000000000e+00 0.000000000000000000e+00 2.241223388671875000e+03 1.939140796661376953e+00 3.000000000000000000e+00 2.714124145507812500e+02 -5.625000000000000000e+01 4.825000000000000000e+01
3.600000000000000000e+01 1.401799999999999727e+03 5.735719604492187500e+02 3.803314208984375000e+00 0.000000000000000000e+00 0.000000000000000000e+00 2.246427490234375000e+03 1.993491291999816895e+00 3.000000000000000000e+00 2.343341522216796875e+02 -5.575000000000000000e+01 4.825000000000000000e+01
2.000000000000000000e+01 1.396123076923076496e+03 5.737103881835937500e+02 3.868560791015625000e+00 0.000000000000000000e+00 0.000000000000000000e+00 2.251631591796875000e+03 1.712655782699584961e+00 3.000000000000000000e+00 2.352932434082031250e+02 -5.525000000000000000e+01 4.825000000000000000e+01
4.000000000000000000e+01 1.276923076923076451e+03 5.816057739257812500e+02 4.005767822265625000e+00 0.000000000000000000e+00 0.000000000000000000e+00 2.242748779296875000e+03 8.136433362960815430e-01 3.000000000000000000e+00 1.302368621826171875e+02 -5.425000000000000000e+01 4.825000000000000000e+01
3.000000000000000000e+00 5.647692307692306031e+02 2.403510284423828125e+02 2.086334228515625000e+00 0.000000000000000000e+00 5.882353186607360840e-01 2.979109863281250000e+03 3.654108524322509766e+00 1.000000000000000000e+00 3.018871459960937500e+02 -9.775000000000000000e+01 4.875000000000000000e+01
3.000000000000000000e+00 6.086615384615383846e+02 2.816318054199218750e+02 1.529266357421875000e+00 0.000000000000000000e+00 1.117647051811218262e+00 2.877527099609375000e+03 3.549945592880249023e+00 1.000000000000000000e+00 3.100026855468750000e+02 -9.625000000000000000e+01 4.875000000000000000e+01
7.000000000000000000e+00 6.541692307692308077e+02 2.870187683105468750e+02 1.123352050781250000e+00 0.000000000000000000e+00 5.294117927551269531e-01 2.798823242187500000e+03 2.977973222732543945e+00 1.000000000000000000e+00 3.607959289550781250e+02 -9.525000000000000000e+01 4.875000000000000000e+01
1.900000000000000000e+01 6.779692307692307622e+02 2.798859252929687500e+02 9.490051269531250000e-01 0.000000000000000000e+00 5.882353186607360840e-01 2.760330078125000000e+03 2.299339532852172852e+00 1.000000000000000000e+00 3.304945068359375000e+02 -9.475000000000000000e+01 4.875000000000000000e+01
4.200000000000000000e+01 7.656846153846153129e+02 2.934852600097656250e+02 5.769348144531250000e-01 0.000000000000000000e+00 0.000000000000000000e+00 2.636902587890625000e+03 1.743902564048767090e+00 3.000000000000000000e+00 3.807443542480468750e+02 -9.275000000000000000e+01 4.875000000000000000e+01
5.400000000000000000e+01 7.967615384615388621e+02 2.932876281738281250e+02 5.652770996093750000e-01 0.000000000000000000e+00 0.000000000000000000e+00 2.613681640625000000e+03 9.819247722625732422e-01 4.000000000000000000e+00 3.776227111816406250e+02 -9.225000000000000000e+01 4.875000000000000000e+01
5.200000000000000000e+01 8.401769230769234582e+02 3.007324523925781250e+02 6.009521484375000000e-01 0.000000000000000000e+00 0.000000000000000000e+00 2.596717285156250000e+03 1.528464317321777344e+00 4.000000000000000000e+00 4.070294494628906250e+02 -9.175000000000000000e+01 4.875000000000000000e+01
6.300000000000000000e+01 8.381076923076921048e+02 3.073057556152343750e+02 7.786865234375000000e-01 0.000000000000000000e+00 0.000000000000000000e+00 2.598522216796875000e+03 2.093606233596801758e+00 4.000000000000000000e+00 4.481235351562500000e+02 -9.125000000000000000e+01 4.875000000000000000e+01
6.500000000000000000e+01 8.178923076923078952e+02 3.294457397460937500e+02 1.134155273437500000e+00 0.000000000000000000e+00 0.000000000000000000e+00 2.602131835937500000e+03 1.781433701515197754e+00 4.000000000000000000e+00 4.933945312500000000e+02 -9.025000000000000000e+01 4.875000000000000000e+01
5.400000000000000000e+01 8.235384615384620020e+02 3.220508728027343750e+02 1.237609863281250000e+00 0.000000000000000000e+00 0.000000000000000000e+00 2.512681884765625000e+03 1.718945026397705078e+00 4.000000000000000000e+00 4.865958251953125000e+02 -8.975000000000000000e+01 4.875000000000000000e+01
6.300000000000000000e+01 7.872923076923077588e+02 3.207713317871093750e+02 1.266784667968750000e+00 0.000000000000000000e+00 0.000000000000000000e+00 2.331977294921875000e+03 1.582028031349182129e+00 4.000000000000000000e+00 4.775141601562500000e+02 -8.925000000000000000e+01 4.875000000000000000e+01
5.200000000000000000e+01 8.356230769230764963e+02 3.906992797851562500e+02 8.926391601562500000e-01 0.000000000000000000e+00 5.882352963089942932e-02 2.448678955078125000e+03 1.989857554435729980e+00 4.000000000000000000e+00 3.973202819824218750e+02 -8.525000000000000000e+01 4.875000000000000000e+01
6.600000000000000000e+01 8.476846153846157677e+02 3.748545532226562500e+02 6.188354492187500000e-01 0.000000000000000000e+00 0.000000000000000000e+00 2.424813232421875000e+03 1.988097429275512695e+00 4.000000000000000000e+00 3.724656066894531250e+02 -8.475000000000000000e+01 4.875000000000000000e+01
6.300000000000000000e+01 8.826076923076925596e+02 3.755951843261718750e+02 3.489074707031250000e-01 0.000000000000000000e+00 5.882353186607360840e-01 2.402072021484375000e+03 2.003885746002197266e+00 4.000000000000000000e+00 3.590238647460937500e+02 -8.425000000000000000e+01 4.875000000000000000e+01
5.000000000000000000e+01 8.909461538461539476e+02 3.915906677246093750e+02 9.069824218750000000e-02 0.000000000000000000e+00 0.000000000000000000e+00 2.382704833984375000e+03 8.322681188583374023e-01 4.000000000000000000e+00 3.251567687988281250e+02 -8.375000000000000000e+01 4.875000000000000000e+01
5.200000000000000000e+01 8.390692307692303302e+02 4.121239318847656250e+02 -1.675415039062500000e-01 0.000000000000000000e+00 0.000000000000000000e+00 2.363337646484375000e+03 8.314341306686401367e-01 4.000000000000000000e+00 3.232625122070312500e+02 -8.325000000000000000e+01 4.875000000000000000e+01
6.900000000000000000e+01 8.361846153846149718e+02 4.251931457519531250e+02 -4.257812500000000000e-01 0.000000000000000000e+00 0.000000000000000000e+00 2.343970214843750000e+03 8.378474712371826172e-01 4.000000000000000000e+00 3.069476318359375000e+02 -8.275000000000000000e+01 4.875000000000000000e+01
2.600000000000000000e+01 8.193230769230771102e+02 4.381427917480468750e+02 -6.081237792968750000e-01 0.000000000000000000e+00 0.000000000000000000e+00 2.330743896484375000e+03 8.431279063224792480e-01 3.000000000000000000e+00 2.806641235351562500e+02 -8.225000000000000000e+01 4.875000000000000000e+01
5.000000000000000000e+01 8.190076923076923094e+02 4.495148315429687500e+02 -7.145996093750000000e-01 0.000000000000000000e+00 0.000000000000000000e+00 2.323658447265625000e+03 8.466758728027343750e-01 4.000000000000000000e+00 3.063881835937500000e+02 -8.175000000000000000e+01 4.875000000000000000e+01
6.800000000000000000e+01 8.327230769230773149e+02 4.522370300292968750e+02 -8.210754394531250000e-01 0.000000000000000000e+00 0.000000000000000000e+00 2.316572998046875000e+03 8.496609926223754883e-01 4.000000000000000000e+00 2.842149353027343750e+02 -8.125000000000000000e+01 4.875000000000000000e+01
5.300000000000000000e+01 7.844769230769231854e+02 4.393803405761718750e+02 -9.275817871093750000e-01 0.000000000000000000e+00 0.000000000000000000e+00 2.309487548828125000e+03 2.208610057830810547e+00 4.000000000000000000e+00 2.851445007324218750e+02 -8.075000000000000000e+01 4.875000000000000000e+01
3.500000000000000000e+01 8.692692307692309441e+02 4.544194946289062500e+02 -9.445800781250000000e-01 0.000000000000000000e+00 0.000000000000000000e+00 2.282124023437500000e+03 2.954519748687744141e+00 3.000000000000000000e+00 2.771963806152343750e+02 -7.925000000000000000e+01 4.875000000000000000e+01
3.900000000000000000e+01 8.796692307692305803e+02 4.685261535644531250e+02 -9.410705566406250000e-01 0.000000000000000000e+00 0.000000000000000000e+00 2.272817871093750000e+03 9.172104597091674805e-01 3.000000000000000000e+00 3.135198669433593750e+02 -7.875000000000000000e+01 4.875000000000000000e+01
6.400000000000000000e+01 8.800307692307688967e+02 4.663063659667968750e+02 -8.997192382812500000e-01 0.000000000000000000e+00 0.000000000000000000e+00 2.256313964843750000e+03 1.140908479690551758e+00 4.000000000000000000e+00 3.085361022949218750e+02 -7.825000000000000000e+01 4.875000000000000000e+01
6.800000000000000000e+01 8.956076923076919911e+02 4.659923400878906250e+02 -8.170166015625000000e-01 0.000000000000000000e+00 0.000000000000000000e+00 2.223306396484375000e+03 8.166640400886535645e-01 4.000000000000000000e+00 3.030991821289062500e+02 -7.725000000000000000e+01 4.875000000000000000e+01
3.600000000000000000e+01 9.059923076923080316e+02 4.660487060546875000e+02 -7.882080078125000000e-01 0.000000000000000000e+00 2.941176593303680420e-01 2.205148437500000000e+03 1.996564507484436035e+00 3.000000000000000000e+00 4.052286682128906250e+02 -7.675000000000000000e+01 4.875000000000000000e+01
7.000000000000000000e+01 9.243076923076921503e+02 4.743436889648437500e+02 -9.009704589843750000e-01 9.999999776482582092e-03 5.882353186607360840e-01 2.096708740234375000e+03 1.556341886520385742e+00 4.000000000000000000e+00 5.547574462890625000e+02 -7.425000000000000000e+01 4.875000000000000000e+01
2.400000000000000000e+01 9.550230769230765873e+02 4.397765808105468750e+02 -1.010253906250000000e+00 9.999999776482582092e-03 0.000000000000000000e+00 2.060018798828125000e+03 1.325016379356384277e+00 3.000000000000000000e+00 5.566351318359375000e+02 -7.325000000000000000e+01 4.875000000000000000e+01
5.700000000000000000e+01 8.947923076923075314e+02 4.403489379882812500e+02 -1.052398681640625000e+00 0.000000000000000000e+00 0.000000000000000000e+00 2.048578613281250000e+03 1.049268126487731934e+00 4.000000000000000000e+00 2.467613983154296875e+02 -7.275000000000000000e+01 4.875000000000000000e+01
6.600000000000000000e+01 1.094961538461538112e+03 4.347026367187500000e+02 -1.166442871093750000e+00 0.000000000000000000e+00 0.000000000000000000e+00 2.021163452148437500e+03 1.112321734428405762e+00 4.000000000000000000e+00 3.124559936523437500e+02 -7.125000000000000000e+01 4.875000000000000000e+01
6.300000000000000000e+01 1.086076923076922867e+03 4.523085021972656250e+02 -1.130493164062500000e+00 9.999999776482582092e-03 0.000000000000000000e+00 2.029170410156250000e+03 1.936403274536132812e+00 4.000000000000000000e+00 6.773883056640625000e+02 -7.075000000000000000e+01 4.875000000000000000e+01
5.800000000000000000e+01 1.174315384615385028e+03 4.608168640136718750e+02 -1.094543457031250000e+00 9.999999776482582092e-03 0.000000000000000000e+00 2.037177490234375000e+03 1.361374258995056152e+00 4.000000000000000000e+00 6.630941162109375000e+02 -7.025000000000000000e+01 4.875000000000000000e+01
5.600000000000000000e+01 1.137061538461538930e+03 4.731344604492187500e+02 -1.058593750000000000e+00 0.000000000000000000e+00 0.000000000000000000e+00 2.045184570312500000e+03 7.994110584259033203e-01 4.000000000000000000e+00 3.482135009765625000e+02 -6.975000000000000000e+01 4.875000000000000000e+01
6.300000000000000000e+01 1.145838461538461843e+03 5.022133178710937500e+02 -1.372985839843750000e-01 0.000000000000000000e+00 0.000000000000000000e+00 2.175510009765625000e+03 1.038995623588562012e+00 4.000000000000000000e+00 3.110983276367187500e+02 -6.725000000000000000e+01 4.875000000000000000e+01
2.600000000000000000e+01 1.208000000000000227e+03 4.871895751953125000e+02 2.570800781250000000e-01 0.000000000000000000e+00 0.000000000000000000e+00 2.213376708984375000e+03 1.195668578147888184e+00 3.000000000000000000e+00 5.611240844726562500e+02 -6.675000000000000000e+01 4.875000000000000000e+01
6.300000000000000000e+01 1.253076923076922867e+03 4.971596679687500000e+02 6.514587402343750000e-01 0.000000000000000000e+00 0.000000000000000000e+00 2.251243408203125000e+03 8.938788771629333496e-01 4.000000000000000000e+00 3.931585388183593750e+02 -6.625000000000000000e+01 4.875000000000000000e+01
3.400000000000000000e+01 1.204330769230769647e+03 5.278962402343750000e+02 1.045867919921875000e+00 0.000000000000000000e+00 0.000000000000000000e+00 2.289110107421875000e+03 7.921564579010009766e-01 3.000000000000000000e+00 5.199870605468750000e+02 -6.575000000000000000e+01 4.875000000000000000e+01
5.000000000000000000e+01 1.180930769230769556e+03 5.565148315429687500e+02 1.506378173828125000e+00 0.000000000000000000e+00 0.000000000000000000e+00 2.279867431640625000e+03 7.957042455673217773e-01 4.000000000000000000e+00 4.247658996582031250e+02 -6.525000000000000000e+01 4.875000000000000000e+01
6.600000000000000000e+01 1.187815384615384573e+03 5.754304199218750000e+02 1.988922119140625000e+00 0.000000000000000000e+00 0.000000000000000000e+00 2.254921875000000000e+03 8.036502003669738770e-01 4.000000000000000000e+00 2.171273345947265625e+02 -6.475000000000000000e+01 4.875000000000000000e+01
5.000000000000000000e+01 1.160838461538461161e+03 5.859000244140625000e+02 3.309448242187500000e+00 0.000000000000000000e+00 0.000000000000000000e+00 2.132410156250000000e+03 1.969517230987548828e+00 4.000000000000000000e+00 2.921867370605468750e+02 -5.825000000000000000e+01 4.875000000000000000e+01
7.000000000000000000e+00 1.121976923076923413e+03 5.909415283203125000e+02 3.223968505859375000e+00 0.000000000000000000e+00 0.000000000000000000e+00 2.139426757812500000e+03 1.519392251968383789e+00 1.000000000000000000e+00 4.890669860839843750e+02 -5.725000000000000000e+01 4.875000000000000000e+01
6.600000000000000000e+01 1.134676923076923231e+03 5.812207031250000000e+02 3.191894531250000000e+00 0.000000000000000000e+00 0.000000000000000000e+00 2.147907958984375000e+03 1.948730230331420898e+00 4.000000000000000000e+00 2.246129150390625000e+02 -5.625000000000000000e+01 4.875000000000000000e+01
5.800000000000000000e+01 1.136076923076922640e+03 5.720255737304687500e+02 3.273681640625000000e+00 0.000000000000000000e+00 0.000000000000000000e+00 2.153154052734375000e+03 2.008877277374267578e+00 4.000000000000000000e+00 2.072796783447265625e+02 -5.575000000000000000e+01 4.875000000000000000e+01
3.800000000000000000e+01 1.188407692307692741e+03 5.780091552734375000e+02 3.355468750000000000e+00 0.000000000000000000e+00 0.000000000000000000e+00 2.158400146484375000e+03 2.023649454116821289e+00 3.000000000000000000e+00 2.823653869628906250e+02 -5.525000000000000000e+01 4.875000000000000000e+01
2.100000000000000000e+01 1.207984615384615608e+03 5.965772094726562500e+02 3.437255859375000000e+00 0.000000000000000000e+00 0.000000000000000000e+00 2.163645996093750000e+03 2.008907079696655273e+00 3.000000000000000000e+00 2.294651031494140625e+02 -5.475000000000000000e+01 4.875000000000000000e+01
9.000000000000000000e+00 6.082769230769233673e+02 2.405893096923828125e+02 1.621002197265625000e+00 0.000000000000000000e+00 1.176470637321472168e+00 2.889971923828125000e+03 3.567128181457519531e+00 1.000000000000000000e+00 3.852011108398437500e+02 -9.825000000000000000e+01 4.925000000000000000e+01
6.700000000000000000e+01 6.045384615384616609e+02 2.650178222656250000e+02 1.083984375000000000e+00 0.000000000000000000e+00 2.352941185235977173e-01 2.789942626953125000e+03 1.604526042938232422e+00 4.000000000000000000e+00 3.350627746582031250e+02 -9.625000000000000000e+01 4.925000000000000000e+01
6.400000000000000000e+01 7.391923076923077360e+02 3.228109436035156250e+02 1.657714843750000000e-01 0.000000000000000000e+00 0.000000000000000000e+00 2.599057617187500000e+03 2.229964971542358398e+00 4.000000000000000000e+00 3.797130432128906250e+02 -9.375000000000000000e+01 4.925000000000000000e+01
5.100000000000000000e+01 7.536615384615387256e+02 3.281007080078125000e+02 1.382446289062500000e-01 0.000000000000000000e+00 0.000000000000000000e+00 2.575084960937500000e+03 2.220333099365234375e+00 4.000000000000000000e+00 3.912229614257812500e+02 -9.325000000000000000e+01 4.925000000000000000e+01
4.800000000000000000e+01 7.627153846153848917e+02 3.214253845214843750e+02 1.107482910156250000e-01 0.000000000000000000e+00 0.000000000000000000e+00 2.551112060546875000e+03 2.191840171813964844e+00 4.000000000000000000e+00 4.321422729492187500e+02 -9.275000000000000000e+01 4.925000000000000000e+01
5.800000000000000000e+01 8.013999999999997499e+02 3.291920776367187500e+02 9.545898437500000000e-02 0.000000000000000000e+00 0.000000000000000000e+00 2.508476806640625000e+03 2.142397880554199219e+00 4.000000000000000000e+00 4.599570617675781250e+02 -9.175000000000000000e+01 4.925000000000000000e+01
5.000000000000000000e+01 8.144461538461540613e+02 3.338511352539062500e+02 2.267761230468750000e-01 0.000000000000000000e+00 0.000000000000000000e+00 2.505746582031250000e+03 2.106612205505371094e+00 4.000000000000000000e+00 4.646437377929687500e+02 -9.125000000000000000e+01 4.925000000000000000e+01
5.500000000000000000e+01 8.320461538461541977e+02 3.470938720703125000e+02 3.580932617187500000e-01 0.000000000000000000e+00 5.882352963089942932e-02 2.503016113281250000e+03 2.058901309967041016e+00 4.000000000000000000e+00 5.062287292480468750e+02 -9.075000000000000000e+01 4.925000000000000000e+01
6.000000000000000000e+01 8.155384615384620020e+02 3.460782470703125000e+02 5.634460449218750000e-01 0.000000000000000000e+00 2.941176593303680420e-01 2.433010253906250000e+03 1.985941886901855469e+00 4.000000000000000000e+00 4.912802124023437500e+02 -8.975000000000000000e+01 4.925000000000000000e+01
4.500000000000000000e+01 8.097307692307693969e+02 3.297027282714843750e+02 5.801391601562500000e-01 0.000000000000000000e+00 0.000000000000000000e+00 2.301189941406250000e+03 1.636946797370910645e+00 4.000000000000000000e+00 4.277769470214843750e+02 -8.925000000000000000e+01 4.925000000000000000e+01
4.700000000000000000e+01 8.204307692307695561e+02 3.566723937988281250e+02 6.115112304687500000e-01 0.000000000000000000e+00 2.352941185235977173e-01 2.083339355468750000e+03 1.979182600975036621e+00 4.000000000000000000e+00 4.700942382812500000e+02 -8.775000000000000000e+01 4.925000000000000000e+01
5.000000000000000000e+01 8.257461538461537884e+02 3.937156066894531250e+02 6.032409667968750000e-01 0.000000000000000000e+00 0.000000000000000000e+00 2.188333251953125000e+03 1.952056288719177246e+00 4.000000000000000000e+00 4.123779296875000000e+02 -8.725000000000000000e+01 4.925000000000000000e+01
2.900000000000000000e+01 8.287538461538463253e+02 4.084529113769531250e+02 5.949707031250000000e-01 0.000000000000000000e+00 2.352941185235977173e-01 2.293327148437500000e+03 1.918120384216308594e+00 3.000000000000000000e+00 3.583916320800781250e+02 -8.675000000000000000e+01 4.925000000000000000e+01
2.200000000000000000e+01 8.390153846153848463e+02 4.113103637695312500e+02 5.867004394531250000e-01 0.000000000000000000e+00 5.882353186607360840e-01 2.398321044921875000e+03 1.283315420150756836e+00 3.000000000000000000e+00 3.113303222656250000e+02 -8.625000000000000000e+01 4.925000000000000000e+01
4.400000000000000000e+01 8.315923076923073722e+02 4.094239501953125000e+02 3.656311035156250000e-01 0.000000000000000000e+00 6.470588445663452148e-01 2.380763183593750000e+03 1.490266084671020508e+00 3.000000000000000000e+00 3.400563964843750000e+02 -8.575000000000000000e+01 4.925000000000000000e+01
6.400000000000000000e+01 7.759923076923075769e+02 4.039267578125000000e+02 1.445617675781250000e-01 0.000000000000000000e+00 0.000000000000000000e+00 2.363205566406250000e+03 1.523413896560668945e+00 4.000000000000000000e+00 3.684986877441406250e+02 -8.525000000000000000e+01 4.925000000000000000e+01
3.400000000000000000e+01 7.335846153846148354e+02 3.970148315429687500e+02 -7.650756835937500000e-02 0.000000000000000000e+00 0.000000000000000000e+00 2.345647705078125000e+03 1.773223876953125000e+00 3.000000000000000000e+00 3.455503234863281250e+02 -8.475000000000000000e+01 4.925000000000000000e+01
4.600000000000000000e+01 7.916615384615387256e+02 3.963053588867187500e+02 -2.861022949218750000e-01 0.000000000000000000e+00 0.000000000000000000e+00 2.329396972656250000e+03 8.957246541976928711e-01 4.000000000000000000e+00 3.059250793457031250e+02 -8.425000000000000000e+01 4.925000000000000000e+01
6.500000000000000000e+01 8.295846153846151765e+02 4.077998962402343750e+02 -4.613037109375000000e-01 0.000000000000000000e+00 0.000000000000000000e+00 2.317066894531250000e+03 1.114793658256530762e+00 4.000000000000000000e+00 2.957686462402343750e+02 -8.375000000000000000e+01 4.925000000000000000e+01
6.700000000000000000e+01 8.500692307692307850e+02 4.221688232421875000e+02 -6.364746093750000000e-01 0.000000000000000000e+00 0.000000000000000000e+00 2.304736816406250000e+03 1.725010275840759277e+00 4.000000000000000000e+00 2.794913024902343750e+02 -8.325000000000000000e+01 4.925000000000000000e+01
4.000000000000000000e+01 8.176307692307689194e+02 4.326007080078125000e+02 -8.116455078125000000e-01 0.000000000000000000e+00 0.000000000000000000e+00 2.292406738281250000e+03 1.356175899505615234e+00 3.000000000000000000e+00 2.633078613281250000e+02 -8.275000000000000000e+01 4.925000000000000000e+01
3.500000000000000000e+01 7.988307692307693060e+02 4.375917663574218750e+02 -9.325256347656250000e-01 0.000000000000000000e+00 0.000000000000000000e+00 2.283651611328125000e+03 1.607346534729003906e+00 3.000000000000000000e+00 2.591428527832031250e+02 -8.225000000000000000e+01 4.925000000000000000e+01
5.400000000000000000e+01 8.028461538461538112e+02 4.423493652343750000e+02 -9.990844726562500000e-01 0.000000000000000000e+00 0.000000000000000000e+00 2.278471679687500000e+03 8.361105322837829590e-01 4.000000000000000000e+00 2.402050018310546875e+02 -8.175000000000000000e+01 4.925000000000000000e+01
5.700000000000000000e+01 8.190846153846159723e+02 4.489575500488281250e+02 -1.065643310546875000e+00 0.000000000000000000e+00 0.000000000000000000e+00 2.273291748046875000e+03 8.428258895874023438e-01 4.000000000000000000e+00 2.434719238281250000e+02 -8.125000000000000000e+01 4.925000000000000000e+01
7.100000000000000000e+01 8.275461538461541977e+02 4.507461242675781250e+02 -1.132202148437500000e+00 0.000000000000000000e+00 0.000000000000000000e+00 2.268111816406250000e+03 9.965552091598510742e-01 4.000000000000000000e+00 2.756149902343750000e+02 -8.075000000000000000e+01 4.925000000000000000e+01
7.100000000000000000e+01 8.260999999999996817e+02 4.515292663574218750e+02 -1.157226562500000000e+00 0.000000000000000000e+00 0.000000000000000000e+00 2.258164062500000000e+03 8.355590105056762695e-01 4.000000000000000000e+00 3.472778320312500000e+02 -8.025000000000000000e+01 4.925000000000000000e+01
4.800000000000000000e+01 8.114230769230767919e+02 4.552044982910156250e+02 -1.168395996093750000e+00 0.000000000000000000e+00 0.000000000000000000e+00 2.246627197265625000e+03 1.819547057151794434e+00 4.000000000000000000e+00 2.970032958984375000e+02 -7.975000000000000000e+01 4.925000000000000000e+01
6.300000000000000000e+01 8.355538461538460524e+02 4.603703613281250000e+02 -1.179565429687500000e+00 0.000000000000000000e+00 0.000000000000000000e+00 2.235090087890625000e+03 9.559422135353088379e-01 4.000000000000000000e+00 3.030541687011718750e+02 -7.925000000000000000e+01 4.925000000000000000e+01
6.100000000000000000e+01 8.520000000000001137e+02 4.633320922851562500e+02 -1.190734863281250000e+00 0.000000000000000000e+00 0.000000000000000000e+00 2.223552978515625000e+03 1.288546085357666016e+00 4.000000000000000000e+00 2.821734924316406250e+02 -7.875000000000000000e+01 4.925000000000000000e+01
4.500000000000000000e+01 8.597615384615388621e+02 4.606148986816406250e+02 -1.203765869140625000e+00 0.000000000000000000e+00 0.000000000000000000e+00 2.201635498046875000e+03 1.605650305747985840e+00 4.000000000000000000e+00 2.887521362304687500e+02 -7.825000000000000000e+01 4.925000000000000000e+01
2.500000000000000000e+01 8.474846153846154948e+02 4.560327148437500000e+02 -1.216796875000000000e+00 0.000000000000000000e+00 0.000000000000000000e+00 2.179717773437500000e+03 8.380243778228759766e-01 3.000000000000000000e+00 3.131561279296875000e+02 -7.775000000000000000e+01 4.925000000000000000e+01
3.700000000000000000e+01 8.482384615384614790e+02 4.500098571777343750e+02 -1.229827880859375000e+00 0.000000000000000000e+00 0.000000000000000000e+00 2.157800048828125000e+03 8.113615512847900391e-01 3.000000000000000000e+00 2.693034057617187500e+02 -7.725000000000000000e+01 4.925000000000000000e+01
6.000000000000000000e+01 8.673615384615386574e+02 4.495261535644531250e+02 -1.252166748046875000e+00 0.000000000000000000e+00 0.000000000000000000e+00 2.134825927734375000e+03 1.473204374313354492e+00 4.000000000000000000e+00 3.101013183593750000e+02 -7.675000000000000000e+01 4.925000000000000000e+01
3.800000000000000000e+01 8.557923076923078725e+02 4.609091796875000000e+02 -1.302398681640625000e+00 0.000000000000000000e+00 2.941176593303680420e-01 2.108683105468750000e+03 1.886710047721862793e+00 3.000000000000000000e+00 3.362405090332031250e+02 -7.625000000000000000e+01 4.925000000000000000e+01
4.900000000000000000e+01 8.670000000000001137e+02 4.849335632324218750e+02 -1.352600097656250000e+00 9.999999776482582092e-03 0.000000000000000000e+00 2.082540283203125000e+03 1.981702566146850586e+00 4.000000000000000000e+00 3.981425476074218750e+02 -7.575000000000000000e+01 4.925000000000000000e+01
4.800000000000000000e+01 8.733076923076921503e+02 4.935500793457031250e+02 -1.402832031250000000e+00 9.999999776482582092e-03 5.882353186607360840e-01 2.056397460937500000e+03 1.970242381095886230e+00 4.000000000000000000e+00 3.909648437500000000e+02 -7.525000000000000000e+01 4.925000000000000000e+01
6.100000000000000000e+01 8.935769230769226397e+02 4.943325500488281250e+02 -1.459381103515625000e+00 9.999999776482582092e-03 2.941176593303680420e-01 2.033066894531250000e+03 1.963293671607971191e+00 4.000000000000000000e+00 4.352072753906250000e+02 -7.475000000000000000e+01 4.925000000000000000e+01
6.300000000000000000e+01 8.419461538461533792e+02 4.467470092773437500e+02 -1.585144042968750000e+00 0.000000000000000000e+00 5.882353186607360840e-01 1.992030639648437500e+03 1.987639188766479492e+00 4.000000000000000000e+00 4.083409423828125000e+02 -7.375000000000000000e+01 4.925000000000000000e+01
6.000000000000000000e+01 8.622153846153846644e+02 4.200051269531250000e+02 -1.648040771484375000e+00 9.999999776482582092e-03 2.941176593303680420e-01 1.971512451171875000e+03 1.976844549179077148e+00 4.000000000000000000e+00 4.407975158691406250e+02 -7.325000000000000000e+01 4.925000000000000000e+01
5.500000000000000000e+01 9.179076923076929688e+02 4.439488220214843750e+02 -1.692108154296875000e+00 0.000000000000000000e+00 2.941176593303680420e-01 1.949466430664062500e+03 8.163918256759643555e-01 4.000000000000000000e+00 2.476797790527343750e+02 -7.225000000000000000e+01 4.925000000000000000e+01
5.400000000000000000e+01 1.030892307692307668e+03 4.438976745605468750e+02 -1.708312988281250000e+00 9.999999776482582092e-03 0.000000000000000000e+00 1.939799926757812500e+03 7.982945442199707031e-01 4.000000000000000000e+00 3.686542053222656250e+02 -7.175000000000000000e+01 4.925000000000000000e+01
6.600000000000000000e+01 1.097846153846154266e+03 4.487626953125000000e+02 -1.724517822265625000e+00 0.000000000000000000e+00 0.000000000000000000e+00 1.930133422851562500e+03 1.248808979988098145e+00 4.000000000000000000e+00 4.691609191894531250e+02 -7.125000000000000000e+01 4.925000000000000000e+01
5.600000000000000000e+01 1.086607692307692787e+03 4.620738525390625000e+02 -1.678955078125000000e+00 9.999999776482582092e-03 5.882353186607360840e-01 1.935918701171875000e+03 1.920350790023803711e+00 4.000000000000000000e+00 5.749169921875000000e+02 -7.075000000000000000e+01 4.925000000000000000e+01
5.600000000000000000e+01 1.081299999999999955e+03 4.725560913085937500e+02 -1.633361816406250000e+00 9.999999776482582092e-03 0.000000000000000000e+00 1.941703979492187500e+03 1.927409648895263672e+00 4.000000000000000000e+00 5.893591918945312500e+02 -7.025000000000000000e+01 4.925000000000000000e+01
6.500000000000000000e+01 1.064407692307692741e+03 4.841303710937500000e+02 -1.587799072265625000e+00 9.999999776482582092e-03 0.000000000000000000e+00 1.947489135742187500e+03 7.925474643707275391e-01 4.000000000000000000e+00 5.067434387207031250e+02 -6.975000000000000000e+01 4.925000000000000000e+01
5.700000000000000000e+01 1.099492307692308032e+03 4.872374877929687500e+02 -1.512359619140625000e+00 0.000000000000000000e+00 0.000000000000000000e+00 1.957735595703125000e+03 8.004487156867980957e-01 4.000000000000000000e+00 3.906955566406250000e+02 -6.925000000000000000e+01 4.925000000000000000e+01
6.000000000000000000e+01 1.081007692307691968e+03 4.964739074707031250e+02 -1.347473144531250000e+00 0.000000000000000000e+00 0.000000000000000000e+00 1.981365966796875000e+03 1.774352192878723145e+00 4.000000000000000000e+00 3.123943176269531250e+02 -6.875000000000000000e+01 4.925000000000000000e+01
2.600000000000000000e+01 1.144969230769231444e+03 5.746969604492187500e+02 2.671325683593750000e+00 0.000000000000000000e+00 0.000000000000000000e+00 1.973842041015625000e+03 1.965775966644287109e+00 3.000000000000000000e+00 2.326655883789062500e+02 -5.775000000000000000e+01 4.925000000000000000e+01
3.900000000000000000e+01 9.926692307692306940e+02 5.766830444335937500e+02 2.667694091796875000e+00 0.000000000000000000e+00 0.000000000000000000e+00 1.970360107421875000e+03 1.938250780105590820e+00 3.000000000000000000e+00 7.604179382324218750e+01 -5.725000000000000000e+01 4.925000000000000000e+01
5.400000000000000000e+01 1.011946153846153607e+03 5.690430297851562500e+02 2.664093017578125000e+00 0.000000000000000000e+00 0.000000000000000000e+00 1.966878295898437500e+03 1.882570624351501465e+00 4.000000000000000000e+00 4.239625854492187500e+02 -5.675000000000000000e+01 4.925000000000000000e+01
5.700000000000000000e+01 9.954384615384619792e+02 5.529704589843750000e+02 2.660491943359375000e+00 0.000000000000000000e+00 0.000000000000000000e+00 1.963396484375000000e+03 1.834379076957702637e+00 4.000000000000000000e+00 2.131301879882812500e+02 -5.625000000000000000e+01 4.925000000000000000e+01
5.800000000000000000e+01 1.063192307692308532e+03 5.699420166015625000e+02 2.985900878906250000e+00 0.000000000000000000e+00 0.000000000000000000e+00 1.978604736328125000e+03 2.018409252166748047e+00 4.000000000000000000e+00 5.556027603149414062e+01 -5.475000000000000000e+01 4.925000000000000000e+01
5.000000000000000000e+01 1.000115384615384642e+03 5.864233398437500000e+02 3.111480712890625000e+00 0.000000000000000000e+00 0.000000000000000000e+00 1.971827270507812500e+03 2.007260799407958984e+00 4.000000000000000000e+00 9.089691925048828125e+01 -5.425000000000000000e+01 4.925000000000000000e+01
2.800000000000000000e+01 5.458846153846155858e+02 2.751961059570312500e+02 1.220703125000000000e+00 0.000000000000000000e+00 5.882353186607360840e-01 2.809464111328125000e+03 3.544561862945556641e+00 3.000000000000000000e+00 3.664909362792968750e+02 -9.925000000000000000e+01 4.975000000000000000e+01
4.700000000000000000e+01 6.080692307692308987e+02 2.728659057617187500e+02 6.387023925781250000e-01 0.000000000000000000e+00 0.000000000000000000e+00 2.702358154296875000e+03 1.353362083435058594e+00 4.000000000000000000e+00 2.861039428710937500e+02 -9.625000000000000000e+01 4.975000000000000000e+01
6.400000000000000000e+01 6.003153846153848008e+02 2.573985595703125000e+02 4.609375000000000000e-01 0.000000000000000000e+00 3.529411852359771729e-01 2.668237548828125000e+03 2.811593770980834961e+00 4.000000000000000000e+00 3.082296447753906250e+02 -9.575000000000000000e+01 4.975000000000000000e+01
2.500000000000000000e+01 6.319846153846154948e+02 2.678446655273437500e+02 2.794494628906250000e-01 0.000000000000000000e+00 0.000000000000000000e+00 2.630720214843750000e+03 1.981481075286865234e+00 3.000000000000000000e+00 3.532848510742187500e+02 -9.525000000000000000e+01 4.975000000000000000e+01
5.400000000000000000e+01 7.042923076923073040e+02 3.560596008300781250e+02 -8.602905273437500000e-02 0.000000000000000000e+00 0.000000000000000000e+00 2.553421142578125000e+03 2.221317291259765625e+00 4.000000000000000000e+00 3.680946044921875000e+02 -9.425000000000000000e+01 4.975000000000000000e+01
5.200000000000000000e+01 7.693461538461535838e+02 3.687180786132812500e+02 -3.121032714843750000e-01 0.000000000000000000e+00 0.000000000000000000e+00 2.490046630859375000e+03 1.696764111518859863e+00 4.000000000000000000e+00 3.764473876953125000e+02 -9.325000000000000000e+01 4.975000000000000000e+01
5.900000000000000000e+01 8.092923076923082135e+02 3.804216308593750000e+02 -4.100341796875000000e-01 0.000000000000000000e+00 0.000000000000000000e+00 2.420236328125000000e+03 2.130308628082275391e+00 4.000000000000000000e+00 4.108291015625000000e+02 -9.175000000000000000e+01 4.975000000000000000e+01
3.200000000000000000e+01 8.251230769230770647e+02 3.734816589355468750e+02 -3.251342773437500000e-01 0.000000000000000000e+00 0.000000000000000000e+00 2.412970947265625000e+03 1.226900100708007812e+00 3.000000000000000000e+00 4.232942199707031250e+02 -9.125000000000000000e+01 4.975000000000000000e+01
6.300000000000000000e+01 8.269923076923078042e+02 3.586122436523437500e+02 -1.553039550781250000e-01 0.000000000000000000e+00 0.000000000000000000e+00 2.398439697265625000e+03 2.016369819641113281e+00 4.000000000000000000e+00 4.526364440917968750e+02 -9.025000000000000000e+01 4.975000000000000000e+01
3.400000000000000000e+01 8.188230769230772239e+02 3.442863464355468750e+02 -1.107482910156250000e-01 0.000000000000000000e+00 2.941176593303680420e-01 2.353338867187500000e+03 1.999331474304199219e+00 3.000000000000000000e+00 4.422583923339843750e+02 -8.975000000000000000e+01 4.975000000000000000e+01
6.700000000000000000e+01 7.867846153846151083e+02 3.701720581054687500e+02 -1.309204101562500000e-01 0.000000000000000000e+00 0.000000000000000000e+00 2.127083251953125000e+03 1.936460852622985840e+00 4.000000000000000000e+00 3.417568054199218750e+02 -8.775000000000000000e+01 4.975000000000000000e+01
3.800000000000000000e+01 7.707230769230767464e+02 3.897144165039062500e+02 -1.762390136718750000e-01 0.000000000000000000e+00 0.000000000000000000e+00 2.184799316406250000e+03 1.961840748786926270e+00 3.000000000000000000e+00 3.567284545898437500e+02 -8.725000000000000000e+01 4.975000000000000000e+01
6.000000000000000000e+01 7.631307692307693742e+02 3.979988098144531250e+02 -2.215270996093750000e-01 0.000000000000000000e+00 0.000000000000000000e+00 2.242515380859375000e+03 1.967552900314331055e+00 4.000000000000000000e+00 3.391959838867187500e+02 -8.675000000000000000e+01 4.975000000000000000e+01
3.800000000000000000e+01 7.690076923076923094e+02 4.022672729492187500e+02 -2.668457031250000000e-01 0.000000000000000000e+00 0.000000000000000000e+00 2.300231445312500000e+03 1.989164829254150391e+00 3.000000000000000000e+00 3.352409362792968750e+02 -8.625000000000000000e+01 4.975000000000000000e+01
3.000000000000000000e+01 7.343230769230768828e+02 4.037969360351562500e+02 -6.035156250000000000e-01 0.000000000000000000e+00 0.000000000000000000e+00 2.277732177734375000e+03 1.254659652709960938e+00 3.000000000000000000e+00 2.367754821777343750e+02 -8.525000000000000000e+01 4.975000000000000000e+01
5.700000000000000000e+01 7.155846153846157449e+02 4.018311767578125000e+02 -7.718505859375000000e-01 0.000000000000000000e+00 0.000000000000000000e+00 2.266482421875000000e+03 8.211613893508911133e-01 4.000000000000000000e+00 2.609778137207031250e+02 -8.475000000000000000e+01 4.975000000000000000e+01
4.300000000000000000e+01 7.747692307692303757e+02 4.121931762695312500e+02 -1.013275146484375000e+00 0.000000000000000000e+00 0.000000000000000000e+00 2.251428955078125000e+03 1.021412968635559082e+00 3.000000000000000000e+00 2.494102630615234375e+02 -8.375000000000000000e+01 4.975000000000000000e+01
6.800000000000000000e+01 8.006769230769233445e+02 4.253648681640625000e+02 -1.105407714843750000e+00 0.000000000000000000e+00 0.000000000000000000e+00 2.246135986328125000e+03 1.852591872215270996e+00 4.000000000000000000e+00 2.247770538330078125e+02 -8.325000000000000000e+01 4.975000000000000000e+01
6.400000000000000000e+01 7.995076923076920821e+02 4.360359191894531250e+02 -1.197540283203125000e+00 0.000000000000000000e+00 0.000000000000000000e+00 2.240843017578125000e+03 2.027420520782470703e+00 4.000000000000000000e+00 2.343563842773437500e+02 -8.275000000000000000e+01 4.975000000000000000e+01
5.700000000000000000e+01 7.812230769230772012e+02 4.381923217773437500e+02 -1.256927490234375000e+00 0.000000000000000000e+00 0.000000000000000000e+00 2.236559326171875000e+03 2.027818918228149414e+00 4.000000000000000000e+00 2.167595672607421875e+02 -8.225000000000000000e+01 4.975000000000000000e+01
3.800000000000000000e+01 8.048923076923080089e+02 4.367010192871093750e+02 -1.283569335937500000e+00 0.000000000000000000e+00 0.000000000000000000e+00 2.233285156250000000e+03 2.011918067932128906e+00 3.000000000000000000e+00 2.290163726806640625e+02 -8.175000000000000000e+01 4.975000000000000000e+01
5.600000000000000000e+01 7.781461538461536520e+02 4.373389282226562500e+02 -1.310211181640625000e+00 9.999999776482582092e-03 0.000000000000000000e+00 2.230010742187500000e+03 2.002232551574707031e+00 4.000000000000000000e+00 2.536879425048828125e+02 -8.125000000000000000e+01 4.975000000000000000e+01
6.700000000000000000e+01 7.955615384615387029e+02 4.394438781738281250e+02 -1.336853027343750000e+00 9.999999776482582092e-03 0.000000000000000000e+00 2.226736328125000000e+03 1.982048749923706055e+00 4.000000000000000000e+00 2.785103149414062500e+02 -8.075000000000000000e+01 4.975000000000000000e+01
4.800000000000000000e+01 8.109846153846156085e+02 4.451577148437500000e+02 -1.362884521484375000e+00 9.999999776482582092e-03 0.000000000000000000e+00 2.215592041015625000e+03 1.960560798645019531e+00 4.000000000000000000e+00 3.042842407226562500e+02 -8.025000000000000000e+01 4.975000000000000000e+01
6.200000000000000000e+01 7.834000000000002046e+02 4.496529541015625000e+02 -1.388732910156250000e+00 9.999999776482582092e-03 0.000000000000000000e+00 2.201823974609375000e+03 1.965013027191162109e+00 4.000000000000000000e+00 3.065294799804687500e+02 -7.975000000000000000e+01 4.975000000000000000e+01
2.200000000000000000e+01 7.979076923076930825e+02 4.494380187988281250e+02 -1.414550781250000000e+00 9.999999776482582092e-03 5.882352963089942932e-02 2.188056152343750000e+03 1.951460123062133789e+00 3.000000000000000000e+00 2.664639587402343750e+02 -7.925000000000000000e+01 4.975000000000000000e+01
5.000000000000000000e+01 8.156461538461541068e+02 4.473569335937500000e+02 -1.440399169921875000e+00 9.999999776482582092e-03 0.000000000000000000e+00 2.174288330078125000e+03 1.939147353172302246e+00 4.000000000000000000e+00 2.794148559570312500e+02 -7.875000000000000000e+01 4.975000000000000000e+01
6.000000000000000000e+01 8.192230769230772012e+02 4.439325561523437500e+02 -1.507812500000000000e+00 9.999999776482582092e-03 0.000000000000000000e+00 2.146956787109375000e+03 1.939950585365295410e+00 4.000000000000000000e+00 2.680431823730468750e+02 -7.825000000000000000e+01 4.975000000000000000e+01
5.200000000000000000e+01 8.235615384615383618e+02 4.411619873046875000e+02 -1.575256347656250000e+00 9.999999776482582092e-03 0.000000000000000000e+00 2.119625000000000000e+03 1.946288347244262695e+00 4.000000000000000000e+00 2.683289489746093750e+02 -7.775000000000000000e+01 4.975000000000000000e+01
4.400000000000000000e+01 8.403076923076927187e+02 4.577183532714843750e+02 -1.807769775390625000e+00 9.999999776482582092e-03 0.000000000000000000e+00 2.035338500976562500e+03 1.958413243293762207e+00 3.000000000000000000e+00 3.020298156738281250e+02 -7.625000000000000000e+01 4.975000000000000000e+01
6.000000000000000000e+01 8.437307692307695106e+02 4.807890014648437500e+02 -1.899383544921875000e+00 9.999999776482582092e-03 0.000000000000000000e+00 2.006173461914062500e+03 1.962711095809936523e+00 4.000000000000000000e+00 3.306724243164062500e+02 -7.575000000000000000e+01 4.975000000000000000e+01
5.600000000000000000e+01 8.969461538461536065e+02 5.026189880371093750e+02 -2.072387695312500000e+00 9.999999776482582092e-03 0.000000000000000000e+00 1.951080200195312500e+03 1.934033989906311035e+00 4.000000000000000000e+00 3.816011657714843750e+02 -7.475000000000000000e+01 4.975000000000000000e+01
4.200000000000000000e+01 8.494923076923071221e+02 4.739324035644531250e+02 -2.214691162109375000e+00 9.999999776482582092e-03 0.000000000000000000e+00 1.905697509765625000e+03 1.947341084480285645e+00 3.000000000000000000e+00 4.533539428710937500e+02 -7.375000000000000000e+01 4.975000000000000000e+01
4.500000000000000000e+01 8.595846153846155175e+02 4.435782775878906250e+02 -2.285827636718750000e+00 9.999999776482582092e-03 8.823529481887817383e-01 1.883006103515625000e+03 1.951697826385498047e+00 4.000000000000000000e+00 3.982277526855468750e+02 -7.325000000000000000e+01 4.975000000000000000e+01
4.700000000000000000e+01 8.707461538461537884e+02 4.408283691406250000e+02 -2.299407958984375000e+00 9.999999776482582092e-03 9.411764740943908691e-01 1.869687377929687500e+03 1.957413792610168457e+00 4.000000000000000000e+00 3.992044067382812500e+02 -7.275000000000000000e+01 4.975000000000000000e+01
6.200000000000000000e+01 9.015230769230771557e+02 4.548774414062500000e+02 -2.293792724609375000e+00 9.999999776482582092e-03 8.823529481887817383e-01 1.859492797851562500e+03 1.279251337051391602e+00 4.000000000000000000e+00 4.625705566406250000e+02 -7.225000000000000000e+01 4.975000000000000000e+01
6.300000000000000000e+01 1.002930769230768647e+03 4.679006347656250000e+02 -2.282592773437500000e+00 9.999999776482582092e-03 0.000000000000000000e+00 1.839103515625000000e+03 1.892206907272338867e+00 4.000000000000000000e+00 3.762293090820312500e+02 -7.125000000000000000e+01 4.975000000000000000e+01
5.800000000000000000e+01 1.013338461538461843e+03 4.781552429199218750e+02 -2.172180175781250000e+00 9.999999776482582092e-03 2.941176593303680420e-01 1.846230346679687500e+03 1.905971765518188477e+00 4.000000000000000000e+00 4.203083496093750000e+02 -7.025000000000000000e+01 4.975000000000000000e+01
5.300000000000000000e+01 1.021176923076923003e+03 4.911379089355468750e+02 -2.116973876953125000e+00 9.999999776482582092e-03 0.000000000000000000e+00 1.849793701171875000e+03 1.915084004402160645e+00 4.000000000000000000e+00 4.721861877441406250e+02 -6.975000000000000000e+01 4.975000000000000000e+01
4.700000000000000000e+01 1.063730769230769283e+03 4.922623596191406250e+02 -2.039581298828125000e+00 9.999999776482582092e-03 0.000000000000000000e+00 1.857255615234375000e+03 1.918782591819763184e+00 4.000000000000000000e+00 4.650480957031250000e+02 -6.925000000000000000e+01 4.975000000000000000e+01
5.800000000000000000e+01 1.112469230769230762e+03 5.017611083984375000e+02 -1.895660400390625000e+00 9.999999776482582092e-03 0.000000000000000000e+00 1.876413208007812500e+03 1.481661796569824219e+00 4.000000000000000000e+00 3.908692932128906250e+02 -6.875000000000000000e+01 4.975000000000000000e+01
6.900000000000000000e+01 1.151569230769230671e+03 5.096612548828125000e+02 -1.751739501953125000e+00 0.000000000000000000e+00 0.000000000000000000e+00 1.895570800781250000e+03 1.205775856971740723e+00 4.000000000000000000e+00 2.400180816650390625e+02 -6.825000000000000000e+01 4.975000000000000000e+01
5.200000000000000000e+01 1.183307692307692150e+03 5.241023559570312500e+02 -1.607788085937500000e+00 9.999999776482582092e-03 0.000000000000000000e+00 1.914728393554687500e+03 8.845574855804443359e-01 4.000000000000000000e+00 3.959343872070312500e+02 -6.775000000000000000e+01 4.975000000000000000e+01
3.600000000000000000e+01 1.102038461538461206e+03 5.454369506835937500e+02 2.111419677734375000e+00 0.000000000000000000e+00 0.000000000000000000e+00 1.801293579101562500e+03 1.417906641960144043e+00 3.000000000000000000e+00 4.213221435546875000e+02 -5.725000000000000000e+01 4.975000000000000000e+01
6.100000000000000000e+01 1.013200000000000045e+03 4.674744873046875000e+02 2.129089355468750000e+00 0.000000000000000000e+00 0.000000000000000000e+00 1.778884765625000000e+03 1.911160230636596680e+00 4.000000000000000000e+00 2.192006835937500000e+02 -5.625000000000000000e+01 4.975000000000000000e+01
5.000000000000000000e+00 5.178076923076923777e+02 2.913845520019531250e+02 7.048950195312500000e-01 0.000000000000000000e+00 1.000000000000000000e+00 2.709289550781250000e+03 3.319294691085815430e+00 1.000000000000000000e+00 5.362920532226562500e+02 -9.975000000000000000e+01 5.025000000000000000e+01
7.000000000000000000e+00 5.623384615384616154e+02 3.082626037597656250e+02 7.152709960937500000e-01 0.000000000000000000e+00 1.352941155433654785e+00 2.711467041015625000e+03 3.498886108398437500e+00 1.000000000000000000e+00 2.693195800781250000e+02 -9.875000000000000000e+01 5.025000000000000000e+01
5.100000000000000000e+01 5.888461538461536975e+02 2.925363159179687500e+02 1.934204101562500000e-01 0.000000000000000000e+00 1.882352948188781738e+00 2.614773925781250000e+03 3.475214004516601562e+00 4.000000000000000000e+00 2.620137329101562500e+02 -9.625000000000000000e+01 5.025000000000000000e+01
3.400000000000000000e+01 5.690769230769235492e+02 2.880419921875000000e+02 3.683471679687500000e-02 0.000000000000000000e+00 0.000000000000000000e+00 2.583526367187500000e+03 1.767179250717163086e+00 3.000000000000000000e+00 2.873534240722656250e+02 -9.575000000000000000e+01 5.025000000000000000e+01
3.600000000000000000e+01 7.404000000000006594e+02 3.587026062011718750e+02 -7.033386230468750000e-01 0.000000000000000000e+00 0.000000000000000000e+00 2.430485351562500000e+03 2.173440694808959961e+00 3.000000000000000000e+00 3.518890686035156250e+02 -9.375000000000000000e+01 5.025000000000000000e+01
5.400000000000000000e+01 7.738538461538462343e+02 3.591781921386718750e+02 -7.624816894531250000e-01 0.000000000000000000e+00 0.000000000000000000e+00 2.405008300781250000e+03 1.475156188011169434e+00 4.000000000000000000e+00 3.879830017089843750e+02 -9.325000000000000000e+01 5.025000000000000000e+01
4.100000000000000000e+01 8.297769230769231399e+02 3.935461120605468750e+02 -8.770446777343750000e-01 0.000000000000000000e+00 0.000000000000000000e+00 2.320195068359375000e+03 1.804097294807434082e+00 3.000000000000000000e+00 4.014730224609375000e+02 -9.125000000000000000e+01 5.025000000000000000e+01
6.800000000000000000e+01 8.326769230769234582e+02 3.773595275878906250e+02 -8.385314941406250000e-01 0.000000000000000000e+00 0.000000000000000000e+00 2.308394287109375000e+03 1.964043498039245605e+00 4.000000000000000000e+00 4.446458435058593750e+02 -9.075000000000000000e+01 5.025000000000000000e+01
6.300000000000000000e+01 8.125999999999999091e+02 3.257697753906250000e+02 -7.849121093750000000e-01 0.000000000000000000e+00 2.352941185235977173e-01 2.273667236328125000e+03 1.985110521316528320e+00 4.000000000000000000e+00 4.269435424804687500e+02 -8.975000000000000000e+01 5.025000000000000000e+01
5.800000000000000000e+01 7.443615384615386574e+02 3.862264709472656250e+02 -9.557189941406250000e-01 9.999999776482582092e-03 0.000000000000000000e+00 2.181265380859375000e+03 1.135110855102539062e+00 4.000000000000000000e+00 3.257294311523437500e+02 -8.725000000000000000e+01 5.025000000000000000e+01
5.200000000000000000e+01 7.380692307692311260e+02 3.948738403320312500e+02 -1.038055419921875000e+00 9.999999776482582092e-03 0.000000000000000000e+00 2.191703613281250000e+03 1.962842345237731934e+00 4.000000000000000000e+00 3.208587646484375000e+02 -8.675000000000000000e+01 5.025000000000000000e+01
4.500000000000000000e+01 7.242769230769233673e+02 3.976549987792968750e+02 -1.120422363281250000e+00 9.999999776482582092e-03 0.000000000000000000e+00 2.202142089843750000e+03 1.620854377746582031e+00 4.000000000000000000e+00 2.951089477539062500e+02 -8.625000000000000000e+01 5.025000000000000000e+01
6.800000000000000000e+01 7.219846153846149264e+02 3.990342102050781250e+02 -1.235992431640625000e+00 0.000000000000000000e+00 0.000000000000000000e+00 2.197200195312500000e+03 8.131636381149291992e-01 4.000000000000000000e+00 2.240104522705078125e+02 -8.575000000000000000e+01 5.025000000000000000e+01
6.700000000000000000e+01 7.077153846153844370e+02 4.012797546386718750e+02 -1.351593017578125000e+00 0.000000000000000000e+00 0.000000000000000000e+00 2.192258544921875000e+03 1.466704726219177246e+00 4.000000000000000000e+00 1.768047943115234375e+02 -8.525000000000000000e+01 5.025000000000000000e+01
6.700000000000000000e+01 6.974384615384616382e+02 4.036521606445312500e+02 -1.467193603515625000e+00 0.000000000000000000e+00 0.000000000000000000e+00 2.187316894531250000e+03 1.718964338302612305e+00 4.000000000000000000e+00 1.425098724365234375e+02 -8.475000000000000000e+01 5.025000000000000000e+01
1.500000000000000000e+01 7.010692307692310123e+02 4.087977600097656250e+02 -1.556182861328125000e+00 0.000000000000000000e+00 0.000000000000000000e+00 2.184046630859375000e+03 1.670536398887634277e+00 1.000000000000000000e+00 1.053403091430664062e+02 -8.425000000000000000e+01 5.025000000000000000e+01
6.900000000000000000e+01 7.279230769230773603e+02 4.142916564941406250e+02 -1.565246582031250000e+00 0.000000000000000000e+00 0.000000000000000000e+00 2.185790771484375000e+03 1.836229920387268066e+00 4.000000000000000000e+00 1.735150604248046875e+02 -8.375000000000000000e+01 5.025000000000000000e+01
5.800000000000000000e+01 7.406384615384615699e+02 4.205897521972656250e+02 -1.574340820312500000e+00 0.000000000000000000e+00 0.000000000000000000e+00 2.187535156250000000e+03 2.013351678848266602e+00 4.000000000000000000e+00 1.664856567382812500e+02 -8.325000000000000000e+01 5.025000000000000000e+01
6.000000000000000000e+00 7.434999999999998863e+02 4.238979187011718750e+02 -1.581359863281250000e+00 0.000000000000000000e+00 0.000000000000000000e+00 2.189467041015625000e+03 2.036356687545776367e+00 1.000000000000000000e+00 1.001376342773437500e+02 -8.225000000000000000e+01 5.025000000000000000e+01
4.000000000000000000e+01 7.427307692307692832e+02 4.187189636230468750e+02 -1.568054199218750000e+00 0.000000000000000000e+00 0.000000000000000000e+00 2.188098388671875000e+03 2.018383979797363281e+00 3.000000000000000000e+00 1.031742706298828125e+02 -8.175000000000000000e+01 5.025000000000000000e+01
3.300000000000000000e+01 7.439461538461538339e+02 4.067474975585937500e+02 -1.554779052734375000e+00 9.999999776482582092e-03 0.000000000000000000e+00 2.186729736328125000e+03 1.994121909141540527e+00 3.000000000000000000e+00 1.849921569824218750e+02 -8.125000000000000000e+01 5.025000000000000000e+01
5.700000000000000000e+01 7.369846153846153811e+02 3.945684204101562500e+02 -1.541503906250000000e+00 9.999999776482582092e-03 0.000000000000000000e+00 2.185360839843750000e+03 1.974457144737243652e+00 4.000000000000000000e+00 2.395321960449218750e+02 -8.075000000000000000e+01 5.025000000000000000e+01
4.800000000000000000e+01 7.524307692307691013e+02 3.956373596191406250e+02 -1.609069824218750000e+00 9.999999776482582092e-03 0.000000000000000000e+00 2.157020996093750000e+03 1.938115000724792480e+00 4.000000000000000000e+00 2.690936279296875000e+02 -7.975000000000000000e+01 5.025000000000000000e+01
2.500000000000000000e+01 7.565307692307693515e+02 4.149326477050781250e+02 -1.649566650390625000e+00 9.999999776482582092e-03 5.882352963089942932e-02 2.141022216796875000e+03 7.859046459197998047e-01 3.000000000000000000e+00 2.536848297119140625e+02 -7.925000000000000000e+01 5.025000000000000000e+01
5.800000000000000000e+01 7.699230769230767919e+02 4.263926086425781250e+02 -1.690063476562500000e+00 9.999999776482582092e-03 6.470588445663452148e-01 2.125023681640625000e+03 1.186261773109436035e+00 4.000000000000000000e+00 2.777930603027343750e+02 -7.875000000000000000e+01 5.025000000000000000e+01
4.200000000000000000e+01 7.836615384615383846e+02 4.328243103027343750e+02 -1.811859130859375000e+00 9.999999776482582092e-03 0.000000000000000000e+00 2.092278076171875000e+03 1.003309369087219238e+00 3.000000000000000000e+00 2.619602050781250000e+02 -7.825000000000000000e+01 5.025000000000000000e+01
2.800000000000000000e+01 7.961461538461537657e+02 4.358418273925781250e+02 -1.933685302734375000e+00 9.999999776482582092e-03 0.000000000000000000e+00 2.059532470703125000e+03 1.536647200584411621e+00 3.000000000000000000e+00 2.560854492187500000e+02 -7.775000000000000000e+01 5.025000000000000000e+01
4.100000000000000000e+01 8.124769230769229580e+02 4.377636108398437500e+02 -2.055480957031250000e+00 9.999999776482582092e-03 0.000000000000000000e+00 2.026786865234375000e+03 1.909842729568481445e+00 3.000000000000000000e+00 2.616852416992187500e+02 -7.725000000000000000e+01 5.025000000000000000e+01
5.200000000000000000e+01 8.184384615384612971e+02 4.591891784667968750e+02 -2.313140869140625000e+00 9.999999776482582092e-03 1.000000000000000000e+00 1.961993774414062500e+03 1.926665902137756348e+00 4.000000000000000000e+00 3.295102233886718750e+02 -7.625000000000000000e+01 5.025000000000000000e+01
2.300000000000000000e+01 8.455923076923082817e+02 4.833535766601562500e+02 -2.446166992187500000e+00 9.999999776482582092e-03 5.882353186607360840e-01 1.929806640625000000e+03 1.926473975181579590e+00 3.000000000000000000e+00 3.473002319335937500e+02 -7.575000000000000000e+01 5.025000000000000000e+01
6.600000000000000000e+01 8.784538461538465981e+02 5.025746459960937500e+02 -2.685424804687500000e+00 9.999999776482582092e-03 2.941176593303680420e-01 1.869093627929687500e+03 1.393818616867065430e+00 4.000000000000000000e+00 3.796215209960937500e+02 -7.475000000000000000e+01 5.025000000000000000e+01
2.400000000000000000e+01 8.836923076923077360e+02 5.016830749511718750e+02 -2.764801025390625000e+00 9.999999776482582092e-03 0.000000000000000000e+00 1.844229003906250000e+03 1.103775382041931152e+00 3.000000000000000000e+00 4.023025512695312500e+02 -7.425000000000000000e+01 5.025000000000000000e+01
5.300000000000000000e+01 8.959307692307691013e+02 4.898930358886718750e+02 -2.844207763671875000e+00 1.030258163809776306e-01 2.941176593303680420e-01 1.819364379882812500e+03 1.811505556106567383e+00 4.000000000000000000e+00 4.420063781738281250e+02 -7.375000000000000000e+01 5.025000000000000000e+01
5.400000000000000000e+01 9.149384615384623203e+02 4.709154052734375000e+02 -2.923614501953125000e+00 9.999999776482582092e-03 0.000000000000000000e+00 1.794499877929687500e+03 1.861022830009460449e+00 4.000000000000000000e+00 4.498727722167968750e+02 -7.325000000000000000e+01 5.025000000000000000e+01
5.500000000000000000e+01 9.303538461538466890e+02 4.592142028808593750e+02 -2.922882080078125000e+00 1.045278161764144897e-01 6.470588445663452148e-01 1.780241699218750000e+03 1.588185787200927734e+00 4.000000000000000000e+00 4.514704284667968750e+02 -7.275000000000000000e+01 5.025000000000000000e+01
6.900000000000000000e+01 1.003523076923077269e+03 4.516660461425781250e+02 -2.868072509765625000e+00 1.776345223188400269e-01 6.470588445663452148e-01 1.758796264648437500e+03 1.806645035743713379e+00 4.000000000000000000e+00 6.245886840820312500e+02 -7.175000000000000000e+01 5.025000000000000000e+01
4.300000000000000000e+01 9.947769230769229125e+02 4.536697387695312500e+02 -2.775817871093750000e+00 1.329844295978546143e-01 2.941176593303680420e-01 1.749415161132812500e+03 1.826298594474792480e+00 3.000000000000000000e+00 5.385020141601562500e+02 -7.075000000000000000e+01 5.025000000000000000e+01
6.000000000000000000e+01 1.028446153846153720e+03 4.546351318359375000e+02 -2.710998535156250000e+00 1.335572302341461182e-01 2.941176593303680420e-01 1.750756713867187500e+03 1.826424717903137207e+00 4.000000000000000000e+00 6.035090942382812500e+02 -7.025000000000000000e+01 5.025000000000000000e+01
5.400000000000000000e+01 1.034361538461538430e+03 4.596755371093750000e+02 -2.646148681640625000e+00 9.999999776482582092e-03 0.000000000000000000e+00 1.752098266601562500e+03 1.842605710029602051e+00 4.000000000000000000e+00 5.490084228515625000e+02 -6.975000000000000000e+01 5.025000000000000000e+01
6.400000000000000000e+01 1.107461538461538112e+03 4.941447448730468750e+02 -2.443847656250000000e+00 1.102127730846405029e-01 0.000000000000000000e+00 1.771460571289062500e+03 1.871564984321594238e+00 4.000000000000000000e+00 5.236289062500000000e+02 -6.875000000000000000e+01 5.025000000000000000e+01
2.800000000000000000e+01 1.146507692307692651e+03 5.132465209960937500e+02 -2.320892333984375000e+00 9.999999776482582092e-03 2.941176593303680420e-01 1.786145385742187500e+03 1.840444922447204590e+00 3.000000000000000000e+00 4.812283325195312500e+02 -6.825000000000000000e+01 5.025000000000000000e+01
5.700000000000000000e+01 1.199653846153845507e+03 5.271332397460937500e+02 -2.197967529296875000e+00 9.999999776482582092e-03 0.000000000000000000e+00 1.800830200195312500e+03 1.828104972839355469e+00 4.000000000000000000e+00 5.812657470703125000e+02 -6.775000000000000000e+01 5.025000000000000000e+01
7.000000000000000000e+01 1.222584615384615972e+03 5.355349731445312500e+02 -2.011657714843750000e+00 9.999999776482582092e-03 0.000000000000000000e+00 1.819136962890625000e+03 9.242001771926879883e-01 4.000000000000000000e+00 4.546514892578125000e+02 -6.725000000000000000e+01 5.025000000000000000e+01
5.800000000000000000e+01 1.081500000000000227e+03 5.119077453613281250e+02 1.555145263671875000e+00 0.000000000000000000e+00 0.000000000000000000e+00 1.632227050781250000e+03 1.274054050445556641e+00 4.000000000000000000e+00 2.671199645996093750e+02 -5.725000000000000000e+01 5.025000000000000000e+01
5.500000000000000000e+01 1.094469230769230990e+03 5.139711914062500000e+02 1.576416015625000000e+00 0.000000000000000000e+00 0.000000000000000000e+00 1.613300170898437500e+03 1.524408698081970215e+00 4.000000000000000000e+00 3.764827270507812500e+02 -5.675000000000000000e+01 5.025000000000000000e+01
6.200000000000000000e+01 5.573769230769229353e+02 2.713637390136718750e+02 3.733520507812500000e-01 0.000000000000000000e+00 2.352941185235977173e-01 2.641039306640625000e+03 9.145859479904174805e-01 4.000000000000000000e+00 6.901782226562500000e+02 -9.975000000000000000e+01 5.075000000000000000e+01
2.200000000000000000e+01 5.415307692307693515e+02 2.741268920898437500e+02 4.304504394531250000e-01 0.000000000000000000e+00 2.941176593303680420e-01 2.649975830078125000e+03 2.879628658294677734e+00 3.000000000000000000e+00 3.066116333007812500e+02 -9.925000000000000000e+01 5.075000000000000000e+01
2.300000000000000000e+01 5.350076923076923094e+02 2.690776672363281250e+02 2.544860839843750000e-01 0.000000000000000000e+00 2.352941185235977173e-01 2.630026123046875000e+03 3.420057535171508789e+00 3.000000000000000000e+00 2.742057800292968750e+02 -9.775000000000000000e+01 5.075000000000000000e+01
5.300000000000000000e+01 5.950923076923077133e+02 2.830734252929687500e+02 -3.453063964843750000e-01 0.000000000000000000e+00 0.000000000000000000e+00 2.513784667968750000e+03 9.010481834411621094e-01 4.000000000000000000e+00 2.980043334960937500e+02 -9.575000000000000000e+01 5.075000000000000000e+01
4.800000000000000000e+01 6.860692307692307850e+02 2.876994323730468750e+02 -8.962402343750000000e-01 0.000000000000000000e+00 0.000000000000000000e+00 2.401716064453125000e+03 1.226295709609985352e+00 4.000000000000000000e+00 3.873338012695312500e+02 -9.425000000000000000e+01 5.075000000000000000e+01
5.400000000000000000e+01 7.320538461538465071e+02 2.810459594726562500e+02 -1.081756591796875000e+00 0.000000000000000000e+00 0.000000000000000000e+00 2.363896728515625000e+03 1.336266398429870605e+00 4.000000000000000000e+00 3.902479248046875000e+02 -9.375000000000000000e+01 5.075000000000000000e+01
6.400000000000000000e+01 7.743923076923080089e+02 2.901501770019531250e+02 -1.154754638671875000e+00 0.000000000000000000e+00 0.000000000000000000e+00 2.337639160156250000e+03 1.261746644973754883e+00 4.000000000000000000e+00 3.757003173828125000e+02 -9.325000000000000000e+01 5.075000000000000000e+01
6.300000000000000000e+01 7.913615384615385437e+02 3.216437377929687500e+02 -1.227752685546875000e+00 0.000000000000000000e+00 0.000000000000000000e+00 2.311381835937500000e+03 1.342352271080017090e+00 4.000000000000000000e+00 4.201398315429687500e+02 -9.275000000000000000e+01 5.075000000000000000e+01
5.800000000000000000e+01 8.071999999999997044e+02 3.560328063964843750e+02 -1.300720214843750000e+00 0.000000000000000000e+00 0.000000000000000000e+00 2.285124511718750000e+03 8.588914871215820312e-01 4.000000000000000000e+00 4.399709472656250000e+02 -9.225000000000000000e+01 5.075000000000000000e+01
6.000000000000000000e+01 8.297307692307695106e+02 3.726782836914062500e+02 -1.355712890625000000e+00 0.000000000000000000e+00 5.882352963089942932e-02 2.261667968750000000e+03 1.475813269615173340e+00 4.000000000000000000e+00 3.974946899414062500e+02 -9.175000000000000000e+01 5.075000000000000000e+01
6.100000000000000000e+01 8.171384615384612289e+02 2.987705078125000000e+02 -1.374359130859375000e+00 9.999999776482582092e-03 5.294117927551269531e-01 2.202395751953125000e+03 1.965211153030395508e+00 4.000000000000000000e+00 3.753635864257812500e+02 -8.975000000000000000e+01 5.075000000000000000e+01
3.300000000000000000e+01 7.912307692307693969e+02 2.930891723632812500e+02 -1.404876708984375000e+00 9.999999776482582092e-03 5.294117927551269531e-01 2.189227050781250000e+03 7.943789362907409668e-01 3.000000000000000000e+00 3.765173950195312500e+02 -8.925000000000000000e+01 5.075000000000000000e+01
5.300000000000000000e+01 7.520000000000000000e+02 3.232758178710937500e+02 -1.465911865234375000e+00 9.999999776482582092e-03 0.000000000000000000e+00 2.162890136718750000e+03 7.913038730621337891e-01 4.000000000000000000e+00 3.374079895019531250e+02 -8.825000000000000000e+01 5.075000000000000000e+01
4.600000000000000000e+01 7.365076923076924231e+02 3.452514648437500000e+02 -1.543914794921875000e+00 9.999999776482582092e-03 2.352941185235977173e-01 2.151469726562500000e+03 7.919994592666625977e-01 4.000000000000000000e+00 3.156413879394531250e+02 -8.775000000000000000e+01 5.075000000000000000e+01
5.000000000000000000e+01 7.288692307692302847e+02 3.642797851562500000e+02 -1.637786865234375000e+00 9.999999776482582092e-03 0.000000000000000000e+00 2.140631835937500000e+03 7.929403185844421387e-01 4.000000000000000000e+00 2.930101318359375000e+02 -8.725000000000000000e+01 5.075000000000000000e+01
3.800000000000000000e+01 7.236769230769233445e+02 3.779062805175781250e+02 -1.731658935546875000e+00 9.999999776482582092e-03 0.000000000000000000e+00 2.129793945312500000e+03 7.971828579902648926e-01 3.000000000000000000e+00 2.756517639160156250e+02 -8.675000000000000000e+01 5.075000000000000000e+01
7.300000000000000000e+01 7.072769230769229125e+02 3.860007019042968750e+02 -1.825531005859375000e+00 9.999999776482582092e-03 0.000000000000000000e+00 2.118956298828125000e+03 7.991359233856201172e-01 4.000000000000000000e+00 2.437301483154296875e+02 -8.625000000000000000e+01 5.075000000000000000e+01
5.500000000000000000e+01 6.961307692307689194e+02 3.913004150390625000e+02 -1.892486572265625000e+00 9.999999776482582092e-03 1.176470592617988586e-01 2.117810791015625000e+03 1.568650126457214355e+00 4.000000000000000000e+00 1.853336334228515625e+02 -8.575000000000000000e+01 5.075000000000000000e+01
5.800000000000000000e+01 6.843615384615385437e+02 3.964750671386718750e+02 -1.959442138671875000e+00 0.000000000000000000e+00 0.000000000000000000e+00 2.116665283203125000e+03 1.855738878250122070e+00 4.000000000000000000e+00 1.551781311035156250e+02 -8.525000000000000000e+01 5.075000000000000000e+01
6.100000000000000000e+01 6.831307692307692605e+02 4.020956420898437500e+02 -2.026367187500000000e+00 0.000000000000000000e+00 0.000000000000000000e+00 2.115519775390625000e+03 1.553058862686157227e+00 4.000000000000000000e+00 1.339120788574218750e+02 -8.475000000000000000e+01 5.075000000000000000e+01
2.300000000000000000e+01 6.748384615384615017e+02 4.083944702148437500e+02 -2.062835693359375000e+00 0.000000000000000000e+00 0.000000000000000000e+00 2.116220947265625000e+03 1.998725771903991699e+00 3.000000000000000000e+00 1.064923095703125000e+02 -8.425000000000000000e+01 5.075000000000000000e+01
6.000000000000000000e+01 6.858384615384612744e+02 4.111935119628906250e+02 -2.007812500000000000e+00 0.000000000000000000e+00 0.000000000000000000e+00 2.122462890625000000e+03 1.980317711830139160e+00 4.000000000000000000e+00 1.116545715332031250e+02 -8.375000000000000000e+01 5.075000000000000000e+01
1.100000000000000000e+01 6.940692307692307850e+02 4.101796875000000000e+02 -1.952789306640625000e+00 9.999999776482582092e-03 0.000000000000000000e+00 2.128704833984375000e+03 1.979990601539611816e+00 1.000000000000000000e+00 1.626307373046875000e+02 -8.325000000000000000e+01 5.075000000000000000e+01
3.300000000000000000e+01 6.904230769230769056e+02 4.035644226074218750e+02 -1.897796630859375000e+00 9.999999776482582092e-03 5.882352963089942932e-02 2.134947021484375000e+03 1.995359778404235840e+00 3.000000000000000000e+00 1.600920257568359375e+02 -8.275000000000000000e+01 5.075000000000000000e+01
4.700000000000000000e+01 6.967846153846154493e+02 3.922189025878906250e+02 -1.889465332031250000e+00 9.999999776482582092e-03 0.000000000000000000e+00 2.121251464843750000e+03 1.990760087966918945e+00 4.000000000000000000e+00 9.315466308593750000e+01 -8.225000000000000000e+01 5.075000000000000000e+01
1.400000000000000000e+01 7.058615384615386574e+02 3.784579772949218750e+02 -1.927886962890625000e+00 9.999999776482582092e-03 0.000000000000000000e+00 2.087618652343750000e+03 1.967535734176635742e+00 1.000000000000000000e+00 6.344881820678710938e+01 -8.175000000000000000e+01 5.075000000000000000e+01
1.600000000000000000e+01 7.023615384615385437e+02 3.517676391601562500e+02 -2.004669189453125000e+00 9.999999776482582092e-03 5.882352963089942932e-02 2.020353149414062500e+03 1.926719188690185547e+00 1.000000000000000000e+00 6.465886688232421875e+01 -8.075000000000000000e+01 5.075000000000000000e+01
5.600000000000000000e+01 7.007461538461537884e+02 3.464907531738281250e+02 -1.988128662109375000e+00 9.999999776482582092e-03 0.000000000000000000e+00 2.025454711914062500e+03 1.918255090713500977e+00 4.000000000000000000e+00 1.213530960083007812e+02 -8.025000000000000000e+01 5.075000000000000000e+01
9.000000000000000000e+00 7.054846153846151537e+02 3.534559936523437500e+02 -1.953247070312500000e+00 9.999999776482582092e-03 5.882352963089942932e-02 2.043467651367187500e+03 1.915175437927246094e+00 1.000000000000000000e+00 5.528144073486328125e+01 -7.975000000000000000e+01 5.075000000000000000e+01
4.900000000000000000e+01 7.123461538461540385e+02 3.724966735839843750e+02 -1.918395996093750000e+00 9.999999776482582092e-03 0.000000000000000000e+00 2.061480712890625000e+03 1.659151673316955566e+00 4.000000000000000000e+00 7.659990692138671875e+01 -7.925000000000000000e+01 5.075000000000000000e+01
4.900000000000000000e+01 7.194923076923075769e+02 3.964537353515625000e+02 -1.883514404296875000e+00 9.999999776482582092e-03 0.000000000000000000e+00 2.079493652343750000e+03 7.818427085876464844e-01 4.000000000000000000e+00 1.512087402343750000e+02 -7.875000000000000000e+01 5.075000000000000000e+01
4.600000000000000000e+01 7.366615384615386120e+02 4.161082458496093750e+02 -2.049438476562500000e+00 9.999999776482582092e-03 0.000000000000000000e+00 2.042656982421875000e+03 7.798042297363281250e-01 4.000000000000000000e+00 2.064480590820312500e+02 -7.825000000000000000e+01 5.075000000000000000e+01
4.900000000000000000e+01 7.589846153846153811e+02 4.298748474121093750e+02 -2.215362548828125000e+00 9.999999776482582092e-03 0.000000000000000000e+00 2.005820312500000000e+03 7.725032567977905273e-01 4.000000000000000000e+00 2.432402648925781250e+02 -7.775000000000000000e+01 5.075000000000000000e+01
6.100000000000000000e+01 8.019230769230770193e+02 4.443924255371093750e+02 -2.548004150390625000e+00 9.999999776482582092e-03 0.000000000000000000e+00 1.932687255859375000e+03 1.876116156578063965e+00 4.000000000000000000e+00 2.697831726074218750e+02 -7.675000000000000000e+01 5.075000000000000000e+01
6.000000000000000000e+01 8.076076923076924459e+02 4.591826171875000000e+02 -2.717193603515625000e+00 9.999999776482582092e-03 5.882352963089942932e-02 1.898012451171875000e+03 1.696277737617492676e+00 4.000000000000000000e+00 2.782084350585937500e+02 -7.625000000000000000e+01 5.075000000000000000e+01
2.500000000000000000e+01 8.333153846153848008e+02 4.813179321289062500e+02 -2.886352539062500000e+00 9.999999776482582092e-03 6.470588445663452148e-01 1.863337646484375000e+03 7.654276490211486816e-01 3.000000000000000000e+00 3.105252075195312500e+02 -7.575000000000000000e+01 5.075000000000000000e+01
3.000000000000000000e+01 8.349846153846156085e+02 4.981842956542968750e+02 -3.055541992187500000e+00 9.999999776482582092e-03 9.411764740943908691e-01 1.828662841796875000e+03 8.167186379432678223e-01 3.000000000000000000e+00 3.307462158203125000e+02 -7.525000000000000000e+01 5.075000000000000000e+01
4.600000000000000000e+01 8.945769230769230944e+02 4.734252319335937500e+02 -3.445220947265625000e+00 1.513962000608444214e-01 0.000000000000000000e+00 1.720282714843750000e+03 1.270537257194519043e+00 4.000000000000000000e+00 4.876656494140625000e+02 -7.325000000000000000e+01 5.075000000000000000e+01
3.800000000000000000e+01 9.037307692307695106e+02 4.476931152343750000e+02 -3.437866210937500000e+00 1.554817110300064087e-01 0.000000000000000000e+00 1.704929321289062500e+03 7.915663719177246094e-01 3.000000000000000000e+00 5.281895751953125000e+02 -7.275000000000000000e+01 5.075000000000000000e+01
2.400000000000000000e+01 9.250538461538459387e+02 4.286358642578125000e+02 -3.399047851562500000e+00 1.782589107751846313e-01 2.941176593303680420e-01 1.693128906250000000e+03 7.309967875480651855e-01 3.000000000000000000e+00 5.387216186523437500e+02 -7.225000000000000000e+01 5.075000000000000000e+01
5.100000000000000000e+01 9.627307692307699654e+02 4.124972839355468750e+02 -3.360229492187500000e+00 1.814021319150924683e-01 6.470588445663452148e-01 1.681328613281250000e+03 7.218065857887268066e-01 4.000000000000000000e+00 5.363314208984375000e+02 -7.175000000000000000e+01 5.075000000000000000e+01
1.200000000000000000e+01 9.391923076923079634e+02 3.943440246582031250e+02 -3.321380615234375000e+00 1.242327764630317688e-01 5.882353186607360840e-01 1.669528198242187500e+03 1.028936386108398438e+00 1.000000000000000000e+00 4.574375305175781250e+02 -7.125000000000000000e+01 5.075000000000000000e+01
4.900000000000000000e+01 9.549769230769232990e+02 4.001877746582031250e+02 -3.257263183593750000e+00 1.329262256622314453e-01 6.470588445663452148e-01 1.668478515625000000e+03 9.205482006072998047e-01 4.000000000000000000e+00 5.048030090332031250e+02 -7.075000000000000000e+01 5.075000000000000000e+01
5.100000000000000000e+01 1.090830769230769192e+03 4.280179443359375000e+02 -3.128997802734375000e+00 2.656746506690979004e-01 0.000000000000000000e+00 1.666379028320312500e+03 1.746395945549011230e+00 4.000000000000000000e+00 7.426630249023437500e+02 -6.975000000000000000e+01 5.075000000000000000e+01
4.800000000000000000e+01 1.066784615384615336e+03 4.413555297851562500e+02 -3.058959960937500000e+00 9.999999776482582092e-03 0.000000000000000000e+00 1.667998168945312500e+03 1.783286452293395996e+00 4.000000000000000000e+00 3.935045471191406250e+02 -6.925000000000000000e+01 5.075000000000000000e+01
6.100000000000000000e+01 1.134484615384615836e+03 5.024552612304687500e+02 -2.883422851562500000e+00 2.559279799461364746e-01 0.000000000000000000e+00 1.687249145507812500e+03 1.806795001029968262e+00 4.000000000000000000e+00 6.021996459960937500e+02 -6.825000000000000000e+01 5.075000000000000000e+01
7.200000000000000000e+01 1.157392307692307668e+03 5.298809204101562500e+02 -2.795654296875000000e+00 9.999999776482582092e-03 0.000000000000000000e+00 1.696874633789062500e+03 1.783457636833190918e+00 4.000000000000000000e+00 4.108850708007812500e+02 -6.775000000000000000e+01 5.075000000000000000e+01
6.000000000000000000e+01 1.167846153846153811e+03 5.395912475585937500e+02 -2.659210205078125000e+00 1.064877659082412720e-01 0.000000000000000000e+00 1.709933715820312500e+03 7.146017551422119141e-01 4.000000000000000000e+00 4.974002685546875000e+02 -6.725000000000000000e+01 5.075000000000000000e+01
6.700000000000000000e+01 1.155615384615384983e+03 5.425155029296875000e+02 -2.474090576171875000e+00 9.999999776482582092e-03 5.882352963089942932e-02 1.726426269531250000e+03 7.055495977401733398e-01 4.000000000000000000e+00 4.692334594726562500e+02 -6.675000000000000000e+01 5.075000000000000000e+01
5.900000000000000000e+01 1.083492307692307577e+03 5.519086303710937500e+02 -2.103851318359375000e+00 2.166021019220352173e-01 8.823529481887817383e-01 1.759411621093750000e+03 1.614000916481018066e+00 4.000000000000000000e+00 6.121040039062500000e+02 -6.575000000000000000e+01 5.075000000000000000e+01
7.100000000000000000e+01 1.069492307692307577e+03 5.580230102539062500e+02 -1.895080566406250000e+00 9.999999776482582092e-03 0.000000000000000000e+00 1.772738403320312500e+03 1.174257516860961914e+00 4.000000000000000000e+00 2.961255798339843750e+02 -6.525000000000000000e+01 5.075000000000000000e+01
5.900000000000000000e+01 1.049630769230768465e+03 5.629119873046875000e+02 -1.678405761718750000e+00 9.999999776482582092e-03 0.000000000000000000e+00 1.785009887695312500e+03 1.254797458648681641e+00 4.000000000000000000e+00 5.104496459960937500e+02 -6.475000000000000000e+01 5.075000000000000000e+01
6.600000000000000000e+01 1.036515384615385074e+03 5.641030273437500000e+02 -1.461730957031250000e+00 9.999999776482582092e-03 2.352941185235977173e-01 1.797281372070312500e+03 7.183454036712646484e-01 4.000000000000000000e+00 3.090615844726562500e+02 -6.425000000000000000e+01 5.075000000000000000e+01
6.400000000000000000e+01 1.032099999999999454e+03 5.556826782226562500e+02 -1.245056152343750000e+00 9.999999776482582092e-03 0.000000000000000000e+00 1.809552978515625000e+03 1.174969792366027832e+00 4.000000000000000000e+00 3.820905151367187500e+02 -6.375000000000000000e+01 5.075000000000000000e+01
5.600000000000000000e+01 1.000153846153846189e+03 5.430169677734375000e+02 -1.042236328125000000e+00 9.999999776482582092e-03 2.941176593303680420e-01 1.815019287109375000e+03 1.626750707626342773e+00 4.000000000000000000e+00 3.131188659667968750e+02 -6.325000000000000000e+01 5.075000000000000000e+01
7.100000000000000000e+01 9.884000000000000909e+02 5.286614990234375000e+02 -6.365966796875000000e-01 9.999999776482582092e-03 2.941176593303680420e-01 1.825952148437500000e+03 1.727959990501403809e+00 4.000000000000000000e+00 2.802671203613281250e+02 -6.225000000000000000e+01 5.075000000000000000e+01
4.700000000000000000e+01 1.007969230769230990e+03 5.289846801757812500e+02 -4.030456542968750000e-01 0.000000000000000000e+00 0.000000000000000000e+00 1.819437377929687500e+03 1.733436822891235352e+00 4.000000000000000000e+00 2.058789367675781250e+02 -6.175000000000000000e+01 5.075000000000000000e+01
6.100000000000000000e+01 1.001300000000000409e+03 5.257714233398437500e+02 -7.727050781250000000e-02 0.000000000000000000e+00 1.176470592617988586e-01 1.776979248046875000e+03 1.731526017189025879e+00 4.000000000000000000e+00 2.019813385009765625e+02 -6.125000000000000000e+01 5.075000000000000000e+01
6.300000000000000000e+01 1.067753846153846553e+03 4.696515197753906250e+02 5.742797851562500000e-01 0.000000000000000000e+00 0.000000000000000000e+00 1.692062866210937500e+03 1.080564618110656738e+00 4.000000000000000000e+00 1.912445068359375000e+02 -6.025000000000000000e+01 5.075000000000000000e+01
1.200000000000000000e+01 1.154015384615384619e+03 5.485334472656250000e+02 1.072296142578125000e+00 0.000000000000000000e+00 0.000000000000000000e+00 1.536772705078125000e+03 8.030360937118530273e-01 1.000000000000000000e+00 4.502707824707031250e+02 -5.675000000000000000e+01 5.075000000000000000e+01
1.800000000000000000e+01 1.086192307692306940e+03 5.643272094726562500e+02 1.139495849609375000e+00 0.000000000000000000e+00 0.000000000000000000e+00 1.517276489257812500e+03 1.605527758598327637e+00 1.000000000000000000e+00 2.522004699707031250e+02 -5.625000000000000000e+01 5.075000000000000000e+01
2.800000000000000000e+01 5.294615384615386802e+02 1.882116088867187500e+02 1.886901855468750000e-01 0.000000000000000000e+00 6.470588445663452148e-01 2.598793945312500000e+03 3.415014266967773438e+00 3.000000000000000000e+00 2.606536865234375000e+02 -9.925000000000000000e+01 5.125000000000000000e+01
1.600000000000000000e+01 5.726692307692306940e+02 2.162970275878906250e+02 8.972167968750000000e-03 0.000000000000000000e+00 2.352941185235977173e-01 2.586052001953125000e+03 3.348744392395019531e+00 1.000000000000000000e+00 2.502437438964843750e+02 -9.775000000000000000e+01 5.125000000000000000e+01
2.800000000000000000e+01 6.260076923076923094e+02 2.184717712402343750e+02 -1.170043945312500000e-01 0.000000000000000000e+00 6.470588445663452148e-01 2.565697021484375000e+03 3.336313962936401367e+00 3.000000000000000000e+00 2.389074859619140625e+02 -9.725000000000000000e+01 5.125000000000000000e+01
4.300000000000000000e+01 6.351461538461537657e+02 2.475987091064453125e+02 -6.930847167968750000e-01 0.000000000000000000e+00 0.000000000000000000e+00 2.456310302734375000e+03 8.714583516120910645e-01 3.000000000000000000e+00 2.854094543457031250e+02 -9.575000000000000000e+01 5.125000000000000000e+01
5.600000000000000000e+01 6.547769230769227988e+02 2.539201507568359375e+02 -8.757019042968750000e-01 0.000000000000000000e+00 2.941176593303680420e-01 2.420117919921875000e+03 8.696691989898681641e-01 4.000000000000000000e+00 3.276743774414062500e+02 -9.525000000000000000e+01 5.125000000000000000e+01
4.900000000000000000e+01 6.706076923076923322e+02 2.477467651367187500e+02 -1.055206298828125000e+00 0.000000000000000000e+00 0.000000000000000000e+00 2.384015869140625000e+03 8.737932443618774414e-01 4.000000000000000000e+00 3.514350891113281250e+02 -9.475000000000000000e+01 5.125000000000000000e+01
6.700000000000000000e+01 6.913384615384618428e+02 2.408292083740234375e+02 -1.234680175781250000e+00 0.000000000000000000e+00 5.882352963089942932e-02 2.347913574218750000e+03 1.091278314590454102e+00 4.000000000000000000e+00 3.856307373046875000e+02 -9.425000000000000000e+01 5.125000000000000000e+01
4.600000000000000000e+01 7.152692307692307168e+02 2.355410461425781250e+02 -1.414184570312500000e+00 0.000000000000000000e+00 5.294117927551269531e-01 2.311811279296875000e+03 8.820083737373352051e-01 4.000000000000000000e+00 3.799738159179687500e+02 -9.375000000000000000e+01 5.125000000000000000e+01
7.000000000000000000e+01 7.790769230769229807e+02 2.651664123535156250e+02 -1.584594726562500000e+00 9.999999776482582092e-03 0.000000000000000000e+00 2.257689941406250000e+03 2.022817611694335938e+00 4.000000000000000000e+00 4.094635009765625000e+02 -9.275000000000000000e+01 5.125000000000000000e+01
5.200000000000000000e+01 8.228153846153846871e+02 3.139393615722656250e+02 -1.777130126953125000e+00 9.999999776482582092e-03 5.882353186607360840e-01 2.188763671875000000e+03 2.082397222518920898e+00 4.000000000000000000e+00 3.911296081542968750e+02 -9.125000000000000000e+01 5.125000000000000000e+01
6.500000000000000000e+01 8.333307692307694197e+02 2.849378967285156250e+02 -1.846557617187500000e+00 9.999999776482582092e-03 0.000000000000000000e+00 2.154251953125000000e+03 2.027669191360473633e+00 4.000000000000000000e+00 3.896529235839843750e+02 -9.025000000000000000e+01 5.125000000000000000e+01
3.900000000000000000e+01 8.316461538461537657e+02 2.800770874023437500e+02 -1.894348144531250000e+00 9.999999776482582092e-03 5.882353186607360840e-01 2.138008056640625000e+03 1.964935302734375000e+00 3.000000000000000000e+00 3.691405029296875000e+02 -8.975000000000000000e+01 5.125000000000000000e+01
6.100000000000000000e+01 8.017846153846153356e+02 2.814400329589843750e+02 -1.955261230468750000e+00 9.999999776482582092e-03 2.941176593303680420e-01 2.122776123046875000e+03 1.281076788902282715e+00 4.000000000000000000e+00 3.497615051269531250e+02 -8.925000000000000000e+01 5.125000000000000000e+01
5.700000000000000000e+01 7.713538461538457796e+02 2.853889465332031250e+02 -2.016143798828125000e+00 9.999999776482582092e-03 2.941176593303680420e-01 2.107544189453125000e+03 1.006112575531005859e+00 4.000000000000000000e+00 3.575291137695312500e+02 -8.875000000000000000e+01 5.125000000000000000e+01
5.800000000000000000e+01 7.245692307692308987e+02 3.036461791992187500e+02 -2.155578613281250000e+00 9.999999776482582092e-03 0.000000000000000000e+00 2.080400390625000000e+03 7.923359870910644531e-01 4.000000000000000000e+00 2.777590332031250000e+02 -8.775000000000000000e+01 5.125000000000000000e+01
5.600000000000000000e+01 7.073000000000004093e+02 3.295965576171875000e+02 -2.324523925781250000e+00 9.999999776482582092e-03 0.000000000000000000e+00 2.058789550781250000e+03 7.980268001556396484e-01 4.000000000000000000e+00 2.375170288085937500e+02 -8.675000000000000000e+01 5.125000000000000000e+01
6.100000000000000000e+01 6.884923076923076906e+02 3.407269287109375000e+02 -2.408996582031250000e+00 9.999999776482582092e-03 2.941176593303680420e-01 2.047984252929687500e+03 1.659580230712890625e+00 4.000000000000000000e+00 1.941662139892578125e+02 -8.625000000000000000e+01 5.125000000000000000e+01
3.600000000000000000e+01 6.763076923076924913e+02 3.523936767578125000e+02 -2.430664062500000000e+00 9.999999776482582092e-03 0.000000000000000000e+00 2.048576416015625000e+03 1.977526903152465820e+00 3.000000000000000000e+00 1.719999694824218750e+02 -8.575000000000000000e+01 5.125000000000000000e+01
5.900000000000000000e+01 6.729384615384616382e+02 3.698158569335937500e+02 -2.452301025390625000e+00 9.999999776482582092e-03 0.000000000000000000e+00 2.049168701171875000e+03 1.971969723701477051e+00 4.000000000000000000e+00 1.679907226562500000e+02 -8.525000000000000000e+01 5.125000000000000000e+01
6.000000000000000000e+00 6.695923076923074859e+02 3.849426269531250000e+02 -2.473968505859375000e+00 9.999999776482582092e-03 0.000000000000000000e+00 2.049760742187500000e+03 1.960880637168884277e+00 1.000000000000000000e+00 1.385775451660156250e+02 -8.475000000000000000e+01 5.125000000000000000e+01
7.000000000000000000e+00 6.581692307692306940e+02 3.965635375976562500e+02 -2.464294433593750000e+00 9.999999776482582092e-03 0.000000000000000000e+00 2.052369628906250000e+03 1.953123450279235840e+00 1.000000000000000000e+00 9.158667755126953125e+01 -8.425000000000000000e+01 5.125000000000000000e+01
2.000000000000000000e+01 6.539923076923075769e+02 3.975270690917968750e+02 -2.360717773437500000e+00 9.999999776482582092e-03 5.882353186607360840e-01 2.061028076171875000e+03 1.943559527397155762e+00 3.000000000000000000e+00 9.502926635742187500e+01 -8.375000000000000000e+01 5.125000000000000000e+01
5.200000000000000000e+01 6.581769230769230035e+02 3.894067382812500000e+02 -2.257110595703125000e+00 9.999999776482582092e-03 2.941176593303680420e-01 2.069686767578125000e+03 1.939094662666320801e+00 4.000000000000000000e+00 8.865423583984375000e+01 -8.325000000000000000e+01 5.125000000000000000e+01
1.900000000000000000e+01 6.566846153846151992e+02 3.758872375488281250e+02 -2.153503417968750000e+00 9.999999776482582092e-03 0.000000000000000000e+00 2.078345214843750000e+03 1.941144108772277832e+00 1.000000000000000000e+00 1.016746139526367188e+02 -8.275000000000000000e+01 5.125000000000000000e+01
1.500000000000000000e+01 6.533692307692307395e+02 3.626157836914062500e+02 -2.184265136718750000e+00 9.999999776482582092e-03 0.000000000000000000e+00 2.035725097656250000e+03 1.936546683311462402e+00 1.000000000000000000e+00 1.131838378906250000e+02 -8.225000000000000000e+01 5.125000000000000000e+01
3.200000000000000000e+01 6.584615384615384528e+02 3.438571472167968750e+02 -2.514556884765625000e+00 9.999999776482582092e-03 0.000000000000000000e+00 1.847926757812500000e+03 1.900652170181274414e+00 3.000000000000000000e+00 4.066680526733398438e+01 -8.125000000000000000e+01 5.125000000000000000e+01
6.200000000000000000e+01 6.566307692307692605e+02 3.388959045410156250e+02 -2.679718017578125000e+00 9.999999776482582092e-03 5.882352963089942932e-02 1.754027587890625000e+03 1.888148903846740723e+00 4.000000000000000000e+00 1.516192245483398438e+01 -8.075000000000000000e+01 5.125000000000000000e+01
1.200000000000000000e+01 6.830000000000000000e+02 3.519011535644531250e+02 -2.214935302734375000e+00 9.999999776482582092e-03 0.000000000000000000e+00 1.955298706054687500e+03 1.185332059860229492e+00 1.000000000000000000e+00 1.731661796569824219e+01 -7.925000000000000000e+01 5.125000000000000000e+01
3.500000000000000000e+01 6.931076923076921048e+02 3.683640747070312500e+02 -2.030914306640625000e+00 9.999999776482582092e-03 0.000000000000000000e+00 2.037024536132812500e+03 7.705648541450500488e-01 3.000000000000000000e+00 3.332099914550781250e+01 -7.875000000000000000e+01 5.125000000000000000e+01
4.900000000000000000e+01 7.248769230769229353e+02 3.877942199707031250e+02 -2.232513427734375000e+00 9.999999776482582092e-03 5.294117927551269531e-01 1.997180664062500000e+03 7.643096446990966797e-01 4.000000000000000000e+00 1.004303207397460938e+02 -7.825000000000000000e+01 5.125000000000000000e+01
2.000000000000000000e+01 7.513000000000002956e+02 4.091109313964843750e+02 -2.434112548828125000e+00 1.099888533353805542e-01 6.470588445663452148e-01 1.957336914062500000e+03 7.577934861183166504e-01 3.000000000000000000e+00 2.157283630371093750e+02 -7.775000000000000000e+01 5.125000000000000000e+01
2.100000000000000000e+01 7.662692307692310578e+02 4.265771484375000000e+02 -2.635711669921875000e+00 1.039507314562797546e-01 2.941176593303680420e-01 1.917493041992187500e+03 7.547930479049682617e-01 3.000000000000000000e+00 2.370303497314453125e+02 -7.725000000000000000e+01 5.125000000000000000e+01
4.100000000000000000e+01 7.816538461538461888e+02 4.406922912597656250e+02 -2.837158203125000000e+00 1.126414835453033447e-01 2.941176593303680420e-01 1.878429077148437500e+03 7.536458969116210938e-01 3.000000000000000000e+00 2.621594238281250000e+02 -7.675000000000000000e+01 5.125000000000000000e+01
5.500000000000000000e+01 8.121615384615383846e+02 4.785391845703125000e+02 -3.239166259765625000e+00 1.358046531677246094e-01 0.000000000000000000e+00 1.804980102539062500e+03 1.057611823081970215e+00 4.000000000000000000e+00 3.696444091796875000e+02 -7.575000000000000000e+01 5.125000000000000000e+01
5.500000000000000000e+01 8.265538461538460524e+02 4.966147766113281250e+02 -3.440185546875000000e+00 1.238401085138320923e-01 7.058823704719543457e-01 1.768255493164062500e+03 1.747719883918762207e+00 4.000000000000000000e+00 3.234350585937500000e+02 -7.525000000000000000e+01 5.125000000000000000e+01
3.900000000000000000e+01 8.395153846153843915e+02 5.024342041015625000e+02 -3.587951660156250000e+00 1.307751834392547607e-01 8.235294222831726074e-01 1.736733642578125000e+03 1.065185189247131348e+00 3.000000000000000000e+00 3.379307861328125000e+02 -7.475000000000000000e+01 5.125000000000000000e+01
3.200000000000000000e+01 8.503153846153848008e+02 4.990506286621093750e+02 -3.682495117187500000e+00 1.279345005750656128e-01 8.235294222831726074e-01 1.710414306640625000e+03 1.305231928825378418e+00 3.000000000000000000e+00 3.731191711425781250e+02 -7.425000000000000000e+01 5.125000000000000000e+01
6.300000000000000000e+01 9.345769230769232081e+02 4.033052673339843750e+02 -3.780456542968750000e+00 2.423627823591232300e-01 2.941176593303680420e-01 1.614542480468750000e+03 7.064871191978454590e-01 4.000000000000000000e+00 5.905162353515625000e+02 -7.175000000000000000e+01 5.125000000000000000e+01
5.600000000000000000e+01 9.701846153846151992e+02 3.995542297363281250e+02 -3.683776855468750000e+00 1.903680115938186646e-01 6.470588445663452148e-01 1.597634033203125000e+03 1.579280257225036621e+00 4.000000000000000000e+00 5.521074218750000000e+02 -7.075000000000000000e+01 5.125000000000000000e+01
2.600000000000000000e+01 1.021161538461538157e+03 4.249665832519531250e+02 -3.573852539062500000e+00 1.572481244802474976e-01 0.000000000000000000e+00 1.590474365234375000e+03 1.494502544403076172e+00 3.000000000000000000e+00 4.880938720703125000e+02 -6.975000000000000000e+01 5.125000000000000000e+01
5.700000000000000000e+01 1.027653846153846189e+03 4.287598571777343750e+02 -3.522369384765625000e+00 1.480740904808044434e-01 0.000000000000000000e+00 1.588810791015625000e+03 1.762648105621337891e+00 4.000000000000000000e+00 4.583989257812500000e+02 -6.925000000000000000e+01 5.125000000000000000e+01
5.700000000000000000e+01 1.049523076923076587e+03 4.426482849121093750e+02 -3.481414794921875000e+00 1.789456605911254883e-01 5.882353186607360840e-01 1.592896240234375000e+03 1.778933286666870117e+00 4.000000000000000000e+00 5.382864990234375000e+02 -6.875000000000000000e+01 5.125000000000000000e+01
5.100000000000000000e+01 1.156546153846153857e+03 5.275209350585937500e+02 -3.325408935546875000e+00 2.735347449779510498e-01 0.000000000000000000e+00 1.608587646484375000e+03 1.668396115303039551e+00 4.000000000000000000e+00 6.462064819335937500e+02 -6.725000000000000000e+01 5.125000000000000000e+01
5.700000000000000000e+01 1.067200000000000273e+03 5.321795043945312500e+02 -3.218261718750000000e+00 2.507760226726531982e-01 2.352941185235977173e-01 1.619543090820312500e+03 1.667085170745849609e+00 4.000000000000000000e+00 6.833673095703125000e+02 -6.675000000000000000e+01 5.125000000000000000e+01
4.200000000000000000e+01 1.006192307692307395e+03 5.411159667968750000e+02 -3.111114501953125000e+00 1.699143052101135254e-01 0.000000000000000000e+00 1.630498657226562500e+03 1.664456129074096680e+00 3.000000000000000000e+00 4.299242553710937500e+02 -6.625000000000000000e+01 5.125000000000000000e+01
4.300000000000000000e+01 9.528076923076921503e+02 5.455806274414062500e+02 -3.003967285156250000e+00 2.621402144432067871e-01 0.000000000000000000e+00 1.641454101562500000e+03 1.655626177787780762e+00 3.000000000000000000e+00 6.357659912109375000e+02 -6.575000000000000000e+01 5.125000000000000000e+01
5.200000000000000000e+01 9.399461538461539476e+02 5.468282470703125000e+02 -2.852661132812500000e+00 1.599492281675338745e-01 3.529411852359771729e-01 1.652648681640625000e+03 1.636385321617126465e+00 4.000000000000000000e+00 5.574034423828125000e+02 -6.525000000000000000e+01 5.125000000000000000e+01
7.100000000000000000e+01 1.017807692307692150e+03 5.421979370117187500e+02 -2.686614990234375000e+00 2.224744558334350586e-01 0.000000000000000000e+00 1.663922973632812500e+03 1.582230806350708008e+00 4.000000000000000000e+00 4.386161193847656250e+02 -6.475000000000000000e+01 5.125000000000000000e+01
1.600000000000000000e+01 1.057361538461538430e+03 5.327091064453125000e+02 -2.520599365234375000e+00 4.069528579711914062e-01 0.000000000000000000e+00 1.675197143554687500e+03 1.554437756538391113e+00 1.000000000000000000e+00 8.348688354492187500e+02 -6.425000000000000000e+01 5.125000000000000000e+01
4.600000000000000000e+01 1.035476923076922958e+03 5.199673461914062500e+02 -2.354583740234375000e+00 2.093195617198944092e-01 2.941176593303680420e-01 1.686471435546875000e+03 1.570714235305786133e+00 4.000000000000000000e+00 5.651628417968750000e+02 -6.375000000000000000e+01 5.125000000000000000e+01
7.400000000000000000e+01 1.066176923076922776e+03 4.996466064453125000e+02 -1.725036621093750000e+00 1.824311912059783936e-01 0.000000000000000000e+00 1.712161499023437500e+03 1.236149430274963379e+00 4.000000000000000000e+00 4.649745178222656250e+02 -6.225000000000000000e+01 5.125000000000000000e+01
7.200000000000000000e+01 1.022392307692308009e+03 5.061279907226562500e+02 -1.482330322265625000e+00 9.999999776482582092e-03 0.000000000000000000e+00 1.712529174804687500e+03 1.119848489761352539e+00 4.000000000000000000e+00 2.762698364257812500e+02 -6.175000000000000000e+01 5.125000000000000000e+01
6.300000000000000000e+01 1.087761538461538521e+03 4.929193725585937500e+02 -7.998352050781250000e-01 9.999999776482582092e-03 0.000000000000000000e+00 1.664089721679687500e+03 1.581003665924072266e+00 4.000000000000000000e+00 3.548988647460937500e+02 -6.075000000000000000e+01 5.125000000000000000e+01
4.200000000000000000e+01 1.104107692307692332e+03 4.672578125000000000e+02 -4.586181640625000000e-01 9.999999776482582092e-03 2.941176593303680420e-01 1.639869995117187500e+03 1.650993704795837402e+00 3.000000000000000000e+00 3.716044311523437500e+02 -6.025000000000000000e+01 5.125000000000000000e+01
5.000000000000000000e+01 1.078446153846153720e+03 4.545556335449218750e+02 -2.210388183593750000e-01 9.999999776482582092e-03 0.000000000000000000e+00 1.621588012695312500e+03 1.705383539199829102e+00 4.000000000000000000e+00 2.605172424316406250e+02 -5.975000000000000000e+01 5.125000000000000000e+01
5.400000000000000000e+01 1.082446153846153948e+03 4.700615844726562500e+02 -8.712768554687500000e-02 0.000000000000000000e+00 0.000000000000000000e+00 1.609243774414062500e+03 1.738311767578125000e+00 4.000000000000000000e+00 2.227319488525390625e+02 -5.925000000000000000e+01 5.125000000000000000e+01
5.100000000000000000e+01 1.110053846153846280e+03 5.357701416015625000e+02 7.412414550781250000e-01 0.000000000000000000e+00 0.000000000000000000e+00 1.528207275390625000e+03 1.485018134117126465e+00 4.000000000000000000e+00 4.306690979003906250e+01 -5.625000000000000000e+01 5.125000000000000000e+01
3.300000000000000000e+01 5.681461538461535383e+02 1.583875274658203125e+02 -2.365417480468750000e-01 0.000000000000000000e+00 0.000000000000000000e+00 2.542077880859375000e+03 2.142712116241455078e+00 3.000000000000000000e+00 2.267123107910156250e+02 -9.775000000000000000e+01 5.175000000000000000e+01
5.700000000000000000e+01 6.481076923076924459e+02 1.584712524414062500e+02 -8.197937011718750000e-01 0.000000000000000000e+00 0.000000000000000000e+00 2.439498535156250000e+03 1.348933815956115723e+00 4.000000000000000000e+00 2.523748016357421875e+02 -9.625000000000000000e+01 5.175000000000000000e+01
3.700000000000000000e+01 6.571692307692311488e+02 1.724028930664062500e+02 -1.040832519531250000e+00 0.000000000000000000e+00 0.000000000000000000e+00 2.398835937500000000e+03 8.566977977752685547e-01 3.000000000000000000e+00 2.947053222656250000e+02 -9.575000000000000000e+01 5.175000000000000000e+01
4.400000000000000000e+01 6.640538461538459387e+02 1.981836242675781250e+02 -1.226226806640625000e+00 0.000000000000000000e+00 0.000000000000000000e+00 2.362881347656250000e+03 8.548655509948730469e-01 3.000000000000000000e+00 3.178142395019531250e+02 -9.525000000000000000e+01 5.175000000000000000e+01
4.600000000000000000e+01 6.754692307692305349e+02 2.217744140625000000e+02 -1.399688720703125000e+00 0.000000000000000000e+00 5.294117927551269531e-01 2.328496337890625000e+03 8.926151990890502930e-01 4.000000000000000000e+00 3.568327331542968750e+02 -9.475000000000000000e+01 5.175000000000000000e+01
6.700000000000000000e+01 6.883846153846152447e+02 2.307762451171875000e+02 -1.573150634765625000e+00 0.000000000000000000e+00 0.000000000000000000e+00 2.294111083984375000e+03 8.563698530197143555e-01 4.000000000000000000e+00 3.766885681152343750e+02 -9.425000000000000000e+01 5.175000000000000000e+01
7.000000000000000000e+01 7.268230769230768828e+02 2.359168243408203125e+02 -1.844024658203125000e+00 9.999999776482582092e-03 2.352941185235977173e-01 2.231861816406250000e+03 8.540167808532714844e-01 4.000000000000000000e+00 3.710452270507812500e+02 -9.325000000000000000e+01 5.175000000000000000e+01
6.500000000000000000e+01 7.652461538461536747e+02 2.430503540039062500e+02 -1.941467285156250000e+00 9.999999776482582092e-03 0.000000000000000000e+00 2.203997802734375000e+03 1.270099163055419922e+00 4.000000000000000000e+00 3.767803039550781250e+02 -9.275000000000000000e+01 5.175000000000000000e+01
6.000000000000000000e+01 7.849615384615384528e+02 2.593625793457031250e+02 -2.038879394531250000e+00 9.999999776482582092e-03 0.000000000000000000e+00 2.176133789062500000e+03 2.036841869354248047e+00 4.000000000000000000e+00 4.260244445800781250e+02 -9.225000000000000000e+01 5.175000000000000000e+01
3.800000000000000000e+01 7.865230769230768146e+02 2.736322021484375000e+02 -2.129058837890625000e+00 9.999999776482582092e-03 0.000000000000000000e+00 2.150371093750000000e+03 2.054738521575927734e+00 3.000000000000000000e+00 4.024723510742187500e+02 -9.175000000000000000e+01 5.175000000000000000e+01
4.700000000000000000e+01 7.997923076923077588e+02 2.794877014160156250e+02 -2.197540283203125000e+00 9.999999776482582092e-03 1.176470592617988586e-01 2.130913085937500000e+03 2.050609588623046875e+00 4.000000000000000000e+00 4.109045410156250000e+02 -9.125000000000000000e+01 5.175000000000000000e+01
5.300000000000000000e+01 8.263153846153842323e+02 2.775797119140625000e+02 -2.414367675781250000e+00 9.999999776482582092e-03 0.000000000000000000e+00 2.073620361328125000e+03 1.951764822006225586e+00 4.000000000000000000e+00 3.343794555664062500e+02 -8.975000000000000000e+01 5.175000000000000000e+01
6.300000000000000000e+01 7.947000000000002728e+02 2.799619750976562500e+02 -2.505615234375000000e+00 9.999999776482582092e-03 2.941176593303680420e-01 2.056325195312500000e+03 1.930334210395812988e+00 4.000000000000000000e+00 3.554184265136718750e+02 -8.925000000000000000e+01 5.175000000000000000e+01
6.100000000000000000e+01 7.654230769230770193e+02 2.804002685546875000e+02 -2.596862792968750000e+00 1.122075244784355164e-01 1.764705926179885864e-01 2.039029785156250000e+03 1.929625868797302246e+00 4.000000000000000000e+00 3.413318786621093750e+02 -8.875000000000000000e+01 5.175000000000000000e+01
5.300000000000000000e+01 7.394615384615385665e+02 2.807745361328125000e+02 -2.688140869140625000e+00 9.999999776482582092e-03 0.000000000000000000e+00 2.021734497070312500e+03 1.403125286102294922e+00 4.000000000000000000e+00 3.175368957519531250e+02 -8.825000000000000000e+01 5.175000000000000000e+01
5.200000000000000000e+01 7.088999999999997499e+02 2.846239318847656250e+02 -2.842315673828125000e+00 1.030334755778312683e-01 0.000000000000000000e+00 1.998558105468750000e+03 1.936451792716979980e+00 4.000000000000000000e+00 2.684226989746093750e+02 -8.725000000000000000e+01 5.175000000000000000e+01
3.000000000000000000e+01 6.987461538461539021e+02 2.905015563964843750e+02 -2.917419433593750000e+00 9.999999776482582092e-03 5.882352963089942932e-02 1.987785278320312500e+03 1.769243359565734863e+00 3.000000000000000000e+00 2.208514251708984375e+02 -8.675000000000000000e+01 5.175000000000000000e+01
4.500000000000000000e+01 6.779153846153848235e+02 2.941304626464843750e+02 -2.992492675781250000e+00 9.999999776482582092e-03 2.352941185235977173e-01 1.977012329101562500e+03 1.949947953224182129e+00 4.000000000000000000e+00 1.739680328369140625e+02 -8.625000000000000000e+01 5.175000000000000000e+01
2.300000000000000000e+01 6.680461538461541977e+02 3.013848876953125000e+02 -2.968841552734375000e+00 9.999999776482582092e-03 0.000000000000000000e+00 1.979342163085937500e+03 1.948522806167602539e+00 3.000000000000000000e+00 1.646343383789062500e+02 -8.575000000000000000e+01 5.175000000000000000e+01
4.500000000000000000e+01 6.548846153846153584e+02 3.160783691406250000e+02 -2.945190429687500000e+00 9.999999776482582092e-03 0.000000000000000000e+00 1.981672119140625000e+03 1.937449336051940918e+00 4.000000000000000000e+00 1.575185241699218750e+02 -8.525000000000000000e+01 5.175000000000000000e+01
2.600000000000000000e+01 6.481538461538461888e+02 3.396916198730468750e+02 -2.921569824218750000e+00 9.999999776482582092e-03 0.000000000000000000e+00 1.984001953125000000e+03 1.927267909049987793e+00 3.000000000000000000e+00 1.638378295898437500e+02 -8.475000000000000000e+01 5.175000000000000000e+01
3.700000000000000000e+01 6.403692307692308532e+02 3.623471984863281250e+02 -2.865783691406250000e+00 9.999999776482582092e-03 0.000000000000000000e+00 1.988518188476562500e+03 1.917324662208557129e+00 3.000000000000000000e+00 1.069773864746093750e+02 -8.425000000000000000e+01 5.175000000000000000e+01
3.600000000000000000e+01 6.279461538461538339e+02 3.626140747070312500e+02 -2.561401367187500000e+00 9.999999776482582092e-03 0.000000000000000000e+00 2.010668579101562500e+03 1.906418800354003906e+00 3.000000000000000000e+00 6.965806579589843750e+01 -8.325000000000000000e+01 5.175000000000000000e+01
1.200000000000000000e+01 6.275076923076921958e+02 3.544058532714843750e+02 -2.409210205078125000e+00 9.999999776482582092e-03 0.000000000000000000e+00 2.021743774414062500e+03 1.897459149360656738e+00 1.000000000000000000e+00 6.332442474365234375e+01 -8.275000000000000000e+01 5.175000000000000000e+01
1.600000000000000000e+01 6.176692307692309214e+02 3.480152893066406250e+02 -2.479064941406250000e+00 9.999999776482582092e-03 0.000000000000000000e+00 1.950198608398437500e+03 1.888184905052185059e+00 1.000000000000000000e+00 5.769877624511718750e+01 -8.225000000000000000e+01 5.175000000000000000e+01
1.700000000000000000e+01 6.162923076923078725e+02 3.397947082519531250e+02 -3.062866210937500000e+00 9.999999776482582092e-03 0.000000000000000000e+00 1.641867675781250000e+03 1.866352319717407227e+00 1.000000000000000000e+00 3.465790557861328125e+01 -8.125000000000000000e+01 5.175000000000000000e+01
1.600000000000000000e+01 7.184692307692306485e+02 3.671546630859375000e+02 -2.415588378906250000e+00 1.012064889073371887e-01 0.000000000000000000e+00 1.951704345703125000e+03 7.488520145416259766e-01 1.000000000000000000e+00 6.597674560546875000e+01 -7.825000000000000000e+01 5.175000000000000000e+01
2.700000000000000000e+01 7.294153846153844825e+02 3.825723876953125000e+02 -2.652862548828125000e+00 1.190177798271179199e-01 5.882353186607360840e-01 1.908853515625000000e+03 7.451215982437133789e-01 3.000000000000000000e+00 1.578467102050781250e+02 -7.775000000000000000e+01 5.175000000000000000e+01
1.300000000000000000e+01 7.470538461538463935e+02 3.991633911132812500e+02 -2.890136718750000000e+00 1.287701874971389771e-01 1.117647051811218262e+00 1.866002563476562500e+03 7.388435602188110352e-01 1.000000000000000000e+00 1.890024108886718750e+02 -7.725000000000000000e+01 5.175000000000000000e+01
3.900000000000000000e+01 7.868153846153849145e+02 4.101763610839843750e+02 -3.126312255859375000e+00 1.496048718690872192e-01 1.117647051811218262e+00 1.824170776367187500e+03 7.282211780548095703e-01 3.000000000000000000e+00 2.167120971679687500e+02 -7.675000000000000000e+01 5.175000000000000000e+01
2.100000000000000000e+01 8.018153846153844597e+02 4.264878845214843750e+02 -3.359161376953125000e+00 1.494865864515304565e-01 8.823529481887817383e-01 1.785396606445312500e+03 7.249160408973693848e-01 3.000000000000000000e+00 2.480408325195312500e+02 -7.625000000000000000e+01 5.175000000000000000e+01
2.500000000000000000e+01 7.938923076923080089e+02 4.564768676757812500e+02 -3.591979980468750000e+00 1.600692570209503174e-01 5.882353186607360840e-01 1.746622436523437500e+03 1.172315955162048340e+00 3.000000000000000000e+00 2.887433471679687500e+02 -7.575000000000000000e+01 5.175000000000000000e+01
1.700000000000000000e+01 8.116153846153848690e+02 4.760712585449218750e+02 -3.824829101562500000e+00 1.709001511335372925e-01 6.470588445663452148e-01 1.707848266601562500e+03 1.785909652709960938e+00 1.000000000000000000e+00 3.040672302246093750e+02 -7.525000000000000000e+01 5.175000000000000000e+01
3.300000000000000000e+01 8.319076923076924004e+02 4.792500000000000000e+02 -3.992218017578125000e+00 1.741609722375869751e-01 6.470588445663452148e-01 1.675147949218750000e+03 1.766375422477722168e+00 3.000000000000000000e+00 3.550698852539062500e+02 -7.475000000000000000e+01 5.175000000000000000e+01
2.000000000000000000e+01 8.778846153846151310e+02 4.544583740234375000e+02 -4.196044921875000000e+00 2.027455866336822510e-01 7.058823704719543457e-01 1.621895019531250000e+03 1.108539104461669922e+00 3.000000000000000000e+00 3.644943847656250000e+02 -7.375000000000000000e+01 5.175000000000000000e+01
2.800000000000000000e+01 8.781384615384615699e+02 4.276207885742187500e+02 -4.297973632812500000e+00 2.097456902265548706e-01 2.941176593303680420e-01 1.595268432617187500e+03 7.013915777206420898e-01 3.000000000000000000e+00 4.004848937988281250e+02 -7.325000000000000000e+01 5.175000000000000000e+01
4.200000000000000000e+01 8.718461538461541522e+02 4.129934082031250000e+02 -4.289978027343750000e+00 4.246814250946044922e-01 9.411764740943908691e-01 1.577469482421875000e+03 7.028717994689941406e-01 3.000000000000000000e+00 7.321055908203125000e+02 -7.275000000000000000e+01 5.175000000000000000e+01
3.700000000000000000e+01 8.955692307692307850e+02 4.098009643554687500e+02 -4.245330810546875000e+00 3.465285897254943848e-01 7.058823704719543457e-01 1.562612792968750000e+03 6.927921175956726074e-01 3.000000000000000000e+00 6.887566528320312500e+02 -7.225000000000000000e+01 5.175000000000000000e+01
2.300000000000000000e+01 9.206846153846150855e+02 4.029869689941406250e+02 -4.156066894531250000e+00 2.767788171768188477e-01 5.882353186607360840e-01 1.532899658203125000e+03 1.176972508430480957e+00 3.000000000000000000e+00 5.872561645507812500e+02 -7.125000000000000000e+01 5.175000000000000000e+01
2.300000000000000000e+01 9.583230769230772239e+02 4.095215148925781250e+02 -4.110290527343750000e+00 3.187821209430694580e-01 6.470588445663452148e-01 1.526789672851562500e+03 1.397296190261840820e+00 3.000000000000000000e+00 6.657482299804687500e+02 -7.075000000000000000e+01 5.175000000000000000e+01
3.800000000000000000e+01 9.647769230769231399e+02 4.187834777832031250e+02 -4.064483642578125000e+00 2.708097100257873535e-01 2.941176593303680420e-01 1.520679687500000000e+03 1.472786426544189453e+00 3.000000000000000000e+00 5.459584960937500000e+02 -7.025000000000000000e+01 5.175000000000000000e+01
4.000000000000000000e+01 9.901615384615391804e+02 4.235581665039062500e+02 -4.018676757812500000e+00 2.183318585157394409e-01 2.941176593303680420e-01 1.514569702148437500e+03 1.146573781967163086e+00 3.000000000000000000e+00 5.573703613281250000e+02 -6.975000000000000000e+01 5.175000000000000000e+01
6.600000000000000000e+01 1.090684615384615199e+03 4.618108520507812500e+02 -3.997467041015625000e+00 2.732339799404144287e-01 5.882353186607360840e-01 1.506714355468750000e+03 1.480509877204895020e+00 4.000000000000000000e+00 5.400775756835937500e+02 -6.825000000000000000e+01 5.175000000000000000e+01
5.500000000000000000e+01 1.112500000000000455e+03 4.859584655761718750e+02 -4.003295898437500000e+00 3.411627113819122314e-01 0.000000000000000000e+00 1.505259765625000000e+03 8.133096694946289062e-01 4.000000000000000000e+00 8.259348754882812500e+02 -6.775000000000000000e+01 5.175000000000000000e+01
6.400000000000000000e+01 1.074738461538461706e+03 4.961128845214843750e+02 -3.991607666015625000e+00 5.152075886726379395e-01 0.000000000000000000e+00 1.507241577148437500e+03 1.133127808570861816e+00 4.000000000000000000e+00 8.089524536132812500e+02 -6.725000000000000000e+01 5.175000000000000000e+01
5.000000000000000000e+01 9.602153846153850054e+02 4.992331542968750000e+02 -3.962432861328125000e+00 2.340245246887207031e-01 0.000000000000000000e+00 1.512660034179687500e+03 1.414535045623779297e+00 4.000000000000000000e+00 6.348272094726562500e+02 -6.675000000000000000e+01 5.175000000000000000e+01
4.600000000000000000e+01 8.733461538461542659e+02 5.062237548828125000e+02 -3.933258056640625000e+00 2.454797327518463135e-01 0.000000000000000000e+00 1.518078369140625000e+03 1.151910781860351562e+00 4.000000000000000000e+00 6.174445800781250000e+02 -6.625000000000000000e+01 5.175000000000000000e+01
5.000000000000000000e+01 7.919076923076924004e+02 5.076701354980468750e+02 -3.904052734375000000e+00 3.030402958393096924e-01 0.000000000000000000e+00 1.523496704101562500e+03 1.658243060111999512e+00 4.000000000000000000e+00 6.946812744140625000e+02 -6.575000000000000000e+01 5.175000000000000000e+01
2.300000000000000000e+01 8.330923076923079407e+02 5.000891113281250000e+02 -3.810241699218750000e+00 3.155253529548645020e-01 6.470588445663452148e-01 1.532558959960937500e+03 1.628576517105102539e+00 3.000000000000000000e+00 6.610869140625000000e+02 -6.525000000000000000e+01 5.175000000000000000e+01
5.200000000000000000e+01 9.535615384615388166e+02 4.842623291015625000e+02 -3.694854736328125000e+00 3.893578648567199707e-01 0.000000000000000000e+00 1.542835937500000000e+03 1.566599130630493164e+00 4.000000000000000000e+00 7.067975463867187500e+02 -6.475000000000000000e+01 5.175000000000000000e+01
4.900000000000000000e+01 9.762846153846154493e+02 4.674471740722656250e+02 -3.579467773437500000e+00 3.731388747692108154e-01 5.882353186607360840e-01 1.553112915039062500e+03 1.554082036018371582e+00 4.000000000000000000e+00 7.424209594726562500e+02 -6.425000000000000000e+01 5.175000000000000000e+01
5.100000000000000000e+01 9.951692307692308077e+02 4.473559265136718750e+02 -3.247222900390625000e+00 2.726007103919982910e-01 0.000000000000000000e+00 1.575050170898437500e+03 1.576299190521240234e+00 4.000000000000000000e+00 6.065104980468750000e+02 -6.325000000000000000e+01 5.175000000000000000e+01
2.300000000000000000e+01 9.934769230769228443e+02 4.440148315429687500e+02 -3.030334472656250000e+00 2.055884301662445068e-01 0.000000000000000000e+00 1.586710571289062500e+03 1.587542295455932617e+00 3.000000000000000000e+00 5.578904418945312500e+02 -6.275000000000000000e+01 5.175000000000000000e+01
6.200000000000000000e+01 1.040815384615384119e+03 4.462725219726562500e+02 -2.813446044921875000e+00 1.802226006984710693e-01 0.000000000000000000e+00 1.598370849609375000e+03 1.603137731552124023e+00 4.000000000000000000e+00 4.587349853515625000e+02 -6.225000000000000000e+01 5.175000000000000000e+01
6.000000000000000000e+01 1.091361538461538430e+03 4.771199340820312500e+02 -1.848205566406250000e+00 1.323461979627609253e-01 0.000000000000000000e+00 1.593658325195312500e+03 1.617668032646179199e+00 4.000000000000000000e+00 4.619710388183593750e+02 -6.075000000000000000e+01 5.175000000000000000e+01
1.200000000000000000e+01 1.085969230769231444e+03 4.726251831054687500e+02 -1.491485595703125000e+00 9.999999776482582092e-03 5.882353186607360840e-01 1.587677124023437500e+03 1.647513508796691895e+00 1.000000000000000000e+00 3.662077026367187500e+02 -6.025000000000000000e+01 5.175000000000000000e+01
5.300000000000000000e+01 1.075253846153846325e+03 5.047204284667968750e+02 -9.715576171875000000e-01 9.999999776482582092e-03 0.000000000000000000e+00 1.579832519531250000e+03 1.703101754188537598e+00 4.000000000000000000e+00 3.769444580078125000e+02 -5.925000000000000000e+01 5.175000000000000000e+01
5.000000000000000000e+01 1.084092307692307941e+03 5.393085327148437500e+02 -7.438659667968750000e-01 9.999999776482582092e-03 1.176470592617988586e-01 1.576596557617187500e+03 1.682635307312011719e+00 4.000000000000000000e+00 2.613114929199218750e+02 -5.875000000000000000e+01 5.175000000000000000e+01
7.000000000000000000e+01 1.118753846153846553e+03 5.544877319335937500e+02 -5.161437988281250000e-01 0.000000000000000000e+00 0.000000000000000000e+00 1.573360595703125000e+03 1.638965725898742676e+00 4.000000000000000000e+00 2.338056640625000000e+02 -5.825000000000000000e+01 5.175000000000000000e+01
5.700000000000000000e+01 1.162984615384615836e+03 5.581643066406250000e+02 -2.987670898437500000e-01 9.999999776482582092e-03 0.000000000000000000e+00 1.565868896484375000e+03 1.449099779129028320e+00 4.000000000000000000e+00 3.452944641113281250e+02 -5.775000000000000000e+01 5.175000000000000000e+01
3.900000000000000000e+01 4.990846153846153470e+02 1.206661987304687500e+02 -2.948303222656250000e-01 0.000000000000000000e+00 0.000000000000000000e+00 2.496429931640625000e+03 1.078829526901245117e+00 3.000000000000000000e+00 2.791193847656250000e+02 -9.925000000000000000e+01 5.225000000000000000e+01
4.200000000000000000e+01 4.903923076923074973e+02 1.195291900634765625e+02 -3.572387695312500000e-01 0.000000000000000000e+00 0.000000000000000000e+00 2.496987792968750000e+03 8.693931698799133301e-01 3.000000000000000000e+00 2.435746307373046875e+02 -9.875000000000000000e+01 5.225000000000000000e+01
3.700000000000000000e+01 6.434230769230773603e+02 1.042174148559570312e+02 -1.138519287109375000e+00 0.000000000000000000e+00 5.882352963089942932e-02 2.386224609375000000e+03 8.515228629112243652e-01 3.000000000000000000e+00 2.693585815429687500e+02 -9.625000000000000000e+01 5.225000000000000000e+01
3.100000000000000000e+01 6.444384615384616382e+02 1.223483123779296875e+02 -1.388610839843750000e+00 0.000000000000000000e+00 2.352941185235977173e-01 2.341361572265625000e+03 8.543316125869750977e-01 3.000000000000000000e+00 3.071921386718750000e+02 -9.575000000000000000e+01 5.225000000000000000e+01
2.600000000000000000e+01 6.496692307692303530e+02 1.619704132080078125e+02 -1.576721191406250000e+00 9.999999776482582092e-03 4.117647111415863037e-01 2.305644775390625000e+03 2.042025566101074219e+00 3.000000000000000000e+00 3.244425659179687500e+02 -9.525000000000000000e+01 5.225000000000000000e+01
4.600000000000000000e+01 6.734923076923073495e+02 2.296433868408203125e+02 -1.911590576171875000e+00 9.999999776482582092e-03 4.705882370471954346e-01 2.240308593750000000e+03 8.594893813133239746e-01 4.000000000000000000e+00 3.464235229492187500e+02 -9.425000000000000000e+01 5.225000000000000000e+01
2.900000000000000000e+01 7.246538461538464162e+02 2.400557861328125000e+02 -2.188690185546875000e+00 9.999999776482582092e-03 0.000000000000000000e+00 2.178973144531250000e+03 1.374262332916259766e+00 3.000000000000000000e+00 3.738237304687500000e+02 -9.325000000000000000e+01 5.225000000000000000e+01
6.000000000000000000e+01 7.515846153846152902e+02 2.513798217773437500e+02 -2.407958984375000000e+00 9.999999776482582092e-03 5.882352963089942932e-02 2.121638427734375000e+03 1.211502313613891602e+00 4.000000000000000000e+00 3.921123962402343750e+02 -9.225000000000000000e+01 5.225000000000000000e+01
5.500000000000000000e+01 7.732307692307693969e+02 2.643965454101562500e+02 -2.515747070312500000e+00 1.086587756872177124e-01 8.823529481887817383e-01 2.094722900390625000e+03 1.244888782501220703e+00 4.000000000000000000e+00 4.108261413574218750e+02 -9.175000000000000000e+01 5.225000000000000000e+01
6.200000000000000000e+01 7.873615384615386574e+02 2.702615356445312500e+02 -2.617980957031250000e+00 1.127694249153137207e-01 0.000000000000000000e+00 2.073062744140625000e+03 1.969556212425231934e+00 4.000000000000000000e+00 3.906453247070312500e+02 -9.125000000000000000e+01 5.225000000000000000e+01
3.600000000000000000e+01 7.957692307692306031e+02 2.744040527343750000e+02 -2.822448730468750000e+00 9.999999776482582092e-03 5.882353186607360840e-01 2.029742187500000000e+03 1.974117875099182129e+00 3.000000000000000000e+00 3.350610351562500000e+02 -9.025000000000000000e+01 5.225000000000000000e+01
5.300000000000000000e+01 7.681999999999997044e+02 2.773247375488281250e+02 -3.055999755859375000e+00 1.096836999058723450e-01 5.882353186607360840e-01 1.989874145507812500e+03 1.939920067787170410e+00 4.000000000000000000e+00 2.918075866699218750e+02 -8.925000000000000000e+01 5.225000000000000000e+01
5.700000000000000000e+01 7.455769230769230944e+02 2.762142639160156250e+02 -3.177612304687500000e+00 1.181697025895118713e-01 0.000000000000000000e+00 1.970515380859375000e+03 1.535601615905761719e+00 4.000000000000000000e+00 2.621456604003906250e+02 -8.875000000000000000e+01 5.225000000000000000e+01
6.300000000000000000e+01 7.279769230769236401e+02 2.770460510253906250e+02 -3.299255371093750000e+00 1.233230829238891602e-01 2.941176593303680420e-01 1.951156738281250000e+03 1.933636188507080078e+00 4.000000000000000000e+00 2.520926513671875000e+02 -8.825000000000000000e+01 5.225000000000000000e+01
4.600000000000000000e+01 7.101999999999999318e+02 2.776895751953125000e+02 -3.378906250000000000e+00 1.375659108161926270e-01 0.000000000000000000e+00 1.938261718750000000e+03 1.917183756828308105e+00 4.000000000000000000e+00 2.606851196289062500e+02 -8.775000000000000000e+01 5.225000000000000000e+01
1.300000000000000000e+01 6.844538461538460297e+02 2.792373657226562500e+02 -3.510284423828125000e+00 1.201531291007995605e-01 0.000000000000000000e+00 1.916780761718750000e+03 1.932011604309082031e+00 1.000000000000000000e+00 2.086236114501953125e+02 -8.675000000000000000e+01 5.225000000000000000e+01
1.700000000000000000e+01 6.656153846153843006e+02 2.798366699218750000e+02 -3.575958251953125000e+00 1.201978400349617004e-01 0.000000000000000000e+00 1.906040405273437500e+03 1.930486559867858887e+00 1.000000000000000000e+00 1.837758636474609375e+02 -8.625000000000000000e+01 5.225000000000000000e+01
5.900000000000000000e+01 6.372076923076923549e+02 2.920209045410156250e+02 -3.369140625000000000e+00 1.367470026016235352e-01 5.294117927551269531e-01 1.918243041992187500e+03 1.894285559654235840e+00 4.000000000000000000e+00 1.554116058349609375e+02 -8.475000000000000000e+01 5.225000000000000000e+01
3.200000000000000000e+01 6.221538461538460751e+02 3.115459289550781250e+02 -3.267242431640625000e+00 1.257717162370681763e-01 2.941176593303680420e-01 1.924666748046875000e+03 1.888614773750305176e+00 3.000000000000000000e+00 1.271269683837890625e+02 -8.425000000000000000e+01 5.225000000000000000e+01
6.000000000000000000e+00 6.172846153846153356e+02 3.352937927246093750e+02 -3.066467285156250000e+00 1.201985552906990051e-01 0.000000000000000000e+00 1.938158569335937500e+03 1.878993988037109375e+00 1.000000000000000000e+00 8.603842926025390625e+01 -8.375000000000000000e+01 5.225000000000000000e+01
3.800000000000000000e+01 6.066615384615383846e+02 3.386948547363281250e+02 -2.865692138671875000e+00 1.173500120639801025e-01 0.000000000000000000e+00 1.951650390625000000e+03 1.869069933891296387e+00 3.000000000000000000e+00 5.864216995239257812e+01 -8.325000000000000000e+01 5.225000000000000000e+01
2.800000000000000000e+01 5.934076923076922867e+02 3.376535644531250000e+02 -2.664916992187500000e+00 1.144655197858810425e-01 0.000000000000000000e+00 1.965142211914062500e+03 1.866454124450683594e+00 3.000000000000000000e+00 4.468138504028320312e+01 -8.275000000000000000e+01 5.225000000000000000e+01
2.400000000000000000e+01 5.785538461538461661e+02 3.369729614257812500e+02 -2.773864746093750000e+00 1.125414073467254639e-01 0.000000000000000000e+00 1.864672119140625000e+03 1.865608692169189453e+00 3.000000000000000000e+00 3.834385681152343750e+01 -8.225000000000000000e+01 5.225000000000000000e+01
1.400000000000000000e+01 6.888846153846154721e+02 3.673020019531250000e+02 -2.598663330078125000e+00 1.186616718769073486e-01 0.000000000000000000e+00 1.906228149414062500e+03 7.376835942268371582e-01 1.000000000000000000e+00 2.981931495666503906e+01 -7.825000000000000000e+01 5.225000000000000000e+01
5.200000000000000000e+01 7.152307692307695106e+02 3.755381469726562500e+02 -2.871612548828125000e+00 1.451748162508010864e-01 4.117647111415863037e-01 1.860370117187500000e+03 7.304226160049438477e-01 4.000000000000000000e+00 1.307817840576171875e+02 -7.775000000000000000e+01 5.225000000000000000e+01
3.500000000000000000e+01 7.376076923076921048e+02 3.829247131347656250e+02 -3.144561767578125000e+00 1.770375072956085205e-01 2.941176593303680420e-01 1.814512084960937500e+03 7.210268974304199219e-01 3.000000000000000000e+00 1.767404937744140625e+02 -7.725000000000000000e+01 5.225000000000000000e+01
1.900000000000000000e+01 7.715999999999996817e+02 3.868736877441406250e+02 -3.415435791015625000e+00 2.117312997579574585e-01 5.882353186607360840e-01 1.769912597656250000e+03 7.099088430404663086e-01 1.000000000000000000e+00 2.339751586914062500e+02 -7.675000000000000000e+01 5.225000000000000000e+01
5.100000000000000000e+01 7.862692307692307168e+02 3.892125549316406250e+02 -3.680145263671875000e+00 1.849405467510223389e-01 2.941176593303680420e-01 1.729088745117187500e+03 7.064110040664672852e-01 4.000000000000000000e+00 2.368056945800781250e+02 -7.625000000000000000e+01 5.225000000000000000e+01
4.400000000000000000e+01 7.900384615384616609e+02 3.962476501464843750e+02 -3.944824218750000000e+00 1.907654553651809692e-01 9.411764740943908691e-01 1.688264892578125000e+03 9.010095596313476562e-01 3.000000000000000000e+00 2.749458007812500000e+02 -7.575000000000000000e+01 5.225000000000000000e+01
4.500000000000000000e+01 7.955692307692307850e+02 4.055935974121093750e+02 -4.209503173828125000e+00 2.120041847229003906e-01 6.470588445663452148e-01 1.647441040039062500e+03 7.306227684020996094e-01 4.000000000000000000e+00 2.878169555664062500e+02 -7.525000000000000000e+01 5.225000000000000000e+01
3.100000000000000000e+01 8.713153846153846871e+02 4.032855834960937500e+02 -4.615051269531250000e+00 2.757488489151000977e-01 7.058823704719543457e-01 1.559695068359375000e+03 1.511428356170654297e+00 3.000000000000000000e+00 3.833216552734375000e+02 -7.375000000000000000e+01 5.225000000000000000e+01
2.300000000000000000e+01 8.922538461538465526e+02 4.010682983398437500e+02 -4.716033935546875000e+00 3.130624592304229736e-01 5.882353186607360840e-01 1.513739501953125000e+03 6.618939042091369629e-01 3.000000000000000000e+00 4.525880737304687500e+02 -7.275000000000000000e+01 5.225000000000000000e+01
2.400000000000000000e+01 9.471076923076924459e+02 4.028698730468750000e+02 -4.668487548828125000e+00 4.119878113269805908e-01 6.470588445663452148e-01 1.497354736328125000e+03 6.883936524391174316e-01 3.000000000000000000e+00 5.373118896484375000e+02 -7.225000000000000000e+01 5.225000000000000000e+01
5.300000000000000000e+01 9.793999999999997499e+02 4.044702148437500000e+02 -4.620941162109375000e+00 5.262298583984375000e-01 8.235294222831726074e-01 1.480970092773437500e+03 8.974688649177551270e-01 4.000000000000000000e+00 6.140061645507812500e+02 -7.175000000000000000e+01 5.225000000000000000e+01
1.300000000000000000e+01 9.609923076923075769e+02 4.060129699707031250e+02 -4.573394775390625000e+00 4.324540495872497559e-01 2.941176593303680420e-01 1.464585449218750000e+03 1.023501276969909668e+00 1.000000000000000000e+00 6.834646606445312500e+02 -7.125000000000000000e+01 5.225000000000000000e+01
3.400000000000000000e+01 9.935230769230765873e+02 4.113898620605468750e+02 -4.536773681640625000e+00 6.456978321075439453e-01 2.941176593303680420e-01 1.455945312500000000e+03 1.219814896583557129e+00 3.000000000000000000e+00 8.649734497070312500e+02 -7.075000000000000000e+01 5.225000000000000000e+01
2.900000000000000000e+01 9.855538461538459387e+02 4.416241149902343750e+02 -4.449218750000000000e+00 3.652600944042205811e-01 5.882353186607360840e-01 1.430436279296875000e+03 1.613513588905334473e+00 3.000000000000000000e+00 6.627029418945312500e+02 -6.925000000000000000e+01 5.225000000000000000e+01
5.200000000000000000e+01 9.791769230769234582e+02 4.828850097656250000e+02 -4.657836914062500000e+00 3.442216813564300537e-01 2.941176593303680420e-01 1.405895629882812500e+03 1.223823308944702148e+00 4.000000000000000000e+00 6.593026123046875000e+02 -6.725000000000000000e+01 5.225000000000000000e+01
5.100000000000000000e+01 8.969230769230767919e+02 4.839289550781250000e+02 -4.706604003906250000e+00 3.013567030429840088e-01 2.941176593303680420e-01 1.405776855468750000e+03 1.563863754272460938e+00 4.000000000000000000e+00 5.849812011718750000e+02 -6.675000000000000000e+01 5.225000000000000000e+01
1.600000000000000000e+01 7.997538461538459842e+02 4.796292724609375000e+02 -4.804168701171875000e+00 3.348051607608795166e-01 0.000000000000000000e+00 1.405539184570312500e+03 1.608154773712158203e+00 1.000000000000000000e+00 5.894629516601562500e+02 -6.575000000000000000e+01 5.225000000000000000e+01
4.600000000000000000e+01 8.382000000000001592e+02 4.594784851074218750e+02 -4.767791748046875000e+00 4.173228740692138672e-01 0.000000000000000000e+00 1.412469238281250000e+03 1.590043902397155762e+00 4.000000000000000000e+00 6.789588623046875000e+02 -6.525000000000000000e+01 5.225000000000000000e+01
4.100000000000000000e+01 8.858615384615382027e+02 4.234013977050781250e+02 -4.703063964843750000e+00 3.099287748336791992e-01 0.000000000000000000e+00 1.421748901367187500e+03 1.583799481391906738e+00 3.000000000000000000e+00 5.970218505859375000e+02 -6.475000000000000000e+01 5.225000000000000000e+01
2.300000000000000000e+01 9.039692307692309896e+02 3.955249938964843750e+02 -4.638336181640625000e+00 2.994574606418609619e-01 0.000000000000000000e+00 1.431028686523437500e+03 1.595801115036010742e+00 3.000000000000000000e+00 5.318776245117187500e+02 -6.425000000000000000e+01 5.225000000000000000e+01
4.700000000000000000e+01 9.292999999999994998e+02 3.921983642578125000e+02 -4.573608398437500000e+00 2.160229980945587158e-01 2.352941185235977173e-01 1.440308349609375000e+03 1.604052305221557617e+00 4.000000000000000000e+00 4.947520446777343750e+02 -6.375000000000000000e+01 5.225000000000000000e+01
4.000000000000000000e+01 9.503230769230772239e+02 3.907983093261718750e+02 -4.349700927734375000e+00 2.505666613578796387e-01 0.000000000000000000e+00 1.455065673828125000e+03 1.460273742675781250e+00 3.000000000000000000e+00 5.462098388671875000e+02 -6.325000000000000000e+01 5.225000000000000000e+01
4.700000000000000000e+01 9.822999999999999545e+02 3.935346374511718750e+02 -4.125793457031250000e+00 2.445173114538192749e-01 0.000000000000000000e+00 1.469822998046875000e+03 1.550946116447448730e+00 4.000000000000000000e+00 5.274482421875000000e+02 -6.275000000000000000e+01 5.225000000000000000e+01
6.800000000000000000e+01 1.022969230769230990e+03 4.330146484375000000e+02 -3.640930175781250000e+00 1.899333000183105469e-01 0.000000000000000000e+00 1.498712524414062500e+03 1.623823642730712891e+00 4.000000000000000000e+00 4.749559326171875000e+02 -6.175000000000000000e+01 5.225000000000000000e+01
6.800000000000000000e+01 1.048123076923076724e+03 4.568274536132812500e+02 -3.268737792968750000e+00 1.776243299245834351e-01 0.000000000000000000e+00 1.510969726562500000e+03 1.626996517181396484e+00 4.000000000000000000e+00 4.361133728027343750e+02 -6.125000000000000000e+01 5.225000000000000000e+01
6.900000000000000000e+01 1.067169230769231717e+03 4.853880615234375000e+02 -2.896545410156250000e+00 1.389860808849334717e-01 2.352941185235977173e-01 1.523227050781250000e+03 1.629170417785644531e+00 4.000000000000000000e+00 3.710461730957031250e+02 -6.075000000000000000e+01 5.225000000000000000e+01
6.700000000000000000e+01 1.117169230769230353e+03 5.130500488281250000e+02 -2.177520751953125000e+00 1.532130539417266846e-01 2.941176593303680420e-01 1.544548950195312500e+03 1.592378735542297363e+00 4.000000000000000000e+00 4.391159057617187500e+02 -5.975000000000000000e+01 5.225000000000000000e+01
1.300000000000000000e+01 1.136723076923076405e+03 5.299232788085937500e+02 -1.855987548828125000e+00 1.430359482765197754e-01 0.000000000000000000e+00 1.550421142578125000e+03 9.485390186309814453e-01 1.000000000000000000e+00 4.383841857910156250e+02 -5.925000000000000000e+01 5.225000000000000000e+01
4.500000000000000000e+01 1.167907692307692741e+03 5.509283447265625000e+02 -1.534454345703125000e+00 1.641822308301925659e-01 0.000000000000000000e+00 1.556293457031250000e+03 9.134303331375122070e-01 4.000000000000000000e+00 5.152407226562500000e+02 -5.875000000000000000e+01 5.225000000000000000e+01
6.100000000000000000e+01 1.172469230769231444e+03 5.574579467773437500e+02 -1.212951660156250000e+00 9.999999776482582092e-03 0.000000000000000000e+00 1.562165649414062500e+03 1.375530242919921875e+00 4.000000000000000000e+00 3.617422485351562500e+02 -5.825000000000000000e+01 5.225000000000000000e+01
5.100000000000000000e+01 1.195646153846153993e+03 5.082822570800781250e+02 -3.425598144531250000e-01 9.999999776482582092e-03 0.000000000000000000e+00 1.553686279296875000e+03 6.005246043205261230e-01 4.000000000000000000e+00 3.579460144042968750e+02 -5.675000000000000000e+01 5.225000000000000000e+01
3.000000000000000000e+01 1.181707692307692014e+03 4.479214782714843750e+02 -5.526733398437500000e-02 9.999999776482582092e-03 0.000000000000000000e+00 1.550068969726562500e+03 6.034866571426391602e-01 3.000000000000000000e+00 2.046462249755859375e+02 -5.625000000000000000e+01 5.225000000000000000e+01
3.600000000000000000e+01 5.024461538461538339e+02 1.520909576416015625e+02 -7.103271484375000000e-01 0.000000000000000000e+00 0.000000000000000000e+00 2.429514892578125000e+03 8.722255825996398926e-01 3.000000000000000000e+00 2.605032653808593750e+02 -9.925000000000000000e+01 5.275000000000000000e+01
6.200000000000000000e+01 6.298230769230769965e+02 1.225549392700195312e+02 -1.649658203125000000e+00 0.000000000000000000e+00 5.882353186607360840e-01 2.312769531250000000e+03 8.392591476440429688e-01 4.000000000000000000e+00 2.684009094238281250e+02 -9.625000000000000000e+01 5.275000000000000000e+01
6.800000000000000000e+01 6.358230769230769965e+02 1.531148223876953125e+02 -1.899169921875000000e+00 9.999999776482582092e-03 8.823529481887817383e-01 2.271010498046875000e+03 8.420237898826599121e-01 4.000000000000000000e+00 2.983446960449218750e+02 -9.575000000000000000e+01 5.275000000000000000e+01
3.500000000000000000e+01 6.674153846153848235e+02 2.610229187011718750e+02 -2.381195068359375000e+00 9.999999776482582092e-03 7.647058963775634766e-01 2.174449707031250000e+03 8.358255624771118164e-01 3.000000000000000000e+00 3.272039184570312500e+02 -9.425000000000000000e+01 5.275000000000000000e+01
5.600000000000000000e+01 7.119846153846153811e+02 2.704045104980468750e+02 -2.626342773437500000e+00 9.999999776482582092e-03 3.529411852359771729e-01 2.116957031250000000e+03 8.346176743507385254e-01 4.000000000000000000e+00 3.143724365234375000e+02 -9.325000000000000000e+01 5.275000000000000000e+01
6.700000000000000000e+01 7.149615384615384528e+02 2.663558349609375000e+02 -2.718872070312500000e+00 9.999999776482582092e-03 5.882353186607360840e-01 2.090781005859375000e+03 1.008666872978210449e+00 4.000000000000000000e+00 3.087387084960937500e+02 -9.275000000000000000e+01 5.275000000000000000e+01
2.000000000000000000e+01 7.309846153846153811e+02 2.616279296875000000e+02 -2.811401367187500000e+00 9.999999776482582092e-03 0.000000000000000000e+00 2.064604980468750000e+03 1.490094661712646484e+00 3.000000000000000000e+00 3.155201416015625000e+02 -9.225000000000000000e+01 5.275000000000000000e+01
6.500000000000000000e+01 7.452076923076917865e+02 2.687752075195312500e+02 -2.904876708984375000e+00 1.195028722286224365e-01 0.000000000000000000e+00 2.039539428710937500e+03 1.956904649734497070e+00 4.000000000000000000e+00 3.172637023925781250e+02 -9.175000000000000000e+01 5.275000000000000000e+01
5.300000000000000000e+01 7.573538461538458932e+02 2.642536315917968750e+02 -3.001190185546875000e+00 1.373559385538101196e-01 4.117647111415863037e-01 2.017805419921875000e+03 1.940058231353759766e+00 4.000000000000000000e+00 3.313486938476562500e+02 -9.125000000000000000e+01 5.275000000000000000e+01
2.900000000000000000e+01 7.513923076923074404e+02 2.671164855957031250e+02 -3.193847656250000000e+00 1.362945884466171265e-01 0.000000000000000000e+00 1.974337524414062500e+03 1.941096425056457520e+00 3.000000000000000000e+00 3.020862731933593750e+02 -9.025000000000000000e+01 5.275000000000000000e+01
3.900000000000000000e+01 7.460461538461538566e+02 2.653229675292968750e+02 -3.304443359375000000e+00 1.437240839004516602e-01 2.352941185235977173e-01 1.952621459960937500e+03 1.927894949913024902e+00 3.000000000000000000e+00 2.833059082031250000e+02 -8.975000000000000000e+01 5.275000000000000000e+01
6.500000000000000000e+01 7.372538461538462116e+02 2.622814941406250000e+02 -3.429290771484375000e+00 1.475285291671752930e-01 5.882352963089942932e-02 1.930923339843750000e+03 1.918569684028625488e+00 4.000000000000000000e+00 2.723562316894531250e+02 -8.925000000000000000e+01 5.275000000000000000e+01
5.300000000000000000e+01 7.107923076923078725e+02 2.684473266601562500e+02 -3.679016113281250000e+00 1.732140183448791504e-01 1.176470592617988586e-01 1.887526977539062500e+03 1.906288862228393555e+00 4.000000000000000000e+00 2.437927093505859375e+02 -8.825000000000000000e+01 5.275000000000000000e+01
3.100000000000000000e+01 6.900692307692310123e+02 2.763525695800781250e+02 -3.826354980468750000e+00 1.890784502029418945e-01 0.000000000000000000e+00 1.858174438476562500e+03 1.883088350296020508e+00 3.000000000000000000e+00 2.004393463134765625e+02 -8.725000000000000000e+01 5.275000000000000000e+01
4.000000000000000000e+01 6.649000000000000909e+02 2.776918640136718750e+02 -3.892700195312500000e+00 1.576946079730987549e-01 0.000000000000000000e+00 1.844501220703125000e+03 1.903575420379638672e+00 3.000000000000000000e+00 1.848229827880859375e+02 -8.675000000000000000e+01 5.275000000000000000e+01
6.000000000000000000e+01 6.536769230769225487e+02 2.768323669433593750e+02 -3.959075927734375000e+00 1.661595106124877930e-01 0.000000000000000000e+00 1.830828125000000000e+03 1.899810552597045898e+00 4.000000000000000000e+00 1.685070953369140625e+02 -8.625000000000000000e+01 5.275000000000000000e+01
2.800000000000000000e+01 6.450846153846152902e+02 2.736302185058593750e+02 -3.885375976562500000e+00 1.711216270923614502e-01 0.000000000000000000e+00 1.832346191406250000e+03 1.881765961647033691e+00 3.000000000000000000e+00 1.574799804687500000e+02 -8.575000000000000000e+01 5.275000000000000000e+01
3.100000000000000000e+01 6.332692307692306031e+02 2.720780639648437500e+02 -3.811676025390625000e+00 1.738470494747161865e-01 2.352941185235977173e-01 1.833864257812500000e+03 1.867064237594604492e+00 3.000000000000000000e+00 1.412233734130859375e+02 -8.525000000000000000e+01 5.275000000000000000e+01
4.000000000000000000e+01 6.230538461538460524e+02 2.747363281250000000e+02 -3.737976074218750000e+00 1.877507418394088745e-01 0.000000000000000000e+00 1.835382324218750000e+03 1.857537746429443359e+00 3.000000000000000000e+00 1.446756896972656250e+02 -8.475000000000000000e+01 5.275000000000000000e+01
3.000000000000000000e+01 6.053461538461538112e+02 2.846905212402343750e+02 -3.632995605468750000e+00 1.601949185132980347e-01 5.882353186607360840e-01 1.839464355468750000e+03 1.853041768074035645e+00 3.000000000000000000e+00 9.759201049804687500e+01 -8.425000000000000000e+01 5.275000000000000000e+01
3.200000000000000000e+01 5.986923076923076223e+02 3.064707946777343750e+02 -3.434051513671875000e+00 1.628028005361557007e-01 0.000000000000000000e+00 1.851237792968750000e+03 1.842801570892333984e+00 3.000000000000000000e+00 7.985486602783203125e+01 -8.375000000000000000e+01 5.275000000000000000e+01
1.200000000000000000e+01 5.899307692307691013e+02 3.188478698730468750e+02 -3.235107421875000000e+00 1.553585827350616455e-01 3.529411852359771729e-01 1.863011230468750000e+03 1.831408619880676270e+00 1.000000000000000000e+00 4.284396362304687500e+01 -8.325000000000000000e+01 5.275000000000000000e+01
5.500000000000000000e+01 5.779461538461537202e+02 3.236518859863281250e+02 -3.036193847656250000e+00 1.503096073865890503e-01 0.000000000000000000e+00 1.874784667968750000e+03 1.828247189521789551e+00 4.000000000000000000e+00 2.268241500854492188e+01 -8.275000000000000000e+01 5.275000000000000000e+01
1.100000000000000000e+01 6.781000000000002501e+02 3.767337036132812500e+02 -2.935882568359375000e+00 1.489255726337432861e-01 0.000000000000000000e+00 1.825751098632812500e+03 7.258946299552917480e-01 1.000000000000000000e+00 6.026620483398437500e+01 -7.825000000000000000e+01 5.275000000000000000e+01
1.700000000000000000e+01 7.046846153846153129e+02 3.823118286132812500e+02 -3.202636718750000000e+00 1.888113319873809814e-01 0.000000000000000000e+00 1.783880981445312500e+03 7.170402407646179199e-01 1.000000000000000000e+00 1.279920120239257812e+02 -7.775000000000000000e+01 5.275000000000000000e+01
3.900000000000000000e+01 7.264153846153844825e+02 3.857262573242187500e+02 -3.469360351562500000e+00 2.114136964082717896e-01 0.000000000000000000e+00 1.742010864257812500e+03 7.084628939628601074e-01 3.000000000000000000e+00 1.912310638427734375e+02 -7.725000000000000000e+01 5.275000000000000000e+01
2.500000000000000000e+01 7.725846153846152902e+02 3.859028320312500000e+02 -3.992401123046875000e+00 2.342623770236968994e-01 0.000000000000000000e+00 1.663889160156250000e+03 6.919341087341308594e-01 3.000000000000000000e+00 2.399043426513671875e+02 -7.625000000000000000e+01 5.275000000000000000e+01
2.900000000000000000e+01 7.795923076923075996e+02 3.816817626953125000e+02 -4.250793457031250000e+00 2.527895867824554443e-01 5.882353186607360840e-01 1.626513793945312500e+03 6.894083619117736816e-01 3.000000000000000000e+00 2.599295959472656250e+02 -7.575000000000000000e+01 5.275000000000000000e+01
2.000000000000000000e+01 7.870230769230770420e+02 3.809543151855468750e+02 -4.509155273437500000e+00 2.714009582996368408e-01 5.882353186607360840e-01 1.589138549804687500e+03 6.834262609481811523e-01 3.000000000000000000e+00 2.890841674804687500e+02 -7.525000000000000000e+01 5.275000000000000000e+01
4.100000000000000000e+01 8.292923076923077588e+02 3.821936035156250000e+02 -4.689697265625000000e+00 3.361473381519317627e-01 3.529411852359771729e-01 1.558064575195312500e+03 6.689332723617553711e-01 3.000000000000000000e+00 3.693159484863281250e+02 -7.475000000000000000e+01 5.275000000000000000e+01
5.100000000000000000e+01 8.382769230769222304e+02 3.863203735351562500e+02 -4.792388916015625000e+00 3.721698522567749023e-01 8.823529481887817383e-01 1.533292236328125000e+03 6.609249711036682129e-01 4.000000000000000000e+00 3.722649841308593750e+02 -7.425000000000000000e+01 5.275000000000000000e+01
5.400000000000000000e+01 8.487769230769233673e+02 3.889319458007812500e+02 -4.895080566406250000e+00 3.320329487323760986e-01 0.000000000000000000e+00 1.508519775390625000e+03 6.570490598678588867e-01 4.000000000000000000e+00 3.901697082519531250e+02 -7.375000000000000000e+01 5.275000000000000000e+01
1.700000000000000000e+01 8.575923076923079407e+02 3.925819702148437500e+02 -4.997772216796875000e+00 4.324283003807067871e-01 2.941176593303680420e-01 1.483747436523437500e+03 6.550968289375305176e-01 1.000000000000000000e+00 4.755109558105468750e+02 -7.325000000000000000e+01 5.275000000000000000e+01
1.600000000000000000e+01 8.710615384615377934e+02 3.954797363281250000e+02 -4.988983154296875000e+00 3.816587626934051514e-01 8.823529481887817383e-01 1.465323852539062500e+03 6.486997008323669434e-01 1.000000000000000000e+00 4.891681213378906250e+02 -7.275000000000000000e+01 5.275000000000000000e+01
2.400000000000000000e+01 8.935846153846157449e+02 3.993074951171875000e+02 -4.943054199218750000e+00 3.741276860237121582e-01 2.941176593303680420e-01 1.449016479492187500e+03 7.367696166038513184e-01 3.000000000000000000e+00 4.714584045410156250e+02 -7.225000000000000000e+01 5.275000000000000000e+01
4.000000000000000000e+01 9.501076923076926732e+02 4.025619506835937500e+02 -4.897094726562500000e+00 4.496317803859710693e-01 7.647058963775634766e-01 1.432709228515625000e+03 1.047899127006530762e+00 3.000000000000000000e+00 5.595378417968750000e+02 -7.175000000000000000e+01 5.275000000000000000e+01
2.500000000000000000e+01 9.308615384615384301e+02 4.047433471679687500e+02 -4.851165771484375000e+00 4.405549168586730957e-01 3.529411852359771729e-01 1.416401855468750000e+03 1.086697459220886230e+00 3.000000000000000000e+00 5.636305541992187500e+02 -7.125000000000000000e+01 5.275000000000000000e+01
7.000000000000000000e+00 9.495846153846155175e+02 4.395285949707031250e+02 -4.781890869140625000e+00 3.900029957294464111e-01 2.941176593303680420e-01 1.385485717773437500e+03 1.344387888908386230e+00 1.000000000000000000e+00 6.316572875976562500e+02 -6.975000000000000000e+01 5.275000000000000000e+01
3.100000000000000000e+01 9.548923076923078952e+02 4.550722656250000000e+02 -4.783691406250000000e+00 4.037780463695526123e-01 0.000000000000000000e+00 1.375436523437500000e+03 1.346886992454528809e+00 3.000000000000000000e+00 6.483457641601562500e+02 -6.925000000000000000e+01 5.275000000000000000e+01
1.600000000000000000e+01 9.683615384615385437e+02 4.682633361816406250e+02 -4.860168457031250000e+00 3.764705061912536621e-01 0.000000000000000000e+00 1.366156250000000000e+03 1.342240810394287109e+00 1.000000000000000000e+00 6.706712036132812500e+02 -6.875000000000000000e+01 5.275000000000000000e+01
1.600000000000000000e+01 9.649076923076922867e+02 4.768474426269531250e+02 -4.936614990234375000e+00 3.820409178733825684e-01 2.941176593303680420e-01 1.356875854492187500e+03 1.326101064682006836e+00 1.000000000000000000e+00 6.478508300781250000e+02 -6.825000000000000000e+01 5.275000000000000000e+01
3.800000000000000000e+01 9.553384615384610470e+02 4.794615173339843750e+02 -5.013061523437500000e+00 3.748289048671722412e-01 0.000000000000000000e+00 1.347595581054687500e+03 1.316919803619384766e+00 3.000000000000000000e+00 6.437436523437500000e+02 -6.775000000000000000e+01 5.275000000000000000e+01
2.600000000000000000e+01 9.176615384615381572e+02 4.800156250000000000e+02 -5.088928222656250000e+00 5.171590447425842285e-01 5.882352963089942932e-02 1.341975830078125000e+03 9.452934265136718750e-01 3.000000000000000000e+00 6.918314819335937500e+02 -6.725000000000000000e+01 5.275000000000000000e+01
1.200000000000000000e+01 8.828846153846159268e+02 4.801407165527343750e+02 -5.164154052734375000e+00 3.504050374031066895e-01 2.941176593303680420e-01 1.340016723632812500e+03 1.340147614479064941e+00 1.000000000000000000e+00 6.053684082031250000e+02 -6.675000000000000000e+01 5.275000000000000000e+01
3.900000000000000000e+01 9.557076923076923549e+02 3.646621704101562500e+02 -4.872497558593750000e+00 3.264421820640563965e-01 0.000000000000000000e+00 1.384717163085937500e+03 1.524299383163452148e+00 3.000000000000000000e+00 5.570805664062500000e+02 -6.325000000000000000e+01 5.275000000000000000e+01
6.300000000000000000e+01 9.801461538461541068e+02 4.455589599609375000e+02 -4.092376708984375000e+00 1.841091364622116089e-01 0.000000000000000000e+00 1.433473510742187500e+03 1.642592072486877441e+00 4.000000000000000000e+00 4.176113586425781250e+02 -6.175000000000000000e+01 5.275000000000000000e+01
5.300000000000000000e+01 1.051730769230769738e+03 5.005212402343750000e+02 -3.296936035156250000e+00 2.150969952344894409e-01 0.000000000000000000e+00 1.466199340820312500e+03 1.634405612945556641e+00 4.000000000000000000e+00 4.427646179199218750e+02 -6.075000000000000000e+01 5.275000000000000000e+01
7.200000000000000000e+01 1.055961538461538566e+03 5.103972167968750000e+02 -2.899200439453125000e+00 1.050765588879585266e-01 0.000000000000000000e+00 1.482562255859375000e+03 1.624013781547546387e+00 4.000000000000000000e+00 2.888370971679687500e+02 -6.025000000000000000e+01 5.275000000000000000e+01
6.000000000000000000e+01 1.104523076923076815e+03 5.159888305664062500e+02 -2.514648437500000000e+00 1.561134904623031616e-01 0.000000000000000000e+00 1.495607055664062500e+03 1.526994824409484863e+00 4.000000000000000000e+00 4.204334716796875000e+02 -5.975000000000000000e+01 5.275000000000000000e+01
5.100000000000000000e+01 1.130184615384615199e+03 5.247004394531250000e+02 -2.143249511718750000e+00 1.311841905117034912e-01 0.000000000000000000e+00 1.505333862304687500e+03 1.543492674827575684e+00 4.000000000000000000e+00 3.681112365722656250e+02 -5.925000000000000000e+01 5.275000000000000000e+01
4.300000000000000000e+01 1.144161538461538385e+03 5.363370971679687500e+02 -1.771850585937500000e+00 1.172099336981773376e-01 0.000000000000000000e+00 1.515060546875000000e+03 1.359657526016235352e+00 3.000000000000000000e+00 3.700299377441406250e+02 -5.875000000000000000e+01 5.275000000000000000e+01
6.300000000000000000e+01 1.173169230769230353e+03 5.426690673828125000e+02 -1.078857421875000000e+00 1.093920990824699402e-01 0.000000000000000000e+00 1.515560424804687500e+03 6.088246107101440430e-01 4.000000000000000000e+00 3.679127197265625000e+02 -5.775000000000000000e+01 5.275000000000000000e+01
5.900000000000000000e+01 1.175369230769231308e+03 5.247181396484375000e+02 -7.738342285156250000e-01 9.999999776482582092e-03 0.000000000000000000e+00 1.500015625000000000e+03 6.035017967224121094e-01 4.000000000000000000e+00 3.426024475097656250e+02 -5.725000000000000000e+01 5.275000000000000000e+01
5.600000000000000000e+01 1.158899999999999864e+03 4.947033996582031250e+02 -4.688415527343750000e-01 9.999999776482582092e-03 0.000000000000000000e+00 1.484470825195312500e+03 6.118850708007812500e-01 4.000000000000000000e+00 1.988577880859375000e+02 -5.675000000000000000e+01 5.275000000000000000e+01
3.100000000000000000e+01 5.953230769230769965e+02 1.754204864501953125e+02 -1.989898681640625000e+00 9.999999776482582092e-03 2.352941185235977173e-01 2.268322021484375000e+03 9.838526844978332520e-01 3.000000000000000000e+00 2.564339599609375000e+02 -9.675000000000000000e+01 5.325000000000000000e+01
4.600000000000000000e+01 6.057769230769229125e+02 1.847959899902343750e+02 -2.228363037109375000e+00 9.999999776482582092e-03 0.000000000000000000e+00 2.232230712890625000e+03 1.451994657516479492e+00 4.000000000000000000e+00 2.757897644042968750e+02 -9.625000000000000000e+01 5.325000000000000000e+01
2.700000000000000000e+01 6.227461538461539021e+02 2.169930877685546875e+02 -2.466827392578125000e+00 9.999999776482582092e-03 2.941176593303680420e-01 2.196139648437500000e+03 1.356735467910766602e+00 3.000000000000000000e+00 3.003039245605468750e+02 -9.575000000000000000e+01 5.325000000000000000e+01
4.200000000000000000e+01 6.332076923076923549e+02 2.555144958496093750e+02 -2.627441406250000000e+00 9.999999776482582092e-03 6.470588445663452148e-01 2.164546630859375000e+03 8.248863220214843750e-01 3.000000000000000000e+00 2.995675964355468750e+02 -9.525000000000000000e+01 5.325000000000000000e+01
6.500000000000000000e+01 6.458615384615382027e+02 2.839701538085937500e+02 -2.762145996093750000e+00 9.999999776482582092e-03 2.352941185235977173e-01 2.134452880859375000e+03 8.243936300277709961e-01 4.000000000000000000e+00 3.031457824707031250e+02 -9.475000000000000000e+01 5.325000000000000000e+01
5.300000000000000000e+01 6.555769230769230944e+02 2.979230041503906250e+02 -2.896820068359375000e+00 9.999999776482582092e-03 5.294117927551269531e-01 2.104359375000000000e+03 8.218062520027160645e-01 4.000000000000000000e+00 3.032281799316406250e+02 -9.425000000000000000e+01 5.325000000000000000e+01
6.600000000000000000e+01 6.665538461538458250e+02 3.026637573242187500e+02 -3.031494140625000000e+00 9.999999776482582092e-03 8.235294222831726074e-01 2.074265625000000000e+03 8.786289691925048828e-01 4.000000000000000000e+00 2.834273376464843750e+02 -9.375000000000000000e+01 5.325000000000000000e+01
5.000000000000000000e+01 6.751153846153849827e+02 3.012684936523437500e+02 -3.096618652343750000e+00 1.132126897573471069e-01 2.352941185235977173e-01 2.051737304687500000e+03 1.876030206680297852e+00 4.000000000000000000e+00 3.010188903808593750e+02 -9.325000000000000000e+01 5.325000000000000000e+01
3.000000000000000000e+01 6.954615384615387939e+02 2.943443908691406250e+02 -3.161773681640625000e+00 1.206141486763954163e-01 8.235294222831726074e-01 2.029208984375000000e+03 1.216523289680480957e+00 3.000000000000000000e+00 3.080261840820312500e+02 -9.275000000000000000e+01 5.325000000000000000e+01
2.300000000000000000e+01 7.126153846153848690e+02 2.493943939208984375e+02 -3.294860839843750000e+00 1.506759375333786011e-01 2.352941185235977173e-01 1.984519287109375000e+03 1.947623014450073242e+00 3.000000000000000000e+00 3.067828979492187500e+02 -9.175000000000000000e+01 5.325000000000000000e+01
4.700000000000000000e+01 7.114846153846154948e+02 2.422872619628906250e+02 -3.371368408203125000e+00 1.507180333137512207e-01 2.352941185235977173e-01 1.963458618164062500e+03 1.930460691452026367e+00 4.000000000000000000e+00 2.805092468261718750e+02 -9.125000000000000000e+01 5.325000000000000000e+01
3.400000000000000000e+01 7.164769230769231854e+02 2.420272674560546875e+02 -3.447845458984375000e+00 1.734083294868469238e-01 7.647058963775634766e-01 1.942397827148437500e+03 1.913836359977722168e+00 3.000000000000000000e+00 2.853598022460937500e+02 -9.075000000000000000e+01 5.325000000000000000e+01
6.500000000000000000e+01 6.999230769230769056e+02 2.343572692871093750e+02 -3.621856689453125000e+00 1.658741533756256104e-01 3.529411852359771729e-01 1.898739501953125000e+03 1.925303339958190918e+00 4.000000000000000000e+00 2.605407714843750000e+02 -8.975000000000000000e+01 5.325000000000000000e+01
2.800000000000000000e+01 6.921923076923075087e+02 2.317482452392578125e+02 -3.859008789062500000e+00 2.013199627399444580e-01 5.882353186607360840e-01 1.850470336914062500e+03 1.914539813995361328e+00 3.000000000000000000e+00 2.490290527343750000e+02 -8.875000000000000000e+01 5.325000000000000000e+01
4.400000000000000000e+01 6.552538461538460979e+02 2.626879882812500000e+02 -4.130706787109375000e+00 2.003007531166076660e-01 0.000000000000000000e+00 1.789420776367187500e+03 1.895275712013244629e+00 3.000000000000000000e+00 1.805821228027343750e+02 -8.725000000000000000e+01 5.325000000000000000e+01
1.900000000000000000e+01 6.516538461538463025e+02 2.705459289550781250e+02 -4.201293945312500000e+00 2.102406024932861328e-01 0.000000000000000000e+00 1.771774169921875000e+03 1.877402305603027344e+00 1.000000000000000000e+00 1.670778808593750000e+02 -8.675000000000000000e+01 5.325000000000000000e+01
8.000000000000000000e+00 6.391692307692309214e+02 2.694108581542968750e+02 -4.271850585937500000e+00 2.099648863077163696e-01 0.000000000000000000e+00 1.754127685546875000e+03 1.856103897094726562e+00 1.000000000000000000e+00 1.409779663085937500e+02 -8.625000000000000000e+01 5.325000000000000000e+01
2.700000000000000000e+01 6.289615384615382254e+02 2.668523559570312500e+02 -4.207641601562500000e+00 2.135815173387527466e-01 0.000000000000000000e+00 1.751591430664062500e+03 1.840268492698669434e+00 3.000000000000000000e+00 1.217113189697265625e+02 -8.575000000000000000e+01 5.325000000000000000e+01
1.600000000000000000e+01 6.194538461538460297e+02 2.638179931640625000e+02 -4.143402099609375000e+00 2.213387191295623779e-01 0.000000000000000000e+00 1.749055175781250000e+03 1.752151250839233398e+00 1.000000000000000000e+00 1.140221328735351562e+02 -8.525000000000000000e+01 5.325000000000000000e+01
1.500000000000000000e+01 6.094999999999998863e+02 2.629344177246093750e+02 -4.079193115234375000e+00 2.317182719707489014e-01 0.000000000000000000e+00 1.746519042968750000e+03 1.817404866218566895e+00 1.000000000000000000e+00 1.092278289794921875e+02 -8.475000000000000000e+01 5.325000000000000000e+01
2.300000000000000000e+01 5.938846153846156994e+02 2.632060852050781250e+02 -3.986175537109375000e+00 2.283959537744522095e-01 5.294117927551269531e-01 1.746767822265625000e+03 1.813731074333190918e+00 3.000000000000000000e+00 1.181062011718750000e+02 -8.425000000000000000e+01 5.325000000000000000e+01
1.900000000000000000e+01 5.830230769230768146e+02 2.749636840820312500e+02 -3.806793212890625000e+00 2.192522138357162476e-01 0.000000000000000000e+00 1.755371582031250000e+03 1.802699327468872070e+00 1.000000000000000000e+00 8.047300720214843750e+01 -8.375000000000000000e+01 5.325000000000000000e+01
2.300000000000000000e+01 5.735769230769229807e+02 2.914974975585937500e+02 -3.627410888671875000e+00 2.261675596237182617e-01 0.000000000000000000e+00 1.763975341796875000e+03 1.792220592498779297e+00 3.000000000000000000e+00 6.600099182128906250e+01 -8.325000000000000000e+01 5.325000000000000000e+01
2.800000000000000000e+01 5.590923076923074859e+02 3.051062622070312500e+02 -3.448028564453125000e+00 2.036116719245910645e-01 0.000000000000000000e+00 1.772579101562500000e+03 1.795553088188171387e+00 3.000000000000000000e+00 3.398936080932617188e+01 -8.275000000000000000e+01 5.325000000000000000e+01
1.900000000000000000e+01 6.746230769230768374e+02 3.849951782226562500e+02 -3.327209472656250000e+00 2.453102618455886841e-01 2.941176593303680420e-01 1.732989135742187500e+03 1.022059440612792969e+00 1.000000000000000000e+00 1.156008605957031250e+02 -7.825000000000000000e+01 5.325000000000000000e+01
3.100000000000000000e+01 7.025000000000000000e+02 3.870953979492187500e+02 -3.573028564453125000e+00 2.723836302757263184e-01 5.882353186607360840e-01 1.697562133789062500e+03 6.982901692390441895e-01 3.000000000000000000e+00 1.709339904785156250e+02 -7.775000000000000000e+01 5.325000000000000000e+01
2.500000000000000000e+01 7.167384615384618201e+02 3.879168090820312500e+02 -3.818847656250000000e+00 2.937584221363067627e-01 0.000000000000000000e+00 1.662135131835937500e+03 6.941826343536376953e-01 3.000000000000000000e+00 2.129518890380859375e+02 -7.725000000000000000e+01 5.325000000000000000e+01
2.600000000000000000e+01 7.305769230769235492e+02 3.878283691406250000e+02 -4.062896728515625000e+00 2.764231562614440918e-01 0.000000000000000000e+00 1.627565673828125000e+03 6.902059912681579590e-01 3.000000000000000000e+00 1.884621582031250000e+02 -7.675000000000000000e+01 5.325000000000000000e+01
2.000000000000000000e+01 7.370999999999999091e+02 3.854174194335937500e+02 -4.301605224609375000e+00 2.898727059364318848e-01 0.000000000000000000e+00 1.595568725585937500e+03 6.884635686874389648e-01 3.000000000000000000e+00 2.307463989257812500e+02 -7.625000000000000000e+01 5.325000000000000000e+01
1.700000000000000000e+01 7.426538461538463025e+02 3.818313903808593750e+02 -4.540313720703125000e+00 2.972530126571655273e-01 0.000000000000000000e+00 1.563571655273437500e+03 6.868922710418701172e-01 1.000000000000000000e+00 2.635260009765625000e+02 -7.575000000000000000e+01 5.325000000000000000e+01
3.600000000000000000e+01 7.795615384615385892e+02 3.770758972167968750e+02 -5.035156250000000000e+00 3.807469904422760010e-01 5.882353186607360840e-01 1.482958984375000000e+03 6.730504631996154785e-01 3.000000000000000000e+00 3.942628479003906250e+02 -7.425000000000000000e+01 5.325000000000000000e+01
3.400000000000000000e+01 7.832538461538462116e+02 3.831689453125000000e+02 -5.126312255859375000e+00 4.209083616733551025e-01 3.529411852359771729e-01 1.461214233398437500e+03 6.720018386840820312e-01 3.000000000000000000e+00 4.429633789062500000e+02 -7.375000000000000000e+01 5.325000000000000000e+01
2.900000000000000000e+01 7.911769230769231172e+02 3.895017089843750000e+02 -5.217498779296875000e+00 3.786080181598663330e-01 8.823529481887817383e-01 1.439469360351562500e+03 6.686392426490783691e-01 3.000000000000000000e+00 4.351137390136718750e+02 -7.325000000000000000e+01 5.325000000000000000e+01
2.200000000000000000e+01 8.076461538461537657e+02 3.925545654296875000e+02 -5.208221435546875000e+00 4.120880961418151855e-01 6.470588445663452148e-01 1.422283325195312500e+03 6.634044647216796875e-01 3.000000000000000000e+00 4.853113708496093750e+02 -7.275000000000000000e+01 5.325000000000000000e+01
2.000000000000000000e+01 8.368538461538464617e+02 3.961760559082031250e+02 -5.165435791015625000e+00 5.005576610565185547e-01 5.882353186607360840e-01 1.406616943359375000e+03 8.568756580352783203e-01 3.000000000000000000e+00 5.591976318359375000e+02 -7.225000000000000000e+01 5.325000000000000000e+01
1.400000000000000000e+01 8.610076923076916273e+02 3.997536926269531250e+02 -5.122680664062500000e+00 4.640001356601715088e-01 2.941176593303680420e-01 1.390950439453125000e+03 1.167499184608459473e+00 1.000000000000000000e+00 5.223389892578125000e+02 -7.175000000000000000e+01 5.325000000000000000e+01
1.000000000000000000e+01 8.881076923076926732e+02 4.002487487792968750e+02 -5.079895019531250000e+00 5.087499022483825684e-01 5.882353186607360840e-01 1.375284057617187500e+03 1.234942555427551270e+00 1.000000000000000000e+00 5.364581909179687500e+02 -7.125000000000000000e+01 5.325000000000000000e+01
2.900000000000000000e+01 8.877384615384619337e+02 4.045847778320312500e+02 -5.071899414062500000e+00 4.439852535724639893e-01 6.470588445663452148e-01 1.363616943359375000e+03 1.293349504470825195e+00 3.000000000000000000e+00 5.481809082031250000e+02 -7.075000000000000000e+01 5.325000000000000000e+01
1.900000000000000000e+01 9.212615384615385210e+02 4.766853942871093750e+02 -5.349548339843750000e+00 4.552588164806365967e-01 0.000000000000000000e+00 1.297655151367187500e+03 1.267585873603820801e+00 1.000000000000000000e+00 6.612443237304687500e+02 -6.775000000000000000e+01 5.325000000000000000e+01
2.800000000000000000e+01 9.083461538461544933e+02 4.773371582031250000e+02 -5.437469482421875000e+00 4.778791069984436035e-01 0.000000000000000000e+00 1.291192382812500000e+03 1.280468940734863281e+00 3.000000000000000000e+00 6.098084716796875000e+02 -6.725000000000000000e+01 5.325000000000000000e+01
1.500000000000000000e+01 8.860461538461536293e+02 4.776923828125000000e+02 -5.521118164062500000e+00 4.055752456188201904e-01 0.000000000000000000e+00 1.288690551757812500e+03 1.295196294784545898e+00 1.000000000000000000e+00 5.787210693359375000e+02 -6.675000000000000000e+01 5.325000000000000000e+01
2.700000000000000000e+01 8.495538461538458250e+02 4.747892456054687500e+02 -5.604736328125000000e+00 3.748197853565216064e-01 0.000000000000000000e+00 1.286188842773437500e+03 1.301111102104187012e+00 3.000000000000000000e+00 5.304384765625000000e+02 -6.625000000000000000e+01 5.325000000000000000e+01
2.900000000000000000e+01 8.505846153846158586e+02 4.412506408691406250e+02 -5.661163330078125000e+00 5.131911635398864746e-01 0.000000000000000000e+00 1.289375244140625000e+03 1.295114874839782715e+00 3.000000000000000000e+00 6.244659423828125000e+02 -6.525000000000000000e+01 5.325000000000000000e+01
4.000000000000000000e+01 8.755923076923080544e+02 4.133798522949218750e+02 -5.597045898437500000e+00 3.790163695812225342e-01 0.000000000000000000e+00 1.297793457031250000e+03 1.301952004432678223e+00 3.000000000000000000e+00 4.982647094726562500e+02 -6.475000000000000000e+01 5.325000000000000000e+01
4.500000000000000000e+01 9.040538461538460524e+02 3.899581604003906250e+02 -5.532897949218750000e+00 3.562097549438476562e-01 0.000000000000000000e+00 1.306211547851562500e+03 1.433759927749633789e+00 4.000000000000000000e+00 4.988752136230468750e+02 -6.425000000000000000e+01 5.325000000000000000e+01
4.700000000000000000e+01 9.164153846153847098e+02 3.790404052734375000e+02 -5.191833496093750000e+00 2.710934579372406006e-01 0.000000000000000000e+00 1.331790649414062500e+03 1.619050979614257812e+00 4.000000000000000000e+00 3.474044799804687500e+02 -6.325000000000000000e+01 5.325000000000000000e+01
5.300000000000000000e+01 9.420923076923080544e+02 3.938801879882812500e+02 -4.914855957031250000e+00 3.288998901844024658e-01 0.000000000000000000e+00 1.348951538085937500e+03 1.505182743072509766e+00 4.000000000000000000e+00 4.313728332519531250e+02 -6.275000000000000000e+01 5.325000000000000000e+01
3.800000000000000000e+01 9.721000000000001364e+02 4.896927490234375000e+02 -3.896697998046875000e+00 2.190895080566406250e-01 5.294117927551269531e-01 1.398368286132812500e+03 1.668683290481567383e+00 3.000000000000000000e+00 4.190651245117187500e+02 -6.125000000000000000e+01 5.325000000000000000e+01
5.500000000000000000e+01 1.054130769230769374e+03 5.164175415039062500e+02 -2.626739501953125000e+00 1.773328036069869995e-01 0.000000000000000000e+00 1.443007080078125000e+03 1.235031008720397949e+00 4.000000000000000000e+00 4.746421203613281250e+02 -5.975000000000000000e+01 5.325000000000000000e+01
4.000000000000000000e+01 1.146369230769231081e+03 5.392594604492187500e+02 -1.815032958984375000e+00 1.723193824291229248e-01 0.000000000000000000e+00 1.466481445312500000e+03 1.489190340042114258e+00 3.000000000000000000e+00 4.635406188964843750e+02 -5.875000000000000000e+01 5.325000000000000000e+01
5.000000000000000000e+01 1.141030769230769693e+03 5.542840576171875000e+02 -1.409179687500000000e+00 1.092674583196640015e-01 0.000000000000000000e+00 1.478218627929687500e+03 1.379018187522888184e+00 4.000000000000000000e+00 3.130515747070312500e+02 -5.825000000000000000e+01 5.325000000000000000e+01
2.100000000000000000e+01 1.118661538461538157e+03 5.634777221679687500e+02 -1.080322265625000000e+00 9.999999776482582092e-03 0.000000000000000000e+00 1.456015502929687500e+03 1.300138235092163086e+00 3.000000000000000000e+00 1.431709442138671875e+02 -5.775000000000000000e+01 5.325000000000000000e+01
4.700000000000000000e+01 1.140469230769230307e+03 5.603167724609375000e+02 -7.771301269531250000e-01 9.999999776482582092e-03 0.000000000000000000e+00 1.422499023437500000e+03 8.451565504074096680e-01 4.000000000000000000e+00 2.891454467773437500e+02 -5.725000000000000000e+01 5.325000000000000000e+01
5.800000000000000000e+01 1.135253846153846325e+03 5.473773803710937500e+02 -4.739379882812500000e-01 9.999999776482582092e-03 0.000000000000000000e+00 1.388982543945312500e+03 6.168093681335449219e-01 4.000000000000000000e+00 1.702579040527343750e+02 -5.675000000000000000e+01 5.325000000000000000e+01
4.900000000000000000e+01 1.098192307692308077e+03 5.251268920898437500e+02 -1.707458496093750000e-01 9.999999776482582092e-03 0.000000000000000000e+00 1.355466064453125000e+03 6.190457344055175781e-01 4.000000000000000000e+00 7.643042755126953125e+01 -5.625000000000000000e+01 5.325000000000000000e+01
3.800000000000000000e+01 5.771538461538463025e+02 2.313519134521484375e+02 -2.579620361328125000e+00 9.999999776482582092e-03 0.000000000000000000e+00 2.182115234375000000e+03 1.955693721771240234e+00 3.000000000000000000e+00 2.479501190185546875e+02 -9.675000000000000000e+01 5.375000000000000000e+01
3.900000000000000000e+01 5.916692307692309214e+02 2.442601318359375000e+02 -2.807067871093750000e+00 9.999999776482582092e-03 2.352941185235977173e-01 2.151692138671875000e+03 1.942833065986633301e+00 3.000000000000000000e+00 2.593195190429687500e+02 -9.625000000000000000e+01 5.375000000000000000e+01
4.000000000000000000e+01 6.075846153846151765e+02 2.707598266601562500e+02 -3.034515380859375000e+00 9.999999776482582092e-03 7.647058963775634766e-01 2.121268798828125000e+03 1.588168978691101074e+00 3.000000000000000000e+00 2.621351318359375000e+02 -9.575000000000000000e+01 5.375000000000000000e+01
4.500000000000000000e+01 6.209384615384614108e+02 2.942345581054687500e+02 -3.178924560546875000e+00 1.096363291144371033e-01 8.235294222831726074e-01 2.092010009765625000e+03 1.433221101760864258e+00 4.000000000000000000e+00 2.690286254882812500e+02 -9.525000000000000000e+01 5.375000000000000000e+01
3.200000000000000000e+01 6.502923076923078725e+02 3.114085083007812500e+02 -3.529205322265625000e+00 1.361309885978698730e-01 8.823529481887817383e-01 2.005398071289062500e+03 1.964309573173522949e+00 3.000000000000000000e+00 2.362146606445312500e+02 -9.375000000000000000e+01 5.375000000000000000e+01
3.000000000000000000e+01 6.635692307692310123e+02 3.081683959960937500e+02 -3.566925048828125000e+00 1.498841643333435059e-01 1.058823585510253906e+00 1.986517578125000000e+03 1.951196908950805664e+00 3.000000000000000000e+00 2.604637451171875000e+02 -9.325000000000000000e+01 5.375000000000000000e+01
4.000000000000000000e+01 6.727000000000005002e+02 2.943747863769531250e+02 -3.604675292968750000e+00 1.644881367683410645e-01 5.294117927551269531e-01 1.967636962890625000e+03 1.485730528831481934e+00 3.000000000000000000e+00 2.696977539062500000e+02 -9.275000000000000000e+01 5.375000000000000000e+01
4.800000000000000000e+01 6.800076923076923094e+02 2.725176391601562500e+02 -3.642395019531250000e+00 1.684614568948745728e-01 2.352941185235977173e-01 1.948756469726562500e+03 7.941834926605224609e-01 4.000000000000000000e+00 2.481059875488281250e+02 -9.225000000000000000e+01 5.375000000000000000e+01
4.200000000000000000e+01 6.903230769230766555e+02 2.333312988281250000e+02 -3.741516113281250000e+00 2.104342579841613770e-01 5.294117927551269531e-01 1.909111694335937500e+03 1.889971017837524414e+00 3.000000000000000000e+00 2.624577636718750000e+02 -9.125000000000000000e+01 5.375000000000000000e+01
4.800000000000000000e+01 6.881307692307690331e+02 2.302144622802734375e+02 -3.798156738281250000e+00 2.142007946968078613e-01 2.941176593303680420e-01 1.888724243164062500e+03 1.873269438743591309e+00 4.000000000000000000e+00 2.308982391357421875e+02 -9.075000000000000000e+01 5.375000000000000000e+01
4.700000000000000000e+01 6.616615384615384983e+02 1.985491180419921875e+02 -4.051544189453125000e+00 2.194759547710418701e-01 0.000000000000000000e+00 1.818286621093750000e+03 1.888270139694213867e+00 4.000000000000000000e+00 2.083670043945312500e+02 -8.925000000000000000e+01 5.375000000000000000e+01
4.200000000000000000e+01 6.673846153846153584e+02 2.019547271728515625e+02 -4.163848876953125000e+00 2.458620965480804443e-01 1.764705926179885864e-01 1.791715698242187500e+03 1.877685070037841797e+00 3.000000000000000000e+00 2.018535614013671875e+02 -8.875000000000000000e+01 5.375000000000000000e+01
7.000000000000000000e+00 6.450000000000000000e+02 2.205868072509765625e+02 -4.360290527343750000e+00 2.404844611883163452e-01 0.000000000000000000e+00 1.742286987304687500e+03 1.861212730407714844e+00 1.000000000000000000e+00 1.504816436767578125e+02 -8.775000000000000000e+01 5.375000000000000000e+01
3.100000000000000000e+01 6.361230769230767237e+02 2.370370941162109375e+02 -4.435089111328125000e+00 2.369225025177001953e-01 0.000000000000000000e+00 1.720667114257812500e+03 1.852071642875671387e+00 3.000000000000000000e+00 1.313624725341796875e+02 -8.725000000000000000e+01 5.375000000000000000e+01
3.100000000000000000e+01 6.309461538461539476e+02 2.549205627441406250e+02 -4.509857177734375000e+00 2.523824572563171387e-01 0.000000000000000000e+00 1.699047119140625000e+03 1.834196925163269043e+00 3.000000000000000000e+00 1.261088714599609375e+02 -8.675000000000000000e+01 5.375000000000000000e+01
2.000000000000000000e+01 6.197692307692303757e+02 2.542100219726562500e+02 -4.584655761718750000e+00 2.731825113296508789e-01 0.000000000000000000e+00 1.677427124023437500e+03 1.816125988960266113e+00 3.000000000000000000e+00 1.251497039794921875e+02 -8.625000000000000000e+01 5.375000000000000000e+01
1.500000000000000000e+01 6.043307692307691923e+02 2.517203369140625000e+02 -4.475128173828125000e+00 2.884766161441802979e-01 0.000000000000000000e+00 1.664246215820312500e+03 1.790818333625793457e+00 1.000000000000000000e+00 1.005793380737304688e+02 -8.525000000000000000e+01 5.375000000000000000e+01
1.900000000000000000e+01 5.945769230769232081e+02 2.487057952880859375e+02 -4.420379638671875000e+00 2.945746779441833496e-01 8.823529481887817383e-01 1.657655639648437500e+03 1.779984712600708008e+00 1.000000000000000000e+00 9.806320190429687500e+01 -8.475000000000000000e+01 5.375000000000000000e+01
1.600000000000000000e+01 5.822769230769227988e+02 2.458327331542968750e+02 -4.339355468750000000e+00 2.934165596961975098e-01 0.000000000000000000e+00 1.654071289062500000e+03 1.769924521446228027e+00 1.000000000000000000e+00 9.957243347167968750e+01 -8.425000000000000000e+01 5.375000000000000000e+01
1.500000000000000000e+01 5.720076923076920821e+02 2.506355895996093750e+02 -4.179534912109375000e+00 2.925117015838623047e-01 0.000000000000000000e+00 1.659505371093750000e+03 1.757073163986206055e+00 1.000000000000000000e+00 9.218434143066406250e+01 -8.375000000000000000e+01 5.375000000000000000e+01
1.600000000000000000e+01 5.609769230769230717e+02 2.648627624511718750e+02 -4.019683837890625000e+00 2.934691011905670166e-01 2.941176593303680420e-01 1.664939453125000000e+03 1.746943473815917969e+00 1.000000000000000000e+00 7.235140991210937500e+01 -8.325000000000000000e+01 5.375000000000000000e+01
1.400000000000000000e+01 5.436538461538464162e+02 2.802610473632812500e+02 -3.859832763671875000e+00 2.707082033157348633e-01 0.000000000000000000e+00 1.670373535156250000e+03 1.751308202743530273e+00 1.000000000000000000e+00 4.363236618041992188e+01 -8.275000000000000000e+01 5.375000000000000000e+01
1.700000000000000000e+01 6.634384615384612971e+02 3.864309387207031250e+02 -3.718536376953125000e+00 2.850493788719177246e-01 2.941176593303680420e-01 1.640227050781250000e+03 1.383021473884582520e+00 1.000000000000000000e+00 6.589205932617187500e+01 -7.825000000000000000e+01 5.375000000000000000e+01
3.400000000000000000e+01 7.253153846153844597e+02 3.843352966308593750e+02 -4.610809326171875000e+00 3.194294273853302002e-01 0.000000000000000000e+00 1.527248168945312500e+03 7.788778543472290039e-01 3.000000000000000000e+00 1.874211120605468750e+02 -7.625000000000000000e+01 5.375000000000000000e+01
1.800000000000000000e+01 7.861692307692308077e+02 3.889653015136718750e+02 -5.427429199218750000e+00 4.475109279155731201e-01 0.000000000000000000e+00 1.379242919921875000e+03 7.159720659255981445e-01 1.000000000000000000e+00 4.024974365234375000e+02 -7.275000000000000000e+01 5.375000000000000000e+01
2.800000000000000000e+01 8.552076923076929234e+02 4.007478637695312500e+02 -5.315704345703125000e+00 5.088587999343872070e-01 2.941176593303680420e-01 1.321137451171875000e+03 1.270566821098327637e+00 3.000000000000000000e+00 5.450089721679687500e+02 -7.075000000000000000e+01 5.375000000000000000e+01
1.300000000000000000e+01 8.607076923076926960e+02 4.460477600097656250e+02 -5.329864501953125000e+00 4.548865258693695068e-01 6.470588445663452148e-01 1.295079956054687500e+03 1.306883811950683594e+00 1.000000000000000000e+00 5.663750000000000000e+02 -6.975000000000000000e+01 5.375000000000000000e+01
2.600000000000000000e+01 8.684923076923078042e+02 4.640419311523437500e+02 -5.470123291015625000e+00 4.419907033443450928e-01 0.000000000000000000e+00 1.270849365234375000e+03 1.288715124130249023e+00 3.000000000000000000e+00 5.555601806640625000e+02 -6.875000000000000000e+01 5.375000000000000000e+01
3.800000000000000000e+01 9.386461538461537657e+02 4.655053100585937500e+02 -5.578094482421875000e+00 5.513480305671691895e-01 0.000000000000000000e+00 1.259281982421875000e+03 1.241267800331115723e+00 3.000000000000000000e+00 5.872821044921875000e+02 -6.825000000000000000e+01 5.375000000000000000e+01
2.000000000000000000e+01 8.689153846153848235e+02 4.674866027832031250e+02 -5.786041259765625000e+00 5.241319537162780762e-01 0.000000000000000000e+00 1.240408813476562500e+03 1.271195292472839355e+00 3.000000000000000000e+00 6.256788940429687500e+02 -6.725000000000000000e+01 5.375000000000000000e+01
3.200000000000000000e+01 8.679230769230766782e+02 4.671213073730468750e+02 -5.878051757812500000e+00 4.742039442062377930e-01 0.000000000000000000e+00 1.237364379882812500e+03 1.269914865493774414e+00 3.000000000000000000e+00 6.301507568359375000e+02 -6.675000000000000000e+01 5.375000000000000000e+01
2.200000000000000000e+01 8.459769230769231854e+02 4.643175048828125000e+02 -5.970092773437500000e+00 4.197277128696441650e-01 0.000000000000000000e+00 1.234319946289062500e+03 1.272323250770568848e+00 3.000000000000000000e+00 5.054393005371093750e+02 -6.625000000000000000e+01 5.375000000000000000e+01
2.900000000000000000e+01 8.335076923076921958e+02 4.524088134765625000e+02 -6.062103271484375000e+00 4.238702952861785889e-01 0.000000000000000000e+00 1.231275512695312500e+03 1.280392527580261230e+00 3.000000000000000000e+00 4.933794250488281250e+02 -6.575000000000000000e+01 5.375000000000000000e+01
2.300000000000000000e+01 9.020999999999999091e+02 3.960764770507812500e+02 -5.888885498046875000e+00 4.331018328666687012e-01 5.294117927551269531e-01 1.252712402343750000e+03 1.301960945129394531e+00 3.000000000000000000e+00 5.188482055664062500e+02 -6.425000000000000000e+01 5.375000000000000000e+01
3.000000000000000000e+01 9.246307692307697153e+02 3.891031494140625000e+02 -5.511138916015625000e+00 4.103499650955200195e-01 0.000000000000000000e+00 1.278864135742187500e+03 1.008834242820739746e+00 3.000000000000000000e+00 5.106763610839843750e+02 -6.325000000000000000e+01 5.375000000000000000e+01
1.400000000000000000e+01 9.647692307692304894e+02 4.318948974609375000e+02 -4.898376464843750000e+00 4.993884861469268799e-01 0.000000000000000000e+00 1.315023681640625000e+03 1.234178900718688965e+00 1.000000000000000000e+00 6.184483642578125000e+02 -6.225000000000000000e+01 5.375000000000000000e+01
3.500000000000000000e+01 9.473230769230768828e+02 4.893586120605468750e+02 -4.098724365234375000e+00 2.293546348810195923e-01 3.529411852359771729e-01 1.346900024414062500e+03 1.623230576515197754e+00 3.000000000000000000e+00 3.412601013183593750e+02 -6.125000000000000000e+01 5.375000000000000000e+01
6.700000000000000000e+01 9.537692307692304894e+02 5.010015563964843750e+02 -3.642822265625000000e+00 9.999999776482582092e-03 1.176470592617988586e-01 1.361553344726562500e+03 1.668016076087951660e+00 4.000000000000000000e+00 7.714456939697265625e+01 -6.075000000000000000e+01 5.375000000000000000e+01
1.100000000000000000e+01 1.084892307692307895e+03 5.463901977539062500e+02 -1.858245849609375000e+00 2.107421159744262695e-01 0.000000000000000000e+00 1.417902221679687500e+03 1.438909769058227539e+00 1.000000000000000000e+00 6.472888183593750000e+02 -5.875000000000000000e+01 5.375000000000000000e+01
2.000000000000000000e+01 1.105261538461539203e+03 5.669224853515625000e+02 -1.417938232421875000e+00 1.438199579715728760e-01 0.000000000000000000e+00 1.431649902343750000e+03 1.091006398200988770e+00 3.000000000000000000e+00 3.362295837402343750e+02 -5.825000000000000000e+01 5.375000000000000000e+01
5.600000000000000000e+01 1.105769230769230717e+03 5.785851440429687500e+02 -1.081817626953125000e+00 9.999999776482582092e-03 0.000000000000000000e+00 1.396470581054687500e+03 1.450048685073852539e+00 4.000000000000000000e+00 2.019593811035156250e+02 -5.775000000000000000e+01 5.375000000000000000e+01
2.700000000000000000e+01 4.974999999999999432e+02 2.602960205078125000e+02 -2.139709472656250000e+00 9.999999776482582092e-03 0.000000000000000000e+00 2.212203369140625000e+03 2.916991710662841797e+00 3.000000000000000000e+00 2.438747100830078125e+02 -9.925000000000000000e+01 5.425000000000000000e+01
2.400000000000000000e+01 4.904384615384615813e+02 2.791012268066406250e+02 -2.341156005859375000e+00 9.999999776482582092e-03 0.000000000000000000e+00 2.189585693359375000e+03 2.009690284729003906e+00 3.000000000000000000e+00 2.128028411865234375e+02 -9.875000000000000000e+01 5.425000000000000000e+01
4.300000000000000000e+01 5.359153846153845961e+02 2.835663452148437500e+02 -2.952941894531250000e+00 9.999999776482582092e-03 0.000000000000000000e+00 2.120664062500000000e+03 1.988507866859436035e+00 3.000000000000000000e+00 2.268510742187500000e+02 -9.725000000000000000e+01 5.425000000000000000e+01
5.600000000000000000e+01 6.076615384615386120e+02 3.036437377929687500e+02 -3.730407714843750000e+00 1.500986218452453613e-01 0.000000000000000000e+00 2.019473510742187500e+03 1.953529000282287598e+00 4.000000000000000000e+00 2.213763275146484375e+02 -9.525000000000000000e+01 5.425000000000000000e+01
5.700000000000000000e+01 6.226769230769227761e+02 3.120452270507812500e+02 -3.928070068359375000e+00 1.611425578594207764e-01 2.352941185235977173e-01 1.964178222656250000e+03 1.955191969871520996e+00 4.000000000000000000e+00 2.332243194580078125e+02 -9.425000000000000000e+01 5.425000000000000000e+01
4.200000000000000000e+01 6.341076923076924459e+02 3.129905395507812500e+02 -4.026885986328125000e+00 1.847496181726455688e-01 2.352941185235977173e-01 1.936530517578125000e+03 1.935883164405822754e+00 3.000000000000000000e+00 2.205719451904296875e+02 -9.375000000000000000e+01 5.425000000000000000e+01
3.900000000000000000e+01 6.511538461538463025e+02 2.922955932617187500e+02 -4.047576904296875000e+00 2.137682884931564331e-01 2.352941185235977173e-01 1.906064941406250000e+03 1.899713516235351562e+00 3.000000000000000000e+00 2.230618286132812500e+02 -9.275000000000000000e+01 5.425000000000000000e+01
4.100000000000000000e+01 6.509153846153844825e+02 2.674617004394531250e+02 -4.057891845703125000e+00 2.446538060903549194e-01 8.235294222831726074e-01 1.890832153320312500e+03 1.893517613410949707e+00 3.000000000000000000e+00 2.538791046142578125e+02 -9.225000000000000000e+01 5.425000000000000000e+01
4.500000000000000000e+01 6.527153846153845507e+02 2.422962493896484375e+02 -4.074859619140625000e+00 2.353033274412155151e-01 2.941176593303680420e-01 1.874479003906250000e+03 1.889263987541198730e+00 4.000000000000000000e+00 2.282294158935546875e+02 -9.175000000000000000e+01 5.425000000000000000e+01
2.400000000000000000e+01 6.507769230769231399e+02 2.114710693359375000e+02 -4.148468017578125000e+00 2.595403492450714111e-01 0.000000000000000000e+00 1.835050659179687500e+03 1.866635084152221680e+00 3.000000000000000000e+00 2.128008422851562500e+02 -9.075000000000000000e+01 5.425000000000000000e+01
3.700000000000000000e+01 6.401461538461537657e+02 1.835508728027343750e+02 -4.256683349609375000e+00 2.657667696475982666e-01 2.941176593303680420e-01 1.790975708007812500e+03 1.839083194732666016e+00 3.000000000000000000e+00 1.707697601318359375e+02 -8.975000000000000000e+01 5.425000000000000000e+01
1.900000000000000000e+01 6.412846153846154493e+02 1.807470703125000000e+02 -4.362701416015625000e+00 2.717904746532440186e-01 0.000000000000000000e+00 1.761968261718750000e+03 1.830848693847656250e+00 1.000000000000000000e+00 1.511853485107421875e+02 -8.925000000000000000e+01 5.425000000000000000e+01
1.200000000000000000e+01 6.380076923076921958e+02 1.855323791503906250e+02 -4.468688964843750000e+00 2.774412333965301514e-01 0.000000000000000000e+00 1.732960937500000000e+03 1.822305679321289062e+00 1.000000000000000000e+00 1.393016510009765625e+02 -8.875000000000000000e+01 5.425000000000000000e+01
1.700000000000000000e+01 6.377384615384615927e+02 1.923862304687500000e+02 -4.574707031250000000e+00 2.905720472335815430e-01 2.941176593303680420e-01 1.703953613281250000e+03 1.817567944526672363e+00 1.000000000000000000e+00 1.357100982666015625e+02 -8.825000000000000000e+01 5.425000000000000000e+01
3.100000000000000000e+01 6.230538461538460524e+02 2.026292877197265625e+02 -4.660430908203125000e+00 3.058215975761413574e-01 0.000000000000000000e+00 1.677506713867187500e+03 1.816636919975280762e+00 3.000000000000000000e+00 1.466175079345703125e+02 -8.775000000000000000e+01 5.425000000000000000e+01
2.200000000000000000e+01 6.138846153846153584e+02 2.162286987304687500e+02 -4.739440917968750000e+00 2.951112091541290283e-01 0.000000000000000000e+00 1.651913330078125000e+03 1.809648394584655762e+00 3.000000000000000000e+00 1.016369705200195312e+02 -8.725000000000000000e+01 5.425000000000000000e+01
2.700000000000000000e+01 6.010999999999999091e+02 2.383549346923828125e+02 -4.897430419921875000e+00 3.442011773586273193e-01 0.000000000000000000e+00 1.600726684570312500e+03 1.762316584587097168e+00 3.000000000000000000e+00 1.313892364501953125e+02 -8.625000000000000000e+01 5.425000000000000000e+01
3.000000000000000000e+01 5.884153846153847098e+02 2.396045532226562500e+02 -4.852142333984375000e+00 3.564947545528411865e-01 0.000000000000000000e+00 1.590081909179687500e+03 1.714799284934997559e+00 3.000000000000000000e+00 1.085509033203125000e+02 -8.575000000000000000e+01 5.425000000000000000e+01
9.000000000000000000e+00 5.784153846153842551e+02 2.404956054687500000e+02 -4.761596679687500000e+00 3.763749003410339355e-01 0.000000000000000000e+00 1.568792358398437500e+03 1.546361684799194336e+00 1.000000000000000000e+00 1.419202270507812500e+02 -8.475000000000000000e+01 5.425000000000000000e+01
1.400000000000000000e+01 5.503846153846152447e+02 2.439767608642578125e+02 -4.552246093750000000e+00 3.345608413219451904e-01 4.705882370471954346e-01 1.563639160156250000e+03 1.727923035621643066e+00 1.000000000000000000e+00 8.017884826660156250e+01 -8.375000000000000000e+01 5.425000000000000000e+01
2.200000000000000000e+01 5.425000000000002274e+02 2.608096618652343750e+02 -4.411956787109375000e+00 3.334086239337921143e-01 0.000000000000000000e+00 1.565903564453125000e+03 1.712824702262878418e+00 3.000000000000000000e+00 5.259692764282226562e+01 -8.325000000000000000e+01 5.425000000000000000e+01
2.200000000000000000e+01 5.370153846153843915e+02 2.768332519531250000e+02 -4.271667480468750000e+00 3.198998868465423584e-01 5.294117927551269531e-01 1.568167846679687500e+03 1.705320239067077637e+00 3.000000000000000000e+00 1.899999618530273438e+01 -8.275000000000000000e+01 5.425000000000000000e+01
1.900000000000000000e+01 6.330769230769230944e+02 3.814260253906250000e+02 -3.905883789062500000e+00 3.377016484737396240e-01 0.000000000000000000e+00 1.570005737304687500e+03 1.350113272666931152e+00 1.000000000000000000e+00 5.563983535766601562e+01 -7.875000000000000000e+01 5.425000000000000000e+01
6.000000000000000000e+00 6.654461538461539476e+02 3.836597595214843750e+02 -4.109893798828125000e+00 3.891343176364898682e-01 2.352941185235977173e-01 1.547465087890625000e+03 1.329379200935363770e+00 1.000000000000000000e+00 1.415182800292968750e+02 -7.825000000000000000e+01 5.425000000000000000e+01
2.300000000000000000e+01 7.194076923076926278e+02 3.818780822753906250e+02 -4.920013427734375000e+00 3.869039714336395264e-01 0.000000000000000000e+00 1.458927734375000000e+03 1.290428161621093750e+00 3.000000000000000000e+00 1.873245697021484375e+02 -7.625000000000000000e+01 5.425000000000000000e+01
2.300000000000000000e+01 7.396615384615386120e+02 3.774778747558593750e+02 -5.119384765625000000e+00 4.515029489994049072e-01 0.000000000000000000e+00 1.437687377929687500e+03 1.307563185691833496e+00 3.000000000000000000e+00 2.359928588867187500e+02 -7.575000000000000000e+01 5.425000000000000000e+01
1.100000000000000000e+01 7.317153846153848917e+02 3.754393310546875000e+02 -5.318725585937500000e+00 4.427691102027893066e-01 5.294117927551269531e-01 1.416447021484375000e+03 1.345215320587158203e+00 1.000000000000000000e+00 2.643240356445312500e+02 -7.525000000000000000e+01 5.425000000000000000e+01
1.800000000000000000e+01 7.391000000000004775e+02 3.724719543457031250e+02 -5.452484130859375000e+00 5.589933991432189941e-01 0.000000000000000000e+00 1.397982177734375000e+03 1.278072714805603027e+00 1.000000000000000000e+00 4.089580688476562500e+02 -7.475000000000000000e+01 5.425000000000000000e+01
3.100000000000000000e+01 7.665923076923074859e+02 3.750744323730468750e+02 -5.656951904296875000e+00 5.205299258232116699e-01 0.000000000000000000e+00 1.350913330078125000e+03 1.258222460746765137e+00 3.000000000000000000e+00 4.010698547363281250e+02 -7.325000000000000000e+01 5.425000000000000000e+01
2.100000000000000000e+01 7.851692307692303530e+02 3.876260070800781250e+02 -5.610229492187500000e+00 5.380623936653137207e-01 0.000000000000000000e+00 1.321817749023437500e+03 1.150875210762023926e+00 3.000000000000000000e+00 4.385557861328125000e+02 -7.225000000000000000e+01 5.425000000000000000e+01
1.900000000000000000e+01 8.020461538461529472e+02 3.912277832031250000e+02 -5.573822021484375000e+00 5.261896848678588867e-01 0.000000000000000000e+00 1.307432983398437500e+03 1.222773432731628418e+00 1.000000000000000000e+00 4.518924865722656250e+02 -7.175000000000000000e+01 5.425000000000000000e+01
2.100000000000000000e+01 7.865307692307690104e+02 3.956097412109375000e+02 -5.537384033203125000e+00 4.816577732563018799e-01 2.941176593303680420e-01 1.293048339843750000e+03 1.273140311241149902e+00 3.000000000000000000e+00 5.302327880859375000e+02 -7.125000000000000000e+01 5.425000000000000000e+01
4.200000000000000000e+01 8.440153846153848463e+02 4.477452697753906250e+02 -5.775085449218750000e+00 5.399773716926574707e-01 0.000000000000000000e+00 1.223195922851562500e+03 1.274653553962707520e+00 3.000000000000000000e+00 5.678230590820312500e+02 -6.875000000000000000e+01 5.425000000000000000e+01
1.700000000000000000e+01 8.480230769230772694e+02 4.505862121582031250e+02 -6.022521972656250000e+00 5.287954211235046387e-01 0.000000000000000000e+00 1.197774291992187500e+03 1.256821513175964355e+00 1.000000000000000000e+00 5.890216064453125000e+02 -6.775000000000000000e+01 5.425000000000000000e+01
1.000000000000000000e+01 8.389461538461538339e+02 4.513627319335937500e+02 -6.134613037109375000e+00 5.200415849685668945e-01 0.000000000000000000e+00 1.189625366210937500e+03 1.248768806457519531e+00 1.000000000000000000e+00 5.946597900390625000e+02 -6.725000000000000000e+01 5.425000000000000000e+01
2.100000000000000000e+01 8.449076923076924004e+02 4.517698364257812500e+02 -6.235015869140625000e+00 5.770110487937927246e-01 0.000000000000000000e+00 1.186038330078125000e+03 1.242289900779724121e+00 3.000000000000000000e+00 6.234536743164062500e+02 -6.675000000000000000e+01 5.425000000000000000e+01
2.000000000000000000e+01 8.953153846153844597e+02 4.020271301269531250e+02 -5.494659423828125000e+00 4.076239168643951416e-01 0.000000000000000000e+00 1.244936279296875000e+03 1.027272462844848633e+00 3.000000000000000000e+00 4.032789306640625000e+02 -6.275000000000000000e+01 5.425000000000000000e+01
2.100000000000000000e+01 9.144461538461534929e+02 4.544649658203125000e+02 -4.785705566406250000e+00 3.435651063919067383e-01 5.294117927551269531e-01 1.281633422851562500e+03 1.261479139328002930e+00 3.000000000000000000e+00 4.442466430664062500e+02 -6.175000000000000000e+01 5.425000000000000000e+01
1.600000000000000000e+01 9.099384615384612971e+02 4.785343322753906250e+02 -4.300750732421875000e+00 2.808122634887695312e-01 5.882352963089942932e-02 1.295431884765625000e+03 1.281738877296447754e+00 1.000000000000000000e+00 3.925525817871093750e+02 -6.125000000000000000e+01 5.425000000000000000e+01
3.000000000000000000e+01 9.413384615384616154e+02 4.971805419921875000e+02 -3.330780029296875000e+00 2.448061704635620117e-01 7.058823704719543457e-01 1.323028686523437500e+03 1.079971551895141602e+00 3.000000000000000000e+00 3.746789855957031250e+02 -6.025000000000000000e+01 5.425000000000000000e+01
1.100000000000000000e+01 9.564769230769228443e+02 5.065438232421875000e+02 -2.850921630859375000e+00 1.789642274379730225e-01 5.882352963089942932e-02 1.337807006835937500e+03 1.260449886322021484e+00 1.000000000000000000e+00 3.191972351074218750e+02 -5.975000000000000000e+01 5.425000000000000000e+01
2.900000000000000000e+01 9.791923076923075087e+02 5.234578247070312500e+02 -2.376190185546875000e+00 1.386990100145339966e-01 5.882352963089942932e-02 1.353565063476562500e+03 7.157692909240722656e-01 3.000000000000000000e+00 2.673082885742187500e+02 -5.925000000000000000e+01 5.425000000000000000e+01
6.800000000000000000e+01 4.965538461538460524e+02 2.557217864990234375e+02 -2.725311279296875000e+00 9.999999776482582092e-03 0.000000000000000000e+00 2.120430419921875000e+03 1.959447979927062988e+00 4.000000000000000000e+00 2.714523925781250000e+02 -9.975000000000000000e+01 5.475000000000000000e+01
5.100000000000000000e+01 4.999538461538462002e+02 2.722532348632812500e+02 -2.827972412109375000e+00 1.063503324985504150e-01 0.000000000000000000e+00 2.112399658203125000e+03 1.958368182182312012e+00 4.000000000000000000e+00 2.579449157714843750e+02 -9.925000000000000000e+01 5.475000000000000000e+01
5.200000000000000000e+01 4.961538461538461320e+02 2.869280090332031250e+02 -3.032775878906250000e+00 1.015820130705833435e-01 0.000000000000000000e+00 2.090017333984375000e+03 1.971893429756164551e+00 4.000000000000000000e+00 2.256657562255859375e+02 -9.875000000000000000e+01 5.475000000000000000e+01
4.500000000000000000e+01 4.935692307692307281e+02 2.913901977539062500e+02 -3.237579345703125000e+00 1.059533953666687012e-01 0.000000000000000000e+00 2.067635009765625000e+03 1.973253965377807617e+00 4.000000000000000000e+00 2.039223175048828125e+02 -9.825000000000000000e+01 5.475000000000000000e+01
4.500000000000000000e+01 5.104000000000000341e+02 2.915759582519531250e+02 -3.442413330078125000e+00 1.273780614137649536e-01 0.000000000000000000e+00 2.045252807617187500e+03 1.818712234497070312e+00 4.000000000000000000e+00 2.120570983886718750e+02 -9.775000000000000000e+01 5.475000000000000000e+01
3.500000000000000000e+01 5.762076923076923549e+02 2.873374938964843750e+02 -4.024780273437500000e+00 1.847945004701614380e-01 5.882352963089942932e-02 1.979108032226562500e+03 1.910489439964294434e+00 3.000000000000000000e+00 2.155627136230468750e+02 -9.625000000000000000e+01 5.475000000000000000e+01
5.300000000000000000e+01 5.994384615384616382e+02 3.026530761718750000e+02 -4.305847167968750000e+00 2.146117687225341797e-01 2.352941185235977173e-01 1.934240112304687500e+03 1.899930596351623535e+00 4.000000000000000000e+00 2.099505310058593750e+02 -9.525000000000000000e+01 5.475000000000000000e+01
3.800000000000000000e+01 6.275769230769232081e+02 2.904574584960937500e+02 -4.420227050781250000e+00 2.718761265277862549e-01 2.941176593303680420e-01 1.835693969726562500e+03 1.852625131607055664e+00 3.000000000000000000e+00 1.919013824462890625e+02 -9.275000000000000000e+01 5.475000000000000000e+01
3.000000000000000000e+01 6.282000000000000455e+02 2.650011596679687500e+02 -4.395202636718750000e+00 2.803284525871276855e-01 5.294117927551269531e-01 1.821203002929687500e+03 1.841087102890014648e+00 3.000000000000000000e+00 1.844600830078125000e+02 -9.225000000000000000e+01 5.475000000000000000e+01
2.700000000000000000e+01 6.297461538461536747e+02 2.356954345703125000e+02 -4.379974365234375000e+00 2.838465273380279541e-01 8.235294222831726074e-01 1.805160888671875000e+03 1.832625150680541992e+00 3.000000000000000000e+00 1.724613952636718750e+02 -9.175000000000000000e+01 5.475000000000000000e+01
2.300000000000000000e+01 6.292692307692308304e+02 2.143942108154296875e+02 -4.394165039062500000e+00 2.898061573505401611e-01 0.000000000000000000e+00 1.784464965820312500e+03 1.822839498519897461e+00 3.000000000000000000e+00 1.510532073974609375e+02 -9.125000000000000000e+01 5.475000000000000000e+01
4.800000000000000000e+01 6.240692307692305576e+02 2.014320068359375000e+02 -4.408325195312500000e+00 3.011333942413330078e-01 5.882352963089942932e-02 1.763769042968750000e+03 1.813128471374511719e+00 4.000000000000000000e+00 1.458970794677734375e+02 -9.075000000000000000e+01 5.475000000000000000e+01
2.800000000000000000e+01 6.189230769230769056e+02 1.920137176513671875e+02 -4.422485351562500000e+00 3.076564967632293701e-01 2.941176593303680420e-01 1.743073120117187500e+03 1.801219940185546875e+00 3.000000000000000000e+00 1.340041503906250000e+02 -9.025000000000000000e+01 5.475000000000000000e+01
1.300000000000000000e+01 6.157615384615384073e+02 1.864162139892578125e+02 -4.468780517578125000e+00 3.261632919311523438e-01 0.000000000000000000e+00 1.717286865234375000e+03 1.789377450942993164e+00 1.000000000000000000e+00 1.324907531738281250e+02 -8.975000000000000000e+01 5.475000000000000000e+01
1.300000000000000000e+01 6.131153846153846416e+02 1.836169128417968750e+02 -4.547210693359375000e+00 3.436642289161682129e-01 2.352941185235977173e-01 1.686410400390625000e+03 1.780080080032348633e+00 1.000000000000000000e+00 1.339027709960937500e+02 -8.925000000000000000e+01 5.475000000000000000e+01
6.000000000000000000e+00 6.144076923076924004e+02 1.852832031250000000e+02 -4.625640869140625000e+00 3.562365472316741943e-01 0.000000000000000000e+00 1.655533935546875000e+03 1.770111680030822754e+00 1.000000000000000000e+00 1.359491577148437500e+02 -8.875000000000000000e+01 5.475000000000000000e+01
1.100000000000000000e+01 6.048692307692306258e+02 1.930448913574218750e+02 -4.704071044921875000e+00 3.695424795150756836e-01 2.352941185235977173e-01 1.624657470703125000e+03 1.763800740242004395e+00 1.000000000000000000e+00 1.291354980468750000e+02 -8.825000000000000000e+01 5.475000000000000000e+01
3.000000000000000000e+01 6.002999999999999545e+02 2.069662628173828125e+02 -4.852905273437500000e+00 3.637406826019287109e-01 5.294117927551269531e-01 1.572074951171875000e+03 1.696590065956115723e+00 3.000000000000000000e+00 1.081794509887695312e+02 -8.775000000000000000e+01 5.475000000000000000e+01
2.600000000000000000e+01 5.915076923076926505e+02 2.195169982910156250e+02 -5.025207519531250000e+00 3.782308995723724365e-01 0.000000000000000000e+00 1.512257080078125000e+03 1.579684972763061523e+00 3.000000000000000000e+00 1.004575805664062500e+02 -8.725000000000000000e+01 5.475000000000000000e+01
1.500000000000000000e+01 5.814153846153847098e+02 2.318587646484375000e+02 -5.369812011718750000e+00 4.051214158535003662e-01 5.294117927551269531e-01 1.392621459960937500e+03 1.589738607406616211e+00 1.000000000000000000e+00 9.332744598388671875e+01 -8.625000000000000000e+01 5.475000000000000000e+01
1.100000000000000000e+01 5.588846153846153584e+02 2.345404663085937500e+02 -5.280700683593750000e+00 4.448732435703277588e-01 0.000000000000000000e+00 1.366782470703125000e+03 1.392198324203491211e+00 1.000000000000000000e+00 1.100313796997070312e+02 -8.475000000000000000e+01 5.475000000000000000e+01
1.900000000000000000e+01 5.492923076923075314e+02 2.389806518554687500e+02 -5.225860595703125000e+00 4.381286203861236572e-01 0.000000000000000000e+00 1.361501953125000000e+03 1.380286931991577148e+00 1.000000000000000000e+00 7.484780883789062500e+01 -8.425000000000000000e+01 5.475000000000000000e+01
1.600000000000000000e+01 5.404538461538465981e+02 2.529679565429687500e+02 -5.095581054687500000e+00 4.074897766113281250e-01 2.941176593303680420e-01 1.366218994140625000e+03 1.378211975097656250e+00 1.000000000000000000e+00 5.017396926879882812e+01 -8.375000000000000000e+01 5.475000000000000000e+01
1.400000000000000000e+01 5.317076923076924686e+02 2.753724365234375000e+02 -4.965301513671875000e+00 4.033328592777252197e-01 0.000000000000000000e+00 1.370935913085937500e+03 1.373259782791137695e+00 1.000000000000000000e+00 3.877664566040039062e+01 -8.325000000000000000e+01 5.475000000000000000e+01
3.600000000000000000e+01 5.266153846153846416e+02 2.874617309570312500e+02 -4.835052490234375000e+00 3.949807286262512207e-01 0.000000000000000000e+00 1.375652832031250000e+03 1.365926980972290039e+00 3.000000000000000000e+00 1.766699218750000000e+01 -8.275000000000000000e+01 5.475000000000000000e+01
1.600000000000000000e+01 6.958999999999997499e+02 3.771864013671875000e+02 -4.988983154296875000e+00 4.883525669574737549e-01 0.000000000000000000e+00 1.333418212890625000e+03 1.244656443595886230e+00 1.000000000000000000e+00 1.921137237548828125e+02 -7.725000000000000000e+01 5.475000000000000000e+01
2.800000000000000000e+01 7.028076923076920366e+02 3.783524780273437500e+02 -5.156402587890625000e+00 5.147644877433776855e-01 0.000000000000000000e+00 1.321368530273437500e+03 1.236187934875488281e+00 3.000000000000000000e+00 2.537943572998046875e+02 -7.675000000000000000e+01 5.475000000000000000e+01
2.300000000000000000e+01 7.028384615384615017e+02 3.772299499511718750e+02 -5.294067382812500000e+00 5.401811599731445312e-01 0.000000000000000000e+00 1.331898803710937500e+03 1.231288433074951172e+00 3.000000000000000000e+00 2.794515380859375000e+02 -7.625000000000000000e+01 5.475000000000000000e+01
2.400000000000000000e+01 7.216923076923077360e+02 3.750713195800781250e+02 -5.431732177734375000e+00 5.630126595497131348e-01 0.000000000000000000e+00 1.342428955078125000e+03 1.223887920379638672e+00 3.000000000000000000e+00 3.402325134277343750e+02 -7.575000000000000000e+01 5.475000000000000000e+01
6.000000000000000000e+00 7.215538461538460524e+02 3.735274353027343750e+02 -5.673522949218750000e+00 5.568256378173828125e-01 0.000000000000000000e+00 1.352155639648437500e+03 1.229192256927490234e+00 1.000000000000000000e+00 3.788477478027343750e+02 -7.475000000000000000e+01 5.475000000000000000e+01
1.700000000000000000e+01 7.351769230769233445e+02 3.701901550292968750e+02 -5.744079589843750000e+00 5.989661216735839844e-01 0.000000000000000000e+00 1.340018432617187500e+03 1.224604964256286621e+00 1.000000000000000000e+00 3.623228454589843750e+02 -7.425000000000000000e+01 5.475000000000000000e+01
2.000000000000000000e+01 7.450615384615383618e+02 3.689439086914062500e+02 -5.814666748046875000e+00 5.936686992645263672e-01 0.000000000000000000e+00 1.327881225585937500e+03 1.210425615310668945e+00 3.000000000000000000e+00 3.893669433593750000e+02 -7.375000000000000000e+01 5.475000000000000000e+01
1.200000000000000000e+01 7.492538461538460979e+02 3.690603942871093750e+02 -5.885223388671875000e+00 5.930857658386230469e-01 0.000000000000000000e+00 1.315744018554687500e+03 1.103667259216308594e+00 1.000000000000000000e+00 4.021051635742187500e+02 -7.325000000000000000e+01 5.475000000000000000e+01
2.800000000000000000e+01 7.623692307692308532e+02 3.819386901855468750e+02 -5.863006591796875000e+00 5.899696946144104004e-01 5.882353186607360840e-01 1.289793579101562500e+03 1.221166014671325684e+00 3.000000000000000000e+00 4.376013793945312500e+02 -7.225000000000000000e+01 5.475000000000000000e+01
2.700000000000000000e+01 7.647384615384619337e+02 3.922948913574218750e+02 -5.817474365234375000e+00 5.354970693588256836e-01 0.000000000000000000e+00 1.263603759765625000e+03 1.233731508255004883e+00 3.000000000000000000e+00 4.744165344238281250e+02 -7.125000000000000000e+01 5.475000000000000000e+01
1.700000000000000000e+01 8.122923076923070766e+02 4.395045166015625000e+02 -6.157104492187500000e+00 5.671430230140686035e-01 0.000000000000000000e+00 1.181498168945312500e+03 1.247309088706970215e+00 1.000000000000000000e+00 5.900407104492187500e+02 -6.825000000000000000e+01 5.475000000000000000e+01
2.400000000000000000e+01 8.140538461538458250e+02 4.400795898437500000e+02 -6.263458251953125000e+00 5.685336589813232422e-01 0.000000000000000000e+00 1.168440185546875000e+03 1.235217452049255371e+00 3.000000000000000000e+00 5.607415161132812500e+02 -6.775000000000000000e+01 5.475000000000000000e+01
8.000000000000000000e+00 8.297153846153846644e+02 4.397661437988281250e+02 -6.349151611328125000e+00 6.320198774337768555e-01 0.000000000000000000e+00 1.159468261718750000e+03 1.213451743125915527e+00 1.000000000000000000e+00 6.610838012695312500e+02 -6.725000000000000000e+01 5.475000000000000000e+01
3.300000000000000000e+01 8.226923076923079634e+02 4.444443664550781250e+02 -6.479339599609375000e+00 5.630550980567932129e-01 0.000000000000000000e+00 1.149696655273437500e+03 1.127340555191040039e+00 3.000000000000000000e+00 4.919622802734375000e+02 -6.625000000000000000e+01 5.475000000000000000e+01
2.900000000000000000e+01 8.221923076923075087e+02 4.417311401367187500e+02 -6.544433593750000000e+00 5.786459445953369141e-01 0.000000000000000000e+00 1.144810913085937500e+03 1.200060248374938965e+00 3.000000000000000000e+00 5.205924072265625000e+02 -6.575000000000000000e+01 5.475000000000000000e+01
2.400000000000000000e+01 8.205923076923071449e+02 4.342765808105468750e+02 -6.486267089843750000e+00 5.536118149757385254e-01 0.000000000000000000e+00 1.145605712890625000e+03 1.201384067535400391e+00 3.000000000000000000e+00 4.775017089843750000e+02 -6.525000000000000000e+01 5.475000000000000000e+01
1.900000000000000000e+01 8.381923076923083045e+02 4.132656860351562500e+02 -6.287750244140625000e+00 5.763943195343017578e-01 2.352941185235977173e-01 1.150982543945312500e+03 9.723548889160156250e-01 1.000000000000000000e+00 5.497208862304687500e+02 -6.425000000000000000e+01 5.475000000000000000e+01
1.200000000000000000e+01 8.345769230769229807e+02 3.985198059082031250e+02 -5.802734375000000000e+00 5.765643715858459473e-01 0.000000000000000000e+00 1.177593994140625000e+03 1.185336112976074219e+00 1.000000000000000000e+00 5.493787841796875000e+02 -6.325000000000000000e+01 5.475000000000000000e+01
1.700000000000000000e+01 8.443076923076920366e+02 4.024212036132812500e+02 -5.416961669921875000e+00 4.497916400432586670e-01 0.000000000000000000e+00 1.201516845703125000e+03 1.161587834358215332e+00 1.000000000000000000e+00 3.833635253906250000e+02 -6.275000000000000000e+01 5.475000000000000000e+01
8.000000000000000000e+00 8.622153846153846644e+02 4.145307617187500000e+02 -5.031219482421875000e+00 5.393349528312683105e-01 0.000000000000000000e+00 1.225439819335937500e+03 1.120435833930969238e+00 1.000000000000000000e+00 5.553965454101562500e+02 -6.225000000000000000e+01 5.475000000000000000e+01
7.000000000000000000e+00 8.838153846153844597e+02 4.307326049804687500e+02 -4.632354736328125000e+00 5.828586220741271973e-01 5.882352963089942932e-02 1.239623535156250000e+03 1.208190202713012695e+00 1.000000000000000000e+00 5.448877563476562500e+02 -6.175000000000000000e+01 5.475000000000000000e+01
5.200000000000000000e+01 8.786999999999997044e+02 4.454418029785156250e+02 -4.194274902343750000e+00 2.543426454067230225e-01 0.000000000000000000e+00 1.224589477539062500e+03 1.236153364181518555e+00 4.000000000000000000e+00 2.908436279296875000e+02 -6.125000000000000000e+01 5.475000000000000000e+01
2.900000000000000000e+01 8.857000000000005002e+02 4.546226196289062500e+02 -3.756195068359375000e+00 1.838919818401336670e-01 0.000000000000000000e+00 1.209555419921875000e+03 1.114781260490417480e+00 3.000000000000000000e+00 1.373125305175781250e+02 -6.075000000000000000e+01 5.475000000000000000e+01
3.000000000000000000e+01 8.951153846153840732e+02 4.628242492675781250e+02 -3.318084716796875000e+00 1.658542305231094360e-01 0.000000000000000000e+00 1.194521362304687500e+03 6.129660606384277344e-01 3.000000000000000000e+00 1.505392150878906250e+02 -6.025000000000000000e+01 5.475000000000000000e+01
2.800000000000000000e+01 9.084538461538461434e+02 4.750381774902343750e+02 -2.840240478515625000e+00 1.400392055511474609e-01 0.000000000000000000e+00 1.199866333007812500e+03 9.363127350807189941e-01 3.000000000000000000e+00 1.215829772949218750e+02 -5.975000000000000000e+01 5.475000000000000000e+01
2.000000000000000000e+01 9.278692307692302847e+02 4.951946105957031250e+02 -2.322662353515625000e+00 1.093120574951171875e-01 5.882352963089942932e-02 1.225590454101562500e+03 6.579532623291015625e-01 3.000000000000000000e+00 1.191736984252929688e+02 -5.925000000000000000e+01 5.475000000000000000e+01
4.200000000000000000e+01 5.050307692307691809e+02 2.610665893554687500e+02 -3.409301757812500000e+00 1.491190940141677856e-01 0.000000000000000000e+00 2.020283935546875000e+03 1.915284276008605957e+00 3.000000000000000000e+00 3.082076110839843750e+02 -9.975000000000000000e+01 5.525000000000000000e+01
4.300000000000000000e+01 5.111230769230770079e+02 2.754826049804687500e+02 -3.531982421875000000e+00 1.611028909683227539e-01 0.000000000000000000e+00 2.010561157226562500e+03 1.905774831771850586e+00 3.000000000000000000e+00 2.834948120117187500e+02 -9.925000000000000000e+01 5.525000000000000000e+01
2.900000000000000000e+01 5.159230769230769056e+02 2.832043151855468750e+02 -3.737670898437500000e+00 1.712922155857086182e-01 0.000000000000000000e+00 1.988904907226562500e+03 1.900099515914916992e+00 3.000000000000000000e+00 2.542550659179687500e+02 -9.875000000000000000e+01 5.525000000000000000e+01
6.700000000000000000e+01 5.241384615384615699e+02 2.862761535644531250e+02 -3.943359375000000000e+00 1.789712458848953247e-01 0.000000000000000000e+00 1.967248535156250000e+03 1.708469629287719727e+00 4.000000000000000000e+00 2.152008361816406250e+02 -9.825000000000000000e+01 5.525000000000000000e+01
4.500000000000000000e+01 5.684230769230769056e+02 2.828119812011718750e+02 -4.501708984375000000e+00 2.451198101043701172e-01 0.000000000000000000e+00 1.905629882812500000e+03 1.863451361656188965e+00 4.000000000000000000e+00 2.325866241455078125e+02 -9.675000000000000000e+01 5.525000000000000000e+01
3.900000000000000000e+01 5.759384615384614108e+02 2.829960632324218750e+02 -4.668273925781250000e+00 2.569814920425415039e-01 0.000000000000000000e+00 1.886207153320312500e+03 1.855453252792358398e+00 3.000000000000000000e+00 2.146466217041015625e+02 -9.625000000000000000e+01 5.525000000000000000e+01
3.900000000000000000e+01 5.783230769230768828e+02 2.918660278320312500e+02 -4.883087158203125000e+00 2.783021628856658936e-01 4.705882370471954346e-01 1.848062744140625000e+03 1.871122956275939941e+00 3.000000000000000000e+00 2.013363647460937500e+02 -9.525000000000000000e+01 5.525000000000000000e+01
3.500000000000000000e+01 5.891692307692309214e+02 2.932182006835937500e+02 -4.891906738281250000e+00 2.910185754299163818e-01 4.705882370471954346e-01 1.829574951171875000e+03 1.862908005714416504e+00 3.000000000000000000e+00 1.930976104736328125e+02 -9.475000000000000000e+01 5.525000000000000000e+01
3.700000000000000000e+01 5.963769230769229353e+02 2.951044311523437500e+02 -4.900726318359375000e+00 2.925049066543579102e-01 4.705882370471954346e-01 1.811087158203125000e+03 1.853841662406921387e+00 3.000000000000000000e+00 1.775415954589843750e+02 -9.425000000000000000e+01 5.525000000000000000e+01
2.500000000000000000e+01 6.046000000000001364e+02 2.945055236816406250e+02 -4.848602294921875000e+00 3.084233105182647705e-01 5.294117927551269531e-01 1.778634155273437500e+03 1.824800610542297363e+00 3.000000000000000000e+00 1.511336212158203125e+02 -9.325000000000000000e+01 5.525000000000000000e+01
2.500000000000000000e+01 5.991999999999999318e+02 2.865671997070312500e+02 -4.787658691406250000e+00 3.182201087474822998e-01 6.470588445663452148e-01 1.764668945312500000e+03 1.812793254852294922e+00 3.000000000000000000e+00 1.457088470458984375e+02 -9.275000000000000000e+01 5.525000000000000000e+01
2.700000000000000000e+01 6.009538461538462570e+02 2.697557678222656250e+02 -4.726684570312500000e+00 3.283535838127136230e-01 7.647058963775634766e-01 1.750703735351562500e+03 1.806486964225769043e+00 3.000000000000000000e+00 1.307094726562500000e+02 -9.225000000000000000e+01 5.525000000000000000e+01
2.700000000000000000e+01 5.939307692307693287e+02 2.383756103515625000e+02 -4.678802490234375000e+00 3.104485273361206055e-01 7.647058963775634766e-01 1.734779663085937500e+03 1.809496521949768066e+00 3.000000000000000000e+00 1.135546493530273438e+02 -9.175000000000000000e+01 5.525000000000000000e+01
2.800000000000000000e+01 5.924153846153845961e+02 2.145203094482421875e+02 -4.670135498046875000e+00 3.193685114383697510e-01 2.941176593303680420e-01 1.712979003906250000e+03 1.799238443374633789e+00 3.000000000000000000e+00 1.085257186889648438e+02 -9.125000000000000000e+01 5.525000000000000000e+01
1.700000000000000000e+01 6.003999999999998636e+02 1.984737091064453125e+02 -4.661437988281250000e+00 3.624574244022369385e-01 0.000000000000000000e+00 1.691178344726562500e+03 1.774159669876098633e+00 1.000000000000000000e+00 1.204354782104492188e+02 -9.075000000000000000e+01 5.525000000000000000e+01
1.000000000000000000e+01 5.931923076923075087e+02 1.902228546142578125e+02 -4.652770996093750000e+00 3.697139024734497070e-01 2.941176593303680420e-01 1.669377685546875000e+03 1.752760052680969238e+00 1.000000000000000000e+00 1.158271713256835938e+02 -9.025000000000000000e+01 5.525000000000000000e+01
2.500000000000000000e+01 5.912307692307690559e+02 1.870912017822265625e+02 -4.673065185546875000e+00 4.025259613990783691e-01 0.000000000000000000e+00 1.642125610351562500e+03 1.735814452171325684e+00 3.000000000000000000e+00 1.162058410644531250e+02 -8.975000000000000000e+01 5.525000000000000000e+01
2.300000000000000000e+01 5.924769230769232990e+02 1.870961761474609375e+02 -4.722320556640625000e+00 4.141679108142852783e-01 2.352941185235977173e-01 1.609422119140625000e+03 1.664860725402832031e+00 3.000000000000000000e+00 1.199540328979492188e+02 -8.925000000000000000e+01 5.525000000000000000e+01
3.400000000000000000e+01 5.788999999999999773e+02 2.000064392089843750e+02 -4.820861816406250000e+00 4.290911853313446045e-01 5.294117927551269531e-01 1.544015258789062500e+03 1.404875755310058594e+00 3.000000000000000000e+00 8.095977020263671875e+01 -8.825000000000000000e+01 5.525000000000000000e+01
1.000000000000000000e+01 5.847923076923076451e+02 2.111871185302734375e+02 -5.037353515625000000e+00 4.804198443889617920e-01 0.000000000000000000e+00 1.463620971679687500e+03 1.386557340621948242e+00 1.000000000000000000e+00 1.134973220825195312e+02 -8.775000000000000000e+01 5.525000000000000000e+01
1.200000000000000000e+01 5.693461538461538112e+02 2.273164520263671875e+02 -5.854064941406250000e+00 4.997662305831909180e-01 0.000000000000000000e+00 1.174747192382812500e+03 1.367695093154907227e+00 1.000000000000000000e+00 7.914701843261718750e+01 -8.625000000000000000e+01 5.525000000000000000e+01
1.800000000000000000e+01 5.427461538461537884e+02 2.272789916992187500e+02 -5.840393066406250000e+00 4.518590569496154785e-01 0.000000000000000000e+00 1.168618530273437500e+03 1.384732961654663086e+00 1.000000000000000000e+00 3.813983154296875000e+01 -8.575000000000000000e+01 5.525000000000000000e+01
2.100000000000000000e+01 6.911307692307685784e+02 3.734454040527343750e+02 -5.469177246093750000e+00 5.833627581596374512e-01 0.000000000000000000e+00 1.157829589843750000e+03 1.181763291358947754e+00 3.000000000000000000e+00 1.567905731201171875e+02 -7.725000000000000000e+01 5.525000000000000000e+01
2.000000000000000000e+01 6.954769230769228443e+02 3.741561889648437500e+02 -5.600067138671875000e+00 6.000324487686157227e-01 0.000000000000000000e+00 1.156242431640625000e+03 1.144980192184448242e+00 3.000000000000000000e+00 1.986261444091796875e+02 -7.675000000000000000e+01 5.525000000000000000e+01
3.000000000000000000e+01 6.989307692307688740e+02 3.743131713867187500e+02 -5.745758056640625000e+00 6.189165711402893066e-01 0.000000000000000000e+00 1.244768066406250000e+03 1.180152535438537598e+00 3.000000000000000000e+00 2.847834167480468750e+02 -7.575000000000000000e+01 5.525000000000000000e+01
1.600000000000000000e+01 7.069769230769229580e+02 3.724722290039062500e+02 -5.818603515625000000e+00 6.099654436111450195e-01 0.000000000000000000e+00 1.289030883789062500e+03 1.174552202224731445e+00 1.000000000000000000e+00 3.113682250976562500e+02 -7.525000000000000000e+01 5.525000000000000000e+01
3.600000000000000000e+01 7.150999999999999091e+02 3.723910522460937500e+02 -5.892059326171875000e+00 6.347454786300659180e-01 0.000000000000000000e+00 1.306889404296875000e+03 1.173542737960815430e+00 3.000000000000000000e+00 3.419106140136718750e+02 -7.475000000000000000e+01 5.525000000000000000e+01
1.200000000000000000e+01 7.176076923076923322e+02 3.695332031250000000e+02 -5.966094970703125000e+00 6.250486373901367188e-01 0.000000000000000000e+00 1.298343505859375000e+03 1.174491167068481445e+00 1.000000000000000000e+00 3.726172180175781250e+02 -7.425000000000000000e+01 5.525000000000000000e+01
2.800000000000000000e+01 7.309846153846154948e+02 3.675378417968750000e+02 -6.114166259765625000e+00 6.298828721046447754e-01 0.000000000000000000e+00 1.281251708984375000e+03 1.103930711746215820e+00 3.000000000000000000e+00 4.155745849609375000e+02 -7.325000000000000000e+01 5.525000000000000000e+01
1.400000000000000000e+01 7.425538461538459387e+02 3.733916015625000000e+02 -6.118072509765625000e+00 5.971797704696655273e-01 2.352941185235977173e-01 1.258540771484375000e+03 9.396340847015380859e-01 1.000000000000000000e+00 4.019642333984375000e+02 -7.225000000000000000e+01 5.525000000000000000e+01
2.500000000000000000e+01 7.872153846153843233e+02 4.131106262207031250e+02 -6.162628173828125000e+00 6.393196582794189453e-01 2.352941185235977173e-01 1.207819458007812500e+03 1.181444048881530762e+00 3.000000000000000000e+00 4.519222106933593750e+02 -7.025000000000000000e+01 5.525000000000000000e+01
1.800000000000000000e+01 8.038307692307691923e+02 4.235393981933593750e+02 -6.193267822265625000e+00 6.854236721992492676e-01 0.000000000000000000e+00 1.194215576171875000e+03 1.170737147331237793e+00 1.000000000000000000e+00 5.444483032226562500e+02 -6.975000000000000000e+01 5.525000000000000000e+01
3.100000000000000000e+01 8.097846153846154493e+02 4.297574157714843750e+02 -6.237854003906250000e+00 7.166505455970764160e-01 0.000000000000000000e+00 1.180676147460937500e+03 7.030095458030700684e-01 3.000000000000000000e+00 5.427692871093750000e+02 -6.925000000000000000e+01 5.525000000000000000e+01
1.200000000000000000e+01 8.065000000000001137e+02 4.331910705566406250e+02 -6.324310302734375000e+00 6.717769503593444824e-01 0.000000000000000000e+00 1.167330078125000000e+03 1.190155267715454102e+00 1.000000000000000000e+00 5.353725585937500000e+02 -6.875000000000000000e+01 5.525000000000000000e+01
6.000000000000000000e+00 7.990692307692305576e+02 4.356381835937500000e+02 -6.410766601562500000e+00 5.784978270530700684e-01 0.000000000000000000e+00 1.153984008789062500e+03 1.195776820182800293e+00 1.000000000000000000e+00 4.537858886718750000e+02 -6.825000000000000000e+01 5.525000000000000000e+01
1.500000000000000000e+01 8.147769230769227988e+02 4.371685180664062500e+02 -6.497253417968750000e+00 6.352759599685668945e-01 0.000000000000000000e+00 1.140637939453125000e+03 1.032372713088989258e+00 1.000000000000000000e+00 4.776534118652343750e+02 -6.775000000000000000e+01 5.525000000000000000e+01
2.900000000000000000e+01 8.045307692307692378e+02 4.389049072265625000e+02 -6.553741455078125000e+00 6.089673042297363281e-01 0.000000000000000000e+00 1.130844604492187500e+03 1.192225098609924316e+00 3.000000000000000000e+00 4.953437805175781250e+02 -6.725000000000000000e+01 5.525000000000000000e+01
2.100000000000000000e+01 7.958615384615387711e+02 4.417765808105468750e+02 -6.580261230468750000e+00 6.617713570594787598e-01 0.000000000000000000e+00 1.124603881835937500e+03 6.415815949440002441e-01 3.000000000000000000e+00 5.581866455078125000e+02 -6.675000000000000000e+01 5.525000000000000000e+01
8.000000000000000000e+00 7.920692307692308987e+02 4.438839111328125000e+02 -6.606781005859375000e+00 7.247003316879272461e-01 0.000000000000000000e+00 1.118363281250000000e+03 1.152827382087707520e+00 1.000000000000000000e+00 6.519368286132812500e+02 -6.625000000000000000e+01 5.525000000000000000e+01
5.000000000000000000e+00 7.846153846153846416e+02 4.423854675292968750e+02 -6.633331298828125000e+00 6.345753669738769531e-01 0.000000000000000000e+00 1.112122558593750000e+03 8.326793909072875977e-01 1.000000000000000000e+00 5.601179199218750000e+02 -6.575000000000000000e+01 5.525000000000000000e+01
1.700000000000000000e+01 7.895923076923074859e+02 4.381982116699218750e+02 -6.549255371093750000e+00 5.726712346076965332e-01 0.000000000000000000e+00 1.108539184570312500e+03 6.371788978576660156e-01 1.000000000000000000e+00 4.421655578613281250e+02 -6.525000000000000000e+01 5.525000000000000000e+01
1.100000000000000000e+01 7.968153846153848008e+02 4.326024169921875000e+02 -6.428314208984375000e+00 6.217784285545349121e-01 0.000000000000000000e+00 1.105841430664062500e+03 1.124921202659606934e+00 1.000000000000000000e+00 4.987153015136718750e+02 -6.475000000000000000e+01 5.525000000000000000e+01
1.800000000000000000e+01 7.952076923076923549e+02 4.146365661621093750e+02 -6.186462402343750000e+00 6.387908458709716797e-01 0.000000000000000000e+00 1.100446044921875000e+03 1.124638557434082031e+00 1.000000000000000000e+00 5.170726928710937500e+02 -6.375000000000000000e+01 5.525000000000000000e+01
6.000000000000000000e+00 8.149153846153848235e+02 4.133562622070312500e+02 -5.311981201171875000e+00 7.219710946083068848e-01 0.000000000000000000e+00 1.158735961914062500e+03 9.731848239898681641e-01 1.000000000000000000e+00 6.268753051757812500e+02 -6.275000000000000000e+01 5.525000000000000000e+01
4.000000000000000000e+00 8.542538461538465526e+02 4.189719543457031250e+02 -4.874755859375000000e+00 5.667232871055603027e-01 0.000000000000000000e+00 1.187880981445312500e+03 1.027027368545532227e+00 1.000000000000000000e+00 5.823677368164062500e+02 -6.225000000000000000e+01 5.525000000000000000e+01
1.200000000000000000e+01 8.666153846153847553e+02 4.224056091308593750e+02 -4.450439453125000000e+00 4.104521870613098145e-01 2.352941185235977173e-01 1.198253051757812500e+03 1.140727043151855469e+00 1.000000000000000000e+00 3.780148620605468750e+02 -6.175000000000000000e+01 5.525000000000000000e+01
1.500000000000000000e+01 8.641923076923073950e+02 4.253778686523437500e+02 -4.064880371093750000e+00 2.336391061544418335e-01 5.882352963089942932e-02 1.152306640625000000e+03 1.175015330314636230e+00 1.000000000000000000e+00 1.425700378417968750e+02 -6.125000000000000000e+01 5.525000000000000000e+01
2.800000000000000000e+01 5.014076923076922299e+02 2.745179443359375000e+02 -4.093322753906250000e+00 1.885353624820709229e-01 5.882352963089942932e-02 1.920137329101562500e+03 1.686381578445434570e+00 3.000000000000000000e+00 3.135720214843750000e+02 -9.975000000000000000e+01 5.575000000000000000e+01
5.200000000000000000e+01 5.042692307692306031e+02 2.802334899902343750e+02 -4.235992431640625000e+00 1.982166618108749390e-01 0.000000000000000000e+00 1.908722778320312500e+03 1.875838041305541992e+00 4.000000000000000000e+00 2.640777282714843750e+02 -9.925000000000000000e+01 5.575000000000000000e+01
5.800000000000000000e+01 5.454461538461539476e+02 2.832987976074218750e+02 -4.649108886718750000e+00 2.723141610622406006e-01 0.000000000000000000e+00 1.866862060546875000e+03 1.838737249374389648e+00 4.000000000000000000e+00 2.645237426757812500e+02 -9.825000000000000000e+01 5.575000000000000000e+01
6.000000000000000000e+01 5.597230769230768601e+02 2.837608032226562500e+02 -4.855651855468750000e+00 2.679323852062225342e-01 5.882353186607360840e-01 1.845931640625000000e+03 1.837179303169250488e+00 4.000000000000000000e+00 2.084330596923828125e+02 -9.775000000000000000e+01 5.575000000000000000e+01
2.500000000000000000e+01 5.746615384615383846e+02 2.817546997070312500e+02 -5.460327148437500000e+00 3.432649970054626465e-01 0.000000000000000000e+00 1.761885498046875000e+03 1.813308715820312500e+00 3.000000000000000000e+00 1.816446075439453125e+02 -9.525000000000000000e+01 5.575000000000000000e+01
3.000000000000000000e+01 5.799384615384616382e+02 2.834789733886718750e+02 -5.423187255859375000e+00 3.554207682609558105e-01 9.411764740943908691e-01 1.748097900390625000e+03 1.807732343673706055e+00 3.000000000000000000e+00 1.646082611083984375e+02 -9.475000000000000000e+01 5.575000000000000000e+01
3.800000000000000000e+01 5.842615384615385210e+02 2.851843261718750000e+02 -5.386016845703125000e+00 3.552935123443603516e-01 3.529411852359771729e-01 1.734310302734375000e+03 1.796091198921203613e+00 3.000000000000000000e+00 1.399097290039062500e+02 -9.425000000000000000e+01 5.575000000000000000e+01
2.400000000000000000e+01 5.885692307692305576e+02 2.857404174804687500e+02 -5.348876953125000000e+00 3.798255920410156250e-01 0.000000000000000000e+00 1.720522705078125000e+03 1.782480478286743164e+00 3.000000000000000000e+00 1.376401519775390625e+02 -9.375000000000000000e+01 5.575000000000000000e+01
2.300000000000000000e+01 5.833769230769230489e+02 2.794595642089843750e+02 -5.155090332031250000e+00 4.073222279548645020e-01 8.235294222831726074e-01 1.693643920898437500e+03 1.761623263359069824e+00 3.000000000000000000e+00 1.535318603515625000e+02 -9.275000000000000000e+01 5.575000000000000000e+01
2.700000000000000000e+01 5.795307692307692378e+02 2.698967895507812500e+02 -5.058197021484375000e+00 3.904356956481933594e-01 2.941176593303680420e-01 1.680204467773437500e+03 1.757757663726806641e+00 3.000000000000000000e+00 1.016461410522460938e+02 -9.225000000000000000e+01 5.575000000000000000e+01
1.500000000000000000e+01 5.702846153846154493e+02 2.527243804931640625e+02 -4.977630615234375000e+00 3.953254222869873047e-01 4.705882370471954346e-01 1.664398559570312500e+03 1.758490920066833496e+00 1.000000000000000000e+00 1.252483673095703125e+02 -9.175000000000000000e+01 5.575000000000000000e+01
2.300000000000000000e+01 5.676384615384615699e+02 2.314755096435546875e+02 -4.946105957031250000e+00 4.193802475929260254e-01 0.000000000000000000e+00 1.641493164062500000e+03 1.744224548339843750e+00 3.000000000000000000e+00 1.323394165039062500e+02 -9.125000000000000000e+01 5.575000000000000000e+01
1.800000000000000000e+01 5.794923076923076906e+02 2.095649871826171875e+02 -4.914581298828125000e+00 4.518175125122070312e-01 0.000000000000000000e+00 1.618587646484375000e+03 1.614781618118286133e+00 1.000000000000000000e+00 1.411889038085937500e+02 -9.075000000000000000e+01 5.575000000000000000e+01
1.600000000000000000e+01 5.792000000000000455e+02 1.932440490722656250e+02 -4.883026123046875000e+00 4.659858942031860352e-01 5.294117927551269531e-01 1.595682128906250000e+03 1.562511324882507324e+00 1.000000000000000000e+00 1.427830505371093750e+02 -9.025000000000000000e+01 5.575000000000000000e+01
1.800000000000000000e+01 5.742923076923078725e+02 1.867407073974609375e+02 -4.877319335937500000e+00 4.960607886314392090e-01 5.294117927551269531e-01 1.566964233398437500e+03 1.416402697563171387e+00 1.000000000000000000e+00 1.532933654785156250e+02 -8.975000000000000000e+01 5.575000000000000000e+01
2.000000000000000000e+01 5.715923076923077133e+02 1.899208831787109375e+02 -4.897430419921875000e+00 5.101683139801025391e-01 5.882352963089942932e-02 1.532433837890625000e+03 1.377500534057617188e+00 3.000000000000000000e+00 1.354503631591796875e+02 -8.925000000000000000e+01 5.575000000000000000e+01
2.500000000000000000e+01 5.676230769230770647e+02 2.120560913085937500e+02 -5.221801757812500000e+00 5.196976661682128906e-01 2.352941185235977173e-01 1.355166992187500000e+03 1.348268628120422363e+00 3.000000000000000000e+00 3.630416488647460938e+01 -8.775000000000000000e+01 5.575000000000000000e+01
2.200000000000000000e+01 5.581307692307692605e+02 2.181264038085937500e+02 -5.593963623046875000e+00 5.323492288589477539e-01 2.352941185235977173e-01 1.222402343750000000e+03 1.334195613861083984e+00 3.000000000000000000e+00 3.104202079772949219e+01 -8.725000000000000000e+01 5.575000000000000000e+01
1.500000000000000000e+01 6.716307692307690331e+02 3.728665161132812500e+02 -6.043762207031250000e+00 6.570994257926940918e-01 0.000000000000000000e+00 9.911162109375000000e+02 9.827100038528442383e-01 1.000000000000000000e+00 2.409067993164062500e+02 -7.675000000000000000e+01 5.575000000000000000e+01
1.600000000000000000e+01 6.828846153846156994e+02 3.714487609863281250e+02 -6.051788330078125000e+00 6.646087169647216797e-01 0.000000000000000000e+00 1.069111694335937500e+03 5.691452026367187500e-01 1.000000000000000000e+00 2.472135620117187500e+02 -7.625000000000000000e+01 5.575000000000000000e+01
1.700000000000000000e+01 6.784230769230769056e+02 3.686639709472656250e+02 -6.110595703125000000e+00 6.061784029006958008e-01 0.000000000000000000e+00 1.261623168945312500e+03 1.166617631912231445e+00 1.000000000000000000e+00 2.924616699218750000e+02 -7.475000000000000000e+01 5.575000000000000000e+01
2.000000000000000000e+01 6.920076923076921958e+02 3.671463317871093750e+02 -6.188079833984375000e+00 6.534813642501831055e-01 0.000000000000000000e+00 1.256668579101562500e+03 1.166630506515502930e+00 3.000000000000000000e+00 3.133516845703125000e+02 -7.425000000000000000e+01 5.575000000000000000e+01
1.700000000000000000e+01 7.000923076923075996e+02 3.658659057617187500e+02 -6.265594482421875000e+00 6.491055488586425781e-01 0.000000000000000000e+00 1.251713989257812500e+03 1.080992102622985840e+00 1.000000000000000000e+00 3.619580688476562500e+02 -7.375000000000000000e+01 5.575000000000000000e+01
7.000000000000000000e+00 7.148076923076921503e+02 3.685538635253906250e+02 -6.373107910156250000e+00 6.094406843185424805e-01 0.000000000000000000e+00 1.227287963867187500e+03 9.961355924606323242e-01 1.000000000000000000e+00 3.950920715332031250e+02 -7.225000000000000000e+01 5.575000000000000000e+01
1.200000000000000000e+01 7.266615384615383846e+02 3.748904418945312500e+02 -6.379180908203125000e+00 6.540311574935913086e-01 0.000000000000000000e+00 1.216869262695312500e+03 1.146973133087158203e+00 1.000000000000000000e+00 4.654452209472656250e+02 -7.175000000000000000e+01 5.575000000000000000e+01
1.800000000000000000e+01 7.355384615384617746e+02 3.845582885742187500e+02 -6.385253906250000000e+00 6.152860522270202637e-01 0.000000000000000000e+00 1.206450439453125000e+03 1.174466609954833984e+00 1.000000000000000000e+00 3.588356323242187500e+02 -7.125000000000000000e+01 5.575000000000000000e+01
2.900000000000000000e+01 7.452461538461537884e+02 3.956195983886718750e+02 -6.419738769531250000e+00 6.411750912666320801e-01 0.000000000000000000e+00 1.193302734375000000e+03 1.176997065544128418e+00 3.000000000000000000e+00 4.187828369140625000e+02 -7.075000000000000000e+01 5.575000000000000000e+01
2.400000000000000000e+01 7.522384615384611379e+02 4.054864501953125000e+02 -6.454223632812500000e+00 6.781827807426452637e-01 0.000000000000000000e+00 1.180155029296875000e+03 1.165372967720031738e+00 3.000000000000000000e+00 5.070025329589843750e+02 -7.025000000000000000e+01 5.575000000000000000e+01
1.400000000000000000e+01 7.811923076923077360e+02 4.152911376953125000e+02 -6.488708496093750000e+00 6.816155910491943359e-01 0.000000000000000000e+00 1.167007324218750000e+03 1.137099862098693848e+00 1.000000000000000000e+00 4.309963073730468750e+02 -6.975000000000000000e+01 5.575000000000000000e+01
1.000000000000000000e+01 7.909999999999998863e+02 4.212511596679687500e+02 -6.531219482421875000e+00 6.929040551185607910e-01 0.000000000000000000e+00 1.153738037109375000e+03 1.120547175407409668e+00 1.000000000000000000e+00 4.286069030761718750e+02 -6.925000000000000000e+01 5.575000000000000000e+01
6.000000000000000000e+00 7.725000000000000000e+02 4.248054199218750000e+02 -6.597839355468750000e+00 6.067835688591003418e-01 0.000000000000000000e+00 1.140103881835937500e+03 1.173606395721435547e+00 1.000000000000000000e+00 3.338833312988281250e+02 -6.875000000000000000e+01 5.575000000000000000e+01
3.000000000000000000e+01 7.761384615384615699e+02 4.289287414550781250e+02 -6.664428710937500000e+00 5.275106430053710938e-01 5.882353186607360840e-01 1.126469848632812500e+03 9.111219644546508789e-01 3.000000000000000000e+00 3.013778991699218750e+02 -6.825000000000000000e+01 5.575000000000000000e+01
4.000000000000000000e+00 7.832153846153845507e+02 4.374715881347656250e+02 -6.758331298828125000e+00 6.968601942062377930e-01 0.000000000000000000e+00 1.102220947265625000e+03 1.103048205375671387e+00 1.000000000000000000e+00 4.832873840332031250e+02 -6.725000000000000000e+01 5.575000000000000000e+01
2.100000000000000000e+01 7.738384615384615017e+02 4.402812194824218750e+02 -6.746307373046875000e+00 6.849215030670166016e-01 0.000000000000000000e+00 1.094625366210937500e+03 5.836147665977478027e-01 3.000000000000000000e+00 4.476566467285156250e+02 -6.675000000000000000e+01 5.575000000000000000e+01
1.100000000000000000e+01 7.712846153846155630e+02 4.417483825683593750e+02 -6.734252929687500000e+00 6.983172893524169922e-01 0.000000000000000000e+00 1.087029785156250000e+03 5.805696845054626465e-01 1.000000000000000000e+00 4.868324584960937500e+02 -6.625000000000000000e+01 5.575000000000000000e+01
2.500000000000000000e+01 7.650153846153851873e+02 4.417071838378906250e+02 -6.722198486328125000e+00 6.485813260078430176e-01 2.352941185235977173e-01 1.079434326171875000e+03 5.790897011756896973e-01 3.000000000000000000e+00 5.068322143554687500e+02 -6.575000000000000000e+01 5.575000000000000000e+01
1.300000000000000000e+01 7.662615384615384073e+02 4.397505798339843750e+02 -6.612243652343750000e+00 7.290889024734497070e-01 0.000000000000000000e+00 1.071472534179687500e+03 5.872058272361755371e-01 1.000000000000000000e+00 5.873918457031250000e+02 -6.525000000000000000e+01 5.575000000000000000e+01
7.000000000000000000e+00 7.713692307692308532e+02 4.386830139160156250e+02 -6.469635009765625000e+00 7.013118267059326172e-01 0.000000000000000000e+00 1.063388671875000000e+03 1.048797011375427246e+00 1.000000000000000000e+00 4.812661132812500000e+02 -6.475000000000000000e+01 5.575000000000000000e+01
1.200000000000000000e+01 7.736999999999997044e+02 4.321880493164062500e+02 -6.327026367187500000e+00 6.034355163574218750e-01 0.000000000000000000e+00 1.055304931640625000e+03 1.111796379089355469e+00 1.000000000000000000e+00 4.132424316406250000e+02 -6.425000000000000000e+01 5.575000000000000000e+01
1.200000000000000000e+01 7.791076923076927869e+02 4.299598083496093750e+02 -6.184387207031250000e+00 6.591221690177917480e-01 0.000000000000000000e+00 1.047221069335937500e+03 9.796922802925109863e-01 1.000000000000000000e+00 5.313784790039062500e+02 -6.375000000000000000e+01 5.575000000000000000e+01
3.000000000000000000e+01 7.774307692307689877e+02 4.321679077148437500e+02 -5.695678710937500000e+00 6.732529401779174805e-01 0.000000000000000000e+00 1.081588134765625000e+03 5.343609452247619629e-01 3.000000000000000000e+00 5.059622802734375000e+02 -6.325000000000000000e+01 5.575000000000000000e+01
5.000000000000000000e+00 8.055384615384621156e+02 4.365148315429687500e+02 -5.206970214843750000e+00 6.022722125053405762e-01 5.882352963089942932e-02 1.115955078125000000e+03 8.233730792999267578e-01 1.000000000000000000e+00 4.846524658203125000e+02 -6.275000000000000000e+01 5.575000000000000000e+01
9.000000000000000000e+00 8.507692307692309441e+02 4.389691772460937500e+02 -4.718261718750000000e+00 5.830552577972412109e-01 2.352941185235977173e-01 1.150322143554687500e+03 7.902476191520690918e-01 1.000000000000000000e+00 4.493597717285156250e+02 -6.225000000000000000e+01 5.575000000000000000e+01
1.600000000000000000e+01 8.672846153846153356e+02 4.398632507324218750e+02 -4.268493652343750000e+00 5.486003756523132324e-01 2.352941185235977173e-01 1.156882690429687500e+03 9.473795890808105469e-01 1.000000000000000000e+00 3.589900817871093750e+02 -6.175000000000000000e+01 5.575000000000000000e+01
3.500000000000000000e+01 8.697769230769229125e+02 4.344666442871093750e+02 -3.935455322265625000e+00 3.982658386230468750e-01 0.000000000000000000e+00 1.080023803710937500e+03 1.127669215202331543e+00 3.000000000000000000e+00 2.247713623046875000e+02 -6.125000000000000000e+01 5.575000000000000000e+01
3.800000000000000000e+01 4.912230769230770306e+02 2.794677124023437500e+02 -4.759826660156250000e+00 2.819713950157165527e-01 0.000000000000000000e+00 1.821118408203125000e+03 1.855760097503662109e+00 3.000000000000000000e+00 2.880841979980468750e+02 -9.975000000000000000e+01 5.625000000000000000e+01
4.700000000000000000e+01 5.160307692307692378e+02 2.818029479980468750e+02 -5.122100830078125000e+00 3.427588343620300293e-01 7.647058963775634766e-01 1.788299560546875000e+03 1.809649705886840820e+00 4.000000000000000000e+00 2.839397888183593750e+02 -9.875000000000000000e+01 5.625000000000000000e+01
4.300000000000000000e+01 5.349076923076922867e+02 2.852794494628906250e+02 -5.325286865234375000e+00 3.407414555549621582e-01 0.000000000000000000e+00 1.768313598632812500e+03 1.790428996086120605e+00 3.000000000000000000e+00 2.699998779296875000e+02 -9.825000000000000000e+01 5.625000000000000000e+01
2.700000000000000000e+01 5.520153846153846189e+02 2.868329772949218750e+02 -5.528472900390625000e+00 3.702887892723083496e-01 5.882352963089942932e-02 1.748327758789062500e+03 1.772482037544250488e+00 3.000000000000000000e+00 2.467487487792968750e+02 -9.775000000000000000e+01 5.625000000000000000e+01
3.900000000000000000e+01 5.589692307692307622e+02 2.859424133300781250e+02 -5.801818847656250000e+00 4.219394326210021973e-01 5.882353186607360840e-01 1.716587768554687500e+03 1.746454954147338867e+00 3.000000000000000000e+00 2.162818908691406250e+02 -9.675000000000000000e+01 5.625000000000000000e+01
6.800000000000000000e+01 5.636769230769230035e+02 2.828050842285156250e+02 -5.916320800781250000e+00 4.115054905414581299e-01 2.941176593303680420e-01 1.702089721679687500e+03 1.738810896873474121e+00 4.000000000000000000e+00 1.822834930419921875e+02 -9.625000000000000000e+01 5.625000000000000000e+01
5.300000000000000000e+01 5.663230769230769965e+02 2.810806274414062500e+02 -6.030822753906250000e+00 4.453948438167572021e-01 2.352941185235977173e-01 1.687591674804687500e+03 1.735881447792053223e+00 4.000000000000000000e+00 1.843469696044921875e+02 -9.575000000000000000e+01 5.625000000000000000e+01
2.300000000000000000e+01 5.703153846153846871e+02 2.806643066406250000e+02 -5.921508789062500000e+00 4.548185169696807861e-01 0.000000000000000000e+00 1.667010742187500000e+03 1.736157298088073730e+00 3.000000000000000000e+00 1.569449920654296875e+02 -9.475000000000000000e+01 5.625000000000000000e+01
2.100000000000000000e+01 5.771384615384614563e+02 2.822634582519531250e+02 -5.842712402343750000e+00 4.616631865501403809e-01 3.529411852359771729e-01 1.657321289062500000e+03 1.730347871780395508e+00 3.000000000000000000e+00 1.343840484619140625e+02 -9.425000000000000000e+01 5.625000000000000000e+01
2.000000000000000000e+01 5.691307692307690331e+02 2.831808166503906250e+02 -5.763885498046875000e+00 4.447320699691772461e-01 0.000000000000000000e+00 1.647631835937500000e+03 1.733047604560852051e+00 3.000000000000000000e+00 9.739437103271484375e+01 -9.375000000000000000e+01 5.625000000000000000e+01
1.700000000000000000e+01 5.596769230769230035e+02 2.834947814941406250e+02 -5.643676757812500000e+00 4.377565979957580566e-01 3.529411852359771729e-01 1.630913330078125000e+03 1.737283349037170410e+00 1.000000000000000000e+00 8.417530059814453125e+01 -9.325000000000000000e+01 5.625000000000000000e+01
4.000000000000000000e+01 5.641076923076923322e+02 2.813586730957031250e+02 -5.523498535156250000e+00 4.364384710788726807e-01 5.882353186607360840e-01 1.614194702148437500e+03 1.728668570518493652e+00 3.000000000000000000e+00 7.454388427734375000e+01 -9.275000000000000000e+01 5.625000000000000000e+01
2.100000000000000000e+01 5.584461538461538339e+02 2.684710998535156250e+02 -5.300537109375000000e+00 5.040379166603088379e-01 0.000000000000000000e+00 1.579067260742187500e+03 1.463148474693298340e+00 3.000000000000000000e+00 1.336609954833984375e+02 -9.175000000000000000e+01 5.625000000000000000e+01
2.600000000000000000e+01 5.654769230769231854e+02 2.574324340820312500e+02 -5.250091552734375000e+00 5.517507195472717285e-01 2.352941185235977173e-01 1.555587158203125000e+03 1.406133651733398438e+00 3.000000000000000000e+00 1.658209228515625000e+02 -9.125000000000000000e+01 5.625000000000000000e+01
2.400000000000000000e+01 5.616384615384615699e+02 2.395787200927734375e+02 -5.199676513671875000e+00 5.664390325546264648e-01 0.000000000000000000e+00 1.532107055664062500e+03 1.368508219718933105e+00 3.000000000000000000e+00 1.720549316406250000e+02 -9.075000000000000000e+01 5.625000000000000000e+01
2.100000000000000000e+01 5.638999999999999773e+02 2.171811065673828125e+02 -5.149230957031250000e+00 5.658628344535827637e-01 4.705882370471954346e-01 1.508626953125000000e+03 1.461968779563903809e+00 3.000000000000000000e+00 1.542351074218750000e+02 -9.025000000000000000e+01 5.625000000000000000e+01
2.000000000000000000e+01 5.374846153846152674e+02 2.040102844238281250e+02 -5.117156982421875000e+00 5.344720482826232910e-01 5.294117927551269531e-01 1.407734619140625000e+03 1.364401936531066895e+00 3.000000000000000000e+00 6.048418426513671875e+01 -8.875000000000000000e+01 5.625000000000000000e+01
1.500000000000000000e+01 5.304615384615384528e+02 2.088024597167968750e+02 -5.114440917968750000e+00 5.365428328514099121e-01 0.000000000000000000e+00 1.372073730468750000e+03 1.359530806541442871e+00 1.000000000000000000e+00 2.433452224731445312e+01 -8.825000000000000000e+01 5.625000000000000000e+01
1.800000000000000000e+01 6.676307692307692605e+02 3.674389648437500000e+02 -6.364440917968750000e+00 7.278376221656799316e-01 0.000000000000000000e+00 1.062487915039062500e+03 1.115779638290405273e+00 1.000000000000000000e+00 2.588358459472656250e+02 -7.575000000000000000e+01 5.625000000000000000e+01
1.600000000000000000e+01 6.814846153846151537e+02 3.657360839843750000e+02 -6.321472167968750000e+00 7.170045375823974609e-01 0.000000000000000000e+00 1.166983398437500000e+03 1.103313565254211426e+00 1.000000000000000000e+00 2.694122619628906250e+02 -7.525000000000000000e+01 5.625000000000000000e+01
1.500000000000000000e+01 6.872615384615382936e+02 3.659311828613281250e+02 -6.504516601562500000e+00 7.458711266517639160e-01 0.000000000000000000e+00 1.214711547851562500e+03 9.311547279357910156e-01 1.000000000000000000e+00 3.607840576171875000e+02 -7.375000000000000000e+01 5.625000000000000000e+01
2.000000000000000000e+00 6.930153846153843915e+02 3.660287170410156250e+02 -6.586334228515625000e+00 7.014737725257873535e-01 0.000000000000000000e+00 1.212903686523437500e+03 9.859660863876342773e-01 1.000000000000000000e+00 3.521074218750000000e+02 -7.325000000000000000e+01 5.625000000000000000e+01
1.100000000000000000e+01 6.947769230769229125e+02 3.637146301269531250e+02 -6.620056152343750000e+00 6.781230568885803223e-01 0.000000000000000000e+00 1.205407958984375000e+03 8.804175853729248047e-01 1.000000000000000000e+00 3.531479187011718750e+02 -7.275000000000000000e+01 5.625000000000000000e+01
1.400000000000000000e+01 6.968384615384619565e+02 3.605547180175781250e+02 -6.637756347656250000e+00 7.320029735565185547e-01 0.000000000000000000e+00 1.196016113281250000e+03 1.002319216728210449e+00 1.000000000000000000e+00 4.143096923828125000e+02 -7.225000000000000000e+01 5.625000000000000000e+01
1.100000000000000000e+01 6.973307692307691923e+02 3.637463378906250000e+02 -6.655456542968750000e+00 7.050255537033081055e-01 0.000000000000000000e+00 1.186624267578125000e+03 1.130012750625610352e+00 1.000000000000000000e+00 3.963080139160156250e+02 -7.175000000000000000e+01 5.625000000000000000e+01
1.300000000000000000e+01 7.213846153846154721e+02 3.792112121582031250e+02 -6.707916259765625000e+00 6.877024769783020020e-01 0.000000000000000000e+00 1.164362304687500000e+03 6.368224024772644043e-01 1.000000000000000000e+00 3.717596130371093750e+02 -7.075000000000000000e+01 5.625000000000000000e+01
2.500000000000000000e+01 7.328923076923076678e+02 3.877324218750000000e+02 -6.742706298828125000e+00 7.011829018592834473e-01 0.000000000000000000e+00 1.151492065429687500e+03 1.018613457679748535e+00 3.000000000000000000e+00 4.016611328125000000e+02 -7.025000000000000000e+01 5.625000000000000000e+01
2.100000000000000000e+01 7.359230769230772466e+02 3.925539855957031250e+02 -6.777496337890625000e+00 6.969789862632751465e-01 0.000000000000000000e+00 1.138621948242187500e+03 1.130623936653137207e+00 3.000000000000000000e+00 4.116336059570312500e+02 -6.975000000000000000e+01 5.625000000000000000e+01
3.200000000000000000e+01 7.333923076923073268e+02 3.996293334960937500e+02 -6.814910888671875000e+00 6.173734664916992188e-01 0.000000000000000000e+00 1.125488769531250000e+03 5.915339589118957520e-01 3.000000000000000000e+00 3.098997192382812500e+02 -6.925000000000000000e+01 5.625000000000000000e+01
1.200000000000000000e+01 7.171384615384612289e+02 4.042235717773437500e+02 -6.860137939453125000e+00 5.529758930206298828e-01 0.000000000000000000e+00 1.111566650390625000e+03 8.917701840400695801e-01 1.000000000000000000e+00 2.336625671386718750e+02 -6.875000000000000000e+01 5.625000000000000000e+01
1.600000000000000000e+01 7.371846153846156540e+02 4.093465576171875000e+02 -6.905395507812500000e+00 6.019433736801147461e-01 0.000000000000000000e+00 1.097644653320312500e+03 7.880217432975769043e-01 1.000000000000000000e+00 2.925050964355468750e+02 -6.825000000000000000e+01 5.625000000000000000e+01
5.000000000000000000e+00 7.556923076923072813e+02 4.209620056152343750e+02 -6.949218750000000000e+00 6.812629103660583496e-01 0.000000000000000000e+00 1.072123046875000000e+03 5.766018629074096680e-01 1.000000000000000000e+00 3.785983581542968750e+02 -6.725000000000000000e+01 5.625000000000000000e+01
7.000000000000000000e+00 7.530923076923075996e+02 4.316488342285156250e+02 -6.853118896484375000e+00 6.499283313751220703e-01 0.000000000000000000e+00 1.053569091796875000e+03 5.723278522491455078e-01 1.000000000000000000e+00 3.762397766113281250e+02 -6.625000000000000000e+01 5.625000000000000000e+01
2.700000000000000000e+01 7.607230769230770875e+02 4.353562011718750000e+02 -6.805053710937500000e+00 6.592270135879516602e-01 0.000000000000000000e+00 1.044291992187500000e+03 5.651040673255920410e-01 3.000000000000000000e+00 4.277881164550781250e+02 -6.575000000000000000e+01 5.625000000000000000e+01
3.000000000000000000e+00 7.596692307692306940e+02 4.376132812500000000e+02 -6.672485351562500000e+00 6.958299875259399414e-01 0.000000000000000000e+00 1.031967407226562500e+03 9.927079677581787109e-01 1.000000000000000000e+00 4.784231262207031250e+02 -6.525000000000000000e+01 5.625000000000000000e+01
6.000000000000000000e+00 7.609538461538463707e+02 4.371426391601562500e+02 -6.511718750000000000e+00 5.773841142654418945e-01 0.000000000000000000e+00 1.018626831054687500e+03 1.102475166320800781e+00 1.000000000000000000e+00 3.786418151855468750e+02 -6.475000000000000000e+01 5.625000000000000000e+01
1.100000000000000000e+01 7.745307692307694651e+02 4.420160217285156250e+02 -6.190216064453125000e+00 6.701493263244628906e-01 0.000000000000000000e+00 9.919456787109375000e+02 1.068192958831787109e+00 1.000000000000000000e+00 4.638409729003906250e+02 -6.375000000000000000e+01 5.625000000000000000e+01
8.000000000000000000e+00 7.848923076923080089e+02 4.486506958007812500e+02 -5.665771484375000000e+00 6.715139746665954590e-01 0.000000000000000000e+00 1.027538085937500000e+03 7.665302753448486328e-01 1.000000000000000000e+00 4.764702148437500000e+02 -6.325000000000000000e+01 5.625000000000000000e+01
7.000000000000000000e+00 8.109076923076925141e+02 4.548049926757812500e+02 -5.141326904296875000e+00 6.139407753944396973e-01 0.000000000000000000e+00 1.063130371093750000e+03 5.292410254478454590e-01 1.000000000000000000e+00 4.262676086425781250e+02 -6.275000000000000000e+01 5.625000000000000000e+01
4.200000000000000000e+01 4.707615384615384073e+02 2.850988769531250000e+02 -5.299774169921875000e+00 3.437283933162689209e-01 1.000000000000000000e+00 1.730261230468750000e+03 1.822529911994934082e+00 3.000000000000000000e+00 2.713804321289062500e+02 -9.975000000000000000e+01 5.675000000000000000e+01
2.500000000000000000e+01 5.189076923076922867e+02 2.830274353027343750e+02 -5.787567138671875000e+00 4.403336346149444580e-01 2.941176593303680420e-01 1.683068725585937500e+03 1.736800074577331543e+00 3.000000000000000000e+00 2.664328002929687500e+02 -9.825000000000000000e+01 5.675000000000000000e+01
2.800000000000000000e+01 5.321923076923077360e+02 2.863427429199218750e+02 -5.956634521484375000e+00 4.968657493591308594e-01 5.882353186607360840e-01 1.665608764648437500e+03 1.607874274253845215e+00 3.000000000000000000e+00 2.867112121582031250e+02 -9.775000000000000000e+01 5.675000000000000000e+01
2.100000000000000000e+01 5.457769230769229125e+02 2.858876037597656250e+02 -6.080718994140625000e+00 5.228346586227416992e-01 5.294117927551269531e-01 1.650115722656250000e+03 1.618479967117309570e+00 3.000000000000000000e+00 2.704757385253906250e+02 -9.725000000000000000e+01 5.675000000000000000e+01
3.000000000000000000e+01 5.532692307692307168e+02 2.859066467285156250e+02 -6.159790039062500000e+00 5.446169972419738770e-01 5.882353186607360840e-01 1.636589599609375000e+03 1.683895587921142578e+00 3.000000000000000000e+00 2.520065765380859375e+02 -9.675000000000000000e+01 5.675000000000000000e+01
1.700000000000000000e+01 5.548076923076923777e+02 2.839754333496093750e+02 -6.238891601562500000e+00 5.250038504600524902e-01 5.294117927551269531e-01 1.623063476562500000e+03 1.531571984291076660e+00 1.000000000000000000e+00 2.110770721435546875e+02 -9.625000000000000000e+01 5.675000000000000000e+01
2.400000000000000000e+01 5.572615384615385210e+02 2.840607604980468750e+02 -6.317962646484375000e+00 5.341982245445251465e-01 0.000000000000000000e+00 1.609537231445312500e+03 1.670529961585998535e+00 3.000000000000000000e+00 1.891998138427734375e+02 -9.575000000000000000e+01 5.675000000000000000e+01
2.000000000000000000e+01 5.606923076923077360e+02 2.841199035644531250e+02 -6.270812988281250000e+00 5.529835820198059082e-01 5.882353186607360840e-01 1.598694213867187500e+03 1.666671633720397949e+00 3.000000000000000000e+00 1.937855072021484375e+02 -9.525000000000000000e+01 5.675000000000000000e+01
3.000000000000000000e+01 5.606923076923077360e+02 2.855608825683593750e+02 -6.181579589843750000e+00 5.672550201416015625e-01 2.941176593303680420e-01 1.588745605468750000e+03 1.662455201148986816e+00 3.000000000000000000e+00 2.001545257568359375e+02 -9.475000000000000000e+01 5.675000000000000000e+01
2.900000000000000000e+01 5.659307692307692150e+02 2.872439575195312500e+02 -6.092346191406250000e+00 5.674048662185668945e-01 4.705882370471954346e-01 1.578796875000000000e+03 1.660020470619201660e+00 3.000000000000000000e+00 1.326187896728515625e+02 -9.425000000000000000e+01 5.675000000000000000e+01
1.200000000000000000e+01 5.567923076923077588e+02 2.888362121582031250e+02 -6.003112792968750000e+00 5.404568314552307129e-01 5.882353186607360840e-01 1.568848266601562500e+03 1.665869951248168945e+00 1.000000000000000000e+00 8.553327178955078125e+01 -9.375000000000000000e+01 5.675000000000000000e+01
1.100000000000000000e+01 5.451538461538459615e+02 2.894877014160156250e+02 -5.899078369140625000e+00 5.172680020332336426e-01 0.000000000000000000e+00 1.473778320312500000e+03 1.447736501693725586e+00 1.000000000000000000e+00 4.098532867431640625e+01 -9.275000000000000000e+01 5.675000000000000000e+01
1.700000000000000000e+01 5.419153846153845961e+02 2.852033386230468750e+02 -5.847045898437500000e+00 5.304976105690002441e-01 5.882353186607360840e-01 1.426243408203125000e+03 1.359985947608947754e+00 1.000000000000000000e+00 4.152288436889648438e+01 -9.225000000000000000e+01 5.675000000000000000e+01
2.200000000000000000e+01 5.366538461538461888e+02 2.822526855468750000e+02 -5.797821044921875000e+00 5.547459721565246582e-01 5.882352963089942932e-02 1.385537597656250000e+03 1.348816156387329102e+00 3.000000000000000000e+00 6.370685195922851562e+01 -9.175000000000000000e+01 5.675000000000000000e+01
2.100000000000000000e+01 5.397615384615385210e+02 2.775720520019531250e+02 -5.756988525390625000e+00 5.877842903137207031e-01 0.000000000000000000e+00 1.365319213867187500e+03 1.333686709403991699e+00 3.000000000000000000e+00 7.771306610107421875e+01 -9.125000000000000000e+01 5.675000000000000000e+01
1.800000000000000000e+01 5.407384615384614790e+02 2.703360900878906250e+02 -5.716156005859375000e+00 6.000890731811523438e-01 4.705882370471954346e-01 1.345100952148437500e+03 1.324351549148559570e+00 1.000000000000000000e+00 7.743944549560546875e+01 -9.075000000000000000e+01 5.675000000000000000e+01
1.100000000000000000e+01 5.317307692307693969e+02 2.572402343750000000e+02 -5.675323486328125000e+00 5.989978313446044922e-01 5.294117927551269531e-01 1.324882568359375000e+03 1.324617981910705566e+00 1.000000000000000000e+00 5.846564102172851562e+01 -9.025000000000000000e+01 5.675000000000000000e+01
1.600000000000000000e+01 5.226384615384615699e+02 2.377664642333984375e+02 -5.665008544921875000e+00 5.853718519210815430e-01 2.352941185235977173e-01 1.298897949218750000e+03 1.332634329795837402e+00 1.000000000000000000e+00 3.471508026123046875e+01 -8.975000000000000000e+01 5.675000000000000000e+01
1.400000000000000000e+01 5.215153846153846189e+02 2.280070495605468750e+02 -5.685180664062500000e+00 5.874552130699157715e-01 0.000000000000000000e+00 1.267146972656250000e+03 1.336747884750366211e+00 1.000000000000000000e+00 2.017998313903808594e+01 -8.925000000000000000e+01 5.675000000000000000e+01
8.000000000000000000e+00 6.547846153846154493e+02 3.644218139648437500e+02 -6.601074218750000000e+00 7.476922869682312012e-01 5.882352963089942932e-02 1.072254516601562500e+03 1.071328878402709961e+00 1.000000000000000000e+00 2.062329711914062500e+02 -7.575000000000000000e+01 5.675000000000000000e+01
8.000000000000000000e+00 6.698692307692306258e+02 3.631702270507812500e+02 -6.606933593750000000e+00 7.254871726036071777e-01 0.000000000000000000e+00 1.150906005859375000e+03 1.060116171836853027e+00 1.000000000000000000e+00 2.342508544921875000e+02 -7.525000000000000000e+01 5.675000000000000000e+01
8.000000000000000000e+00 6.737153846153845507e+02 3.634250793457031250e+02 -6.656066894531250000e+00 7.464213371276855469e-01 0.000000000000000000e+00 1.189292114257812500e+03 1.041847467422485352e+00 1.000000000000000000e+00 2.855773925781250000e+02 -7.475000000000000000e+01 5.675000000000000000e+01
1.000000000000000000e+00 6.746769230769230035e+02 3.615060119628906250e+02 -6.748474121093750000e+00 7.327197194099426270e-01 0.000000000000000000e+00 1.187412963867187500e+03 1.064667701721191406e+00 1.000000000000000000e+00 2.551935424804687500e+02 -7.425000000000000000e+01 5.675000000000000000e+01
1.200000000000000000e+01 6.770692307692307850e+02 3.621845703125000000e+02 -6.933288574218750000e+00 7.670791149139404297e-01 0.000000000000000000e+00 1.183654663085937500e+03 8.442507386207580566e-01 1.000000000000000000e+00 2.921921997070312500e+02 -7.325000000000000000e+01 5.675000000000000000e+01
1.000000000000000000e+01 6.766615384615383846e+02 3.548786621093750000e+02 -6.963073730468750000e+00 7.565465569496154785e-01 0.000000000000000000e+00 1.175222412109375000e+03 1.097782850265502930e+00 1.000000000000000000e+00 3.641505737304687500e+02 -7.275000000000000000e+01 5.675000000000000000e+01
7.000000000000000000e+00 6.815076923076926505e+02 3.471399841308593750e+02 -6.971984863281250000e+00 7.188422679901123047e-01 0.000000000000000000e+00 1.164605712890625000e+03 1.107300043106079102e+00 1.000000000000000000e+00 3.121589660644531250e+02 -7.225000000000000000e+01 5.675000000000000000e+01
5.000000000000000000e+00 6.845307692307692378e+02 3.499923706054687500e+02 -6.980865478515625000e+00 7.280195951461791992e-01 0.000000000000000000e+00 1.153989135742187500e+03 8.457139730453491211e-01 1.000000000000000000e+00 3.543861083984375000e+02 -7.175000000000000000e+01 5.675000000000000000e+01
1.600000000000000000e+01 6.956615384615386120e+02 3.575269470214843750e+02 -6.989776611328125000e+00 6.938484311103820801e-01 0.000000000000000000e+00 1.143372558593750000e+03 6.701660156250000000e-01 1.000000000000000000e+00 2.865787048339843750e+02 -7.125000000000000000e+01 5.675000000000000000e+01
9.000000000000000000e+00 7.069846153846153811e+02 3.648677673339843750e+02 -6.999237060546875000e+00 7.366341352462768555e-01 0.000000000000000000e+00 1.129487182617187500e+03 5.744932293891906738e-01 1.000000000000000000e+00 3.609033203125000000e+02 -7.075000000000000000e+01 5.675000000000000000e+01
3.000000000000000000e+00 7.085923076923073722e+02 3.716714477539062500e+02 -7.008697509765625000e+00 7.611307501792907715e-01 0.000000000000000000e+00 1.115601806640625000e+03 1.065947890281677246e+00 1.000000000000000000e+00 3.885753173828125000e+02 -7.025000000000000000e+01 5.675000000000000000e+01
5.000000000000000000e+00 7.018923076923075541e+02 3.818541564941406250e+02 -7.028472900390625000e+00 7.085844278335571289e-01 0.000000000000000000e+00 1.087750000000000000e+03 5.785718560218811035e-01 1.000000000000000000e+00 3.162921142578125000e+02 -6.925000000000000000e+01 5.675000000000000000e+01
3.600000000000000000e+01 7.041923076923077360e+02 3.849258422851562500e+02 -7.041412353515625000e+00 7.262680530548095703e-01 0.000000000000000000e+00 1.073540649414062500e+03 5.841964483261108398e-01 3.000000000000000000e+00 2.173418426513671875e+02 -6.875000000000000000e+01 5.675000000000000000e+01
1.800000000000000000e+01 7.156384615384619110e+02 3.871746215820312500e+02 -7.054351806640625000e+00 6.287548542022705078e-01 0.000000000000000000e+00 1.059331420898437500e+03 5.856104493141174316e-01 1.000000000000000000e+00 2.158920898437500000e+02 -6.825000000000000000e+01 5.675000000000000000e+01
2.000000000000000000e+01 7.163846153846154721e+02 3.895226440429687500e+02 -7.067291259765625000e+00 6.452643871307373047e-01 0.000000000000000000e+00 1.045122070312500000e+03 5.832008123397827148e-01 3.000000000000000000e+00 2.649891052246093750e+02 -6.775000000000000000e+01 5.675000000000000000e+01
7.000000000000000000e+00 7.210076923076924231e+02 3.920629272460937500e+02 -7.040985107421875000e+00 6.390936970710754395e-01 0.000000000000000000e+00 1.031356323242187500e+03 7.012023329734802246e-01 1.000000000000000000e+00 2.868538818359375000e+02 -6.725000000000000000e+01 5.675000000000000000e+01
4.000000000000000000e+00 7.317615384615381799e+02 3.955793151855468750e+02 -6.975402832031250000e+00 6.932470202445983887e-01 0.000000000000000000e+00 1.018034179687500000e+03 7.833921313285827637e-01 1.000000000000000000e+00 3.203096923828125000e+02 -6.675000000000000000e+01 5.675000000000000000e+01
2.000000000000000000e+00 7.540999999999999091e+02 3.964099731445312500e+02 -6.712921142578125000e+00 7.844581604003906250e-01 0.000000000000000000e+00 9.748137207031250000e+02 5.351551771163940430e-01 1.000000000000000000e+00 4.669546203613281250e+02 -6.525000000000000000e+01 5.675000000000000000e+01
1.100000000000000000e+01 7.538076923076920366e+02 3.971119384765625000e+02 -6.559600830078125000e+00 7.325596213340759277e-01 0.000000000000000000e+00 9.571528320312500000e+02 1.054559230804443359e+00 1.000000000000000000e+00 4.474161071777343750e+02 -6.475000000000000000e+01 5.675000000000000000e+01
8.000000000000000000e+00 7.877307692307692832e+02 4.164778442382812500e+02 -6.252990722656250000e+00 7.977793812751770020e-01 0.000000000000000000e+00 9.218309936523437500e+02 1.002539992332458496e+00 1.000000000000000000e+00 5.793900146484375000e+02 -6.375000000000000000e+01 5.675000000000000000e+01
2.000000000000000000e+00 7.948307692307693060e+02 4.260511474609375000e+02 -5.806671142578125000e+00 7.557671666145324707e-01 0.000000000000000000e+00 9.297231445312500000e+02 1.002912402153015137e+00 1.000000000000000000e+00 5.558328247070312500e+02 -6.325000000000000000e+01 5.675000000000000000e+01
9.000000000000000000e+00 8.544307692307691013e+02 4.504158630371093750e+02 -4.914062500000000000e+00 6.121228933334350586e-01 0.000000000000000000e+00 9.455074462890625000e+02 5.282434225082397461e-01 1.000000000000000000e+00 3.413147277832031250e+02 -6.225000000000000000e+01 5.675000000000000000e+01
3.000000000000000000e+01 4.653846153846153584e+02 2.893861694335937500e+02 -5.979919433593750000e+00 4.806712865829467773e-01 5.294117927551269531e-01 1.627691528320312500e+03 1.742000579833984375e+00 3.000000000000000000e+00 2.830822448730468750e+02 -9.925000000000000000e+01 5.725000000000000000e+01
3.100000000000000000e+01 5.078076923076924913e+02 2.843699035644531250e+02 -6.384826660156250000e+00 5.786930918693542480e-01 5.294117927551269531e-01 1.582889770507812500e+03 1.470632076263427734e+00 3.000000000000000000e+00 2.730795898437500000e+02 -9.775000000000000000e+01 5.725000000000000000e+01
4.000000000000000000e+01 5.211846153846154266e+02 2.866398925781250000e+02 -6.474121093750000000e+00 5.865976810455322266e-01 5.294117927551269531e-01 1.569145629882812500e+03 1.586370348930358887e+00 3.000000000000000000e+00 2.600805969238281250e+02 -9.725000000000000000e+01 5.725000000000000000e+01
3.300000000000000000e+01 5.320692307692307850e+02 2.889892272949218750e+02 -6.517791748046875000e+00 6.354179382324218750e-01 7.647058963775634766e-01 1.556591430664062500e+03 1.637353420257568359e+00 3.000000000000000000e+00 2.626839904785156250e+02 -9.675000000000000000e+01 5.725000000000000000e+01
3.600000000000000000e+01 5.367769230769231399e+02 2.909717712402343750e+02 -6.561431884765625000e+00 6.184244751930236816e-01 5.294117927551269531e-01 1.544037109375000000e+03 1.627463102340698242e+00 3.000000000000000000e+00 2.088924255371093750e+02 -9.625000000000000000e+01 5.725000000000000000e+01
3.300000000000000000e+01 5.430153846153846189e+02 2.947088317871093750e+02 -6.605102539062500000e+00 6.409763693809509277e-01 5.882353186607360840e-01 1.531482910156250000e+03 1.538586735725402832e+00 3.000000000000000000e+00 2.134455261230468750e+02 -9.575000000000000000e+01 5.725000000000000000e+01
1.500000000000000000e+01 5.502846153846153356e+02 2.968170471191406250e+02 -6.541259765625000000e+00 6.603593230247497559e-01 0.000000000000000000e+00 1.520688354492187500e+03 1.333189129829406738e+00 1.000000000000000000e+00 2.049047088623046875e+02 -9.525000000000000000e+01 5.725000000000000000e+01
3.900000000000000000e+01 5.487000000000000455e+02 2.989354248046875000e+02 -6.441619873046875000e+00 6.719149947166442871e-01 2.941176593303680420e-01 1.510480468750000000e+03 1.339225888252258301e+00 3.000000000000000000e+00 2.078555297851562500e+02 -9.475000000000000000e+01 5.725000000000000000e+01
2.200000000000000000e+01 5.483153846153845734e+02 3.019028015136718750e+02 -6.341979980468750000e+00 6.356334090232849121e-01 0.000000000000000000e+00 1.500272583007812500e+03 1.585100531578063965e+00 3.000000000000000000e+00 1.409266052246093750e+02 -9.425000000000000000e+01 5.725000000000000000e+01
1.300000000000000000e+01 5.388461538461538112e+02 3.048012390136718750e+02 -6.242340087890625000e+00 6.029536724090576172e-01 5.294117927551269531e-01 1.490064575195312500e+03 1.425814270973205566e+00 1.000000000000000000e+00 8.273500061035156250e+01 -9.375000000000000000e+01 5.725000000000000000e+01
5.000000000000000000e+00 5.267307692307692832e+02 3.070729980468750000e+02 -6.258483886718750000e+00 6.016715168952941895e-01 6.470588445663452148e-01 1.411713256835937500e+03 1.323691964149475098e+00 1.000000000000000000e+00 6.366521072387695312e+01 -9.325000000000000000e+01 5.725000000000000000e+01
1.100000000000000000e+01 6.350307692307692378e+02 3.611394958496093750e+02 -6.782989501953125000e+00 7.719287872314453125e-01 0.000000000000000000e+00 1.029213867187500000e+03 1.060988306999206543e+00 1.000000000000000000e+00 1.929889526367187500e+02 -7.625000000000000000e+01 5.725000000000000000e+01
2.700000000000000000e+01 6.436153846153845279e+02 3.604815063476562500e+02 -6.837707519531250000e+00 7.491223812103271484e-01 0.000000000000000000e+00 1.082021240234375000e+03 1.033354878425598145e+00 3.000000000000000000e+00 2.047686462402343750e+02 -7.575000000000000000e+01 5.725000000000000000e+01
1.100000000000000000e+01 6.588461538461540385e+02 3.566970214843750000e+02 -7.074249267578125000e+00 7.924783825874328613e-01 0.000000000000000000e+00 1.158306518554687500e+03 1.038232088088989258e+00 1.000000000000000000e+00 2.671781921386718750e+02 -7.425000000000000000e+01 5.725000000000000000e+01
5.000000000000000000e+00 6.650384615384617746e+02 3.576808776855468750e+02 -7.280242919921875000e+00 8.079916834831237793e-01 0.000000000000000000e+00 1.154405517578125000e+03 1.052275419235229492e+00 1.000000000000000000e+00 3.490818481445312500e+02 -7.325000000000000000e+01 5.725000000000000000e+01
2.000000000000000000e+00 6.695692307692307850e+02 3.513444213867187500e+02 -7.306060791015625000e+00 8.134462833404541016e-01 0.000000000000000000e+00 1.145036743164062500e+03 1.038924455642700195e+00 1.000000000000000000e+00 3.660199279785156250e+02 -7.275000000000000000e+01 5.725000000000000000e+01
1.300000000000000000e+01 6.719769230769234127e+02 3.463611145019531250e+02 -7.306182861328125000e+00 7.987613677978515625e-01 0.000000000000000000e+00 1.133195434570312500e+03 1.022112131118774414e+00 1.000000000000000000e+00 3.158491516113281250e+02 -7.225000000000000000e+01 5.725000000000000000e+01
1.200000000000000000e+01 6.808923076923075541e+02 3.456881103515625000e+02 -7.306304931640625000e+00 7.208861708641052246e-01 0.000000000000000000e+00 1.121354003906250000e+03 1.041190624237060547e+00 1.000000000000000000e+00 1.992164001464843750e+02 -7.175000000000000000e+01 5.725000000000000000e+01
3.000000000000000000e+00 6.799769230769232990e+02 3.515938720703125000e+02 -7.306427001953125000e+00 7.803732156753540039e-01 0.000000000000000000e+00 1.109512573242187500e+03 7.106392383575439453e-01 1.000000000000000000e+00 2.930547485351562500e+02 -7.125000000000000000e+01 5.725000000000000000e+01
3.000000000000000000e+00 6.913384615384619565e+02 3.569614562988281250e+02 -7.290527343750000000e+00 6.872360706329345703e-01 0.000000000000000000e+00 1.094612060546875000e+03 1.075183987617492676e+00 1.000000000000000000e+00 1.644705352783203125e+02 -7.075000000000000000e+01 5.725000000000000000e+01
1.000000000000000000e+01 6.802076923076924686e+02 3.644725646972656250e+02 -7.274658203125000000e+00 7.700463533401489258e-01 0.000000000000000000e+00 1.079711425781250000e+03 1.033385157585144043e+00 1.000000000000000000e+00 3.056560668945312500e+02 -7.025000000000000000e+01 5.725000000000000000e+01
2.400000000000000000e+01 6.708769230769231626e+02 3.682843322753906250e+02 -7.258758544921875000e+00 6.709390282630920410e-01 0.000000000000000000e+00 1.064810913085937500e+03 6.610438227653503418e-01 3.000000000000000000e+00 1.981813354492187500e+02 -6.975000000000000000e+01 5.725000000000000000e+01
2.400000000000000000e+01 6.789846153846150401e+02 3.711563720703125000e+02 -7.242004394531250000e+00 6.893543004989624023e-01 0.000000000000000000e+00 1.050011230468750000e+03 5.648152828216552734e-01 3.000000000000000000e+00 1.785205688476562500e+02 -6.925000000000000000e+01 5.725000000000000000e+01
4.000000000000000000e+00 6.870769230769229807e+02 3.732030334472656250e+02 -7.222656250000000000e+00 7.327512502670288086e-01 0.000000000000000000e+00 1.035514648437500000e+03 5.686643719673156738e-01 1.000000000000000000e+00 2.793961791992187500e+02 -6.875000000000000000e+01 5.725000000000000000e+01
6.000000000000000000e+00 6.841307692307696016e+02 3.746500244140625000e+02 -7.203277587890625000e+00 7.126655578613281250e-01 0.000000000000000000e+00 1.021018066406250000e+03 5.734046101570129395e-01 1.000000000000000000e+00 2.279540557861328125e+02 -6.825000000000000000e+01 5.725000000000000000e+01
9.000000000000000000e+00 6.939538461538460297e+02 3.754295654296875000e+02 -7.183929443359375000e+00 6.888419389724731445e-01 0.000000000000000000e+00 1.006521484375000000e+03 6.289473772048950195e-01 1.000000000000000000e+00 2.573923645019531250e+02 -6.775000000000000000e+01 5.725000000000000000e+01
3.500000000000000000e+01 6.928076923076922640e+02 3.753477478027343750e+02 -7.132720947265625000e+00 5.732933282852172852e-01 0.000000000000000000e+00 9.905895385742187500e+02 8.552296757698059082e-01 3.000000000000000000e+00 1.122589263916015625e+02 -6.725000000000000000e+01 5.725000000000000000e+01
1.500000000000000000e+01 7.080538461538459387e+02 3.734626159667968750e+02 -7.049652099609375000e+00 6.952767372131347656e-01 0.000000000000000000e+00 9.732223510742187500e+02 7.530553340911865234e-01 1.000000000000000000e+00 2.976293334960937500e+02 -6.675000000000000000e+01 5.725000000000000000e+01
3.000000000000000000e+00 7.163230769230769965e+02 3.688572387695312500e+02 -6.966583251953125000e+00 7.105990052223205566e-01 0.000000000000000000e+00 9.558551025390625000e+02 1.020755171775817871e+00 1.000000000000000000e+00 3.515057373046875000e+02 -6.625000000000000000e+01 5.725000000000000000e+01
4.100000000000000000e+01 7.440230769230767010e+02 3.127463378906250000e+02 -6.753326416015625000e+00 6.496169567108154297e-01 0.000000000000000000e+00 9.176600952148437500e+02 5.178115367889404297e-01 3.000000000000000000e+00 3.025739746093750000e+02 -6.525000000000000000e+01 5.725000000000000000e+01
7.000000000000000000e+00 7.701615384615387256e+02 2.883130187988281250e+02 -6.607482910156250000e+00 8.186136484146118164e-01 0.000000000000000000e+00 8.956788330078125000e+02 9.795003533363342285e-01 1.000000000000000000e+00 5.203536987304687500e+02 -6.475000000000000000e+01 5.725000000000000000e+01
4.000000000000000000e+00 7.801538461538463025e+02 2.962434692382812500e+02 -6.461608886718750000e+00 8.250176310539245605e-01 0.000000000000000000e+00 8.736975708007812500e+02 8.013057708740234375e-01 1.000000000000000000e+00 5.705335693359375000e+02 -6.425000000000000000e+01 5.725000000000000000e+01
1.000000000000000000e+01 8.349461538461539476e+02 3.793282775878906250e+02 -5.211273193359375000e+00 3.696346282958984375e-01 0.000000000000000000e+00 7.922921142578125000e+02 5.053638219833374023e-01 1.000000000000000000e+00 1.042281036376953125e+02 -6.225000000000000000e+01 5.725000000000000000e+01
2.700000000000000000e+01 4.548153846153846303e+02 2.943852539062500000e+02 -6.510437011718750000e+00 6.157103180885314941e-01 5.882353186607360840e-01 1.537394531250000000e+03 1.377723455429077148e+00 3.000000000000000000e+00 3.375719909667968750e+02 -9.925000000000000000e+01 5.775000000000000000e+01
2.300000000000000000e+01 4.575923076923077701e+02 2.906404418945312500e+02 -6.611297607421875000e+00 6.130390763282775879e-01 5.882352963089942932e-02 1.524986694335937500e+03 1.363672614097595215e+00 3.000000000000000000e+00 2.918372802734375000e+02 -9.875000000000000000e+01 5.775000000000000000e+01
3.800000000000000000e+01 4.712769230769230830e+02 2.927523193359375000e+02 -6.712127685546875000e+00 6.538733243942260742e-01 5.882352963089942932e-02 1.512578735351562500e+03 1.343241572380065918e+00 3.000000000000000000e+00 2.994298706054687500e+02 -9.825000000000000000e+01 5.775000000000000000e+01
3.100000000000000000e+01 4.871615384615384414e+02 2.984258117675781250e+02 -6.812988281250000000e+00 6.804945468902587891e-01 5.294117927551269531e-01 1.500170776367187500e+03 1.321664214134216309e+00 3.000000000000000000e+00 3.114528503417968750e+02 -9.775000000000000000e+01 5.775000000000000000e+01
3.100000000000000000e+01 5.106615384615384983e+02 3.029192199707031250e+02 -6.875762939453125000e+00 7.185564637184143066e-01 2.941176593303680420e-01 1.476593261718750000e+03 1.350999593734741211e+00 3.000000000000000000e+00 2.929223632812500000e+02 -9.675000000000000000e+01 5.775000000000000000e+01
2.900000000000000000e+01 5.176230769230769511e+02 3.095821838378906250e+02 -6.884002685546875000e+00 7.102361917495727539e-01 2.941176593303680420e-01 1.465010864257812500e+03 1.380593419075012207e+00 3.000000000000000000e+00 2.233167572021484375e+02 -9.625000000000000000e+01 5.775000000000000000e+01
2.300000000000000000e+01 5.293923076923076678e+02 3.196217346191406250e+02 -6.811737060546875000e+00 7.322881817817687988e-01 5.882352963089942932e-02 1.442682495117187500e+03 1.260851860046386719e+00 3.000000000000000000e+00 1.948545532226562500e+02 -9.525000000000000000e+01 5.775000000000000000e+01
2.000000000000000000e+01 5.314999999999998863e+02 3.228826599121093750e+02 -6.701690673828125000e+00 7.209331393241882324e-01 1.176470592617988586e-01 1.432215332031250000e+03 1.253926753997802734e+00 3.000000000000000000e+00 1.552154235839843750e+02 -9.475000000000000000e+01 5.775000000000000000e+01
1.100000000000000000e+01 5.310923076923077133e+02 3.248141479492187500e+02 -6.591613769531250000e+00 6.836498379707336426e-01 1.764705926179885864e-01 1.421748168945312500e+03 1.257944822311401367e+00 1.000000000000000000e+00 8.596768188476562500e+01 -9.425000000000000000e+01 5.775000000000000000e+01
1.200000000000000000e+01 5.193538461538462343e+02 3.257522277832031250e+02 -6.481536865234375000e+00 6.669861078262329102e-01 0.000000000000000000e+00 1.411281005859375000e+03 1.268245697021484375e+00 1.000000000000000000e+00 6.084837722778320312e+01 -9.375000000000000000e+01 5.775000000000000000e+01
1.500000000000000000e+01 5.093769230769231058e+02 3.260068969726562500e+02 -6.565887451171875000e+00 6.672417521476745605e-01 0.000000000000000000e+00 1.302113159179687500e+03 1.275824427604675293e+00 1.000000000000000000e+00 4.140675735473632812e+01 -9.325000000000000000e+01 5.775000000000000000e+01
1.900000000000000000e+01 6.094384615384614108e+02 3.607573547363281250e+02 -6.970764160156250000e+00 7.784930467605590820e-01 0.000000000000000000e+00 1.064824707031250000e+03 1.023762583732604980e+00 1.000000000000000000e+00 1.193331985473632812e+02 -7.625000000000000000e+01 5.775000000000000000e+01
1.800000000000000000e+01 6.187692307692303757e+02 3.587217407226562500e+02 -7.074340820312500000e+00 7.823342084884643555e-01 0.000000000000000000e+00 1.091787963867187500e+03 1.017473936080932617e+00 1.000000000000000000e+00 1.550246734619140625e+02 -7.575000000000000000e+01 5.775000000000000000e+01
1.000000000000000000e+00 6.344230769230772466e+02 3.560100402832031250e+02 -7.177886962890625000e+00 8.152818679809570312e-01 0.000000000000000000e+00 1.118751220703125000e+03 7.820108532905578613e-01 1.000000000000000000e+00 2.195699615478515625e+02 -7.525000000000000000e+01 5.775000000000000000e+01
2.000000000000000000e+00 6.548923076923076678e+02 3.515917968750000000e+02 -7.513610839843750000e+00 8.149925470352172852e-01 0.000000000000000000e+00 1.127178222656250000e+03 9.559279084205627441e-01 1.000000000000000000e+00 2.758464965820312500e+02 -7.375000000000000000e+01 5.775000000000000000e+01
1.000000000000000000e+00 6.515307692307692378e+02 3.521855773925781250e+02 -7.627197265625000000e+00 8.029609918594360352e-01 0.000000000000000000e+00 1.125156372070312500e+03 1.015902876853942871e+00 1.000000000000000000e+00 2.060795745849609375e+02 -7.325000000000000000e+01 5.775000000000000000e+01
1.000000000000000000e+00 6.521461538461539931e+02 3.470076904296875000e+02 -7.649078369140625000e+00 8.118355274200439453e-01 0.000000000000000000e+00 1.114851196289062500e+03 1.019946813583374023e+00 1.000000000000000000e+00 2.757777099609375000e+02 -7.275000000000000000e+01 5.775000000000000000e+01
2.000000000000000000e+00 6.561615384615386120e+02 3.429375915527343750e+02 -7.640411376953125000e+00 8.075142502784729004e-01 0.000000000000000000e+00 1.101785034179687500e+03 1.025767564773559570e+00 1.000000000000000000e+00 2.882894897460937500e+02 -7.225000000000000000e+01 5.775000000000000000e+01
2.000000000000000000e+00 6.634076923076919456e+02 3.553986511230468750e+02 -7.581848144531250000e+00 8.211951851844787598e-01 0.000000000000000000e+00 1.059736938476562500e+03 9.662100076675415039e-01 1.000000000000000000e+00 2.833488159179687500e+02 -7.075000000000000000e+01 5.775000000000000000e+01
5.000000000000000000e+00 6.456846153846150855e+02 3.597884521484375000e+02 -7.540618896484375000e+00 7.863923907279968262e-01 0.000000000000000000e+00 1.043821166992187500e+03 7.394947409629821777e-01 1.000000000000000000e+00 2.525316467285156250e+02 -7.025000000000000000e+01 5.775000000000000000e+01
1.000000000000000000e+01 6.422076923076922412e+02 3.641304626464843750e+02 -7.499389648437500000e+00 7.380760312080383301e-01 0.000000000000000000e+00 1.027905273437500000e+03 5.892959833145141602e-01 1.000000000000000000e+00 1.951700439453125000e+02 -6.975000000000000000e+01 5.775000000000000000e+01
4.100000000000000000e+01 6.458307692307693060e+02 3.664996032714843750e+02 -7.455566406250000000e+00 6.961312890052795410e-01 5.294117927551269531e-01 1.012272521972656250e+03 5.789250135421752930e-01 3.000000000000000000e+00 1.656589660644531250e+02 -6.925000000000000000e+01 5.775000000000000000e+01
1.900000000000000000e+01 6.507076923076924686e+02 3.672040405273437500e+02 -7.403900146484375000e+00 7.594821453094482422e-01 3.529411852359771729e-01 9.974886474609375000e+02 1.131980538368225098e+00 1.000000000000000000e+00 2.183103637695312500e+02 -6.875000000000000000e+01 5.775000000000000000e+01
2.900000000000000000e+01 6.517076923076919002e+02 3.681517944335937500e+02 -7.352233886718750000e+00 6.671760082244873047e-01 0.000000000000000000e+00 9.827047729492187500e+02 1.138647079467773438e+00 3.000000000000000000e+00 1.307790832519531250e+02 -6.825000000000000000e+01 5.775000000000000000e+01
3.000000000000000000e+00 6.672923076923078725e+02 3.689873046875000000e+02 -7.300567626953125000e+00 7.021793127059936523e-01 0.000000000000000000e+00 9.679208984375000000e+02 1.136288523674011230e+00 1.000000000000000000e+00 1.541508789062500000e+02 -6.775000000000000000e+01 5.775000000000000000e+01
1.500000000000000000e+01 6.892692307692310578e+02 3.638772583007812500e+02 -7.123870849609375000e+00 6.764634251594543457e-01 0.000000000000000000e+00 9.284104614257812500e+02 1.060919523239135742e+00 1.000000000000000000e+00 1.960795593261718750e+02 -6.675000000000000000e+01 5.775000000000000000e+01
2.600000000000000000e+01 7.006999999999999318e+02 3.486219177246093750e+02 -7.023284912109375000e+00 6.517741084098815918e-01 0.000000000000000000e+00 9.069981079101562500e+02 1.092450976371765137e+00 3.000000000000000000e+00 2.183026733398437500e+02 -6.625000000000000000e+01 5.775000000000000000e+01
7.000000000000000000e+00 7.208384615384612744e+02 3.150150451660156250e+02 -6.922698974609375000e+00 8.099564313888549805e-01 0.000000000000000000e+00 8.855858154296875000e+02 1.051777005195617676e+00 1.000000000000000000e+00 4.139905090332031250e+02 -6.575000000000000000e+01 5.775000000000000000e+01
6.000000000000000000e+00 7.733230769230768828e+02 2.160654602050781250e+02 -6.655364990234375000e+00 8.594260215759277344e-01 0.000000000000000000e+00 8.342048339843750000e+02 9.090786576271057129e-01 1.000000000000000000e+00 6.798215332031250000e+02 -6.475000000000000000e+01 5.775000000000000000e+01
2.000000000000000000e+00 7.940230769230768146e+02 2.023429412841796875e+02 -6.516937255859375000e+00 8.841282129287719727e-01 0.000000000000000000e+00 8.079031982421875000e+02 7.099615335464477539e-01 1.000000000000000000e+00 6.805135498046875000e+02 -6.425000000000000000e+01 5.775000000000000000e+01
5.000000000000000000e+00 8.004384615384614108e+02 2.060575561523437500e+02 -6.378540039062500000e+00 8.804435133934020996e-01 0.000000000000000000e+00 7.816015625000000000e+02 7.690528631210327148e-01 1.000000000000000000e+00 5.954909057617187500e+02 -6.375000000000000000e+01 5.775000000000000000e+01
9.000000000000000000e+00 8.014615384615383391e+02 2.135854644775390625e+02 -6.088500976562500000e+00 8.301753997802734375e-01 0.000000000000000000e+00 7.340933227539062500e+02 7.957164049148559570e-01 1.000000000000000000e+00 5.241501464843750000e+02 -6.325000000000000000e+01 5.775000000000000000e+01
7.000000000000000000e+00 8.027230769230766327e+02 2.237556762695312500e+02 -5.798492431640625000e+00 5.715137720108032227e-01 0.000000000000000000e+00 6.865850830078125000e+02 6.888399124145507812e-01 1.000000000000000000e+00 2.916907958984375000e+02 -6.275000000000000000e+01 5.775000000000000000e+01
2.200000000000000000e+01 4.365846153846152902e+02 3.018491516113281250e+02 -6.909820556640625000e+00 6.690508127212524414e-01 0.000000000000000000e+00 1.463132446289062500e+03 1.352169990539550781e+00 3.000000000000000000e+00 3.422698059082031250e+02 -9.975000000000000000e+01 5.825000000000000000e+01
2.800000000000000000e+01 4.398615384615384301e+02 2.956982421875000000e+02 -7.027984619140625000e+00 7.110682725906372070e-01 0.000000000000000000e+00 1.452522216796875000e+03 1.336229920387268066e+00 3.000000000000000000e+00 3.558095092773437500e+02 -9.925000000000000000e+01 5.825000000000000000e+01
3.100000000000000000e+01 4.467769230769231967e+02 2.944262390136718750e+02 -7.094818115234375000e+00 7.143106460571289062e-01 5.882352963089942932e-02 1.442464965820312500e+03 1.320408701896667480e+00 3.000000000000000000e+00 3.157325439453125000e+02 -9.875000000000000000e+01 5.825000000000000000e+01
2.200000000000000000e+01 4.527076923076922981e+02 3.051134948730468750e+02 -7.161621093750000000e+00 7.062148451805114746e-01 0.000000000000000000e+00 1.432407714843750000e+03 1.416138172149658203e+00 3.000000000000000000e+00 2.743670959472656250e+02 -9.825000000000000000e+01 5.825000000000000000e+01
2.300000000000000000e+01 4.767538461538462116e+02 3.405491638183593750e+02 -7.250854492187500000e+00 7.643154859542846680e-01 3.529411852359771729e-01 1.412084594726562500e+03 1.527974247932434082e+00 3.000000000000000000e+00 2.786691894531250000e+02 -9.725000000000000000e+01 5.825000000000000000e+01
1.900000000000000000e+01 4.836384615384614563e+02 3.258676452636718750e+02 -7.228851318359375000e+00 7.812466025352478027e-01 0.000000000000000000e+00 1.401610107421875000e+03 1.336615443229675293e+00 1.000000000000000000e+00 2.558912811279296875e+02 -9.675000000000000000e+01 5.825000000000000000e+01
1.700000000000000000e+01 4.883384615384615017e+02 3.294394226074218750e+02 -7.206817626953125000e+00 7.955338954925537109e-01 0.000000000000000000e+00 1.391135498046875000e+03 1.243093371391296387e+00 1.000000000000000000e+00 2.371748046875000000e+02 -9.625000000000000000e+01 5.825000000000000000e+01
1.400000000000000000e+01 4.940153846153843915e+02 3.346705627441406250e+02 -7.184814453125000000e+00 7.533912062644958496e-01 0.000000000000000000e+00 1.380660888671875000e+03 1.239164352416992188e+00 1.000000000000000000e+00 1.608556365966796875e+02 -9.575000000000000000e+01 5.825000000000000000e+01
1.300000000000000000e+01 5.006923076923076792e+02 3.398434448242187500e+02 -7.101318359375000000e+00 7.469299435615539551e-01 5.882352963089942932e-02 1.365154663085937500e+03 1.233907699584960938e+00 1.000000000000000000e+00 1.213580322265625000e+02 -9.525000000000000000e+01 5.825000000000000000e+01
1.100000000000000000e+01 5.003384615384615017e+02 3.439821777343750000e+02 -6.997344970703125000e+00 7.396224737167358398e-01 0.000000000000000000e+00 1.347971191406250000e+03 1.228657960891723633e+00 1.000000000000000000e+00 8.067201232910156250e+01 -9.475000000000000000e+01 5.825000000000000000e+01
1.100000000000000000e+01 5.067846153846154493e+02 3.458674926757812500e+02 -6.893371582031250000e+00 7.279773354530334473e-01 5.294117927551269531e-01 1.330787597656250000e+03 1.225243091583251953e+00 1.000000000000000000e+00 4.785131072998046875e+01 -9.425000000000000000e+01 5.825000000000000000e+01
1.100000000000000000e+01 4.979461538461537202e+02 3.464756774902343750e+02 -6.789398193359375000e+00 7.343179583549499512e-01 0.000000000000000000e+00 1.313604125976562500e+03 1.226297736167907715e+00 1.000000000000000000e+00 5.264616394042968750e+01 -9.375000000000000000e+01 5.825000000000000000e+01
1.300000000000000000e+01 5.803769230769231626e+02 3.624862365722656250e+02 -7.108489990234375000e+00 8.416341543197631836e-01 0.000000000000000000e+00 1.067582031250000000e+03 9.993839263916015625e-01 1.000000000000000000e+00 1.285092926025390625e+02 -7.675000000000000000e+01 5.825000000000000000e+01
1.400000000000000000e+01 5.981923076923079634e+02 3.618207397460937500e+02 -7.251220703125000000e+00 8.429519534111022949e-01 0.000000000000000000e+00 1.075756347656250000e+03 9.898654222488403320e-01 1.000000000000000000e+00 1.830498962402343750e+02 -7.625000000000000000e+01 5.825000000000000000e+01
1.000000000000000000e+00 6.190153846153846189e+02 3.545684204101562500e+02 -7.536651611328125000e+00 8.344597816467285156e-01 0.000000000000000000e+00 1.092104858398437500e+03 9.885360598564147949e-01 1.000000000000000000e+00 1.683203125000000000e+02 -7.525000000000000000e+01 5.825000000000000000e+01
9.000000000000000000e+00 6.283384615384613880e+02 3.503930358886718750e+02 -7.665985107421875000e+00 8.503240346908569336e-01 0.000000000000000000e+00 1.094892089843750000e+03 9.884228110313415527e-01 1.000000000000000000e+00 2.091840057373046875e+02 -7.475000000000000000e+01 5.825000000000000000e+01
2.000000000000000000e+00 6.379307692307692150e+02 3.468566284179687500e+02 -7.781921386718750000e+00 8.517006635665893555e-01 0.000000000000000000e+00 1.092291992187500000e+03 9.865288138389587402e-01 1.000000000000000000e+00 2.183224792480468750e+02 -7.425000000000000000e+01 5.825000000000000000e+01
3.000000000000000000e+00 6.364846153846154948e+02 3.459406738281250000e+02 -7.897857666015625000e+00 8.553360104560852051e-01 0.000000000000000000e+00 1.089692016601562500e+03 9.918560981750488281e-01 1.000000000000000000e+00 2.340933227539062500e+02 -7.375000000000000000e+01 5.825000000000000000e+01
4.000000000000000000e+00 6.378230769230765418e+02 3.451572570800781250e+02 -8.013793945312500000e+00 8.378705382347106934e-01 0.000000000000000000e+00 1.087092041015625000e+03 1.002239584922790527e+00 1.000000000000000000e+00 2.283166503906250000e+02 -7.325000000000000000e+01 5.825000000000000000e+01
2.000000000000000000e+00 6.293538461538463480e+02 3.332554626464843750e+02 -8.021606445312500000e+00 8.393393158912658691e-01 0.000000000000000000e+00 1.075923706054687500e+03 9.175959229469299316e-01 1.000000000000000000e+00 2.222808685302734375e+02 -7.275000000000000000e+01 5.825000000000000000e+01
2.000000000000000000e+00 6.342999999999998408e+02 3.293471374511718750e+02 -7.993316650390625000e+00 8.508619666099548340e-01 0.000000000000000000e+00 1.061899414062500000e+03 6.847196221351623535e-01 1.000000000000000000e+00 2.436670989990234375e+02 -7.225000000000000000e+01 5.825000000000000000e+01
8.000000000000000000e+00 6.348230769230771102e+02 3.309863586425781250e+02 -7.965057373046875000e+00 8.398922681808471680e-01 0.000000000000000000e+00 1.047875000000000000e+03 5.229907631874084473e-01 1.000000000000000000e+00 2.202840118408203125e+02 -7.175000000000000000e+01 5.825000000000000000e+01
4.000000000000000000e+00 6.359999999999998863e+02 3.376991882324218750e+02 -7.936798095703125000e+00 8.317531943321228027e-01 0.000000000000000000e+00 1.033850585937500000e+03 9.177876710891723633e-01 1.000000000000000000e+00 2.102079315185546875e+02 -7.125000000000000000e+01 5.825000000000000000e+01
7.000000000000000000e+00 6.358538461538460069e+02 3.440933227539062500e+02 -7.874176025390625000e+00 8.430687189102172852e-01 0.000000000000000000e+00 1.008744995117187500e+03 1.031439304351806641e+00 1.000000000000000000e+00 2.712677917480468750e+02 -7.075000000000000000e+01 5.825000000000000000e+01
9.000000000000000000e+00 6.244538461538462570e+02 3.508926696777343750e+02 -7.811584472656250000e+00 7.969705462455749512e-01 0.000000000000000000e+00 9.836394042968750000e+02 9.790941476821899414e-01 1.000000000000000000e+00 1.672048645019531250e+02 -7.025000000000000000e+01 5.825000000000000000e+01
6.000000000000000000e+00 6.264846153846153811e+02 3.597110595703125000e+02 -7.679840087890625000e+00 7.843855619430541992e-01 0.000000000000000000e+00 9.362366943359375000e+02 1.074969172477722168e+00 1.000000000000000000e+00 2.202781829833984375e+02 -6.925000000000000000e+01 5.825000000000000000e+01
2.000000000000000000e+00 6.171615384615383846e+02 3.620679321289062500e+02 -7.591217041015625000e+00 7.349168062210083008e-01 0.000000000000000000e+00 9.223649291992187500e+02 1.046243786811828613e+00 1.000000000000000000e+00 1.424410858154296875e+02 -6.875000000000000000e+01 5.825000000000000000e+01
8.000000000000000000e+00 7.065769230769232081e+02 2.903945007324218750e+02 -6.964721679687500000e+00 7.571965456008911133e-01 0.000000000000000000e+00 8.085963745117187500e+02 6.222917437553405762e-01 1.000000000000000000e+00 2.580671386718750000e+02 -6.575000000000000000e+01 5.825000000000000000e+01
6.000000000000000000e+00 7.825538461538458250e+02 1.912939910888671875e+02 -6.701416015625000000e+00 9.200986623764038086e-01 0.000000000000000000e+00 7.561495971679687500e+02 6.547117829322814941e-01 1.000000000000000000e+00 7.302781372070312500e+02 -6.475000000000000000e+01 5.825000000000000000e+01
1.000000000000000000e+00 7.933769230769232763e+02 1.501185455322265625e+02 -6.433502197265625000e+00 8.119012117385864258e-01 0.000000000000000000e+00 7.026667480468750000e+02 6.590232253074645996e-01 1.000000000000000000e+00 7.064328613281250000e+02 -6.375000000000000000e+01 5.825000000000000000e+01
1.000000000000000000e+01 7.795615384615381345e+02 1.426072540283203125e+02 -6.192077636718750000e+00 7.732964754104614258e-01 0.000000000000000000e+00 6.429718017578125000e+02 5.893237590789794922e-01 1.000000000000000000e+00 3.732927246093750000e+02 -6.325000000000000000e+01 5.825000000000000000e+01
2.400000000000000000e+01 4.126230769230768374e+02 3.076873474121093750e+02 -7.418273925781250000e+00 7.360563874244689941e-01 5.882352963089942932e-02 1.389708740234375000e+03 1.595520019531250000e+00 3.000000000000000000e+00 3.417160644531250000e+02 -9.975000000000000000e+01 5.875000000000000000e+01
2.000000000000000000e+01 4.159769230769231285e+02 2.999122619628906250e+02 -7.516967773437500000e+00 7.158634066581726074e-01 1.176470592617988586e-01 1.379600341796875000e+03 1.313924312591552734e+00 3.000000000000000000e+00 2.555708160400390625e+02 -9.925000000000000000e+01 5.875000000000000000e+01
3.900000000000000000e+01 4.221153846153844711e+02 3.030251770019531250e+02 -7.549926757812500000e+00 7.663652300834655762e-01 5.294117927551269531e-01 1.371507690429687500e+03 1.289463996887207031e+00 3.000000000000000000e+00 2.800173034667968750e+02 -9.875000000000000000e+01 5.875000000000000000e+01
1.800000000000000000e+01 4.334923076923076906e+02 3.287607421875000000e+02 -7.582916259765625000e+00 7.730506062507629395e-01 0.000000000000000000e+00 1.363415039062500000e+03 1.265640735626220703e+00 1.000000000000000000e+00 2.664277038574218750e+02 -9.825000000000000000e+01 5.875000000000000000e+01
1.500000000000000000e+01 4.443538461538461206e+02 3.563405456542968750e+02 -7.615875244140625000e+00 7.812902927398681641e-01 3.529411852359771729e-01 1.355322387695312500e+03 1.241827249526977539e+00 1.000000000000000000e+00 2.406524963378906250e+02 -9.775000000000000000e+01 5.875000000000000000e+01
1.600000000000000000e+01 4.536846153846153697e+02 3.694195251464843750e+02 -7.611938476562500000e+00 8.297439813613891602e-01 3.529411852359771729e-01 1.346742431640625000e+03 1.224807381629943848e+00 1.000000000000000000e+00 2.784633483886718750e+02 -9.725000000000000000e+01 5.875000000000000000e+01
1.900000000000000000e+01 4.566769230769230035e+02 3.582849426269531250e+02 -7.571105957031250000e+00 8.114103674888610840e-01 5.882353186607360840e-01 1.337675170898437500e+03 1.221194982528686523e+00 1.000000000000000000e+00 2.125424499511718750e+02 -9.675000000000000000e+01 5.875000000000000000e+01
1.600000000000000000e+01 4.589846153846153243e+02 3.468065490722656250e+02 -7.530273437500000000e+00 8.025409579277038574e-01 0.000000000000000000e+00 1.328607910156250000e+03 1.244909048080444336e+00 1.000000000000000000e+00 1.713022155761718750e+02 -9.625000000000000000e+01 5.875000000000000000e+01
1.000000000000000000e+01 4.634615384615386233e+02 3.498574218750000000e+02 -7.489440917968750000e+00 7.927920818328857422e-01 0.000000000000000000e+00 1.319540649414062500e+03 1.215701103210449219e+00 1.000000000000000000e+00 1.112412796020507812e+02 -9.575000000000000000e+01 5.875000000000000000e+01
1.200000000000000000e+01 4.679307692307692719e+02 3.529029541015625000e+02 -7.433044433593750000e+00 7.877133488655090332e-01 0.000000000000000000e+00 1.288679931640625000e+03 1.209077358245849609e+00 1.000000000000000000e+00 7.201416778564453125e+01 -9.525000000000000000e+01 5.875000000000000000e+01
8.000000000000000000e+00 5.228307692307688512e+02 3.619438476562500000e+02 -7.273712158203125000e+00 8.621365427970886230e-01 0.000000000000000000e+00 9.191732788085937500e+02 9.877595901489257812e-01 1.000000000000000000e+00 6.980851745605468750e+01 -7.775000000000000000e+01 5.875000000000000000e+01
7.000000000000000000e+00 5.837230769230769738e+02 3.513133544921875000e+02 -8.056915283203125000e+00 8.608537912368774414e-01 0.000000000000000000e+00 1.042174682617187500e+03 9.515888094902038574e-01 1.000000000000000000e+00 1.563141632080078125e+02 -7.525000000000000000e+01 5.875000000000000000e+01
4.000000000000000000e+00 5.888307692307691923e+02 3.447456665039062500e+02 -8.187286376953125000e+00 8.585017323493957520e-01 0.000000000000000000e+00 1.042491333007812500e+03 9.720791578292846680e-01 1.000000000000000000e+00 1.729338836669921875e+02 -7.475000000000000000e+01 5.875000000000000000e+01
1.000000000000000000e+00 5.994538461538458023e+02 3.315397644042968750e+02 -8.387634277343750000e+00 8.695172667503356934e-01 0.000000000000000000e+00 1.033902099609375000e+03 9.743518829345703125e-01 1.000000000000000000e+00 2.195033111572265625e+02 -7.375000000000000000e+01 5.875000000000000000e+01
2.000000000000000000e+00 5.986692307692308077e+02 3.180507202148437500e+02 -8.487823486328125000e+00 8.639644384384155273e-01 0.000000000000000000e+00 1.029607421875000000e+03 9.772980213165283203e-01 1.000000000000000000e+00 2.161501922607421875e+02 -7.325000000000000000e+01 5.875000000000000000e+01
4.000000000000000000e+00 5.930538461538462798e+02 3.019140930175781250e+02 -8.459106445312500000e+00 8.602637648582458496e-01 0.000000000000000000e+00 1.017737304687500000e+03 9.781803488731384277e-01 1.000000000000000000e+00 2.294773406982421875e+02 -7.275000000000000000e+01 5.875000000000000000e+01
7.000000000000000000e+00 5.936384615384616836e+02 3.046664428710937500e+02 -8.244110107421875000e+00 8.551501035690307617e-01 0.000000000000000000e+00 9.745515747070312500e+02 9.888445138931274414e-01 1.000000000000000000e+00 2.178552551269531250e+02 -7.125000000000000000e+01 5.875000000000000000e+01
1.000000000000000000e+00 5.889461538461536065e+02 3.147366943359375000e+02 -8.168823242187500000e+00 8.349283337593078613e-01 0.000000000000000000e+00 9.222470703125000000e+02 9.976063966751098633e-01 1.000000000000000000e+00 1.953657379150390625e+02 -7.075000000000000000e+01 5.875000000000000000e+01
2.000000000000000000e+00 5.761769230769227761e+02 3.405030517578125000e+02 -7.927795410156250000e+00 7.945289015769958496e-01 0.000000000000000000e+00 7.758303833007812500e+02 1.069098711013793945e+00 1.000000000000000000e+00 1.521201171875000000e+02 -6.925000000000000000e+01 5.875000000000000000e+01
1.000000000000000000e+00 7.809923076923078042e+02 1.739614868164062500e+02 -6.743438720703125000e+00 8.037995100021362305e-01 0.000000000000000000e+00 6.415651245117187500e+02 6.351510882377624512e-01 1.000000000000000000e+00 4.642193298339843750e+02 -6.475000000000000000e+01 5.875000000000000000e+01
1.000000000000000000e+00 8.044769230769228443e+02 1.486353149414062500e+02 -6.607360839843750000e+00 9.440476894378662109e-01 0.000000000000000000e+00 6.229329833984375000e+02 5.782564878463745117e-01 1.000000000000000000e+00 8.047982177734375000e+02 -6.425000000000000000e+01 5.875000000000000000e+01
2.000000000000000000e+00 8.351769230769235719e+02 1.350252075195312500e+02 -6.471313476562500000e+00 7.564336657524108887e-01 0.000000000000000000e+00 6.043009033203125000e+02 5.775622129440307617e-01 1.000000000000000000e+00 4.791610717773437500e+02 -6.375000000000000000e+01 5.875000000000000000e+01
2.100000000000000000e+01 4.120615384615385324e+02 3.228245544433593750e+02 -8.004180908203125000e+00 8.545417785644531250e-01 0.000000000000000000e+00 1.294422241210937500e+03 1.229814171791076660e+00 3.000000000000000000e+00 2.997434082031250000e+02 -9.825000000000000000e+01 5.925000000000000000e+01
1.600000000000000000e+01 4.254230769230767919e+02 3.517294616699218750e+02 -7.973022460937500000e+00 8.629454970359802246e-01 0.000000000000000000e+00 1.281400146484375000e+03 1.201303839683532715e+00 1.000000000000000000e+00 2.479955596923828125e+02 -9.725000000000000000e+01 5.925000000000000000e+01
1.700000000000000000e+01 4.297230769230769170e+02 3.522848205566406250e+02 -7.913360595703125000e+00 8.625352978706359863e-01 0.000000000000000000e+00 1.273740112304687500e+03 1.193856596946716309e+00 1.000000000000000000e+00 2.209287567138671875e+02 -9.675000000000000000e+01 5.925000000000000000e+01
1.600000000000000000e+01 4.336153846153845279e+02 3.474692687988281250e+02 -7.853698730468750000e+00 8.536284565925598145e-01 0.000000000000000000e+00 1.266080200195312500e+03 1.189223766326904297e+00 1.000000000000000000e+00 1.781876831054687500e+02 -9.625000000000000000e+01 5.925000000000000000e+01
1.600000000000000000e+01 4.373999999999999773e+02 3.506015930175781250e+02 -7.794036865234375000e+00 8.391416072845458984e-01 0.000000000000000000e+00 1.258420288085937500e+03 1.187731504440307617e+00 1.000000000000000000e+00 1.154014282226562500e+02 -9.575000000000000000e+01 5.925000000000000000e+01
1.500000000000000000e+01 4.355692307692307281e+02 3.552844848632812500e+02 -7.764770507812500000e+00 8.358792066574096680e-01 0.000000000000000000e+00 1.212205200195312500e+03 1.191305637359619141e+00 1.000000000000000000e+00 6.753710937500000000e+01 -9.525000000000000000e+01 5.925000000000000000e+01
9.000000000000000000e+00 5.092615384615385210e+02 3.618475646972656250e+02 -7.857849121093750000e+00 8.831725716590881348e-01 0.000000000000000000e+00 9.445876464843750000e+02 8.760915398597717285e-01 1.000000000000000000e+00 7.398331451416015625e+01 -7.725000000000000000e+01 5.925000000000000000e+01
7.000000000000000000e+00 5.295230769230770420e+02 3.605105590820312500e+02 -8.041931152343750000e+00 8.840703368186950684e-01 0.000000000000000000e+00 9.871988525390625000e+02 7.326176166534423828e-01 1.000000000000000000e+00 1.069027481079101562e+02 -7.675000000000000000e+01 5.925000000000000000e+01
2.000000000000000000e+00 5.364153846153842551e+02 3.570266113281250000e+02 -8.220367431640625000e+00 8.825507164001464844e-01 0.000000000000000000e+00 9.888807373046875000e+02 7.234508395195007324e-01 1.000000000000000000e+00 1.198220977783203125e+02 -7.625000000000000000e+01 5.925000000000000000e+01
7.000000000000000000e+00 5.394769230769235264e+02 3.505597534179687500e+02 -8.398773193359375000e+00 8.772416114807128906e-01 0.000000000000000000e+00 9.905625610351562500e+02 7.263973355293273926e-01 1.000000000000000000e+00 1.440204162597656250e+02 -7.575000000000000000e+01 5.925000000000000000e+01
3.000000000000000000e+00 5.438615384615385437e+02 3.416991882324218750e+02 -8.577209472656250000e+00 8.789879679679870605e-01 0.000000000000000000e+00 9.922444458007812500e+02 7.552538514137268066e-01 1.000000000000000000e+00 1.377985076904296875e+02 -7.525000000000000000e+01 5.925000000000000000e+01
2.000000000000000000e+00 5.461692307692306940e+02 3.302122497558593750e+02 -8.708618164062500000e+00 8.658378124237060547e-01 0.000000000000000000e+00 9.900906982421875000e+02 7.400870323181152344e-01 1.000000000000000000e+00 1.484582672119140625e+02 -7.475000000000000000e+01 5.925000000000000000e+01
3.000000000000000000e+00 5.511923076923075087e+02 3.173304748535156250e+02 -8.793029785156250000e+00 9.004983305931091309e-01 0.000000000000000000e+00 9.841014404296875000e+02 8.674294948577880859e-01 1.000000000000000000e+00 2.200731811523437500e+02 -7.425000000000000000e+01 5.925000000000000000e+01
1.000000000000000000e+00 5.540384615384616609e+02 3.033781127929687500e+02 -8.877441406250000000e+00 8.772822022438049316e-01 0.000000000000000000e+00 9.781121215820312500e+02 9.650304913520812988e-01 1.000000000000000000e+00 1.725852661132812500e+02 -7.375000000000000000e+01 5.925000000000000000e+01
9.000000000000000000e+00 5.526153846153848690e+02 2.843845825195312500e+02 -8.961853027343750000e+00 8.697474598884582520e-01 0.000000000000000000e+00 9.721228637695312500e+02 9.669535756111145020e-01 1.000000000000000000e+00 1.512196655273437500e+02 -7.325000000000000000e+01 5.925000000000000000e+01
5.000000000000000000e+00 5.596615384615384983e+02 2.602048645019531250e+02 -8.781555175781250000e+00 8.907994031906127930e-01 0.000000000000000000e+00 9.447847900390625000e+02 8.054287433624267578e-01 1.000000000000000000e+00 2.329594421386718750e+02 -7.225000000000000000e+01 5.925000000000000000e+01
5.000000000000000000e+00 5.614615384615384528e+02 2.570192565917968750e+02 -8.666503906250000000e+00 8.964883089065551758e-01 0.000000000000000000e+00 9.300186767578125000e+02 7.622281908988952637e-01 1.000000000000000000e+00 2.436838531494140625e+02 -7.175000000000000000e+01 5.925000000000000000e+01
1.300000000000000000e+01 5.576999999999998181e+02 2.601038513183593750e+02 -8.551422119140625000e+00 8.897414207458496094e-01 0.000000000000000000e+00 9.152525634765625000e+02 8.579046130180358887e-01 1.000000000000000000e+00 2.444125366210937500e+02 -7.125000000000000000e+01 5.925000000000000000e+01
2.000000000000000000e+00 5.599000000000002046e+02 2.682603149414062500e+02 -8.463439941406250000e+00 8.922569751739501953e-01 0.000000000000000000e+00 8.357491455078125000e+02 7.819635272026062012e-01 1.000000000000000000e+00 2.477858123779296875e+02 -7.075000000000000000e+01 5.925000000000000000e+01
1.000000000000000000e+01 5.502538461538459842e+02 2.774949035644531250e+02 -8.375488281250000000e+00 8.606322407722473145e-01 0.000000000000000000e+00 7.562457275390625000e+02 8.735691308975219727e-01 1.000000000000000000e+00 1.874528961181640625e+02 -7.025000000000000000e+01 5.925000000000000000e+01
8.000000000000000000e+00 5.324538461538460297e+02 2.863941650390625000e+02 -8.287506103515625000e+00 7.910482883453369141e-01 0.000000000000000000e+00 6.767423095703125000e+02 1.012790441513061523e+00 1.000000000000000000e+00 5.614495468139648438e+01 -6.975000000000000000e+01 5.925000000000000000e+01
9.000000000000000000e+00 7.525538461538459387e+02 1.578445281982421875e+02 -6.785461425781250000e+00 9.153401255607604980e-01 0.000000000000000000e+00 5.269805908203125000e+02 6.427252888679504395e-01 1.000000000000000000e+00 4.327893676757812500e+02 -6.475000000000000000e+01 5.925000000000000000e+01
1.000000000000000000e+01 7.823153846153848008e+02 1.368246459960937500e+02 -6.647277832031250000e+00 9.573660492897033691e-01 0.000000000000000000e+00 5.164578247070312500e+02 6.152887344360351562e-01 1.000000000000000000e+00 4.314931945800781250e+02 -6.425000000000000000e+01 5.925000000000000000e+01
3.400000000000000000e+01 3.722461538461539021e+02 2.492139587402343750e+02 -8.435180664062500000e+00 8.524813652038574219e-01 0.000000000000000000e+00 1.242861206054687500e+03 1.204640388488769531e+00 3.000000000000000000e+00 3.128058471679687500e+02 -9.975000000000000000e+01 5.975000000000000000e+01
1.300000000000000000e+01 3.871461538461538225e+02 2.722449645996093750e+02 -8.425476074218750000e+00 8.995563983917236328e-01 0.000000000000000000e+00 1.225429443359375000e+03 1.196800708770751953e+00 1.000000000000000000e+00 3.176500549316406250e+02 -9.825000000000000000e+01 5.975000000000000000e+01
1.800000000000000000e+01 4.073846153846153584e+02 3.087551574707031250e+02 -8.334106445312500000e+00 8.990881443023681641e-01 0.000000000000000000e+00 1.216057861328125000e+03 1.168693065643310547e+00 1.000000000000000000e+00 2.519509429931640625e+02 -9.725000000000000000e+01 5.975000000000000000e+01
2.100000000000000000e+01 4.076999999999999318e+02 3.172451782226562500e+02 -8.255615234375000000e+00 8.907337188720703125e-01 0.000000000000000000e+00 1.209805175781250000e+03 1.159581303596496582e+00 3.000000000000000000e+00 1.959218597412109375e+02 -9.675000000000000000e+01 5.975000000000000000e+01
1.000000000000000000e+01 4.124846153846153811e+02 3.244620056152343750e+02 -8.177124023437500000e+00 8.954099416732788086e-01 0.000000000000000000e+00 1.203552612304687500e+03 1.153686165809631348e+00 1.000000000000000000e+00 1.738996124267578125e+02 -9.625000000000000000e+01 5.975000000000000000e+01
1.900000000000000000e+01 4.109076923076922299e+02 3.328773193359375000e+02 -8.098632812500000000e+00 8.859160542488098145e-01 0.000000000000000000e+00 1.197300048828125000e+03 1.151965379714965820e+00 1.000000000000000000e+00 1.159417266845703125e+02 -9.575000000000000000e+01 5.975000000000000000e+01
1.900000000000000000e+01 4.084384615384615813e+02 3.411221923828125000e+02 -8.096496582031250000e+00 8.793447017669677734e-01 0.000000000000000000e+00 1.135730590820312500e+03 1.158854126930236816e+00 1.000000000000000000e+00 7.050101470947265625e+01 -9.525000000000000000e+01 5.975000000000000000e+01
1.000000000000000000e+00 4.902384615384616495e+02 3.563610229492187500e+02 -8.292633056640625000e+00 8.907043933868408203e-01 0.000000000000000000e+00 9.088676147460937500e+02 7.219622731208801270e-01 1.000000000000000000e+00 3.817345046997070312e+01 -7.725000000000000000e+01 5.975000000000000000e+01
1.000000000000000000e+00 5.070769230769232081e+02 3.535330200195312500e+02 -8.508666992187500000e+00 9.129576086997985840e-01 0.000000000000000000e+00 9.470072631835937500e+02 7.091060280799865723e-01 1.000000000000000000e+00 1.094699630737304688e+02 -7.675000000000000000e+01 5.975000000000000000e+01
3.000000000000000000e+00 5.139923076923076906e+02 3.479279479980468750e+02 -8.704925537109375000e+00 9.078615903854370117e-01 0.000000000000000000e+00 9.454429321289062500e+02 7.037653923034667969e-01 1.000000000000000000e+00 1.160218200683593750e+02 -7.625000000000000000e+01 5.975000000000000000e+01
2.000000000000000000e+00 5.180923076923074859e+02 3.387710876464843750e+02 -8.901184082031250000e+00 9.099771380424499512e-01 0.000000000000000000e+00 9.438785400390625000e+02 7.048624753952026367e-01 1.000000000000000000e+00 1.543742523193359375e+02 -7.575000000000000000e+01 5.975000000000000000e+01
0.000000000000000000e+00 5.215538461538460524e+02 3.257198486328125000e+02 -9.097473144531250000e+00 9.044165611267089844e-01 0.000000000000000000e+00 9.423142089843750000e+02 7.079485058784484863e-01 1.000000000000000000e+00 1.530891113281250000e+02 -7.525000000000000000e+01 5.975000000000000000e+01
2.000000000000000000e+00 5.341384615384617973e+02 2.403454132080078125e+02 -9.435852050781250000e+00 9.259156584739685059e-01 0.000000000000000000e+00 9.146382446289062500e+02 7.529543638229370117e-01 1.000000000000000000e+00 2.277849731445312500e+02 -7.325000000000000000e+01 5.975000000000000000e+01
3.000000000000000000e+00 5.218230769230769965e+02 2.275496673583984375e+02 -9.334167480468750000e+00 9.012376070022583008e-01 0.000000000000000000e+00 9.013645019531250000e+02 8.038607239723205566e-01 1.000000000000000000e+00 2.013024902343750000e+02 -7.275000000000000000e+01 5.975000000000000000e+01
1.500000000000000000e+01 5.249615384615385665e+02 2.154606170654296875e+02 -9.175689697265625000e+00 9.293516278266906738e-01 0.000000000000000000e+00 8.862275390625000000e+02 7.045484781265258789e-01 1.000000000000000000e+00 2.632613220214843750e+02 -7.225000000000000000e+01 5.975000000000000000e+01
3.000000000000000000e+00 5.261230769230768374e+02 2.120823974609375000e+02 -9.017211914062500000e+00 9.057322144508361816e-01 0.000000000000000000e+00 8.710905761718750000e+02 7.023028135299682617e-01 1.000000000000000000e+00 2.000536651611328125e+02 -7.175000000000000000e+01 5.975000000000000000e+01
2.000000000000000000e+00 5.262538461538463253e+02 2.128694000244140625e+02 -8.858734130859375000e+00 9.058945775032043457e-01 0.000000000000000000e+00 8.559535522460937500e+02 7.794571518898010254e-01 1.000000000000000000e+00 2.092599487304687500e+02 -7.125000000000000000e+01 5.975000000000000000e+01
5.000000000000000000e+00 5.174461538461538339e+02 2.161919097900390625e+02 -8.758087158203125000e+00 8.894676566123962402e-01 0.000000000000000000e+00 7.492512207031250000e+02 7.151114344596862793e-01 1.000000000000000000e+00 1.711533203125000000e+02 -7.075000000000000000e+01 5.975000000000000000e+01
6.000000000000000000e+00 5.164615384615383391e+02 2.218251037597656250e+02 -8.657440185546875000e+00 8.789837956428527832e-01 0.000000000000000000e+00 6.425488891601562500e+02 8.718790411949157715e-01 1.000000000000000000e+00 1.417284698486328125e+02 -7.025000000000000000e+01 5.975000000000000000e+01
9.000000000000000000e+00 7.075000000000000000e+02 1.434066009521484375e+02 -6.827514648437500000e+00 8.711231946945190430e-01 0.000000000000000000e+00 4.123960876464843750e+02 6.488906741142272949e-01 1.000000000000000000e+00 2.165248870849609375e+02 -6.475000000000000000e+01 5.975000000000000000e+01
9.000000000000000000e+00 3.611923076923077360e+02 2.310338592529296875e+02 -9.028503417968750000e+00 9.079027175903320312e-01 0.000000000000000000e+00 1.175383544921875000e+03 9.099647402763366699e-01 1.000000000000000000e+00 2.871124877929687500e+02 -9.925000000000000000e+01 6.025000000000000000e+01
8.000000000000000000e+00 3.649230769230769056e+02 2.363700714111328125e+02 -8.971618652343750000e+00 9.184125065803527832e-01 0.000000000000000000e+00 1.173083984375000000e+03 8.996401429176330566e-01 1.000000000000000000e+00 2.964328613281250000e+02 -9.875000000000000000e+01 6.025000000000000000e+01
1.500000000000000000e+01 3.676538461538462457e+02 2.487026977539062500e+02 -8.914703369140625000e+00 9.196573495864868164e-01 0.000000000000000000e+00 1.170784423828125000e+03 9.968387484550476074e-01 1.000000000000000000e+00 2.786199645996093750e+02 -9.825000000000000000e+01 6.025000000000000000e+01
1.500000000000000000e+01 3.701769230769231740e+02 2.646058959960937500e+02 -8.857818603515625000e+00 9.101607799530029297e-01 0.000000000000000000e+00 1.168484741210937500e+03 1.165746569633483887e+00 1.000000000000000000e+00 2.064520263671875000e+02 -9.775000000000000000e+01 6.025000000000000000e+01
1.100000000000000000e+01 3.714461538461538339e+02 2.791310119628906250e+02 -8.785675048828125000e+00 9.046074748039245605e-01 0.000000000000000000e+00 1.164565551757812500e+03 1.159370899200439453e+00 1.000000000000000000e+00 1.580728607177734375e+02 -9.725000000000000000e+01 6.025000000000000000e+01
9.000000000000000000e+00 3.867230769230769170e+02 3.146377258300781250e+02 -8.523559570312500000e+00 9.120739102363586426e-01 0.000000000000000000e+00 1.147948974609375000e+03 1.129336357116699219e+00 1.000000000000000000e+00 9.518626403808593750e+01 -9.575000000000000000e+01 6.025000000000000000e+01
6.000000000000000000e+00 4.955076923076920821e+02 3.407890930175781250e+02 -9.031005859375000000e+00 9.168376922607421875e-01 0.000000000000000000e+00 8.953015136718750000e+02 6.948735713958740234e-01 1.000000000000000000e+00 4.185415267944335938e+01 -7.675000000000000000e+01 6.025000000000000000e+01
3.000000000000000000e+00 5.027923076923076451e+02 3.186157531738281250e+02 -9.436187744140625000e+00 9.316000938415527344e-01 0.000000000000000000e+00 8.868742675781250000e+02 6.847957968711853027e-01 1.000000000000000000e+00 1.537046661376953125e+02 -7.575000000000000000e+01 6.025000000000000000e+01
1.000000000000000000e+00 5.022692307692306031e+02 3.005911560058593750e+02 -9.638763427734375000e+00 9.307314753532409668e-01 0.000000000000000000e+00 8.826606445312500000e+02 6.778691411018371582e-01 1.000000000000000000e+00 1.468100738525390625e+02 -7.525000000000000000e+01 6.025000000000000000e+01
1.000000000000000000e+01 5.122461538461540158e+02 2.774055786132812500e+02 -9.740173339843750000e+00 9.477792978286743164e-01 0.000000000000000000e+00 8.775868530273437500e+02 6.621242165565490723e-01 1.000000000000000000e+00 2.192637634277343750e+02 -7.475000000000000000e+01 6.025000000000000000e+01
1.000000000000000000e+00 5.136923076923077360e+02 2.206556091308593750e+02 -9.740600585937500000e+00 9.412844777107238770e-01 0.000000000000000000e+00 8.657189941406250000e+02 6.560006737709045410e-01 1.000000000000000000e+00 2.097080688476562500e+02 -7.375000000000000000e+01 6.025000000000000000e+01
4.000000000000000000e+00 5.139769230769231854e+02 1.972031707763671875e+02 -9.740844726562500000e+00 9.527059197425842285e-01 0.000000000000000000e+00 8.597850341796875000e+02 6.552898287773132324e-01 1.000000000000000000e+00 2.690091857910156250e+02 -7.325000000000000000e+01 6.025000000000000000e+01
2.000000000000000000e+00 5.070384615384613767e+02 1.852625274658203125e+02 -9.626373291015625000e+00 9.294567108154296875e-01 0.000000000000000000e+00 8.377058105468750000e+02 6.599713563919067383e-01 1.000000000000000000e+00 1.805874328613281250e+02 -7.275000000000000000e+01 6.025000000000000000e+01
2.000000000000000000e+00 5.005846153846153470e+02 1.743367767333984375e+02 -9.473693847656250000e+00 9.315778017044067383e-01 0.000000000000000000e+00 8.102448730468750000e+02 6.704788804054260254e-01 1.000000000000000000e+00 2.199779052734375000e+02 -7.225000000000000000e+01 6.025000000000000000e+01
7.000000000000000000e+00 4.960846153846151765e+02 1.712310791015625000e+02 -9.320983886718750000e+00 9.082038998603820801e-01 0.000000000000000000e+00 7.827838745117187500e+02 6.711744070053100586e-01 1.000000000000000000e+00 1.436017456054687500e+02 -7.175000000000000000e+01 6.025000000000000000e+01
9.000000000000000000e+00 4.929769230769230717e+02 1.709663391113281250e+02 -9.168304443359375000e+00 9.181748628616333008e-01 0.000000000000000000e+00 7.553229370117187500e+02 6.664223074913024902e-01 1.000000000000000000e+00 1.891547851562500000e+02 -7.125000000000000000e+01 6.025000000000000000e+01
2.000000000000000000e+00 3.339615384615384528e+02 2.317886352539062500e+02 -9.570404052734375000e+00 9.498723745346069336e-01 0.000000000000000000e+00 1.135984375000000000e+03 8.924933075904846191e-01 1.000000000000000000e+00 3.342958984375000000e+02 -9.975000000000000000e+01 6.075000000000000000e+01
1.300000000000000000e+01 3.481846153846153697e+02 2.370810394287109375e+02 -9.538665771484375000e+00 9.394873380661010742e-01 0.000000000000000000e+00 1.130862426757812500e+03 1.007261276245117188e+00 1.000000000000000000e+00 2.728189697265625000e+02 -9.875000000000000000e+01 6.075000000000000000e+01
1.400000000000000000e+01 3.533076923076923208e+02 2.518653106689453125e+02 -9.326721191406250000e+00 9.392645359039306641e-01 0.000000000000000000e+00 1.126769042968750000e+03 1.135020375251770020e+00 1.000000000000000000e+00 1.721869201660156250e+02 -9.725000000000000000e+01 6.075000000000000000e+01
8.000000000000000000e+00 3.605846153846154039e+02 2.614401855468750000e+02 -9.240295410156250000e+00 9.410665631294250488e-01 0.000000000000000000e+00 1.121258056640625000e+03 1.122920393943786621e+00 1.000000000000000000e+00 1.539809570312500000e+02 -9.675000000000000000e+01 6.075000000000000000e+01
1.100000000000000000e+01 3.657307692307692264e+02 2.710796203613281250e+02 -9.153869628906250000e+00 9.422203302383422852e-01 0.000000000000000000e+00 1.115746948242187500e+03 1.107884764671325684e+00 1.000000000000000000e+00 1.224634628295898438e+02 -9.625000000000000000e+01 6.075000000000000000e+01
6.000000000000000000e+00 3.661769230769230035e+02 2.810213012695312500e+02 -9.067443847656250000e+00 9.371404647827148438e-01 0.000000000000000000e+00 1.110235961914062500e+03 1.097368836402893066e+00 1.000000000000000000e+00 9.673062133789062500e+01 -9.575000000000000000e+01 6.075000000000000000e+01
9.000000000000000000e+00 3.578230769230769965e+02 2.881872863769531250e+02 -9.051788330078125000e+00 9.374214410781860352e-01 0.000000000000000000e+00 1.064428588867187500e+03 1.092656731605529785e+00 1.000000000000000000e+00 5.212133407592773438e+01 -9.525000000000000000e+01 6.075000000000000000e+01
1.100000000000000000e+01 4.789846153846152106e+02 3.297016601562500000e+02 -9.345611572265625000e+00 9.340439438819885254e-01 0.000000000000000000e+00 8.023585815429687500e+02 6.850512623786926270e-01 1.000000000000000000e+00 2.771309661865234375e+01 -7.725000000000000000e+01 6.075000000000000000e+01
6.000000000000000000e+00 4.883461538461540385e+02 3.240199890136718750e+02 -9.608306884765625000e+00 9.454435706138610840e-01 0.000000000000000000e+00 8.322097167968750000e+02 6.714853644371032715e-01 1.000000000000000000e+00 1.146541519165039062e+02 -7.675000000000000000e+01 6.075000000000000000e+01
2.000000000000000000e+00 4.907615384615384073e+02 3.130156250000000000e+02 -9.805816650390625000e+00 9.511873722076416016e-01 0.000000000000000000e+00 8.259371948242187500e+02 6.576474905014038086e-01 1.000000000000000000e+00 1.624010925292968750e+02 -7.625000000000000000e+01 6.075000000000000000e+01
0.000000000000000000e+00 4.989153846153846530e+02 2.949706115722656250e+02 -1.000335693359375000e+01 9.538940787315368652e-01 0.000000000000000000e+00 8.196646118164062500e+02 6.449723839759826660e-01 1.000000000000000000e+00 1.644809417724609375e+02 -7.575000000000000000e+01 6.075000000000000000e+01
5.000000000000000000e+00 5.046076923076922753e+02 2.378188629150390625e+02 -1.023947143554687500e+01 9.601421356201171875e-01 0.000000000000000000e+00 8.098669433593750000e+02 6.211616396903991699e-01 1.000000000000000000e+00 2.616252441406250000e+02 -7.475000000000000000e+01 6.075000000000000000e+01
8.000000000000000000e+00 5.072230769230770875e+02 2.068632812500000000e+02 -1.011920166015625000e+01 9.676154851913452148e-01 0.000000000000000000e+00 8.090892944335937500e+02 6.138157248497009277e-01 1.000000000000000000e+00 3.039759826660156250e+02 -7.425000000000000000e+01 6.075000000000000000e+01
2.000000000000000000e+00 5.015000000000001137e+02 1.773403015136718750e+02 -9.998931884765625000e+00 9.674398899078369141e-01 0.000000000000000000e+00 8.083115844726562500e+02 6.071472764015197754e-01 1.000000000000000000e+00 3.072793579101562500e+02 -7.375000000000000000e+01 6.075000000000000000e+01
1.000000000000000000e+00 5.118384615384615586e+02 1.571071014404296875e+02 -9.878662109375000000e+00 9.718317389488220215e-01 0.000000000000000000e+00 8.075339355468750000e+02 5.930888056755065918e-01 1.000000000000000000e+00 3.343541259765625000e+02 -7.325000000000000000e+01 6.075000000000000000e+01
1.000000000000000000e+00 5.070692307692306144e+02 1.491295623779296875e+02 -9.774902343750000000e+00 9.663316011428833008e-01 0.000000000000000000e+00 7.686358032226562500e+02 5.926620960235595703e-01 1.000000000000000000e+00 3.145113220214843750e+02 -7.275000000000000000e+01 6.075000000000000000e+01
1.000000000000000000e+00 5.010461538461537430e+02 1.434151916503906250e+02 -9.676635742187500000e+00 9.662674665451049805e-01 0.000000000000000000e+00 7.170308837890625000e+02 5.973147153854370117e-01 1.000000000000000000e+00 3.256410522460937500e+02 -7.225000000000000000e+01 6.075000000000000000e+01
3.000000000000000000e+00 4.879846153846153243e+02 1.389782867431640625e+02 -9.480133056640625000e+00 9.628269076347351074e-01 0.000000000000000000e+00 6.138209838867187500e+02 6.004561185836791992e-01 1.000000000000000000e+00 3.465426025390625000e+02 -7.125000000000000000e+01 6.075000000000000000e+01
0.000000000000000000e+00 4.800538461538458819e+02 1.379164581298828125e+02 -9.288116455078125000e+00 9.581650495529174805e-01 0.000000000000000000e+00 5.432882690429687500e+02 6.069548130035400391e-01 1.000000000000000000e+00 3.101332702636718750e+02 -7.075000000000000000e+01 6.075000000000000000e+01
1.100000000000000000e+01 3.287153846153845507e+02 2.313594970703125000e+02 -1.018377685546875000e+01 9.606368541717529297e-01 0.000000000000000000e+00 1.087411376953125000e+03 1.088151931762695312e+00 1.000000000000000000e+00 2.958907165527343750e+02 -9.925000000000000000e+01 6.125000000000000000e+01
1.500000000000000000e+01 3.341923076923076792e+02 2.279950256347656250e+02 -9.949554443359375000e+00 9.591773152351379395e-01 0.000000000000000000e+00 1.091099487304687500e+03 1.111696600914001465e+00 1.000000000000000000e+00 1.906483459472656250e+02 -9.775000000000000000e+01 6.125000000000000000e+01
1.100000000000000000e+01 3.434769230769230148e+02 2.254049835205078125e+02 -9.782287597656250000e+00 9.641082882881164551e-01 0.000000000000000000e+00 1.083489379882812500e+03 1.093860864639282227e+00 1.000000000000000000e+00 1.717577972412109375e+02 -9.675000000000000000e+01 6.125000000000000000e+01
1.200000000000000000e+01 3.451461538461538225e+02 2.294841308593750000e+02 -9.611358642578125000e+00 9.632191061973571777e-01 0.000000000000000000e+00 1.072522949218750000e+03 1.070580363273620605e+00 1.000000000000000000e+00 1.174882736206054688e+02 -9.575000000000000000e+01 6.125000000000000000e+01
1.300000000000000000e+01 3.453692307692308532e+02 2.335024108886718750e+02 -9.577697753906250000e+00 9.629565477371215820e-01 0.000000000000000000e+00 1.042284179687500000e+03 1.058423161506652832e+00 1.000000000000000000e+00 7.647672271728515625e+01 -9.525000000000000000e+01 6.125000000000000000e+01
[truncated: 135,901 more chars]
