# Supplementary material for: Environmental Conditions for Alternative Tree Cover States in HighLatitudes
Source: Copernicus journal article supplement (doi:10.5194/bg-2016-401), 2016-10-11
Supplement: Supplementary file 4 [file bg-2016-401-supplement.zip › Analysis/files_to_load_and_import/boreal_na_east_database_canadianupdate_without_soiltexture.txt]

4.000000000000000000e+00 5.469692307692309896e+02 2.696683959960939774e+02 4.655456542968750000e+00 0.000000000000000000e+00 0.000000000000000000e+00 3.319161132812500000e+03 3.937541961669920099e+00 1.000000000000000000e+00 5.045122680664060226e+02 -9.925000000000000000e+01 4.525000000000000000e+01
5.000000000000000000e+00 5.794153846153850509e+02 2.693516540527339771e+02 4.622741699218750000e+00 0.000000000000000000e+00 2.941176593303679865e-01 3.318472656250000000e+03 3.930151700973509854e+00 1.000000000000000000e+00 4.106708374023439774e+02 -9.875000000000000000e+01 4.525000000000000000e+01
6.300000000000000000e+01 7.743615384615379753e+02 3.431378784179689774e+02 3.908905029296879885e+00 0.000000000000000000e+00 0.000000000000000000e+00 3.129231445312500000e+03 3.970267772674560103e+00 4.000000000000000000e+00 2.857077331542969887e+02 -9.275000000000000000e+01 4.525000000000000000e+01
5.800000000000000000e+01 7.926076923076930143e+02 3.855066223144530113e+02 4.164611816406250000e+00 0.000000000000000000e+00 0.000000000000000000e+00 3.121708740234380002e+03 3.830453872680660066e+00 4.000000000000000000e+00 3.564528503417969887e+02 -9.125000000000000000e+01 4.525000000000000000e+01
4.900000000000000000e+01 7.869846153846150401e+02 4.076825256347660229e+02 4.352508544921880329e+00 0.000000000000000000e+00 0.000000000000000000e+00 3.126727050781250000e+03 3.089573383331300160e+00 4.000000000000000000e+00 3.954749450683589771e+02 -9.075000000000000000e+01 4.525000000000000000e+01
2.900000000000000000e+01 8.114384615384609560e+02 3.798137207031250000e+02 4.540374755859380329e+00 0.000000000000000000e+00 0.000000000000000000e+00 3.131396728515619998e+03 2.515947341918950197e+00 3.000000000000000000e+00 4.708270568847660229e+02 -9.025000000000000000e+01 4.525000000000000000e+01
5.700000000000000000e+01 8.001538461538459615e+02 3.764568786621089771e+02 4.750457763671880329e+00 0.000000000000000000e+00 0.000000000000000000e+00 3.019171386718750000e+03 3.596126317977910158e+00 4.000000000000000000e+00 4.281541442871089771e+02 -8.975000000000000000e+01 4.525000000000000000e+01
5.400000000000000000e+01 7.713999999999999773e+02 3.666658630371089771e+02 4.982727050781250000e+00 0.000000000000000000e+00 0.000000000000000000e+00 3.007521240234380002e+03 3.567088603973390004e+00 4.000000000000000000e+00 4.698607482910160229e+02 -8.925000000000000000e+01 4.525000000000000000e+01
6.000000000000000000e+01 7.464153846153840277e+02 3.977831420898439774e+02 5.215026855468750000e+00 0.000000000000000000e+00 0.000000000000000000e+00 2.991324707031250000e+03 3.337230920791629973e+00 4.000000000000000000e+00 4.423210144042969887e+02 -8.875000000000000000e+01 4.525000000000000000e+01
5.600000000000000000e+01 7.732615384615389758e+02 4.053438110351560226e+02 5.447296142578119671e+00 0.000000000000000000e+00 0.000000000000000000e+00 2.970255859375000000e+03 3.600231170654299984e+00 4.000000000000000000e+00 2.781997070312500000e+02 -8.825000000000000000e+01 4.525000000000000000e+01
5.300000000000000000e+01 7.809307692307689877e+02 3.964680175781250000e+02 5.494354248046880329e+00 0.000000000000000000e+00 0.000000000000000000e+00 2.918769775390619998e+03 3.755231857299799803e+00 4.000000000000000000e+00 2.068406524658199999e+02 -8.775000000000000000e+01 4.525000000000000000e+01
2.500000000000000000e+01 8.282461538461540158e+02 4.094894409179689774e+02 4.965698242187500000e+00 0.000000000000000000e+00 0.000000000000000000e+00 2.729503662109380002e+03 9.606044292449950062e-01 3.000000000000000000e+00 2.503367614746090055e+02 -8.425000000000000000e+01 4.525000000000000000e+01
6.900000000000000000e+01 1.086284615384620110e+03 3.840179748535160229e+02 3.721343994140620115e+00 0.000000000000000000e+00 0.000000000000000000e+00 2.717351074218750000e+03 9.614879488945009545e-01 4.000000000000000000e+00 2.606470031738280113e+02 -7.975000000000000000e+01 4.525000000000000000e+01
5.600000000000000000e+01 1.018969230769229966e+03 3.397614135742189774e+02 3.503753662109379885e+00 0.000000000000000000e+00 0.000000000000000000e+00 2.712248046875000000e+03 9.450535774230960362e-01 4.000000000000000000e+00 3.092456970214839771e+02 -7.925000000000000000e+01 4.525000000000000000e+01
6.700000000000000000e+01 9.966153846153849827e+02 3.889110412597660229e+02 3.216308593750000000e+00 0.000000000000000000e+00 0.000000000000000000e+00 2.661257812500000000e+03 9.163748621940609462e-01 4.000000000000000000e+00 4.441153259277339771e+02 -7.825000000000000000e+01 4.525000000000000000e+01
5.900000000000000000e+01 8.734846153846150401e+02 4.055255737304689774e+02 3.146484375000000000e+00 0.000000000000000000e+00 0.000000000000000000e+00 2.655050292968750000e+03 9.268832206726069778e-01 4.000000000000000000e+00 3.429736633300780113e+02 -7.775000000000000000e+01 4.525000000000000000e+01
6.600000000000000000e+01 8.759692307692309896e+02 3.794761352539060226e+02 3.076629638671879885e+00 0.000000000000000000e+00 0.000000000000000000e+00 2.648684570312500000e+03 9.418959021568299450e-01 4.000000000000000000e+00 3.086385498046880116e+02 -7.725000000000000000e+01 4.525000000000000000e+01
1.400000000000000000e+01 8.058384615384619565e+02 4.213399047851560226e+02 2.866485595703120115e+00 0.000000000000000000e+00 0.000000000000000000e+00 2.587696533203119998e+03 9.722930788993839890e-01 1.000000000000000000e+00 1.203653717041020030e+02 -7.625000000000000000e+01 4.525000000000000000e+01
1.400000000000000000e+01 9.248384615384610470e+02 4.829685974121089771e+02 2.740264892578120115e+00 0.000000000000000000e+00 0.000000000000000000e+00 2.579760253906250000e+03 1.429997086524960048e+00 1.000000000000000000e+00 9.532123565673829546e+01 -7.575000000000000000e+01 4.525000000000000000e+01
5.300000000000000000e+01 1.008000000000000000e+03 4.910429077148439774e+02 2.500915527343750000e+00 0.000000000000000000e+00 2.941176593303679865e-01 2.518484375000000000e+03 1.247510671615599920e+00 4.000000000000000000e+00 9.516970062255859375e+01 -7.475000000000000000e+01 4.525000000000000000e+01
5.100000000000000000e+01 1.197900000000000091e+03 5.579771118164060226e+02 2.170196533203120115e+00 0.000000000000000000e+00 2.941176593303679865e-01 2.463142578125000000e+03 9.503039121627809838e-01 4.000000000000000000e+00 1.238608398437500000e+02 -7.275000000000000000e+01 4.525000000000000000e+01
7.100000000000000000e+01 1.194061538461540067e+03 5.882686157226560226e+02 2.162841796875000000e+00 0.000000000000000000e+00 0.000000000000000000e+00 2.459522949218750000e+03 9.345657229423519619e-01 4.000000000000000000e+00 2.760216064453119884e+02 -7.225000000000000000e+01 4.525000000000000000e+01
4.000000000000000000e+01 1.216700000000000045e+03 5.370006713867189774e+02 2.155487060546879885e+00 0.000000000000000000e+00 0.000000000000000000e+00 2.456590820312500000e+03 9.169288277626039818e-01 3.000000000000000000e+00 3.017593383789060226e+02 -7.175000000000000000e+01 4.525000000000000000e+01
6.700000000000000000e+01 1.350184615384619974e+03 5.436701049804689774e+02 2.148101806640620115e+00 0.000000000000000000e+00 0.000000000000000000e+00 2.454624267578119998e+03 8.948280215263370030e-01 4.000000000000000000e+00 6.895606079101560226e+02 -7.125000000000000000e+01 4.525000000000000000e+01
6.600000000000000000e+01 1.358453846153850009e+03 5.435772705078120453e+02 2.265899658203120115e+00 0.000000000000000000e+00 0.000000000000000000e+00 2.464870605468750000e+03 8.719891309738160290e-01 4.000000000000000000e+00 7.850031127929689774e+02 -7.075000000000000000e+01 4.525000000000000000e+01
4.600000000000000000e+01 1.324423076923080089e+03 5.447482299804689774e+02 2.383666992187500000e+00 0.000000000000000000e+00 0.000000000000000000e+00 2.468903076171880002e+03 8.708035349845889561e-01 4.000000000000000000e+00 3.980151672363280113e+02 -7.025000000000000000e+01 4.525000000000000000e+01
6.000000000000000000e+01 1.257876923076920093e+03 5.699851684570310226e+02 2.642333984375000000e+00 0.000000000000000000e+00 0.000000000000000000e+00 2.526920166015619998e+03 8.966609239578250401e-01 4.000000000000000000e+00 1.707548370361330115e+02 -6.925000000000000000e+01 4.525000000000000000e+01
5.600000000000000000e+01 1.142269230769230035e+03 5.576562500000000000e+02 2.852600097656250000e+00 0.000000000000000000e+00 0.000000000000000000e+00 2.537119873046880002e+03 9.199827909469600051e-01 4.000000000000000000e+00 9.235324096679690342e+01 -6.875000000000000000e+01 4.525000000000000000e+01
6.300000000000000000e+01 1.204276923076919957e+03 5.690910034179689774e+02 3.062866210937500000e+00 0.000000000000000000e+00 0.000000000000000000e+00 2.548357666015619998e+03 9.193690419197080299e-01 4.000000000000000000e+00 9.380888366699220171e+01 -6.825000000000000000e+01 4.525000000000000000e+01
6.200000000000000000e+01 1.289069230769229989e+03 5.843118286132810226e+02 3.273132324218750000e+00 0.000000000000000000e+00 0.000000000000000000e+00 2.559870361328119998e+03 1.374963521957399903e+00 4.000000000000000000e+00 1.009424133300779971e+02 -6.775000000000000000e+01 4.525000000000000000e+01
6.400000000000000000e+01 1.369376923076920093e+03 5.764167480468750000e+02 3.528778076171879885e+00 0.000000000000000000e+00 0.000000000000000000e+00 2.586782714843750000e+03 2.262581348419189897e+00 4.000000000000000000e+00 9.084842681884769888e+01 -6.725000000000000000e+01 4.525000000000000000e+01
3.400000000000000000e+01 1.241907692307690013e+03 5.323687133789060226e+02 5.638488769531250000e+00 0.000000000000000000e+00 0.000000000000000000e+00 2.561031005859380002e+03 1.991263747215270108e+00 3.000000000000000000e+00 7.335133361816410513e+01 -6.325000000000000000e+01 4.525000000000000000e+01
4.100000000000000000e+01 1.377430769230770011e+03 5.069645080566410229e+02 5.875183105468750000e+00 0.000000000000000000e+00 0.000000000000000000e+00 2.554607177734380002e+03 2.198659420013429955e+00 3.000000000000000000e+00 2.026185760498050001e+02 -6.275000000000000000e+01 4.525000000000000000e+01
4.000000000000000000e+00 4.858384615384620133e+02 2.338948974609380116e+02 4.350097656250000000e+00 0.000000000000000000e+00 0.000000000000000000e+00 3.336635986328119998e+03 3.883026599884030095e+00 1.000000000000000000e+00 5.648046264648439774e+02 -9.975000000000000000e+01 4.575000000000000000e+01
6.000000000000000000e+00 5.261384615384620247e+02 2.595296325683589771e+02 4.365753173828119671e+00 0.000000000000000000e+00 0.000000000000000000e+00 3.323647216796880002e+03 3.879936933517460051e+00 1.000000000000000000e+00 5.911144409179689774e+02 -9.925000000000000000e+01 4.575000000000000000e+01
3.000000000000000000e+00 5.776769230769230035e+02 2.889544372558589771e+02 4.324340820312500000e+00 0.000000000000000000e+00 3.529411852359770063e-01 3.321112792968750000e+03 3.882982492446899858e+00 1.000000000000000000e+00 3.921739807128910229e+02 -9.825000000000000000e+01 4.575000000000000000e+01
5.500000000000000000e+01 7.190230769230770420e+02 3.119446411132810226e+02 3.655761718750000000e+00 0.000000000000000000e+00 2.941176593303679865e-01 3.179280029296880002e+03 3.858378171920779920e+00 4.000000000000000000e+00 3.810711364746089771e+02 -9.475000000000000000e+01 4.575000000000000000e+01
4.000000000000000000e+01 7.591461538461539931e+02 3.280381469726560226e+02 3.474639892578120115e+00 0.000000000000000000e+00 0.000000000000000000e+00 3.122530517578119998e+03 3.891089677810669833e+00 3.000000000000000000e+00 2.705220947265619884e+02 -9.275000000000000000e+01 4.575000000000000000e+01
4.500000000000000000e+01 7.576230769230769511e+02 3.445300903320310226e+02 3.486785888671879885e+00 0.000000000000000000e+00 0.000000000000000000e+00 3.120168457031250000e+03 3.837877273559569868e+00 4.000000000000000000e+00 3.208588256835939774e+02 -9.225000000000000000e+01 4.575000000000000000e+01
5.800000000000000000e+01 7.552846153846149946e+02 3.723968811035160229e+02 3.550445556640620115e+00 0.000000000000000000e+00 0.000000000000000000e+00 3.111820312500000000e+03 3.353128671646119940e+00 4.000000000000000000e+00 3.933424072265619884e+02 -9.175000000000000000e+01 4.575000000000000000e+01
4.400000000000000000e+01 7.529076923076919456e+02 3.768558959960939774e+02 3.768646240234379885e+00 0.000000000000000000e+00 0.000000000000000000e+00 3.119025146484380002e+03 1.885235667228700063e+00 3.000000000000000000e+00 3.856524658203119884e+02 -9.125000000000000000e+01 4.575000000000000000e+01
4.500000000000000000e+01 7.990461538461539703e+02 3.642040405273439774e+02 4.205078125000000000e+00 0.000000000000000000e+00 0.000000000000000000e+00 3.136117431640619998e+03 3.561506986618040216e+00 4.000000000000000000e+00 4.685121459960939774e+02 -9.025000000000000000e+01 4.575000000000000000e+01
4.800000000000000000e+01 7.805615384615380208e+02 3.609486694335939774e+02 4.426300048828119671e+00 0.000000000000000000e+00 0.000000000000000000e+00 3.043817871093750000e+03 2.319310426712040130e+00 4.000000000000000000e+00 4.818140563964839771e+02 -8.975000000000000000e+01 4.575000000000000000e+01
4.700000000000000000e+01 7.530615384615390440e+02 3.853658447265619884e+02 4.650543212890619671e+00 0.000000000000000000e+00 0.000000000000000000e+00 3.030002685546880002e+03 1.462739467620850053e+00 4.000000000000000000e+00 5.006720581054689774e+02 -8.925000000000000000e+01 4.575000000000000000e+01
6.100000000000000000e+01 7.186230769230769511e+02 3.974042968750000000e+02 4.874786376953119671e+00 0.000000000000000000e+00 0.000000000000000000e+00 3.011453613281250000e+03 9.159872531890870251e-01 4.000000000000000000e+00 4.835430297851560226e+02 -8.875000000000000000e+01 4.575000000000000000e+01
5.400000000000000000e+01 7.572000000000000455e+02 3.810452880859380116e+02 5.099029541015619671e+00 0.000000000000000000e+00 0.000000000000000000e+00 2.986979492187500000e+03 9.417324662208560460e-01 4.000000000000000000e+00 3.952954101562500000e+02 -8.825000000000000000e+01 4.575000000000000000e+01
1.800000000000000000e+01 7.932000000000000455e+02 3.751127014160160229e+02 5.130889892578119671e+00 0.000000000000000000e+00 0.000000000000000000e+00 2.929010253906250000e+03 9.597558379173279919e-01 1.000000000000000000e+00 2.927509765625000000e+02 -8.775000000000000000e+01 4.575000000000000000e+01
5.400000000000000000e+01 9.981384615384610015e+02 3.966619567871089771e+02 3.103057861328120115e+00 0.000000000000000000e+00 0.000000000000000000e+00 2.724597656250000000e+03 9.514601230621340111e-01 4.000000000000000000e+00 2.296415710449219887e+02 -8.025000000000000000e+01 4.575000000000000000e+01
6.100000000000000000e+01 1.058207692307689967e+03 4.118653564453119884e+02 2.948486328125000000e+00 0.000000000000000000e+00 2.352941185235979948e-01 2.717898925781250000e+03 9.381765723228450149e-01 4.000000000000000000e+00 3.042209472656250000e+02 -7.975000000000000000e+01 4.575000000000000000e+01
6.300000000000000000e+01 1.029430769230770011e+03 4.143117065429689774e+02 2.793914794921879885e+00 0.000000000000000000e+00 0.000000000000000000e+00 2.711020263671880002e+03 9.151687622070310280e-01 4.000000000000000000e+00 4.207136230468750000e+02 -7.925000000000000000e+01 4.575000000000000000e+01
5.100000000000000000e+01 1.054861538461540022e+03 4.191122436523439774e+02 2.639343261718750000e+00 0.000000000000000000e+00 0.000000000000000000e+00 2.704698730468750000e+03 9.019773602485660069e-01 4.000000000000000000e+00 4.522931518554689774e+02 -7.875000000000000000e+01 4.575000000000000000e+01
6.500000000000000000e+01 9.450615384615380208e+02 4.169147338867189774e+02 2.607421875000000000e+00 0.000000000000000000e+00 0.000000000000000000e+00 2.664086914062500000e+03 8.998112678527829811e-01 4.000000000000000000e+00 4.629186096191410229e+02 -7.825000000000000000e+01 4.575000000000000000e+01
5.200000000000000000e+01 8.289538461538460297e+02 3.953965759277339771e+02 2.575531005859379885e+00 0.000000000000000000e+00 0.000000000000000000e+00 2.655693603515619998e+03 9.259387850761410244e-01 4.000000000000000000e+00 2.760239562988280113e+02 -7.775000000000000000e+01 4.575000000000000000e+01
5.500000000000000000e+01 8.382230769230769738e+02 3.843036193847660229e+02 2.543609619140620115e+00 0.000000000000000000e+00 8.235294222831730515e-01 2.647251708984380002e+03 9.459466934204100452e-01 4.000000000000000000e+00 1.865707855224609943e+02 -7.725000000000000000e+01 4.575000000000000000e+01
6.200000000000000000e+01 1.001353846153849986e+03 4.618544921875000000e+02 2.403564453125000000e+00 0.000000000000000000e+00 0.000000000000000000e+00 2.590334960937500000e+03 9.374040365219119542e-01 4.000000000000000000e+00 2.550958709716800001e+02 -7.625000000000000000e+01 4.575000000000000000e+01
6.200000000000000000e+01 1.018653846153850054e+03 5.001443786621089771e+02 2.310668945312500000e+00 0.000000000000000000e+00 0.000000000000000000e+00 2.579305664062500000e+03 9.369126558303829677e-01 4.000000000000000000e+00 2.293017120361330115e+02 -7.575000000000000000e+01 4.575000000000000000e+01
6.000000000000000000e+01 1.052599999999999909e+03 5.129161987304689774e+02 2.217803955078120115e+00 0.000000000000000000e+00 0.000000000000000000e+00 2.568727539062500000e+03 9.300630688667299584e-01 4.000000000000000000e+00 2.563749694824219887e+02 -7.525000000000000000e+01 4.575000000000000000e+01
4.600000000000000000e+01 1.065684615384609970e+03 5.315325927734379547e+02 2.119201660156250000e+00 0.000000000000000000e+00 0.000000000000000000e+00 2.521252929687500000e+03 9.313778281211849697e-01 4.000000000000000000e+00 2.265335540771480112e+02 -7.475000000000000000e+01 4.575000000000000000e+01
6.000000000000000000e+01 1.128153846153850054e+03 5.210023193359379547e+02 2.014862060546879885e+00 0.000000000000000000e+00 0.000000000000000000e+00 2.510943115234380002e+03 1.602787494659420053e+00 4.000000000000000000e+00 2.675225219726560226e+02 -7.425000000000000000e+01 4.575000000000000000e+01
6.300000000000000000e+01 1.084500000000000000e+03 5.034533081054689774e+02 1.910522460937500000e+00 0.000000000000000000e+00 0.000000000000000000e+00 2.500235107421880002e+03 3.415514945983889827e+00 4.000000000000000000e+00 5.585673141479490056e+01 -7.375000000000000000e+01 4.575000000000000000e+01
1.600000000000000000e+01 1.099438461538459933e+03 5.709292602539060226e+02 1.708953857421880107e+00 0.000000000000000000e+00 2.352941185235979948e-01 2.456335449218750000e+03 9.406006336212160424e-01 1.000000000000000000e+00 1.445616149902340055e+02 -7.225000000000000000e+01 4.575000000000000000e+01
3.700000000000000000e+01 1.394092307692309987e+03 5.407262573242189774e+02 1.668304443359380107e+00 0.000000000000000000e+00 0.000000000000000000e+00 2.451965332031250000e+03 9.065047502517700195e-01 3.000000000000000000e+00 2.908373718261719887e+02 -7.175000000000000000e+01 4.575000000000000000e+01
4.800000000000000000e+01 1.377838461538460024e+03 5.204317626953120453e+02 1.627655029296880107e+00 0.000000000000000000e+00 0.000000000000000000e+00 2.449320312500000000e+03 8.933089971542359509e-01 4.000000000000000000e+00 3.527694396972660229e+02 -7.125000000000000000e+01 4.575000000000000000e+01
6.000000000000000000e+01 1.150284615384620110e+03 5.197618408203120453e+02 1.705688476562500000e+00 0.000000000000000000e+00 0.000000000000000000e+00 2.459083984375000000e+03 8.862516283988950416e-01 4.000000000000000000e+00 3.955530090332030113e+02 -7.075000000000000000e+01 4.575000000000000000e+01
6.600000000000000000e+01 1.201423076923080089e+03 5.215807495117189774e+02 1.783752441406250000e+00 0.000000000000000000e+00 0.000000000000000000e+00 2.464739013671880002e+03 8.714466094970699794e-01 4.000000000000000000e+00 5.849837646484379547e+02 -7.025000000000000000e+01 4.575000000000000000e+01
6.800000000000000000e+01 1.205853846153850100e+03 5.560482177734379547e+02 1.971099853515619893e+00 0.000000000000000000e+00 0.000000000000000000e+00 2.517939941406250000e+03 8.839658498764040306e-01 4.000000000000000000e+00 3.532673645019530113e+02 -6.925000000000000000e+01 4.575000000000000000e+01
6.100000000000000000e+01 1.152646153846149900e+03 5.546845092773439774e+02 2.377258300781250000e+00 0.000000000000000000e+00 0.000000000000000000e+00 2.547488525390619998e+03 9.163369536399840198e-01 4.000000000000000000e+00 1.563813781738280113e+02 -6.825000000000000000e+01 4.575000000000000000e+01
6.300000000000000000e+01 1.260115384615379980e+03 5.718708496093750000e+02 2.580352783203120115e+00 0.000000000000000000e+00 0.000000000000000000e+00 2.562993408203119998e+03 9.168884754180910424e-01 4.000000000000000000e+00 1.596933441162109943e+02 -6.775000000000000000e+01 4.575000000000000000e+01
6.500000000000000000e+01 1.327969230769230080e+03 5.392333374023439774e+02 3.176269531250000000e+00 0.000000000000000000e+00 0.000000000000000000e+00 2.600769287109380002e+03 1.735195636749270021e+00 4.000000000000000000e+00 8.172579193115230112e+01 -6.675000000000000000e+01 4.575000000000000000e+01
6.800000000000000000e+01 1.326584615384620065e+03 5.685342407226560226e+02 3.835418701171879885e+00 0.000000000000000000e+00 0.000000000000000000e+00 2.616437255859380002e+03 1.131384134292600097e+00 4.000000000000000000e+00 1.275015487670900001e+02 -6.575000000000000000e+01 4.575000000000000000e+01
3.600000000000000000e+01 1.486915384615379935e+03 5.738226928710939774e+02 4.143218994140619671e+00 0.000000000000000000e+00 0.000000000000000000e+00 2.623920898437500000e+03 8.873152732849119984e-01 3.000000000000000000e+00 2.176613922119140057e+02 -6.525000000000000000e+01 4.575000000000000000e+01
3.300000000000000000e+01 6.989307692307689877e+02 3.186767578125000000e+02 3.267181396484379885e+00 0.000000000000000000e+00 0.000000000000000000e+00 3.177931884765619998e+03 3.805998563766479936e+00 3.000000000000000000e+00 3.863222045898439774e+02 -9.475000000000000000e+01 4.625000000000000000e+01
2.800000000000000000e+01 7.173384615384619565e+02 3.388679504394530113e+02 3.028045654296879885e+00 0.000000000000000000e+00 0.000000000000000000e+00 3.118747314453119998e+03 3.767975568771360084e+00 3.000000000000000000e+00 3.860020446777339771e+02 -9.325000000000000000e+01 4.625000000000000000e+01
3.800000000000000000e+01 7.417538461538459842e+02 3.394151916503910229e+02 3.040405273437500000e+00 0.000000000000000000e+00 0.000000000000000000e+00 3.113697021484380002e+03 3.782386302947999823e+00 3.000000000000000000e+00 3.566663818359380116e+02 -9.275000000000000000e+01 4.625000000000000000e+01
4.500000000000000000e+01 7.400076923076929916e+02 3.375303649902339771e+02 3.052764892578120115e+00 0.000000000000000000e+00 0.000000000000000000e+00 3.040935791015619998e+03 1.660552382469179911e+00 4.000000000000000000e+00 3.573491516113280113e+02 -9.225000000000000000e+01 4.625000000000000000e+01
4.300000000000000000e+01 7.577461538461540158e+02 3.599529418945310226e+02 3.124176025390620115e+00 0.000000000000000000e+00 0.000000000000000000e+00 3.044729248046880002e+03 1.139759421348570001e+00 3.000000000000000000e+00 3.298418884277339771e+02 -9.175000000000000000e+01 4.625000000000000000e+01
4.100000000000000000e+01 7.105769230769229807e+02 3.739111938476560226e+02 3.372711181640620115e+00 0.000000000000000000e+00 0.000000000000000000e+00 3.112397705078119998e+03 1.073204040527339975e+00 3.000000000000000000e+00 4.290896301269530113e+02 -9.125000000000000000e+01 4.625000000000000000e+01
5.900000000000000000e+01 7.191538461538469846e+02 4.060498352050780113e+02 3.621215820312500000e+00 0.000000000000000000e+00 0.000000000000000000e+00 3.131794433593750000e+03 9.355932474136350319e-01 4.000000000000000000e+00 4.554218444824219887e+02 -9.075000000000000000e+01 4.625000000000000000e+01
5.700000000000000000e+01 7.842000000000000455e+02 4.112475891113280113e+02 3.869750976562500000e+00 0.000000000000000000e+00 0.000000000000000000e+00 3.100885253906250000e+03 1.091990590095520020e+00 4.000000000000000000e+00 5.100095520019530113e+02 -9.025000000000000000e+01 4.625000000000000000e+01
4.000000000000000000e+01 7.709461538461539476e+02 3.848157653808589771e+02 4.102111816406250000e+00 0.000000000000000000e+00 0.000000000000000000e+00 3.105143798828119998e+03 1.078135967254640004e+00 3.000000000000000000e+00 5.059528198242189774e+02 -8.975000000000000000e+01 4.625000000000000000e+01
4.700000000000000000e+01 7.451692307692310351e+02 3.996348571777339771e+02 4.318328857421880329e+00 0.000000000000000000e+00 0.000000000000000000e+00 3.059632812500000000e+03 8.991410732269290440e-01 4.000000000000000000e+00 5.262229003906250000e+02 -8.925000000000000000e+01 4.625000000000000000e+01
6.200000000000000000e+01 7.223307692307689649e+02 3.984039916992189774e+02 4.534576416015619671e+00 0.000000000000000000e+00 0.000000000000000000e+00 3.041530273437500000e+03 9.007092714309690162e-01 4.000000000000000000e+00 4.647298583984380116e+02 -8.875000000000000000e+01 4.625000000000000000e+01
5.900000000000000000e+01 7.245461538461539703e+02 3.857439880371089771e+02 4.750793457031250000e+00 0.000000000000000000e+00 0.000000000000000000e+00 2.914254882812500000e+03 9.142629504203799717e-01 4.000000000000000000e+00 4.662372436523439774e+02 -8.825000000000000000e+01 4.625000000000000000e+01
6.500000000000000000e+01 9.172076923076920139e+02 4.322235717773439774e+02 4.717529296875000000e+00 0.000000000000000000e+00 0.000000000000000000e+00 2.871667480468750000e+03 9.375448226928709827e-01 4.000000000000000000e+00 3.420097045898439774e+02 -8.725000000000000000e+01 4.625000000000000000e+01
6.500000000000000000e+01 9.118230769230769965e+02 4.950686645507810226e+02 4.667633056640619671e+00 0.000000000000000000e+00 0.000000000000000000e+00 2.765079833984380002e+03 9.380130767822270066e-01 4.000000000000000000e+00 2.576682128906250000e+02 -8.675000000000000000e+01 4.625000000000000000e+01
5.600000000000000000e+01 8.055461538461529472e+02 4.675172424316410229e+02 4.617736816406250000e+00 0.000000000000000000e+00 0.000000000000000000e+00 2.637604248046880002e+03 1.938717365264889914e+00 4.000000000000000000e+00 2.208110504150390057e+02 -8.625000000000000000e+01 4.625000000000000000e+01
6.200000000000000000e+01 7.002384615384610242e+02 4.115047302246089771e+02 4.246490478515619671e+00 0.000000000000000000e+00 2.352941185235979948e-01 2.752680419921880002e+03 9.252884387969969593e-01 4.000000000000000000e+00 2.407530059814449999e+02 -8.525000000000000000e+01 4.625000000000000000e+01
6.500000000000000000e+01 7.798307692307689649e+02 4.058307189941410229e+02 4.060852050781250000e+00 0.000000000000000000e+00 0.000000000000000000e+00 2.722876708984380002e+03 1.262503981590270108e+00 4.000000000000000000e+00 2.140089416503909945e+02 -8.475000000000000000e+01 4.625000000000000000e+01
4.600000000000000000e+01 8.204230769230770193e+02 3.807220153808589771e+02 3.862213134765620115e+00 0.000000000000000000e+00 0.000000000000000000e+00 2.752462646484380002e+03 2.360927104949949840e+00 4.000000000000000000e+00 1.820630187988280113e+02 -8.425000000000000000e+01 4.625000000000000000e+01
4.800000000000000000e+01 8.447461538461540158e+02 3.314038085937500000e+02 2.752410888671879885e+00 0.000000000000000000e+00 0.000000000000000000e+00 2.780281005859380002e+03 1.841939806938170054e+00 4.000000000000000000e+00 2.223423309326169885e+02 -8.175000000000000000e+01 4.625000000000000000e+01
4.300000000000000000e+01 8.254076923076919456e+02 4.063440856933589771e+02 2.382110595703120115e+00 0.000000000000000000e+00 0.000000000000000000e+00 2.702580322265619998e+03 9.473316073417660244e-01 3.000000000000000000e+00 2.259939575195309942e+02 -8.075000000000000000e+01 4.625000000000000000e+01
2.700000000000000000e+01 8.957538461538459842e+02 4.475372619628910229e+02 2.267150878906250000e+00 0.000000000000000000e+00 0.000000000000000000e+00 2.695428955078119998e+03 9.439798593521120385e-01 3.000000000000000000e+00 1.946758422851559942e+02 -8.025000000000000000e+01 4.625000000000000000e+01
3.800000000000000000e+01 9.457846153846149946e+02 4.889521179199219887e+02 2.084075927734379885e+00 0.000000000000000000e+00 0.000000000000000000e+00 2.708508056640619998e+03 9.312053918838499866e-01 3.000000000000000000e+00 2.459616241455080115e+02 -7.925000000000000000e+01 4.625000000000000000e+01
6.500000000000000000e+01 9.403999999999999773e+02 4.840434570312500000e+02 1.992553710937500000e+00 0.000000000000000000e+00 0.000000000000000000e+00 2.651744873046880002e+03 9.142066836357120030e-01 4.000000000000000000e+00 2.563043212890619884e+02 -7.875000000000000000e+01 4.625000000000000000e+01
7.100000000000000000e+01 9.007461538461540158e+02 4.543480529785160229e+02 1.998565673828119893e+00 0.000000000000000000e+00 0.000000000000000000e+00 2.669236816406250000e+03 9.115326404571529872e-01 4.000000000000000000e+00 2.557548217773440058e+02 -7.825000000000000000e+01 4.625000000000000000e+01
5.900000000000000000e+01 8.927153846153839822e+02 4.033090515136719887e+02 2.004577636718750000e+00 0.000000000000000000e+00 2.000000000000000111e-01 2.656326171875000000e+03 9.253548979759219639e-01 4.000000000000000000e+00 3.084174804687500000e+02 -7.775000000000000000e+01 4.625000000000000000e+01
6.500000000000000000e+01 8.949538461538470528e+02 3.933211669921880116e+02 2.010589599609379885e+00 0.000000000000000000e+00 0.000000000000000000e+00 2.589976318359380002e+03 9.313526749610899769e-01 4.000000000000000000e+00 3.019348144531250000e+02 -7.725000000000000000e+01 4.625000000000000000e+01
5.800000000000000000e+01 9.650461538461539703e+02 4.216457824707030113e+02 2.000213623046879885e+00 0.000000000000000000e+00 0.000000000000000000e+00 2.586224609375000000e+03 9.199632406234740101e-01 4.000000000000000000e+00 2.927533874511719887e+02 -7.675000000000000000e+01 4.625000000000000000e+01
6.300000000000000000e+01 9.464384615384609560e+02 5.032089233398439774e+02 1.881103515625000000e+00 0.000000000000000000e+00 0.000000000000000000e+00 2.577852539062500000e+03 9.180198311805729539e-01 4.000000000000000000e+00 3.250304870605469887e+02 -7.575000000000000000e+01 4.625000000000000000e+01
3.500000000000000000e+01 1.014600000000000023e+03 5.220895385742189774e+02 1.821563720703119893e+00 0.000000000000000000e+00 0.000000000000000000e+00 2.507330810546880002e+03 9.043288230896000535e-01 3.000000000000000000e+00 3.410028991699219887e+02 -7.525000000000000000e+01 4.625000000000000000e+01
6.900000000000000000e+01 1.094330769230770102e+03 5.481616210937500000e+02 1.628875732421880107e+00 0.000000000000000000e+00 0.000000000000000000e+00 2.511954833984380002e+03 8.829041719436649949e-01 4.000000000000000000e+00 4.882854003906250000e+02 -7.425000000000000000e+01 4.625000000000000000e+01
3.600000000000000000e+01 1.059776923076919957e+03 5.255335693359379547e+02 1.520294189453119893e+00 0.000000000000000000e+00 0.000000000000000000e+00 2.494542724609380002e+03 8.862539529800419480e-01 3.000000000000000000e+00 2.838650207519530113e+02 -7.375000000000000000e+01 4.625000000000000000e+01
6.800000000000000000e+01 1.150407692307690013e+03 5.038307800292969887e+02 1.411682128906250000e+00 0.000000000000000000e+00 2.352941185235979948e-01 2.426549316406250000e+03 1.836852192878720036e+00 4.000000000000000000e+00 1.738219757080080115e+02 -7.325000000000000000e+01 4.625000000000000000e+01
3.800000000000000000e+01 1.119223076923080043e+03 5.213794555664060226e+02 1.255096435546880107e+00 0.000000000000000000e+00 0.000000000000000000e+00 2.452386474609380002e+03 2.311452627182009945e+00 3.000000000000000000e+00 8.318289184570309658e+01 -7.225000000000000000e+01 4.625000000000000000e+01
6.700000000000000000e+01 1.238338461538460024e+03 5.403292236328120453e+02 1.181152343750000000e+00 0.000000000000000000e+00 0.000000000000000000e+00 2.443922851562500000e+03 9.063367843627929688e-01 4.000000000000000000e+00 1.645994873046880116e+02 -7.175000000000000000e+01 4.625000000000000000e+01
4.800000000000000000e+01 1.306930769230770011e+03 5.357221069335939774e+02 1.107177734375000000e+00 0.000000000000000000e+00 0.000000000000000000e+00 2.390313720703119998e+03 8.877968788146970436e-01 4.000000000000000000e+00 3.428386840820310226e+02 -7.125000000000000000e+01 4.625000000000000000e+01
6.200000000000000000e+01 1.204638461538459978e+03 5.315548706054689774e+02 1.145507812500000000e+00 0.000000000000000000e+00 0.000000000000000000e+00 2.449380859375000000e+03 8.821114897727969639e-01 4.000000000000000000e+00 2.967801818847660229e+02 -7.075000000000000000e+01 4.625000000000000000e+01
5.500000000000000000e+01 1.193384615384620020e+03 4.960264587402339771e+02 1.183837890625000000e+00 0.000000000000000000e+00 0.000000000000000000e+00 2.459519531250000000e+03 8.683128356933590419e-01 4.000000000000000000e+00 4.172632751464839771e+02 -7.025000000000000000e+01 4.625000000000000000e+01
6.800000000000000000e+01 1.149669230769229898e+03 5.215689086914060226e+02 1.222137451171880107e+00 0.000000000000000000e+00 0.000000000000000000e+00 2.427448242187500000e+03 8.709378838539120204e-01 4.000000000000000000e+00 4.704704589843750000e+02 -6.975000000000000000e+01 4.625000000000000000e+01
6.100000000000000000e+01 1.110984615384619929e+03 5.459500122070310226e+02 1.299865722656250000e+00 0.000000000000000000e+00 0.000000000000000000e+00 2.436332275390619998e+03 8.769529461860660069e-01 4.000000000000000000e+00 3.133165588378910229e+02 -6.925000000000000000e+01 4.625000000000000000e+01
6.900000000000000000e+01 1.134615384615379980e+03 5.284024658203120453e+02 1.495788574218750000e+00 0.000000000000000000e+00 0.000000000000000000e+00 2.521808593750000000e+03 8.832520842552189499e-01 4.000000000000000000e+00 2.283243713378909945e+02 -6.875000000000000000e+01 4.625000000000000000e+01
4.800000000000000000e+01 1.126538461538460069e+03 5.109128417968750000e+02 1.691680908203119893e+00 0.000000000000000000e+00 0.000000000000000000e+00 2.547658935546880002e+03 8.901136517524720349e-01 4.000000000000000000e+00 2.676660766601560226e+02 -6.825000000000000000e+01 4.625000000000000000e+01
4.900000000000000000e+01 1.206315384615380026e+03 5.179691772460939774e+02 1.887573242187500000e+00 0.000000000000000000e+00 0.000000000000000000e+00 2.546516601562500000e+03 2.172959566116329899e+00 4.000000000000000000e+00 1.228268966674799998e+02 -6.775000000000000000e+01 4.625000000000000000e+01
6.700000000000000000e+01 1.335323076923079952e+03 5.199052124023439774e+02 2.164611816406250000e+00 0.000000000000000000e+00 0.000000000000000000e+00 2.558908203125000000e+03 8.838614225387569912e-01 4.000000000000000000e+00 2.204270019531250000e+02 -6.725000000000000000e+01 4.625000000000000000e+01
2.800000000000000000e+01 1.349792307692310033e+03 5.187103881835939774e+02 2.522735595703120115e+00 0.000000000000000000e+00 0.000000000000000000e+00 2.608261230468750000e+03 1.878321766853330077e+00 3.000000000000000000e+00 1.620578002929690058e+02 -6.675000000000000000e+01 4.625000000000000000e+01
4.600000000000000000e+01 1.278084615384620065e+03 5.180870361328120453e+02 2.880859375000000000e+00 0.000000000000000000e+00 0.000000000000000000e+00 2.630754150390619998e+03 2.224163532257080078e+00 4.000000000000000000e+00 1.620080108642580115e+02 -6.625000000000000000e+01 4.625000000000000000e+01
6.600000000000000000e+01 1.252200000000000045e+03 5.256549072265620453e+02 3.238983154296879885e+00 0.000000000000000000e+00 0.000000000000000000e+00 2.637626464843750000e+03 2.246647834777829811e+00 4.000000000000000000e+00 7.362239837646480112e+01 -6.575000000000000000e+01 4.625000000000000000e+01
6.200000000000000000e+01 1.272976923076920002e+03 5.510371093750000000e+02 3.600433349609379885e+00 0.000000000000000000e+00 0.000000000000000000e+00 2.625540771484380002e+03 1.857639431953429954e+00 4.000000000000000000e+00 9.304090881347660513e+01 -6.525000000000000000e+01 4.625000000000000000e+01
6.600000000000000000e+01 1.210646153846149900e+03 5.633942260742189774e+02 3.962982177734379885e+00 0.000000000000000000e+00 0.000000000000000000e+00 2.617487548828119998e+03 9.195128679275510475e-01 4.000000000000000000e+00 5.175208663940429688e+01 -6.475000000000000000e+01 4.625000000000000000e+01
3.100000000000000000e+01 6.684692307692309896e+02 3.276938171386719887e+02 3.008819580078120115e+00 0.000000000000000000e+00 0.000000000000000000e+00 3.185925781250000000e+03 3.738199949264529920e+00 3.000000000000000000e+00 4.519400024414060226e+02 -9.525000000000000000e+01 4.675000000000000000e+01
4.500000000000000000e+01 7.046923076923079634e+02 2.922017211914060226e+02 2.716461181640620115e+00 0.000000000000000000e+00 0.000000000000000000e+00 3.116756347656250000e+03 3.785373687744140181e+00 4.000000000000000000e+00 4.173846130371089771e+02 -9.425000000000000000e+01 4.675000000000000000e+01
4.600000000000000000e+01 6.825923076923080544e+02 2.883411865234380116e+02 2.570281982421879885e+00 0.000000000000000000e+00 0.000000000000000000e+00 3.082171630859380002e+03 3.760119438171389827e+00 4.000000000000000000e+00 4.008521728515619884e+02 -9.375000000000000000e+01 4.675000000000000000e+01
4.900000000000000000e+01 6.992461538461540158e+02 3.352330322265619884e+02 2.593750000000000000e+00 0.000000000000000000e+00 0.000000000000000000e+00 3.058227050781250000e+03 3.673784017562870208e+00 4.000000000000000000e+00 4.038409423828119884e+02 -9.275000000000000000e+01 4.675000000000000000e+01
4.100000000000000000e+01 7.446384615384610015e+02 3.300095520019530113e+02 2.605468750000000000e+00 0.000000000000000000e+00 0.000000000000000000e+00 3.046254882812500000e+03 3.606956243515010208e+00 3.000000000000000000e+00 3.908229370117189774e+02 -9.225000000000000000e+01 4.675000000000000000e+01
5.800000000000000000e+01 7.347769230769230262e+02 4.130571289062500000e+02 3.930297851562500000e+00 0.000000000000000000e+00 0.000000000000000000e+00 3.139449218750000000e+03 9.117667675018310547e-01 4.000000000000000000e+00 2.640792541503910229e+02 -8.925000000000000000e+01 4.675000000000000000e+01
4.900000000000000000e+01 7.280923076923080544e+02 4.067303161621089771e+02 4.132080078125000000e+00 0.000000000000000000e+00 0.000000000000000000e+00 3.121290527343750000e+03 9.058809280395510033e-01 4.000000000000000000e+00 2.686966857910160229e+02 -8.875000000000000000e+01 4.675000000000000000e+01
6.700000000000000000e+01 9.690461538461539703e+02 4.328831787109380116e+02 2.970458984375000000e+00 0.000000000000000000e+00 2.352941185235979948e-01 2.841294433593750000e+03 8.825674057006840378e-01 4.000000000000000000e+00 3.655201110839839771e+02 -8.375000000000000000e+01 4.675000000000000000e+01
6.900000000000000000e+01 9.164076923076919456e+02 4.158787231445310226e+02 2.662506103515620115e+00 0.000000000000000000e+00 2.941176593303679865e-01 2.814278076171880002e+03 8.899357914924620472e-01 4.000000000000000000e+00 4.521817932128910229e+02 -8.325000000000000000e+01 4.675000000000000000e+01
6.600000000000000000e+01 8.785153846153849599e+02 4.012279968261719887e+02 2.354553222656250000e+00 0.000000000000000000e+00 5.294117927551269531e-01 2.787261718750000000e+03 8.852728605270390183e-01 4.000000000000000000e+00 4.447933654785160229e+02 -8.275000000000000000e+01 4.675000000000000000e+01
5.400000000000000000e+01 8.611538461538469846e+02 4.027811889648439774e+02 2.106048583984379885e+00 0.000000000000000000e+00 0.000000000000000000e+00 2.767356201171880002e+03 8.864263892173770421e-01 4.000000000000000000e+00 4.695720825195310226e+02 -8.225000000000000000e+01 4.675000000000000000e+01
6.800000000000000000e+01 8.128384615384619565e+02 4.367919311523439774e+02 1.727874755859380107e+00 0.000000000000000000e+00 0.000000000000000000e+00 2.741767333984380002e+03 1.117929935455320045e+00 4.000000000000000000e+00 4.045057678222660229e+02 -8.125000000000000000e+01 4.675000000000000000e+01
5.700000000000000000e+01 8.405923076923070312e+02 4.677199707031250000e+02 1.463745117187500000e+00 0.000000000000000000e+00 0.000000000000000000e+00 2.715852539062500000e+03 9.184846282005310059e-01 4.000000000000000000e+00 3.155139770507810226e+02 -8.025000000000000000e+01 4.675000000000000000e+01
6.200000000000000000e+01 8.931000000000000227e+02 4.712270202636719887e+02 1.426727294921880107e+00 0.000000000000000000e+00 2.857142857142859829e-02 2.702623779296880002e+03 9.096713662147519752e-01 4.000000000000000000e+00 2.987721557617189774e+02 -7.975000000000000000e+01 4.675000000000000000e+01
6.900000000000000000e+01 9.214461538461549708e+02 4.907064514160160229e+02 1.389709472656250000e+00 0.000000000000000000e+00 2.857142857142859829e-02 2.689394775390619998e+03 9.118303060531619542e-01 4.000000000000000000e+00 3.305902099609380116e+02 -7.925000000000000000e+01 4.675000000000000000e+01
6.000000000000000000e+01 9.635461538461529472e+02 4.880732116699219887e+02 1.352691650390619893e+00 0.000000000000000000e+00 0.000000000000000000e+00 2.676166015625000000e+03 8.984312415122990281e-01 4.000000000000000000e+00 3.049370117187500000e+02 -7.875000000000000000e+01 4.675000000000000000e+01
6.900000000000000000e+01 9.318692307692309669e+02 4.693503723144530113e+02 1.391296386718750000e+00 0.000000000000000000e+00 0.000000000000000000e+00 2.659817626953119998e+03 8.927317857742309570e-01 4.000000000000000000e+00 3.582673339843750000e+02 -7.825000000000000000e+01 4.675000000000000000e+01
6.900000000000000000e+01 9.145000000000000000e+02 4.355164489746089771e+02 1.429870605468750000e+00 0.000000000000000000e+00 0.000000000000000000e+00 2.643469238281250000e+03 8.949347138404849522e-01 4.000000000000000000e+00 3.617947998046880116e+02 -7.775000000000000000e+01 4.675000000000000000e+01
6.900000000000000000e+01 9.227692307692300346e+02 4.271776123046880116e+02 1.468475341796880107e+00 0.000000000000000000e+00 0.000000000000000000e+00 2.627120849609380002e+03 8.940969705581669480e-01 4.000000000000000000e+00 3.711219177246089771e+02 -7.725000000000000000e+01 4.675000000000000000e+01
5.800000000000000000e+01 9.438615384615379753e+02 4.856557617187500000e+02 1.459716796875000000e+00 0.000000000000000000e+00 0.000000000000000000e+00 2.585633300781250000e+03 8.893709182739260033e-01 4.000000000000000000e+00 2.651846923828119884e+02 -7.625000000000000000e+01 4.675000000000000000e+01
5.200000000000000000e+01 1.073792307692310033e+03 5.254863891601560226e+02 1.399414062500000000e+00 0.000000000000000000e+00 0.000000000000000000e+00 2.538870849609380002e+03 8.806145191192630284e-01 4.000000000000000000e+00 3.045661010742189774e+02 -7.525000000000000000e+01 4.675000000000000000e+01
4.800000000000000000e+01 9.884461538461539476e+02 5.388836669921879547e+02 1.329589843750000000e+00 0.000000000000000000e+00 0.000000000000000000e+00 2.515255371093750000e+03 8.776153922080990322e-01 4.000000000000000000e+00 4.685829162597660229e+02 -7.475000000000000000e+01 4.675000000000000000e+01
6.600000000000000000e+01 9.487999999999999545e+02 5.406483154296879547e+02 1.220123291015619893e+00 0.000000000000000000e+00 0.000000000000000000e+00 2.491405517578119998e+03 8.745907545089719459e-01 4.000000000000000000e+00 5.654186401367189774e+02 -7.425000000000000000e+01 4.675000000000000000e+01
6.000000000000000000e+01 8.979846153846159496e+02 5.190686645507810226e+02 1.110626220703119893e+00 0.000000000000000000e+00 0.000000000000000000e+00 2.467555908203119998e+03 8.745860457420350231e-01 4.000000000000000000e+00 4.318895874023439774e+02 -7.375000000000000000e+01 4.675000000000000000e+01
6.400000000000000000e+01 1.018176923076920048e+03 4.773358459472660229e+02 1.001159667968750000e+00 0.000000000000000000e+00 0.000000000000000000e+00 2.443706054687500000e+03 8.760065436363220215e-01 4.000000000000000000e+00 3.847901306152339771e+02 -7.325000000000000000e+01 4.675000000000000000e+01
6.600000000000000000e+01 1.142976923076920002e+03 4.758912353515619884e+02 8.994140625000000000e-01 0.000000000000000000e+00 0.000000000000000000e+00 2.429198974609380002e+03 8.778076171875000000e-01 4.000000000000000000e+00 2.019501953125000000e+02 -7.275000000000000000e+01 4.675000000000000000e+01
6.600000000000000000e+01 1.207384615384620020e+03 4.993207702636719887e+02 6.148376464843750000e-01 0.000000000000000000e+00 0.000000000000000000e+00 2.419132324218750000e+03 8.665437698364260033e-01 4.000000000000000000e+00 5.514144287109379547e+02 -7.025000000000000000e+01 4.675000000000000000e+01
6.500000000000000000e+01 1.058792307692310033e+03 5.000729980468750000e+02 6.213073730468750000e-01 0.000000000000000000e+00 0.000000000000000000e+00 2.431188476562500000e+03 8.714303970336909622e-01 4.000000000000000000e+00 3.356127929687500000e+02 -6.975000000000000000e+01 4.675000000000000000e+01
6.800000000000000000e+01 1.073930769230770011e+03 5.192227172851560226e+02 6.737060546875000000e-01 0.000000000000000000e+00 0.000000000000000000e+00 2.449066406250000000e+03 8.746020197868350499e-01 4.000000000000000000e+00 3.294878845214839771e+02 -6.925000000000000000e+01 4.675000000000000000e+01
6.500000000000000000e+01 1.097538461538460069e+03 5.209962768554689774e+02 8.638000488281250000e-01 0.000000000000000000e+00 0.000000000000000000e+00 2.484409179687500000e+03 8.783323168754579857e-01 4.000000000000000000e+00 2.988483581542969887e+02 -6.875000000000000000e+01 4.675000000000000000e+01
6.700000000000000000e+01 1.070507692307689922e+03 5.021197509765619884e+02 1.053894042968750000e+00 0.000000000000000000e+00 0.000000000000000000e+00 2.519751953125000000e+03 1.936533093452450061e+00 4.000000000000000000e+00 2.072113342285159945e+02 -6.825000000000000000e+01 4.675000000000000000e+01
4.000000000000000000e+01 1.206023076923079998e+03 4.939739379882810226e+02 1.243988037109380107e+00 0.000000000000000000e+00 0.000000000000000000e+00 2.555094726562500000e+03 1.957767486572270066e+00 3.000000000000000000e+00 1.703232879638669885e+02 -6.775000000000000000e+01 4.675000000000000000e+01
4.200000000000000000e+01 1.231400000000000091e+03 5.112060852050780113e+02 1.530609130859380107e+00 0.000000000000000000e+00 0.000000000000000000e+00 2.592951171875000000e+03 8.693246245384219639e-01 3.000000000000000000e+00 3.545072631835939774e+02 -6.725000000000000000e+01 4.675000000000000000e+01
5.000000000000000000e+01 1.263753846153849963e+03 5.146528930664060226e+02 1.913787841796880107e+00 0.000000000000000000e+00 0.000000000000000000e+00 2.633321289062500000e+03 8.592669963836669922e-01 4.000000000000000000e+00 4.314564514160160229e+02 -6.675000000000000000e+01 4.675000000000000000e+01
4.700000000000000000e+01 1.258607692307690058e+03 4.833648071289060226e+02 2.296966552734379885e+00 0.000000000000000000e+00 0.000000000000000000e+00 2.673691406250000000e+03 2.161656618118290130e+00 4.000000000000000000e+00 1.586210479736330115e+02 -6.625000000000000000e+01 4.675000000000000000e+01
4.200000000000000000e+01 1.222330769230770102e+03 4.400264587402339771e+02 2.680175781250000000e+00 0.000000000000000000e+00 0.000000000000000000e+00 2.714061523437500000e+03 2.206472158432009945e+00 3.000000000000000000e+00 5.892361068725590201e+01 -6.575000000000000000e+01 4.675000000000000000e+01
5.000000000000000000e+01 1.289930769230770011e+03 4.446097412109380116e+02 3.089630126953120115e+00 0.000000000000000000e+00 0.000000000000000000e+00 2.680614990234380002e+03 2.233688831329350144e+00 4.000000000000000000e+00 6.647561645507809658e+01 -6.525000000000000000e+01 4.675000000000000000e+01
4.000000000000000000e+00 5.285769230769229807e+02 2.473729858398440058e+02 3.304229736328120115e+00 0.000000000000000000e+00 6.470588445663449928e-01 3.240760986328119998e+03 3.648505687713619938e+00 1.000000000000000000e+00 5.601644897460939774e+02 -9.975000000000000000e+01 4.725000000000000000e+01
4.000000000000000000e+00 5.944538461538460297e+02 2.899802551269530113e+02 3.260314941406250000e+00 0.000000000000000000e+00 1.470588207244869938e+00 3.229199462890619998e+03 3.773653268814090023e+00 1.000000000000000000e+00 2.971401672363280113e+02 -9.725000000000000000e+01 4.725000000000000000e+01
6.000000000000000000e+00 6.257000000000000455e+02 2.808263854980469887e+02 3.071807861328120115e+00 0.000000000000000000e+00 8.235294222831730515e-01 3.193948242187500000e+03 3.809137582778930220e+00 1.000000000000000000e+00 2.653315124511719887e+02 -9.675000000000000000e+01 4.725000000000000000e+01
1.500000000000000000e+01 6.545538461538460524e+02 3.037971191406250000e+02 2.694824218750000000e+00 0.000000000000000000e+00 1.352941155433649900e+00 3.123446044921880002e+03 3.708456039428710049e+00 1.000000000000000000e+00 4.435945129394530113e+02 -9.575000000000000000e+01 4.725000000000000000e+01
6.000000000000000000e+01 6.735384615384620020e+02 3.310973205566410229e+02 2.532562255859379885e+00 0.000000000000000000e+00 0.000000000000000000e+00 3.087895507812500000e+03 3.689295530319209870e+00 4.000000000000000000e+00 4.684996643066410229e+02 -9.525000000000000000e+01 4.725000000000000000e+01
2.200000000000000000e+01 7.102615384615389758e+02 2.804486083984380116e+02 2.072082519531250000e+00 0.000000000000000000e+00 0.000000000000000000e+00 2.980944335937500000e+03 3.642541170120240146e+00 3.000000000000000000e+00 3.934663085937500000e+02 -9.375000000000000000e+01 4.725000000000000000e+01
4.300000000000000000e+01 7.093846153846150173e+02 2.958728332519530113e+02 2.078948974609379885e+00 0.000000000000000000e+00 0.000000000000000000e+00 2.965956787109380002e+03 3.634264945983889827e+00 3.000000000000000000e+00 4.081806030273439774e+02 -9.325000000000000000e+01 4.725000000000000000e+01
4.900000000000000000e+01 7.032615384615379526e+02 3.018532409667969887e+02 2.085815429687500000e+00 0.000000000000000000e+00 0.000000000000000000e+00 2.950969238281250000e+03 3.581420898437500000e+00 4.000000000000000000e+00 3.958314819335939774e+02 -9.275000000000000000e+01 4.725000000000000000e+01
5.500000000000000000e+01 7.531307692307690331e+02 3.306109008789060226e+02 2.092651367187500000e+00 0.000000000000000000e+00 0.000000000000000000e+00 2.935981689453119998e+03 3.231262683868409979e+00 4.000000000000000000e+00 4.340141906738280113e+02 -9.225000000000000000e+01 4.725000000000000000e+01
6.100000000000000000e+01 1.044669230769229898e+03 4.357940979003910229e+02 2.536437988281250000e+00 0.000000000000000000e+00 0.000000000000000000e+00 2.747424072265619998e+03 8.644177317619320400e-01 4.000000000000000000e+00 5.079204101562500000e+02 -8.425000000000000000e+01 4.725000000000000000e+01
6.200000000000000000e+01 1.010361538461540022e+03 4.179232482910160229e+02 2.233978271484379885e+00 0.000000000000000000e+00 5.882352963089940157e-02 2.721814697265619998e+03 8.551677465438840553e-01 4.000000000000000000e+00 4.875455017089839771e+02 -8.375000000000000000e+01 4.725000000000000000e+01
5.700000000000000000e+01 9.385307692307690104e+02 4.078136291503910229e+02 1.931488037109380107e+00 0.000000000000000000e+00 0.000000000000000000e+00 2.696205322265619998e+03 8.591765165328979492e-01 4.000000000000000000e+00 5.041035766601560226e+02 -8.325000000000000000e+01 4.725000000000000000e+01
6.000000000000000000e+01 8.782999999999999545e+02 4.050295104980469887e+02 1.628997802734380107e+00 0.000000000000000000e+00 5.714285714285709944e-02 2.670595947265619998e+03 8.685788512229920544e-01 4.000000000000000000e+00 4.754668579101560226e+02 -8.275000000000000000e+01 4.725000000000000000e+01
5.700000000000000000e+01 8.124461538461539476e+02 4.140960998535160229e+02 1.392578125000000000e+00 0.000000000000000000e+00 0.000000000000000000e+00 2.652083984375000000e+03 8.792620897293089710e-01 4.000000000000000000e+00 4.404003601074219887e+02 -8.225000000000000000e+01 4.725000000000000000e+01
6.600000000000000000e+01 8.529461538461539476e+02 4.332727050781250000e+02 1.051910400390619893e+00 0.000000000000000000e+00 5.714285714285709944e-02 2.629255126953119998e+03 8.813276886940000221e-01 4.000000000000000000e+00 3.977248840332030113e+02 -8.125000000000000000e+01 4.725000000000000000e+01
6.400000000000000000e+01 8.348846153846160405e+02 4.129641418457030113e+02 8.815612792968750000e-01 0.000000000000000000e+00 2.857142857142859829e-02 2.617840820312500000e+03 8.939359188079829543e-01 4.000000000000000000e+00 4.101879882812500000e+02 -8.075000000000000000e+01 4.725000000000000000e+01
5.100000000000000000e+01 8.128538461538460069e+02 3.465453186035160229e+02 7.962036132812500000e-01 0.000000000000000000e+00 0.000000000000000000e+00 2.594106933593750000e+03 8.893766999244689941e-01 4.000000000000000000e+00 3.486355590820310226e+02 -7.975000000000000000e+01 4.725000000000000000e+01
5.600000000000000000e+01 8.597769230769230262e+02 3.836114501953119884e+02 7.717895507812500000e-01 0.000000000000000000e+00 0.000000000000000000e+00 2.582175537109380002e+03 8.913440704345699794e-01 4.000000000000000000e+00 2.873645324707030113e+02 -7.925000000000000000e+01 4.725000000000000000e+01
6.700000000000000000e+01 9.006307692307690331e+02 4.513585205078119884e+02 8.367614746093750000e-01 0.000000000000000000e+00 0.000000000000000000e+00 2.538529541015619998e+03 8.713122010231020287e-01 4.000000000000000000e+00 3.855780639648439774e+02 -7.775000000000000000e+01 4.725000000000000000e+01
6.700000000000000000e+01 9.143615384615389985e+02 4.696389465332030113e+02 9.099426269531250000e-01 0.000000000000000000e+00 0.000000000000000000e+00 2.505026367187500000e+03 8.673999905586240455e-01 4.000000000000000000e+00 3.683796386718750000e+02 -7.675000000000000000e+01 4.725000000000000000e+01
6.400000000000000000e+01 9.447769230769230262e+02 4.909011840820310226e+02 8.897399902343750000e-01 0.000000000000000000e+00 2.857142857142859829e-02 2.482014892578119998e+03 8.614479303359989792e-01 4.000000000000000000e+00 4.209559631347660229e+02 -7.625000000000000000e+01 4.725000000000000000e+01
7.200000000000000000e+01 9.800846153846149491e+02 5.049811096191410229e+02 8.695373535156250000e-01 0.000000000000000000e+00 0.000000000000000000e+00 2.459003173828119998e+03 8.586788773536679908e-01 4.000000000000000000e+00 3.890644226074219887e+02 -7.575000000000000000e+01 4.725000000000000000e+01
7.000000000000000000e+01 1.007123076923080021e+03 5.121181640625000000e+02 8.493041992187500000e-01 0.000000000000000000e+00 0.000000000000000000e+00 2.435991455078119998e+03 8.547609448432920143e-01 4.000000000000000000e+00 4.071577148437500000e+02 -7.525000000000000000e+01 4.725000000000000000e+01
4.100000000000000000e+01 9.730538461538460524e+02 5.143192138671879547e+02 7.924194335937500000e-01 0.000000000000000000e+00 0.000000000000000000e+00 2.413423828125000000e+03 8.563928604125979893e-01 3.000000000000000000e+00 3.960454101562500000e+02 -7.475000000000000000e+01 4.725000000000000000e+01
6.400000000000000000e+01 9.274230769230759961e+02 5.041289978027339771e+02 6.988220214843750000e-01 0.000000000000000000e+00 0.000000000000000000e+00 2.391300292968750000e+03 8.587362766265870251e-01 4.000000000000000000e+00 4.463867797851560226e+02 -7.425000000000000000e+01 4.725000000000000000e+01
4.900000000000000000e+01 9.696461538461539931e+02 4.399957275390619884e+02 5.116271972656250000e-01 0.000000000000000000e+00 5.714285714285709944e-02 2.347053222656250000e+03 8.642186522483830124e-01 4.000000000000000000e+00 4.327992248535160229e+02 -7.325000000000000000e+01 4.725000000000000000e+01
6.800000000000000000e+01 1.171684615384609970e+03 4.368004455566410229e+02 3.402709960937500000e-01 0.000000000000000000e+00 0.000000000000000000e+00 2.322759277343750000e+03 8.510531187057499558e-01 4.000000000000000000e+00 3.783077697753910229e+02 -7.225000000000000000e+01 4.725000000000000000e+01
6.900000000000000000e+01 1.405961538461539931e+03 4.194351806640619884e+02 2.557373046875000000e-01 0.000000000000000000e+00 0.000000000000000000e+00 2.312037597656250000e+03 8.666385412216189854e-01 4.000000000000000000e+00 6.371687011718750000e+02 -7.175000000000000000e+01 4.725000000000000000e+01
6.500000000000000000e+01 1.516692307692309896e+03 4.642279663085939774e+02 1.712036132812500000e-01 0.000000000000000000e+00 0.000000000000000000e+00 2.301315673828119998e+03 1.458536028861999956e+00 4.000000000000000000e+00 7.069932861328120453e+02 -7.125000000000000000e+01 4.725000000000000000e+01
6.000000000000000000e+01 1.068992307692310078e+03 5.042595520019530113e+02 2.120971679687500000e-01 0.000000000000000000e+00 0.000000000000000000e+00 2.334805175781250000e+03 8.628196716308590419e-01 4.000000000000000000e+00 4.391430358886719887e+02 -6.975000000000000000e+01 4.725000000000000000e+01
4.400000000000000000e+01 1.091561538461540067e+03 4.795522155761719887e+02 2.700805664062500000e-01 0.000000000000000000e+00 0.000000000000000000e+00 2.351626464843750000e+03 8.640120625495909534e-01 3.000000000000000000e+00 2.346651763916019888e+02 -6.925000000000000000e+01 4.725000000000000000e+01
7.100000000000000000e+01 1.105092307692309987e+03 5.009942626953119884e+02 4.610900878906250000e-01 0.000000000000000000e+00 0.000000000000000000e+00 2.385421875000000000e+03 8.686634898185729980e-01 4.000000000000000000e+00 2.138042907714840055e+02 -6.875000000000000000e+01 4.725000000000000000e+01
4.500000000000000000e+01 1.183815384615380026e+03 5.125113525390620453e+02 6.520996093750000000e-01 0.000000000000000000e+00 0.000000000000000000e+00 2.419217285156250000e+03 8.714690208435059704e-01 4.000000000000000000e+00 2.268648529052730112e+02 -6.825000000000000000e+01 4.725000000000000000e+01
5.300000000000000000e+01 1.188453846153850009e+03 5.187390136718750000e+02 8.431091308593750000e-01 0.000000000000000000e+00 0.000000000000000000e+00 2.453012939453119998e+03 8.615052700042720168e-01 4.000000000000000000e+00 2.752957763671880116e+02 -6.775000000000000000e+01 4.725000000000000000e+01
6.900000000000000000e+01 1.135869230769229944e+03 5.112964782714839771e+02 1.525146484375000000e+00 0.000000000000000000e+00 0.000000000000000000e+00 2.530219970703119998e+03 9.722833633422850452e-01 4.000000000000000000e+00 5.341102294921879547e+02 -6.675000000000000000e+01 4.725000000000000000e+01
6.700000000000000000e+01 1.149669230769229898e+03 4.513184814453119884e+02 1.916168212890619893e+00 0.000000000000000000e+00 0.000000000000000000e+00 2.570426513671880002e+03 1.132181882858279920e+00 4.000000000000000000e+00 4.215828247070310226e+02 -6.625000000000000000e+01 4.725000000000000000e+01
7.000000000000000000e+01 1.126253846153849963e+03 4.049521484375000000e+02 2.307159423828120115e+00 0.000000000000000000e+00 0.000000000000000000e+00 2.610632812500000000e+03 1.971025943756099963e+00 4.000000000000000000e+00 1.119939270019529971e+02 -6.575000000000000000e+01 4.725000000000000000e+01
5.800000000000000000e+01 1.381523076923079998e+03 5.982340698242189774e+02 5.068115234375000000e+00 0.000000000000000000e+00 0.000000000000000000e+00 2.257604492187500000e+03 1.473722338676449972e+00 4.000000000000000000e+00 1.174912033081049998e+02 -5.325000000000000000e+01 4.725000000000000000e+01
7.000000000000000000e+00 5.390461538461539703e+02 2.462920227050780113e+02 2.950958251953120115e+00 0.000000000000000000e+00 1.176470592617989974e-01 3.162782714843750000e+03 3.633526086807250088e+00 1.000000000000000000e+00 4.533055114746089771e+02 -9.875000000000000000e+01 4.775000000000000000e+01
5.500000000000000000e+01 6.288461538461540385e+02 2.769833068847660229e+02 2.056335449218750000e+00 0.000000000000000000e+00 3.529411852359770063e-01 2.989865234375000000e+03 3.631845474243160066e+00 4.000000000000000000e+00 3.957941284179689774e+02 -9.525000000000000000e+01 4.775000000000000000e+01
4.900000000000000000e+01 6.702230769230769738e+02 2.818546752929689774e+02 1.895507812500000000e+00 0.000000000000000000e+00 0.000000000000000000e+00 2.953149169921880002e+03 3.640232801437380150e+00 4.000000000000000000e+00 4.087915954589839771e+02 -9.475000000000000000e+01 4.775000000000000000e+01
5.500000000000000000e+01 6.885538461538469619e+02 2.868981933593750000e+02 1.734680175781250000e+00 0.000000000000000000e+00 0.000000000000000000e+00 2.916432861328119998e+03 3.297451972961429778e+00 4.000000000000000000e+00 4.250120849609380116e+02 -9.425000000000000000e+01 4.775000000000000000e+01
6.200000000000000000e+01 7.082230769230769738e+02 2.757444763183589771e+02 1.573852539062500000e+00 0.000000000000000000e+00 0.000000000000000000e+00 2.879716796875000000e+03 3.065925121307369938e+00 4.000000000000000000e+00 4.117576904296880116e+02 -9.375000000000000000e+01 4.775000000000000000e+01
5.400000000000000000e+01 7.210076923076929916e+02 2.795082397460939774e+02 1.575866699218750000e+00 0.000000000000000000e+00 0.000000000000000000e+00 2.861714111328119998e+03 9.306757450103759766e-01 4.000000000000000000e+00 4.182876586914060226e+02 -9.325000000000000000e+01 4.775000000000000000e+01
4.200000000000000000e+01 7.221846153846159950e+02 2.791447753906250000e+02 1.577850341796880107e+00 0.000000000000000000e+00 0.000000000000000000e+00 2.843711425781250000e+03 2.945314407348630148e+00 3.000000000000000000e+00 4.110904235839839771e+02 -9.275000000000000000e+01 4.775000000000000000e+01
4.300000000000000000e+01 7.735538461538460524e+02 3.231615295410160229e+02 1.579833984375000000e+00 0.000000000000000000e+00 0.000000000000000000e+00 2.825708740234380002e+03 1.046831488609309968e+00 3.000000000000000000e+00 4.518666687011719887e+02 -9.225000000000000000e+01 4.775000000000000000e+01
5.500000000000000000e+01 8.099307692307689877e+02 3.381897583007810226e+02 1.638488769531250000e+00 0.000000000000000000e+00 0.000000000000000000e+00 2.816566406250000000e+03 8.715430498123170056e-01 4.000000000000000000e+00 4.539009399414060226e+02 -9.175000000000000000e+01 4.775000000000000000e+01
5.300000000000000000e+01 8.195307692307700336e+02 3.576873779296880116e+02 1.867065429687500000e+00 0.000000000000000000e+00 4.705882370471949905e-01 2.834005615234380002e+03 8.565191030502320446e-01 4.000000000000000000e+00 5.015929870605469887e+02 -9.125000000000000000e+01 4.775000000000000000e+01
5.000000000000000000e+01 9.768846153846160405e+02 3.603787841796880116e+02 1.794464111328119893e+00 0.000000000000000000e+00 5.714285714285709944e-02 2.626537597656250000e+03 8.470058441162110485e-01 4.000000000000000000e+00 4.576498413085939774e+02 -8.425000000000000000e+01 4.775000000000000000e+01
5.200000000000000000e+01 9.597230769230769738e+02 3.880208129882810226e+02 1.497467041015619893e+00 0.000000000000000000e+00 2.857142857142859829e-02 2.602334960937500000e+03 8.421140313148499645e-01 4.000000000000000000e+00 4.691658020019530113e+02 -8.375000000000000000e+01 4.775000000000000000e+01
4.700000000000000000e+01 9.212461538461540158e+02 3.994921875000000000e+02 1.200439453125000000e+00 0.000000000000000000e+00 5.714285714285709944e-02 2.578132568359380002e+03 8.492478728294370338e-01 4.000000000000000000e+00 4.470598754882810226e+02 -8.325000000000000000e+01 4.775000000000000000e+01
4.100000000000000000e+01 8.539461538461539476e+02 4.066480407714839771e+02 9.034118652343750000e-01 0.000000000000000000e+00 0.000000000000000000e+00 2.553930175781250000e+03 8.617883920669560105e-01 3.000000000000000000e+00 4.053765563964839771e+02 -8.275000000000000000e+01 4.775000000000000000e+01
5.700000000000000000e+01 8.388769230769230489e+02 4.242979431152339771e+02 5.275268554687500000e-01 0.000000000000000000e+00 1.176470592617989974e-01 2.526777343750000000e+03 8.642333149909969814e-01 4.000000000000000000e+00 3.866573486328119884e+02 -8.175000000000000000e+01 4.775000000000000000e+01
6.400000000000000000e+01 8.551692307692310351e+02 4.011717834472660229e+02 3.759460449218750000e-01 0.000000000000000000e+00 2.857142857142859829e-02 2.516743164062500000e+03 8.689260482788090378e-01 4.000000000000000000e+00 3.657553100585939774e+02 -8.125000000000000000e+01 4.775000000000000000e+01
5.700000000000000000e+01 8.319307692307689877e+02 3.446793212890619884e+02 2.243652343750000000e-01 0.000000000000000000e+00 2.857142857142859829e-02 2.506708740234380002e+03 8.787941336631770461e-01 4.000000000000000000e+00 3.496452026367189774e+02 -8.075000000000000000e+01 4.775000000000000000e+01
4.900000000000000000e+01 8.264076923076919456e+02 2.664559936523439774e+02 1.775817871093750000e-01 0.000000000000000000e+00 0.000000000000000000e+00 2.496224609375000000e+03 8.826222419738769531e-01 4.000000000000000000e+00 3.043401794433589771e+02 -8.025000000000000000e+01 4.775000000000000000e+01
4.600000000000000000e+01 7.835384615384620020e+02 2.319402770996090055e+02 1.657104492187500000e-01 0.000000000000000000e+00 0.000000000000000000e+00 2.485590332031250000e+03 1.304239869117739925e+00 4.000000000000000000e+00 2.043472747802730112e+02 -7.975000000000000000e+01 4.775000000000000000e+01
6.400000000000000000e+01 9.128076923076929461e+02 4.064908752441410229e+02 1.419677734375000000e-01 0.000000000000000000e+00 0.000000000000000000e+00 2.464321777343750000e+03 8.646889925003049537e-01 4.000000000000000000e+00 2.978438415527339771e+02 -7.875000000000000000e+01 4.775000000000000000e+01
5.500000000000000000e+01 8.903230769230769965e+02 4.593966979980469887e+02 2.436218261718750000e-01 0.000000000000000000e+00 0.000000000000000000e+00 2.433589599609380002e+03 8.507869839668269485e-01 4.000000000000000000e+00 3.342947082519530113e+02 -7.775000000000000000e+01 4.775000000000000000e+01
4.900000000000000000e+01 9.036615384615389530e+02 4.668569641113280113e+02 2.944641113281250000e-01 0.000000000000000000e+00 0.000000000000000000e+00 2.418223632812500000e+03 8.434401154518129662e-01 4.000000000000000000e+00 3.651304931640619884e+02 -7.725000000000000000e+01 4.775000000000000000e+01
3.200000000000000000e+01 9.186846153846159950e+02 4.749416503906250000e+02 3.300170898437500000e-01 0.000000000000000000e+00 2.857142857142859829e-02 2.401038574218750000e+03 8.388383388519290440e-01 3.000000000000000000e+00 3.790294189453119884e+02 -7.675000000000000000e+01 4.775000000000000000e+01
6.500000000000000000e+01 9.352230769230769738e+02 4.928973083496089771e+02 3.094787597656250000e-01 0.000000000000000000e+00 0.000000000000000000e+00 2.355754150390619998e+03 8.420259952545170457e-01 4.000000000000000000e+00 4.417263793945310226e+02 -7.575000000000000000e+01 4.775000000000000000e+01
6.200000000000000000e+01 9.342307692307699654e+02 4.861619262695310226e+02 2.552490234375000000e-01 0.000000000000000000e+00 0.000000000000000000e+00 2.311592285156250000e+03 8.365178704261779785e-01 4.000000000000000000e+00 4.818663024902339771e+02 -7.475000000000000000e+01 4.775000000000000000e+01
6.600000000000000000e+01 9.411923076923079634e+02 4.759267578125000000e+02 1.775207519531250000e-01 0.000000000000000000e+00 5.882353186607359730e-01 2.291194824218750000e+03 8.313346505165100098e-01 4.000000000000000000e+00 5.236082153320310226e+02 -7.425000000000000000e+01 4.775000000000000000e+01
6.100000000000000000e+01 9.665692307692299892e+02 4.627160644531250000e+02 9.979248046875000000e-02 0.000000000000000000e+00 5.882353186607359730e-01 2.270797607421880002e+03 8.330369591712950550e-01 4.000000000000000000e+00 4.762137451171880116e+02 -7.375000000000000000e+01 4.775000000000000000e+01
6.200000000000000000e+01 9.859153846153840277e+02 4.461420288085939774e+02 -4.977416992187500000e-02 0.000000000000000000e+00 5.882352963089940157e-02 2.237762939453119998e+03 8.583158850669859730e-01 4.000000000000000000e+00 3.285252075195310226e+02 -7.275000000000000000e+01 4.775000000000000000e+01
6.100000000000000000e+01 1.082484615384619929e+03 4.646333923339839771e+02 -1.196594238281250000e-01 0.000000000000000000e+00 2.857142857142859829e-02 2.227712402343750000e+03 8.425759077072140224e-01 4.000000000000000000e+00 4.381774291992189774e+02 -7.225000000000000000e+01 4.775000000000000000e+01
6.700000000000000000e+01 1.278784615384610106e+03 5.230244750976560226e+02 -1.895446777343750000e-01 0.000000000000000000e+00 0.000000000000000000e+00 2.217662109375000000e+03 1.243892550468439939e+00 4.000000000000000000e+00 5.428207397460939774e+02 -7.175000000000000000e+01 4.775000000000000000e+01
6.300000000000000000e+01 1.303415384615379935e+03 5.600809326171879547e+02 -2.594299316406250000e-01 9.999999776482580358e-03 5.714285714285709944e-02 2.207611572265619998e+03 1.892581343650820092e+00 4.000000000000000000e+00 8.033743896484379547e+02 -7.125000000000000000e+01 4.775000000000000000e+01
6.300000000000000000e+01 1.360030769230769920e+03 5.550820312500000000e+02 -2.386474609375000000e-01 9.999999776482580358e-03 5.714285714285709944e-02 2.217881835937500000e+03 1.430768847465520022e+00 4.000000000000000000e+00 8.515111083984379547e+02 -7.075000000000000000e+01 4.775000000000000000e+01
6.200000000000000000e+01 1.026223076923080043e+03 5.339988403320310226e+02 -2.178955078125000000e-01 0.000000000000000000e+00 0.000000000000000000e+00 2.228151855468750000e+03 8.193493485450740188e-01 4.000000000000000000e+00 3.814985961914060226e+02 -7.025000000000000000e+01 4.775000000000000000e+01
6.700000000000000000e+01 1.127392307692309942e+03 4.643101196289060226e+02 5.838012695312500000e-02 0.000000000000000000e+00 2.352941185235979948e-01 2.286434814453119998e+03 8.545489907264709473e-01 4.000000000000000000e+00 2.125028533935550001e+02 -6.875000000000000000e+01 4.775000000000000000e+01
5.900000000000000000e+01 1.222253846153849963e+03 4.857517700195310226e+02 2.503051757812500000e-01 0.000000000000000000e+00 0.000000000000000000e+00 2.318682861328119998e+03 8.383757472038270153e-01 4.000000000000000000e+00 4.461314086914060226e+02 -6.825000000000000000e+01 4.775000000000000000e+01
7.300000000000000000e+01 1.214476923076920002e+03 5.099122924804689774e+02 4.422302246093750000e-01 0.000000000000000000e+00 0.000000000000000000e+00 2.350930908203119998e+03 8.261673450469969593e-01 4.000000000000000000e+00 4.123943786621089771e+02 -6.775000000000000000e+01 4.775000000000000000e+01
6.900000000000000000e+01 1.092700000000000045e+03 5.226434936523439774e+02 7.376403808593750000e-01 0.000000000000000000e+00 0.000000000000000000e+00 2.387076171875000000e+03 8.245337009429930530e-01 4.000000000000000000e+00 3.018760375976560226e+02 -6.725000000000000000e+01 4.775000000000000000e+01
2.900000000000000000e+01 1.115076923076919911e+03 5.218125000000000000e+02 1.136474609375000000e+00 0.000000000000000000e+00 0.000000000000000000e+00 2.427118896484380002e+03 8.309354186058039993e-01 3.000000000000000000e+00 2.329541320800780113e+02 -6.675000000000000000e+01 4.775000000000000000e+01
2.100000000000000000e+01 1.467961538461539931e+03 5.093490600585939774e+02 4.296600341796880329e+00 0.000000000000000000e+00 0.000000000000000000e+00 2.262345947265619998e+03 1.836286544799800025e+00 3.000000000000000000e+00 1.876552581787109943e+02 -5.775000000000000000e+01 4.775000000000000000e+01
4.900000000000000000e+01 1.607184615384619974e+03 5.522260742187500000e+02 4.346923828125000000e+00 0.000000000000000000e+00 0.000000000000000000e+00 2.288502929687500000e+03 1.993871450424189895e+00 4.000000000000000000e+00 2.181236419677730112e+02 -5.575000000000000000e+01 4.775000000000000000e+01
1.700000000000000000e+01 1.445769230769230035e+03 5.596926879882810226e+02 4.455688476562500000e+00 0.000000000000000000e+00 0.000000000000000000e+00 2.298582519531250000e+03 1.866452932357790084e+00 1.000000000000000000e+00 2.057682342529300001e+02 -5.475000000000000000e+01 4.775000000000000000e+01
5.400000000000000000e+01 6.941769230769230035e+02 2.720036010742189774e+02 1.243804931640619893e+00 0.000000000000000000e+00 0.000000000000000000e+00 2.816271240234380002e+03 9.346514344215389736e-01 4.000000000000000000e+00 3.700046997070310226e+02 -9.425000000000000000e+01 4.825000000000000000e+01
5.800000000000000000e+01 7.060230769230770420e+02 2.905076904296880116e+02 1.075653076171880107e+00 0.000000000000000000e+00 0.000000000000000000e+00 2.778489501953119998e+03 9.319379925727839797e-01 4.000000000000000000e+00 3.648097534179689774e+02 -9.375000000000000000e+01 4.825000000000000000e+01
5.100000000000000000e+01 7.061538461538469846e+02 2.849422912597660229e+02 1.072784423828119893e+00 0.000000000000000000e+00 0.000000000000000000e+00 2.757471435546880002e+03 9.185824990272519752e-01 4.000000000000000000e+00 3.896738891601560226e+02 -9.325000000000000000e+01 4.825000000000000000e+01
5.000000000000000000e+01 7.445769230769240039e+02 2.575751037597660229e+02 1.069915771484380107e+00 0.000000000000000000e+00 0.000000000000000000e+00 2.736453613281250000e+03 9.597800374031070225e-01 4.000000000000000000e+00 4.124656372070310226e+02 -9.275000000000000000e+01 4.825000000000000000e+01
5.700000000000000000e+01 7.898538461538460069e+02 2.839342956542969887e+02 1.067016601562500000e+00 0.000000000000000000e+00 0.000000000000000000e+00 2.715435546875000000e+03 8.828623294830320045e-01 4.000000000000000000e+00 3.771672363281250000e+02 -9.225000000000000000e+01 4.825000000000000000e+01
5.700000000000000000e+01 8.338692307692309669e+02 2.978247070312500000e+02 1.116790771484380107e+00 0.000000000000000000e+00 8.571428571428570120e-02 2.701898193359380002e+03 2.095458269119260031e+00 4.000000000000000000e+00 4.152086486816410229e+02 -9.175000000000000000e+01 4.825000000000000000e+01
5.900000000000000000e+01 8.178076923076920366e+02 2.961388244628910229e+02 1.532318115234380107e+00 0.000000000000000000e+00 2.941176593303679865e-01 2.719706054687500000e+03 1.940888404846190074e+00 4.000000000000000000e+00 4.447554626464839771e+02 -9.075000000000000000e+01 4.825000000000000000e+01
5.400000000000000000e+01 7.930461538461529472e+02 2.955744628906250000e+02 1.740051269531250000e+00 0.000000000000000000e+00 0.000000000000000000e+00 2.728610107421880002e+03 8.448252677917480469e-01 4.000000000000000000e+00 4.892805480957030113e+02 -9.025000000000000000e+01 4.825000000000000000e+01
5.100000000000000000e+01 7.698923076923080089e+02 3.203832092285160229e+02 1.875549316406250000e+00 0.000000000000000000e+00 0.000000000000000000e+00 2.649788085937500000e+03 8.561805486679080479e-01 4.000000000000000000e+00 3.906882019042969887e+02 -8.975000000000000000e+01 4.825000000000000000e+01
6.200000000000000000e+01 9.352923076923079861e+02 3.838340454101560226e+02 1.892578125000000000e+00 0.000000000000000000e+00 0.000000000000000000e+00 2.512354980468750000e+03 1.003752946853639916e+00 4.000000000000000000e+00 4.753412780761719887e+02 -8.575000000000000000e+01 4.825000000000000000e+01
5.400000000000000000e+01 9.354923076923080316e+02 3.595880126953119884e+02 1.613586425781250000e+00 0.000000000000000000e+00 0.000000000000000000e+00 2.511989501953119998e+03 1.389614820480350010e+00 4.000000000000000000e+00 4.522672424316410229e+02 -8.525000000000000000e+01 4.825000000000000000e+01
4.400000000000000000e+01 9.733461538461540385e+02 3.371981506347660229e+02 1.334625244140619893e+00 0.000000000000000000e+00 2.857142857142859829e-02 2.511623779296880002e+03 1.131552338600160024e+00 3.000000000000000000e+00 3.897495117187500000e+02 -8.475000000000000000e+01 4.825000000000000000e+01
6.200000000000000000e+01 9.742230769230769738e+02 3.495855102539060226e+02 1.052490234375000000e+00 0.000000000000000000e+00 2.857142857142859829e-02 2.505650878906250000e+03 8.203519582748409755e-01 4.000000000000000000e+00 3.649282836914060226e+02 -8.425000000000000000e+01 4.825000000000000000e+01
5.800000000000000000e+01 8.992923076923069630e+02 3.817747192382810226e+02 7.609558105468750000e-01 0.000000000000000000e+00 2.857142857142859829e-02 2.482855224609380002e+03 8.217586874961849697e-01 4.000000000000000000e+00 3.962853088378910229e+02 -8.375000000000000000e+01 4.825000000000000000e+01
6.100000000000000000e+01 8.854076923076929688e+02 4.042376708984380116e+02 4.693908691406250000e-01 0.000000000000000000e+00 1.142857142857140046e-01 2.460059814453119998e+03 8.298470377922060326e-01 4.000000000000000000e+00 3.883303222656250000e+02 -8.325000000000000000e+01 4.825000000000000000e+01
4.400000000000000000e+01 8.591461538461529699e+02 4.178525390625000000e+02 1.778564453125000000e-01 0.000000000000000000e+00 5.714285714285709944e-02 2.437264404296880002e+03 8.414035439491269752e-01 3.000000000000000000e+00 3.520365600585939774e+02 -8.275000000000000000e+01 4.825000000000000000e+01
6.600000000000000000e+01 8.305923076923080544e+02 4.373612060546880116e+02 -1.671752929687500000e-01 0.000000000000000000e+00 8.571428571428570120e-02 2.412885253906250000e+03 8.582506179809570312e-01 4.000000000000000000e+00 3.541984252929689774e+02 -8.175000000000000000e+01 4.825000000000000000e+01
2.900000000000000000e+01 8.422538461538449610e+02 4.274512634277339771e+02 -2.999877929687500000e-01 0.000000000000000000e+00 0.000000000000000000e+00 2.404230957031250000e+03 8.676744103431700550e-01 3.000000000000000000e+00 3.217448730468750000e+02 -8.125000000000000000e+01 4.825000000000000000e+01
1.700000000000000000e+01 8.240307692307690104e+02 3.894057312011719887e+02 -4.328308105468750000e-01 0.000000000000000000e+00 3.529411852359770063e-01 2.395576904296880002e+03 8.654832839965820312e-01 1.000000000000000000e+00 3.505063781738280113e+02 -8.075000000000000000e+01 4.825000000000000000e+01
6.000000000000000000e+01 8.372769230769240494e+02 3.411484985351560226e+02 -4.655151367187500000e-01 0.000000000000000000e+00 2.857142857142859829e-02 2.386410644531250000e+03 8.580923676490780361e-01 4.000000000000000000e+00 3.293250427246089771e+02 -8.025000000000000000e+01 4.825000000000000000e+01
4.900000000000000000e+01 8.638230769230769965e+02 3.447168884277339771e+02 -4.648132324218750000e-01 0.000000000000000000e+00 0.000000000000000000e+00 2.377073730468750000e+03 8.535896539688110352e-01 4.000000000000000000e+00 3.167617797851560226e+02 -7.975000000000000000e+01 4.825000000000000000e+01
5.100000000000000000e+01 8.773307692307699881e+02 4.177413635253910229e+02 -4.641113281250000000e-01 0.000000000000000000e+00 2.857142857142859829e-02 2.367736816406250000e+03 8.501995205879210316e-01 4.000000000000000000e+00 3.283214111328119884e+02 -7.925000000000000000e+01 4.825000000000000000e+01
6.200000000000000000e+01 8.655538461538460524e+02 4.594786987304689774e+02 -4.634094238281250000e-01 0.000000000000000000e+00 1.428571428571429880e-01 2.358399902343750000e+03 8.474438786506649501e-01 4.000000000000000000e+00 3.142016601562500000e+02 -7.875000000000000000e+01 4.825000000000000000e+01
6.000000000000000000e+01 9.315461538461539703e+02 4.701307067871089771e+02 -2.925415039062500000e-01 0.000000000000000000e+00 5.714285714285709944e-02 2.313774902343750000e+03 8.354665637016299717e-01 4.000000000000000000e+00 3.386366271972660229e+02 -7.725000000000000000e+01 4.825000000000000000e+01
6.200000000000000000e+01 9.294307692307689877e+02 4.728047790527339771e+02 -2.499084472656250000e-01 0.000000000000000000e+00 2.857142857142859829e-02 2.297050537109380002e+03 8.162196874618530273e-01 4.000000000000000000e+00 3.585451965332030113e+02 -7.675000000000000000e+01 4.825000000000000000e+01
4.800000000000000000e+01 9.510384615384620020e+02 4.826366271972660229e+02 -2.502136230468750000e-01 0.000000000000000000e+00 5.882353186607359730e-01 2.274777832031250000e+03 1.982495665550229935e+00 4.000000000000000000e+00 4.197441711425780113e+02 -7.625000000000000000e+01 4.825000000000000000e+01
5.400000000000000000e+01 9.560307692307690104e+02 4.884004211425780113e+02 -2.505493164062500000e-01 0.000000000000000000e+00 1.176470592617989974e-01 2.252505371093750000e+03 1.596284031867980069e+00 4.000000000000000000e+00 4.361952209472660229e+02 -7.575000000000000000e+01 4.825000000000000000e+01
6.900000000000000000e+01 9.542923076923079861e+02 4.874270935058589771e+02 -2.508544921875000000e-01 0.000000000000000000e+00 2.857142857142859829e-02 2.230232666015619998e+03 1.673174500465389958e+00 4.000000000000000000e+00 4.253572082519530113e+02 -7.525000000000000000e+01 4.825000000000000000e+01
4.400000000000000000e+01 9.550538461538460524e+02 4.788467102050780113e+02 -2.819519042968750000e-01 0.000000000000000000e+00 2.857142857142859829e-02 2.209760742187500000e+03 1.089130163192749912e+00 3.000000000000000000e+00 4.330767822265619884e+02 -7.475000000000000000e+01 4.825000000000000000e+01
5.600000000000000000e+01 9.458384615384610470e+02 4.728385620117189774e+02 -3.437805175781250000e-01 0.000000000000000000e+00 1.142857142857140046e-01 2.191089599609380002e+03 1.314926862716669920e+00 4.000000000000000000e+00 4.692007446289060226e+02 -7.425000000000000000e+01 4.825000000000000000e+01
6.500000000000000000e+01 9.724230769230770193e+02 4.639788208007810226e+02 -4.056396484375000000e-01 9.999999776482580358e-03 5.714285714285709944e-02 2.172418212890619998e+03 1.924251198768619942e+00 4.000000000000000000e+00 5.469418945312500000e+02 -7.375000000000000000e+01 4.825000000000000000e+01
3.200000000000000000e+01 9.450307692307690104e+02 4.519853820800780113e+02 -4.674682617187500000e-01 0.000000000000000000e+00 5.882353186607359730e-01 2.153747070312500000e+03 1.338605046272280052e+00 3.000000000000000000e+00 5.366400756835939774e+02 -7.325000000000000000e+01 4.825000000000000000e+01
6.200000000000000000e+01 9.622692307692309441e+02 4.505471191406250000e+02 -5.243530273437500000e-01 0.000000000000000000e+00 5.294117927551269531e-01 2.142044921875000000e+03 8.277909755706790440e-01 4.000000000000000000e+00 4.724485168457030113e+02 -7.275000000000000000e+01 4.825000000000000000e+01
6.500000000000000000e+01 9.806538461538459615e+02 4.632419128417969887e+02 -5.795898437500000000e-01 0.000000000000000000e+00 5.714285714285709944e-02 2.132665771484380002e+03 8.329255580902099609e-01 4.000000000000000000e+00 3.408696289062500000e+02 -7.225000000000000000e+01 4.825000000000000000e+01
6.800000000000000000e+01 1.089738461538459887e+03 4.775076904296880116e+02 -6.348266601562500000e-01 0.000000000000000000e+00 5.714285714285709944e-02 2.123286621093750000e+03 8.173902630805970349e-01 4.000000000000000000e+00 3.695540771484380116e+02 -7.175000000000000000e+01 4.825000000000000000e+01
6.100000000000000000e+01 1.085700000000000045e+03 4.898060607910160229e+02 -6.900634765625000000e-01 0.000000000000000000e+00 2.857142857142859829e-02 2.113907470703119998e+03 8.191225528717039905e-01 4.000000000000000000e+00 3.328840026855469887e+02 -7.125000000000000000e+01 4.825000000000000000e+01
6.300000000000000000e+01 1.074238461538459887e+03 4.881461791992189774e+02 -6.621398925781250000e-01 0.000000000000000000e+00 2.857142857142859829e-02 2.123284667968750000e+03 8.120300173759460449e-01 4.000000000000000000e+00 2.559029388427730112e+02 -7.075000000000000000e+01 4.825000000000000000e+01
6.100000000000000000e+01 1.163861538461540022e+03 4.790257568359380116e+02 -6.342468261718750000e-01 0.000000000000000000e+00 0.000000000000000000e+00 2.132661621093750000e+03 7.995492219924930088e-01 4.000000000000000000e+00 2.790186157226560226e+02 -7.025000000000000000e+01 4.825000000000000000e+01
4.900000000000000000e+01 1.088330769230770102e+03 4.734266967773439774e+02 -6.063232421875000000e-01 0.000000000000000000e+00 0.000000000000000000e+00 2.142038818359380002e+03 8.283311128616329677e-01 4.000000000000000000e+00 1.893049163818359943e+02 -6.975000000000000000e+01 4.825000000000000000e+01
5.300000000000000000e+01 1.202023076923079998e+03 4.707916564941410229e+02 -1.514892578125000000e-01 0.000000000000000000e+00 0.000000000000000000e+00 2.218148193359380002e+03 8.262496590614319958e-01 4.000000000000000000e+00 3.307704772949219887e+02 -6.825000000000000000e+01 4.825000000000000000e+01
6.600000000000000000e+01 1.223353846153850100e+03 4.924128723144530113e+02 4.138183593750000000e-02 0.000000000000000000e+00 0.000000000000000000e+00 2.248849121093750000e+03 8.194483518600460537e-01 4.000000000000000000e+00 3.514015808105469887e+02 -6.775000000000000000e+01 4.825000000000000000e+01
7.100000000000000000e+01 1.122346153846149946e+03 5.027355346679689774e+02 3.411254882812500000e-01 0.000000000000000000e+00 0.000000000000000000e+00 2.284138916015619998e+03 8.187907338142399460e-01 4.000000000000000000e+00 2.681500244140619884e+02 -6.725000000000000000e+01 4.825000000000000000e+01
7.000000000000000000e+01 1.150000000000000000e+03 5.037157897949219887e+02 7.478332519531250000e-01 0.000000000000000000e+00 0.000000000000000000e+00 2.324017822265619998e+03 8.149830102920530006e-01 4.000000000000000000e+00 4.225621337890619884e+02 -6.675000000000000000e+01 4.825000000000000000e+01
6.900000000000000000e+01 1.145176923076920048e+03 5.139420166015620453e+02 1.154510498046880107e+00 0.000000000000000000e+00 0.000000000000000000e+00 2.363896728515619998e+03 8.372372388839719459e-01 4.000000000000000000e+00 4.232078552246089771e+02 -6.625000000000000000e+01 4.825000000000000000e+01
5.000000000000000000e+01 1.232976923076920002e+03 5.517775878906250000e+02 2.031585693359379885e+00 0.000000000000000000e+00 0.000000000000000000e+00 2.388236572265619998e+03 8.345665335655210182e-01 4.000000000000000000e+00 4.195555114746089771e+02 -6.525000000000000000e+01 4.825000000000000000e+01
1.100000000000000000e+01 1.255276923076919957e+03 5.910411987304689774e+02 3.839111328125000000e+00 0.000000000000000000e+00 0.000000000000000000e+00 2.215623046875000000e+03 1.812077283859250043e+00 1.000000000000000000e+00 4.696336364746089771e+02 -5.825000000000000000e+01 4.825000000000000000e+01
4.700000000000000000e+01 1.315015384615380071e+03 5.789090576171879547e+02 3.777160644531250000e+00 0.000000000000000000e+00 0.000000000000000000e+00 2.220153808593750000e+03 1.814526915550229935e+00 4.000000000000000000e+00 3.627439270019530113e+02 -5.775000000000000000e+01 4.825000000000000000e+01
2.200000000000000000e+01 1.278523076923079998e+03 5.729507446289060226e+02 3.764129638671879885e+00 0.000000000000000000e+00 0.000000000000000000e+00 2.227177001953119998e+03 1.887472867965700019e+00 3.000000000000000000e+00 3.640198669433589771e+02 -5.725000000000000000e+01 4.825000000000000000e+01
3.500000000000000000e+01 1.358599999999999909e+03 5.763348388671879547e+02 3.738067626953120115e+00 0.000000000000000000e+00 0.000000000000000000e+00 2.241223388671880002e+03 1.939140796661380062e+00 3.000000000000000000e+00 2.714124145507810226e+02 -5.625000000000000000e+01 4.825000000000000000e+01
3.600000000000000000e+01 1.401799999999999955e+03 5.735719604492189774e+02 3.803314208984379885e+00 0.000000000000000000e+00 0.000000000000000000e+00 2.246427490234380002e+03 1.993491291999820003e+00 3.000000000000000000e+00 2.343341522216800001e+02 -5.575000000000000000e+01 4.825000000000000000e+01
2.000000000000000000e+01 1.396123076923079907e+03 5.737103881835939774e+02 3.868560791015620115e+00 0.000000000000000000e+00 0.000000000000000000e+00 2.251631591796880002e+03 1.712655782699580076e+00 3.000000000000000000e+00 2.352932434082030113e+02 -5.525000000000000000e+01 4.825000000000000000e+01
4.000000000000000000e+01 1.276923076923080089e+03 5.816057739257810226e+02 4.005767822265619671e+00 0.000000000000000000e+00 0.000000000000000000e+00 2.242748779296880002e+03 8.136433362960819871e-01 3.000000000000000000e+00 1.302368621826169885e+02 -5.425000000000000000e+01 4.825000000000000000e+01
3.000000000000000000e+00 5.647692307692309441e+02 2.403510284423830115e+02 2.086334228515620115e+00 0.000000000000000000e+00 5.882353186607359730e-01 2.979109863281250000e+03 3.654108524322510210e+00 1.000000000000000000e+00 3.018871459960939774e+02 -9.775000000000000000e+01 4.875000000000000000e+01
3.000000000000000000e+00 6.086615384615380435e+02 2.816318054199219887e+02 1.529266357421880107e+00 0.000000000000000000e+00 1.117647051811220038e+00 2.877527099609380002e+03 3.549945592880249912e+00 1.000000000000000000e+00 3.100026855468750000e+02 -9.625000000000000000e+01 4.875000000000000000e+01
7.000000000000000000e+00 6.541692307692310351e+02 2.870187683105469887e+02 1.123352050781250000e+00 0.000000000000000000e+00 5.294117927551269531e-01 2.798823242187500000e+03 2.977973222732539949e+00 1.000000000000000000e+00 3.607959289550780113e+02 -9.525000000000000000e+01 4.875000000000000000e+01
1.900000000000000000e+01 6.779692307692309896e+02 2.798859252929689774e+02 9.490051269531250000e-01 0.000000000000000000e+00 5.882353186607359730e-01 2.760330078125000000e+03 2.299339532852170187e+00 1.000000000000000000e+00 3.304945068359380116e+02 -9.475000000000000000e+01 4.875000000000000000e+01
4.200000000000000000e+01 7.656846153846149718e+02 2.934852600097660229e+02 5.769348144531250000e-01 0.000000000000000000e+00 0.000000000000000000e+00 2.636902587890619998e+03 1.743902564048769976e+00 3.000000000000000000e+00 3.807443542480469887e+02 -9.275000000000000000e+01 4.875000000000000000e+01
5.400000000000000000e+01 7.967615384615389758e+02 2.932876281738280113e+02 5.652770996093750000e-01 0.000000000000000000e+00 2.857142857142859829e-02 2.613681640625000000e+03 9.819247722625730201e-01 4.000000000000000000e+00 3.776227111816410229e+02 -9.225000000000000000e+01 4.875000000000000000e+01
5.200000000000000000e+01 8.401769230769230035e+02 3.007324523925780113e+02 6.009521484375000000e-01 0.000000000000000000e+00 1.714285714285710138e-01 2.596717285156250000e+03 1.528464317321780008e+00 4.000000000000000000e+00 4.070294494628910229e+02 -9.175000000000000000e+01 4.875000000000000000e+01
6.300000000000000000e+01 8.381076923076919911e+02 3.073057556152339771e+02 7.786865234375000000e-01 0.000000000000000000e+00 0.000000000000000000e+00 2.598522216796880002e+03 2.093606233596799981e+00 4.000000000000000000e+00 4.481235351562500000e+02 -9.125000000000000000e+01 4.875000000000000000e+01
6.500000000000000000e+01 8.178923076923080089e+02 3.294457397460939774e+02 1.134155273437500000e+00 0.000000000000000000e+00 2.857142857142859829e-02 2.602131835937500000e+03 1.781433701515199974e+00 4.000000000000000000e+00 4.933945312500000000e+02 -9.025000000000000000e+01 4.875000000000000000e+01
5.400000000000000000e+01 8.235384615384620020e+02 3.220508728027339771e+02 1.237609863281250000e+00 0.000000000000000000e+00 2.857142857142859829e-02 2.512681884765619998e+03 1.718945026397709963e+00 4.000000000000000000e+00 4.865958251953119884e+02 -8.975000000000000000e+01 4.875000000000000000e+01
6.300000000000000000e+01 7.872923076923079861e+02 3.207713317871089771e+02 1.266784667968750000e+00 0.000000000000000000e+00 0.000000000000000000e+00 2.331977294921880002e+03 1.582028031349179908e+00 4.000000000000000000e+00 4.775141601562500000e+02 -8.925000000000000000e+01 4.875000000000000000e+01
5.200000000000000000e+01 8.356230769230760416e+02 3.906992797851560226e+02 8.926391601562500000e-01 0.000000000000000000e+00 5.882352963089940157e-02 2.448678955078119998e+03 1.989857554435729980e+00 4.000000000000000000e+00 3.973202819824219887e+02 -8.525000000000000000e+01 4.875000000000000000e+01
6.600000000000000000e+01 8.476846153846159950e+02 3.748545532226560226e+02 6.188354492187500000e-01 0.000000000000000000e+00 2.857142857142859829e-02 2.424813232421880002e+03 1.988097429275510031e+00 4.000000000000000000e+00 3.724656066894530113e+02 -8.475000000000000000e+01 4.875000000000000000e+01
6.300000000000000000e+01 8.826076923076930143e+02 3.755951843261719887e+02 3.489074707031250000e-01 0.000000000000000000e+00 5.882353186607359730e-01 2.402072021484380002e+03 2.003885746002199930e+00 4.000000000000000000e+00 3.590238647460939774e+02 -8.425000000000000000e+01 4.875000000000000000e+01
5.000000000000000000e+01 8.909461538461539476e+02 3.915906677246089771e+02 9.069824218750000000e-02 0.000000000000000000e+00 5.714285714285709944e-02 2.382704833984380002e+03 8.322681188583369583e-01 4.000000000000000000e+00 3.251567687988280113e+02 -8.375000000000000000e+01 4.875000000000000000e+01
5.200000000000000000e+01 8.390692307692299892e+02 4.121239318847660229e+02 -1.675415039062500000e-01 0.000000000000000000e+00 0.000000000000000000e+00 2.363337646484380002e+03 8.314341306686400257e-01 4.000000000000000000e+00 3.232625122070310226e+02 -8.325000000000000000e+01 4.875000000000000000e+01
6.900000000000000000e+01 8.361846153846149718e+02 4.251931457519530113e+02 -4.257812500000000000e-01 0.000000000000000000e+00 0.000000000000000000e+00 2.343970214843750000e+03 8.378474712371829503e-01 4.000000000000000000e+00 3.069476318359380116e+02 -8.275000000000000000e+01 4.875000000000000000e+01
2.600000000000000000e+01 8.193230769230769965e+02 4.381427917480469887e+02 -6.081237792968750000e-01 0.000000000000000000e+00 2.857142857142859829e-02 2.330743896484380002e+03 8.431279063224790260e-01 3.000000000000000000e+00 2.806641235351560226e+02 -8.225000000000000000e+01 4.875000000000000000e+01
5.000000000000000000e+01 8.190076923076919684e+02 4.495148315429689774e+02 -7.145996093750000000e-01 0.000000000000000000e+00 2.857142857142859829e-02 2.323658447265619998e+03 8.466758728027340419e-01 4.000000000000000000e+00 3.063881835937500000e+02 -8.175000000000000000e+01 4.875000000000000000e+01
6.800000000000000000e+01 8.327230769230769738e+02 4.522370300292969887e+02 -8.210754394531250000e-01 0.000000000000000000e+00 5.714285714285709944e-02 2.316572998046880002e+03 8.496609926223750442e-01 4.000000000000000000e+00 2.842149353027339771e+02 -8.125000000000000000e+01 4.875000000000000000e+01
5.300000000000000000e+01 7.844769230769229580e+02 4.393803405761719887e+02 -9.275817871093750000e-01 0.000000000000000000e+00 0.000000000000000000e+00 2.309487548828119998e+03 2.208610057830810103e+00 4.000000000000000000e+00 2.851445007324219887e+02 -8.075000000000000000e+01 4.875000000000000000e+01
3.500000000000000000e+01 8.692692307692309441e+02 4.544194946289060226e+02 -9.445800781250000000e-01 0.000000000000000000e+00 0.000000000000000000e+00 2.282124023437500000e+03 2.954519748687740144e+00 3.000000000000000000e+00 2.771963806152339771e+02 -7.925000000000000000e+01 4.875000000000000000e+01
3.900000000000000000e+01 8.796692307692310351e+02 4.685261535644530113e+02 -9.410705566406250000e-01 0.000000000000000000e+00 0.000000000000000000e+00 2.272817871093750000e+03 9.172104597091670364e-01 3.000000000000000000e+00 3.135198669433589771e+02 -7.875000000000000000e+01 4.875000000000000000e+01
6.400000000000000000e+01 8.800307692307690104e+02 4.663063659667969887e+02 -8.997192382812500000e-01 0.000000000000000000e+00 0.000000000000000000e+00 2.256313964843750000e+03 1.140908479690549981e+00 4.000000000000000000e+00 3.085361022949219887e+02 -7.825000000000000000e+01 4.875000000000000000e+01
6.800000000000000000e+01 8.956076923076919911e+02 4.659923400878910229e+02 -8.170166015625000000e-01 0.000000000000000000e+00 2.857142857142859829e-02 2.223306396484380002e+03 8.166640400886540085e-01 4.000000000000000000e+00 3.030991821289060226e+02 -7.725000000000000000e+01 4.875000000000000000e+01
3.600000000000000000e+01 9.059923076923080316e+02 4.660487060546880116e+02 -7.882080078125000000e-01 0.000000000000000000e+00 2.941176593303679865e-01 2.205148437500000000e+03 1.996564507484440032e+00 3.000000000000000000e+00 4.052286682128910229e+02 -7.675000000000000000e+01 4.875000000000000000e+01
7.000000000000000000e+01 9.243076923076920366e+02 4.743436889648439774e+02 -9.009704589843750000e-01 9.999999776482580358e-03 5.882353186607359730e-01 2.096708740234380002e+03 1.556341886520389961e+00 4.000000000000000000e+00 5.547574462890620453e+02 -7.425000000000000000e+01 4.875000000000000000e+01
2.400000000000000000e+01 9.550230769230770420e+02 4.397765808105469887e+02 -1.010253906250000000e+00 9.999999776482580358e-03 5.714285714285709944e-02 2.060018798828119998e+03 1.325016379356380058e+00 3.000000000000000000e+00 5.566351318359379547e+02 -7.325000000000000000e+01 4.875000000000000000e+01
5.700000000000000000e+01 8.947923076923079861e+02 4.403489379882810226e+02 -1.052398681640619893e+00 0.000000000000000000e+00 2.857142857142859829e-02 2.048578613281250000e+03 1.049268126487729935e+00 4.000000000000000000e+00 2.467613983154300001e+02 -7.275000000000000000e+01 4.875000000000000000e+01
6.600000000000000000e+01 1.094961538461539931e+03 4.347026367187500000e+02 -1.166442871093750000e+00 0.000000000000000000e+00 2.857142857142859829e-02 2.021163452148440001e+03 1.112321734428409981e+00 4.000000000000000000e+00 3.124559936523439774e+02 -7.125000000000000000e+01 4.875000000000000000e+01
6.300000000000000000e+01 1.086076923076919911e+03 4.523085021972660229e+02 -1.130493164062500000e+00 9.999999776482580358e-03 2.857142857142859829e-02 2.029170410156250000e+03 1.936403274536129926e+00 4.000000000000000000e+00 6.773883056640620453e+02 -7.075000000000000000e+01 4.875000000000000000e+01
5.800000000000000000e+01 1.174315384615390030e+03 4.608168640136719887e+02 -1.094543457031250000e+00 9.999999776482580358e-03 0.000000000000000000e+00 2.037177490234380002e+03 1.361374258995059927e+00 4.000000000000000000e+00 6.630941162109379547e+02 -7.025000000000000000e+01 4.875000000000000000e+01
5.600000000000000000e+01 1.137061538461540067e+03 4.731344604492189774e+02 -1.058593750000000000e+00 0.000000000000000000e+00 0.000000000000000000e+00 2.045184570312500000e+03 7.994110584259029872e-01 4.000000000000000000e+00 3.482135009765619884e+02 -6.975000000000000000e+01 4.875000000000000000e+01
6.300000000000000000e+01 1.145838461538460024e+03 5.022133178710939774e+02 -1.372985839843750000e-01 0.000000000000000000e+00 0.000000000000000000e+00 2.175510009765619998e+03 1.038995623588560013e+00 4.000000000000000000e+00 3.110983276367189774e+02 -6.725000000000000000e+01 4.875000000000000000e+01
2.600000000000000000e+01 1.208000000000000000e+03 4.871895751953119884e+02 2.570800781250000000e-01 0.000000000000000000e+00 0.000000000000000000e+00 2.213376708984380002e+03 1.195668578147889960e+00 3.000000000000000000e+00 5.611240844726560226e+02 -6.675000000000000000e+01 4.875000000000000000e+01
6.300000000000000000e+01 1.253076923076919911e+03 4.971596679687500000e+02 6.514587402343750000e-01 0.000000000000000000e+00 0.000000000000000000e+00 2.251243408203119998e+03 8.938788771629330165e-01 4.000000000000000000e+00 3.931585388183589771e+02 -6.625000000000000000e+01 4.875000000000000000e+01
3.400000000000000000e+01 1.204330769230770102e+03 5.278962402343750000e+02 1.045867919921880107e+00 0.000000000000000000e+00 0.000000000000000000e+00 2.289110107421880002e+03 7.921564579010009766e-01 3.000000000000000000e+00 5.199870605468750000e+02 -6.575000000000000000e+01 4.875000000000000000e+01
5.000000000000000000e+01 1.180930769230770011e+03 5.565148315429689774e+02 1.506378173828119893e+00 0.000000000000000000e+00 0.000000000000000000e+00 2.279867431640619998e+03 7.957042455673219994e-01 4.000000000000000000e+00 4.247658996582030113e+02 -6.525000000000000000e+01 4.875000000000000000e+01
6.600000000000000000e+01 1.187815384615380026e+03 5.754304199218750000e+02 1.988922119140619893e+00 0.000000000000000000e+00 0.000000000000000000e+00 2.254921875000000000e+03 8.036502003669739880e-01 4.000000000000000000e+00 2.171273345947269888e+02 -6.475000000000000000e+01 4.875000000000000000e+01
5.000000000000000000e+01 1.160838461538460024e+03 5.859000244140620453e+02 3.309448242187500000e+00 0.000000000000000000e+00 0.000000000000000000e+00 2.132410156250000000e+03 1.969517230987549938e+00 4.000000000000000000e+00 2.921867370605469887e+02 -5.825000000000000000e+01 4.875000000000000000e+01
7.000000000000000000e+00 1.121976923076920002e+03 5.909415283203120453e+02 3.223968505859379885e+00 0.000000000000000000e+00 0.000000000000000000e+00 2.139426757812500000e+03 1.519392251968380014e+00 1.000000000000000000e+00 4.890669860839839771e+02 -5.725000000000000000e+01 4.875000000000000000e+01
6.600000000000000000e+01 1.134676923076920048e+03 5.812207031250000000e+02 3.191894531250000000e+00 0.000000000000000000e+00 0.000000000000000000e+00 2.147907958984380002e+03 1.948730230331420010e+00 4.000000000000000000e+00 2.246129150390619884e+02 -5.625000000000000000e+01 4.875000000000000000e+01
5.800000000000000000e+01 1.136076923076919911e+03 5.720255737304689774e+02 3.273681640625000000e+00 0.000000000000000000e+00 0.000000000000000000e+00 2.153154052734380002e+03 2.008877277374269799e+00 4.000000000000000000e+00 2.072796783447269888e+02 -5.575000000000000000e+01 4.875000000000000000e+01
3.800000000000000000e+01 1.188407692307690013e+03 5.780091552734379547e+02 3.355468750000000000e+00 0.000000000000000000e+00 0.000000000000000000e+00 2.158400146484380002e+03 2.023649454116819957e+00 3.000000000000000000e+00 2.823653869628910229e+02 -5.525000000000000000e+01 4.875000000000000000e+01
2.100000000000000000e+01 1.207984615384619929e+03 5.965772094726560226e+02 3.437255859375000000e+00 0.000000000000000000e+00 0.000000000000000000e+00 2.163645996093750000e+03 2.008907079696660158e+00 3.000000000000000000e+00 2.294651031494140057e+02 -5.475000000000000000e+01 4.875000000000000000e+01
9.000000000000000000e+00 6.082769230769230262e+02 2.405893096923830115e+02 1.621002197265619893e+00 0.000000000000000000e+00 1.176470637321469948e+00 2.889971923828119998e+03 3.567128181457519975e+00 1.000000000000000000e+00 3.852011108398439774e+02 -9.825000000000000000e+01 4.925000000000000000e+01
6.700000000000000000e+01 6.045384615384620020e+02 2.650178222656250000e+02 1.083984375000000000e+00 0.000000000000000000e+00 2.352941185235979948e-01 2.789942626953119998e+03 1.604526042938229979e+00 4.000000000000000000e+00 3.350627746582030113e+02 -9.625000000000000000e+01 4.925000000000000000e+01
6.400000000000000000e+01 7.391923076923079634e+02 3.228109436035160229e+02 1.657714843750000000e-01 0.000000000000000000e+00 0.000000000000000000e+00 2.599057617187500000e+03 2.229964971542360175e+00 4.000000000000000000e+00 3.797130432128910229e+02 -9.375000000000000000e+01 4.925000000000000000e+01
5.100000000000000000e+01 7.536615384615389530e+02 3.281007080078119884e+02 1.382446289062500000e-01 0.000000000000000000e+00 2.857142857142859829e-02 2.575084960937500000e+03 2.220333099365229934e+00 4.000000000000000000e+00 3.912229614257810226e+02 -9.325000000000000000e+01 4.925000000000000000e+01
4.800000000000000000e+01 7.627153846153850054e+02 3.214253845214839771e+02 1.107482910156250000e-01 0.000000000000000000e+00 5.714285714285709944e-02 2.551112060546880002e+03 2.191840171813959959e+00 4.000000000000000000e+00 4.321422729492189774e+02 -9.275000000000000000e+01 4.925000000000000000e+01
5.800000000000000000e+01 8.013999999999999773e+02 3.291920776367189774e+02 9.545898437500000000e-02 0.000000000000000000e+00 8.571428571428570120e-02 2.508476806640619998e+03 2.142397880554200107e+00 4.000000000000000000e+00 4.599570617675780113e+02 -9.175000000000000000e+01 4.925000000000000000e+01
5.000000000000000000e+01 8.144461538461539476e+02 3.338511352539060226e+02 2.267761230468750000e-01 0.000000000000000000e+00 8.571428571428570120e-02 2.505746582031250000e+03 2.106612205505370206e+00 4.000000000000000000e+00 4.646437377929689774e+02 -9.125000000000000000e+01 4.925000000000000000e+01
5.500000000000000000e+01 8.320461538461539703e+02 3.470938720703119884e+02 3.580932617187500000e-01 0.000000000000000000e+00 5.882352963089940157e-02 2.503016113281250000e+03 2.058901309967040127e+00 4.000000000000000000e+00 5.062287292480469887e+02 -9.075000000000000000e+01 4.925000000000000000e+01
6.000000000000000000e+01 8.155384615384620020e+02 3.460782470703119884e+02 5.634460449218750000e-01 0.000000000000000000e+00 2.941176593303679865e-01 2.433010253906250000e+03 1.985941886901859910e+00 4.000000000000000000e+00 4.912802124023439774e+02 -8.975000000000000000e+01 4.925000000000000000e+01
4.500000000000000000e+01 8.097307692307690559e+02 3.297027282714839771e+02 5.801391601562500000e-01 0.000000000000000000e+00 2.571428571428570065e-01 2.301189941406250000e+03 1.636946797370909978e+00 4.000000000000000000e+00 4.277769470214839771e+02 -8.925000000000000000e+01 4.925000000000000000e+01
4.700000000000000000e+01 8.204307692307700108e+02 3.566723937988280113e+02 6.115112304687500000e-01 0.000000000000000000e+00 2.352941185235979948e-01 2.083339355468750000e+03 1.979182600975039952e+00 4.000000000000000000e+00 4.700942382812500000e+02 -8.775000000000000000e+01 4.925000000000000000e+01
5.000000000000000000e+01 8.257461538461540158e+02 3.937156066894530113e+02 6.032409667968750000e-01 0.000000000000000000e+00 2.000000000000000111e-01 2.188333251953119998e+03 1.952056288719179911e+00 4.000000000000000000e+00 4.123779296875000000e+02 -8.725000000000000000e+01 4.925000000000000000e+01
2.900000000000000000e+01 8.287538461538459842e+02 4.084529113769530113e+02 5.949707031250000000e-01 0.000000000000000000e+00 2.352941185235979948e-01 2.293327148437500000e+03 1.918120384216309926e+00 3.000000000000000000e+00 3.583916320800780113e+02 -8.675000000000000000e+01 4.925000000000000000e+01
2.200000000000000000e+01 8.390153846153849599e+02 4.113103637695310226e+02 5.867004394531250000e-01 0.000000000000000000e+00 5.882353186607359730e-01 2.398321044921880002e+03 1.283315420150759945e+00 3.000000000000000000e+00 3.113303222656250000e+02 -8.625000000000000000e+01 4.925000000000000000e+01
4.400000000000000000e+01 8.315923076923070312e+02 4.094239501953119884e+02 3.656311035156250000e-01 0.000000000000000000e+00 6.470588445663449928e-01 2.380763183593750000e+03 1.490266084671020064e+00 3.000000000000000000e+00 3.400563964843750000e+02 -8.575000000000000000e+01 4.925000000000000000e+01
6.400000000000000000e+01 7.759923076923080316e+02 4.039267578125000000e+02 1.445617675781250000e-01 0.000000000000000000e+00 2.857142857142859829e-02 2.363205566406250000e+03 1.523413896560670056e+00 4.000000000000000000e+00 3.684986877441410229e+02 -8.525000000000000000e+01 4.925000000000000000e+01
3.400000000000000000e+01 7.335846153846149491e+02 3.970148315429689774e+02 -7.650756835937500000e-02 0.000000000000000000e+00 5.714285714285709944e-02 2.345647705078119998e+03 1.773223876953119893e+00 3.000000000000000000e+00 3.455503234863280113e+02 -8.475000000000000000e+01 4.925000000000000000e+01
4.600000000000000000e+01 7.916615384615389530e+02 3.963053588867189774e+02 -2.861022949218750000e-01 0.000000000000000000e+00 2.857142857142859829e-02 2.329396972656250000e+03 8.957246541976929821e-01 4.000000000000000000e+00 3.059250793457030113e+02 -8.425000000000000000e+01 4.925000000000000000e+01
6.500000000000000000e+01 8.295846153846149491e+02 4.077998962402339771e+02 -4.613037109375000000e-01 0.000000000000000000e+00 2.857142857142859829e-02 2.317066894531250000e+03 1.114793658256530096e+00 4.000000000000000000e+00 2.957686462402339771e+02 -8.375000000000000000e+01 4.925000000000000000e+01
6.700000000000000000e+01 8.500692307692310123e+02 4.221688232421880116e+02 -6.364746093750000000e-01 0.000000000000000000e+00 0.000000000000000000e+00 2.304736816406250000e+03 1.725010275840759943e+00 4.000000000000000000e+00 2.794913024902339771e+02 -8.325000000000000000e+01 4.925000000000000000e+01
4.000000000000000000e+01 8.176307692307690331e+02 4.326007080078119884e+02 -8.116455078125000000e-01 0.000000000000000000e+00 2.857142857142859829e-02 2.292406738281250000e+03 1.356175899505619897e+00 3.000000000000000000e+00 2.633078613281250000e+02 -8.275000000000000000e+01 4.925000000000000000e+01
3.500000000000000000e+01 7.988307692307689649e+02 4.375917663574219887e+02 -9.325256347656250000e-01 0.000000000000000000e+00 2.857142857142859829e-02 2.283651611328119998e+03 1.607346534728999909e+00 3.000000000000000000e+00 2.591428527832030113e+02 -8.225000000000000000e+01 4.925000000000000000e+01
5.400000000000000000e+01 8.028461538461540385e+02 4.423493652343750000e+02 -9.990844726562500000e-01 0.000000000000000000e+00 0.000000000000000000e+00 2.278471679687500000e+03 8.361105322837829590e-01 4.000000000000000000e+00 2.402050018310550001e+02 -8.175000000000000000e+01 4.925000000000000000e+01
5.700000000000000000e+01 8.190846153846159723e+02 4.489575500488280113e+02 -1.065643310546880107e+00 0.000000000000000000e+00 0.000000000000000000e+00 2.273291748046880002e+03 8.428258895874020107e-01 4.000000000000000000e+00 2.434719238281250000e+02 -8.125000000000000000e+01 4.925000000000000000e+01
7.100000000000000000e+01 8.275461538461539703e+02 4.507461242675780113e+02 -1.132202148437500000e+00 0.000000000000000000e+00 2.857142857142859829e-02 2.268111816406250000e+03 9.965552091598509632e-01 4.000000000000000000e+00 2.756149902343750000e+02 -8.075000000000000000e+01 4.925000000000000000e+01
7.100000000000000000e+01 8.261000000000000227e+02 4.515292663574219887e+02 -1.157226562500000000e+00 0.000000000000000000e+00 0.000000000000000000e+00 2.258164062500000000e+03 8.355590105056760475e-01 4.000000000000000000e+00 3.472778320312500000e+02 -8.025000000000000000e+01 4.925000000000000000e+01
4.800000000000000000e+01 8.114230769230770193e+02 4.552044982910160229e+02 -1.168395996093750000e+00 0.000000000000000000e+00 5.714285714285709944e-02 2.246627197265619998e+03 1.819547057151789993e+00 4.000000000000000000e+00 2.970032958984380116e+02 -7.975000000000000000e+01 4.925000000000000000e+01
6.300000000000000000e+01 8.355538461538460524e+02 4.603703613281250000e+02 -1.179565429687500000e+00 0.000000000000000000e+00 0.000000000000000000e+00 2.235090087890619998e+03 9.559422135353089489e-01 4.000000000000000000e+00 3.030541687011719887e+02 -7.925000000000000000e+01 4.925000000000000000e+01
6.100000000000000000e+01 8.520000000000000000e+02 4.633320922851560226e+02 -1.190734863281250000e+00 0.000000000000000000e+00 0.000000000000000000e+00 2.223552978515619998e+03 1.288546085357670012e+00 4.000000000000000000e+00 2.821734924316410229e+02 -7.875000000000000000e+01 4.925000000000000000e+01
4.500000000000000000e+01 8.597615384615389758e+02 4.606148986816410229e+02 -1.203765869140619893e+00 0.000000000000000000e+00 2.857142857142859829e-02 2.201635498046880002e+03 1.605650305747990059e+00 4.000000000000000000e+00 2.887521362304689774e+02 -7.825000000000000000e+01 4.925000000000000000e+01
2.500000000000000000e+01 8.474846153846150401e+02 4.560327148437500000e+02 -1.216796875000000000e+00 0.000000000000000000e+00 0.000000000000000000e+00 2.179717773437500000e+03 8.380243778228759766e-01 3.000000000000000000e+00 3.131561279296880116e+02 -7.775000000000000000e+01 4.925000000000000000e+01
3.700000000000000000e+01 8.482384615384610242e+02 4.500098571777339771e+02 -1.229827880859380107e+00 0.000000000000000000e+00 5.714285714285709944e-02 2.157800048828119998e+03 8.113615512847900391e-01 3.000000000000000000e+00 2.693034057617189774e+02 -7.725000000000000000e+01 4.925000000000000000e+01
6.000000000000000000e+01 8.673615384615389985e+02 4.495261535644530113e+02 -1.252166748046880107e+00 0.000000000000000000e+00 8.571428571428570120e-02 2.134825927734380002e+03 1.473204374313350051e+00 4.000000000000000000e+00 3.101013183593750000e+02 -7.675000000000000000e+01 4.925000000000000000e+01
3.800000000000000000e+01 8.557923076923079861e+02 4.609091796875000000e+02 -1.302398681640619893e+00 0.000000000000000000e+00 2.941176593303679865e-01 2.108683105468750000e+03 1.886710047721859906e+00 3.000000000000000000e+00 3.362405090332030113e+02 -7.625000000000000000e+01 4.925000000000000000e+01
4.900000000000000000e+01 8.670000000000000000e+02 4.849335632324219887e+02 -1.352600097656250000e+00 9.999999776482580358e-03 2.857142857142859829e-02 2.082540283203119998e+03 1.981702566146849920e+00 4.000000000000000000e+00 3.981425476074219887e+02 -7.575000000000000000e+01 4.925000000000000000e+01
4.800000000000000000e+01 8.733076923076920366e+02 4.935500793457030113e+02 -1.402832031250000000e+00 9.999999776482580358e-03 5.882353186607359730e-01 2.056397460937500000e+03 1.970242381095890005e+00 4.000000000000000000e+00 3.909648437500000000e+02 -7.525000000000000000e+01 4.925000000000000000e+01
6.100000000000000000e+01 8.935769230769229807e+02 4.943325500488280113e+02 -1.459381103515619893e+00 9.999999776482580358e-03 2.941176593303679865e-01 2.033066894531250000e+03 1.963293671607970081e+00 4.000000000000000000e+00 4.352072753906250000e+02 -7.475000000000000000e+01 4.925000000000000000e+01
6.300000000000000000e+01 8.419461538461530381e+02 4.467470092773439774e+02 -1.585144042968750000e+00 0.000000000000000000e+00 5.882353186607359730e-01 1.992030639648440001e+03 1.987639188766479936e+00 4.000000000000000000e+00 4.083409423828119884e+02 -7.375000000000000000e+01 4.925000000000000000e+01
6.000000000000000000e+01 8.622153846153850054e+02 4.200051269531250000e+02 -1.648040771484380107e+00 9.999999776482580358e-03 2.941176593303679865e-01 1.971512451171880002e+03 1.976844549179080035e+00 4.000000000000000000e+00 4.407975158691410229e+02 -7.325000000000000000e+01 4.925000000000000000e+01
5.500000000000000000e+01 9.179076923076929688e+02 4.439488220214839771e+02 -1.692108154296880107e+00 0.000000000000000000e+00 2.941176593303679865e-01 1.949466430664059999e+03 8.163918256759640224e-01 4.000000000000000000e+00 2.476797790527340055e+02 -7.225000000000000000e+01 4.925000000000000000e+01
5.400000000000000000e+01 1.030892307692309942e+03 4.438976745605469887e+02 -1.708312988281250000e+00 9.999999776482580358e-03 2.857142857142859829e-02 1.939799926757809999e+03 7.982945442199710362e-01 4.000000000000000000e+00 3.686542053222660229e+02 -7.175000000000000000e+01 4.925000000000000000e+01
6.600000000000000000e+01 1.097846153846149946e+03 4.487626953125000000e+02 -1.724517822265619893e+00 0.000000000000000000e+00 0.000000000000000000e+00 1.930133422851559999e+03 1.248808979988099921e+00 4.000000000000000000e+00 4.691609191894530113e+02 -7.125000000000000000e+01 4.925000000000000000e+01
5.600000000000000000e+01 1.086607692307690058e+03 4.620738525390619884e+02 -1.678955078125000000e+00 9.999999776482580358e-03 5.882353186607359730e-01 1.935918701171880002e+03 1.920350790023799936e+00 4.000000000000000000e+00 5.749169921875000000e+02 -7.075000000000000000e+01 4.925000000000000000e+01
5.600000000000000000e+01 1.081299999999999955e+03 4.725560913085939774e+02 -1.633361816406250000e+00 9.999999776482580358e-03 8.571428571428570120e-02 1.941703979492190001e+03 1.927409648895259897e+00 4.000000000000000000e+00 5.893591918945310226e+02 -7.025000000000000000e+01 4.925000000000000000e+01
6.500000000000000000e+01 1.064407692307690013e+03 4.841303710937500000e+02 -1.587799072265619893e+00 9.999999776482580358e-03 2.857142857142859829e-02 1.947489135742190001e+03 7.925474643707279832e-01 4.000000000000000000e+00 5.067434387207030113e+02 -6.975000000000000000e+01 4.925000000000000000e+01
5.700000000000000000e+01 1.099492307692310078e+03 4.872374877929689774e+02 -1.512359619140619893e+00 0.000000000000000000e+00 0.000000000000000000e+00 1.957735595703119998e+03 8.004487156867979847e-01 4.000000000000000000e+00 3.906955566406250000e+02 -6.925000000000000000e+01 4.925000000000000000e+01
6.000000000000000000e+01 1.081007692307689922e+03 4.964739074707030113e+02 -1.347473144531250000e+00 0.000000000000000000e+00 0.000000000000000000e+00 1.981365966796880002e+03 1.774352192878720036e+00 4.000000000000000000e+00 3.123943176269530113e+02 -6.875000000000000000e+01 4.925000000000000000e+01
2.600000000000000000e+01 1.144969230769230080e+03 5.746969604492189774e+02 2.671325683593750000e+00 0.000000000000000000e+00 0.000000000000000000e+00 1.973842041015619998e+03 1.965775966644289996e+00 3.000000000000000000e+00 2.326655883789059942e+02 -5.775000000000000000e+01 4.925000000000000000e+01
3.900000000000000000e+01 9.926692307692310351e+02 5.766830444335939774e+02 2.667694091796879885e+00 0.000000000000000000e+00 0.000000000000000000e+00 1.970360107421880002e+03 1.938250780105589932e+00 3.000000000000000000e+00 7.604179382324220171e+01 -5.725000000000000000e+01 4.925000000000000000e+01
5.400000000000000000e+01 1.011946153846149969e+03 5.690430297851560226e+02 2.664093017578120115e+00 0.000000000000000000e+00 0.000000000000000000e+00 1.966878295898440001e+03 1.882570624351499911e+00 4.000000000000000000e+00 4.239625854492189774e+02 -5.675000000000000000e+01 4.925000000000000000e+01
5.700000000000000000e+01 9.954384615384619792e+02 5.529704589843750000e+02 2.660491943359379885e+00 0.000000000000000000e+00 0.000000000000000000e+00 1.963396484375000000e+03 1.834379076957699972e+00 4.000000000000000000e+00 2.131301879882809942e+02 -5.625000000000000000e+01 4.925000000000000000e+01
5.800000000000000000e+01 1.063192307692309896e+03 5.699420166015620453e+02 2.985900878906250000e+00 0.000000000000000000e+00 0.000000000000000000e+00 1.978604736328119998e+03 2.018409252166749823e+00 4.000000000000000000e+00 5.556027603149409799e+01 -5.475000000000000000e+01 4.925000000000000000e+01
5.000000000000000000e+01 1.000115384615379980e+03 5.864233398437500000e+02 3.111480712890620115e+00 0.000000000000000000e+00 0.000000000000000000e+00 1.971827270507809999e+03 2.007260799407959873e+00 4.000000000000000000e+00 9.089691925048829546e+01 -5.425000000000000000e+01 4.925000000000000000e+01
2.800000000000000000e+01 5.458846153846160405e+02 2.751961059570310226e+02 1.220703125000000000e+00 0.000000000000000000e+00 5.882353186607359730e-01 2.809464111328119998e+03 3.544561862945560193e+00 3.000000000000000000e+00 3.664909362792969887e+02 -9.925000000000000000e+01 4.975000000000000000e+01
4.700000000000000000e+01 6.080692307692310123e+02 2.728659057617189774e+02 6.387023925781250000e-01 0.000000000000000000e+00 2.571428571428570065e-01 2.702358154296880002e+03 1.353362083435059926e+00 4.000000000000000000e+00 2.861039428710939774e+02 -9.625000000000000000e+01 4.975000000000000000e+01
6.400000000000000000e+01 6.003153846153850282e+02 2.573985595703119884e+02 4.609375000000000000e-01 0.000000000000000000e+00 3.529411852359770063e-01 2.668237548828119998e+03 2.811593770980830076e+00 4.000000000000000000e+00 3.082296447753910229e+02 -9.575000000000000000e+01 4.975000000000000000e+01
2.500000000000000000e+01 6.319846153846150401e+02 2.678446655273439774e+02 2.794494628906250000e-01 0.000000000000000000e+00 2.857142857142859829e-02 2.630720214843750000e+03 1.981481075286869897e+00 3.000000000000000000e+00 3.532848510742189774e+02 -9.525000000000000000e+01 4.975000000000000000e+01
5.400000000000000000e+01 7.042923076923069630e+02 3.560596008300780113e+02 -8.602905273437500000e-02 0.000000000000000000e+00 1.142857142857140046e-01 2.553421142578119998e+03 2.221317291259770066e+00 4.000000000000000000e+00 3.680946044921880116e+02 -9.425000000000000000e+01 4.975000000000000000e+01
5.200000000000000000e+01 7.693461538461540385e+02 3.687180786132810226e+02 -3.121032714843750000e-01 0.000000000000000000e+00 0.000000000000000000e+00 2.490046630859380002e+03 1.696764111518860085e+00 4.000000000000000000e+00 3.764473876953119884e+02 -9.325000000000000000e+01 4.975000000000000000e+01
5.900000000000000000e+01 8.092923076923079861e+02 3.804216308593750000e+02 -4.100341796875000000e-01 0.000000000000000000e+00 2.857142857142859829e-02 2.420236328125000000e+03 2.130308628082279832e+00 4.000000000000000000e+00 4.108291015625000000e+02 -9.175000000000000000e+01 4.975000000000000000e+01
3.200000000000000000e+01 8.251230769230769511e+02 3.734816589355469887e+02 -3.251342773437500000e-01 0.000000000000000000e+00 0.000000000000000000e+00 2.412970947265619998e+03 1.226900100708010033e+00 3.000000000000000000e+00 4.232942199707030113e+02 -9.125000000000000000e+01 4.975000000000000000e+01
6.300000000000000000e+01 8.269923076923080316e+02 3.586122436523439774e+02 -1.553039550781250000e-01 0.000000000000000000e+00 2.857142857142859760e-01 2.398439697265619998e+03 2.016369819641110173e+00 4.000000000000000000e+00 4.526364440917969887e+02 -9.025000000000000000e+01 4.975000000000000000e+01
3.400000000000000000e+01 8.188230769230769965e+02 3.442863464355469887e+02 -1.107482910156250000e-01 0.000000000000000000e+00 2.941176593303679865e-01 2.353338867187500000e+03 1.999331474304200107e+00 3.000000000000000000e+00 4.422583923339839771e+02 -8.975000000000000000e+01 4.975000000000000000e+01
6.700000000000000000e+01 7.867846153846149946e+02 3.701720581054689774e+02 -1.309204101562500000e-01 0.000000000000000000e+00 2.857142857142859829e-02 2.127083251953119998e+03 1.936460852622990059e+00 4.000000000000000000e+00 3.417568054199219887e+02 -8.775000000000000000e+01 4.975000000000000000e+01
3.800000000000000000e+01 7.707230769230769738e+02 3.897144165039060226e+02 -1.762390136718750000e-01 0.000000000000000000e+00 1.428571428571429880e-01 2.184799316406250000e+03 1.961840748786930044e+00 3.000000000000000000e+00 3.567284545898439774e+02 -8.725000000000000000e+01 4.975000000000000000e+01
6.000000000000000000e+01 7.631307692307690331e+02 3.979988098144530113e+02 -2.215270996093750000e-01 0.000000000000000000e+00 1.428571428571429880e-01 2.242515380859380002e+03 1.967552900314329944e+00 4.000000000000000000e+00 3.391959838867189774e+02 -8.675000000000000000e+01 4.975000000000000000e+01
3.800000000000000000e+01 7.690076923076919684e+02 4.022672729492189774e+02 -2.668457031250000000e-01 0.000000000000000000e+00 8.571428571428570120e-02 2.300231445312500000e+03 1.989164829254149947e+00 3.000000000000000000e+00 3.352409362792969887e+02 -8.625000000000000000e+01 4.975000000000000000e+01
3.000000000000000000e+01 7.343230769230769965e+02 4.037969360351560226e+02 -6.035156250000000000e-01 0.000000000000000000e+00 0.000000000000000000e+00 2.277732177734380002e+03 1.254659652709960049e+00 3.000000000000000000e+00 2.367754821777340055e+02 -8.525000000000000000e+01 4.975000000000000000e+01
5.700000000000000000e+01 7.155846153846159723e+02 4.018311767578119884e+02 -7.718505859375000000e-01 0.000000000000000000e+00 0.000000000000000000e+00 2.266482421875000000e+03 8.211613893508910023e-01 4.000000000000000000e+00 2.609778137207030113e+02 -8.475000000000000000e+01 4.975000000000000000e+01
4.300000000000000000e+01 7.747692307692300346e+02 4.121931762695310226e+02 -1.013275146484380107e+00 0.000000000000000000e+00 0.000000000000000000e+00 2.251428955078119998e+03 1.021412968635559970e+00 3.000000000000000000e+00 2.494102630615230112e+02 -8.375000000000000000e+01 4.975000000000000000e+01
6.800000000000000000e+01 8.006769230769230035e+02 4.253648681640619884e+02 -1.105407714843750000e+00 0.000000000000000000e+00 2.857142857142859829e-02 2.246135986328119998e+03 1.852591872215270108e+00 4.000000000000000000e+00 2.247770538330080115e+02 -8.325000000000000000e+01 4.975000000000000000e+01
6.400000000000000000e+01 7.995076923076919684e+02 4.360359191894530113e+02 -1.197540283203119893e+00 0.000000000000000000e+00 2.857142857142859829e-02 2.240843017578119998e+03 2.027420520782469815e+00 4.000000000000000000e+00 2.343563842773440058e+02 -8.275000000000000000e+01 4.975000000000000000e+01
5.700000000000000000e+01 7.812230769230769738e+02 4.381923217773439774e+02 -1.256927490234380107e+00 0.000000000000000000e+00 5.714285714285709944e-02 2.236559326171880002e+03 2.027818918228149858e+00 4.000000000000000000e+00 2.167595672607419885e+02 -8.225000000000000000e+01 4.975000000000000000e+01
3.800000000000000000e+01 8.048923076923080089e+02 4.367010192871089771e+02 -1.283569335937500000e+00 0.000000000000000000e+00 2.857142857142859829e-02 2.233285156250000000e+03 2.011918067932129794e+00 3.000000000000000000e+00 2.290163726806640057e+02 -8.175000000000000000e+01 4.975000000000000000e+01
5.600000000000000000e+01 7.781461538461539931e+02 4.373389282226560226e+02 -1.310211181640619893e+00 9.999999776482580358e-03 5.714285714285709944e-02 2.230010742187500000e+03 2.002232551574710140e+00 4.000000000000000000e+00 2.536879425048830115e+02 -8.125000000000000000e+01 4.975000000000000000e+01
6.700000000000000000e+01 7.955615384615390440e+02 4.394438781738280113e+02 -1.336853027343750000e+00 9.999999776482580358e-03 2.857142857142859829e-02 2.226736328125000000e+03 1.982048749923710051e+00 4.000000000000000000e+00 2.785103149414060226e+02 -8.075000000000000000e+01 4.975000000000000000e+01
4.800000000000000000e+01 8.109846153846159496e+02 4.451577148437500000e+02 -1.362884521484380107e+00 9.999999776482580358e-03 0.000000000000000000e+00 2.215592041015619998e+03 1.960560798645019975e+00 4.000000000000000000e+00 3.042842407226560226e+02 -8.025000000000000000e+01 4.975000000000000000e+01
6.200000000000000000e+01 7.833999999999999773e+02 4.496529541015619884e+02 -1.388732910156250000e+00 9.999999776482580358e-03 0.000000000000000000e+00 2.201823974609380002e+03 1.965013027191160111e+00 4.000000000000000000e+00 3.065294799804689774e+02 -7.975000000000000000e+01 4.975000000000000000e+01
2.200000000000000000e+01 7.979076923076929688e+02 4.494380187988280113e+02 -1.414550781250000000e+00 9.999999776482580358e-03 5.882352963089940157e-02 2.188056152343750000e+03 1.951460123062130014e+00 3.000000000000000000e+00 2.664639587402339771e+02 -7.925000000000000000e+01 4.975000000000000000e+01
5.000000000000000000e+01 8.156461538461539931e+02 4.473569335937500000e+02 -1.440399169921880107e+00 9.999999776482580358e-03 2.857142857142859829e-02 2.174288330078119998e+03 1.939147353172300026e+00 4.000000000000000000e+00 2.794148559570310226e+02 -7.875000000000000000e+01 4.975000000000000000e+01
6.000000000000000000e+01 8.192230769230769738e+02 4.439325561523439774e+02 -1.507812500000000000e+00 9.999999776482580358e-03 0.000000000000000000e+00 2.146956787109380002e+03 1.939950585365300073e+00 4.000000000000000000e+00 2.680431823730469887e+02 -7.825000000000000000e+01 4.975000000000000000e+01
5.200000000000000000e+01 8.235615384615380208e+02 4.411619873046880116e+02 -1.575256347656250000e+00 9.999999776482580358e-03 0.000000000000000000e+00 2.119625000000000000e+03 1.946288347244260031e+00 4.000000000000000000e+00 2.683289489746089771e+02 -7.775000000000000000e+01 4.975000000000000000e+01
4.400000000000000000e+01 8.403076923076929461e+02 4.577183532714839771e+02 -1.807769775390619893e+00 9.999999776482580358e-03 8.571428571428570120e-02 2.035338500976559999e+03 1.958413243293759987e+00 3.000000000000000000e+00 3.020298156738280113e+02 -7.625000000000000000e+01 4.975000000000000000e+01
6.000000000000000000e+01 8.437307692307699654e+02 4.807890014648439774e+02 -1.899383544921880107e+00 9.999999776482580358e-03 1.142857142857140046e-01 2.006173461914059999e+03 1.962711095809940076e+00 4.000000000000000000e+00 3.306724243164060226e+02 -7.575000000000000000e+01 4.975000000000000000e+01
5.600000000000000000e+01 8.969461538461539476e+02 5.026189880371089771e+02 -2.072387695312500000e+00 9.999999776482580358e-03 5.714285714285709944e-02 1.951080200195309999e+03 1.934033989906309925e+00 4.000000000000000000e+00 3.816011657714839771e+02 -7.475000000000000000e+01 4.975000000000000000e+01
4.200000000000000000e+01 8.494923076923070084e+02 4.739324035644530113e+02 -2.214691162109379885e+00 9.999999776482580358e-03 1.714285714285710138e-01 1.905697509765619998e+03 1.947341084480290085e+00 3.000000000000000000e+00 4.533539428710939774e+02 -7.375000000000000000e+01 4.975000000000000000e+01
4.500000000000000000e+01 8.595846153846159723e+02 4.435782775878910229e+02 -2.285827636718750000e+00 9.999999776482580358e-03 8.823529481887819603e-01 1.883006103515619998e+03 1.951697826385500045e+00 4.000000000000000000e+00 3.982277526855469887e+02 -7.325000000000000000e+01 4.975000000000000000e+01
4.700000000000000000e+01 8.707461538461540158e+02 4.408283691406250000e+02 -2.299407958984379885e+00 9.999999776482580358e-03 9.411764740943909802e-01 1.869687377929690001e+03 1.957413792610170011e+00 4.000000000000000000e+00 3.992044067382810226e+02 -7.275000000000000000e+01 4.975000000000000000e+01
6.200000000000000000e+01 9.015230769230770420e+02 4.548774414062500000e+02 -2.293792724609379885e+00 9.999999776482580358e-03 8.823529481887819603e-01 1.859492797851559999e+03 1.279251337051390047e+00 4.000000000000000000e+00 4.625705566406250000e+02 -7.225000000000000000e+01 4.975000000000000000e+01
6.300000000000000000e+01 1.002930769230770011e+03 4.679006347656250000e+02 -2.282592773437500000e+00 9.999999776482580358e-03 5.714285714285709944e-02 1.839103515625000000e+03 1.892206907272339977e+00 4.000000000000000000e+00 3.762293090820310226e+02 -7.125000000000000000e+01 4.975000000000000000e+01
5.800000000000000000e+01 1.013338461538460024e+03 4.781552429199219887e+02 -2.172180175781250000e+00 9.999999776482580358e-03 2.941176593303679865e-01 1.846230346679690001e+03 1.905971765518190031e+00 4.000000000000000000e+00 4.203083496093750000e+02 -7.025000000000000000e+01 4.975000000000000000e+01
5.300000000000000000e+01 1.021176923076920048e+03 4.911379089355469887e+02 -2.116973876953120115e+00 9.999999776482580358e-03 5.714285714285709944e-02 1.849793701171880002e+03 1.915084004402159978e+00 4.000000000000000000e+00 4.721861877441410229e+02 -6.975000000000000000e+01 4.975000000000000000e+01
4.700000000000000000e+01 1.063730769230769965e+03 4.922623596191410229e+02 -2.039581298828120115e+00 9.999999776482580358e-03 0.000000000000000000e+00 1.857255615234380002e+03 1.918782591819760075e+00 4.000000000000000000e+00 4.650480957031250000e+02 -6.925000000000000000e+01 4.975000000000000000e+01
5.800000000000000000e+01 1.112469230769230080e+03 5.017611083984380116e+02 -1.895660400390619893e+00 9.999999776482580358e-03 0.000000000000000000e+00 1.876413208007809999e+03 1.481661796569820000e+00 4.000000000000000000e+00 3.908692932128910229e+02 -6.875000000000000000e+01 4.975000000000000000e+01
6.900000000000000000e+01 1.151569230769229989e+03 5.096612548828119884e+02 -1.751739501953119893e+00 0.000000000000000000e+00 0.000000000000000000e+00 1.895570800781250000e+03 1.205775856971740057e+00 4.000000000000000000e+00 2.400180816650390057e+02 -6.825000000000000000e+01 4.975000000000000000e+01
5.200000000000000000e+01 1.183307692307690104e+03 5.241023559570310226e+02 -1.607788085937500000e+00 9.999999776482580358e-03 0.000000000000000000e+00 1.914728393554690001e+03 8.845574855804440029e-01 4.000000000000000000e+00 3.959343872070310226e+02 -6.775000000000000000e+01 4.975000000000000000e+01
3.600000000000000000e+01 1.102038461538460069e+03 5.454369506835939774e+02 2.111419677734379885e+00 0.000000000000000000e+00 0.000000000000000000e+00 1.801293579101559999e+03 1.417906641960140046e+00 3.000000000000000000e+00 4.213221435546880116e+02 -5.725000000000000000e+01 4.975000000000000000e+01
6.100000000000000000e+01 1.013200000000000045e+03 4.674744873046880116e+02 2.129089355468750000e+00 0.000000000000000000e+00 0.000000000000000000e+00 1.778884765625000000e+03 1.911160230636600010e+00 4.000000000000000000e+00 2.192006835937500000e+02 -5.625000000000000000e+01 4.975000000000000000e+01
5.000000000000000000e+00 5.178076923076920366e+02 2.913845520019530113e+02 7.048950195312500000e-01 0.000000000000000000e+00 1.000000000000000000e+00 2.709289550781250000e+03 3.319294691085819871e+00 1.000000000000000000e+00 5.362920532226560226e+02 -9.975000000000000000e+01 5.025000000000000000e+01
7.000000000000000000e+00 5.623384615384619565e+02 3.082626037597660229e+02 7.152709960937500000e-01 0.000000000000000000e+00 1.352941155433649900e+00 2.711467041015619998e+03 3.498886108398440165e+00 1.000000000000000000e+00 2.693195800781250000e+02 -9.875000000000000000e+01 5.025000000000000000e+01
5.100000000000000000e+01 5.888461538461540385e+02 2.925363159179689774e+02 1.934204101562500000e-01 0.000000000000000000e+00 1.882352948188779962e+00 2.614773925781250000e+03 3.475214004516599786e+00 4.000000000000000000e+00 2.620137329101560226e+02 -9.625000000000000000e+01 5.025000000000000000e+01
3.400000000000000000e+01 5.690769230769240039e+02 2.880419921875000000e+02 3.683471679687500000e-02 0.000000000000000000e+00 5.714285714285709944e-02 2.583526367187500000e+03 1.767179250717159977e+00 3.000000000000000000e+00 2.873534240722660229e+02 -9.575000000000000000e+01 5.025000000000000000e+01
3.600000000000000000e+01 7.404000000000010004e+02 3.587026062011719887e+02 -7.033386230468750000e-01 0.000000000000000000e+00 2.857142857142859829e-02 2.430485351562500000e+03 2.173440694808959961e+00 3.000000000000000000e+00 3.518890686035160229e+02 -9.375000000000000000e+01 5.025000000000000000e+01
5.400000000000000000e+01 7.738538461538460069e+02 3.591781921386719887e+02 -7.624816894531250000e-01 0.000000000000000000e+00 2.857142857142859829e-02 2.405008300781250000e+03 1.475156188011170100e+00 4.000000000000000000e+00 3.879830017089839771e+02 -9.325000000000000000e+01 5.025000000000000000e+01
4.100000000000000000e+01 8.297769230769230262e+02 3.935461120605469887e+02 -8.770446777343750000e-01 0.000000000000000000e+00 2.857142857142859829e-02 2.320195068359380002e+03 1.804097294807430085e+00 3.000000000000000000e+00 4.014730224609380116e+02 -9.125000000000000000e+01 5.025000000000000000e+01
6.800000000000000000e+01 8.326769230769230035e+02 3.773595275878910229e+02 -8.385314941406250000e-01 0.000000000000000000e+00 1.428571428571429880e-01 2.308394287109380002e+03 1.964043498039250046e+00 4.000000000000000000e+00 4.446458435058589771e+02 -9.075000000000000000e+01 5.025000000000000000e+01
6.300000000000000000e+01 8.126000000000000227e+02 3.257697753906250000e+02 -7.849121093750000000e-01 0.000000000000000000e+00 2.352941185235979948e-01 2.273667236328119998e+03 1.985110521316530097e+00 4.000000000000000000e+00 4.269435424804689774e+02 -8.975000000000000000e+01 5.025000000000000000e+01
5.800000000000000000e+01 7.443615384615389985e+02 3.862264709472660229e+02 -9.557189941406250000e-01 9.999999776482580358e-03 8.571428571428570120e-02 2.181265380859380002e+03 1.135110855102539951e+00 4.000000000000000000e+00 3.257294311523439774e+02 -8.725000000000000000e+01 5.025000000000000000e+01
5.200000000000000000e+01 7.380692307692310123e+02 3.948738403320310226e+02 -1.038055419921880107e+00 9.999999776482580358e-03 5.714285714285709944e-02 2.191703613281250000e+03 1.962842345237729935e+00 4.000000000000000000e+00 3.208587646484380116e+02 -8.675000000000000000e+01 5.025000000000000000e+01
4.500000000000000000e+01 7.242769230769230262e+02 3.976549987792969887e+02 -1.120422363281250000e+00 9.999999776482580358e-03 0.000000000000000000e+00 2.202142089843750000e+03 1.620854377746580033e+00 4.000000000000000000e+00 2.951089477539060226e+02 -8.625000000000000000e+01 5.025000000000000000e+01
6.800000000000000000e+01 7.219846153846150401e+02 3.990342102050780113e+02 -1.235992431640619893e+00 0.000000000000000000e+00 8.571428571428570120e-02 2.197200195312500000e+03 8.131636381149289772e-01 4.000000000000000000e+00 2.240104522705080115e+02 -8.575000000000000000e+01 5.025000000000000000e+01
6.700000000000000000e+01 7.077153846153839822e+02 4.012797546386719887e+02 -1.351593017578119893e+00 0.000000000000000000e+00 8.571428571428570120e-02 2.192258544921880002e+03 1.466704726219179911e+00 4.000000000000000000e+00 1.768047943115230112e+02 -8.525000000000000000e+01 5.025000000000000000e+01
6.700000000000000000e+01 6.974384615384619792e+02 4.036521606445310226e+02 -1.467193603515619893e+00 0.000000000000000000e+00 0.000000000000000000e+00 2.187316894531250000e+03 1.718964338302610084e+00 4.000000000000000000e+00 1.425098724365230112e+02 -8.475000000000000000e+01 5.025000000000000000e+01
1.500000000000000000e+01 7.010692307692310123e+02 4.087977600097660229e+02 -1.556182861328119893e+00 0.000000000000000000e+00 0.000000000000000000e+00 2.184046630859380002e+03 1.670536398887630058e+00 1.000000000000000000e+00 1.053403091430659941e+02 -8.425000000000000000e+01 5.025000000000000000e+01
6.900000000000000000e+01 7.279230769230770193e+02 4.142916564941410229e+02 -1.565246582031250000e+00 0.000000000000000000e+00 0.000000000000000000e+00 2.185790771484380002e+03 1.836229920387270065e+00 4.000000000000000000e+00 1.735150604248050001e+02 -8.375000000000000000e+01 5.025000000000000000e+01
5.800000000000000000e+01 7.406384615384620247e+02 4.205897521972660229e+02 -1.574340820312500000e+00 0.000000000000000000e+00 0.000000000000000000e+00 2.187535156250000000e+03 2.013351678848270154e+00 4.000000000000000000e+00 1.664856567382809942e+02 -8.325000000000000000e+01 5.025000000000000000e+01
6.000000000000000000e+00 7.435000000000000000e+02 4.238979187011719887e+02 -1.581359863281250000e+00 0.000000000000000000e+00 8.571428571428570120e-02 2.189467041015619998e+03 2.036356687545779920e+00 1.000000000000000000e+00 1.001376342773440058e+02 -8.225000000000000000e+01 5.025000000000000000e+01
4.000000000000000000e+01 7.427307692307690559e+02 4.187189636230469887e+02 -1.568054199218750000e+00 0.000000000000000000e+00 8.571428571428570120e-02 2.188098388671880002e+03 2.018383979797360173e+00 3.000000000000000000e+00 1.031742706298829972e+02 -8.175000000000000000e+01 5.025000000000000000e+01
3.300000000000000000e+01 7.439461538461539476e+02 4.067474975585939774e+02 -1.554779052734380107e+00 9.999999776482580358e-03 1.142857142857140046e-01 2.186729736328119998e+03 1.994121909141540083e+00 3.000000000000000000e+00 1.849921569824219887e+02 -8.125000000000000000e+01 5.025000000000000000e+01
5.700000000000000000e+01 7.369846153846150401e+02 3.945684204101560226e+02 -1.541503906250000000e+00 9.999999776482580358e-03 2.857142857142859829e-02 2.185360839843750000e+03 1.974457144737240100e+00 4.000000000000000000e+00 2.395321960449219887e+02 -8.075000000000000000e+01 5.025000000000000000e+01
4.800000000000000000e+01 7.524307692307689877e+02 3.956373596191410229e+02 -1.609069824218750000e+00 9.999999776482580358e-03 2.857142857142859829e-02 2.157020996093750000e+03 1.938115000724790038e+00 4.000000000000000000e+00 2.690936279296880116e+02 -7.975000000000000000e+01 5.025000000000000000e+01
2.500000000000000000e+01 7.565307692307690104e+02 4.149326477050780113e+02 -1.649566650390619893e+00 9.999999776482580358e-03 5.882352963089940157e-02 2.141022216796880002e+03 7.859046459198000267e-01 3.000000000000000000e+00 2.536848297119140057e+02 -7.925000000000000000e+01 5.025000000000000000e+01
5.800000000000000000e+01 7.699230769230770193e+02 4.263926086425780113e+02 -1.690063476562500000e+00 9.999999776482580358e-03 6.470588445663449928e-01 2.125023681640619998e+03 1.186261773109440032e+00 4.000000000000000000e+00 2.777930603027339771e+02 -7.875000000000000000e+01 5.025000000000000000e+01
4.200000000000000000e+01 7.836615384615380435e+02 4.328243103027339771e+02 -1.811859130859380107e+00 9.999999776482580358e-03 2.857142857142859829e-02 2.092278076171880002e+03 1.003309369087219904e+00 3.000000000000000000e+00 2.619602050781250000e+02 -7.825000000000000000e+01 5.025000000000000000e+01
2.800000000000000000e+01 7.961461538461539931e+02 4.358418273925780113e+02 -1.933685302734380107e+00 9.999999776482580358e-03 0.000000000000000000e+00 2.059532470703119998e+03 1.536647200584410067e+00 3.000000000000000000e+00 2.560854492187500000e+02 -7.775000000000000000e+01 5.025000000000000000e+01
4.100000000000000000e+01 8.124769230769229580e+02 4.377636108398439774e+02 -2.055480957031250000e+00 9.999999776482580358e-03 2.857142857142859829e-02 2.026786865234380002e+03 1.909842729568479891e+00 3.000000000000000000e+00 2.616852416992189774e+02 -7.725000000000000000e+01 5.025000000000000000e+01
5.200000000000000000e+01 8.184384615384609560e+02 4.591891784667969887e+02 -2.313140869140620115e+00 9.999999776482580358e-03 1.000000000000000000e+00 1.961993774414059999e+03 1.926665902137759900e+00 4.000000000000000000e+00 3.295102233886719887e+02 -7.625000000000000000e+01 5.025000000000000000e+01
2.300000000000000000e+01 8.455923076923080544e+02 4.833535766601560226e+02 -2.446166992187500000e+00 9.999999776482580358e-03 5.882353186607359730e-01 1.929806640625000000e+03 1.926473975181580034e+00 3.000000000000000000e+00 3.473002319335939774e+02 -7.575000000000000000e+01 5.025000000000000000e+01
6.600000000000000000e+01 8.784538461538470528e+02 5.025746459960939774e+02 -2.685424804687500000e+00 9.999999776482580358e-03 2.941176593303679865e-01 1.869093627929690001e+03 1.393818616867070093e+00 4.000000000000000000e+00 3.796215209960939774e+02 -7.475000000000000000e+01 5.025000000000000000e+01
2.400000000000000000e+01 8.836923076923079634e+02 5.016830749511719887e+02 -2.764801025390620115e+00 9.999999776482580358e-03 2.857142857142859829e-02 1.844229003906250000e+03 1.103775382041930042e+00 3.000000000000000000e+00 4.023025512695310226e+02 -7.425000000000000000e+01 5.025000000000000000e+01
5.300000000000000000e+01 8.959307692307689877e+02 4.898930358886719887e+02 -2.844207763671879885e+00 1.030258163809780053e-01 2.941176593303679865e-01 1.819364379882809999e+03 1.811505556106570047e+00 4.000000000000000000e+00 4.420063781738280113e+02 -7.375000000000000000e+01 5.025000000000000000e+01
5.400000000000000000e+01 9.149384615384619792e+02 4.709154052734380116e+02 -2.923614501953120115e+00 9.999999776482580358e-03 1.714285714285710138e-01 1.794499877929690001e+03 1.861022830009460005e+00 4.000000000000000000e+00 4.498727722167969887e+02 -7.325000000000000000e+01 5.025000000000000000e+01
5.500000000000000000e+01 9.303538461538470301e+02 4.592142028808589771e+02 -2.922882080078120115e+00 1.045278161764140040e-01 6.470588445663449928e-01 1.780241699218750000e+03 1.588185787200929955e+00 4.000000000000000000e+00 4.514704284667969887e+02 -7.275000000000000000e+01 5.025000000000000000e+01
6.900000000000000000e+01 1.003523076923079998e+03 4.516660461425780113e+02 -2.868072509765620115e+00 1.776345223188399991e-01 6.470588445663449928e-01 1.758796264648440001e+03 1.806645035743710048e+00 4.000000000000000000e+00 6.245886840820310226e+02 -7.175000000000000000e+01 5.025000000000000000e+01
4.300000000000000000e+01 9.947769230769230262e+02 4.536697387695310226e+02 -2.775817871093750000e+00 1.329844295978550028e-01 2.941176593303679865e-01 1.749415161132809999e+03 1.826298594474790038e+00 3.000000000000000000e+00 5.385020141601560226e+02 -7.075000000000000000e+01 5.025000000000000000e+01
6.000000000000000000e+01 1.028446153846150082e+03 4.546351318359380116e+02 -2.710998535156250000e+00 1.335572302341460071e-01 2.941176593303679865e-01 1.750756713867190001e+03 1.826424717903140094e+00 4.000000000000000000e+00 6.035090942382810226e+02 -7.025000000000000000e+01 5.025000000000000000e+01
5.400000000000000000e+01 1.034361538461540022e+03 4.596755371093750000e+02 -2.646148681640620115e+00 9.999999776482580358e-03 8.571428571428570120e-02 1.752098266601559999e+03 1.842605710029600052e+00 4.000000000000000000e+00 5.490084228515620453e+02 -6.975000000000000000e+01 5.025000000000000000e+01
6.400000000000000000e+01 1.107461538461539931e+03 4.941447448730469887e+02 -2.443847656250000000e+00 1.102127730846410025e-01 0.000000000000000000e+00 1.771460571289059999e+03 1.871564984321590019e+00 4.000000000000000000e+00 5.236289062500000000e+02 -6.875000000000000000e+01 5.025000000000000000e+01
2.800000000000000000e+01 1.146507692307689922e+03 5.132465209960939774e+02 -2.320892333984379885e+00 9.999999776482580358e-03 2.941176593303679865e-01 1.786145385742190001e+03 1.840444922447199927e+00 3.000000000000000000e+00 4.812283325195310226e+02 -6.825000000000000000e+01 5.025000000000000000e+01
5.700000000000000000e+01 1.199653846153850054e+03 5.271332397460939774e+02 -2.197967529296879885e+00 9.999999776482580358e-03 0.000000000000000000e+00 1.800830200195309999e+03 1.828104972839359910e+00 4.000000000000000000e+00 5.812657470703120453e+02 -6.775000000000000000e+01 5.025000000000000000e+01
7.000000000000000000e+01 1.222584615384620065e+03 5.355349731445310226e+02 -2.011657714843750000e+00 9.999999776482580358e-03 0.000000000000000000e+00 1.819136962890619998e+03 9.242001771926879883e-01 4.000000000000000000e+00 4.546514892578119884e+02 -6.725000000000000000e+01 5.025000000000000000e+01
5.800000000000000000e+01 1.081500000000000000e+03 5.119077453613280113e+02 1.555145263671880107e+00 0.000000000000000000e+00 0.000000000000000000e+00 1.632227050781250000e+03 1.274054050445559971e+00 4.000000000000000000e+00 2.671199645996089771e+02 -5.725000000000000000e+01 5.025000000000000000e+01
5.500000000000000000e+01 1.094469230769230080e+03 5.139711914062500000e+02 1.576416015625000000e+00 0.000000000000000000e+00 0.000000000000000000e+00 1.613300170898440001e+03 1.524408698081969993e+00 4.000000000000000000e+00 3.764827270507810226e+02 -5.675000000000000000e+01 5.025000000000000000e+01
6.200000000000000000e+01 5.573769230769230489e+02 2.713637390136719887e+02 3.733520507812500000e-01 0.000000000000000000e+00 2.352941185235979948e-01 2.641039306640619998e+03 9.145859479904170364e-01 4.000000000000000000e+00 6.901782226562500000e+02 -9.975000000000000000e+01 5.075000000000000000e+01
2.200000000000000000e+01 5.415307692307690104e+02 2.741268920898439774e+02 4.304504394531250000e-01 0.000000000000000000e+00 2.941176593303679865e-01 2.649975830078119998e+03 2.879628658294679955e+00 3.000000000000000000e+00 3.066116333007810226e+02 -9.925000000000000000e+01 5.075000000000000000e+01
2.300000000000000000e+01 5.350076923076919684e+02 2.690776672363280113e+02 2.544860839843750000e-01 0.000000000000000000e+00 2.352941185235979948e-01 2.630026123046880002e+03 3.420057535171510121e+00 3.000000000000000000e+00 2.742057800292969887e+02 -9.775000000000000000e+01 5.075000000000000000e+01
5.300000000000000000e+01 5.950923076923080544e+02 2.830734252929689774e+02 -3.453063964843750000e-01 0.000000000000000000e+00 8.571428571428570120e-02 2.513784667968750000e+03 9.010481834411619984e-01 4.000000000000000000e+00 2.980043334960939774e+02 -9.575000000000000000e+01 5.075000000000000000e+01
4.800000000000000000e+01 6.860692307692310123e+02 2.876994323730469887e+02 -8.962402343750000000e-01 0.000000000000000000e+00 5.714285714285709944e-02 2.401716064453119998e+03 1.226295709609990014e+00 4.000000000000000000e+00 3.873338012695310226e+02 -9.425000000000000000e+01 5.075000000000000000e+01
5.400000000000000000e+01 7.320538461538469619e+02 2.810459594726560226e+02 -1.081756591796880107e+00 0.000000000000000000e+00 8.571428571428570120e-02 2.363896728515619998e+03 1.336266398429869939e+00 4.000000000000000000e+00 3.902479248046880116e+02 -9.375000000000000000e+01 5.075000000000000000e+01
6.400000000000000000e+01 7.743923076923080089e+02 2.901501770019530113e+02 -1.154754638671880107e+00 0.000000000000000000e+00 2.857142857142859829e-02 2.337639160156250000e+03 1.261746644973749998e+00 4.000000000000000000e+00 3.757003173828119884e+02 -9.325000000000000000e+01 5.075000000000000000e+01
6.300000000000000000e+01 7.913615384615389985e+02 3.216437377929689774e+02 -1.227752685546880107e+00 0.000000000000000000e+00 5.714285714285709944e-02 2.311381835937500000e+03 1.342352271080019976e+00 4.000000000000000000e+00 4.201398315429689774e+02 -9.275000000000000000e+01 5.075000000000000000e+01
5.800000000000000000e+01 8.072000000000000455e+02 3.560328063964839771e+02 -1.300720214843750000e+00 0.000000000000000000e+00 5.714285714285709944e-02 2.285124511718750000e+03 8.588914871215820312e-01 4.000000000000000000e+00 4.399709472656250000e+02 -9.225000000000000000e+01 5.075000000000000000e+01
6.000000000000000000e+01 8.297307692307699654e+02 3.726782836914060226e+02 -1.355712890625000000e+00 0.000000000000000000e+00 8.571428571428570120e-02 2.261667968750000000e+03 1.475813269615170009e+00 4.000000000000000000e+00 3.974946899414060226e+02 -9.175000000000000000e+01 5.075000000000000000e+01
6.100000000000000000e+01 8.171384615384610015e+02 2.987705078125000000e+02 -1.374359130859380107e+00 9.999999776482580358e-03 5.294117927551269531e-01 2.202395751953119998e+03 1.965211153030399949e+00 4.000000000000000000e+00 3.753635864257810226e+02 -8.975000000000000000e+01 5.075000000000000000e+01
3.300000000000000000e+01 7.912307692307690559e+02 2.930891723632810226e+02 -1.404876708984380107e+00 9.999999776482580358e-03 5.294117927551269531e-01 2.189227050781250000e+03 7.943789362907409668e-01 3.000000000000000000e+00 3.765173950195310226e+02 -8.925000000000000000e+01 5.075000000000000000e+01
5.300000000000000000e+01 7.520000000000000000e+02 3.232758178710939774e+02 -1.465911865234380107e+00 9.999999776482580358e-03 5.714285714285709944e-02 2.162890136718750000e+03 7.913038730621340111e-01 4.000000000000000000e+00 3.374079895019530113e+02 -8.825000000000000000e+01 5.075000000000000000e+01
4.600000000000000000e+01 7.365076923076919684e+02 3.452514648437500000e+02 -1.543914794921880107e+00 9.999999776482580358e-03 2.352941185235979948e-01 2.151469726562500000e+03 7.919994592666630417e-01 4.000000000000000000e+00 3.156413879394530113e+02 -8.775000000000000000e+01 5.075000000000000000e+01
5.000000000000000000e+01 7.288692307692299437e+02 3.642797851562500000e+02 -1.637786865234380107e+00 9.999999776482580358e-03 2.857142857142859829e-02 2.140631835937500000e+03 7.929403185844420276e-01 4.000000000000000000e+00 2.930101318359380116e+02 -8.725000000000000000e+01 5.075000000000000000e+01
3.800000000000000000e+01 7.236769230769230035e+02 3.779062805175780113e+02 -1.731658935546880107e+00 9.999999776482580358e-03 2.857142857142859829e-02 2.129793945312500000e+03 7.971828579902650036e-01 3.000000000000000000e+00 2.756517639160160229e+02 -8.675000000000000000e+01 5.075000000000000000e+01
7.300000000000000000e+01 7.072769230769230262e+02 3.860007019042969887e+02 -1.825531005859380107e+00 9.999999776482580358e-03 0.000000000000000000e+00 2.118956298828119998e+03 7.991359233856200062e-01 4.000000000000000000e+00 2.437301483154300001e+02 -8.625000000000000000e+01 5.075000000000000000e+01
5.500000000000000000e+01 6.961307692307690331e+02 3.913004150390619884e+02 -1.892486572265619893e+00 9.999999776482580358e-03 1.176470592617989974e-01 2.117810791015619998e+03 1.568650126457209915e+00 4.000000000000000000e+00 1.853336334228519888e+02 -8.575000000000000000e+01 5.075000000000000000e+01
5.800000000000000000e+01 6.843615384615389985e+02 3.964750671386719887e+02 -1.959442138671880107e+00 0.000000000000000000e+00 0.000000000000000000e+00 2.116665283203119998e+03 1.855738878250120072e+00 4.000000000000000000e+00 1.551781311035159945e+02 -8.525000000000000000e+01 5.075000000000000000e+01
6.100000000000000000e+01 6.831307692307690331e+02 4.020956420898439774e+02 -2.026367187500000000e+00 0.000000000000000000e+00 8.571428571428570120e-02 2.115519775390619998e+03 1.553058862686159891e+00 4.000000000000000000e+00 1.339120788574219887e+02 -8.475000000000000000e+01 5.075000000000000000e+01
2.300000000000000000e+01 6.748384615384619565e+02 4.083944702148439774e+02 -2.062835693359379885e+00 0.000000000000000000e+00 0.000000000000000000e+00 2.116220947265619998e+03 1.998725771903989923e+00 3.000000000000000000e+00 1.064923095703120026e+02 -8.425000000000000000e+01 5.075000000000000000e+01
6.000000000000000000e+01 6.858384615384610470e+02 4.111935119628910229e+02 -2.007812500000000000e+00 0.000000000000000000e+00 2.857142857142859829e-02 2.122462890625000000e+03 1.980317711830140048e+00 4.000000000000000000e+00 1.116545715332029971e+02 -8.375000000000000000e+01 5.075000000000000000e+01
1.100000000000000000e+01 6.940692307692310123e+02 4.101796875000000000e+02 -1.952789306640619893e+00 9.999999776482580358e-03 2.857142857142859829e-02 2.128704833984380002e+03 1.979990601539610040e+00 1.000000000000000000e+00 1.626307373046880116e+02 -8.325000000000000000e+01 5.075000000000000000e+01
3.300000000000000000e+01 6.904230769230770193e+02 4.035644226074219887e+02 -1.897796630859380107e+00 9.999999776482580358e-03 8.571428571428570120e-02 2.134947021484380002e+03 1.995359778404240059e+00 3.000000000000000000e+00 1.600920257568359943e+02 -8.275000000000000000e+01 5.075000000000000000e+01
4.700000000000000000e+01 6.967846153846149946e+02 3.922189025878910229e+02 -1.889465332031250000e+00 9.999999776482580358e-03 2.857142857142859829e-02 2.121251464843750000e+03 1.990760087966920056e+00 4.000000000000000000e+00 9.315466308593750000e+01 -8.225000000000000000e+01 5.075000000000000000e+01
1.400000000000000000e+01 7.058615384615389985e+02 3.784579772949219887e+02 -1.927886962890619893e+00 9.999999776482580358e-03 8.571428571428570120e-02 2.087618652343750000e+03 1.967535734176639961e+00 1.000000000000000000e+00 6.344881820678710227e+01 -8.175000000000000000e+01 5.075000000000000000e+01
1.600000000000000000e+01 7.023615384615389985e+02 3.517676391601560226e+02 -2.004669189453120115e+00 9.999999776482580358e-03 5.882352963089940157e-02 2.020353149414059999e+03 1.926719188690189988e+00 1.000000000000000000e+00 6.465886688232420454e+01 -8.075000000000000000e+01 5.075000000000000000e+01
5.600000000000000000e+01 7.007461538461540158e+02 3.464907531738280113e+02 -1.988128662109380107e+00 9.999999776482580358e-03 8.571428571428570120e-02 2.025454711914059999e+03 1.918255090713500088e+00 4.000000000000000000e+00 1.213530960083009944e+02 -8.025000000000000000e+01 5.075000000000000000e+01
9.000000000000000000e+00 7.054846153846150401e+02 3.534559936523439774e+02 -1.953247070312500000e+00 9.999999776482580358e-03 1.428571428571429880e-01 2.043467651367190001e+03 1.915175437927250091e+00 1.000000000000000000e+00 5.528144073486330257e+01 -7.975000000000000000e+01 5.075000000000000000e+01
4.900000000000000000e+01 7.123461538461540385e+02 3.724966735839839771e+02 -1.918395996093750000e+00 9.999999776482580358e-03 2.000000000000000111e-01 2.061480712890619998e+03 1.659151673316960007e+00 4.000000000000000000e+00 7.659990692138670454e+01 -7.925000000000000000e+01 5.075000000000000000e+01
4.900000000000000000e+01 7.194923076923080316e+02 3.964537353515619884e+02 -1.883514404296880107e+00 9.999999776482580358e-03 2.857142857142859829e-02 2.079493652343750000e+03 7.818427085876460403e-01 4.000000000000000000e+00 1.512087402343750000e+02 -7.875000000000000000e+01 5.075000000000000000e+01
4.600000000000000000e+01 7.366615384615389530e+02 4.161082458496089771e+02 -2.049438476562500000e+00 9.999999776482580358e-03 2.857142857142859829e-02 2.042656982421880002e+03 7.798042297363280140e-01 4.000000000000000000e+00 2.064480590820309942e+02 -7.825000000000000000e+01 5.075000000000000000e+01
4.900000000000000000e+01 7.589846153846150401e+02 4.298748474121089771e+02 -2.215362548828120115e+00 9.999999776482580358e-03 1.428571428571429880e-01 2.005820312500000000e+03 7.725032567977909714e-01 4.000000000000000000e+00 2.432402648925780113e+02 -7.775000000000000000e+01 5.075000000000000000e+01
6.100000000000000000e+01 8.019230769230770193e+02 4.443924255371089771e+02 -2.548004150390620115e+00 9.999999776482580358e-03 1.428571428571429880e-01 1.932687255859380002e+03 1.876116156578059968e+00 4.000000000000000000e+00 2.697831726074219887e+02 -7.675000000000000000e+01 5.075000000000000000e+01
6.000000000000000000e+01 8.076076923076919911e+02 4.591826171875000000e+02 -2.717193603515620115e+00 9.999999776482580358e-03 2.571428571428570065e-01 1.898012451171880002e+03 1.696277737617490011e+00 4.000000000000000000e+00 2.782084350585939774e+02 -7.625000000000000000e+01 5.075000000000000000e+01
2.500000000000000000e+01 8.333153846153850282e+02 4.813179321289060226e+02 -2.886352539062500000e+00 9.999999776482580358e-03 6.470588445663449928e-01 1.863337646484380002e+03 7.654276490211490147e-01 3.000000000000000000e+00 3.105252075195310226e+02 -7.575000000000000000e+01 5.075000000000000000e+01
3.000000000000000000e+01 8.349846153846159496e+02 4.981842956542969887e+02 -3.055541992187500000e+00 9.999999776482580358e-03 9.411764740943909802e-01 1.828662841796880002e+03 8.167186379432680443e-01 3.000000000000000000e+00 3.307462158203119884e+02 -7.525000000000000000e+01 5.075000000000000000e+01
4.600000000000000000e+01 8.945769230769229807e+02 4.734252319335939774e+02 -3.445220947265620115e+00 1.513962000608440051e-01 2.571428571428570065e-01 1.720282714843750000e+03 1.270537257194519931e+00 4.000000000000000000e+00 4.876656494140619884e+02 -7.325000000000000000e+01 5.075000000000000000e+01
3.800000000000000000e+01 9.037307692307699654e+02 4.476931152343750000e+02 -3.437866210937500000e+00 1.554817110300059924e-01 1.714285714285710138e-01 1.704929321289059999e+03 7.915663719177250535e-01 3.000000000000000000e+00 5.281895751953120453e+02 -7.275000000000000000e+01 5.075000000000000000e+01
2.400000000000000000e+01 9.250538461538460524e+02 4.286358642578119884e+02 -3.399047851562500000e+00 1.782589107751849922e-01 2.941176593303679865e-01 1.693128906250000000e+03 7.309967875480649635e-01 3.000000000000000000e+00 5.387216186523439774e+02 -7.225000000000000000e+01 5.075000000000000000e+01
5.100000000000000000e+01 9.627307692307699654e+02 4.124972839355469887e+02 -3.360229492187500000e+00 1.814021319150919964e-01 6.470588445663449928e-01 1.681328613281250000e+03 7.218065857887270287e-01 4.000000000000000000e+00 5.363314208984379547e+02 -7.175000000000000000e+01 5.075000000000000000e+01
1.200000000000000000e+01 9.391923076923079634e+02 3.943440246582030113e+02 -3.321380615234379885e+00 1.242327764630320047e-01 5.882353186607359730e-01 1.669528198242190001e+03 1.028936386108399992e+00 1.000000000000000000e+00 4.574375305175780113e+02 -7.125000000000000000e+01 5.075000000000000000e+01
4.900000000000000000e+01 9.549769230769229580e+02 4.001877746582030113e+02 -3.257263183593750000e+00 1.329262256622310012e-01 6.470588445663449928e-01 1.668478515625000000e+03 9.205482006073000267e-01 4.000000000000000000e+00 5.048030090332030113e+02 -7.075000000000000000e+01 5.075000000000000000e+01
5.100000000000000000e+01 1.090830769230770102e+03 4.280179443359380116e+02 -3.128997802734379885e+00 2.656746506690980114e-01 2.857142857142859829e-02 1.666379028320309999e+03 1.746395945549009898e+00 4.000000000000000000e+00 7.426630249023439774e+02 -6.975000000000000000e+01 5.075000000000000000e+01
4.800000000000000000e+01 1.066784615384620110e+03 4.413555297851560226e+02 -3.058959960937500000e+00 9.999999776482580358e-03 0.000000000000000000e+00 1.667998168945309999e+03 1.783286452293399993e+00 4.000000000000000000e+00 3.935045471191410229e+02 -6.925000000000000000e+01 5.075000000000000000e+01
6.100000000000000000e+01 1.134484615384619929e+03 5.024552612304689774e+02 -2.883422851562500000e+00 2.559279799461359750e-01 0.000000000000000000e+00 1.687249145507809999e+03 1.806795001029970038e+00 4.000000000000000000e+00 6.021996459960939774e+02 -6.825000000000000000e+01 5.075000000000000000e+01
7.200000000000000000e+01 1.157392307692309942e+03 5.298809204101560226e+02 -2.795654296875000000e+00 9.999999776482580358e-03 0.000000000000000000e+00 1.696874633789059999e+03 1.783457636833190030e+00 4.000000000000000000e+00 4.108850708007810226e+02 -6.775000000000000000e+01 5.075000000000000000e+01
6.000000000000000000e+01 1.167846153846149946e+03 5.395912475585939774e+02 -2.659210205078120115e+00 1.064877659082409944e-01 0.000000000000000000e+00 1.709933715820309999e+03 7.146017551422120251e-01 4.000000000000000000e+00 4.974002685546880116e+02 -6.725000000000000000e+01 5.075000000000000000e+01
6.700000000000000000e+01 1.155615384615379980e+03 5.425155029296879547e+02 -2.474090576171879885e+00 9.999999776482580358e-03 5.882352963089940157e-02 1.726426269531250000e+03 7.055495977401730068e-01 4.000000000000000000e+00 4.692334594726560226e+02 -6.675000000000000000e+01 5.075000000000000000e+01
5.900000000000000000e+01 1.083492307692310078e+03 5.519086303710939774e+02 -2.103851318359379885e+00 2.166021019220349952e-01 8.823529481887819603e-01 1.759411621093750000e+03 1.614000916481020065e+00 4.000000000000000000e+00 6.121040039062500000e+02 -6.575000000000000000e+01 5.075000000000000000e+01
7.100000000000000000e+01 1.069492307692310078e+03 5.580230102539060226e+02 -1.895080566406250000e+00 9.999999776482580358e-03 0.000000000000000000e+00 1.772738403320309999e+03 1.174257516860959916e+00 4.000000000000000000e+00 2.961255798339839771e+02 -6.525000000000000000e+01 5.075000000000000000e+01
5.900000000000000000e+01 1.049630769230770056e+03 5.629119873046879547e+02 -1.678405761718750000e+00 9.999999776482580358e-03 0.000000000000000000e+00 1.785009887695309999e+03 1.254797458648680086e+00 4.000000000000000000e+00 5.104496459960939774e+02 -6.475000000000000000e+01 5.075000000000000000e+01
6.600000000000000000e+01 1.036515384615390076e+03 5.641030273437500000e+02 -1.461730957031250000e+00 9.999999776482580358e-03 2.352941185235979948e-01 1.797281372070309999e+03 7.183454036712649815e-01 4.000000000000000000e+00 3.090615844726560226e+02 -6.425000000000000000e+01 5.075000000000000000e+01
6.400000000000000000e+01 1.032099999999999909e+03 5.556826782226560226e+02 -1.245056152343750000e+00 9.999999776482580358e-03 0.000000000000000000e+00 1.809552978515619998e+03 1.174969792366030052e+00 4.000000000000000000e+00 3.820905151367189774e+02 -6.375000000000000000e+01 5.075000000000000000e+01
5.600000000000000000e+01 1.000153846153850054e+03 5.430169677734379547e+02 -1.042236328125000000e+00 9.999999776482580358e-03 2.941176593303679865e-01 1.815019287109380002e+03 1.626750707626340109e+00 4.000000000000000000e+00 3.131188659667969887e+02 -6.325000000000000000e+01 5.075000000000000000e+01
7.100000000000000000e+01 9.883999999999999773e+02 5.286614990234379547e+02 -6.365966796875000000e-01 9.999999776482580358e-03 2.941176593303679865e-01 1.825952148437500000e+03 1.727959990501400034e+00 4.000000000000000000e+00 2.802671203613280113e+02 -6.225000000000000000e+01 5.075000000000000000e+01
4.700000000000000000e+01 1.007969230769229966e+03 5.289846801757810226e+02 -4.030456542968750000e-01 0.000000000000000000e+00 0.000000000000000000e+00 1.819437377929690001e+03 1.733436822891240014e+00 4.000000000000000000e+00 2.058789367675780113e+02 -6.175000000000000000e+01 5.075000000000000000e+01
6.100000000000000000e+01 1.001299999999999955e+03 5.257714233398439774e+02 -7.727050781250000000e-02 0.000000000000000000e+00 1.176470592617989974e-01 1.776979248046880002e+03 1.731526017189030098e+00 4.000000000000000000e+00 2.019813385009769888e+02 -6.125000000000000000e+01 5.075000000000000000e+01
6.300000000000000000e+01 1.067753846153849963e+03 4.696515197753910229e+02 5.742797851562500000e-01 0.000000000000000000e+00 0.000000000000000000e+00 1.692062866210940001e+03 1.080564618110660069e+00 4.000000000000000000e+00 1.912445068359380116e+02 -6.025000000000000000e+01 5.075000000000000000e+01
1.200000000000000000e+01 1.154015384615380071e+03 5.485334472656250000e+02 1.072296142578119893e+00 0.000000000000000000e+00 0.000000000000000000e+00 1.536772705078119998e+03 8.030360937118530273e-01 1.000000000000000000e+00 4.502707824707030113e+02 -5.675000000000000000e+01 5.075000000000000000e+01
1.800000000000000000e+01 1.086192307692309896e+03 5.643272094726560226e+02 1.139495849609380107e+00 0.000000000000000000e+00 0.000000000000000000e+00 1.517276489257809999e+03 1.605527758598330079e+00 1.000000000000000000e+00 2.522004699707030113e+02 -5.625000000000000000e+01 5.075000000000000000e+01
2.800000000000000000e+01 5.294615384615390212e+02 1.882116088867190058e+02 1.886901855468750000e-01 0.000000000000000000e+00 6.470588445663449928e-01 2.598793945312500000e+03 3.415014266967769885e+00 3.000000000000000000e+00 2.606536865234380116e+02 -9.925000000000000000e+01 5.125000000000000000e+01
1.600000000000000000e+01 5.726692307692310351e+02 2.162970275878909945e+02 8.972167968750000000e-03 0.000000000000000000e+00 2.571428571428570065e-01 2.586052001953119998e+03 3.348744392395019975e+00 1.000000000000000000e+00 2.502437438964840055e+02 -9.775000000000000000e+01 5.125000000000000000e+01
2.800000000000000000e+01 6.260076923076919684e+02 2.184717712402340055e+02 -1.170043945312500000e-01 0.000000000000000000e+00 6.470588445663449928e-01 2.565697021484380002e+03 3.336313962936400035e+00 3.000000000000000000e+00 2.389074859619140057e+02 -9.725000000000000000e+01 5.125000000000000000e+01
4.300000000000000000e+01 6.351461538461539931e+02 2.475987091064449999e+02 -6.930847167968750000e-01 0.000000000000000000e+00 1.428571428571429880e-01 2.456310302734380002e+03 8.714583516120909534e-01 3.000000000000000000e+00 2.854094543457030113e+02 -9.575000000000000000e+01 5.125000000000000000e+01
5.600000000000000000e+01 6.547769230769230262e+02 2.539201507568359943e+02 -8.757019042968750000e-01 0.000000000000000000e+00 4.285714285714289917e-01 2.420117919921880002e+03 8.696691989898680530e-01 4.000000000000000000e+00 3.276743774414060226e+02 -9.525000000000000000e+01 5.125000000000000000e+01
4.900000000000000000e+01 6.706076923076919911e+02 2.477467651367190058e+02 -1.055206298828119893e+00 0.000000000000000000e+00 2.571428571428570065e-01 2.384015869140619998e+03 8.737932443618769973e-01 4.000000000000000000e+00 3.514350891113280113e+02 -9.475000000000000000e+01 5.125000000000000000e+01
6.700000000000000000e+01 6.913384615384619565e+02 2.408292083740230112e+02 -1.234680175781250000e+00 0.000000000000000000e+00 5.882352963089940157e-02 2.347913574218750000e+03 1.091278314590450105e+00 4.000000000000000000e+00 3.856307373046880116e+02 -9.425000000000000000e+01 5.125000000000000000e+01
4.600000000000000000e+01 7.152692307692309441e+02 2.355410461425780113e+02 -1.414184570312500000e+00 0.000000000000000000e+00 5.294117927551269531e-01 2.311811279296880002e+03 8.820083737373349830e-01 4.000000000000000000e+00 3.799738159179689774e+02 -9.375000000000000000e+01 5.125000000000000000e+01
7.000000000000000000e+01 7.790769230769229807e+02 2.651664123535160229e+02 -1.584594726562500000e+00 9.999999776482580358e-03 1.428571428571429880e-01 2.257689941406250000e+03 2.022817611694339934e+00 4.000000000000000000e+00 4.094635009765619884e+02 -9.275000000000000000e+01 5.125000000000000000e+01
5.200000000000000000e+01 8.228153846153850282e+02 3.139393615722660229e+02 -1.777130126953119893e+00 9.999999776482580358e-03 5.882353186607359730e-01 2.188763671875000000e+03 2.082397222518920010e+00 4.000000000000000000e+00 3.911296081542969887e+02 -9.125000000000000000e+01 5.125000000000000000e+01
6.500000000000000000e+01 8.333307692307689649e+02 2.849378967285160229e+02 -1.846557617187500000e+00 9.999999776482580358e-03 1.428571428571429880e-01 2.154251953125000000e+03 2.027669191360470080e+00 4.000000000000000000e+00 3.896529235839839771e+02 -9.025000000000000000e+01 5.125000000000000000e+01
3.900000000000000000e+01 8.316461538461539931e+02 2.800770874023439774e+02 -1.894348144531250000e+00 9.999999776482580358e-03 5.882353186607359730e-01 2.138008056640619998e+03 1.964935302734380107e+00 3.000000000000000000e+00 3.691405029296880116e+02 -8.975000000000000000e+01 5.125000000000000000e+01
6.100000000000000000e+01 8.017846153846149946e+02 2.814400329589839771e+02 -1.955261230468750000e+00 9.999999776482580358e-03 2.941176593303679865e-01 2.122776123046880002e+03 1.281076788902280050e+00 4.000000000000000000e+00 3.497615051269530113e+02 -8.925000000000000000e+01 5.125000000000000000e+01
5.700000000000000000e+01 7.713538461538460069e+02 2.853889465332030113e+02 -2.016143798828120115e+00 9.999999776482580358e-03 2.941176593303679865e-01 2.107544189453119998e+03 1.006112575531010078e+00 4.000000000000000000e+00 3.575291137695310226e+02 -8.875000000000000000e+01 5.125000000000000000e+01
5.800000000000000000e+01 7.245692307692310123e+02 3.036461791992189774e+02 -2.155578613281250000e+00 9.999999776482580358e-03 1.142857142857140046e-01 2.080400390625000000e+03 7.923359870910640090e-01 4.000000000000000000e+00 2.777590332031250000e+02 -8.775000000000000000e+01 5.125000000000000000e+01
5.600000000000000000e+01 7.072999999999999545e+02 3.295965576171880116e+02 -2.324523925781250000e+00 9.999999776482580358e-03 2.857142857142859829e-02 2.058789550781250000e+03 7.980268001556399815e-01 4.000000000000000000e+00 2.375170288085940058e+02 -8.675000000000000000e+01 5.125000000000000000e+01
6.100000000000000000e+01 6.884923076923080316e+02 3.407269287109380116e+02 -2.408996582031250000e+00 9.999999776482580358e-03 2.941176593303679865e-01 2.047984252929690001e+03 1.659580230712889959e+00 4.000000000000000000e+00 1.941662139892580115e+02 -8.625000000000000000e+01 5.125000000000000000e+01
3.600000000000000000e+01 6.763076923076920366e+02 3.523936767578119884e+02 -2.430664062500000000e+00 9.999999776482580358e-03 5.714285714285709944e-02 2.048576416015619998e+03 1.977526903152470039e+00 3.000000000000000000e+00 1.719999694824219887e+02 -8.575000000000000000e+01 5.125000000000000000e+01
5.900000000000000000e+01 6.729384615384619792e+02 3.698158569335939774e+02 -2.452301025390620115e+00 9.999999776482580358e-03 5.714285714285709944e-02 2.049168701171880002e+03 1.971969723701479937e+00 4.000000000000000000e+00 1.679907226562500000e+02 -8.525000000000000000e+01 5.125000000000000000e+01
6.000000000000000000e+00 6.695923076923070312e+02 3.849426269531250000e+02 -2.473968505859379885e+00 9.999999776482580358e-03 5.714285714285709944e-02 2.049760742187500000e+03 1.960880637168880058e+00 1.000000000000000000e+00 1.385775451660159945e+02 -8.475000000000000000e+01 5.125000000000000000e+01
7.000000000000000000e+00 6.581692307692310351e+02 3.965635375976560226e+02 -2.464294433593750000e+00 9.999999776482580358e-03 2.857142857142859829e-02 2.052369628906250000e+03 1.953123450279240059e+00 1.000000000000000000e+00 9.158667755126950283e+01 -8.425000000000000000e+01 5.125000000000000000e+01
2.000000000000000000e+01 6.539923076923080316e+02 3.975270690917969887e+02 -2.360717773437500000e+00 9.999999776482580358e-03 5.882353186607359730e-01 2.061028076171880002e+03 1.943559527397159981e+00 3.000000000000000000e+00 9.502926635742190342e+01 -8.375000000000000000e+01 5.125000000000000000e+01
5.200000000000000000e+01 6.581769230769230035e+02 3.894067382812500000e+02 -2.257110595703120115e+00 9.999999776482580358e-03 2.941176593303679865e-01 2.069686767578119998e+03 1.939094662666319913e+00 4.000000000000000000e+00 8.865423583984380684e+01 -8.325000000000000000e+01 5.125000000000000000e+01
1.900000000000000000e+01 6.566846153846149718e+02 3.758872375488280113e+02 -2.153503417968750000e+00 9.999999776482580358e-03 2.857142857142859829e-02 2.078345214843750000e+03 1.941144108772280052e+00 1.000000000000000000e+00 1.016746139526370030e+02 -8.275000000000000000e+01 5.125000000000000000e+01
1.500000000000000000e+01 6.533692307692309669e+02 3.626157836914060226e+02 -2.184265136718750000e+00 9.999999776482580358e-03 0.000000000000000000e+00 2.035725097656250000e+03 1.936546683311459960e+00 1.000000000000000000e+00 1.131838378906250000e+02 -8.225000000000000000e+01 5.125000000000000000e+01
3.200000000000000000e+01 6.584615384615379980e+02 3.438571472167969887e+02 -2.514556884765620115e+00 9.999999776482580358e-03 1.142857142857140046e-01 1.847926757812500000e+03 1.900652170181269973e+00 3.000000000000000000e+00 4.066680526733399859e+01 -8.125000000000000000e+01 5.125000000000000000e+01
6.200000000000000000e+01 6.566307692307690331e+02 3.388959045410160229e+02 -2.679718017578120115e+00 9.999999776482580358e-03 5.882352963089940157e-02 1.754027587890619998e+03 1.888148903846740057e+00 4.000000000000000000e+00 1.516192245483400036e+01 -8.075000000000000000e+01 5.125000000000000000e+01
1.200000000000000000e+01 6.830000000000000000e+02 3.519011535644530113e+02 -2.214935302734379885e+00 9.999999776482580358e-03 8.571428571428570120e-02 1.955298706054690001e+03 1.185332059860229936e+00 1.000000000000000000e+00 1.731661796569819955e+01 -7.925000000000000000e+01 5.125000000000000000e+01
3.500000000000000000e+01 6.931076923076919911e+02 3.683640747070310226e+02 -2.030914306640620115e+00 9.999999776482580358e-03 2.000000000000000111e-01 2.037024536132809999e+03 7.705648541450500488e-01 3.000000000000000000e+00 3.332099914550779829e+01 -7.875000000000000000e+01 5.125000000000000000e+01
4.900000000000000000e+01 7.248769230769230489e+02 3.877942199707030113e+02 -2.232513427734379885e+00 9.999999776482580358e-03 5.294117927551269531e-01 1.997180664062500000e+03 7.643096446990970128e-01 4.000000000000000000e+00 1.004303207397459943e+02 -7.825000000000000000e+01 5.125000000000000000e+01
2.000000000000000000e+01 7.512999999999999545e+02 4.091109313964839771e+02 -2.434112548828120115e+00 1.099888533353809983e-01 6.470588445663449928e-01 1.957336914062500000e+03 7.577934861183169835e-01 3.000000000000000000e+00 2.157283630371090055e+02 -7.775000000000000000e+01 5.125000000000000000e+01
2.100000000000000000e+01 7.662692307692309441e+02 4.265771484375000000e+02 -2.635711669921879885e+00 1.039507314562800044e-01 2.941176593303679865e-01 1.917493041992190001e+03 7.547930479049680397e-01 3.000000000000000000e+00 2.370303497314449999e+02 -7.725000000000000000e+01 5.125000000000000000e+01
4.100000000000000000e+01 7.816538461538459615e+02 4.406922912597660229e+02 -2.837158203125000000e+00 1.126414835453029978e-01 2.941176593303679865e-01 1.878429077148440001e+03 7.536458969116209827e-01 3.000000000000000000e+00 2.621594238281250000e+02 -7.675000000000000000e+01 5.125000000000000000e+01
5.500000000000000000e+01 8.121615384615380435e+02 4.785391845703119884e+02 -3.239166259765620115e+00 1.358046531677249980e-01 4.000000000000000222e-01 1.804980102539059999e+03 1.057611823081969993e+00 4.000000000000000000e+00 3.696444091796880116e+02 -7.575000000000000000e+01 5.125000000000000000e+01
5.500000000000000000e+01 8.265538461538460524e+02 4.966147766113280113e+02 -3.440185546875000000e+00 1.238401085138319951e-01 7.058823704719540126e-01 1.768255493164059999e+03 1.747719883918759987e+00 4.000000000000000000e+00 3.234350585937500000e+02 -7.525000000000000000e+01 5.125000000000000000e+01
3.900000000000000000e+01 8.395153846153840504e+02 5.024342041015619884e+02 -3.587951660156250000e+00 1.307751834392550105e-01 8.235294222831730515e-01 1.736733642578119998e+03 1.065185189247130015e+00 3.000000000000000000e+00 3.379307861328119884e+02 -7.475000000000000000e+01 5.125000000000000000e+01
3.200000000000000000e+01 8.503153846153850282e+02 4.990506286621089771e+02 -3.682495117187500000e+00 1.279345005750660014e-01 8.235294222831730515e-01 1.710414306640619998e+03 1.305231928825379972e+00 3.000000000000000000e+00 3.731191711425780113e+02 -7.425000000000000000e+01 5.125000000000000000e+01
6.300000000000000000e+01 9.345769230769229807e+02 4.033052673339839771e+02 -3.780456542968750000e+00 2.423627823591230079e-01 2.941176593303679865e-01 1.614542480468750000e+03 7.064871191978450149e-01 4.000000000000000000e+00 5.905162353515620453e+02 -7.175000000000000000e+01 5.125000000000000000e+01
5.600000000000000000e+01 9.701846153846149718e+02 3.995542297363280113e+02 -3.683776855468750000e+00 1.903680115938189976e-01 6.470588445663449928e-01 1.597634033203119998e+03 1.579280257225039952e+00 4.000000000000000000e+00 5.521074218750000000e+02 -7.075000000000000000e+01 5.125000000000000000e+01
2.600000000000000000e+01 1.021161538461539976e+03 4.249665832519530113e+02 -3.573852539062500000e+00 1.572481244802469980e-01 5.714285714285709944e-02 1.590474365234380002e+03 1.494502544403079947e+00 3.000000000000000000e+00 4.880938720703119884e+02 -6.975000000000000000e+01 5.125000000000000000e+01
5.700000000000000000e+01 1.027653846153850054e+03 4.287598571777339771e+02 -3.522369384765620115e+00 1.480740904808039993e-01 0.000000000000000000e+00 1.588810791015619998e+03 1.762648105621339889e+00 4.000000000000000000e+00 4.583989257812500000e+02 -6.925000000000000000e+01 5.125000000000000000e+01
5.700000000000000000e+01 1.049523076923079998e+03 4.426482849121089771e+02 -3.481414794921879885e+00 1.789456605911249887e-01 5.882353186607359730e-01 1.592896240234380002e+03 1.778933286666869895e+00 4.000000000000000000e+00 5.382864990234379547e+02 -6.875000000000000000e+01 5.125000000000000000e+01
5.100000000000000000e+01 1.156546153846149991e+03 5.275209350585939774e+02 -3.325408935546879885e+00 2.735347449779509943e-01 0.000000000000000000e+00 1.608587646484380002e+03 1.668396115303039995e+00 4.000000000000000000e+00 6.462064819335939774e+02 -6.725000000000000000e+01 5.125000000000000000e+01
5.700000000000000000e+01 1.067200000000000045e+03 5.321795043945310226e+02 -3.218261718750000000e+00 2.507760226726529762e-01 2.352941185235979948e-01 1.619543090820309999e+03 1.667085170745850053e+00 4.000000000000000000e+00 6.833673095703120453e+02 -6.675000000000000000e+01 5.125000000000000000e+01
4.200000000000000000e+01 1.006192307692310010e+03 5.411159667968750000e+02 -3.111114501953120115e+00 1.699143052101139972e-01 0.000000000000000000e+00 1.630498657226559999e+03 1.664456129074100010e+00 3.000000000000000000e+00 4.299242553710939774e+02 -6.625000000000000000e+01 5.125000000000000000e+01
4.300000000000000000e+01 9.528076923076920366e+02 5.455806274414060226e+02 -3.003967285156250000e+00 2.621402144432070092e-01 0.000000000000000000e+00 1.641454101562500000e+03 1.655626177787780096e+00 3.000000000000000000e+00 6.357659912109379547e+02 -6.575000000000000000e+01 5.125000000000000000e+01
5.200000000000000000e+01 9.399461538461539476e+02 5.468282470703120453e+02 -2.852661132812500000e+00 1.599492281675340133e-01 3.529411852359770063e-01 1.652648681640619998e+03 1.636385321617130018e+00 4.000000000000000000e+00 5.574034423828120453e+02 -6.525000000000000000e+01 5.125000000000000000e+01
7.100000000000000000e+01 1.017807692307689990e+03 5.421979370117189774e+02 -2.686614990234379885e+00 2.224744558334350031e-01 0.000000000000000000e+00 1.663922973632809999e+03 1.582230806350710006e+00 4.000000000000000000e+00 4.386161193847660229e+02 -6.475000000000000000e+01 5.125000000000000000e+01
1.600000000000000000e+01 1.057361538461540022e+03 5.327091064453120453e+02 -2.520599365234379885e+00 4.069528579711910177e-01 0.000000000000000000e+00 1.675197143554690001e+03 1.554437756538390003e+00 1.000000000000000000e+00 8.348688354492189774e+02 -6.425000000000000000e+01 5.125000000000000000e+01
4.600000000000000000e+01 1.035476923076920002e+03 5.199673461914060226e+02 -2.354583740234379885e+00 2.093195617198939928e-01 2.941176593303679865e-01 1.686471435546880002e+03 1.570714235305789908e+00 4.000000000000000000e+00 5.651628417968750000e+02 -6.375000000000000000e+01 5.125000000000000000e+01
7.400000000000000000e+01 1.066176923076920048e+03 4.996466064453119884e+02 -1.725036621093750000e+00 1.824311912059780050e-01 0.000000000000000000e+00 1.712161499023440001e+03 1.236149430274960048e+00 4.000000000000000000e+00 4.649745178222660229e+02 -6.225000000000000000e+01 5.125000000000000000e+01
7.200000000000000000e+01 1.022392307692310055e+03 5.061279907226560226e+02 -1.482330322265619893e+00 9.999999776482580358e-03 0.000000000000000000e+00 1.712529174804690001e+03 1.119848489761350097e+00 4.000000000000000000e+00 2.762698364257810226e+02 -6.175000000000000000e+01 5.125000000000000000e+01
6.300000000000000000e+01 1.087761538461540113e+03 4.929193725585939774e+02 -7.998352050781250000e-01 9.999999776482580358e-03 0.000000000000000000e+00 1.664089721679690001e+03 1.581003665924070045e+00 4.000000000000000000e+00 3.548988647460939774e+02 -6.075000000000000000e+01 5.125000000000000000e+01
4.200000000000000000e+01 1.104107692307690058e+03 4.672578125000000000e+02 -4.586181640625000000e-01 9.999999776482580358e-03 2.941176593303679865e-01 1.639869995117190001e+03 1.650993704795840067e+00 3.000000000000000000e+00 3.716044311523439774e+02 -6.025000000000000000e+01 5.125000000000000000e+01
5.000000000000000000e+01 1.078446153846150082e+03 4.545556335449219887e+02 -2.210388183593750000e-01 9.999999776482580358e-03 0.000000000000000000e+00 1.621588012695309999e+03 1.705383539199829990e+00 4.000000000000000000e+00 2.605172424316410229e+02 -5.975000000000000000e+01 5.125000000000000000e+01
5.400000000000000000e+01 1.082446153846150082e+03 4.700615844726560226e+02 -8.712768554687500000e-02 0.000000000000000000e+00 0.000000000000000000e+00 1.609243774414059999e+03 1.738311767578119893e+00 4.000000000000000000e+00 2.227319488525390057e+02 -5.925000000000000000e+01 5.125000000000000000e+01
5.100000000000000000e+01 1.110053846153849918e+03 5.357701416015620453e+02 7.412414550781250000e-01 0.000000000000000000e+00 0.000000000000000000e+00 1.528207275390619998e+03 1.485018134117130018e+00 4.000000000000000000e+00 4.306690979003909803e+01 -5.625000000000000000e+01 5.125000000000000000e+01
3.300000000000000000e+01 5.681461538461539931e+02 1.583875274658199999e+02 -2.365417480468750000e-01 0.000000000000000000e+00 7.142857142857139685e-01 2.542077880859380002e+03 2.142712116241459963e+00 3.000000000000000000e+00 2.267123107910159945e+02 -9.775000000000000000e+01 5.175000000000000000e+01
5.700000000000000000e+01 6.481076923076919911e+02 1.584712524414059942e+02 -8.197937011718750000e-01 0.000000000000000000e+00 2.857142857142859829e-02 2.439498535156250000e+03 1.348933815956119942e+00 4.000000000000000000e+00 2.523748016357419885e+02 -9.625000000000000000e+01 5.175000000000000000e+01
3.700000000000000000e+01 6.571692307692310351e+02 1.724028930664059942e+02 -1.040832519531250000e+00 0.000000000000000000e+00 4.285714285714289917e-01 2.398835937500000000e+03 8.566977977752689988e-01 3.000000000000000000e+00 2.947053222656250000e+02 -9.575000000000000000e+01 5.175000000000000000e+01
4.400000000000000000e+01 6.640538461538460524e+02 1.981836242675780113e+02 -1.226226806640619893e+00 0.000000000000000000e+00 1.142857142857140046e-01 2.362881347656250000e+03 8.548655509948730469e-01 3.000000000000000000e+00 3.178142395019530113e+02 -9.525000000000000000e+01 5.175000000000000000e+01
4.600000000000000000e+01 6.754692307692309896e+02 2.217744140625000000e+02 -1.399688720703119893e+00 0.000000000000000000e+00 5.294117927551269531e-01 2.328496337890619998e+03 8.926151990890499599e-01 4.000000000000000000e+00 3.568327331542969887e+02 -9.475000000000000000e+01 5.175000000000000000e+01
6.700000000000000000e+01 6.883846153846150173e+02 2.307762451171880116e+02 -1.573150634765619893e+00 0.000000000000000000e+00 8.571428571428570120e-02 2.294111083984380002e+03 8.563698530197140224e-01 4.000000000000000000e+00 3.766885681152339771e+02 -9.425000000000000000e+01 5.175000000000000000e+01
7.000000000000000000e+01 7.268230769230769965e+02 2.359168243408199999e+02 -1.844024658203119893e+00 9.999999776482580358e-03 2.352941185235979948e-01 2.231861816406250000e+03 8.540167808532710403e-01 4.000000000000000000e+00 3.710452270507810226e+02 -9.325000000000000000e+01 5.175000000000000000e+01
6.500000000000000000e+01 7.652461538461540158e+02 2.430503540039059942e+02 -1.941467285156250000e+00 9.999999776482580358e-03 1.142857142857140046e-01 2.203997802734380002e+03 1.270099163055419922e+00 4.000000000000000000e+00 3.767803039550780113e+02 -9.275000000000000000e+01 5.175000000000000000e+01
6.000000000000000000e+01 7.849615384615379980e+02 2.593625793457030113e+02 -2.038879394531250000e+00 9.999999776482580358e-03 5.714285714285709944e-02 2.176133789062500000e+03 2.036841869354249823e+00 4.000000000000000000e+00 4.260244445800780113e+02 -9.225000000000000000e+01 5.175000000000000000e+01
3.800000000000000000e+01 7.865230769230770420e+02 2.736322021484380116e+02 -2.129058837890620115e+00 9.999999776482580358e-03 2.857142857142859829e-02 2.150371093750000000e+03 2.054738521575929955e+00 3.000000000000000000e+00 4.024723510742189774e+02 -9.175000000000000000e+01 5.175000000000000000e+01
4.700000000000000000e+01 7.997923076923079861e+02 2.794877014160160229e+02 -2.197540283203120115e+00 9.999999776482580358e-03 1.176470592617989974e-01 2.130913085937500000e+03 2.050609588623049984e+00 4.000000000000000000e+00 4.109045410156250000e+02 -9.125000000000000000e+01 5.175000000000000000e+01
5.300000000000000000e+01 8.263153846153840050e+02 2.775797119140619884e+02 -2.414367675781250000e+00 9.999999776482580358e-03 5.714285714285709944e-02 2.073620361328119998e+03 1.951764822006230027e+00 4.000000000000000000e+00 3.343794555664060226e+02 -8.975000000000000000e+01 5.175000000000000000e+01
6.300000000000000000e+01 7.947000000000000455e+02 2.799619750976560226e+02 -2.505615234375000000e+00 9.999999776482580358e-03 2.941176593303679865e-01 2.056325195312500000e+03 1.930334210395810102e+00 4.000000000000000000e+00 3.554184265136719887e+02 -8.925000000000000000e+01 5.175000000000000000e+01
6.100000000000000000e+01 7.654230769230770193e+02 2.804002685546880116e+02 -2.596862792968750000e+00 1.122075244784360021e-01 1.764705926179890028e-01 2.039029785156250000e+03 1.929625868797300026e+00 4.000000000000000000e+00 3.413318786621089771e+02 -8.875000000000000000e+01 5.175000000000000000e+01
5.300000000000000000e+01 7.394615384615390212e+02 2.807745361328119884e+02 -2.688140869140620115e+00 9.999999776482580358e-03 2.285714285714290084e-01 2.021734497070309999e+03 1.403125286102290037e+00 4.000000000000000000e+00 3.175368957519530113e+02 -8.825000000000000000e+01 5.175000000000000000e+01
5.200000000000000000e+01 7.088999999999999773e+02 2.846239318847660229e+02 -2.842315673828120115e+00 1.030334755778310046e-01 2.285714285714290084e-01 1.998558105468750000e+03 1.936451792716979980e+00 4.000000000000000000e+00 2.684226989746089771e+02 -8.725000000000000000e+01 5.175000000000000000e+01
3.000000000000000000e+01 6.987461538461540158e+02 2.905015563964839771e+02 -2.917419433593750000e+00 9.999999776482580358e-03 1.142857142857140046e-01 1.987785278320309999e+03 1.769243359565729978e+00 3.000000000000000000e+00 2.208514251708980112e+02 -8.675000000000000000e+01 5.175000000000000000e+01
4.500000000000000000e+01 6.779153846153850509e+02 2.941304626464839771e+02 -2.992492675781250000e+00 9.999999776482580358e-03 2.352941185235979948e-01 1.977012329101559999e+03 1.949947953224179908e+00 4.000000000000000000e+00 1.739680328369140057e+02 -8.625000000000000000e+01 5.175000000000000000e+01
2.300000000000000000e+01 6.680461538461539703e+02 3.013848876953119884e+02 -2.968841552734379885e+00 9.999999776482580358e-03 2.857142857142859829e-02 1.979342163085940001e+03 1.948522806167600097e+00 3.000000000000000000e+00 1.646343383789059942e+02 -8.575000000000000000e+01 5.175000000000000000e+01
4.500000000000000000e+01 6.548846153846150173e+02 3.160783691406250000e+02 -2.945190429687500000e+00 9.999999776482580358e-03 0.000000000000000000e+00 1.981672119140619998e+03 1.937449336051940030e+00 4.000000000000000000e+00 1.575185241699219887e+02 -8.525000000000000000e+01 5.175000000000000000e+01
2.600000000000000000e+01 6.481538461538459615e+02 3.396916198730469887e+02 -2.921569824218750000e+00 9.999999776482580358e-03 2.857142857142859829e-02 1.984001953125000000e+03 1.927267909049990013e+00 3.000000000000000000e+00 1.638378295898440058e+02 -8.475000000000000000e+01 5.175000000000000000e+01
3.700000000000000000e+01 6.403692307692309669e+02 3.623471984863280113e+02 -2.865783691406250000e+00 9.999999776482580358e-03 5.714285714285709944e-02 1.988518188476559999e+03 1.917324662208560015e+00 3.000000000000000000e+00 1.069773864746090055e+02 -8.425000000000000000e+01 5.175000000000000000e+01
3.600000000000000000e+01 6.279461538461539476e+02 3.626140747070310226e+02 -2.561401367187500000e+00 9.999999776482580358e-03 2.857142857142859829e-02 2.010668579101559999e+03 1.906418800353999909e+00 3.000000000000000000e+00 6.965806579589839487e+01 -8.325000000000000000e+01 5.175000000000000000e+01
1.200000000000000000e+01 6.275076923076919684e+02 3.544058532714839771e+02 -2.409210205078120115e+00 9.999999776482580358e-03 5.714285714285709944e-02 2.021743774414059999e+03 1.897459149360660069e+00 1.000000000000000000e+00 6.332442474365230112e+01 -8.275000000000000000e+01 5.175000000000000000e+01
1.600000000000000000e+01 6.176692307692310351e+02 3.480152893066410229e+02 -2.479064941406250000e+00 9.999999776482580358e-03 2.857142857142859829e-02 1.950198608398440001e+03 1.888184905052189944e+00 1.000000000000000000e+00 5.769877624511720171e+01 -8.225000000000000000e+01 5.175000000000000000e+01
1.700000000000000000e+01 6.162923076923079861e+02 3.397947082519530113e+02 -3.062866210937500000e+00 9.999999776482580358e-03 0.000000000000000000e+00 1.641867675781250000e+03 1.866352319717409891e+00 1.000000000000000000e+00 3.465790557861330257e+01 -8.125000000000000000e+01 5.175000000000000000e+01
1.600000000000000000e+01 7.184692307692309896e+02 3.671546630859380116e+02 -2.415588378906250000e+00 1.012064889073369944e-01 2.571428571428570065e-01 1.951704345703119998e+03 7.488520145416259766e-01 1.000000000000000000e+00 6.597674560546880684e+01 -7.825000000000000000e+01 5.175000000000000000e+01
2.700000000000000000e+01 7.294153846153840277e+02 3.825723876953119884e+02 -2.652862548828120115e+00 1.190177798271180032e-01 5.882353186607359730e-01 1.908853515625000000e+03 7.451215982437130458e-01 3.000000000000000000e+00 1.578467102050780113e+02 -7.775000000000000000e+01 5.175000000000000000e+01
1.300000000000000000e+01 7.470538461538460524e+02 3.991633911132810226e+02 -2.890136718750000000e+00 1.287701874971390048e-01 1.117647051811220038e+00 1.866002563476559999e+03 7.388435602188110352e-01 1.000000000000000000e+00 1.890024108886719887e+02 -7.725000000000000000e+01 5.175000000000000000e+01
3.900000000000000000e+01 7.868153846153850282e+02 4.101763610839839771e+02 -3.126312255859379885e+00 1.496048718690869972e-01 1.117647051811220038e+00 1.824170776367190001e+03 7.282211780548100144e-01 3.000000000000000000e+00 2.167120971679690058e+02 -7.675000000000000000e+01 5.175000000000000000e+01
2.100000000000000000e+01 8.018153846153840050e+02 4.264878845214839771e+02 -3.359161376953120115e+00 1.494865864515300125e-01 8.823529481887819603e-01 1.785396606445309999e+03 7.249160408973690517e-01 3.000000000000000000e+00 2.480408325195309942e+02 -7.625000000000000000e+01 5.175000000000000000e+01
2.500000000000000000e+01 7.938923076923080089e+02 4.564768676757810226e+02 -3.591979980468750000e+00 1.600692570209500121e-01 5.882353186607359730e-01 1.746622436523440001e+03 1.172315955162049894e+00 3.000000000000000000e+00 2.887433471679689774e+02 -7.575000000000000000e+01 5.175000000000000000e+01
1.700000000000000000e+01 8.116153846153849827e+02 4.760712585449219887e+02 -3.824829101562500000e+00 1.709001511335369872e-01 6.470588445663449928e-01 1.707848266601559999e+03 1.785909652709960049e+00 1.000000000000000000e+00 3.040672302246089771e+02 -7.525000000000000000e+01 5.175000000000000000e+01
3.300000000000000000e+01 8.319076923076919456e+02 4.792500000000000000e+02 -3.992218017578120115e+00 1.741609722375870029e-01 6.470588445663449928e-01 1.675147949218750000e+03 1.766375422477719948e+00 3.000000000000000000e+00 3.550698852539060226e+02 -7.475000000000000000e+01 5.175000000000000000e+01
2.000000000000000000e+01 8.778846153846150173e+02 4.544583740234380116e+02 -4.196044921875000000e+00 2.027455866336820012e-01 7.058823704719540126e-01 1.621895019531250000e+03 1.108539104461669922e+00 3.000000000000000000e+00 3.644943847656250000e+02 -7.375000000000000000e+01 5.175000000000000000e+01
2.800000000000000000e+01 8.781384615384620247e+02 4.276207885742189774e+02 -4.297973632812500000e+00 2.097456902265550094e-01 2.941176593303679865e-01 1.595268432617190001e+03 7.013915777206419788e-01 3.000000000000000000e+00 4.004848937988280113e+02 -7.325000000000000000e+01 5.175000000000000000e+01
4.200000000000000000e+01 8.718461538461540385e+02 4.129934082031250000e+02 -4.289978027343750000e+00 4.246814250946039926e-01 9.411764740943909802e-01 1.577469482421880002e+03 7.028717994689940296e-01 3.000000000000000000e+00 7.321055908203120453e+02 -7.275000000000000000e+01 5.175000000000000000e+01
3.700000000000000000e+01 8.955692307692310123e+02 4.098009643554689774e+02 -4.245330810546880329e+00 3.465285897254939962e-01 7.058823704719540126e-01 1.562612792968750000e+03 6.927921175956730515e-01 3.000000000000000000e+00 6.887566528320310226e+02 -7.225000000000000000e+01 5.175000000000000000e+01
2.300000000000000000e+01 9.206846153846149718e+02 4.029869689941410229e+02 -4.156066894531250000e+00 2.767788171768190142e-01 5.882353186607359730e-01 1.532899658203119998e+03 1.176972508430480069e+00 3.000000000000000000e+00 5.872561645507810226e+02 -7.125000000000000000e+01 5.175000000000000000e+01
2.300000000000000000e+01 9.583230769230769965e+02 4.095215148925780113e+02 -4.110290527343750000e+00 3.187821209430690139e-01 6.470588445663449928e-01 1.526789672851559999e+03 1.397296190261839932e+00 3.000000000000000000e+00 6.657482299804689774e+02 -7.075000000000000000e+01 5.175000000000000000e+01
3.800000000000000000e+01 9.647769230769230262e+02 4.187834777832030113e+02 -4.064483642578119671e+00 2.708097100257870204e-01 2.941176593303679865e-01 1.520679687500000000e+03 1.472786426544189897e+00 3.000000000000000000e+00 5.459584960937500000e+02 -7.025000000000000000e+01 5.175000000000000000e+01
4.000000000000000000e+01 9.901615384615389530e+02 4.235581665039060226e+02 -4.018676757812500000e+00 2.183318585157389968e-01 2.941176593303679865e-01 1.514569702148440001e+03 1.146573781967159977e+00 3.000000000000000000e+00 5.573703613281250000e+02 -6.975000000000000000e+01 5.175000000000000000e+01
6.600000000000000000e+01 1.090684615384619974e+03 4.618108520507810226e+02 -3.997467041015620115e+00 2.732339799404139846e-01 5.882353186607359730e-01 1.506714355468750000e+03 1.480509877204899905e+00 4.000000000000000000e+00 5.400775756835939774e+02 -6.825000000000000000e+01 5.175000000000000000e+01
5.500000000000000000e+01 1.112500000000000000e+03 4.859584655761719887e+02 -4.003295898437500000e+00 3.411627113819120094e-01 0.000000000000000000e+00 1.505259765625000000e+03 8.133096694946290173e-01 4.000000000000000000e+00 8.259348754882810226e+02 -6.775000000000000000e+01 5.175000000000000000e+01
6.400000000000000000e+01 1.074738461538459887e+03 4.961128845214839771e+02 -3.991607666015620115e+00 5.152075886726380505e-01 0.000000000000000000e+00 1.507241577148440001e+03 1.133127808570860040e+00 4.000000000000000000e+00 8.089524536132810226e+02 -6.725000000000000000e+01 5.175000000000000000e+01
5.000000000000000000e+01 9.602153846153850054e+02 4.992331542968750000e+02 -3.962432861328120115e+00 2.340245246887210084e-01 0.000000000000000000e+00 1.512660034179690001e+03 1.414535045623779963e+00 4.000000000000000000e+00 6.348272094726560226e+02 -6.675000000000000000e+01 5.175000000000000000e+01
4.600000000000000000e+01 8.733461538461540385e+02 5.062237548828119884e+02 -3.933258056640620115e+00 2.454797327518460082e-01 0.000000000000000000e+00 1.518078369140619998e+03 1.151910781860350008e+00 4.000000000000000000e+00 6.174445800781250000e+02 -6.625000000000000000e+01 5.175000000000000000e+01
5.000000000000000000e+01 7.919076923076919456e+02 5.076701354980469887e+02 -3.904052734375000000e+00 3.030402958393100254e-01 0.000000000000000000e+00 1.523496704101559999e+03 1.658243060111999956e+00 4.000000000000000000e+00 6.946812744140620453e+02 -6.575000000000000000e+01 5.175000000000000000e+01
2.300000000000000000e+01 8.330923076923080544e+02 5.000891113281250000e+02 -3.810241699218750000e+00 3.155253529548650016e-01 6.470588445663449928e-01 1.532558959960940001e+03 1.628576517105100097e+00 3.000000000000000000e+00 6.610869140625000000e+02 -6.525000000000000000e+01 5.175000000000000000e+01
5.200000000000000000e+01 9.535615384615390440e+02 4.842623291015619884e+02 -3.694854736328120115e+00 3.893578648567200262e-01 0.000000000000000000e+00 1.542835937500000000e+03 1.566599130630490055e+00 4.000000000000000000e+00 7.067975463867189774e+02 -6.475000000000000000e+01 5.175000000000000000e+01
4.900000000000000000e+01 9.762846153846149946e+02 4.674471740722660229e+02 -3.579467773437500000e+00 3.731388747692109820e-01 5.882353186607359730e-01 1.553112915039059999e+03 1.554082036018370028e+00 4.000000000000000000e+00 7.424209594726560226e+02 -6.425000000000000000e+01 5.175000000000000000e+01
5.100000000000000000e+01 9.951692307692310351e+02 4.473559265136719887e+02 -3.247222900390620115e+00 2.726007103919980135e-01 0.000000000000000000e+00 1.575050170898440001e+03 1.576299190521240012e+00 4.000000000000000000e+00 6.065104980468750000e+02 -6.325000000000000000e+01 5.175000000000000000e+01
2.300000000000000000e+01 9.934769230769229580e+02 4.440148315429689774e+02 -3.030334472656250000e+00 2.055884301662450064e-01 0.000000000000000000e+00 1.586710571289059999e+03 1.587542295455929953e+00 3.000000000000000000e+00 5.578904418945310226e+02 -6.275000000000000000e+01 5.175000000000000000e+01
6.200000000000000000e+01 1.040815384615380026e+03 4.462725219726560226e+02 -2.813446044921879885e+00 1.802226006984710138e-01 0.000000000000000000e+00 1.598370849609380002e+03 1.603137731552120027e+00 4.000000000000000000e+00 4.587349853515619884e+02 -6.225000000000000000e+01 5.175000000000000000e+01
6.000000000000000000e+01 1.091361538461540022e+03 4.771199340820310226e+02 -1.848205566406250000e+00 1.323461979627610086e-01 0.000000000000000000e+00 1.593658325195309999e+03 1.617668032646180087e+00 4.000000000000000000e+00 4.619710388183589771e+02 -6.075000000000000000e+01 5.175000000000000000e+01
1.200000000000000000e+01 1.085969230769230080e+03 4.726251831054689774e+02 -1.491485595703119893e+00 9.999999776482580358e-03 5.882353186607359730e-01 1.587677124023440001e+03 1.647513508796689896e+00 1.000000000000000000e+00 3.662077026367189774e+02 -6.025000000000000000e+01 5.175000000000000000e+01
5.300000000000000000e+01 1.075253846153849963e+03 5.047204284667969887e+02 -9.715576171875000000e-01 9.999999776482580358e-03 0.000000000000000000e+00 1.579832519531250000e+03 1.703101754188540040e+00 4.000000000000000000e+00 3.769444580078119884e+02 -5.925000000000000000e+01 5.175000000000000000e+01
5.000000000000000000e+01 1.084092307692309987e+03 5.393085327148439774e+02 -7.438659667968750000e-01 9.999999776482580358e-03 1.176470592617989974e-01 1.576596557617190001e+03 1.682635307312009942e+00 4.000000000000000000e+00 2.613114929199219887e+02 -5.875000000000000000e+01 5.175000000000000000e+01
7.000000000000000000e+01 1.118753846153849963e+03 5.544877319335939774e+02 -5.161437988281250000e-01 0.000000000000000000e+00 0.000000000000000000e+00 1.573360595703119998e+03 1.638965725898740011e+00 4.000000000000000000e+00 2.338056640625000000e+02 -5.825000000000000000e+01 5.175000000000000000e+01
5.700000000000000000e+01 1.162984615384619929e+03 5.581643066406250000e+02 -2.987670898437500000e-01 9.999999776482580358e-03 0.000000000000000000e+00 1.565868896484380002e+03 1.449099779129030097e+00 4.000000000000000000e+00 3.452944641113280113e+02 -5.775000000000000000e+01 5.175000000000000000e+01
3.900000000000000000e+01 4.990846153846150060e+02 1.206661987304690058e+02 -2.948303222656250000e-01 0.000000000000000000e+00 2.285714285714290084e-01 2.496429931640619998e+03 1.078829526901250002e+00 3.000000000000000000e+00 2.791193847656250000e+02 -9.925000000000000000e+01 5.225000000000000000e+01
4.200000000000000000e+01 4.903923076923069857e+02 1.195291900634770030e+02 -3.572387695312500000e-01 0.000000000000000000e+00 2.285714285714290084e-01 2.496987792968750000e+03 8.693931698799129970e-01 3.000000000000000000e+00 2.435746307373050001e+02 -9.875000000000000000e+01 5.225000000000000000e+01
3.700000000000000000e+01 6.434230769230770193e+02 1.042174148559570028e+02 -1.138519287109380107e+00 0.000000000000000000e+00 1.428571428571429880e-01 2.386224609375000000e+03 8.515228629112240322e-01 3.000000000000000000e+00 2.693585815429689774e+02 -9.625000000000000000e+01 5.225000000000000000e+01
3.100000000000000000e+01 6.444384615384619792e+02 1.223483123779300001e+02 -1.388610839843750000e+00 0.000000000000000000e+00 2.857142857142859760e-01 2.341361572265619998e+03 8.543316125869749866e-01 3.000000000000000000e+00 3.071921386718750000e+02 -9.575000000000000000e+01 5.225000000000000000e+01
2.600000000000000000e+01 6.496692307692300119e+02 1.619704132080080115e+02 -1.576721191406250000e+00 9.999999776482580358e-03 4.117647111415860262e-01 2.305644775390619998e+03 2.042025566101070222e+00 3.000000000000000000e+00 3.244425659179689774e+02 -9.525000000000000000e+01 5.225000000000000000e+01
4.600000000000000000e+01 6.734923076923070084e+02 2.296433868408199999e+02 -1.911590576171880107e+00 9.999999776482580358e-03 4.705882370471949905e-01 2.240308593750000000e+03 8.594893813133239746e-01 4.000000000000000000e+00 3.464235229492189774e+02 -9.425000000000000000e+01 5.225000000000000000e+01
2.900000000000000000e+01 7.246538461538459615e+02 2.400557861328119884e+02 -2.188690185546879885e+00 9.999999776482580358e-03 2.571428571428570065e-01 2.178973144531250000e+03 1.374262332916259988e+00 3.000000000000000000e+00 3.738237304687500000e+02 -9.325000000000000000e+01 5.225000000000000000e+01
6.000000000000000000e+01 7.515846153846149491e+02 2.513798217773440058e+02 -2.407958984375000000e+00 9.999999776482580358e-03 8.571428571428570120e-02 2.121638427734380002e+03 1.211502313613890047e+00 4.000000000000000000e+00 3.921123962402339771e+02 -9.225000000000000000e+01 5.225000000000000000e+01
5.500000000000000000e+01 7.732307692307690559e+02 2.643965454101560226e+02 -2.515747070312500000e+00 1.086587756872180038e-01 8.823529481887819603e-01 2.094722900390619998e+03 1.244888782501220037e+00 4.000000000000000000e+00 4.108261413574219887e+02 -9.175000000000000000e+01 5.225000000000000000e+01
6.200000000000000000e+01 7.873615384615389985e+02 2.702615356445310226e+02 -2.617980957031250000e+00 1.127694249153139983e-01 2.571428571428570065e-01 2.073062744140619998e+03 1.969556212425229935e+00 4.000000000000000000e+00 3.906453247070310226e+02 -9.125000000000000000e+01 5.225000000000000000e+01
3.600000000000000000e+01 7.957692307692309441e+02 2.744040527343750000e+02 -2.822448730468750000e+00 9.999999776482580358e-03 5.882353186607359730e-01 2.029742187500000000e+03 1.974117875099179908e+00 3.000000000000000000e+00 3.350610351562500000e+02 -9.025000000000000000e+01 5.225000000000000000e+01
5.300000000000000000e+01 7.682000000000000455e+02 2.773247375488280113e+02 -3.055999755859379885e+00 1.096836999058719980e-01 5.882353186607359730e-01 1.989874145507809999e+03 1.939920067787169966e+00 4.000000000000000000e+00 2.918075866699219887e+02 -8.925000000000000000e+01 5.225000000000000000e+01
5.700000000000000000e+01 7.455769230769229807e+02 2.762142639160160229e+02 -3.177612304687500000e+00 1.181697025895119962e-01 3.714285714285709972e-01 1.970515380859380002e+03 1.535601615905759942e+00 4.000000000000000000e+00 2.621456604003910229e+02 -8.875000000000000000e+01 5.225000000000000000e+01
6.300000000000000000e+01 7.279769230769239812e+02 2.770460510253910229e+02 -3.299255371093750000e+00 1.233230829238889936e-01 2.941176593303679865e-01 1.951156738281250000e+03 1.933636188507080078e+00 4.000000000000000000e+00 2.520926513671880116e+02 -8.825000000000000000e+01 5.225000000000000000e+01
4.600000000000000000e+01 7.102000000000000455e+02 2.776895751953119884e+02 -3.378906250000000000e+00 1.375659108161929878e-01 1.714285714285710138e-01 1.938261718750000000e+03 1.917183756828310104e+00 4.000000000000000000e+00 2.606851196289060226e+02 -8.775000000000000000e+01 5.225000000000000000e+01
1.300000000000000000e+01 6.844538461538460297e+02 2.792373657226560226e+02 -3.510284423828120115e+00 1.201531291008000046e-01 2.000000000000000111e-01 1.916780761718750000e+03 1.932011604309080033e+00 1.000000000000000000e+00 2.086236114501949999e+02 -8.675000000000000000e+01 5.225000000000000000e+01
1.700000000000000000e+01 6.656153846153839595e+02 2.798366699218750000e+02 -3.575958251953120115e+00 1.201978400349620058e-01 0.000000000000000000e+00 1.906040405273440001e+03 1.930486559867859997e+00 1.000000000000000000e+00 1.837758636474609943e+02 -8.625000000000000000e+01 5.225000000000000000e+01
5.900000000000000000e+01 6.372076923076920139e+02 2.920209045410160229e+02 -3.369140625000000000e+00 1.367470026016240070e-01 5.294117927551269531e-01 1.918243041992190001e+03 1.894285559654240059e+00 4.000000000000000000e+00 1.554116058349609943e+02 -8.475000000000000000e+01 5.225000000000000000e+01
3.200000000000000000e+01 6.221538461538459615e+02 3.115459289550780113e+02 -3.267242431640620115e+00 1.257717162370680097e-01 2.941176593303679865e-01 1.924666748046880002e+03 1.888614773750310061e+00 3.000000000000000000e+00 1.271269683837890057e+02 -8.425000000000000000e+01 5.225000000000000000e+01
6.000000000000000000e+00 6.172846153846149946e+02 3.352937927246089771e+02 -3.066467285156250000e+00 1.201985552906990051e-01 8.571428571428570120e-02 1.938158569335940001e+03 1.878993988037110041e+00 1.000000000000000000e+00 8.603842926025390625e+01 -8.375000000000000000e+01 5.225000000000000000e+01
3.800000000000000000e+01 6.066615384615380435e+02 3.386948547363280113e+02 -2.865692138671879885e+00 1.173500120639800054e-01 2.857142857142859829e-02 1.951650390625000000e+03 1.869069933891299939e+00 3.000000000000000000e+00 5.864216995239259944e+01 -8.325000000000000000e+01 5.225000000000000000e+01
2.800000000000000000e+01 5.934076923076919456e+02 3.376535644531250000e+02 -2.664916992187500000e+00 1.144655197858810008e-01 2.571428571428570065e-01 1.965142211914059999e+03 1.866454124450680041e+00 3.000000000000000000e+00 4.468138504028320312e+01 -8.275000000000000000e+01 5.225000000000000000e+01
2.400000000000000000e+01 5.785538461538460524e+02 3.369729614257810226e+02 -2.773864746093750000e+00 1.125414073467250059e-01 3.142857142857140018e-01 1.864672119140619998e+03 1.865608692169189897e+00 3.000000000000000000e+00 3.834385681152340197e+01 -8.225000000000000000e+01 5.225000000000000000e+01
1.400000000000000000e+01 6.888846153846150173e+02 3.673020019531250000e+02 -2.598663330078120115e+00 1.186616718769070017e-01 3.142857142857140018e-01 1.906228149414059999e+03 7.376835942268370472e-01 1.000000000000000000e+00 2.981931495666499998e+01 -7.825000000000000000e+01 5.225000000000000000e+01
5.200000000000000000e+01 7.152307692307699654e+02 3.755381469726560226e+02 -2.871612548828120115e+00 1.451748162508010032e-01 4.117647111415860262e-01 1.860370117187500000e+03 7.304226160049439587e-01 4.000000000000000000e+00 1.307817840576169885e+02 -7.775000000000000000e+01 5.225000000000000000e+01
3.500000000000000000e+01 7.376076923076919911e+02 3.829247131347660229e+02 -3.144561767578120115e+00 1.770375072956089924e-01 3.428571428571430268e-01 1.814512084960940001e+03 7.210268974304200329e-01 3.000000000000000000e+00 1.767404937744140057e+02 -7.725000000000000000e+01 5.225000000000000000e+01
1.900000000000000000e+01 7.716000000000000227e+02 3.868736877441410229e+02 -3.415435791015620115e+00 2.117312997579569867e-01 5.882353186607359730e-01 1.769912597656250000e+03 7.099088430404659755e-01 1.000000000000000000e+00 2.339751586914059942e+02 -7.675000000000000000e+01 5.225000000000000000e+01
5.100000000000000000e+01 7.862692307692309441e+02 3.892125549316410229e+02 -3.680145263671879885e+00 1.849405467510220058e-01 3.714285714285709972e-01 1.729088745117190001e+03 7.064110040664669521e-01 4.000000000000000000e+00 2.368056945800780113e+02 -7.625000000000000000e+01 5.225000000000000000e+01
4.400000000000000000e+01 7.900384615384620020e+02 3.962476501464839771e+02 -3.944824218750000000e+00 1.907654553651809970e-01 9.411764740943909802e-01 1.688264892578119998e+03 9.010095596313479893e-01 3.000000000000000000e+00 2.749458007812500000e+02 -7.575000000000000000e+01 5.225000000000000000e+01
4.500000000000000000e+01 7.955692307692310123e+02 4.055935974121089771e+02 -4.209503173828119671e+00 2.120041847229000020e-01 6.470588445663449928e-01 1.647441040039059999e+03 7.306227684021000535e-01 4.000000000000000000e+00 2.878169555664060226e+02 -7.525000000000000000e+01 5.225000000000000000e+01
3.100000000000000000e+01 8.713153846153850282e+02 4.032855834960939774e+02 -4.615051269531250000e+00 2.757488489150999866e-01 7.058823704719540126e-01 1.559695068359380002e+03 1.511428356170650078e+00 3.000000000000000000e+00 3.833216552734380116e+02 -7.375000000000000000e+01 5.225000000000000000e+01
2.300000000000000000e+01 8.922538461538470074e+02 4.010682983398439774e+02 -4.716033935546880329e+00 3.130624592304229736e-01 5.882353186607359730e-01 1.513739501953119998e+03 6.618939042091369629e-01 3.000000000000000000e+00 4.525880737304689774e+02 -7.275000000000000000e+01 5.225000000000000000e+01
2.400000000000000000e+01 9.471076923076919911e+02 4.028698730468750000e+02 -4.668487548828119671e+00 4.119878113269809794e-01 6.470588445663449928e-01 1.497354736328119998e+03 6.883936524391169876e-01 3.000000000000000000e+00 5.373118896484379547e+02 -7.225000000000000000e+01 5.225000000000000000e+01
5.300000000000000000e+01 9.793999999999999773e+02 4.044702148437500000e+02 -4.620941162109380329e+00 5.262298583984380551e-01 8.235294222831730515e-01 1.480970092773440001e+03 8.974688649177550159e-01 4.000000000000000000e+00 6.140061645507810226e+02 -7.175000000000000000e+01 5.225000000000000000e+01
1.300000000000000000e+01 9.609923076923080316e+02 4.060129699707030113e+02 -4.573394775390619671e+00 4.324540495872499779e-01 2.941176593303679865e-01 1.464585449218750000e+03 1.023501276969909890e+00 1.000000000000000000e+00 6.834646606445310226e+02 -7.125000000000000000e+01 5.225000000000000000e+01
3.400000000000000000e+01 9.935230769230770420e+02 4.113898620605469887e+02 -4.536773681640619671e+00 6.456978321075439453e-01 2.941176593303679865e-01 1.455945312500000000e+03 1.219814896583560015e+00 3.000000000000000000e+00 8.649734497070310226e+02 -7.075000000000000000e+01 5.225000000000000000e+01
2.900000000000000000e+01 9.855538461538460524e+02 4.416241149902339771e+02 -4.449218750000000000e+00 3.652600944042210251e-01 5.882353186607359730e-01 1.430436279296880002e+03 1.613513588905330032e+00 3.000000000000000000e+00 6.627029418945310226e+02 -6.925000000000000000e+01 5.225000000000000000e+01
5.200000000000000000e+01 9.791769230769230035e+02 4.828850097656250000e+02 -4.657836914062500000e+00 3.442216813564299982e-01 2.941176593303679865e-01 1.405895629882809999e+03 1.223823308944699928e+00 4.000000000000000000e+00 6.593026123046879547e+02 -6.725000000000000000e+01 5.225000000000000000e+01
5.100000000000000000e+01 8.969230769230770193e+02 4.839289550781250000e+02 -4.706604003906250000e+00 3.013567030429840088e-01 2.941176593303679865e-01 1.405776855468750000e+03 1.563863754272460049e+00 4.000000000000000000e+00 5.849812011718750000e+02 -6.675000000000000000e+01 5.225000000000000000e+01
1.600000000000000000e+01 7.997538461538459842e+02 4.796292724609380116e+02 -4.804168701171880329e+00 3.348051607608800162e-01 0.000000000000000000e+00 1.405539184570309999e+03 1.608154773712159979e+00 1.000000000000000000e+00 5.894629516601560226e+02 -6.575000000000000000e+01 5.225000000000000000e+01
4.600000000000000000e+01 8.382000000000000455e+02 4.594784851074219887e+02 -4.767791748046880329e+00 4.173228740692139782e-01 0.000000000000000000e+00 1.412469238281250000e+03 1.590043902397159981e+00 4.000000000000000000e+00 6.789588623046879547e+02 -6.525000000000000000e+01 5.225000000000000000e+01
4.100000000000000000e+01 8.858615384615379753e+02 4.234013977050780113e+02 -4.703063964843750000e+00 3.099287748336789772e-01 0.000000000000000000e+00 1.421748901367190001e+03 1.583799481391910069e+00 3.000000000000000000e+00 5.970218505859379547e+02 -6.475000000000000000e+01 5.225000000000000000e+01
2.300000000000000000e+01 9.039692307692309896e+02 3.955249938964839771e+02 -4.638336181640619671e+00 2.994574606418610174e-01 0.000000000000000000e+00 1.431028686523440001e+03 1.595801115036010076e+00 3.000000000000000000e+00 5.318776245117189774e+02 -6.425000000000000000e+01 5.225000000000000000e+01
4.700000000000000000e+01 9.292999999999990450e+02 3.921983642578119884e+02 -4.573608398437500000e+00 2.160229980945589934e-01 2.352941185235979948e-01 1.440308349609380002e+03 1.604052305221560060e+00 4.000000000000000000e+00 4.947520446777339771e+02 -6.375000000000000000e+01 5.225000000000000000e+01
4.000000000000000000e+01 9.503230769230769965e+02 3.907983093261719887e+02 -4.349700927734380329e+00 2.505666613578800272e-01 0.000000000000000000e+00 1.455065673828119998e+03 1.460273742675779918e+00 3.000000000000000000e+00 5.462098388671879547e+02 -6.325000000000000000e+01 5.225000000000000000e+01
4.700000000000000000e+01 9.822999999999999545e+02 3.935346374511719887e+02 -4.125793457031250000e+00 2.445173114538189973e-01 0.000000000000000000e+00 1.469822998046880002e+03 1.550946116447450063e+00 4.000000000000000000e+00 5.274482421875000000e+02 -6.275000000000000000e+01 5.225000000000000000e+01
6.800000000000000000e+01 1.022969230769229966e+03 4.330146484375000000e+02 -3.640930175781250000e+00 1.899333000183109910e-01 0.000000000000000000e+00 1.498712524414059999e+03 1.623823642730710004e+00 4.000000000000000000e+00 4.749559326171880116e+02 -6.175000000000000000e+01 5.225000000000000000e+01
6.800000000000000000e+01 1.048123076923079907e+03 4.568274536132810226e+02 -3.268737792968750000e+00 1.776243299245829910e-01 0.000000000000000000e+00 1.510969726562500000e+03 1.626996517181400037e+00 4.000000000000000000e+00 4.361133728027339771e+02 -6.125000000000000000e+01 5.225000000000000000e+01
6.900000000000000000e+01 1.067169230769229898e+03 4.853880615234380116e+02 -2.896545410156250000e+00 1.389860808849329998e-01 2.352941185235979948e-01 1.523227050781250000e+03 1.629170417785640090e+00 4.000000000000000000e+00 3.710461730957030113e+02 -6.075000000000000000e+01 5.225000000000000000e+01
6.700000000000000000e+01 1.117169230769229898e+03 5.130500488281250000e+02 -2.177520751953120115e+00 1.532130539417269899e-01 2.941176593303679865e-01 1.544548950195309999e+03 1.592378735542300028e+00 4.000000000000000000e+00 4.391159057617189774e+02 -5.975000000000000000e+01 5.225000000000000000e+01
1.300000000000000000e+01 1.136723076923080043e+03 5.299232788085939774e+02 -1.855987548828119893e+00 1.430359482765199974e-01 0.000000000000000000e+00 1.550421142578119998e+03 9.485390186309810012e-01 1.000000000000000000e+00 4.383841857910160229e+02 -5.925000000000000000e+01 5.225000000000000000e+01
4.500000000000000000e+01 1.167907692307690013e+03 5.509283447265620453e+02 -1.534454345703119893e+00 1.641822308301930100e-01 0.000000000000000000e+00 1.556293457031250000e+03 9.134303331375119850e-01 4.000000000000000000e+00 5.152407226562500000e+02 -5.875000000000000000e+01 5.225000000000000000e+01
6.100000000000000000e+01 1.172469230769230080e+03 5.574579467773439774e+02 -1.212951660156250000e+00 9.999999776482580358e-03 0.000000000000000000e+00 1.562165649414059999e+03 1.375530242919920099e+00 4.000000000000000000e+00 3.617422485351560226e+02 -5.825000000000000000e+01 5.225000000000000000e+01
5.100000000000000000e+01 1.195646153846149900e+03 5.082822570800780113e+02 -3.425598144531250000e-01 9.999999776482580358e-03 0.000000000000000000e+00 1.553686279296880002e+03 6.005246043205260120e-01 4.000000000000000000e+00 3.579460144042969887e+02 -5.675000000000000000e+01 5.225000000000000000e+01
3.000000000000000000e+01 1.181707692307689967e+03 4.479214782714839771e+02 -5.526733398437500000e-02 9.999999776482580358e-03 0.000000000000000000e+00 1.550068969726559999e+03 6.034866571426390491e-01 3.000000000000000000e+00 2.046462249755859943e+02 -5.625000000000000000e+01 5.225000000000000000e+01
3.600000000000000000e+01 5.024461538461540044e+02 1.520909576416019888e+02 -7.103271484375000000e-01 0.000000000000000000e+00 0.000000000000000000e+00 2.429514892578119998e+03 8.722255825996400036e-01 3.000000000000000000e+00 2.605032653808589771e+02 -9.925000000000000000e+01 5.275000000000000000e+01
6.200000000000000000e+01 6.298230769230769965e+02 1.225549392700200002e+02 -1.649658203125000000e+00 0.000000000000000000e+00 5.882353186607359730e-01 2.312769531250000000e+03 8.392591476440429688e-01 4.000000000000000000e+00 2.684009094238280113e+02 -9.625000000000000000e+01 5.275000000000000000e+01
6.800000000000000000e+01 6.358230769230769965e+02 1.531148223876949999e+02 -1.899169921875000000e+00 9.999999776482580358e-03 8.823529481887819603e-01 2.271010498046880002e+03 8.420237898826600231e-01 4.000000000000000000e+00 2.983446960449219887e+02 -9.575000000000000000e+01 5.275000000000000000e+01
3.500000000000000000e+01 6.674153846153850509e+02 2.610229187011719887e+02 -2.381195068359379885e+00 9.999999776482580358e-03 7.647058963775630325e-01 2.174449707031250000e+03 8.358255624771120385e-01 3.000000000000000000e+00 3.272039184570310226e+02 -9.425000000000000000e+01 5.275000000000000000e+01
5.600000000000000000e+01 7.119846153846150401e+02 2.704045104980469887e+02 -2.626342773437500000e+00 9.999999776482580358e-03 4.285714285714289917e-01 2.116957031250000000e+03 8.346176743507389695e-01 4.000000000000000000e+00 3.143724365234380116e+02 -9.325000000000000000e+01 5.275000000000000000e+01
6.700000000000000000e+01 7.149615384615379980e+02 2.663558349609380116e+02 -2.718872070312500000e+00 9.999999776482580358e-03 5.882353186607359730e-01 2.090781005859380002e+03 1.008666872978210005e+00 4.000000000000000000e+00 3.087387084960939774e+02 -9.275000000000000000e+01 5.275000000000000000e+01
2.000000000000000000e+01 7.309846153846150401e+02 2.616279296875000000e+02 -2.811401367187500000e+00 9.999999776482580358e-03 4.285714285714289917e-01 2.064604980468750000e+03 1.490094661712650037e+00 3.000000000000000000e+00 3.155201416015619884e+02 -9.225000000000000000e+01 5.275000000000000000e+01
6.500000000000000000e+01 7.452076923076920139e+02 2.687752075195310226e+02 -2.904876708984379885e+00 1.195028722286220063e-01 2.000000000000000111e-01 2.039539428710940001e+03 1.956904649734499957e+00 4.000000000000000000e+00 3.172637023925780113e+02 -9.175000000000000000e+01 5.275000000000000000e+01
5.300000000000000000e+01 7.573538461538460069e+02 2.642536315917969887e+02 -3.001190185546879885e+00 1.373559385538100086e-01 4.117647111415860262e-01 2.017805419921880002e+03 1.940058231353759988e+00 4.000000000000000000e+00 3.313486938476560226e+02 -9.125000000000000000e+01 5.275000000000000000e+01
2.900000000000000000e+01 7.513923076923069857e+02 2.671164855957030113e+02 -3.193847656250000000e+00 1.362945884466169877e-01 5.999999999999999778e-01 1.974337524414059999e+03 1.941096425056459962e+00 3.000000000000000000e+00 3.020862731933589771e+02 -9.025000000000000000e+01 5.275000000000000000e+01
3.900000000000000000e+01 7.460461538461539703e+02 2.653229675292969887e+02 -3.304443359375000000e+00 1.437240839004519932e-01 3.428571428571430268e-01 1.952621459960940001e+03 1.927894949913020017e+00 3.000000000000000000e+00 2.833059082031250000e+02 -8.975000000000000000e+01 5.275000000000000000e+01
6.500000000000000000e+01 7.372538461538459842e+02 2.622814941406250000e+02 -3.429290771484379885e+00 1.475285291671749877e-01 2.857142857142859760e-01 1.930923339843750000e+03 1.918569684028629929e+00 4.000000000000000000e+00 2.723562316894530113e+02 -8.925000000000000000e+01 5.275000000000000000e+01
5.300000000000000000e+01 7.107923076923079861e+02 2.684473266601560226e+02 -3.679016113281250000e+00 1.732140183448790116e-01 2.000000000000000111e-01 1.887526977539059999e+03 1.906288862228390002e+00 4.000000000000000000e+00 2.437927093505859943e+02 -8.825000000000000000e+01 5.275000000000000000e+01
3.100000000000000000e+01 6.900692307692310123e+02 2.763525695800780113e+02 -3.826354980468750000e+00 1.890784502029420056e-01 1.714285714285710138e-01 1.858174438476559999e+03 1.883088350296020064e+00 3.000000000000000000e+00 2.004393463134769888e+02 -8.725000000000000000e+01 5.275000000000000000e+01
4.000000000000000000e+01 6.648999999999999773e+02 2.776918640136719887e+02 -3.892700195312500000e+00 1.576946079730990047e-01 1.142857142857140046e-01 1.844501220703119998e+03 1.903575420379640004e+00 3.000000000000000000e+00 1.848229827880859943e+02 -8.675000000000000000e+01 5.275000000000000000e+01
6.000000000000000000e+01 6.536769230769230035e+02 2.768323669433589771e+02 -3.959075927734379885e+00 1.661595106124879873e-01 2.857142857142859829e-02 1.830828125000000000e+03 1.899810552597049895e+00 4.000000000000000000e+00 1.685070953369140057e+02 -8.625000000000000000e+01 5.275000000000000000e+01
2.800000000000000000e+01 6.450846153846149491e+02 2.736302185058589771e+02 -3.885375976562500000e+00 1.711216270923610061e-01 2.857142857142859829e-02 1.832346191406250000e+03 1.881765961647029917e+00 3.000000000000000000e+00 1.574799804687500000e+02 -8.575000000000000000e+01 5.275000000000000000e+01
3.100000000000000000e+01 6.332692307692309441e+02 2.720780639648439774e+02 -3.811676025390620115e+00 1.738470494747159922e-01 2.352941185235979948e-01 1.833864257812500000e+03 1.867064237594600051e+00 3.000000000000000000e+00 1.412233734130859943e+02 -8.525000000000000000e+01 5.275000000000000000e+01
4.000000000000000000e+01 6.230538461538460524e+02 2.747363281250000000e+02 -3.737976074218750000e+00 1.877507418394090133e-01 1.428571428571429880e-01 1.835382324218750000e+03 1.857537746429440029e+00 3.000000000000000000e+00 1.446756896972659945e+02 -8.475000000000000000e+01 5.275000000000000000e+01
3.000000000000000000e+01 6.053461538461540385e+02 2.846905212402339771e+02 -3.632995605468750000e+00 1.601949185132980069e-01 5.882353186607359730e-01 1.839464355468750000e+03 1.853041768074040085e+00 3.000000000000000000e+00 9.759201049804690342e+01 -8.425000000000000000e+01 5.275000000000000000e+01
3.200000000000000000e+01 5.986923076923079634e+02 3.064707946777339771e+02 -3.434051513671879885e+00 1.628028005361560060e-01 8.571428571428570120e-02 1.851237792968750000e+03 1.842801570892329988e+00 3.000000000000000000e+00 7.985486602783200283e+01 -8.375000000000000000e+01 5.275000000000000000e+01
1.200000000000000000e+01 5.899307692307689877e+02 3.188478698730469887e+02 -3.235107421875000000e+00 1.553585827350620063e-01 3.529411852359770063e-01 1.863011230468750000e+03 1.831408619880680044e+00 1.000000000000000000e+00 4.284396362304690342e+01 -8.325000000000000000e+01 5.275000000000000000e+01
5.500000000000000000e+01 5.779461538461539476e+02 3.236518859863280113e+02 -3.036193847656250000e+00 1.503096073865889948e-01 5.714285714285709944e-02 1.874784667968750000e+03 1.828247189521789995e+00 4.000000000000000000e+00 2.268241500854490056e+01 -8.275000000000000000e+01 5.275000000000000000e+01
1.100000000000000000e+01 6.781000000000000227e+02 3.767337036132810226e+02 -2.935882568359379885e+00 1.489255726337430086e-01 1.428571428571429880e-01 1.825751098632809999e+03 7.258946299552919701e-01 1.000000000000000000e+00 6.026620483398440342e+01 -7.825000000000000000e+01 5.275000000000000000e+01
1.700000000000000000e+01 7.046846153846149718e+02 3.823118286132810226e+02 -3.202636718750000000e+00 1.888113319873810092e-01 2.285714285714290084e-01 1.783880981445309999e+03 7.170402407646180309e-01 1.000000000000000000e+00 1.279920120239259944e+02 -7.775000000000000000e+01 5.275000000000000000e+01
3.900000000000000000e+01 7.264153846153840277e+02 3.857262573242189774e+02 -3.469360351562500000e+00 2.114136964082720116e-01 2.571428571428570065e-01 1.742010864257809999e+03 7.084628939628599964e-01 3.000000000000000000e+00 1.912310638427730112e+02 -7.725000000000000000e+01 5.275000000000000000e+01
2.500000000000000000e+01 7.725846153846149491e+02 3.859028320312500000e+02 -3.992401123046879885e+00 2.342623770236970104e-01 3.142857142857140018e-01 1.663889160156250000e+03 6.919341087341309704e-01 3.000000000000000000e+00 2.399043426513669885e+02 -7.625000000000000000e+01 5.275000000000000000e+01
2.900000000000000000e+01 7.795923076923080544e+02 3.816817626953119884e+02 -4.250793457031250000e+00 2.527895867824550002e-01 5.882353186607359730e-01 1.626513793945309999e+03 6.894083619117740147e-01 3.000000000000000000e+00 2.599295959472660229e+02 -7.575000000000000000e+01 5.275000000000000000e+01
2.000000000000000000e+01 7.870230769230770420e+02 3.809543151855469887e+02 -4.509155273437500000e+00 2.714009582996370074e-01 5.882353186607359730e-01 1.589138549804690001e+03 6.834262609481810413e-01 3.000000000000000000e+00 2.890841674804689774e+02 -7.525000000000000000e+01 5.275000000000000000e+01
4.100000000000000000e+01 8.292923076923079861e+02 3.821936035156250000e+02 -4.689697265625000000e+00 3.361473381519319847e-01 3.529411852359770063e-01 1.558064575195309999e+03 6.689332723617550380e-01 3.000000000000000000e+00 3.693159484863280113e+02 -7.475000000000000000e+01 5.275000000000000000e+01
5.100000000000000000e+01 8.382769230769220030e+02 3.863203735351560226e+02 -4.792388916015619671e+00 3.721698522567750134e-01 8.823529481887819603e-01 1.533292236328119998e+03 6.609249711036679908e-01 4.000000000000000000e+00 3.722649841308589771e+02 -7.425000000000000000e+01 5.275000000000000000e+01
5.400000000000000000e+01 8.487769230769230262e+02 3.889319458007810226e+02 -4.895080566406250000e+00 3.320329487323759876e-01 2.857142857142859829e-02 1.508519775390619998e+03 6.570490598678589977e-01 4.000000000000000000e+00 3.901697082519530113e+02 -7.375000000000000000e+01 5.275000000000000000e+01
1.700000000000000000e+01 8.575923076923080544e+02 3.925819702148439774e+02 -4.997772216796880329e+00 4.324283003807070092e-01 2.941176593303679865e-01 1.483747436523440001e+03 6.550968289375309617e-01 1.000000000000000000e+00 4.755109558105469887e+02 -7.325000000000000000e+01 5.275000000000000000e+01
1.600000000000000000e+01 8.710615384615380208e+02 3.954797363281250000e+02 -4.988983154296880329e+00 3.816587626934049848e-01 8.823529481887819603e-01 1.465323852539059999e+03 6.486997008323670544e-01 1.000000000000000000e+00 4.891681213378910229e+02 -7.275000000000000000e+01 5.275000000000000000e+01
2.400000000000000000e+01 8.935846153846159723e+02 3.993074951171880116e+02 -4.943054199218750000e+00 3.741276860237119917e-01 2.941176593303679865e-01 1.449016479492190001e+03 7.367696166038509853e-01 3.000000000000000000e+00 4.714584045410160229e+02 -7.225000000000000000e+01 5.275000000000000000e+01
4.000000000000000000e+01 9.501076923076930143e+02 4.025619506835939774e+02 -4.897094726562500000e+00 4.496317803859710138e-01 7.647058963775630325e-01 1.432709228515619998e+03 1.047899127006530096e+00 3.000000000000000000e+00 5.595378417968750000e+02 -7.175000000000000000e+01 5.275000000000000000e+01
2.500000000000000000e+01 9.308615384615379753e+02 4.047433471679689774e+02 -4.851165771484380329e+00 4.405549168586729847e-01 3.529411852359770063e-01 1.416401855468750000e+03 1.086697459220890005e+00 3.000000000000000000e+00 5.636305541992189774e+02 -7.125000000000000000e+01 5.275000000000000000e+01
7.000000000000000000e+00 9.495846153846159723e+02 4.395285949707030113e+02 -4.781890869140619671e+00 3.900029957294460226e-01 2.941176593303679865e-01 1.385485717773440001e+03 1.344387888908390005e+00 1.000000000000000000e+00 6.316572875976560226e+02 -6.975000000000000000e+01 5.275000000000000000e+01
3.100000000000000000e+01 9.548923076923080089e+02 4.550722656250000000e+02 -4.783691406250000000e+00 4.037780463695530009e-01 0.000000000000000000e+00 1.375436523437500000e+03 1.346886992454529919e+00 3.000000000000000000e+00 6.483457641601560226e+02 -6.925000000000000000e+01 5.275000000000000000e+01
1.600000000000000000e+01 9.683615384615389985e+02 4.682633361816410229e+02 -4.860168457031250000e+00 3.764705061912539952e-01 0.000000000000000000e+00 1.366156250000000000e+03 1.342240810394289996e+00 1.000000000000000000e+00 6.706712036132810226e+02 -6.875000000000000000e+01 5.275000000000000000e+01
1.600000000000000000e+01 9.649076923076919456e+02 4.768474426269530113e+02 -4.936614990234380329e+00 3.820409178733830124e-01 2.941176593303679865e-01 1.356875854492190001e+03 1.326101064682009945e+00 1.000000000000000000e+00 6.478508300781250000e+02 -6.825000000000000000e+01 5.275000000000000000e+01
3.800000000000000000e+01 9.553384615384610470e+02 4.794615173339839771e+02 -5.013061523437500000e+00 3.748289048671720192e-01 0.000000000000000000e+00 1.347595581054690001e+03 1.316919803619380103e+00 3.000000000000000000e+00 6.437436523437500000e+02 -6.775000000000000000e+01 5.275000000000000000e+01
2.600000000000000000e+01 9.176615384615380435e+02 4.800156250000000000e+02 -5.088928222656250000e+00 5.171590447425840065e-01 5.882352963089940157e-02 1.341975830078119998e+03 9.452934265136719860e-01 3.000000000000000000e+00 6.918314819335939774e+02 -6.725000000000000000e+01 5.275000000000000000e+01
1.200000000000000000e+01 8.828846153846160405e+02 4.801407165527339771e+02 -5.164154052734380329e+00 3.504050374031070225e-01 2.941176593303679865e-01 1.340016723632809999e+03 1.340147614479060056e+00 1.000000000000000000e+00 6.053684082031250000e+02 -6.675000000000000000e+01 5.275000000000000000e+01
3.900000000000000000e+01 9.557076923076920139e+02 3.646621704101560226e+02 -4.872497558593750000e+00 3.264421820640560079e-01 0.000000000000000000e+00 1.384717163085940001e+03 1.524299383163449928e+00 3.000000000000000000e+00 5.570805664062500000e+02 -6.325000000000000000e+01 5.275000000000000000e+01
6.300000000000000000e+01 9.801461538461539931e+02 4.455589599609380116e+02 -4.092376708984380329e+00 1.841091364622119975e-01 0.000000000000000000e+00 1.433473510742190001e+03 1.642592072486880106e+00 4.000000000000000000e+00 4.176113586425780113e+02 -6.175000000000000000e+01 5.275000000000000000e+01
5.300000000000000000e+01 1.051730769230769965e+03 5.005212402343750000e+02 -3.296936035156250000e+00 2.150969952344889968e-01 0.000000000000000000e+00 1.466199340820309999e+03 1.634405612945559971e+00 4.000000000000000000e+00 4.427646179199219887e+02 -6.075000000000000000e+01 5.275000000000000000e+01
7.200000000000000000e+01 1.055961538461539931e+03 5.103972167968750000e+02 -2.899200439453120115e+00 1.050765588879589985e-01 0.000000000000000000e+00 1.482562255859380002e+03 1.624013781547549939e+00 4.000000000000000000e+00 2.888370971679689774e+02 -6.025000000000000000e+01 5.275000000000000000e+01
6.000000000000000000e+01 1.104523076923079998e+03 5.159888305664060226e+02 -2.514648437500000000e+00 1.561134904623029951e-01 0.000000000000000000e+00 1.495607055664059999e+03 1.526994824409479978e+00 4.000000000000000000e+00 4.204334716796880116e+02 -5.975000000000000000e+01 5.275000000000000000e+01
5.100000000000000000e+01 1.130184615384619974e+03 5.247004394531250000e+02 -2.143249511718750000e+00 1.311841905117029916e-01 0.000000000000000000e+00 1.505333862304690001e+03 1.543492674827579902e+00 4.000000000000000000e+00 3.681112365722660229e+02 -5.925000000000000000e+01 5.275000000000000000e+01
4.300000000000000000e+01 1.144161538461539976e+03 5.363370971679689774e+02 -1.771850585937500000e+00 1.172099336981770046e-01 0.000000000000000000e+00 1.515060546875000000e+03 1.359657526016240014e+00 3.000000000000000000e+00 3.700299377441410229e+02 -5.875000000000000000e+01 5.275000000000000000e+01
6.300000000000000000e+01 1.173169230769229898e+03 5.426690673828120453e+02 -1.078857421875000000e+00 1.093920990824699957e-01 0.000000000000000000e+00 1.515560424804690001e+03 6.088246107101440430e-01 4.000000000000000000e+00 3.679127197265619884e+02 -5.775000000000000000e+01 5.275000000000000000e+01
5.900000000000000000e+01 1.175369230769229944e+03 5.247181396484379547e+02 -7.738342285156250000e-01 9.999999776482580358e-03 0.000000000000000000e+00 1.500015625000000000e+03 6.035017967224119984e-01 4.000000000000000000e+00 3.426024475097660229e+02 -5.725000000000000000e+01 5.275000000000000000e+01
5.600000000000000000e+01 1.158900000000000091e+03 4.947033996582030113e+02 -4.688415527343750000e-01 9.999999776482580358e-03 0.000000000000000000e+00 1.484470825195309999e+03 6.118850708007810280e-01 4.000000000000000000e+00 1.988577880859380116e+02 -5.675000000000000000e+01 5.275000000000000000e+01
3.100000000000000000e+01 5.953230769230769965e+02 1.754204864501949999e+02 -1.989898681640619893e+00 9.999999776482580358e-03 2.352941185235979948e-01 2.268322021484380002e+03 9.838526844978330299e-01 3.000000000000000000e+00 2.564339599609380116e+02 -9.675000000000000000e+01 5.325000000000000000e+01
4.600000000000000000e+01 6.057769230769230262e+02 1.847959899902340055e+02 -2.228363037109379885e+00 9.999999776482580358e-03 3.714285714285709972e-01 2.232230712890619998e+03 1.451994657516479936e+00 4.000000000000000000e+00 2.757897644042969887e+02 -9.625000000000000000e+01 5.325000000000000000e+01
2.700000000000000000e+01 6.227461538461540158e+02 2.169930877685550001e+02 -2.466827392578120115e+00 9.999999776482580358e-03 2.941176593303679865e-01 2.196139648437500000e+03 1.356735467910769932e+00 3.000000000000000000e+00 3.003039245605469887e+02 -9.575000000000000000e+01 5.325000000000000000e+01
4.200000000000000000e+01 6.332076923076920139e+02 2.555144958496090055e+02 -2.627441406250000000e+00 9.999999776482580358e-03 6.470588445663449928e-01 2.164546630859380002e+03 8.248863220214840419e-01 3.000000000000000000e+00 2.995675964355469887e+02 -9.525000000000000000e+01 5.325000000000000000e+01
6.500000000000000000e+01 6.458615384615379753e+02 2.839701538085939774e+02 -2.762145996093750000e+00 9.999999776482580358e-03 3.714285714285709972e-01 2.134452880859380002e+03 8.243936300277709961e-01 4.000000000000000000e+00 3.031457824707030113e+02 -9.475000000000000000e+01 5.325000000000000000e+01
5.300000000000000000e+01 6.555769230769229807e+02 2.979230041503910229e+02 -2.896820068359379885e+00 9.999999776482580358e-03 5.294117927551269531e-01 2.104359375000000000e+03 8.218062520027159534e-01 4.000000000000000000e+00 3.032281799316410229e+02 -9.425000000000000000e+01 5.325000000000000000e+01
6.600000000000000000e+01 6.665538461538460524e+02 3.026637573242189774e+02 -3.031494140625000000e+00 9.999999776482580358e-03 8.235294222831730515e-01 2.074265625000000000e+03 8.786289691925049938e-01 4.000000000000000000e+00 2.834273376464839771e+02 -9.375000000000000000e+01 5.325000000000000000e+01
5.000000000000000000e+01 6.751153846153849827e+02 3.012684936523439774e+02 -3.096618652343750000e+00 1.132126897573469959e-01 2.857142857142859760e-01 2.051737304687500000e+03 1.876030206680300072e+00 4.000000000000000000e+00 3.010188903808589771e+02 -9.325000000000000000e+01 5.325000000000000000e+01
3.000000000000000000e+01 6.954615384615390212e+02 2.943443908691410229e+02 -3.161773681640620115e+00 1.206141486763949999e-01 8.235294222831730515e-01 2.029208984375000000e+03 1.216523289680480069e+00 3.000000000000000000e+00 3.080261840820310226e+02 -9.275000000000000000e+01 5.325000000000000000e+01
2.300000000000000000e+01 7.126153846153849827e+02 2.493943939208980112e+02 -3.294860839843750000e+00 1.506759375333789897e-01 2.571428571428570065e-01 1.984519287109380002e+03 1.947623014450069912e+00 3.000000000000000000e+00 3.067828979492189774e+02 -9.175000000000000000e+01 5.325000000000000000e+01
4.700000000000000000e+01 7.114846153846150401e+02 2.422872619628909945e+02 -3.371368408203120115e+00 1.507180333137509987e-01 2.857142857142859760e-01 1.963458618164059999e+03 1.930460691452029920e+00 4.000000000000000000e+00 2.805092468261719887e+02 -9.125000000000000000e+01 5.325000000000000000e+01
3.400000000000000000e+01 7.164769230769229580e+02 2.420272674560550001e+02 -3.447845458984379885e+00 1.734083294868470071e-01 7.647058963775630325e-01 1.942397827148440001e+03 1.913836359977719948e+00 3.000000000000000000e+00 2.853598022460939774e+02 -9.075000000000000000e+01 5.325000000000000000e+01
6.500000000000000000e+01 6.999230769230770193e+02 2.343572692871090055e+02 -3.621856689453120115e+00 1.658741533756259989e-01 3.529411852359770063e-01 1.898739501953119998e+03 1.925303339958190030e+00 4.000000000000000000e+00 2.605407714843750000e+02 -8.975000000000000000e+01 5.325000000000000000e+01
2.800000000000000000e+01 6.921923076923079634e+02 2.317482452392580115e+02 -3.859008789062500000e+00 2.013199627399439862e-01 5.882353186607359730e-01 1.850470336914059999e+03 1.914539813995359996e+00 3.000000000000000000e+00 2.490290527343750000e+02 -8.875000000000000000e+01 5.325000000000000000e+01
4.400000000000000000e+01 6.552538461538459842e+02 2.626879882812500000e+02 -4.130706787109380329e+00 2.003007531166079991e-01 1.428571428571429880e-01 1.789420776367190001e+03 1.895275712013239966e+00 3.000000000000000000e+00 1.805821228027340055e+02 -8.725000000000000000e+01 5.325000000000000000e+01
1.900000000000000000e+01 6.516538461538459615e+02 2.705459289550780113e+02 -4.201293945312500000e+00 2.102406024932859940e-01 8.571428571428570120e-02 1.771774169921880002e+03 1.877402305603030008e+00 1.000000000000000000e+00 1.670778808593750000e+02 -8.675000000000000000e+01 5.325000000000000000e+01
8.000000000000000000e+00 6.391692307692310351e+02 2.694108581542969887e+02 -4.271850585937500000e+00 2.099648863077160088e-01 5.714285714285709944e-02 1.754127685546880002e+03 1.856103897094729893e+00 1.000000000000000000e+00 1.409779663085940058e+02 -8.625000000000000000e+01 5.325000000000000000e+01
2.700000000000000000e+01 6.289615384615379980e+02 2.668523559570310226e+02 -4.207641601562500000e+00 2.135815173387529964e-01 0.000000000000000000e+00 1.751591430664059999e+03 1.840268492698670100e+00 3.000000000000000000e+00 1.217113189697270030e+02 -8.575000000000000000e+01 5.325000000000000000e+01
1.600000000000000000e+01 6.194538461538460297e+02 2.638179931640619884e+02 -4.143402099609380329e+00 2.213387191295619894e-01 1.714285714285710138e-01 1.749055175781250000e+03 1.752151250839230068e+00 1.000000000000000000e+00 1.140221328735349999e+02 -8.525000000000000000e+01 5.325000000000000000e+01
1.500000000000000000e+01 6.095000000000000000e+02 2.629344177246089771e+02 -4.079193115234380329e+00 2.317182719707490124e-01 1.428571428571429880e-01 1.746519042968750000e+03 1.817404866218570003e+00 1.000000000000000000e+00 1.092278289794920028e+02 -8.475000000000000000e+01 5.325000000000000000e+01
2.300000000000000000e+01 5.938846153846160405e+02 2.632060852050780113e+02 -3.986175537109379885e+00 2.283959537744519874e-01 5.294117927551269531e-01 1.746767822265619998e+03 1.813731074333190030e+00 3.000000000000000000e+00 1.181062011718750000e+02 -8.425000000000000000e+01 5.325000000000000000e+01
1.900000000000000000e+01 5.830230769230770420e+02 2.749636840820310226e+02 -3.806793212890620115e+00 2.192522138357159978e-01 1.428571428571429880e-01 1.755371582031250000e+03 1.802699327468870072e+00 1.000000000000000000e+00 8.047300720214839487e+01 -8.375000000000000000e+01 5.325000000000000000e+01
2.300000000000000000e+01 5.735769230769229807e+02 2.914974975585939774e+02 -3.627410888671879885e+00 2.261675596237180119e-01 1.142857142857140046e-01 1.763975341796880002e+03 1.792220592498779963e+00 3.000000000000000000e+00 6.600099182128910513e+01 -8.325000000000000000e+01 5.325000000000000000e+01
2.800000000000000000e+01 5.590923076923070312e+02 3.051062622070310226e+02 -3.448028564453120115e+00 2.036116719245910089e-01 5.714285714285709944e-02 1.772579101562500000e+03 1.795553088188170054e+00 3.000000000000000000e+00 3.398936080932620030e+01 -8.275000000000000000e+01 5.325000000000000000e+01
1.900000000000000000e+01 6.746230769230769511e+02 3.849951782226560226e+02 -3.327209472656250000e+00 2.453102618455889894e-01 2.941176593303679865e-01 1.732989135742190001e+03 1.022059440612790082e+00 1.000000000000000000e+00 1.156008605957029971e+02 -7.825000000000000000e+01 5.325000000000000000e+01
3.100000000000000000e+01 7.025000000000000000e+02 3.870953979492189774e+02 -3.573028564453120115e+00 2.723836302757259853e-01 5.882353186607359730e-01 1.697562133789059999e+03 6.982901692390439674e-01 3.000000000000000000e+00 1.709339904785159945e+02 -7.775000000000000000e+01 5.325000000000000000e+01
2.500000000000000000e+01 7.167384615384620474e+02 3.879168090820310226e+02 -3.818847656250000000e+00 2.937584221363069847e-01 1.428571428571429880e-01 1.662135131835940001e+03 6.941826343536380284e-01 3.000000000000000000e+00 2.129518890380859943e+02 -7.725000000000000000e+01 5.325000000000000000e+01
2.600000000000000000e+01 7.305769230769240039e+02 3.878283691406250000e+02 -4.062896728515619671e+00 2.764231562614439808e-01 1.714285714285710138e-01 1.627565673828119998e+03 6.902059912681579590e-01 3.000000000000000000e+00 1.884621582031250000e+02 -7.675000000000000000e+01 5.325000000000000000e+01
2.000000000000000000e+01 7.371000000000000227e+02 3.854174194335939774e+02 -4.301605224609380329e+00 2.898727059364319958e-01 2.571428571428570065e-01 1.595568725585940001e+03 6.884635686874389648e-01 3.000000000000000000e+00 2.307463989257809942e+02 -7.625000000000000000e+01 5.325000000000000000e+01
1.700000000000000000e+01 7.426538461538459615e+02 3.818313903808589771e+02 -4.540313720703119671e+00 2.972530126571660269e-01 5.714285714285709944e-02 1.563571655273440001e+03 6.868922710418700062e-01 1.000000000000000000e+00 2.635260009765619884e+02 -7.575000000000000000e+01 5.325000000000000000e+01
3.600000000000000000e+01 7.795615384615390440e+02 3.770758972167969887e+02 -5.035156250000000000e+00 3.807469904422760010e-01 5.882353186607359730e-01 1.482958984375000000e+03 6.730504631996150344e-01 3.000000000000000000e+00 3.942628479003910229e+02 -7.425000000000000000e+01 5.325000000000000000e+01
3.400000000000000000e+01 7.832538461538459842e+02 3.831689453125000000e+02 -5.126312255859380329e+00 4.209083616733549915e-01 3.529411852359770063e-01 1.461214233398440001e+03 6.720018386840820312e-01 3.000000000000000000e+00 4.429633789062500000e+02 -7.375000000000000000e+01 5.325000000000000000e+01
2.900000000000000000e+01 7.911769230769230035e+02 3.895017089843750000e+02 -5.217498779296880329e+00 3.786080181598659999e-01 8.823529481887819603e-01 1.439469360351559999e+03 6.686392426490780361e-01 3.000000000000000000e+00 4.351137390136719887e+02 -7.325000000000000000e+01 5.325000000000000000e+01
2.200000000000000000e+01 8.076461538461539931e+02 3.925545654296880116e+02 -5.208221435546880329e+00 4.120880961418150190e-01 6.470588445663449928e-01 1.422283325195309999e+03 6.634044647216800206e-01 3.000000000000000000e+00 4.853113708496089771e+02 -7.275000000000000000e+01 5.325000000000000000e+01
2.000000000000000000e+01 8.368538461538460069e+02 3.961760559082030113e+02 -5.165435791015619671e+00 5.005576610565189988e-01 5.882353186607359730e-01 1.406616943359380002e+03 8.568756580352779872e-01 3.000000000000000000e+00 5.591976318359379547e+02 -7.225000000000000000e+01 5.325000000000000000e+01
1.400000000000000000e+01 8.610076923076919684e+02 3.997536926269530113e+02 -5.122680664062500000e+00 4.640001356601720084e-01 2.941176593303679865e-01 1.390950439453119998e+03 1.167499184608459917e+00 1.000000000000000000e+00 5.223389892578120453e+02 -7.175000000000000000e+01 5.325000000000000000e+01
1.000000000000000000e+01 8.881076923076930143e+02 4.002487487792969887e+02 -5.079895019531250000e+00 5.087499022483830124e-01 5.882353186607359730e-01 1.375284057617190001e+03 1.234942555427549937e+00 1.000000000000000000e+00 5.364581909179689774e+02 -7.125000000000000000e+01 5.325000000000000000e+01
2.900000000000000000e+01 8.877384615384620474e+02 4.045847778320310226e+02 -5.071899414062500000e+00 4.439852535724639893e-01 6.470588445663449928e-01 1.363616943359380002e+03 1.293349504470830080e+00 3.000000000000000000e+00 5.481809082031250000e+02 -7.075000000000000000e+01 5.325000000000000000e+01
1.900000000000000000e+01 9.212615384615389758e+02 4.766853942871089771e+02 -5.349548339843750000e+00 4.552588164806369853e-01 0.000000000000000000e+00 1.297655151367190001e+03 1.267585873603819913e+00 1.000000000000000000e+00 6.612443237304689774e+02 -6.775000000000000000e+01 5.325000000000000000e+01
2.800000000000000000e+01 9.083461538461540385e+02 4.773371582031250000e+02 -5.437469482421880329e+00 4.778791069984439921e-01 0.000000000000000000e+00 1.291192382812500000e+03 1.280468940734859951e+00 3.000000000000000000e+00 6.098084716796879547e+02 -6.725000000000000000e+01 5.325000000000000000e+01
1.500000000000000000e+01 8.860461538461539703e+02 4.776923828125000000e+02 -5.521118164062500000e+00 4.055752456188200239e-01 0.000000000000000000e+00 1.288690551757809999e+03 1.295196294784549895e+00 1.000000000000000000e+00 5.787210693359379547e+02 -6.675000000000000000e+01 5.325000000000000000e+01
2.700000000000000000e+01 8.495538461538460524e+02 4.747892456054689774e+02 -5.604736328125000000e+00 3.748197853565219950e-01 0.000000000000000000e+00 1.286188842773440001e+03 1.301111102104189898e+00 3.000000000000000000e+00 5.304384765625000000e+02 -6.625000000000000000e+01 5.325000000000000000e+01
2.900000000000000000e+01 8.505846153846159723e+02 4.412506408691410229e+02 -5.661163330078119671e+00 5.131911635398860305e-01 0.000000000000000000e+00 1.289375244140619998e+03 1.295114874839780050e+00 3.000000000000000000e+00 6.244659423828120453e+02 -6.525000000000000000e+01 5.325000000000000000e+01
4.000000000000000000e+01 8.755923076923080544e+02 4.133798522949219887e+02 -5.597045898437500000e+00 3.790163695812229783e-01 0.000000000000000000e+00 1.297793457031250000e+03 1.301952004432679999e+00 3.000000000000000000e+00 4.982647094726560226e+02 -6.475000000000000000e+01 5.325000000000000000e+01
4.500000000000000000e+01 9.040538461538460524e+02 3.899581604003910229e+02 -5.532897949218750000e+00 3.562097549438479893e-01 0.000000000000000000e+00 1.306211547851559999e+03 1.433759927749630014e+00 4.000000000000000000e+00 4.988752136230469887e+02 -6.425000000000000000e+01 5.325000000000000000e+01
4.700000000000000000e+01 9.164153846153850509e+02 3.790404052734380116e+02 -5.191833496093750000e+00 2.710934579372409892e-01 0.000000000000000000e+00 1.331790649414059999e+03 1.619050979614260033e+00 4.000000000000000000e+00 3.474044799804689774e+02 -6.325000000000000000e+01 5.325000000000000000e+01
5.300000000000000000e+01 9.420923076923080544e+02 3.938801879882810226e+02 -4.914855957031250000e+00 3.288998901844020217e-01 0.000000000000000000e+00 1.348951538085940001e+03 1.505182743072509988e+00 4.000000000000000000e+00 4.313728332519530113e+02 -6.275000000000000000e+01 5.325000000000000000e+01
3.800000000000000000e+01 9.721000000000000227e+02 4.896927490234380116e+02 -3.896697998046879885e+00 2.190895080566410136e-01 5.294117927551269531e-01 1.398368286132809999e+03 1.668683290481570047e+00 3.000000000000000000e+00 4.190651245117189774e+02 -6.125000000000000000e+01 5.325000000000000000e+01
5.500000000000000000e+01 1.054130769230770056e+03 5.164175415039060226e+02 -2.626739501953120115e+00 1.773328036069869995e-01 0.000000000000000000e+00 1.443007080078119998e+03 1.235031008720399948e+00 4.000000000000000000e+00 4.746421203613280113e+02 -5.975000000000000000e+01 5.325000000000000000e+01
4.000000000000000000e+01 1.146369230769229944e+03 5.392594604492189774e+02 -1.815032958984380107e+00 1.723193824291230081e-01 0.000000000000000000e+00 1.466481445312500000e+03 1.489190340042110039e+00 3.000000000000000000e+00 4.635406188964839771e+02 -5.875000000000000000e+01 5.325000000000000000e+01
5.000000000000000000e+01 1.141030769230769920e+03 5.542840576171879547e+02 -1.409179687500000000e+00 1.092674583196640015e-01 0.000000000000000000e+00 1.478218627929690001e+03 1.379018187522889960e+00 4.000000000000000000e+00 3.130515747070310226e+02 -5.825000000000000000e+01 5.325000000000000000e+01
2.100000000000000000e+01 1.118661538461539976e+03 5.634777221679689774e+02 -1.080322265625000000e+00 9.999999776482580358e-03 0.000000000000000000e+00 1.456015502929690001e+03 1.300138235092159977e+00 3.000000000000000000e+00 1.431709442138669885e+02 -5.775000000000000000e+01 5.325000000000000000e+01
4.700000000000000000e+01 1.140469230769230080e+03 5.603167724609379547e+02 -7.771301269531250000e-01 9.999999776482580358e-03 0.000000000000000000e+00 1.422499023437500000e+03 8.451565504074100010e-01 4.000000000000000000e+00 2.891454467773439774e+02 -5.725000000000000000e+01 5.325000000000000000e+01
5.800000000000000000e+01 1.135253846153849963e+03 5.473773803710939774e+02 -4.739379882812500000e-01 9.999999776482580358e-03 0.000000000000000000e+00 1.388982543945309999e+03 6.168093681335450329e-01 4.000000000000000000e+00 1.702579040527340055e+02 -5.675000000000000000e+01 5.325000000000000000e+01
4.900000000000000000e+01 1.098192307692309896e+03 5.251268920898439774e+02 -1.707458496093750000e-01 9.999999776482580358e-03 0.000000000000000000e+00 1.355466064453119998e+03 6.190457344055180222e-01 4.000000000000000000e+00 7.643042755126950283e+01 -5.625000000000000000e+01 5.325000000000000000e+01
3.800000000000000000e+01 5.771538461538459615e+02 2.313519134521480112e+02 -2.579620361328120115e+00 9.999999776482580358e-03 3.142857142857140018e-01 2.182115234375000000e+03 1.955693721771240012e+00 3.000000000000000000e+00 2.479501190185550001e+02 -9.675000000000000000e+01 5.375000000000000000e+01
3.900000000000000000e+01 5.916692307692310351e+02 2.442601318359380116e+02 -2.807067871093750000e+00 9.999999776482580358e-03 4.857142857142859871e-01 2.151692138671880002e+03 1.942833065986629970e+00 3.000000000000000000e+00 2.593195190429689774e+02 -9.625000000000000000e+01 5.375000000000000000e+01
4.000000000000000000e+01 6.075846153846149491e+02 2.707598266601560226e+02 -3.034515380859379885e+00 9.999999776482580358e-03 7.647058963775630325e-01 2.121268798828119998e+03 1.588168978691099964e+00 3.000000000000000000e+00 2.621351318359380116e+02 -9.575000000000000000e+01 5.375000000000000000e+01
4.500000000000000000e+01 6.209384615384609560e+02 2.942345581054689774e+02 -3.178924560546879885e+00 1.096363291144370061e-01 8.235294222831730515e-01 2.092010009765619998e+03 1.433221101760860039e+00 4.000000000000000000e+00 2.690286254882810226e+02 -9.525000000000000000e+01 5.375000000000000000e+01
3.200000000000000000e+01 6.502923076923079861e+02 3.114085083007810226e+02 -3.529205322265620115e+00 1.361309885978700118e-01 8.823529481887819603e-01 2.005398071289059999e+03 1.964309573173520063e+00 3.000000000000000000e+00 2.362146606445309942e+02 -9.375000000000000000e+01 5.375000000000000000e+01
3.000000000000000000e+01 6.635692307692310123e+02 3.081683959960939774e+02 -3.566925048828120115e+00 1.498841643333440055e-01 1.058823585510249909e+00 1.986517578125000000e+03 1.951196908950810105e+00 3.000000000000000000e+00 2.604637451171880116e+02 -9.325000000000000000e+01 5.375000000000000000e+01
4.000000000000000000e+01 6.727000000000009550e+02 2.943747863769530113e+02 -3.604675292968750000e+00 1.644881367683410089e-01 5.294117927551269531e-01 1.967636962890619998e+03 1.485730528831479935e+00 3.000000000000000000e+00 2.696977539062500000e+02 -9.275000000000000000e+01 5.375000000000000000e+01
4.800000000000000000e+01 6.800076923076919684e+02 2.725176391601560226e+02 -3.642395019531250000e+00 1.684614568948749891e-01 2.352941185235979948e-01 1.948756469726559999e+03 7.941834926605220168e-01 4.000000000000000000e+00 2.481059875488280113e+02 -9.225000000000000000e+01 5.375000000000000000e+01
4.200000000000000000e+01 6.903230769230769965e+02 2.333312988281250000e+02 -3.741516113281250000e+00 2.104342579841609884e-01 5.294117927551269531e-01 1.909111694335940001e+03 1.889971017837519973e+00 3.000000000000000000e+00 2.624577636718750000e+02 -9.125000000000000000e+01 5.375000000000000000e+01
4.800000000000000000e+01 6.881307692307690331e+02 2.302144622802730112e+02 -3.798156738281250000e+00 2.142007946968080001e-01 2.941176593303679865e-01 1.888724243164059999e+03 1.873269438743589976e+00 4.000000000000000000e+00 2.308982391357419885e+02 -9.075000000000000000e+01 5.375000000000000000e+01
4.700000000000000000e+01 6.616615384615380435e+02 1.985491180419919885e+02 -4.051544189453119671e+00 2.194759547710420089e-01 2.857142857142859760e-01 1.818286621093750000e+03 1.888270139694210092e+00 4.000000000000000000e+00 2.083670043945309942e+02 -8.925000000000000000e+01 5.375000000000000000e+01
4.200000000000000000e+01 6.673846153846150173e+02 2.019547271728519888e+02 -4.163848876953119671e+00 2.458620965480800002e-01 1.764705926179890028e-01 1.791715698242190001e+03 1.877685070037840021e+00 3.000000000000000000e+00 2.018535614013669885e+02 -8.875000000000000000e+01 5.375000000000000000e+01
7.000000000000000000e+00 6.450000000000000000e+02 2.205868072509769888e+02 -4.360290527343750000e+00 2.404844611883160121e-01 1.428571428571429880e-01 1.742286987304690001e+03 1.861212730407709959e+00 1.000000000000000000e+00 1.504816436767580115e+02 -8.775000000000000000e+01 5.375000000000000000e+01
3.100000000000000000e+01 6.361230769230769511e+02 2.370370941162109943e+02 -4.435089111328119671e+00 2.369225025177000010e-01 2.857142857142859829e-02 1.720667114257809999e+03 1.852071642875670054e+00 3.000000000000000000e+00 1.313624725341800001e+02 -8.725000000000000000e+01 5.375000000000000000e+01
3.100000000000000000e+01 6.309461538461539476e+02 2.549205627441409945e+02 -4.509857177734380329e+00 2.523824572563170276e-01 0.000000000000000000e+00 1.699047119140619998e+03 1.834196925163269931e+00 3.000000000000000000e+00 1.261088714599609943e+02 -8.675000000000000000e+01 5.375000000000000000e+01
2.000000000000000000e+01 6.197692307692300346e+02 2.542100219726559942e+02 -4.584655761718750000e+00 2.731825113296509899e-01 0.000000000000000000e+00 1.677427124023440001e+03 1.816125988960270110e+00 3.000000000000000000e+00 1.251497039794920028e+02 -8.625000000000000000e+01 5.375000000000000000e+01
1.500000000000000000e+01 6.043307692307689649e+02 2.517203369140619884e+02 -4.475128173828119671e+00 2.884766161441800203e-01 0.000000000000000000e+00 1.664246215820309999e+03 1.790818333625789904e+00 1.000000000000000000e+00 1.005793380737299998e+02 -8.525000000000000000e+01 5.375000000000000000e+01
1.900000000000000000e+01 5.945769230769229807e+02 2.487057952880859943e+02 -4.420379638671880329e+00 2.945746779441830165e-01 8.823529481887819603e-01 1.657655639648440001e+03 1.779984712600710006e+00 1.000000000000000000e+00 9.806320190429690342e+01 -8.475000000000000000e+01 5.375000000000000000e+01
1.600000000000000000e+01 5.822769230769230262e+02 2.458327331542969887e+02 -4.339355468750000000e+00 2.934165596961980094e-01 8.571428571428570120e-02 1.654071289062500000e+03 1.769924521446230026e+00 1.000000000000000000e+00 9.957243347167970171e+01 -8.425000000000000000e+01 5.375000000000000000e+01
1.500000000000000000e+01 5.720076923076919684e+02 2.506355895996090055e+02 -4.179534912109380329e+00 2.925117015838620271e-01 1.142857142857140046e-01 1.659505371093750000e+03 1.757073163986210051e+00 1.000000000000000000e+00 9.218434143066410513e+01 -8.375000000000000000e+01 5.375000000000000000e+01
1.600000000000000000e+01 5.609769230769229580e+02 2.648627624511719887e+02 -4.019683837890619671e+00 2.934691011905670166e-01 2.941176593303679865e-01 1.664939453125000000e+03 1.746943473815919967e+00 1.000000000000000000e+00 7.235140991210940342e+01 -8.325000000000000000e+01 5.375000000000000000e+01
1.400000000000000000e+01 5.436538461538459615e+02 2.802610473632810226e+02 -3.859832763671879885e+00 2.707082033157349743e-01 2.857142857142859829e-02 1.670373535156250000e+03 1.751308202743530051e+00 1.000000000000000000e+00 4.363236618041990056e+01 -8.275000000000000000e+01 5.375000000000000000e+01
1.700000000000000000e+01 6.634384615384609560e+02 3.864309387207030113e+02 -3.718536376953120115e+00 2.850493788719180022e-01 2.941176593303679865e-01 1.640227050781250000e+03 1.383021473884580077e+00 1.000000000000000000e+00 6.589205932617190342e+01 -7.825000000000000000e+01 5.375000000000000000e+01
3.400000000000000000e+01 7.253153846153840050e+02 3.843352966308589771e+02 -4.610809326171880329e+00 3.194294273853299782e-01 5.714285714285709944e-02 1.527248168945309999e+03 7.788778543472290039e-01 3.000000000000000000e+00 1.874211120605469887e+02 -7.625000000000000000e+01 5.375000000000000000e+01
1.800000000000000000e+01 7.861692307692310351e+02 3.889653015136719887e+02 -5.427429199218750000e+00 4.475109279155730091e-01 2.000000000000000111e-01 1.379242919921880002e+03 7.159720659255980335e-01 1.000000000000000000e+00 4.024974365234380116e+02 -7.275000000000000000e+01 5.375000000000000000e+01
2.800000000000000000e+01 8.552076923076930370e+02 4.007478637695310226e+02 -5.315704345703119671e+00 5.088587999343869850e-01 2.941176593303679865e-01 1.321137451171880002e+03 1.270566821098330079e+00 3.000000000000000000e+00 5.450089721679689774e+02 -7.075000000000000000e+01 5.375000000000000000e+01
1.300000000000000000e+01 8.607076923076930370e+02 4.460477600097660229e+02 -5.329864501953119671e+00 4.548865258693700064e-01 6.470588445663449928e-01 1.295079956054690001e+03 1.306883811950680041e+00 1.000000000000000000e+00 5.663750000000000000e+02 -6.975000000000000000e+01 5.375000000000000000e+01
2.600000000000000000e+01 8.684923076923080316e+02 4.640419311523439774e+02 -5.470123291015619671e+00 4.419907033443449818e-01 0.000000000000000000e+00 1.270849365234380002e+03 1.288715124130249912e+00 3.000000000000000000e+00 5.555601806640620453e+02 -6.875000000000000000e+01 5.375000000000000000e+01
3.800000000000000000e+01 9.386461538461539931e+02 4.655053100585939774e+02 -5.578094482421880329e+00 5.513480305671689674e-01 0.000000000000000000e+00 1.259281982421880002e+03 1.241267800331119942e+00 3.000000000000000000e+00 5.872821044921879547e+02 -6.825000000000000000e+01 5.375000000000000000e+01
2.000000000000000000e+01 8.689153846153850509e+02 4.674866027832030113e+02 -5.786041259765619671e+00 5.241319537162779651e-01 0.000000000000000000e+00 1.240408813476559999e+03 1.271195292472840022e+00 3.000000000000000000e+00 6.256788940429689774e+02 -6.725000000000000000e+01 5.375000000000000000e+01
3.200000000000000000e+01 8.679230769230770193e+02 4.671213073730469887e+02 -5.878051757812500000e+00 4.742039442062380150e-01 0.000000000000000000e+00 1.237364379882809999e+03 1.269914865493769973e+00 3.000000000000000000e+00 6.301507568359379547e+02 -6.675000000000000000e+01 5.375000000000000000e+01
2.200000000000000000e+01 8.459769230769229580e+02 4.643175048828119884e+02 -5.970092773437500000e+00 4.197277128696439985e-01 0.000000000000000000e+00 1.234319946289059999e+03 1.272323250770569958e+00 3.000000000000000000e+00 5.054393005371089771e+02 -6.625000000000000000e+01 5.375000000000000000e+01
2.900000000000000000e+01 8.335076923076919684e+02 4.524088134765619884e+02 -6.062103271484380329e+00 4.238702952861789774e-01 0.000000000000000000e+00 1.231275512695309999e+03 1.280392527580259898e+00 3.000000000000000000e+00 4.933794250488280113e+02 -6.575000000000000000e+01 5.375000000000000000e+01
2.300000000000000000e+01 9.021000000000000227e+02 3.960764770507810226e+02 -5.888885498046880329e+00 4.331018328666689787e-01 5.294117927551269531e-01 1.252712402343750000e+03 1.301960945129390090e+00 3.000000000000000000e+00 5.188482055664060226e+02 -6.425000000000000000e+01 5.375000000000000000e+01
3.000000000000000000e+01 9.246307692307700563e+02 3.891031494140619884e+02 -5.511138916015619671e+00 4.103499650955200195e-01 0.000000000000000000e+00 1.278864135742190001e+03 1.008834242820739968e+00 3.000000000000000000e+00 5.106763610839839771e+02 -6.325000000000000000e+01 5.375000000000000000e+01
1.400000000000000000e+01 9.647692307692300346e+02 4.318948974609380116e+02 -4.898376464843750000e+00 4.993884861469269909e-01 0.000000000000000000e+00 1.315023681640619998e+03 1.234178900718690075e+00 1.000000000000000000e+00 6.184483642578120453e+02 -6.225000000000000000e+01 5.375000000000000000e+01
3.500000000000000000e+01 9.473230769230769965e+02 4.893586120605469887e+02 -4.098724365234380329e+00 2.293546348810200086e-01 3.529411852359770063e-01 1.346900024414059999e+03 1.623230576515199974e+00 3.000000000000000000e+00 3.412601013183589771e+02 -6.125000000000000000e+01 5.375000000000000000e+01
6.700000000000000000e+01 9.537692307692300346e+02 5.010015563964839771e+02 -3.642822265625000000e+00 9.999999776482580358e-03 1.176470592617989974e-01 1.361553344726559999e+03 1.668016076087950106e+00 4.000000000000000000e+00 7.714456939697269888e+01 -6.075000000000000000e+01 5.375000000000000000e+01
1.100000000000000000e+01 1.084892307692309942e+03 5.463901977539060226e+02 -1.858245849609380107e+00 2.107421159744259920e-01 0.000000000000000000e+00 1.417902221679690001e+03 1.438909769058229982e+00 1.000000000000000000e+00 6.472888183593750000e+02 -5.875000000000000000e+01 5.375000000000000000e+01
2.000000000000000000e+01 1.105261538461540113e+03 5.669224853515620453e+02 -1.417938232421880107e+00 1.438199579715729870e-01 0.000000000000000000e+00 1.431649902343750000e+03 1.091006398200990102e+00 3.000000000000000000e+00 3.362295837402339771e+02 -5.825000000000000000e+01 5.375000000000000000e+01
5.600000000000000000e+01 1.105769230769230035e+03 5.785851440429689774e+02 -1.081817626953119893e+00 9.999999776482580358e-03 0.000000000000000000e+00 1.396470581054690001e+03 1.450048685073850097e+00 4.000000000000000000e+00 2.019593811035159945e+02 -5.775000000000000000e+01 5.375000000000000000e+01
2.700000000000000000e+01 4.975000000000000000e+02 2.602960205078119884e+02 -2.139709472656250000e+00 9.999999776482580358e-03 8.571428571428570120e-02 2.212203369140619998e+03 2.916991710662840021e+00 3.000000000000000000e+00 2.438747100830080115e+02 -9.925000000000000000e+01 5.425000000000000000e+01
2.400000000000000000e+01 4.904384615384619792e+02 2.791012268066410229e+02 -2.341156005859379885e+00 9.999999776482580358e-03 5.714285714285709944e-02 2.189585693359380002e+03 2.009690284728999909e+00 3.000000000000000000e+00 2.128028411865230112e+02 -9.875000000000000000e+01 5.425000000000000000e+01
4.300000000000000000e+01 5.359153846153850509e+02 2.835663452148439774e+02 -2.952941894531250000e+00 9.999999776482580358e-03 8.571428571428570120e-02 2.120664062500000000e+03 1.988507866859440032e+00 3.000000000000000000e+00 2.268510742187500000e+02 -9.725000000000000000e+01 5.425000000000000000e+01
5.600000000000000000e+01 6.076615384615389530e+02 3.036437377929689774e+02 -3.730407714843750000e+00 1.500986218452450005e-01 1.428571428571429880e-01 2.019473510742190001e+03 1.953529000282290040e+00 4.000000000000000000e+00 2.213763275146480112e+02 -9.525000000000000000e+01 5.425000000000000000e+01
5.700000000000000000e+01 6.226769230769230035e+02 3.120452270507810226e+02 -3.928070068359379885e+00 1.611425578594209984e-01 2.857142857142859760e-01 1.964178222656250000e+03 1.955191969871520108e+00 4.000000000000000000e+00 2.332243194580080115e+02 -9.425000000000000000e+01 5.425000000000000000e+01
4.200000000000000000e+01 6.341076923076919911e+02 3.129905395507810226e+02 -4.026885986328119671e+00 1.847496181726460129e-01 4.000000000000000222e-01 1.936530517578119998e+03 1.935883164405820089e+00 3.000000000000000000e+00 2.205719451904300001e+02 -9.375000000000000000e+01 5.425000000000000000e+01
3.900000000000000000e+01 6.511538461538459615e+02 2.922955932617189774e+02 -4.047576904296880329e+00 2.137682884931559890e-01 2.352941185235979948e-01 1.906064941406250000e+03 1.899713516235350008e+00 3.000000000000000000e+00 2.230618286132809942e+02 -9.275000000000000000e+01 5.425000000000000000e+01
4.100000000000000000e+01 6.509153846153840277e+02 2.674617004394530113e+02 -4.057891845703119671e+00 2.446538060903550027e-01 8.235294222831730515e-01 1.890832153320309999e+03 1.893517613410949929e+00 3.000000000000000000e+00 2.538791046142580115e+02 -9.225000000000000000e+01 5.425000000000000000e+01
4.500000000000000000e+01 6.527153846153850054e+02 2.422962493896480112e+02 -4.074859619140619671e+00 2.353033274412159870e-01 3.142857142857140018e-01 1.874479003906250000e+03 1.889263987541200063e+00 4.000000000000000000e+00 2.282294158935550001e+02 -9.175000000000000000e+01 5.425000000000000000e+01
2.400000000000000000e+01 6.507769230769230262e+02 2.114710693359380116e+02 -4.148468017578119671e+00 2.595403492450710226e-01 4.000000000000000222e-01 1.835050659179690001e+03 1.866635084152219903e+00 3.000000000000000000e+00 2.128008422851559942e+02 -9.075000000000000000e+01 5.425000000000000000e+01
3.700000000000000000e+01 6.401461538461539931e+02 1.835508728027340055e+02 -4.256683349609380329e+00 2.657667696475979890e-01 2.941176593303679865e-01 1.790975708007809999e+03 1.839083194732670012e+00 3.000000000000000000e+00 1.707697601318359943e+02 -8.975000000000000000e+01 5.425000000000000000e+01
1.900000000000000000e+01 6.412846153846149946e+02 1.807470703125000000e+02 -4.362701416015619671e+00 2.717904746532440186e-01 2.000000000000000111e-01 1.761968261718750000e+03 1.830848693847660025e+00 1.000000000000000000e+00 1.511853485107419885e+02 -8.925000000000000000e+01 5.425000000000000000e+01
1.200000000000000000e+01 6.380076923076919684e+02 1.855323791503909945e+02 -4.468688964843750000e+00 2.774412333965299848e-01 1.142857142857140046e-01 1.732960937500000000e+03 1.822305679321289951e+00 1.000000000000000000e+00 1.393016510009769888e+02 -8.875000000000000000e+01 5.425000000000000000e+01
1.700000000000000000e+01 6.377384615384620474e+02 1.923862304687500000e+02 -4.574707031250000000e+00 2.905720472335819871e-01 2.941176593303679865e-01 1.703953613281250000e+03 1.817567944526669921e+00 1.000000000000000000e+00 1.357100982666019888e+02 -8.825000000000000000e+01 5.425000000000000000e+01
3.100000000000000000e+01 6.230538461538460524e+02 2.026292877197269888e+02 -4.660430908203119671e+00 3.058215975761410244e-01 2.857142857142859829e-02 1.677506713867190001e+03 1.816636919975280096e+00 3.000000000000000000e+00 1.466175079345699999e+02 -8.775000000000000000e+01 5.425000000000000000e+01
2.200000000000000000e+01 6.138846153846150173e+02 2.162286987304690058e+02 -4.739440917968750000e+00 2.951112091541289728e-01 2.857142857142859829e-02 1.651913330078119998e+03 1.809648394584659981e+00 3.000000000000000000e+00 1.016369705200200002e+02 -8.725000000000000000e+01 5.425000000000000000e+01
2.700000000000000000e+01 6.011000000000000227e+02 2.383549346923830115e+02 -4.897430419921880329e+00 3.442011773586269863e-01 2.857142857142859829e-02 1.600726684570309999e+03 1.762316584587100055e+00 3.000000000000000000e+00 1.313892364501949999e+02 -8.625000000000000000e+01 5.425000000000000000e+01
3.000000000000000000e+01 5.884153846153850509e+02 2.396045532226559942e+02 -4.852142333984380329e+00 3.564947545528410200e-01 2.857142857142859829e-02 1.590081909179690001e+03 1.714799284935000001e+00 3.000000000000000000e+00 1.085509033203120026e+02 -8.575000000000000000e+01 5.425000000000000000e+01
9.000000000000000000e+00 5.784153846153840277e+02 2.404956054687500000e+02 -4.761596679687500000e+00 3.763749003410339911e-01 1.428571428571429880e-01 1.568792358398440001e+03 1.546361684799189895e+00 1.000000000000000000e+00 1.419202270507809942e+02 -8.475000000000000000e+01 5.425000000000000000e+01
1.400000000000000000e+01 5.503846153846150173e+02 2.439767608642580115e+02 -4.552246093750000000e+00 3.345608413219450239e-01 4.705882370471949905e-01 1.563639160156250000e+03 1.727923035621639958e+00 1.000000000000000000e+00 8.017884826660160513e+01 -8.375000000000000000e+01 5.425000000000000000e+01
2.200000000000000000e+01 5.425000000000000000e+02 2.608096618652339771e+02 -4.411956787109380329e+00 3.334086239337920032e-01 0.000000000000000000e+00 1.565903564453119998e+03 1.712824702262879972e+00 3.000000000000000000e+00 5.259692764282230115e+01 -8.325000000000000000e+01 5.425000000000000000e+01
2.200000000000000000e+01 5.370153846153840504e+02 2.768332519531250000e+02 -4.271667480468750000e+00 3.198998868465420253e-01 5.294117927551269531e-01 1.568167846679690001e+03 1.705320239067080079e+00 3.000000000000000000e+00 1.899999618530269885e+01 -8.275000000000000000e+01 5.425000000000000000e+01
1.900000000000000000e+01 6.330769230769229807e+02 3.814260253906250000e+02 -3.905883789062500000e+00 3.377016484737400126e-01 1.428571428571429880e-01 1.570005737304690001e+03 1.350113272666930042e+00 1.000000000000000000e+00 5.563983535766600141e+01 -7.875000000000000000e+01 5.425000000000000000e+01
6.000000000000000000e+00 6.654461538461539476e+02 3.836597595214839771e+02 -4.109893798828119671e+00 3.891343176364899792e-01 2.352941185235979948e-01 1.547465087890619998e+03 1.329379200935359995e+00 1.000000000000000000e+00 1.415182800292969887e+02 -7.825000000000000000e+01 5.425000000000000000e+01
2.300000000000000000e+01 7.194076923076929688e+02 3.818780822753910229e+02 -4.920013427734380329e+00 3.869039714336400260e-01 8.571428571428570120e-02 1.458927734375000000e+03 1.290428161621089975e+00 3.000000000000000000e+00 1.873245697021480112e+02 -7.625000000000000000e+01 5.425000000000000000e+01
2.300000000000000000e+01 7.396615384615389530e+02 3.774778747558589771e+02 -5.119384765625000000e+00 4.515029489994050182e-01 1.428571428571429880e-01 1.437687377929690001e+03 1.307563185691829943e+00 3.000000000000000000e+00 2.359928588867190058e+02 -7.575000000000000000e+01 5.425000000000000000e+01
1.100000000000000000e+01 7.317153846153850054e+02 3.754393310546880116e+02 -5.318725585937500000e+00 4.427691102027889736e-01 5.294117927551269531e-01 1.416447021484380002e+03 1.345215320587159979e+00 1.000000000000000000e+00 2.643240356445310226e+02 -7.525000000000000000e+01 5.425000000000000000e+01
1.800000000000000000e+01 7.391000000000000227e+02 3.724719543457030113e+02 -5.452484130859380329e+00 5.589933991432189941e-01 2.857142857142859829e-02 1.397982177734380002e+03 1.278072714805599919e+00 1.000000000000000000e+00 4.089580688476560226e+02 -7.475000000000000000e+01 5.425000000000000000e+01
3.100000000000000000e+01 7.665923076923070312e+02 3.750744323730469887e+02 -5.656951904296880329e+00 5.205299258232120030e-01 2.857142857142859829e-02 1.350913330078119998e+03 1.258222460746770022e+00 3.000000000000000000e+00 4.010698547363280113e+02 -7.325000000000000000e+01 5.425000000000000000e+01
2.100000000000000000e+01 7.851692307692300119e+02 3.876260070800780113e+02 -5.610229492187500000e+00 5.380623936653140538e-01 1.428571428571429880e-01 1.321817749023440001e+03 1.150875210762019929e+00 3.000000000000000000e+00 4.385557861328119884e+02 -7.225000000000000000e+01 5.425000000000000000e+01
1.900000000000000000e+01 8.020461538461529472e+02 3.912277832031250000e+02 -5.573822021484380329e+00 5.261896848678589977e-01 5.714285714285709944e-02 1.307432983398440001e+03 1.222773432731629972e+00 1.000000000000000000e+00 4.518924865722660229e+02 -7.175000000000000000e+01 5.425000000000000000e+01
2.100000000000000000e+01 7.865307692307690104e+02 3.956097412109380116e+02 -5.537384033203119671e+00 4.816577732563019909e-01 2.941176593303679865e-01 1.293048339843750000e+03 1.273140311241149902e+00 3.000000000000000000e+00 5.302327880859379547e+02 -7.125000000000000000e+01 5.425000000000000000e+01
4.200000000000000000e+01 8.440153846153849599e+02 4.477452697753910229e+02 -5.775085449218750000e+00 5.399773716926570266e-01 0.000000000000000000e+00 1.223195922851559999e+03 1.274653553962709962e+00 3.000000000000000000e+00 5.678230590820310226e+02 -6.875000000000000000e+01 5.425000000000000000e+01
1.700000000000000000e+01 8.480230769230770420e+02 4.505862121582030113e+02 -6.022521972656250000e+00 5.287954211235049717e-01 0.000000000000000000e+00 1.197774291992190001e+03 1.256821513175959915e+00 1.000000000000000000e+00 5.890216064453120453e+02 -6.775000000000000000e+01 5.425000000000000000e+01
1.000000000000000000e+01 8.389461538461539476e+02 4.513627319335939774e+02 -6.134613037109380329e+00 5.200415849685670056e-01 0.000000000000000000e+00 1.189625366210940001e+03 1.248768806457519975e+00 1.000000000000000000e+00 5.946597900390620453e+02 -6.725000000000000000e+01 5.425000000000000000e+01
2.100000000000000000e+01 8.449076923076919456e+02 4.517698364257810226e+02 -6.235015869140619671e+00 5.770110487937929467e-01 0.000000000000000000e+00 1.186038330078119998e+03 1.242289900779719902e+00 3.000000000000000000e+00 6.234536743164060226e+02 -6.675000000000000000e+01 5.425000000000000000e+01
2.000000000000000000e+01 8.953153846153840050e+02 4.020271301269530113e+02 -5.494659423828119671e+00 4.076239168643949751e-01 0.000000000000000000e+00 1.244936279296880002e+03 1.027272462844849965e+00 3.000000000000000000e+00 4.032789306640619884e+02 -6.275000000000000000e+01 5.425000000000000000e+01
2.100000000000000000e+01 9.144461538461530381e+02 4.544649658203119884e+02 -4.785705566406250000e+00 3.435651063919070158e-01 5.294117927551269531e-01 1.281633422851559999e+03 1.261479139328000043e+00 3.000000000000000000e+00 4.442466430664060226e+02 -6.175000000000000000e+01 5.425000000000000000e+01
1.600000000000000000e+01 9.099384615384609560e+02 4.785343322753910229e+02 -4.300750732421880329e+00 2.808122634887699753e-01 5.882352963089940157e-02 1.295431884765619998e+03 1.281738877296449974e+00 1.000000000000000000e+00 3.925525817871089771e+02 -6.125000000000000000e+01 5.425000000000000000e+01
3.000000000000000000e+01 9.413384615384619565e+02 4.971805419921880116e+02 -3.330780029296879885e+00 2.448061704635620117e-01 7.058823704719540126e-01 1.323028686523440001e+03 1.079971551895140047e+00 3.000000000000000000e+00 3.746789855957030113e+02 -6.025000000000000000e+01 5.425000000000000000e+01
1.100000000000000000e+01 9.564769230769229580e+02 5.065438232421880116e+02 -2.850921630859379885e+00 1.789642274379729947e-01 5.882352963089940157e-02 1.337807006835940001e+03 1.260449886322019930e+00 1.000000000000000000e+00 3.191972351074219887e+02 -5.975000000000000000e+01 5.425000000000000000e+01
2.900000000000000000e+01 9.791923076923079634e+02 5.234578247070310226e+02 -2.376190185546879885e+00 1.386990100145339966e-01 5.882352963089940157e-02 1.353565063476559999e+03 7.157692909240720436e-01 3.000000000000000000e+00 2.673082885742189774e+02 -5.925000000000000000e+01 5.425000000000000000e+01
6.800000000000000000e+01 4.965538461538459956e+02 2.557217864990230112e+02 -2.725311279296879885e+00 9.999999776482580358e-03 8.571428571428570120e-02 2.120430419921880002e+03 1.959447979927060102e+00 4.000000000000000000e+00 2.714523925781250000e+02 -9.975000000000000000e+01 5.475000000000000000e+01
5.100000000000000000e+01 4.999538461538459728e+02 2.722532348632810226e+02 -2.827972412109379885e+00 1.063503324985499987e-01 1.142857142857140046e-01 2.112399658203119998e+03 1.958368182182310013e+00 4.000000000000000000e+00 2.579449157714839771e+02 -9.925000000000000000e+01 5.475000000000000000e+01
5.200000000000000000e+01 4.961538461538460183e+02 2.869280090332030113e+02 -3.032775878906250000e+00 1.015820130705829966e-01 2.285714285714290084e-01 2.090017333984380002e+03 1.971893429756160110e+00 4.000000000000000000e+00 2.256657562255859943e+02 -9.875000000000000000e+01 5.475000000000000000e+01
4.500000000000000000e+01 4.935692307692310123e+02 2.913901977539060226e+02 -3.237579345703120115e+00 1.059533953666690065e-01 1.428571428571429880e-01 2.067635009765619998e+03 1.973253965377810060e+00 4.000000000000000000e+00 2.039223175048830115e+02 -9.825000000000000000e+01 5.475000000000000000e+01
4.500000000000000000e+01 5.103999999999999773e+02 2.915759582519530113e+02 -3.442413330078120115e+00 1.273780614137650091e-01 5.714285714285709944e-02 2.045252807617190001e+03 1.818712234497070090e+00 4.000000000000000000e+00 2.120570983886719887e+02 -9.775000000000000000e+01 5.475000000000000000e+01
3.500000000000000000e+01 5.762076923076920139e+02 2.873374938964839771e+02 -4.024780273437500000e+00 1.847945004701609939e-01 1.428571428571429880e-01 1.979108032226559999e+03 1.910489439964289993e+00 3.000000000000000000e+00 2.155627136230469887e+02 -9.625000000000000000e+01 5.475000000000000000e+01
5.300000000000000000e+01 5.994384615384619792e+02 3.026530761718750000e+02 -4.305847167968750000e+00 2.146117687225340132e-01 2.352941185235979948e-01 1.934240112304690001e+03 1.899930596351619982e+00 4.000000000000000000e+00 2.099505310058590055e+02 -9.525000000000000000e+01 5.475000000000000000e+01
3.800000000000000000e+01 6.275769230769229807e+02 2.904574584960939774e+02 -4.420227050781250000e+00 2.718761265277859773e-01 2.941176593303679865e-01 1.835693969726559999e+03 1.852625131607060105e+00 3.000000000000000000e+00 1.919013824462890057e+02 -9.275000000000000000e+01 5.475000000000000000e+01
3.000000000000000000e+01 6.282000000000000455e+02 2.650011596679689774e+02 -4.395202636718750000e+00 2.803284525871280186e-01 5.294117927551269531e-01 1.821203002929690001e+03 1.841087102890009986e+00 3.000000000000000000e+00 1.844600830078119884e+02 -9.225000000000000000e+01 5.475000000000000000e+01
2.700000000000000000e+01 6.297461538461540158e+02 2.356954345703119884e+02 -4.379974365234380329e+00 2.838465273380280096e-01 8.235294222831730515e-01 1.805160888671880002e+03 1.832625150680539994e+00 3.000000000000000000e+00 1.724613952636719887e+02 -9.175000000000000000e+01 5.475000000000000000e+01
2.300000000000000000e+01 6.292692307692309441e+02 2.143942108154300001e+02 -4.394165039062500000e+00 2.898061573505399946e-01 5.714285714285709944e-02 1.784464965820309999e+03 1.822839498519899903e+00 3.000000000000000000e+00 1.510532073974609943e+02 -9.125000000000000000e+01 5.475000000000000000e+01
4.800000000000000000e+01 6.240692307692310123e+02 2.014320068359380116e+02 -4.408325195312500000e+00 3.011333942413330078e-01 5.882352963089940157e-02 1.763769042968750000e+03 1.813128471374509942e+00 4.000000000000000000e+00 1.458970794677730112e+02 -9.075000000000000000e+01 5.475000000000000000e+01
2.800000000000000000e+01 6.189230769230770193e+02 1.920137176513669885e+02 -4.422485351562500000e+00 3.076564967632289815e-01 2.941176593303679865e-01 1.743073120117190001e+03 1.801219940185549984e+00 3.000000000000000000e+00 1.340041503906250000e+02 -9.025000000000000000e+01 5.475000000000000000e+01
1.300000000000000000e+01 6.157615384615379526e+02 1.864162139892580115e+02 -4.468780517578119671e+00 3.261632919311520107e-01 0.000000000000000000e+00 1.717286865234380002e+03 1.789377450942990055e+00 1.000000000000000000e+00 1.324907531738280113e+02 -8.975000000000000000e+01 5.475000000000000000e+01
1.300000000000000000e+01 6.131153846153849827e+02 1.836169128417969887e+02 -4.547210693359380329e+00 3.436642289161679908e-01 2.352941185235979948e-01 1.686410400390619998e+03 1.780080080032349965e+00 1.000000000000000000e+00 1.339027709960940058e+02 -8.925000000000000000e+01 5.475000000000000000e+01
6.000000000000000000e+00 6.144076923076919456e+02 1.852832031250000000e+02 -4.625640869140619671e+00 3.562365472316739723e-01 0.000000000000000000e+00 1.655533935546880002e+03 1.770111680030820089e+00 1.000000000000000000e+00 1.359491577148440058e+02 -8.875000000000000000e+01 5.475000000000000000e+01
1.100000000000000000e+01 6.048692307692309669e+02 1.930448913574219887e+02 -4.704071044921880329e+00 3.695424795150760167e-01 2.352941185235979948e-01 1.624657470703119998e+03 1.763800740241999954e+00 1.000000000000000000e+00 1.291354980468750000e+02 -8.825000000000000000e+01 5.475000000000000000e+01
3.000000000000000000e+01 6.002999999999999545e+02 2.069662628173830115e+02 -4.852905273437500000e+00 3.637406826019289885e-01 5.294117927551269531e-01 1.572074951171880002e+03 1.696590065956119942e+00 3.000000000000000000e+00 1.081794509887700002e+02 -8.775000000000000000e+01 5.475000000000000000e+01
2.600000000000000000e+01 5.915076923076929916e+02 2.195169982910159945e+02 -5.025207519531250000e+00 3.782308995723719924e-01 0.000000000000000000e+00 1.512257080078119998e+03 1.579684972763059969e+00 3.000000000000000000e+00 1.004575805664059942e+02 -8.725000000000000000e+01 5.475000000000000000e+01
1.500000000000000000e+01 5.814153846153850509e+02 2.318587646484380116e+02 -5.369812011718750000e+00 4.051214158534999776e-01 5.294117927551269531e-01 1.392621459960940001e+03 1.589738607406619986e+00 1.000000000000000000e+00 9.332744598388670454e+01 -8.625000000000000000e+01 5.475000000000000000e+01
1.100000000000000000e+01 5.588846153846150173e+02 2.345404663085940058e+02 -5.280700683593750000e+00 4.448732435703279808e-01 2.857142857142859829e-02 1.366782470703119998e+03 1.392198324203490101e+00 1.000000000000000000e+00 1.100313796997070028e+02 -8.475000000000000000e+01 5.475000000000000000e+01
1.900000000000000000e+01 5.492923076923079861e+02 2.389806518554690058e+02 -5.225860595703119671e+00 4.381286203861239903e-01 0.000000000000000000e+00 1.361501953125000000e+03 1.380286931991580035e+00 1.000000000000000000e+00 7.484780883789059658e+01 -8.425000000000000000e+01 5.475000000000000000e+01
1.600000000000000000e+01 5.404538461538470528e+02 2.529679565429690058e+02 -5.095581054687500000e+00 4.074897766113280140e-01 2.941176593303679865e-01 1.366218994140619998e+03 1.378211975097660025e+00 1.000000000000000000e+00 5.017396926879879970e+01 -8.375000000000000000e+01 5.475000000000000000e+01
1.400000000000000000e+01 5.317076923076920139e+02 2.753724365234380116e+02 -4.965301513671880329e+00 4.033328592777249977e-01 0.000000000000000000e+00 1.370935913085940001e+03 1.373259782791139916e+00 1.000000000000000000e+00 3.877664566040039773e+01 -8.325000000000000000e+01 5.475000000000000000e+01
3.600000000000000000e+01 5.266153846153849827e+02 2.874617309570310226e+02 -4.835052490234380329e+00 3.949807286262509987e-01 0.000000000000000000e+00 1.375652832031250000e+03 1.365926980972290039e+00 3.000000000000000000e+00 1.766699218750000000e+01 -8.275000000000000000e+01 5.475000000000000000e+01
1.600000000000000000e+01 6.958999999999999773e+02 3.771864013671880116e+02 -4.988983154296880329e+00 4.883525669574739769e-01 2.000000000000000111e-01 1.333418212890619998e+03 1.244656443595890005e+00 1.000000000000000000e+00 1.921137237548830115e+02 -7.725000000000000000e+01 5.475000000000000000e+01
2.800000000000000000e+01 7.028076923076920366e+02 3.783524780273439774e+02 -5.156402587890619671e+00 5.147644877433780186e-01 5.714285714285709944e-02 1.321368530273440001e+03 1.236187934875490058e+00 3.000000000000000000e+00 2.537943572998050001e+02 -7.675000000000000000e+01 5.475000000000000000e+01
2.300000000000000000e+01 7.028384615384619565e+02 3.772299499511719887e+02 -5.294067382812500000e+00 5.401811599731449753e-01 5.714285714285709944e-02 1.331898803710940001e+03 1.231288433074950062e+00 3.000000000000000000e+00 2.794515380859380116e+02 -7.625000000000000000e+01 5.475000000000000000e+01
2.400000000000000000e+01 7.216923076923079634e+02 3.750713195800780113e+02 -5.431732177734380329e+00 5.630126595497130237e-01 8.571428571428570120e-02 1.342428955078119998e+03 1.223887920379640004e+00 3.000000000000000000e+00 3.402325134277339771e+02 -7.575000000000000000e+01 5.475000000000000000e+01
6.000000000000000000e+00 7.215538461538460524e+02 3.735274353027339771e+02 -5.673522949218750000e+00 5.568256378173830345e-01 8.571428571428570120e-02 1.352155639648440001e+03 1.229192256927490012e+00 1.000000000000000000e+00 3.788477478027339771e+02 -7.475000000000000000e+01 5.475000000000000000e+01
1.700000000000000000e+01 7.351769230769230035e+02 3.701901550292969887e+02 -5.744079589843750000e+00 5.989661216735839844e-01 5.714285714285709944e-02 1.340018432617190001e+03 1.224604964256289952e+00 1.000000000000000000e+00 3.623228454589839771e+02 -7.425000000000000000e+01 5.475000000000000000e+01
2.000000000000000000e+01 7.450615384615380208e+02 3.689439086914060226e+02 -5.814666748046880329e+00 5.936686992645260341e-01 2.857142857142859829e-02 1.327881225585940001e+03 1.210425615310670056e+00 3.000000000000000000e+00 3.893669433593750000e+02 -7.375000000000000000e+01 5.475000000000000000e+01
1.200000000000000000e+01 7.492538461538459842e+02 3.690603942871089771e+02 -5.885223388671880329e+00 5.930857658386230469e-01 2.857142857142859829e-02 1.315744018554690001e+03 1.103667259216309926e+00 1.000000000000000000e+00 4.021051635742189774e+02 -7.325000000000000000e+01 5.475000000000000000e+01
2.800000000000000000e+01 7.623692307692309669e+02 3.819386901855469887e+02 -5.863006591796880329e+00 5.899696946144099563e-01 5.882353186607359730e-01 1.289793579101559999e+03 1.221166014671329902e+00 3.000000000000000000e+00 4.376013793945310226e+02 -7.225000000000000000e+01 5.475000000000000000e+01
2.700000000000000000e+01 7.647384615384620474e+02 3.922948913574219887e+02 -5.817474365234380329e+00 5.354970693588260167e-01 5.714285714285709944e-02 1.263603759765619998e+03 1.233731508254999998e+00 3.000000000000000000e+00 4.744165344238280113e+02 -7.125000000000000000e+01 5.475000000000000000e+01
1.700000000000000000e+01 8.122923076923069630e+02 4.395045166015619884e+02 -6.157104492187500000e+00 5.671430230140690476e-01 0.000000000000000000e+00 1.181498168945309999e+03 1.247309088706969993e+00 1.000000000000000000e+00 5.900407104492189774e+02 -6.825000000000000000e+01 5.475000000000000000e+01
2.400000000000000000e+01 8.140538461538460524e+02 4.400795898437500000e+02 -6.263458251953119671e+00 5.685336589813230201e-01 0.000000000000000000e+00 1.168440185546880002e+03 1.235217452049260034e+00 3.000000000000000000e+00 5.607415161132810226e+02 -6.775000000000000000e+01 5.475000000000000000e+01
8.000000000000000000e+00 8.297153846153850054e+02 4.397661437988280113e+02 -6.349151611328119671e+00 6.320198774337769665e-01 0.000000000000000000e+00 1.159468261718750000e+03 1.213451743125919968e+00 1.000000000000000000e+00 6.610838012695310226e+02 -6.725000000000000000e+01 5.475000000000000000e+01
3.300000000000000000e+01 8.226923076923079634e+02 4.444443664550780113e+02 -6.479339599609380329e+00 5.630550980567929908e-01 0.000000000000000000e+00 1.149696655273440001e+03 1.127340555191040039e+00 3.000000000000000000e+00 4.919622802734380116e+02 -6.625000000000000000e+01 5.475000000000000000e+01
2.900000000000000000e+01 8.221923076923079634e+02 4.417311401367189774e+02 -6.544433593750000000e+00 5.786459445953370251e-01 0.000000000000000000e+00 1.144810913085940001e+03 1.200060248374940075e+00 3.000000000000000000e+00 5.205924072265620453e+02 -6.575000000000000000e+01 5.475000000000000000e+01
2.400000000000000000e+01 8.205923076923070312e+02 4.342765808105469887e+02 -6.486267089843750000e+00 5.536118149757389695e-01 0.000000000000000000e+00 1.145605712890619998e+03 1.201384067535399947e+00 3.000000000000000000e+00 4.775017089843750000e+02 -6.525000000000000000e+01 5.475000000000000000e+01
1.900000000000000000e+01 8.381923076923079634e+02 4.132656860351560226e+02 -6.287750244140619671e+00 5.763943195343019799e-01 2.352941185235979948e-01 1.150982543945309999e+03 9.723548889160159581e-01 1.000000000000000000e+00 5.497208862304689774e+02 -6.425000000000000000e+01 5.475000000000000000e+01
1.200000000000000000e+01 8.345769230769229807e+02 3.985198059082030113e+02 -5.802734375000000000e+00 5.765643715858459473e-01 0.000000000000000000e+00 1.177593994140619998e+03 1.185336112976070000e+00 1.000000000000000000e+00 5.493787841796879547e+02 -6.325000000000000000e+01 5.475000000000000000e+01
1.700000000000000000e+01 8.443076923076920366e+02 4.024212036132810226e+02 -5.416961669921880329e+00 4.497916400432590001e-01 0.000000000000000000e+00 1.201516845703119998e+03 1.161587834358219995e+00 1.000000000000000000e+00 3.833635253906250000e+02 -6.275000000000000000e+01 5.475000000000000000e+01
8.000000000000000000e+00 8.622153846153850054e+02 4.145307617187500000e+02 -5.031219482421880329e+00 5.393349528312679775e-01 0.000000000000000000e+00 1.225439819335940001e+03 1.120435833930969904e+00 1.000000000000000000e+00 5.553965454101560226e+02 -6.225000000000000000e+01 5.475000000000000000e+01
7.000000000000000000e+00 8.838153846153840050e+02 4.307326049804689774e+02 -4.632354736328119671e+00 5.828586220741269752e-01 5.882352963089940157e-02 1.239623535156250000e+03 1.208190202713010031e+00 1.000000000000000000e+00 5.448877563476560226e+02 -6.175000000000000000e+01 5.475000000000000000e+01
5.200000000000000000e+01 8.787000000000000455e+02 4.454418029785160229e+02 -4.194274902343750000e+00 2.543426454067230225e-01 0.000000000000000000e+00 1.224589477539059999e+03 1.236153364181520109e+00 4.000000000000000000e+00 2.908436279296880116e+02 -6.125000000000000000e+01 5.475000000000000000e+01
2.900000000000000000e+01 8.857000000000009550e+02 4.546226196289060226e+02 -3.756195068359379885e+00 1.838919818401340001e-01 0.000000000000000000e+00 1.209555419921880002e+03 1.114781260490419923e+00 3.000000000000000000e+00 1.373125305175780113e+02 -6.075000000000000000e+01 5.475000000000000000e+01
3.000000000000000000e+01 8.951153846153839595e+02 4.628242492675780113e+02 -3.318084716796879885e+00 1.658542305231089919e-01 0.000000000000000000e+00 1.194521362304690001e+03 6.129660606384279564e-01 3.000000000000000000e+00 1.505392150878909945e+02 -6.025000000000000000e+01 5.475000000000000000e+01
2.800000000000000000e+01 9.084538461538460297e+02 4.750381774902339771e+02 -2.840240478515620115e+00 1.400392055511469891e-01 0.000000000000000000e+00 1.199866333007809999e+03 9.363127350807189941e-01 3.000000000000000000e+00 1.215829772949220029e+02 -5.975000000000000000e+01 5.475000000000000000e+01
2.000000000000000000e+01 9.278692307692299437e+02 4.951946105957030113e+02 -2.322662353515620115e+00 1.093120574951169932e-01 5.882352963089940157e-02 1.225590454101559999e+03 6.579532623291020066e-01 3.000000000000000000e+00 1.191736984252929972e+02 -5.925000000000000000e+01 5.475000000000000000e+01
4.200000000000000000e+01 5.050307692307690104e+02 2.610665893554689774e+02 -3.409301757812500000e+00 1.491190940141680077e-01 1.428571428571429880e-01 2.020283935546880002e+03 1.915284276008609954e+00 3.000000000000000000e+00 3.082076110839839771e+02 -9.975000000000000000e+01 5.525000000000000000e+01
4.300000000000000000e+01 5.111230769230770079e+02 2.754826049804689774e+02 -3.531982421875000000e+00 1.611028909683230037e-01 5.714285714285709944e-02 2.010561157226559999e+03 1.905774831771849920e+00 3.000000000000000000e+00 2.834948120117189774e+02 -9.925000000000000000e+01 5.525000000000000000e+01
2.900000000000000000e+01 5.159230769230770193e+02 2.832043151855469887e+02 -3.737670898437500000e+00 1.712922155857090067e-01 1.142857142857140046e-01 1.988904907226559999e+03 1.900099515914920101e+00 3.000000000000000000e+00 2.542550659179690058e+02 -9.875000000000000000e+01 5.525000000000000000e+01
6.700000000000000000e+01 5.241384615384620247e+02 2.862761535644530113e+02 -3.943359375000000000e+00 1.789712458848949916e-01 0.000000000000000000e+00 1.967248535156250000e+03 1.708469629287719949e+00 4.000000000000000000e+00 2.152008361816409945e+02 -9.825000000000000000e+01 5.525000000000000000e+01
4.500000000000000000e+01 5.684230769230770193e+02 2.828119812011719887e+02 -4.501708984375000000e+00 2.451198101043700062e-01 2.000000000000000111e-01 1.905629882812500000e+03 1.863451361656190075e+00 4.000000000000000000e+00 2.325866241455080115e+02 -9.675000000000000000e+01 5.525000000000000000e+01
3.900000000000000000e+01 5.759384615384609560e+02 2.829960632324219887e+02 -4.668273925781250000e+00 2.569814920425420035e-01 1.714285714285710138e-01 1.886207153320309999e+03 1.855453252792359953e+00 3.000000000000000000e+00 2.146466217041019888e+02 -9.625000000000000000e+01 5.525000000000000000e+01
3.900000000000000000e+01 5.783230769230769965e+02 2.918660278320310226e+02 -4.883087158203119671e+00 2.783021628856660046e-01 4.705882370471949905e-01 1.848062744140619998e+03 1.871122956275939941e+00 3.000000000000000000e+00 2.013363647460940058e+02 -9.525000000000000000e+01 5.525000000000000000e+01
3.500000000000000000e+01 5.891692307692310351e+02 2.932182006835939774e+02 -4.891906738281250000e+00 2.910185754299159933e-01 4.705882370471949905e-01 1.829574951171880002e+03 1.862908005714420057e+00 3.000000000000000000e+00 1.930976104736330115e+02 -9.475000000000000000e+01 5.525000000000000000e+01
3.700000000000000000e+01 5.963769230769230489e+02 2.951044311523439774e+02 -4.900726318359380329e+00 2.925049066543580212e-01 4.705882370471949905e-01 1.811087158203119998e+03 1.853841662406920054e+00 3.000000000000000000e+00 1.775415954589840055e+02 -9.425000000000000000e+01 5.525000000000000000e+01
2.500000000000000000e+01 6.046000000000000227e+02 2.945055236816410229e+02 -4.848602294921880329e+00 3.084233105182649926e-01 5.294117927551269531e-01 1.778634155273440001e+03 1.824800610542300028e+00 3.000000000000000000e+00 1.511336212158199999e+02 -9.325000000000000000e+01 5.525000000000000000e+01
2.500000000000000000e+01 5.992000000000000455e+02 2.865671997070310226e+02 -4.787658691406250000e+00 3.182201087474820222e-01 6.470588445663449928e-01 1.764668945312500000e+03 1.812793254852290037e+00 3.000000000000000000e+00 1.457088470458980112e+02 -9.275000000000000000e+01 5.525000000000000000e+01
2.700000000000000000e+01 6.009538461538460297e+02 2.697557678222660229e+02 -4.726684570312500000e+00 3.283535838127140116e-01 7.647058963775630325e-01 1.750703735351559999e+03 1.806486964225769931e+00 3.000000000000000000e+00 1.307094726562500000e+02 -9.225000000000000000e+01 5.525000000000000000e+01
2.700000000000000000e+01 5.939307692307689877e+02 2.383756103515619884e+02 -4.678802490234380329e+00 3.104485273361209940e-01 7.647058963775630325e-01 1.734779663085940001e+03 1.809496521949770065e+00 3.000000000000000000e+00 1.135546493530270027e+02 -9.175000000000000000e+01 5.525000000000000000e+01
2.800000000000000000e+01 5.924153846153850509e+02 2.145203094482419885e+02 -4.670135498046880329e+00 3.193685114383699730e-01 2.941176593303679865e-01 1.712979003906250000e+03 1.799238443374630014e+00 3.000000000000000000e+00 1.085257186889650001e+02 -9.125000000000000000e+01 5.525000000000000000e+01
1.700000000000000000e+01 6.003999999999999773e+02 1.984737091064449999e+02 -4.661437988281250000e+00 3.624574244022369940e-01 0.000000000000000000e+00 1.691178344726559999e+03 1.774159669876099965e+00 1.000000000000000000e+00 1.204354782104490056e+02 -9.075000000000000000e+01 5.525000000000000000e+01
1.000000000000000000e+01 5.931923076923079634e+02 1.902228546142580115e+02 -4.652770996093750000e+00 3.697139024734499846e-01 2.941176593303679865e-01 1.669377685546880002e+03 1.752760052680969904e+00 1.000000000000000000e+00 1.158271713256840059e+02 -9.025000000000000000e+01 5.525000000000000000e+01
2.500000000000000000e+01 5.912307692307690559e+02 1.870912017822269888e+02 -4.673065185546880329e+00 4.025259613990779806e-01 0.000000000000000000e+00 1.642125610351559999e+03 1.735814452171329902e+00 3.000000000000000000e+00 1.162058410644529971e+02 -8.975000000000000000e+01 5.525000000000000000e+01
2.300000000000000000e+01 5.924769230769229580e+02 1.870961761474609943e+02 -4.722320556640619671e+00 4.141679108142850008e-01 2.352941185235979948e-01 1.609422119140619998e+03 1.664860725402830033e+00 3.000000000000000000e+00 1.199540328979490056e+02 -8.925000000000000000e+01 5.525000000000000000e+01
3.400000000000000000e+01 5.788999999999999773e+02 2.000064392089840055e+02 -4.820861816406250000e+00 4.290911853313449931e-01 5.294117927551269531e-01 1.544015258789059999e+03 1.404875755310059926e+00 3.000000000000000000e+00 8.095977020263670454e+01 -8.825000000000000000e+01 5.525000000000000000e+01
1.000000000000000000e+01 5.847923076923079861e+02 2.111871185302730112e+02 -5.037353515625000000e+00 4.804198443889620140e-01 2.857142857142859829e-02 1.463620971679690001e+03 1.386557340621950019e+00 1.000000000000000000e+00 1.134973220825200002e+02 -8.775000000000000000e+01 5.525000000000000000e+01
1.200000000000000000e+01 5.693461538461540385e+02 2.273164520263669885e+02 -5.854064941406250000e+00 4.997662305831909735e-01 2.857142857142859829e-02 1.174747192382809999e+03 1.367695093154909891e+00 1.000000000000000000e+00 7.914701843261720171e+01 -8.625000000000000000e+01 5.525000000000000000e+01
1.800000000000000000e+01 5.427461538461540158e+02 2.272789916992190058e+02 -5.840393066406250000e+00 4.518590569496149789e-01 2.857142857142859829e-02 1.168618530273440001e+03 1.384732961654659977e+00 1.000000000000000000e+00 3.813983154296879974e+01 -8.575000000000000000e+01 5.525000000000000000e+01
2.100000000000000000e+01 6.911307692307690331e+02 3.734454040527339771e+02 -5.469177246093750000e+00 5.833627581596370071e-01 1.142857142857140046e-01 1.157829589843750000e+03 1.181763291358949974e+00 3.000000000000000000e+00 1.567905731201169885e+02 -7.725000000000000000e+01 5.525000000000000000e+01
2.000000000000000000e+01 6.954769230769229580e+02 3.741561889648439774e+02 -5.600067138671880329e+00 6.000324487686159447e-01 5.714285714285709944e-02 1.156242431640619998e+03 1.144980192184450019e+00 3.000000000000000000e+00 1.986261444091800001e+02 -7.675000000000000000e+01 5.525000000000000000e+01
3.000000000000000000e+01 6.989307692307689877e+02 3.743131713867189774e+02 -5.745758056640619671e+00 6.189165711402889736e-01 0.000000000000000000e+00 1.244768066406250000e+03 1.180152535438540040e+00 3.000000000000000000e+00 2.847834167480469887e+02 -7.575000000000000000e+01 5.525000000000000000e+01
1.600000000000000000e+01 7.069769230769229580e+02 3.724722290039060226e+02 -5.818603515625000000e+00 6.099654436111450195e-01 5.714285714285709944e-02 1.289030883789059999e+03 1.174552202224729891e+00 1.000000000000000000e+00 3.113682250976560226e+02 -7.525000000000000000e+01 5.525000000000000000e+01
3.600000000000000000e+01 7.151000000000000227e+02 3.723910522460939774e+02 -5.892059326171880329e+00 6.347454786300660290e-01 2.857142857142859829e-02 1.306889404296880002e+03 1.173542737960820093e+00 3.000000000000000000e+00 3.419106140136719887e+02 -7.475000000000000000e+01 5.525000000000000000e+01
1.200000000000000000e+01 7.176076923076919911e+02 3.695332031250000000e+02 -5.966094970703119671e+00 6.250486373901370518e-01 0.000000000000000000e+00 1.298343505859380002e+03 1.174491167068479891e+00 1.000000000000000000e+00 3.726172180175780113e+02 -7.425000000000000000e+01 5.525000000000000000e+01
2.800000000000000000e+01 7.309846153846150401e+02 3.675378417968750000e+02 -6.114166259765619671e+00 6.298828721046449974e-01 2.857142857142859829e-02 1.281251708984380002e+03 1.103930711746220039e+00 3.000000000000000000e+00 4.155745849609380116e+02 -7.325000000000000000e+01 5.525000000000000000e+01
1.400000000000000000e+01 7.425538461538460524e+02 3.733916015625000000e+02 -6.118072509765619671e+00 5.971797704696659714e-01 2.352941185235979948e-01 1.258540771484380002e+03 9.396340847015379749e-01 1.000000000000000000e+00 4.019642333984380116e+02 -7.225000000000000000e+01 5.525000000000000000e+01
2.500000000000000000e+01 7.872153846153839822e+02 4.131106262207030113e+02 -6.162628173828119671e+00 6.393196582794189453e-01 2.352941185235979948e-01 1.207819458007809999e+03 1.181444048881530096e+00 3.000000000000000000e+00 4.519222106933589771e+02 -7.025000000000000000e+01 5.525000000000000000e+01
1.800000000000000000e+01 8.038307692307689649e+02 4.235393981933589771e+02 -6.193267822265619671e+00 6.854236721992490455e-01 2.857142857142859829e-02 1.194215576171880002e+03 1.170737147331240013e+00 1.000000000000000000e+00 5.444483032226560226e+02 -6.975000000000000000e+01 5.525000000000000000e+01
3.100000000000000000e+01 8.097846153846149946e+02 4.297574157714839771e+02 -6.237854003906250000e+00 7.166505455970759719e-01 0.000000000000000000e+00 1.180676147460940001e+03 7.030095458030699573e-01 3.000000000000000000e+00 5.427692871093750000e+02 -6.925000000000000000e+01 5.525000000000000000e+01
1.200000000000000000e+01 8.065000000000000000e+02 4.331910705566410229e+02 -6.324310302734380329e+00 6.717769503593440383e-01 0.000000000000000000e+00 1.167330078125000000e+03 1.190155267715450105e+00 1.000000000000000000e+00 5.353725585937500000e+02 -6.875000000000000000e+01 5.525000000000000000e+01
6.000000000000000000e+00 7.990692307692310123e+02 4.356381835937500000e+02 -6.410766601562500000e+00 5.784978270530699573e-01 0.000000000000000000e+00 1.153984008789059999e+03 1.195776820182800071e+00 1.000000000000000000e+00 4.537858886718750000e+02 -6.825000000000000000e+01 5.525000000000000000e+01
1.500000000000000000e+01 8.147769230769230262e+02 4.371685180664060226e+02 -6.497253417968750000e+00 6.352759599685670056e-01 0.000000000000000000e+00 1.140637939453119998e+03 1.032372713088989924e+00 1.000000000000000000e+00 4.776534118652339771e+02 -6.775000000000000000e+01 5.525000000000000000e+01
2.900000000000000000e+01 8.045307692307690104e+02 4.389049072265619884e+02 -6.553741455078119671e+00 6.089673042297359951e-01 0.000000000000000000e+00 1.130844604492190001e+03 1.192225098609920098e+00 3.000000000000000000e+00 4.953437805175780113e+02 -6.725000000000000000e+01 5.525000000000000000e+01
2.100000000000000000e+01 7.958615384615389985e+02 4.417765808105469887e+02 -6.580261230468750000e+00 6.617713570594789818e-01 0.000000000000000000e+00 1.124603881835940001e+03 6.415815949440000221e-01 3.000000000000000000e+00 5.581866455078120453e+02 -6.675000000000000000e+01 5.525000000000000000e+01
8.000000000000000000e+00 7.920692307692310123e+02 4.438839111328119884e+02 -6.606781005859380329e+00 7.247003316879270240e-01 0.000000000000000000e+00 1.118363281250000000e+03 1.152827382087709962e+00 1.000000000000000000e+00 6.519368286132810226e+02 -6.625000000000000000e+01 5.525000000000000000e+01
5.000000000000000000e+00 7.846153846153849827e+02 4.423854675292969887e+02 -6.633331298828119671e+00 6.345753669738769531e-01 0.000000000000000000e+00 1.112122558593750000e+03 8.326793909072880417e-01 1.000000000000000000e+00 5.601179199218750000e+02 -6.575000000000000000e+01 5.525000000000000000e+01
1.700000000000000000e+01 7.895923076923070312e+02 4.381982116699219887e+02 -6.549255371093750000e+00 5.726712346076969773e-01 0.000000000000000000e+00 1.108539184570309999e+03 6.371788978576660156e-01 1.000000000000000000e+00 4.421655578613280113e+02 -6.525000000000000000e+01 5.525000000000000000e+01
1.100000000000000000e+01 7.968153846153850282e+02 4.326024169921880116e+02 -6.428314208984380329e+00 6.217784285545350231e-01 0.000000000000000000e+00 1.105841430664059999e+03 1.124921202659610042e+00 1.000000000000000000e+00 4.987153015136719887e+02 -6.475000000000000000e+01 5.525000000000000000e+01
1.800000000000000000e+01 7.952076923076920139e+02 4.146365661621089771e+02 -6.186462402343750000e+00 6.387908458709720128e-01 0.000000000000000000e+00 1.100446044921880002e+03 1.124638557434080033e+00 1.000000000000000000e+00 5.170726928710939774e+02 -6.375000000000000000e+01 5.525000000000000000e+01
6.000000000000000000e+00 8.149153846153850509e+02 4.133562622070310226e+02 -5.311981201171880329e+00 7.219710946083069958e-01 0.000000000000000000e+00 1.158735961914059999e+03 9.731848239898680530e-01 1.000000000000000000e+00 6.268753051757810226e+02 -6.275000000000000000e+01 5.525000000000000000e+01
4.000000000000000000e+00 8.542538461538470074e+02 4.189719543457030113e+02 -4.874755859375000000e+00 5.667232871055599697e-01 0.000000000000000000e+00 1.187880981445309999e+03 1.027027368545530006e+00 1.000000000000000000e+00 5.823677368164060226e+02 -6.225000000000000000e+01 5.525000000000000000e+01
1.200000000000000000e+01 8.666153846153849827e+02 4.224056091308589771e+02 -4.450439453125000000e+00 4.104521870613099810e-01 2.352941185235979948e-01 1.198253051757809999e+03 1.140727043151859910e+00 1.000000000000000000e+00 3.780148620605469887e+02 -6.175000000000000000e+01 5.525000000000000000e+01
1.500000000000000000e+01 8.641923076923070539e+02 4.253778686523439774e+02 -4.064880371093750000e+00 2.336391061544420000e-01 5.882352963089940157e-02 1.152306640625000000e+03 1.175015330314640005e+00 1.000000000000000000e+00 1.425700378417969887e+02 -6.125000000000000000e+01 5.525000000000000000e+01
2.800000000000000000e+01 5.014076923076920025e+02 2.745179443359380116e+02 -4.093322753906250000e+00 1.885353624820710061e-01 2.285714285714290084e-01 1.920137329101559999e+03 1.686381578445429907e+00 3.000000000000000000e+00 3.135720214843750000e+02 -9.975000000000000000e+01 5.575000000000000000e+01
5.200000000000000000e+01 5.042692307692310010e+02 2.802334899902339771e+02 -4.235992431640619671e+00 1.982166618108749945e-01 5.714285714285709944e-02 1.908722778320309999e+03 1.875838041305539994e+00 4.000000000000000000e+00 2.640777282714839771e+02 -9.925000000000000000e+01 5.575000000000000000e+01
5.800000000000000000e+01 5.454461538461539476e+02 2.832987976074219887e+02 -4.649108886718750000e+00 2.723141610622409892e-01 0.000000000000000000e+00 1.866862060546880002e+03 1.838737249374390093e+00 4.000000000000000000e+00 2.645237426757810226e+02 -9.825000000000000000e+01 5.575000000000000000e+01
6.000000000000000000e+01 5.597230769230769738e+02 2.837608032226560226e+02 -4.855651855468750000e+00 2.679323852062229783e-01 5.882353186607359730e-01 1.845931640625000000e+03 1.837179303169250044e+00 4.000000000000000000e+00 2.084330596923830115e+02 -9.775000000000000000e+01 5.575000000000000000e+01
2.500000000000000000e+01 5.746615384615380435e+02 2.817546997070310226e+02 -5.460327148437500000e+00 3.432649970054629796e-01 2.285714285714290084e-01 1.761885498046880002e+03 1.813308715820310058e+00 3.000000000000000000e+00 1.816446075439449999e+02 -9.525000000000000000e+01 5.575000000000000000e+01
3.000000000000000000e+01 5.799384615384619792e+02 2.834789733886719887e+02 -5.423187255859380329e+00 3.554207682609559771e-01 9.411764740943909802e-01 1.748097900390619998e+03 1.807732343673710051e+00 3.000000000000000000e+00 1.646082611083980112e+02 -9.475000000000000000e+01 5.575000000000000000e+01
3.800000000000000000e+01 5.842615384615389758e+02 2.851843261718750000e+02 -5.386016845703119671e+00 3.552935123443600185e-01 3.529411852359770063e-01 1.734310302734380002e+03 1.796091198921200061e+00 3.000000000000000000e+00 1.399097290039059942e+02 -9.425000000000000000e+01 5.575000000000000000e+01
2.400000000000000000e+01 5.885692307692310123e+02 2.857404174804689774e+02 -5.348876953125000000e+00 3.798255920410160136e-01 2.857142857142859760e-01 1.720522705078119998e+03 1.782480478286740055e+00 3.000000000000000000e+00 1.376401519775390057e+02 -9.375000000000000000e+01 5.575000000000000000e+01
2.300000000000000000e+01 5.833769230769230489e+02 2.794595642089839771e+02 -5.155090332031250000e+00 4.073222279548650016e-01 8.235294222831730515e-01 1.693643920898440001e+03 1.761623263359070046e+00 3.000000000000000000e+00 1.535318603515619884e+02 -9.275000000000000000e+01 5.575000000000000000e+01
2.700000000000000000e+01 5.795307692307690104e+02 2.698967895507810226e+02 -5.058197021484380329e+00 3.904356956481930263e-01 2.941176593303679865e-01 1.680204467773440001e+03 1.757757663726809971e+00 3.000000000000000000e+00 1.016461410522459943e+02 -9.225000000000000000e+01 5.575000000000000000e+01
1.500000000000000000e+01 5.702846153846149946e+02 2.527243804931640057e+02 -4.977630615234380329e+00 3.953254222869870271e-01 4.705882370471949905e-01 1.664398559570309999e+03 1.758490920066829943e+00 1.000000000000000000e+00 1.252483673095699999e+02 -9.175000000000000000e+01 5.575000000000000000e+01
2.300000000000000000e+01 5.676384615384620247e+02 2.314755096435550001e+02 -4.946105957031250000e+00 4.193802475929260254e-01 5.714285714285709944e-02 1.641493164062500000e+03 1.744224548339839975e+00 3.000000000000000000e+00 1.323394165039059942e+02 -9.125000000000000000e+01 5.575000000000000000e+01
1.800000000000000000e+01 5.794923076923080316e+02 2.095649871826169885e+02 -4.914581298828119671e+00 4.518175125122069757e-01 0.000000000000000000e+00 1.618587646484380002e+03 1.614781618118289908e+00 1.000000000000000000e+00 1.411889038085940058e+02 -9.075000000000000000e+01 5.575000000000000000e+01
1.600000000000000000e+01 5.792000000000000455e+02 1.932440490722659945e+02 -4.883026123046880329e+00 4.659858942031859796e-01 5.294117927551269531e-01 1.595682128906250000e+03 1.562511324882509989e+00 1.000000000000000000e+00 1.427830505371090055e+02 -9.025000000000000000e+01 5.575000000000000000e+01
1.800000000000000000e+01 5.742923076923079861e+02 1.867407073974609943e+02 -4.877319335937500000e+00 4.960607886314389869e-01 5.294117927551269531e-01 1.566964233398440001e+03 1.416402697563170054e+00 1.000000000000000000e+00 1.532933654785159945e+02 -8.975000000000000000e+01 5.575000000000000000e+01
2.000000000000000000e+01 5.715923076923080544e+02 1.899208831787109943e+02 -4.897430419921880329e+00 5.101683139801029832e-01 5.882352963089940157e-02 1.532433837890619998e+03 1.377500534057620074e+00 3.000000000000000000e+00 1.354503631591800001e+02 -8.925000000000000000e+01 5.575000000000000000e+01
2.500000000000000000e+01 5.676230769230769511e+02 2.120560913085940058e+02 -5.221801757812500000e+00 5.196976661682130016e-01 2.352941185235979948e-01 1.355166992187500000e+03 1.348268628120419921e+00 3.000000000000000000e+00 3.630416488647460227e+01 -8.775000000000000000e+01 5.575000000000000000e+01
2.200000000000000000e+01 5.581307692307690331e+02 2.181264038085940058e+02 -5.593963623046880329e+00 5.323492288589479760e-01 2.352941185235979948e-01 1.222402343750000000e+03 1.334195613861079988e+00 3.000000000000000000e+00 3.104202079772949929e+01 -8.725000000000000000e+01 5.575000000000000000e+01
1.500000000000000000e+01 6.716307692307690331e+02 3.728665161132810226e+02 -6.043762207031250000e+00 6.570994257926939808e-01 2.857142857142859829e-02 9.911162109375000000e+02 9.827100038528440162e-01 1.000000000000000000e+00 2.409067993164059942e+02 -7.675000000000000000e+01 5.575000000000000000e+01
1.600000000000000000e+01 6.828846153846160405e+02 3.714487609863280113e+02 -6.051788330078119671e+00 6.646087169647220128e-01 0.000000000000000000e+00 1.069111694335940001e+03 5.691452026367189720e-01 1.000000000000000000e+00 2.472135620117190058e+02 -7.625000000000000000e+01 5.575000000000000000e+01
1.700000000000000000e+01 6.784230769230770193e+02 3.686639709472660229e+02 -6.110595703125000000e+00 6.061784029006960228e-01 0.000000000000000000e+00 1.261623168945309999e+03 1.166617631912229891e+00 1.000000000000000000e+00 2.924616699218750000e+02 -7.475000000000000000e+01 5.575000000000000000e+01
2.000000000000000000e+01 6.920076923076919684e+02 3.671463317871089771e+02 -6.188079833984380329e+00 6.534813642501829944e-01 0.000000000000000000e+00 1.256668579101559999e+03 1.166630506515500043e+00 3.000000000000000000e+00 3.133516845703119884e+02 -7.425000000000000000e+01 5.575000000000000000e+01
1.700000000000000000e+01 7.000923076923080544e+02 3.658659057617189774e+02 -6.265594482421880329e+00 6.491055488586430222e-01 0.000000000000000000e+00 1.251713989257809999e+03 1.080992102622990059e+00 1.000000000000000000e+00 3.619580688476560226e+02 -7.375000000000000000e+01 5.575000000000000000e+01
7.000000000000000000e+00 7.148076923076920366e+02 3.685538635253910229e+02 -6.373107910156250000e+00 6.094406843185420364e-01 0.000000000000000000e+00 1.227287963867190001e+03 9.961355924606319912e-01 1.000000000000000000e+00 3.950920715332030113e+02 -7.225000000000000000e+01 5.575000000000000000e+01
1.200000000000000000e+01 7.266615384615380435e+02 3.748904418945310226e+02 -6.379180908203119671e+00 6.540311574935909755e-01 0.000000000000000000e+00 1.216869262695309999e+03 1.146973133087159979e+00 1.000000000000000000e+00 4.654452209472660229e+02 -7.175000000000000000e+01 5.575000000000000000e+01
1.800000000000000000e+01 7.355384615384620020e+02 3.845582885742189774e+02 -6.385253906250000000e+00 6.152860522270200416e-01 2.857142857142859829e-02 1.206450439453119998e+03 1.174466609954829988e+00 1.000000000000000000e+00 3.588356323242189774e+02 -7.125000000000000000e+01 5.575000000000000000e+01
2.900000000000000000e+01 7.452461538461540158e+02 3.956195983886719887e+02 -6.419738769531250000e+00 6.411750912666319691e-01 0.000000000000000000e+00 1.193302734375000000e+03 1.176997065544129972e+00 3.000000000000000000e+00 4.187828369140619884e+02 -7.075000000000000000e+01 5.575000000000000000e+01
2.400000000000000000e+01 7.522384615384610242e+02 4.054864501953119884e+02 -6.454223632812500000e+00 6.781827807426450416e-01 0.000000000000000000e+00 1.180155029296880002e+03 1.165372967720029962e+00 3.000000000000000000e+00 5.070025329589839771e+02 -7.025000000000000000e+01 5.575000000000000000e+01
1.400000000000000000e+01 7.811923076923079634e+02 4.152911376953119884e+02 -6.488708496093750000e+00 6.816155910491940029e-01 0.000000000000000000e+00 1.167007324218750000e+03 1.137099862098690073e+00 1.000000000000000000e+00 4.309963073730469887e+02 -6.975000000000000000e+01 5.575000000000000000e+01
1.000000000000000000e+01 7.910000000000000000e+02 4.212511596679689774e+02 -6.531219482421880329e+00 6.929040551185610131e-01 0.000000000000000000e+00 1.153738037109380002e+03 1.120547175407409890e+00 1.000000000000000000e+00 4.286069030761719887e+02 -6.925000000000000000e+01 5.575000000000000000e+01
6.000000000000000000e+00 7.725000000000000000e+02 4.248054199218750000e+02 -6.597839355468750000e+00 6.067835688591000087e-01 0.000000000000000000e+00 1.140103881835940001e+03 1.173606395721439988e+00 1.000000000000000000e+00 3.338833312988280113e+02 -6.875000000000000000e+01 5.575000000000000000e+01
3.000000000000000000e+01 7.761384615384620247e+02 4.289287414550780113e+02 -6.664428710937500000e+00 5.275106430053709827e-01 5.882353186607359730e-01 1.126469848632809999e+03 9.111219644546509899e-01 3.000000000000000000e+00 3.013778991699219887e+02 -6.825000000000000000e+01 5.575000000000000000e+01
4.000000000000000000e+00 7.832153846153850054e+02 4.374715881347660229e+02 -6.758331298828119671e+00 6.968601942062380150e-01 0.000000000000000000e+00 1.102220947265619998e+03 1.103048205375670054e+00 1.000000000000000000e+00 4.832873840332030113e+02 -6.725000000000000000e+01 5.575000000000000000e+01
2.100000000000000000e+01 7.738384615384619565e+02 4.402812194824219887e+02 -6.746307373046880329e+00 6.849215030670170457e-01 0.000000000000000000e+00 1.094625366210940001e+03 5.836147665977480248e-01 3.000000000000000000e+00 4.476566467285160229e+02 -6.675000000000000000e+01 5.575000000000000000e+01
1.100000000000000000e+01 7.712846153846160178e+02 4.417483825683589771e+02 -6.734252929687500000e+00 6.983172893524169922e-01 0.000000000000000000e+00 1.087029785156250000e+03 5.805696845054629796e-01 1.000000000000000000e+00 4.868324584960939774e+02 -6.625000000000000000e+01 5.575000000000000000e+01
2.500000000000000000e+01 7.650153846153849599e+02 4.417071838378910229e+02 -6.722198486328119671e+00 6.485813260078430176e-01 2.352941185235979948e-01 1.079434326171880002e+03 5.790897011756900303e-01 3.000000000000000000e+00 5.068322143554689774e+02 -6.575000000000000000e+01 5.575000000000000000e+01
1.300000000000000000e+01 7.662615384615379526e+02 4.397505798339839771e+02 -6.612243652343750000e+00 7.290889024734500401e-01 0.000000000000000000e+00 1.071472534179690001e+03 5.872058272361759812e-01 1.000000000000000000e+00 5.873918457031250000e+02 -6.525000000000000000e+01 5.575000000000000000e+01
7.000000000000000000e+00 7.713692307692309669e+02 4.386830139160160229e+02 -6.469635009765619671e+00 7.013118267059329503e-01 0.000000000000000000e+00 1.063388671875000000e+03 1.048797011375429911e+00 1.000000000000000000e+00 4.812661132812500000e+02 -6.475000000000000000e+01 5.575000000000000000e+01
1.200000000000000000e+01 7.737000000000000455e+02 4.321880493164060226e+02 -6.327026367187500000e+00 6.034355163574219860e-01 0.000000000000000000e+00 1.055304931640619998e+03 1.111796379089359910e+00 1.000000000000000000e+00 4.132424316406250000e+02 -6.425000000000000000e+01 5.575000000000000000e+01
1.200000000000000000e+01 7.791076923076930143e+02 4.299598083496089771e+02 -6.184387207031250000e+00 6.591221690177919701e-01 0.000000000000000000e+00 1.047221069335940001e+03 9.796922802925109863e-01 1.000000000000000000e+00 5.313784790039060226e+02 -6.375000000000000000e+01 5.575000000000000000e+01
3.000000000000000000e+01 7.774307692307689877e+02 4.321679077148439774e+02 -5.695678710937500000e+00 6.732529401779170364e-01 0.000000000000000000e+00 1.081588134765619998e+03 5.343609452247619629e-01 3.000000000000000000e+00 5.059622802734380116e+02 -6.325000000000000000e+01 5.575000000000000000e+01
5.000000000000000000e+00 8.055384615384620020e+02 4.365148315429689774e+02 -5.206970214843750000e+00 6.022722125053410203e-01 5.882352963089940157e-02 1.115955078125000000e+03 8.233730792999269799e-01 1.000000000000000000e+00 4.846524658203119884e+02 -6.275000000000000000e+01 5.575000000000000000e+01
9.000000000000000000e+00 8.507692307692309441e+02 4.389691772460939774e+02 -4.718261718750000000e+00 5.830552577972409889e-01 2.352941185235979948e-01 1.150322143554690001e+03 7.902476191520689808e-01 1.000000000000000000e+00 4.493597717285160229e+02 -6.225000000000000000e+01 5.575000000000000000e+01
1.600000000000000000e+01 8.672846153846149946e+02 4.398632507324219887e+02 -4.268493652343750000e+00 5.486003756523130104e-01 2.352941185235979948e-01 1.156882690429690001e+03 9.473795890808109910e-01 1.000000000000000000e+00 3.589900817871089771e+02 -6.175000000000000000e+01 5.575000000000000000e+01
3.500000000000000000e+01 8.697769230769230262e+02 4.344666442871089771e+02 -3.935455322265620115e+00 3.982658386230469860e-01 0.000000000000000000e+00 1.080023803710940001e+03 1.127669215202329989e+00 3.000000000000000000e+00 2.247713623046880116e+02 -6.125000000000000000e+01 5.575000000000000000e+01
3.800000000000000000e+01 4.912230769230769738e+02 2.794677124023439774e+02 -4.759826660156250000e+00 2.819713950157169968e-01 5.714285714285709944e-02 1.821118408203119998e+03 1.855760097503660111e+00 3.000000000000000000e+00 2.880841979980469887e+02 -9.975000000000000000e+01 5.625000000000000000e+01
4.700000000000000000e+01 5.160307692307690104e+02 2.818029479980469887e+02 -5.122100830078119671e+00 3.427588343620299738e-01 7.647058963775630325e-01 1.788299560546880002e+03 1.809649705886839932e+00 4.000000000000000000e+00 2.839397888183589771e+02 -9.875000000000000000e+01 5.625000000000000000e+01
4.300000000000000000e+01 5.349076923076919456e+02 2.852794494628910229e+02 -5.325286865234380329e+00 3.407414555549619917e-01 1.142857142857140046e-01 1.768313598632809999e+03 1.790428996086119939e+00 3.000000000000000000e+00 2.699998779296880116e+02 -9.825000000000000000e+01 5.625000000000000000e+01
2.700000000000000000e+01 5.520153846153849599e+02 2.868329772949219887e+02 -5.528472900390619671e+00 3.702887892723080165e-01 5.882352963089940157e-02 1.748327758789059999e+03 1.772482037544250044e+00 3.000000000000000000e+00 2.467487487792969887e+02 -9.775000000000000000e+01 5.625000000000000000e+01
3.900000000000000000e+01 5.589692307692309896e+02 2.859424133300780113e+02 -5.801818847656250000e+00 4.219394326210019752e-01 5.882353186607359730e-01 1.716587768554690001e+03 1.746454954147339977e+00 3.000000000000000000e+00 2.162818908691409945e+02 -9.675000000000000000e+01 5.625000000000000000e+01
6.800000000000000000e+01 5.636769230769230035e+02 2.828050842285160229e+02 -5.916320800781250000e+00 4.115054905414580189e-01 4.000000000000000222e-01 1.702089721679690001e+03 1.738810896873469902e+00 4.000000000000000000e+00 1.822834930419919885e+02 -9.625000000000000000e+01 5.625000000000000000e+01
5.300000000000000000e+01 5.663230769230769965e+02 2.810806274414060226e+02 -6.030822753906250000e+00 4.453948438167569801e-01 2.571428571428570065e-01 1.687591674804690001e+03 1.735881447792049892e+00 4.000000000000000000e+00 1.843469696044919885e+02 -9.575000000000000000e+01 5.625000000000000000e+01
2.300000000000000000e+01 5.703153846153850282e+02 2.806643066406250000e+02 -5.921508789062500000e+00 4.548185169696810082e-01 2.285714285714290084e-01 1.667010742187500000e+03 1.736157298088069956e+00 3.000000000000000000e+00 1.569449920654300001e+02 -9.475000000000000000e+01 5.625000000000000000e+01
2.100000000000000000e+01 5.771384615384610015e+02 2.822634582519530113e+02 -5.842712402343750000e+00 4.616631865501399923e-01 3.529411852359770063e-01 1.657321289062500000e+03 1.730347871780399949e+00 3.000000000000000000e+00 1.343840484619140057e+02 -9.425000000000000000e+01 5.625000000000000000e+01
2.000000000000000000e+01 5.691307692307690331e+02 2.831808166503910229e+02 -5.763885498046880329e+00 4.447320699691770240e-01 1.142857142857140046e-01 1.647631835937500000e+03 1.733047604560850052e+00 3.000000000000000000e+00 9.739437103271480112e+01 -9.375000000000000000e+01 5.625000000000000000e+01
1.700000000000000000e+01 5.596769230769230035e+02 2.834947814941410229e+02 -5.643676757812500000e+00 4.377565979957580011e-01 3.529411852359770063e-01 1.630913330078119998e+03 1.737283349037169966e+00 1.000000000000000000e+00 8.417530059814450283e+01 -9.325000000000000000e+01 5.625000000000000000e+01
4.000000000000000000e+01 5.641076923076919911e+02 2.813586730957030113e+02 -5.523498535156250000e+00 4.364384710788730137e-01 5.882353186607359730e-01 1.614194702148440001e+03 1.728668570518490100e+00 3.000000000000000000e+00 7.454388427734380684e+01 -9.275000000000000000e+01 5.625000000000000000e+01
2.100000000000000000e+01 5.584461538461539476e+02 2.684710998535160229e+02 -5.300537109375000000e+00 5.040379166603089489e-01 1.142857142857140046e-01 1.579067260742190001e+03 1.463148474693299894e+00 3.000000000000000000e+00 1.336609954833980112e+02 -9.175000000000000000e+01 5.625000000000000000e+01
2.600000000000000000e+01 5.654769230769229580e+02 2.574324340820310226e+02 -5.250091552734380329e+00 5.517507195472719506e-01 2.352941185235979948e-01 1.555587158203119998e+03 1.406133651733399992e+00 3.000000000000000000e+00 1.658209228515619884e+02 -9.125000000000000000e+01 5.625000000000000000e+01
2.400000000000000000e+01 5.616384615384620247e+02 2.395787200927730112e+02 -5.199676513671880329e+00 5.664390325546260208e-01 0.000000000000000000e+00 1.532107055664059999e+03 1.368508219718929997e+00 3.000000000000000000e+00 1.720549316406250000e+02 -9.075000000000000000e+01 5.625000000000000000e+01
2.100000000000000000e+01 5.638999999999999773e+02 2.171811065673830115e+02 -5.149230957031250000e+00 5.658628344535829857e-01 4.705882370471949905e-01 1.508626953125000000e+03 1.461968779563900034e+00 3.000000000000000000e+00 1.542351074218750000e+02 -9.025000000000000000e+01 5.625000000000000000e+01
2.000000000000000000e+01 5.374846153846150401e+02 2.040102844238280113e+02 -5.117156982421880329e+00 5.344720482826229579e-01 5.294117927551269531e-01 1.407734619140619998e+03 1.364401936531070003e+00 3.000000000000000000e+00 6.048418426513669743e+01 -8.875000000000000000e+01 5.625000000000000000e+01
1.500000000000000000e+01 5.304615384615379980e+02 2.088024597167969887e+02 -5.114440917968750000e+00 5.365428328514100231e-01 5.714285714285709944e-02 1.372073730468750000e+03 1.359530806541439985e+00 1.000000000000000000e+00 2.433452224731449931e+01 -8.825000000000000000e+01 5.625000000000000000e+01
1.800000000000000000e+01 6.676307692307690331e+02 3.674389648437500000e+02 -6.364440917968750000e+00 7.278376221656800427e-01 0.000000000000000000e+00 1.062487915039059999e+03 1.115779638290409936e+00 1.000000000000000000e+00 2.588358459472660229e+02 -7.575000000000000000e+01 5.625000000000000000e+01
1.600000000000000000e+01 6.814846153846150401e+02 3.657360839843750000e+02 -6.321472167968750000e+00 7.170045375823970168e-01 0.000000000000000000e+00 1.166983398437500000e+03 1.103313565254210094e+00 1.000000000000000000e+00 2.694122619628910229e+02 -7.525000000000000000e+01 5.625000000000000000e+01
1.500000000000000000e+01 6.872615384615379526e+02 3.659311828613280113e+02 -6.504516601562500000e+00 7.458711266517640270e-01 0.000000000000000000e+00 1.214711547851559999e+03 9.311547279357910156e-01 1.000000000000000000e+00 3.607840576171880116e+02 -7.375000000000000000e+01 5.625000000000000000e+01
2.000000000000000000e+00 6.930153846153840504e+02 3.660287170410160229e+02 -6.586334228515619671e+00 7.014737725257870204e-01 0.000000000000000000e+00 1.212903686523440001e+03 9.859660863876340553e-01 1.000000000000000000e+00 3.521074218750000000e+02 -7.325000000000000000e+01 5.625000000000000000e+01
1.100000000000000000e+01 6.947769230769230262e+02 3.637146301269530113e+02 -6.620056152343750000e+00 6.781230568885799892e-01 0.000000000000000000e+00 1.205407958984380002e+03 8.804175853729250267e-01 1.000000000000000000e+00 3.531479187011719887e+02 -7.275000000000000000e+01 5.625000000000000000e+01
1.400000000000000000e+01 6.968384615384619565e+02 3.605547180175780113e+02 -6.637756347656250000e+00 7.320029735565189988e-01 0.000000000000000000e+00 1.196016113281250000e+03 1.002319216728210005e+00 1.000000000000000000e+00 4.143096923828119884e+02 -7.225000000000000000e+01 5.625000000000000000e+01
1.100000000000000000e+01 6.973307692307689649e+02 3.637463378906250000e+02 -6.655456542968750000e+00 7.050255537033079944e-01 0.000000000000000000e+00 1.186624267578119998e+03 1.130012750625609907e+00 1.000000000000000000e+00 3.963080139160160229e+02 -7.175000000000000000e+01 5.625000000000000000e+01
1.300000000000000000e+01 7.213846153846150173e+02 3.792112121582030113e+02 -6.707916259765619671e+00 6.877024769783020020e-01 0.000000000000000000e+00 1.164362304687500000e+03 6.368224024772639602e-01 1.000000000000000000e+00 3.717596130371089771e+02 -7.075000000000000000e+01 5.625000000000000000e+01
2.500000000000000000e+01 7.328923076923080089e+02 3.877324218750000000e+02 -6.742706298828119671e+00 7.011829018592830032e-01 0.000000000000000000e+00 1.151492065429690001e+03 1.018613457679750089e+00 3.000000000000000000e+00 4.016611328125000000e+02 -7.025000000000000000e+01 5.625000000000000000e+01
2.100000000000000000e+01 7.359230769230770193e+02 3.925539855957030113e+02 -6.777496337890619671e+00 6.969789862632750355e-01 0.000000000000000000e+00 1.138621948242190001e+03 1.130623936653140094e+00 3.000000000000000000e+00 4.116336059570310226e+02 -6.975000000000000000e+01 5.625000000000000000e+01
3.200000000000000000e+01 7.333923076923069857e+02 3.996293334960939774e+02 -6.814910888671880329e+00 6.173734664916989967e-01 0.000000000000000000e+00 1.125488769531250000e+03 5.915339589118959740e-01 3.000000000000000000e+00 3.098997192382810226e+02 -6.925000000000000000e+01 5.625000000000000000e+01
1.200000000000000000e+01 7.171384615384610015e+02 4.042235717773439774e+02 -6.860137939453119671e+00 5.529758930206299938e-01 0.000000000000000000e+00 1.111566650390619998e+03 8.917701840400700242e-01 1.000000000000000000e+00 2.336625671386719887e+02 -6.875000000000000000e+01 5.625000000000000000e+01
1.600000000000000000e+01 7.371846153846159950e+02 4.093465576171880116e+02 -6.905395507812500000e+00 6.019433736801149681e-01 0.000000000000000000e+00 1.097644653320309999e+03 7.880217432975770153e-01 1.000000000000000000e+00 2.925050964355469887e+02 -6.825000000000000000e+01 5.625000000000000000e+01
5.000000000000000000e+00 7.556923076923070539e+02 4.209620056152339771e+02 -6.949218750000000000e+00 6.812629103660580165e-01 0.000000000000000000e+00 1.072123046875000000e+03 5.766018629074100010e-01 1.000000000000000000e+00 3.785983581542969887e+02 -6.725000000000000000e+01 5.625000000000000000e+01
7.000000000000000000e+00 7.530923076923080544e+02 4.316488342285160229e+02 -6.853118896484380329e+00 6.499283313751219593e-01 0.000000000000000000e+00 1.053569091796880002e+03 5.723278522491459519e-01 1.000000000000000000e+00 3.762397766113280113e+02 -6.625000000000000000e+01 5.625000000000000000e+01
2.700000000000000000e+01 7.607230769230769738e+02 4.353562011718750000e+02 -6.805053710937500000e+00 6.592270135879519932e-01 0.000000000000000000e+00 1.044291992187500000e+03 5.651040673255920410e-01 3.000000000000000000e+00 4.277881164550780113e+02 -6.575000000000000000e+01 5.625000000000000000e+01
3.000000000000000000e+00 7.596692307692310351e+02 4.376132812500000000e+02 -6.672485351562500000e+00 6.958299875259400524e-01 0.000000000000000000e+00 1.031967407226559999e+03 9.927079677581790440e-01 1.000000000000000000e+00 4.784231262207030113e+02 -6.525000000000000000e+01 5.625000000000000000e+01
6.000000000000000000e+00 7.609538461538460297e+02 4.371426391601560226e+02 -6.511718750000000000e+00 5.773841142654420056e-01 0.000000000000000000e+00 1.018626831054690001e+03 1.102475166320799893e+00 1.000000000000000000e+00 3.786418151855469887e+02 -6.475000000000000000e+01 5.625000000000000000e+01
1.100000000000000000e+01 7.745307692307690104e+02 4.420160217285160229e+02 -6.190216064453119671e+00 6.701493263244630016e-01 0.000000000000000000e+00 9.919456787109379547e+02 1.068192958831789996e+00 1.000000000000000000e+00 4.638409729003910229e+02 -6.375000000000000000e+01 5.625000000000000000e+01
8.000000000000000000e+00 7.848923076923080089e+02 4.486506958007810226e+02 -5.665771484375000000e+00 6.715139746665950149e-01 0.000000000000000000e+00 1.027538085937500000e+03 7.665302753448489659e-01 1.000000000000000000e+00 4.764702148437500000e+02 -6.325000000000000000e+01 5.625000000000000000e+01
7.000000000000000000e+00 8.109076923076929688e+02 4.548049926757810226e+02 -5.141326904296880329e+00 6.139407753944400303e-01 0.000000000000000000e+00 1.063130371093750000e+03 5.292410254478450149e-01 1.000000000000000000e+00 4.262676086425780113e+02 -6.275000000000000000e+01 5.625000000000000000e+01
4.200000000000000000e+01 4.707615384615380094e+02 2.850988769531250000e+02 -5.299774169921880329e+00 3.437283933162689764e-01 1.000000000000000000e+00 1.730261230468750000e+03 1.822529911994930085e+00 3.000000000000000000e+00 2.713804321289060226e+02 -9.975000000000000000e+01 5.675000000000000000e+01
2.500000000000000000e+01 5.189076923076919456e+02 2.830274353027339771e+02 -5.787567138671880329e+00 4.403336346149440139e-01 2.941176593303679865e-01 1.683068725585940001e+03 1.736800074577329989e+00 3.000000000000000000e+00 2.664328002929689774e+02 -9.825000000000000000e+01 5.675000000000000000e+01
2.800000000000000000e+01 5.321923076923079634e+02 2.863427429199219887e+02 -5.956634521484380329e+00 4.968657493591310259e-01 5.882353186607359730e-01 1.665608764648440001e+03 1.607874274253850100e+00 3.000000000000000000e+00 2.867112121582030113e+02 -9.775000000000000000e+01 5.675000000000000000e+01
2.100000000000000000e+01 5.457769230769230262e+02 2.858876037597660229e+02 -6.080718994140619671e+00 5.228346586227420323e-01 5.294117927551269531e-01 1.650115722656250000e+03 1.618479967117310014e+00 3.000000000000000000e+00 2.704757385253910229e+02 -9.725000000000000000e+01 5.675000000000000000e+01
3.000000000000000000e+01 5.532692307692309441e+02 2.859066467285160229e+02 -6.159790039062500000e+00 5.446169972419739880e-01 5.882353186607359730e-01 1.636589599609380002e+03 1.683895587921139914e+00 3.000000000000000000e+00 2.520065765380859943e+02 -9.675000000000000000e+01 5.675000000000000000e+01
1.700000000000000000e+01 5.548076923076920366e+02 2.839754333496089771e+02 -6.238891601562500000e+00 5.250038504600520461e-01 5.294117927551269531e-01 1.623063476562500000e+03 1.531571984291079991e+00 1.000000000000000000e+00 2.110770721435550001e+02 -9.625000000000000000e+01 5.675000000000000000e+01
2.400000000000000000e+01 5.572615384615389758e+02 2.840607604980469887e+02 -6.317962646484380329e+00 5.341982245445250355e-01 2.571428571428570065e-01 1.609537231445309999e+03 1.670529961586000089e+00 3.000000000000000000e+00 1.891998138427730112e+02 -9.575000000000000000e+01 5.675000000000000000e+01
2.000000000000000000e+01 5.606923076923079634e+02 2.841199035644530113e+02 -6.270812988281250000e+00 5.529835820198060192e-01 5.882353186607359730e-01 1.598694213867190001e+03 1.666671633720399948e+00 3.000000000000000000e+00 1.937855072021480112e+02 -9.525000000000000000e+01 5.675000000000000000e+01
3.000000000000000000e+01 5.606923076923079634e+02 2.855608825683589771e+02 -6.181579589843750000e+00 5.672550201416020066e-01 2.941176593303679865e-01 1.588745605468750000e+03 1.662455201148989925e+00 3.000000000000000000e+00 2.001545257568359943e+02 -9.475000000000000000e+01 5.675000000000000000e+01
2.900000000000000000e+01 5.659307692307689877e+02 2.872439575195310226e+02 -6.092346191406250000e+00 5.674048662185670056e-01 4.705882370471949905e-01 1.578796875000000000e+03 1.660020470619200106e+00 3.000000000000000000e+00 1.326187896728519888e+02 -9.425000000000000000e+01 5.675000000000000000e+01
1.200000000000000000e+01 5.567923076923079861e+02 2.888362121582030113e+02 -6.003112792968750000e+00 5.404568314552310460e-01 5.882353186607359730e-01 1.568848266601559999e+03 1.665869951248170056e+00 1.000000000000000000e+00 8.553327178955079546e+01 -9.375000000000000000e+01 5.675000000000000000e+01
1.100000000000000000e+01 5.451538461538459615e+02 2.894877014160160229e+02 -5.899078369140619671e+00 5.172680020332339756e-01 1.428571428571429880e-01 1.473778320312500000e+03 1.447736501693730027e+00 1.000000000000000000e+00 4.098532867431639914e+01 -9.275000000000000000e+01 5.675000000000000000e+01
1.700000000000000000e+01 5.419153846153850509e+02 2.852033386230469887e+02 -5.847045898437500000e+00 5.304976105690000221e-01 5.882353186607359730e-01 1.426243408203119998e+03 1.359985947608949974e+00 1.000000000000000000e+00 4.152288436889649859e+01 -9.225000000000000000e+01 5.675000000000000000e+01
2.200000000000000000e+01 5.366538461538459615e+02 2.822526855468750000e+02 -5.797821044921880329e+00 5.547459721565249913e-01 5.882352963089940157e-02 1.385537597656250000e+03 1.348816156387329990e+00 3.000000000000000000e+00 6.370685195922850141e+01 -9.175000000000000000e+01 5.675000000000000000e+01
2.100000000000000000e+01 5.397615384615389758e+02 2.775720520019530113e+02 -5.756988525390619671e+00 5.877842903137210362e-01 2.857142857142859829e-02 1.365319213867190001e+03 1.333686709403989923e+00 3.000000000000000000e+00 7.771306610107420454e+01 -9.125000000000000000e+01 5.675000000000000000e+01
1.800000000000000000e+01 5.407384615384610242e+02 2.703360900878910229e+02 -5.716156005859380329e+00 6.000890731811520107e-01 4.705882370471949905e-01 1.345100952148440001e+03 1.324351549148560014e+00 1.000000000000000000e+00 7.743944549560549717e+01 -9.075000000000000000e+01 5.675000000000000000e+01
1.100000000000000000e+01 5.317307692307690559e+02 2.572402343750000000e+02 -5.675323486328119671e+00 5.989978313446040481e-01 5.294117927551269531e-01 1.324882568359380002e+03 1.324617981910710007e+00 1.000000000000000000e+00 5.846564102172850141e+01 -9.025000000000000000e+01 5.675000000000000000e+01
1.600000000000000000e+01 5.226384615384620247e+02 2.377664642333980112e+02 -5.665008544921880329e+00 5.853718519210819871e-01 2.352941185235979948e-01 1.298897949218750000e+03 1.332634329795840067e+00 1.000000000000000000e+00 3.471508026123049717e+01 -8.975000000000000000e+01 5.675000000000000000e+01
1.400000000000000000e+01 5.215153846153849599e+02 2.280070495605469887e+02 -5.685180664062500000e+00 5.874552130699159935e-01 0.000000000000000000e+00 1.267146972656250000e+03 1.336747884750369986e+00 1.000000000000000000e+00 2.017998313903810015e+01 -8.925000000000000000e+01 5.675000000000000000e+01
8.000000000000000000e+00 6.547846153846149946e+02 3.644218139648439774e+02 -6.601074218750000000e+00 7.476922869682309791e-01 5.882352963089940157e-02 1.072254516601559999e+03 1.071328878402709961e+00 1.000000000000000000e+00 2.062329711914059942e+02 -7.575000000000000000e+01 5.675000000000000000e+01
8.000000000000000000e+00 6.698692307692309669e+02 3.631702270507810226e+02 -6.606933593750000000e+00 7.254871726036069557e-01 0.000000000000000000e+00 1.150906005859380002e+03 1.060116171836849919e+00 1.000000000000000000e+00 2.342508544921880116e+02 -7.525000000000000000e+01 5.675000000000000000e+01
8.000000000000000000e+00 6.737153846153850054e+02 3.634250793457030113e+02 -6.656066894531250000e+00 7.464213371276859910e-01 0.000000000000000000e+00 1.189292114257809999e+03 1.041847467422490014e+00 1.000000000000000000e+00 2.855773925781250000e+02 -7.475000000000000000e+01 5.675000000000000000e+01
1.000000000000000000e+00 6.746769230769230035e+02 3.615060119628910229e+02 -6.748474121093750000e+00 7.327197194099429600e-01 0.000000000000000000e+00 1.187412963867190001e+03 1.064667701721190074e+00 1.000000000000000000e+00 2.551935424804690058e+02 -7.425000000000000000e+01 5.675000000000000000e+01
1.200000000000000000e+01 6.770692307692310123e+02 3.621845703125000000e+02 -6.933288574218750000e+00 7.670791149139399856e-01 0.000000000000000000e+00 1.183654663085940001e+03 8.442507386207579456e-01 1.000000000000000000e+00 2.921921997070310226e+02 -7.325000000000000000e+01 5.675000000000000000e+01
1.000000000000000000e+01 6.766615384615380435e+02 3.548786621093750000e+02 -6.963073730468750000e+00 7.565465569496150344e-01 0.000000000000000000e+00 1.175222412109380002e+03 1.097782850265500043e+00 1.000000000000000000e+00 3.641505737304689774e+02 -7.275000000000000000e+01 5.675000000000000000e+01
7.000000000000000000e+00 6.815076923076929916e+02 3.471399841308589771e+02 -6.971984863281250000e+00 7.188422679901119716e-01 0.000000000000000000e+00 1.164605712890619998e+03 1.107300043106079990e+00 1.000000000000000000e+00 3.121589660644530113e+02 -7.225000000000000000e+01 5.675000000000000000e+01
5.000000000000000000e+00 6.845307692307690104e+02 3.499923706054689774e+02 -6.980865478515619671e+00 7.280195951461789772e-01 0.000000000000000000e+00 1.153989135742190001e+03 8.457139730453490101e-01 1.000000000000000000e+00 3.543861083984380116e+02 -7.175000000000000000e+01 5.675000000000000000e+01
1.600000000000000000e+01 6.956615384615389530e+02 3.575269470214839771e+02 -6.989776611328119671e+00 6.938484311103819691e-01 0.000000000000000000e+00 1.143372558593750000e+03 6.701660156250000000e-01 1.000000000000000000e+00 2.865787048339839771e+02 -7.125000000000000000e+01 5.675000000000000000e+01
9.000000000000000000e+00 7.069846153846150401e+02 3.648677673339839771e+02 -6.999237060546880329e+00 7.366341352462769665e-01 0.000000000000000000e+00 1.129487182617190001e+03 5.744932293891910069e-01 1.000000000000000000e+00 3.609033203125000000e+02 -7.075000000000000000e+01 5.675000000000000000e+01
3.000000000000000000e+00 7.085923076923070312e+02 3.716714477539060226e+02 -7.008697509765619671e+00 7.611307501792909935e-01 0.000000000000000000e+00 1.115601806640619998e+03 1.065947890281679911e+00 1.000000000000000000e+00 3.885753173828119884e+02 -7.025000000000000000e+01 5.675000000000000000e+01
5.000000000000000000e+00 7.018923076923080089e+02 3.818541564941410229e+02 -7.028472900390619671e+00 7.085844278335570179e-01 0.000000000000000000e+00 1.087750000000000000e+03 5.785718560218809925e-01 1.000000000000000000e+00 3.162921142578119884e+02 -6.925000000000000000e+01 5.675000000000000000e+01
3.600000000000000000e+01 7.041923076923079634e+02 3.849258422851560226e+02 -7.041412353515619671e+00 7.262680530548100144e-01 0.000000000000000000e+00 1.073540649414059999e+03 5.841964483261109509e-01 3.000000000000000000e+00 2.173418426513669885e+02 -6.875000000000000000e+01 5.675000000000000000e+01
1.800000000000000000e+01 7.156384615384620247e+02 3.871746215820310226e+02 -7.054351806640619671e+00 6.287548542022709519e-01 0.000000000000000000e+00 1.059331420898440001e+03 5.856104493141169876e-01 1.000000000000000000e+00 2.158920898437500000e+02 -6.825000000000000000e+01 5.675000000000000000e+01
2.000000000000000000e+01 7.163846153846150173e+02 3.895226440429689774e+02 -7.067291259765619671e+00 6.452643871307369716e-01 0.000000000000000000e+00 1.045122070312500000e+03 5.832008123397830479e-01 3.000000000000000000e+00 2.649891052246089771e+02 -6.775000000000000000e+01 5.675000000000000000e+01
7.000000000000000000e+00 7.210076923076919684e+02 3.920629272460939774e+02 -7.040985107421880329e+00 6.390936970710749954e-01 0.000000000000000000e+00 1.031356323242190001e+03 7.012023329734800026e-01 1.000000000000000000e+00 2.868538818359380116e+02 -6.725000000000000000e+01 5.675000000000000000e+01
4.000000000000000000e+00 7.317615384615379526e+02 3.955793151855469887e+02 -6.975402832031250000e+00 6.932470202445979446e-01 0.000000000000000000e+00 1.018034179687500000e+03 7.833921313285829857e-01 1.000000000000000000e+00 3.203096923828119884e+02 -6.675000000000000000e+01 5.675000000000000000e+01
2.000000000000000000e+00 7.541000000000000227e+02 3.964099731445310226e+02 -6.712921142578119671e+00 7.844581604003909581e-01 0.000000000000000000e+00 9.748137207031250000e+02 5.351551771163940430e-01 1.000000000000000000e+00 4.669546203613280113e+02 -6.525000000000000000e+01 5.675000000000000000e+01
1.100000000000000000e+01 7.538076923076920366e+02 3.971119384765619884e+02 -6.559600830078119671e+00 7.325596213340760388e-01 0.000000000000000000e+00 9.571528320312500000e+02 1.054559230804440029e+00 1.000000000000000000e+00 4.474161071777339771e+02 -6.475000000000000000e+01 5.675000000000000000e+01
8.000000000000000000e+00 7.877307692307690559e+02 4.164778442382810226e+02 -6.252990722656250000e+00 7.977793812751770020e-01 0.000000000000000000e+00 9.218309936523439774e+02 1.002539992332460050e+00 1.000000000000000000e+00 5.793900146484379547e+02 -6.375000000000000000e+01 5.675000000000000000e+01
2.000000000000000000e+00 7.948307692307689649e+02 4.260511474609380116e+02 -5.806671142578119671e+00 7.557671666145320266e-01 0.000000000000000000e+00 9.297231445312500000e+02 1.002912402153020022e+00 1.000000000000000000e+00 5.558328247070310226e+02 -6.325000000000000000e+01 5.675000000000000000e+01
9.000000000000000000e+00 8.544307692307689877e+02 4.504158630371089771e+02 -4.914062500000000000e+00 6.121228933334349476e-01 0.000000000000000000e+00 9.455074462890620453e+02 5.282434225082399681e-01 1.000000000000000000e+00 3.413147277832030113e+02 -6.225000000000000000e+01 5.675000000000000000e+01
3.000000000000000000e+01 4.653846153846150173e+02 2.893861694335939774e+02 -5.979919433593750000e+00 4.806712865829469994e-01 5.294117927551269531e-01 1.627691528320309999e+03 1.742000579833979934e+00 3.000000000000000000e+00 2.830822448730469887e+02 -9.925000000000000000e+01 5.725000000000000000e+01
3.100000000000000000e+01 5.078076923076919797e+02 2.843699035644530113e+02 -6.384826660156250000e+00 5.786930918693540260e-01 5.294117927551269531e-01 1.582889770507809999e+03 1.470632076263429955e+00 3.000000000000000000e+00 2.730795898437500000e+02 -9.775000000000000000e+01 5.725000000000000000e+01
4.000000000000000000e+01 5.211846153846149718e+02 2.866398925781250000e+02 -6.474121093750000000e+00 5.865976810455320045e-01 5.294117927551269531e-01 1.569145629882809999e+03 1.586370348930359997e+00 3.000000000000000000e+00 2.600805969238280113e+02 -9.725000000000000000e+01 5.725000000000000000e+01
3.300000000000000000e+01 5.320692307692310123e+02 2.889892272949219887e+02 -6.517791748046880329e+00 6.354179382324219860e-01 7.647058963775630325e-01 1.556591430664059999e+03 1.637353420257569914e+00 3.000000000000000000e+00 2.626839904785160229e+02 -9.675000000000000000e+01 5.725000000000000000e+01
3.600000000000000000e+01 5.367769230769230262e+02 2.909717712402339771e+02 -6.561431884765619671e+00 6.184244751930240147e-01 5.294117927551269531e-01 1.544037109375000000e+03 1.627463102340700019e+00 3.000000000000000000e+00 2.088924255371090055e+02 -9.625000000000000000e+01 5.725000000000000000e+01
3.300000000000000000e+01 5.430153846153849599e+02 2.947088317871089771e+02 -6.605102539062500000e+00 6.409763693809510388e-01 5.882353186607359730e-01 1.531482910156250000e+03 1.538586735725399945e+00 3.000000000000000000e+00 2.134455261230469887e+02 -9.575000000000000000e+01 5.725000000000000000e+01
1.500000000000000000e+01 5.502846153846149946e+02 2.968170471191410229e+02 -6.541259765625000000e+00 6.603593230247499779e-01 1.428571428571429880e-01 1.520688354492190001e+03 1.333189129829410069e+00 1.000000000000000000e+00 2.049047088623050001e+02 -9.525000000000000000e+01 5.725000000000000000e+01
3.900000000000000000e+01 5.487000000000000455e+02 2.989354248046880116e+02 -6.441619873046880329e+00 6.719149947166439540e-01 2.941176593303679865e-01 1.510480468750000000e+03 1.339225888252260077e+00 3.000000000000000000e+00 2.078555297851559942e+02 -9.475000000000000000e+01 5.725000000000000000e+01
2.200000000000000000e+01 5.483153846153850282e+02 3.019028015136719887e+02 -6.341979980468750000e+00 6.356334090232850231e-01 8.571428571428570120e-02 1.500272583007809999e+03 1.585100531578059968e+00 3.000000000000000000e+00 1.409266052246090055e+02 -9.425000000000000000e+01 5.725000000000000000e+01
1.300000000000000000e+01 5.388461538461540385e+02 3.048012390136719887e+02 -6.242340087890619671e+00 6.029536724090579503e-01 5.294117927551269531e-01 1.490064575195309999e+03 1.425814270973210007e+00 1.000000000000000000e+00 8.273500061035160513e+01 -9.375000000000000000e+01 5.725000000000000000e+01
5.000000000000000000e+00 5.267307692307690559e+02 3.070729980468750000e+02 -6.258483886718750000e+00 6.016715168952939674e-01 6.470588445663449928e-01 1.411713256835940001e+03 1.323691964149479983e+00 1.000000000000000000e+00 6.366521072387700286e+01 -9.325000000000000000e+01 5.725000000000000000e+01
1.100000000000000000e+01 6.350307692307690104e+02 3.611394958496089771e+02 -6.782989501953119671e+00 7.719287872314449794e-01 0.000000000000000000e+00 1.029213867187500000e+03 1.060988306999210096e+00 1.000000000000000000e+00 1.929889526367190058e+02 -7.625000000000000000e+01 5.725000000000000000e+01
2.700000000000000000e+01 6.436153846153849827e+02 3.604815063476560226e+02 -6.837707519531250000e+00 7.491223812103270374e-01 0.000000000000000000e+00 1.082021240234380002e+03 1.033354878425599921e+00 3.000000000000000000e+00 2.047686462402340055e+02 -7.575000000000000000e+01 5.725000000000000000e+01
1.100000000000000000e+01 6.588461538461540385e+02 3.566970214843750000e+02 -7.074249267578119671e+00 7.924783825874329724e-01 0.000000000000000000e+00 1.158306518554690001e+03 1.038232088088989924e+00 1.000000000000000000e+00 2.671781921386719887e+02 -7.425000000000000000e+01 5.725000000000000000e+01
5.000000000000000000e+00 6.650384615384620020e+02 3.576808776855469887e+02 -7.280242919921880329e+00 8.079916834831240013e-01 0.000000000000000000e+00 1.154405517578119998e+03 1.052275419235229936e+00 1.000000000000000000e+00 3.490818481445310226e+02 -7.325000000000000000e+01 5.725000000000000000e+01
2.000000000000000000e+00 6.695692307692310123e+02 3.513444213867189774e+02 -7.306060791015619671e+00 8.134462833404539905e-01 0.000000000000000000e+00 1.145036743164059999e+03 1.038924455642699973e+00 1.000000000000000000e+00 3.660199279785160229e+02 -7.275000000000000000e+01 5.725000000000000000e+01
1.300000000000000000e+01 6.719769230769229580e+02 3.463611145019530113e+02 -7.306182861328119671e+00 7.987613677978520066e-01 0.000000000000000000e+00 1.133195434570309999e+03 1.022112131118769973e+00 1.000000000000000000e+00 3.158491516113280113e+02 -7.225000000000000000e+01 5.725000000000000000e+01
1.200000000000000000e+01 6.808923076923080089e+02 3.456881103515619884e+02 -7.306304931640619671e+00 7.208861708641050026e-01 0.000000000000000000e+00 1.121354003906250000e+03 1.041190624237060103e+00 1.000000000000000000e+00 1.992164001464840055e+02 -7.175000000000000000e+01 5.725000000000000000e+01
3.000000000000000000e+00 6.799769230769229580e+02 3.515938720703119884e+02 -7.306427001953119671e+00 7.803732156753540039e-01 0.000000000000000000e+00 1.109512573242190001e+03 7.106392383575439453e-01 1.000000000000000000e+00 2.930547485351560226e+02 -7.125000000000000000e+01 5.725000000000000000e+01
3.000000000000000000e+00 6.913384615384619565e+02 3.569614562988280113e+02 -7.290527343750000000e+00 6.872360706329350144e-01 0.000000000000000000e+00 1.094612060546880002e+03 1.075183987617490011e+00 1.000000000000000000e+00 1.644705352783199999e+02 -7.075000000000000000e+01 5.725000000000000000e+01
1.000000000000000000e+01 6.802076923076920139e+02 3.644725646972660229e+02 -7.274658203125000000e+00 7.700463533401490368e-01 0.000000000000000000e+00 1.079711425781250000e+03 1.033385157585140046e+00 1.000000000000000000e+00 3.056560668945310226e+02 -7.025000000000000000e+01 5.725000000000000000e+01
2.400000000000000000e+01 6.708769230769230489e+02 3.682843322753910229e+02 -7.258758544921880329e+00 6.709390282630920410e-01 0.000000000000000000e+00 1.064810913085940001e+03 6.610438227653500087e-01 3.000000000000000000e+00 1.981813354492190058e+02 -6.975000000000000000e+01 5.725000000000000000e+01
2.400000000000000000e+01 6.789846153846150401e+02 3.711563720703119884e+02 -7.242004394531250000e+00 6.893543004989619583e-01 0.000000000000000000e+00 1.050011230468750000e+03 5.648152828216550514e-01 3.000000000000000000e+00 1.785205688476559942e+02 -6.925000000000000000e+01 5.725000000000000000e+01
4.000000000000000000e+00 6.870769230769229807e+02 3.732030334472660229e+02 -7.222656250000000000e+00 7.327512502670290306e-01 0.000000000000000000e+00 1.035514648437500000e+03 5.686643719673160069e-01 1.000000000000000000e+00 2.793961791992189774e+02 -6.875000000000000000e+01 5.725000000000000000e+01
6.000000000000000000e+00 6.841307692307700563e+02 3.746500244140619884e+02 -7.203277587890619671e+00 7.126655578613280140e-01 0.000000000000000000e+00 1.021018066406250000e+03 5.734046101570130505e-01 1.000000000000000000e+00 2.279540557861330115e+02 -6.825000000000000000e+01 5.725000000000000000e+01
9.000000000000000000e+00 6.939538461538460297e+02 3.754295654296880116e+02 -7.183929443359380329e+00 6.888419389724730335e-01 0.000000000000000000e+00 1.006521484375000000e+03 6.289473772048950195e-01 1.000000000000000000e+00 2.573923645019530113e+02 -6.775000000000000000e+01 5.725000000000000000e+01
3.500000000000000000e+01 6.928076923076920366e+02 3.753477478027339771e+02 -7.132720947265619671e+00 5.732933282852169521e-01 0.000000000000000000e+00 9.905895385742189774e+02 8.552296757698060192e-01 3.000000000000000000e+00 1.122589263916020030e+02 -6.725000000000000000e+01 5.725000000000000000e+01
1.500000000000000000e+01 7.080538461538460524e+02 3.734626159667969887e+02 -7.049652099609380329e+00 6.952767372131349877e-01 0.000000000000000000e+00 9.732223510742189774e+02 7.530553340911869675e-01 1.000000000000000000e+00 2.976293334960939774e+02 -6.675000000000000000e+01 5.725000000000000000e+01
3.000000000000000000e+00 7.163230769230769965e+02 3.688572387695310226e+02 -6.966583251953119671e+00 7.105990052223210007e-01 0.000000000000000000e+00 9.558551025390620453e+02 1.020755171775820092e+00 1.000000000000000000e+00 3.515057373046880116e+02 -6.625000000000000000e+01 5.725000000000000000e+01
4.100000000000000000e+01 7.440230769230770420e+02 3.127463378906250000e+02 -6.753326416015619671e+00 6.496169567108149856e-01 0.000000000000000000e+00 9.176600952148439774e+02 5.178115367889399856e-01 3.000000000000000000e+00 3.025739746093750000e+02 -6.525000000000000000e+01 5.725000000000000000e+01
7.000000000000000000e+00 7.701615384615389530e+02 2.883130187988280113e+02 -6.607482910156250000e+00 8.186136484146120385e-01 0.000000000000000000e+00 8.956788330078120453e+02 9.795003533363340065e-01 1.000000000000000000e+00 5.203536987304689774e+02 -6.475000000000000000e+01 5.725000000000000000e+01
4.000000000000000000e+00 7.801538461538459615e+02 2.962434692382810226e+02 -6.461608886718750000e+00 8.250176310539250046e-01 0.000000000000000000e+00 8.736975708007810226e+02 8.013057708740229934e-01 1.000000000000000000e+00 5.705335693359379547e+02 -6.425000000000000000e+01 5.725000000000000000e+01
1.000000000000000000e+01 8.349461538461539476e+02 3.793282775878910229e+02 -5.211273193359380329e+00 3.696346282958979934e-01 0.000000000000000000e+00 7.922921142578120453e+02 5.053638219833369583e-01 1.000000000000000000e+00 1.042281036376949999e+02 -6.225000000000000000e+01 5.725000000000000000e+01
2.700000000000000000e+01 4.548153846153850282e+02 2.943852539062500000e+02 -6.510437011718750000e+00 6.157103180885310501e-01 5.882353186607359730e-01 1.537394531250000000e+03 1.377723455429080035e+00 3.000000000000000000e+00 3.375719909667969887e+02 -9.925000000000000000e+01 5.775000000000000000e+01
2.300000000000000000e+01 4.575923076923079975e+02 2.906404418945310226e+02 -6.611297607421880329e+00 6.130390763282780320e-01 2.000000000000000111e-01 1.524986694335940001e+03 1.363672614097600100e+00 3.000000000000000000e+00 2.918372802734380116e+02 -9.875000000000000000e+01 5.775000000000000000e+01
3.800000000000000000e+01 4.712769230769230262e+02 2.927523193359380116e+02 -6.712127685546880329e+00 6.538733243942259632e-01 1.428571428571429880e-01 1.512578735351559999e+03 1.343241572380069915e+00 3.000000000000000000e+00 2.994298706054689774e+02 -9.825000000000000000e+01 5.775000000000000000e+01
3.100000000000000000e+01 4.871615384615379867e+02 2.984258117675780113e+02 -6.812988281250000000e+00 6.804945468902590111e-01 5.294117927551269531e-01 1.500170776367190001e+03 1.321664214134220083e+00 3.000000000000000000e+00 3.114528503417969887e+02 -9.775000000000000000e+01 5.775000000000000000e+01
3.100000000000000000e+01 5.106615384615379867e+02 3.029192199707030113e+02 -6.875762939453119671e+00 7.185564637184139736e-01 2.941176593303679865e-01 1.476593261718750000e+03 1.350999593734740101e+00 3.000000000000000000e+00 2.929223632812500000e+02 -9.675000000000000000e+01 5.775000000000000000e+01
2.900000000000000000e+01 5.176230769230769511e+02 3.095821838378910229e+02 -6.884002685546880329e+00 7.102361917495729760e-01 2.941176593303679865e-01 1.465010864257809999e+03 1.380593419075009987e+00 3.000000000000000000e+00 2.233167572021480112e+02 -9.625000000000000000e+01 5.775000000000000000e+01
2.300000000000000000e+01 5.293923076923080089e+02 3.196217346191410229e+02 -6.811737060546880329e+00 7.322881817817690209e-01 8.571428571428570120e-02 1.442682495117190001e+03 1.260851860046390049e+00 3.000000000000000000e+00 1.948545532226559942e+02 -9.525000000000000000e+01 5.775000000000000000e+01
2.000000000000000000e+01 5.315000000000000000e+02 3.228826599121089771e+02 -6.701690673828119671e+00 7.209331393241880104e-01 1.176470592617989974e-01 1.432215332031250000e+03 1.253926753997800070e+00 3.000000000000000000e+00 1.552154235839840055e+02 -9.475000000000000000e+01 5.775000000000000000e+01
1.100000000000000000e+01 5.310923076923080544e+02 3.248141479492189774e+02 -6.591613769531250000e+00 6.836498379707339756e-01 1.764705926179890028e-01 1.421748168945309999e+03 1.257944822311400035e+00 1.000000000000000000e+00 8.596768188476559658e+01 -9.425000000000000000e+01 5.775000000000000000e+01
1.200000000000000000e+01 5.193538461538460069e+02 3.257522277832030113e+02 -6.481536865234380329e+00 6.669861078262330212e-01 8.571428571428570120e-02 1.411281005859380002e+03 1.268245697021479934e+00 1.000000000000000000e+00 6.084837722778320312e+01 -9.375000000000000000e+01 5.775000000000000000e+01
1.500000000000000000e+01 5.093769230769229921e+02 3.260068969726560226e+02 -6.565887451171880329e+00 6.672417521476750046e-01 2.857142857142859829e-02 1.302113159179690001e+03 1.275824427604679956e+00 1.000000000000000000e+00 4.140675735473629970e+01 -9.325000000000000000e+01 5.775000000000000000e+01
1.900000000000000000e+01 6.094384615384609560e+02 3.607573547363280113e+02 -6.970764160156250000e+00 7.784930467605589710e-01 0.000000000000000000e+00 1.064824707031250000e+03 1.023762583732600095e+00 1.000000000000000000e+00 1.193331985473629970e+02 -7.625000000000000000e+01 5.775000000000000000e+01
1.800000000000000000e+01 6.187692307692300346e+02 3.587217407226560226e+02 -7.074340820312500000e+00 7.823342084884640224e-01 0.000000000000000000e+00 1.091787963867190001e+03 1.017473936080929953e+00 1.000000000000000000e+00 1.550246734619140057e+02 -7.575000000000000000e+01 5.775000000000000000e+01
1.000000000000000000e+00 6.344230769230770193e+02 3.560100402832030113e+02 -7.177886962890619671e+00 8.152818679809570312e-01 0.000000000000000000e+00 1.118751220703119998e+03 7.820108532905579724e-01 1.000000000000000000e+00 2.195699615478519888e+02 -7.525000000000000000e+01 5.775000000000000000e+01
2.000000000000000000e+00 6.548923076923080089e+02 3.515917968750000000e+02 -7.513610839843750000e+00 8.149925470352169521e-01 0.000000000000000000e+00 1.127178222656250000e+03 9.559279084205629662e-01 1.000000000000000000e+00 2.758464965820310226e+02 -7.375000000000000000e+01 5.775000000000000000e+01
1.000000000000000000e+00 6.515307692307690104e+02 3.521855773925780113e+02 -7.627197265625000000e+00 8.029609918594360352e-01 0.000000000000000000e+00 1.125156372070309999e+03 1.015902876853939985e+00 1.000000000000000000e+00 2.060795745849609943e+02 -7.325000000000000000e+01 5.775000000000000000e+01
1.000000000000000000e+00 6.521461538461539931e+02 3.470076904296880116e+02 -7.649078369140619671e+00 8.118355274200439453e-01 0.000000000000000000e+00 1.114851196289059999e+03 1.019946813583370027e+00 1.000000000000000000e+00 2.757777099609380116e+02 -7.275000000000000000e+01 5.775000000000000000e+01
2.000000000000000000e+00 6.561615384615389530e+02 3.429375915527339771e+02 -7.640411376953119671e+00 8.075142502784730114e-01 0.000000000000000000e+00 1.101785034179690001e+03 1.025767564773560014e+00 1.000000000000000000e+00 2.882894897460939774e+02 -7.225000000000000000e+01 5.775000000000000000e+01
2.000000000000000000e+00 6.634076923076919456e+02 3.553986511230469887e+02 -7.581848144531250000e+00 8.211951851844789818e-01 0.000000000000000000e+00 1.059736938476559999e+03 9.662100076675419480e-01 1.000000000000000000e+00 2.833488159179689774e+02 -7.075000000000000000e+01 5.775000000000000000e+01
5.000000000000000000e+00 6.456846153846149718e+02 3.597884521484380116e+02 -7.540618896484380329e+00 7.863923907279970482e-01 0.000000000000000000e+00 1.043821166992190001e+03 7.394947409629819557e-01 1.000000000000000000e+00 2.525316467285159945e+02 -7.025000000000000000e+01 5.775000000000000000e+01
1.000000000000000000e+01 6.422076923076920139e+02 3.641304626464839771e+02 -7.499389648437500000e+00 7.380760312080379970e-01 0.000000000000000000e+00 1.027905273437500000e+03 5.892959833145140491e-01 1.000000000000000000e+00 1.951700439453119884e+02 -6.975000000000000000e+01 5.775000000000000000e+01
4.100000000000000000e+01 6.458307692307689649e+02 3.664996032714839771e+02 -7.455566406250000000e+00 6.961312890052799851e-01 5.294117927551269531e-01 1.012272521972660002e+03 5.789250135421749599e-01 3.000000000000000000e+00 1.656589660644530113e+02 -6.925000000000000000e+01 5.775000000000000000e+01
1.900000000000000000e+01 6.507076923076920139e+02 3.672040405273439774e+02 -7.403900146484380329e+00 7.594821453094480201e-01 3.529411852359770063e-01 9.974886474609379547e+02 1.131980538368229983e+00 1.000000000000000000e+00 2.183103637695309942e+02 -6.875000000000000000e+01 5.775000000000000000e+01
2.900000000000000000e+01 6.517076923076920139e+02 3.681517944335939774e+02 -7.352233886718750000e+00 6.671760082244869716e-01 0.000000000000000000e+00 9.827047729492189774e+02 1.138647079467770107e+00 3.000000000000000000e+00 1.307790832519530113e+02 -6.825000000000000000e+01 5.775000000000000000e+01
3.000000000000000000e+00 6.672923076923079861e+02 3.689873046875000000e+02 -7.300567626953119671e+00 7.021793127059939854e-01 0.000000000000000000e+00 9.679208984375000000e+02 1.136288523674009898e+00 1.000000000000000000e+00 1.541508789062500000e+02 -6.775000000000000000e+01 5.775000000000000000e+01
1.500000000000000000e+01 6.892692307692309441e+02 3.638772583007810226e+02 -7.123870849609380329e+00 6.764634251594540126e-01 0.000000000000000000e+00 9.284104614257810226e+02 1.060919523239139961e+00 1.000000000000000000e+00 1.960795593261719887e+02 -6.675000000000000000e+01 5.775000000000000000e+01
2.600000000000000000e+01 7.007000000000000455e+02 3.486219177246089771e+02 -7.023284912109380329e+00 6.517741084098820359e-01 0.000000000000000000e+00 9.069981079101560226e+02 1.092450976371770022e+00 3.000000000000000000e+00 2.183026733398440058e+02 -6.625000000000000000e+01 5.775000000000000000e+01
7.000000000000000000e+00 7.208384615384610470e+02 3.150150451660160229e+02 -6.922698974609380329e+00 8.099564313888549805e-01 0.000000000000000000e+00 8.855858154296879547e+02 1.051777005195619896e+00 1.000000000000000000e+00 4.139905090332030113e+02 -6.575000000000000000e+01 5.775000000000000000e+01
6.000000000000000000e+00 7.733230769230769965e+02 2.160654602050780113e+02 -6.655364990234380329e+00 8.594260215759279564e-01 0.000000000000000000e+00 8.342048339843750000e+02 9.090786576271060460e-01 1.000000000000000000e+00 6.798215332031250000e+02 -6.475000000000000000e+01 5.775000000000000000e+01
2.000000000000000000e+00 7.940230769230770420e+02 2.023429412841800001e+02 -6.516937255859380329e+00 8.841282129287719727e-01 0.000000000000000000e+00 8.079031982421879547e+02 7.099615335464479760e-01 1.000000000000000000e+00 6.805135498046879547e+02 -6.425000000000000000e+01 5.775000000000000000e+01
5.000000000000000000e+00 8.004384615384609560e+02 2.060575561523440058e+02 -6.378540039062500000e+00 8.804435133934019886e-01 0.000000000000000000e+00 7.816015625000000000e+02 7.690528631210330479e-01 1.000000000000000000e+00 5.954909057617189774e+02 -6.375000000000000000e+01 5.775000000000000000e+01
9.000000000000000000e+00 8.014615384615379980e+02 2.135854644775390057e+02 -6.088500976562500000e+00 8.301753997802729934e-01 0.000000000000000000e+00 7.340933227539060226e+02 7.957164049148559570e-01 1.000000000000000000e+00 5.241501464843750000e+02 -6.325000000000000000e+01 5.775000000000000000e+01
7.000000000000000000e+00 8.027230769230769738e+02 2.237556762695309942e+02 -5.798492431640619671e+00 5.715137720108030006e-01 0.000000000000000000e+00 6.865850830078120453e+02 6.888399124145510033e-01 1.000000000000000000e+00 2.916907958984380116e+02 -6.275000000000000000e+01 5.775000000000000000e+01
2.200000000000000000e+01 4.365846153846150060e+02 3.018491516113280113e+02 -6.909820556640619671e+00 6.690508127212519973e-01 1.714285714285710138e-01 1.463132446289059999e+03 1.352169990539549893e+00 3.000000000000000000e+00 3.422698059082030113e+02 -9.975000000000000000e+01 5.825000000000000000e+01
2.800000000000000000e+01 4.398615384615379753e+02 2.956982421875000000e+02 -7.027984619140619671e+00 7.110682725906369850e-01 1.142857142857140046e-01 1.452522216796880002e+03 1.336229920387270065e+00 3.000000000000000000e+00 3.558095092773439774e+02 -9.925000000000000000e+01 5.825000000000000000e+01
3.100000000000000000e+01 4.467769230769230262e+02 2.944262390136719887e+02 -7.094818115234380329e+00 7.143106460571290173e-01 8.571428571428570120e-02 1.442464965820309999e+03 1.320408701896669923e+00 3.000000000000000000e+00 3.157325439453119884e+02 -9.875000000000000000e+01 5.825000000000000000e+01
2.200000000000000000e+01 4.527076923076920139e+02 3.051134948730469887e+02 -7.161621093750000000e+00 7.062148451805110305e-01 1.714285714285710138e-01 1.432407714843750000e+03 1.416138172149659979e+00 3.000000000000000000e+00 2.743670959472660229e+02 -9.825000000000000000e+01 5.825000000000000000e+01
2.300000000000000000e+01 4.767538461538459842e+02 3.405491638183589771e+02 -7.250854492187500000e+00 7.643154859542850010e-01 3.529411852359770063e-01 1.412084594726559999e+03 1.527974247932430085e+00 3.000000000000000000e+00 2.786691894531250000e+02 -9.725000000000000000e+01 5.825000000000000000e+01
1.900000000000000000e+01 4.836384615384610015e+02 3.258676452636719887e+02 -7.228851318359380329e+00 7.812466025352480248e-01 2.857142857142859829e-02 1.401610107421880002e+03 1.336615443229679956e+00 1.000000000000000000e+00 2.558912811279300001e+02 -9.675000000000000000e+01 5.825000000000000000e+01
1.700000000000000000e+01 4.883384615384620133e+02 3.294394226074219887e+02 -7.206817626953119671e+00 7.955338954925540440e-01 1.142857142857140046e-01 1.391135498046880002e+03 1.243093371391299939e+00 1.000000000000000000e+00 2.371748046875000000e+02 -9.625000000000000000e+01 5.825000000000000000e+01
1.400000000000000000e+01 4.940153846153839936e+02 3.346705627441410229e+02 -7.184814453125000000e+00 7.533912062644959606e-01 8.571428571428570120e-02 1.380660888671880002e+03 1.239164352416989967e+00 1.000000000000000000e+00 1.608556365966800001e+02 -9.575000000000000000e+01 5.825000000000000000e+01
1.300000000000000000e+01 5.006923076923080203e+02 3.398434448242189774e+02 -7.101318359375000000e+00 7.469299435615539551e-01 5.882352963089940157e-02 1.365154663085940001e+03 1.233907699584960049e+00 1.000000000000000000e+00 1.213580322265620026e+02 -9.525000000000000000e+01 5.825000000000000000e+01
1.100000000000000000e+01 5.003384615384620133e+02 3.439821777343750000e+02 -6.997344970703119671e+00 7.396224737167359509e-01 1.142857142857140046e-01 1.347971191406250000e+03 1.228657960891720080e+00 1.000000000000000000e+00 8.067201232910160513e+01 -9.475000000000000000e+01 5.825000000000000000e+01
1.100000000000000000e+01 5.067846153846149946e+02 3.458674926757810226e+02 -6.893371582031250000e+00 7.279773354530330032e-01 5.294117927551269531e-01 1.330787597656250000e+03 1.225243091583249955e+00 1.000000000000000000e+00 4.785131072998049717e+01 -9.425000000000000000e+01 5.825000000000000000e+01
1.100000000000000000e+01 4.979461538461540044e+02 3.464756774902339771e+02 -6.789398193359380329e+00 7.343179583549499512e-01 0.000000000000000000e+00 1.313604125976559999e+03 1.226297736167909935e+00 1.000000000000000000e+00 5.264616394042970171e+01 -9.375000000000000000e+01 5.825000000000000000e+01
1.300000000000000000e+01 5.803769230769230489e+02 3.624862365722660229e+02 -7.108489990234380329e+00 8.416341543197629615e-01 0.000000000000000000e+00 1.067582031250000000e+03 9.993839263916020066e-01 1.000000000000000000e+00 1.285092926025390057e+02 -7.675000000000000000e+01 5.825000000000000000e+01
1.400000000000000000e+01 5.981923076923079634e+02 3.618207397460939774e+02 -7.251220703125000000e+00 8.429519534111019619e-01 0.000000000000000000e+00 1.075756347656250000e+03 9.898654222488399990e-01 1.000000000000000000e+00 1.830498962402340055e+02 -7.625000000000000000e+01 5.825000000000000000e+01
1.000000000000000000e+00 6.190153846153849599e+02 3.545684204101560226e+02 -7.536651611328119671e+00 8.344597816467289597e-01 0.000000000000000000e+00 1.092104858398440001e+03 9.885360598564150170e-01 1.000000000000000000e+00 1.683203125000000000e+02 -7.525000000000000000e+01 5.825000000000000000e+01
9.000000000000000000e+00 6.283384615384610470e+02 3.503930358886719887e+02 -7.665985107421880329e+00 8.503240346908570446e-01 0.000000000000000000e+00 1.094892089843750000e+03 9.884228110313419968e-01 1.000000000000000000e+00 2.091840057373050001e+02 -7.475000000000000000e+01 5.825000000000000000e+01
2.000000000000000000e+00 6.379307692307689877e+02 3.468566284179689774e+02 -7.781921386718750000e+00 8.517006635665890224e-01 0.000000000000000000e+00 1.092291992187500000e+03 9.865288138389589623e-01 1.000000000000000000e+00 2.183224792480469887e+02 -7.425000000000000000e+01 5.825000000000000000e+01
3.000000000000000000e+00 6.364846153846150401e+02 3.459406738281250000e+02 -7.897857666015619671e+00 8.553360104560849830e-01 0.000000000000000000e+00 1.089692016601559999e+03 9.918560981750490502e-01 1.000000000000000000e+00 2.340933227539059942e+02 -7.375000000000000000e+01 5.825000000000000000e+01
4.000000000000000000e+00 6.378230769230769965e+02 3.451572570800780113e+02 -8.013793945312500000e+00 8.378705382347110264e-01 0.000000000000000000e+00 1.087092041015619998e+03 1.002239584922790083e+00 1.000000000000000000e+00 2.283166503906250000e+02 -7.325000000000000000e+01 5.825000000000000000e+01
2.000000000000000000e+00 6.293538461538460069e+02 3.332554626464839771e+02 -8.021606445312500000e+00 8.393393158912659802e-01 0.000000000000000000e+00 1.075923706054690001e+03 9.175959229469300427e-01 1.000000000000000000e+00 2.222808685302730112e+02 -7.275000000000000000e+01 5.825000000000000000e+01
2.000000000000000000e+00 6.342999999999999545e+02 3.293471374511719887e+02 -7.993316650390619671e+00 8.508619666099549450e-01 0.000000000000000000e+00 1.061899414062500000e+03 6.847196221351620204e-01 1.000000000000000000e+00 2.436670989990230112e+02 -7.225000000000000000e+01 5.825000000000000000e+01
8.000000000000000000e+00 6.348230769230769965e+02 3.309863586425780113e+02 -7.965057373046880329e+00 8.398922681808469459e-01 0.000000000000000000e+00 1.047875000000000000e+03 5.229907631874080032e-01 1.000000000000000000e+00 2.202840118408199999e+02 -7.175000000000000000e+01 5.825000000000000000e+01
4.000000000000000000e+00 6.360000000000000000e+02 3.376991882324219887e+02 -7.936798095703119671e+00 8.317531943321230248e-01 0.000000000000000000e+00 1.033850585937500000e+03 9.177876710891720302e-01 1.000000000000000000e+00 2.102079315185550001e+02 -7.125000000000000000e+01 5.825000000000000000e+01
7.000000000000000000e+00 6.358538461538460069e+02 3.440933227539060226e+02 -7.874176025390619671e+00 8.430687189102169521e-01 0.000000000000000000e+00 1.008744995117190001e+03 1.031439304351809971e+00 1.000000000000000000e+00 2.712677917480469887e+02 -7.075000000000000000e+01 5.825000000000000000e+01
9.000000000000000000e+00 6.244538461538460297e+02 3.508926696777339771e+02 -7.811584472656250000e+00 7.969705462455749512e-01 0.000000000000000000e+00 9.836394042968750000e+02 9.790941476821900524e-01 1.000000000000000000e+00 1.672048645019530113e+02 -7.025000000000000000e+01 5.825000000000000000e+01
6.000000000000000000e+00 6.264846153846150401e+02 3.597110595703119884e+02 -7.679840087890619671e+00 7.843855619430539772e-01 0.000000000000000000e+00 9.362366943359379547e+02 1.074969172477719948e+00 1.000000000000000000e+00 2.202781829833980112e+02 -6.925000000000000000e+01 5.825000000000000000e+01
2.000000000000000000e+00 6.171615384615380435e+02 3.620679321289060226e+02 -7.591217041015619671e+00 7.349168062210079677e-01 0.000000000000000000e+00 9.223649291992189774e+02 1.046243786811829946e+00 1.000000000000000000e+00 1.424410858154300001e+02 -6.875000000000000000e+01 5.825000000000000000e+01
8.000000000000000000e+00 7.065769230769229807e+02 2.903945007324219887e+02 -6.964721679687500000e+00 7.571965456008910023e-01 0.000000000000000000e+00 8.085963745117189774e+02 6.222917437553410203e-01 1.000000000000000000e+00 2.580671386718750000e+02 -6.575000000000000000e+01 5.825000000000000000e+01
6.000000000000000000e+00 7.825538461538460524e+02 1.912939910888669885e+02 -6.701416015625000000e+00 9.200986623764040306e-01 0.000000000000000000e+00 7.561495971679689774e+02 6.547117829322810501e-01 1.000000000000000000e+00 7.302781372070310226e+02 -6.475000000000000000e+01 5.825000000000000000e+01
1.000000000000000000e+00 7.933769230769230489e+02 1.501185455322269888e+02 -6.433502197265619671e+00 8.119012117385859817e-01 0.000000000000000000e+00 7.026667480468750000e+02 6.590232253074650437e-01 1.000000000000000000e+00 7.064328613281250000e+02 -6.375000000000000000e+01 5.825000000000000000e+01
1.000000000000000000e+01 7.795615384615380208e+02 1.426072540283199999e+02 -6.192077636718750000e+00 7.732964754104609817e-01 0.000000000000000000e+00 6.429718017578120453e+02 5.893237590789790481e-01 1.000000000000000000e+00 3.732927246093750000e+02 -6.325000000000000000e+01 5.825000000000000000e+01
2.400000000000000000e+01 4.126230769230770079e+02 3.076873474121089771e+02 -7.418273925781250000e+00 7.360563874244689941e-01 1.142857142857140046e-01 1.389708740234380002e+03 1.595520019531250000e+00 3.000000000000000000e+00 3.417160644531250000e+02 -9.975000000000000000e+01 5.875000000000000000e+01
2.000000000000000000e+01 4.159769230769230148e+02 2.999122619628910229e+02 -7.516967773437500000e+00 7.158634066581730515e-01 1.176470592617989974e-01 1.379600341796880002e+03 1.313924312591550070e+00 3.000000000000000000e+00 2.555708160400390057e+02 -9.925000000000000000e+01 5.875000000000000000e+01
3.900000000000000000e+01 4.221153846153840163e+02 3.030251770019530113e+02 -7.549926757812500000e+00 7.663652300834660203e-01 5.294117927551269531e-01 1.371507690429690001e+03 1.289463996887209918e+00 3.000000000000000000e+00 2.800173034667969887e+02 -9.875000000000000000e+01 5.875000000000000000e+01
1.800000000000000000e+01 4.334923076923079748e+02 3.287607421875000000e+02 -7.582916259765619671e+00 7.730506062507630505e-01 2.857142857142859829e-02 1.363415039062500000e+03 1.265640735626220037e+00 1.000000000000000000e+00 2.664277038574219887e+02 -9.825000000000000000e+01 5.875000000000000000e+01
1.500000000000000000e+01 4.443538461538460069e+02 3.563405456542969887e+02 -7.615875244140619671e+00 7.812902927398680530e-01 3.529411852359770063e-01 1.355322387695309999e+03 1.241827249526979982e+00 1.000000000000000000e+00 2.406524963378909945e+02 -9.775000000000000000e+01 5.875000000000000000e+01
1.600000000000000000e+01 4.536846153846149718e+02 3.694195251464839771e+02 -7.611938476562500000e+00 8.297439813613890491e-01 3.529411852359770063e-01 1.346742431640619998e+03 1.224807381629940073e+00 1.000000000000000000e+00 2.784633483886719887e+02 -9.725000000000000000e+01 5.875000000000000000e+01
1.900000000000000000e+01 4.566769230769230035e+02 3.582849426269530113e+02 -7.571105957031250000e+00 8.114103674888609730e-01 5.882353186607359730e-01 1.337675170898440001e+03 1.221194982528690076e+00 1.000000000000000000e+00 2.125424499511719887e+02 -9.675000000000000000e+01 5.875000000000000000e+01
1.600000000000000000e+01 4.589846153846149832e+02 3.468065490722660229e+02 -7.530273437500000000e+00 8.025409579277039684e-01 5.714285714285709944e-02 1.328607910156250000e+03 1.244909048080439895e+00 1.000000000000000000e+00 1.713022155761719887e+02 -9.625000000000000000e+01 5.875000000000000000e+01
1.000000000000000000e+01 4.634615384615390212e+02 3.498574218750000000e+02 -7.489440917968750000e+00 7.927920818328859642e-01 2.857142857142859829e-02 1.319540649414059999e+03 1.215701103210450107e+00 1.000000000000000000e+00 1.112412796020509944e+02 -9.575000000000000000e+01 5.875000000000000000e+01
1.200000000000000000e+01 4.679307692307689877e+02 3.529029541015619884e+02 -7.433044433593750000e+00 7.877133488655090332e-01 2.857142857142859829e-02 1.288679931640619998e+03 1.209077358245850053e+00 1.000000000000000000e+00 7.201416778564450283e+01 -9.525000000000000000e+01 5.875000000000000000e+01
8.000000000000000000e+00 5.228307692307689649e+02 3.619438476562500000e+02 -7.273712158203119671e+00 8.621365427970889561e-01 0.000000000000000000e+00 9.191732788085939774e+02 9.877595901489260033e-01 1.000000000000000000e+00 6.980851745605470171e+01 -7.775000000000000000e+01 5.875000000000000000e+01
7.000000000000000000e+00 5.837230769230769738e+02 3.513133544921880116e+02 -8.056915283203119671e+00 8.608537912368769973e-01 0.000000000000000000e+00 1.042174682617190001e+03 9.515888094902039684e-01 1.000000000000000000e+00 1.563141632080080115e+02 -7.525000000000000000e+01 5.875000000000000000e+01
4.000000000000000000e+00 5.888307692307689649e+02 3.447456665039060226e+02 -8.187286376953119671e+00 8.585017323493959740e-01 0.000000000000000000e+00 1.042491333007809999e+03 9.720791578292850010e-01 1.000000000000000000e+00 1.729338836669919885e+02 -7.475000000000000000e+01 5.875000000000000000e+01
1.000000000000000000e+00 5.994538461538460297e+02 3.315397644042969887e+02 -8.387634277343750000e+00 8.695172667503360264e-01 0.000000000000000000e+00 1.033902099609380002e+03 9.743518829345699794e-01 1.000000000000000000e+00 2.195033111572269888e+02 -7.375000000000000000e+01 5.875000000000000000e+01
2.000000000000000000e+00 5.986692307692310351e+02 3.180507202148439774e+02 -8.487823486328119671e+00 8.639644384384159714e-01 0.000000000000000000e+00 1.029607421875000000e+03 9.772980213165279872e-01 1.000000000000000000e+00 2.161501922607419885e+02 -7.325000000000000000e+01 5.875000000000000000e+01
4.000000000000000000e+00 5.930538461538460524e+02 3.019140930175780113e+02 -8.459106445312500000e+00 8.602637648582459606e-01 0.000000000000000000e+00 1.017737304687500000e+03 9.781803488731379836e-01 1.000000000000000000e+00 2.294773406982419885e+02 -7.275000000000000000e+01 5.875000000000000000e+01
7.000000000000000000e+00 5.936384615384620247e+02 3.046664428710939774e+02 -8.244110107421880329e+00 8.551501035690309838e-01 0.000000000000000000e+00 9.745515747070310226e+02 9.888445138931269973e-01 1.000000000000000000e+00 2.178552551269530113e+02 -7.125000000000000000e+01 5.875000000000000000e+01
1.000000000000000000e+00 5.889461538461539476e+02 3.147366943359380116e+02 -8.168823242187500000e+00 8.349283337593079724e-01 0.000000000000000000e+00 9.222470703125000000e+02 9.976063966751099743e-01 1.000000000000000000e+00 1.953657379150390057e+02 -7.075000000000000000e+01 5.875000000000000000e+01
2.000000000000000000e+00 5.761769230769230035e+02 3.405030517578119884e+02 -7.927795410156250000e+00 7.945289015769959606e-01 0.000000000000000000e+00 7.758303833007810226e+02 1.069098711013789949e+00 1.000000000000000000e+00 1.521201171875000000e+02 -6.925000000000000000e+01 5.875000000000000000e+01
1.000000000000000000e+00 7.809923076923080316e+02 1.739614868164059942e+02 -6.743438720703119671e+00 8.037995100021360084e-01 0.000000000000000000e+00 6.415651245117189774e+02 6.351510882377620071e-01 1.000000000000000000e+00 4.642193298339839771e+02 -6.475000000000000000e+01 5.875000000000000000e+01
1.000000000000000000e+00 8.044769230769229580e+02 1.486353149414059942e+02 -6.607360839843750000e+00 9.440476894378659889e-01 0.000000000000000000e+00 6.229329833984379547e+02 5.782564878463749558e-01 1.000000000000000000e+00 8.047982177734379547e+02 -6.425000000000000000e+01 5.875000000000000000e+01
2.000000000000000000e+00 8.351769230769240266e+02 1.350252075195309942e+02 -6.471313476562500000e+00 7.564336657524109997e-01 0.000000000000000000e+00 6.043009033203120453e+02 5.775622129440309838e-01 1.000000000000000000e+00 4.791610717773439774e+02 -6.375000000000000000e+01 5.875000000000000000e+01
2.100000000000000000e+01 4.120615384615389871e+02 3.228245544433589771e+02 -8.004180908203119671e+00 8.545417785644530140e-01 2.857142857142859829e-02 1.294422241210940001e+03 1.229814171791079991e+00 3.000000000000000000e+00 2.997434082031250000e+02 -9.825000000000000000e+01 5.925000000000000000e+01
1.600000000000000000e+01 4.254230769230770193e+02 3.517294616699219887e+02 -7.973022460937500000e+00 8.629454970359800026e-01 1.714285714285710138e-01 1.281400146484380002e+03 1.201303839683530050e+00 1.000000000000000000e+00 2.479955596923830115e+02 -9.725000000000000000e+01 5.925000000000000000e+01
1.700000000000000000e+01 4.297230769230769738e+02 3.522848205566410229e+02 -7.913360595703119671e+00 8.625352978706359863e-01 5.714285714285709944e-02 1.273740112304690001e+03 1.193856596946720083e+00 1.000000000000000000e+00 2.209287567138669885e+02 -9.675000000000000000e+01 5.925000000000000000e+01
1.600000000000000000e+01 4.336153846153849827e+02 3.474692687988280113e+02 -7.853698730468750000e+00 8.536284565925600365e-01 0.000000000000000000e+00 1.266080200195309999e+03 1.189223766326900078e+00 1.000000000000000000e+00 1.781876831054690058e+02 -9.625000000000000000e+01 5.925000000000000000e+01
1.600000000000000000e+01 4.373999999999999773e+02 3.506015930175780113e+02 -7.794036865234380329e+00 8.391416072845460095e-01 0.000000000000000000e+00 1.258420288085940001e+03 1.187731504440310060e+00 1.000000000000000000e+00 1.154014282226559942e+02 -9.575000000000000000e+01 5.925000000000000000e+01
1.500000000000000000e+01 4.355692307692310123e+02 3.552844848632810226e+02 -7.764770507812500000e+00 8.358792066574100010e-01 2.857142857142859829e-02 1.212205200195309999e+03 1.191305637359620029e+00 1.000000000000000000e+00 6.753710937500000000e+01 -9.525000000000000000e+01 5.925000000000000000e+01
9.000000000000000000e+00 5.092615384615389758e+02 3.618475646972660229e+02 -7.857849121093750000e+00 8.831725716590880237e-01 0.000000000000000000e+00 9.445876464843750000e+02 8.760915398597719506e-01 1.000000000000000000e+00 7.398331451416019888e+01 -7.725000000000000000e+01 5.925000000000000000e+01
7.000000000000000000e+00 5.295230769230770420e+02 3.605105590820310226e+02 -8.041931152343750000e+00 8.840703368186949573e-01 0.000000000000000000e+00 9.871988525390620453e+02 7.326176166534420497e-01 1.000000000000000000e+00 1.069027481079099999e+02 -7.675000000000000000e+01 5.925000000000000000e+01
2.000000000000000000e+00 5.364153846153840277e+02 3.570266113281250000e+02 -8.220367431640619671e+00 8.825507164001460403e-01 0.000000000000000000e+00 9.888807373046879547e+02 7.234508395195009545e-01 1.000000000000000000e+00 1.198220977783199999e+02 -7.625000000000000000e+01 5.925000000000000000e+01
7.000000000000000000e+00 5.394769230769239812e+02 3.505597534179689774e+02 -8.398773193359380329e+00 8.772416114807130016e-01 0.000000000000000000e+00 9.905625610351560226e+02 7.263973355293269485e-01 1.000000000000000000e+00 1.440204162597659945e+02 -7.575000000000000000e+01 5.925000000000000000e+01
3.000000000000000000e+00 5.438615384615389985e+02 3.416991882324219887e+02 -8.577209472656250000e+00 8.789879679679869495e-01 0.000000000000000000e+00 9.922444458007810226e+02 7.552538514137270287e-01 1.000000000000000000e+00 1.377985076904300001e+02 -7.525000000000000000e+01 5.925000000000000000e+01
2.000000000000000000e+00 5.461692307692310351e+02 3.302122497558589771e+02 -8.708618164062500000e+00 8.658378124237060547e-01 0.000000000000000000e+00 9.900906982421879547e+02 7.400870323181150123e-01 1.000000000000000000e+00 1.484582672119140057e+02 -7.475000000000000000e+01 5.925000000000000000e+01
3.000000000000000000e+00 5.511923076923079634e+02 3.173304748535160229e+02 -8.793029785156250000e+00 9.004983305931090198e-01 0.000000000000000000e+00 9.841014404296879547e+02 8.674294948577879749e-01 1.000000000000000000e+00 2.200731811523440058e+02 -7.425000000000000000e+01 5.925000000000000000e+01
1.000000000000000000e+00 5.540384615384620020e+02 3.033781127929689774e+02 -8.877441406250000000e+00 8.772822022438050427e-01 0.000000000000000000e+00 9.781121215820310226e+02 9.650304913520809658e-01 1.000000000000000000e+00 1.725852661132809942e+02 -7.375000000000000000e+01 5.925000000000000000e+01
9.000000000000000000e+00 5.526153846153849827e+02 2.843845825195310226e+02 -8.961853027343750000e+00 8.697474598884580299e-01 0.000000000000000000e+00 9.721228637695310226e+02 9.669535756111149460e-01 1.000000000000000000e+00 1.512196655273440058e+02 -7.325000000000000000e+01 5.925000000000000000e+01
5.000000000000000000e+00 5.596615384615380435e+02 2.602048645019530113e+02 -8.781555175781250000e+00 8.907994031906130150e-01 0.000000000000000000e+00 9.447847900390620453e+02 8.054287433624269799e-01 1.000000000000000000e+00 2.329594421386719887e+02 -7.225000000000000000e+01 5.925000000000000000e+01
5.000000000000000000e+00 5.614615384615379980e+02 2.570192565917969887e+02 -8.666503906250000000e+00 8.964883089065549537e-01 0.000000000000000000e+00 9.300186767578120453e+02 7.622281908988950416e-01 1.000000000000000000e+00 2.436838531494140057e+02 -7.175000000000000000e+01 5.925000000000000000e+01
1.300000000000000000e+01 5.577000000000000455e+02 2.601038513183589771e+02 -8.551422119140619671e+00 8.897414207458500535e-01 0.000000000000000000e+00 9.152525634765620453e+02 8.579046130180359997e-01 1.000000000000000000e+00 2.444125366210940058e+02 -7.125000000000000000e+01 5.925000000000000000e+01
2.000000000000000000e+00 5.598999999999999773e+02 2.682603149414060226e+02 -8.463439941406250000e+00 8.922569751739499733e-01 0.000000000000000000e+00 8.357491455078120453e+02 7.819635272026059791e-01 1.000000000000000000e+00 2.477858123779300001e+02 -7.075000000000000000e+01 5.925000000000000000e+01
1.000000000000000000e+01 5.502538461538459842e+02 2.774949035644530113e+02 -8.375488281250000000e+00 8.606322407722469814e-01 0.000000000000000000e+00 7.562457275390620453e+02 8.735691308975219727e-01 1.000000000000000000e+00 1.874528961181640057e+02 -7.025000000000000000e+01 5.925000000000000000e+01
8.000000000000000000e+00 5.324538461538460297e+02 2.863941650390619884e+02 -8.287506103515619671e+00 7.910482883453370251e-01 0.000000000000000000e+00 6.767423095703120453e+02 1.012790441513059969e+00 1.000000000000000000e+00 5.614495468139649859e+01 -6.975000000000000000e+01 5.925000000000000000e+01
9.000000000000000000e+00 7.525538461538460524e+02 1.578445281982419885e+02 -6.785461425781250000e+00 9.153401255607600540e-01 0.000000000000000000e+00 5.269805908203120453e+02 6.427252888679499954e-01 1.000000000000000000e+00 4.327893676757810226e+02 -6.475000000000000000e+01 5.925000000000000000e+01
1.000000000000000000e+01 7.823153846153850282e+02 1.368246459960940058e+02 -6.647277832031250000e+00 9.573660492897030361e-01 0.000000000000000000e+00 5.164578247070310226e+02 6.152887344360350452e-01 1.000000000000000000e+00 4.314931945800780113e+02 -6.425000000000000000e+01 5.925000000000000000e+01
3.400000000000000000e+01 3.722461538461540158e+02 2.492139587402340055e+02 -8.435180664062500000e+00 8.524813652038569778e-01 2.857142857142859829e-02 1.242861206054690001e+03 1.204640388488769975e+00 3.000000000000000000e+00 3.128058471679689774e+02 -9.975000000000000000e+01 5.975000000000000000e+01
1.300000000000000000e+01 3.871461538461539931e+02 2.722449645996089771e+02 -8.425476074218750000e+00 8.995563983917239659e-01 2.857142857142859829e-02 1.225429443359380002e+03 1.196800708770749955e+00 1.000000000000000000e+00 3.176500549316410229e+02 -9.825000000000000000e+01 5.975000000000000000e+01
1.800000000000000000e+01 4.073846153846150173e+02 3.087551574707030113e+02 -8.334106445312500000e+00 8.990881443023680530e-01 0.000000000000000000e+00 1.216057861328119998e+03 1.168693065643310103e+00 1.000000000000000000e+00 2.519509429931640057e+02 -9.725000000000000000e+01 5.975000000000000000e+01
2.100000000000000000e+01 4.076999999999999886e+02 3.172451782226560226e+02 -8.255615234375000000e+00 8.907337188720699794e-01 2.857142857142859829e-02 1.209805175781250000e+03 1.159581303596499913e+00 3.000000000000000000e+00 1.959218597412109943e+02 -9.675000000000000000e+01 5.975000000000000000e+01
1.000000000000000000e+01 4.124846153846149832e+02 3.244620056152339771e+02 -8.177124023437500000e+00 8.954099416732790306e-01 0.000000000000000000e+00 1.203552612304690001e+03 1.153686165809630015e+00 1.000000000000000000e+00 1.738996124267580115e+02 -9.625000000000000000e+01 5.975000000000000000e+01
1.900000000000000000e+01 4.109076923076920025e+02 3.328773193359380116e+02 -8.098632812500000000e+00 8.859160542488100365e-01 0.000000000000000000e+00 1.197300048828119998e+03 1.151965379714970039e+00 1.000000000000000000e+00 1.159417266845699999e+02 -9.575000000000000000e+01 5.975000000000000000e+01
1.900000000000000000e+01 4.084384615384619792e+02 3.411221923828119884e+02 -8.096496582031250000e+00 8.793447017669679955e-01 0.000000000000000000e+00 1.135730590820309999e+03 1.158854126930239925e+00 1.000000000000000000e+00 7.050101470947269888e+01 -9.525000000000000000e+01 5.975000000000000000e+01
1.000000000000000000e+00 4.902384615384619906e+02 3.563610229492189774e+02 -8.292633056640619671e+00 8.907043933868410424e-01 0.000000000000000000e+00 9.088676147460939774e+02 7.219622731208800159e-01 1.000000000000000000e+00 3.817345046997070312e+01 -7.725000000000000000e+01 5.975000000000000000e+01
1.000000000000000000e+00 5.070769230769229807e+02 3.535330200195310226e+02 -8.508666992187500000e+00 9.129576086997990281e-01 0.000000000000000000e+00 9.470072631835939774e+02 7.091060280799870164e-01 1.000000000000000000e+00 1.094699630737299998e+02 -7.675000000000000000e+01 5.975000000000000000e+01
3.000000000000000000e+00 5.139923076923080316e+02 3.479279479980469887e+02 -8.704925537109380329e+00 9.078615903854370117e-01 0.000000000000000000e+00 9.454429321289060226e+02 7.037653923034670189e-01 1.000000000000000000e+00 1.160218200683590055e+02 -7.625000000000000000e+01 5.975000000000000000e+01
2.000000000000000000e+00 5.180923076923070312e+02 3.387710876464839771e+02 -8.901184082031250000e+00 9.099771380424499512e-01 0.000000000000000000e+00 9.438785400390620453e+02 7.048624753952029698e-01 1.000000000000000000e+00 1.543742523193359943e+02 -7.575000000000000000e+01 5.975000000000000000e+01
0.000000000000000000e+00 5.215538461538460524e+02 3.257198486328119884e+02 -9.097473144531250000e+00 9.044165611267089844e-01 0.000000000000000000e+00 9.423142089843750000e+02 7.079485058784480422e-01 1.000000000000000000e+00 1.530891113281250000e+02 -7.525000000000000000e+01 5.975000000000000000e+01
2.000000000000000000e+00 5.341384615384620247e+02 2.403454132080080115e+02 -9.435852050781250000e+00 9.259156584739689499e-01 0.000000000000000000e+00 9.146382446289060226e+02 7.529543638229370117e-01 1.000000000000000000e+00 2.277849731445309942e+02 -7.325000000000000000e+01 5.975000000000000000e+01
3.000000000000000000e+00 5.218230769230769965e+02 2.275496673583980112e+02 -9.334167480468750000e+00 9.012376070022579677e-01 0.000000000000000000e+00 9.013645019531250000e+02 8.038607239723210007e-01 1.000000000000000000e+00 2.013024902343750000e+02 -7.275000000000000000e+01 5.975000000000000000e+01
1.500000000000000000e+01 5.249615384615390212e+02 2.154606170654300001e+02 -9.175689697265619671e+00 9.293516278266910069e-01 0.000000000000000000e+00 8.862275390625000000e+02 7.045484781265259899e-01 1.000000000000000000e+00 2.632613220214839771e+02 -7.225000000000000000e+01 5.975000000000000000e+01
3.000000000000000000e+00 5.261230769230769511e+02 2.120823974609380116e+02 -9.017211914062500000e+00 9.057322144508359596e-01 0.000000000000000000e+00 8.710905761718750000e+02 7.023028135299680397e-01 1.000000000000000000e+00 2.000536651611330115e+02 -7.175000000000000000e+01 5.975000000000000000e+01
2.000000000000000000e+00 5.262538461538459842e+02 2.128694000244140057e+02 -8.858734130859380329e+00 9.058945775032040126e-01 0.000000000000000000e+00 8.559535522460939774e+02 7.794571518898010254e-01 1.000000000000000000e+00 2.092599487304690058e+02 -7.125000000000000000e+01 5.975000000000000000e+01
5.000000000000000000e+00 5.174461538461539476e+02 2.161919097900390057e+02 -8.758087158203119671e+00 8.894676566123960182e-01 0.000000000000000000e+00 7.492512207031250000e+02 7.151114344596859462e-01 1.000000000000000000e+00 1.711533203125000000e+02 -7.075000000000000000e+01 5.975000000000000000e+01
6.000000000000000000e+00 5.164615384615379980e+02 2.218251037597659945e+02 -8.657440185546880329e+00 8.789837956428530052e-01 0.000000000000000000e+00 6.425488891601560226e+02 8.718790411949159935e-01 1.000000000000000000e+00 1.417284698486330115e+02 -7.025000000000000000e+01 5.975000000000000000e+01
9.000000000000000000e+00 7.075000000000000000e+02 1.434066009521480112e+02 -6.827514648437500000e+00 8.711231946945190430e-01 0.000000000000000000e+00 4.123960876464839771e+02 6.488906741142269619e-01 1.000000000000000000e+00 2.165248870849609943e+02 -6.475000000000000000e+01 5.975000000000000000e+01
9.000000000000000000e+00 3.611923076923080203e+02 2.310338592529300001e+02 -9.028503417968750000e+00 9.079027175903320312e-01 2.857142857142859829e-02 1.175383544921880002e+03 9.099647402763370030e-01 1.000000000000000000e+00 2.871124877929689774e+02 -9.925000000000000000e+01 6.025000000000000000e+01
8.000000000000000000e+00 3.649230769230770193e+02 2.363700714111330115e+02 -8.971618652343750000e+00 9.184125065803530052e-01 0.000000000000000000e+00 1.173083984375000000e+03 8.996401429176329456e-01 1.000000000000000000e+00 2.964328613281250000e+02 -9.875000000000000000e+01 6.025000000000000000e+01
1.500000000000000000e+01 3.676538461538460183e+02 2.487026977539059942e+02 -8.914703369140619671e+00 9.196573495864870385e-01 0.000000000000000000e+00 1.170784423828119998e+03 9.968387484550480515e-01 1.000000000000000000e+00 2.786199645996089771e+02 -9.825000000000000000e+01 6.025000000000000000e+01
1.500000000000000000e+01 3.701769230769230035e+02 2.646058959960939774e+02 -8.857818603515619671e+00 9.101607799530030407e-01 0.000000000000000000e+00 1.168484741210940001e+03 1.165746569633479890e+00 1.000000000000000000e+00 2.064520263671880116e+02 -9.775000000000000000e+01 6.025000000000000000e+01
1.100000000000000000e+01 3.714461538461540044e+02 2.791310119628910229e+02 -8.785675048828119671e+00 9.046074748039250046e-01 2.857142857142859829e-02 1.164565551757809999e+03 1.159370899200439897e+00 1.000000000000000000e+00 1.580728607177730112e+02 -9.725000000000000000e+01 6.025000000000000000e+01
9.000000000000000000e+00 3.867230769230769738e+02 3.146377258300780113e+02 -8.523559570312500000e+00 9.120739102363589756e-01 0.000000000000000000e+00 1.147948974609380002e+03 1.129336357116700107e+00 1.000000000000000000e+00 9.518626403808589487e+01 -9.575000000000000000e+01 6.025000000000000000e+01
6.000000000000000000e+00 4.955076923076920252e+02 3.407890930175780113e+02 -9.031005859375000000e+00 9.168376922607419655e-01 0.000000000000000000e+00 8.953015136718750000e+02 6.948735713958740234e-01 1.000000000000000000e+00 4.185415267944340201e+01 -7.675000000000000000e+01 6.025000000000000000e+01
3.000000000000000000e+00 5.027923076923079861e+02 3.186157531738280113e+02 -9.436187744140619671e+00 9.316000938415529564e-01 0.000000000000000000e+00 8.868742675781250000e+02 6.847957968711849697e-01 1.000000000000000000e+00 1.537046661376949999e+02 -7.575000000000000000e+01 6.025000000000000000e+01
1.000000000000000000e+00 5.022692307692310010e+02 3.005911560058589771e+02 -9.638763427734380329e+00 9.307314753532409668e-01 0.000000000000000000e+00 8.826606445312500000e+02 6.778691411018370472e-01 1.000000000000000000e+00 1.468100738525390057e+02 -7.525000000000000000e+01 6.025000000000000000e+01
1.000000000000000000e+01 5.122461538461540158e+02 2.774055786132810226e+02 -9.740173339843750000e+00 9.477792978286739833e-01 0.000000000000000000e+00 8.775868530273439774e+02 6.621242165565489612e-01 1.000000000000000000e+00 2.192637634277340055e+02 -7.475000000000000000e+01 6.025000000000000000e+01
1.000000000000000000e+00 5.136923076923079634e+02 2.206556091308590055e+02 -9.740600585937500000e+00 9.412844777107239880e-01 0.000000000000000000e+00 8.657189941406250000e+02 6.560006737709049851e-01 1.000000000000000000e+00 2.097080688476559942e+02 -7.375000000000000000e+01 6.025000000000000000e+01
4.000000000000000000e+00 5.139769230769229580e+02 1.972031707763669885e+02 -9.740844726562500000e+00 9.527059197425840065e-01 0.000000000000000000e+00 8.597850341796879547e+02 6.552898287773130104e-01 1.000000000000000000e+00 2.690091857910160229e+02 -7.325000000000000000e+01 6.025000000000000000e+01
2.000000000000000000e+00 5.070384615384609788e+02 1.852625274658199999e+02 -9.626373291015619671e+00 9.294567108154300206e-01 0.000000000000000000e+00 8.377058105468750000e+02 6.599713563919069603e-01 1.000000000000000000e+00 1.805874328613280113e+02 -7.275000000000000000e+01 6.025000000000000000e+01
2.000000000000000000e+00 5.005846153846150060e+02 1.743367767333980112e+02 -9.473693847656250000e+00 9.315778017044069603e-01 0.000000000000000000e+00 8.102448730468750000e+02 6.704788804054260254e-01 1.000000000000000000e+00 2.199779052734380116e+02 -7.225000000000000000e+01 6.025000000000000000e+01
7.000000000000000000e+00 4.960846153846150060e+02 1.712310791015619884e+02 -9.320983886718750000e+00 9.082038998603819691e-01 0.000000000000000000e+00 7.827838745117189774e+02 6.711744070053099476e-01 1.000000000000000000e+00 1.436017456054690058e+02 -7.175000000000000000e+01 6.025000000000000000e+01
9.000000000000000000e+00 4.929769230769230148e+02 1.709663391113280113e+02 -9.168304443359380329e+00 9.181748628616329677e-01 0.000000000000000000e+00 7.553229370117189774e+02 6.664223074913020461e-01 1.000000000000000000e+00 1.891547851562500000e+02 -7.125000000000000000e+01 6.025000000000000000e+01
2.000000000000000000e+00 3.339615384615379980e+02 2.317886352539059942e+02 -9.570404052734380329e+00 9.498723745346070446e-01 0.000000000000000000e+00 1.135984375000000000e+03 8.924933075904849522e-01 1.000000000000000000e+00 3.342958984375000000e+02 -9.975000000000000000e+01 6.075000000000000000e+01
1.300000000000000000e+01 3.481846153846149718e+02 2.370810394287109943e+02 -9.538665771484380329e+00 9.394873380661009632e-01 0.000000000000000000e+00 1.130862426757809999e+03 1.007261276245120074e+00 1.000000000000000000e+00 2.728189697265619884e+02 -9.875000000000000000e+01 6.075000000000000000e+01
1.400000000000000000e+01 3.533076923076919797e+02 2.518653106689449999e+02 -9.326721191406250000e+00 9.392645359039309971e-01 0.000000000000000000e+00 1.126769042968750000e+03 1.135020375251770020e+00 1.000000000000000000e+00 1.721869201660159945e+02 -9.725000000000000000e+01 6.075000000000000000e+01
8.000000000000000000e+00 3.605846153846150060e+02 2.614401855468750000e+02 -9.240295410156250000e+00 9.410665631294250488e-01 0.000000000000000000e+00 1.121258056640619998e+03 1.122920393943789952e+00 1.000000000000000000e+00 1.539809570312500000e+02 -9.675000000000000000e+01 6.075000000000000000e+01
1.100000000000000000e+01 3.657307692307689990e+02 2.710796203613280113e+02 -9.153869628906250000e+00 9.422203302383419521e-01 0.000000000000000000e+00 1.115746948242190001e+03 1.107884764671329902e+00 1.000000000000000000e+00 1.224634628295900001e+02 -9.625000000000000000e+01 6.075000000000000000e+01
6.000000000000000000e+00 3.661769230769230035e+02 2.810213012695310226e+02 -9.067443847656250000e+00 9.371404647827149548e-01 0.000000000000000000e+00 1.110235961914059999e+03 1.097368836402889958e+00 1.000000000000000000e+00 9.673062133789059658e+01 -9.575000000000000000e+01 6.075000000000000000e+01
9.000000000000000000e+00 3.578230769230769965e+02 2.881872863769530113e+02 -9.051788330078119671e+00 9.374214410781860352e-01 0.000000000000000000e+00 1.064428588867190001e+03 1.092656731605530007e+00 1.000000000000000000e+00 5.212133407592769885e+01 -9.525000000000000000e+01 6.075000000000000000e+01
1.100000000000000000e+01 4.789846153846149832e+02 3.297016601562500000e+02 -9.345611572265619671e+00 9.340439438819889695e-01 0.000000000000000000e+00 8.023585815429689774e+02 6.850512623786929600e-01 1.000000000000000000e+00 2.771309661865230112e+01 -7.725000000000000000e+01 6.075000000000000000e+01
6.000000000000000000e+00 4.883461538461539817e+02 3.240199890136719887e+02 -9.608306884765619671e+00 9.454435706138609730e-01 0.000000000000000000e+00 8.322097167968750000e+02 6.714853644371030494e-01 1.000000000000000000e+00 1.146541519165040057e+02 -7.675000000000000000e+01 6.075000000000000000e+01
2.000000000000000000e+00 4.907615384615380094e+02 3.130156250000000000e+02 -9.805816650390619671e+00 9.511873722076420457e-01 0.000000000000000000e+00 8.259371948242189774e+02 6.576474905014040306e-01 1.000000000000000000e+00 1.624010925292969887e+02 -7.625000000000000000e+01 6.075000000000000000e+01
0.000000000000000000e+00 4.989153846153849940e+02 2.949706115722660229e+02 -1.000335693359379974e+01 9.538940787315369763e-01 0.000000000000000000e+00 8.196646118164060226e+02 6.449723839759829991e-01 1.000000000000000000e+00 1.644809417724609943e+02 -7.575000000000000000e+01 6.075000000000000000e+01
5.000000000000000000e+00 5.046076923076919911e+02 2.378188629150390057e+02 -1.023947143554689987e+01 9.601421356201169655e-01 0.000000000000000000e+00 8.098669433593750000e+02 6.211616396903989479e-01 1.000000000000000000e+00 2.616252441406250000e+02 -7.475000000000000000e+01 6.075000000000000000e+01
8.000000000000000000e+00 5.072230769230769738e+02 2.068632812500000000e+02 -1.011920166015620026e+01 9.676154851913449928e-01 0.000000000000000000e+00 8.090892944335939774e+02 6.138157248497010388e-01 1.000000000000000000e+00 3.039759826660160229e+02 -7.425000000000000000e+01 6.075000000000000000e+01
2.000000000000000000e+00 5.015000000000000000e+02 1.773403015136719887e+02 -9.998931884765619671e+00 9.674398899078370251e-01 0.000000000000000000e+00 8.083115844726560226e+02 6.071472764015199974e-01 1.000000000000000000e+00 3.072793579101560226e+02 -7.375000000000000000e+01 6.075000000000000000e+01
1.000000000000000000e+00 5.118384615384620133e+02 1.571071014404300001e+02 -9.878662109375000000e+00 9.718317389488220215e-01 0.000000000000000000e+00 8.075339355468750000e+02 5.930888056755070359e-01 1.000000000000000000e+00 3.343541259765619884e+02 -7.325000000000000000e+01 6.075000000000000000e+01
1.000000000000000000e+00 5.070692307692310123e+02 1.491295623779300001e+02 -9.774902343750000000e+00 9.663316011428829677e-01 0.000000000000000000e+00 7.686358032226560226e+02 5.926620960235600144e-01 1.000000000000000000e+00 3.145113220214839771e+02 -7.275000000000000000e+01 6.075000000000000000e+01
1.000000000000000000e+00 5.010461538461540272e+02 1.434151916503909945e+02 -9.676635742187500000e+00 9.662674665451049805e-01 0.000000000000000000e+00 7.170308837890620453e+02 5.973147153854370117e-01 1.000000000000000000e+00 3.256410522460939774e+02 -7.225000000000000000e+01 6.075000000000000000e+01
3.000000000000000000e+00 4.879846153846149832e+02 1.389782867431640057e+02 -9.480133056640619671e+00 9.628269076347349964e-01 0.000000000000000000e+00 6.138209838867189774e+02 6.004561185836789772e-01 1.000000000000000000e+00 3.465426025390619884e+02 -7.125000000000000000e+01 6.075000000000000000e+01
0.000000000000000000e+00 4.800538461538459956e+02 1.379164581298830115e+02 -9.288116455078119671e+00 9.581650495529170364e-01 0.000000000000000000e+00 5.432882690429689774e+02 6.069548130035400391e-01 1.000000000000000000e+00 3.101332702636719887e+02 -7.075000000000000000e+01 6.075000000000000000e+01
1.100000000000000000e+01 3.287153846153850054e+02 2.313594970703119884e+02 -1.018377685546879974e+01 9.606368541717530407e-01 0.000000000000000000e+00 1.087411376953119998e+03 1.088151931762699975e+00 1.000000000000000000e+00 2.958907165527339771e+02 -9.925000000000000000e+01 6.125000000000000000e+01
1.500000000000000000e+01 3.341923076923080203e+02 2.279950256347659945e+02 -9.949554443359380329e+00 9.591773152351380505e-01 0.000000000000000000e+00 1.091099487304690001e+03 1.111696600913999911e+00 1.000000000000000000e+00 1.906483459472659945e+02 -9.775000000000000000e+01 6.125000000000000000e+01
1.100000000000000000e+01 3.434769230769230148e+02 2.254049835205080115e+02 -9.782287597656250000e+00 9.641082882881160110e-01 0.000000000000000000e+00 1.083489379882809999e+03 1.093860864639280006e+00 1.000000000000000000e+00 1.717577972412109943e+02 -9.675000000000000000e+01 6.125000000000000000e+01
1.200000000000000000e+01 3.451461538461539931e+02 2.294841308593750000e+02 -9.611358642578119671e+00 9.632191061973569557e-01 0.000000000000000000e+00 1.072522949218750000e+03 1.070580363273619939e+00 1.000000000000000000e+00 1.174882736206049998e+02 -9.575000000000000000e+01 6.125000000000000000e+01
1.300000000000000000e+01 3.453692307692310237e+02 2.335024108886719887e+02 -9.577697753906250000e+00 9.629565477371220261e-01 0.000000000000000000e+00 1.042284179687500000e+03 1.058423161506649945e+00 1.000000000000000000e+00 7.647672271728519888e+01 -9.525000000000000000e+01 6.125000000000000000e+01
[truncated: 135,901 more chars]
