# Supplementary material for: Environmental Conditions for Alternative Tree Cover States in HighLatitudes
Source: Copernicus journal article supplement (doi:10.5194/bg-2016-401), 2016-10-11
Supplement: Supplementary file 4 [file bg-2016-401-supplement.zip › Analysis/files_to_load_and_import/boreal_na_east_nofire_database.txt]

4.000000000000000000e+00 5.469692307692307622e+02 2.696683959960937500e+02 4.655456542968750000e+00 0.000000000000000000e+00 0.000000000000000000e+00 3.319161132812500000e+03 3.937541961669921875e+00 1.000000000000000000e+00 5.045122680664062500e+02 -9.925000000000000000e+01 4.525000000000000000e+01
6.300000000000000000e+01 7.743615384615380890e+02 3.431378784179687500e+02 3.908905029296875000e+00 0.000000000000000000e+00 0.000000000000000000e+00 3.129231445312500000e+03 3.970267772674560547e+00 4.000000000000000000e+00 2.857077331542968750e+02 -9.275000000000000000e+01 4.525000000000000000e+01
5.800000000000000000e+01 7.926076923076926732e+02 3.855066223144531250e+02 4.164611816406250000e+00 0.000000000000000000e+00 0.000000000000000000e+00 3.121708740234375000e+03 3.830453872680664062e+00 4.000000000000000000e+00 3.564528503417968750e+02 -9.125000000000000000e+01 4.525000000000000000e+01
4.900000000000000000e+01 7.869846153846154948e+02 4.076825256347656250e+02 4.352508544921875000e+00 0.000000000000000000e+00 0.000000000000000000e+00 3.126727050781250000e+03 3.089573383331298828e+00 4.000000000000000000e+00 3.954749450683593750e+02 -9.075000000000000000e+01 4.525000000000000000e+01
2.900000000000000000e+01 8.114384615384614108e+02 3.798137207031250000e+02 4.540374755859375000e+00 0.000000000000000000e+00 0.000000000000000000e+00 3.131396728515625000e+03 2.515947341918945312e+00 3.000000000000000000e+00 4.708270568847656250e+02 -9.025000000000000000e+01 4.525000000000000000e+01
5.700000000000000000e+01 8.001538461538461888e+02 3.764568786621093750e+02 4.750457763671875000e+00 0.000000000000000000e+00 0.000000000000000000e+00 3.019171386718750000e+03 3.596126317977905273e+00 4.000000000000000000e+00 4.281541442871093750e+02 -8.975000000000000000e+01 4.525000000000000000e+01
5.400000000000000000e+01 7.713999999999997499e+02 3.666658630371093750e+02 4.982727050781250000e+00 0.000000000000000000e+00 0.000000000000000000e+00 3.007521240234375000e+03 3.567088603973388672e+00 4.000000000000000000e+00 4.698607482910156250e+02 -8.925000000000000000e+01 4.525000000000000000e+01
6.000000000000000000e+01 7.464153846153842551e+02 3.977831420898437500e+02 5.215026855468750000e+00 0.000000000000000000e+00 0.000000000000000000e+00 2.991324707031250000e+03 3.337230920791625977e+00 4.000000000000000000e+00 4.423210144042968750e+02 -8.875000000000000000e+01 4.525000000000000000e+01
5.600000000000000000e+01 7.732615384615387484e+02 4.053438110351562500e+02 5.447296142578125000e+00 0.000000000000000000e+00 0.000000000000000000e+00 2.970255859375000000e+03 3.600231170654296875e+00 4.000000000000000000e+00 2.781997070312500000e+02 -8.825000000000000000e+01 4.525000000000000000e+01
5.300000000000000000e+01 7.809307692307688740e+02 3.964680175781250000e+02 5.494354248046875000e+00 0.000000000000000000e+00 0.000000000000000000e+00 2.918769775390625000e+03 3.755231857299804688e+00 4.000000000000000000e+00 2.068406524658203125e+02 -8.775000000000000000e+01 4.525000000000000000e+01
2.500000000000000000e+01 8.282461538461537884e+02 4.094894409179687500e+02 4.965698242187500000e+00 0.000000000000000000e+00 0.000000000000000000e+00 2.729503662109375000e+03 9.606044292449951172e-01 3.000000000000000000e+00 2.503367614746093750e+02 -8.425000000000000000e+01 4.525000000000000000e+01
6.900000000000000000e+01 1.086284615384615336e+03 3.840179748535156250e+02 3.721343994140625000e+00 0.000000000000000000e+00 0.000000000000000000e+00 2.717351074218750000e+03 9.614879488945007324e-01 4.000000000000000000e+00 2.606470031738281250e+02 -7.975000000000000000e+01 4.525000000000000000e+01
5.600000000000000000e+01 1.018969230769230535e+03 3.397614135742187500e+02 3.503753662109375000e+00 0.000000000000000000e+00 0.000000000000000000e+00 2.712248046875000000e+03 9.450535774230957031e-01 4.000000000000000000e+00 3.092456970214843750e+02 -7.925000000000000000e+01 4.525000000000000000e+01
6.700000000000000000e+01 9.966153846153846416e+02 3.889110412597656250e+02 3.216308593750000000e+00 0.000000000000000000e+00 0.000000000000000000e+00 2.661257812500000000e+03 9.163748621940612793e-01 4.000000000000000000e+00 4.441153259277343750e+02 -7.825000000000000000e+01 4.525000000000000000e+01
5.900000000000000000e+01 8.734846153846151537e+02 4.055255737304687500e+02 3.146484375000000000e+00 0.000000000000000000e+00 0.000000000000000000e+00 2.655050292968750000e+03 9.268832206726074219e-01 4.000000000000000000e+00 3.429736633300781250e+02 -7.775000000000000000e+01 4.525000000000000000e+01
6.600000000000000000e+01 8.759692307692307622e+02 3.794761352539062500e+02 3.076629638671875000e+00 0.000000000000000000e+00 0.000000000000000000e+00 2.648684570312500000e+03 9.418959021568298340e-01 4.000000000000000000e+00 3.086385498046875000e+02 -7.725000000000000000e+01 4.525000000000000000e+01
1.400000000000000000e+01 8.058384615384616154e+02 4.213399047851562500e+02 2.866485595703125000e+00 0.000000000000000000e+00 0.000000000000000000e+00 2.587696533203125000e+03 9.722930788993835449e-01 2.000000000000000000e+00 1.203653717041015625e+02 -7.625000000000000000e+01 4.525000000000000000e+01
1.400000000000000000e+01 9.248384615384613880e+02 4.829685974121093750e+02 2.740264892578125000e+00 0.000000000000000000e+00 0.000000000000000000e+00 2.579760253906250000e+03 1.429997086524963379e+00 2.000000000000000000e+00 9.532123565673828125e+01 -7.575000000000000000e+01 4.525000000000000000e+01
7.100000000000000000e+01 1.194061538461538021e+03 5.882686157226562500e+02 2.162841796875000000e+00 0.000000000000000000e+00 0.000000000000000000e+00 2.459522949218750000e+03 9.345657229423522949e-01 4.000000000000000000e+00 2.760216064453125000e+02 -7.225000000000000000e+01 4.525000000000000000e+01
4.000000000000000000e+01 1.216700000000000045e+03 5.370006713867187500e+02 2.155487060546875000e+00 0.000000000000000000e+00 0.000000000000000000e+00 2.456590820312500000e+03 9.169288277626037598e-01 3.000000000000000000e+00 3.017593383789062500e+02 -7.175000000000000000e+01 4.525000000000000000e+01
6.700000000000000000e+01 1.350184615384615199e+03 5.436701049804687500e+02 2.148101806640625000e+00 0.000000000000000000e+00 0.000000000000000000e+00 2.454624267578125000e+03 8.948280215263366699e-01 4.000000000000000000e+00 6.895606079101562500e+02 -7.125000000000000000e+01 4.525000000000000000e+01
6.600000000000000000e+01 1.358453846153846371e+03 5.435772705078125000e+02 2.265899658203125000e+00 0.000000000000000000e+00 0.000000000000000000e+00 2.464870605468750000e+03 8.719891309738159180e-01 4.000000000000000000e+00 7.850031127929687500e+02 -7.075000000000000000e+01 4.525000000000000000e+01
4.600000000000000000e+01 1.324423076923075996e+03 5.447482299804687500e+02 2.383666992187500000e+00 0.000000000000000000e+00 0.000000000000000000e+00 2.468903076171875000e+03 8.708035349845886230e-01 4.000000000000000000e+00 3.980151672363281250e+02 -7.025000000000000000e+01 4.525000000000000000e+01
6.000000000000000000e+01 1.257876923076922822e+03 5.699851684570312500e+02 2.642333984375000000e+00 0.000000000000000000e+00 0.000000000000000000e+00 2.526920166015625000e+03 8.966609239578247070e-01 4.000000000000000000e+00 1.707548370361328125e+02 -6.925000000000000000e+01 4.525000000000000000e+01
5.600000000000000000e+01 1.142269230769230717e+03 5.576562500000000000e+02 2.852600097656250000e+00 0.000000000000000000e+00 0.000000000000000000e+00 2.537119873046875000e+03 9.199827909469604492e-01 4.000000000000000000e+00 9.235324096679687500e+01 -6.875000000000000000e+01 4.525000000000000000e+01
6.300000000000000000e+01 1.204276923076922458e+03 5.690910034179687500e+02 3.062866210937500000e+00 0.000000000000000000e+00 0.000000000000000000e+00 2.548357666015625000e+03 9.193690419197082520e-01 4.000000000000000000e+00 9.380888366699218750e+01 -6.825000000000000000e+01 4.525000000000000000e+01
6.200000000000000000e+01 1.289069230769230899e+03 5.843118286132812500e+02 3.273132324218750000e+00 0.000000000000000000e+00 0.000000000000000000e+00 2.559870361328125000e+03 1.374963521957397461e+00 4.000000000000000000e+00 1.009424133300781250e+02 -6.775000000000000000e+01 4.525000000000000000e+01
6.400000000000000000e+01 1.369376923076922822e+03 5.764167480468750000e+02 3.528778076171875000e+00 0.000000000000000000e+00 0.000000000000000000e+00 2.586782714843750000e+03 2.262581348419189453e+00 4.000000000000000000e+00 9.084842681884765625e+01 -6.725000000000000000e+01 4.525000000000000000e+01
3.400000000000000000e+01 1.241907692307691377e+03 5.323687133789062500e+02 5.638488769531250000e+00 0.000000000000000000e+00 0.000000000000000000e+00 2.561031005859375000e+03 1.991263747215270996e+00 3.000000000000000000e+00 7.335133361816406250e+01 -6.325000000000000000e+01 4.525000000000000000e+01
4.100000000000000000e+01 1.377430769230769101e+03 5.069645080566406250e+02 5.875183105468750000e+00 0.000000000000000000e+00 0.000000000000000000e+00 2.554607177734375000e+03 2.198659420013427734e+00 3.000000000000000000e+00 2.026185760498046875e+02 -6.275000000000000000e+01 4.525000000000000000e+01
4.000000000000000000e+00 4.858384615384615586e+02 2.338948974609375000e+02 4.350097656250000000e+00 0.000000000000000000e+00 0.000000000000000000e+00 3.336635986328125000e+03 3.883026599884033203e+00 1.000000000000000000e+00 5.648046264648437500e+02 -9.975000000000000000e+01 4.575000000000000000e+01
6.000000000000000000e+00 5.261384615384615699e+02 2.595296325683593750e+02 4.365753173828125000e+00 0.000000000000000000e+00 0.000000000000000000e+00 3.323647216796875000e+03 3.879936933517456055e+00 1.000000000000000000e+00 5.911144409179687500e+02 -9.925000000000000000e+01 4.575000000000000000e+01
4.000000000000000000e+01 7.591461538461539931e+02 3.280381469726562500e+02 3.474639892578125000e+00 0.000000000000000000e+00 0.000000000000000000e+00 3.122530517578125000e+03 3.891089677810668945e+00 3.000000000000000000e+00 2.705220947265625000e+02 -9.275000000000000000e+01 4.575000000000000000e+01
4.500000000000000000e+01 7.576230769230769511e+02 3.445300903320312500e+02 3.486785888671875000e+00 0.000000000000000000e+00 0.000000000000000000e+00 3.120168457031250000e+03 3.837877273559570312e+00 4.000000000000000000e+00 3.208588256835937500e+02 -9.225000000000000000e+01 4.575000000000000000e+01
5.800000000000000000e+01 7.552846153846151083e+02 3.723968811035156250e+02 3.550445556640625000e+00 0.000000000000000000e+00 0.000000000000000000e+00 3.111820312500000000e+03 3.353128671646118164e+00 4.000000000000000000e+00 3.933424072265625000e+02 -9.175000000000000000e+01 4.575000000000000000e+01
4.400000000000000000e+01 7.529076923076924004e+02 3.768558959960937500e+02 3.768646240234375000e+00 0.000000000000000000e+00 0.000000000000000000e+00 3.119025146484375000e+03 1.885235667228698730e+00 3.000000000000000000e+00 3.856524658203125000e+02 -9.125000000000000000e+01 4.575000000000000000e+01
4.500000000000000000e+01 7.990461538461538566e+02 3.642040405273437500e+02 4.205078125000000000e+00 0.000000000000000000e+00 0.000000000000000000e+00 3.136117431640625000e+03 3.561506986618041992e+00 4.000000000000000000e+00 4.685121459960937500e+02 -9.025000000000000000e+01 4.575000000000000000e+01
4.800000000000000000e+01 7.805615384615383618e+02 3.609486694335937500e+02 4.426300048828125000e+00 0.000000000000000000e+00 0.000000000000000000e+00 3.043817871093750000e+03 2.319310426712036133e+00 4.000000000000000000e+00 4.818140563964843750e+02 -8.975000000000000000e+01 4.575000000000000000e+01
4.700000000000000000e+01 7.530615384615385892e+02 3.853658447265625000e+02 4.650543212890625000e+00 0.000000000000000000e+00 0.000000000000000000e+00 3.030002685546875000e+03 1.462739467620849609e+00 4.000000000000000000e+00 5.006720581054687500e+02 -8.925000000000000000e+01 4.575000000000000000e+01
6.100000000000000000e+01 7.186230769230767237e+02 3.974042968750000000e+02 4.874786376953125000e+00 0.000000000000000000e+00 0.000000000000000000e+00 3.011453613281250000e+03 9.159872531890869141e-01 4.000000000000000000e+00 4.835430297851562500e+02 -8.875000000000000000e+01 4.575000000000000000e+01
5.400000000000000000e+01 7.572000000000002728e+02 3.810452880859375000e+02 5.099029541015625000e+00 0.000000000000000000e+00 0.000000000000000000e+00 2.986979492187500000e+03 9.417324662208557129e-01 4.000000000000000000e+00 3.952954101562500000e+02 -8.825000000000000000e+01 4.575000000000000000e+01
1.800000000000000000e+01 7.931999999999999318e+02 3.751127014160156250e+02 5.130889892578125000e+00 0.000000000000000000e+00 0.000000000000000000e+00 2.929010253906250000e+03 9.597558379173278809e-01 2.000000000000000000e+00 2.927509765625000000e+02 -8.775000000000000000e+01 4.575000000000000000e+01
5.400000000000000000e+01 9.981384615384614563e+02 3.966619567871093750e+02 3.103057861328125000e+00 0.000000000000000000e+00 0.000000000000000000e+00 2.724597656250000000e+03 9.514601230621337891e-01 4.000000000000000000e+00 2.296415710449218750e+02 -8.025000000000000000e+01 4.575000000000000000e+01
6.300000000000000000e+01 1.029430769230770011e+03 4.143117065429687500e+02 2.793914794921875000e+00 0.000000000000000000e+00 0.000000000000000000e+00 2.711020263671875000e+03 9.151687622070312500e-01 4.000000000000000000e+00 4.207136230468750000e+02 -7.925000000000000000e+01 4.575000000000000000e+01
5.100000000000000000e+01 1.054861538461537748e+03 4.191122436523437500e+02 2.639343261718750000e+00 0.000000000000000000e+00 0.000000000000000000e+00 2.704698730468750000e+03 9.019773602485656738e-01 4.000000000000000000e+00 4.522931518554687500e+02 -7.875000000000000000e+01 4.575000000000000000e+01
6.500000000000000000e+01 9.450615384615383618e+02 4.169147338867187500e+02 2.607421875000000000e+00 0.000000000000000000e+00 0.000000000000000000e+00 2.664086914062500000e+03 8.998112678527832031e-01 4.000000000000000000e+00 4.629186096191406250e+02 -7.825000000000000000e+01 4.575000000000000000e+01
5.200000000000000000e+01 8.289538461538461434e+02 3.953965759277343750e+02 2.575531005859375000e+00 0.000000000000000000e+00 0.000000000000000000e+00 2.655693603515625000e+03 9.259387850761413574e-01 4.000000000000000000e+00 2.760239562988281250e+02 -7.775000000000000000e+01 4.575000000000000000e+01
6.200000000000000000e+01 1.001353846153846348e+03 4.618544921875000000e+02 2.403564453125000000e+00 0.000000000000000000e+00 0.000000000000000000e+00 2.590334960937500000e+03 9.374040365219116211e-01 4.000000000000000000e+00 2.550958709716796875e+02 -7.625000000000000000e+01 4.575000000000000000e+01
6.200000000000000000e+01 1.018653846153845961e+03 5.001443786621093750e+02 2.310668945312500000e+00 0.000000000000000000e+00 0.000000000000000000e+00 2.579305664062500000e+03 9.369126558303833008e-01 4.000000000000000000e+00 2.293017120361328125e+02 -7.575000000000000000e+01 4.575000000000000000e+01
6.000000000000000000e+01 1.052599999999999909e+03 5.129161987304687500e+02 2.217803955078125000e+00 0.000000000000000000e+00 0.000000000000000000e+00 2.568727539062500000e+03 9.300630688667297363e-01 4.000000000000000000e+00 2.563749694824218750e+02 -7.525000000000000000e+01 4.575000000000000000e+01
4.600000000000000000e+01 1.065684615384614972e+03 5.315325927734375000e+02 2.119201660156250000e+00 0.000000000000000000e+00 0.000000000000000000e+00 2.521252929687500000e+03 9.313778281211853027e-01 4.000000000000000000e+00 2.265335540771484375e+02 -7.475000000000000000e+01 4.575000000000000000e+01
6.000000000000000000e+01 1.128153846153846644e+03 5.210023193359375000e+02 2.014862060546875000e+00 0.000000000000000000e+00 0.000000000000000000e+00 2.510943115234375000e+03 1.602787494659423828e+00 4.000000000000000000e+00 2.675225219726562500e+02 -7.425000000000000000e+01 4.575000000000000000e+01
6.300000000000000000e+01 1.084499999999999545e+03 5.034533081054687500e+02 1.910522460937500000e+00 0.000000000000000000e+00 0.000000000000000000e+00 2.500235107421875000e+03 3.415514945983886719e+00 4.000000000000000000e+00 5.585673141479492188e+01 -7.375000000000000000e+01 4.575000000000000000e+01
3.700000000000000000e+01 1.394092307692307713e+03 5.407262573242187500e+02 1.668304443359375000e+00 0.000000000000000000e+00 0.000000000000000000e+00 2.451965332031250000e+03 9.065047502517700195e-01 3.000000000000000000e+00 2.908373718261718750e+02 -7.175000000000000000e+01 4.575000000000000000e+01
4.800000000000000000e+01 1.377838461538461388e+03 5.204317626953125000e+02 1.627655029296875000e+00 0.000000000000000000e+00 0.000000000000000000e+00 2.449320312500000000e+03 8.933089971542358398e-01 4.000000000000000000e+00 3.527694396972656250e+02 -7.125000000000000000e+01 4.575000000000000000e+01
6.000000000000000000e+01 1.150284615384615336e+03 5.197618408203125000e+02 1.705688476562500000e+00 0.000000000000000000e+00 0.000000000000000000e+00 2.459083984375000000e+03 8.862516283988952637e-01 4.000000000000000000e+00 3.955530090332031250e+02 -7.075000000000000000e+01 4.575000000000000000e+01
6.600000000000000000e+01 1.201423076923077133e+03 5.215807495117187500e+02 1.783752441406250000e+00 0.000000000000000000e+00 0.000000000000000000e+00 2.464739013671875000e+03 8.714466094970703125e-01 4.000000000000000000e+00 5.849837646484375000e+02 -7.025000000000000000e+01 4.575000000000000000e+01
6.800000000000000000e+01 1.205853846153846234e+03 5.560482177734375000e+02 1.971099853515625000e+00 0.000000000000000000e+00 0.000000000000000000e+00 2.517939941406250000e+03 8.839658498764038086e-01 4.000000000000000000e+00 3.532673645019531250e+02 -6.925000000000000000e+01 4.575000000000000000e+01
6.100000000000000000e+01 1.152646153846153993e+03 5.546845092773437500e+02 2.377258300781250000e+00 0.000000000000000000e+00 0.000000000000000000e+00 2.547488525390625000e+03 9.163369536399841309e-01 4.000000000000000000e+00 1.563813781738281250e+02 -6.825000000000000000e+01 4.575000000000000000e+01
6.300000000000000000e+01 1.260115384615384528e+03 5.718708496093750000e+02 2.580352783203125000e+00 0.000000000000000000e+00 0.000000000000000000e+00 2.562993408203125000e+03 9.168884754180908203e-01 4.000000000000000000e+00 1.596933441162109375e+02 -6.775000000000000000e+01 4.575000000000000000e+01
6.500000000000000000e+01 1.327969230769230307e+03 5.392333374023437500e+02 3.176269531250000000e+00 0.000000000000000000e+00 0.000000000000000000e+00 2.600769287109375000e+03 1.735195636749267578e+00 4.000000000000000000e+00 8.172579193115234375e+01 -6.675000000000000000e+01 4.575000000000000000e+01
6.800000000000000000e+01 1.326584615384615063e+03 5.685342407226562500e+02 3.835418701171875000e+00 0.000000000000000000e+00 0.000000000000000000e+00 2.616437255859375000e+03 1.131384134292602539e+00 4.000000000000000000e+00 1.275015487670898438e+02 -6.575000000000000000e+01 4.575000000000000000e+01
3.600000000000000000e+01 1.486915384615384937e+03 5.738226928710937500e+02 4.143218994140625000e+00 0.000000000000000000e+00 0.000000000000000000e+00 2.623920898437500000e+03 8.873152732849121094e-01 3.000000000000000000e+00 2.176613922119140625e+02 -6.525000000000000000e+01 4.575000000000000000e+01
3.300000000000000000e+01 6.989307692307692150e+02 3.186767578125000000e+02 3.267181396484375000e+00 0.000000000000000000e+00 0.000000000000000000e+00 3.177931884765625000e+03 3.805998563766479492e+00 3.000000000000000000e+00 3.863222045898437500e+02 -9.475000000000000000e+01 4.625000000000000000e+01
2.800000000000000000e+01 7.173384615384615017e+02 3.388679504394531250e+02 3.028045654296875000e+00 0.000000000000000000e+00 0.000000000000000000e+00 3.118747314453125000e+03 3.767975568771362305e+00 3.000000000000000000e+00 3.860020446777343750e+02 -9.325000000000000000e+01 4.625000000000000000e+01
3.800000000000000000e+01 7.417538461538458705e+02 3.394151916503906250e+02 3.040405273437500000e+00 0.000000000000000000e+00 0.000000000000000000e+00 3.113697021484375000e+03 3.782386302947998047e+00 3.000000000000000000e+00 3.566663818359375000e+02 -9.275000000000000000e+01 4.625000000000000000e+01
4.500000000000000000e+01 7.400076923076926505e+02 3.375303649902343750e+02 3.052764892578125000e+00 0.000000000000000000e+00 0.000000000000000000e+00 3.040935791015625000e+03 1.660552382469177246e+00 4.000000000000000000e+00 3.573491516113281250e+02 -9.225000000000000000e+01 4.625000000000000000e+01
4.300000000000000000e+01 7.577461538461540158e+02 3.599529418945312500e+02 3.124176025390625000e+00 0.000000000000000000e+00 0.000000000000000000e+00 3.044729248046875000e+03 1.139759421348571777e+00 3.000000000000000000e+00 3.298418884277343750e+02 -9.175000000000000000e+01 4.625000000000000000e+01
4.100000000000000000e+01 7.105769230769230944e+02 3.739111938476562500e+02 3.372711181640625000e+00 0.000000000000000000e+00 0.000000000000000000e+00 3.112397705078125000e+03 1.073204040527343750e+00 3.000000000000000000e+00 4.290896301269531250e+02 -9.125000000000000000e+01 4.625000000000000000e+01
5.900000000000000000e+01 7.191538461538465299e+02 4.060498352050781250e+02 3.621215820312500000e+00 0.000000000000000000e+00 0.000000000000000000e+00 3.131794433593750000e+03 9.355932474136352539e-01 4.000000000000000000e+00 4.554218444824218750e+02 -9.075000000000000000e+01 4.625000000000000000e+01
5.700000000000000000e+01 7.842000000000002728e+02 4.112475891113281250e+02 3.869750976562500000e+00 0.000000000000000000e+00 0.000000000000000000e+00 3.100885253906250000e+03 1.091990590095520020e+00 4.000000000000000000e+00 5.100095520019531250e+02 -9.025000000000000000e+01 4.625000000000000000e+01
4.000000000000000000e+01 7.709461538461539476e+02 3.848157653808593750e+02 4.102111816406250000e+00 0.000000000000000000e+00 0.000000000000000000e+00 3.105143798828125000e+03 1.078135967254638672e+00 3.000000000000000000e+00 5.059528198242187500e+02 -8.975000000000000000e+01 4.625000000000000000e+01
4.700000000000000000e+01 7.451692307692311488e+02 3.996348571777343750e+02 4.318328857421875000e+00 0.000000000000000000e+00 0.000000000000000000e+00 3.059632812500000000e+03 8.991410732269287109e-01 4.000000000000000000e+00 5.262229003906250000e+02 -8.925000000000000000e+01 4.625000000000000000e+01
6.200000000000000000e+01 7.223307692307688512e+02 3.984039916992187500e+02 4.534576416015625000e+00 0.000000000000000000e+00 0.000000000000000000e+00 3.041530273437500000e+03 9.007092714309692383e-01 4.000000000000000000e+00 4.647298583984375000e+02 -8.875000000000000000e+01 4.625000000000000000e+01
5.900000000000000000e+01 7.245461538461537430e+02 3.857439880371093750e+02 4.750793457031250000e+00 0.000000000000000000e+00 0.000000000000000000e+00 2.914254882812500000e+03 9.142629504203796387e-01 4.000000000000000000e+00 4.662372436523437500e+02 -8.825000000000000000e+01 4.625000000000000000e+01
6.500000000000000000e+01 9.172076923076919002e+02 4.322235717773437500e+02 4.717529296875000000e+00 0.000000000000000000e+00 0.000000000000000000e+00 2.871667480468750000e+03 9.375448226928710938e-01 4.000000000000000000e+00 3.420097045898437500e+02 -8.725000000000000000e+01 4.625000000000000000e+01
6.500000000000000000e+01 9.118230769230774513e+02 4.950686645507812500e+02 4.667633056640625000e+00 0.000000000000000000e+00 0.000000000000000000e+00 2.765079833984375000e+03 9.380130767822265625e-01 4.000000000000000000e+00 2.576682128906250000e+02 -8.675000000000000000e+01 4.625000000000000000e+01
5.600000000000000000e+01 8.055461538461532882e+02 4.675172424316406250e+02 4.617736816406250000e+00 0.000000000000000000e+00 0.000000000000000000e+00 2.637604248046875000e+03 1.938717365264892578e+00 4.000000000000000000e+00 2.208110504150390625e+02 -8.625000000000000000e+01 4.625000000000000000e+01
6.500000000000000000e+01 7.798307692307691923e+02 4.058307189941406250e+02 4.060852050781250000e+00 0.000000000000000000e+00 0.000000000000000000e+00 2.722876708984375000e+03 1.262503981590270996e+00 4.000000000000000000e+00 2.140089416503906250e+02 -8.475000000000000000e+01 4.625000000000000000e+01
4.600000000000000000e+01 8.204230769230770193e+02 3.807220153808593750e+02 3.862213134765625000e+00 0.000000000000000000e+00 0.000000000000000000e+00 2.752462646484375000e+03 2.360927104949951172e+00 4.000000000000000000e+00 1.820630187988281250e+02 -8.425000000000000000e+01 4.625000000000000000e+01
4.800000000000000000e+01 8.447461538461540158e+02 3.314038085937500000e+02 2.752410888671875000e+00 0.000000000000000000e+00 0.000000000000000000e+00 2.780281005859375000e+03 1.841939806938171387e+00 4.000000000000000000e+00 2.223423309326171875e+02 -8.175000000000000000e+01 4.625000000000000000e+01
4.300000000000000000e+01 8.254076923076918320e+02 4.063440856933593750e+02 2.382110595703125000e+00 0.000000000000000000e+00 0.000000000000000000e+00 2.702580322265625000e+03 9.473316073417663574e-01 3.000000000000000000e+00 2.259939575195312500e+02 -8.075000000000000000e+01 4.625000000000000000e+01
2.700000000000000000e+01 8.957538461538460979e+02 4.475372619628906250e+02 2.267150878906250000e+00 0.000000000000000000e+00 0.000000000000000000e+00 2.695428955078125000e+03 9.439798593521118164e-01 3.000000000000000000e+00 1.946758422851562500e+02 -8.025000000000000000e+01 4.625000000000000000e+01
3.800000000000000000e+01 9.457846153846151083e+02 4.889521179199218750e+02 2.084075927734375000e+00 0.000000000000000000e+00 0.000000000000000000e+00 2.708508056640625000e+03 9.312053918838500977e-01 3.000000000000000000e+00 2.459616241455078125e+02 -7.925000000000000000e+01 4.625000000000000000e+01
6.500000000000000000e+01 9.403999999999996362e+02 4.840434570312500000e+02 1.992553710937500000e+00 0.000000000000000000e+00 0.000000000000000000e+00 2.651744873046875000e+03 9.142066836357116699e-01 4.000000000000000000e+00 2.563043212890625000e+02 -7.875000000000000000e+01 4.625000000000000000e+01
7.100000000000000000e+01 9.007461538461536747e+02 4.543480529785156250e+02 1.998565673828125000e+00 0.000000000000000000e+00 0.000000000000000000e+00 2.669236816406250000e+03 9.115326404571533203e-01 4.000000000000000000e+00 2.557548217773437500e+02 -7.825000000000000000e+01 4.625000000000000000e+01
5.900000000000000000e+01 8.927153846153844370e+02 4.033090515136718750e+02 2.004577636718750000e+00 0.000000000000000000e+00 0.000000000000000000e+00 2.656326171875000000e+03 9.253548979759216309e-01 4.000000000000000000e+00 3.084174804687500000e+02 -7.775000000000000000e+01 4.625000000000000000e+01
6.500000000000000000e+01 8.949538461538468255e+02 3.933211669921875000e+02 2.010589599609375000e+00 0.000000000000000000e+00 0.000000000000000000e+00 2.589976318359375000e+03 9.313526749610900879e-01 4.000000000000000000e+00 3.019348144531250000e+02 -7.725000000000000000e+01 4.625000000000000000e+01
5.800000000000000000e+01 9.650461538461538566e+02 4.216457824707031250e+02 2.000213623046875000e+00 0.000000000000000000e+00 0.000000000000000000e+00 2.586224609375000000e+03 9.199632406234741211e-01 4.000000000000000000e+00 2.927533874511718750e+02 -7.675000000000000000e+01 4.625000000000000000e+01
6.300000000000000000e+01 9.464384615384610697e+02 5.032089233398437500e+02 1.881103515625000000e+00 0.000000000000000000e+00 0.000000000000000000e+00 2.577852539062500000e+03 9.180198311805725098e-01 4.000000000000000000e+00 3.250304870605468750e+02 -7.575000000000000000e+01 4.625000000000000000e+01
3.500000000000000000e+01 1.014600000000000591e+03 5.220895385742187500e+02 1.821563720703125000e+00 0.000000000000000000e+00 0.000000000000000000e+00 2.507330810546875000e+03 9.043288230895996094e-01 3.000000000000000000e+00 3.410028991699218750e+02 -7.525000000000000000e+01 4.625000000000000000e+01
6.900000000000000000e+01 1.094330769230769420e+03 5.481616210937500000e+02 1.628875732421875000e+00 0.000000000000000000e+00 0.000000000000000000e+00 2.511954833984375000e+03 8.829041719436645508e-01 4.000000000000000000e+00 4.882854003906250000e+02 -7.425000000000000000e+01 4.625000000000000000e+01
3.600000000000000000e+01 1.059776923076923367e+03 5.255335693359375000e+02 1.520294189453125000e+00 0.000000000000000000e+00 0.000000000000000000e+00 2.494542724609375000e+03 8.862539529800415039e-01 3.000000000000000000e+00 2.838650207519531250e+02 -7.375000000000000000e+01 4.625000000000000000e+01
3.800000000000000000e+01 1.119223076923076860e+03 5.213794555664062500e+02 1.255096435546875000e+00 0.000000000000000000e+00 0.000000000000000000e+00 2.452386474609375000e+03 2.311452627182006836e+00 3.000000000000000000e+00 8.318289184570312500e+01 -7.225000000000000000e+01 4.625000000000000000e+01
6.700000000000000000e+01 1.238338461538461843e+03 5.403292236328125000e+02 1.181152343750000000e+00 0.000000000000000000e+00 0.000000000000000000e+00 2.443922851562500000e+03 9.063367843627929688e-01 4.000000000000000000e+00 1.645994873046875000e+02 -7.175000000000000000e+01 4.625000000000000000e+01
4.800000000000000000e+01 1.306930769230768874e+03 5.357221069335937500e+02 1.107177734375000000e+00 0.000000000000000000e+00 0.000000000000000000e+00 2.390313720703125000e+03 8.877968788146972656e-01 4.000000000000000000e+00 3.428386840820312500e+02 -7.125000000000000000e+01 4.625000000000000000e+01
6.200000000000000000e+01 1.204638461538461797e+03 5.315548706054687500e+02 1.145507812500000000e+00 0.000000000000000000e+00 0.000000000000000000e+00 2.449380859375000000e+03 8.821114897727966309e-01 4.000000000000000000e+00 2.967801818847656250e+02 -7.075000000000000000e+01 4.625000000000000000e+01
5.500000000000000000e+01 1.193384615384615927e+03 4.960264587402343750e+02 1.183837890625000000e+00 0.000000000000000000e+00 0.000000000000000000e+00 2.459519531250000000e+03 8.683128356933593750e-01 4.000000000000000000e+00 4.172632751464843750e+02 -7.025000000000000000e+01 4.625000000000000000e+01
6.800000000000000000e+01 1.149669230769231035e+03 5.215689086914062500e+02 1.222137451171875000e+00 0.000000000000000000e+00 0.000000000000000000e+00 2.427448242187500000e+03 8.709378838539123535e-01 4.000000000000000000e+00 4.704704589843750000e+02 -6.975000000000000000e+01 4.625000000000000000e+01
6.100000000000000000e+01 1.110984615384615836e+03 5.459500122070312500e+02 1.299865722656250000e+00 0.000000000000000000e+00 0.000000000000000000e+00 2.436332275390625000e+03 8.769529461860656738e-01 4.000000000000000000e+00 3.133165588378906250e+02 -6.925000000000000000e+01 4.625000000000000000e+01
6.900000000000000000e+01 1.134615384615384301e+03 5.284024658203125000e+02 1.495788574218750000e+00 0.000000000000000000e+00 0.000000000000000000e+00 2.521808593750000000e+03 8.832520842552185059e-01 4.000000000000000000e+00 2.283243713378906250e+02 -6.875000000000000000e+01 4.625000000000000000e+01
4.800000000000000000e+01 1.126538461538461434e+03 5.109128417968750000e+02 1.691680908203125000e+00 0.000000000000000000e+00 0.000000000000000000e+00 2.547658935546875000e+03 8.901136517524719238e-01 4.000000000000000000e+00 2.676660766601562500e+02 -6.825000000000000000e+01 4.625000000000000000e+01
4.900000000000000000e+01 1.206315384615384573e+03 5.179691772460937500e+02 1.887573242187500000e+00 0.000000000000000000e+00 0.000000000000000000e+00 2.546516601562500000e+03 2.172959566116333008e+00 4.000000000000000000e+00 1.228268966674804688e+02 -6.775000000000000000e+01 4.625000000000000000e+01
6.700000000000000000e+01 1.335323076923076997e+03 5.199052124023437500e+02 2.164611816406250000e+00 0.000000000000000000e+00 0.000000000000000000e+00 2.558908203125000000e+03 8.838614225387573242e-01 4.000000000000000000e+00 2.204270019531250000e+02 -6.725000000000000000e+01 4.625000000000000000e+01
2.800000000000000000e+01 1.349792307692308668e+03 5.187103881835937500e+02 2.522735595703125000e+00 0.000000000000000000e+00 0.000000000000000000e+00 2.608261230468750000e+03 1.878321766853332520e+00 3.000000000000000000e+00 1.620578002929687500e+02 -6.675000000000000000e+01 4.625000000000000000e+01
4.600000000000000000e+01 1.278084615384615290e+03 5.180870361328125000e+02 2.880859375000000000e+00 0.000000000000000000e+00 0.000000000000000000e+00 2.630754150390625000e+03 2.224163532257080078e+00 4.000000000000000000e+00 1.620080108642578125e+02 -6.625000000000000000e+01 4.625000000000000000e+01
6.600000000000000000e+01 1.252200000000000273e+03 5.256549072265625000e+02 3.238983154296875000e+00 0.000000000000000000e+00 0.000000000000000000e+00 2.637626464843750000e+03 2.246647834777832031e+00 4.000000000000000000e+00 7.362239837646484375e+01 -6.575000000000000000e+01 4.625000000000000000e+01
6.200000000000000000e+01 1.272976923076923867e+03 5.510371093750000000e+02 3.600433349609375000e+00 0.000000000000000000e+00 0.000000000000000000e+00 2.625540771484375000e+03 1.857639431953430176e+00 4.000000000000000000e+00 9.304090881347656250e+01 -6.525000000000000000e+01 4.625000000000000000e+01
6.600000000000000000e+01 1.210646153846154448e+03 5.633942260742187500e+02 3.962982177734375000e+00 0.000000000000000000e+00 0.000000000000000000e+00 2.617487548828125000e+03 9.195128679275512695e-01 4.000000000000000000e+00 5.175208663940429688e+01 -6.475000000000000000e+01 4.625000000000000000e+01
3.100000000000000000e+01 6.684692307692309896e+02 3.276938171386718750e+02 3.008819580078125000e+00 0.000000000000000000e+00 0.000000000000000000e+00 3.185925781250000000e+03 3.738199949264526367e+00 3.000000000000000000e+00 4.519400024414062500e+02 -9.525000000000000000e+01 4.675000000000000000e+01
4.500000000000000000e+01 7.046923076923077360e+02 2.922017211914062500e+02 2.716461181640625000e+00 0.000000000000000000e+00 0.000000000000000000e+00 3.116756347656250000e+03 3.785373687744140625e+00 4.000000000000000000e+00 4.173846130371093750e+02 -9.425000000000000000e+01 4.675000000000000000e+01
4.600000000000000000e+01 6.825923076923077133e+02 2.883411865234375000e+02 2.570281982421875000e+00 0.000000000000000000e+00 0.000000000000000000e+00 3.082171630859375000e+03 3.760119438171386719e+00 4.000000000000000000e+00 4.008521728515625000e+02 -9.375000000000000000e+01 4.675000000000000000e+01
4.900000000000000000e+01 6.992461538461539021e+02 3.352330322265625000e+02 2.593750000000000000e+00 0.000000000000000000e+00 0.000000000000000000e+00 3.058227050781250000e+03 3.673784017562866211e+00 4.000000000000000000e+00 4.038409423828125000e+02 -9.275000000000000000e+01 4.675000000000000000e+01
4.100000000000000000e+01 7.446384615384614563e+02 3.300095520019531250e+02 2.605468750000000000e+00 0.000000000000000000e+00 0.000000000000000000e+00 3.046254882812500000e+03 3.606956243515014648e+00 3.000000000000000000e+00 3.908229370117187500e+02 -9.225000000000000000e+01 4.675000000000000000e+01
5.800000000000000000e+01 7.347769230769227988e+02 4.130571289062500000e+02 3.930297851562500000e+00 0.000000000000000000e+00 0.000000000000000000e+00 3.139449218750000000e+03 9.117667675018310547e-01 4.000000000000000000e+00 2.640792541503906250e+02 -8.925000000000000000e+01 4.675000000000000000e+01
4.900000000000000000e+01 7.280923076923080544e+02 4.067303161621093750e+02 4.132080078125000000e+00 0.000000000000000000e+00 0.000000000000000000e+00 3.121290527343750000e+03 9.058809280395507812e-01 4.000000000000000000e+00 2.686966857910156250e+02 -8.875000000000000000e+01 4.675000000000000000e+01
5.400000000000000000e+01 8.611538461538465299e+02 4.027811889648437500e+02 2.106048583984375000e+00 0.000000000000000000e+00 0.000000000000000000e+00 2.767356201171875000e+03 8.864263892173767090e-01 4.000000000000000000e+00 4.695720825195312500e+02 -8.225000000000000000e+01 4.675000000000000000e+01
6.800000000000000000e+01 8.128384615384615017e+02 4.367919311523437500e+02 1.727874755859375000e+00 0.000000000000000000e+00 0.000000000000000000e+00 2.741767333984375000e+03 1.117929935455322266e+00 4.000000000000000000e+00 4.045057678222656250e+02 -8.125000000000000000e+01 4.675000000000000000e+01
5.700000000000000000e+01 8.405923076923073722e+02 4.677199707031250000e+02 1.463745117187500000e+00 0.000000000000000000e+00 0.000000000000000000e+00 2.715852539062500000e+03 9.184846282005310059e-01 4.000000000000000000e+00 3.155139770507812500e+02 -8.025000000000000000e+01 4.675000000000000000e+01
6.200000000000000000e+01 8.931000000000003638e+02 4.712270202636718750e+02 1.426727294921875000e+00 0.000000000000000000e+00 0.000000000000000000e+00 2.702623779296875000e+03 9.096713662147521973e-01 4.000000000000000000e+00 2.987721557617187500e+02 -7.975000000000000000e+01 4.675000000000000000e+01
6.900000000000000000e+01 9.214461538461545160e+02 4.907064514160156250e+02 1.389709472656250000e+00 0.000000000000000000e+00 0.000000000000000000e+00 2.689394775390625000e+03 9.118303060531616211e-01 4.000000000000000000e+00 3.305902099609375000e+02 -7.925000000000000000e+01 4.675000000000000000e+01
6.000000000000000000e+01 9.635461538461532882e+02 4.880732116699218750e+02 1.352691650390625000e+00 0.000000000000000000e+00 0.000000000000000000e+00 2.676166015625000000e+03 8.984312415122985840e-01 4.000000000000000000e+00 3.049370117187500000e+02 -7.875000000000000000e+01 4.675000000000000000e+01
6.900000000000000000e+01 9.318692307692306258e+02 4.693503723144531250e+02 1.391296386718750000e+00 0.000000000000000000e+00 0.000000000000000000e+00 2.659817626953125000e+03 8.927317857742309570e-01 4.000000000000000000e+00 3.582673339843750000e+02 -7.825000000000000000e+01 4.675000000000000000e+01
6.900000000000000000e+01 9.144999999999998863e+02 4.355164489746093750e+02 1.429870605468750000e+00 0.000000000000000000e+00 0.000000000000000000e+00 2.643469238281250000e+03 8.949347138404846191e-01 4.000000000000000000e+00 3.617947998046875000e+02 -7.775000000000000000e+01 4.675000000000000000e+01
6.900000000000000000e+01 9.227692307692303757e+02 4.271776123046875000e+02 1.468475341796875000e+00 0.000000000000000000e+00 0.000000000000000000e+00 2.627120849609375000e+03 8.940969705581665039e-01 4.000000000000000000e+00 3.711219177246093750e+02 -7.725000000000000000e+01 4.675000000000000000e+01
5.800000000000000000e+01 9.438615384615376342e+02 4.856557617187500000e+02 1.459716796875000000e+00 0.000000000000000000e+00 0.000000000000000000e+00 2.585633300781250000e+03 8.893709182739257812e-01 4.000000000000000000e+00 2.651846923828125000e+02 -7.625000000000000000e+01 4.675000000000000000e+01
5.200000000000000000e+01 1.073792307692308214e+03 5.254863891601562500e+02 1.399414062500000000e+00 0.000000000000000000e+00 0.000000000000000000e+00 2.538870849609375000e+03 8.806145191192626953e-01 4.000000000000000000e+00 3.045661010742187500e+02 -7.525000000000000000e+01 4.675000000000000000e+01
4.800000000000000000e+01 9.884461538461540613e+02 5.388836669921875000e+02 1.329589843750000000e+00 0.000000000000000000e+00 0.000000000000000000e+00 2.515255371093750000e+03 8.776153922080993652e-01 4.000000000000000000e+00 4.685829162597656250e+02 -7.475000000000000000e+01 4.675000000000000000e+01
6.600000000000000000e+01 9.488000000000000682e+02 5.406483154296875000e+02 1.220123291015625000e+00 0.000000000000000000e+00 0.000000000000000000e+00 2.491405517578125000e+03 8.745907545089721680e-01 4.000000000000000000e+00 5.654186401367187500e+02 -7.425000000000000000e+01 4.675000000000000000e+01
6.000000000000000000e+01 8.979846153846157222e+02 5.190686645507812500e+02 1.110626220703125000e+00 0.000000000000000000e+00 0.000000000000000000e+00 2.467555908203125000e+03 8.745860457420349121e-01 4.000000000000000000e+00 4.318895874023437500e+02 -7.375000000000000000e+01 4.675000000000000000e+01
6.400000000000000000e+01 1.018176923076922890e+03 4.773358459472656250e+02 1.001159667968750000e+00 0.000000000000000000e+00 0.000000000000000000e+00 2.443706054687500000e+03 8.760065436363220215e-01 4.000000000000000000e+00 3.847901306152343750e+02 -7.325000000000000000e+01 4.675000000000000000e+01
6.600000000000000000e+01 1.142976923076922958e+03 4.758912353515625000e+02 8.994140625000000000e-01 0.000000000000000000e+00 0.000000000000000000e+00 2.429198974609375000e+03 8.778076171875000000e-01 4.000000000000000000e+00 2.019501953125000000e+02 -7.275000000000000000e+01 4.675000000000000000e+01
6.600000000000000000e+01 1.207384615384616609e+03 4.993207702636718750e+02 6.148376464843750000e-01 0.000000000000000000e+00 0.000000000000000000e+00 2.419132324218750000e+03 8.665437698364257812e-01 4.000000000000000000e+00 5.514144287109375000e+02 -7.025000000000000000e+01 4.675000000000000000e+01
6.500000000000000000e+01 1.058792307692307986e+03 5.000729980468750000e+02 6.213073730468750000e-01 0.000000000000000000e+00 0.000000000000000000e+00 2.431188476562500000e+03 8.714303970336914062e-01 4.000000000000000000e+00 3.356127929687500000e+02 -6.975000000000000000e+01 4.675000000000000000e+01
6.800000000000000000e+01 1.073930769230769329e+03 5.192227172851562500e+02 6.737060546875000000e-01 0.000000000000000000e+00 0.000000000000000000e+00 2.449066406250000000e+03 8.746020197868347168e-01 4.000000000000000000e+00 3.294878845214843750e+02 -6.925000000000000000e+01 4.675000000000000000e+01
6.500000000000000000e+01 1.097538461538461206e+03 5.209962768554687500e+02 8.638000488281250000e-01 0.000000000000000000e+00 0.000000000000000000e+00 2.484409179687500000e+03 8.783323168754577637e-01 4.000000000000000000e+00 2.988483581542968750e+02 -6.875000000000000000e+01 4.675000000000000000e+01
6.700000000000000000e+01 1.070507692307692423e+03 5.021197509765625000e+02 1.053894042968750000e+00 0.000000000000000000e+00 0.000000000000000000e+00 2.519751953125000000e+03 1.936533093452453613e+00 4.000000000000000000e+00 2.072113342285156250e+02 -6.825000000000000000e+01 4.675000000000000000e+01
4.000000000000000000e+01 1.206023076923076360e+03 4.939739379882812500e+02 1.243988037109375000e+00 0.000000000000000000e+00 0.000000000000000000e+00 2.555094726562500000e+03 1.957767486572265625e+00 3.000000000000000000e+00 1.703232879638671875e+02 -6.775000000000000000e+01 4.675000000000000000e+01
4.200000000000000000e+01 1.231400000000000091e+03 5.112060852050781250e+02 1.530609130859375000e+00 0.000000000000000000e+00 0.000000000000000000e+00 2.592951171875000000e+03 8.693246245384216309e-01 3.000000000000000000e+00 3.545072631835937500e+02 -6.725000000000000000e+01 4.675000000000000000e+01
5.000000000000000000e+01 1.263753846153846098e+03 5.146528930664062500e+02 1.913787841796875000e+00 0.000000000000000000e+00 0.000000000000000000e+00 2.633321289062500000e+03 8.592669963836669922e-01 4.000000000000000000e+00 4.314564514160156250e+02 -6.675000000000000000e+01 4.675000000000000000e+01
4.700000000000000000e+01 1.258607692307692787e+03 4.833648071289062500e+02 2.296966552734375000e+00 0.000000000000000000e+00 0.000000000000000000e+00 2.673691406250000000e+03 2.161656618118286133e+00 4.000000000000000000e+00 1.586210479736328125e+02 -6.625000000000000000e+01 4.675000000000000000e+01
4.200000000000000000e+01 1.222330769230769647e+03 4.400264587402343750e+02 2.680175781250000000e+00 0.000000000000000000e+00 0.000000000000000000e+00 2.714061523437500000e+03 2.206472158432006836e+00 3.000000000000000000e+00 5.892361068725585938e+01 -6.575000000000000000e+01 4.675000000000000000e+01
5.000000000000000000e+01 1.289930769230769783e+03 4.446097412109375000e+02 3.089630126953125000e+00 0.000000000000000000e+00 0.000000000000000000e+00 2.680614990234375000e+03 2.233688831329345703e+00 4.000000000000000000e+00 6.647561645507812500e+01 -6.525000000000000000e+01 4.675000000000000000e+01
6.000000000000000000e+01 6.735384615384616609e+02 3.310973205566406250e+02 2.532562255859375000e+00 0.000000000000000000e+00 0.000000000000000000e+00 3.087895507812500000e+03 3.689295530319213867e+00 4.000000000000000000e+00 4.684996643066406250e+02 -9.525000000000000000e+01 4.725000000000000000e+01
2.200000000000000000e+01 7.102615384615387484e+02 2.804486083984375000e+02 2.072082519531250000e+00 0.000000000000000000e+00 0.000000000000000000e+00 2.980944335937500000e+03 3.642541170120239258e+00 3.000000000000000000e+00 3.934663085937500000e+02 -9.375000000000000000e+01 4.725000000000000000e+01
4.300000000000000000e+01 7.093846153846154721e+02 2.958728332519531250e+02 2.078948974609375000e+00 0.000000000000000000e+00 0.000000000000000000e+00 2.965956787109375000e+03 3.634264945983886719e+00 3.000000000000000000e+00 4.081806030273437500e+02 -9.325000000000000000e+01 4.725000000000000000e+01
4.900000000000000000e+01 7.032615384615384073e+02 3.018532409667968750e+02 2.085815429687500000e+00 0.000000000000000000e+00 0.000000000000000000e+00 2.950969238281250000e+03 3.581420898437500000e+00 4.000000000000000000e+00 3.958314819335937500e+02 -9.275000000000000000e+01 4.725000000000000000e+01
5.500000000000000000e+01 7.531307692307691468e+02 3.306109008789062500e+02 2.092651367187500000e+00 0.000000000000000000e+00 0.000000000000000000e+00 2.935981689453125000e+03 3.231262683868408203e+00 4.000000000000000000e+00 4.340141906738281250e+02 -9.225000000000000000e+01 4.725000000000000000e+01
6.100000000000000000e+01 1.044669230769230808e+03 4.357940979003906250e+02 2.536437988281250000e+00 0.000000000000000000e+00 0.000000000000000000e+00 2.747424072265625000e+03 8.644177317619323730e-01 4.000000000000000000e+00 5.079204101562500000e+02 -8.425000000000000000e+01 4.725000000000000000e+01
5.700000000000000000e+01 9.385307692307688967e+02 4.078136291503906250e+02 1.931488037109375000e+00 0.000000000000000000e+00 0.000000000000000000e+00 2.696205322265625000e+03 8.591765165328979492e-01 4.000000000000000000e+00 5.041035766601562500e+02 -8.325000000000000000e+01 4.725000000000000000e+01
6.000000000000000000e+01 8.782999999999997272e+02 4.050295104980468750e+02 1.628997802734375000e+00 0.000000000000000000e+00 0.000000000000000000e+00 2.670595947265625000e+03 8.685788512229919434e-01 4.000000000000000000e+00 4.754668579101562500e+02 -8.275000000000000000e+01 4.725000000000000000e+01
5.700000000000000000e+01 8.124461538461538339e+02 4.140960998535156250e+02 1.392578125000000000e+00 0.000000000000000000e+00 0.000000000000000000e+00 2.652083984375000000e+03 8.792620897293090820e-01 4.000000000000000000e+00 4.404003601074218750e+02 -8.225000000000000000e+01 4.725000000000000000e+01
6.600000000000000000e+01 8.529461538461538339e+02 4.332727050781250000e+02 1.051910400390625000e+00 0.000000000000000000e+00 0.000000000000000000e+00 2.629255126953125000e+03 8.813276886940002441e-01 4.000000000000000000e+00 3.977248840332031250e+02 -8.125000000000000000e+01 4.725000000000000000e+01
6.400000000000000000e+01 8.348846153846158131e+02 4.129641418457031250e+02 8.815612792968750000e-01 0.000000000000000000e+00 0.000000000000000000e+00 2.617840820312500000e+03 8.939359188079833984e-01 4.000000000000000000e+00 4.101879882812500000e+02 -8.075000000000000000e+01 4.725000000000000000e+01
5.100000000000000000e+01 8.128538461538462343e+02 3.465453186035156250e+02 7.962036132812500000e-01 0.000000000000000000e+00 0.000000000000000000e+00 2.594106933593750000e+03 8.893766999244689941e-01 4.000000000000000000e+00 3.486355590820312500e+02 -7.975000000000000000e+01 4.725000000000000000e+01
5.600000000000000000e+01 8.597769230769232536e+02 3.836114501953125000e+02 7.717895507812500000e-01 0.000000000000000000e+00 0.000000000000000000e+00 2.582175537109375000e+03 8.913440704345703125e-01 4.000000000000000000e+00 2.873645324707031250e+02 -7.925000000000000000e+01 4.725000000000000000e+01
6.700000000000000000e+01 9.006307692307692605e+02 4.513585205078125000e+02 8.367614746093750000e-01 0.000000000000000000e+00 0.000000000000000000e+00 2.538529541015625000e+03 8.713122010231018066e-01 4.000000000000000000e+00 3.855780639648437500e+02 -7.775000000000000000e+01 4.725000000000000000e+01
6.700000000000000000e+01 9.143615384615385437e+02 4.696389465332031250e+02 9.099426269531250000e-01 0.000000000000000000e+00 0.000000000000000000e+00 2.505026367187500000e+03 8.673999905586242676e-01 4.000000000000000000e+00 3.683796386718750000e+02 -7.675000000000000000e+01 4.725000000000000000e+01
6.400000000000000000e+01 9.447769230769229125e+02 4.909011840820312500e+02 8.897399902343750000e-01 0.000000000000000000e+00 0.000000000000000000e+00 2.482014892578125000e+03 8.614479303359985352e-01 4.000000000000000000e+00 4.209559631347656250e+02 -7.625000000000000000e+01 4.725000000000000000e+01
7.200000000000000000e+01 9.800846153846151765e+02 5.049811096191406250e+02 8.695373535156250000e-01 0.000000000000000000e+00 0.000000000000000000e+00 2.459003173828125000e+03 8.586788773536682129e-01 4.000000000000000000e+00 3.890644226074218750e+02 -7.575000000000000000e+01 4.725000000000000000e+01
7.000000000000000000e+01 1.007123076923077178e+03 5.121181640625000000e+02 8.493041992187500000e-01 0.000000000000000000e+00 0.000000000000000000e+00 2.435991455078125000e+03 8.547609448432922363e-01 4.000000000000000000e+00 4.071577148437500000e+02 -7.525000000000000000e+01 4.725000000000000000e+01
4.100000000000000000e+01 9.730538461538460524e+02 5.143192138671875000e+02 7.924194335937500000e-01 0.000000000000000000e+00 0.000000000000000000e+00 2.413423828125000000e+03 8.563928604125976562e-01 3.000000000000000000e+00 3.960454101562500000e+02 -7.475000000000000000e+01 4.725000000000000000e+01
6.400000000000000000e+01 9.274230769230764508e+02 5.041289978027343750e+02 6.988220214843750000e-01 0.000000000000000000e+00 0.000000000000000000e+00 2.391300292968750000e+03 8.587362766265869141e-01 4.000000000000000000e+00 4.463867797851562500e+02 -7.425000000000000000e+01 4.725000000000000000e+01
4.900000000000000000e+01 9.696461538461537657e+02 4.399957275390625000e+02 5.116271972656250000e-01 0.000000000000000000e+00 0.000000000000000000e+00 2.347053222656250000e+03 8.642186522483825684e-01 4.000000000000000000e+00 4.327992248535156250e+02 -7.325000000000000000e+01 4.725000000000000000e+01
6.800000000000000000e+01 1.171684615384614744e+03 4.368004455566406250e+02 3.402709960937500000e-01 0.000000000000000000e+00 0.000000000000000000e+00 2.322759277343750000e+03 8.510531187057495117e-01 4.000000000000000000e+00 3.783077697753906250e+02 -7.225000000000000000e+01 4.725000000000000000e+01
6.900000000000000000e+01 1.405961538461538794e+03 4.194351806640625000e+02 2.557373046875000000e-01 0.000000000000000000e+00 0.000000000000000000e+00 2.312037597656250000e+03 8.666385412216186523e-01 4.000000000000000000e+00 6.371687011718750000e+02 -7.175000000000000000e+01 4.725000000000000000e+01
6.500000000000000000e+01 1.516692307692307168e+03 4.642279663085937500e+02 1.712036132812500000e-01 0.000000000000000000e+00 0.000000000000000000e+00 2.301315673828125000e+03 1.458536028861999512e+00 4.000000000000000000e+00 7.069932861328125000e+02 -7.125000000000000000e+01 4.725000000000000000e+01
6.000000000000000000e+01 1.068992307692308032e+03 5.042595520019531250e+02 2.120971679687500000e-01 0.000000000000000000e+00 0.000000000000000000e+00 2.334805175781250000e+03 8.628196716308593750e-01 4.000000000000000000e+00 4.391430358886718750e+02 -6.975000000000000000e+01 4.725000000000000000e+01
4.400000000000000000e+01 1.091561538461538476e+03 4.795522155761718750e+02 2.700805664062500000e-01 0.000000000000000000e+00 0.000000000000000000e+00 2.351626464843750000e+03 8.640120625495910645e-01 3.000000000000000000e+00 2.346651763916015625e+02 -6.925000000000000000e+01 4.725000000000000000e+01
7.100000000000000000e+01 1.105092307692307713e+03 5.009942626953125000e+02 4.610900878906250000e-01 0.000000000000000000e+00 0.000000000000000000e+00 2.385421875000000000e+03 8.686634898185729980e-01 4.000000000000000000e+00 2.138042907714843750e+02 -6.875000000000000000e+01 4.725000000000000000e+01
4.500000000000000000e+01 1.183815384615384573e+03 5.125113525390625000e+02 6.520996093750000000e-01 0.000000000000000000e+00 0.000000000000000000e+00 2.419217285156250000e+03 8.714690208435058594e-01 4.000000000000000000e+00 2.268648529052734375e+02 -6.825000000000000000e+01 4.725000000000000000e+01
5.300000000000000000e+01 1.188453846153845916e+03 5.187390136718750000e+02 8.431091308593750000e-01 0.000000000000000000e+00 0.000000000000000000e+00 2.453012939453125000e+03 8.615052700042724609e-01 4.000000000000000000e+00 2.752957763671875000e+02 -6.775000000000000000e+01 4.725000000000000000e+01
6.900000000000000000e+01 1.135869230769230853e+03 5.112964782714843750e+02 1.525146484375000000e+00 0.000000000000000000e+00 0.000000000000000000e+00 2.530219970703125000e+03 9.722833633422851562e-01 4.000000000000000000e+00 5.341102294921875000e+02 -6.675000000000000000e+01 4.725000000000000000e+01
6.700000000000000000e+01 1.149669230769231035e+03 4.513184814453125000e+02 1.916168212890625000e+00 0.000000000000000000e+00 0.000000000000000000e+00 2.570426513671875000e+03 1.132181882858276367e+00 4.000000000000000000e+00 4.215828247070312500e+02 -6.625000000000000000e+01 4.725000000000000000e+01
7.000000000000000000e+01 1.126253846153846780e+03 4.049521484375000000e+02 2.307159423828125000e+00 0.000000000000000000e+00 0.000000000000000000e+00 2.610632812500000000e+03 1.971025943756103516e+00 4.000000000000000000e+00 1.119939270019531250e+02 -6.575000000000000000e+01 4.725000000000000000e+01
5.800000000000000000e+01 1.381523076923077724e+03 5.982340698242187500e+02 5.068115234375000000e+00 0.000000000000000000e+00 0.000000000000000000e+00 2.257604492187500000e+03 1.473722338676452637e+00 4.000000000000000000e+00 1.174912033081054688e+02 -5.325000000000000000e+01 4.725000000000000000e+01
4.900000000000000000e+01 6.702230769230770875e+02 2.818546752929687500e+02 1.895507812500000000e+00 0.000000000000000000e+00 0.000000000000000000e+00 2.953149169921875000e+03 3.640232801437377930e+00 4.000000000000000000e+00 4.087915954589843750e+02 -9.475000000000000000e+01 4.775000000000000000e+01
5.500000000000000000e+01 6.885538461538466208e+02 2.868981933593750000e+02 1.734680175781250000e+00 0.000000000000000000e+00 0.000000000000000000e+00 2.916432861328125000e+03 3.297451972961425781e+00 4.000000000000000000e+00 4.250120849609375000e+02 -9.425000000000000000e+01 4.775000000000000000e+01
6.200000000000000000e+01 7.082230769230770875e+02 2.757444763183593750e+02 1.573852539062500000e+00 0.000000000000000000e+00 0.000000000000000000e+00 2.879716796875000000e+03 3.065925121307373047e+00 4.000000000000000000e+00 4.117576904296875000e+02 -9.375000000000000000e+01 4.775000000000000000e+01
5.400000000000000000e+01 7.210076923076928779e+02 2.795082397460937500e+02 1.575866699218750000e+00 0.000000000000000000e+00 0.000000000000000000e+00 2.861714111328125000e+03 9.306757450103759766e-01 4.000000000000000000e+00 4.182876586914062500e+02 -9.325000000000000000e+01 4.775000000000000000e+01
4.200000000000000000e+01 7.221846153846155403e+02 2.791447753906250000e+02 1.577850341796875000e+00 0.000000000000000000e+00 0.000000000000000000e+00 2.843711425781250000e+03 2.945314407348632812e+00 3.000000000000000000e+00 4.110904235839843750e+02 -9.275000000000000000e+01 4.775000000000000000e+01
4.300000000000000000e+01 7.735538461538460524e+02 3.231615295410156250e+02 1.579833984375000000e+00 0.000000000000000000e+00 0.000000000000000000e+00 2.825708740234375000e+03 1.046831488609313965e+00 3.000000000000000000e+00 4.518666687011718750e+02 -9.225000000000000000e+01 4.775000000000000000e+01
5.500000000000000000e+01 8.099307692307691013e+02 3.381897583007812500e+02 1.638488769531250000e+00 0.000000000000000000e+00 0.000000000000000000e+00 2.816566406250000000e+03 8.715430498123168945e-01 4.000000000000000000e+00 4.539009399414062500e+02 -9.175000000000000000e+01 4.775000000000000000e+01
5.000000000000000000e+01 9.768846153846156994e+02 3.603787841796875000e+02 1.794464111328125000e+00 0.000000000000000000e+00 0.000000000000000000e+00 2.626537597656250000e+03 8.470058441162109375e-01 4.000000000000000000e+00 4.576498413085937500e+02 -8.425000000000000000e+01 4.775000000000000000e+01
5.200000000000000000e+01 9.597230769230772012e+02 3.880208129882812500e+02 1.497467041015625000e+00 0.000000000000000000e+00 0.000000000000000000e+00 2.602334960937500000e+03 8.421140313148498535e-01 4.000000000000000000e+00 4.691658020019531250e+02 -8.375000000000000000e+01 4.775000000000000000e+01
4.700000000000000000e+01 9.212461538461541295e+02 3.994921875000000000e+02 1.200439453125000000e+00 0.000000000000000000e+00 0.000000000000000000e+00 2.578132568359375000e+03 8.492478728294372559e-01 4.000000000000000000e+00 4.470598754882812500e+02 -8.325000000000000000e+01 4.775000000000000000e+01
4.100000000000000000e+01 8.539461538461536065e+02 4.066480407714843750e+02 9.034118652343750000e-01 0.000000000000000000e+00 0.000000000000000000e+00 2.553930175781250000e+03 8.617883920669555664e-01 3.000000000000000000e+00 4.053765563964843750e+02 -8.275000000000000000e+01 4.775000000000000000e+01
6.400000000000000000e+01 8.551692307692306940e+02 4.011717834472656250e+02 3.759460449218750000e-01 0.000000000000000000e+00 0.000000000000000000e+00 2.516743164062500000e+03 8.689260482788085938e-01 4.000000000000000000e+00 3.657553100585937500e+02 -8.125000000000000000e+01 4.775000000000000000e+01
5.700000000000000000e+01 8.319307692307688740e+02 3.446793212890625000e+02 2.243652343750000000e-01 0.000000000000000000e+00 0.000000000000000000e+00 2.506708740234375000e+03 8.787941336631774902e-01 4.000000000000000000e+00 3.496452026367187500e+02 -8.075000000000000000e+01 4.775000000000000000e+01
4.900000000000000000e+01 8.264076923076924004e+02 2.664559936523437500e+02 1.775817871093750000e-01 0.000000000000000000e+00 0.000000000000000000e+00 2.496224609375000000e+03 8.826222419738769531e-01 4.000000000000000000e+00 3.043401794433593750e+02 -8.025000000000000000e+01 4.775000000000000000e+01
4.600000000000000000e+01 7.835384615384620020e+02 2.319402770996093750e+02 1.657104492187500000e-01 0.000000000000000000e+00 0.000000000000000000e+00 2.485590332031250000e+03 1.304239869117736816e+00 4.000000000000000000e+00 2.043472747802734375e+02 -7.975000000000000000e+01 4.775000000000000000e+01
6.400000000000000000e+01 9.128076923076927187e+02 4.064908752441406250e+02 1.419677734375000000e-01 0.000000000000000000e+00 0.000000000000000000e+00 2.464321777343750000e+03 8.646889925003051758e-01 4.000000000000000000e+00 2.978438415527343750e+02 -7.875000000000000000e+01 4.775000000000000000e+01
5.500000000000000000e+01 8.903230769230772239e+02 4.593966979980468750e+02 2.436218261718750000e-01 0.000000000000000000e+00 0.000000000000000000e+00 2.433589599609375000e+03 8.507869839668273926e-01 4.000000000000000000e+00 3.342947082519531250e+02 -7.775000000000000000e+01 4.775000000000000000e+01
4.900000000000000000e+01 9.036615384615387256e+02 4.668569641113281250e+02 2.944641113281250000e-01 0.000000000000000000e+00 0.000000000000000000e+00 2.418223632812500000e+03 8.434401154518127441e-01 4.000000000000000000e+00 3.651304931640625000e+02 -7.725000000000000000e+01 4.775000000000000000e+01
3.200000000000000000e+01 9.186846153846156540e+02 4.749416503906250000e+02 3.300170898437500000e-01 0.000000000000000000e+00 0.000000000000000000e+00 2.401038574218750000e+03 8.388383388519287109e-01 3.000000000000000000e+00 3.790294189453125000e+02 -7.675000000000000000e+01 4.775000000000000000e+01
6.500000000000000000e+01 9.352230769230767464e+02 4.928973083496093750e+02 3.094787597656250000e-01 0.000000000000000000e+00 0.000000000000000000e+00 2.355754150390625000e+03 8.420259952545166016e-01 4.000000000000000000e+00 4.417263793945312500e+02 -7.575000000000000000e+01 4.775000000000000000e+01
6.200000000000000000e+01 9.342307692307696243e+02 4.861619262695312500e+02 2.552490234375000000e-01 0.000000000000000000e+00 0.000000000000000000e+00 2.311592285156250000e+03 8.365178704261779785e-01 4.000000000000000000e+00 4.818663024902343750e+02 -7.475000000000000000e+01 4.775000000000000000e+01
6.100000000000000000e+01 1.082484615384615154e+03 4.646333923339843750e+02 -1.196594238281250000e-01 0.000000000000000000e+00 0.000000000000000000e+00 2.227712402343750000e+03 8.425759077072143555e-01 4.000000000000000000e+00 4.381774291992187500e+02 -7.225000000000000000e+01 4.775000000000000000e+01
6.700000000000000000e+01 1.278784615384614881e+03 5.230244750976562500e+02 -1.895446777343750000e-01 0.000000000000000000e+00 0.000000000000000000e+00 2.217662109375000000e+03 1.243892550468444824e+00 4.000000000000000000e+00 5.428207397460937500e+02 -7.175000000000000000e+01 4.775000000000000000e+01
6.300000000000000000e+01 1.303415384615384710e+03 5.600809326171875000e+02 -2.594299316406250000e-01 9.999999776482582092e-03 0.000000000000000000e+00 2.207611572265625000e+03 1.892581343650817871e+00 4.000000000000000000e+00 8.033743896484375000e+02 -7.125000000000000000e+01 4.775000000000000000e+01
6.300000000000000000e+01 1.360030769230769238e+03 5.550820312500000000e+02 -2.386474609375000000e-01 9.999999776482582092e-03 0.000000000000000000e+00 2.217881835937500000e+03 1.430768847465515137e+00 4.000000000000000000e+00 8.515111083984375000e+02 -7.075000000000000000e+01 4.775000000000000000e+01
6.200000000000000000e+01 1.026223076923077087e+03 5.339988403320312500e+02 -2.178955078125000000e-01 0.000000000000000000e+00 0.000000000000000000e+00 2.228151855468750000e+03 8.193493485450744629e-01 4.000000000000000000e+00 3.814985961914062500e+02 -7.025000000000000000e+01 4.775000000000000000e+01
5.900000000000000000e+01 1.222253846153845871e+03 4.857517700195312500e+02 2.503051757812500000e-01 0.000000000000000000e+00 0.000000000000000000e+00 2.318682861328125000e+03 8.383757472038269043e-01 4.000000000000000000e+00 4.461314086914062500e+02 -6.825000000000000000e+01 4.775000000000000000e+01
7.300000000000000000e+01 1.214476923076922958e+03 5.099122924804687500e+02 4.422302246093750000e-01 0.000000000000000000e+00 0.000000000000000000e+00 2.350930908203125000e+03 8.261673450469970703e-01 4.000000000000000000e+00 4.123943786621093750e+02 -6.775000000000000000e+01 4.775000000000000000e+01
6.900000000000000000e+01 1.092699999999999591e+03 5.226434936523437500e+02 7.376403808593750000e-01 0.000000000000000000e+00 0.000000000000000000e+00 2.387076171875000000e+03 8.245337009429931641e-01 4.000000000000000000e+00 3.018760375976562500e+02 -6.725000000000000000e+01 4.775000000000000000e+01
2.900000000000000000e+01 1.115076923076923094e+03 5.218125000000000000e+02 1.136474609375000000e+00 0.000000000000000000e+00 0.000000000000000000e+00 2.427118896484375000e+03 8.309354186058044434e-01 3.000000000000000000e+00 2.329541320800781250e+02 -6.675000000000000000e+01 4.775000000000000000e+01
2.100000000000000000e+01 1.467961538461537430e+03 5.093490600585937500e+02 4.296600341796875000e+00 0.000000000000000000e+00 0.000000000000000000e+00 2.262345947265625000e+03 1.836286544799804688e+00 3.000000000000000000e+00 1.876552581787109375e+02 -5.775000000000000000e+01 4.775000000000000000e+01
4.900000000000000000e+01 1.607184615384615199e+03 5.522260742187500000e+02 4.346923828125000000e+00 0.000000000000000000e+00 0.000000000000000000e+00 2.288502929687500000e+03 1.993871450424194336e+00 4.000000000000000000e+00 2.181236419677734375e+02 -5.575000000000000000e+01 4.775000000000000000e+01
1.700000000000000000e+01 1.445769230769230944e+03 5.596926879882812500e+02 4.455688476562500000e+00 0.000000000000000000e+00 0.000000000000000000e+00 2.298582519531250000e+03 1.866452932357788086e+00 2.000000000000000000e+00 2.057682342529296875e+02 -5.475000000000000000e+01 4.775000000000000000e+01
5.400000000000000000e+01 6.941769230769228898e+02 2.720036010742187500e+02 1.243804931640625000e+00 0.000000000000000000e+00 0.000000000000000000e+00 2.816271240234375000e+03 9.346514344215393066e-01 4.000000000000000000e+00 3.700046997070312500e+02 -9.425000000000000000e+01 4.825000000000000000e+01
5.800000000000000000e+01 7.060230769230767010e+02 2.905076904296875000e+02 1.075653076171875000e+00 0.000000000000000000e+00 0.000000000000000000e+00 2.778489501953125000e+03 9.319379925727844238e-01 4.000000000000000000e+00 3.648097534179687500e+02 -9.375000000000000000e+01 4.825000000000000000e+01
5.100000000000000000e+01 7.061538461538465299e+02 2.849422912597656250e+02 1.072784423828125000e+00 0.000000000000000000e+00 0.000000000000000000e+00 2.757471435546875000e+03 9.185824990272521973e-01 4.000000000000000000e+00 3.896738891601562500e+02 -9.325000000000000000e+01 4.825000000000000000e+01
5.000000000000000000e+01 7.445769230769235492e+02 2.575751037597656250e+02 1.069915771484375000e+00 0.000000000000000000e+00 0.000000000000000000e+00 2.736453613281250000e+03 9.597800374031066895e-01 4.000000000000000000e+00 4.124656372070312500e+02 -9.275000000000000000e+01 4.825000000000000000e+01
5.700000000000000000e+01 7.898538461538463480e+02 2.839342956542968750e+02 1.067016601562500000e+00 0.000000000000000000e+00 0.000000000000000000e+00 2.715435546875000000e+03 8.828623294830322266e-01 4.000000000000000000e+00 3.771672363281250000e+02 -9.225000000000000000e+01 4.825000000000000000e+01
5.700000000000000000e+01 8.338692307692310806e+02 2.978247070312500000e+02 1.116790771484375000e+00 0.000000000000000000e+00 0.000000000000000000e+00 2.701898193359375000e+03 2.095458269119262695e+00 4.000000000000000000e+00 4.152086486816406250e+02 -9.175000000000000000e+01 4.825000000000000000e+01
5.400000000000000000e+01 7.930461538461532882e+02 2.955744628906250000e+02 1.740051269531250000e+00 0.000000000000000000e+00 0.000000000000000000e+00 2.728610107421875000e+03 8.448252677917480469e-01 4.000000000000000000e+00 4.892805480957031250e+02 -9.025000000000000000e+01 4.825000000000000000e+01
5.100000000000000000e+01 7.698923076923075541e+02 3.203832092285156250e+02 1.875549316406250000e+00 0.000000000000000000e+00 0.000000000000000000e+00 2.649788085937500000e+03 8.561805486679077148e-01 4.000000000000000000e+00 3.906882019042968750e+02 -8.975000000000000000e+01 4.825000000000000000e+01
6.200000000000000000e+01 9.352923076923078725e+02 3.838340454101562500e+02 1.892578125000000000e+00 0.000000000000000000e+00 0.000000000000000000e+00 2.512354980468750000e+03 1.003752946853637695e+00 4.000000000000000000e+00 4.753412780761718750e+02 -8.575000000000000000e+01 4.825000000000000000e+01
5.400000000000000000e+01 9.354923076923076906e+02 3.595880126953125000e+02 1.613586425781250000e+00 0.000000000000000000e+00 0.000000000000000000e+00 2.511989501953125000e+03 1.389614820480346680e+00 4.000000000000000000e+00 4.522672424316406250e+02 -8.525000000000000000e+01 4.825000000000000000e+01
4.400000000000000000e+01 9.733461538461538112e+02 3.371981506347656250e+02 1.334625244140625000e+00 0.000000000000000000e+00 0.000000000000000000e+00 2.511623779296875000e+03 1.131552338600158691e+00 3.000000000000000000e+00 3.897495117187500000e+02 -8.475000000000000000e+01 4.825000000000000000e+01
6.200000000000000000e+01 9.742230769230767464e+02 3.495855102539062500e+02 1.052490234375000000e+00 0.000000000000000000e+00 0.000000000000000000e+00 2.505650878906250000e+03 8.203519582748413086e-01 4.000000000000000000e+00 3.649282836914062500e+02 -8.425000000000000000e+01 4.825000000000000000e+01
5.800000000000000000e+01 8.992923076923071903e+02 3.817747192382812500e+02 7.609558105468750000e-01 0.000000000000000000e+00 0.000000000000000000e+00 2.482855224609375000e+03 8.217586874961853027e-01 4.000000000000000000e+00 3.962853088378906250e+02 -8.375000000000000000e+01 4.825000000000000000e+01
6.100000000000000000e+01 8.854076923076926278e+02 4.042376708984375000e+02 4.693908691406250000e-01 0.000000000000000000e+00 0.000000000000000000e+00 2.460059814453125000e+03 8.298470377922058105e-01 4.000000000000000000e+00 3.883303222656250000e+02 -8.325000000000000000e+01 4.825000000000000000e+01
4.400000000000000000e+01 8.591461538461534246e+02 4.178525390625000000e+02 1.778564453125000000e-01 0.000000000000000000e+00 0.000000000000000000e+00 2.437264404296875000e+03 8.414035439491271973e-01 3.000000000000000000e+00 3.520365600585937500e+02 -8.275000000000000000e+01 4.825000000000000000e+01
6.600000000000000000e+01 8.305923076923077133e+02 4.373612060546875000e+02 -1.671752929687500000e-01 0.000000000000000000e+00 0.000000000000000000e+00 2.412885253906250000e+03 8.582506179809570312e-01 4.000000000000000000e+00 3.541984252929687500e+02 -8.175000000000000000e+01 4.825000000000000000e+01
2.900000000000000000e+01 8.422538461538453021e+02 4.274512634277343750e+02 -2.999877929687500000e-01 0.000000000000000000e+00 0.000000000000000000e+00 2.404230957031250000e+03 8.676744103431701660e-01 3.000000000000000000e+00 3.217448730468750000e+02 -8.125000000000000000e+01 4.825000000000000000e+01
6.000000000000000000e+01 8.372769230769237083e+02 3.411484985351562500e+02 -4.655151367187500000e-01 0.000000000000000000e+00 0.000000000000000000e+00 2.386410644531250000e+03 8.580923676490783691e-01 4.000000000000000000e+00 3.293250427246093750e+02 -8.025000000000000000e+01 4.825000000000000000e+01
4.900000000000000000e+01 8.638230769230766555e+02 3.447168884277343750e+02 -4.648132324218750000e-01 0.000000000000000000e+00 0.000000000000000000e+00 2.377073730468750000e+03 8.535896539688110352e-01 4.000000000000000000e+00 3.167617797851562500e+02 -7.975000000000000000e+01 4.825000000000000000e+01
5.100000000000000000e+01 8.773307692307697607e+02 4.177413635253906250e+02 -4.641113281250000000e-01 0.000000000000000000e+00 0.000000000000000000e+00 2.367736816406250000e+03 8.501995205879211426e-01 4.000000000000000000e+00 3.283214111328125000e+02 -7.925000000000000000e+01 4.825000000000000000e+01
6.200000000000000000e+01 8.655538461538463935e+02 4.594786987304687500e+02 -4.634094238281250000e-01 0.000000000000000000e+00 0.000000000000000000e+00 2.358399902343750000e+03 8.474438786506652832e-01 4.000000000000000000e+00 3.142016601562500000e+02 -7.875000000000000000e+01 4.825000000000000000e+01
6.000000000000000000e+01 9.315461538461543114e+02 4.701307067871093750e+02 -2.925415039062500000e-01 0.000000000000000000e+00 0.000000000000000000e+00 2.313774902343750000e+03 8.354665637016296387e-01 4.000000000000000000e+00 3.386366271972656250e+02 -7.725000000000000000e+01 4.825000000000000000e+01
6.200000000000000000e+01 9.294307692307694424e+02 4.728047790527343750e+02 -2.499084472656250000e-01 0.000000000000000000e+00 0.000000000000000000e+00 2.297050537109375000e+03 8.162196874618530273e-01 4.000000000000000000e+00 3.585451965332031250e+02 -7.675000000000000000e+01 4.825000000000000000e+01
6.900000000000000000e+01 9.542923076923078725e+02 4.874270935058593750e+02 -2.508544921875000000e-01 0.000000000000000000e+00 0.000000000000000000e+00 2.230232666015625000e+03 1.673174500465393066e+00 4.000000000000000000e+00 4.253572082519531250e+02 -7.525000000000000000e+01 4.825000000000000000e+01
4.400000000000000000e+01 9.550538461538461661e+02 4.788467102050781250e+02 -2.819519042968750000e-01 0.000000000000000000e+00 0.000000000000000000e+00 2.209760742187500000e+03 1.089130163192749023e+00 3.000000000000000000e+00 4.330767822265625000e+02 -7.475000000000000000e+01 4.825000000000000000e+01
5.600000000000000000e+01 9.458384615384613880e+02 4.728385620117187500e+02 -3.437805175781250000e-01 0.000000000000000000e+00 0.000000000000000000e+00 2.191089599609375000e+03 1.314926862716674805e+00 4.000000000000000000e+00 4.692007446289062500e+02 -7.425000000000000000e+01 4.825000000000000000e+01
6.500000000000000000e+01 9.724230769230766782e+02 4.639788208007812500e+02 -4.056396484375000000e-01 9.999999776482582092e-03 0.000000000000000000e+00 2.172418212890625000e+03 1.924251198768615723e+00 4.000000000000000000e+00 5.469418945312500000e+02 -7.375000000000000000e+01 4.825000000000000000e+01
6.500000000000000000e+01 9.806538461538459615e+02 4.632419128417968750e+02 -5.795898437500000000e-01 0.000000000000000000e+00 0.000000000000000000e+00 2.132665771484375000e+03 8.329255580902099609e-01 4.000000000000000000e+00 3.408696289062500000e+02 -7.225000000000000000e+01 4.825000000000000000e+01
6.800000000000000000e+01 1.089738461538461479e+03 4.775076904296875000e+02 -6.348266601562500000e-01 0.000000000000000000e+00 0.000000000000000000e+00 2.123286621093750000e+03 8.173902630805969238e-01 4.000000000000000000e+00 3.695540771484375000e+02 -7.175000000000000000e+01 4.825000000000000000e+01
6.100000000000000000e+01 1.085699999999999818e+03 4.898060607910156250e+02 -6.900634765625000000e-01 0.000000000000000000e+00 0.000000000000000000e+00 2.113907470703125000e+03 8.191225528717041016e-01 4.000000000000000000e+00 3.328840026855468750e+02 -7.125000000000000000e+01 4.825000000000000000e+01
6.300000000000000000e+01 1.074238461538462161e+03 4.881461791992187500e+02 -6.621398925781250000e-01 0.000000000000000000e+00 0.000000000000000000e+00 2.123284667968750000e+03 8.120300173759460449e-01 4.000000000000000000e+00 2.559029388427734375e+02 -7.075000000000000000e+01 4.825000000000000000e+01
6.100000000000000000e+01 1.163861538461538430e+03 4.790257568359375000e+02 -6.342468261718750000e-01 0.000000000000000000e+00 0.000000000000000000e+00 2.132661621093750000e+03 7.995492219924926758e-01 4.000000000000000000e+00 2.790186157226562500e+02 -7.025000000000000000e+01 4.825000000000000000e+01
4.900000000000000000e+01 1.088330769230769420e+03 4.734266967773437500e+02 -6.063232421875000000e-01 0.000000000000000000e+00 0.000000000000000000e+00 2.142038818359375000e+03 8.283311128616333008e-01 4.000000000000000000e+00 1.893049163818359375e+02 -6.975000000000000000e+01 4.825000000000000000e+01
5.300000000000000000e+01 1.202023076923076587e+03 4.707916564941406250e+02 -1.514892578125000000e-01 0.000000000000000000e+00 0.000000000000000000e+00 2.218148193359375000e+03 8.262496590614318848e-01 4.000000000000000000e+00 3.307704772949218750e+02 -6.825000000000000000e+01 4.825000000000000000e+01
6.600000000000000000e+01 1.223353846153846689e+03 4.924128723144531250e+02 4.138183593750000000e-02 0.000000000000000000e+00 0.000000000000000000e+00 2.248849121093750000e+03 8.194483518600463867e-01 4.000000000000000000e+00 3.514015808105468750e+02 -6.775000000000000000e+01 4.825000000000000000e+01
7.100000000000000000e+01 1.122346153846153584e+03 5.027355346679687500e+02 3.411254882812500000e-01 0.000000000000000000e+00 0.000000000000000000e+00 2.284138916015625000e+03 8.187907338142395020e-01 4.000000000000000000e+00 2.681500244140625000e+02 -6.725000000000000000e+01 4.825000000000000000e+01
7.000000000000000000e+01 1.149999999999999773e+03 5.037157897949218750e+02 7.478332519531250000e-01 0.000000000000000000e+00 0.000000000000000000e+00 2.324017822265625000e+03 8.149830102920532227e-01 4.000000000000000000e+00 4.225621337890625000e+02 -6.675000000000000000e+01 4.825000000000000000e+01
6.900000000000000000e+01 1.145176923076923686e+03 5.139420166015625000e+02 1.154510498046875000e+00 0.000000000000000000e+00 0.000000000000000000e+00 2.363896728515625000e+03 8.372372388839721680e-01 4.000000000000000000e+00 4.232078552246093750e+02 -6.625000000000000000e+01 4.825000000000000000e+01
5.000000000000000000e+01 1.232976923076922731e+03 5.517775878906250000e+02 2.031585693359375000e+00 0.000000000000000000e+00 0.000000000000000000e+00 2.388236572265625000e+03 8.345665335655212402e-01 4.000000000000000000e+00 4.195555114746093750e+02 -6.525000000000000000e+01 4.825000000000000000e+01
1.100000000000000000e+01 1.255276923076924049e+03 5.910411987304687500e+02 3.839111328125000000e+00 0.000000000000000000e+00 0.000000000000000000e+00 2.215623046875000000e+03 1.812077283859252930e+00 2.000000000000000000e+00 4.696336364746093750e+02 -5.825000000000000000e+01 4.825000000000000000e+01
4.700000000000000000e+01 1.315015384615384619e+03 5.789090576171875000e+02 3.777160644531250000e+00 0.000000000000000000e+00 0.000000000000000000e+00 2.220153808593750000e+03 1.814526915550231934e+00 4.000000000000000000e+00 3.627439270019531250e+02 -5.775000000000000000e+01 4.825000000000000000e+01
2.200000000000000000e+01 1.278523076923077497e+03 5.729507446289062500e+02 3.764129638671875000e+00 0.000000000000000000e+00 0.000000000000000000e+00 2.227177001953125000e+03 1.887472867965698242e+00 3.000000000000000000e+00 3.640198669433593750e+02 -5.725000000000000000e+01 4.825000000000000000e+01
3.500000000000000000e+01 1.358600000000000136e+03 5.763348388671875000e+02 3.738067626953125000e+00 0.000000000000000000e+00 0.000000000000000000e+00 2.241223388671875000e+03 1.939140796661376953e+00 3.000000000000000000e+00 2.714124145507812500e+02 -5.625000000000000000e+01 4.825000000000000000e+01
3.600000000000000000e+01 1.401799999999999727e+03 5.735719604492187500e+02 3.803314208984375000e+00 0.000000000000000000e+00 0.000000000000000000e+00 2.246427490234375000e+03 1.993491291999816895e+00 3.000000000000000000e+00 2.343341522216796875e+02 -5.575000000000000000e+01 4.825000000000000000e+01
2.000000000000000000e+01 1.396123076923076496e+03 5.737103881835937500e+02 3.868560791015625000e+00 0.000000000000000000e+00 0.000000000000000000e+00 2.251631591796875000e+03 1.712655782699584961e+00 3.000000000000000000e+00 2.352932434082031250e+02 -5.525000000000000000e+01 4.825000000000000000e+01
4.000000000000000000e+01 1.276923076923076451e+03 5.816057739257812500e+02 4.005767822265625000e+00 0.000000000000000000e+00 0.000000000000000000e+00 2.242748779296875000e+03 8.136433362960815430e-01 3.000000000000000000e+00 1.302368621826171875e+02 -5.425000000000000000e+01 4.825000000000000000e+01
4.200000000000000000e+01 7.656846153846153129e+02 2.934852600097656250e+02 5.769348144531250000e-01 0.000000000000000000e+00 0.000000000000000000e+00 2.636902587890625000e+03 1.743902564048767090e+00 3.000000000000000000e+00 3.807443542480468750e+02 -9.275000000000000000e+01 4.875000000000000000e+01
5.400000000000000000e+01 7.967615384615388621e+02 2.932876281738281250e+02 5.652770996093750000e-01 0.000000000000000000e+00 0.000000000000000000e+00 2.613681640625000000e+03 9.819247722625732422e-01 4.000000000000000000e+00 3.776227111816406250e+02 -9.225000000000000000e+01 4.875000000000000000e+01
5.200000000000000000e+01 8.401769230769234582e+02 3.007324523925781250e+02 6.009521484375000000e-01 0.000000000000000000e+00 0.000000000000000000e+00 2.596717285156250000e+03 1.528464317321777344e+00 4.000000000000000000e+00 4.070294494628906250e+02 -9.175000000000000000e+01 4.875000000000000000e+01
6.300000000000000000e+01 8.381076923076921048e+02 3.073057556152343750e+02 7.786865234375000000e-01 0.000000000000000000e+00 0.000000000000000000e+00 2.598522216796875000e+03 2.093606233596801758e+00 4.000000000000000000e+00 4.481235351562500000e+02 -9.125000000000000000e+01 4.875000000000000000e+01
6.500000000000000000e+01 8.178923076923078952e+02 3.294457397460937500e+02 1.134155273437500000e+00 0.000000000000000000e+00 0.000000000000000000e+00 2.602131835937500000e+03 1.781433701515197754e+00 4.000000000000000000e+00 4.933945312500000000e+02 -9.025000000000000000e+01 4.875000000000000000e+01
5.400000000000000000e+01 8.235384615384620020e+02 3.220508728027343750e+02 1.237609863281250000e+00 0.000000000000000000e+00 0.000000000000000000e+00 2.512681884765625000e+03 1.718945026397705078e+00 4.000000000000000000e+00 4.865958251953125000e+02 -8.975000000000000000e+01 4.875000000000000000e+01
6.300000000000000000e+01 7.872923076923077588e+02 3.207713317871093750e+02 1.266784667968750000e+00 0.000000000000000000e+00 0.000000000000000000e+00 2.331977294921875000e+03 1.582028031349182129e+00 4.000000000000000000e+00 4.775141601562500000e+02 -8.925000000000000000e+01 4.875000000000000000e+01
6.600000000000000000e+01 8.476846153846157677e+02 3.748545532226562500e+02 6.188354492187500000e-01 0.000000000000000000e+00 0.000000000000000000e+00 2.424813232421875000e+03 1.988097429275512695e+00 4.000000000000000000e+00 3.724656066894531250e+02 -8.475000000000000000e+01 4.875000000000000000e+01
5.000000000000000000e+01 8.909461538461539476e+02 3.915906677246093750e+02 9.069824218750000000e-02 0.000000000000000000e+00 0.000000000000000000e+00 2.382704833984375000e+03 8.322681188583374023e-01 4.000000000000000000e+00 3.251567687988281250e+02 -8.375000000000000000e+01 4.875000000000000000e+01
5.200000000000000000e+01 8.390692307692303302e+02 4.121239318847656250e+02 -1.675415039062500000e-01 0.000000000000000000e+00 0.000000000000000000e+00 2.363337646484375000e+03 8.314341306686401367e-01 4.000000000000000000e+00 3.232625122070312500e+02 -8.325000000000000000e+01 4.875000000000000000e+01
6.900000000000000000e+01 8.361846153846149718e+02 4.251931457519531250e+02 -4.257812500000000000e-01 0.000000000000000000e+00 0.000000000000000000e+00 2.343970214843750000e+03 8.378474712371826172e-01 4.000000000000000000e+00 3.069476318359375000e+02 -8.275000000000000000e+01 4.875000000000000000e+01
2.600000000000000000e+01 8.193230769230771102e+02 4.381427917480468750e+02 -6.081237792968750000e-01 0.000000000000000000e+00 0.000000000000000000e+00 2.330743896484375000e+03 8.431279063224792480e-01 3.000000000000000000e+00 2.806641235351562500e+02 -8.225000000000000000e+01 4.875000000000000000e+01
5.000000000000000000e+01 8.190076923076923094e+02 4.495148315429687500e+02 -7.145996093750000000e-01 0.000000000000000000e+00 0.000000000000000000e+00 2.323658447265625000e+03 8.466758728027343750e-01 4.000000000000000000e+00 3.063881835937500000e+02 -8.175000000000000000e+01 4.875000000000000000e+01
6.800000000000000000e+01 8.327230769230773149e+02 4.522370300292968750e+02 -8.210754394531250000e-01 0.000000000000000000e+00 0.000000000000000000e+00 2.316572998046875000e+03 8.496609926223754883e-01 4.000000000000000000e+00 2.842149353027343750e+02 -8.125000000000000000e+01 4.875000000000000000e+01
5.300000000000000000e+01 7.844769230769231854e+02 4.393803405761718750e+02 -9.275817871093750000e-01 0.000000000000000000e+00 0.000000000000000000e+00 2.309487548828125000e+03 2.208610057830810547e+00 4.000000000000000000e+00 2.851445007324218750e+02 -8.075000000000000000e+01 4.875000000000000000e+01
3.500000000000000000e+01 8.692692307692309441e+02 4.544194946289062500e+02 -9.445800781250000000e-01 0.000000000000000000e+00 0.000000000000000000e+00 2.282124023437500000e+03 2.954519748687744141e+00 3.000000000000000000e+00 2.771963806152343750e+02 -7.925000000000000000e+01 4.875000000000000000e+01
3.900000000000000000e+01 8.796692307692305803e+02 4.685261535644531250e+02 -9.410705566406250000e-01 0.000000000000000000e+00 0.000000000000000000e+00 2.272817871093750000e+03 9.172104597091674805e-01 3.000000000000000000e+00 3.135198669433593750e+02 -7.875000000000000000e+01 4.875000000000000000e+01
6.400000000000000000e+01 8.800307692307688967e+02 4.663063659667968750e+02 -8.997192382812500000e-01 0.000000000000000000e+00 0.000000000000000000e+00 2.256313964843750000e+03 1.140908479690551758e+00 4.000000000000000000e+00 3.085361022949218750e+02 -7.825000000000000000e+01 4.875000000000000000e+01
6.800000000000000000e+01 8.956076923076919911e+02 4.659923400878906250e+02 -8.170166015625000000e-01 0.000000000000000000e+00 0.000000000000000000e+00 2.223306396484375000e+03 8.166640400886535645e-01 4.000000000000000000e+00 3.030991821289062500e+02 -7.725000000000000000e+01 4.875000000000000000e+01
2.400000000000000000e+01 9.550230769230765873e+02 4.397765808105468750e+02 -1.010253906250000000e+00 9.999999776482582092e-03 0.000000000000000000e+00 2.060018798828125000e+03 1.325016379356384277e+00 3.000000000000000000e+00 5.566351318359375000e+02 -7.325000000000000000e+01 4.875000000000000000e+01
5.700000000000000000e+01 8.947923076923075314e+02 4.403489379882812500e+02 -1.052398681640625000e+00 0.000000000000000000e+00 0.000000000000000000e+00 2.048578613281250000e+03 1.049268126487731934e+00 4.000000000000000000e+00 2.467613983154296875e+02 -7.275000000000000000e+01 4.875000000000000000e+01
6.600000000000000000e+01 1.094961538461538112e+03 4.347026367187500000e+02 -1.166442871093750000e+00 0.000000000000000000e+00 0.000000000000000000e+00 2.021163452148437500e+03 1.112321734428405762e+00 4.000000000000000000e+00 3.124559936523437500e+02 -7.125000000000000000e+01 4.875000000000000000e+01
6.300000000000000000e+01 1.086076923076922867e+03 4.523085021972656250e+02 -1.130493164062500000e+00 9.999999776482582092e-03 0.000000000000000000e+00 2.029170410156250000e+03 1.936403274536132812e+00 4.000000000000000000e+00 6.773883056640625000e+02 -7.075000000000000000e+01 4.875000000000000000e+01
5.800000000000000000e+01 1.174315384615385028e+03 4.608168640136718750e+02 -1.094543457031250000e+00 9.999999776482582092e-03 0.000000000000000000e+00 2.037177490234375000e+03 1.361374258995056152e+00 4.000000000000000000e+00 6.630941162109375000e+02 -7.025000000000000000e+01 4.875000000000000000e+01
5.600000000000000000e+01 1.137061538461538930e+03 4.731344604492187500e+02 -1.058593750000000000e+00 0.000000000000000000e+00 0.000000000000000000e+00 2.045184570312500000e+03 7.994110584259033203e-01 4.000000000000000000e+00 3.482135009765625000e+02 -6.975000000000000000e+01 4.875000000000000000e+01
6.300000000000000000e+01 1.145838461538461843e+03 5.022133178710937500e+02 -1.372985839843750000e-01 0.000000000000000000e+00 0.000000000000000000e+00 2.175510009765625000e+03 1.038995623588562012e+00 4.000000000000000000e+00 3.110983276367187500e+02 -6.725000000000000000e+01 4.875000000000000000e+01
2.600000000000000000e+01 1.208000000000000227e+03 4.871895751953125000e+02 2.570800781250000000e-01 0.000000000000000000e+00 0.000000000000000000e+00 2.213376708984375000e+03 1.195668578147888184e+00 3.000000000000000000e+00 5.611240844726562500e+02 -6.675000000000000000e+01 4.875000000000000000e+01
6.300000000000000000e+01 1.253076923076922867e+03 4.971596679687500000e+02 6.514587402343750000e-01 0.000000000000000000e+00 0.000000000000000000e+00 2.251243408203125000e+03 8.938788771629333496e-01 4.000000000000000000e+00 3.931585388183593750e+02 -6.625000000000000000e+01 4.875000000000000000e+01
3.400000000000000000e+01 1.204330769230769647e+03 5.278962402343750000e+02 1.045867919921875000e+00 0.000000000000000000e+00 0.000000000000000000e+00 2.289110107421875000e+03 7.921564579010009766e-01 3.000000000000000000e+00 5.199870605468750000e+02 -6.575000000000000000e+01 4.875000000000000000e+01
5.000000000000000000e+01 1.180930769230769556e+03 5.565148315429687500e+02 1.506378173828125000e+00 0.000000000000000000e+00 0.000000000000000000e+00 2.279867431640625000e+03 7.957042455673217773e-01 4.000000000000000000e+00 4.247658996582031250e+02 -6.525000000000000000e+01 4.875000000000000000e+01
6.600000000000000000e+01 1.187815384615384573e+03 5.754304199218750000e+02 1.988922119140625000e+00 0.000000000000000000e+00 0.000000000000000000e+00 2.254921875000000000e+03 8.036502003669738770e-01 4.000000000000000000e+00 2.171273345947265625e+02 -6.475000000000000000e+01 4.875000000000000000e+01
5.000000000000000000e+01 1.160838461538461161e+03 5.859000244140625000e+02 3.309448242187500000e+00 0.000000000000000000e+00 0.000000000000000000e+00 2.132410156250000000e+03 1.969517230987548828e+00 4.000000000000000000e+00 2.921867370605468750e+02 -5.825000000000000000e+01 4.875000000000000000e+01
7.000000000000000000e+00 1.121976923076923413e+03 5.909415283203125000e+02 3.223968505859375000e+00 0.000000000000000000e+00 0.000000000000000000e+00 2.139426757812500000e+03 1.519392251968383789e+00 1.000000000000000000e+00 4.890669860839843750e+02 -5.725000000000000000e+01 4.875000000000000000e+01
6.600000000000000000e+01 1.134676923076923231e+03 5.812207031250000000e+02 3.191894531250000000e+00 0.000000000000000000e+00 0.000000000000000000e+00 2.147907958984375000e+03 1.948730230331420898e+00 4.000000000000000000e+00 2.246129150390625000e+02 -5.625000000000000000e+01 4.875000000000000000e+01
5.800000000000000000e+01 1.136076923076922640e+03 5.720255737304687500e+02 3.273681640625000000e+00 0.000000000000000000e+00 0.000000000000000000e+00 2.153154052734375000e+03 2.008877277374267578e+00 4.000000000000000000e+00 2.072796783447265625e+02 -5.575000000000000000e+01 4.875000000000000000e+01
3.800000000000000000e+01 1.188407692307692741e+03 5.780091552734375000e+02 3.355468750000000000e+00 0.000000000000000000e+00 0.000000000000000000e+00 2.158400146484375000e+03 2.023649454116821289e+00 3.000000000000000000e+00 2.823653869628906250e+02 -5.525000000000000000e+01 4.875000000000000000e+01
2.100000000000000000e+01 1.207984615384615608e+03 5.965772094726562500e+02 3.437255859375000000e+00 0.000000000000000000e+00 0.000000000000000000e+00 2.163645996093750000e+03 2.008907079696655273e+00 3.000000000000000000e+00 2.294651031494140625e+02 -5.475000000000000000e+01 4.875000000000000000e+01
6.400000000000000000e+01 7.391923076923077360e+02 3.228109436035156250e+02 1.657714843750000000e-01 0.000000000000000000e+00 0.000000000000000000e+00 2.599057617187500000e+03 2.229964971542358398e+00 4.000000000000000000e+00 3.797130432128906250e+02 -9.375000000000000000e+01 4.925000000000000000e+01
5.100000000000000000e+01 7.536615384615387256e+02 3.281007080078125000e+02 1.382446289062500000e-01 0.000000000000000000e+00 0.000000000000000000e+00 2.575084960937500000e+03 2.220333099365234375e+00 4.000000000000000000e+00 3.912229614257812500e+02 -9.325000000000000000e+01 4.925000000000000000e+01
4.800000000000000000e+01 7.627153846153848917e+02 3.214253845214843750e+02 1.107482910156250000e-01 0.000000000000000000e+00 0.000000000000000000e+00 2.551112060546875000e+03 2.191840171813964844e+00 4.000000000000000000e+00 4.321422729492187500e+02 -9.275000000000000000e+01 4.925000000000000000e+01
5.800000000000000000e+01 8.013999999999997499e+02 3.291920776367187500e+02 9.545898437500000000e-02 0.000000000000000000e+00 0.000000000000000000e+00 2.508476806640625000e+03 2.142397880554199219e+00 4.000000000000000000e+00 4.599570617675781250e+02 -9.175000000000000000e+01 4.925000000000000000e+01
5.000000000000000000e+01 8.144461538461540613e+02 3.338511352539062500e+02 2.267761230468750000e-01 0.000000000000000000e+00 0.000000000000000000e+00 2.505746582031250000e+03 2.106612205505371094e+00 4.000000000000000000e+00 4.646437377929687500e+02 -9.125000000000000000e+01 4.925000000000000000e+01
4.500000000000000000e+01 8.097307692307693969e+02 3.297027282714843750e+02 5.801391601562500000e-01 0.000000000000000000e+00 0.000000000000000000e+00 2.301189941406250000e+03 1.636946797370910645e+00 4.000000000000000000e+00 4.277769470214843750e+02 -8.925000000000000000e+01 4.925000000000000000e+01
5.000000000000000000e+01 8.257461538461537884e+02 3.937156066894531250e+02 6.032409667968750000e-01 0.000000000000000000e+00 0.000000000000000000e+00 2.188333251953125000e+03 1.952056288719177246e+00 4.000000000000000000e+00 4.123779296875000000e+02 -8.725000000000000000e+01 4.925000000000000000e+01
6.400000000000000000e+01 7.759923076923075769e+02 4.039267578125000000e+02 1.445617675781250000e-01 0.000000000000000000e+00 0.000000000000000000e+00 2.363205566406250000e+03 1.523413896560668945e+00 4.000000000000000000e+00 3.684986877441406250e+02 -8.525000000000000000e+01 4.925000000000000000e+01
3.400000000000000000e+01 7.335846153846148354e+02 3.970148315429687500e+02 -7.650756835937500000e-02 0.000000000000000000e+00 0.000000000000000000e+00 2.345647705078125000e+03 1.773223876953125000e+00 3.000000000000000000e+00 3.455503234863281250e+02 -8.475000000000000000e+01 4.925000000000000000e+01
4.600000000000000000e+01 7.916615384615387256e+02 3.963053588867187500e+02 -2.861022949218750000e-01 0.000000000000000000e+00 0.000000000000000000e+00 2.329396972656250000e+03 8.957246541976928711e-01 4.000000000000000000e+00 3.059250793457031250e+02 -8.425000000000000000e+01 4.925000000000000000e+01
6.500000000000000000e+01 8.295846153846151765e+02 4.077998962402343750e+02 -4.613037109375000000e-01 0.000000000000000000e+00 0.000000000000000000e+00 2.317066894531250000e+03 1.114793658256530762e+00 4.000000000000000000e+00 2.957686462402343750e+02 -8.375000000000000000e+01 4.925000000000000000e+01
6.700000000000000000e+01 8.500692307692307850e+02 4.221688232421875000e+02 -6.364746093750000000e-01 0.000000000000000000e+00 0.000000000000000000e+00 2.304736816406250000e+03 1.725010275840759277e+00 4.000000000000000000e+00 2.794913024902343750e+02 -8.325000000000000000e+01 4.925000000000000000e+01
4.000000000000000000e+01 8.176307692307689194e+02 4.326007080078125000e+02 -8.116455078125000000e-01 0.000000000000000000e+00 0.000000000000000000e+00 2.292406738281250000e+03 1.356175899505615234e+00 3.000000000000000000e+00 2.633078613281250000e+02 -8.275000000000000000e+01 4.925000000000000000e+01
3.500000000000000000e+01 7.988307692307693060e+02 4.375917663574218750e+02 -9.325256347656250000e-01 0.000000000000000000e+00 0.000000000000000000e+00 2.283651611328125000e+03 1.607346534729003906e+00 3.000000000000000000e+00 2.591428527832031250e+02 -8.225000000000000000e+01 4.925000000000000000e+01
5.400000000000000000e+01 8.028461538461538112e+02 4.423493652343750000e+02 -9.990844726562500000e-01 0.000000000000000000e+00 0.000000000000000000e+00 2.278471679687500000e+03 8.361105322837829590e-01 4.000000000000000000e+00 2.402050018310546875e+02 -8.175000000000000000e+01 4.925000000000000000e+01
5.700000000000000000e+01 8.190846153846159723e+02 4.489575500488281250e+02 -1.065643310546875000e+00 0.000000000000000000e+00 0.000000000000000000e+00 2.273291748046875000e+03 8.428258895874023438e-01 4.000000000000000000e+00 2.434719238281250000e+02 -8.125000000000000000e+01 4.925000000000000000e+01
7.100000000000000000e+01 8.275461538461541977e+02 4.507461242675781250e+02 -1.132202148437500000e+00 0.000000000000000000e+00 0.000000000000000000e+00 2.268111816406250000e+03 9.965552091598510742e-01 4.000000000000000000e+00 2.756149902343750000e+02 -8.075000000000000000e+01 4.925000000000000000e+01
7.100000000000000000e+01 8.260999999999996817e+02 4.515292663574218750e+02 -1.157226562500000000e+00 0.000000000000000000e+00 0.000000000000000000e+00 2.258164062500000000e+03 8.355590105056762695e-01 4.000000000000000000e+00 3.472778320312500000e+02 -8.025000000000000000e+01 4.925000000000000000e+01
4.800000000000000000e+01 8.114230769230767919e+02 4.552044982910156250e+02 -1.168395996093750000e+00 0.000000000000000000e+00 0.000000000000000000e+00 2.246627197265625000e+03 1.819547057151794434e+00 4.000000000000000000e+00 2.970032958984375000e+02 -7.975000000000000000e+01 4.925000000000000000e+01
6.300000000000000000e+01 8.355538461538460524e+02 4.603703613281250000e+02 -1.179565429687500000e+00 0.000000000000000000e+00 0.000000000000000000e+00 2.235090087890625000e+03 9.559422135353088379e-01 4.000000000000000000e+00 3.030541687011718750e+02 -7.925000000000000000e+01 4.925000000000000000e+01
6.100000000000000000e+01 8.520000000000001137e+02 4.633320922851562500e+02 -1.190734863281250000e+00 0.000000000000000000e+00 0.000000000000000000e+00 2.223552978515625000e+03 1.288546085357666016e+00 4.000000000000000000e+00 2.821734924316406250e+02 -7.875000000000000000e+01 4.925000000000000000e+01
4.500000000000000000e+01 8.597615384615388621e+02 4.606148986816406250e+02 -1.203765869140625000e+00 0.000000000000000000e+00 0.000000000000000000e+00 2.201635498046875000e+03 1.605650305747985840e+00 4.000000000000000000e+00 2.887521362304687500e+02 -7.825000000000000000e+01 4.925000000000000000e+01
2.500000000000000000e+01 8.474846153846154948e+02 4.560327148437500000e+02 -1.216796875000000000e+00 0.000000000000000000e+00 0.000000000000000000e+00 2.179717773437500000e+03 8.380243778228759766e-01 3.000000000000000000e+00 3.131561279296875000e+02 -7.775000000000000000e+01 4.925000000000000000e+01
3.700000000000000000e+01 8.482384615384614790e+02 4.500098571777343750e+02 -1.229827880859375000e+00 0.000000000000000000e+00 0.000000000000000000e+00 2.157800048828125000e+03 8.113615512847900391e-01 3.000000000000000000e+00 2.693034057617187500e+02 -7.725000000000000000e+01 4.925000000000000000e+01
6.000000000000000000e+01 8.673615384615386574e+02 4.495261535644531250e+02 -1.252166748046875000e+00 0.000000000000000000e+00 0.000000000000000000e+00 2.134825927734375000e+03 1.473204374313354492e+00 4.000000000000000000e+00 3.101013183593750000e+02 -7.675000000000000000e+01 4.925000000000000000e+01
4.900000000000000000e+01 8.670000000000001137e+02 4.849335632324218750e+02 -1.352600097656250000e+00 9.999999776482582092e-03 0.000000000000000000e+00 2.082540283203125000e+03 1.981702566146850586e+00 4.000000000000000000e+00 3.981425476074218750e+02 -7.575000000000000000e+01 4.925000000000000000e+01
5.400000000000000000e+01 1.030892307692307668e+03 4.438976745605468750e+02 -1.708312988281250000e+00 9.999999776482582092e-03 0.000000000000000000e+00 1.939799926757812500e+03 7.982945442199707031e-01 4.000000000000000000e+00 3.686542053222656250e+02 -7.175000000000000000e+01 4.925000000000000000e+01
6.600000000000000000e+01 1.097846153846154266e+03 4.487626953125000000e+02 -1.724517822265625000e+00 0.000000000000000000e+00 0.000000000000000000e+00 1.930133422851562500e+03 1.248808979988098145e+00 4.000000000000000000e+00 4.691609191894531250e+02 -7.125000000000000000e+01 4.925000000000000000e+01
5.600000000000000000e+01 1.081299999999999955e+03 4.725560913085937500e+02 -1.633361816406250000e+00 9.999999776482582092e-03 0.000000000000000000e+00 1.941703979492187500e+03 1.927409648895263672e+00 4.000000000000000000e+00 5.893591918945312500e+02 -7.025000000000000000e+01 4.925000000000000000e+01
6.500000000000000000e+01 1.064407692307692741e+03 4.841303710937500000e+02 -1.587799072265625000e+00 9.999999776482582092e-03 0.000000000000000000e+00 1.947489135742187500e+03 7.925474643707275391e-01 4.000000000000000000e+00 5.067434387207031250e+02 -6.975000000000000000e+01 4.925000000000000000e+01
5.700000000000000000e+01 1.099492307692308032e+03 4.872374877929687500e+02 -1.512359619140625000e+00 0.000000000000000000e+00 0.000000000000000000e+00 1.957735595703125000e+03 8.004487156867980957e-01 4.000000000000000000e+00 3.906955566406250000e+02 -6.925000000000000000e+01 4.925000000000000000e+01
6.000000000000000000e+01 1.081007692307691968e+03 4.964739074707031250e+02 -1.347473144531250000e+00 0.000000000000000000e+00 0.000000000000000000e+00 1.981365966796875000e+03 1.774352192878723145e+00 4.000000000000000000e+00 3.123943176269531250e+02 -6.875000000000000000e+01 4.925000000000000000e+01
2.600000000000000000e+01 1.144969230769231444e+03 5.746969604492187500e+02 2.671325683593750000e+00 0.000000000000000000e+00 0.000000000000000000e+00 1.973842041015625000e+03 1.965775966644287109e+00 3.000000000000000000e+00 2.326655883789062500e+02 -5.775000000000000000e+01 4.925000000000000000e+01
3.900000000000000000e+01 9.926692307692306940e+02 5.766830444335937500e+02 2.667694091796875000e+00 0.000000000000000000e+00 0.000000000000000000e+00 1.970360107421875000e+03 1.938250780105590820e+00 3.000000000000000000e+00 7.604179382324218750e+01 -5.725000000000000000e+01 4.925000000000000000e+01
5.400000000000000000e+01 1.011946153846153607e+03 5.690430297851562500e+02 2.664093017578125000e+00 0.000000000000000000e+00 0.000000000000000000e+00 1.966878295898437500e+03 1.882570624351501465e+00 4.000000000000000000e+00 4.239625854492187500e+02 -5.675000000000000000e+01 4.925000000000000000e+01
5.700000000000000000e+01 9.954384615384619792e+02 5.529704589843750000e+02 2.660491943359375000e+00 0.000000000000000000e+00 0.000000000000000000e+00 1.963396484375000000e+03 1.834379076957702637e+00 4.000000000000000000e+00 2.131301879882812500e+02 -5.625000000000000000e+01 4.925000000000000000e+01
5.800000000000000000e+01 1.063192307692308532e+03 5.699420166015625000e+02 2.985900878906250000e+00 0.000000000000000000e+00 0.000000000000000000e+00 1.978604736328125000e+03 2.018409252166748047e+00 4.000000000000000000e+00 5.556027603149414062e+01 -5.475000000000000000e+01 4.925000000000000000e+01
5.000000000000000000e+01 1.000115384615384642e+03 5.864233398437500000e+02 3.111480712890625000e+00 0.000000000000000000e+00 0.000000000000000000e+00 1.971827270507812500e+03 2.007260799407958984e+00 4.000000000000000000e+00 9.089691925048828125e+01 -5.425000000000000000e+01 4.925000000000000000e+01
4.700000000000000000e+01 6.080692307692308987e+02 2.728659057617187500e+02 6.387023925781250000e-01 0.000000000000000000e+00 0.000000000000000000e+00 2.702358154296875000e+03 1.353362083435058594e+00 4.000000000000000000e+00 2.861039428710937500e+02 -9.625000000000000000e+01 4.975000000000000000e+01
2.500000000000000000e+01 6.319846153846154948e+02 2.678446655273437500e+02 2.794494628906250000e-01 0.000000000000000000e+00 0.000000000000000000e+00 2.630720214843750000e+03 1.981481075286865234e+00 3.000000000000000000e+00 3.532848510742187500e+02 -9.525000000000000000e+01 4.975000000000000000e+01
5.400000000000000000e+01 7.042923076923073040e+02 3.560596008300781250e+02 -8.602905273437500000e-02 0.000000000000000000e+00 0.000000000000000000e+00 2.553421142578125000e+03 2.221317291259765625e+00 4.000000000000000000e+00 3.680946044921875000e+02 -9.425000000000000000e+01 4.975000000000000000e+01
5.200000000000000000e+01 7.693461538461535838e+02 3.687180786132812500e+02 -3.121032714843750000e-01 0.000000000000000000e+00 0.000000000000000000e+00 2.490046630859375000e+03 1.696764111518859863e+00 4.000000000000000000e+00 3.764473876953125000e+02 -9.325000000000000000e+01 4.975000000000000000e+01
5.900000000000000000e+01 8.092923076923082135e+02 3.804216308593750000e+02 -4.100341796875000000e-01 0.000000000000000000e+00 0.000000000000000000e+00 2.420236328125000000e+03 2.130308628082275391e+00 4.000000000000000000e+00 4.108291015625000000e+02 -9.175000000000000000e+01 4.975000000000000000e+01
3.200000000000000000e+01 8.251230769230770647e+02 3.734816589355468750e+02 -3.251342773437500000e-01 0.000000000000000000e+00 0.000000000000000000e+00 2.412970947265625000e+03 1.226900100708007812e+00 3.000000000000000000e+00 4.232942199707031250e+02 -9.125000000000000000e+01 4.975000000000000000e+01
6.300000000000000000e+01 8.269923076923078042e+02 3.586122436523437500e+02 -1.553039550781250000e-01 0.000000000000000000e+00 0.000000000000000000e+00 2.398439697265625000e+03 2.016369819641113281e+00 4.000000000000000000e+00 4.526364440917968750e+02 -9.025000000000000000e+01 4.975000000000000000e+01
6.700000000000000000e+01 7.867846153846151083e+02 3.701720581054687500e+02 -1.309204101562500000e-01 0.000000000000000000e+00 0.000000000000000000e+00 2.127083251953125000e+03 1.936460852622985840e+00 4.000000000000000000e+00 3.417568054199218750e+02 -8.775000000000000000e+01 4.975000000000000000e+01
3.800000000000000000e+01 7.707230769230767464e+02 3.897144165039062500e+02 -1.762390136718750000e-01 0.000000000000000000e+00 0.000000000000000000e+00 2.184799316406250000e+03 1.961840748786926270e+00 3.000000000000000000e+00 3.567284545898437500e+02 -8.725000000000000000e+01 4.975000000000000000e+01
6.000000000000000000e+01 7.631307692307693742e+02 3.979988098144531250e+02 -2.215270996093750000e-01 0.000000000000000000e+00 0.000000000000000000e+00 2.242515380859375000e+03 1.967552900314331055e+00 4.000000000000000000e+00 3.391959838867187500e+02 -8.675000000000000000e+01 4.975000000000000000e+01
3.800000000000000000e+01 7.690076923076923094e+02 4.022672729492187500e+02 -2.668457031250000000e-01 0.000000000000000000e+00 0.000000000000000000e+00 2.300231445312500000e+03 1.989164829254150391e+00 3.000000000000000000e+00 3.352409362792968750e+02 -8.625000000000000000e+01 4.975000000000000000e+01
3.000000000000000000e+01 7.343230769230768828e+02 4.037969360351562500e+02 -6.035156250000000000e-01 0.000000000000000000e+00 0.000000000000000000e+00 2.277732177734375000e+03 1.254659652709960938e+00 3.000000000000000000e+00 2.367754821777343750e+02 -8.525000000000000000e+01 4.975000000000000000e+01
5.700000000000000000e+01 7.155846153846157449e+02 4.018311767578125000e+02 -7.718505859375000000e-01 0.000000000000000000e+00 0.000000000000000000e+00 2.266482421875000000e+03 8.211613893508911133e-01 4.000000000000000000e+00 2.609778137207031250e+02 -8.475000000000000000e+01 4.975000000000000000e+01
4.300000000000000000e+01 7.747692307692303757e+02 4.121931762695312500e+02 -1.013275146484375000e+00 0.000000000000000000e+00 0.000000000000000000e+00 2.251428955078125000e+03 1.021412968635559082e+00 3.000000000000000000e+00 2.494102630615234375e+02 -8.375000000000000000e+01 4.975000000000000000e+01
6.800000000000000000e+01 8.006769230769233445e+02 4.253648681640625000e+02 -1.105407714843750000e+00 0.000000000000000000e+00 0.000000000000000000e+00 2.246135986328125000e+03 1.852591872215270996e+00 4.000000000000000000e+00 2.247770538330078125e+02 -8.325000000000000000e+01 4.975000000000000000e+01
6.400000000000000000e+01 7.995076923076920821e+02 4.360359191894531250e+02 -1.197540283203125000e+00 0.000000000000000000e+00 0.000000000000000000e+00 2.240843017578125000e+03 2.027420520782470703e+00 4.000000000000000000e+00 2.343563842773437500e+02 -8.275000000000000000e+01 4.975000000000000000e+01
5.700000000000000000e+01 7.812230769230772012e+02 4.381923217773437500e+02 -1.256927490234375000e+00 0.000000000000000000e+00 0.000000000000000000e+00 2.236559326171875000e+03 2.027818918228149414e+00 4.000000000000000000e+00 2.167595672607421875e+02 -8.225000000000000000e+01 4.975000000000000000e+01
3.800000000000000000e+01 8.048923076923080089e+02 4.367010192871093750e+02 -1.283569335937500000e+00 0.000000000000000000e+00 0.000000000000000000e+00 2.233285156250000000e+03 2.011918067932128906e+00 3.000000000000000000e+00 2.290163726806640625e+02 -8.175000000000000000e+01 4.975000000000000000e+01
5.600000000000000000e+01 7.781461538461536520e+02 4.373389282226562500e+02 -1.310211181640625000e+00 9.999999776482582092e-03 0.000000000000000000e+00 2.230010742187500000e+03 2.002232551574707031e+00 4.000000000000000000e+00 2.536879425048828125e+02 -8.125000000000000000e+01 4.975000000000000000e+01
6.700000000000000000e+01 7.955615384615387029e+02 4.394438781738281250e+02 -1.336853027343750000e+00 9.999999776482582092e-03 0.000000000000000000e+00 2.226736328125000000e+03 1.982048749923706055e+00 4.000000000000000000e+00 2.785103149414062500e+02 -8.075000000000000000e+01 4.975000000000000000e+01
4.800000000000000000e+01 8.109846153846156085e+02 4.451577148437500000e+02 -1.362884521484375000e+00 9.999999776482582092e-03 0.000000000000000000e+00 2.215592041015625000e+03 1.960560798645019531e+00 4.000000000000000000e+00 3.042842407226562500e+02 -8.025000000000000000e+01 4.975000000000000000e+01
6.200000000000000000e+01 7.834000000000002046e+02 4.496529541015625000e+02 -1.388732910156250000e+00 9.999999776482582092e-03 0.000000000000000000e+00 2.201823974609375000e+03 1.965013027191162109e+00 4.000000000000000000e+00 3.065294799804687500e+02 -7.975000000000000000e+01 4.975000000000000000e+01
5.000000000000000000e+01 8.156461538461541068e+02 4.473569335937500000e+02 -1.440399169921875000e+00 9.999999776482582092e-03 0.000000000000000000e+00 2.174288330078125000e+03 1.939147353172302246e+00 4.000000000000000000e+00 2.794148559570312500e+02 -7.875000000000000000e+01 4.975000000000000000e+01
6.000000000000000000e+01 8.192230769230772012e+02 4.439325561523437500e+02 -1.507812500000000000e+00 9.999999776482582092e-03 0.000000000000000000e+00 2.146956787109375000e+03 1.939950585365295410e+00 4.000000000000000000e+00 2.680431823730468750e+02 -7.825000000000000000e+01 4.975000000000000000e+01
5.200000000000000000e+01 8.235615384615383618e+02 4.411619873046875000e+02 -1.575256347656250000e+00 9.999999776482582092e-03 0.000000000000000000e+00 2.119625000000000000e+03 1.946288347244262695e+00 4.000000000000000000e+00 2.683289489746093750e+02 -7.775000000000000000e+01 4.975000000000000000e+01
4.400000000000000000e+01 8.403076923076927187e+02 4.577183532714843750e+02 -1.807769775390625000e+00 9.999999776482582092e-03 0.000000000000000000e+00 2.035338500976562500e+03 1.958413243293762207e+00 3.000000000000000000e+00 3.020298156738281250e+02 -7.625000000000000000e+01 4.975000000000000000e+01
6.000000000000000000e+01 8.437307692307695106e+02 4.807890014648437500e+02 -1.899383544921875000e+00 9.999999776482582092e-03 0.000000000000000000e+00 2.006173461914062500e+03 1.962711095809936523e+00 4.000000000000000000e+00 3.306724243164062500e+02 -7.575000000000000000e+01 4.975000000000000000e+01
5.600000000000000000e+01 8.969461538461536065e+02 5.026189880371093750e+02 -2.072387695312500000e+00 9.999999776482582092e-03 0.000000000000000000e+00 1.951080200195312500e+03 1.934033989906311035e+00 4.000000000000000000e+00 3.816011657714843750e+02 -7.475000000000000000e+01 4.975000000000000000e+01
4.200000000000000000e+01 8.494923076923071221e+02 4.739324035644531250e+02 -2.214691162109375000e+00 9.999999776482582092e-03 0.000000000000000000e+00 1.905697509765625000e+03 1.947341084480285645e+00 3.000000000000000000e+00 4.533539428710937500e+02 -7.375000000000000000e+01 4.975000000000000000e+01
6.300000000000000000e+01 1.002930769230768647e+03 4.679006347656250000e+02 -2.282592773437500000e+00 9.999999776482582092e-03 0.000000000000000000e+00 1.839103515625000000e+03 1.892206907272338867e+00 4.000000000000000000e+00 3.762293090820312500e+02 -7.125000000000000000e+01 4.975000000000000000e+01
5.300000000000000000e+01 1.021176923076923003e+03 4.911379089355468750e+02 -2.116973876953125000e+00 9.999999776482582092e-03 0.000000000000000000e+00 1.849793701171875000e+03 1.915084004402160645e+00 4.000000000000000000e+00 4.721861877441406250e+02 -6.975000000000000000e+01 4.975000000000000000e+01
4.700000000000000000e+01 1.063730769230769283e+03 4.922623596191406250e+02 -2.039581298828125000e+00 9.999999776482582092e-03 0.000000000000000000e+00 1.857255615234375000e+03 1.918782591819763184e+00 4.000000000000000000e+00 4.650480957031250000e+02 -6.925000000000000000e+01 4.975000000000000000e+01
5.800000000000000000e+01 1.112469230769230762e+03 5.017611083984375000e+02 -1.895660400390625000e+00 9.999999776482582092e-03 0.000000000000000000e+00 1.876413208007812500e+03 1.481661796569824219e+00 4.000000000000000000e+00 3.908692932128906250e+02 -6.875000000000000000e+01 4.975000000000000000e+01
6.900000000000000000e+01 1.151569230769230671e+03 5.096612548828125000e+02 -1.751739501953125000e+00 0.000000000000000000e+00 0.000000000000000000e+00 1.895570800781250000e+03 1.205775856971740723e+00 4.000000000000000000e+00 2.400180816650390625e+02 -6.825000000000000000e+01 4.975000000000000000e+01
5.200000000000000000e+01 1.183307692307692150e+03 5.241023559570312500e+02 -1.607788085937500000e+00 9.999999776482582092e-03 0.000000000000000000e+00 1.914728393554687500e+03 8.845574855804443359e-01 4.000000000000000000e+00 3.959343872070312500e+02 -6.775000000000000000e+01 4.975000000000000000e+01
3.600000000000000000e+01 1.102038461538461206e+03 5.454369506835937500e+02 2.111419677734375000e+00 0.000000000000000000e+00 0.000000000000000000e+00 1.801293579101562500e+03 1.417906641960144043e+00 3.000000000000000000e+00 4.213221435546875000e+02 -5.725000000000000000e+01 4.975000000000000000e+01
6.100000000000000000e+01 1.013200000000000045e+03 4.674744873046875000e+02 2.129089355468750000e+00 0.000000000000000000e+00 0.000000000000000000e+00 1.778884765625000000e+03 1.911160230636596680e+00 4.000000000000000000e+00 2.192006835937500000e+02 -5.625000000000000000e+01 4.975000000000000000e+01
3.400000000000000000e+01 5.690769230769235492e+02 2.880419921875000000e+02 3.683471679687500000e-02 0.000000000000000000e+00 0.000000000000000000e+00 2.583526367187500000e+03 1.767179250717163086e+00 3.000000000000000000e+00 2.873534240722656250e+02 -9.575000000000000000e+01 5.025000000000000000e+01
3.600000000000000000e+01 7.404000000000006594e+02 3.587026062011718750e+02 -7.033386230468750000e-01 0.000000000000000000e+00 0.000000000000000000e+00 2.430485351562500000e+03 2.173440694808959961e+00 3.000000000000000000e+00 3.518890686035156250e+02 -9.375000000000000000e+01 5.025000000000000000e+01
5.400000000000000000e+01 7.738538461538462343e+02 3.591781921386718750e+02 -7.624816894531250000e-01 0.000000000000000000e+00 0.000000000000000000e+00 2.405008300781250000e+03 1.475156188011169434e+00 4.000000000000000000e+00 3.879830017089843750e+02 -9.325000000000000000e+01 5.025000000000000000e+01
4.100000000000000000e+01 8.297769230769231399e+02 3.935461120605468750e+02 -8.770446777343750000e-01 0.000000000000000000e+00 0.000000000000000000e+00 2.320195068359375000e+03 1.804097294807434082e+00 3.000000000000000000e+00 4.014730224609375000e+02 -9.125000000000000000e+01 5.025000000000000000e+01
6.800000000000000000e+01 8.326769230769234582e+02 3.773595275878906250e+02 -8.385314941406250000e-01 0.000000000000000000e+00 0.000000000000000000e+00 2.308394287109375000e+03 1.964043498039245605e+00 4.000000000000000000e+00 4.446458435058593750e+02 -9.075000000000000000e+01 5.025000000000000000e+01
5.800000000000000000e+01 7.443615384615386574e+02 3.862264709472656250e+02 -9.557189941406250000e-01 9.999999776482582092e-03 0.000000000000000000e+00 2.181265380859375000e+03 1.135110855102539062e+00 4.000000000000000000e+00 3.257294311523437500e+02 -8.725000000000000000e+01 5.025000000000000000e+01
5.200000000000000000e+01 7.380692307692311260e+02 3.948738403320312500e+02 -1.038055419921875000e+00 9.999999776482582092e-03 0.000000000000000000e+00 2.191703613281250000e+03 1.962842345237731934e+00 4.000000000000000000e+00 3.208587646484375000e+02 -8.675000000000000000e+01 5.025000000000000000e+01
4.500000000000000000e+01 7.242769230769233673e+02 3.976549987792968750e+02 -1.120422363281250000e+00 9.999999776482582092e-03 0.000000000000000000e+00 2.202142089843750000e+03 1.620854377746582031e+00 4.000000000000000000e+00 2.951089477539062500e+02 -8.625000000000000000e+01 5.025000000000000000e+01
6.800000000000000000e+01 7.219846153846149264e+02 3.990342102050781250e+02 -1.235992431640625000e+00 0.000000000000000000e+00 0.000000000000000000e+00 2.197200195312500000e+03 8.131636381149291992e-01 4.000000000000000000e+00 2.240104522705078125e+02 -8.575000000000000000e+01 5.025000000000000000e+01
6.700000000000000000e+01 7.077153846153844370e+02 4.012797546386718750e+02 -1.351593017578125000e+00 0.000000000000000000e+00 0.000000000000000000e+00 2.192258544921875000e+03 1.466704726219177246e+00 4.000000000000000000e+00 1.768047943115234375e+02 -8.525000000000000000e+01 5.025000000000000000e+01
6.700000000000000000e+01 6.974384615384616382e+02 4.036521606445312500e+02 -1.467193603515625000e+00 0.000000000000000000e+00 0.000000000000000000e+00 2.187316894531250000e+03 1.718964338302612305e+00 4.000000000000000000e+00 1.425098724365234375e+02 -8.475000000000000000e+01 5.025000000000000000e+01
1.500000000000000000e+01 7.010692307692310123e+02 4.087977600097656250e+02 -1.556182861328125000e+00 0.000000000000000000e+00 0.000000000000000000e+00 2.184046630859375000e+03 1.670536398887634277e+00 2.000000000000000000e+00 1.053403091430664062e+02 -8.425000000000000000e+01 5.025000000000000000e+01
6.900000000000000000e+01 7.279230769230773603e+02 4.142916564941406250e+02 -1.565246582031250000e+00 0.000000000000000000e+00 0.000000000000000000e+00 2.185790771484375000e+03 1.836229920387268066e+00 4.000000000000000000e+00 1.735150604248046875e+02 -8.375000000000000000e+01 5.025000000000000000e+01
5.800000000000000000e+01 7.406384615384615699e+02 4.205897521972656250e+02 -1.574340820312500000e+00 0.000000000000000000e+00 0.000000000000000000e+00 2.187535156250000000e+03 2.013351678848266602e+00 4.000000000000000000e+00 1.664856567382812500e+02 -8.325000000000000000e+01 5.025000000000000000e+01
6.000000000000000000e+00 7.434999999999998863e+02 4.238979187011718750e+02 -1.581359863281250000e+00 0.000000000000000000e+00 0.000000000000000000e+00 2.189467041015625000e+03 2.036356687545776367e+00 1.000000000000000000e+00 1.001376342773437500e+02 -8.225000000000000000e+01 5.025000000000000000e+01
4.000000000000000000e+01 7.427307692307692832e+02 4.187189636230468750e+02 -1.568054199218750000e+00 0.000000000000000000e+00 0.000000000000000000e+00 2.188098388671875000e+03 2.018383979797363281e+00 3.000000000000000000e+00 1.031742706298828125e+02 -8.175000000000000000e+01 5.025000000000000000e+01
3.300000000000000000e+01 7.439461538461538339e+02 4.067474975585937500e+02 -1.554779052734375000e+00 9.999999776482582092e-03 0.000000000000000000e+00 2.186729736328125000e+03 1.994121909141540527e+00 3.000000000000000000e+00 1.849921569824218750e+02 -8.125000000000000000e+01 5.025000000000000000e+01
5.700000000000000000e+01 7.369846153846153811e+02 3.945684204101562500e+02 -1.541503906250000000e+00 9.999999776482582092e-03 0.000000000000000000e+00 2.185360839843750000e+03 1.974457144737243652e+00 4.000000000000000000e+00 2.395321960449218750e+02 -8.075000000000000000e+01 5.025000000000000000e+01
4.800000000000000000e+01 7.524307692307691013e+02 3.956373596191406250e+02 -1.609069824218750000e+00 9.999999776482582092e-03 0.000000000000000000e+00 2.157020996093750000e+03 1.938115000724792480e+00 4.000000000000000000e+00 2.690936279296875000e+02 -7.975000000000000000e+01 5.025000000000000000e+01
4.200000000000000000e+01 7.836615384615383846e+02 4.328243103027343750e+02 -1.811859130859375000e+00 9.999999776482582092e-03 0.000000000000000000e+00 2.092278076171875000e+03 1.003309369087219238e+00 3.000000000000000000e+00 2.619602050781250000e+02 -7.825000000000000000e+01 5.025000000000000000e+01
2.800000000000000000e+01 7.961461538461537657e+02 4.358418273925781250e+02 -1.933685302734375000e+00 9.999999776482582092e-03 0.000000000000000000e+00 2.059532470703125000e+03 1.536647200584411621e+00 3.000000000000000000e+00 2.560854492187500000e+02 -7.775000000000000000e+01 5.025000000000000000e+01
4.100000000000000000e+01 8.124769230769229580e+02 4.377636108398437500e+02 -2.055480957031250000e+00 9.999999776482582092e-03 0.000000000000000000e+00 2.026786865234375000e+03 1.909842729568481445e+00 3.000000000000000000e+00 2.616852416992187500e+02 -7.725000000000000000e+01 5.025000000000000000e+01
2.400000000000000000e+01 8.836923076923077360e+02 5.016830749511718750e+02 -2.764801025390625000e+00 9.999999776482582092e-03 0.000000000000000000e+00 1.844229003906250000e+03 1.103775382041931152e+00 3.000000000000000000e+00 4.023025512695312500e+02 -7.425000000000000000e+01 5.025000000000000000e+01
5.400000000000000000e+01 9.149384615384623203e+02 4.709154052734375000e+02 -2.923614501953125000e+00 9.999999776482582092e-03 0.000000000000000000e+00 1.794499877929687500e+03 1.861022830009460449e+00 4.000000000000000000e+00 4.498727722167968750e+02 -7.325000000000000000e+01 5.025000000000000000e+01
5.400000000000000000e+01 1.034361538461538430e+03 4.596755371093750000e+02 -2.646148681640625000e+00 9.999999776482582092e-03 0.000000000000000000e+00 1.752098266601562500e+03 1.842605710029602051e+00 4.000000000000000000e+00 5.490084228515625000e+02 -6.975000000000000000e+01 5.025000000000000000e+01
6.400000000000000000e+01 1.107461538461538112e+03 4.941447448730468750e+02 -2.443847656250000000e+00 1.102127730846405029e-01 0.000000000000000000e+00 1.771460571289062500e+03 1.871564984321594238e+00 4.000000000000000000e+00 5.236289062500000000e+02 -6.875000000000000000e+01 5.025000000000000000e+01
5.700000000000000000e+01 1.199653846153845507e+03 5.271332397460937500e+02 -2.197967529296875000e+00 9.999999776482582092e-03 0.000000000000000000e+00 1.800830200195312500e+03 1.828104972839355469e+00 4.000000000000000000e+00 5.812657470703125000e+02 -6.775000000000000000e+01 5.025000000000000000e+01
7.000000000000000000e+01 1.222584615384615972e+03 5.355349731445312500e+02 -2.011657714843750000e+00 9.999999776482582092e-03 0.000000000000000000e+00 1.819136962890625000e+03 9.242001771926879883e-01 4.000000000000000000e+00 4.546514892578125000e+02 -6.725000000000000000e+01 5.025000000000000000e+01
5.800000000000000000e+01 1.081500000000000227e+03 5.119077453613281250e+02 1.555145263671875000e+00 0.000000000000000000e+00 0.000000000000000000e+00 1.632227050781250000e+03 1.274054050445556641e+00 4.000000000000000000e+00 2.671199645996093750e+02 -5.725000000000000000e+01 5.025000000000000000e+01
5.500000000000000000e+01 1.094469230769230990e+03 5.139711914062500000e+02 1.576416015625000000e+00 0.000000000000000000e+00 0.000000000000000000e+00 1.613300170898437500e+03 1.524408698081970215e+00 4.000000000000000000e+00 3.764827270507812500e+02 -5.675000000000000000e+01 5.025000000000000000e+01
5.300000000000000000e+01 5.950923076923077133e+02 2.830734252929687500e+02 -3.453063964843750000e-01 0.000000000000000000e+00 0.000000000000000000e+00 2.513784667968750000e+03 9.010481834411621094e-01 4.000000000000000000e+00 2.980043334960937500e+02 -9.575000000000000000e+01 5.075000000000000000e+01
4.800000000000000000e+01 6.860692307692307850e+02 2.876994323730468750e+02 -8.962402343750000000e-01 0.000000000000000000e+00 0.000000000000000000e+00 2.401716064453125000e+03 1.226295709609985352e+00 4.000000000000000000e+00 3.873338012695312500e+02 -9.425000000000000000e+01 5.075000000000000000e+01
5.400000000000000000e+01 7.320538461538465071e+02 2.810459594726562500e+02 -1.081756591796875000e+00 0.000000000000000000e+00 0.000000000000000000e+00 2.363896728515625000e+03 1.336266398429870605e+00 4.000000000000000000e+00 3.902479248046875000e+02 -9.375000000000000000e+01 5.075000000000000000e+01
6.400000000000000000e+01 7.743923076923080089e+02 2.901501770019531250e+02 -1.154754638671875000e+00 0.000000000000000000e+00 0.000000000000000000e+00 2.337639160156250000e+03 1.261746644973754883e+00 4.000000000000000000e+00 3.757003173828125000e+02 -9.325000000000000000e+01 5.075000000000000000e+01
6.300000000000000000e+01 7.913615384615385437e+02 3.216437377929687500e+02 -1.227752685546875000e+00 0.000000000000000000e+00 0.000000000000000000e+00 2.311381835937500000e+03 1.342352271080017090e+00 4.000000000000000000e+00 4.201398315429687500e+02 -9.275000000000000000e+01 5.075000000000000000e+01
5.800000000000000000e+01 8.071999999999997044e+02 3.560328063964843750e+02 -1.300720214843750000e+00 0.000000000000000000e+00 0.000000000000000000e+00 2.285124511718750000e+03 8.588914871215820312e-01 4.000000000000000000e+00 4.399709472656250000e+02 -9.225000000000000000e+01 5.075000000000000000e+01
5.300000000000000000e+01 7.520000000000000000e+02 3.232758178710937500e+02 -1.465911865234375000e+00 9.999999776482582092e-03 0.000000000000000000e+00 2.162890136718750000e+03 7.913038730621337891e-01 4.000000000000000000e+00 3.374079895019531250e+02 -8.825000000000000000e+01 5.075000000000000000e+01
5.000000000000000000e+01 7.288692307692302847e+02 3.642797851562500000e+02 -1.637786865234375000e+00 9.999999776482582092e-03 0.000000000000000000e+00 2.140631835937500000e+03 7.929403185844421387e-01 4.000000000000000000e+00 2.930101318359375000e+02 -8.725000000000000000e+01 5.075000000000000000e+01
3.800000000000000000e+01 7.236769230769233445e+02 3.779062805175781250e+02 -1.731658935546875000e+00 9.999999776482582092e-03 0.000000000000000000e+00 2.129793945312500000e+03 7.971828579902648926e-01 3.000000000000000000e+00 2.756517639160156250e+02 -8.675000000000000000e+01 5.075000000000000000e+01
7.300000000000000000e+01 7.072769230769229125e+02 3.860007019042968750e+02 -1.825531005859375000e+00 9.999999776482582092e-03 0.000000000000000000e+00 2.118956298828125000e+03 7.991359233856201172e-01 4.000000000000000000e+00 2.437301483154296875e+02 -8.625000000000000000e+01 5.075000000000000000e+01
5.800000000000000000e+01 6.843615384615385437e+02 3.964750671386718750e+02 -1.959442138671875000e+00 0.000000000000000000e+00 0.000000000000000000e+00 2.116665283203125000e+03 1.855738878250122070e+00 4.000000000000000000e+00 1.551781311035156250e+02 -8.525000000000000000e+01 5.075000000000000000e+01
6.100000000000000000e+01 6.831307692307692605e+02 4.020956420898437500e+02 -2.026367187500000000e+00 0.000000000000000000e+00 0.000000000000000000e+00 2.115519775390625000e+03 1.553058862686157227e+00 4.000000000000000000e+00 1.339120788574218750e+02 -8.475000000000000000e+01 5.075000000000000000e+01
2.300000000000000000e+01 6.748384615384615017e+02 4.083944702148437500e+02 -2.062835693359375000e+00 0.000000000000000000e+00 0.000000000000000000e+00 2.116220947265625000e+03 1.998725771903991699e+00 3.000000000000000000e+00 1.064923095703125000e+02 -8.425000000000000000e+01 5.075000000000000000e+01
6.000000000000000000e+01 6.858384615384612744e+02 4.111935119628906250e+02 -2.007812500000000000e+00 0.000000000000000000e+00 0.000000000000000000e+00 2.122462890625000000e+03 1.980317711830139160e+00 4.000000000000000000e+00 1.116545715332031250e+02 -8.375000000000000000e+01 5.075000000000000000e+01
1.100000000000000000e+01 6.940692307692307850e+02 4.101796875000000000e+02 -1.952789306640625000e+00 9.999999776482582092e-03 0.000000000000000000e+00 2.128704833984375000e+03 1.979990601539611816e+00 2.000000000000000000e+00 1.626307373046875000e+02 -8.325000000000000000e+01 5.075000000000000000e+01
4.700000000000000000e+01 6.967846153846154493e+02 3.922189025878906250e+02 -1.889465332031250000e+00 9.999999776482582092e-03 0.000000000000000000e+00 2.121251464843750000e+03 1.990760087966918945e+00 4.000000000000000000e+00 9.315466308593750000e+01 -8.225000000000000000e+01 5.075000000000000000e+01
1.400000000000000000e+01 7.058615384615386574e+02 3.784579772949218750e+02 -1.927886962890625000e+00 9.999999776482582092e-03 0.000000000000000000e+00 2.087618652343750000e+03 1.967535734176635742e+00 2.000000000000000000e+00 6.344881820678710938e+01 -8.175000000000000000e+01 5.075000000000000000e+01
5.600000000000000000e+01 7.007461538461537884e+02 3.464907531738281250e+02 -1.988128662109375000e+00 9.999999776482582092e-03 0.000000000000000000e+00 2.025454711914062500e+03 1.918255090713500977e+00 4.000000000000000000e+00 1.213530960083007812e+02 -8.025000000000000000e+01 5.075000000000000000e+01
4.900000000000000000e+01 7.123461538461540385e+02 3.724966735839843750e+02 -1.918395996093750000e+00 9.999999776482582092e-03 0.000000000000000000e+00 2.061480712890625000e+03 1.659151673316955566e+00 4.000000000000000000e+00 7.659990692138671875e+01 -7.925000000000000000e+01 5.075000000000000000e+01
4.900000000000000000e+01 7.194923076923075769e+02 3.964537353515625000e+02 -1.883514404296875000e+00 9.999999776482582092e-03 0.000000000000000000e+00 2.079493652343750000e+03 7.818427085876464844e-01 4.000000000000000000e+00 1.512087402343750000e+02 -7.875000000000000000e+01 5.075000000000000000e+01
4.600000000000000000e+01 7.366615384615386120e+02 4.161082458496093750e+02 -2.049438476562500000e+00 9.999999776482582092e-03 0.000000000000000000e+00 2.042656982421875000e+03 7.798042297363281250e-01 4.000000000000000000e+00 2.064480590820312500e+02 -7.825000000000000000e+01 5.075000000000000000e+01
4.900000000000000000e+01 7.589846153846153811e+02 4.298748474121093750e+02 -2.215362548828125000e+00 9.999999776482582092e-03 0.000000000000000000e+00 2.005820312500000000e+03 7.725032567977905273e-01 4.000000000000000000e+00 2.432402648925781250e+02 -7.775000000000000000e+01 5.075000000000000000e+01
6.100000000000000000e+01 8.019230769230770193e+02 4.443924255371093750e+02 -2.548004150390625000e+00 9.999999776482582092e-03 0.000000000000000000e+00 1.932687255859375000e+03 1.876116156578063965e+00 4.000000000000000000e+00 2.697831726074218750e+02 -7.675000000000000000e+01 5.075000000000000000e+01
4.600000000000000000e+01 8.945769230769230944e+02 4.734252319335937500e+02 -3.445220947265625000e+00 1.513962000608444214e-01 0.000000000000000000e+00 1.720282714843750000e+03 1.270537257194519043e+00 4.000000000000000000e+00 4.876656494140625000e+02 -7.325000000000000000e+01 5.075000000000000000e+01
3.800000000000000000e+01 9.037307692307695106e+02 4.476931152343750000e+02 -3.437866210937500000e+00 1.554817110300064087e-01 0.000000000000000000e+00 1.704929321289062500e+03 7.915663719177246094e-01 3.000000000000000000e+00 5.281895751953125000e+02 -7.275000000000000000e+01 5.075000000000000000e+01
5.100000000000000000e+01 1.090830769230769192e+03 4.280179443359375000e+02 -3.128997802734375000e+00 2.656746506690979004e-01 0.000000000000000000e+00 1.666379028320312500e+03 1.746395945549011230e+00 4.000000000000000000e+00 7.426630249023437500e+02 -6.975000000000000000e+01 5.075000000000000000e+01
4.800000000000000000e+01 1.066784615384615336e+03 4.413555297851562500e+02 -3.058959960937500000e+00 9.999999776482582092e-03 0.000000000000000000e+00 1.667998168945312500e+03 1.783286452293395996e+00 4.000000000000000000e+00 3.935045471191406250e+02 -6.925000000000000000e+01 5.075000000000000000e+01
6.100000000000000000e+01 1.134484615384615836e+03 5.024552612304687500e+02 -2.883422851562500000e+00 2.559279799461364746e-01 0.000000000000000000e+00 1.687249145507812500e+03 1.806795001029968262e+00 4.000000000000000000e+00 6.021996459960937500e+02 -6.825000000000000000e+01 5.075000000000000000e+01
7.200000000000000000e+01 1.157392307692307668e+03 5.298809204101562500e+02 -2.795654296875000000e+00 9.999999776482582092e-03 0.000000000000000000e+00 1.696874633789062500e+03 1.783457636833190918e+00 4.000000000000000000e+00 4.108850708007812500e+02 -6.775000000000000000e+01 5.075000000000000000e+01
6.000000000000000000e+01 1.167846153846153811e+03 5.395912475585937500e+02 -2.659210205078125000e+00 1.064877659082412720e-01 0.000000000000000000e+00 1.709933715820312500e+03 7.146017551422119141e-01 4.000000000000000000e+00 4.974002685546875000e+02 -6.725000000000000000e+01 5.075000000000000000e+01
7.100000000000000000e+01 1.069492307692307577e+03 5.580230102539062500e+02 -1.895080566406250000e+00 9.999999776482582092e-03 0.000000000000000000e+00 1.772738403320312500e+03 1.174257516860961914e+00 4.000000000000000000e+00 2.961255798339843750e+02 -6.525000000000000000e+01 5.075000000000000000e+01
5.900000000000000000e+01 1.049630769230768465e+03 5.629119873046875000e+02 -1.678405761718750000e+00 9.999999776482582092e-03 0.000000000000000000e+00 1.785009887695312500e+03 1.254797458648681641e+00 4.000000000000000000e+00 5.104496459960937500e+02 -6.475000000000000000e+01 5.075000000000000000e+01
6.400000000000000000e+01 1.032099999999999454e+03 5.556826782226562500e+02 -1.245056152343750000e+00 9.999999776482582092e-03 0.000000000000000000e+00 1.809552978515625000e+03 1.174969792366027832e+00 4.000000000000000000e+00 3.820905151367187500e+02 -6.375000000000000000e+01 5.075000000000000000e+01
4.700000000000000000e+01 1.007969230769230990e+03 5.289846801757812500e+02 -4.030456542968750000e-01 0.000000000000000000e+00 0.000000000000000000e+00 1.819437377929687500e+03 1.733436822891235352e+00 4.000000000000000000e+00 2.058789367675781250e+02 -6.175000000000000000e+01 5.075000000000000000e+01
6.300000000000000000e+01 1.067753846153846553e+03 4.696515197753906250e+02 5.742797851562500000e-01 0.000000000000000000e+00 0.000000000000000000e+00 1.692062866210937500e+03 1.080564618110656738e+00 4.000000000000000000e+00 1.912445068359375000e+02 -6.025000000000000000e+01 5.075000000000000000e+01
1.200000000000000000e+01 1.154015384615384619e+03 5.485334472656250000e+02 1.072296142578125000e+00 0.000000000000000000e+00 0.000000000000000000e+00 1.536772705078125000e+03 8.030360937118530273e-01 2.000000000000000000e+00 4.502707824707031250e+02 -5.675000000000000000e+01 5.075000000000000000e+01
1.800000000000000000e+01 1.086192307692306940e+03 5.643272094726562500e+02 1.139495849609375000e+00 0.000000000000000000e+00 0.000000000000000000e+00 1.517276489257812500e+03 1.605527758598327637e+00 2.000000000000000000e+00 2.522004699707031250e+02 -5.625000000000000000e+01 5.075000000000000000e+01
4.300000000000000000e+01 6.351461538461537657e+02 2.475987091064453125e+02 -6.930847167968750000e-01 0.000000000000000000e+00 0.000000000000000000e+00 2.456310302734375000e+03 8.714583516120910645e-01 3.000000000000000000e+00 2.854094543457031250e+02 -9.575000000000000000e+01 5.125000000000000000e+01
4.900000000000000000e+01 6.706076923076923322e+02 2.477467651367187500e+02 -1.055206298828125000e+00 0.000000000000000000e+00 0.000000000000000000e+00 2.384015869140625000e+03 8.737932443618774414e-01 4.000000000000000000e+00 3.514350891113281250e+02 -9.475000000000000000e+01 5.125000000000000000e+01
7.000000000000000000e+01 7.790769230769229807e+02 2.651664123535156250e+02 -1.584594726562500000e+00 9.999999776482582092e-03 0.000000000000000000e+00 2.257689941406250000e+03 2.022817611694335938e+00 4.000000000000000000e+00 4.094635009765625000e+02 -9.275000000000000000e+01 5.125000000000000000e+01
6.500000000000000000e+01 8.333307692307694197e+02 2.849378967285156250e+02 -1.846557617187500000e+00 9.999999776482582092e-03 0.000000000000000000e+00 2.154251953125000000e+03 2.027669191360473633e+00 4.000000000000000000e+00 3.896529235839843750e+02 -9.025000000000000000e+01 5.125000000000000000e+01
5.800000000000000000e+01 7.245692307692308987e+02 3.036461791992187500e+02 -2.155578613281250000e+00 9.999999776482582092e-03 0.000000000000000000e+00 2.080400390625000000e+03 7.923359870910644531e-01 4.000000000000000000e+00 2.777590332031250000e+02 -8.775000000000000000e+01 5.125000000000000000e+01
5.600000000000000000e+01 7.073000000000004093e+02 3.295965576171875000e+02 -2.324523925781250000e+00 9.999999776482582092e-03 0.000000000000000000e+00 2.058789550781250000e+03 7.980268001556396484e-01 4.000000000000000000e+00 2.375170288085937500e+02 -8.675000000000000000e+01 5.125000000000000000e+01
3.600000000000000000e+01 6.763076923076924913e+02 3.523936767578125000e+02 -2.430664062500000000e+00 9.999999776482582092e-03 0.000000000000000000e+00 2.048576416015625000e+03 1.977526903152465820e+00 3.000000000000000000e+00 1.719999694824218750e+02 -8.575000000000000000e+01 5.125000000000000000e+01
5.900000000000000000e+01 6.729384615384616382e+02 3.698158569335937500e+02 -2.452301025390625000e+00 9.999999776482582092e-03 0.000000000000000000e+00 2.049168701171875000e+03 1.971969723701477051e+00 4.000000000000000000e+00 1.679907226562500000e+02 -8.525000000000000000e+01 5.125000000000000000e+01
6.000000000000000000e+00 6.695923076923074859e+02 3.849426269531250000e+02 -2.473968505859375000e+00 9.999999776482582092e-03 0.000000000000000000e+00 2.049760742187500000e+03 1.960880637168884277e+00 1.000000000000000000e+00 1.385775451660156250e+02 -8.475000000000000000e+01 5.125000000000000000e+01
7.000000000000000000e+00 6.581692307692306940e+02 3.965635375976562500e+02 -2.464294433593750000e+00 9.999999776482582092e-03 0.000000000000000000e+00 2.052369628906250000e+03 1.953123450279235840e+00 1.000000000000000000e+00 9.158667755126953125e+01 -8.425000000000000000e+01 5.125000000000000000e+01
1.900000000000000000e+01 6.566846153846151992e+02 3.758872375488281250e+02 -2.153503417968750000e+00 9.999999776482582092e-03 0.000000000000000000e+00 2.078345214843750000e+03 1.941144108772277832e+00 2.000000000000000000e+00 1.016746139526367188e+02 -8.275000000000000000e+01 5.125000000000000000e+01
1.500000000000000000e+01 6.533692307692307395e+02 3.626157836914062500e+02 -2.184265136718750000e+00 9.999999776482582092e-03 0.000000000000000000e+00 2.035725097656250000e+03 1.936546683311462402e+00 2.000000000000000000e+00 1.131838378906250000e+02 -8.225000000000000000e+01 5.125000000000000000e+01
3.200000000000000000e+01 6.584615384615384528e+02 3.438571472167968750e+02 -2.514556884765625000e+00 9.999999776482582092e-03 0.000000000000000000e+00 1.847926757812500000e+03 1.900652170181274414e+00 3.000000000000000000e+00 4.066680526733398438e+01 -8.125000000000000000e+01 5.125000000000000000e+01
1.200000000000000000e+01 6.830000000000000000e+02 3.519011535644531250e+02 -2.214935302734375000e+00 9.999999776482582092e-03 0.000000000000000000e+00 1.955298706054687500e+03 1.185332059860229492e+00 2.000000000000000000e+00 1.731661796569824219e+01 -7.925000000000000000e+01 5.125000000000000000e+01
3.500000000000000000e+01 6.931076923076921048e+02 3.683640747070312500e+02 -2.030914306640625000e+00 9.999999776482582092e-03 0.000000000000000000e+00 2.037024536132812500e+03 7.705648541450500488e-01 3.000000000000000000e+00 3.332099914550781250e+01 -7.875000000000000000e+01 5.125000000000000000e+01
5.500000000000000000e+01 8.121615384615383846e+02 4.785391845703125000e+02 -3.239166259765625000e+00 1.358046531677246094e-01 0.000000000000000000e+00 1.804980102539062500e+03 1.057611823081970215e+00 4.000000000000000000e+00 3.696444091796875000e+02 -7.575000000000000000e+01 5.125000000000000000e+01
2.600000000000000000e+01 1.021161538461538157e+03 4.249665832519531250e+02 -3.573852539062500000e+00 1.572481244802474976e-01 0.000000000000000000e+00 1.590474365234375000e+03 1.494502544403076172e+00 3.000000000000000000e+00 4.880938720703125000e+02 -6.975000000000000000e+01 5.125000000000000000e+01
5.700000000000000000e+01 1.027653846153846189e+03 4.287598571777343750e+02 -3.522369384765625000e+00 1.480740904808044434e-01 0.000000000000000000e+00 1.588810791015625000e+03 1.762648105621337891e+00 4.000000000000000000e+00 4.583989257812500000e+02 -6.925000000000000000e+01 5.125000000000000000e+01
5.100000000000000000e+01 1.156546153846153857e+03 5.275209350585937500e+02 -3.325408935546875000e+00 2.735347449779510498e-01 0.000000000000000000e+00 1.608587646484375000e+03 1.668396115303039551e+00 4.000000000000000000e+00 6.462064819335937500e+02 -6.725000000000000000e+01 5.125000000000000000e+01
4.200000000000000000e+01 1.006192307692307395e+03 5.411159667968750000e+02 -3.111114501953125000e+00 1.699143052101135254e-01 0.000000000000000000e+00 1.630498657226562500e+03 1.664456129074096680e+00 3.000000000000000000e+00 4.299242553710937500e+02 -6.625000000000000000e+01 5.125000000000000000e+01
4.300000000000000000e+01 9.528076923076921503e+02 5.455806274414062500e+02 -3.003967285156250000e+00 2.621402144432067871e-01 0.000000000000000000e+00 1.641454101562500000e+03 1.655626177787780762e+00 3.000000000000000000e+00 6.357659912109375000e+02 -6.575000000000000000e+01 5.125000000000000000e+01
7.100000000000000000e+01 1.017807692307692150e+03 5.421979370117187500e+02 -2.686614990234375000e+00 2.224744558334350586e-01 0.000000000000000000e+00 1.663922973632812500e+03 1.582230806350708008e+00 4.000000000000000000e+00 4.386161193847656250e+02 -6.475000000000000000e+01 5.125000000000000000e+01
1.600000000000000000e+01 1.057361538461538430e+03 5.327091064453125000e+02 -2.520599365234375000e+00 4.069528579711914062e-01 0.000000000000000000e+00 1.675197143554687500e+03 1.554437756538391113e+00 2.000000000000000000e+00 8.348688354492187500e+02 -6.425000000000000000e+01 5.125000000000000000e+01
7.400000000000000000e+01 1.066176923076922776e+03 4.996466064453125000e+02 -1.725036621093750000e+00 1.824311912059783936e-01 0.000000000000000000e+00 1.712161499023437500e+03 1.236149430274963379e+00 4.000000000000000000e+00 4.649745178222656250e+02 -6.225000000000000000e+01 5.125000000000000000e+01
7.200000000000000000e+01 1.022392307692308009e+03 5.061279907226562500e+02 -1.482330322265625000e+00 9.999999776482582092e-03 0.000000000000000000e+00 1.712529174804687500e+03 1.119848489761352539e+00 4.000000000000000000e+00 2.762698364257812500e+02 -6.175000000000000000e+01 5.125000000000000000e+01
6.300000000000000000e+01 1.087761538461538521e+03 4.929193725585937500e+02 -7.998352050781250000e-01 9.999999776482582092e-03 0.000000000000000000e+00 1.664089721679687500e+03 1.581003665924072266e+00 4.000000000000000000e+00 3.548988647460937500e+02 -6.075000000000000000e+01 5.125000000000000000e+01
5.000000000000000000e+01 1.078446153846153720e+03 4.545556335449218750e+02 -2.210388183593750000e-01 9.999999776482582092e-03 0.000000000000000000e+00 1.621588012695312500e+03 1.705383539199829102e+00 4.000000000000000000e+00 2.605172424316406250e+02 -5.975000000000000000e+01 5.125000000000000000e+01
5.400000000000000000e+01 1.082446153846153948e+03 4.700615844726562500e+02 -8.712768554687500000e-02 0.000000000000000000e+00 0.000000000000000000e+00 1.609243774414062500e+03 1.738311767578125000e+00 4.000000000000000000e+00 2.227319488525390625e+02 -5.925000000000000000e+01 5.125000000000000000e+01
5.100000000000000000e+01 1.110053846153846280e+03 5.357701416015625000e+02 7.412414550781250000e-01 0.000000000000000000e+00 0.000000000000000000e+00 1.528207275390625000e+03 1.485018134117126465e+00 4.000000000000000000e+00 4.306690979003906250e+01 -5.625000000000000000e+01 5.125000000000000000e+01
3.300000000000000000e+01 5.681461538461535383e+02 1.583875274658203125e+02 -2.365417480468750000e-01 0.000000000000000000e+00 0.000000000000000000e+00 2.542077880859375000e+03 2.142712116241455078e+00 3.000000000000000000e+00 2.267123107910156250e+02 -9.775000000000000000e+01 5.175000000000000000e+01
5.700000000000000000e+01 6.481076923076924459e+02 1.584712524414062500e+02 -8.197937011718750000e-01 0.000000000000000000e+00 0.000000000000000000e+00 2.439498535156250000e+03 1.348933815956115723e+00 4.000000000000000000e+00 2.523748016357421875e+02 -9.625000000000000000e+01 5.175000000000000000e+01
3.700000000000000000e+01 6.571692307692311488e+02 1.724028930664062500e+02 -1.040832519531250000e+00 0.000000000000000000e+00 0.000000000000000000e+00 2.398835937500000000e+03 8.566977977752685547e-01 3.000000000000000000e+00 2.947053222656250000e+02 -9.575000000000000000e+01 5.175000000000000000e+01
4.400000000000000000e+01 6.640538461538459387e+02 1.981836242675781250e+02 -1.226226806640625000e+00 0.000000000000000000e+00 0.000000000000000000e+00 2.362881347656250000e+03 8.548655509948730469e-01 3.000000000000000000e+00 3.178142395019531250e+02 -9.525000000000000000e+01 5.175000000000000000e+01
6.700000000000000000e+01 6.883846153846152447e+02 2.307762451171875000e+02 -1.573150634765625000e+00 0.000000000000000000e+00 0.000000000000000000e+00 2.294111083984375000e+03 8.563698530197143555e-01 4.000000000000000000e+00 3.766885681152343750e+02 -9.425000000000000000e+01 5.175000000000000000e+01
6.500000000000000000e+01 7.652461538461536747e+02 2.430503540039062500e+02 -1.941467285156250000e+00 9.999999776482582092e-03 0.000000000000000000e+00 2.203997802734375000e+03 1.270099163055419922e+00 4.000000000000000000e+00 3.767803039550781250e+02 -9.275000000000000000e+01 5.175000000000000000e+01
6.000000000000000000e+01 7.849615384615384528e+02 2.593625793457031250e+02 -2.038879394531250000e+00 9.999999776482582092e-03 0.000000000000000000e+00 2.176133789062500000e+03 2.036841869354248047e+00 4.000000000000000000e+00 4.260244445800781250e+02 -9.225000000000000000e+01 5.175000000000000000e+01
3.800000000000000000e+01 7.865230769230768146e+02 2.736322021484375000e+02 -2.129058837890625000e+00 9.999999776482582092e-03 0.000000000000000000e+00 2.150371093750000000e+03 2.054738521575927734e+00 3.000000000000000000e+00 4.024723510742187500e+02 -9.175000000000000000e+01 5.175000000000000000e+01
5.300000000000000000e+01 8.263153846153842323e+02 2.775797119140625000e+02 -2.414367675781250000e+00 9.999999776482582092e-03 0.000000000000000000e+00 2.073620361328125000e+03 1.951764822006225586e+00 4.000000000000000000e+00 3.343794555664062500e+02 -8.975000000000000000e+01 5.175000000000000000e+01
5.300000000000000000e+01 7.394615384615385665e+02 2.807745361328125000e+02 -2.688140869140625000e+00 9.999999776482582092e-03 0.000000000000000000e+00 2.021734497070312500e+03 1.403125286102294922e+00 4.000000000000000000e+00 3.175368957519531250e+02 -8.825000000000000000e+01 5.175000000000000000e+01
5.200000000000000000e+01 7.088999999999997499e+02 2.846239318847656250e+02 -2.842315673828125000e+00 1.030334755778312683e-01 0.000000000000000000e+00 1.998558105468750000e+03 1.936451792716979980e+00 4.000000000000000000e+00 2.684226989746093750e+02 -8.725000000000000000e+01 5.175000000000000000e+01
2.300000000000000000e+01 6.680461538461541977e+02 3.013848876953125000e+02 -2.968841552734375000e+00 9.999999776482582092e-03 0.000000000000000000e+00 1.979342163085937500e+03 1.948522806167602539e+00 3.000000000000000000e+00 1.646343383789062500e+02 -8.575000000000000000e+01 5.175000000000000000e+01
4.500000000000000000e+01 6.548846153846153584e+02 3.160783691406250000e+02 -2.945190429687500000e+00 9.999999776482582092e-03 0.000000000000000000e+00 1.981672119140625000e+03 1.937449336051940918e+00 4.000000000000000000e+00 1.575185241699218750e+02 -8.525000000000000000e+01 5.175000000000000000e+01
2.600000000000000000e+01 6.481538461538461888e+02 3.396916198730468750e+02 -2.921569824218750000e+00 9.999999776482582092e-03 0.000000000000000000e+00 1.984001953125000000e+03 1.927267909049987793e+00 3.000000000000000000e+00 1.638378295898437500e+02 -8.475000000000000000e+01 5.175000000000000000e+01
3.700000000000000000e+01 6.403692307692308532e+02 3.623471984863281250e+02 -2.865783691406250000e+00 9.999999776482582092e-03 0.000000000000000000e+00 1.988518188476562500e+03 1.917324662208557129e+00 3.000000000000000000e+00 1.069773864746093750e+02 -8.425000000000000000e+01 5.175000000000000000e+01
3.600000000000000000e+01 6.279461538461538339e+02 3.626140747070312500e+02 -2.561401367187500000e+00 9.999999776482582092e-03 0.000000000000000000e+00 2.010668579101562500e+03 1.906418800354003906e+00 3.000000000000000000e+00 6.965806579589843750e+01 -8.325000000000000000e+01 5.175000000000000000e+01
1.200000000000000000e+01 6.275076923076921958e+02 3.544058532714843750e+02 -2.409210205078125000e+00 9.999999776482582092e-03 0.000000000000000000e+00 2.021743774414062500e+03 1.897459149360656738e+00 2.000000000000000000e+00 6.332442474365234375e+01 -8.275000000000000000e+01 5.175000000000000000e+01
1.600000000000000000e+01 6.176692307692309214e+02 3.480152893066406250e+02 -2.479064941406250000e+00 9.999999776482582092e-03 0.000000000000000000e+00 1.950198608398437500e+03 1.888184905052185059e+00 2.000000000000000000e+00 5.769877624511718750e+01 -8.225000000000000000e+01 5.175000000000000000e+01
1.700000000000000000e+01 6.162923076923078725e+02 3.397947082519531250e+02 -3.062866210937500000e+00 9.999999776482582092e-03 0.000000000000000000e+00 1.641867675781250000e+03 1.866352319717407227e+00 2.000000000000000000e+00 3.465790557861328125e+01 -8.125000000000000000e+01 5.175000000000000000e+01
1.600000000000000000e+01 7.184692307692306485e+02 3.671546630859375000e+02 -2.415588378906250000e+00 1.012064889073371887e-01 0.000000000000000000e+00 1.951704345703125000e+03 7.488520145416259766e-01 2.000000000000000000e+00 6.597674560546875000e+01 -7.825000000000000000e+01 5.175000000000000000e+01
5.500000000000000000e+01 1.112500000000000455e+03 4.859584655761718750e+02 -4.003295898437500000e+00 3.411627113819122314e-01 0.000000000000000000e+00 1.505259765625000000e+03 8.133096694946289062e-01 4.000000000000000000e+00 8.259348754882812500e+02 -6.775000000000000000e+01 5.175000000000000000e+01
6.400000000000000000e+01 1.074738461538461706e+03 4.961128845214843750e+02 -3.991607666015625000e+00 5.152075886726379395e-01 0.000000000000000000e+00 1.507241577148437500e+03 1.133127808570861816e+00 4.000000000000000000e+00 8.089524536132812500e+02 -6.725000000000000000e+01 5.175000000000000000e+01
5.000000000000000000e+01 9.602153846153850054e+02 4.992331542968750000e+02 -3.962432861328125000e+00 2.340245246887207031e-01 0.000000000000000000e+00 1.512660034179687500e+03 1.414535045623779297e+00 4.000000000000000000e+00 6.348272094726562500e+02 -6.675000000000000000e+01 5.175000000000000000e+01
4.600000000000000000e+01 8.733461538461542659e+02 5.062237548828125000e+02 -3.933258056640625000e+00 2.454797327518463135e-01 0.000000000000000000e+00 1.518078369140625000e+03 1.151910781860351562e+00 4.000000000000000000e+00 6.174445800781250000e+02 -6.625000000000000000e+01 5.175000000000000000e+01
5.000000000000000000e+01 7.919076923076924004e+02 5.076701354980468750e+02 -3.904052734375000000e+00 3.030402958393096924e-01 0.000000000000000000e+00 1.523496704101562500e+03 1.658243060111999512e+00 4.000000000000000000e+00 6.946812744140625000e+02 -6.575000000000000000e+01 5.175000000000000000e+01
5.200000000000000000e+01 9.535615384615388166e+02 4.842623291015625000e+02 -3.694854736328125000e+00 3.893578648567199707e-01 0.000000000000000000e+00 1.542835937500000000e+03 1.566599130630493164e+00 4.000000000000000000e+00 7.067975463867187500e+02 -6.475000000000000000e+01 5.175000000000000000e+01
5.100000000000000000e+01 9.951692307692308077e+02 4.473559265136718750e+02 -3.247222900390625000e+00 2.726007103919982910e-01 0.000000000000000000e+00 1.575050170898437500e+03 1.576299190521240234e+00 4.000000000000000000e+00 6.065104980468750000e+02 -6.325000000000000000e+01 5.175000000000000000e+01
2.300000000000000000e+01 9.934769230769228443e+02 4.440148315429687500e+02 -3.030334472656250000e+00 2.055884301662445068e-01 0.000000000000000000e+00 1.586710571289062500e+03 1.587542295455932617e+00 3.000000000000000000e+00 5.578904418945312500e+02 -6.275000000000000000e+01 5.175000000000000000e+01
6.200000000000000000e+01 1.040815384615384119e+03 4.462725219726562500e+02 -2.813446044921875000e+00 1.802226006984710693e-01 0.000000000000000000e+00 1.598370849609375000e+03 1.603137731552124023e+00 4.000000000000000000e+00 4.587349853515625000e+02 -6.225000000000000000e+01 5.175000000000000000e+01
6.000000000000000000e+01 1.091361538461538430e+03 4.771199340820312500e+02 -1.848205566406250000e+00 1.323461979627609253e-01 0.000000000000000000e+00 1.593658325195312500e+03 1.617668032646179199e+00 4.000000000000000000e+00 4.619710388183593750e+02 -6.075000000000000000e+01 5.175000000000000000e+01
5.300000000000000000e+01 1.075253846153846325e+03 5.047204284667968750e+02 -9.715576171875000000e-01 9.999999776482582092e-03 0.000000000000000000e+00 1.579832519531250000e+03 1.703101754188537598e+00 4.000000000000000000e+00 3.769444580078125000e+02 -5.925000000000000000e+01 5.175000000000000000e+01
7.000000000000000000e+01 1.118753846153846553e+03 5.544877319335937500e+02 -5.161437988281250000e-01 0.000000000000000000e+00 0.000000000000000000e+00 1.573360595703125000e+03 1.638965725898742676e+00 4.000000000000000000e+00 2.338056640625000000e+02 -5.825000000000000000e+01 5.175000000000000000e+01
5.700000000000000000e+01 1.162984615384615836e+03 5.581643066406250000e+02 -2.987670898437500000e-01 9.999999776482582092e-03 0.000000000000000000e+00 1.565868896484375000e+03 1.449099779129028320e+00 4.000000000000000000e+00 3.452944641113281250e+02 -5.775000000000000000e+01 5.175000000000000000e+01
3.900000000000000000e+01 4.990846153846153470e+02 1.206661987304687500e+02 -2.948303222656250000e-01 0.000000000000000000e+00 0.000000000000000000e+00 2.496429931640625000e+03 1.078829526901245117e+00 3.000000000000000000e+00 2.791193847656250000e+02 -9.925000000000000000e+01 5.225000000000000000e+01
4.200000000000000000e+01 4.903923076923074973e+02 1.195291900634765625e+02 -3.572387695312500000e-01 0.000000000000000000e+00 0.000000000000000000e+00 2.496987792968750000e+03 8.693931698799133301e-01 3.000000000000000000e+00 2.435746307373046875e+02 -9.875000000000000000e+01 5.225000000000000000e+01
2.900000000000000000e+01 7.246538461538464162e+02 2.400557861328125000e+02 -2.188690185546875000e+00 9.999999776482582092e-03 0.000000000000000000e+00 2.178973144531250000e+03 1.374262332916259766e+00 3.000000000000000000e+00 3.738237304687500000e+02 -9.325000000000000000e+01 5.225000000000000000e+01
6.200000000000000000e+01 7.873615384615386574e+02 2.702615356445312500e+02 -2.617980957031250000e+00 1.127694249153137207e-01 0.000000000000000000e+00 2.073062744140625000e+03 1.969556212425231934e+00 4.000000000000000000e+00 3.906453247070312500e+02 -9.125000000000000000e+01 5.225000000000000000e+01
5.700000000000000000e+01 7.455769230769230944e+02 2.762142639160156250e+02 -3.177612304687500000e+00 1.181697025895118713e-01 0.000000000000000000e+00 1.970515380859375000e+03 1.535601615905761719e+00 4.000000000000000000e+00 2.621456604003906250e+02 -8.875000000000000000e+01 5.225000000000000000e+01
4.600000000000000000e+01 7.101999999999999318e+02 2.776895751953125000e+02 -3.378906250000000000e+00 1.375659108161926270e-01 0.000000000000000000e+00 1.938261718750000000e+03 1.917183756828308105e+00 4.000000000000000000e+00 2.606851196289062500e+02 -8.775000000000000000e+01 5.225000000000000000e+01
1.300000000000000000e+01 6.844538461538460297e+02 2.792373657226562500e+02 -3.510284423828125000e+00 1.201531291007995605e-01 0.000000000000000000e+00 1.916780761718750000e+03 1.932011604309082031e+00 2.000000000000000000e+00 2.086236114501953125e+02 -8.675000000000000000e+01 5.225000000000000000e+01
1.700000000000000000e+01 6.656153846153843006e+02 2.798366699218750000e+02 -3.575958251953125000e+00 1.201978400349617004e-01 0.000000000000000000e+00 1.906040405273437500e+03 1.930486559867858887e+00 2.000000000000000000e+00 1.837758636474609375e+02 -8.625000000000000000e+01 5.225000000000000000e+01
6.000000000000000000e+00 6.172846153846153356e+02 3.352937927246093750e+02 -3.066467285156250000e+00 1.201985552906990051e-01 0.000000000000000000e+00 1.938158569335937500e+03 1.878993988037109375e+00 1.000000000000000000e+00 8.603842926025390625e+01 -8.375000000000000000e+01 5.225000000000000000e+01
3.800000000000000000e+01 6.066615384615383846e+02 3.386948547363281250e+02 -2.865692138671875000e+00 1.173500120639801025e-01 0.000000000000000000e+00 1.951650390625000000e+03 1.869069933891296387e+00 3.000000000000000000e+00 5.864216995239257812e+01 -8.325000000000000000e+01 5.225000000000000000e+01
2.800000000000000000e+01 5.934076923076922867e+02 3.376535644531250000e+02 -2.664916992187500000e+00 1.144655197858810425e-01 0.000000000000000000e+00 1.965142211914062500e+03 1.866454124450683594e+00 3.000000000000000000e+00 4.468138504028320312e+01 -8.275000000000000000e+01 5.225000000000000000e+01
2.400000000000000000e+01 5.785538461538461661e+02 3.369729614257812500e+02 -2.773864746093750000e+00 1.125414073467254639e-01 0.000000000000000000e+00 1.864672119140625000e+03 1.865608692169189453e+00 3.000000000000000000e+00 3.834385681152343750e+01 -8.225000000000000000e+01 5.225000000000000000e+01
1.400000000000000000e+01 6.888846153846154721e+02 3.673020019531250000e+02 -2.598663330078125000e+00 1.186616718769073486e-01 0.000000000000000000e+00 1.906228149414062500e+03 7.376835942268371582e-01 2.000000000000000000e+00 2.981931495666503906e+01 -7.825000000000000000e+01 5.225000000000000000e+01
1.600000000000000000e+01 7.997538461538459842e+02 4.796292724609375000e+02 -4.804168701171875000e+00 3.348051607608795166e-01 0.000000000000000000e+00 1.405539184570312500e+03 1.608154773712158203e+00 2.000000000000000000e+00 5.894629516601562500e+02 -6.575000000000000000e+01 5.225000000000000000e+01
4.600000000000000000e+01 8.382000000000001592e+02 4.594784851074218750e+02 -4.767791748046875000e+00 4.173228740692138672e-01 0.000000000000000000e+00 1.412469238281250000e+03 1.590043902397155762e+00 4.000000000000000000e+00 6.789588623046875000e+02 -6.525000000000000000e+01 5.225000000000000000e+01
4.100000000000000000e+01 8.858615384615382027e+02 4.234013977050781250e+02 -4.703063964843750000e+00 3.099287748336791992e-01 0.000000000000000000e+00 1.421748901367187500e+03 1.583799481391906738e+00 3.000000000000000000e+00 5.970218505859375000e+02 -6.475000000000000000e+01 5.225000000000000000e+01
2.300000000000000000e+01 9.039692307692309896e+02 3.955249938964843750e+02 -4.638336181640625000e+00 2.994574606418609619e-01 0.000000000000000000e+00 1.431028686523437500e+03 1.595801115036010742e+00 3.000000000000000000e+00 5.318776245117187500e+02 -6.425000000000000000e+01 5.225000000000000000e+01
4.000000000000000000e+01 9.503230769230772239e+02 3.907983093261718750e+02 -4.349700927734375000e+00 2.505666613578796387e-01 0.000000000000000000e+00 1.455065673828125000e+03 1.460273742675781250e+00 3.000000000000000000e+00 5.462098388671875000e+02 -6.325000000000000000e+01 5.225000000000000000e+01
4.700000000000000000e+01 9.822999999999999545e+02 3.935346374511718750e+02 -4.125793457031250000e+00 2.445173114538192749e-01 0.000000000000000000e+00 1.469822998046875000e+03 1.550946116447448730e+00 4.000000000000000000e+00 5.274482421875000000e+02 -6.275000000000000000e+01 5.225000000000000000e+01
6.800000000000000000e+01 1.022969230769230990e+03 4.330146484375000000e+02 -3.640930175781250000e+00 1.899333000183105469e-01 0.000000000000000000e+00 1.498712524414062500e+03 1.623823642730712891e+00 4.000000000000000000e+00 4.749559326171875000e+02 -6.175000000000000000e+01 5.225000000000000000e+01
6.800000000000000000e+01 1.048123076923076724e+03 4.568274536132812500e+02 -3.268737792968750000e+00 1.776243299245834351e-01 0.000000000000000000e+00 1.510969726562500000e+03 1.626996517181396484e+00 4.000000000000000000e+00 4.361133728027343750e+02 -6.125000000000000000e+01 5.225000000000000000e+01
1.300000000000000000e+01 1.136723076923076405e+03 5.299232788085937500e+02 -1.855987548828125000e+00 1.430359482765197754e-01 0.000000000000000000e+00 1.550421142578125000e+03 9.485390186309814453e-01 2.000000000000000000e+00 4.383841857910156250e+02 -5.925000000000000000e+01 5.225000000000000000e+01
4.500000000000000000e+01 1.167907692307692741e+03 5.509283447265625000e+02 -1.534454345703125000e+00 1.641822308301925659e-01 0.000000000000000000e+00 1.556293457031250000e+03 9.134303331375122070e-01 4.000000000000000000e+00 5.152407226562500000e+02 -5.875000000000000000e+01 5.225000000000000000e+01
6.100000000000000000e+01 1.172469230769231444e+03 5.574579467773437500e+02 -1.212951660156250000e+00 9.999999776482582092e-03 0.000000000000000000e+00 1.562165649414062500e+03 1.375530242919921875e+00 4.000000000000000000e+00 3.617422485351562500e+02 -5.825000000000000000e+01 5.225000000000000000e+01
5.100000000000000000e+01 1.195646153846153993e+03 5.082822570800781250e+02 -3.425598144531250000e-01 9.999999776482582092e-03 0.000000000000000000e+00 1.553686279296875000e+03 6.005246043205261230e-01 4.000000000000000000e+00 3.579460144042968750e+02 -5.675000000000000000e+01 5.225000000000000000e+01
3.000000000000000000e+01 1.181707692307692014e+03 4.479214782714843750e+02 -5.526733398437500000e-02 9.999999776482582092e-03 0.000000000000000000e+00 1.550068969726562500e+03 6.034866571426391602e-01 3.000000000000000000e+00 2.046462249755859375e+02 -5.625000000000000000e+01 5.225000000000000000e+01
3.600000000000000000e+01 5.024461538461538339e+02 1.520909576416015625e+02 -7.103271484375000000e-01 0.000000000000000000e+00 0.000000000000000000e+00 2.429514892578125000e+03 8.722255825996398926e-01 3.000000000000000000e+00 2.605032653808593750e+02 -9.925000000000000000e+01 5.275000000000000000e+01
2.000000000000000000e+01 7.309846153846153811e+02 2.616279296875000000e+02 -2.811401367187500000e+00 9.999999776482582092e-03 0.000000000000000000e+00 2.064604980468750000e+03 1.490094661712646484e+00 3.000000000000000000e+00 3.155201416015625000e+02 -9.225000000000000000e+01 5.275000000000000000e+01
6.500000000000000000e+01 7.452076923076917865e+02 2.687752075195312500e+02 -2.904876708984375000e+00 1.195028722286224365e-01 0.000000000000000000e+00 2.039539428710937500e+03 1.956904649734497070e+00 4.000000000000000000e+00 3.172637023925781250e+02 -9.175000000000000000e+01 5.275000000000000000e+01
2.900000000000000000e+01 7.513923076923074404e+02 2.671164855957031250e+02 -3.193847656250000000e+00 1.362945884466171265e-01 0.000000000000000000e+00 1.974337524414062500e+03 1.941096425056457520e+00 3.000000000000000000e+00 3.020862731933593750e+02 -9.025000000000000000e+01 5.275000000000000000e+01
3.100000000000000000e+01 6.900692307692310123e+02 2.763525695800781250e+02 -3.826354980468750000e+00 1.890784502029418945e-01 0.000000000000000000e+00 1.858174438476562500e+03 1.883088350296020508e+00 3.000000000000000000e+00 2.004393463134765625e+02 -8.725000000000000000e+01 5.275000000000000000e+01
4.000000000000000000e+01 6.649000000000000909e+02 2.776918640136718750e+02 -3.892700195312500000e+00 1.576946079730987549e-01 0.000000000000000000e+00 1.844501220703125000e+03 1.903575420379638672e+00 3.000000000000000000e+00 1.848229827880859375e+02 -8.675000000000000000e+01 5.275000000000000000e+01
6.000000000000000000e+01 6.536769230769225487e+02 2.768323669433593750e+02 -3.959075927734375000e+00 1.661595106124877930e-01 0.000000000000000000e+00 1.830828125000000000e+03 1.899810552597045898e+00 4.000000000000000000e+00 1.685070953369140625e+02 -8.625000000000000000e+01 5.275000000000000000e+01
2.800000000000000000e+01 6.450846153846152902e+02 2.736302185058593750e+02 -3.885375976562500000e+00 1.711216270923614502e-01 0.000000000000000000e+00 1.832346191406250000e+03 1.881765961647033691e+00 3.000000000000000000e+00 1.574799804687500000e+02 -8.575000000000000000e+01 5.275000000000000000e+01
4.000000000000000000e+01 6.230538461538460524e+02 2.747363281250000000e+02 -3.737976074218750000e+00 1.877507418394088745e-01 0.000000000000000000e+00 1.835382324218750000e+03 1.857537746429443359e+00 3.000000000000000000e+00 1.446756896972656250e+02 -8.475000000000000000e+01 5.275000000000000000e+01
3.200000000000000000e+01 5.986923076923076223e+02 3.064707946777343750e+02 -3.434051513671875000e+00 1.628028005361557007e-01 0.000000000000000000e+00 1.851237792968750000e+03 1.842801570892333984e+00 3.000000000000000000e+00 7.985486602783203125e+01 -8.375000000000000000e+01 5.275000000000000000e+01
5.500000000000000000e+01 5.779461538461537202e+02 3.236518859863281250e+02 -3.036193847656250000e+00 1.503096073865890503e-01 0.000000000000000000e+00 1.874784667968750000e+03 1.828247189521789551e+00 4.000000000000000000e+00 2.268241500854492188e+01 -8.275000000000000000e+01 5.275000000000000000e+01
1.100000000000000000e+01 6.781000000000002501e+02 3.767337036132812500e+02 -2.935882568359375000e+00 1.489255726337432861e-01 0.000000000000000000e+00 1.825751098632812500e+03 7.258946299552917480e-01 2.000000000000000000e+00 6.026620483398437500e+01 -7.825000000000000000e+01 5.275000000000000000e+01
1.700000000000000000e+01 7.046846153846153129e+02 3.823118286132812500e+02 -3.202636718750000000e+00 1.888113319873809814e-01 0.000000000000000000e+00 1.783880981445312500e+03 7.170402407646179199e-01 2.000000000000000000e+00 1.279920120239257812e+02 -7.775000000000000000e+01 5.275000000000000000e+01
3.900000000000000000e+01 7.264153846153844825e+02 3.857262573242187500e+02 -3.469360351562500000e+00 2.114136964082717896e-01 0.000000000000000000e+00 1.742010864257812500e+03 7.084628939628601074e-01 3.000000000000000000e+00 1.912310638427734375e+02 -7.725000000000000000e+01 5.275000000000000000e+01
2.500000000000000000e+01 7.725846153846152902e+02 3.859028320312500000e+02 -3.992401123046875000e+00 2.342623770236968994e-01 0.000000000000000000e+00 1.663889160156250000e+03 6.919341087341308594e-01 3.000000000000000000e+00 2.399043426513671875e+02 -7.625000000000000000e+01 5.275000000000000000e+01
5.400000000000000000e+01 8.487769230769233673e+02 3.889319458007812500e+02 -4.895080566406250000e+00 3.320329487323760986e-01 0.000000000000000000e+00 1.508519775390625000e+03 6.570490598678588867e-01 4.000000000000000000e+00 3.901697082519531250e+02 -7.375000000000000000e+01 5.275000000000000000e+01
3.100000000000000000e+01 9.548923076923078952e+02 4.550722656250000000e+02 -4.783691406250000000e+00 4.037780463695526123e-01 0.000000000000000000e+00 1.375436523437500000e+03 1.346886992454528809e+00 3.000000000000000000e+00 6.483457641601562500e+02 -6.925000000000000000e+01 5.275000000000000000e+01
1.600000000000000000e+01 9.683615384615385437e+02 4.682633361816406250e+02 -4.860168457031250000e+00 3.764705061912536621e-01 0.000000000000000000e+00 1.366156250000000000e+03 1.342240810394287109e+00 2.000000000000000000e+00 6.706712036132812500e+02 -6.875000000000000000e+01 5.275000000000000000e+01
3.800000000000000000e+01 9.553384615384610470e+02 4.794615173339843750e+02 -5.013061523437500000e+00 3.748289048671722412e-01 0.000000000000000000e+00 1.347595581054687500e+03 1.316919803619384766e+00 3.000000000000000000e+00 6.437436523437500000e+02 -6.775000000000000000e+01 5.275000000000000000e+01
3.900000000000000000e+01 9.557076923076923549e+02 3.646621704101562500e+02 -4.872497558593750000e+00 3.264421820640563965e-01 0.000000000000000000e+00 1.384717163085937500e+03 1.524299383163452148e+00 3.000000000000000000e+00 5.570805664062500000e+02 -6.325000000000000000e+01 5.275000000000000000e+01
6.300000000000000000e+01 9.801461538461541068e+02 4.455589599609375000e+02 -4.092376708984375000e+00 1.841091364622116089e-01 0.000000000000000000e+00 1.433473510742187500e+03 1.642592072486877441e+00 4.000000000000000000e+00 4.176113586425781250e+02 -6.175000000000000000e+01 5.275000000000000000e+01
5.300000000000000000e+01 1.051730769230769738e+03 5.005212402343750000e+02 -3.296936035156250000e+00 2.150969952344894409e-01 0.000000000000000000e+00 1.466199340820312500e+03 1.634405612945556641e+00 4.000000000000000000e+00 4.427646179199218750e+02 -6.075000000000000000e+01 5.275000000000000000e+01
7.200000000000000000e+01 1.055961538461538566e+03 5.103972167968750000e+02 -2.899200439453125000e+00 1.050765588879585266e-01 0.000000000000000000e+00 1.482562255859375000e+03 1.624013781547546387e+00 4.000000000000000000e+00 2.888370971679687500e+02 -6.025000000000000000e+01 5.275000000000000000e+01
6.000000000000000000e+01 1.104523076923076815e+03 5.159888305664062500e+02 -2.514648437500000000e+00 1.561134904623031616e-01 0.000000000000000000e+00 1.495607055664062500e+03 1.526994824409484863e+00 4.000000000000000000e+00 4.204334716796875000e+02 -5.975000000000000000e+01 5.275000000000000000e+01
5.100000000000000000e+01 1.130184615384615199e+03 5.247004394531250000e+02 -2.143249511718750000e+00 1.311841905117034912e-01 0.000000000000000000e+00 1.505333862304687500e+03 1.543492674827575684e+00 4.000000000000000000e+00 3.681112365722656250e+02 -5.925000000000000000e+01 5.275000000000000000e+01
4.300000000000000000e+01 1.144161538461538385e+03 5.363370971679687500e+02 -1.771850585937500000e+00 1.172099336981773376e-01 0.000000000000000000e+00 1.515060546875000000e+03 1.359657526016235352e+00 3.000000000000000000e+00 3.700299377441406250e+02 -5.875000000000000000e+01 5.275000000000000000e+01
6.300000000000000000e+01 1.173169230769230353e+03 5.426690673828125000e+02 -1.078857421875000000e+00 1.093920990824699402e-01 0.000000000000000000e+00 1.515560424804687500e+03 6.088246107101440430e-01 4.000000000000000000e+00 3.679127197265625000e+02 -5.775000000000000000e+01 5.275000000000000000e+01
5.900000000000000000e+01 1.175369230769231308e+03 5.247181396484375000e+02 -7.738342285156250000e-01 9.999999776482582092e-03 0.000000000000000000e+00 1.500015625000000000e+03 6.035017967224121094e-01 4.000000000000000000e+00 3.426024475097656250e+02 -5.725000000000000000e+01 5.275000000000000000e+01
5.600000000000000000e+01 1.158899999999999864e+03 4.947033996582031250e+02 -4.688415527343750000e-01 9.999999776482582092e-03 0.000000000000000000e+00 1.484470825195312500e+03 6.118850708007812500e-01 4.000000000000000000e+00 1.988577880859375000e+02 -5.675000000000000000e+01 5.275000000000000000e+01
4.600000000000000000e+01 6.057769230769229125e+02 1.847959899902343750e+02 -2.228363037109375000e+00 9.999999776482582092e-03 0.000000000000000000e+00 2.232230712890625000e+03 1.451994657516479492e+00 4.000000000000000000e+00 2.757897644042968750e+02 -9.625000000000000000e+01 5.325000000000000000e+01
4.400000000000000000e+01 6.552538461538460979e+02 2.626879882812500000e+02 -4.130706787109375000e+00 2.003007531166076660e-01 0.000000000000000000e+00 1.789420776367187500e+03 1.895275712013244629e+00 3.000000000000000000e+00 1.805821228027343750e+02 -8.725000000000000000e+01 5.325000000000000000e+01
1.900000000000000000e+01 6.516538461538463025e+02 2.705459289550781250e+02 -4.201293945312500000e+00 2.102406024932861328e-01 0.000000000000000000e+00 1.771774169921875000e+03 1.877402305603027344e+00 2.000000000000000000e+00 1.670778808593750000e+02 -8.675000000000000000e+01 5.325000000000000000e+01
8.000000000000000000e+00 6.391692307692309214e+02 2.694108581542968750e+02 -4.271850585937500000e+00 2.099648863077163696e-01 0.000000000000000000e+00 1.754127685546875000e+03 1.856103897094726562e+00 1.000000000000000000e+00 1.409779663085937500e+02 -8.625000000000000000e+01 5.325000000000000000e+01
2.700000000000000000e+01 6.289615384615382254e+02 2.668523559570312500e+02 -4.207641601562500000e+00 2.135815173387527466e-01 0.000000000000000000e+00 1.751591430664062500e+03 1.840268492698669434e+00 3.000000000000000000e+00 1.217113189697265625e+02 -8.575000000000000000e+01 5.325000000000000000e+01
1.600000000000000000e+01 6.194538461538460297e+02 2.638179931640625000e+02 -4.143402099609375000e+00 2.213387191295623779e-01 0.000000000000000000e+00 1.749055175781250000e+03 1.752151250839233398e+00 2.000000000000000000e+00 1.140221328735351562e+02 -8.525000000000000000e+01 5.325000000000000000e+01
1.500000000000000000e+01 6.094999999999998863e+02 2.629344177246093750e+02 -4.079193115234375000e+00 2.317182719707489014e-01 0.000000000000000000e+00 1.746519042968750000e+03 1.817404866218566895e+00 2.000000000000000000e+00 1.092278289794921875e+02 -8.475000000000000000e+01 5.325000000000000000e+01
1.900000000000000000e+01 5.830230769230768146e+02 2.749636840820312500e+02 -3.806793212890625000e+00 2.192522138357162476e-01 0.000000000000000000e+00 1.755371582031250000e+03 1.802699327468872070e+00 2.000000000000000000e+00 8.047300720214843750e+01 -8.375000000000000000e+01 5.325000000000000000e+01
2.300000000000000000e+01 5.735769230769229807e+02 2.914974975585937500e+02 -3.627410888671875000e+00 2.261675596237182617e-01 0.000000000000000000e+00 1.763975341796875000e+03 1.792220592498779297e+00 3.000000000000000000e+00 6.600099182128906250e+01 -8.325000000000000000e+01 5.325000000000000000e+01
2.800000000000000000e+01 5.590923076923074859e+02 3.051062622070312500e+02 -3.448028564453125000e+00 2.036116719245910645e-01 0.000000000000000000e+00 1.772579101562500000e+03 1.795553088188171387e+00 3.000000000000000000e+00 3.398936080932617188e+01 -8.275000000000000000e+01 5.325000000000000000e+01
2.500000000000000000e+01 7.167384615384618201e+02 3.879168090820312500e+02 -3.818847656250000000e+00 2.937584221363067627e-01 0.000000000000000000e+00 1.662135131835937500e+03 6.941826343536376953e-01 3.000000000000000000e+00 2.129518890380859375e+02 -7.725000000000000000e+01 5.325000000000000000e+01
2.600000000000000000e+01 7.305769230769235492e+02 3.878283691406250000e+02 -4.062896728515625000e+00 2.764231562614440918e-01 0.000000000000000000e+00 1.627565673828125000e+03 6.902059912681579590e-01 3.000000000000000000e+00 1.884621582031250000e+02 -7.675000000000000000e+01 5.325000000000000000e+01
2.000000000000000000e+01 7.370999999999999091e+02 3.854174194335937500e+02 -4.301605224609375000e+00 2.898727059364318848e-01 0.000000000000000000e+00 1.595568725585937500e+03 6.884635686874389648e-01 3.000000000000000000e+00 2.307463989257812500e+02 -7.625000000000000000e+01 5.325000000000000000e+01
1.700000000000000000e+01 7.426538461538463025e+02 3.818313903808593750e+02 -4.540313720703125000e+00 2.972530126571655273e-01 0.000000000000000000e+00 1.563571655273437500e+03 6.868922710418701172e-01 2.000000000000000000e+00 2.635260009765625000e+02 -7.575000000000000000e+01 5.325000000000000000e+01
1.900000000000000000e+01 9.212615384615385210e+02 4.766853942871093750e+02 -5.349548339843750000e+00 4.552588164806365967e-01 0.000000000000000000e+00 1.297655151367187500e+03 1.267585873603820801e+00 2.000000000000000000e+00 6.612443237304687500e+02 -6.775000000000000000e+01 5.325000000000000000e+01
2.800000000000000000e+01 9.083461538461544933e+02 4.773371582031250000e+02 -5.437469482421875000e+00 4.778791069984436035e-01 0.000000000000000000e+00 1.291192382812500000e+03 1.280468940734863281e+00 3.000000000000000000e+00 6.098084716796875000e+02 -6.725000000000000000e+01 5.325000000000000000e+01
1.500000000000000000e+01 8.860461538461536293e+02 4.776923828125000000e+02 -5.521118164062500000e+00 4.055752456188201904e-01 0.000000000000000000e+00 1.288690551757812500e+03 1.295196294784545898e+00 2.000000000000000000e+00 5.787210693359375000e+02 -6.675000000000000000e+01 5.325000000000000000e+01
2.700000000000000000e+01 8.495538461538458250e+02 4.747892456054687500e+02 -5.604736328125000000e+00 3.748197853565216064e-01 0.000000000000000000e+00 1.286188842773437500e+03 1.301111102104187012e+00 3.000000000000000000e+00 5.304384765625000000e+02 -6.625000000000000000e+01 5.325000000000000000e+01
2.900000000000000000e+01 8.505846153846158586e+02 4.412506408691406250e+02 -5.661163330078125000e+00 5.131911635398864746e-01 0.000000000000000000e+00 1.289375244140625000e+03 1.295114874839782715e+00 3.000000000000000000e+00 6.244659423828125000e+02 -6.525000000000000000e+01 5.325000000000000000e+01
4.000000000000000000e+01 8.755923076923080544e+02 4.133798522949218750e+02 -5.597045898437500000e+00 3.790163695812225342e-01 0.000000000000000000e+00 1.297793457031250000e+03 1.301952004432678223e+00 3.000000000000000000e+00 4.982647094726562500e+02 -6.475000000000000000e+01 5.325000000000000000e+01
4.500000000000000000e+01 9.040538461538460524e+02 3.899581604003906250e+02 -5.532897949218750000e+00 3.562097549438476562e-01 0.000000000000000000e+00 1.306211547851562500e+03 1.433759927749633789e+00 4.000000000000000000e+00 4.988752136230468750e+02 -6.425000000000000000e+01 5.325000000000000000e+01
4.700000000000000000e+01 9.164153846153847098e+02 3.790404052734375000e+02 -5.191833496093750000e+00 2.710934579372406006e-01 0.000000000000000000e+00 1.331790649414062500e+03 1.619050979614257812e+00 4.000000000000000000e+00 3.474044799804687500e+02 -6.325000000000000000e+01 5.325000000000000000e+01
5.300000000000000000e+01 9.420923076923080544e+02 3.938801879882812500e+02 -4.914855957031250000e+00 3.288998901844024658e-01 0.000000000000000000e+00 1.348951538085937500e+03 1.505182743072509766e+00 4.000000000000000000e+00 4.313728332519531250e+02 -6.275000000000000000e+01 5.325000000000000000e+01
5.500000000000000000e+01 1.054130769230769374e+03 5.164175415039062500e+02 -2.626739501953125000e+00 1.773328036069869995e-01 0.000000000000000000e+00 1.443007080078125000e+03 1.235031008720397949e+00 4.000000000000000000e+00 4.746421203613281250e+02 -5.975000000000000000e+01 5.325000000000000000e+01
4.000000000000000000e+01 1.146369230769231081e+03 5.392594604492187500e+02 -1.815032958984375000e+00 1.723193824291229248e-01 0.000000000000000000e+00 1.466481445312500000e+03 1.489190340042114258e+00 3.000000000000000000e+00 4.635406188964843750e+02 -5.875000000000000000e+01 5.325000000000000000e+01
5.000000000000000000e+01 1.141030769230769693e+03 5.542840576171875000e+02 -1.409179687500000000e+00 1.092674583196640015e-01 0.000000000000000000e+00 1.478218627929687500e+03 1.379018187522888184e+00 4.000000000000000000e+00 3.130515747070312500e+02 -5.825000000000000000e+01 5.325000000000000000e+01
2.100000000000000000e+01 1.118661538461538157e+03 5.634777221679687500e+02 -1.080322265625000000e+00 9.999999776482582092e-03 0.000000000000000000e+00 1.456015502929687500e+03 1.300138235092163086e+00 3.000000000000000000e+00 1.431709442138671875e+02 -5.775000000000000000e+01 5.325000000000000000e+01
4.700000000000000000e+01 1.140469230769230307e+03 5.603167724609375000e+02 -7.771301269531250000e-01 9.999999776482582092e-03 0.000000000000000000e+00 1.422499023437500000e+03 8.451565504074096680e-01 4.000000000000000000e+00 2.891454467773437500e+02 -5.725000000000000000e+01 5.325000000000000000e+01
5.800000000000000000e+01 1.135253846153846325e+03 5.473773803710937500e+02 -4.739379882812500000e-01 9.999999776482582092e-03 0.000000000000000000e+00 1.388982543945312500e+03 6.168093681335449219e-01 4.000000000000000000e+00 1.702579040527343750e+02 -5.675000000000000000e+01 5.325000000000000000e+01
4.900000000000000000e+01 1.098192307692308077e+03 5.251268920898437500e+02 -1.707458496093750000e-01 9.999999776482582092e-03 0.000000000000000000e+00 1.355466064453125000e+03 6.190457344055175781e-01 4.000000000000000000e+00 7.643042755126953125e+01 -5.625000000000000000e+01 5.325000000000000000e+01
3.800000000000000000e+01 5.771538461538463025e+02 2.313519134521484375e+02 -2.579620361328125000e+00 9.999999776482582092e-03 0.000000000000000000e+00 2.182115234375000000e+03 1.955693721771240234e+00 3.000000000000000000e+00 2.479501190185546875e+02 -9.675000000000000000e+01 5.375000000000000000e+01
4.700000000000000000e+01 6.616615384615384983e+02 1.985491180419921875e+02 -4.051544189453125000e+00 2.194759547710418701e-01 0.000000000000000000e+00 1.818286621093750000e+03 1.888270139694213867e+00 4.000000000000000000e+00 2.083670043945312500e+02 -8.925000000000000000e+01 5.375000000000000000e+01
7.000000000000000000e+00 6.450000000000000000e+02 2.205868072509765625e+02 -4.360290527343750000e+00 2.404844611883163452e-01 0.000000000000000000e+00 1.742286987304687500e+03 1.861212730407714844e+00 1.000000000000000000e+00 1.504816436767578125e+02 -8.775000000000000000e+01 5.375000000000000000e+01
3.100000000000000000e+01 6.361230769230767237e+02 2.370370941162109375e+02 -4.435089111328125000e+00 2.369225025177001953e-01 0.000000000000000000e+00 1.720667114257812500e+03 1.852071642875671387e+00 3.000000000000000000e+00 1.313624725341796875e+02 -8.725000000000000000e+01 5.375000000000000000e+01
3.100000000000000000e+01 6.309461538461539476e+02 2.549205627441406250e+02 -4.509857177734375000e+00 2.523824572563171387e-01 0.000000000000000000e+00 1.699047119140625000e+03 1.834196925163269043e+00 3.000000000000000000e+00 1.261088714599609375e+02 -8.675000000000000000e+01 5.375000000000000000e+01
2.000000000000000000e+01 6.197692307692303757e+02 2.542100219726562500e+02 -4.584655761718750000e+00 2.731825113296508789e-01 0.000000000000000000e+00 1.677427124023437500e+03 1.816125988960266113e+00 3.000000000000000000e+00 1.251497039794921875e+02 -8.625000000000000000e+01 5.375000000000000000e+01
1.500000000000000000e+01 6.043307692307691923e+02 2.517203369140625000e+02 -4.475128173828125000e+00 2.884766161441802979e-01 0.000000000000000000e+00 1.664246215820312500e+03 1.790818333625793457e+00 2.000000000000000000e+00 1.005793380737304688e+02 -8.525000000000000000e+01 5.375000000000000000e+01
1.600000000000000000e+01 5.822769230769227988e+02 2.458327331542968750e+02 -4.339355468750000000e+00 2.934165596961975098e-01 0.000000000000000000e+00 1.654071289062500000e+03 1.769924521446228027e+00 2.000000000000000000e+00 9.957243347167968750e+01 -8.425000000000000000e+01 5.375000000000000000e+01
1.500000000000000000e+01 5.720076923076920821e+02 2.506355895996093750e+02 -4.179534912109375000e+00 2.925117015838623047e-01 0.000000000000000000e+00 1.659505371093750000e+03 1.757073163986206055e+00 2.000000000000000000e+00 9.218434143066406250e+01 -8.375000000000000000e+01 5.375000000000000000e+01
1.400000000000000000e+01 5.436538461538464162e+02 2.802610473632812500e+02 -3.859832763671875000e+00 2.707082033157348633e-01 0.000000000000000000e+00 1.670373535156250000e+03 1.751308202743530273e+00 2.000000000000000000e+00 4.363236618041992188e+01 -8.275000000000000000e+01 5.375000000000000000e+01
3.400000000000000000e+01 7.253153846153844597e+02 3.843352966308593750e+02 -4.610809326171875000e+00 3.194294273853302002e-01 0.000000000000000000e+00 1.527248168945312500e+03 7.788778543472290039e-01 3.000000000000000000e+00 1.874211120605468750e+02 -7.625000000000000000e+01 5.375000000000000000e+01
1.800000000000000000e+01 7.861692307692308077e+02 3.889653015136718750e+02 -5.427429199218750000e+00 4.475109279155731201e-01 0.000000000000000000e+00 1.379242919921875000e+03 7.159720659255981445e-01 2.000000000000000000e+00 4.024974365234375000e+02 -7.275000000000000000e+01 5.375000000000000000e+01
2.600000000000000000e+01 8.684923076923078042e+02 4.640419311523437500e+02 -5.470123291015625000e+00 4.419907033443450928e-01 0.000000000000000000e+00 1.270849365234375000e+03 1.288715124130249023e+00 3.000000000000000000e+00 5.555601806640625000e+02 -6.875000000000000000e+01 5.375000000000000000e+01
3.800000000000000000e+01 9.386461538461537657e+02 4.655053100585937500e+02 -5.578094482421875000e+00 5.513480305671691895e-01 0.000000000000000000e+00 1.259281982421875000e+03 1.241267800331115723e+00 3.000000000000000000e+00 5.872821044921875000e+02 -6.825000000000000000e+01 5.375000000000000000e+01
2.000000000000000000e+01 8.689153846153848235e+02 4.674866027832031250e+02 -5.786041259765625000e+00 5.241319537162780762e-01 0.000000000000000000e+00 1.240408813476562500e+03 1.271195292472839355e+00 3.000000000000000000e+00 6.256788940429687500e+02 -6.725000000000000000e+01 5.375000000000000000e+01
3.200000000000000000e+01 8.679230769230766782e+02 4.671213073730468750e+02 -5.878051757812500000e+00 4.742039442062377930e-01 0.000000000000000000e+00 1.237364379882812500e+03 1.269914865493774414e+00 3.000000000000000000e+00 6.301507568359375000e+02 -6.675000000000000000e+01 5.375000000000000000e+01
2.200000000000000000e+01 8.459769230769231854e+02 4.643175048828125000e+02 -5.970092773437500000e+00 4.197277128696441650e-01 0.000000000000000000e+00 1.234319946289062500e+03 1.272323250770568848e+00 3.000000000000000000e+00 5.054393005371093750e+02 -6.625000000000000000e+01 5.375000000000000000e+01
2.900000000000000000e+01 8.335076923076921958e+02 4.524088134765625000e+02 -6.062103271484375000e+00 4.238702952861785889e-01 0.000000000000000000e+00 1.231275512695312500e+03 1.280392527580261230e+00 3.000000000000000000e+00 4.933794250488281250e+02 -6.575000000000000000e+01 5.375000000000000000e+01
3.000000000000000000e+01 9.246307692307697153e+02 3.891031494140625000e+02 -5.511138916015625000e+00 4.103499650955200195e-01 0.000000000000000000e+00 1.278864135742187500e+03 1.008834242820739746e+00 3.000000000000000000e+00 5.106763610839843750e+02 -6.325000000000000000e+01 5.375000000000000000e+01
1.400000000000000000e+01 9.647692307692304894e+02 4.318948974609375000e+02 -4.898376464843750000e+00 4.993884861469268799e-01 0.000000000000000000e+00 1.315023681640625000e+03 1.234178900718688965e+00 2.000000000000000000e+00 6.184483642578125000e+02 -6.225000000000000000e+01 5.375000000000000000e+01
1.100000000000000000e+01 1.084892307692307895e+03 5.463901977539062500e+02 -1.858245849609375000e+00 2.107421159744262695e-01 0.000000000000000000e+00 1.417902221679687500e+03 1.438909769058227539e+00 2.000000000000000000e+00 6.472888183593750000e+02 -5.875000000000000000e+01 5.375000000000000000e+01
2.000000000000000000e+01 1.105261538461539203e+03 5.669224853515625000e+02 -1.417938232421875000e+00 1.438199579715728760e-01 0.000000000000000000e+00 1.431649902343750000e+03 1.091006398200988770e+00 3.000000000000000000e+00 3.362295837402343750e+02 -5.825000000000000000e+01 5.375000000000000000e+01
5.600000000000000000e+01 1.105769230769230717e+03 5.785851440429687500e+02 -1.081817626953125000e+00 9.999999776482582092e-03 0.000000000000000000e+00 1.396470581054687500e+03 1.450048685073852539e+00 4.000000000000000000e+00 2.019593811035156250e+02 -5.775000000000000000e+01 5.375000000000000000e+01
2.700000000000000000e+01 4.974999999999999432e+02 2.602960205078125000e+02 -2.139709472656250000e+00 9.999999776482582092e-03 0.000000000000000000e+00 2.212203369140625000e+03 2.916991710662841797e+00 3.000000000000000000e+00 2.438747100830078125e+02 -9.925000000000000000e+01 5.425000000000000000e+01
2.400000000000000000e+01 4.904384615384615813e+02 2.791012268066406250e+02 -2.341156005859375000e+00 9.999999776482582092e-03 0.000000000000000000e+00 2.189585693359375000e+03 2.009690284729003906e+00 3.000000000000000000e+00 2.128028411865234375e+02 -9.875000000000000000e+01 5.425000000000000000e+01
4.300000000000000000e+01 5.359153846153845961e+02 2.835663452148437500e+02 -2.952941894531250000e+00 9.999999776482582092e-03 0.000000000000000000e+00 2.120664062500000000e+03 1.988507866859436035e+00 3.000000000000000000e+00 2.268510742187500000e+02 -9.725000000000000000e+01 5.425000000000000000e+01
5.600000000000000000e+01 6.076615384615386120e+02 3.036437377929687500e+02 -3.730407714843750000e+00 1.500986218452453613e-01 0.000000000000000000e+00 2.019473510742187500e+03 1.953529000282287598e+00 4.000000000000000000e+00 2.213763275146484375e+02 -9.525000000000000000e+01 5.425000000000000000e+01
2.400000000000000000e+01 6.507769230769231399e+02 2.114710693359375000e+02 -4.148468017578125000e+00 2.595403492450714111e-01 0.000000000000000000e+00 1.835050659179687500e+03 1.866635084152221680e+00 3.000000000000000000e+00 2.128008422851562500e+02 -9.075000000000000000e+01 5.425000000000000000e+01
1.900000000000000000e+01 6.412846153846154493e+02 1.807470703125000000e+02 -4.362701416015625000e+00 2.717904746532440186e-01 0.000000000000000000e+00 1.761968261718750000e+03 1.830848693847656250e+00 2.000000000000000000e+00 1.511853485107421875e+02 -8.925000000000000000e+01 5.425000000000000000e+01
1.200000000000000000e+01 6.380076923076921958e+02 1.855323791503906250e+02 -4.468688964843750000e+00 2.774412333965301514e-01 0.000000000000000000e+00 1.732960937500000000e+03 1.822305679321289062e+00 2.000000000000000000e+00 1.393016510009765625e+02 -8.875000000000000000e+01 5.425000000000000000e+01
3.100000000000000000e+01 6.230538461538460524e+02 2.026292877197265625e+02 -4.660430908203125000e+00 3.058215975761413574e-01 0.000000000000000000e+00 1.677506713867187500e+03 1.816636919975280762e+00 3.000000000000000000e+00 1.466175079345703125e+02 -8.775000000000000000e+01 5.425000000000000000e+01
2.200000000000000000e+01 6.138846153846153584e+02 2.162286987304687500e+02 -4.739440917968750000e+00 2.951112091541290283e-01 0.000000000000000000e+00 1.651913330078125000e+03 1.809648394584655762e+00 3.000000000000000000e+00 1.016369705200195312e+02 -8.725000000000000000e+01 5.425000000000000000e+01
2.700000000000000000e+01 6.010999999999999091e+02 2.383549346923828125e+02 -4.897430419921875000e+00 3.442011773586273193e-01 0.000000000000000000e+00 1.600726684570312500e+03 1.762316584587097168e+00 3.000000000000000000e+00 1.313892364501953125e+02 -8.625000000000000000e+01 5.425000000000000000e+01
3.000000000000000000e+01 5.884153846153847098e+02 2.396045532226562500e+02 -4.852142333984375000e+00 3.564947545528411865e-01 0.000000000000000000e+00 1.590081909179687500e+03 1.714799284934997559e+00 3.000000000000000000e+00 1.085509033203125000e+02 -8.575000000000000000e+01 5.425000000000000000e+01
9.000000000000000000e+00 5.784153846153842551e+02 2.404956054687500000e+02 -4.761596679687500000e+00 3.763749003410339355e-01 0.000000000000000000e+00 1.568792358398437500e+03 1.546361684799194336e+00 1.000000000000000000e+00 1.419202270507812500e+02 -8.475000000000000000e+01 5.425000000000000000e+01
2.200000000000000000e+01 5.425000000000002274e+02 2.608096618652343750e+02 -4.411956787109375000e+00 3.334086239337921143e-01 0.000000000000000000e+00 1.565903564453125000e+03 1.712824702262878418e+00 3.000000000000000000e+00 5.259692764282226562e+01 -8.325000000000000000e+01 5.425000000000000000e+01
1.900000000000000000e+01 6.330769230769230944e+02 3.814260253906250000e+02 -3.905883789062500000e+00 3.377016484737396240e-01 0.000000000000000000e+00 1.570005737304687500e+03 1.350113272666931152e+00 2.000000000000000000e+00 5.563983535766601562e+01 -7.875000000000000000e+01 5.425000000000000000e+01
2.300000000000000000e+01 7.194076923076926278e+02 3.818780822753906250e+02 -4.920013427734375000e+00 3.869039714336395264e-01 0.000000000000000000e+00 1.458927734375000000e+03 1.290428161621093750e+00 3.000000000000000000e+00 1.873245697021484375e+02 -7.625000000000000000e+01 5.425000000000000000e+01
2.300000000000000000e+01 7.396615384615386120e+02 3.774778747558593750e+02 -5.119384765625000000e+00 4.515029489994049072e-01 0.000000000000000000e+00 1.437687377929687500e+03 1.307563185691833496e+00 3.000000000000000000e+00 2.359928588867187500e+02 -7.575000000000000000e+01 5.425000000000000000e+01
1.800000000000000000e+01 7.391000000000004775e+02 3.724719543457031250e+02 -5.452484130859375000e+00 5.589933991432189941e-01 0.000000000000000000e+00 1.397982177734375000e+03 1.278072714805603027e+00 2.000000000000000000e+00 4.089580688476562500e+02 -7.475000000000000000e+01 5.425000000000000000e+01
3.100000000000000000e+01 7.665923076923074859e+02 3.750744323730468750e+02 -5.656951904296875000e+00 5.205299258232116699e-01 0.000000000000000000e+00 1.350913330078125000e+03 1.258222460746765137e+00 3.000000000000000000e+00 4.010698547363281250e+02 -7.325000000000000000e+01 5.425000000000000000e+01
2.100000000000000000e+01 7.851692307692303530e+02 3.876260070800781250e+02 -5.610229492187500000e+00 5.380623936653137207e-01 0.000000000000000000e+00 1.321817749023437500e+03 1.150875210762023926e+00 3.000000000000000000e+00 4.385557861328125000e+02 -7.225000000000000000e+01 5.425000000000000000e+01
1.900000000000000000e+01 8.020461538461529472e+02 3.912277832031250000e+02 -5.573822021484375000e+00 5.261896848678588867e-01 0.000000000000000000e+00 1.307432983398437500e+03 1.222773432731628418e+00 2.000000000000000000e+00 4.518924865722656250e+02 -7.175000000000000000e+01 5.425000000000000000e+01
4.200000000000000000e+01 8.440153846153848463e+02 4.477452697753906250e+02 -5.775085449218750000e+00 5.399773716926574707e-01 0.000000000000000000e+00 1.223195922851562500e+03 1.274653553962707520e+00 3.000000000000000000e+00 5.678230590820312500e+02 -6.875000000000000000e+01 5.425000000000000000e+01
1.700000000000000000e+01 8.480230769230772694e+02 4.505862121582031250e+02 -6.022521972656250000e+00 5.287954211235046387e-01 0.000000000000000000e+00 1.197774291992187500e+03 1.256821513175964355e+00 2.000000000000000000e+00 5.890216064453125000e+02 -6.775000000000000000e+01 5.425000000000000000e+01
1.000000000000000000e+01 8.389461538461538339e+02 4.513627319335937500e+02 -6.134613037109375000e+00 5.200415849685668945e-01 0.000000000000000000e+00 1.189625366210937500e+03 1.248768806457519531e+00 2.000000000000000000e+00 5.946597900390625000e+02 -6.725000000000000000e+01 5.425000000000000000e+01
2.100000000000000000e+01 8.449076923076924004e+02 4.517698364257812500e+02 -6.235015869140625000e+00 5.770110487937927246e-01 0.000000000000000000e+00 1.186038330078125000e+03 1.242289900779724121e+00 3.000000000000000000e+00 6.234536743164062500e+02 -6.675000000000000000e+01 5.425000000000000000e+01
2.000000000000000000e+01 8.953153846153844597e+02 4.020271301269531250e+02 -5.494659423828125000e+00 4.076239168643951416e-01 0.000000000000000000e+00 1.244936279296875000e+03 1.027272462844848633e+00 3.000000000000000000e+00 4.032789306640625000e+02 -6.275000000000000000e+01 5.425000000000000000e+01
6.800000000000000000e+01 4.965538461538460524e+02 2.557217864990234375e+02 -2.725311279296875000e+00 9.999999776482582092e-03 0.000000000000000000e+00 2.120430419921875000e+03 1.959447979927062988e+00 4.000000000000000000e+00 2.714523925781250000e+02 -9.975000000000000000e+01 5.475000000000000000e+01
5.100000000000000000e+01 4.999538461538462002e+02 2.722532348632812500e+02 -2.827972412109375000e+00 1.063503324985504150e-01 0.000000000000000000e+00 2.112399658203125000e+03 1.958368182182312012e+00 4.000000000000000000e+00 2.579449157714843750e+02 -9.925000000000000000e+01 5.475000000000000000e+01
5.200000000000000000e+01 4.961538461538461320e+02 2.869280090332031250e+02 -3.032775878906250000e+00 1.015820130705833435e-01 0.000000000000000000e+00 2.090017333984375000e+03 1.971893429756164551e+00 4.000000000000000000e+00 2.256657562255859375e+02 -9.875000000000000000e+01 5.475000000000000000e+01
4.500000000000000000e+01 4.935692307692307281e+02 2.913901977539062500e+02 -3.237579345703125000e+00 1.059533953666687012e-01 0.000000000000000000e+00 2.067635009765625000e+03 1.973253965377807617e+00 4.000000000000000000e+00 2.039223175048828125e+02 -9.825000000000000000e+01 5.475000000000000000e+01
4.500000000000000000e+01 5.104000000000000341e+02 2.915759582519531250e+02 -3.442413330078125000e+00 1.273780614137649536e-01 0.000000000000000000e+00 2.045252807617187500e+03 1.818712234497070312e+00 4.000000000000000000e+00 2.120570983886718750e+02 -9.775000000000000000e+01 5.475000000000000000e+01
2.300000000000000000e+01 6.292692307692308304e+02 2.143942108154296875e+02 -4.394165039062500000e+00 2.898061573505401611e-01 0.000000000000000000e+00 1.784464965820312500e+03 1.822839498519897461e+00 3.000000000000000000e+00 1.510532073974609375e+02 -9.125000000000000000e+01 5.475000000000000000e+01
1.300000000000000000e+01 6.157615384615384073e+02 1.864162139892578125e+02 -4.468780517578125000e+00 3.261632919311523438e-01 0.000000000000000000e+00 1.717286865234375000e+03 1.789377450942993164e+00 2.000000000000000000e+00 1.324907531738281250e+02 -8.975000000000000000e+01 5.475000000000000000e+01
6.000000000000000000e+00 6.144076923076924004e+02 1.852832031250000000e+02 -4.625640869140625000e+00 3.562365472316741943e-01 0.000000000000000000e+00 1.655533935546875000e+03 1.770111680030822754e+00 1.000000000000000000e+00 1.359491577148437500e+02 -8.875000000000000000e+01 5.475000000000000000e+01
2.600000000000000000e+01 5.915076923076926505e+02 2.195169982910156250e+02 -5.025207519531250000e+00 3.782308995723724365e-01 0.000000000000000000e+00 1.512257080078125000e+03 1.579684972763061523e+00 3.000000000000000000e+00 1.004575805664062500e+02 -8.725000000000000000e+01 5.475000000000000000e+01
1.100000000000000000e+01 5.588846153846153584e+02 2.345404663085937500e+02 -5.280700683593750000e+00 4.448732435703277588e-01 0.000000000000000000e+00 1.366782470703125000e+03 1.392198324203491211e+00 2.000000000000000000e+00 1.100313796997070312e+02 -8.475000000000000000e+01 5.475000000000000000e+01
1.900000000000000000e+01 5.492923076923075314e+02 2.389806518554687500e+02 -5.225860595703125000e+00 4.381286203861236572e-01 0.000000000000000000e+00 1.361501953125000000e+03 1.380286931991577148e+00 2.000000000000000000e+00 7.484780883789062500e+01 -8.425000000000000000e+01 5.475000000000000000e+01
1.400000000000000000e+01 5.317076923076924686e+02 2.753724365234375000e+02 -4.965301513671875000e+00 4.033328592777252197e-01 0.000000000000000000e+00 1.370935913085937500e+03 1.373259782791137695e+00 2.000000000000000000e+00 3.877664566040039062e+01 -8.325000000000000000e+01 5.475000000000000000e+01
3.600000000000000000e+01 5.266153846153846416e+02 2.874617309570312500e+02 -4.835052490234375000e+00 3.949807286262512207e-01 0.000000000000000000e+00 1.375652832031250000e+03 1.365926980972290039e+00 3.000000000000000000e+00 1.766699218750000000e+01 -8.275000000000000000e+01 5.475000000000000000e+01
1.600000000000000000e+01 6.958999999999997499e+02 3.771864013671875000e+02 -4.988983154296875000e+00 4.883525669574737549e-01 0.000000000000000000e+00 1.333418212890625000e+03 1.244656443595886230e+00 2.000000000000000000e+00 1.921137237548828125e+02 -7.725000000000000000e+01 5.475000000000000000e+01
2.800000000000000000e+01 7.028076923076920366e+02 3.783524780273437500e+02 -5.156402587890625000e+00 5.147644877433776855e-01 0.000000000000000000e+00 1.321368530273437500e+03 1.236187934875488281e+00 3.000000000000000000e+00 2.537943572998046875e+02 -7.675000000000000000e+01 5.475000000000000000e+01
2.300000000000000000e+01 7.028384615384615017e+02 3.772299499511718750e+02 -5.294067382812500000e+00 5.401811599731445312e-01 0.000000000000000000e+00 1.331898803710937500e+03 1.231288433074951172e+00 3.000000000000000000e+00 2.794515380859375000e+02 -7.625000000000000000e+01 5.475000000000000000e+01
2.400000000000000000e+01 7.216923076923077360e+02 3.750713195800781250e+02 -5.431732177734375000e+00 5.630126595497131348e-01 0.000000000000000000e+00 1.342428955078125000e+03 1.223887920379638672e+00 3.000000000000000000e+00 3.402325134277343750e+02 -7.575000000000000000e+01 5.475000000000000000e+01
6.000000000000000000e+00 7.215538461538460524e+02 3.735274353027343750e+02 -5.673522949218750000e+00 5.568256378173828125e-01 0.000000000000000000e+00 1.352155639648437500e+03 1.229192256927490234e+00 1.000000000000000000e+00 3.788477478027343750e+02 -7.475000000000000000e+01 5.475000000000000000e+01
1.700000000000000000e+01 7.351769230769233445e+02 3.701901550292968750e+02 -5.744079589843750000e+00 5.989661216735839844e-01 0.000000000000000000e+00 1.340018432617187500e+03 1.224604964256286621e+00 2.000000000000000000e+00 3.623228454589843750e+02 -7.425000000000000000e+01 5.475000000000000000e+01
2.000000000000000000e+01 7.450615384615383618e+02 3.689439086914062500e+02 -5.814666748046875000e+00 5.936686992645263672e-01 0.000000000000000000e+00 1.327881225585937500e+03 1.210425615310668945e+00 3.000000000000000000e+00 3.893669433593750000e+02 -7.375000000000000000e+01 5.475000000000000000e+01
1.200000000000000000e+01 7.492538461538460979e+02 3.690603942871093750e+02 -5.885223388671875000e+00 5.930857658386230469e-01 0.000000000000000000e+00 1.315744018554687500e+03 1.103667259216308594e+00 2.000000000000000000e+00 4.021051635742187500e+02 -7.325000000000000000e+01 5.475000000000000000e+01
2.700000000000000000e+01 7.647384615384619337e+02 3.922948913574218750e+02 -5.817474365234375000e+00 5.354970693588256836e-01 0.000000000000000000e+00 1.263603759765625000e+03 1.233731508255004883e+00 3.000000000000000000e+00 4.744165344238281250e+02 -7.125000000000000000e+01 5.475000000000000000e+01
1.700000000000000000e+01 8.122923076923070766e+02 4.395045166015625000e+02 -6.157104492187500000e+00 5.671430230140686035e-01 0.000000000000000000e+00 1.181498168945312500e+03 1.247309088706970215e+00 2.000000000000000000e+00 5.900407104492187500e+02 -6.825000000000000000e+01 5.475000000000000000e+01
2.400000000000000000e+01 8.140538461538458250e+02 4.400795898437500000e+02 -6.263458251953125000e+00 5.685336589813232422e-01 0.000000000000000000e+00 1.168440185546875000e+03 1.235217452049255371e+00 3.000000000000000000e+00 5.607415161132812500e+02 -6.775000000000000000e+01 5.475000000000000000e+01
8.000000000000000000e+00 8.297153846153846644e+02 4.397661437988281250e+02 -6.349151611328125000e+00 6.320198774337768555e-01 0.000000000000000000e+00 1.159468261718750000e+03 1.213451743125915527e+00 1.000000000000000000e+00 6.610838012695312500e+02 -6.725000000000000000e+01 5.475000000000000000e+01
3.300000000000000000e+01 8.226923076923079634e+02 4.444443664550781250e+02 -6.479339599609375000e+00 5.630550980567932129e-01 0.000000000000000000e+00 1.149696655273437500e+03 1.127340555191040039e+00 3.000000000000000000e+00 4.919622802734375000e+02 -6.625000000000000000e+01 5.475000000000000000e+01
2.900000000000000000e+01 8.221923076923075087e+02 4.417311401367187500e+02 -6.544433593750000000e+00 5.786459445953369141e-01 0.000000000000000000e+00 1.144810913085937500e+03 1.200060248374938965e+00 3.000000000000000000e+00 5.205924072265625000e+02 -6.575000000000000000e+01 5.475000000000000000e+01
2.400000000000000000e+01 8.205923076923071449e+02 4.342765808105468750e+02 -6.486267089843750000e+00 5.536118149757385254e-01 0.000000000000000000e+00 1.145605712890625000e+03 1.201384067535400391e+00 3.000000000000000000e+00 4.775017089843750000e+02 -6.525000000000000000e+01 5.475000000000000000e+01
1.200000000000000000e+01 8.345769230769229807e+02 3.985198059082031250e+02 -5.802734375000000000e+00 5.765643715858459473e-01 0.000000000000000000e+00 1.177593994140625000e+03 1.185336112976074219e+00 2.000000000000000000e+00 5.493787841796875000e+02 -6.325000000000000000e+01 5.475000000000000000e+01
1.700000000000000000e+01 8.443076923076920366e+02 4.024212036132812500e+02 -5.416961669921875000e+00 4.497916400432586670e-01 0.000000000000000000e+00 1.201516845703125000e+03 1.161587834358215332e+00 2.000000000000000000e+00 3.833635253906250000e+02 -6.275000000000000000e+01 5.475000000000000000e+01
8.000000000000000000e+00 8.622153846153846644e+02 4.145307617187500000e+02 -5.031219482421875000e+00 5.393349528312683105e-01 0.000000000000000000e+00 1.225439819335937500e+03 1.120435833930969238e+00 1.000000000000000000e+00 5.553965454101562500e+02 -6.225000000000000000e+01 5.475000000000000000e+01
5.200000000000000000e+01 8.786999999999997044e+02 4.454418029785156250e+02 -4.194274902343750000e+00 2.543426454067230225e-01 0.000000000000000000e+00 1.224589477539062500e+03 1.236153364181518555e+00 4.000000000000000000e+00 2.908436279296875000e+02 -6.125000000000000000e+01 5.475000000000000000e+01
2.900000000000000000e+01 8.857000000000005002e+02 4.546226196289062500e+02 -3.756195068359375000e+00 1.838919818401336670e-01 0.000000000000000000e+00 1.209555419921875000e+03 1.114781260490417480e+00 3.000000000000000000e+00 1.373125305175781250e+02 -6.075000000000000000e+01 5.475000000000000000e+01
3.000000000000000000e+01 8.951153846153840732e+02 4.628242492675781250e+02 -3.318084716796875000e+00 1.658542305231094360e-01 0.000000000000000000e+00 1.194521362304687500e+03 6.129660606384277344e-01 3.000000000000000000e+00 1.505392150878906250e+02 -6.025000000000000000e+01 5.475000000000000000e+01
2.800000000000000000e+01 9.084538461538461434e+02 4.750381774902343750e+02 -2.840240478515625000e+00 1.400392055511474609e-01 0.000000000000000000e+00 1.199866333007812500e+03 9.363127350807189941e-01 3.000000000000000000e+00 1.215829772949218750e+02 -5.975000000000000000e+01 5.475000000000000000e+01
4.200000000000000000e+01 5.050307692307691809e+02 2.610665893554687500e+02 -3.409301757812500000e+00 1.491190940141677856e-01 0.000000000000000000e+00 2.020283935546875000e+03 1.915284276008605957e+00 3.000000000000000000e+00 3.082076110839843750e+02 -9.975000000000000000e+01 5.525000000000000000e+01
4.300000000000000000e+01 5.111230769230770079e+02 2.754826049804687500e+02 -3.531982421875000000e+00 1.611028909683227539e-01 0.000000000000000000e+00 2.010561157226562500e+03 1.905774831771850586e+00 3.000000000000000000e+00 2.834948120117187500e+02 -9.925000000000000000e+01 5.525000000000000000e+01
2.900000000000000000e+01 5.159230769230769056e+02 2.832043151855468750e+02 -3.737670898437500000e+00 1.712922155857086182e-01 0.000000000000000000e+00 1.988904907226562500e+03 1.900099515914916992e+00 3.000000000000000000e+00 2.542550659179687500e+02 -9.875000000000000000e+01 5.525000000000000000e+01
6.700000000000000000e+01 5.241384615384615699e+02 2.862761535644531250e+02 -3.943359375000000000e+00 1.789712458848953247e-01 0.000000000000000000e+00 1.967248535156250000e+03 1.708469629287719727e+00 4.000000000000000000e+00 2.152008361816406250e+02 -9.825000000000000000e+01 5.525000000000000000e+01
4.500000000000000000e+01 5.684230769230769056e+02 2.828119812011718750e+02 -4.501708984375000000e+00 2.451198101043701172e-01 0.000000000000000000e+00 1.905629882812500000e+03 1.863451361656188965e+00 4.000000000000000000e+00 2.325866241455078125e+02 -9.675000000000000000e+01 5.525000000000000000e+01
3.900000000000000000e+01 5.759384615384614108e+02 2.829960632324218750e+02 -4.668273925781250000e+00 2.569814920425415039e-01 0.000000000000000000e+00 1.886207153320312500e+03 1.855453252792358398e+00 3.000000000000000000e+00 2.146466217041015625e+02 -9.625000000000000000e+01 5.525000000000000000e+01
1.700000000000000000e+01 6.003999999999998636e+02 1.984737091064453125e+02 -4.661437988281250000e+00 3.624574244022369385e-01 0.000000000000000000e+00 1.691178344726562500e+03 1.774159669876098633e+00 2.000000000000000000e+00 1.204354782104492188e+02 -9.075000000000000000e+01 5.525000000000000000e+01
2.500000000000000000e+01 5.912307692307690559e+02 1.870912017822265625e+02 -4.673065185546875000e+00 4.025259613990783691e-01 0.000000000000000000e+00 1.642125610351562500e+03 1.735814452171325684e+00 3.000000000000000000e+00 1.162058410644531250e+02 -8.975000000000000000e+01 5.525000000000000000e+01
1.000000000000000000e+01 5.847923076923076451e+02 2.111871185302734375e+02 -5.037353515625000000e+00 4.804198443889617920e-01 0.000000000000000000e+00 1.463620971679687500e+03 1.386557340621948242e+00 2.000000000000000000e+00 1.134973220825195312e+02 -8.775000000000000000e+01 5.525000000000000000e+01
1.200000000000000000e+01 5.693461538461538112e+02 2.273164520263671875e+02 -5.854064941406250000e+00 4.997662305831909180e-01 0.000000000000000000e+00 1.174747192382812500e+03 1.367695093154907227e+00 2.000000000000000000e+00 7.914701843261718750e+01 -8.625000000000000000e+01 5.525000000000000000e+01
1.800000000000000000e+01 5.427461538461537884e+02 2.272789916992187500e+02 -5.840393066406250000e+00 4.518590569496154785e-01 0.000000000000000000e+00 1.168618530273437500e+03 1.384732961654663086e+00 2.000000000000000000e+00 3.813983154296875000e+01 -8.575000000000000000e+01 5.525000000000000000e+01
2.100000000000000000e+01 6.911307692307685784e+02 3.734454040527343750e+02 -5.469177246093750000e+00 5.833627581596374512e-01 0.000000000000000000e+00 1.157829589843750000e+03 1.181763291358947754e+00 3.000000000000000000e+00 1.567905731201171875e+02 -7.725000000000000000e+01 5.525000000000000000e+01
2.000000000000000000e+01 6.954769230769228443e+02 3.741561889648437500e+02 -5.600067138671875000e+00 6.000324487686157227e-01 0.000000000000000000e+00 1.156242431640625000e+03 1.144980192184448242e+00 3.000000000000000000e+00 1.986261444091796875e+02 -7.675000000000000000e+01 5.525000000000000000e+01
3.000000000000000000e+01 6.989307692307688740e+02 3.743131713867187500e+02 -5.745758056640625000e+00 6.189165711402893066e-01 0.000000000000000000e+00 1.244768066406250000e+03 1.180152535438537598e+00 3.000000000000000000e+00 2.847834167480468750e+02 -7.575000000000000000e+01 5.525000000000000000e+01
1.600000000000000000e+01 7.069769230769229580e+02 3.724722290039062500e+02 -5.818603515625000000e+00 6.099654436111450195e-01 0.000000000000000000e+00 1.289030883789062500e+03 1.174552202224731445e+00 2.000000000000000000e+00 3.113682250976562500e+02 -7.525000000000000000e+01 5.525000000000000000e+01
3.600000000000000000e+01 7.150999999999999091e+02 3.723910522460937500e+02 -5.892059326171875000e+00 6.347454786300659180e-01 0.000000000000000000e+00 1.306889404296875000e+03 1.173542737960815430e+00 3.000000000000000000e+00 3.419106140136718750e+02 -7.475000000000000000e+01 5.525000000000000000e+01
1.200000000000000000e+01 7.176076923076923322e+02 3.695332031250000000e+02 -5.966094970703125000e+00 6.250486373901367188e-01 0.000000000000000000e+00 1.298343505859375000e+03 1.174491167068481445e+00 2.000000000000000000e+00 3.726172180175781250e+02 -7.425000000000000000e+01 5.525000000000000000e+01
2.800000000000000000e+01 7.309846153846154948e+02 3.675378417968750000e+02 -6.114166259765625000e+00 6.298828721046447754e-01 0.000000000000000000e+00 1.281251708984375000e+03 1.103930711746215820e+00 3.000000000000000000e+00 4.155745849609375000e+02 -7.325000000000000000e+01 5.525000000000000000e+01
1.800000000000000000e+01 8.038307692307691923e+02 4.235393981933593750e+02 -6.193267822265625000e+00 6.854236721992492676e-01 0.000000000000000000e+00 1.194215576171875000e+03 1.170737147331237793e+00 2.000000000000000000e+00 5.444483032226562500e+02 -6.975000000000000000e+01 5.525000000000000000e+01
3.100000000000000000e+01 8.097846153846154493e+02 4.297574157714843750e+02 -6.237854003906250000e+00 7.166505455970764160e-01 0.000000000000000000e+00 1.180676147460937500e+03 7.030095458030700684e-01 3.000000000000000000e+00 5.427692871093750000e+02 -6.925000000000000000e+01 5.525000000000000000e+01
1.200000000000000000e+01 8.065000000000001137e+02 4.331910705566406250e+02 -6.324310302734375000e+00 6.717769503593444824e-01 0.000000000000000000e+00 1.167330078125000000e+03 1.190155267715454102e+00 2.000000000000000000e+00 5.353725585937500000e+02 -6.875000000000000000e+01 5.525000000000000000e+01
6.000000000000000000e+00 7.990692307692305576e+02 4.356381835937500000e+02 -6.410766601562500000e+00 5.784978270530700684e-01 0.000000000000000000e+00 1.153984008789062500e+03 1.195776820182800293e+00 1.000000000000000000e+00 4.537858886718750000e+02 -6.825000000000000000e+01 5.525000000000000000e+01
1.500000000000000000e+01 8.147769230769227988e+02 4.371685180664062500e+02 -6.497253417968750000e+00 6.352759599685668945e-01 0.000000000000000000e+00 1.140637939453125000e+03 1.032372713088989258e+00 2.000000000000000000e+00 4.776534118652343750e+02 -6.775000000000000000e+01 5.525000000000000000e+01
2.900000000000000000e+01 8.045307692307692378e+02 4.389049072265625000e+02 -6.553741455078125000e+00 6.089673042297363281e-01 0.000000000000000000e+00 1.130844604492187500e+03 1.192225098609924316e+00 3.000000000000000000e+00 4.953437805175781250e+02 -6.725000000000000000e+01 5.525000000000000000e+01
2.100000000000000000e+01 7.958615384615387711e+02 4.417765808105468750e+02 -6.580261230468750000e+00 6.617713570594787598e-01 0.000000000000000000e+00 1.124603881835937500e+03 6.415815949440002441e-01 3.000000000000000000e+00 5.581866455078125000e+02 -6.675000000000000000e+01 5.525000000000000000e+01
8.000000000000000000e+00 7.920692307692308987e+02 4.438839111328125000e+02 -6.606781005859375000e+00 7.247003316879272461e-01 0.000000000000000000e+00 1.118363281250000000e+03 1.152827382087707520e+00 1.000000000000000000e+00 6.519368286132812500e+02 -6.625000000000000000e+01 5.525000000000000000e+01
5.000000000000000000e+00 7.846153846153846416e+02 4.423854675292968750e+02 -6.633331298828125000e+00 6.345753669738769531e-01 0.000000000000000000e+00 1.112122558593750000e+03 8.326793909072875977e-01 1.000000000000000000e+00 5.601179199218750000e+02 -6.575000000000000000e+01 5.525000000000000000e+01
1.700000000000000000e+01 7.895923076923074859e+02 4.381982116699218750e+02 -6.549255371093750000e+00 5.726712346076965332e-01 0.000000000000000000e+00 1.108539184570312500e+03 6.371788978576660156e-01 2.000000000000000000e+00 4.421655578613281250e+02 -6.525000000000000000e+01 5.525000000000000000e+01
1.100000000000000000e+01 7.968153846153848008e+02 4.326024169921875000e+02 -6.428314208984375000e+00 6.217784285545349121e-01 0.000000000000000000e+00 1.105841430664062500e+03 1.124921202659606934e+00 2.000000000000000000e+00 4.987153015136718750e+02 -6.475000000000000000e+01 5.525000000000000000e+01
1.800000000000000000e+01 7.952076923076923549e+02 4.146365661621093750e+02 -6.186462402343750000e+00 6.387908458709716797e-01 0.000000000000000000e+00 1.100446044921875000e+03 1.124638557434082031e+00 2.000000000000000000e+00 5.170726928710937500e+02 -6.375000000000000000e+01 5.525000000000000000e+01
6.000000000000000000e+00 8.149153846153848235e+02 4.133562622070312500e+02 -5.311981201171875000e+00 7.219710946083068848e-01 0.000000000000000000e+00 1.158735961914062500e+03 9.731848239898681641e-01 1.000000000000000000e+00 6.268753051757812500e+02 -6.275000000000000000e+01 5.525000000000000000e+01
4.000000000000000000e+00 8.542538461538465526e+02 4.189719543457031250e+02 -4.874755859375000000e+00 5.667232871055603027e-01 0.000000000000000000e+00 1.187880981445312500e+03 1.027027368545532227e+00 1.000000000000000000e+00 5.823677368164062500e+02 -6.225000000000000000e+01 5.525000000000000000e+01
5.200000000000000000e+01 5.042692307692306031e+02 2.802334899902343750e+02 -4.235992431640625000e+00 1.982166618108749390e-01 0.000000000000000000e+00 1.908722778320312500e+03 1.875838041305541992e+00 4.000000000000000000e+00 2.640777282714843750e+02 -9.925000000000000000e+01 5.575000000000000000e+01
5.800000000000000000e+01 5.454461538461539476e+02 2.832987976074218750e+02 -4.649108886718750000e+00 2.723141610622406006e-01 0.000000000000000000e+00 1.866862060546875000e+03 1.838737249374389648e+00 4.000000000000000000e+00 2.645237426757812500e+02 -9.825000000000000000e+01 5.575000000000000000e+01
2.500000000000000000e+01 5.746615384615383846e+02 2.817546997070312500e+02 -5.460327148437500000e+00 3.432649970054626465e-01 0.000000000000000000e+00 1.761885498046875000e+03 1.813308715820312500e+00 3.000000000000000000e+00 1.816446075439453125e+02 -9.525000000000000000e+01 5.575000000000000000e+01
2.400000000000000000e+01 5.885692307692305576e+02 2.857404174804687500e+02 -5.348876953125000000e+00 3.798255920410156250e-01 0.000000000000000000e+00 1.720522705078125000e+03 1.782480478286743164e+00 3.000000000000000000e+00 1.376401519775390625e+02 -9.375000000000000000e+01 5.575000000000000000e+01
2.300000000000000000e+01 5.676384615384615699e+02 2.314755096435546875e+02 -4.946105957031250000e+00 4.193802475929260254e-01 0.000000000000000000e+00 1.641493164062500000e+03 1.744224548339843750e+00 3.000000000000000000e+00 1.323394165039062500e+02 -9.125000000000000000e+01 5.575000000000000000e+01
1.800000000000000000e+01 5.794923076923076906e+02 2.095649871826171875e+02 -4.914581298828125000e+00 4.518175125122070312e-01 0.000000000000000000e+00 1.618587646484375000e+03 1.614781618118286133e+00 2.000000000000000000e+00 1.411889038085937500e+02 -9.075000000000000000e+01 5.575000000000000000e+01
1.500000000000000000e+01 6.716307692307690331e+02 3.728665161132812500e+02 -6.043762207031250000e+00 6.570994257926940918e-01 0.000000000000000000e+00 9.911162109375000000e+02 9.827100038528442383e-01 2.000000000000000000e+00 2.409067993164062500e+02 -7.675000000000000000e+01 5.575000000000000000e+01
1.600000000000000000e+01 6.828846153846156994e+02 3.714487609863281250e+02 -6.051788330078125000e+00 6.646087169647216797e-01 0.000000000000000000e+00 1.069111694335937500e+03 5.691452026367187500e-01 2.000000000000000000e+00 2.472135620117187500e+02 -7.625000000000000000e+01 5.575000000000000000e+01
1.700000000000000000e+01 6.784230769230769056e+02 3.686639709472656250e+02 -6.110595703125000000e+00 6.061784029006958008e-01 0.000000000000000000e+00 1.261623168945312500e+03 1.166617631912231445e+00 2.000000000000000000e+00 2.924616699218750000e+02 -7.475000000000000000e+01 5.575000000000000000e+01
2.000000000000000000e+01 6.920076923076921958e+02 3.671463317871093750e+02 -6.188079833984375000e+00 6.534813642501831055e-01 0.000000000000000000e+00 1.256668579101562500e+03 1.166630506515502930e+00 3.000000000000000000e+00 3.133516845703125000e+02 -7.425000000000000000e+01 5.575000000000000000e+01
1.700000000000000000e+01 7.000923076923075996e+02 3.658659057617187500e+02 -6.265594482421875000e+00 6.491055488586425781e-01 0.000000000000000000e+00 1.251713989257812500e+03 1.080992102622985840e+00 2.000000000000000000e+00 3.619580688476562500e+02 -7.375000000000000000e+01 5.575000000000000000e+01
7.000000000000000000e+00 7.148076923076921503e+02 3.685538635253906250e+02 -6.373107910156250000e+00 6.094406843185424805e-01 0.000000000000000000e+00 1.227287963867187500e+03 9.961355924606323242e-01 1.000000000000000000e+00 3.950920715332031250e+02 -7.225000000000000000e+01 5.575000000000000000e+01
1.200000000000000000e+01 7.266615384615383846e+02 3.748904418945312500e+02 -6.379180908203125000e+00 6.540311574935913086e-01 0.000000000000000000e+00 1.216869262695312500e+03 1.146973133087158203e+00 2.000000000000000000e+00 4.654452209472656250e+02 -7.175000000000000000e+01 5.575000000000000000e+01
1.800000000000000000e+01 7.355384615384617746e+02 3.845582885742187500e+02 -6.385253906250000000e+00 6.152860522270202637e-01 0.000000000000000000e+00 1.206450439453125000e+03 1.174466609954833984e+00 2.000000000000000000e+00 3.588356323242187500e+02 -7.125000000000000000e+01 5.575000000000000000e+01
2.900000000000000000e+01 7.452461538461537884e+02 3.956195983886718750e+02 -6.419738769531250000e+00 6.411750912666320801e-01 0.000000000000000000e+00 1.193302734375000000e+03 1.176997065544128418e+00 3.000000000000000000e+00 4.187828369140625000e+02 -7.075000000000000000e+01 5.575000000000000000e+01
2.400000000000000000e+01 7.522384615384611379e+02 4.054864501953125000e+02 -6.454223632812500000e+00 6.781827807426452637e-01 0.000000000000000000e+00 1.180155029296875000e+03 1.165372967720031738e+00 3.000000000000000000e+00 5.070025329589843750e+02 -7.025000000000000000e+01 5.575000000000000000e+01
1.400000000000000000e+01 7.811923076923077360e+02 4.152911376953125000e+02 -6.488708496093750000e+00 6.816155910491943359e-01 0.000000000000000000e+00 1.167007324218750000e+03 1.137099862098693848e+00 2.000000000000000000e+00 4.309963073730468750e+02 -6.975000000000000000e+01 5.575000000000000000e+01
1.000000000000000000e+01 7.909999999999998863e+02 4.212511596679687500e+02 -6.531219482421875000e+00 6.929040551185607910e-01 0.000000000000000000e+00 1.153738037109375000e+03 1.120547175407409668e+00 2.000000000000000000e+00 4.286069030761718750e+02 -6.925000000000000000e+01 5.575000000000000000e+01
6.000000000000000000e+00 7.725000000000000000e+02 4.248054199218750000e+02 -6.597839355468750000e+00 6.067835688591003418e-01 0.000000000000000000e+00 1.140103881835937500e+03 1.173606395721435547e+00 1.000000000000000000e+00 3.338833312988281250e+02 -6.875000000000000000e+01 5.575000000000000000e+01
4.000000000000000000e+00 7.832153846153845507e+02 4.374715881347656250e+02 -6.758331298828125000e+00 6.968601942062377930e-01 0.000000000000000000e+00 1.102220947265625000e+03 1.103048205375671387e+00 1.000000000000000000e+00 4.832873840332031250e+02 -6.725000000000000000e+01 5.575000000000000000e+01
2.100000000000000000e+01 7.738384615384615017e+02 4.402812194824218750e+02 -6.746307373046875000e+00 6.849215030670166016e-01 0.000000000000000000e+00 1.094625366210937500e+03 5.836147665977478027e-01 3.000000000000000000e+00 4.476566467285156250e+02 -6.675000000000000000e+01 5.575000000000000000e+01
1.100000000000000000e+01 7.712846153846155630e+02 4.417483825683593750e+02 -6.734252929687500000e+00 6.983172893524169922e-01 0.000000000000000000e+00 1.087029785156250000e+03 5.805696845054626465e-01 2.000000000000000000e+00 4.868324584960937500e+02 -6.625000000000000000e+01 5.575000000000000000e+01
1.300000000000000000e+01 7.662615384615384073e+02 4.397505798339843750e+02 -6.612243652343750000e+00 7.290889024734497070e-01 0.000000000000000000e+00 1.071472534179687500e+03 5.872058272361755371e-01 2.000000000000000000e+00 5.873918457031250000e+02 -6.525000000000000000e+01 5.575000000000000000e+01
7.000000000000000000e+00 7.713692307692308532e+02 4.386830139160156250e+02 -6.469635009765625000e+00 7.013118267059326172e-01 0.000000000000000000e+00 1.063388671875000000e+03 1.048797011375427246e+00 1.000000000000000000e+00 4.812661132812500000e+02 -6.475000000000000000e+01 5.575000000000000000e+01
1.200000000000000000e+01 7.736999999999997044e+02 4.321880493164062500e+02 -6.327026367187500000e+00 6.034355163574218750e-01 0.000000000000000000e+00 1.055304931640625000e+03 1.111796379089355469e+00 2.000000000000000000e+00 4.132424316406250000e+02 -6.425000000000000000e+01 5.575000000000000000e+01
1.200000000000000000e+01 7.791076923076927869e+02 4.299598083496093750e+02 -6.184387207031250000e+00 6.591221690177917480e-01 0.000000000000000000e+00 1.047221069335937500e+03 9.796922802925109863e-01 2.000000000000000000e+00 5.313784790039062500e+02 -6.375000000000000000e+01 5.575000000000000000e+01
3.000000000000000000e+01 7.774307692307689877e+02 4.321679077148437500e+02 -5.695678710937500000e+00 6.732529401779174805e-01 0.000000000000000000e+00 1.081588134765625000e+03 5.343609452247619629e-01 3.000000000000000000e+00 5.059622802734375000e+02 -6.325000000000000000e+01 5.575000000000000000e+01
3.500000000000000000e+01 8.697769230769229125e+02 4.344666442871093750e+02 -3.935455322265625000e+00 3.982658386230468750e-01 0.000000000000000000e+00 1.080023803710937500e+03 1.127669215202331543e+00 3.000000000000000000e+00 2.247713623046875000e+02 -6.125000000000000000e+01 5.575000000000000000e+01
3.800000000000000000e+01 4.912230769230770306e+02 2.794677124023437500e+02 -4.759826660156250000e+00 2.819713950157165527e-01 0.000000000000000000e+00 1.821118408203125000e+03 1.855760097503662109e+00 3.000000000000000000e+00 2.880841979980468750e+02 -9.975000000000000000e+01 5.625000000000000000e+01
4.300000000000000000e+01 5.349076923076922867e+02 2.852794494628906250e+02 -5.325286865234375000e+00 3.407414555549621582e-01 0.000000000000000000e+00 1.768313598632812500e+03 1.790428996086120605e+00 3.000000000000000000e+00 2.699998779296875000e+02 -9.825000000000000000e+01 5.625000000000000000e+01
2.300000000000000000e+01 5.703153846153846871e+02 2.806643066406250000e+02 -5.921508789062500000e+00 4.548185169696807861e-01 0.000000000000000000e+00 1.667010742187500000e+03 1.736157298088073730e+00 3.000000000000000000e+00 1.569449920654296875e+02 -9.475000000000000000e+01 5.625000000000000000e+01
2.000000000000000000e+01 5.691307692307690331e+02 2.831808166503906250e+02 -5.763885498046875000e+00 4.447320699691772461e-01 0.000000000000000000e+00 1.647631835937500000e+03 1.733047604560852051e+00 3.000000000000000000e+00 9.739437103271484375e+01 -9.375000000000000000e+01 5.625000000000000000e+01
2.100000000000000000e+01 5.584461538461538339e+02 2.684710998535156250e+02 -5.300537109375000000e+00 5.040379166603088379e-01 0.000000000000000000e+00 1.579067260742187500e+03 1.463148474693298340e+00 3.000000000000000000e+00 1.336609954833984375e+02 -9.175000000000000000e+01 5.625000000000000000e+01
2.400000000000000000e+01 5.616384615384615699e+02 2.395787200927734375e+02 -5.199676513671875000e+00 5.664390325546264648e-01 0.000000000000000000e+00 1.532107055664062500e+03 1.368508219718933105e+00 3.000000000000000000e+00 1.720549316406250000e+02 -9.075000000000000000e+01 5.625000000000000000e+01
1.500000000000000000e+01 5.304615384615384528e+02 2.088024597167968750e+02 -5.114440917968750000e+00 5.365428328514099121e-01 0.000000000000000000e+00 1.372073730468750000e+03 1.359530806541442871e+00 2.000000000000000000e+00 2.433452224731445312e+01 -8.825000000000000000e+01 5.625000000000000000e+01
1.800000000000000000e+01 6.676307692307692605e+02 3.674389648437500000e+02 -6.364440917968750000e+00 7.278376221656799316e-01 0.000000000000000000e+00 1.062487915039062500e+03 1.115779638290405273e+00 2.000000000000000000e+00 2.588358459472656250e+02 -7.575000000000000000e+01 5.625000000000000000e+01
1.600000000000000000e+01 6.814846153846151537e+02 3.657360839843750000e+02 -6.321472167968750000e+00 7.170045375823974609e-01 0.000000000000000000e+00 1.166983398437500000e+03 1.103313565254211426e+00 2.000000000000000000e+00 2.694122619628906250e+02 -7.525000000000000000e+01 5.625000000000000000e+01
1.500000000000000000e+01 6.872615384615382936e+02 3.659311828613281250e+02 -6.504516601562500000e+00 7.458711266517639160e-01 0.000000000000000000e+00 1.214711547851562500e+03 9.311547279357910156e-01 2.000000000000000000e+00 3.607840576171875000e+02 -7.375000000000000000e+01 5.625000000000000000e+01
2.000000000000000000e+00 6.930153846153843915e+02 3.660287170410156250e+02 -6.586334228515625000e+00 7.014737725257873535e-01 0.000000000000000000e+00 1.212903686523437500e+03 9.859660863876342773e-01 1.000000000000000000e+00 3.521074218750000000e+02 -7.325000000000000000e+01 5.625000000000000000e+01
1.100000000000000000e+01 6.947769230769229125e+02 3.637146301269531250e+02 -6.620056152343750000e+00 6.781230568885803223e-01 0.000000000000000000e+00 1.205407958984375000e+03 8.804175853729248047e-01 2.000000000000000000e+00 3.531479187011718750e+02 -7.275000000000000000e+01 5.625000000000000000e+01
1.400000000000000000e+01 6.968384615384619565e+02 3.605547180175781250e+02 -6.637756347656250000e+00 7.320029735565185547e-01 0.000000000000000000e+00 1.196016113281250000e+03 1.002319216728210449e+00 2.000000000000000000e+00 4.143096923828125000e+02 -7.225000000000000000e+01 5.625000000000000000e+01
1.100000000000000000e+01 6.973307692307691923e+02 3.637463378906250000e+02 -6.655456542968750000e+00 7.050255537033081055e-01 0.000000000000000000e+00 1.186624267578125000e+03 1.130012750625610352e+00 2.000000000000000000e+00 3.963080139160156250e+02 -7.175000000000000000e+01 5.625000000000000000e+01
1.300000000000000000e+01 7.213846153846154721e+02 3.792112121582031250e+02 -6.707916259765625000e+00 6.877024769783020020e-01 0.000000000000000000e+00 1.164362304687500000e+03 6.368224024772644043e-01 2.000000000000000000e+00 3.717596130371093750e+02 -7.075000000000000000e+01 5.625000000000000000e+01
2.500000000000000000e+01 7.328923076923076678e+02 3.877324218750000000e+02 -6.742706298828125000e+00 7.011829018592834473e-01 0.000000000000000000e+00 1.151492065429687500e+03 1.018613457679748535e+00 3.000000000000000000e+00 4.016611328125000000e+02 -7.025000000000000000e+01 5.625000000000000000e+01
2.100000000000000000e+01 7.359230769230772466e+02 3.925539855957031250e+02 -6.777496337890625000e+00 6.969789862632751465e-01 0.000000000000000000e+00 1.138621948242187500e+03 1.130623936653137207e+00 3.000000000000000000e+00 4.116336059570312500e+02 -6.975000000000000000e+01 5.625000000000000000e+01
3.200000000000000000e+01 7.333923076923073268e+02 3.996293334960937500e+02 -6.814910888671875000e+00 6.173734664916992188e-01 0.000000000000000000e+00 1.125488769531250000e+03 5.915339589118957520e-01 3.000000000000000000e+00 3.098997192382812500e+02 -6.925000000000000000e+01 5.625000000000000000e+01
1.200000000000000000e+01 7.171384615384612289e+02 4.042235717773437500e+02 -6.860137939453125000e+00 5.529758930206298828e-01 0.000000000000000000e+00 1.111566650390625000e+03 8.917701840400695801e-01 2.000000000000000000e+00 2.336625671386718750e+02 -6.875000000000000000e+01 5.625000000000000000e+01
1.600000000000000000e+01 7.371846153846156540e+02 4.093465576171875000e+02 -6.905395507812500000e+00 6.019433736801147461e-01 0.000000000000000000e+00 1.097644653320312500e+03 7.880217432975769043e-01 2.000000000000000000e+00 2.925050964355468750e+02 -6.825000000000000000e+01 5.625000000000000000e+01
5.000000000000000000e+00 7.556923076923072813e+02 4.209620056152343750e+02 -6.949218750000000000e+00 6.812629103660583496e-01 0.000000000000000000e+00 1.072123046875000000e+03 5.766018629074096680e-01 1.000000000000000000e+00 3.785983581542968750e+02 -6.725000000000000000e+01 5.625000000000000000e+01
7.000000000000000000e+00 7.530923076923075996e+02 4.316488342285156250e+02 -6.853118896484375000e+00 6.499283313751220703e-01 0.000000000000000000e+00 1.053569091796875000e+03 5.723278522491455078e-01 1.000000000000000000e+00 3.762397766113281250e+02 -6.625000000000000000e+01 5.625000000000000000e+01
2.700000000000000000e+01 7.607230769230770875e+02 4.353562011718750000e+02 -6.805053710937500000e+00 6.592270135879516602e-01 0.000000000000000000e+00 1.044291992187500000e+03 5.651040673255920410e-01 3.000000000000000000e+00 4.277881164550781250e+02 -6.575000000000000000e+01 5.625000000000000000e+01
3.000000000000000000e+00 7.596692307692306940e+02 4.376132812500000000e+02 -6.672485351562500000e+00 6.958299875259399414e-01 0.000000000000000000e+00 1.031967407226562500e+03 9.927079677581787109e-01 1.000000000000000000e+00 4.784231262207031250e+02 -6.525000000000000000e+01 5.625000000000000000e+01
6.000000000000000000e+00 7.609538461538463707e+02 4.371426391601562500e+02 -6.511718750000000000e+00 5.773841142654418945e-01 0.000000000000000000e+00 1.018626831054687500e+03 1.102475166320800781e+00 1.000000000000000000e+00 3.786418151855468750e+02 -6.475000000000000000e+01 5.625000000000000000e+01
1.100000000000000000e+01 7.745307692307694651e+02 4.420160217285156250e+02 -6.190216064453125000e+00 6.701493263244628906e-01 0.000000000000000000e+00 9.919456787109375000e+02 1.068192958831787109e+00 2.000000000000000000e+00 4.638409729003906250e+02 -6.375000000000000000e+01 5.625000000000000000e+01
8.000000000000000000e+00 7.848923076923080089e+02 4.486506958007812500e+02 -5.665771484375000000e+00 6.715139746665954590e-01 0.000000000000000000e+00 1.027538085937500000e+03 7.665302753448486328e-01 1.000000000000000000e+00 4.764702148437500000e+02 -6.325000000000000000e+01 5.625000000000000000e+01
7.000000000000000000e+00 8.109076923076925141e+02 4.548049926757812500e+02 -5.141326904296875000e+00 6.139407753944396973e-01 0.000000000000000000e+00 1.063130371093750000e+03 5.292410254478454590e-01 1.000000000000000000e+00 4.262676086425781250e+02 -6.275000000000000000e+01 5.625000000000000000e+01
2.400000000000000000e+01 5.572615384615385210e+02 2.840607604980468750e+02 -6.317962646484375000e+00 5.341982245445251465e-01 0.000000000000000000e+00 1.609537231445312500e+03 1.670529961585998535e+00 3.000000000000000000e+00 1.891998138427734375e+02 -9.575000000000000000e+01 5.675000000000000000e+01
1.100000000000000000e+01 5.451538461538459615e+02 2.894877014160156250e+02 -5.899078369140625000e+00 5.172680020332336426e-01 0.000000000000000000e+00 1.473778320312500000e+03 1.447736501693725586e+00 2.000000000000000000e+00 4.098532867431640625e+01 -9.275000000000000000e+01 5.675000000000000000e+01
2.100000000000000000e+01 5.397615384615385210e+02 2.775720520019531250e+02 -5.756988525390625000e+00 5.877842903137207031e-01 0.000000000000000000e+00 1.365319213867187500e+03 1.333686709403991699e+00 3.000000000000000000e+00 7.771306610107421875e+01 -9.125000000000000000e+01 5.675000000000000000e+01
1.400000000000000000e+01 5.215153846153846189e+02 2.280070495605468750e+02 -5.685180664062500000e+00 5.874552130699157715e-01 0.000000000000000000e+00 1.267146972656250000e+03 1.336747884750366211e+00 2.000000000000000000e+00 2.017998313903808594e+01 -8.925000000000000000e+01 5.675000000000000000e+01
8.000000000000000000e+00 6.698692307692306258e+02 3.631702270507812500e+02 -6.606933593750000000e+00 7.254871726036071777e-01 0.000000000000000000e+00 1.150906005859375000e+03 1.060116171836853027e+00 1.000000000000000000e+00 2.342508544921875000e+02 -7.525000000000000000e+01 5.675000000000000000e+01
8.000000000000000000e+00 6.737153846153845507e+02 3.634250793457031250e+02 -6.656066894531250000e+00 7.464213371276855469e-01 0.000000000000000000e+00 1.189292114257812500e+03 1.041847467422485352e+00 1.000000000000000000e+00 2.855773925781250000e+02 -7.475000000000000000e+01 5.675000000000000000e+01
1.000000000000000000e+00 6.746769230769230035e+02 3.615060119628906250e+02 -6.748474121093750000e+00 7.327197194099426270e-01 0.000000000000000000e+00 1.187412963867187500e+03 1.064667701721191406e+00 1.000000000000000000e+00 2.551935424804687500e+02 -7.425000000000000000e+01 5.675000000000000000e+01
1.200000000000000000e+01 6.770692307692307850e+02 3.621845703125000000e+02 -6.933288574218750000e+00 7.670791149139404297e-01 0.000000000000000000e+00 1.183654663085937500e+03 8.442507386207580566e-01 2.000000000000000000e+00 2.921921997070312500e+02 -7.325000000000000000e+01 5.675000000000000000e+01
1.000000000000000000e+01 6.766615384615383846e+02 3.548786621093750000e+02 -6.963073730468750000e+00 7.565465569496154785e-01 0.000000000000000000e+00 1.175222412109375000e+03 1.097782850265502930e+00 2.000000000000000000e+00 3.641505737304687500e+02 -7.275000000000000000e+01 5.675000000000000000e+01
7.000000000000000000e+00 6.815076923076926505e+02 3.471399841308593750e+02 -6.971984863281250000e+00 7.188422679901123047e-01 0.000000000000000000e+00 1.164605712890625000e+03 1.107300043106079102e+00 1.000000000000000000e+00 3.121589660644531250e+02 -7.225000000000000000e+01 5.675000000000000000e+01
5.000000000000000000e+00 6.845307692307692378e+02 3.499923706054687500e+02 -6.980865478515625000e+00 7.280195951461791992e-01 0.000000000000000000e+00 1.153989135742187500e+03 8.457139730453491211e-01 1.000000000000000000e+00 3.543861083984375000e+02 -7.175000000000000000e+01 5.675000000000000000e+01
1.600000000000000000e+01 6.956615384615386120e+02 3.575269470214843750e+02 -6.989776611328125000e+00 6.938484311103820801e-01 0.000000000000000000e+00 1.143372558593750000e+03 6.701660156250000000e-01 2.000000000000000000e+00 2.865787048339843750e+02 -7.125000000000000000e+01 5.675000000000000000e+01
9.000000000000000000e+00 7.069846153846153811e+02 3.648677673339843750e+02 -6.999237060546875000e+00 7.366341352462768555e-01 0.000000000000000000e+00 1.129487182617187500e+03 5.744932293891906738e-01 1.000000000000000000e+00 3.609033203125000000e+02 -7.075000000000000000e+01 5.675000000000000000e+01
3.000000000000000000e+00 7.085923076923073722e+02 3.716714477539062500e+02 -7.008697509765625000e+00 7.611307501792907715e-01 0.000000000000000000e+00 1.115601806640625000e+03 1.065947890281677246e+00 1.000000000000000000e+00 3.885753173828125000e+02 -7.025000000000000000e+01 5.675000000000000000e+01
5.000000000000000000e+00 7.018923076923075541e+02 3.818541564941406250e+02 -7.028472900390625000e+00 7.085844278335571289e-01 0.000000000000000000e+00 1.087750000000000000e+03 5.785718560218811035e-01 1.000000000000000000e+00 3.162921142578125000e+02 -6.925000000000000000e+01 5.675000000000000000e+01
3.600000000000000000e+01 7.041923076923077360e+02 3.849258422851562500e+02 -7.041412353515625000e+00 7.262680530548095703e-01 0.000000000000000000e+00 1.073540649414062500e+03 5.841964483261108398e-01 3.000000000000000000e+00 2.173418426513671875e+02 -6.875000000000000000e+01 5.675000000000000000e+01
1.800000000000000000e+01 7.156384615384619110e+02 3.871746215820312500e+02 -7.054351806640625000e+00 6.287548542022705078e-01 0.000000000000000000e+00 1.059331420898437500e+03 5.856104493141174316e-01 2.000000000000000000e+00 2.158920898437500000e+02 -6.825000000000000000e+01 5.675000000000000000e+01
2.000000000000000000e+01 7.163846153846154721e+02 3.895226440429687500e+02 -7.067291259765625000e+00 6.452643871307373047e-01 0.000000000000000000e+00 1.045122070312500000e+03 5.832008123397827148e-01 3.000000000000000000e+00 2.649891052246093750e+02 -6.775000000000000000e+01 5.675000000000000000e+01
7.000000000000000000e+00 7.210076923076924231e+02 3.920629272460937500e+02 -7.040985107421875000e+00 6.390936970710754395e-01 0.000000000000000000e+00 1.031356323242187500e+03 7.012023329734802246e-01 1.000000000000000000e+00 2.868538818359375000e+02 -6.725000000000000000e+01 5.675000000000000000e+01
4.000000000000000000e+00 7.317615384615381799e+02 3.955793151855468750e+02 -6.975402832031250000e+00 6.932470202445983887e-01 0.000000000000000000e+00 1.018034179687500000e+03 7.833921313285827637e-01 1.000000000000000000e+00 3.203096923828125000e+02 -6.675000000000000000e+01 5.675000000000000000e+01
2.000000000000000000e+00 7.540999999999999091e+02 3.964099731445312500e+02 -6.712921142578125000e+00 7.844581604003906250e-01 0.000000000000000000e+00 9.748137207031250000e+02 5.351551771163940430e-01 1.000000000000000000e+00 4.669546203613281250e+02 -6.525000000000000000e+01 5.675000000000000000e+01
1.100000000000000000e+01 7.538076923076920366e+02 3.971119384765625000e+02 -6.559600830078125000e+00 7.325596213340759277e-01 0.000000000000000000e+00 9.571528320312500000e+02 1.054559230804443359e+00 2.000000000000000000e+00 4.474161071777343750e+02 -6.475000000000000000e+01 5.675000000000000000e+01
8.000000000000000000e+00 7.877307692307692832e+02 4.164778442382812500e+02 -6.252990722656250000e+00 7.977793812751770020e-01 0.000000000000000000e+00 9.218309936523437500e+02 1.002539992332458496e+00 1.000000000000000000e+00 5.793900146484375000e+02 -6.375000000000000000e+01 5.675000000000000000e+01
2.000000000000000000e+00 7.948307692307693060e+02 4.260511474609375000e+02 -5.806671142578125000e+00 7.557671666145324707e-01 0.000000000000000000e+00 9.297231445312500000e+02 1.002912402153015137e+00 1.000000000000000000e+00 5.558328247070312500e+02 -6.325000000000000000e+01 5.675000000000000000e+01
9.000000000000000000e+00 8.544307692307691013e+02 4.504158630371093750e+02 -4.914062500000000000e+00 6.121228933334350586e-01 0.000000000000000000e+00 9.455074462890625000e+02 5.282434225082397461e-01 1.000000000000000000e+00 3.413147277832031250e+02 -6.225000000000000000e+01 5.675000000000000000e+01
1.500000000000000000e+01 5.502846153846153356e+02 2.968170471191406250e+02 -6.541259765625000000e+00 6.603593230247497559e-01 0.000000000000000000e+00 1.520688354492187500e+03 1.333189129829406738e+00 2.000000000000000000e+00 2.049047088623046875e+02 -9.525000000000000000e+01 5.725000000000000000e+01
2.200000000000000000e+01 5.483153846153845734e+02 3.019028015136718750e+02 -6.341979980468750000e+00 6.356334090232849121e-01 0.000000000000000000e+00 1.500272583007812500e+03 1.585100531578063965e+00 3.000000000000000000e+00 1.409266052246093750e+02 -9.425000000000000000e+01 5.725000000000000000e+01
1.100000000000000000e+01 6.350307692307692378e+02 3.611394958496093750e+02 -6.782989501953125000e+00 7.719287872314453125e-01 0.000000000000000000e+00 1.029213867187500000e+03 1.060988306999206543e+00 2.000000000000000000e+00 1.929889526367187500e+02 -7.625000000000000000e+01 5.725000000000000000e+01
2.700000000000000000e+01 6.436153846153845279e+02 3.604815063476562500e+02 -6.837707519531250000e+00 7.491223812103271484e-01 0.000000000000000000e+00 1.082021240234375000e+03 1.033354878425598145e+00 3.000000000000000000e+00 2.047686462402343750e+02 -7.575000000000000000e+01 5.725000000000000000e+01
1.100000000000000000e+01 6.588461538461540385e+02 3.566970214843750000e+02 -7.074249267578125000e+00 7.924783825874328613e-01 0.000000000000000000e+00 1.158306518554687500e+03 1.038232088088989258e+00 2.000000000000000000e+00 2.671781921386718750e+02 -7.425000000000000000e+01 5.725000000000000000e+01
5.000000000000000000e+00 6.650384615384617746e+02 3.576808776855468750e+02 -7.280242919921875000e+00 8.079916834831237793e-01 0.000000000000000000e+00 1.154405517578125000e+03 1.052275419235229492e+00 1.000000000000000000e+00 3.490818481445312500e+02 -7.325000000000000000e+01 5.725000000000000000e+01
2.000000000000000000e+00 6.695692307692307850e+02 3.513444213867187500e+02 -7.306060791015625000e+00 8.134462833404541016e-01 0.000000000000000000e+00 1.145036743164062500e+03 1.038924455642700195e+00 1.000000000000000000e+00 3.660199279785156250e+02 -7.275000000000000000e+01 5.725000000000000000e+01
1.300000000000000000e+01 6.719769230769234127e+02 3.463611145019531250e+02 -7.306182861328125000e+00 7.987613677978515625e-01 0.000000000000000000e+00 1.133195434570312500e+03 1.022112131118774414e+00 2.000000000000000000e+00 3.158491516113281250e+02 -7.225000000000000000e+01 5.725000000000000000e+01
1.200000000000000000e+01 6.808923076923075541e+02 3.456881103515625000e+02 -7.306304931640625000e+00 7.208861708641052246e-01 0.000000000000000000e+00 1.121354003906250000e+03 1.041190624237060547e+00 2.000000000000000000e+00 1.992164001464843750e+02 -7.175000000000000000e+01 5.725000000000000000e+01
3.000000000000000000e+00 6.799769230769232990e+02 3.515938720703125000e+02 -7.306427001953125000e+00 7.803732156753540039e-01 0.000000000000000000e+00 1.109512573242187500e+03 7.106392383575439453e-01 1.000000000000000000e+00 2.930547485351562500e+02 -7.125000000000000000e+01 5.725000000000000000e+01
3.000000000000000000e+00 6.913384615384619565e+02 3.569614562988281250e+02 -7.290527343750000000e+00 6.872360706329345703e-01 0.000000000000000000e+00 1.094612060546875000e+03 1.075183987617492676e+00 1.000000000000000000e+00 1.644705352783203125e+02 -7.075000000000000000e+01 5.725000000000000000e+01
1.000000000000000000e+01 6.802076923076924686e+02 3.644725646972656250e+02 -7.274658203125000000e+00 7.700463533401489258e-01 0.000000000000000000e+00 1.079711425781250000e+03 1.033385157585144043e+00 2.000000000000000000e+00 3.056560668945312500e+02 -7.025000000000000000e+01 5.725000000000000000e+01
2.400000000000000000e+01 6.708769230769231626e+02 3.682843322753906250e+02 -7.258758544921875000e+00 6.709390282630920410e-01 0.000000000000000000e+00 1.064810913085937500e+03 6.610438227653503418e-01 3.000000000000000000e+00 1.981813354492187500e+02 -6.975000000000000000e+01 5.725000000000000000e+01
2.400000000000000000e+01 6.789846153846150401e+02 3.711563720703125000e+02 -7.242004394531250000e+00 6.893543004989624023e-01 0.000000000000000000e+00 1.050011230468750000e+03 5.648152828216552734e-01 3.000000000000000000e+00 1.785205688476562500e+02 -6.925000000000000000e+01 5.725000000000000000e+01
4.000000000000000000e+00 6.870769230769229807e+02 3.732030334472656250e+02 -7.222656250000000000e+00 7.327512502670288086e-01 0.000000000000000000e+00 1.035514648437500000e+03 5.686643719673156738e-01 1.000000000000000000e+00 2.793961791992187500e+02 -6.875000000000000000e+01 5.725000000000000000e+01
6.000000000000000000e+00 6.841307692307696016e+02 3.746500244140625000e+02 -7.203277587890625000e+00 7.126655578613281250e-01 0.000000000000000000e+00 1.021018066406250000e+03 5.734046101570129395e-01 1.000000000000000000e+00 2.279540557861328125e+02 -6.825000000000000000e+01 5.725000000000000000e+01
9.000000000000000000e+00 6.939538461538460297e+02 3.754295654296875000e+02 -7.183929443359375000e+00 6.888419389724731445e-01 0.000000000000000000e+00 1.006521484375000000e+03 6.289473772048950195e-01 1.000000000000000000e+00 2.573923645019531250e+02 -6.775000000000000000e+01 5.725000000000000000e+01
3.500000000000000000e+01 6.928076923076922640e+02 3.753477478027343750e+02 -7.132720947265625000e+00 5.732933282852172852e-01 0.000000000000000000e+00 9.905895385742187500e+02 8.552296757698059082e-01 3.000000000000000000e+00 1.122589263916015625e+02 -6.725000000000000000e+01 5.725000000000000000e+01
1.500000000000000000e+01 7.080538461538459387e+02 3.734626159667968750e+02 -7.049652099609375000e+00 6.952767372131347656e-01 0.000000000000000000e+00 9.732223510742187500e+02 7.530553340911865234e-01 2.000000000000000000e+00 2.976293334960937500e+02 -6.675000000000000000e+01 5.725000000000000000e+01
3.000000000000000000e+00 7.163230769230769965e+02 3.688572387695312500e+02 -6.966583251953125000e+00 7.105990052223205566e-01 0.000000000000000000e+00 9.558551025390625000e+02 1.020755171775817871e+00 1.000000000000000000e+00 3.515057373046875000e+02 -6.625000000000000000e+01 5.725000000000000000e+01
4.100000000000000000e+01 7.440230769230767010e+02 3.127463378906250000e+02 -6.753326416015625000e+00 6.496169567108154297e-01 0.000000000000000000e+00 9.176600952148437500e+02 5.178115367889404297e-01 3.000000000000000000e+00 3.025739746093750000e+02 -6.525000000000000000e+01 5.725000000000000000e+01
7.000000000000000000e+00 7.701615384615387256e+02 2.883130187988281250e+02 -6.607482910156250000e+00 8.186136484146118164e-01 0.000000000000000000e+00 8.956788330078125000e+02 9.795003533363342285e-01 1.000000000000000000e+00 5.203536987304687500e+02 -6.475000000000000000e+01 5.725000000000000000e+01
4.000000000000000000e+00 7.801538461538463025e+02 2.962434692382812500e+02 -6.461608886718750000e+00 8.250176310539245605e-01 0.000000000000000000e+00 8.736975708007812500e+02 8.013057708740234375e-01 1.000000000000000000e+00 5.705335693359375000e+02 -6.425000000000000000e+01 5.725000000000000000e+01
1.000000000000000000e+01 8.349461538461539476e+02 3.793282775878906250e+02 -5.211273193359375000e+00 3.696346282958984375e-01 0.000000000000000000e+00 7.922921142578125000e+02 5.053638219833374023e-01 2.000000000000000000e+00 1.042281036376953125e+02 -6.225000000000000000e+01 5.725000000000000000e+01
1.200000000000000000e+01 5.193538461538462343e+02 3.257522277832031250e+02 -6.481536865234375000e+00 6.669861078262329102e-01 0.000000000000000000e+00 1.411281005859375000e+03 1.268245697021484375e+00 2.000000000000000000e+00 6.084837722778320312e+01 -9.375000000000000000e+01 5.775000000000000000e+01
1.500000000000000000e+01 5.093769230769231058e+02 3.260068969726562500e+02 -6.565887451171875000e+00 6.672417521476745605e-01 0.000000000000000000e+00 1.302113159179687500e+03 1.275824427604675293e+00 2.000000000000000000e+00 4.140675735473632812e+01 -9.325000000000000000e+01 5.775000000000000000e+01
1.900000000000000000e+01 6.094384615384614108e+02 3.607573547363281250e+02 -6.970764160156250000e+00 7.784930467605590820e-01 0.000000000000000000e+00 1.064824707031250000e+03 1.023762583732604980e+00 2.000000000000000000e+00 1.193331985473632812e+02 -7.625000000000000000e+01 5.775000000000000000e+01
1.800000000000000000e+01 6.187692307692303757e+02 3.587217407226562500e+02 -7.074340820312500000e+00 7.823342084884643555e-01 0.000000000000000000e+00 1.091787963867187500e+03 1.017473936080932617e+00 2.000000000000000000e+00 1.550246734619140625e+02 -7.575000000000000000e+01 5.775000000000000000e+01
1.000000000000000000e+00 6.344230769230772466e+02 3.560100402832031250e+02 -7.177886962890625000e+00 8.152818679809570312e-01 0.000000000000000000e+00 1.118751220703125000e+03 7.820108532905578613e-01 1.000000000000000000e+00 2.195699615478515625e+02 -7.525000000000000000e+01 5.775000000000000000e+01
2.000000000000000000e+00 6.548923076923076678e+02 3.515917968750000000e+02 -7.513610839843750000e+00 8.149925470352172852e-01 0.000000000000000000e+00 1.127178222656250000e+03 9.559279084205627441e-01 1.000000000000000000e+00 2.758464965820312500e+02 -7.375000000000000000e+01 5.775000000000000000e+01
1.000000000000000000e+00 6.515307692307692378e+02 3.521855773925781250e+02 -7.627197265625000000e+00 8.029609918594360352e-01 0.000000000000000000e+00 1.125156372070312500e+03 1.015902876853942871e+00 1.000000000000000000e+00 2.060795745849609375e+02 -7.325000000000000000e+01 5.775000000000000000e+01
1.000000000000000000e+00 6.521461538461539931e+02 3.470076904296875000e+02 -7.649078369140625000e+00 8.118355274200439453e-01 0.000000000000000000e+00 1.114851196289062500e+03 1.019946813583374023e+00 1.000000000000000000e+00 2.757777099609375000e+02 -7.275000000000000000e+01 5.775000000000000000e+01
2.000000000000000000e+00 6.561615384615386120e+02 3.429375915527343750e+02 -7.640411376953125000e+00 8.075142502784729004e-01 0.000000000000000000e+00 1.101785034179687500e+03 1.025767564773559570e+00 1.000000000000000000e+00 2.882894897460937500e+02 -7.225000000000000000e+01 5.775000000000000000e+01
2.000000000000000000e+00 6.634076923076919456e+02 3.553986511230468750e+02 -7.581848144531250000e+00 8.211951851844787598e-01 0.000000000000000000e+00 1.059736938476562500e+03 9.662100076675415039e-01 1.000000000000000000e+00 2.833488159179687500e+02 -7.075000000000000000e+01 5.775000000000000000e+01
5.000000000000000000e+00 6.456846153846150855e+02 3.597884521484375000e+02 -7.540618896484375000e+00 7.863923907279968262e-01 0.000000000000000000e+00 1.043821166992187500e+03 7.394947409629821777e-01 1.000000000000000000e+00 2.525316467285156250e+02 -7.025000000000000000e+01 5.775000000000000000e+01
1.000000000000000000e+01 6.422076923076922412e+02 3.641304626464843750e+02 -7.499389648437500000e+00 7.380760312080383301e-01 0.000000000000000000e+00 1.027905273437500000e+03 5.892959833145141602e-01 2.000000000000000000e+00 1.951700439453125000e+02 -6.975000000000000000e+01 5.775000000000000000e+01
2.900000000000000000e+01 6.517076923076919002e+02 3.681517944335937500e+02 -7.352233886718750000e+00 6.671760082244873047e-01 0.000000000000000000e+00 9.827047729492187500e+02 1.138647079467773438e+00 3.000000000000000000e+00 1.307790832519531250e+02 -6.825000000000000000e+01 5.775000000000000000e+01
3.000000000000000000e+00 6.672923076923078725e+02 3.689873046875000000e+02 -7.300567626953125000e+00 7.021793127059936523e-01 0.000000000000000000e+00 9.679208984375000000e+02 1.136288523674011230e+00 1.000000000000000000e+00 1.541508789062500000e+02 -6.775000000000000000e+01 5.775000000000000000e+01
1.500000000000000000e+01 6.892692307692310578e+02 3.638772583007812500e+02 -7.123870849609375000e+00 6.764634251594543457e-01 0.000000000000000000e+00 9.284104614257812500e+02 1.060919523239135742e+00 2.000000000000000000e+00 1.960795593261718750e+02 -6.675000000000000000e+01 5.775000000000000000e+01
2.600000000000000000e+01 7.006999999999999318e+02 3.486219177246093750e+02 -7.023284912109375000e+00 6.517741084098815918e-01 0.000000000000000000e+00 9.069981079101562500e+02 1.092450976371765137e+00 3.000000000000000000e+00 2.183026733398437500e+02 -6.625000000000000000e+01 5.775000000000000000e+01
7.000000000000000000e+00 7.208384615384612744e+02 3.150150451660156250e+02 -6.922698974609375000e+00 8.099564313888549805e-01 0.000000000000000000e+00 8.855858154296875000e+02 1.051777005195617676e+00 1.000000000000000000e+00 4.139905090332031250e+02 -6.575000000000000000e+01 5.775000000000000000e+01
6.000000000000000000e+00 7.733230769230768828e+02 2.160654602050781250e+02 -6.655364990234375000e+00 8.594260215759277344e-01 0.000000000000000000e+00 8.342048339843750000e+02 9.090786576271057129e-01 1.000000000000000000e+00 6.798215332031250000e+02 -6.475000000000000000e+01 5.775000000000000000e+01
2.000000000000000000e+00 7.940230769230768146e+02 2.023429412841796875e+02 -6.516937255859375000e+00 8.841282129287719727e-01 0.000000000000000000e+00 8.079031982421875000e+02 7.099615335464477539e-01 1.000000000000000000e+00 6.805135498046875000e+02 -6.425000000000000000e+01 5.775000000000000000e+01
5.000000000000000000e+00 8.004384615384614108e+02 2.060575561523437500e+02 -6.378540039062500000e+00 8.804435133934020996e-01 0.000000000000000000e+00 7.816015625000000000e+02 7.690528631210327148e-01 1.000000000000000000e+00 5.954909057617187500e+02 -6.375000000000000000e+01 5.775000000000000000e+01
9.000000000000000000e+00 8.014615384615383391e+02 2.135854644775390625e+02 -6.088500976562500000e+00 8.301753997802734375e-01 0.000000000000000000e+00 7.340933227539062500e+02 7.957164049148559570e-01 1.000000000000000000e+00 5.241501464843750000e+02 -6.325000000000000000e+01 5.775000000000000000e+01
7.000000000000000000e+00 8.027230769230766327e+02 2.237556762695312500e+02 -5.798492431640625000e+00 5.715137720108032227e-01 0.000000000000000000e+00 6.865850830078125000e+02 6.888399124145507812e-01 1.000000000000000000e+00 2.916907958984375000e+02 -6.275000000000000000e+01 5.775000000000000000e+01
2.200000000000000000e+01 4.365846153846152902e+02 3.018491516113281250e+02 -6.909820556640625000e+00 6.690508127212524414e-01 0.000000000000000000e+00 1.463132446289062500e+03 1.352169990539550781e+00 3.000000000000000000e+00 3.422698059082031250e+02 -9.975000000000000000e+01 5.825000000000000000e+01
2.800000000000000000e+01 4.398615384615384301e+02 2.956982421875000000e+02 -7.027984619140625000e+00 7.110682725906372070e-01 0.000000000000000000e+00 1.452522216796875000e+03 1.336229920387268066e+00 3.000000000000000000e+00 3.558095092773437500e+02 -9.925000000000000000e+01 5.825000000000000000e+01
2.200000000000000000e+01 4.527076923076922981e+02 3.051134948730468750e+02 -7.161621093750000000e+00 7.062148451805114746e-01 0.000000000000000000e+00 1.432407714843750000e+03 1.416138172149658203e+00 3.000000000000000000e+00 2.743670959472656250e+02 -9.825000000000000000e+01 5.825000000000000000e+01
1.900000000000000000e+01 4.836384615384614563e+02 3.258676452636718750e+02 -7.228851318359375000e+00 7.812466025352478027e-01 0.000000000000000000e+00 1.401610107421875000e+03 1.336615443229675293e+00 2.000000000000000000e+00 2.558912811279296875e+02 -9.675000000000000000e+01 5.825000000000000000e+01
1.700000000000000000e+01 4.883384615384615017e+02 3.294394226074218750e+02 -7.206817626953125000e+00 7.955338954925537109e-01 0.000000000000000000e+00 1.391135498046875000e+03 1.243093371391296387e+00 2.000000000000000000e+00 2.371748046875000000e+02 -9.625000000000000000e+01 5.825000000000000000e+01
1.400000000000000000e+01 4.940153846153843915e+02 3.346705627441406250e+02 -7.184814453125000000e+00 7.533912062644958496e-01 0.000000000000000000e+00 1.380660888671875000e+03 1.239164352416992188e+00 2.000000000000000000e+00 1.608556365966796875e+02 -9.575000000000000000e+01 5.825000000000000000e+01
1.100000000000000000e+01 5.003384615384615017e+02 3.439821777343750000e+02 -6.997344970703125000e+00 7.396224737167358398e-01 0.000000000000000000e+00 1.347971191406250000e+03 1.228657960891723633e+00 2.000000000000000000e+00 8.067201232910156250e+01 -9.475000000000000000e+01 5.825000000000000000e+01
1.100000000000000000e+01 4.979461538461537202e+02 3.464756774902343750e+02 -6.789398193359375000e+00 7.343179583549499512e-01 0.000000000000000000e+00 1.313604125976562500e+03 1.226297736167907715e+00 2.000000000000000000e+00 5.264616394042968750e+01 -9.375000000000000000e+01 5.825000000000000000e+01
1.300000000000000000e+01 5.803769230769231626e+02 3.624862365722656250e+02 -7.108489990234375000e+00 8.416341543197631836e-01 0.000000000000000000e+00 1.067582031250000000e+03 9.993839263916015625e-01 2.000000000000000000e+00 1.285092926025390625e+02 -7.675000000000000000e+01 5.825000000000000000e+01
1.400000000000000000e+01 5.981923076923079634e+02 3.618207397460937500e+02 -7.251220703125000000e+00 8.429519534111022949e-01 0.000000000000000000e+00 1.075756347656250000e+03 9.898654222488403320e-01 2.000000000000000000e+00 1.830498962402343750e+02 -7.625000000000000000e+01 5.825000000000000000e+01
1.000000000000000000e+00 6.190153846153846189e+02 3.545684204101562500e+02 -7.536651611328125000e+00 8.344597816467285156e-01 0.000000000000000000e+00 1.092104858398437500e+03 9.885360598564147949e-01 1.000000000000000000e+00 1.683203125000000000e+02 -7.525000000000000000e+01 5.825000000000000000e+01
9.000000000000000000e+00 6.283384615384613880e+02 3.503930358886718750e+02 -7.665985107421875000e+00 8.503240346908569336e-01 0.000000000000000000e+00 1.094892089843750000e+03 9.884228110313415527e-01 1.000000000000000000e+00 2.091840057373046875e+02 -7.475000000000000000e+01 5.825000000000000000e+01
2.000000000000000000e+00 6.379307692307692150e+02 3.468566284179687500e+02 -7.781921386718750000e+00 8.517006635665893555e-01 0.000000000000000000e+00 1.092291992187500000e+03 9.865288138389587402e-01 1.000000000000000000e+00 2.183224792480468750e+02 -7.425000000000000000e+01 5.825000000000000000e+01
3.000000000000000000e+00 6.364846153846154948e+02 3.459406738281250000e+02 -7.897857666015625000e+00 8.553360104560852051e-01 0.000000000000000000e+00 1.089692016601562500e+03 9.918560981750488281e-01 1.000000000000000000e+00 2.340933227539062500e+02 -7.375000000000000000e+01 5.825000000000000000e+01
4.000000000000000000e+00 6.378230769230765418e+02 3.451572570800781250e+02 -8.013793945312500000e+00 8.378705382347106934e-01 0.000000000000000000e+00 1.087092041015625000e+03 1.002239584922790527e+00 1.000000000000000000e+00 2.283166503906250000e+02 -7.325000000000000000e+01 5.825000000000000000e+01
2.000000000000000000e+00 6.293538461538463480e+02 3.332554626464843750e+02 -8.021606445312500000e+00 8.393393158912658691e-01 0.000000000000000000e+00 1.075923706054687500e+03 9.175959229469299316e-01 1.000000000000000000e+00 2.222808685302734375e+02 -7.275000000000000000e+01 5.825000000000000000e+01
2.000000000000000000e+00 6.342999999999998408e+02 3.293471374511718750e+02 -7.993316650390625000e+00 8.508619666099548340e-01 0.000000000000000000e+00 1.061899414062500000e+03 6.847196221351623535e-01 1.000000000000000000e+00 2.436670989990234375e+02 -7.225000000000000000e+01 5.825000000000000000e+01
8.000000000000000000e+00 6.348230769230771102e+02 3.309863586425781250e+02 -7.965057373046875000e+00 8.398922681808471680e-01 0.000000000000000000e+00 1.047875000000000000e+03 5.229907631874084473e-01 1.000000000000000000e+00 2.202840118408203125e+02 -7.175000000000000000e+01 5.825000000000000000e+01
4.000000000000000000e+00 6.359999999999998863e+02 3.376991882324218750e+02 -7.936798095703125000e+00 8.317531943321228027e-01 0.000000000000000000e+00 1.033850585937500000e+03 9.177876710891723633e-01 1.000000000000000000e+00 2.102079315185546875e+02 -7.125000000000000000e+01 5.825000000000000000e+01
7.000000000000000000e+00 6.358538461538460069e+02 3.440933227539062500e+02 -7.874176025390625000e+00 8.430687189102172852e-01 0.000000000000000000e+00 1.008744995117187500e+03 1.031439304351806641e+00 1.000000000000000000e+00 2.712677917480468750e+02 -7.075000000000000000e+01 5.825000000000000000e+01
9.000000000000000000e+00 6.244538461538462570e+02 3.508926696777343750e+02 -7.811584472656250000e+00 7.969705462455749512e-01 0.000000000000000000e+00 9.836394042968750000e+02 9.790941476821899414e-01 1.000000000000000000e+00 1.672048645019531250e+02 -7.025000000000000000e+01 5.825000000000000000e+01
6.000000000000000000e+00 6.264846153846153811e+02 3.597110595703125000e+02 -7.679840087890625000e+00 7.843855619430541992e-01 0.000000000000000000e+00 9.362366943359375000e+02 1.074969172477722168e+00 1.000000000000000000e+00 2.202781829833984375e+02 -6.925000000000000000e+01 5.825000000000000000e+01
2.000000000000000000e+00 6.171615384615383846e+02 3.620679321289062500e+02 -7.591217041015625000e+00 7.349168062210083008e-01 0.000000000000000000e+00 9.223649291992187500e+02 1.046243786811828613e+00 1.000000000000000000e+00 1.424410858154296875e+02 -6.875000000000000000e+01 5.825000000000000000e+01
8.000000000000000000e+00 7.065769230769232081e+02 2.903945007324218750e+02 -6.964721679687500000e+00 7.571965456008911133e-01 0.000000000000000000e+00 8.085963745117187500e+02 6.222917437553405762e-01 1.000000000000000000e+00 2.580671386718750000e+02 -6.575000000000000000e+01 5.825000000000000000e+01
6.000000000000000000e+00 7.825538461538458250e+02 1.912939910888671875e+02 -6.701416015625000000e+00 9.200986623764038086e-01 0.000000000000000000e+00 7.561495971679687500e+02 6.547117829322814941e-01 1.000000000000000000e+00 7.302781372070312500e+02 -6.475000000000000000e+01 5.825000000000000000e+01
1.000000000000000000e+00 7.933769230769232763e+02 1.501185455322265625e+02 -6.433502197265625000e+00 8.119012117385864258e-01 0.000000000000000000e+00 7.026667480468750000e+02 6.590232253074645996e-01 1.000000000000000000e+00 7.064328613281250000e+02 -6.375000000000000000e+01 5.825000000000000000e+01
1.000000000000000000e+01 7.795615384615381345e+02 1.426072540283203125e+02 -6.192077636718750000e+00 7.732964754104614258e-01 0.000000000000000000e+00 6.429718017578125000e+02 5.893237590789794922e-01 2.000000000000000000e+00 3.732927246093750000e+02 -6.325000000000000000e+01 5.825000000000000000e+01
1.800000000000000000e+01 4.334923076923076906e+02 3.287607421875000000e+02 -7.582916259765625000e+00 7.730506062507629395e-01 0.000000000000000000e+00 1.363415039062500000e+03 1.265640735626220703e+00 2.000000000000000000e+00 2.664277038574218750e+02 -9.825000000000000000e+01 5.875000000000000000e+01
1.600000000000000000e+01 4.589846153846153243e+02 3.468065490722656250e+02 -7.530273437500000000e+00 8.025409579277038574e-01 0.000000000000000000e+00 1.328607910156250000e+03 1.244909048080444336e+00 2.000000000000000000e+00 1.713022155761718750e+02 -9.625000000000000000e+01 5.875000000000000000e+01
1.000000000000000000e+01 4.634615384615386233e+02 3.498574218750000000e+02 -7.489440917968750000e+00 7.927920818328857422e-01 0.000000000000000000e+00 1.319540649414062500e+03 1.215701103210449219e+00 2.000000000000000000e+00 1.112412796020507812e+02 -9.575000000000000000e+01 5.875000000000000000e+01
1.200000000000000000e+01 4.679307692307692719e+02 3.529029541015625000e+02 -7.433044433593750000e+00 7.877133488655090332e-01 0.000000000000000000e+00 1.288679931640625000e+03 1.209077358245849609e+00 2.000000000000000000e+00 7.201416778564453125e+01 -9.525000000000000000e+01 5.875000000000000000e+01
8.000000000000000000e+00 5.228307692307688512e+02 3.619438476562500000e+02 -7.273712158203125000e+00 8.621365427970886230e-01 0.000000000000000000e+00 9.191732788085937500e+02 9.877595901489257812e-01 1.000000000000000000e+00 6.980851745605468750e+01 -7.775000000000000000e+01 5.875000000000000000e+01
7.000000000000000000e+00 5.837230769230769738e+02 3.513133544921875000e+02 -8.056915283203125000e+00 8.608537912368774414e-01 0.000000000000000000e+00 1.042174682617187500e+03 9.515888094902038574e-01 1.000000000000000000e+00 1.563141632080078125e+02 -7.525000000000000000e+01 5.875000000000000000e+01
4.000000000000000000e+00 5.888307692307691923e+02 3.447456665039062500e+02 -8.187286376953125000e+00 8.585017323493957520e-01 0.000000000000000000e+00 1.042491333007812500e+03 9.720791578292846680e-01 1.000000000000000000e+00 1.729338836669921875e+02 -7.475000000000000000e+01 5.875000000000000000e+01
1.000000000000000000e+00 5.994538461538458023e+02 3.315397644042968750e+02 -8.387634277343750000e+00 8.695172667503356934e-01 0.000000000000000000e+00 1.033902099609375000e+03 9.743518829345703125e-01 1.000000000000000000e+00 2.195033111572265625e+02 -7.375000000000000000e+01 5.875000000000000000e+01
2.000000000000000000e+00 5.986692307692308077e+02 3.180507202148437500e+02 -8.487823486328125000e+00 8.639644384384155273e-01 0.000000000000000000e+00 1.029607421875000000e+03 9.772980213165283203e-01 1.000000000000000000e+00 2.161501922607421875e+02 -7.325000000000000000e+01 5.875000000000000000e+01
4.000000000000000000e+00 5.930538461538462798e+02 3.019140930175781250e+02 -8.459106445312500000e+00 8.602637648582458496e-01 0.000000000000000000e+00 1.017737304687500000e+03 9.781803488731384277e-01 1.000000000000000000e+00 2.294773406982421875e+02 -7.275000000000000000e+01 5.875000000000000000e+01
7.000000000000000000e+00 5.936384615384616836e+02 3.046664428710937500e+02 -8.244110107421875000e+00 8.551501035690307617e-01 0.000000000000000000e+00 9.745515747070312500e+02 9.888445138931274414e-01 1.000000000000000000e+00 2.178552551269531250e+02 -7.125000000000000000e+01 5.875000000000000000e+01
1.000000000000000000e+00 5.889461538461536065e+02 3.147366943359375000e+02 -8.168823242187500000e+00 8.349283337593078613e-01 0.000000000000000000e+00 9.222470703125000000e+02 9.976063966751098633e-01 1.000000000000000000e+00 1.953657379150390625e+02 -7.075000000000000000e+01 5.875000000000000000e+01
2.000000000000000000e+00 5.761769230769227761e+02 3.405030517578125000e+02 -7.927795410156250000e+00 7.945289015769958496e-01 0.000000000000000000e+00 7.758303833007812500e+02 1.069098711013793945e+00 1.000000000000000000e+00 1.521201171875000000e+02 -6.925000000000000000e+01 5.875000000000000000e+01
1.000000000000000000e+00 7.809923076923078042e+02 1.739614868164062500e+02 -6.743438720703125000e+00 8.037995100021362305e-01 0.000000000000000000e+00 6.415651245117187500e+02 6.351510882377624512e-01 1.000000000000000000e+00 4.642193298339843750e+02 -6.475000000000000000e+01 5.875000000000000000e+01
1.000000000000000000e+00 8.044769230769228443e+02 1.486353149414062500e+02 -6.607360839843750000e+00 9.440476894378662109e-01 0.000000000000000000e+00 6.229329833984375000e+02 5.782564878463745117e-01 1.000000000000000000e+00 8.047982177734375000e+02 -6.425000000000000000e+01 5.875000000000000000e+01
2.000000000000000000e+00 8.351769230769235719e+02 1.350252075195312500e+02 -6.471313476562500000e+00 7.564336657524108887e-01 0.000000000000000000e+00 6.043009033203125000e+02 5.775622129440307617e-01 1.000000000000000000e+00 4.791610717773437500e+02 -6.375000000000000000e+01 5.875000000000000000e+01
2.100000000000000000e+01 4.120615384615385324e+02 3.228245544433593750e+02 -8.004180908203125000e+00 8.545417785644531250e-01 0.000000000000000000e+00 1.294422241210937500e+03 1.229814171791076660e+00 3.000000000000000000e+00 2.997434082031250000e+02 -9.825000000000000000e+01 5.925000000000000000e+01
1.600000000000000000e+01 4.254230769230767919e+02 3.517294616699218750e+02 -7.973022460937500000e+00 8.629454970359802246e-01 0.000000000000000000e+00 1.281400146484375000e+03 1.201303839683532715e+00 2.000000000000000000e+00 2.479955596923828125e+02 -9.725000000000000000e+01 5.925000000000000000e+01
1.700000000000000000e+01 4.297230769230769170e+02 3.522848205566406250e+02 -7.913360595703125000e+00 8.625352978706359863e-01 0.000000000000000000e+00 1.273740112304687500e+03 1.193856596946716309e+00 2.000000000000000000e+00 2.209287567138671875e+02 -9.675000000000000000e+01 5.925000000000000000e+01
1.600000000000000000e+01 4.336153846153845279e+02 3.474692687988281250e+02 -7.853698730468750000e+00 8.536284565925598145e-01 0.000000000000000000e+00 1.266080200195312500e+03 1.189223766326904297e+00 2.000000000000000000e+00 1.781876831054687500e+02 -9.625000000000000000e+01 5.925000000000000000e+01
1.600000000000000000e+01 4.373999999999999773e+02 3.506015930175781250e+02 -7.794036865234375000e+00 8.391416072845458984e-01 0.000000000000000000e+00 1.258420288085937500e+03 1.187731504440307617e+00 2.000000000000000000e+00 1.154014282226562500e+02 -9.575000000000000000e+01 5.925000000000000000e+01
1.500000000000000000e+01 4.355692307692307281e+02 3.552844848632812500e+02 -7.764770507812500000e+00 8.358792066574096680e-01 0.000000000000000000e+00 1.212205200195312500e+03 1.191305637359619141e+00 2.000000000000000000e+00 6.753710937500000000e+01 -9.525000000000000000e+01 5.925000000000000000e+01
9.000000000000000000e+00 5.092615384615385210e+02 3.618475646972656250e+02 -7.857849121093750000e+00 8.831725716590881348e-01 0.000000000000000000e+00 9.445876464843750000e+02 8.760915398597717285e-01 1.000000000000000000e+00 7.398331451416015625e+01 -7.725000000000000000e+01 5.925000000000000000e+01
7.000000000000000000e+00 5.295230769230770420e+02 3.605105590820312500e+02 -8.041931152343750000e+00 8.840703368186950684e-01 0.000000000000000000e+00 9.871988525390625000e+02 7.326176166534423828e-01 1.000000000000000000e+00 1.069027481079101562e+02 -7.675000000000000000e+01 5.925000000000000000e+01
2.000000000000000000e+00 5.364153846153842551e+02 3.570266113281250000e+02 -8.220367431640625000e+00 8.825507164001464844e-01 0.000000000000000000e+00 9.888807373046875000e+02 7.234508395195007324e-01 1.000000000000000000e+00 1.198220977783203125e+02 -7.625000000000000000e+01 5.925000000000000000e+01
7.000000000000000000e+00 5.394769230769235264e+02 3.505597534179687500e+02 -8.398773193359375000e+00 8.772416114807128906e-01 0.000000000000000000e+00 9.905625610351562500e+02 7.263973355293273926e-01 1.000000000000000000e+00 1.440204162597656250e+02 -7.575000000000000000e+01 5.925000000000000000e+01
3.000000000000000000e+00 5.438615384615385437e+02 3.416991882324218750e+02 -8.577209472656250000e+00 8.789879679679870605e-01 0.000000000000000000e+00 9.922444458007812500e+02 7.552538514137268066e-01 1.000000000000000000e+00 1.377985076904296875e+02 -7.525000000000000000e+01 5.925000000000000000e+01
2.000000000000000000e+00 5.461692307692306940e+02 3.302122497558593750e+02 -8.708618164062500000e+00 8.658378124237060547e-01 0.000000000000000000e+00 9.900906982421875000e+02 7.400870323181152344e-01 1.000000000000000000e+00 1.484582672119140625e+02 -7.475000000000000000e+01 5.925000000000000000e+01
3.000000000000000000e+00 5.511923076923075087e+02 3.173304748535156250e+02 -8.793029785156250000e+00 9.004983305931091309e-01 0.000000000000000000e+00 9.841014404296875000e+02 8.674294948577880859e-01 1.000000000000000000e+00 2.200731811523437500e+02 -7.425000000000000000e+01 5.925000000000000000e+01
1.000000000000000000e+00 5.540384615384616609e+02 3.033781127929687500e+02 -8.877441406250000000e+00 8.772822022438049316e-01 0.000000000000000000e+00 9.781121215820312500e+02 9.650304913520812988e-01 1.000000000000000000e+00 1.725852661132812500e+02 -7.375000000000000000e+01 5.925000000000000000e+01
9.000000000000000000e+00 5.526153846153848690e+02 2.843845825195312500e+02 -8.961853027343750000e+00 8.697474598884582520e-01 0.000000000000000000e+00 9.721228637695312500e+02 9.669535756111145020e-01 1.000000000000000000e+00 1.512196655273437500e+02 -7.325000000000000000e+01 5.925000000000000000e+01
5.000000000000000000e+00 5.596615384615384983e+02 2.602048645019531250e+02 -8.781555175781250000e+00 8.907994031906127930e-01 0.000000000000000000e+00 9.447847900390625000e+02 8.054287433624267578e-01 1.000000000000000000e+00 2.329594421386718750e+02 -7.225000000000000000e+01 5.925000000000000000e+01
5.000000000000000000e+00 5.614615384615384528e+02 2.570192565917968750e+02 -8.666503906250000000e+00 8.964883089065551758e-01 0.000000000000000000e+00 9.300186767578125000e+02 7.622281908988952637e-01 1.000000000000000000e+00 2.436838531494140625e+02 -7.175000000000000000e+01 5.925000000000000000e+01
1.300000000000000000e+01 5.576999999999998181e+02 2.601038513183593750e+02 -8.551422119140625000e+00 8.897414207458496094e-01 0.000000000000000000e+00 9.152525634765625000e+02 8.579046130180358887e-01 2.000000000000000000e+00 2.444125366210937500e+02 -7.125000000000000000e+01 5.925000000000000000e+01
2.000000000000000000e+00 5.599000000000002046e+02 2.682603149414062500e+02 -8.463439941406250000e+00 8.922569751739501953e-01 0.000000000000000000e+00 8.357491455078125000e+02 7.819635272026062012e-01 1.000000000000000000e+00 2.477858123779296875e+02 -7.075000000000000000e+01 5.925000000000000000e+01
1.000000000000000000e+01 5.502538461538459842e+02 2.774949035644531250e+02 -8.375488281250000000e+00 8.606322407722473145e-01 0.000000000000000000e+00 7.562457275390625000e+02 8.735691308975219727e-01 2.000000000000000000e+00 1.874528961181640625e+02 -7.025000000000000000e+01 5.925000000000000000e+01
8.000000000000000000e+00 5.324538461538460297e+02 2.863941650390625000e+02 -8.287506103515625000e+00 7.910482883453369141e-01 0.000000000000000000e+00 6.767423095703125000e+02 1.012790441513061523e+00 1.000000000000000000e+00 5.614495468139648438e+01 -6.975000000000000000e+01 5.925000000000000000e+01
9.000000000000000000e+00 7.525538461538459387e+02 1.578445281982421875e+02 -6.785461425781250000e+00 9.153401255607604980e-01 0.000000000000000000e+00 5.269805908203125000e+02 6.427252888679504395e-01 1.000000000000000000e+00 4.327893676757812500e+02 -6.475000000000000000e+01 5.925000000000000000e+01
1.000000000000000000e+01 7.823153846153848008e+02 1.368246459960937500e+02 -6.647277832031250000e+00 9.573660492897033691e-01 0.000000000000000000e+00 5.164578247070312500e+02 6.152887344360351562e-01 2.000000000000000000e+00 4.314931945800781250e+02 -6.425000000000000000e+01 5.925000000000000000e+01
3.400000000000000000e+01 3.722461538461539021e+02 2.492139587402343750e+02 -8.435180664062500000e+00 8.524813652038574219e-01 0.000000000000000000e+00 1.242861206054687500e+03 1.204640388488769531e+00 3.000000000000000000e+00 3.128058471679687500e+02 -9.975000000000000000e+01 5.975000000000000000e+01
1.300000000000000000e+01 3.871461538461538225e+02 2.722449645996093750e+02 -8.425476074218750000e+00 8.995563983917236328e-01 0.000000000000000000e+00 1.225429443359375000e+03 1.196800708770751953e+00 2.000000000000000000e+00 3.176500549316406250e+02 -9.825000000000000000e+01 5.975000000000000000e+01
1.800000000000000000e+01 4.073846153846153584e+02 3.087551574707031250e+02 -8.334106445312500000e+00 8.990881443023681641e-01 0.000000000000000000e+00 1.216057861328125000e+03 1.168693065643310547e+00 2.000000000000000000e+00 2.519509429931640625e+02 -9.725000000000000000e+01 5.975000000000000000e+01
2.100000000000000000e+01 4.076999999999999318e+02 3.172451782226562500e+02 -8.255615234375000000e+00 8.907337188720703125e-01 0.000000000000000000e+00 1.209805175781250000e+03 1.159581303596496582e+00 3.000000000000000000e+00 1.959218597412109375e+02 -9.675000000000000000e+01 5.975000000000000000e+01
1.000000000000000000e+01 4.124846153846153811e+02 3.244620056152343750e+02 -8.177124023437500000e+00 8.954099416732788086e-01 0.000000000000000000e+00 1.203552612304687500e+03 1.153686165809631348e+00 2.000000000000000000e+00 1.738996124267578125e+02 -9.625000000000000000e+01 5.975000000000000000e+01
1.900000000000000000e+01 4.109076923076922299e+02 3.328773193359375000e+02 -8.098632812500000000e+00 8.859160542488098145e-01 0.000000000000000000e+00 1.197300048828125000e+03 1.151965379714965820e+00 2.000000000000000000e+00 1.159417266845703125e+02 -9.575000000000000000e+01 5.975000000000000000e+01
1.900000000000000000e+01 4.084384615384615813e+02 3.411221923828125000e+02 -8.096496582031250000e+00 8.793447017669677734e-01 0.000000000000000000e+00 1.135730590820312500e+03 1.158854126930236816e+00 2.000000000000000000e+00 7.050101470947265625e+01 -9.525000000000000000e+01 5.975000000000000000e+01
1.000000000000000000e+00 4.902384615384616495e+02 3.563610229492187500e+02 -8.292633056640625000e+00 8.907043933868408203e-01 0.000000000000000000e+00 9.088676147460937500e+02 7.219622731208801270e-01 1.000000000000000000e+00 3.817345046997070312e+01 -7.725000000000000000e+01 5.975000000000000000e+01
1.000000000000000000e+00 5.070769230769232081e+02 3.535330200195312500e+02 -8.508666992187500000e+00 9.129576086997985840e-01 0.000000000000000000e+00 9.470072631835937500e+02 7.091060280799865723e-01 1.000000000000000000e+00 1.094699630737304688e+02 -7.675000000000000000e+01 5.975000000000000000e+01
3.000000000000000000e+00 5.139923076923076906e+02 3.479279479980468750e+02 -8.704925537109375000e+00 9.078615903854370117e-01 0.000000000000000000e+00 9.454429321289062500e+02 7.037653923034667969e-01 1.000000000000000000e+00 1.160218200683593750e+02 -7.625000000000000000e+01 5.975000000000000000e+01
2.000000000000000000e+00 5.180923076923074859e+02 3.387710876464843750e+02 -8.901184082031250000e+00 9.099771380424499512e-01 0.000000000000000000e+00 9.438785400390625000e+02 7.048624753952026367e-01 1.000000000000000000e+00 1.543742523193359375e+02 -7.575000000000000000e+01 5.975000000000000000e+01
0.000000000000000000e+00 5.215538461538460524e+02 3.257198486328125000e+02 -9.097473144531250000e+00 9.044165611267089844e-01 0.000000000000000000e+00 9.423142089843750000e+02 7.079485058784484863e-01 1.000000000000000000e+00 1.530891113281250000e+02 -7.525000000000000000e+01 5.975000000000000000e+01
2.000000000000000000e+00 5.341384615384617973e+02 2.403454132080078125e+02 -9.435852050781250000e+00 9.259156584739685059e-01 0.000000000000000000e+00 9.146382446289062500e+02 7.529543638229370117e-01 1.000000000000000000e+00 2.277849731445312500e+02 -7.325000000000000000e+01 5.975000000000000000e+01
3.000000000000000000e+00 5.218230769230769965e+02 2.275496673583984375e+02 -9.334167480468750000e+00 9.012376070022583008e-01 0.000000000000000000e+00 9.013645019531250000e+02 8.038607239723205566e-01 1.000000000000000000e+00 2.013024902343750000e+02 -7.275000000000000000e+01 5.975000000000000000e+01
1.500000000000000000e+01 5.249615384615385665e+02 2.154606170654296875e+02 -9.175689697265625000e+00 9.293516278266906738e-01 0.000000000000000000e+00 8.862275390625000000e+02 7.045484781265258789e-01 2.000000000000000000e+00 2.632613220214843750e+02 -7.225000000000000000e+01 5.975000000000000000e+01
3.000000000000000000e+00 5.261230769230768374e+02 2.120823974609375000e+02 -9.017211914062500000e+00 9.057322144508361816e-01 0.000000000000000000e+00 8.710905761718750000e+02 7.023028135299682617e-01 1.000000000000000000e+00 2.000536651611328125e+02 -7.175000000000000000e+01 5.975000000000000000e+01
2.000000000000000000e+00 5.262538461538463253e+02 2.128694000244140625e+02 -8.858734130859375000e+00 9.058945775032043457e-01 0.000000000000000000e+00 8.559535522460937500e+02 7.794571518898010254e-01 1.000000000000000000e+00 2.092599487304687500e+02 -7.125000000000000000e+01 5.975000000000000000e+01
5.000000000000000000e+00 5.174461538461538339e+02 2.161919097900390625e+02 -8.758087158203125000e+00 8.894676566123962402e-01 0.000000000000000000e+00 7.492512207031250000e+02 7.151114344596862793e-01 1.000000000000000000e+00 1.711533203125000000e+02 -7.075000000000000000e+01 5.975000000000000000e+01
6.000000000000000000e+00 5.164615384615383391e+02 2.218251037597656250e+02 -8.657440185546875000e+00 8.789837956428527832e-01 0.000000000000000000e+00 6.425488891601562500e+02 8.718790411949157715e-01 1.000000000000000000e+00 1.417284698486328125e+02 -7.025000000000000000e+01 5.975000000000000000e+01
9.000000000000000000e+00 7.075000000000000000e+02 1.434066009521484375e+02 -6.827514648437500000e+00 8.711231946945190430e-01 0.000000000000000000e+00 4.123960876464843750e+02 6.488906741142272949e-01 1.000000000000000000e+00 2.165248870849609375e+02 -6.475000000000000000e+01 5.975000000000000000e+01
9.000000000000000000e+00 3.611923076923077360e+02 2.310338592529296875e+02 -9.028503417968750000e+00 9.079027175903320312e-01 0.000000000000000000e+00 1.175383544921875000e+03 9.099647402763366699e-01 1.000000000000000000e+00 2.871124877929687500e+02 -9.925000000000000000e+01 6.025000000000000000e+01
8.000000000000000000e+00 3.649230769230769056e+02 2.363700714111328125e+02 -8.971618652343750000e+00 9.184125065803527832e-01 0.000000000000000000e+00 1.173083984375000000e+03 8.996401429176330566e-01 1.000000000000000000e+00 2.964328613281250000e+02 -9.875000000000000000e+01 6.025000000000000000e+01
1.500000000000000000e+01 3.676538461538462457e+02 2.487026977539062500e+02 -8.914703369140625000e+00 9.196573495864868164e-01 0.000000000000000000e+00 1.170784423828125000e+03 9.968387484550476074e-01 2.000000000000000000e+00 2.786199645996093750e+02 -9.825000000000000000e+01 6.025000000000000000e+01
1.500000000000000000e+01 3.701769230769231740e+02 2.646058959960937500e+02 -8.857818603515625000e+00 9.101607799530029297e-01 0.000000000000000000e+00 1.168484741210937500e+03 1.165746569633483887e+00 2.000000000000000000e+00 2.064520263671875000e+02 -9.775000000000000000e+01 6.025000000000000000e+01
1.100000000000000000e+01 3.714461538461538339e+02 2.791310119628906250e+02 -8.785675048828125000e+00 9.046074748039245605e-01 0.000000000000000000e+00 1.164565551757812500e+03 1.159370899200439453e+00 2.000000000000000000e+00 1.580728607177734375e+02 -9.725000000000000000e+01 6.025000000000000000e+01
9.000000000000000000e+00 3.867230769230769170e+02 3.146377258300781250e+02 -8.523559570312500000e+00 9.120739102363586426e-01 0.000000000000000000e+00 1.147948974609375000e+03 1.129336357116699219e+00 1.000000000000000000e+00 9.518626403808593750e+01 -9.575000000000000000e+01 6.025000000000000000e+01
6.000000000000000000e+00 4.955076923076920821e+02 3.407890930175781250e+02 -9.031005859375000000e+00 9.168376922607421875e-01 0.000000000000000000e+00 8.953015136718750000e+02 6.948735713958740234e-01 1.000000000000000000e+00 4.185415267944335938e+01 -7.675000000000000000e+01 6.025000000000000000e+01
3.000000000000000000e+00 5.027923076923076451e+02 3.186157531738281250e+02 -9.436187744140625000e+00 9.316000938415527344e-01 0.000000000000000000e+00 8.868742675781250000e+02 6.847957968711853027e-01 1.000000000000000000e+00 1.537046661376953125e+02 -7.575000000000000000e+01 6.025000000000000000e+01
1.000000000000000000e+00 5.022692307692306031e+02 3.005911560058593750e+02 -9.638763427734375000e+00 9.307314753532409668e-01 0.000000000000000000e+00 8.826606445312500000e+02 6.778691411018371582e-01 1.000000000000000000e+00 1.468100738525390625e+02 -7.525000000000000000e+01 6.025000000000000000e+01
1.000000000000000000e+01 5.122461538461540158e+02 2.774055786132812500e+02 -9.740173339843750000e+00 9.477792978286743164e-01 0.000000000000000000e+00 8.775868530273437500e+02 6.621242165565490723e-01 2.000000000000000000e+00 2.192637634277343750e+02 -7.475000000000000000e+01 6.025000000000000000e+01
1.000000000000000000e+00 5.136923076923077360e+02 2.206556091308593750e+02 -9.740600585937500000e+00 9.412844777107238770e-01 0.000000000000000000e+00 8.657189941406250000e+02 6.560006737709045410e-01 1.000000000000000000e+00 2.097080688476562500e+02 -7.375000000000000000e+01 6.025000000000000000e+01
4.000000000000000000e+00 5.139769230769231854e+02 1.972031707763671875e+02 -9.740844726562500000e+00 9.527059197425842285e-01 0.000000000000000000e+00 8.597850341796875000e+02 6.552898287773132324e-01 1.000000000000000000e+00 2.690091857910156250e+02 -7.325000000000000000e+01 6.025000000000000000e+01
2.000000000000000000e+00 5.070384615384613767e+02 1.852625274658203125e+02 -9.626373291015625000e+00 9.294567108154296875e-01 0.000000000000000000e+00 8.377058105468750000e+02 6.599713563919067383e-01 1.000000000000000000e+00 1.805874328613281250e+02 -7.275000000000000000e+01 6.025000000000000000e+01
2.000000000000000000e+00 5.005846153846153470e+02 1.743367767333984375e+02 -9.473693847656250000e+00 9.315778017044067383e-01 0.000000000000000000e+00 8.102448730468750000e+02 6.704788804054260254e-01 1.000000000000000000e+00 2.199779052734375000e+02 -7.225000000000000000e+01 6.025000000000000000e+01
7.000000000000000000e+00 4.960846153846151765e+02 1.712310791015625000e+02 -9.320983886718750000e+00 9.082038998603820801e-01 0.000000000000000000e+00 7.827838745117187500e+02 6.711744070053100586e-01 1.000000000000000000e+00 1.436017456054687500e+02 -7.175000000000000000e+01 6.025000000000000000e+01
9.000000000000000000e+00 4.929769230769230717e+02 1.709663391113281250e+02 -9.168304443359375000e+00 9.181748628616333008e-01 0.000000000000000000e+00 7.553229370117187500e+02 6.664223074913024902e-01 1.000000000000000000e+00 1.891547851562500000e+02 -7.125000000000000000e+01 6.025000000000000000e+01
2.000000000000000000e+00 3.339615384615384528e+02 2.317886352539062500e+02 -9.570404052734375000e+00 9.498723745346069336e-01 0.000000000000000000e+00 1.135984375000000000e+03 8.924933075904846191e-01 1.000000000000000000e+00 3.342958984375000000e+02 -9.975000000000000000e+01 6.075000000000000000e+01
1.300000000000000000e+01 3.481846153846153697e+02 2.370810394287109375e+02 -9.538665771484375000e+00 9.394873380661010742e-01 0.000000000000000000e+00 1.130862426757812500e+03 1.007261276245117188e+00 2.000000000000000000e+00 2.728189697265625000e+02 -9.875000000000000000e+01 6.075000000000000000e+01
1.400000000000000000e+01 3.533076923076923208e+02 2.518653106689453125e+02 -9.326721191406250000e+00 9.392645359039306641e-01 0.000000000000000000e+00 1.126769042968750000e+03 1.135020375251770020e+00 2.000000000000000000e+00 1.721869201660156250e+02 -9.725000000000000000e+01 6.075000000000000000e+01
8.000000000000000000e+00 3.605846153846154039e+02 2.614401855468750000e+02 -9.240295410156250000e+00 9.410665631294250488e-01 0.000000000000000000e+00 1.121258056640625000e+03 1.122920393943786621e+00 1.000000000000000000e+00 1.539809570312500000e+02 -9.675000000000000000e+01 6.075000000000000000e+01
1.100000000000000000e+01 3.657307692307692264e+02 2.710796203613281250e+02 -9.153869628906250000e+00 9.422203302383422852e-01 0.000000000000000000e+00 1.115746948242187500e+03 1.107884764671325684e+00 2.000000000000000000e+00 1.224634628295898438e+02 -9.625000000000000000e+01 6.075000000000000000e+01
6.000000000000000000e+00 3.661769230769230035e+02 2.810213012695312500e+02 -9.067443847656250000e+00 9.371404647827148438e-01 0.000000000000000000e+00 1.110235961914062500e+03 1.097368836402893066e+00 1.000000000000000000e+00 9.673062133789062500e+01 -9.575000000000000000e+01 6.075000000000000000e+01
9.000000000000000000e+00 3.578230769230769965e+02 2.881872863769531250e+02 -9.051788330078125000e+00 9.374214410781860352e-01 0.000000000000000000e+00 1.064428588867187500e+03 1.092656731605529785e+00 1.000000000000000000e+00 5.212133407592773438e+01 -9.525000000000000000e+01 6.075000000000000000e+01
1.100000000000000000e+01 4.789846153846152106e+02 3.297016601562500000e+02 -9.345611572265625000e+00 9.340439438819885254e-01 0.000000000000000000e+00 8.023585815429687500e+02 6.850512623786926270e-01 2.000000000000000000e+00 2.771309661865234375e+01 -7.725000000000000000e+01 6.075000000000000000e+01
6.000000000000000000e+00 4.883461538461540385e+02 3.240199890136718750e+02 -9.608306884765625000e+00 9.454435706138610840e-01 0.000000000000000000e+00 8.322097167968750000e+02 6.714853644371032715e-01 1.000000000000000000e+00 1.146541519165039062e+02 -7.675000000000000000e+01 6.075000000000000000e+01
2.000000000000000000e+00 4.907615384615384073e+02 3.130156250000000000e+02 -9.805816650390625000e+00 9.511873722076416016e-01 0.000000000000000000e+00 8.259371948242187500e+02 6.576474905014038086e-01 1.000000000000000000e+00 1.624010925292968750e+02 -7.625000000000000000e+01 6.075000000000000000e+01
0.000000000000000000e+00 4.989153846153846530e+02 2.949706115722656250e+02 -1.000335693359375000e+01 9.538940787315368652e-01 0.000000000000000000e+00 8.196646118164062500e+02 6.449723839759826660e-01 1.000000000000000000e+00 1.644809417724609375e+02 -7.575000000000000000e+01 6.075000000000000000e+01
5.000000000000000000e+00 5.046076923076922753e+02 2.378188629150390625e+02 -1.023947143554687500e+01 9.601421356201171875e-01 0.000000000000000000e+00 8.098669433593750000e+02 6.211616396903991699e-01 1.000000000000000000e+00 2.616252441406250000e+02 -7.475000000000000000e+01 6.075000000000000000e+01
8.000000000000000000e+00 5.072230769230770875e+02 2.068632812500000000e+02 -1.011920166015625000e+01 9.676154851913452148e-01 0.000000000000000000e+00 8.090892944335937500e+02 6.138157248497009277e-01 1.000000000000000000e+00 3.039759826660156250e+02 -7.425000000000000000e+01 6.075000000000000000e+01
2.000000000000000000e+00 5.015000000000001137e+02 1.773403015136718750e+02 -9.998931884765625000e+00 9.674398899078369141e-01 0.000000000000000000e+00 8.083115844726562500e+02 6.071472764015197754e-01 1.000000000000000000e+00 3.072793579101562500e+02 -7.375000000000000000e+01 6.075000000000000000e+01
1.000000000000000000e+00 5.118384615384615586e+02 1.571071014404296875e+02 -9.878662109375000000e+00 9.718317389488220215e-01 0.000000000000000000e+00 8.075339355468750000e+02 5.930888056755065918e-01 1.000000000000000000e+00 3.343541259765625000e+02 -7.325000000000000000e+01 6.075000000000000000e+01
1.000000000000000000e+00 5.070692307692306144e+02 1.491295623779296875e+02 -9.774902343750000000e+00 9.663316011428833008e-01 0.000000000000000000e+00 7.686358032226562500e+02 5.926620960235595703e-01 1.000000000000000000e+00 3.145113220214843750e+02 -7.275000000000000000e+01 6.075000000000000000e+01
1.000000000000000000e+00 5.010461538461537430e+02 1.434151916503906250e+02 -9.676635742187500000e+00 9.662674665451049805e-01 0.000000000000000000e+00 7.170308837890625000e+02 5.973147153854370117e-01 1.000000000000000000e+00 3.256410522460937500e+02 -7.225000000000000000e+01 6.075000000000000000e+01
3.000000000000000000e+00 4.879846153846153243e+02 1.389782867431640625e+02 -9.480133056640625000e+00 9.628269076347351074e-01 0.000000000000000000e+00 6.138209838867187500e+02 6.004561185836791992e-01 1.000000000000000000e+00 3.465426025390625000e+02 -7.125000000000000000e+01 6.075000000000000000e+01
0.000000000000000000e+00 4.800538461538458819e+02 1.379164581298828125e+02 -9.288116455078125000e+00 9.581650495529174805e-01 0.000000000000000000e+00 5.432882690429687500e+02 6.069548130035400391e-01 1.000000000000000000e+00 3.101332702636718750e+02 -7.075000000000000000e+01 6.075000000000000000e+01
1.100000000000000000e+01 3.287153846153845507e+02 2.313594970703125000e+02 -1.018377685546875000e+01 9.606368541717529297e-01 0.000000000000000000e+00 1.087411376953125000e+03 1.088151931762695312e+00 2.000000000000000000e+00 2.958907165527343750e+02 -9.925000000000000000e+01 6.125000000000000000e+01
1.500000000000000000e+01 3.341923076923076792e+02 2.279950256347656250e+02 -9.949554443359375000e+00 9.591773152351379395e-01 0.000000000000000000e+00 1.091099487304687500e+03 1.111696600914001465e+00 2.000000000000000000e+00 1.906483459472656250e+02 -9.775000000000000000e+01 6.125000000000000000e+01
1.100000000000000000e+01 3.434769230769230148e+02 2.254049835205078125e+02 -9.782287597656250000e+00 9.641082882881164551e-01 0.000000000000000000e+00 1.083489379882812500e+03 1.093860864639282227e+00 2.000000000000000000e+00 1.717577972412109375e+02 -9.675000000000000000e+01 6.125000000000000000e+01
1.200000000000000000e+01 3.451461538461538225e+02 2.294841308593750000e+02 -9.611358642578125000e+00 9.632191061973571777e-01 0.000000000000000000e+00 1.072522949218750000e+03 1.070580363273620605e+00 2.000000000000000000e+00 1.174882736206054688e+02 -9.575000000000000000e+01 6.125000000000000000e+01
1.300000000000000000e+01 3.453692307692308532e+02 2.335024108886718750e+02 -9.577697753906250000e+00 9.629565477371215820e-01 0.000000000000000000e+00 1.042284179687500000e+03 1.058423161506652832e+00 2.000000000000000000e+00 7.647672271728515625e+01 -9.525000000000000000e+01 6.125000000000000000e+01
1.500000000000000000e+01 3.405615384615384187e+02 2.424691009521484375e+02 -9.561279296875000000e+00 9.623315334320068359e-01 0.000000000000000000e+00 1.003793579101562500e+03 1.050062417984008789e+00 2.000000000000000000e+00 3.608225631713867188e+01 -9.475000000000000000e+01 6.125000000000000000e+01
1.000000000000000000e+00 4.935461538461540272e+02 3.018804321289062500e+02 -1.018560791015625000e+01 9.677284359931945801e-01 0.000000000000000000e+00 7.691179809570312500e+02 6.241702437400817871e-01 1.000000000000000000e+00 2.062717285156250000e+02 -7.675000000000000000e+01 6.125000000000000000e+01
6.000000000000000000e+00 5.013769230769231058e+02 2.633745727539062500e+02 -1.057052612304687500e+01 9.702788591384887695e-01 0.000000000000000000e+00 7.524549560546875000e+02 6.015446186065673828e-01 1.000000000000000000e+00 2.288953704833984375e+02 -7.575000000000000000e+01 6.125000000000000000e+01
1.000000000000000000e+00 5.036538461538462457e+02 2.332227325439453125e+02 -1.076296997070312500e+01 9.755875468254089355e-01 0.000000000000000000e+00 7.441234741210937500e+02 5.892698764801025391e-01 1.000000000000000000e+00 2.877864685058593750e+02 -7.525000000000000000e+01 6.125000000000000000e+01
1.000000000000000000e+00 5.018153846153845166e+02 1.993195495605468750e+02 -1.073880004882812500e+01 9.776334762573242188e-01 0.000000000000000000e+00 7.421470336914062500e+02 5.771957635879516602e-01 1.000000000000000000e+00 3.049529418945312500e+02 -7.475000000000000000e+01 6.125000000000000000e+01
1.000000000000000000e+00 4.985307692307692946e+02 1.705495452880859375e+02 -1.049801635742187500e+01 9.843496680259704590e-01 0.000000000000000000e+00 7.465255737304687500e+02 5.650320649147033691e-01 1.000000000000000000e+00 3.864290161132812500e+02 -7.425000000000000000e+01 6.125000000000000000e+01
0.000000000000000000e+00 5.040153846153843915e+02 1.484159240722656250e+02 -1.025726318359375000e+01 9.893756508827209473e-01 0.000000000000000000e+00 7.509041748046875000e+02 5.476124286651611328e-01 1.000000000000000000e+00 4.934877014160156250e+02 -7.375000000000000000e+01 6.125000000000000000e+01
0.000000000000000000e+00 5.048230769230771102e+02 1.260114669799804688e+02 -9.923400878906250000e+00 9.868878126144409180e-01 0.000000000000000000e+00 6.995657348632812500e+02 5.354063510894775391e-01 1.000000000000000000e+00 4.499056396484375000e+02 -7.275000000000000000e+01 6.125000000000000000e+01
1.300000000000000000e+01 4.993999999999996930e+02 1.186998901367187500e+02 -9.879577636718750000e+00 9.753350019454956055e-01 0.000000000000000000e+00 6.238168334960937500e+02 5.590201616287231445e-01 2.000000000000000000e+00 2.757125549316406250e+02 -7.225000000000000000e+01 6.125000000000000000e+01
1.000000000000000000e+00 1.182199999999999818e+03 4.272556457519531250e+02 -6.902679443359375000e+00 2.629461884498596191e-01 0.000000000000000000e+00 2.514123687744140625e+02 1.103892326354980469e+00 1.000000000000000000e+00 6.300252075195312500e+02 -4.775000000000000000e+01 6.125000000000000000e+01
1.500000000000000000e+01 8.131307692307693742e+02 4.132931518554687500e+02 -8.346527099609375000e+00 1.729847192764282227e-01 0.000000000000000000e+00 2.030493316650390625e+02 6.871356964111328125e-01 2.000000000000000000e+00 5.205593872070312500e+02 -4.575000000000000000e+01 6.125000000000000000e+01
2.000000000000000000e+00 9.216615384615380435e+02 3.826877441406250000e+02 -8.425415039062500000e+00 1.436514407396316528e-01 0.000000000000000000e+00 2.038688812255859375e+02 9.172619581222534180e-01 1.000000000000000000e+00 5.420273437500000000e+02 -4.525000000000000000e+01 6.125000000000000000e+01
7.000000000000000000e+00 3.081076923076923322e+02 2.294194946289062500e+02 -1.074475097656250000e+01 9.728832244873046875e-01 0.000000000000000000e+00 1.042331665039062500e+03 1.108691573143005371e+00 1.000000000000000000e+00 3.081559143066406250e+02 -9.975000000000000000e+01 6.175000000000000000e+01
9.000000000000000000e+00 3.166846153846154266e+02 2.220154724121093750e+02 -1.067272949218750000e+01 9.785638451576232910e-01 0.000000000000000000e+00 1.046419189453125000e+03 1.092555642127990723e+00 1.000000000000000000e+00 2.984377136230468750e+02 -9.875000000000000000e+01 6.175000000000000000e+01
1.900000000000000000e+01 3.239769230769230148e+02 2.177397155761718750e+02 -1.058407592773437500e+01 9.731016755104064941e-01 0.000000000000000000e+00 1.049412963867187500e+03 1.083894491195678711e+00 2.000000000000000000e+00 2.044556732177734375e+02 -9.825000000000000000e+01 6.175000000000000000e+01
1.200000000000000000e+01 3.213538461538462343e+02 2.068107147216796875e+02 -1.032427978515625000e+01 9.747569561004638672e-01 0.000000000000000000e+00 1.045720703125000000e+03 1.078949451446533203e+00 2.000000000000000000e+00 1.622519836425781250e+02 -9.675000000000000000e+01 6.175000000000000000e+01
5.000000000000000000e+00 3.102538461538461547e+02 2.063161926269531250e+02 -1.002221679687500000e+01 9.749273657798767090e-01 0.000000000000000000e+00 9.846560668945312500e+02 8.823609352111816406e-01 1.000000000000000000e+00 2.475667381286621094e+01 -9.425000000000000000e+01 6.175000000000000000e+01
7.000000000000000000e+00 4.653384615384613880e+02 2.782657165527343750e+02 -1.045928955078125000e+01 9.662824869155883789e-01 0.000000000000000000e+00 6.842470092773437500e+02 6.417879462242126465e-01 1.000000000000000000e+00 5.416944885253906250e+01 -7.725000000000000000e+01 6.175000000000000000e+01
5.000000000000000000e+00 4.902846153846155630e+02 2.533360290527343750e+02 -1.095031738281250000e+01 9.734669327735900879e-01 0.000000000000000000e+00 6.956358032226562500e+02 5.894087553024291992e-01 1.000000000000000000e+00 2.040540313720703125e+02 -7.625000000000000000e+01 6.175000000000000000e+01
1.200000000000000000e+01 4.970230769230768146e+02 2.313876800537109375e+02 -1.113769531250000000e+01 9.858508110046386719e-01 0.000000000000000000e+00 6.852453613281250000e+02 5.679138898849487305e-01 2.000000000000000000e+00 3.062755737304687500e+02 -7.575000000000000000e+01 6.175000000000000000e+01
1.000000000000000000e+00 5.064923076923078611e+02 2.076851959228515625e+02 -1.132507324218750000e+01 9.841551184654235840e-01 0.000000000000000000e+00 6.748548583984375000e+02 5.512267351150512695e-01 1.000000000000000000e+00 2.951900024414062500e+02 -7.525000000000000000e+01 6.175000000000000000e+01
0.000000000000000000e+00 4.950615384615382482e+02 1.848497924804687500e+02 -1.123809814453125000e+01 9.861866831779479980e-01 0.000000000000000000e+00 6.744270629882812500e+02 5.505478382110595703e-01 1.000000000000000000e+00 3.256327819824218750e+02 -7.475000000000000000e+01 6.175000000000000000e+01
1.000000000000000000e+00 4.970923076923077701e+02 1.644642486572265625e+02 -1.087683105468750000e+01 9.838484525680541992e-01 0.000000000000000000e+00 6.839619140625000000e+02 5.407293438911437988e-01 1.000000000000000000e+00 3.076801757812500000e+02 -7.425000000000000000e+01 6.175000000000000000e+01
1.000000000000000000e+00 4.923461538461536975e+02 1.466992645263671875e+02 -1.051556396484375000e+01 9.873582124710083008e-01 0.000000000000000000e+00 6.934968261718750000e+02 5.210593342781066895e-01 1.000000000000000000e+00 3.795080261230468750e+02 -7.375000000000000000e+01 6.175000000000000000e+01
0.000000000000000000e+00 5.009000000000002615e+02 1.308212280273437500e+02 -1.015429687500000000e+01 9.967542886734008789e-01 0.000000000000000000e+00 7.030316772460937500e+02 5.226009488105773926e-01 1.000000000000000000e+00 6.169104614257812500e+02 -7.325000000000000000e+01 6.175000000000000000e+01
0.000000000000000000e+00 4.649846153846155516e+02 1.227087249755859375e+02 -1.007192993164062500e+01 9.793706536293029785e-01 0.000000000000000000e+00 6.304957275390625000e+02 5.544897913932800293e-01 1.000000000000000000e+00 3.719981079101562500e+02 -7.275000000000000000e+01 6.175000000000000000e+01
1.200000000000000000e+01 2.996461538461538225e+02 2.077514648437500000e+02 -1.103805541992187500e+01 9.758450388908386230e-01 0.000000000000000000e+00 1.016449829101562500e+03 1.076313138008117676e+00 2.000000000000000000e+00 1.686161193847656250e+02 -9.875000000000000000e+01 6.225000000000000000e+01
0.000000000000000000e+00 3.003769230769231058e+02 2.025536956787109375e+02 -1.096359252929687500e+01 9.788730740547180176e-01 0.000000000000000000e+00 1.019669677734375000e+03 1.072975754737854004e+00 1.000000000000000000e+00 1.452349090576171875e+02 -9.825000000000000000e+01 6.225000000000000000e+01
5.000000000000000000e+00 3.081153846153846416e+02 1.958389434814453125e+02 -1.081863403320312500e+01 9.817335605621337891e-01 0.000000000000000000e+00 1.021825439453125000e+03 1.065980195999145508e+00 1.000000000000000000e+00 1.499750366210937500e+02 -9.725000000000000000e+01 6.225000000000000000e+01
1.400000000000000000e+01 3.093692307692307963e+02 1.923538513183593750e+02 -1.075216674804687500e+01 9.829657673835754395e-01 0.000000000000000000e+00 1.016477294921875000e+03 1.060674786567687988e+00 2.000000000000000000e+00 1.525332183837890625e+02 -9.675000000000000000e+01 6.225000000000000000e+01
1.400000000000000000e+01 3.127769230769230830e+02 1.891778106689453125e+02 -1.068566894531250000e+01 9.851354360580444336e-01 0.000000000000000000e+00 1.011129150390625000e+03 1.052245140075683594e+00 2.000000000000000000e+00 1.516930389404296875e+02 -9.625000000000000000e+01 6.225000000000000000e+01
5.000000000000000000e+00 3.131538461538461320e+02 1.878052978515625000e+02 -1.061920166015625000e+01 9.820536971092224121e-01 0.000000000000000000e+00 1.005781005859375000e+03 1.043000578880310059e+00 1.000000000000000000e+00 1.003151550292968750e+02 -9.575000000000000000e+01 6.225000000000000000e+01
1.500000000000000000e+01 3.049076923076923435e+02 1.939716644287109375e+02 -1.049874877929687500e+01 9.870169162750244141e-01 0.000000000000000000e+00 9.757363281250000000e+02 7.614769339561462402e-01 2.000000000000000000e+00 6.502632904052734375e+01 -9.425000000000000000e+01 6.225000000000000000e+01
1.000000000000000000e+00 4.811384615384616836e+02 2.500463104248046875e+02 -1.072125244140625000e+01 9.916888475418090820e-01 0.000000000000000000e+00 6.053504028320312500e+02 5.818624496459960938e-01 1.000000000000000000e+00 3.171660156250000000e+02 -7.725000000000000000e+01 6.225000000000000000e+01
1.000000000000000000e+00 4.961538461538460183e+02 2.443978271484375000e+02 -1.097848510742187500e+01 9.919053316116333008e-01 0.000000000000000000e+00 6.193178710937500000e+02 5.635797381401062012e-01 1.000000000000000000e+00 3.523237609863281250e+02 -7.675000000000000000e+01 6.225000000000000000e+01
1.000000000000000000e+00 4.843846153846150173e+02 2.346166687011718750e+02 -1.113116455078125000e+01 9.913160800933837891e-01 0.000000000000000000e+00 6.080396118164062500e+02 5.783696174621582031e-01 1.000000000000000000e+00 3.272679443359375000e+02 -7.625000000000000000e+01 6.225000000000000000e+01
0.000000000000000000e+00 4.600076923076925368e+02 2.234776611328125000e+02 -1.128384399414062500e+01 9.773144125938415527e-01 0.000000000000000000e+00 5.967613525390625000e+02 5.961093306541442871e-01 1.000000000000000000e+00 1.358487548828125000e+02 -7.575000000000000000e+01 6.225000000000000000e+01
1.000000000000000000e+00 4.504153846153849372e+02 1.689931488037109375e+02 -1.067639160156250000e+01 9.888104200363159180e-01 0.000000000000000000e+00 6.017979125976562500e+02 5.894702672958374023e-01 1.000000000000000000e+00 3.171245117187500000e+02 -7.375000000000000000e+01 6.225000000000000000e+01
8.000000000000000000e+00 1.199792307692308441e+03 4.217380065917968750e+02 -8.284790039062500000e+00 1.308514922857284546e-01 0.000000000000000000e+00 1.198672790527343750e+02 7.906161546707153320e-01 1.000000000000000000e+00 2.232490081787109375e+02 -4.925000000000000000e+01 6.225000000000000000e+01
0.000000000000000000e+00 2.858000000000000682e+02 1.920561218261718750e+02 -1.136349487304687500e+01 9.899399876594543457e-01 0.000000000000000000e+00 9.891325683593750000e+02 1.046003460884094238e+00 1.000000000000000000e+00 2.887380981445312500e+02 -9.925000000000000000e+01 6.275000000000000000e+01
0.000000000000000000e+00 2.882615384615385210e+02 1.865320892333984375e+02 -1.131417846679687500e+01 9.864506125450134277e-01 0.000000000000000000e+00 9.918981323242187500e+02 1.047240972518920898e+00 1.000000000000000000e+00 1.677830963134765625e+02 -9.875000000000000000e+01 6.275000000000000000e+01
8.000000000000000000e+00 2.950384615384615472e+02 1.780290069580078125e+02 -1.112954711914062500e+01 9.893651604652404785e-01 0.000000000000000000e+00 9.910035400390625000e+02 1.032807588577270508e+00 1.000000000000000000e+00 1.527776489257812500e+02 -9.675000000000000000e+01 6.275000000000000000e+01
1.700000000000000000e+01 3.036076923076923322e+02 1.787362213134765625e+02 -1.108865356445312500e+01 9.891276359558105469e-01 0.000000000000000000e+00 9.857977294921875000e+02 1.029750585556030273e+00 2.000000000000000000e+00 1.363340759277343750e+02 -9.625000000000000000e+01 6.275000000000000000e+01
9.000000000000000000e+00 2.991615384615384983e+02 1.854481811523437500e+02 -1.099768066406250000e+01 9.914577603340148926e-01 0.000000000000000000e+00 9.633970947265625000e+02 7.512176632881164551e-01 1.000000000000000000e+00 9.787687683105468750e+01 -9.475000000000000000e+01 6.275000000000000000e+01
1.400000000000000000e+01 2.958000000000000114e+02 1.936889648437500000e+02 -1.095211791992187500e+01 9.914830923080444336e-01 0.000000000000000000e+00 9.452331542968750000e+02 7.350341081619262695e-01 2.000000000000000000e+00 6.350445938110351562e+01 -9.375000000000000000e+01 6.275000000000000000e+01
8.000000000000000000e+00 2.869615384615384528e+02 1.963824005126953125e+02 -1.093228149414062500e+01 9.910055994987487793e-01 0.000000000000000000e+00 9.079965820312500000e+02 7.338227033615112305e-01 1.000000000000000000e+00 4.902114486694335938e+01 -9.325000000000000000e+01 6.275000000000000000e+01
7.000000000000000000e+00 2.856076923076922753e+02 1.980903930664062500e+02 -1.091244506835937500e+01 9.901234507560729980e-01 0.000000000000000000e+00 8.707600097656250000e+02 7.325076460838317871e-01 1.000000000000000000e+00 7.543384552001953125e+00 -9.275000000000000000e+01 6.275000000000000000e+01
0.000000000000000000e+00 4.207538461538463821e+02 1.742206878662109375e+02 -9.705108642578125000e+00 9.817746281623840332e-01 0.000000000000000000e+00 4.125858459472656250e+02 5.790839195251464844e-01 1.000000000000000000e+00 2.292258605957031250e+02 -6.925000000000000000e+01 6.275000000000000000e+01
0.000000000000000000e+00 4.486769230769231172e+02 1.780078430175781250e+02 -9.625732421875000000e+00 9.901807904243469238e-01 0.000000000000000000e+00 4.009908142089843750e+02 5.383728742599487305e-01 1.000000000000000000e+00 4.264676208496093750e+02 -6.875000000000000000e+01 6.275000000000000000e+01
0.000000000000000000e+00 4.704000000000000341e+02 1.805982360839843750e+02 -9.546356201171875000e+00 9.965792298316955566e-01 0.000000000000000000e+00 3.893957824707031250e+02 4.993934333324432373e-01 1.000000000000000000e+00 5.962243041992187500e+02 -6.825000000000000000e+01 6.275000000000000000e+01
0.000000000000000000e+00 2.701230769230769511e+02 1.776752929687500000e+02 -1.160723876953125000e+01 9.932447075843811035e-01 0.000000000000000000e+00 9.602882690429687500e+02 7.697511911392211914e-01 1.000000000000000000e+00 3.037164611816406250e+02 -9.975000000000000000e+01 6.325000000000000000e+01
1.000000000000000000e+01 2.772000000000000455e+02 1.738027954101562500e+02 -1.161447143554687500e+01 9.933115243911743164e-01 0.000000000000000000e+00 9.650351562500000000e+02 7.908282876014709473e-01 2.000000000000000000e+00 2.729694824218750000e+02 -9.925000000000000000e+01 6.325000000000000000e+01
0.000000000000000000e+00 2.800461538461538566e+02 1.711242218017578125e+02 -1.159030151367187500e+01 9.922965168952941895e-01 0.000000000000000000e+00 9.673464965820312500e+02 1.011634945869445801e+00 1.000000000000000000e+00 2.249233245849609375e+02 -9.875000000000000000e+01 6.325000000000000000e+01
0.000000000000000000e+00 2.721076923076922753e+02 1.699210968017578125e+02 -1.156613159179687500e+01 9.918653964996337891e-01 0.000000000000000000e+00 9.696578369140625000e+02 1.020599484443664551e+00 1.000000000000000000e+00 1.788034362792968750e+02 -9.825000000000000000e+01 6.325000000000000000e+01
1.000000000000000000e+00 2.764692307692307054e+02 1.697067108154296875e+02 -1.154199218750000000e+01 9.916511774063110352e-01 0.000000000000000000e+00 9.719692382812500000e+02 1.025824308395385742e+00 1.000000000000000000e+00 1.560157165527343750e+02 -9.775000000000000000e+01 6.325000000000000000e+01
1.100000000000000000e+01 2.865846153846154039e+02 1.717808837890625000e+02 -1.149163818359375000e+01 9.939589500427246094e-01 0.000000000000000000e+00 9.604663696289062500e+02 1.007857084274291992e+00 2.000000000000000000e+00 1.523621368408203125e+02 -9.625000000000000000e+01 6.325000000000000000e+01
1.000000000000000000e+01 2.910153846153846189e+02 1.737632904052734375e+02 -1.147631835937500000e+01 9.934299588203430176e-01 0.000000000000000000e+00 9.554029541015625000e+02 9.991124272346496582e-01 2.000000000000000000e+00 1.368756866455078125e+02 -9.575000000000000000e+01 6.325000000000000000e+01
1.200000000000000000e+01 2.883230769230769397e+02 1.849199676513671875e+02 -1.145104980468750000e+01 9.960948824882507324e-01 0.000000000000000000e+00 9.328939208984375000e+02 7.253499031066894531e-01 2.000000000000000000e+00 1.471863250732421875e+02 -9.425000000000000000e+01 6.325000000000000000e+01
1.100000000000000000e+01 2.816615384615384414e+02 1.894697265625000000e+02 -1.144323730468750000e+01 9.943727850914001465e-01 0.000000000000000000e+00 9.251691284179687500e+02 7.193794846534729004e-01 2.000000000000000000e+00 5.231510543823242188e+01 -9.375000000000000000e+01 6.325000000000000000e+01
8.000000000000000000e+00 2.778307692307691923e+02 1.928241424560546875e+02 -1.143743896484375000e+01 9.949839115142822266e-01 0.000000000000000000e+00 8.996848144531250000e+02 7.164549827575683594e-01 1.000000000000000000e+00 6.536006164550781250e+01 -9.325000000000000000e+01 6.325000000000000000e+01
3.000000000000000000e+00 2.758923076923076678e+02 1.955015106201171875e+02 -1.143161010742187500e+01 9.945512413978576660e-01 0.000000000000000000e+00 8.742005615234375000e+02 7.118943333625793457e-01 1.000000000000000000e+00 3.000475502014160156e+01 -9.275000000000000000e+01 6.325000000000000000e+01
1.000000000000000000e+01 2.787538461538462116e+02 1.975248107910156250e+02 -1.142581176757812500e+01 9.946652054786682129e-01 0.000000000000000000e+00 8.487163085937500000e+02 7.019979953765869141e-01 2.000000000000000000e+00 2.740630722045898438e+01 -9.225000000000000000e+01 6.325000000000000000e+01
5.000000000000000000e+00 2.923384615384616154e+02 1.985437011718750000e+02 -1.141473388671875000e+01 9.964159727096557617e-01 0.000000000000000000e+00 8.197222290039062500e+02 6.912825703620910645e-01 1.000000000000000000e+00 1.209912185668945312e+02 -9.175000000000000000e+01 6.325000000000000000e+01
1.000000000000000000e+01 2.939769230769230717e+02 1.989206848144531250e+02 -1.138787841796875000e+01 9.974842667579650879e-01 0.000000000000000000e+00 7.801990356445312500e+02 6.899839043617248535e-01 2.000000000000000000e+00 1.282031402587890625e+02 -9.125000000000000000e+01 6.325000000000000000e+01
0.000000000000000000e+00 3.994923076923076906e+02 1.958663940429687500e+02 -1.052230834960937500e+01 9.822685122489929199e-01 0.000000000000000000e+00 4.754264831542968750e+02 5.526650547981262207e-01 1.000000000000000000e+00 2.055851135253906250e+02 -7.075000000000000000e+01 6.325000000000000000e+01
1.000000000000000000e+00 4.188384615384615017e+02 1.987707977294921875e+02 -1.039025878906250000e+01 9.877899289131164551e-01 0.000000000000000000e+00 4.765053405761718750e+02 5.317100882530212402e-01 1.000000000000000000e+00 3.015953369140625000e+02 -7.025000000000000000e+01 6.325000000000000000e+01
1.000000000000000000e+00 4.295538461538462798e+02 2.021781768798828125e+02 -1.025817871093750000e+01 9.873998165130615234e-01 0.000000000000000000e+00 4.775841674804687500e+02 5.153543353080749512e-01 1.000000000000000000e+00 3.068948364257812500e+02 -6.975000000000000000e+01 6.325000000000000000e+01
0.000000000000000000e+00 4.467615384615385210e+02 2.063313446044921875e+02 -1.016064453125000000e+01 9.950581192970275879e-01 0.000000000000000000e+00 4.742696838378906250e+02 4.953849315643310547e-01 1.000000000000000000e+00 4.613618469238281250e+02 -6.925000000000000000e+01 6.325000000000000000e+01
1.000000000000000000e+00 4.599384615384615245e+02 2.095890197753906250e+02 -1.016668701171875000e+01 9.953714013099670410e-01 0.000000000000000000e+00 4.577751464843750000e+02 5.137925744056701660e-01 1.000000000000000000e+00 6.126188354492187500e+02 -6.875000000000000000e+01 6.325000000000000000e+01
0.000000000000000000e+00 4.475307692307691809e+02 2.007262268066406250e+02 -1.051153564453125000e+01 9.602610468864440918e-01 0.000000000000000000e+00 3.474079284667968750e+02 4.973716437816619873e-01 1.000000000000000000e+00 2.684724731445312500e+02 -6.625000000000000000e+01 6.325000000000000000e+01
0.000000000000000000e+00 4.737384615384614222e+02 1.959088287353515625e+02 -1.064340209960937500e+01 9.962488412857055664e-01 0.000000000000000000e+00 3.197555847167968750e+02 6.441572308540344238e-01 1.000000000000000000e+00 5.500269775390625000e+02 -6.575000000000000000e+01 6.325000000000000000e+01
0.000000000000000000e+00 1.163923076923076678e+03 3.873300170898437500e+02 -8.303619384765625000e+00 3.935678601264953613e-01 0.000000000000000000e+00 1.598835754394531250e+02 5.723337531089782715e-01 1.000000000000000000e+00 3.557687988281250000e+02 -5.025000000000000000e+01 6.325000000000000000e+01
1.000000000000000000e+00 1.141476923076922958e+03 3.897791442871093750e+02 -1.005355834960937500e+01 4.592722654342651367e-01 0.000000000000000000e+00 1.136224975585937500e+02 6.278028488159179688e-01 1.000000000000000000e+00 6.129178466796875000e+02 -4.975000000000000000e+01 6.325000000000000000e+01
0.000000000000000000e+00 2.494230769230769340e+02 1.684702453613281250e+02 -1.186062622070312500e+01 9.919013381004333496e-01 0.000000000000000000e+00 9.351578369140625000e+02 8.749989271163940430e-01 1.000000000000000000e+00 1.554280395507812500e+02 -9.975000000000000000e+01 6.375000000000000000e+01
1.000000000000000000e+00 2.580615384615384755e+02 1.666688079833984375e+02 -1.186743164062500000e+01 9.939998984336853027e-01 0.000000000000000000e+00 9.446519165039062500e+02 1.006609797477722168e+00 1.000000000000000000e+00 1.507947998046875000e+02 -9.825000000000000000e+01 6.375000000000000000e+01
3.000000000000000000e+00 2.615923076923076565e+02 1.677961578369140625e+02 -1.186840820312500000e+01 9.949795007705688477e-01 0.000000000000000000e+00 9.465090332031250000e+02 1.006076931953430176e+00 1.000000000000000000e+00 1.512042541503906250e+02 -9.775000000000000000e+01 6.375000000000000000e+01
0.000000000000000000e+00 2.638230769230768828e+02 1.683524780273437500e+02 -1.187405395507812500e+01 9.943412542343139648e-01 0.000000000000000000e+00 9.449770507812500000e+02 9.539309740066528320e-01 1.000000000000000000e+00 1.063572082519531250e+02 -9.725000000000000000e+01 6.375000000000000000e+01
5.000000000000000000e+00 2.685461538461539135e+02 1.686623687744140625e+02 -1.188433837890625000e+01 9.943355917930603027e-01 0.000000000000000000e+00 9.400560302734375000e+02 9.532009363174438477e-01 1.000000000000000000e+00 9.003630828857421875e+01 -9.675000000000000000e+01 6.375000000000000000e+01
1.100000000000000000e+01 2.782538461538461547e+02 1.692221832275390625e+02 -1.189462280273437500e+01 9.959452152252197266e-01 0.000000000000000000e+00 9.351350097656250000e+02 9.988960027694702148e-01 2.000000000000000000e+00 1.271966934204101562e+02 -9.625000000000000000e+01 6.375000000000000000e+01
6.000000000000000000e+00 2.813230769230768828e+02 1.704654846191406250e+02 -1.190490722656250000e+01 9.944992065429687500e-01 0.000000000000000000e+00 9.302139892578125000e+02 9.724697470664978027e-01 1.000000000000000000e+00 2.864716339111328125e+01 -9.575000000000000000e+01 6.375000000000000000e+01
9.000000000000000000e+00 2.735307692307691809e+02 1.753181915283203125e+02 -1.192001342773437500e+01 9.961866736412048340e-01 0.000000000000000000e+00 9.178403320312500000e+02 7.324207425117492676e-01 1.000000000000000000e+00 4.969306564331054688e+01 -9.475000000000000000e+01 6.375000000000000000e+01
5.000000000000000000e+00 2.685615384615384187e+02 1.779674682617187500e+02 -1.192718505859375000e+01 9.962921738624572754e-01 0.000000000000000000e+00 9.114727172851562500e+02 7.185626029968261719e-01 1.000000000000000000e+00 3.141204643249511719e+01 -9.425000000000000000e+01 6.375000000000000000e+01
1.000000000000000000e+00 2.645230769230768715e+02 1.814064178466796875e+02 -1.193438720703125000e+01 9.962788224220275879e-01 0.000000000000000000e+00 9.051051025390625000e+02 7.119065523147583008e-01 1.000000000000000000e+00 1.893321609497070312e+01 -9.375000000000000000e+01 6.375000000000000000e+01
0.000000000000000000e+00 2.637615384615384073e+02 1.854625091552734375e+02 -1.194259643554687500e+01 9.963731169700622559e-01 0.000000000000000000e+00 8.913731079101562500e+02 7.060814499855041504e-01 1.000000000000000000e+00 1.360509300231933594e+01 -9.325000000000000000e+01 6.375000000000000000e+01
1.000000000000000000e+00 2.650461538461538566e+02 1.887587280273437500e+02 -1.195080566406250000e+01 9.965296387672424316e-01 0.000000000000000000e+00 8.776411132812500000e+02 6.998492479324340820e-01 1.000000000000000000e+00 8.372666358947753906e+00 -9.275000000000000000e+01 6.375000000000000000e+01
6.000000000000000000e+00 3.106923076923075655e+02 1.950465545654296875e+02 -1.014773559570312500e+01 9.965779781341552734e-01 0.000000000000000000e+00 7.205036010742187500e+02 6.685720086097717285e-01 1.000000000000000000e+00 1.929831123352050781e+01 -8.475000000000000000e+01 6.375000000000000000e+01
7.000000000000000000e+00 3.110384615384616041e+02 1.957540435791015625e+02 -1.001394653320312500e+01 9.961180686950683594e-01 0.000000000000000000e+00 7.386467895507812500e+02 6.686730384826660156e-01 1.000000000000000000e+00 1.128204345703125000e+01 -8.425000000000000000e+01 6.375000000000000000e+01
3.000000000000000000e+00 3.823230769230767692e+02 2.145242614746093750e+02 -1.082330322265625000e+01 9.834724068641662598e-01 0.000000000000000000e+00 5.437452392578125000e+02 5.615689754486083984e-01 1.000000000000000000e+00 2.273637542724609375e+02 -7.125000000000000000e+01 6.375000000000000000e+01
3.000000000000000000e+00 4.030615384615383618e+02 2.151379699707031250e+02 -1.076196289062500000e+01 9.907139539718627930e-01 0.000000000000000000e+00 5.430937500000000000e+02 5.171662569046020508e-01 1.000000000000000000e+00 2.947675781250000000e+02 -7.075000000000000000e+01 6.375000000000000000e+01
0.000000000000000000e+00 4.292538461538461547e+02 2.171210021972656250e+02 -1.070065307617187500e+01 9.978489279747009277e-01 0.000000000000000000e+00 5.424421997070312500e+02 4.943259060382843018e-01 1.000000000000000000e+00 5.729607543945312500e+02 -7.025000000000000000e+01 6.375000000000000000e+01
1.000000000000000000e+00 4.334461538461538339e+02 2.205079803466796875e+02 -1.063931274414062500e+01 9.969406127929687500e-01 0.000000000000000000e+00 5.417906494140625000e+02 4.985434710979461670e-01 1.000000000000000000e+00 4.085082397460937500e+02 -6.975000000000000000e+01 6.375000000000000000e+01
0.000000000000000000e+00 4.305076923076921389e+02 2.239160156250000000e+02 -1.061618041992187500e+01 9.940252304077148438e-01 0.000000000000000000e+00 5.359534912109375000e+02 5.430072546005249023e-01 1.000000000000000000e+00 3.682934875488281250e+02 -6.925000000000000000e+01 6.375000000000000000e+01
1.000000000000000000e+00 4.188692307692309100e+02 2.286631622314453125e+02 -1.089056396484375000e+01 9.891825318336486816e-01 0.000000000000000000e+00 4.717713928222656250e+02 5.457344651222229004e-01 1.000000000000000000e+00 2.461235198974609375e+02 -6.775000000000000000e+01 6.375000000000000000e+01
0.000000000000000000e+00 4.419384615384614108e+02 2.242995910644531250e+02 -1.103585815429687500e+01 9.921242594718933105e-01 0.000000000000000000e+00 4.435190734863281250e+02 5.455864071846008301e-01 1.000000000000000000e+00 6.192857055664062500e+02 -6.725000000000000000e+01 6.375000000000000000e+01
0.000000000000000000e+00 4.552846153846155062e+02 2.204958190917968750e+02 -1.123495483398437500e+01 9.976860880851745605e-01 0.000000000000000000e+00 4.084084777832031250e+02 4.740906059741973877e-01 1.000000000000000000e+00 6.125894165039062500e+02 -6.675000000000000000e+01 6.375000000000000000e+01
0.000000000000000000e+00 4.576999999999999318e+02 2.153625030517578125e+02 -1.143405151367187500e+01 9.982858300209045410e-01 0.000000000000000000e+00 3.732979125976562500e+02 4.929746687412261963e-01 1.000000000000000000e+00 7.233585205078125000e+02 -6.625000000000000000e+01 6.375000000000000000e+01
0.000000000000000000e+00 1.149376923076922594e+03 3.946723632812500000e+02 -9.989288330078125000e+00 7.670364379882812500e-01 0.000000000000000000e+00 1.050397796630859375e+02 1.160924792289733887e+00 1.000000000000000000e+00 8.727281494140625000e+02 -5.025000000000000000e+01 6.375000000000000000e+01
0.000000000000000000e+00 2.318230769230769113e+02 1.635483703613281250e+02 -1.211111450195312500e+01 9.948314428329467773e-01 0.000000000000000000e+00 9.029886474609375000e+02 9.595091342926025391e-01 1.000000000000000000e+00 1.081280364990234375e+02 -9.975000000000000000e+01 6.425000000000000000e+01
0.000000000000000000e+00 2.517692307692307736e+02 1.684953308105468750e+02 -1.223483276367187500e+01 9.964865446090698242e-01 0.000000000000000000e+00 9.111152343750000000e+02 9.414418339729309082e-01 1.000000000000000000e+00 1.347801513671875000e+02 -9.775000000000000000e+01 6.425000000000000000e+01
0.000000000000000000e+00 2.711846153846154266e+02 1.671977996826171875e+02 -1.232476806640625000e+01 9.963844418525695801e-01 0.000000000000000000e+00 9.042272949218750000e+02 7.785477042198181152e-01 1.000000000000000000e+00 3.618294906616210938e+01 -9.675000000000000000e+01 6.425000000000000000e+01
1.100000000000000000e+01 2.625384615384615472e+02 1.906387481689453125e+02 -1.273251342773437500e+01 9.986523985862731934e-01 0.000000000000000000e+00 8.099191284179687500e+02 6.592676639556884766e-01 2.000000000000000000e+00 8.111943817138671875e+01 -9.175000000000000000e+01 6.425000000000000000e+01
1.200000000000000000e+01 2.647615384615385210e+02 1.932867431640625000e+02 -1.270248413085937500e+01 9.990818500518798828e-01 0.000000000000000000e+00 7.658670043945312500e+02 6.566105484962463379e-01 2.000000000000000000e+00 1.520737152099609375e+02 -9.125000000000000000e+01 6.425000000000000000e+01
2.000000000000000000e+01 2.606615384615384983e+02 1.948091125488281250e+02 -1.267245483398437500e+01 9.986261129379272461e-01 0.000000000000000000e+00 7.218148193359375000e+02 6.577077507972717285e-01 3.000000000000000000e+00 6.169763565063476562e+01 -9.075000000000000000e+01 6.425000000000000000e+01
3.000000000000000000e+00 2.703769230769230489e+02 1.947414855957031250e+02 -1.248608398437500000e+01 9.990921020507812500e-01 0.000000000000000000e+00 6.376932373046875000e+02 6.587889790534973145e-01 1.000000000000000000e+00 1.258660049438476562e+02 -8.925000000000000000e+01 6.425000000000000000e+01
1.000000000000000000e+00 2.761769230769231740e+02 1.935480804443359375e+02 -1.137222290039062500e+01 9.981051087379455566e-01 0.000000000000000000e+00 5.595565185546875000e+02 6.715961694717407227e-01 1.000000000000000000e+00 6.383124923706054688e+01 -8.575000000000000000e+01 6.425000000000000000e+01
1.000000000000000000e+00 2.796846153846153129e+02 1.950577545166015625e+02 -1.110910034179687500e+01 9.979240298271179199e-01 0.000000000000000000e+00 6.205519409179687500e+02 6.607663631439208984e-01 1.000000000000000000e+00 5.361752319335937500e+01 -8.525000000000000000e+01 6.425000000000000000e+01
3.000000000000000000e+00 2.923615384615384869e+02 1.958018341064453125e+02 -1.084597778320312500e+01 9.982729554176330566e-01 0.000000000000000000e+00 6.815473632812500000e+02 6.423332095146179199e-01 1.000000000000000000e+00 8.496480560302734375e+01 -8.475000000000000000e+01 6.425000000000000000e+01
4.000000000000000000e+00 3.146769230769232877e+02 1.961727600097656250e+02 -1.067245483398437500e+01 9.990867972373962402e-01 0.000000000000000000e+00 7.066539306640625000e+02 6.254791617393493652e-01 1.000000000000000000e+00 1.800831756591796875e+02 -8.425000000000000000e+01 6.425000000000000000e+01
7.000000000000000000e+00 3.133076923076922640e+02 1.963642730712890625e+02 -1.076763916015625000e+01 9.989496469497680664e-01 0.000000000000000000e+00 6.240938720703125000e+02 6.204733848571777344e-01 1.000000000000000000e+00 1.672304382324218750e+02 -8.375000000000000000e+01 6.425000000000000000e+01
2.000000000000000000e+00 3.164384615384615813e+02 1.965254364013671875e+02 -1.086285400390625000e+01 9.983968734741210938e-01 0.000000000000000000e+00 5.415338134765625000e+02 6.199055910110473633e-01 1.000000000000000000e+00 1.110782470703125000e+02 -8.325000000000000000e+01 6.425000000000000000e+01
0.000000000000000000e+00 3.308384615384615586e+02 1.971034088134765625e+02 -1.095803833007812500e+01 9.983566999435424805e-01 0.000000000000000000e+00 4.589737548828125000e+02 6.175890564918518066e-01 1.000000000000000000e+00 1.100303192138671875e+02 -8.275000000000000000e+01 6.425000000000000000e+01
2.000000000000000000e+00 3.440923076923075428e+02 1.990083770751953125e+02 -1.099987792968750000e+01 9.982547760009765625e-01 0.000000000000000000e+00 4.128550720214843750e+02 6.179879307746887207e-01 1.000000000000000000e+00 1.148179321289062500e+02 -8.225000000000000000e+01 6.425000000000000000e+01
7.000000000000000000e+00 3.721307692307692605e+02 2.316080474853515625e+02 -1.085562133789062500e+01 9.878657460212707520e-01 0.000000000000000000e+00 4.441160583496093750e+02 5.634088516235351562e-01 1.000000000000000000e+00 1.733727722167968750e+02 -7.225000000000000000e+01 6.425000000000000000e+01
1.500000000000000000e+01 3.804923076923077474e+02 2.270762786865234375e+02 -1.085186767578125000e+01 9.915329217910766602e-01 0.000000000000000000e+00 5.026783447265625000e+02 5.505242943763732910e-01 2.000000000000000000e+00 2.833456726074218750e+02 -7.175000000000000000e+01 6.425000000000000000e+01
6.000000000000000000e+00 3.837076923076923549e+02 2.246493530273437500e+02 -1.084814453125000000e+01 9.907942414283752441e-01 0.000000000000000000e+00 5.612406005859375000e+02 5.391688346862792969e-01 1.000000000000000000e+00 2.592325134277343750e+02 -7.125000000000000000e+01 6.425000000000000000e+01
1.000000000000000000e+00 3.933461538461536975e+02 2.234474029541015625e+02 -1.087838745117187500e+01 9.885262250900268555e-01 0.000000000000000000e+00 5.575779418945312500e+02 5.361923575401306152e-01 1.000000000000000000e+00 1.945473480224609375e+02 -7.075000000000000000e+01 6.425000000000000000e+01
0.000000000000000000e+00 3.874153846153845961e+02 2.249519195556640625e+02 -1.090863037109375000e+01 9.852414727210998535e-01 0.000000000000000000e+00 5.539152221679687500e+02 5.457931756973266602e-01 1.000000000000000000e+00 1.696995391845703125e+02 -7.025000000000000000e+01 6.425000000000000000e+01
1.000000000000000000e+00 3.931000000000001364e+02 2.296972656250000000e+02 -1.098535156250000000e+01 9.905049800872802734e-01 0.000000000000000000e+00 5.428614501953125000e+02 5.597008466720581055e-01 1.000000000000000000e+00 2.690505981445312500e+02 -6.925000000000000000e+01 6.425000000000000000e+01
1.000000000000000000e+00 4.048153846153846303e+02 2.316672668457031250e+02 -1.108065795898437500e+01 9.943113327026367188e-01 0.000000000000000000e+00 5.242850341796875000e+02 5.371631383895874023e-01 1.000000000000000000e+00 4.462713623046875000e+02 -6.875000000000000000e+01 6.425000000000000000e+01
1.000000000000000000e+00 4.281153846153845279e+02 2.313824462890625000e+02 -1.117593383789062500e+01 9.971975088119506836e-01 0.000000000000000000e+00 5.057085876464843750e+02 4.928984940052032471e-01 1.000000000000000000e+00 5.110696716308593750e+02 -6.825000000000000000e+01 6.425000000000000000e+01
1.000000000000000000e+00 4.298769230769230489e+02 2.316760864257812500e+02 -1.127124023437500000e+01 9.987046718597412109e-01 0.000000000000000000e+00 4.871321411132812500e+02 4.446379244327545166e-01 1.000000000000000000e+00 6.467578125000000000e+02 -6.775000000000000000e+01 6.425000000000000000e+01
0.000000000000000000e+00 4.242230769230769170e+02 2.301255950927734375e+02 -1.147454833984375000e+01 9.981195330619812012e-01 0.000000000000000000e+00 4.506387939453125000e+02 4.264948070049285889e-01 1.000000000000000000e+00 6.370490722656250000e+02 -6.725000000000000000e+01 6.425000000000000000e+01
0.000000000000000000e+00 4.220153846153847326e+02 2.213567047119140625e+02 -1.209732055664062500e+01 9.995278120040893555e-01 0.000000000000000000e+00 3.418182678222656250e+02 5.390610694885253906e-01 1.000000000000000000e+00 7.584247436523437500e+02 -6.625000000000000000e+01 6.425000000000000000e+01
2.300000000000000000e+01 9.578230769230764281e+02 3.870433654785156250e+02 -1.051757812500000000e+01 6.550560593605041504e-01 0.000000000000000000e+00 8.779871368408203125e+01 6.588120460510253906e-01 3.000000000000000000e+00 4.258481750488281250e+02 -5.025000000000000000e+01 6.425000000000000000e+01
1.100000000000000000e+01 9.065076923076923094e+02 3.861393737792968750e+02 -1.226290893554687500e+01 5.930132269859313965e-01 0.000000000000000000e+00 6.116227340698242188e+01 6.927404999732971191e-01 2.000000000000000000e+00 6.518035888671875000e+02 -4.975000000000000000e+01 6.425000000000000000e+01
0.000000000000000000e+00 2.172923076923077019e+02 1.622486724853515625e+02 -1.236123657226562500e+01 9.961672425270080566e-01 0.000000000000000000e+00 8.698975830078125000e+02 7.283094525337219238e-01 1.000000000000000000e+00 1.077359008789062500e+02 -9.975000000000000000e+01 6.475000000000000000e+01
4.000000000000000000e+00 2.199692307692307907e+02 1.635081329345703125e+02 -1.241336059570312500e+01 9.972019791603088379e-01 0.000000000000000000e+00 8.709063720703125000e+02 7.279325723648071289e-01 1.000000000000000000e+00 1.446055145263671875e+02 -9.925000000000000000e+01 6.475000000000000000e+01
0.000000000000000000e+00 2.304461538461538623e+02 1.662995605468750000e+02 -1.254211425781250000e+01 9.978911876678466797e-01 0.000000000000000000e+00 8.732491455078125000e+02 7.280386686325073242e-01 1.000000000000000000e+00 1.447938079833984375e+02 -9.825000000000000000e+01 6.475000000000000000e+01
3.000000000000000000e+00 2.372923076923077019e+02 1.657233734130859375e+02 -1.268362426757812500e+01 9.982155561447143555e-01 0.000000000000000000e+00 8.723516235351562500e+02 7.782927155494689941e-01 1.000000000000000000e+00 9.500122833251953125e+01 -9.725000000000000000e+01 6.475000000000000000e+01
4.000000000000000000e+00 2.471692307692308361e+02 1.658640289306640625e+02 -1.277346801757812500e+01 9.980080723762512207e-01 0.000000000000000000e+00 8.670424804687500000e+02 7.323047518730163574e-01 1.000000000000000000e+00 8.166837310791015625e+01 -9.675000000000000000e+01 6.475000000000000000e+01
0.000000000000000000e+00 2.560692307692307850e+02 1.672257232666015625e+02 -1.295315551757812500e+01 9.988353252410888672e-01 0.000000000000000000e+00 8.564241943359375000e+02 7.123177647590637207e-01 1.000000000000000000e+00 1.474876708984375000e+02 -9.575000000000000000e+01 6.475000000000000000e+01
6.000000000000000000e+00 2.547538461538460979e+02 1.686683959960937500e+02 -1.312310791015625000e+01 9.991386532783508301e-01 0.000000000000000000e+00 8.421847534179687500e+02 6.874572634696960449e-01 1.000000000000000000e+00 1.280037536621093750e+02 -9.475000000000000000e+01 6.475000000000000000e+01
6.000000000000000000e+00 2.538769230769231058e+02 1.716535797119140625e+02 -1.320739746093750000e+01 9.992617964744567871e-01 0.000000000000000000e+00 8.348063964843750000e+02 6.769974827766418457e-01 1.000000000000000000e+00 1.372564392089843750e+02 -9.425000000000000000e+01 6.475000000000000000e+01
0.000000000000000000e+00 2.515692307692308134e+02 1.804002838134765625e+02 -1.335925292968750000e+01 9.993684887886047363e-01 0.000000000000000000e+00 8.150020141601562500e+02 6.555308699607849121e-01 1.000000000000000000e+00 1.520082550048828125e+02 -9.325000000000000000e+01 6.475000000000000000e+01
0.000000000000000000e+00 2.548769230769231058e+02 1.846454467773437500e+02 -1.342684936523437500e+01 9.994350075721740723e-01 0.000000000000000000e+00 8.025759887695312500e+02 6.464769244194030762e-01 1.000000000000000000e+00 1.539476165771484375e+02 -9.275000000000000000e+01 6.475000000000000000e+01
0.000000000000000000e+00 2.548230769230769113e+02 1.875478515625000000e+02 -1.349441528320312500e+01 9.995025396347045898e-01 0.000000000000000000e+00 7.901499633789062500e+02 6.425445079803466797e-01 1.000000000000000000e+00 1.741085052490234375e+02 -9.225000000000000000e+01 6.475000000000000000e+01
4.000000000000000000e+00 2.531615384615384130e+02 1.896089172363281250e+02 -1.354580688476562500e+01 9.994880557060241699e-01 0.000000000000000000e+00 7.721678466796875000e+02 6.404651403427124023e-01 1.000000000000000000e+00 1.868000030517578125e+02 -9.175000000000000000e+01 6.475000000000000000e+01
1.100000000000000000e+01 2.550461538461538851e+02 1.909379119873046875e+02 -1.354870605468750000e+01 9.994481205940246582e-01 0.000000000000000000e+00 7.375173950195312500e+02 6.354839205741882324e-01 2.000000000000000000e+00 1.703811340332031250e+02 -9.125000000000000000e+01 6.475000000000000000e+01
0.000000000000000000e+00 2.603538461538461206e+02 1.919334259033203125e+02 -1.355163574218750000e+01 9.995144605636596680e-01 0.000000000000000000e+00 7.028669433593750000e+02 6.272926330566406250e-01 1.000000000000000000e+00 1.507880249023437500e+02 -9.075000000000000000e+01 6.475000000000000000e+01
4.000000000000000000e+00 2.647769230769230830e+02 1.929334259033203125e+02 -1.355453491210937500e+01 9.994876980781555176e-01 0.000000000000000000e+00 6.682164916992187500e+02 6.172593235969543457e-01 1.000000000000000000e+00 1.641298980712890625e+02 -9.025000000000000000e+01 6.475000000000000000e+01
4.000000000000000000e+00 2.733846153846153584e+02 1.946228485107421875e+02 -1.350286865234375000e+01 9.996647834777832031e-01 0.000000000000000000e+00 6.458927612304687500e+02 6.072958111763000488e-01 1.000000000000000000e+00 2.231378936767578125e+02 -8.975000000000000000e+01 6.475000000000000000e+01
3.000000000000000000e+00 2.771307692307692605e+02 1.955772094726562500e+02 -1.339663696289062500e+01 9.997036457061767578e-01 0.000000000000000000e+00 6.358958129882812500e+02 6.030619144439697266e-01 1.000000000000000000e+00 2.362514495849609375e+02 -8.925000000000000000e+01 6.475000000000000000e+01
6.000000000000000000e+00 2.754923076923077474e+02 1.963111877441406250e+02 -1.329037475585937500e+01 9.997360110282897949e-01 0.000000000000000000e+00 6.258988647460937500e+02 6.098322868347167969e-01 1.000000000000000000e+00 2.232502136230468750e+02 -8.875000000000000000e+01 6.475000000000000000e+01
9.000000000000000000e+00 2.643076923076923208e+02 1.957259979248046875e+02 -1.318414306640625000e+01 9.994323849678039551e-01 0.000000000000000000e+00 6.159019165039062500e+02 6.246246695518493652e-01 1.000000000000000000e+00 1.518692932128906250e+02 -8.825000000000000000e+01 6.475000000000000000e+01
2.000000000000000000e+00 2.605692307692307850e+02 1.938139495849609375e+02 -1.225598144531250000e+01 9.986742138862609863e-01 0.000000000000000000e+00 4.895393676757812500e+02 6.541795134544372559e-01 1.000000000000000000e+00 4.133454513549804688e+01 -8.575000000000000000e+01 6.475000000000000000e+01
1.000000000000000000e+00 2.692769230769233673e+02 1.954781036376953125e+02 -1.193298339843750000e+01 9.988923668861389160e-01 0.000000000000000000e+00 5.624722290039062500e+02 6.368992328643798828e-01 1.000000000000000000e+00 6.718314361572265625e+01 -8.525000000000000000e+01 6.475000000000000000e+01
1.100000000000000000e+01 2.959307692307692719e+02 1.966156616210937500e+02 -1.160995483398437500e+01 9.992567896842956543e-01 0.000000000000000000e+00 6.354050903320312500e+02 6.047969460487365723e-01 2.000000000000000000e+00 1.434916076660156250e+02 -8.475000000000000000e+01 6.475000000000000000e+01
3.000000000000000000e+00 3.297000000000000455e+02 1.970355377197265625e+02 -1.139175415039062500e+01 9.997600913047790527e-01 0.000000000000000000e+00 6.677335205078125000e+02 5.704661011695861816e-01 1.000000000000000000e+00 3.069593505859375000e+02 -8.425000000000000000e+01 6.475000000000000000e+01
1.400000000000000000e+01 3.331076923076922185e+02 1.970789184570312500e+02 -1.148800659179687500e+01 9.997570514678955078e-01 0.000000000000000000e+00 5.782484741210937500e+02 5.523446798324584961e-01 2.000000000000000000e+00 3.377085571289062500e+02 -8.375000000000000000e+01 6.475000000000000000e+01
0.000000000000000000e+00 4.095153846153846189e+02 2.524798278808593750e+02 -1.131854248046875000e+01 9.970886111259460449e-01 0.000000000000000000e+00 3.146777038574218750e+02 5.556945800781250000e-01 1.000000000000000000e+00 1.527111816406250000e+02 -7.775000000000000000e+01 6.475000000000000000e+01
1.000000000000000000e+00 4.201461538461537657e+02 2.567247619628906250e+02 -1.124313354492187500e+01 9.978629350662231445e-01 0.000000000000000000e+00 3.080928649902343750e+02 5.451030731201171875e-01 1.000000000000000000e+00 2.596502380371093750e+02 -7.725000000000000000e+01 6.475000000000000000e+01
7.000000000000000000e+00 4.263076923076921503e+02 2.590873413085937500e+02 -1.117276000976562500e+01 9.956849813461303711e-01 0.000000000000000000e+00 3.018457946777343750e+02 5.451438426971435547e-01 1.000000000000000000e+00 1.580012207031250000e+02 -7.675000000000000000e+01 6.475000000000000000e+01
1.300000000000000000e+01 4.109461538461538339e+02 2.601883239746093750e+02 -1.111758422851562500e+01 9.942840933799743652e-01 0.000000000000000000e+00 2.966120300292968750e+02 5.630295276641845703e-01 2.000000000000000000e+00 1.093082885742187500e+02 -7.625000000000000000e+01 6.475000000000000000e+01
2.000000000000000000e+00 3.757538461538460410e+02 2.600682067871093750e+02 -1.100726318359375000e+01 9.868746995925903320e-01 0.000000000000000000e+00 2.861444702148437500e+02 5.960465073585510254e-01 1.000000000000000000e+00 8.476858139038085938e+00 -7.525000000000000000e+01 6.475000000000000000e+01
9.000000000000000000e+00 3.503307692307692491e+02 2.491060485839843750e+02 -1.081066894531250000e+01 9.879456758499145508e-01 0.000000000000000000e+00 3.787579345703125000e+02 5.940595269203186035e-01 1.000000000000000000e+00 9.591275787353515625e+01 -7.375000000000000000e+01 6.475000000000000000e+01
1.000000000000000000e+00 3.566846153846153697e+02 2.458351287841796875e+02 -1.074307250976562500e+01 9.874811768531799316e-01 0.000000000000000000e+00 4.168500671386718750e+02 5.781660676002502441e-01 1.000000000000000000e+00 1.280568389892578125e+02 -7.325000000000000000e+01 6.475000000000000000e+01
3.000000000000000000e+00 3.612076923076924118e+02 2.409219207763671875e+02 -1.075177001953125000e+01 9.858971238136291504e-01 0.000000000000000000e+00 4.554862060546875000e+02 5.640425086021423340e-01 1.000000000000000000e+00 1.903707580566406250e+02 -7.275000000000000000e+01 6.475000000000000000e+01
2.000000000000000000e+00 3.590538461538462798e+02 2.252212219238281250e+02 -1.110317993164062500e+01 9.867424964904785156e-01 0.000000000000000000e+00 5.582554321289062500e+02 5.708375573158264160e-01 1.000000000000000000e+00 1.524856567382812500e+02 -7.025000000000000000e+01 6.475000000000000000e+01
2.000000000000000000e+00 3.690230769230769852e+02 2.262306518554687500e+02 -1.122772216796875000e+01 9.900102019309997559e-01 0.000000000000000000e+00 5.514138793945312500e+02 5.579895973205566406e-01 1.000000000000000000e+00 2.506515960693359375e+02 -6.975000000000000000e+01 6.475000000000000000e+01
0.000000000000000000e+00 3.846923076923078497e+02 2.278527832031250000e+02 -1.134320068359375000e+01 9.954859614372253418e-01 0.000000000000000000e+00 5.425957031250000000e+02 5.397513508796691895e-01 1.000000000000000000e+00 3.624094848632812500e+02 -6.925000000000000000e+01 6.475000000000000000e+01
0.000000000000000000e+00 3.843230769230769965e+02 2.295944519042968750e+02 -1.143164062500000000e+01 9.973749518394470215e-01 0.000000000000000000e+00 5.278475341796875000e+02 5.166240334510803223e-01 1.000000000000000000e+00 5.017251586914062500e+02 -6.875000000000000000e+01 6.475000000000000000e+01
0.000000000000000000e+00 3.988461538461539817e+02 2.293941955566406250e+02 -1.152008056640625000e+01 9.979649186134338379e-01 0.000000000000000000e+00 5.130993652343750000e+02 4.800727665424346924e-01 1.000000000000000000e+00 5.359435424804687500e+02 -6.825000000000000000e+01 6.475000000000000000e+01
1.000000000000000000e+00 4.020538461538459956e+02 2.298886108398437500e+02 -1.160852050781250000e+01 9.990118145942687988e-01 0.000000000000000000e+00 4.983511962890625000e+02 4.541452825069427490e-01 1.000000000000000000e+00 5.859609985351562500e+02 -6.775000000000000000e+01 6.475000000000000000e+01
0.000000000000000000e+00 3.674461538461537202e+02 2.246557006835937500e+02 -1.229705810546875000e+01 9.941429495811462402e-01 0.000000000000000000e+00 3.780859985351562500e+02 4.722356200218200684e-01 1.000000000000000000e+00 2.058263549804687500e+02 -6.675000000000000000e+01 6.475000000000000000e+01
7.000000000000000000e+00 8.522615384615382936e+02 3.647719726562500000e+02 -1.258789062500000000e+01 7.515290975570678711e-01 0.000000000000000000e+00 5.300078964233398438e+01 7.517597079277038574e-01 1.000000000000000000e+00 7.267707519531250000e+02 -4.975000000000000000e+01 6.475000000000000000e+01
0.000000000000000000e+00 2.144923076923077474e+02 1.615797576904296875e+02 -1.261135864257812500e+01 9.983422160148620605e-01 0.000000000000000000e+00 8.368065795898437500e+02 6.796778440475463867e-01 1.000000000000000000e+00 1.758462371826171875e+02 -9.975000000000000000e+01 6.525000000000000000e+01
1.200000000000000000e+01 2.172538461538461547e+02 1.608923034667968750e+02 -1.268872070312500000e+01 9.986137747764587402e-01 0.000000000000000000e+00 8.352196655273437500e+02 6.836453676223754883e-01 2.000000000000000000e+00 1.666504669189453125e+02 -9.925000000000000000e+01 6.525000000000000000e+01
0.000000000000000000e+00 2.239384615384615813e+02 1.605794067382812500e+02 -1.278518676757812500e+01 9.989344477653503418e-01 0.000000000000000000e+00 8.360549926757812500e+02 6.829724907875061035e-01 1.000000000000000000e+00 1.892791595458984375e+02 -9.875000000000000000e+01 6.525000000000000000e+01
0.000000000000000000e+00 2.322000000000000171e+02 1.590927734375000000e+02 -1.297814941406250000e+01 9.991116523742675781e-01 0.000000000000000000e+00 8.377257690429687500e+02 6.818681359291076660e-01 1.000000000000000000e+00 1.524361114501953125e+02 -9.775000000000000000e+01 6.525000000000000000e+01
5.000000000000000000e+00 2.454461538461538623e+02 1.589419250488281250e+02 -1.322213745117187500e+01 9.993050098419189453e-01 0.000000000000000000e+00 8.298576049804687500e+02 6.839364171028137207e-01 1.000000000000000000e+00 1.514149322509765625e+02 -9.675000000000000000e+01 6.525000000000000000e+01
0.000000000000000000e+00 2.482692307692308020e+02 1.593002319335937500e+02 -1.335266113281250000e+01 9.994051456451416016e-01 0.000000000000000000e+00 8.243337402343750000e+02 6.841443777084350586e-01 1.000000000000000000e+00 1.324793090820312500e+02 -9.625000000000000000e+01 6.525000000000000000e+01
0.000000000000000000e+00 2.402846153846153641e+02 1.602024230957031250e+02 -1.348315429687500000e+01 9.993658065795898438e-01 0.000000000000000000e+00 8.188098754882812500e+02 6.822643280029296875e-01 1.000000000000000000e+00 1.338715820312500000e+02 -9.575000000000000000e+01 6.525000000000000000e+01
0.000000000000000000e+00 2.443999999999999773e+02 1.620250549316406250e+02 -1.360900878906250000e+01 9.995912313461303711e-01 0.000000000000000000e+00 8.114302368164062500e+02 6.740405559539794922e-01 1.000000000000000000e+00 1.808153839111328125e+02 -9.525000000000000000e+01 6.525000000000000000e+01
5.000000000000000000e+00 2.472692307692307736e+02 1.650508422851562500e+02 -1.373330688476562500e+01 9.995656609535217285e-01 0.000000000000000000e+00 8.034320678710937500e+02 6.588209867477416992e-01 1.000000000000000000e+00 1.558375244140625000e+02 -9.475000000000000000e+01 6.525000000000000000e+01
1.000000000000000000e+00 2.561538461538461320e+02 1.737809295654296875e+02 -1.398187255859375000e+01 9.997314810752868652e-01 0.000000000000000000e+00 7.874356079101562500e+02 6.260161995887756348e-01 1.000000000000000000e+00 1.845979919433593750e+02 -9.375000000000000000e+01 6.525000000000000000e+01
0.000000000000000000e+00 2.573999999999999773e+02 1.770462188720703125e+02 -1.408007812500000000e+01 9.998694062232971191e-01 0.000000000000000000e+00 7.749804687500000000e+02 6.117532253265380859e-01 1.000000000000000000e+00 2.887748413085937500e+02 -9.325000000000000000e+01 6.525000000000000000e+01
0.000000000000000000e+00 2.607769230769230262e+02 1.789802856445312500e+02 -1.417831420898437500e+01 9.998903274536132812e-01 0.000000000000000000e+00 7.625252685546875000e+02 5.993948578834533691e-01 1.000000000000000000e+00 2.836418762207031250e+02 -9.275000000000000000e+01 6.525000000000000000e+01
1.000000000000000000e+00 2.688615384615384869e+02 1.800087890625000000e+02 -1.427651977539062500e+01 9.998887777328491211e-01 0.000000000000000000e+00 7.500700683593750000e+02 5.898776650428771973e-01 1.000000000000000000e+00 2.928356933593750000e+02 -9.225000000000000000e+01 6.525000000000000000e+01
0.000000000000000000e+00 2.658461538461538680e+02 1.806057128906250000e+02 -1.435913085937500000e+01 9.998558163642883301e-01 0.000000000000000000e+00 7.344165039062500000e+02 5.835050344467163086e-01 1.000000000000000000e+00 2.704718322753906250e+02 -9.175000000000000000e+01 6.525000000000000000e+01
6.000000000000000000e+00 2.700538461538461092e+02 1.815802154541015625e+02 -1.439495849609375000e+01 9.998463392257690430e-01 0.000000000000000000e+00 7.091677856445312500e+02 5.782745480537414551e-01 1.000000000000000000e+00 2.648870849609375000e+02 -9.125000000000000000e+01 6.525000000000000000e+01
5.000000000000000000e+00 2.711307692307692605e+02 1.828463287353515625e+02 -1.443078613281250000e+01 9.998933076858520508e-01 0.000000000000000000e+00 6.839190673828125000e+02 5.731686949729919434e-01 1.000000000000000000e+00 3.081817626953125000e+02 -9.075000000000000000e+01 6.525000000000000000e+01
7.000000000000000000e+00 2.704692307692308191e+02 1.846666412353515625e+02 -1.446664428710937500e+01 9.998841881752014160e-01 0.000000000000000000e+00 6.586703491210937500e+02 5.707927346229553223e-01 1.000000000000000000e+00 3.042521667480468750e+02 -9.025000000000000000e+01 6.525000000000000000e+01
3.000000000000000000e+00 2.792692307692307736e+02 1.862118377685546875e+02 -1.442541503906250000e+01 9.998887777328491211e-01 0.000000000000000000e+00 6.420634155273437500e+02 5.770027041435241699e-01 1.000000000000000000e+00 3.151541442871093750e+02 -8.975000000000000000e+01 6.525000000000000000e+01
0.000000000000000000e+00 2.501230769230768374e+02 1.931993560791015625e+02 -1.313977050781250000e+01 9.993268251419067383e-01 0.000000000000000000e+00 4.195221862792968750e+02 6.428760886192321777e-01 1.000000000000000000e+00 5.979572296142578125e+01 -8.575000000000000000e+01 6.525000000000000000e+01
0.000000000000000000e+00 3.834153846153846530e+02 2.532940979003906250e+02 -1.130249023437500000e+01 9.948635101318359375e-01 0.000000000000000000e+00 2.953041381835937500e+02 5.766068696975708008e-01 1.000000000000000000e+00 2.670443916320800781e+01 -7.725000000000000000e+01 6.525000000000000000e+01
2.000000000000000000e+00 3.418846153846155289e+02 2.576711425781250000e+02 -1.084265136718750000e+01 9.879292845726013184e-01 0.000000000000000000e+00 3.186657409667968750e+02 5.987700819969177246e-01 1.000000000000000000e+00 5.807590961456298828e+00 -7.475000000000000000e+01 6.525000000000000000e+01
2.000000000000000000e+00 3.355384615384614904e+02 2.503488159179687500e+02 -1.068731689453125000e+01 9.865289330482482910e-01 0.000000000000000000e+00 4.370955200195312500e+02 5.872310400009155273e-01 1.000000000000000000e+00 2.082655906677246094e+01 -7.375000000000000000e+01 6.525000000000000000e+01
1.000000000000000000e+00 3.388538461538461206e+02 2.475827484130859375e+02 -1.060964965820312500e+01 9.890249371528625488e-01 0.000000000000000000e+00 4.963103942871093750e+02 5.785950422286987305e-01 1.000000000000000000e+00 8.527303314208984375e+01 -7.325000000000000000e+01 6.525000000000000000e+01
0.000000000000000000e+00 3.378307692307692491e+02 2.458872680664062500e+02 -1.064419555664062500e+01 9.874605536460876465e-01 0.000000000000000000e+00 5.254186401367187500e+02 5.711441040039062500e-01 1.000000000000000000e+00 7.946653747558593750e+01 -7.275000000000000000e+01 6.525000000000000000e+01
2.000000000000000000e+00 3.400923076923077701e+02 2.260645141601562500e+02 -1.107891845703125000e+01 9.894917011260986328e-01 0.000000000000000000e+00 5.726160888671875000e+02 5.655727386474609375e-01 1.000000000000000000e+00 1.571985321044921875e+02 -7.075000000000000000e+01 6.525000000000000000e+01
0.000000000000000000e+00 3.526000000000000796e+02 2.237601623535156250e+02 -1.129772949218750000e+01 9.950600862503051758e-01 0.000000000000000000e+00 5.625957031250000000e+02 5.488947629928588867e-01 1.000000000000000000e+00 3.164679870605468750e+02 -7.025000000000000000e+01 6.525000000000000000e+01
0.000000000000000000e+00 3.658076923076923208e+02 2.246299133300781250e+02 -1.170108032226562500e+01 9.971028566360473633e-01 0.000000000000000000e+00 5.423298950195312500e+02 5.274072289466857910e-01 1.000000000000000000e+00 3.843536376953125000e+02 -6.925000000000000000e+01 6.525000000000000000e+01
1.000000000000000000e+00 3.616692307692307509e+02 2.246197357177734375e+02 -1.178265380859375000e+01 9.953390359878540039e-01 0.000000000000000000e+00 5.314100341796875000e+02 5.279295444488525391e-01 1.000000000000000000e+00 3.323770751953125000e+02 -6.875000000000000000e+01 6.525000000000000000e+01
0.000000000000000000e+00 3.501692307692308077e+02 2.233144836425781250e+02 -1.186422729492187500e+01 9.972928762435913086e-01 0.000000000000000000e+00 5.204901123046875000e+02 5.285498499870300293e-01 1.000000000000000000e+00 4.109219055175781250e+02 -6.825000000000000000e+01 6.525000000000000000e+01
0.000000000000000000e+00 3.378307692307690218e+02 2.215099945068359375e+02 -1.194580078125000000e+01 9.958248138427734375e-01 0.000000000000000000e+00 5.095702514648437500e+02 5.310432910919189453e-01 1.000000000000000000e+00 3.108456726074218750e+02 -6.775000000000000000e+01 6.525000000000000000e+01
0.000000000000000000e+00 8.666538461538458478e+02 3.166776123046875000e+02 -7.215179443359375000e+00 5.665541887283325195e-01 0.000000000000000000e+00 1.665356597900390625e+02 6.669414043426513672e-01 1.000000000000000000e+00 5.199680175781250000e+02 -5.175000000000000000e+01 6.525000000000000000e+01
0.000000000000000000e+00 8.547076923076919002e+02 3.195606994628906250e+02 -8.470489501953125000e+00 4.958681166172027588e-01 0.000000000000000000e+00 1.267023544311523438e+02 6.786676049232482910e-01 1.000000000000000000e+00 4.047118835449218750e+02 -5.125000000000000000e+01 6.525000000000000000e+01
0.000000000000000000e+00 7.805384615384615472e+02 3.201134033203125000e+02 -9.725769042968750000e+00 6.033527851104736328e-01 0.000000000000000000e+00 8.686905670166015625e+01 6.864760518074035645e-01 1.000000000000000000e+00 5.660500488281250000e+02 -5.075000000000000000e+01 6.525000000000000000e+01
0.000000000000000000e+00 2.017230769230769738e+02 1.566593780517578125e+02 -1.297097778320312500e+01 9.991036057472229004e-01 0.000000000000000000e+00 7.993781127929687500e+02 6.619868278503417969e-01 1.000000000000000000e+00 1.520000000000000000e+02 -9.925000000000000000e+01 6.575000000000000000e+01
0.000000000000000000e+00 2.110230769230769283e+02 1.547244873046875000e+02 -1.322598266601562500e+01 9.993567466735839844e-01 0.000000000000000000e+00 7.999198608398437500e+02 6.602460145950317383e-01 1.000000000000000000e+00 1.426043548583984375e+02 -9.825000000000000000e+01 6.575000000000000000e+01
0.000000000000000000e+00 2.197846153846153925e+02 1.503354949951171875e+02 -1.350149536132812500e+01 9.995601177215576172e-01 0.000000000000000000e+00 7.974831542968750000e+02 6.617322564125061035e-01 1.000000000000000000e+00 1.514411010742187500e+02 -9.725000000000000000e+01 6.575000000000000000e+01
0.000000000000000000e+00 2.258692307692307395e+02 1.480993499755859375e+02 -1.367007446289062500e+01 9.994620084762573242e-01 0.000000000000000000e+00 7.917971801757812500e+02 6.626620888710021973e-01 1.000000000000000000e+00 1.120692520141601562e+02 -9.675000000000000000e+01 6.575000000000000000e+01
0.000000000000000000e+00 2.338076923076922640e+02 1.468472290039062500e+02 -1.383865356445312500e+01 9.996575117111206055e-01 0.000000000000000000e+00 7.861112060546875000e+02 6.623714566230773926e-01 1.000000000000000000e+00 1.343452758789062500e+02 -9.625000000000000000e+01 6.575000000000000000e+01
0.000000000000000000e+00 2.379153846153845961e+02 1.511700592041015625e+02 -1.417050170898437500e+01 9.997958540916442871e-01 0.000000000000000000e+00 7.726007080078125000e+02 6.425797343254089355e-01 1.000000000000000000e+00 2.023246765136718750e+02 -9.525000000000000000e+01 6.575000000000000000e+01
0.000000000000000000e+00 2.486615384615384983e+02 1.569325866699218750e+02 -1.433200073242187500e+01 9.998850822448730469e-01 0.000000000000000000e+00 7.640633544921875000e+02 6.226934790611267090e-01 1.000000000000000000e+00 2.711076049804687500e+02 -9.475000000000000000e+01 6.575000000000000000e+01
0.000000000000000000e+00 2.493307692307691639e+02 1.628224487304687500e+02 -1.449353027343750000e+01 9.999198913574218750e-01 0.000000000000000000e+00 7.555260620117187500e+02 6.074985265731811523e-01 1.000000000000000000e+00 3.000038146972656250e+02 -9.425000000000000000e+01 6.575000000000000000e+01
0.000000000000000000e+00 2.520307692307692378e+02 1.705225067138671875e+02 -1.478173828125000000e+01 9.999366998672485352e-01 0.000000000000000000e+00 7.345361938476562500e+02 5.861306190490722656e-01 1.000000000000000000e+00 3.108261108398437500e+02 -9.325000000000000000e+01 6.575000000000000000e+01
0.000000000000000000e+00 2.535692307692307281e+02 1.719378967285156250e+02 -1.490847778320312500e+01 9.999361038208007812e-01 0.000000000000000000e+00 7.220836791992187500e+02 5.777062773704528809e-01 1.000000000000000000e+00 3.056201171875000000e+02 -9.275000000000000000e+01 6.575000000000000000e+01
0.000000000000000000e+00 2.603846153846154152e+02 1.723060455322265625e+02 -1.503518676757812500e+01 9.999374151229858398e-01 0.000000000000000000e+00 7.096311645507812500e+02 5.733180642127990723e-01 1.000000000000000000e+00 3.031466064453125000e+02 -9.225000000000000000e+01 6.575000000000000000e+01
0.000000000000000000e+00 2.575692307692307850e+02 1.723899078369140625e+02 -1.514669799804687500e+01 9.999459385871887207e-01 0.000000000000000000e+00 6.962139282226562500e+02 5.740059018135070801e-01 1.000000000000000000e+00 3.146099243164062500e+02 -9.175000000000000000e+01 6.575000000000000000e+01
0.000000000000000000e+00 2.524461538461537771e+02 1.731307983398437500e+02 -1.521264648437500000e+01 9.999388456344604492e-01 0.000000000000000000e+00 6.799024658203125000e+02 5.749225020408630371e-01 1.000000000000000000e+00 3.109651794433593750e+02 -9.125000000000000000e+01 6.575000000000000000e+01
0.000000000000000000e+00 2.556076923076922469e+02 1.746160736083984375e+02 -1.527859497070312500e+01 9.998941421508789062e-01 0.000000000000000000e+00 6.635910644531250000e+02 5.749270915985107422e-01 1.000000000000000000e+00 2.293371276855468750e+02 -9.075000000000000000e+01 6.575000000000000000e+01
5.000000000000000000e+00 2.556846153846153982e+02 1.771259765625000000e+02 -1.534451293945312500e+01 9.999446868896484375e-01 0.000000000000000000e+00 6.472796630859375000e+02 5.812279582023620605e-01 1.000000000000000000e+00 2.702900695800781250e+02 -9.025000000000000000e+01 6.575000000000000000e+01
3.000000000000000000e+00 2.467923076923077019e+02 1.835402069091796875e+02 -1.492944335937500000e+01 9.998372197151184082e-01 0.000000000000000000e+00 6.178771362304687500e+02 5.923627018928527832e-01 1.000000000000000000e+00 1.877382965087890625e+02 -8.825000000000000000e+01 6.575000000000000000e+01
7.000000000000000000e+00 2.412461538461537600e+02 1.870614776611328125e+02 -1.468130493164062500e+01 9.997947812080383301e-01 0.000000000000000000e+00 4.514695129394531250e+02 6.032689213752746582e-01 1.000000000000000000e+00 1.318199920654296875e+02 -8.725000000000000000e+01 6.575000000000000000e+01
1.000000000000000000e+00 3.251769230769231172e+02 2.377482910156250000e+02 -1.067089843750000000e+01 9.921616315841674805e-01 0.000000000000000000e+00 5.856215820312500000e+02 5.700931549072265625e-01 1.000000000000000000e+00 1.550684814453125000e+02 -7.225000000000000000e+01 6.575000000000000000e+01
0.000000000000000000e+00 3.248615384615383732e+02 2.317719421386718750e+02 -1.077859497070312500e+01 9.894272685050964355e-01 0.000000000000000000e+00 5.877424926757812500e+02 5.688166022300720215e-01 1.000000000000000000e+00 7.456381225585937500e+01 -7.175000000000000000e+01 6.575000000000000000e+01
0.000000000000000000e+00 3.205846153846152902e+02 2.252522125244140625e+02 -1.088629150390625000e+01 9.899773001670837402e-01 0.000000000000000000e+00 5.898634033203125000e+02 5.670360326766967773e-01 1.000000000000000000e+00 7.648500823974609375e+01 -7.125000000000000000e+01 6.575000000000000000e+01
0.000000000000000000e+00 3.203615384615383732e+02 2.205290832519531250e+02 -1.119506835937500000e+01 9.918469190597534180e-01 0.000000000000000000e+00 5.768309936523437500e+02 5.621665716171264648e-01 1.000000000000000000e+00 1.572789001464843750e+02 -7.075000000000000000e+01 6.575000000000000000e+01
0.000000000000000000e+00 3.283923076923075541e+02 2.184552764892578125e+02 -1.150384521484375000e+01 9.924343228340148926e-01 0.000000000000000000e+00 5.637985839843750000e+02 5.493722558021545410e-01 1.000000000000000000e+00 1.621366424560546875e+02 -7.025000000000000000e+01 6.575000000000000000e+01
0.000000000000000000e+00 3.414846153846154948e+02 2.174130706787109375e+02 -1.181262207031250000e+01 9.941408634185791016e-01 0.000000000000000000e+00 5.507661743164062500e+02 5.299397110939025879e-01 1.000000000000000000e+00 2.123970336914062500e+02 -6.975000000000000000e+01 6.575000000000000000e+01
1.000000000000000000e+00 3.445307692307691809e+02 2.166882476806640625e+02 -1.206564331054687500e+01 9.957410693168640137e-01 0.000000000000000000e+00 5.389634399414062500e+02 5.237284898757934570e-01 1.000000000000000000e+00 2.495742492675781250e+02 -6.925000000000000000e+01 6.575000000000000000e+01
0.000000000000000000e+00 3.389384615384614108e+02 2.156368560791015625e+02 -1.215142822265625000e+01 9.962917566299438477e-01 0.000000000000000000e+00 5.308496093750000000e+02 5.315387248992919922e-01 1.000000000000000000e+00 2.934407653808593750e+02 -6.875000000000000000e+01 6.575000000000000000e+01
0.000000000000000000e+00 3.178307692307692491e+02 2.138557434082031250e+02 -1.223721313476562500e+01 9.909114837646484375e-01 0.000000000000000000e+00 5.227358398437500000e+02 5.469815731048583984e-01 1.000000000000000000e+00 1.399549713134765625e+02 -6.825000000000000000e+01 6.575000000000000000e+01
0.000000000000000000e+00 3.075461538461539135e+02 1.893889465332031250e+02 -1.416326904296875000e+01 9.969742894172668457e-01 0.000000000000000000e+00 2.012322082519531250e+02 4.789445996284484863e-01 1.000000000000000000e+00 3.647133178710937500e+02 -6.475000000000000000e+01 6.575000000000000000e+01
0.000000000000000000e+00 3.569692307692305917e+02 1.874262542724609375e+02 -1.380014038085937500e+01 9.999473094940185547e-01 0.000000000000000000e+00 2.683318176269531250e+02 6.341724991798400879e-01 1.000000000000000000e+00 7.547958984375000000e+02 -6.425000000000000000e+01 6.575000000000000000e+01
0.000000000000000000e+00 7.543384615384615017e+02 2.546523437500000000e+02 -7.924438476562500000e+00 7.456190586090087891e-01 0.000000000000000000e+00 1.167722930908203125e+02 1.389147996902465820e+00 1.000000000000000000e+00 7.433062133789062500e+02 -5.175000000000000000e+01 6.575000000000000000e+01
0.000000000000000000e+00 1.844538461538461718e+02 1.546824340820312500e+02 -1.322546386718750000e+01 9.994691014289855957e-01 0.000000000000000000e+00 7.676062011718750000e+02 6.301330924034118652e-01 1.000000000000000000e+00 1.813965454101562500e+02 -9.975000000000000000e+01 6.625000000000000000e+01
0.000000000000000000e+00 1.882769230769230262e+02 1.537805480957031250e+02 -1.333816528320312500e+01 9.995065927505493164e-01 0.000000000000000000e+00 7.616274414062500000e+02 6.364160776138305664e-01 1.000000000000000000e+00 1.521532135009765625e+02 -9.925000000000000000e+01 6.625000000000000000e+01
6.000000000000000000e+00 1.935846153846153470e+02 1.530873107910156250e+02 -1.348342895507812500e+01 9.995914697647094727e-01 0.000000000000000000e+00 7.585154418945312500e+02 6.373866200447082520e-01 1.000000000000000000e+00 1.523468475341796875e+02 -9.875000000000000000e+01 6.625000000000000000e+01
0.000000000000000000e+00 2.045153846153845905e+02 1.471553802490234375e+02 -1.393392944335937500e+01 9.997308850288391113e-01 0.000000000000000000e+00 7.481361083984375000e+02 6.396880745887756348e-01 1.000000000000000000e+00 1.429240417480468750e+02 -9.725000000000000000e+01 6.625000000000000000e+01
0.000000000000000000e+00 2.078769230769230489e+02 1.440280609130859375e+02 -1.410861206054687500e+01 9.998074769973754883e-01 0.000000000000000000e+00 7.429371337890625000e+02 6.391969919204711914e-01 1.000000000000000000e+00 1.389323425292968750e+02 -9.675000000000000000e+01 6.625000000000000000e+01
0.000000000000000000e+00 2.176615384615384130e+02 1.417996368408203125e+02 -1.428329467773437500e+01 9.998176097869873047e-01 0.000000000000000000e+00 7.377381591796875000e+02 6.372637152671813965e-01 1.000000000000000000e+00 1.190537567138671875e+02 -9.625000000000000000e+01 6.625000000000000000e+01
0.000000000000000000e+00 2.170769230769230660e+02 1.419666748046875000e+02 -1.445800781250000000e+01 9.998474717140197754e-01 0.000000000000000000e+00 7.325392456054687500e+02 6.311641335487365723e-01 1.000000000000000000e+00 1.518310852050781250e+02 -9.575000000000000000e+01 6.625000000000000000e+01
0.000000000000000000e+00 2.200615384615384755e+02 1.456786041259765625e+02 -1.462493896484375000e+01 9.998754262924194336e-01 0.000000000000000000e+00 7.251787109375000000e+02 6.180800795555114746e-01 1.000000000000000000e+00 1.642835083007812500e+02 -9.525000000000000000e+01 6.625000000000000000e+01
0.000000000000000000e+00 2.361153846153846416e+02 1.523042297363281250e+02 -1.478930664062500000e+01 9.999613165855407715e-01 0.000000000000000000e+00 7.170977172851562500e+02 6.005284190177917480e-01 1.000000000000000000e+00 3.154831848144531250e+02 -9.475000000000000000e+01 6.625000000000000000e+01
0.000000000000000000e+00 2.400461538461537998e+02 1.589496917724609375e+02 -1.495364379882812500e+01 9.999607801437377930e-01 0.000000000000000000e+00 7.090166625976562500e+02 5.845966935157775879e-01 1.000000000000000000e+00 3.029255371093750000e+02 -9.425000000000000000e+01 6.625000000000000000e+01
0.000000000000000000e+00 2.558230769230769113e+02 1.667909393310546875e+02 -1.524694824218750000e+01 9.999758005142211914e-01 0.000000000000000000e+00 6.888783569335937500e+02 5.608254671096801758e-01 1.000000000000000000e+00 3.315271301269531250e+02 -9.325000000000000000e+01 6.625000000000000000e+01
0.000000000000000000e+00 2.571846153846154266e+02 1.690663909912109375e+02 -1.537591552734375000e+01 9.999794363975524902e-01 0.000000000000000000e+00 6.768210449218750000e+02 5.580950379371643066e-01 1.000000000000000000e+00 3.453785400390625000e+02 -9.275000000000000000e+01 6.625000000000000000e+01
0.000000000000000000e+00 2.399692307692307907e+02 1.689241333007812500e+02 -1.561691284179687500e+01 9.999673366546630859e-01 0.000000000000000000e+00 6.524451904296875000e+02 5.659798383712768555e-01 1.000000000000000000e+00 3.069432373046875000e+02 -9.175000000000000000e+01 6.625000000000000000e+01
0.000000000000000000e+00 2.449000000000000625e+02 1.680276031494140625e+02 -1.567813110351562500e+01 9.999663233757019043e-01 0.000000000000000000e+00 6.393431396484375000e+02 5.605633854866027832e-01 1.000000000000000000e+00 3.066376647949218750e+02 -9.125000000000000000e+01 6.625000000000000000e+01
0.000000000000000000e+00 2.563692307692307395e+02 1.682736816406250000e+02 -1.573931884765625000e+01 9.999633431434631348e-01 0.000000000000000000e+00 6.262410888671875000e+02 5.506176948547363281e-01 1.000000000000000000e+00 2.811938781738281250e+02 -9.075000000000000000e+01 6.625000000000000000e+01
0.000000000000000000e+00 2.624923076923076337e+02 1.698604736328125000e+02 -1.580050659179687500e+01 9.999712109565734863e-01 0.000000000000000000e+00 6.131389770507812500e+02 5.431469678878784180e-01 1.000000000000000000e+00 3.355443420410156250e+02 -9.025000000000000000e+01 6.625000000000000000e+01
2.000000000000000000e+00 2.557307692307692264e+02 1.728118743896484375e+02 -1.577609252929687500e+01 9.999790787696838379e-01 0.000000000000000000e+00 6.036524047851562500e+02 5.402680635452270508e-01 1.000000000000000000e+00 3.907617797851562500e+02 -8.975000000000000000e+01 6.625000000000000000e+01
9.000000000000000000e+00 2.644153846153845961e+02 1.753846282958984375e+02 -1.566607666015625000e+01 9.999698996543884277e-01 0.000000000000000000e+00 5.977813720703125000e+02 5.396563410758972168e-01 1.000000000000000000e+00 3.310527648925781250e+02 -8.925000000000000000e+01 6.625000000000000000e+01
3.000000000000000000e+00 2.596384615384615699e+02 1.766962585449218750e+02 -1.555606079101562500e+01 9.999608993530273438e-01 0.000000000000000000e+00 5.919102783203125000e+02 5.402866601943969727e-01 1.000000000000000000e+00 3.016354064941406250e+02 -8.875000000000000000e+01 6.625000000000000000e+01
0.000000000000000000e+00 2.528384615384615870e+02 1.782124023437500000e+02 -1.544604492187500000e+01 9.999585151672363281e-01 0.000000000000000000e+00 5.860391845703125000e+02 5.447297096252441406e-01 1.000000000000000000e+00 3.065000305175781250e+02 -8.825000000000000000e+01 6.625000000000000000e+01
1.000000000000000000e+00 2.311230769230769226e+02 1.822275543212890625e+02 -1.519976806640625000e+01 9.998677372932434082e-01 0.000000000000000000e+00 4.605271911621093750e+02 5.743900537490844727e-01 1.000000000000000000e+00 1.523846740722656250e+02 -8.725000000000000000e+01 6.625000000000000000e+01
6.000000000000000000e+00 2.199076923076924288e+02 1.852987670898437500e+02 -1.507476806640625000e+01 9.998388886451721191e-01 0.000000000000000000e+00 3.896447753906250000e+02 5.948089361190795898e-01 1.000000000000000000e+00 8.743248748779296875e+01 -8.675000000000000000e+01 6.625000000000000000e+01
0.000000000000000000e+00 3.007769230769230830e+02 2.319210662841796875e+02 -1.075854492187500000e+01 9.899730086326599121e-01 0.000000000000000000e+00 4.121617431640625000e+02 6.761200428009033203e-01 1.000000000000000000e+00 3.621587753295898438e+00 -7.375000000000000000e+01 6.625000000000000000e+01
1.000000000000000000e+00 2.999384615384614108e+02 2.271737060546875000e+02 -1.072918701171875000e+01 9.901806116104125977e-01 0.000000000000000000e+00 4.669987182617187500e+02 5.929534435272216797e-01 1.000000000000000000e+00 2.786257171630859375e+01 -7.325000000000000000e+01 6.625000000000000000e+01
0.000000000000000000e+00 2.941769230769230603e+02 2.111856079101562500e+02 -1.092715454101562500e+01 9.903544783592224121e-01 0.000000000000000000e+00 5.150405273437500000e+02 5.898127555847167969e-01 1.000000000000000000e+00 7.224367523193359375e+01 -7.225000000000000000e+01 6.625000000000000000e+01
0.000000000000000000e+00 2.950076923076923663e+02 2.081674499511718750e+02 -1.104449462890625000e+01 9.907275438308715820e-01 0.000000000000000000e+00 5.346591186523437500e+02 5.884420275688171387e-01 1.000000000000000000e+00 8.512837219238281250e+01 -7.175000000000000000e+01 6.625000000000000000e+01
0.000000000000000000e+00 2.866846153846154834e+02 2.011163940429687500e+02 -1.296600341796875000e+01 9.938194751739501953e-01 0.000000000000000000e+00 4.615227050781250000e+02 5.639957785606384277e-01 1.000000000000000000e+00 1.163451766967773438e+02 -6.825000000000000000e+01 6.625000000000000000e+01
0.000000000000000000e+00 3.007153846153846644e+02 1.861947784423828125e+02 -1.505877685546875000e+01 9.999887943267822266e-01 0.000000000000000000e+00 1.218930053710937500e+02 8.937596678733825684e-01 1.000000000000000000e+00 1.008756713867187500e+03 -6.525000000000000000e+01 6.625000000000000000e+01
0.000000000000000000e+00 4.041692307692306372e+02 1.809788665771484375e+02 -1.400024414062500000e+01 9.997150301933288574e-01 0.000000000000000000e+00 2.586706848144531250e+02 8.303436040878295898e-01 1.000000000000000000e+00 7.503832397460937500e+02 -6.375000000000000000e+01 6.625000000000000000e+01
1.000000000000000000e+01 6.424000000000002046e+02 1.867991943359375000e+02 -8.922027587890625000e+00 8.656728267669677734e-01 0.000000000000000000e+00 9.559290313720703125e+01 9.728268384933471680e-01 2.000000000000000000e+00 8.674647827148437500e+02 -5.125000000000000000e+01 6.625000000000000000e+01
2.000000000000000000e+00 6.561538461538461888e+02 1.804122314453125000e+02 -9.902038574218750000e+00 9.696903228759765625e-01 0.000000000000000000e+00 7.291798400878906250e+01 7.148868441581726074e-01 1.000000000000000000e+00 1.151882202148437500e+03 -5.075000000000000000e+01 6.625000000000000000e+01
1.000000000000000000e+00 1.728076923076923208e+02 1.569836273193359375e+02 -1.358154296875000000e+01 9.996854662895202637e-01 0.000000000000000000e+00 7.317075195312500000e+02 6.004980206489562988e-01 1.000000000000000000e+00 1.473348999023437500e+02 -9.975000000000000000e+01 6.675000000000000000e+01
0.000000000000000000e+00 1.723923076923076394e+02 1.560657958984375000e+02 -1.370535278320312500e+01 9.997044801712036133e-01 0.000000000000000000e+00 7.238767089843750000e+02 6.097446680068969727e-01 1.000000000000000000e+00 1.254916229248046875e+02 -9.925000000000000000e+01 6.675000000000000000e+01
0.000000000000000000e+00 1.767615384615384357e+02 1.546231842041015625e+02 -1.386837768554687500e+01 9.997656345367431641e-01 0.000000000000000000e+00 7.173818969726562500e+02 6.140070557594299316e-01 1.000000000000000000e+00 1.373968048095703125e+02 -9.875000000000000000e+01 6.675000000000000000e+01
0.000000000000000000e+00 1.823076923076923208e+02 1.521282806396484375e+02 -1.403137207031250000e+01 9.998021721839904785e-01 0.000000000000000000e+00 7.108871459960937500e+02 6.154873967170715332e-01 1.000000000000000000e+00 1.279890975952148438e+02 -9.825000000000000000e+01 6.675000000000000000e+01
0.000000000000000000e+00 1.883923076923076394e+02 1.458980712890625000e+02 -1.436633300781250000e+01 9.998598098754882812e-01 0.000000000000000000e+00 6.987890014648437500e+02 6.188092827796936035e-01 1.000000000000000000e+00 1.334790191650390625e+02 -9.725000000000000000e+01 6.675000000000000000e+01
0.000000000000000000e+00 1.929230769230769340e+02 1.438390960693359375e+02 -1.454714965820312500e+01 9.998687505722045898e-01 0.000000000000000000e+00 6.940770874023437500e+02 6.222348809242248535e-01 1.000000000000000000e+00 1.055000381469726562e+02 -9.675000000000000000e+01 6.675000000000000000e+01
0.000000000000000000e+00 1.956384615384615131e+02 1.433946533203125000e+02 -1.472796630859375000e+01 9.998309016227722168e-01 0.000000000000000000e+00 6.893651733398437500e+02 6.249899268150329590e-01 1.000000000000000000e+00 4.007853698730468750e+01 -9.625000000000000000e+01 6.675000000000000000e+01
0.000000000000000000e+00 2.020999999999999659e+02 1.485823364257812500e+02 -1.507940673828125000e+01 9.999198913574218750e-01 0.000000000000000000e+00 6.777567138671875000e+02 6.059277057647705078e-01 1.000000000000000000e+00 1.234491882324218750e+02 -9.525000000000000000e+01 6.675000000000000000e+01
0.000000000000000000e+00 2.247692307692307736e+02 1.544552612304687500e+02 -1.524658203125000000e+01 9.999750256538391113e-01 0.000000000000000000e+00 6.701320190429687500e+02 5.865768790245056152e-01 1.000000000000000000e+00 2.848308715820312500e+02 -9.475000000000000000e+01 6.675000000000000000e+01
0.000000000000000000e+00 2.287307692307692264e+02 1.601043243408203125e+02 -1.541375732421875000e+01 9.999809265136718750e-01 0.000000000000000000e+00 6.625073242187500000e+02 5.707724690437316895e-01 1.000000000000000000e+00 3.040000000000000000e+02 -9.425000000000000000e+01 6.675000000000000000e+01
0.000000000000000000e+00 2.278076923076923208e+02 1.647593078613281250e+02 -1.558096313476562500e+01 9.999819993972778320e-01 0.000000000000000000e+00 6.548826293945312500e+02 5.619259476661682129e-01 1.000000000000000000e+00 2.860227050781250000e+02 -9.375000000000000000e+01 6.675000000000000000e+01
0.000000000000000000e+00 2.344307692307692719e+02 1.682627410888671875e+02 -1.571218872070312500e+01 9.999852180480957031e-01 0.000000000000000000e+00 6.432204589843750000e+02 5.580130815505981445e-01 1.000000000000000000e+00 3.031607971191406250e+02 -9.325000000000000000e+01 6.675000000000000000e+01
0.000000000000000000e+00 2.256461538461538225e+02 1.710536193847656250e+02 -1.597460937500000000e+01 9.999474287033081055e-01 0.000000000000000000e+00 6.198962402343750000e+02 5.602052807807922363e-01 1.000000000000000000e+00 1.527985992431640625e+02 -9.225000000000000000e+01 6.675000000000000000e+01
0.000000000000000000e+00 2.398692307692307111e+02 1.707168273925781250e+02 -1.608712768554687500e+01 9.999736547470092773e-01 0.000000000000000000e+00 6.086764526367187500e+02 5.521013736724853516e-01 1.000000000000000000e+00 2.465403442382812500e+02 -9.175000000000000000e+01 6.675000000000000000e+01
0.000000000000000000e+00 2.428384615384615017e+02 1.711075592041015625e+02 -1.614358520507812500e+01 9.999820590019226074e-01 0.000000000000000000e+00 5.987837524414062500e+02 5.363807082176208496e-01 1.000000000000000000e+00 3.111690368652343750e+02 -9.125000000000000000e+01 6.675000000000000000e+01
0.000000000000000000e+00 2.611538461538461320e+02 1.722936706542968750e+02 -1.620004272460937500e+01 9.999903440475463867e-01 0.000000000000000000e+00 5.888910522460937500e+02 5.222474336624145508e-01 1.000000000000000000e+00 3.806852722167968750e+02 -9.075000000000000000e+01 6.675000000000000000e+01
0.000000000000000000e+00 2.642846153846153925e+02 1.741619110107421875e+02 -1.625650024414062500e+01 9.999893903732299805e-01 0.000000000000000000e+00 5.789983520507812500e+02 5.159336924552917480e-01 1.000000000000000000e+00 3.768375244140625000e+02 -9.025000000000000000e+01 6.675000000000000000e+01
0.000000000000000000e+00 2.555153846153845620e+02 1.752693176269531250e+02 -1.623870849609375000e+01 9.999855756759643555e-01 0.000000000000000000e+00 5.712161865234375000e+02 5.176094770431518555e-01 1.000000000000000000e+00 3.520237426757812500e+02 -8.975000000000000000e+01 6.675000000000000000e+01
4.000000000000000000e+00 2.471384615384615415e+02 1.739686584472656250e+02 -1.605465698242187500e+01 9.999837279319763184e-01 0.000000000000000000e+00 5.598728637695312500e+02 5.248969793319702148e-01 1.000000000000000000e+00 3.225098266601562500e+02 -8.875000000000000000e+01 6.675000000000000000e+01
0.000000000000000000e+00 2.391769230769230887e+02 1.768103790283203125e+02 -1.584472656250000000e+01 9.999790191650390625e-01 0.000000000000000000e+00 5.171268310546875000e+02 5.416521430015563965e-01 1.000000000000000000e+00 3.015817565917968750e+02 -8.775000000000000000e+01 6.675000000000000000e+01
5.000000000000000000e+00 2.204846153846152959e+02 1.794753875732421875e+02 -1.571823120117187500e+01 9.999342560768127441e-01 0.000000000000000000e+00 4.695848693847656250e+02 5.612995624542236328e-01 1.000000000000000000e+00 1.630361022949218750e+02 -8.725000000000000000e+01 6.675000000000000000e+01
9.000000000000000000e+00 2.093615384615383732e+02 1.827968750000000000e+02 -1.559176635742187500e+01 9.998447299003601074e-01 0.000000000000000000e+00 4.220428771972656250e+02 5.739678144454956055e-01 1.000000000000000000e+00 2.894087028503417969e+01 -8.675000000000000000e+01 6.675000000000000000e+01
6.000000000000000000e+00 2.116076923076923038e+02 1.875699768066406250e+02 -1.546527099609375000e+01 9.998949766159057617e-01 0.000000000000000000e+00 3.745008850097656250e+02 5.749239325523376465e-01 1.000000000000000000e+00 1.224891052246093750e+02 -8.625000000000000000e+01 6.675000000000000000e+01
3.000000000000000000e+00 2.289230769230769340e+02 2.037384033203125000e+02 -1.452169799804687500e+01 9.998818635940551758e-01 0.000000000000000000e+00 5.085782775878906250e+02 5.586912631988525391e-01 1.000000000000000000e+00 1.659131469726562500e+02 -8.475000000000000000e+01 6.675000000000000000e+01
4.000000000000000000e+00 2.441692307692308361e+02 2.084349822998046875e+02 -1.415753173828125000e+01 9.998657107353210449e-01 0.000000000000000000e+00 4.784549255371093750e+02 5.492461919784545898e-01 1.000000000000000000e+00 1.674775390625000000e+02 -8.375000000000000000e+01 6.675000000000000000e+01
1.200000000000000000e+01 2.616538461538462457e+02 2.094248046875000000e+02 -1.405490112304687500e+01 9.998983740806579590e-01 0.000000000000000000e+00 4.275407714843750000e+02 5.402749180793762207e-01 2.000000000000000000e+00 2.387803497314453125e+02 -8.325000000000000000e+01 6.675000000000000000e+01
2.000000000000000000e+00 2.721076923076922185e+02 2.095241851806640625e+02 -1.395227050781250000e+01 9.998626112937927246e-01 0.000000000000000000e+00 3.766265869140625000e+02 5.393192768096923828e-01 1.000000000000000000e+00 1.527520599365234375e+02 -8.275000000000000000e+01 6.675000000000000000e+01
6.000000000000000000e+00 2.770153846153846189e+02 1.740013732910156250e+02 -1.118344116210937500e+01 9.897313117980957031e-01 0.000000000000000000e+00 4.444594726562500000e+02 5.962495207786560059e-01 1.000000000000000000e+00 1.742399215698242188e+01 -7.225000000000000000e+01 6.675000000000000000e+01
0.000000000000000000e+00 2.740230769230768715e+02 1.828733062744140625e+02 -1.296063232421875000e+01 9.945625662803649902e-01 0.000000000000000000e+00 4.557420654296875000e+02 5.650689601898193359e-01 1.000000000000000000e+00 1.357487335205078125e+02 -6.925000000000000000e+01 6.675000000000000000e+01
0.000000000000000000e+00 2.668923076923076678e+02 1.863795471191406250e+02 -1.369479370117187500e+01 9.943028688430786133e-01 0.000000000000000000e+00 4.003095397949218750e+02 5.487277507781982422e-01 1.000000000000000000e+00 1.660363311767578125e+02 -6.825000000000000000e+01 6.675000000000000000e+01
0.000000000000000000e+00 2.614153846153845393e+02 1.869021606445312500e+02 -1.406188964843750000e+01 9.974095821380615234e-01 0.000000000000000000e+00 3.725932922363281250e+02 5.268942117691040039e-01 1.000000000000000000e+00 3.115669250488281250e+02 -6.775000000000000000e+01 6.675000000000000000e+01
0.000000000000000000e+00 2.493461538461538680e+02 1.864906463623046875e+02 -1.445913696289062500e+01 9.971997141838073730e-01 0.000000000000000000e+00 3.231157226562500000e+02 4.969844818115234375e-01 1.000000000000000000e+00 3.057669067382812500e+02 -6.725000000000000000e+01 6.675000000000000000e+01
0.000000000000000000e+00 2.588384615384615586e+02 1.860680847167968750e+02 -1.488653564453125000e+01 9.978532195091247559e-01 0.000000000000000000e+00 2.518768310546875000e+02 4.437125027179718018e-01 1.000000000000000000e+00 4.059280090332031250e+02 -6.675000000000000000e+01 6.675000000000000000e+01
4.000000000000000000e+00 2.939153846153845393e+02 1.819719848632812500e+02 -1.531393432617187500e+01 9.997874498367309570e-01 0.000000000000000000e+00 1.806379394531250000e+02 4.321034550666809082e-01 1.000000000000000000e+00 6.196408691406250000e+02 -6.625000000000000000e+01 6.675000000000000000e+01
0.000000000000000000e+00 3.163692307692307395e+02 1.756615142822265625e+02 -1.524862670898437500e+01 9.998007416725158691e-01 0.000000000000000000e+00 1.337389221191406250e+02 6.439141035079956055e-01 1.000000000000000000e+00 5.143120727539062500e+02 -6.475000000000000000e+01 6.675000000000000000e+01
0.000000000000000000e+00 3.371538461538463025e+02 1.743719635009765625e+02 -1.490600585937500000e+01 9.983711838722229004e-01 0.000000000000000000e+00 1.578244171142578125e+02 5.786372423171997070e-01 1.000000000000000000e+00 3.403414306640625000e+02 -6.425000000000000000e+01 6.675000000000000000e+01
0.000000000000000000e+00 3.340692307692307850e+02 1.720773315429687500e+02 -1.456341552734375000e+01 9.998794198036193848e-01 0.000000000000000000e+00 1.819098968505859375e+02 4.876982569694519043e-01 1.000000000000000000e+00 6.543724365234375000e+02 -6.375000000000000000e+01 6.675000000000000000e+01
0.000000000000000000e+00 3.756692307692309214e+02 1.694909515380859375e+02 -1.420571899414062500e+01 9.997188448905944824e-01 0.000000000000000000e+00 1.584856109619140625e+02 6.783842444419860840e-01 1.000000000000000000e+00 7.041245117187500000e+02 -6.325000000000000000e+01 6.675000000000000000e+01
0.000000000000000000e+00 5.276999999999998181e+02 1.659285736083984375e+02 -1.300424194335937500e+01 9.951544404029846191e-01 0.000000000000000000e+00 1.040090637207031250e+02 1.132126450538635254e+00 1.000000000000000000e+00 6.654951782226562500e+02 -6.175000000000000000e+01 6.675000000000000000e+01
2.300000000000000000e+01 5.055307692307691809e+02 1.592600708007812500e+02 -7.101867675781250000e+00 5.385009050369262695e-01 0.000000000000000000e+00 1.411954345703125000e+02 6.878998279571533203e-01 3.000000000000000000e+00 3.057070007324218750e+02 -5.225000000000000000e+01 6.675000000000000000e+01
2.000000000000000000e+00 4.672923076923077588e+02 1.456221771240234375e+02 -7.959594726562500000e+00 5.945122241973876953e-01 0.000000000000000000e+00 1.197633438110351562e+02 8.268858194351196289e-01 1.000000000000000000e+00 3.151839294433593750e+02 -5.175000000000000000e+01 6.675000000000000000e+01
7.000000000000000000e+00 4.252076923076924118e+02 1.342629089355468750e+02 -8.817291259765625000e+00 6.198919415473937988e-01 0.000000000000000000e+00 9.833126068115234375e+01 9.531635642051696777e-01 1.000000000000000000e+00 3.162964172363281250e+02 -5.125000000000000000e+01 6.675000000000000000e+01
6.000000000000000000e+00 3.514076923076924004e+02 1.274325256347656250e+02 -9.675018310546875000e+00 5.720639824867248535e-01 0.000000000000000000e+00 7.689917755126953125e+01 8.036207556724548340e-01 1.000000000000000000e+00 3.010971374511718750e+02 -5.075000000000000000e+01 6.675000000000000000e+01
1.000000000000000000e+00 4.134769230769231285e+02 1.251451721191406250e+02 -1.085787963867187500e+01 8.180699348449707031e-01 0.000000000000000000e+00 6.129829788208007812e+01 7.433747053146362305e-01 1.000000000000000000e+00 4.809039611816406250e+02 -5.025000000000000000e+01 6.675000000000000000e+01
0.000000000000000000e+00 1.579000000000000341e+02 1.708697814941406250e+02 -1.393759155273437500e+01 9.997548460960388184e-01 0.000000000000000000e+00 6.958087768554687500e+02 5.723260045051574707e-01 1.000000000000000000e+00 8.034126281738281250e+01 -9.975000000000000000e+01 6.725000000000000000e+01
0.000000000000000000e+00 1.563153846153846018e+02 1.709644165039062500e+02 -1.407254028320312500e+01 9.997977018356323242e-01 0.000000000000000000e+00 6.861259765625000000e+02 5.893744230270385742e-01 1.000000000000000000e+00 8.871721649169921875e+01 -9.925000000000000000e+01 6.725000000000000000e+01
0.000000000000000000e+00 1.578692307692307963e+02 1.697608795166015625e+02 -1.425329589843750000e+01 9.998368024826049805e-01 0.000000000000000000e+00 6.762484130859375000e+02 5.967973470687866211e-01 1.000000000000000000e+00 7.960044097900390625e+01 -9.875000000000000000e+01 6.725000000000000000e+01
0.000000000000000000e+00 1.636692307692307509e+02 1.622571716308593750e+02 -1.461486816406250000e+01 9.998864531517028809e-01 0.000000000000000000e+00 6.564932250976562500e+02 6.043819785118103027e-01 1.000000000000000000e+00 8.419026947021484375e+01 -9.775000000000000000e+01 6.725000000000000000e+01
0.000000000000000000e+00 1.900230769230768999e+02 1.622179260253906250e+02 -1.570388793945312500e+01 9.999708533287048340e-01 0.000000000000000000e+00 6.231663818359375000e+02 5.969852805137634277e-01 1.000000000000000000e+00 1.239662857055664062e+02 -9.475000000000000000e+01 6.725000000000000000e+01
0.000000000000000000e+00 2.007307692307692264e+02 1.645891571044921875e+02 -1.587390136718750000e+01 9.999688267707824707e-01 0.000000000000000000e+00 6.159979858398437500e+02 5.833191275596618652e-01 1.000000000000000000e+00 1.605079193115234375e+02 -9.425000000000000000e+01 6.725000000000000000e+01
0.000000000000000000e+00 2.003615384615385153e+02 1.660202484130859375e+02 -1.604391479492187500e+01 9.999811649322509766e-01 0.000000000000000000e+00 6.088295898437500000e+02 5.750091075897216797e-01 1.000000000000000000e+00 2.204722137451171875e+02 -9.375000000000000000e+01 6.725000000000000000e+01
0.000000000000000000e+00 2.009769230769230717e+02 1.679679870605468750e+02 -1.617739868164062500e+01 9.999774694442749023e-01 0.000000000000000000e+00 5.975626220703125000e+02 5.693218708038330078e-01 1.000000000000000000e+00 1.665420379638671875e+02 -9.325000000000000000e+01 6.725000000000000000e+01
0.000000000000000000e+00 2.141692307692307509e+02 1.701223907470703125e+02 -1.631085205078125000e+01 9.999930262565612793e-01 0.000000000000000000e+00 5.862956542968750000e+02 5.613331794738769531e-01 1.000000000000000000e+00 2.963647155761718750e+02 -9.275000000000000000e+01 6.725000000000000000e+01
0.000000000000000000e+00 2.194846153846154380e+02 1.702771453857421875e+02 -1.644433593750000000e+01 9.999818801879882812e-01 0.000000000000000000e+00 5.750287475585937500e+02 5.498648285865783691e-01 1.000000000000000000e+00 2.388253936767578125e+02 -9.225000000000000000e+01 6.725000000000000000e+01
0.000000000000000000e+00 2.339615384615384528e+02 1.695743560791015625e+02 -1.655734252929687500e+01 9.999914169311523438e-01 0.000000000000000000e+00 5.649077148437500000e+02 5.376468300819396973e-01 1.000000000000000000e+00 3.029461975097656250e+02 -9.175000000000000000e+01 6.725000000000000000e+01
0.000000000000000000e+00 2.339384615384615245e+02 1.715821075439453125e+02 -1.660906982421875000e+01 9.999899268150329590e-01 0.000000000000000000e+00 5.582243652343750000e+02 5.285168886184692383e-01 1.000000000000000000e+00 2.981862487792968750e+02 -9.125000000000000000e+01 6.725000000000000000e+01
0.000000000000000000e+00 2.388923076923076962e+02 1.753658752441406250e+02 -1.666076660156250000e+01 9.999923110008239746e-01 0.000000000000000000e+00 5.515410766601562500e+02 5.227290391921997070e-01 1.000000000000000000e+00 3.606670532226562500e+02 -9.075000000000000000e+01 6.725000000000000000e+01
1.000000000000000000e+00 2.408615384615385153e+02 1.792160186767578125e+02 -1.671249389648437500e+01 9.999886155128479004e-01 0.000000000000000000e+00 5.448577270507812500e+02 5.185400247573852539e-01 1.000000000000000000e+00 3.120677490234375000e+02 -9.025000000000000000e+01 6.725000000000000000e+01
0.000000000000000000e+00 2.462615384615384357e+02 1.810586242675781250e+02 -1.670132446289062500e+01 9.999887943267822266e-01 0.000000000000000000e+00 5.387799682617187500e+02 5.158913135528564453e-01 1.000000000000000000e+00 3.881537780761718750e+02 -8.975000000000000000e+01 6.725000000000000000e+01
0.000000000000000000e+00 2.433615384615384585e+02 1.825154418945312500e+02 -1.662728881835937500e+01 9.999879598617553711e-01 0.000000000000000000e+00 5.333077392578125000e+02 5.158598423004150391e-01 1.000000000000000000e+00 3.154700622558593750e+02 -8.925000000000000000e+01 6.725000000000000000e+01
4.000000000000000000e+00 2.344307692307691866e+02 1.824093475341796875e+02 -1.655322265625000000e+01 9.999770522117614746e-01 0.000000000000000000e+00 5.278355102539062500e+02 5.209276676177978516e-01 1.000000000000000000e+00 2.574653320312500000e+02 -8.875000000000000000e+01 6.725000000000000000e+01
6.000000000000000000e+00 2.312076923076923549e+02 1.813156433105468750e+02 -1.647918701171875000e+01 9.999835491180419922e-01 0.000000000000000000e+00 5.223632812500000000e+02 5.356280803680419922e-01 1.000000000000000000e+00 2.387407531738281250e+02 -8.825000000000000000e+01 6.725000000000000000e+01
0.000000000000000000e+00 2.065461538461537998e+02 1.809120483398437500e+02 -1.636468505859375000e+01 9.999356865882873535e-01 0.000000000000000000e+00 5.028440856933593750e+02 5.618202090263366699e-01 1.000000000000000000e+00 1.129470367431640625e+02 -8.775000000000000000e+01 6.725000000000000000e+01
1.200000000000000000e+01 2.112923076923075882e+02 1.880554199218750000e+02 -1.598077392578125000e+01 9.999482631683349609e-01 0.000000000000000000e+00 4.302394409179687500e+02 5.480771660804748535e-01 2.000000000000000000e+00 2.349670715332031250e+02 -8.625000000000000000e+01 6.725000000000000000e+01
2.000000000000000000e+00 2.201538461538461320e+02 1.998993377685546875e+02 -1.547106933593750000e+01 9.999501109123229980e-01 0.000000000000000000e+00 4.702555847167968750e+02 5.203078985214233398e-01 1.000000000000000000e+00 2.131062469482421875e+02 -8.525000000000000000e+01 6.725000000000000000e+01
1.700000000000000000e+01 2.240153846153845905e+02 2.048749694824218750e+02 -1.521621704101562500e+01 9.999531507492065430e-01 0.000000000000000000e+00 4.902636413574218750e+02 5.134518146514892578e-01 2.000000000000000000e+00 2.198064270019531250e+02 -8.475000000000000000e+01 6.725000000000000000e+01
9.000000000000000000e+00 2.415000000000000000e+02 2.086656036376953125e+02 -1.497518920898437500e+01 9.999648332595825195e-01 0.000000000000000000e+00 4.987943420410156250e+02 5.036960244178771973e-01 1.000000000000000000e+00 3.029996643066406250e+02 -8.425000000000000000e+01 6.725000000000000000e+01
6.000000000000000000e+00 2.586307692307693742e+02 2.116238403320312500e+02 -1.477572631835937500e+01 9.999765157699584961e-01 0.000000000000000000e+00 4.728929748535156250e+02 4.922769069671630859e-01 1.000000000000000000e+00 3.387244567871093750e+02 -8.375000000000000000e+01 6.725000000000000000e+01
3.000000000000000000e+00 2.733000000000000114e+02 2.137137298583984375e+02 -1.457626342773437500e+01 9.999766349792480469e-01 0.000000000000000000e+00 4.469916076660156250e+02 4.869903922080993652e-01 1.000000000000000000e+00 3.361820068359375000e+02 -8.325000000000000000e+01 6.725000000000000000e+01
2.000000000000000000e+00 2.826538461538461888e+02 2.145140838623046875e+02 -1.437680053710937500e+01 9.999473690986633301e-01 0.000000000000000000e+00 4.210902404785156250e+02 4.912307858467102051e-01 1.000000000000000000e+00 2.237936706542968750e+02 -8.275000000000000000e+01 6.725000000000000000e+01
0.000000000000000000e+00 2.558999999999999773e+02 1.454539184570312500e+02 -1.171289062500000000e+01 9.927010536193847656e-01 0.000000000000000000e+00 4.831064453125000000e+02 5.819575190544128418e-01 1.000000000000000000e+00 5.912973022460937500e+01 -7.125000000000000000e+01 6.725000000000000000e+01
0.000000000000000000e+00 2.645923076923077133e+02 1.493016967773437500e+02 -1.213110351562500000e+01 9.954938888549804688e-01 0.000000000000000000e+00 4.672142333984375000e+02 5.629437565803527832e-01 1.000000000000000000e+00 1.615431060791015625e+02 -7.075000000000000000e+01 6.725000000000000000e+01
0.000000000000000000e+00 2.667692307692306599e+02 1.536177978515625000e+02 -1.254931640625000000e+01 9.957588911056518555e-01 0.000000000000000000e+00 4.513220520019531250e+02 5.463764667510986328e-01 1.000000000000000000e+00 1.603458404541015625e+02 -7.025000000000000000e+01 6.725000000000000000e+01
0.000000000000000000e+00 2.750307692307692946e+02 1.575200347900390625e+02 -1.296752929687500000e+01 9.977996349334716797e-01 0.000000000000000000e+00 4.354298706054687500e+02 5.263134837150573730e-01 1.000000000000000000e+00 3.077595825195312500e+02 -6.975000000000000000e+01 6.725000000000000000e+01
0.000000000000000000e+00 2.732692307692307168e+02 1.625722656250000000e+02 -1.340811157226562500e+01 9.979628324508666992e-01 0.000000000000000000e+00 4.141313781738281250e+02 4.992036223411560059e-01 1.000000000000000000e+00 3.059662780761718750e+02 -6.925000000000000000e+01 6.725000000000000000e+01
0.000000000000000000e+00 2.885384615384614904e+02 1.675470886230468750e+02 -1.391586303710937500e+01 9.996779561042785645e-01 0.000000000000000000e+00 3.766138916015625000e+02 4.956601262092590332e-01 1.000000000000000000e+00 4.652062072753906250e+02 -6.875000000000000000e+01 6.725000000000000000e+01
0.000000000000000000e+00 2.956846153846154266e+02 1.721781311035156250e+02 -1.442358398437500000e+01 9.995045065879821777e-01 0.000000000000000000e+00 3.390964050292968750e+02 5.294788479804992676e-01 1.000000000000000000e+00 4.633370971679687500e+02 -6.825000000000000000e+01 6.725000000000000000e+01
0.000000000000000000e+00 2.753076923076922640e+02 1.653505096435546875e+02 -1.579129028320312500e+01 9.999976158142089844e-01 0.000000000000000000e+00 9.999227905273437500e+01 7.766072154045104980e-01 1.000000000000000000e+00 8.976679077148437500e+02 -6.475000000000000000e+01 6.725000000000000000e+01
0.000000000000000000e+00 5.053923076923074973e+02 1.534677124023437500e+02 -6.376129150390625000e+00 9.541803002357482910e-01 0.000000000000000000e+00 2.217850494384765625e+02 6.057626008987426758e-01 1.000000000000000000e+00 8.003021850585937500e+02 -5.275000000000000000e+01 6.725000000000000000e+01
0.000000000000000000e+00 4.578769230769231058e+02 1.403702697753906250e+02 -7.241760253906250000e+00 7.841606736183166504e-01 0.000000000000000000e+00 1.414481201171875000e+02 6.264642477035522461e-01 1.000000000000000000e+00 6.495432739257812500e+02 -5.225000000000000000e+01 6.725000000000000000e+01
5.000000000000000000e+00 4.080538461538462798e+02 1.251499404907226562e+02 -7.977172851562500000e+00 8.005505800247192383e-01 0.000000000000000000e+00 1.212588729858398438e+02 7.583428025245666504e-01 1.000000000000000000e+00 5.745892944335937500e+02 -5.175000000000000000e+01 6.725000000000000000e+01
8.000000000000000000e+00 3.405384615384615472e+02 1.137305374145507812e+02 -8.712585449218750000e+00 8.016096353530883789e-01 0.000000000000000000e+00 1.010696182250976562e+02 9.818751215934753418e-01 1.000000000000000000e+00 5.096598815917968750e+02 -5.125000000000000000e+01 6.725000000000000000e+01
3.000000000000000000e+00 2.788692307692307963e+02 1.070765380859375000e+02 -9.447998046875000000e+00 8.092667460441589355e-01 0.000000000000000000e+00 8.088037109375000000e+01 9.964952468872070312e-01 1.000000000000000000e+00 5.549470825195312500e+02 -5.075000000000000000e+01 6.725000000000000000e+01
1.000000000000000000e+00 2.902615384615386347e+02 1.071606140136718750e+02 -1.049084472656250000e+01 5.816504359245300293e-01 0.000000000000000000e+00 6.588877105712890625e+01 8.937164545059204102e-01 1.000000000000000000e+00 3.046619567871093750e+02 -5.025000000000000000e+01 6.725000000000000000e+01
0.000000000000000000e+00 1.423307692307692491e+02 1.740882873535156250e+02 -1.485131835937500000e+01 9.998980760574340820e-01 0.000000000000000000e+00 6.014390869140625000e+02 5.931488275527954102e-01 1.000000000000000000e+00 2.423780250549316406e+01 -9.825000000000000000e+01 6.775000000000000000e+01
0.000000000000000000e+00 1.570461538461538282e+02 1.722686004638671875e+02 -1.536004638671875000e+01 9.999421834945678711e-01 0.000000000000000000e+00 5.880235595703125000e+02 6.007881164550781250e-01 1.000000000000000000e+00 3.568496704101562500e+01 -9.675000000000000000e+01 6.775000000000000000e+01
0.000000000000000000e+00 1.639538461538461718e+02 1.712344207763671875e+02 -1.583367919921875000e+01 9.999698996543884277e-01 0.000000000000000000e+00 5.888059082031250000e+02 6.007524132728576660e-01 1.000000000000000000e+00 7.942314910888671875e+01 -9.525000000000000000e+01 6.775000000000000000e+01
0.000000000000000000e+00 1.728307692307692491e+02 1.711998901367187500e+02 -1.600970458984375000e+01 9.999772310256958008e-01 0.000000000000000000e+00 5.812350463867187500e+02 5.889776945114135742e-01 1.000000000000000000e+00 9.508414459228515625e+01 -9.475000000000000000e+01 6.775000000000000000e+01
0.000000000000000000e+00 1.790307692307692378e+02 1.703267211914062500e+02 -1.618572998046875000e+01 9.999861717224121094e-01 0.000000000000000000e+00 5.736642456054687500e+02 5.785574913024902344e-01 1.000000000000000000e+00 1.338662414550781250e+02 -9.425000000000000000e+01 6.775000000000000000e+01
0.000000000000000000e+00 1.865307692307692093e+02 1.690895690917968750e+02 -1.636175537109375000e+01 9.999826550483703613e-01 0.000000000000000000e+00 5.660933837890625000e+02 5.684390664100646973e-01 1.000000000000000000e+00 1.465758361816406250e+02 -9.375000000000000000e+01 6.775000000000000000e+01
0.000000000000000000e+00 2.007230769230768601e+02 1.690108642578125000e+02 -1.646807861328125000e+01 9.999941587448120117e-01 0.000000000000000000e+00 5.574147338867187500e+02 5.579941272735595703e-01 1.000000000000000000e+00 2.717017211914062500e+02 -9.325000000000000000e+01 6.775000000000000000e+01
8.000000000000000000e+00 2.065076923076922526e+02 1.700472564697265625e+02 -1.657440185546875000e+01 9.999921321868896484e-01 0.000000000000000000e+00 5.487360839843750000e+02 5.473276972770690918e-01 1.000000000000000000e+00 2.464716033935546875e+02 -9.275000000000000000e+01 6.775000000000000000e+01
0.000000000000000000e+00 2.135846153846154039e+02 1.711397247314453125e+02 -1.668069458007812500e+01 9.999910593032836914e-01 0.000000000000000000e+00 5.400574340820312500e+02 5.380654931068420410e-01 1.000000000000000000e+00 2.305206909179687500e+02 -9.225000000000000000e+01 6.775000000000000000e+01
0.000000000000000000e+00 2.176461538461538225e+02 1.728861236572265625e+02 -1.677651977539062500e+01 9.999924898147583008e-01 0.000000000000000000e+00 5.309176025390625000e+02 5.338959097862243652e-01 1.000000000000000000e+00 2.432160339355468750e+02 -9.175000000000000000e+01 6.775000000000000000e+01
0.000000000000000000e+00 2.155538461538461377e+02 1.750488586425781250e+02 -1.684082031250000000e+01 9.999830126762390137e-01 0.000000000000000000e+00 5.203942260742187500e+02 5.351859331130981445e-01 1.000000000000000000e+00 1.608981628417968750e+02 -9.125000000000000000e+01 6.775000000000000000e+01
0.000000000000000000e+00 2.205846153846153470e+02 1.782112884521484375e+02 -1.690509033203125000e+01 9.999932050704956055e-01 0.000000000000000000e+00 5.098709106445312500e+02 5.384362339973449707e-01 1.000000000000000000e+00 2.910113525390625000e+02 -9.075000000000000000e+01 6.775000000000000000e+01
0.000000000000000000e+00 2.196230769230769226e+02 1.813420562744140625e+02 -1.696939086914062500e+01 9.999794363975524902e-01 0.000000000000000000e+00 4.993475341796875000e+02 5.396693944931030273e-01 1.000000000000000000e+00 1.595251617431640625e+02 -9.025000000000000000e+01 6.775000000000000000e+01
0.000000000000000000e+00 2.215000000000000284e+02 1.839440917968750000e+02 -1.696972656250000000e+01 9.999790191650390625e-01 0.000000000000000000e+00 4.916674194335937500e+02 5.364832282066345215e-01 1.000000000000000000e+00 2.099471130371093750e+02 -8.975000000000000000e+01 6.775000000000000000e+01
0.000000000000000000e+00 2.306230769230768942e+02 1.861801757812500000e+02 -1.690603637695312500e+01 9.999859333038330078e-01 0.000000000000000000e+00 4.868305053710937500e+02 5.328217744827270508e-01 1.000000000000000000e+00 2.534302368164062500e+02 -8.925000000000000000e+01 6.775000000000000000e+01
7.000000000000000000e+00 2.243076923076923208e+02 1.873860473632812500e+02 -1.684237670898437500e+01 9.999917149543762207e-01 0.000000000000000000e+00 4.819936218261718750e+02 5.361787080764770508e-01 1.000000000000000000e+00 3.558794860839843750e+02 -8.875000000000000000e+01 6.775000000000000000e+01
4.000000000000000000e+00 1.976461538461538225e+02 1.902207641601562500e+02 -1.677871704101562500e+01 9.999716877937316895e-01 0.000000000000000000e+00 4.771567077636718750e+02 5.469593405723571777e-01 1.000000000000000000e+00 1.533623504638671875e+02 -8.825000000000000000e+01 6.775000000000000000e+01
0.000000000000000000e+00 1.772923076923077019e+02 1.961212005615234375e+02 -1.629144287109375000e+01 9.999432563781738281e-01 0.000000000000000000e+00 4.514096069335937500e+02 5.443679094314575195e-01 1.000000000000000000e+00 1.549253387451171875e+02 -8.625000000000000000e+01 6.775000000000000000e+01
0.000000000000000000e+00 2.024461538461538623e+02 2.005017242431640625e+02 -1.608105468750000000e+01 9.999876618385314941e-01 0.000000000000000000e+00 4.581979370117187500e+02 5.236745476722717285e-01 1.000000000000000000e+00 3.706178588867187500e+02 -8.575000000000000000e+01 6.775000000000000000e+01
0.000000000000000000e+00 2.207615384615384357e+02 2.063102874755859375e+02 -1.587069702148437500e+01 9.999861717224121094e-01 0.000000000000000000e+00 4.649862976074218750e+02 5.263323187828063965e-01 1.000000000000000000e+00 3.427216186523437500e+02 -8.525000000000000000e+01 6.775000000000000000e+01
0.000000000000000000e+00 2.243923076923076962e+02 2.115852813720703125e+02 -1.566030883789062500e+01 9.999824166297912598e-01 0.000000000000000000e+00 4.717746582031250000e+02 4.824648499488830566e-01 1.000000000000000000e+00 3.351661987304687500e+02 -8.475000000000000000e+01 6.775000000000000000e+01
0.000000000000000000e+00 2.431923076923076792e+02 2.164825439453125000e+02 -1.543301391601562500e+01 9.999911189079284668e-01 0.000000000000000000e+00 4.754493713378906250e+02 4.769445657730102539e-01 1.000000000000000000e+00 4.232034912109375000e+02 -8.425000000000000000e+01 6.775000000000000000e+01
3.000000000000000000e+00 2.471846153846154266e+02 2.213139648437500000e+02 -1.515484619140625000e+01 9.999836087226867676e-01 0.000000000000000000e+00 4.697832031250000000e+02 4.718041419982910156e-01 1.000000000000000000e+00 3.295561523437500000e+02 -8.375000000000000000e+01 6.775000000000000000e+01
4.000000000000000000e+00 2.626076923076922185e+02 2.250690460205078125e+02 -1.487670898437500000e+01 9.999831914901733398e-01 0.000000000000000000e+00 4.641170349121093750e+02 4.705373644828796387e-01 1.000000000000000000e+00 3.539129638671875000e+02 -8.325000000000000000e+01 6.775000000000000000e+01
0.000000000000000000e+00 2.748230769230769397e+02 2.271919860839843750e+02 -1.459857177734375000e+01 9.999774694442749023e-01 0.000000000000000000e+00 4.584508666992187500e+02 4.774503707885742188e-01 1.000000000000000000e+00 2.396399078369140625e+02 -8.275000000000000000e+01 6.775000000000000000e+01
1.000000000000000000e+00 2.685230769230768715e+02 2.275052185058593750e+02 -1.433609008789062500e+01 9.999452233314514160e-01 0.000000000000000000e+00 4.224771423339843750e+02 4.913022220134735107e-01 1.000000000000000000e+00 1.851823272705078125e+02 -8.225000000000000000e+01 6.775000000000000000e+01
0.000000000000000000e+00 2.708615384615383732e+02 1.993732757568359375e+02 -1.119857788085937500e+01 9.983541965484619141e-01 0.000000000000000000e+00 2.286419219970703125e+02 5.744143724441528320e-01 1.000000000000000000e+00 4.136473464965820312e+01 -7.675000000000000000e+01 6.775000000000000000e+01
0.000000000000000000e+00 2.681461538461539931e+02 1.954952239990234375e+02 -1.119503784179687500e+01 9.981464743614196777e-01 0.000000000000000000e+00 2.301433715820312500e+02 5.786120891571044922e-01 1.000000000000000000e+00 6.456537628173828125e+01 -7.625000000000000000e+01 6.775000000000000000e+01
2.000000000000000000e+00 2.611384615384615699e+02 1.911321105957031250e+02 -1.119149780273437500e+01 9.975252747535705566e-01 0.000000000000000000e+00 2.316448211669921875e+02 5.839909315109252930e-01 1.000000000000000000e+00 4.434779357910156250e+01 -7.575000000000000000e+01 6.775000000000000000e+01
0.000000000000000000e+00 2.388153846153846303e+02 1.439945220947265625e+02 -1.204647827148437500e+01 9.953480958938598633e-01 0.000000000000000000e+00 3.800934448242187500e+02 5.831127166748046875e-01 1.000000000000000000e+00 1.386867218017578125e+02 -7.175000000000000000e+01 6.775000000000000000e+01
0.000000000000000000e+00 2.463000000000000114e+02 1.416445922851562500e+02 -1.219259643554687500e+01 9.959628582000732422e-01 0.000000000000000000e+00 4.418667602539062500e+02 5.679779052734375000e-01 1.000000000000000000e+00 1.523595886230468750e+02 -7.125000000000000000e+01 6.775000000000000000e+01
0.000000000000000000e+00 2.481384615384615131e+02 1.431924133300781250e+02 -1.262084960937500000e+01 9.983783960342407227e-01 0.000000000000000000e+00 4.237207336425781250e+02 5.509784221649169922e-01 1.000000000000000000e+00 2.961572875976562500e+02 -7.075000000000000000e+01 6.775000000000000000e+01
0.000000000000000000e+00 2.517230769230768601e+02 1.456499481201171875e+02 -1.304913330078125000e+01 9.972811341285705566e-01 0.000000000000000000e+00 4.055747375488281250e+02 5.295403599739074707e-01 1.000000000000000000e+00 2.620734252929687500e+02 -7.025000000000000000e+01 6.775000000000000000e+01
0.000000000000000000e+00 2.674384615384614676e+02 1.484954071044921875e+02 -1.347738647460937500e+01 9.988996982574462891e-01 0.000000000000000000e+00 3.874287414550781250e+02 4.990220367908477783e-01 1.000000000000000000e+00 3.405793762207031250e+02 -6.975000000000000000e+01 6.775000000000000000e+01
[truncated: 22,047 more chars]
