# Supplementary material for: Environmental Conditions for Alternative Tree Cover States in HighLatitudes
Source: Copernicus journal article supplement (doi:10.5194/bg-2016-401), 2016-10-11
Supplement: Supplementary file 4 [file bg-2016-401-supplement.zip › Analysis/files_to_load_and_import/boreal_na_east_onlyfire_database.txt]

5.000000000000000000e+00 5.794153846153845961e+02 2.693516540527343750e+02 4.622741699218750000e+00 0.000000000000000000e+00 2.941176593303680420e-01 3.318472656250000000e+03 3.930151700973510742e+00 1.000000000000000000e+00 4.106708374023437500e+02 -9.875000000000000000e+01 4.525000000000000000e+01
5.300000000000000000e+01 1.007999999999999886e+03 4.910429077148437500e+02 2.500915527343750000e+00 0.000000000000000000e+00 2.941176593303680420e-01 2.518484375000000000e+03 1.247510671615600586e+00 4.000000000000000000e+00 9.516970062255859375e+01 -7.475000000000000000e+01 4.525000000000000000e+01
5.100000000000000000e+01 1.197900000000001000e+03 5.579771118164062500e+02 2.170196533203125000e+00 0.000000000000000000e+00 2.941176593303680420e-01 2.463142578125000000e+03 9.503039121627807617e-01 4.000000000000000000e+00 1.238608398437500000e+02 -7.275000000000000000e+01 4.525000000000000000e+01
3.000000000000000000e+00 5.776769230769230035e+02 2.889544372558593750e+02 4.324340820312500000e+00 0.000000000000000000e+00 3.529411852359771729e-01 3.321112792968750000e+03 3.882982492446899414e+00 1.000000000000000000e+00 3.921739807128906250e+02 -9.825000000000000000e+01 4.575000000000000000e+01
5.500000000000000000e+01 7.190230769230772694e+02 3.119446411132812500e+02 3.655761718750000000e+00 0.000000000000000000e+00 2.941176593303680420e-01 3.179280029296875000e+03 3.858378171920776367e+00 4.000000000000000000e+00 3.810711364746093750e+02 -9.475000000000000000e+01 4.575000000000000000e+01
6.100000000000000000e+01 1.058207692307692014e+03 4.118653564453125000e+02 2.948486328125000000e+00 0.000000000000000000e+00 2.352941185235977173e-01 2.717898925781250000e+03 9.381765723228454590e-01 4.000000000000000000e+00 3.042209472656250000e+02 -7.975000000000000000e+01 4.575000000000000000e+01
5.500000000000000000e+01 8.382230769230770875e+02 3.843036193847656250e+02 2.543609619140625000e+00 0.000000000000000000e+00 8.235294222831726074e-01 2.647251708984375000e+03 9.459466934204101562e-01 4.000000000000000000e+00 1.865707855224609375e+02 -7.725000000000000000e+01 4.575000000000000000e+01
1.600000000000000000e+01 1.099438461538461979e+03 5.709292602539062500e+02 1.708953857421875000e+00 0.000000000000000000e+00 2.352941185235977173e-01 2.456335449218750000e+03 9.406006336212158203e-01 2.000000000000000000e+00 1.445616149902343750e+02 -7.225000000000000000e+01 4.575000000000000000e+01
6.200000000000000000e+01 7.002384615384614790e+02 4.115047302246093750e+02 4.246490478515625000e+00 0.000000000000000000e+00 2.352941185235977173e-01 2.752680419921875000e+03 9.252884387969970703e-01 4.000000000000000000e+00 2.407530059814453125e+02 -8.525000000000000000e+01 4.625000000000000000e+01
6.800000000000000000e+01 1.150407692307692287e+03 5.038307800292968750e+02 1.411682128906250000e+00 0.000000000000000000e+00 2.352941185235977173e-01 2.426549316406250000e+03 1.836852192878723145e+00 4.000000000000000000e+00 1.738219757080078125e+02 -7.325000000000000000e+01 4.625000000000000000e+01
6.700000000000000000e+01 9.690461538461539703e+02 4.328831787109375000e+02 2.970458984375000000e+00 0.000000000000000000e+00 2.352941185235977173e-01 2.841294433593750000e+03 8.825674057006835938e-01 4.000000000000000000e+00 3.655201110839843750e+02 -8.375000000000000000e+01 4.675000000000000000e+01
6.900000000000000000e+01 9.164076923076916046e+02 4.158787231445312500e+02 2.662506103515625000e+00 0.000000000000000000e+00 2.941176593303680420e-01 2.814278076171875000e+03 8.899357914924621582e-01 4.000000000000000000e+00 4.521817932128906250e+02 -8.325000000000000000e+01 4.675000000000000000e+01
6.600000000000000000e+01 8.785153846153850736e+02 4.012279968261718750e+02 2.354553222656250000e+00 0.000000000000000000e+00 5.294117927551269531e-01 2.787261718750000000e+03 8.852728605270385742e-01 4.000000000000000000e+00 4.447933654785156250e+02 -8.275000000000000000e+01 4.675000000000000000e+01
4.000000000000000000e+00 5.285769230769230944e+02 2.473729858398437500e+02 3.304229736328125000e+00 0.000000000000000000e+00 6.470588445663452148e-01 3.240760986328125000e+03 3.648505687713623047e+00 1.000000000000000000e+00 5.601644897460937500e+02 -9.975000000000000000e+01 4.725000000000000000e+01
4.000000000000000000e+00 5.944538461538463707e+02 2.899802551269531250e+02 3.260314941406250000e+00 0.000000000000000000e+00 1.470588207244873047e+00 3.229199462890625000e+03 3.773653268814086914e+00 1.000000000000000000e+00 2.971401672363281250e+02 -9.725000000000000000e+01 4.725000000000000000e+01
6.000000000000000000e+00 6.257000000000000455e+02 2.808263854980468750e+02 3.071807861328125000e+00 0.000000000000000000e+00 8.235294222831726074e-01 3.193948242187500000e+03 3.809137582778930664e+00 1.000000000000000000e+00 2.653315124511718750e+02 -9.675000000000000000e+01 4.725000000000000000e+01
1.500000000000000000e+01 6.545538461538460524e+02 3.037971191406250000e+02 2.694824218750000000e+00 0.000000000000000000e+00 1.352941155433654785e+00 3.123446044921875000e+03 3.708456039428710938e+00 2.000000000000000000e+00 4.435945129394531250e+02 -9.575000000000000000e+01 4.725000000000000000e+01
6.200000000000000000e+01 1.010361538461538657e+03 4.179232482910156250e+02 2.233978271484375000e+00 0.000000000000000000e+00 5.882352963089942932e-02 2.721814697265625000e+03 8.551677465438842773e-01 4.000000000000000000e+00 4.875455017089843750e+02 -8.375000000000000000e+01 4.725000000000000000e+01
7.000000000000000000e+00 5.390461538461537430e+02 2.462920227050781250e+02 2.950958251953125000e+00 0.000000000000000000e+00 1.176470592617988586e-01 3.162782714843750000e+03 3.633526086807250977e+00 1.000000000000000000e+00 4.533055114746093750e+02 -9.875000000000000000e+01 4.775000000000000000e+01
5.500000000000000000e+01 6.288461538461538112e+02 2.769833068847656250e+02 2.056335449218750000e+00 0.000000000000000000e+00 3.529411852359771729e-01 2.989865234375000000e+03 3.631845474243164062e+00 4.000000000000000000e+00 3.957941284179687500e+02 -9.525000000000000000e+01 4.775000000000000000e+01
5.300000000000000000e+01 8.195307692307695788e+02 3.576873779296875000e+02 1.867065429687500000e+00 0.000000000000000000e+00 4.705882370471954346e-01 2.834005615234375000e+03 8.565191030502319336e-01 4.000000000000000000e+00 5.015929870605468750e+02 -9.125000000000000000e+01 4.775000000000000000e+01
5.700000000000000000e+01 8.388769230769232763e+02 4.242979431152343750e+02 5.275268554687500000e-01 0.000000000000000000e+00 1.176470592617988586e-01 2.526777343750000000e+03 8.642333149909973145e-01 4.000000000000000000e+00 3.866573486328125000e+02 -8.175000000000000000e+01 4.775000000000000000e+01
6.600000000000000000e+01 9.411923076923077360e+02 4.759267578125000000e+02 1.775207519531250000e-01 0.000000000000000000e+00 5.882353186607360840e-01 2.291194824218750000e+03 8.313346505165100098e-01 4.000000000000000000e+00 5.236082153320312500e+02 -7.425000000000000000e+01 4.775000000000000000e+01
6.100000000000000000e+01 9.665692307692303302e+02 4.627160644531250000e+02 9.979248046875000000e-02 0.000000000000000000e+00 5.882353186607360840e-01 2.270797607421875000e+03 8.330369591712951660e-01 4.000000000000000000e+00 4.762137451171875000e+02 -7.375000000000000000e+01 4.775000000000000000e+01
6.200000000000000000e+01 9.859153846153842551e+02 4.461420288085937500e+02 -4.977416992187500000e-02 0.000000000000000000e+00 5.882352963089942932e-02 2.237762939453125000e+03 8.583158850669860840e-01 4.000000000000000000e+00 3.285252075195312500e+02 -7.275000000000000000e+01 4.775000000000000000e+01
6.700000000000000000e+01 1.127392307692307213e+03 4.643101196289062500e+02 5.838012695312500000e-02 0.000000000000000000e+00 2.352941185235977173e-01 2.286434814453125000e+03 8.545489907264709473e-01 4.000000000000000000e+00 2.125028533935546875e+02 -6.875000000000000000e+01 4.775000000000000000e+01
5.900000000000000000e+01 8.178076923076924913e+02 2.961388244628906250e+02 1.532318115234375000e+00 0.000000000000000000e+00 2.941176593303680420e-01 2.719706054687500000e+03 1.940888404846191406e+00 4.000000000000000000e+00 4.447554626464843750e+02 -9.075000000000000000e+01 4.825000000000000000e+01
1.700000000000000000e+01 8.240307692307693515e+02 3.894057312011718750e+02 -4.328308105468750000e-01 0.000000000000000000e+00 3.529411852359771729e-01 2.395576904296875000e+03 8.654832839965820312e-01 2.000000000000000000e+00 3.505063781738281250e+02 -8.075000000000000000e+01 4.825000000000000000e+01
4.800000000000000000e+01 9.510384615384616609e+02 4.826366271972656250e+02 -2.502136230468750000e-01 0.000000000000000000e+00 5.882353186607360840e-01 2.274777832031250000e+03 1.982495665550231934e+00 4.000000000000000000e+00 4.197441711425781250e+02 -7.625000000000000000e+01 4.825000000000000000e+01
5.400000000000000000e+01 9.560307692307694651e+02 4.884004211425781250e+02 -2.505493164062500000e-01 0.000000000000000000e+00 1.176470592617988586e-01 2.252505371093750000e+03 1.596284031867980957e+00 4.000000000000000000e+00 4.361952209472656250e+02 -7.575000000000000000e+01 4.825000000000000000e+01
3.200000000000000000e+01 9.450307692307693515e+02 4.519853820800781250e+02 -4.674682617187500000e-01 0.000000000000000000e+00 5.882353186607360840e-01 2.153747070312500000e+03 1.338605046272277832e+00 3.000000000000000000e+00 5.366400756835937500e+02 -7.325000000000000000e+01 4.825000000000000000e+01
6.200000000000000000e+01 9.622692307692306031e+02 4.505471191406250000e+02 -5.243530273437500000e-01 0.000000000000000000e+00 5.294117927551269531e-01 2.142044921875000000e+03 8.277909755706787109e-01 4.000000000000000000e+00 4.724485168457031250e+02 -7.275000000000000000e+01 4.825000000000000000e+01
3.000000000000000000e+00 5.647692307692306031e+02 2.403510284423828125e+02 2.086334228515625000e+00 0.000000000000000000e+00 5.882353186607360840e-01 2.979109863281250000e+03 3.654108524322509766e+00 1.000000000000000000e+00 3.018871459960937500e+02 -9.775000000000000000e+01 4.875000000000000000e+01
3.000000000000000000e+00 6.086615384615383846e+02 2.816318054199218750e+02 1.529266357421875000e+00 0.000000000000000000e+00 1.117647051811218262e+00 2.877527099609375000e+03 3.549945592880249023e+00 1.000000000000000000e+00 3.100026855468750000e+02 -9.625000000000000000e+01 4.875000000000000000e+01
7.000000000000000000e+00 6.541692307692308077e+02 2.870187683105468750e+02 1.123352050781250000e+00 0.000000000000000000e+00 5.294117927551269531e-01 2.798823242187500000e+03 2.977973222732543945e+00 1.000000000000000000e+00 3.607959289550781250e+02 -9.525000000000000000e+01 4.875000000000000000e+01
1.900000000000000000e+01 6.779692307692307622e+02 2.798859252929687500e+02 9.490051269531250000e-01 0.000000000000000000e+00 5.882353186607360840e-01 2.760330078125000000e+03 2.299339532852172852e+00 2.000000000000000000e+00 3.304945068359375000e+02 -9.475000000000000000e+01 4.875000000000000000e+01
5.200000000000000000e+01 8.356230769230764963e+02 3.906992797851562500e+02 8.926391601562500000e-01 0.000000000000000000e+00 5.882352963089942932e-02 2.448678955078125000e+03 1.989857554435729980e+00 4.000000000000000000e+00 3.973202819824218750e+02 -8.525000000000000000e+01 4.875000000000000000e+01
6.300000000000000000e+01 8.826076923076925596e+02 3.755951843261718750e+02 3.489074707031250000e-01 0.000000000000000000e+00 5.882353186607360840e-01 2.402072021484375000e+03 2.003885746002197266e+00 4.000000000000000000e+00 3.590238647460937500e+02 -8.425000000000000000e+01 4.875000000000000000e+01
3.600000000000000000e+01 9.059923076923080316e+02 4.660487060546875000e+02 -7.882080078125000000e-01 0.000000000000000000e+00 2.941176593303680420e-01 2.205148437500000000e+03 1.996564507484436035e+00 3.000000000000000000e+00 4.052286682128906250e+02 -7.675000000000000000e+01 4.875000000000000000e+01
7.000000000000000000e+01 9.243076923076921503e+02 4.743436889648437500e+02 -9.009704589843750000e-01 9.999999776482582092e-03 5.882353186607360840e-01 2.096708740234375000e+03 1.556341886520385742e+00 4.000000000000000000e+00 5.547574462890625000e+02 -7.425000000000000000e+01 4.875000000000000000e+01
9.000000000000000000e+00 6.082769230769233673e+02 2.405893096923828125e+02 1.621002197265625000e+00 0.000000000000000000e+00 1.176470637321472168e+00 2.889971923828125000e+03 3.567128181457519531e+00 1.000000000000000000e+00 3.852011108398437500e+02 -9.825000000000000000e+01 4.925000000000000000e+01
6.700000000000000000e+01 6.045384615384616609e+02 2.650178222656250000e+02 1.083984375000000000e+00 0.000000000000000000e+00 2.352941185235977173e-01 2.789942626953125000e+03 1.604526042938232422e+00 4.000000000000000000e+00 3.350627746582031250e+02 -9.625000000000000000e+01 4.925000000000000000e+01
5.500000000000000000e+01 8.320461538461541977e+02 3.470938720703125000e+02 3.580932617187500000e-01 0.000000000000000000e+00 5.882352963089942932e-02 2.503016113281250000e+03 2.058901309967041016e+00 4.000000000000000000e+00 5.062287292480468750e+02 -9.075000000000000000e+01 4.925000000000000000e+01
6.000000000000000000e+01 8.155384615384620020e+02 3.460782470703125000e+02 5.634460449218750000e-01 0.000000000000000000e+00 2.941176593303680420e-01 2.433010253906250000e+03 1.985941886901855469e+00 4.000000000000000000e+00 4.912802124023437500e+02 -8.975000000000000000e+01 4.925000000000000000e+01
4.700000000000000000e+01 8.204307692307695561e+02 3.566723937988281250e+02 6.115112304687500000e-01 0.000000000000000000e+00 2.352941185235977173e-01 2.083339355468750000e+03 1.979182600975036621e+00 4.000000000000000000e+00 4.700942382812500000e+02 -8.775000000000000000e+01 4.925000000000000000e+01
2.900000000000000000e+01 8.287538461538463253e+02 4.084529113769531250e+02 5.949707031250000000e-01 0.000000000000000000e+00 2.352941185235977173e-01 2.293327148437500000e+03 1.918120384216308594e+00 3.000000000000000000e+00 3.583916320800781250e+02 -8.675000000000000000e+01 4.925000000000000000e+01
2.200000000000000000e+01 8.390153846153848463e+02 4.113103637695312500e+02 5.867004394531250000e-01 0.000000000000000000e+00 5.882353186607360840e-01 2.398321044921875000e+03 1.283315420150756836e+00 3.000000000000000000e+00 3.113303222656250000e+02 -8.625000000000000000e+01 4.925000000000000000e+01
4.400000000000000000e+01 8.315923076923073722e+02 4.094239501953125000e+02 3.656311035156250000e-01 0.000000000000000000e+00 6.470588445663452148e-01 2.380763183593750000e+03 1.490266084671020508e+00 3.000000000000000000e+00 3.400563964843750000e+02 -8.575000000000000000e+01 4.925000000000000000e+01
3.800000000000000000e+01 8.557923076923078725e+02 4.609091796875000000e+02 -1.302398681640625000e+00 0.000000000000000000e+00 2.941176593303680420e-01 2.108683105468750000e+03 1.886710047721862793e+00 3.000000000000000000e+00 3.362405090332031250e+02 -7.625000000000000000e+01 4.925000000000000000e+01
4.800000000000000000e+01 8.733076923076921503e+02 4.935500793457031250e+02 -1.402832031250000000e+00 9.999999776482582092e-03 5.882353186607360840e-01 2.056397460937500000e+03 1.970242381095886230e+00 4.000000000000000000e+00 3.909648437500000000e+02 -7.525000000000000000e+01 4.925000000000000000e+01
6.100000000000000000e+01 8.935769230769226397e+02 4.943325500488281250e+02 -1.459381103515625000e+00 9.999999776482582092e-03 2.941176593303680420e-01 2.033066894531250000e+03 1.963293671607971191e+00 4.000000000000000000e+00 4.352072753906250000e+02 -7.475000000000000000e+01 4.925000000000000000e+01
6.300000000000000000e+01 8.419461538461533792e+02 4.467470092773437500e+02 -1.585144042968750000e+00 0.000000000000000000e+00 5.882353186607360840e-01 1.992030639648437500e+03 1.987639188766479492e+00 4.000000000000000000e+00 4.083409423828125000e+02 -7.375000000000000000e+01 4.925000000000000000e+01
6.000000000000000000e+01 8.622153846153846644e+02 4.200051269531250000e+02 -1.648040771484375000e+00 9.999999776482582092e-03 2.941176593303680420e-01 1.971512451171875000e+03 1.976844549179077148e+00 4.000000000000000000e+00 4.407975158691406250e+02 -7.325000000000000000e+01 4.925000000000000000e+01
5.500000000000000000e+01 9.179076923076929688e+02 4.439488220214843750e+02 -1.692108154296875000e+00 0.000000000000000000e+00 2.941176593303680420e-01 1.949466430664062500e+03 8.163918256759643555e-01 4.000000000000000000e+00 2.476797790527343750e+02 -7.225000000000000000e+01 4.925000000000000000e+01
5.600000000000000000e+01 1.086607692307692787e+03 4.620738525390625000e+02 -1.678955078125000000e+00 9.999999776482582092e-03 5.882353186607360840e-01 1.935918701171875000e+03 1.920350790023803711e+00 4.000000000000000000e+00 5.749169921875000000e+02 -7.075000000000000000e+01 4.925000000000000000e+01
2.800000000000000000e+01 5.458846153846155858e+02 2.751961059570312500e+02 1.220703125000000000e+00 0.000000000000000000e+00 5.882353186607360840e-01 2.809464111328125000e+03 3.544561862945556641e+00 3.000000000000000000e+00 3.664909362792968750e+02 -9.925000000000000000e+01 4.975000000000000000e+01
6.400000000000000000e+01 6.003153846153848008e+02 2.573985595703125000e+02 4.609375000000000000e-01 0.000000000000000000e+00 3.529411852359771729e-01 2.668237548828125000e+03 2.811593770980834961e+00 4.000000000000000000e+00 3.082296447753906250e+02 -9.575000000000000000e+01 4.975000000000000000e+01
3.400000000000000000e+01 8.188230769230772239e+02 3.442863464355468750e+02 -1.107482910156250000e-01 0.000000000000000000e+00 2.941176593303680420e-01 2.353338867187500000e+03 1.999331474304199219e+00 3.000000000000000000e+00 4.422583923339843750e+02 -8.975000000000000000e+01 4.975000000000000000e+01
2.200000000000000000e+01 7.979076923076930825e+02 4.494380187988281250e+02 -1.414550781250000000e+00 9.999999776482582092e-03 5.882352963089942932e-02 2.188056152343750000e+03 1.951460123062133789e+00 3.000000000000000000e+00 2.664639587402343750e+02 -7.925000000000000000e+01 4.975000000000000000e+01
4.500000000000000000e+01 8.595846153846155175e+02 4.435782775878906250e+02 -2.285827636718750000e+00 9.999999776482582092e-03 8.823529481887817383e-01 1.883006103515625000e+03 1.951697826385498047e+00 4.000000000000000000e+00 3.982277526855468750e+02 -7.325000000000000000e+01 4.975000000000000000e+01
4.700000000000000000e+01 8.707461538461537884e+02 4.408283691406250000e+02 -2.299407958984375000e+00 9.999999776482582092e-03 9.411764740943908691e-01 1.869687377929687500e+03 1.957413792610168457e+00 4.000000000000000000e+00 3.992044067382812500e+02 -7.275000000000000000e+01 4.975000000000000000e+01
6.200000000000000000e+01 9.015230769230771557e+02 4.548774414062500000e+02 -2.293792724609375000e+00 9.999999776482582092e-03 8.823529481887817383e-01 1.859492797851562500e+03 1.279251337051391602e+00 4.000000000000000000e+00 4.625705566406250000e+02 -7.225000000000000000e+01 4.975000000000000000e+01
5.800000000000000000e+01 1.013338461538461843e+03 4.781552429199218750e+02 -2.172180175781250000e+00 9.999999776482582092e-03 2.941176593303680420e-01 1.846230346679687500e+03 1.905971765518188477e+00 4.000000000000000000e+00 4.203083496093750000e+02 -7.025000000000000000e+01 4.975000000000000000e+01
5.000000000000000000e+00 5.178076923076923777e+02 2.913845520019531250e+02 7.048950195312500000e-01 0.000000000000000000e+00 1.000000000000000000e+00 2.709289550781250000e+03 3.319294691085815430e+00 1.000000000000000000e+00 5.362920532226562500e+02 -9.975000000000000000e+01 5.025000000000000000e+01
7.000000000000000000e+00 5.623384615384616154e+02 3.082626037597656250e+02 7.152709960937500000e-01 0.000000000000000000e+00 1.352941155433654785e+00 2.711467041015625000e+03 3.498886108398437500e+00 1.000000000000000000e+00 2.693195800781250000e+02 -9.875000000000000000e+01 5.025000000000000000e+01
5.100000000000000000e+01 5.888461538461536975e+02 2.925363159179687500e+02 1.934204101562500000e-01 0.000000000000000000e+00 1.882352948188781738e+00 2.614773925781250000e+03 3.475214004516601562e+00 4.000000000000000000e+00 2.620137329101562500e+02 -9.625000000000000000e+01 5.025000000000000000e+01
6.300000000000000000e+01 8.125999999999999091e+02 3.257697753906250000e+02 -7.849121093750000000e-01 0.000000000000000000e+00 2.352941185235977173e-01 2.273667236328125000e+03 1.985110521316528320e+00 4.000000000000000000e+00 4.269435424804687500e+02 -8.975000000000000000e+01 5.025000000000000000e+01
2.500000000000000000e+01 7.565307692307693515e+02 4.149326477050781250e+02 -1.649566650390625000e+00 9.999999776482582092e-03 5.882352963089942932e-02 2.141022216796875000e+03 7.859046459197998047e-01 3.000000000000000000e+00 2.536848297119140625e+02 -7.925000000000000000e+01 5.025000000000000000e+01
5.800000000000000000e+01 7.699230769230767919e+02 4.263926086425781250e+02 -1.690063476562500000e+00 9.999999776482582092e-03 6.470588445663452148e-01 2.125023681640625000e+03 1.186261773109436035e+00 4.000000000000000000e+00 2.777930603027343750e+02 -7.875000000000000000e+01 5.025000000000000000e+01
5.200000000000000000e+01 8.184384615384612971e+02 4.591891784667968750e+02 -2.313140869140625000e+00 9.999999776482582092e-03 1.000000000000000000e+00 1.961993774414062500e+03 1.926665902137756348e+00 4.000000000000000000e+00 3.295102233886718750e+02 -7.625000000000000000e+01 5.025000000000000000e+01
2.300000000000000000e+01 8.455923076923082817e+02 4.833535766601562500e+02 -2.446166992187500000e+00 9.999999776482582092e-03 5.882353186607360840e-01 1.929806640625000000e+03 1.926473975181579590e+00 3.000000000000000000e+00 3.473002319335937500e+02 -7.575000000000000000e+01 5.025000000000000000e+01
6.600000000000000000e+01 8.784538461538465981e+02 5.025746459960937500e+02 -2.685424804687500000e+00 9.999999776482582092e-03 2.941176593303680420e-01 1.869093627929687500e+03 1.393818616867065430e+00 4.000000000000000000e+00 3.796215209960937500e+02 -7.475000000000000000e+01 5.025000000000000000e+01
5.300000000000000000e+01 8.959307692307691013e+02 4.898930358886718750e+02 -2.844207763671875000e+00 1.030258163809776306e-01 2.941176593303680420e-01 1.819364379882812500e+03 1.811505556106567383e+00 4.000000000000000000e+00 4.420063781738281250e+02 -7.375000000000000000e+01 5.025000000000000000e+01
5.500000000000000000e+01 9.303538461538466890e+02 4.592142028808593750e+02 -2.922882080078125000e+00 1.045278161764144897e-01 6.470588445663452148e-01 1.780241699218750000e+03 1.588185787200927734e+00 4.000000000000000000e+00 4.514704284667968750e+02 -7.275000000000000000e+01 5.025000000000000000e+01
6.900000000000000000e+01 1.003523076923077269e+03 4.516660461425781250e+02 -2.868072509765625000e+00 1.776345223188400269e-01 6.470588445663452148e-01 1.758796264648437500e+03 1.806645035743713379e+00 4.000000000000000000e+00 6.245886840820312500e+02 -7.175000000000000000e+01 5.025000000000000000e+01
4.300000000000000000e+01 9.947769230769229125e+02 4.536697387695312500e+02 -2.775817871093750000e+00 1.329844295978546143e-01 2.941176593303680420e-01 1.749415161132812500e+03 1.826298594474792480e+00 3.000000000000000000e+00 5.385020141601562500e+02 -7.075000000000000000e+01 5.025000000000000000e+01
6.000000000000000000e+01 1.028446153846153720e+03 4.546351318359375000e+02 -2.710998535156250000e+00 1.335572302341461182e-01 2.941176593303680420e-01 1.750756713867187500e+03 1.826424717903137207e+00 4.000000000000000000e+00 6.035090942382812500e+02 -7.025000000000000000e+01 5.025000000000000000e+01
2.800000000000000000e+01 1.146507692307692651e+03 5.132465209960937500e+02 -2.320892333984375000e+00 9.999999776482582092e-03 2.941176593303680420e-01 1.786145385742187500e+03 1.840444922447204590e+00 3.000000000000000000e+00 4.812283325195312500e+02 -6.825000000000000000e+01 5.025000000000000000e+01
6.200000000000000000e+01 5.573769230769229353e+02 2.713637390136718750e+02 3.733520507812500000e-01 0.000000000000000000e+00 2.352941185235977173e-01 2.641039306640625000e+03 9.145859479904174805e-01 4.000000000000000000e+00 6.901782226562500000e+02 -9.975000000000000000e+01 5.075000000000000000e+01
2.200000000000000000e+01 5.415307692307693515e+02 2.741268920898437500e+02 4.304504394531250000e-01 0.000000000000000000e+00 2.941176593303680420e-01 2.649975830078125000e+03 2.879628658294677734e+00 3.000000000000000000e+00 3.066116333007812500e+02 -9.925000000000000000e+01 5.075000000000000000e+01
2.300000000000000000e+01 5.350076923076923094e+02 2.690776672363281250e+02 2.544860839843750000e-01 0.000000000000000000e+00 2.352941185235977173e-01 2.630026123046875000e+03 3.420057535171508789e+00 3.000000000000000000e+00 2.742057800292968750e+02 -9.775000000000000000e+01 5.075000000000000000e+01
6.000000000000000000e+01 8.297307692307695106e+02 3.726782836914062500e+02 -1.355712890625000000e+00 0.000000000000000000e+00 5.882352963089942932e-02 2.261667968750000000e+03 1.475813269615173340e+00 4.000000000000000000e+00 3.974946899414062500e+02 -9.175000000000000000e+01 5.075000000000000000e+01
6.100000000000000000e+01 8.171384615384612289e+02 2.987705078125000000e+02 -1.374359130859375000e+00 9.999999776482582092e-03 5.294117927551269531e-01 2.202395751953125000e+03 1.965211153030395508e+00 4.000000000000000000e+00 3.753635864257812500e+02 -8.975000000000000000e+01 5.075000000000000000e+01
3.300000000000000000e+01 7.912307692307693969e+02 2.930891723632812500e+02 -1.404876708984375000e+00 9.999999776482582092e-03 5.294117927551269531e-01 2.189227050781250000e+03 7.943789362907409668e-01 3.000000000000000000e+00 3.765173950195312500e+02 -8.925000000000000000e+01 5.075000000000000000e+01
4.600000000000000000e+01 7.365076923076924231e+02 3.452514648437500000e+02 -1.543914794921875000e+00 9.999999776482582092e-03 2.352941185235977173e-01 2.151469726562500000e+03 7.919994592666625977e-01 4.000000000000000000e+00 3.156413879394531250e+02 -8.775000000000000000e+01 5.075000000000000000e+01
5.500000000000000000e+01 6.961307692307689194e+02 3.913004150390625000e+02 -1.892486572265625000e+00 9.999999776482582092e-03 1.176470592617988586e-01 2.117810791015625000e+03 1.568650126457214355e+00 4.000000000000000000e+00 1.853336334228515625e+02 -8.575000000000000000e+01 5.075000000000000000e+01
3.300000000000000000e+01 6.904230769230769056e+02 4.035644226074218750e+02 -1.897796630859375000e+00 9.999999776482582092e-03 5.882352963089942932e-02 2.134947021484375000e+03 1.995359778404235840e+00 3.000000000000000000e+00 1.600920257568359375e+02 -8.275000000000000000e+01 5.075000000000000000e+01
1.600000000000000000e+01 7.023615384615385437e+02 3.517676391601562500e+02 -2.004669189453125000e+00 9.999999776482582092e-03 5.882352963089942932e-02 2.020353149414062500e+03 1.926719188690185547e+00 2.000000000000000000e+00 6.465886688232421875e+01 -8.075000000000000000e+01 5.075000000000000000e+01
9.000000000000000000e+00 7.054846153846151537e+02 3.534559936523437500e+02 -1.953247070312500000e+00 9.999999776482582092e-03 5.882352963089942932e-02 2.043467651367187500e+03 1.915175437927246094e+00 1.000000000000000000e+00 5.528144073486328125e+01 -7.975000000000000000e+01 5.075000000000000000e+01
6.000000000000000000e+01 8.076076923076924459e+02 4.591826171875000000e+02 -2.717193603515625000e+00 9.999999776482582092e-03 5.882352963089942932e-02 1.898012451171875000e+03 1.696277737617492676e+00 4.000000000000000000e+00 2.782084350585937500e+02 -7.625000000000000000e+01 5.075000000000000000e+01
2.500000000000000000e+01 8.333153846153848008e+02 4.813179321289062500e+02 -2.886352539062500000e+00 9.999999776482582092e-03 6.470588445663452148e-01 1.863337646484375000e+03 7.654276490211486816e-01 3.000000000000000000e+00 3.105252075195312500e+02 -7.575000000000000000e+01 5.075000000000000000e+01
3.000000000000000000e+01 8.349846153846156085e+02 4.981842956542968750e+02 -3.055541992187500000e+00 9.999999776482582092e-03 9.411764740943908691e-01 1.828662841796875000e+03 8.167186379432678223e-01 3.000000000000000000e+00 3.307462158203125000e+02 -7.525000000000000000e+01 5.075000000000000000e+01
2.400000000000000000e+01 9.250538461538459387e+02 4.286358642578125000e+02 -3.399047851562500000e+00 1.782589107751846313e-01 2.941176593303680420e-01 1.693128906250000000e+03 7.309967875480651855e-01 3.000000000000000000e+00 5.387216186523437500e+02 -7.225000000000000000e+01 5.075000000000000000e+01
5.100000000000000000e+01 9.627307692307699654e+02 4.124972839355468750e+02 -3.360229492187500000e+00 1.814021319150924683e-01 6.470588445663452148e-01 1.681328613281250000e+03 7.218065857887268066e-01 4.000000000000000000e+00 5.363314208984375000e+02 -7.175000000000000000e+01 5.075000000000000000e+01
1.200000000000000000e+01 9.391923076923079634e+02 3.943440246582031250e+02 -3.321380615234375000e+00 1.242327764630317688e-01 5.882353186607360840e-01 1.669528198242187500e+03 1.028936386108398438e+00 2.000000000000000000e+00 4.574375305175781250e+02 -7.125000000000000000e+01 5.075000000000000000e+01
4.900000000000000000e+01 9.549769230769232990e+02 4.001877746582031250e+02 -3.257263183593750000e+00 1.329262256622314453e-01 6.470588445663452148e-01 1.668478515625000000e+03 9.205482006072998047e-01 4.000000000000000000e+00 5.048030090332031250e+02 -7.075000000000000000e+01 5.075000000000000000e+01
6.700000000000000000e+01 1.155615384615384983e+03 5.425155029296875000e+02 -2.474090576171875000e+00 9.999999776482582092e-03 5.882352963089942932e-02 1.726426269531250000e+03 7.055495977401733398e-01 4.000000000000000000e+00 4.692334594726562500e+02 -6.675000000000000000e+01 5.075000000000000000e+01
5.900000000000000000e+01 1.083492307692307577e+03 5.519086303710937500e+02 -2.103851318359375000e+00 2.166021019220352173e-01 8.823529481887817383e-01 1.759411621093750000e+03 1.614000916481018066e+00 4.000000000000000000e+00 6.121040039062500000e+02 -6.575000000000000000e+01 5.075000000000000000e+01
6.600000000000000000e+01 1.036515384615385074e+03 5.641030273437500000e+02 -1.461730957031250000e+00 9.999999776482582092e-03 2.352941185235977173e-01 1.797281372070312500e+03 7.183454036712646484e-01 4.000000000000000000e+00 3.090615844726562500e+02 -6.425000000000000000e+01 5.075000000000000000e+01
5.600000000000000000e+01 1.000153846153846189e+03 5.430169677734375000e+02 -1.042236328125000000e+00 9.999999776482582092e-03 2.941176593303680420e-01 1.815019287109375000e+03 1.626750707626342773e+00 4.000000000000000000e+00 3.131188659667968750e+02 -6.325000000000000000e+01 5.075000000000000000e+01
7.100000000000000000e+01 9.884000000000000909e+02 5.286614990234375000e+02 -6.365966796875000000e-01 9.999999776482582092e-03 2.941176593303680420e-01 1.825952148437500000e+03 1.727959990501403809e+00 4.000000000000000000e+00 2.802671203613281250e+02 -6.225000000000000000e+01 5.075000000000000000e+01
6.100000000000000000e+01 1.001300000000000409e+03 5.257714233398437500e+02 -7.727050781250000000e-02 0.000000000000000000e+00 1.176470592617988586e-01 1.776979248046875000e+03 1.731526017189025879e+00 4.000000000000000000e+00 2.019813385009765625e+02 -6.125000000000000000e+01 5.075000000000000000e+01
2.800000000000000000e+01 5.294615384615386802e+02 1.882116088867187500e+02 1.886901855468750000e-01 0.000000000000000000e+00 6.470588445663452148e-01 2.598793945312500000e+03 3.415014266967773438e+00 3.000000000000000000e+00 2.606536865234375000e+02 -9.925000000000000000e+01 5.125000000000000000e+01
1.600000000000000000e+01 5.726692307692306940e+02 2.162970275878906250e+02 8.972167968750000000e-03 0.000000000000000000e+00 2.352941185235977173e-01 2.586052001953125000e+03 3.348744392395019531e+00 2.000000000000000000e+00 2.502437438964843750e+02 -9.775000000000000000e+01 5.125000000000000000e+01
2.800000000000000000e+01 6.260076923076923094e+02 2.184717712402343750e+02 -1.170043945312500000e-01 0.000000000000000000e+00 6.470588445663452148e-01 2.565697021484375000e+03 3.336313962936401367e+00 3.000000000000000000e+00 2.389074859619140625e+02 -9.725000000000000000e+01 5.125000000000000000e+01
5.600000000000000000e+01 6.547769230769227988e+02 2.539201507568359375e+02 -8.757019042968750000e-01 0.000000000000000000e+00 2.941176593303680420e-01 2.420117919921875000e+03 8.696691989898681641e-01 4.000000000000000000e+00 3.276743774414062500e+02 -9.525000000000000000e+01 5.125000000000000000e+01
6.700000000000000000e+01 6.913384615384618428e+02 2.408292083740234375e+02 -1.234680175781250000e+00 0.000000000000000000e+00 5.882352963089942932e-02 2.347913574218750000e+03 1.091278314590454102e+00 4.000000000000000000e+00 3.856307373046875000e+02 -9.425000000000000000e+01 5.125000000000000000e+01
4.600000000000000000e+01 7.152692307692307168e+02 2.355410461425781250e+02 -1.414184570312500000e+00 0.000000000000000000e+00 5.294117927551269531e-01 2.311811279296875000e+03 8.820083737373352051e-01 4.000000000000000000e+00 3.799738159179687500e+02 -9.375000000000000000e+01 5.125000000000000000e+01
5.200000000000000000e+01 8.228153846153846871e+02 3.139393615722656250e+02 -1.777130126953125000e+00 9.999999776482582092e-03 5.882353186607360840e-01 2.188763671875000000e+03 2.082397222518920898e+00 4.000000000000000000e+00 3.911296081542968750e+02 -9.125000000000000000e+01 5.125000000000000000e+01
3.900000000000000000e+01 8.316461538461537657e+02 2.800770874023437500e+02 -1.894348144531250000e+00 9.999999776482582092e-03 5.882353186607360840e-01 2.138008056640625000e+03 1.964935302734375000e+00 3.000000000000000000e+00 3.691405029296875000e+02 -8.975000000000000000e+01 5.125000000000000000e+01
6.100000000000000000e+01 8.017846153846153356e+02 2.814400329589843750e+02 -1.955261230468750000e+00 9.999999776482582092e-03 2.941176593303680420e-01 2.122776123046875000e+03 1.281076788902282715e+00 4.000000000000000000e+00 3.497615051269531250e+02 -8.925000000000000000e+01 5.125000000000000000e+01
5.700000000000000000e+01 7.713538461538457796e+02 2.853889465332031250e+02 -2.016143798828125000e+00 9.999999776482582092e-03 2.941176593303680420e-01 2.107544189453125000e+03 1.006112575531005859e+00 4.000000000000000000e+00 3.575291137695312500e+02 -8.875000000000000000e+01 5.125000000000000000e+01
6.100000000000000000e+01 6.884923076923076906e+02 3.407269287109375000e+02 -2.408996582031250000e+00 9.999999776482582092e-03 2.941176593303680420e-01 2.047984252929687500e+03 1.659580230712890625e+00 4.000000000000000000e+00 1.941662139892578125e+02 -8.625000000000000000e+01 5.125000000000000000e+01
2.000000000000000000e+01 6.539923076923075769e+02 3.975270690917968750e+02 -2.360717773437500000e+00 9.999999776482582092e-03 5.882353186607360840e-01 2.061028076171875000e+03 1.943559527397155762e+00 3.000000000000000000e+00 9.502926635742187500e+01 -8.375000000000000000e+01 5.125000000000000000e+01
5.200000000000000000e+01 6.581769230769230035e+02 3.894067382812500000e+02 -2.257110595703125000e+00 9.999999776482582092e-03 2.941176593303680420e-01 2.069686767578125000e+03 1.939094662666320801e+00 4.000000000000000000e+00 8.865423583984375000e+01 -8.325000000000000000e+01 5.125000000000000000e+01
6.200000000000000000e+01 6.566307692307692605e+02 3.388959045410156250e+02 -2.679718017578125000e+00 9.999999776482582092e-03 5.882352963089942932e-02 1.754027587890625000e+03 1.888148903846740723e+00 4.000000000000000000e+00 1.516192245483398438e+01 -8.075000000000000000e+01 5.125000000000000000e+01
4.900000000000000000e+01 7.248769230769229353e+02 3.877942199707031250e+02 -2.232513427734375000e+00 9.999999776482582092e-03 5.294117927551269531e-01 1.997180664062500000e+03 7.643096446990966797e-01 4.000000000000000000e+00 1.004303207397460938e+02 -7.825000000000000000e+01 5.125000000000000000e+01
2.000000000000000000e+01 7.513000000000002956e+02 4.091109313964843750e+02 -2.434112548828125000e+00 1.099888533353805542e-01 6.470588445663452148e-01 1.957336914062500000e+03 7.577934861183166504e-01 3.000000000000000000e+00 2.157283630371093750e+02 -7.775000000000000000e+01 5.125000000000000000e+01
2.100000000000000000e+01 7.662692307692310578e+02 4.265771484375000000e+02 -2.635711669921875000e+00 1.039507314562797546e-01 2.941176593303680420e-01 1.917493041992187500e+03 7.547930479049682617e-01 3.000000000000000000e+00 2.370303497314453125e+02 -7.725000000000000000e+01 5.125000000000000000e+01
4.100000000000000000e+01 7.816538461538461888e+02 4.406922912597656250e+02 -2.837158203125000000e+00 1.126414835453033447e-01 2.941176593303680420e-01 1.878429077148437500e+03 7.536458969116210938e-01 3.000000000000000000e+00 2.621594238281250000e+02 -7.675000000000000000e+01 5.125000000000000000e+01
5.500000000000000000e+01 8.265538461538460524e+02 4.966147766113281250e+02 -3.440185546875000000e+00 1.238401085138320923e-01 7.058823704719543457e-01 1.768255493164062500e+03 1.747719883918762207e+00 4.000000000000000000e+00 3.234350585937500000e+02 -7.525000000000000000e+01 5.125000000000000000e+01
3.900000000000000000e+01 8.395153846153843915e+02 5.024342041015625000e+02 -3.587951660156250000e+00 1.307751834392547607e-01 8.235294222831726074e-01 1.736733642578125000e+03 1.065185189247131348e+00 3.000000000000000000e+00 3.379307861328125000e+02 -7.475000000000000000e+01 5.125000000000000000e+01
3.200000000000000000e+01 8.503153846153848008e+02 4.990506286621093750e+02 -3.682495117187500000e+00 1.279345005750656128e-01 8.235294222831726074e-01 1.710414306640625000e+03 1.305231928825378418e+00 3.000000000000000000e+00 3.731191711425781250e+02 -7.425000000000000000e+01 5.125000000000000000e+01
6.300000000000000000e+01 9.345769230769232081e+02 4.033052673339843750e+02 -3.780456542968750000e+00 2.423627823591232300e-01 2.941176593303680420e-01 1.614542480468750000e+03 7.064871191978454590e-01 4.000000000000000000e+00 5.905162353515625000e+02 -7.175000000000000000e+01 5.125000000000000000e+01
5.600000000000000000e+01 9.701846153846151992e+02 3.995542297363281250e+02 -3.683776855468750000e+00 1.903680115938186646e-01 6.470588445663452148e-01 1.597634033203125000e+03 1.579280257225036621e+00 4.000000000000000000e+00 5.521074218750000000e+02 -7.075000000000000000e+01 5.125000000000000000e+01
5.700000000000000000e+01 1.049523076923076587e+03 4.426482849121093750e+02 -3.481414794921875000e+00 1.789456605911254883e-01 5.882353186607360840e-01 1.592896240234375000e+03 1.778933286666870117e+00 4.000000000000000000e+00 5.382864990234375000e+02 -6.875000000000000000e+01 5.125000000000000000e+01
5.700000000000000000e+01 1.067200000000000273e+03 5.321795043945312500e+02 -3.218261718750000000e+00 2.507760226726531982e-01 2.352941185235977173e-01 1.619543090820312500e+03 1.667085170745849609e+00 4.000000000000000000e+00 6.833673095703125000e+02 -6.675000000000000000e+01 5.125000000000000000e+01
5.200000000000000000e+01 9.399461538461539476e+02 5.468282470703125000e+02 -2.852661132812500000e+00 1.599492281675338745e-01 3.529411852359771729e-01 1.652648681640625000e+03 1.636385321617126465e+00 4.000000000000000000e+00 5.574034423828125000e+02 -6.525000000000000000e+01 5.125000000000000000e+01
4.600000000000000000e+01 1.035476923076922958e+03 5.199673461914062500e+02 -2.354583740234375000e+00 2.093195617198944092e-01 2.941176593303680420e-01 1.686471435546875000e+03 1.570714235305786133e+00 4.000000000000000000e+00 5.651628417968750000e+02 -6.375000000000000000e+01 5.125000000000000000e+01
4.200000000000000000e+01 1.104107692307692332e+03 4.672578125000000000e+02 -4.586181640625000000e-01 9.999999776482582092e-03 2.941176593303680420e-01 1.639869995117187500e+03 1.650993704795837402e+00 3.000000000000000000e+00 3.716044311523437500e+02 -6.025000000000000000e+01 5.125000000000000000e+01
4.600000000000000000e+01 6.754692307692305349e+02 2.217744140625000000e+02 -1.399688720703125000e+00 0.000000000000000000e+00 5.294117927551269531e-01 2.328496337890625000e+03 8.926151990890502930e-01 4.000000000000000000e+00 3.568327331542968750e+02 -9.475000000000000000e+01 5.175000000000000000e+01
7.000000000000000000e+01 7.268230769230768828e+02 2.359168243408203125e+02 -1.844024658203125000e+00 9.999999776482582092e-03 2.352941185235977173e-01 2.231861816406250000e+03 8.540167808532714844e-01 4.000000000000000000e+00 3.710452270507812500e+02 -9.325000000000000000e+01 5.175000000000000000e+01
4.700000000000000000e+01 7.997923076923077588e+02 2.794877014160156250e+02 -2.197540283203125000e+00 9.999999776482582092e-03 1.176470592617988586e-01 2.130913085937500000e+03 2.050609588623046875e+00 4.000000000000000000e+00 4.109045410156250000e+02 -9.125000000000000000e+01 5.175000000000000000e+01
6.300000000000000000e+01 7.947000000000002728e+02 2.799619750976562500e+02 -2.505615234375000000e+00 9.999999776482582092e-03 2.941176593303680420e-01 2.056325195312500000e+03 1.930334210395812988e+00 4.000000000000000000e+00 3.554184265136718750e+02 -8.925000000000000000e+01 5.175000000000000000e+01
6.100000000000000000e+01 7.654230769230770193e+02 2.804002685546875000e+02 -2.596862792968750000e+00 1.122075244784355164e-01 1.764705926179885864e-01 2.039029785156250000e+03 1.929625868797302246e+00 4.000000000000000000e+00 3.413318786621093750e+02 -8.875000000000000000e+01 5.175000000000000000e+01
3.000000000000000000e+01 6.987461538461539021e+02 2.905015563964843750e+02 -2.917419433593750000e+00 9.999999776482582092e-03 5.882352963089942932e-02 1.987785278320312500e+03 1.769243359565734863e+00 3.000000000000000000e+00 2.208514251708984375e+02 -8.675000000000000000e+01 5.175000000000000000e+01
4.500000000000000000e+01 6.779153846153848235e+02 2.941304626464843750e+02 -2.992492675781250000e+00 9.999999776482582092e-03 2.352941185235977173e-01 1.977012329101562500e+03 1.949947953224182129e+00 4.000000000000000000e+00 1.739680328369140625e+02 -8.625000000000000000e+01 5.175000000000000000e+01
2.700000000000000000e+01 7.294153846153844825e+02 3.825723876953125000e+02 -2.652862548828125000e+00 1.190177798271179199e-01 5.882353186607360840e-01 1.908853515625000000e+03 7.451215982437133789e-01 3.000000000000000000e+00 1.578467102050781250e+02 -7.775000000000000000e+01 5.175000000000000000e+01
1.300000000000000000e+01 7.470538461538463935e+02 3.991633911132812500e+02 -2.890136718750000000e+00 1.287701874971389771e-01 1.117647051811218262e+00 1.866002563476562500e+03 7.388435602188110352e-01 2.000000000000000000e+00 1.890024108886718750e+02 -7.725000000000000000e+01 5.175000000000000000e+01
3.900000000000000000e+01 7.868153846153849145e+02 4.101763610839843750e+02 -3.126312255859375000e+00 1.496048718690872192e-01 1.117647051811218262e+00 1.824170776367187500e+03 7.282211780548095703e-01 3.000000000000000000e+00 2.167120971679687500e+02 -7.675000000000000000e+01 5.175000000000000000e+01
2.100000000000000000e+01 8.018153846153844597e+02 4.264878845214843750e+02 -3.359161376953125000e+00 1.494865864515304565e-01 8.823529481887817383e-01 1.785396606445312500e+03 7.249160408973693848e-01 3.000000000000000000e+00 2.480408325195312500e+02 -7.625000000000000000e+01 5.175000000000000000e+01
2.500000000000000000e+01 7.938923076923080089e+02 4.564768676757812500e+02 -3.591979980468750000e+00 1.600692570209503174e-01 5.882353186607360840e-01 1.746622436523437500e+03 1.172315955162048340e+00 3.000000000000000000e+00 2.887433471679687500e+02 -7.575000000000000000e+01 5.175000000000000000e+01
1.700000000000000000e+01 8.116153846153848690e+02 4.760712585449218750e+02 -3.824829101562500000e+00 1.709001511335372925e-01 6.470588445663452148e-01 1.707848266601562500e+03 1.785909652709960938e+00 2.000000000000000000e+00 3.040672302246093750e+02 -7.525000000000000000e+01 5.175000000000000000e+01
3.300000000000000000e+01 8.319076923076924004e+02 4.792500000000000000e+02 -3.992218017578125000e+00 1.741609722375869751e-01 6.470588445663452148e-01 1.675147949218750000e+03 1.766375422477722168e+00 3.000000000000000000e+00 3.550698852539062500e+02 -7.475000000000000000e+01 5.175000000000000000e+01
2.000000000000000000e+01 8.778846153846151310e+02 4.544583740234375000e+02 -4.196044921875000000e+00 2.027455866336822510e-01 7.058823704719543457e-01 1.621895019531250000e+03 1.108539104461669922e+00 3.000000000000000000e+00 3.644943847656250000e+02 -7.375000000000000000e+01 5.175000000000000000e+01
2.800000000000000000e+01 8.781384615384615699e+02 4.276207885742187500e+02 -4.297973632812500000e+00 2.097456902265548706e-01 2.941176593303680420e-01 1.595268432617187500e+03 7.013915777206420898e-01 3.000000000000000000e+00 4.004848937988281250e+02 -7.325000000000000000e+01 5.175000000000000000e+01
4.200000000000000000e+01 8.718461538461541522e+02 4.129934082031250000e+02 -4.289978027343750000e+00 4.246814250946044922e-01 9.411764740943908691e-01 1.577469482421875000e+03 7.028717994689941406e-01 3.000000000000000000e+00 7.321055908203125000e+02 -7.275000000000000000e+01 5.175000000000000000e+01
3.700000000000000000e+01 8.955692307692307850e+02 4.098009643554687500e+02 -4.245330810546875000e+00 3.465285897254943848e-01 7.058823704719543457e-01 1.562612792968750000e+03 6.927921175956726074e-01 3.000000000000000000e+00 6.887566528320312500e+02 -7.225000000000000000e+01 5.175000000000000000e+01
2.300000000000000000e+01 9.206846153846150855e+02 4.029869689941406250e+02 -4.156066894531250000e+00 2.767788171768188477e-01 5.882353186607360840e-01 1.532899658203125000e+03 1.176972508430480957e+00 3.000000000000000000e+00 5.872561645507812500e+02 -7.125000000000000000e+01 5.175000000000000000e+01
2.300000000000000000e+01 9.583230769230772239e+02 4.095215148925781250e+02 -4.110290527343750000e+00 3.187821209430694580e-01 6.470588445663452148e-01 1.526789672851562500e+03 1.397296190261840820e+00 3.000000000000000000e+00 6.657482299804687500e+02 -7.075000000000000000e+01 5.175000000000000000e+01
3.800000000000000000e+01 9.647769230769231399e+02 4.187834777832031250e+02 -4.064483642578125000e+00 2.708097100257873535e-01 2.941176593303680420e-01 1.520679687500000000e+03 1.472786426544189453e+00 3.000000000000000000e+00 5.459584960937500000e+02 -7.025000000000000000e+01 5.175000000000000000e+01
4.000000000000000000e+01 9.901615384615391804e+02 4.235581665039062500e+02 -4.018676757812500000e+00 2.183318585157394409e-01 2.941176593303680420e-01 1.514569702148437500e+03 1.146573781967163086e+00 3.000000000000000000e+00 5.573703613281250000e+02 -6.975000000000000000e+01 5.175000000000000000e+01
6.600000000000000000e+01 1.090684615384615199e+03 4.618108520507812500e+02 -3.997467041015625000e+00 2.732339799404144287e-01 5.882353186607360840e-01 1.506714355468750000e+03 1.480509877204895020e+00 4.000000000000000000e+00 5.400775756835937500e+02 -6.825000000000000000e+01 5.175000000000000000e+01
2.300000000000000000e+01 8.330923076923079407e+02 5.000891113281250000e+02 -3.810241699218750000e+00 3.155253529548645020e-01 6.470588445663452148e-01 1.532558959960937500e+03 1.628576517105102539e+00 3.000000000000000000e+00 6.610869140625000000e+02 -6.525000000000000000e+01 5.175000000000000000e+01
4.900000000000000000e+01 9.762846153846154493e+02 4.674471740722656250e+02 -3.579467773437500000e+00 3.731388747692108154e-01 5.882353186607360840e-01 1.553112915039062500e+03 1.554082036018371582e+00 4.000000000000000000e+00 7.424209594726562500e+02 -6.425000000000000000e+01 5.175000000000000000e+01
1.200000000000000000e+01 1.085969230769231444e+03 4.726251831054687500e+02 -1.491485595703125000e+00 9.999999776482582092e-03 5.882353186607360840e-01 1.587677124023437500e+03 1.647513508796691895e+00 2.000000000000000000e+00 3.662077026367187500e+02 -6.025000000000000000e+01 5.175000000000000000e+01
5.000000000000000000e+01 1.084092307692307941e+03 5.393085327148437500e+02 -7.438659667968750000e-01 9.999999776482582092e-03 1.176470592617988586e-01 1.576596557617187500e+03 1.682635307312011719e+00 4.000000000000000000e+00 2.613114929199218750e+02 -5.875000000000000000e+01 5.175000000000000000e+01
3.700000000000000000e+01 6.434230769230773603e+02 1.042174148559570312e+02 -1.138519287109375000e+00 0.000000000000000000e+00 5.882352963089942932e-02 2.386224609375000000e+03 8.515228629112243652e-01 3.000000000000000000e+00 2.693585815429687500e+02 -9.625000000000000000e+01 5.225000000000000000e+01
3.100000000000000000e+01 6.444384615384616382e+02 1.223483123779296875e+02 -1.388610839843750000e+00 0.000000000000000000e+00 2.352941185235977173e-01 2.341361572265625000e+03 8.543316125869750977e-01 3.000000000000000000e+00 3.071921386718750000e+02 -9.575000000000000000e+01 5.225000000000000000e+01
2.600000000000000000e+01 6.496692307692303530e+02 1.619704132080078125e+02 -1.576721191406250000e+00 9.999999776482582092e-03 4.117647111415863037e-01 2.305644775390625000e+03 2.042025566101074219e+00 3.000000000000000000e+00 3.244425659179687500e+02 -9.525000000000000000e+01 5.225000000000000000e+01
4.600000000000000000e+01 6.734923076923073495e+02 2.296433868408203125e+02 -1.911590576171875000e+00 9.999999776482582092e-03 4.705882370471954346e-01 2.240308593750000000e+03 8.594893813133239746e-01 4.000000000000000000e+00 3.464235229492187500e+02 -9.425000000000000000e+01 5.225000000000000000e+01
6.000000000000000000e+01 7.515846153846152902e+02 2.513798217773437500e+02 -2.407958984375000000e+00 9.999999776482582092e-03 5.882352963089942932e-02 2.121638427734375000e+03 1.211502313613891602e+00 4.000000000000000000e+00 3.921123962402343750e+02 -9.225000000000000000e+01 5.225000000000000000e+01
5.500000000000000000e+01 7.732307692307693969e+02 2.643965454101562500e+02 -2.515747070312500000e+00 1.086587756872177124e-01 8.823529481887817383e-01 2.094722900390625000e+03 1.244888782501220703e+00 4.000000000000000000e+00 4.108261413574218750e+02 -9.175000000000000000e+01 5.225000000000000000e+01
3.600000000000000000e+01 7.957692307692306031e+02 2.744040527343750000e+02 -2.822448730468750000e+00 9.999999776482582092e-03 5.882353186607360840e-01 2.029742187500000000e+03 1.974117875099182129e+00 3.000000000000000000e+00 3.350610351562500000e+02 -9.025000000000000000e+01 5.225000000000000000e+01
5.300000000000000000e+01 7.681999999999997044e+02 2.773247375488281250e+02 -3.055999755859375000e+00 1.096836999058723450e-01 5.882353186607360840e-01 1.989874145507812500e+03 1.939920067787170410e+00 4.000000000000000000e+00 2.918075866699218750e+02 -8.925000000000000000e+01 5.225000000000000000e+01
6.300000000000000000e+01 7.279769230769236401e+02 2.770460510253906250e+02 -3.299255371093750000e+00 1.233230829238891602e-01 2.941176593303680420e-01 1.951156738281250000e+03 1.933636188507080078e+00 4.000000000000000000e+00 2.520926513671875000e+02 -8.825000000000000000e+01 5.225000000000000000e+01
5.900000000000000000e+01 6.372076923076923549e+02 2.920209045410156250e+02 -3.369140625000000000e+00 1.367470026016235352e-01 5.294117927551269531e-01 1.918243041992187500e+03 1.894285559654235840e+00 4.000000000000000000e+00 1.554116058349609375e+02 -8.475000000000000000e+01 5.225000000000000000e+01
3.200000000000000000e+01 6.221538461538460751e+02 3.115459289550781250e+02 -3.267242431640625000e+00 1.257717162370681763e-01 2.941176593303680420e-01 1.924666748046875000e+03 1.888614773750305176e+00 3.000000000000000000e+00 1.271269683837890625e+02 -8.425000000000000000e+01 5.225000000000000000e+01
5.200000000000000000e+01 7.152307692307695106e+02 3.755381469726562500e+02 -2.871612548828125000e+00 1.451748162508010864e-01 4.117647111415863037e-01 1.860370117187500000e+03 7.304226160049438477e-01 4.000000000000000000e+00 1.307817840576171875e+02 -7.775000000000000000e+01 5.225000000000000000e+01
3.500000000000000000e+01 7.376076923076921048e+02 3.829247131347656250e+02 -3.144561767578125000e+00 1.770375072956085205e-01 2.941176593303680420e-01 1.814512084960937500e+03 7.210268974304199219e-01 3.000000000000000000e+00 1.767404937744140625e+02 -7.725000000000000000e+01 5.225000000000000000e+01
1.900000000000000000e+01 7.715999999999996817e+02 3.868736877441406250e+02 -3.415435791015625000e+00 2.117312997579574585e-01 5.882353186607360840e-01 1.769912597656250000e+03 7.099088430404663086e-01 2.000000000000000000e+00 2.339751586914062500e+02 -7.675000000000000000e+01 5.225000000000000000e+01
5.100000000000000000e+01 7.862692307692307168e+02 3.892125549316406250e+02 -3.680145263671875000e+00 1.849405467510223389e-01 2.941176593303680420e-01 1.729088745117187500e+03 7.064110040664672852e-01 4.000000000000000000e+00 2.368056945800781250e+02 -7.625000000000000000e+01 5.225000000000000000e+01
4.400000000000000000e+01 7.900384615384616609e+02 3.962476501464843750e+02 -3.944824218750000000e+00 1.907654553651809692e-01 9.411764740943908691e-01 1.688264892578125000e+03 9.010095596313476562e-01 3.000000000000000000e+00 2.749458007812500000e+02 -7.575000000000000000e+01 5.225000000000000000e+01
4.500000000000000000e+01 7.955692307692307850e+02 4.055935974121093750e+02 -4.209503173828125000e+00 2.120041847229003906e-01 6.470588445663452148e-01 1.647441040039062500e+03 7.306227684020996094e-01 4.000000000000000000e+00 2.878169555664062500e+02 -7.525000000000000000e+01 5.225000000000000000e+01
3.100000000000000000e+01 8.713153846153846871e+02 4.032855834960937500e+02 -4.615051269531250000e+00 2.757488489151000977e-01 7.058823704719543457e-01 1.559695068359375000e+03 1.511428356170654297e+00 3.000000000000000000e+00 3.833216552734375000e+02 -7.375000000000000000e+01 5.225000000000000000e+01
2.300000000000000000e+01 8.922538461538465526e+02 4.010682983398437500e+02 -4.716033935546875000e+00 3.130624592304229736e-01 5.882353186607360840e-01 1.513739501953125000e+03 6.618939042091369629e-01 3.000000000000000000e+00 4.525880737304687500e+02 -7.275000000000000000e+01 5.225000000000000000e+01
2.400000000000000000e+01 9.471076923076924459e+02 4.028698730468750000e+02 -4.668487548828125000e+00 4.119878113269805908e-01 6.470588445663452148e-01 1.497354736328125000e+03 6.883936524391174316e-01 3.000000000000000000e+00 5.373118896484375000e+02 -7.225000000000000000e+01 5.225000000000000000e+01
5.300000000000000000e+01 9.793999999999997499e+02 4.044702148437500000e+02 -4.620941162109375000e+00 5.262298583984375000e-01 8.235294222831726074e-01 1.480970092773437500e+03 8.974688649177551270e-01 4.000000000000000000e+00 6.140061645507812500e+02 -7.175000000000000000e+01 5.225000000000000000e+01
1.300000000000000000e+01 9.609923076923075769e+02 4.060129699707031250e+02 -4.573394775390625000e+00 4.324540495872497559e-01 2.941176593303680420e-01 1.464585449218750000e+03 1.023501276969909668e+00 2.000000000000000000e+00 6.834646606445312500e+02 -7.125000000000000000e+01 5.225000000000000000e+01
3.400000000000000000e+01 9.935230769230765873e+02 4.113898620605468750e+02 -4.536773681640625000e+00 6.456978321075439453e-01 2.941176593303680420e-01 1.455945312500000000e+03 1.219814896583557129e+00 3.000000000000000000e+00 8.649734497070312500e+02 -7.075000000000000000e+01 5.225000000000000000e+01
2.900000000000000000e+01 9.855538461538459387e+02 4.416241149902343750e+02 -4.449218750000000000e+00 3.652600944042205811e-01 5.882353186607360840e-01 1.430436279296875000e+03 1.613513588905334473e+00 3.000000000000000000e+00 6.627029418945312500e+02 -6.925000000000000000e+01 5.225000000000000000e+01
5.200000000000000000e+01 9.791769230769234582e+02 4.828850097656250000e+02 -4.657836914062500000e+00 3.442216813564300537e-01 2.941176593303680420e-01 1.405895629882812500e+03 1.223823308944702148e+00 4.000000000000000000e+00 6.593026123046875000e+02 -6.725000000000000000e+01 5.225000000000000000e+01
5.100000000000000000e+01 8.969230769230767919e+02 4.839289550781250000e+02 -4.706604003906250000e+00 3.013567030429840088e-01 2.941176593303680420e-01 1.405776855468750000e+03 1.563863754272460938e+00 4.000000000000000000e+00 5.849812011718750000e+02 -6.675000000000000000e+01 5.225000000000000000e+01
4.700000000000000000e+01 9.292999999999994998e+02 3.921983642578125000e+02 -4.573608398437500000e+00 2.160229980945587158e-01 2.352941185235977173e-01 1.440308349609375000e+03 1.604052305221557617e+00 4.000000000000000000e+00 4.947520446777343750e+02 -6.375000000000000000e+01 5.225000000000000000e+01
6.900000000000000000e+01 1.067169230769231717e+03 4.853880615234375000e+02 -2.896545410156250000e+00 1.389860808849334717e-01 2.352941185235977173e-01 1.523227050781250000e+03 1.629170417785644531e+00 4.000000000000000000e+00 3.710461730957031250e+02 -6.075000000000000000e+01 5.225000000000000000e+01
6.700000000000000000e+01 1.117169230769230353e+03 5.130500488281250000e+02 -2.177520751953125000e+00 1.532130539417266846e-01 2.941176593303680420e-01 1.544548950195312500e+03 1.592378735542297363e+00 4.000000000000000000e+00 4.391159057617187500e+02 -5.975000000000000000e+01 5.225000000000000000e+01
6.200000000000000000e+01 6.298230769230769965e+02 1.225549392700195312e+02 -1.649658203125000000e+00 0.000000000000000000e+00 5.882353186607360840e-01 2.312769531250000000e+03 8.392591476440429688e-01 4.000000000000000000e+00 2.684009094238281250e+02 -9.625000000000000000e+01 5.275000000000000000e+01
6.800000000000000000e+01 6.358230769230769965e+02 1.531148223876953125e+02 -1.899169921875000000e+00 9.999999776482582092e-03 8.823529481887817383e-01 2.271010498046875000e+03 8.420237898826599121e-01 4.000000000000000000e+00 2.983446960449218750e+02 -9.575000000000000000e+01 5.275000000000000000e+01
3.500000000000000000e+01 6.674153846153848235e+02 2.610229187011718750e+02 -2.381195068359375000e+00 9.999999776482582092e-03 7.647058963775634766e-01 2.174449707031250000e+03 8.358255624771118164e-01 3.000000000000000000e+00 3.272039184570312500e+02 -9.425000000000000000e+01 5.275000000000000000e+01
5.600000000000000000e+01 7.119846153846153811e+02 2.704045104980468750e+02 -2.626342773437500000e+00 9.999999776482582092e-03 3.529411852359771729e-01 2.116957031250000000e+03 8.346176743507385254e-01 4.000000000000000000e+00 3.143724365234375000e+02 -9.325000000000000000e+01 5.275000000000000000e+01
6.700000000000000000e+01 7.149615384615384528e+02 2.663558349609375000e+02 -2.718872070312500000e+00 9.999999776482582092e-03 5.882353186607360840e-01 2.090781005859375000e+03 1.008666872978210449e+00 4.000000000000000000e+00 3.087387084960937500e+02 -9.275000000000000000e+01 5.275000000000000000e+01
5.300000000000000000e+01 7.573538461538458932e+02 2.642536315917968750e+02 -3.001190185546875000e+00 1.373559385538101196e-01 4.117647111415863037e-01 2.017805419921875000e+03 1.940058231353759766e+00 4.000000000000000000e+00 3.313486938476562500e+02 -9.125000000000000000e+01 5.275000000000000000e+01
3.900000000000000000e+01 7.460461538461538566e+02 2.653229675292968750e+02 -3.304443359375000000e+00 1.437240839004516602e-01 2.352941185235977173e-01 1.952621459960937500e+03 1.927894949913024902e+00 3.000000000000000000e+00 2.833059082031250000e+02 -8.975000000000000000e+01 5.275000000000000000e+01
6.500000000000000000e+01 7.372538461538462116e+02 2.622814941406250000e+02 -3.429290771484375000e+00 1.475285291671752930e-01 5.882352963089942932e-02 1.930923339843750000e+03 1.918569684028625488e+00 4.000000000000000000e+00 2.723562316894531250e+02 -8.925000000000000000e+01 5.275000000000000000e+01
5.300000000000000000e+01 7.107923076923078725e+02 2.684473266601562500e+02 -3.679016113281250000e+00 1.732140183448791504e-01 1.176470592617988586e-01 1.887526977539062500e+03 1.906288862228393555e+00 4.000000000000000000e+00 2.437927093505859375e+02 -8.825000000000000000e+01 5.275000000000000000e+01
3.100000000000000000e+01 6.332692307692306031e+02 2.720780639648437500e+02 -3.811676025390625000e+00 1.738470494747161865e-01 2.352941185235977173e-01 1.833864257812500000e+03 1.867064237594604492e+00 3.000000000000000000e+00 1.412233734130859375e+02 -8.525000000000000000e+01 5.275000000000000000e+01
3.000000000000000000e+01 6.053461538461538112e+02 2.846905212402343750e+02 -3.632995605468750000e+00 1.601949185132980347e-01 5.882353186607360840e-01 1.839464355468750000e+03 1.853041768074035645e+00 3.000000000000000000e+00 9.759201049804687500e+01 -8.425000000000000000e+01 5.275000000000000000e+01
1.200000000000000000e+01 5.899307692307691013e+02 3.188478698730468750e+02 -3.235107421875000000e+00 1.553585827350616455e-01 3.529411852359771729e-01 1.863011230468750000e+03 1.831408619880676270e+00 2.000000000000000000e+00 4.284396362304687500e+01 -8.325000000000000000e+01 5.275000000000000000e+01
2.900000000000000000e+01 7.795923076923075996e+02 3.816817626953125000e+02 -4.250793457031250000e+00 2.527895867824554443e-01 5.882353186607360840e-01 1.626513793945312500e+03 6.894083619117736816e-01 3.000000000000000000e+00 2.599295959472656250e+02 -7.575000000000000000e+01 5.275000000000000000e+01
2.000000000000000000e+01 7.870230769230770420e+02 3.809543151855468750e+02 -4.509155273437500000e+00 2.714009582996368408e-01 5.882353186607360840e-01 1.589138549804687500e+03 6.834262609481811523e-01 3.000000000000000000e+00 2.890841674804687500e+02 -7.525000000000000000e+01 5.275000000000000000e+01
4.100000000000000000e+01 8.292923076923077588e+02 3.821936035156250000e+02 -4.689697265625000000e+00 3.361473381519317627e-01 3.529411852359771729e-01 1.558064575195312500e+03 6.689332723617553711e-01 3.000000000000000000e+00 3.693159484863281250e+02 -7.475000000000000000e+01 5.275000000000000000e+01
5.100000000000000000e+01 8.382769230769222304e+02 3.863203735351562500e+02 -4.792388916015625000e+00 3.721698522567749023e-01 8.823529481887817383e-01 1.533292236328125000e+03 6.609249711036682129e-01 4.000000000000000000e+00 3.722649841308593750e+02 -7.425000000000000000e+01 5.275000000000000000e+01
1.700000000000000000e+01 8.575923076923079407e+02 3.925819702148437500e+02 -4.997772216796875000e+00 4.324283003807067871e-01 2.941176593303680420e-01 1.483747436523437500e+03 6.550968289375305176e-01 2.000000000000000000e+00 4.755109558105468750e+02 -7.325000000000000000e+01 5.275000000000000000e+01
1.600000000000000000e+01 8.710615384615377934e+02 3.954797363281250000e+02 -4.988983154296875000e+00 3.816587626934051514e-01 8.823529481887817383e-01 1.465323852539062500e+03 6.486997008323669434e-01 2.000000000000000000e+00 4.891681213378906250e+02 -7.275000000000000000e+01 5.275000000000000000e+01
2.400000000000000000e+01 8.935846153846157449e+02 3.993074951171875000e+02 -4.943054199218750000e+00 3.741276860237121582e-01 2.941176593303680420e-01 1.449016479492187500e+03 7.367696166038513184e-01 3.000000000000000000e+00 4.714584045410156250e+02 -7.225000000000000000e+01 5.275000000000000000e+01
4.000000000000000000e+01 9.501076923076926732e+02 4.025619506835937500e+02 -4.897094726562500000e+00 4.496317803859710693e-01 7.647058963775634766e-01 1.432709228515625000e+03 1.047899127006530762e+00 3.000000000000000000e+00 5.595378417968750000e+02 -7.175000000000000000e+01 5.275000000000000000e+01
2.500000000000000000e+01 9.308615384615384301e+02 4.047433471679687500e+02 -4.851165771484375000e+00 4.405549168586730957e-01 3.529411852359771729e-01 1.416401855468750000e+03 1.086697459220886230e+00 3.000000000000000000e+00 5.636305541992187500e+02 -7.125000000000000000e+01 5.275000000000000000e+01
7.000000000000000000e+00 9.495846153846155175e+02 4.395285949707031250e+02 -4.781890869140625000e+00 3.900029957294464111e-01 2.941176593303680420e-01 1.385485717773437500e+03 1.344387888908386230e+00 1.000000000000000000e+00 6.316572875976562500e+02 -6.975000000000000000e+01 5.275000000000000000e+01
1.600000000000000000e+01 9.649076923076922867e+02 4.768474426269531250e+02 -4.936614990234375000e+00 3.820409178733825684e-01 2.941176593303680420e-01 1.356875854492187500e+03 1.326101064682006836e+00 2.000000000000000000e+00 6.478508300781250000e+02 -6.825000000000000000e+01 5.275000000000000000e+01
2.600000000000000000e+01 9.176615384615381572e+02 4.800156250000000000e+02 -5.088928222656250000e+00 5.171590447425842285e-01 5.882352963089942932e-02 1.341975830078125000e+03 9.452934265136718750e-01 3.000000000000000000e+00 6.918314819335937500e+02 -6.725000000000000000e+01 5.275000000000000000e+01
1.200000000000000000e+01 8.828846153846159268e+02 4.801407165527343750e+02 -5.164154052734375000e+00 3.504050374031066895e-01 2.941176593303680420e-01 1.340016723632812500e+03 1.340147614479064941e+00 2.000000000000000000e+00 6.053684082031250000e+02 -6.675000000000000000e+01 5.275000000000000000e+01
3.100000000000000000e+01 5.953230769230769965e+02 1.754204864501953125e+02 -1.989898681640625000e+00 9.999999776482582092e-03 2.352941185235977173e-01 2.268322021484375000e+03 9.838526844978332520e-01 3.000000000000000000e+00 2.564339599609375000e+02 -9.675000000000000000e+01 5.325000000000000000e+01
2.700000000000000000e+01 6.227461538461539021e+02 2.169930877685546875e+02 -2.466827392578125000e+00 9.999999776482582092e-03 2.941176593303680420e-01 2.196139648437500000e+03 1.356735467910766602e+00 3.000000000000000000e+00 3.003039245605468750e+02 -9.575000000000000000e+01 5.325000000000000000e+01
4.200000000000000000e+01 6.332076923076923549e+02 2.555144958496093750e+02 -2.627441406250000000e+00 9.999999776482582092e-03 6.470588445663452148e-01 2.164546630859375000e+03 8.248863220214843750e-01 3.000000000000000000e+00 2.995675964355468750e+02 -9.525000000000000000e+01 5.325000000000000000e+01
6.500000000000000000e+01 6.458615384615382027e+02 2.839701538085937500e+02 -2.762145996093750000e+00 9.999999776482582092e-03 2.352941185235977173e-01 2.134452880859375000e+03 8.243936300277709961e-01 4.000000000000000000e+00 3.031457824707031250e+02 -9.475000000000000000e+01 5.325000000000000000e+01
5.300000000000000000e+01 6.555769230769230944e+02 2.979230041503906250e+02 -2.896820068359375000e+00 9.999999776482582092e-03 5.294117927551269531e-01 2.104359375000000000e+03 8.218062520027160645e-01 4.000000000000000000e+00 3.032281799316406250e+02 -9.425000000000000000e+01 5.325000000000000000e+01
6.600000000000000000e+01 6.665538461538458250e+02 3.026637573242187500e+02 -3.031494140625000000e+00 9.999999776482582092e-03 8.235294222831726074e-01 2.074265625000000000e+03 8.786289691925048828e-01 4.000000000000000000e+00 2.834273376464843750e+02 -9.375000000000000000e+01 5.325000000000000000e+01
5.000000000000000000e+01 6.751153846153849827e+02 3.012684936523437500e+02 -3.096618652343750000e+00 1.132126897573471069e-01 2.352941185235977173e-01 2.051737304687500000e+03 1.876030206680297852e+00 4.000000000000000000e+00 3.010188903808593750e+02 -9.325000000000000000e+01 5.325000000000000000e+01
3.000000000000000000e+01 6.954615384615387939e+02 2.943443908691406250e+02 -3.161773681640625000e+00 1.206141486763954163e-01 8.235294222831726074e-01 2.029208984375000000e+03 1.216523289680480957e+00 3.000000000000000000e+00 3.080261840820312500e+02 -9.275000000000000000e+01 5.325000000000000000e+01
2.300000000000000000e+01 7.126153846153848690e+02 2.493943939208984375e+02 -3.294860839843750000e+00 1.506759375333786011e-01 2.352941185235977173e-01 1.984519287109375000e+03 1.947623014450073242e+00 3.000000000000000000e+00 3.067828979492187500e+02 -9.175000000000000000e+01 5.325000000000000000e+01
4.700000000000000000e+01 7.114846153846154948e+02 2.422872619628906250e+02 -3.371368408203125000e+00 1.507180333137512207e-01 2.352941185235977173e-01 1.963458618164062500e+03 1.930460691452026367e+00 4.000000000000000000e+00 2.805092468261718750e+02 -9.125000000000000000e+01 5.325000000000000000e+01
3.400000000000000000e+01 7.164769230769231854e+02 2.420272674560546875e+02 -3.447845458984375000e+00 1.734083294868469238e-01 7.647058963775634766e-01 1.942397827148437500e+03 1.913836359977722168e+00 3.000000000000000000e+00 2.853598022460937500e+02 -9.075000000000000000e+01 5.325000000000000000e+01
6.500000000000000000e+01 6.999230769230769056e+02 2.343572692871093750e+02 -3.621856689453125000e+00 1.658741533756256104e-01 3.529411852359771729e-01 1.898739501953125000e+03 1.925303339958190918e+00 4.000000000000000000e+00 2.605407714843750000e+02 -8.975000000000000000e+01 5.325000000000000000e+01
2.800000000000000000e+01 6.921923076923075087e+02 2.317482452392578125e+02 -3.859008789062500000e+00 2.013199627399444580e-01 5.882353186607360840e-01 1.850470336914062500e+03 1.914539813995361328e+00 3.000000000000000000e+00 2.490290527343750000e+02 -8.875000000000000000e+01 5.325000000000000000e+01
2.300000000000000000e+01 5.938846153846156994e+02 2.632060852050781250e+02 -3.986175537109375000e+00 2.283959537744522095e-01 5.294117927551269531e-01 1.746767822265625000e+03 1.813731074333190918e+00 3.000000000000000000e+00 1.181062011718750000e+02 -8.425000000000000000e+01 5.325000000000000000e+01
1.900000000000000000e+01 6.746230769230768374e+02 3.849951782226562500e+02 -3.327209472656250000e+00 2.453102618455886841e-01 2.941176593303680420e-01 1.732989135742187500e+03 1.022059440612792969e+00 2.000000000000000000e+00 1.156008605957031250e+02 -7.825000000000000000e+01 5.325000000000000000e+01
3.100000000000000000e+01 7.025000000000000000e+02 3.870953979492187500e+02 -3.573028564453125000e+00 2.723836302757263184e-01 5.882353186607360840e-01 1.697562133789062500e+03 6.982901692390441895e-01 3.000000000000000000e+00 1.709339904785156250e+02 -7.775000000000000000e+01 5.325000000000000000e+01
3.600000000000000000e+01 7.795615384615385892e+02 3.770758972167968750e+02 -5.035156250000000000e+00 3.807469904422760010e-01 5.882353186607360840e-01 1.482958984375000000e+03 6.730504631996154785e-01 3.000000000000000000e+00 3.942628479003906250e+02 -7.425000000000000000e+01 5.325000000000000000e+01
3.400000000000000000e+01 7.832538461538462116e+02 3.831689453125000000e+02 -5.126312255859375000e+00 4.209083616733551025e-01 3.529411852359771729e-01 1.461214233398437500e+03 6.720018386840820312e-01 3.000000000000000000e+00 4.429633789062500000e+02 -7.375000000000000000e+01 5.325000000000000000e+01
2.900000000000000000e+01 7.911769230769231172e+02 3.895017089843750000e+02 -5.217498779296875000e+00 3.786080181598663330e-01 8.823529481887817383e-01 1.439469360351562500e+03 6.686392426490783691e-01 3.000000000000000000e+00 4.351137390136718750e+02 -7.325000000000000000e+01 5.325000000000000000e+01
2.200000000000000000e+01 8.076461538461537657e+02 3.925545654296875000e+02 -5.208221435546875000e+00 4.120880961418151855e-01 6.470588445663452148e-01 1.422283325195312500e+03 6.634044647216796875e-01 3.000000000000000000e+00 4.853113708496093750e+02 -7.275000000000000000e+01 5.325000000000000000e+01
2.000000000000000000e+01 8.368538461538464617e+02 3.961760559082031250e+02 -5.165435791015625000e+00 5.005576610565185547e-01 5.882353186607360840e-01 1.406616943359375000e+03 8.568756580352783203e-01 3.000000000000000000e+00 5.591976318359375000e+02 -7.225000000000000000e+01 5.325000000000000000e+01
1.400000000000000000e+01 8.610076923076916273e+02 3.997536926269531250e+02 -5.122680664062500000e+00 4.640001356601715088e-01 2.941176593303680420e-01 1.390950439453125000e+03 1.167499184608459473e+00 2.000000000000000000e+00 5.223389892578125000e+02 -7.175000000000000000e+01 5.325000000000000000e+01
1.000000000000000000e+01 8.881076923076926732e+02 4.002487487792968750e+02 -5.079895019531250000e+00 5.087499022483825684e-01 5.882353186607360840e-01 1.375284057617187500e+03 1.234942555427551270e+00 2.000000000000000000e+00 5.364581909179687500e+02 -7.125000000000000000e+01 5.325000000000000000e+01
2.900000000000000000e+01 8.877384615384619337e+02 4.045847778320312500e+02 -5.071899414062500000e+00 4.439852535724639893e-01 6.470588445663452148e-01 1.363616943359375000e+03 1.293349504470825195e+00 3.000000000000000000e+00 5.481809082031250000e+02 -7.075000000000000000e+01 5.325000000000000000e+01
3.800000000000000000e+01 9.721000000000001364e+02 4.896927490234375000e+02 -3.896697998046875000e+00 2.190895080566406250e-01 5.294117927551269531e-01 1.398368286132812500e+03 1.668683290481567383e+00 3.000000000000000000e+00 4.190651245117187500e+02 -6.125000000000000000e+01 5.325000000000000000e+01
3.900000000000000000e+01 5.916692307692309214e+02 2.442601318359375000e+02 -2.807067871093750000e+00 9.999999776482582092e-03 2.352941185235977173e-01 2.151692138671875000e+03 1.942833065986633301e+00 3.000000000000000000e+00 2.593195190429687500e+02 -9.625000000000000000e+01 5.375000000000000000e+01
4.000000000000000000e+01 6.075846153846151765e+02 2.707598266601562500e+02 -3.034515380859375000e+00 9.999999776482582092e-03 7.647058963775634766e-01 2.121268798828125000e+03 1.588168978691101074e+00 3.000000000000000000e+00 2.621351318359375000e+02 -9.575000000000000000e+01 5.375000000000000000e+01
4.500000000000000000e+01 6.209384615384614108e+02 2.942345581054687500e+02 -3.178924560546875000e+00 1.096363291144371033e-01 8.235294222831726074e-01 2.092010009765625000e+03 1.433221101760864258e+00 4.000000000000000000e+00 2.690286254882812500e+02 -9.525000000000000000e+01 5.375000000000000000e+01
3.200000000000000000e+01 6.502923076923078725e+02 3.114085083007812500e+02 -3.529205322265625000e+00 1.361309885978698730e-01 8.823529481887817383e-01 2.005398071289062500e+03 1.964309573173522949e+00 3.000000000000000000e+00 2.362146606445312500e+02 -9.375000000000000000e+01 5.375000000000000000e+01
3.000000000000000000e+01 6.635692307692310123e+02 3.081683959960937500e+02 -3.566925048828125000e+00 1.498841643333435059e-01 1.058823585510253906e+00 1.986517578125000000e+03 1.951196908950805664e+00 3.000000000000000000e+00 2.604637451171875000e+02 -9.325000000000000000e+01 5.375000000000000000e+01
4.000000000000000000e+01 6.727000000000005002e+02 2.943747863769531250e+02 -3.604675292968750000e+00 1.644881367683410645e-01 5.294117927551269531e-01 1.967636962890625000e+03 1.485730528831481934e+00 3.000000000000000000e+00 2.696977539062500000e+02 -9.275000000000000000e+01 5.375000000000000000e+01
4.800000000000000000e+01 6.800076923076923094e+02 2.725176391601562500e+02 -3.642395019531250000e+00 1.684614568948745728e-01 2.352941185235977173e-01 1.948756469726562500e+03 7.941834926605224609e-01 4.000000000000000000e+00 2.481059875488281250e+02 -9.225000000000000000e+01 5.375000000000000000e+01
4.200000000000000000e+01 6.903230769230766555e+02 2.333312988281250000e+02 -3.741516113281250000e+00 2.104342579841613770e-01 5.294117927551269531e-01 1.909111694335937500e+03 1.889971017837524414e+00 3.000000000000000000e+00 2.624577636718750000e+02 -9.125000000000000000e+01 5.375000000000000000e+01
4.800000000000000000e+01 6.881307692307690331e+02 2.302144622802734375e+02 -3.798156738281250000e+00 2.142007946968078613e-01 2.941176593303680420e-01 1.888724243164062500e+03 1.873269438743591309e+00 4.000000000000000000e+00 2.308982391357421875e+02 -9.075000000000000000e+01 5.375000000000000000e+01
4.200000000000000000e+01 6.673846153846153584e+02 2.019547271728515625e+02 -4.163848876953125000e+00 2.458620965480804443e-01 1.764705926179885864e-01 1.791715698242187500e+03 1.877685070037841797e+00 3.000000000000000000e+00 2.018535614013671875e+02 -8.875000000000000000e+01 5.375000000000000000e+01
1.900000000000000000e+01 5.945769230769232081e+02 2.487057952880859375e+02 -4.420379638671875000e+00 2.945746779441833496e-01 8.823529481887817383e-01 1.657655639648437500e+03 1.779984712600708008e+00 2.000000000000000000e+00 9.806320190429687500e+01 -8.475000000000000000e+01 5.375000000000000000e+01
1.600000000000000000e+01 5.609769230769230717e+02 2.648627624511718750e+02 -4.019683837890625000e+00 2.934691011905670166e-01 2.941176593303680420e-01 1.664939453125000000e+03 1.746943473815917969e+00 2.000000000000000000e+00 7.235140991210937500e+01 -8.325000000000000000e+01 5.375000000000000000e+01
1.700000000000000000e+01 6.634384615384612971e+02 3.864309387207031250e+02 -3.718536376953125000e+00 2.850493788719177246e-01 2.941176593303680420e-01 1.640227050781250000e+03 1.383021473884582520e+00 2.000000000000000000e+00 6.589205932617187500e+01 -7.825000000000000000e+01 5.375000000000000000e+01
2.800000000000000000e+01 8.552076923076929234e+02 4.007478637695312500e+02 -5.315704345703125000e+00 5.088587999343872070e-01 2.941176593303680420e-01 1.321137451171875000e+03 1.270566821098327637e+00 3.000000000000000000e+00 5.450089721679687500e+02 -7.075000000000000000e+01 5.375000000000000000e+01
1.300000000000000000e+01 8.607076923076926960e+02 4.460477600097656250e+02 -5.329864501953125000e+00 4.548865258693695068e-01 6.470588445663452148e-01 1.295079956054687500e+03 1.306883811950683594e+00 2.000000000000000000e+00 5.663750000000000000e+02 -6.975000000000000000e+01 5.375000000000000000e+01
2.300000000000000000e+01 9.020999999999999091e+02 3.960764770507812500e+02 -5.888885498046875000e+00 4.331018328666687012e-01 5.294117927551269531e-01 1.252712402343750000e+03 1.301960945129394531e+00 3.000000000000000000e+00 5.188482055664062500e+02 -6.425000000000000000e+01 5.375000000000000000e+01
3.500000000000000000e+01 9.473230769230768828e+02 4.893586120605468750e+02 -4.098724365234375000e+00 2.293546348810195923e-01 3.529411852359771729e-01 1.346900024414062500e+03 1.623230576515197754e+00 3.000000000000000000e+00 3.412601013183593750e+02 -6.125000000000000000e+01 5.375000000000000000e+01
6.700000000000000000e+01 9.537692307692304894e+02 5.010015563964843750e+02 -3.642822265625000000e+00 9.999999776482582092e-03 1.176470592617988586e-01 1.361553344726562500e+03 1.668016076087951660e+00 4.000000000000000000e+00 7.714456939697265625e+01 -6.075000000000000000e+01 5.375000000000000000e+01
5.700000000000000000e+01 6.226769230769227761e+02 3.120452270507812500e+02 -3.928070068359375000e+00 1.611425578594207764e-01 2.352941185235977173e-01 1.964178222656250000e+03 1.955191969871520996e+00 4.000000000000000000e+00 2.332243194580078125e+02 -9.425000000000000000e+01 5.425000000000000000e+01
4.200000000000000000e+01 6.341076923076924459e+02 3.129905395507812500e+02 -4.026885986328125000e+00 1.847496181726455688e-01 2.352941185235977173e-01 1.936530517578125000e+03 1.935883164405822754e+00 3.000000000000000000e+00 2.205719451904296875e+02 -9.375000000000000000e+01 5.425000000000000000e+01
3.900000000000000000e+01 6.511538461538463025e+02 2.922955932617187500e+02 -4.047576904296875000e+00 2.137682884931564331e-01 2.352941185235977173e-01 1.906064941406250000e+03 1.899713516235351562e+00 3.000000000000000000e+00 2.230618286132812500e+02 -9.275000000000000000e+01 5.425000000000000000e+01
4.100000000000000000e+01 6.509153846153844825e+02 2.674617004394531250e+02 -4.057891845703125000e+00 2.446538060903549194e-01 8.235294222831726074e-01 1.890832153320312500e+03 1.893517613410949707e+00 3.000000000000000000e+00 2.538791046142578125e+02 -9.225000000000000000e+01 5.425000000000000000e+01
4.500000000000000000e+01 6.527153846153845507e+02 2.422962493896484375e+02 -4.074859619140625000e+00 2.353033274412155151e-01 2.941176593303680420e-01 1.874479003906250000e+03 1.889263987541198730e+00 4.000000000000000000e+00 2.282294158935546875e+02 -9.175000000000000000e+01 5.425000000000000000e+01
3.700000000000000000e+01 6.401461538461537657e+02 1.835508728027343750e+02 -4.256683349609375000e+00 2.657667696475982666e-01 2.941176593303680420e-01 1.790975708007812500e+03 1.839083194732666016e+00 3.000000000000000000e+00 1.707697601318359375e+02 -8.975000000000000000e+01 5.425000000000000000e+01
1.700000000000000000e+01 6.377384615384615927e+02 1.923862304687500000e+02 -4.574707031250000000e+00 2.905720472335815430e-01 2.941176593303680420e-01 1.703953613281250000e+03 1.817567944526672363e+00 2.000000000000000000e+00 1.357100982666015625e+02 -8.825000000000000000e+01 5.425000000000000000e+01
1.400000000000000000e+01 5.503846153846152447e+02 2.439767608642578125e+02 -4.552246093750000000e+00 3.345608413219451904e-01 4.705882370471954346e-01 1.563639160156250000e+03 1.727923035621643066e+00 2.000000000000000000e+00 8.017884826660156250e+01 -8.375000000000000000e+01 5.425000000000000000e+01
2.200000000000000000e+01 5.370153846153843915e+02 2.768332519531250000e+02 -4.271667480468750000e+00 3.198998868465423584e-01 5.294117927551269531e-01 1.568167846679687500e+03 1.705320239067077637e+00 3.000000000000000000e+00 1.899999618530273438e+01 -8.275000000000000000e+01 5.425000000000000000e+01
6.000000000000000000e+00 6.654461538461539476e+02 3.836597595214843750e+02 -4.109893798828125000e+00 3.891343176364898682e-01 2.352941185235977173e-01 1.547465087890625000e+03 1.329379200935363770e+00 1.000000000000000000e+00 1.415182800292968750e+02 -7.825000000000000000e+01 5.425000000000000000e+01
1.100000000000000000e+01 7.317153846153848917e+02 3.754393310546875000e+02 -5.318725585937500000e+00 4.427691102027893066e-01 5.294117927551269531e-01 1.416447021484375000e+03 1.345215320587158203e+00 2.000000000000000000e+00 2.643240356445312500e+02 -7.525000000000000000e+01 5.425000000000000000e+01
2.100000000000000000e+01 7.865307692307690104e+02 3.956097412109375000e+02 -5.537384033203125000e+00 4.816577732563018799e-01 2.941176593303680420e-01 1.293048339843750000e+03 1.273140311241149902e+00 3.000000000000000000e+00 5.302327880859375000e+02 -7.125000000000000000e+01 5.425000000000000000e+01
2.100000000000000000e+01 9.144461538461534929e+02 4.544649658203125000e+02 -4.785705566406250000e+00 3.435651063919067383e-01 5.294117927551269531e-01 1.281633422851562500e+03 1.261479139328002930e+00 3.000000000000000000e+00 4.442466430664062500e+02 -6.175000000000000000e+01 5.425000000000000000e+01
1.600000000000000000e+01 9.099384615384612971e+02 4.785343322753906250e+02 -4.300750732421875000e+00 2.808122634887695312e-01 5.882352963089942932e-02 1.295431884765625000e+03 1.281738877296447754e+00 2.000000000000000000e+00 3.925525817871093750e+02 -6.125000000000000000e+01 5.425000000000000000e+01
3.000000000000000000e+01 9.413384615384616154e+02 4.971805419921875000e+02 -3.330780029296875000e+00 2.448061704635620117e-01 7.058823704719543457e-01 1.323028686523437500e+03 1.079971551895141602e+00 3.000000000000000000e+00 3.746789855957031250e+02 -6.025000000000000000e+01 5.425000000000000000e+01
1.100000000000000000e+01 9.564769230769228443e+02 5.065438232421875000e+02 -2.850921630859375000e+00 1.789642274379730225e-01 5.882352963089942932e-02 1.337807006835937500e+03 1.260449886322021484e+00 2.000000000000000000e+00 3.191972351074218750e+02 -5.975000000000000000e+01 5.425000000000000000e+01
2.900000000000000000e+01 9.791923076923075087e+02 5.234578247070312500e+02 -2.376190185546875000e+00 1.386990100145339966e-01 5.882352963089942932e-02 1.353565063476562500e+03 7.157692909240722656e-01 3.000000000000000000e+00 2.673082885742187500e+02 -5.925000000000000000e+01 5.425000000000000000e+01
3.500000000000000000e+01 5.762076923076923549e+02 2.873374938964843750e+02 -4.024780273437500000e+00 1.847945004701614380e-01 5.882352963089942932e-02 1.979108032226562500e+03 1.910489439964294434e+00 3.000000000000000000e+00 2.155627136230468750e+02 -9.625000000000000000e+01 5.475000000000000000e+01
5.300000000000000000e+01 5.994384615384616382e+02 3.026530761718750000e+02 -4.305847167968750000e+00 2.146117687225341797e-01 2.352941185235977173e-01 1.934240112304687500e+03 1.899930596351623535e+00 4.000000000000000000e+00 2.099505310058593750e+02 -9.525000000000000000e+01 5.475000000000000000e+01
3.800000000000000000e+01 6.275769230769232081e+02 2.904574584960937500e+02 -4.420227050781250000e+00 2.718761265277862549e-01 2.941176593303680420e-01 1.835693969726562500e+03 1.852625131607055664e+00 3.000000000000000000e+00 1.919013824462890625e+02 -9.275000000000000000e+01 5.475000000000000000e+01
3.000000000000000000e+01 6.282000000000000455e+02 2.650011596679687500e+02 -4.395202636718750000e+00 2.803284525871276855e-01 5.294117927551269531e-01 1.821203002929687500e+03 1.841087102890014648e+00 3.000000000000000000e+00 1.844600830078125000e+02 -9.225000000000000000e+01 5.475000000000000000e+01
2.700000000000000000e+01 6.297461538461536747e+02 2.356954345703125000e+02 -4.379974365234375000e+00 2.838465273380279541e-01 8.235294222831726074e-01 1.805160888671875000e+03 1.832625150680541992e+00 3.000000000000000000e+00 1.724613952636718750e+02 -9.175000000000000000e+01 5.475000000000000000e+01
4.800000000000000000e+01 6.240692307692305576e+02 2.014320068359375000e+02 -4.408325195312500000e+00 3.011333942413330078e-01 5.882352963089942932e-02 1.763769042968750000e+03 1.813128471374511719e+00 4.000000000000000000e+00 1.458970794677734375e+02 -9.075000000000000000e+01 5.475000000000000000e+01
2.800000000000000000e+01 6.189230769230769056e+02 1.920137176513671875e+02 -4.422485351562500000e+00 3.076564967632293701e-01 2.941176593303680420e-01 1.743073120117187500e+03 1.801219940185546875e+00 3.000000000000000000e+00 1.340041503906250000e+02 -9.025000000000000000e+01 5.475000000000000000e+01
1.300000000000000000e+01 6.131153846153846416e+02 1.836169128417968750e+02 -4.547210693359375000e+00 3.436642289161682129e-01 2.352941185235977173e-01 1.686410400390625000e+03 1.780080080032348633e+00 2.000000000000000000e+00 1.339027709960937500e+02 -8.925000000000000000e+01 5.475000000000000000e+01
1.100000000000000000e+01 6.048692307692306258e+02 1.930448913574218750e+02 -4.704071044921875000e+00 3.695424795150756836e-01 2.352941185235977173e-01 1.624657470703125000e+03 1.763800740242004395e+00 2.000000000000000000e+00 1.291354980468750000e+02 -8.825000000000000000e+01 5.475000000000000000e+01
3.000000000000000000e+01 6.002999999999999545e+02 2.069662628173828125e+02 -4.852905273437500000e+00 3.637406826019287109e-01 5.294117927551269531e-01 1.572074951171875000e+03 1.696590065956115723e+00 3.000000000000000000e+00 1.081794509887695312e+02 -8.775000000000000000e+01 5.475000000000000000e+01
1.500000000000000000e+01 5.814153846153847098e+02 2.318587646484375000e+02 -5.369812011718750000e+00 4.051214158535003662e-01 5.294117927551269531e-01 1.392621459960937500e+03 1.589738607406616211e+00 2.000000000000000000e+00 9.332744598388671875e+01 -8.625000000000000000e+01 5.475000000000000000e+01
1.600000000000000000e+01 5.404538461538465981e+02 2.529679565429687500e+02 -5.095581054687500000e+00 4.074897766113281250e-01 2.941176593303680420e-01 1.366218994140625000e+03 1.378211975097656250e+00 2.000000000000000000e+00 5.017396926879882812e+01 -8.375000000000000000e+01 5.475000000000000000e+01
2.800000000000000000e+01 7.623692307692308532e+02 3.819386901855468750e+02 -5.863006591796875000e+00 5.899696946144104004e-01 5.882353186607360840e-01 1.289793579101562500e+03 1.221166014671325684e+00 3.000000000000000000e+00 4.376013793945312500e+02 -7.225000000000000000e+01 5.475000000000000000e+01
1.900000000000000000e+01 8.381923076923083045e+02 4.132656860351562500e+02 -6.287750244140625000e+00 5.763943195343017578e-01 2.352941185235977173e-01 1.150982543945312500e+03 9.723548889160156250e-01 2.000000000000000000e+00 5.497208862304687500e+02 -6.425000000000000000e+01 5.475000000000000000e+01
7.000000000000000000e+00 8.838153846153844597e+02 4.307326049804687500e+02 -4.632354736328125000e+00 5.828586220741271973e-01 5.882352963089942932e-02 1.239623535156250000e+03 1.208190202713012695e+00 1.000000000000000000e+00 5.448877563476562500e+02 -6.175000000000000000e+01 5.475000000000000000e+01
2.000000000000000000e+01 9.278692307692302847e+02 4.951946105957031250e+02 -2.322662353515625000e+00 1.093120574951171875e-01 5.882352963089942932e-02 1.225590454101562500e+03 6.579532623291015625e-01 3.000000000000000000e+00 1.191736984252929688e+02 -5.925000000000000000e+01 5.475000000000000000e+01
3.900000000000000000e+01 5.783230769230768828e+02 2.918660278320312500e+02 -4.883087158203125000e+00 2.783021628856658936e-01 4.705882370471954346e-01 1.848062744140625000e+03 1.871122956275939941e+00 3.000000000000000000e+00 2.013363647460937500e+02 -9.525000000000000000e+01 5.525000000000000000e+01
3.500000000000000000e+01 5.891692307692309214e+02 2.932182006835937500e+02 -4.891906738281250000e+00 2.910185754299163818e-01 4.705882370471954346e-01 1.829574951171875000e+03 1.862908005714416504e+00 3.000000000000000000e+00 1.930976104736328125e+02 -9.475000000000000000e+01 5.525000000000000000e+01
3.700000000000000000e+01 5.963769230769229353e+02 2.951044311523437500e+02 -4.900726318359375000e+00 2.925049066543579102e-01 4.705882370471954346e-01 1.811087158203125000e+03 1.853841662406921387e+00 3.000000000000000000e+00 1.775415954589843750e+02 -9.425000000000000000e+01 5.525000000000000000e+01
2.500000000000000000e+01 6.046000000000001364e+02 2.945055236816406250e+02 -4.848602294921875000e+00 3.084233105182647705e-01 5.294117927551269531e-01 1.778634155273437500e+03 1.824800610542297363e+00 3.000000000000000000e+00 1.511336212158203125e+02 -9.325000000000000000e+01 5.525000000000000000e+01
2.500000000000000000e+01 5.991999999999999318e+02 2.865671997070312500e+02 -4.787658691406250000e+00 3.182201087474822998e-01 6.470588445663452148e-01 1.764668945312500000e+03 1.812793254852294922e+00 3.000000000000000000e+00 1.457088470458984375e+02 -9.275000000000000000e+01 5.525000000000000000e+01
2.700000000000000000e+01 6.009538461538462570e+02 2.697557678222656250e+02 -4.726684570312500000e+00 3.283535838127136230e-01 7.647058963775634766e-01 1.750703735351562500e+03 1.806486964225769043e+00 3.000000000000000000e+00 1.307094726562500000e+02 -9.225000000000000000e+01 5.525000000000000000e+01
2.700000000000000000e+01 5.939307692307693287e+02 2.383756103515625000e+02 -4.678802490234375000e+00 3.104485273361206055e-01 7.647058963775634766e-01 1.734779663085937500e+03 1.809496521949768066e+00 3.000000000000000000e+00 1.135546493530273438e+02 -9.175000000000000000e+01 5.525000000000000000e+01
2.800000000000000000e+01 5.924153846153845961e+02 2.145203094482421875e+02 -4.670135498046875000e+00 3.193685114383697510e-01 2.941176593303680420e-01 1.712979003906250000e+03 1.799238443374633789e+00 3.000000000000000000e+00 1.085257186889648438e+02 -9.125000000000000000e+01 5.525000000000000000e+01
1.000000000000000000e+01 5.931923076923075087e+02 1.902228546142578125e+02 -4.652770996093750000e+00 3.697139024734497070e-01 2.941176593303680420e-01 1.669377685546875000e+03 1.752760052680969238e+00 2.000000000000000000e+00 1.158271713256835938e+02 -9.025000000000000000e+01 5.525000000000000000e+01
2.300000000000000000e+01 5.924769230769232990e+02 1.870961761474609375e+02 -4.722320556640625000e+00 4.141679108142852783e-01 2.352941185235977173e-01 1.609422119140625000e+03 1.664860725402832031e+00 3.000000000000000000e+00 1.199540328979492188e+02 -8.925000000000000000e+01 5.525000000000000000e+01
3.400000000000000000e+01 5.788999999999999773e+02 2.000064392089843750e+02 -4.820861816406250000e+00 4.290911853313446045e-01 5.294117927551269531e-01 1.544015258789062500e+03 1.404875755310058594e+00 3.000000000000000000e+00 8.095977020263671875e+01 -8.825000000000000000e+01 5.525000000000000000e+01
1.400000000000000000e+01 7.425538461538459387e+02 3.733916015625000000e+02 -6.118072509765625000e+00 5.971797704696655273e-01 2.352941185235977173e-01 1.258540771484375000e+03 9.396340847015380859e-01 2.000000000000000000e+00 4.019642333984375000e+02 -7.225000000000000000e+01 5.525000000000000000e+01
2.500000000000000000e+01 7.872153846153843233e+02 4.131106262207031250e+02 -6.162628173828125000e+00 6.393196582794189453e-01 2.352941185235977173e-01 1.207819458007812500e+03 1.181444048881530762e+00 3.000000000000000000e+00 4.519222106933593750e+02 -7.025000000000000000e+01 5.525000000000000000e+01
1.200000000000000000e+01 8.666153846153847553e+02 4.224056091308593750e+02 -4.450439453125000000e+00 4.104521870613098145e-01 2.352941185235977173e-01 1.198253051757812500e+03 1.140727043151855469e+00 2.000000000000000000e+00 3.780148620605468750e+02 -6.175000000000000000e+01 5.525000000000000000e+01
1.500000000000000000e+01 8.641923076923073950e+02 4.253778686523437500e+02 -4.064880371093750000e+00 2.336391061544418335e-01 5.882352963089942932e-02 1.152306640625000000e+03 1.175015330314636230e+00 2.000000000000000000e+00 1.425700378417968750e+02 -6.125000000000000000e+01 5.525000000000000000e+01
2.800000000000000000e+01 5.014076923076922299e+02 2.745179443359375000e+02 -4.093322753906250000e+00 1.885353624820709229e-01 5.882352963089942932e-02 1.920137329101562500e+03 1.686381578445434570e+00 3.000000000000000000e+00 3.135720214843750000e+02 -9.975000000000000000e+01 5.575000000000000000e+01
6.000000000000000000e+01 5.597230769230768601e+02 2.837608032226562500e+02 -4.855651855468750000e+00 2.679323852062225342e-01 5.882353186607360840e-01 1.845931640625000000e+03 1.837179303169250488e+00 4.000000000000000000e+00 2.084330596923828125e+02 -9.775000000000000000e+01 5.575000000000000000e+01
3.000000000000000000e+01 5.799384615384616382e+02 2.834789733886718750e+02 -5.423187255859375000e+00 3.554207682609558105e-01 9.411764740943908691e-01 1.748097900390625000e+03 1.807732343673706055e+00 3.000000000000000000e+00 1.646082611083984375e+02 -9.475000000000000000e+01 5.575000000000000000e+01
3.800000000000000000e+01 5.842615384615385210e+02 2.851843261718750000e+02 -5.386016845703125000e+00 3.552935123443603516e-01 3.529411852359771729e-01 1.734310302734375000e+03 1.796091198921203613e+00 3.000000000000000000e+00 1.399097290039062500e+02 -9.425000000000000000e+01 5.575000000000000000e+01
2.300000000000000000e+01 5.833769230769230489e+02 2.794595642089843750e+02 -5.155090332031250000e+00 4.073222279548645020e-01 8.235294222831726074e-01 1.693643920898437500e+03 1.761623263359069824e+00 3.000000000000000000e+00 1.535318603515625000e+02 -9.275000000000000000e+01 5.575000000000000000e+01
2.700000000000000000e+01 5.795307692307692378e+02 2.698967895507812500e+02 -5.058197021484375000e+00 3.904356956481933594e-01 2.941176593303680420e-01 1.680204467773437500e+03 1.757757663726806641e+00 3.000000000000000000e+00 1.016461410522460938e+02 -9.225000000000000000e+01 5.575000000000000000e+01
1.500000000000000000e+01 5.702846153846154493e+02 2.527243804931640625e+02 -4.977630615234375000e+00 3.953254222869873047e-01 4.705882370471954346e-01 1.664398559570312500e+03 1.758490920066833496e+00 2.000000000000000000e+00 1.252483673095703125e+02 -9.175000000000000000e+01 5.575000000000000000e+01
1.600000000000000000e+01 5.792000000000000455e+02 1.932440490722656250e+02 -4.883026123046875000e+00 4.659858942031860352e-01 5.294117927551269531e-01 1.595682128906250000e+03 1.562511324882507324e+00 2.000000000000000000e+00 1.427830505371093750e+02 -9.025000000000000000e+01 5.575000000000000000e+01
1.800000000000000000e+01 5.742923076923078725e+02 1.867407073974609375e+02 -4.877319335937500000e+00 4.960607886314392090e-01 5.294117927551269531e-01 1.566964233398437500e+03 1.416402697563171387e+00 2.000000000000000000e+00 1.532933654785156250e+02 -8.975000000000000000e+01 5.575000000000000000e+01
2.000000000000000000e+01 5.715923076923077133e+02 1.899208831787109375e+02 -4.897430419921875000e+00 5.101683139801025391e-01 5.882352963089942932e-02 1.532433837890625000e+03 1.377500534057617188e+00 3.000000000000000000e+00 1.354503631591796875e+02 -8.925000000000000000e+01 5.575000000000000000e+01
2.500000000000000000e+01 5.676230769230770647e+02 2.120560913085937500e+02 -5.221801757812500000e+00 5.196976661682128906e-01 2.352941185235977173e-01 1.355166992187500000e+03 1.348268628120422363e+00 3.000000000000000000e+00 3.630416488647460938e+01 -8.775000000000000000e+01 5.575000000000000000e+01
2.200000000000000000e+01 5.581307692307692605e+02 2.181264038085937500e+02 -5.593963623046875000e+00 5.323492288589477539e-01 2.352941185235977173e-01 1.222402343750000000e+03 1.334195613861083984e+00 3.000000000000000000e+00 3.104202079772949219e+01 -8.725000000000000000e+01 5.575000000000000000e+01
3.000000000000000000e+01 7.761384615384615699e+02 4.289287414550781250e+02 -6.664428710937500000e+00 5.275106430053710938e-01 5.882353186607360840e-01 1.126469848632812500e+03 9.111219644546508789e-01 3.000000000000000000e+00 3.013778991699218750e+02 -6.825000000000000000e+01 5.575000000000000000e+01
2.500000000000000000e+01 7.650153846153851873e+02 4.417071838378906250e+02 -6.722198486328125000e+00 6.485813260078430176e-01 2.352941185235977173e-01 1.079434326171875000e+03 5.790897011756896973e-01 3.000000000000000000e+00 5.068322143554687500e+02 -6.575000000000000000e+01 5.575000000000000000e+01
5.000000000000000000e+00 8.055384615384621156e+02 4.365148315429687500e+02 -5.206970214843750000e+00 6.022722125053405762e-01 5.882352963089942932e-02 1.115955078125000000e+03 8.233730792999267578e-01 1.000000000000000000e+00 4.846524658203125000e+02 -6.275000000000000000e+01 5.575000000000000000e+01
9.000000000000000000e+00 8.507692307692309441e+02 4.389691772460937500e+02 -4.718261718750000000e+00 5.830552577972412109e-01 2.352941185235977173e-01 1.150322143554687500e+03 7.902476191520690918e-01 1.000000000000000000e+00 4.493597717285156250e+02 -6.225000000000000000e+01 5.575000000000000000e+01
1.600000000000000000e+01 8.672846153846153356e+02 4.398632507324218750e+02 -4.268493652343750000e+00 5.486003756523132324e-01 2.352941185235977173e-01 1.156882690429687500e+03 9.473795890808105469e-01 2.000000000000000000e+00 3.589900817871093750e+02 -6.175000000000000000e+01 5.575000000000000000e+01
4.700000000000000000e+01 5.160307692307692378e+02 2.818029479980468750e+02 -5.122100830078125000e+00 3.427588343620300293e-01 7.647058963775634766e-01 1.788299560546875000e+03 1.809649705886840820e+00 4.000000000000000000e+00 2.839397888183593750e+02 -9.875000000000000000e+01 5.625000000000000000e+01
2.700000000000000000e+01 5.520153846153846189e+02 2.868329772949218750e+02 -5.528472900390625000e+00 3.702887892723083496e-01 5.882352963089942932e-02 1.748327758789062500e+03 1.772482037544250488e+00 3.000000000000000000e+00 2.467487487792968750e+02 -9.775000000000000000e+01 5.625000000000000000e+01
3.900000000000000000e+01 5.589692307692307622e+02 2.859424133300781250e+02 -5.801818847656250000e+00 4.219394326210021973e-01 5.882353186607360840e-01 1.716587768554687500e+03 1.746454954147338867e+00 3.000000000000000000e+00 2.162818908691406250e+02 -9.675000000000000000e+01 5.625000000000000000e+01
6.800000000000000000e+01 5.636769230769230035e+02 2.828050842285156250e+02 -5.916320800781250000e+00 4.115054905414581299e-01 2.941176593303680420e-01 1.702089721679687500e+03 1.738810896873474121e+00 4.000000000000000000e+00 1.822834930419921875e+02 -9.625000000000000000e+01 5.625000000000000000e+01
5.300000000000000000e+01 5.663230769230769965e+02 2.810806274414062500e+02 -6.030822753906250000e+00 4.453948438167572021e-01 2.352941185235977173e-01 1.687591674804687500e+03 1.735881447792053223e+00 4.000000000000000000e+00 1.843469696044921875e+02 -9.575000000000000000e+01 5.625000000000000000e+01
2.100000000000000000e+01 5.771384615384614563e+02 2.822634582519531250e+02 -5.842712402343750000e+00 4.616631865501403809e-01 3.529411852359771729e-01 1.657321289062500000e+03 1.730347871780395508e+00 3.000000000000000000e+00 1.343840484619140625e+02 -9.425000000000000000e+01 5.625000000000000000e+01
1.700000000000000000e+01 5.596769230769230035e+02 2.834947814941406250e+02 -5.643676757812500000e+00 4.377565979957580566e-01 3.529411852359771729e-01 1.630913330078125000e+03 1.737283349037170410e+00 2.000000000000000000e+00 8.417530059814453125e+01 -9.325000000000000000e+01 5.625000000000000000e+01
4.000000000000000000e+01 5.641076923076923322e+02 2.813586730957031250e+02 -5.523498535156250000e+00 4.364384710788726807e-01 5.882353186607360840e-01 1.614194702148437500e+03 1.728668570518493652e+00 3.000000000000000000e+00 7.454388427734375000e+01 -9.275000000000000000e+01 5.625000000000000000e+01
2.600000000000000000e+01 5.654769230769231854e+02 2.574324340820312500e+02 -5.250091552734375000e+00 5.517507195472717285e-01 2.352941185235977173e-01 1.555587158203125000e+03 1.406133651733398438e+00 3.000000000000000000e+00 1.658209228515625000e+02 -9.125000000000000000e+01 5.625000000000000000e+01
2.100000000000000000e+01 5.638999999999999773e+02 2.171811065673828125e+02 -5.149230957031250000e+00 5.658628344535827637e-01 4.705882370471954346e-01 1.508626953125000000e+03 1.461968779563903809e+00 3.000000000000000000e+00 1.542351074218750000e+02 -9.025000000000000000e+01 5.625000000000000000e+01
2.000000000000000000e+01 5.374846153846152674e+02 2.040102844238281250e+02 -5.117156982421875000e+00 5.344720482826232910e-01 5.294117927551269531e-01 1.407734619140625000e+03 1.364401936531066895e+00 3.000000000000000000e+00 6.048418426513671875e+01 -8.875000000000000000e+01 5.625000000000000000e+01
4.200000000000000000e+01 4.707615384615384073e+02 2.850988769531250000e+02 -5.299774169921875000e+00 3.437283933162689209e-01 1.000000000000000000e+00 1.730261230468750000e+03 1.822529911994934082e+00 3.000000000000000000e+00 2.713804321289062500e+02 -9.975000000000000000e+01 5.675000000000000000e+01
2.500000000000000000e+01 5.189076923076922867e+02 2.830274353027343750e+02 -5.787567138671875000e+00 4.403336346149444580e-01 2.941176593303680420e-01 1.683068725585937500e+03 1.736800074577331543e+00 3.000000000000000000e+00 2.664328002929687500e+02 -9.825000000000000000e+01 5.675000000000000000e+01
2.800000000000000000e+01 5.321923076923077360e+02 2.863427429199218750e+02 -5.956634521484375000e+00 4.968657493591308594e-01 5.882353186607360840e-01 1.665608764648437500e+03 1.607874274253845215e+00 3.000000000000000000e+00 2.867112121582031250e+02 -9.775000000000000000e+01 5.675000000000000000e+01
2.100000000000000000e+01 5.457769230769229125e+02 2.858876037597656250e+02 -6.080718994140625000e+00 5.228346586227416992e-01 5.294117927551269531e-01 1.650115722656250000e+03 1.618479967117309570e+00 3.000000000000000000e+00 2.704757385253906250e+02 -9.725000000000000000e+01 5.675000000000000000e+01
3.000000000000000000e+01 5.532692307692307168e+02 2.859066467285156250e+02 -6.159790039062500000e+00 5.446169972419738770e-01 5.882353186607360840e-01 1.636589599609375000e+03 1.683895587921142578e+00 3.000000000000000000e+00 2.520065765380859375e+02 -9.675000000000000000e+01 5.675000000000000000e+01
1.700000000000000000e+01 5.548076923076923777e+02 2.839754333496093750e+02 -6.238891601562500000e+00 5.250038504600524902e-01 5.294117927551269531e-01 1.623063476562500000e+03 1.531571984291076660e+00 2.000000000000000000e+00 2.110770721435546875e+02 -9.625000000000000000e+01 5.675000000000000000e+01
2.000000000000000000e+01 5.606923076923077360e+02 2.841199035644531250e+02 -6.270812988281250000e+00 5.529835820198059082e-01 5.882353186607360840e-01 1.598694213867187500e+03 1.666671633720397949e+00 3.000000000000000000e+00 1.937855072021484375e+02 -9.525000000000000000e+01 5.675000000000000000e+01
3.000000000000000000e+01 5.606923076923077360e+02 2.855608825683593750e+02 -6.181579589843750000e+00 5.672550201416015625e-01 2.941176593303680420e-01 1.588745605468750000e+03 1.662455201148986816e+00 3.000000000000000000e+00 2.001545257568359375e+02 -9.475000000000000000e+01 5.675000000000000000e+01
2.900000000000000000e+01 5.659307692307692150e+02 2.872439575195312500e+02 -6.092346191406250000e+00 5.674048662185668945e-01 4.705882370471954346e-01 1.578796875000000000e+03 1.660020470619201660e+00 3.000000000000000000e+00 1.326187896728515625e+02 -9.425000000000000000e+01 5.675000000000000000e+01
1.200000000000000000e+01 5.567923076923077588e+02 2.888362121582031250e+02 -6.003112792968750000e+00 5.404568314552307129e-01 5.882353186607360840e-01 1.568848266601562500e+03 1.665869951248168945e+00 2.000000000000000000e+00 8.553327178955078125e+01 -9.375000000000000000e+01 5.675000000000000000e+01
1.700000000000000000e+01 5.419153846153845961e+02 2.852033386230468750e+02 -5.847045898437500000e+00 5.304976105690002441e-01 5.882353186607360840e-01 1.426243408203125000e+03 1.359985947608947754e+00 2.000000000000000000e+00 4.152288436889648438e+01 -9.225000000000000000e+01 5.675000000000000000e+01
2.200000000000000000e+01 5.366538461538461888e+02 2.822526855468750000e+02 -5.797821044921875000e+00 5.547459721565246582e-01 5.882352963089942932e-02 1.385537597656250000e+03 1.348816156387329102e+00 3.000000000000000000e+00 6.370685195922851562e+01 -9.175000000000000000e+01 5.675000000000000000e+01
1.800000000000000000e+01 5.407384615384614790e+02 2.703360900878906250e+02 -5.716156005859375000e+00 6.000890731811523438e-01 4.705882370471954346e-01 1.345100952148437500e+03 1.324351549148559570e+00 2.000000000000000000e+00 7.743944549560546875e+01 -9.075000000000000000e+01 5.675000000000000000e+01
1.100000000000000000e+01 5.317307692307693969e+02 2.572402343750000000e+02 -5.675323486328125000e+00 5.989978313446044922e-01 5.294117927551269531e-01 1.324882568359375000e+03 1.324617981910705566e+00 2.000000000000000000e+00 5.846564102172851562e+01 -9.025000000000000000e+01 5.675000000000000000e+01
1.600000000000000000e+01 5.226384615384615699e+02 2.377664642333984375e+02 -5.665008544921875000e+00 5.853718519210815430e-01 2.352941185235977173e-01 1.298897949218750000e+03 1.332634329795837402e+00 2.000000000000000000e+00 3.471508026123046875e+01 -8.975000000000000000e+01 5.675000000000000000e+01
8.000000000000000000e+00 6.547846153846154493e+02 3.644218139648437500e+02 -6.601074218750000000e+00 7.476922869682312012e-01 5.882352963089942932e-02 1.072254516601562500e+03 1.071328878402709961e+00 1.000000000000000000e+00 2.062329711914062500e+02 -7.575000000000000000e+01 5.675000000000000000e+01
3.000000000000000000e+01 4.653846153846153584e+02 2.893861694335937500e+02 -5.979919433593750000e+00 4.806712865829467773e-01 5.294117927551269531e-01 1.627691528320312500e+03 1.742000579833984375e+00 3.000000000000000000e+00 2.830822448730468750e+02 -9.925000000000000000e+01 5.725000000000000000e+01
3.100000000000000000e+01 5.078076923076924913e+02 2.843699035644531250e+02 -6.384826660156250000e+00 5.786930918693542480e-01 5.294117927551269531e-01 1.582889770507812500e+03 1.470632076263427734e+00 3.000000000000000000e+00 2.730795898437500000e+02 -9.775000000000000000e+01 5.725000000000000000e+01
4.000000000000000000e+01 5.211846153846154266e+02 2.866398925781250000e+02 -6.474121093750000000e+00 5.865976810455322266e-01 5.294117927551269531e-01 1.569145629882812500e+03 1.586370348930358887e+00 3.000000000000000000e+00 2.600805969238281250e+02 -9.725000000000000000e+01 5.725000000000000000e+01
3.300000000000000000e+01 5.320692307692307850e+02 2.889892272949218750e+02 -6.517791748046875000e+00 6.354179382324218750e-01 7.647058963775634766e-01 1.556591430664062500e+03 1.637353420257568359e+00 3.000000000000000000e+00 2.626839904785156250e+02 -9.675000000000000000e+01 5.725000000000000000e+01
3.600000000000000000e+01 5.367769230769231399e+02 2.909717712402343750e+02 -6.561431884765625000e+00 6.184244751930236816e-01 5.294117927551269531e-01 1.544037109375000000e+03 1.627463102340698242e+00 3.000000000000000000e+00 2.088924255371093750e+02 -9.625000000000000000e+01 5.725000000000000000e+01
3.300000000000000000e+01 5.430153846153846189e+02 2.947088317871093750e+02 -6.605102539062500000e+00 6.409763693809509277e-01 5.882353186607360840e-01 1.531482910156250000e+03 1.538586735725402832e+00 3.000000000000000000e+00 2.134455261230468750e+02 -9.575000000000000000e+01 5.725000000000000000e+01
3.900000000000000000e+01 5.487000000000000455e+02 2.989354248046875000e+02 -6.441619873046875000e+00 6.719149947166442871e-01 2.941176593303680420e-01 1.510480468750000000e+03 1.339225888252258301e+00 3.000000000000000000e+00 2.078555297851562500e+02 -9.475000000000000000e+01 5.725000000000000000e+01
1.300000000000000000e+01 5.388461538461538112e+02 3.048012390136718750e+02 -6.242340087890625000e+00 6.029536724090576172e-01 5.294117927551269531e-01 1.490064575195312500e+03 1.425814270973205566e+00 2.000000000000000000e+00 8.273500061035156250e+01 -9.375000000000000000e+01 5.725000000000000000e+01
5.000000000000000000e+00 5.267307692307692832e+02 3.070729980468750000e+02 -6.258483886718750000e+00 6.016715168952941895e-01 6.470588445663452148e-01 1.411713256835937500e+03 1.323691964149475098e+00 1.000000000000000000e+00 6.366521072387695312e+01 -9.325000000000000000e+01 5.725000000000000000e+01
2.700000000000000000e+01 4.548153846153846303e+02 2.943852539062500000e+02 -6.510437011718750000e+00 6.157103180885314941e-01 5.882353186607360840e-01 1.537394531250000000e+03 1.377723455429077148e+00 3.000000000000000000e+00 3.375719909667968750e+02 -9.925000000000000000e+01 5.775000000000000000e+01
2.300000000000000000e+01 4.575923076923077701e+02 2.906404418945312500e+02 -6.611297607421875000e+00 6.130390763282775879e-01 5.882352963089942932e-02 1.524986694335937500e+03 1.363672614097595215e+00 3.000000000000000000e+00 2.918372802734375000e+02 -9.875000000000000000e+01 5.775000000000000000e+01
3.800000000000000000e+01 4.712769230769230830e+02 2.927523193359375000e+02 -6.712127685546875000e+00 6.538733243942260742e-01 5.882352963089942932e-02 1.512578735351562500e+03 1.343241572380065918e+00 3.000000000000000000e+00 2.994298706054687500e+02 -9.825000000000000000e+01 5.775000000000000000e+01
3.100000000000000000e+01 4.871615384615384414e+02 2.984258117675781250e+02 -6.812988281250000000e+00 6.804945468902587891e-01 5.294117927551269531e-01 1.500170776367187500e+03 1.321664214134216309e+00 3.000000000000000000e+00 3.114528503417968750e+02 -9.775000000000000000e+01 5.775000000000000000e+01
3.100000000000000000e+01 5.106615384615384983e+02 3.029192199707031250e+02 -6.875762939453125000e+00 7.185564637184143066e-01 2.941176593303680420e-01 1.476593261718750000e+03 1.350999593734741211e+00 3.000000000000000000e+00 2.929223632812500000e+02 -9.675000000000000000e+01 5.775000000000000000e+01
2.900000000000000000e+01 5.176230769230769511e+02 3.095821838378906250e+02 -6.884002685546875000e+00 7.102361917495727539e-01 2.941176593303680420e-01 1.465010864257812500e+03 1.380593419075012207e+00 3.000000000000000000e+00 2.233167572021484375e+02 -9.625000000000000000e+01 5.775000000000000000e+01
2.300000000000000000e+01 5.293923076923076678e+02 3.196217346191406250e+02 -6.811737060546875000e+00 7.322881817817687988e-01 5.882352963089942932e-02 1.442682495117187500e+03 1.260851860046386719e+00 3.000000000000000000e+00 1.948545532226562500e+02 -9.525000000000000000e+01 5.775000000000000000e+01
2.000000000000000000e+01 5.314999999999998863e+02 3.228826599121093750e+02 -6.701690673828125000e+00 7.209331393241882324e-01 1.176470592617988586e-01 1.432215332031250000e+03 1.253926753997802734e+00 3.000000000000000000e+00 1.552154235839843750e+02 -9.475000000000000000e+01 5.775000000000000000e+01
1.100000000000000000e+01 5.310923076923077133e+02 3.248141479492187500e+02 -6.591613769531250000e+00 6.836498379707336426e-01 1.764705926179885864e-01 1.421748168945312500e+03 1.257944822311401367e+00 2.000000000000000000e+00 8.596768188476562500e+01 -9.425000000000000000e+01 5.775000000000000000e+01
4.100000000000000000e+01 6.458307692307693060e+02 3.664996032714843750e+02 -7.455566406250000000e+00 6.961312890052795410e-01 5.294117927551269531e-01 1.012272521972656250e+03 5.789250135421752930e-01 3.000000000000000000e+00 1.656589660644531250e+02 -6.925000000000000000e+01 5.775000000000000000e+01
1.900000000000000000e+01 6.507076923076924686e+02 3.672040405273437500e+02 -7.403900146484375000e+00 7.594821453094482422e-01 3.529411852359771729e-01 9.974886474609375000e+02 1.131980538368225098e+00 2.000000000000000000e+00 2.183103637695312500e+02 -6.875000000000000000e+01 5.775000000000000000e+01
3.100000000000000000e+01 4.467769230769231967e+02 2.944262390136718750e+02 -7.094818115234375000e+00 7.143106460571289062e-01 5.882352963089942932e-02 1.442464965820312500e+03 1.320408701896667480e+00 3.000000000000000000e+00 3.157325439453125000e+02 -9.875000000000000000e+01 5.825000000000000000e+01
2.300000000000000000e+01 4.767538461538462116e+02 3.405491638183593750e+02 -7.250854492187500000e+00 7.643154859542846680e-01 3.529411852359771729e-01 1.412084594726562500e+03 1.527974247932434082e+00 3.000000000000000000e+00 2.786691894531250000e+02 -9.725000000000000000e+01 5.825000000000000000e+01
1.300000000000000000e+01 5.006923076923076792e+02 3.398434448242187500e+02 -7.101318359375000000e+00 7.469299435615539551e-01 5.882352963089942932e-02 1.365154663085937500e+03 1.233907699584960938e+00 2.000000000000000000e+00 1.213580322265625000e+02 -9.525000000000000000e+01 5.825000000000000000e+01
1.100000000000000000e+01 5.067846153846154493e+02 3.458674926757812500e+02 -6.893371582031250000e+00 7.279773354530334473e-01 5.294117927551269531e-01 1.330787597656250000e+03 1.225243091583251953e+00 2.000000000000000000e+00 4.785131072998046875e+01 -9.425000000000000000e+01 5.825000000000000000e+01
2.400000000000000000e+01 4.126230769230768374e+02 3.076873474121093750e+02 -7.418273925781250000e+00 7.360563874244689941e-01 5.882352963089942932e-02 1.389708740234375000e+03 1.595520019531250000e+00 3.000000000000000000e+00 3.417160644531250000e+02 -9.975000000000000000e+01 5.875000000000000000e+01
2.000000000000000000e+01 4.159769230769231285e+02 2.999122619628906250e+02 -7.516967773437500000e+00 7.158634066581726074e-01 1.176470592617988586e-01 1.379600341796875000e+03 1.313924312591552734e+00 3.000000000000000000e+00 2.555708160400390625e+02 -9.925000000000000000e+01 5.875000000000000000e+01
3.900000000000000000e+01 4.221153846153844711e+02 3.030251770019531250e+02 -7.549926757812500000e+00 7.663652300834655762e-01 5.294117927551269531e-01 1.371507690429687500e+03 1.289463996887207031e+00 3.000000000000000000e+00 2.800173034667968750e+02 -9.875000000000000000e+01 5.875000000000000000e+01
1.500000000000000000e+01 4.443538461538461206e+02 3.563405456542968750e+02 -7.615875244140625000e+00 7.812902927398681641e-01 3.529411852359771729e-01 1.355322387695312500e+03 1.241827249526977539e+00 2.000000000000000000e+00 2.406524963378906250e+02 -9.775000000000000000e+01 5.875000000000000000e+01
1.600000000000000000e+01 4.536846153846153697e+02 3.694195251464843750e+02 -7.611938476562500000e+00 8.297439813613891602e-01 3.529411852359771729e-01 1.346742431640625000e+03 1.224807381629943848e+00 2.000000000000000000e+00 2.784633483886718750e+02 -9.725000000000000000e+01 5.875000000000000000e+01
1.900000000000000000e+01 4.566769230769230035e+02 3.582849426269531250e+02 -7.571105957031250000e+00 8.114103674888610840e-01 5.882353186607360840e-01 1.337675170898437500e+03 1.221194982528686523e+00 2.000000000000000000e+00 2.125424499511718750e+02 -9.675000000000000000e+01 5.875000000000000000e+01
0.000000000000000000e+00 2.526923076923076223e+02 1.675296020507812500e+02 -1.465502929687500000e+01 9.999281764030456543e-01 2.352941185235977173e-01 7.469887084960937500e+02 5.964300632476806641e-01 1.000000000000000000e+00 2.973551330566406250e+02 -9.375000000000000000e+01 6.575000000000000000e+01
