# Supplementary material for: Environmental Conditions for Alternative Tree Cover States in HighLatitudes
Source: Copernicus journal article supplement (doi:10.5194/bg-2016-401), 2016-10-11
Supplement: Supplementary file 4 [file bg-2016-401-supplement.zip › Analysis/files_to_load_and_import/boreal_na_sgauss_scores.txt]

2.677360010844694216e+01 3.737726038698875897e+01 3.791267131731724760e+01 2.795083703701303790e+01
5.571571738112456273e+01 4.656341274855168422e+01 4.649122804356244387e+01 4.013726435121417069e+01
2.969123992117116728e+01 2.572902264343420242e+01 2.343431811231140571e+01 1.889171731788677278e+01
4.284200010311476348e+01 4.205882056763642396e+01 3.718164471981156538e+01 3.294713029201494692e+01
3.547966269077883794e+01 2.218891254266974755e+01 2.209738891038241704e+01 2.005830394397844785e+01
4.823718031104463932e+01 3.766136270153523213e+01 2.939424757670278865e+01 2.568071691867511674e+01
4.423485092766716775e+01 2.775313840685671352e+01 2.771993279880861394e+01 2.510630834019142554e+01
5.937438205684153303e+01 3.650659274635722085e+01 3.650492321357371850e+01 1.855684050468023472e+01
3.883774948745391953e+01 3.323783556124664784e+01 3.255471000139811366e+01 2.521795511485337116e+01
5.222333173028850695e+01 4.612587937526281934e+01 4.601571821355017988e+01 3.845854673243340471e+01
