# Supplementary material for: Environmental Conditions for Alternative Tree Cover States in HighLatitudes
Source: Copernicus journal article supplement (doi:10.5194/bg-2016-401), 2016-10-11
Supplement: Supplementary file 4 [file bg-2016-401-supplement.zip › Analysis/files_to_load_and_import/boreal_na_west_database.txt]

1.600000000000000000e+01 1.072330769230768965e+03 5.940416870117187500e+02 7.462402343750000000e+00 0.000000000000000000e+00 0.000000000000000000e+00 3.629697265625000000e+03 3.852497100830078125e+00 1.000000000000000000e+00 8.718759918212890625e+01 -1.232500000000000000e+02 4.525000000000000000e+01
5.900000000000000000e+01 1.630007692307692196e+03 6.344095458984375000e+02 5.780090332031250000e+00 0.000000000000000000e+00 0.000000000000000000e+00 3.546297119140625000e+03 2.548612356185913086e+00 4.000000000000000000e+00 3.625658569335937500e+02 -1.222500000000000000e+02 4.525000000000000000e+01
6.900000000000000000e+01 1.415107692307692105e+03 6.452888793945312500e+02 5.099151611328125000e+00 0.000000000000000000e+00 0.000000000000000000e+00 3.296928222656250000e+03 2.334721565246582031e+00 4.000000000000000000e+00 1.114204467773437500e+03 -1.217500000000000000e+02 4.525000000000000000e+01
8.000000000000000000e+00 7.647999999999999545e+02 4.475109863281250000e+02 4.898895263671875000e+00 0.000000000000000000e+00 2.941176593303680420e-01 3.270876464843750000e+03 3.080987930297851562e+00 1.000000000000000000e+00 5.736760253906250000e+02 -1.212500000000000000e+02 4.525000000000000000e+01
1.000000000000000000e+00 2.887692307692308304e+02 2.201305236816406250e+02 4.698638916015625000e+00 0.000000000000000000e+00 1.176470637321472168e+00 3.246973876953125000e+03 2.104991674423217773e+00 1.000000000000000000e+00 7.393183593750000000e+02 -1.207500000000000000e+02 4.525000000000000000e+01
1.000000000000000000e+00 2.769307692307692150e+02 2.014726867675781250e+02 4.498413085937500000e+00 0.000000000000000000e+00 5.882352963089942932e-02 3.225102294921875000e+03 2.125187397003173828e+00 1.000000000000000000e+00 9.002317504882812500e+02 -1.202500000000000000e+02 4.525000000000000000e+01
2.000000000000000000e+00 3.314461538461537202e+02 2.096279296875000000e+02 4.321197509765625000e+00 0.000000000000000000e+00 7.058823704719543457e-01 2.993604492187500000e+03 2.095083475112915039e+00 1.000000000000000000e+00 8.381884155273437500e+02 -1.197500000000000000e+02 4.525000000000000000e+01
4.000000000000000000e+00 3.886692307692306940e+02 2.766211853027343750e+02 4.166992187500000000e+00 0.000000000000000000e+00 1.176470592617988586e-01 2.973130615234375000e+03 2.905186176300048828e+00 1.000000000000000000e+00 1.234169799804687500e+03 -1.192500000000000000e+02 4.525000000000000000e+01
3.900000000000000000e+01 4.215846153846151196e+02 3.266361694335937500e+02 4.012817382812500000e+00 0.000000000000000000e+00 6.470588445663452148e-01 2.950628173828125000e+03 3.785861492156982422e+00 3.000000000000000000e+00 1.466727661132812500e+03 -1.187500000000000000e+02 4.525000000000000000e+01
2.500000000000000000e+01 4.177846153846152788e+02 3.727501831054687500e+02 3.858612060546875000e+00 0.000000000000000000e+00 2.352941185235977173e-01 2.927210449218750000e+03 3.365918636322021484e+00 3.000000000000000000e+00 1.223193481445312500e+03 -1.182500000000000000e+02 4.525000000000000000e+01
6.900000000000000000e+01 3.844076923076922299e+02 3.502135620117187500e+02 3.511199951171875000e+00 0.000000000000000000e+00 1.411764740943908691e+00 2.729595703125000000e+03 2.561030387878417969e+00 4.000000000000000000e+00 1.351202270507812500e+03 -1.177500000000000000e+02 4.525000000000000000e+01
2.100000000000000000e+01 5.797384615384612516e+02 4.371640014648437500e+02 2.687561035156250000e+00 0.000000000000000000e+00 3.529411852359771729e-01 2.664777832031250000e+03 2.532134294509887695e+00 3.000000000000000000e+00 1.321743652343750000e+03 -1.167500000000000000e+02 4.525000000000000000e+01
5.900000000000000000e+01 2.790461538461537998e+02 2.644379272460937500e+02 5.706787109375000000e-02 0.000000000000000000e+00 1.235294103622436523e+00 2.321963134765625000e+03 2.058600902557373047e+00 4.000000000000000000e+00 1.889574462890625000e+03 -1.142500000000000000e+02 4.525000000000000000e+01
2.000000000000000000e+00 2.636846153846154266e+02 2.496418304443359375e+02 -1.014129638671875000e+00 0.000000000000000000e+00 5.882352963089942932e-02 2.321606933593750000e+03 2.255477905273437500e+00 1.000000000000000000e+00 1.697906250000000000e+03 -1.127500000000000000e+02 4.525000000000000000e+01
1.000000000000000000e+01 4.900538461538459956e+02 3.588441162109375000e+02 -8.994140625000000000e-01 0.000000000000000000e+00 0.000000000000000000e+00 2.441755371093750000e+03 2.279029846191406250e+00 1.000000000000000000e+00 1.595843017578125000e+03 -1.117500000000000000e+02 4.525000000000000000e+01
2.000000000000000000e+00 3.494615384615386802e+02 1.580881347656250000e+02 2.164520263671875000e+00 0.000000000000000000e+00 2.352941185235977173e-01 2.857673095703125000e+03 3.158253669738769531e+00 1.000000000000000000e+00 1.455533325195312500e+03 -1.087500000000000000e+02 4.525000000000000000e+01
1.000000000000000000e+00 3.278923076923078384e+02 1.673427429199218750e+02 2.717163085937500000e+00 0.000000000000000000e+00 2.941176593303680420e-01 3.093960693359375000e+03 2.970858335494995117e+00 1.000000000000000000e+00 1.411353637695312500e+03 -1.082500000000000000e+02 4.525000000000000000e+01
2.000000000000000000e+00 3.179461538461539476e+02 2.604367980957031250e+02 3.269805908203125000e+00 0.000000000000000000e+00 1.058823585510253906e+00 3.126695312500000000e+03 3.729613780975341797e+00 1.000000000000000000e+00 1.127680297851562500e+03 -1.077500000000000000e+02 4.525000000000000000e+01
7.000000000000000000e+00 3.306153846153847553e+02 2.340709991455078125e+02 3.822448730468750000e+00 0.000000000000000000e+00 3.529411852359771729e-01 3.156721435546875000e+03 3.804862022399902344e+00 1.000000000000000000e+00 1.180484619140625000e+03 -1.072500000000000000e+02 4.525000000000000000e+01
3.000000000000000000e+00 3.433000000000001251e+02 1.785722351074218750e+02 4.288085937500000000e+00 0.000000000000000000e+00 5.882353186607360840e-01 3.312505371093750000e+03 3.800651788711547852e+00 1.000000000000000000e+00 1.152386230468750000e+03 -1.067500000000000000e+02 4.525000000000000000e+01
1.600000000000000000e+01 3.583076923076922640e+02 1.600307006835937500e+02 4.492614746093750000e+00 0.000000000000000000e+00 7.647058963775634766e-01 3.323978027343750000e+03 3.861819505691528320e+00 1.000000000000000000e+00 1.191721679687500000e+03 -1.062500000000000000e+02 4.525000000000000000e+01
1.000000000000000000e+00 3.774307692307692150e+02 1.592143249511718750e+02 4.697143554687500000e+00 0.000000000000000000e+00 9.411764740943908691e-01 3.332845703125000000e+03 3.187011957168579102e+00 1.000000000000000000e+00 1.080758544921875000e+03 -1.057500000000000000e+02 4.525000000000000000e+01
2.000000000000000000e+00 3.754692307692308191e+02 1.757071228027343750e+02 4.901702880859375000e+00 0.000000000000000000e+00 5.882352963089942932e-02 3.339061767578125000e+03 3.389971971511840820e+00 1.000000000000000000e+00 1.011227966308593750e+03 -1.052500000000000000e+02 4.525000000000000000e+01
1.000000000000000000e+00 3.705153846153845052e+02 1.847846984863281250e+02 5.002197265625000000e+00 0.000000000000000000e+00 0.000000000000000000e+00 3.384424072265625000e+03 3.893035411834716797e+00 1.000000000000000000e+00 1.130598266601562500e+03 -1.047500000000000000e+02 4.525000000000000000e+01
1.000000000000000000e+00 3.436384615384613994e+02 1.859476318359375000e+02 4.998626708984375000e+00 0.000000000000000000e+00 3.529411852359771729e-01 3.379717285156250000e+03 2.984688520431518555e+00 1.000000000000000000e+00 1.007493957519531250e+03 -1.042500000000000000e+02 4.525000000000000000e+01
1.000000000000000000e+00 3.358307692307691923e+02 1.819719848632812500e+02 4.995056152343750000e+00 0.000000000000000000e+00 5.294117927551269531e-01 3.374271728515625000e+03 2.137615919113159180e+00 1.000000000000000000e+00 9.537901000976562500e+02 -1.037500000000000000e+02 4.525000000000000000e+01
4.000000000000000000e+00 3.575076923076924231e+02 1.875175018310546875e+02 4.991516113281250000e+00 0.000000000000000000e+00 0.000000000000000000e+00 3.368844970703125000e+03 3.896698951721191406e+00 1.000000000000000000e+00 9.135078735351562500e+02 -1.032500000000000000e+02 4.525000000000000000e+01
2.000000000000000000e+00 3.768769230769231058e+02 1.973517608642578125e+02 4.920318603515625000e+00 0.000000000000000000e+00 0.000000000000000000e+00 3.356035644531250000e+03 3.908400535583496094e+00 1.000000000000000000e+00 8.618062744140625000e+02 -1.027500000000000000e+02 4.525000000000000000e+01
6.000000000000000000e+00 4.099461538461539476e+02 2.086399230957031250e+02 4.826568603515625000e+00 0.000000000000000000e+00 6.470588445663452148e-01 3.352270507812500000e+03 3.937194108963012695e+00 1.000000000000000000e+00 7.301537475585937500e+02 -1.022500000000000000e+02 4.525000000000000000e+01
4.000000000000000000e+00 4.361153846153846985e+02 2.113619079589843750e+02 4.732818603515625000e+00 0.000000000000000000e+00 0.000000000000000000e+00 3.349326660156250000e+03 3.952824354171752930e+00 1.000000000000000000e+00 6.726934814453125000e+02 -1.017500000000000000e+02 4.525000000000000000e+01
6.000000000000000000e+00 4.483615384615387143e+02 2.180666046142578125e+02 4.639068603515625000e+00 0.000000000000000000e+00 5.294117927551269531e-01 3.347441162109375000e+03 3.959222555160522461e+00 1.000000000000000000e+00 6.652499389648437500e+02 -1.012500000000000000e+02 4.525000000000000000e+01
9.000000000000000000e+00 4.362153846153845507e+02 2.108714904785156250e+02 4.645599365234375000e+00 0.000000000000000000e+00 0.000000000000000000e+00 3.332659667968750000e+03 3.985782861709594727e+00 1.000000000000000000e+00 5.606432495117187500e+02 -1.007500000000000000e+02 4.525000000000000000e+01
6.700000000000000000e+01 1.720230769230769056e+03 6.565642700195312500e+02 8.455932617187500000e+00 0.000000000000000000e+00 0.000000000000000000e+00 3.694218994140625000e+03 2.578819274902343750e+00 4.000000000000000000e+00 2.294776000976562500e+02 -1.237500000000000000e+02 4.575000000000000000e+01
6.500000000000000000e+01 1.574192307692308532e+03 6.260153198242187500e+02 7.688110351562500000e+00 0.000000000000000000e+00 0.000000000000000000e+00 3.638853027343750000e+03 2.579348564147949219e+00 4.000000000000000000e+00 2.998395080566406250e+02 -1.232500000000000000e+02 4.575000000000000000e+01
1.300000000000000000e+01 1.121107692307692560e+03 5.694894409179687500e+02 6.920288085937500000e+00 0.000000000000000000e+00 0.000000000000000000e+00 3.576416503906250000e+03 1.772955894470214844e+00 1.000000000000000000e+00 3.565056610107421875e+01 -1.227500000000000000e+02 4.575000000000000000e+01
6.700000000000000000e+01 2.000984615384615608e+03 6.294533081054687500e+02 6.152465820312500000e+00 0.000000000000000000e+00 0.000000000000000000e+00 3.517161376953125000e+03 2.599434137344360352e+00 4.000000000000000000e+00 6.608956298828125000e+02 -1.222500000000000000e+02 4.575000000000000000e+01
7.600000000000000000e+01 1.830961538461538566e+03 6.320665893554687500e+02 5.528442382812500000e+00 0.000000000000000000e+00 0.000000000000000000e+00 3.294937988281250000e+03 2.439605236053466797e+00 4.000000000000000000e+00 4.549206848144531250e+02 -1.217500000000000000e+02 4.575000000000000000e+01
4.800000000000000000e+01 8.912692307692307168e+02 4.483576049804687500e+02 5.335906982421875000e+00 0.000000000000000000e+00 2.941176593303680420e-01 3.264122802734375000e+03 3.120883703231811523e+00 4.000000000000000000e+00 3.501225280761718750e+02 -1.212500000000000000e+02 4.575000000000000000e+01
4.000000000000000000e+00 3.453615384615384301e+02 2.396151733398437500e+02 5.143341064453125000e+00 0.000000000000000000e+00 2.941176593303680420e-01 3.235673583984375000e+03 4.032940387725830078e+00 1.000000000000000000e+00 7.079478149414062500e+02 -1.207500000000000000e+02 4.575000000000000000e+01
4.000000000000000000e+00 2.191999999999999318e+02 1.849193878173828125e+02 4.950805664062500000e+00 0.000000000000000000e+00 8.235294222831726074e-01 3.209546142578125000e+03 3.538486003875732422e+00 1.000000000000000000e+00 2.746874694824218750e+02 -1.202500000000000000e+02 4.575000000000000000e+01
7.000000000000000000e+00 1.959461538461536918e+02 1.452718963623046875e+02 4.761291503906250000e+00 0.000000000000000000e+00 1.588235259056091309e+00 3.010949707031250000e+03 4.000669479370117188e+00 1.000000000000000000e+00 1.743455505371093750e+02 -1.197500000000000000e+02 4.575000000000000000e+01
2.000000000000000000e+00 3.515999999999997954e+02 2.416390838623046875e+02 4.388336181640625000e+00 0.000000000000000000e+00 2.411764621734619141e+00 2.953054199218750000e+03 4.185682773590087891e+00 1.000000000000000000e+00 4.907540283203125000e+02 -1.187500000000000000e+02 4.575000000000000000e+01
5.500000000000000000e+01 4.853615384615383732e+02 4.232775878906250000e+02 4.201843261718750000e+00 0.000000000000000000e+00 1.470588207244873047e+00 2.922914550781250000e+03 3.449283838272094727e+00 4.000000000000000000e+00 9.370731201171875000e+02 -1.182500000000000000e+02 4.575000000000000000e+01
4.000000000000000000e+01 4.572384615384618201e+02 4.432369079589843750e+02 3.828735351562500000e+00 0.000000000000000000e+00 2.352941185235977173e-01 2.746780273437500000e+03 2.592496395111083984e+00 3.000000000000000000e+00 1.186978515625000000e+03 -1.177500000000000000e+02 4.575000000000000000e+01
2.700000000000000000e+01 5.019153846153845393e+02 3.208512878417968750e+02 3.393432617187500000e+00 0.000000000000000000e+00 2.941176593303680420e-01 2.702407226562500000e+03 3.113029003143310547e+00 3.000000000000000000e+00 1.358203735351562500e+03 -1.172500000000000000e+02 4.575000000000000000e+01
3.000000000000000000e+00 5.587307692307690559e+02 2.596292114257812500e+02 2.958129882812500000e+00 0.000000000000000000e+00 1.411764740943908691e+00 2.656466552734375000e+03 3.846575975418090820e+00 1.000000000000000000e+00 6.481063842773437500e+02 -1.167500000000000000e+02 4.575000000000000000e+01
3.000000000000000000e+01 6.309769230769229580e+02 3.418236083984375000e+02 2.522827148437500000e+00 0.000000000000000000e+00 1.411764740943908691e+00 2.615168945312500000e+03 2.799054622650146484e+00 3.000000000000000000e+00 8.662194213867187500e+02 -1.162500000000000000e+02 4.575000000000000000e+01
7.100000000000000000e+01 6.121307692307690331e+02 4.860449523925781250e+02 1.968750000000000000e+00 0.000000000000000000e+00 5.294117927551269531e-01 2.453523681640625000e+03 2.225625276565551758e+00 4.000000000000000000e+00 1.583796630859375000e+03 -1.157500000000000000e+02 4.575000000000000000e+01
4.800000000000000000e+01 4.993769230769232763e+02 5.220376586914062500e+02 1.414642333984375000e+00 0.000000000000000000e+00 7.647058963775634766e-01 2.415488769531250000e+03 2.143804311752319336e+00 4.000000000000000000e+00 1.668857910156250000e+03 -1.152500000000000000e+02 4.575000000000000000e+01
5.000000000000000000e+01 3.900153846153846189e+02 4.862987060546875000e+02 8.605651855468750000e-01 0.000000000000000000e+00 8.235294222831726074e-01 2.380380371093750000e+03 2.094846487045288086e+00 4.000000000000000000e+00 1.450809570312500000e+03 -1.147500000000000000e+02 4.575000000000000000e+01
5.700000000000000000e+01 3.077461538461539021e+02 4.041720581054687500e+02 3.769836425781250000e-01 0.000000000000000000e+00 8.823529481887817383e-01 2.305343017578125000e+03 2.070805311203002930e+00 4.000000000000000000e+00 1.879067504882812500e+03 -1.142500000000000000e+02 4.575000000000000000e+01
2.000000000000000000e+00 3.325384615384615472e+02 2.915611267089843750e+02 -4.389648437500000000e-01 0.000000000000000000e+00 0.000000000000000000e+00 2.305875000000000000e+03 2.775451898574829102e+00 1.000000000000000000e+00 1.765903076171875000e+03 -1.127500000000000000e+02 4.575000000000000000e+01
1.000000000000000000e+00 3.358153846153845734e+02 2.747515869140625000e+02 -4.494934082031250000e-01 0.000000000000000000e+00 1.176470592617988586e-01 2.390547851562500000e+03 3.327259063720703125e+00 1.000000000000000000e+00 1.440894287109375000e+03 -1.122500000000000000e+02 4.575000000000000000e+01
5.000000000000000000e+00 4.007923076923075882e+02 2.401125793457031250e+02 -1.985778808593750000e-01 0.000000000000000000e+00 5.882352963089942932e-02 2.425444824218750000e+03 3.542737483978271484e+00 1.000000000000000000e+00 1.478331298828125000e+03 -1.117500000000000000e+02 4.575000000000000000e+01
4.000000000000000000e+00 4.265923076923075428e+02 3.066191406250000000e+02 8.500366210937500000e-01 0.000000000000000000e+00 2.352941185235977173e-01 2.715644531250000000e+03 3.295426130294799805e+00 1.000000000000000000e+00 1.373283325195312500e+03 -1.102500000000000000e+02 4.575000000000000000e+01
8.000000000000000000e+00 4.145307692307691809e+02 2.850620422363281250e+02 1.495391845703125000e+00 0.000000000000000000e+00 8.235294222831726074e-01 2.772695068359375000e+03 3.639435291290283203e+00 1.000000000000000000e+00 1.224311767578125000e+03 -1.097500000000000000e+02 4.575000000000000000e+01
1.000000000000000000e+00 3.925692307692307281e+02 1.881030731201171875e+02 2.140777587890625000e+00 0.000000000000000000e+00 0.000000000000000000e+00 2.831284667968750000e+03 3.804097414016723633e+00 1.000000000000000000e+00 1.337957031250000000e+03 -1.092500000000000000e+02 4.575000000000000000e+01
1.000000000000000000e+00 3.547923076923076451e+02 1.646867370605468750e+02 2.786132812500000000e+00 0.000000000000000000e+00 4.705882370471954346e-01 2.882978515625000000e+03 3.807306289672851562e+00 1.000000000000000000e+00 1.067005859375000000e+03 -1.087500000000000000e+02 4.575000000000000000e+01
9.000000000000000000e+00 3.448692307692308532e+02 1.754175415039062500e+02 3.255493164062500000e+00 0.000000000000000000e+00 4.705882370471954346e-01 3.094248291015625000e+03 3.852518081665039062e+00 1.000000000000000000e+00 1.097494506835937500e+03 -1.082500000000000000e+02 4.575000000000000000e+01
1.000000000000000000e+00 3.479153846153845961e+02 1.940204772949218750e+02 3.724853515625000000e+00 0.000000000000000000e+00 7.647058963775634766e-01 3.139726562500000000e+03 3.889575004577636719e+00 1.000000000000000000e+00 9.481448364257812500e+02 -1.077500000000000000e+02 4.575000000000000000e+01
1.000000000000000000e+01 3.551615384615385551e+02 1.893991699218750000e+02 4.194183349609375000e+00 0.000000000000000000e+00 4.117647111415863037e-01 3.181958984375000000e+03 3.840264797210693359e+00 1.000000000000000000e+00 1.007221496582031250e+03 -1.072500000000000000e+02 4.575000000000000000e+01
4.000000000000000000e+00 3.485923076923076565e+02 1.850218200683593750e+02 4.571929931640625000e+00 0.000000000000000000e+00 7.058823704719543457e-01 3.321152099609375000e+03 3.835369586944580078e+00 1.000000000000000000e+00 1.028546142578125000e+03 -1.067500000000000000e+02 4.575000000000000000e+01
7.000000000000000000e+00 3.444384615384615813e+02 1.671529388427734375e+02 4.674865722656250000e+00 0.000000000000000000e+00 4.117647111415863037e-01 3.334927978515625000e+03 3.918171405792236328e+00 1.000000000000000000e+00 9.061692504882812500e+02 -1.062500000000000000e+02 4.575000000000000000e+01
3.000000000000000000e+00 3.710384615384615472e+02 1.650004425048828125e+02 4.777801513671875000e+00 0.000000000000000000e+00 5.294117927551269531e-01 3.345771728515625000e+03 3.935112714767456055e+00 1.000000000000000000e+00 9.489454345703125000e+02 -1.057500000000000000e+02 4.575000000000000000e+01
6.000000000000000000e+00 3.980000000000002274e+02 1.724779815673828125e+02 4.880737304687500000e+00 0.000000000000000000e+00 0.000000000000000000e+00 3.353698242187500000e+03 3.081095695495605469e+00 1.000000000000000000e+00 9.489465332031250000e+02 -1.052500000000000000e+02 4.575000000000000000e+01
4.000000000000000000e+00 4.082153846153847212e+02 1.844602355957031250e+02 4.890838623046875000e+00 0.000000000000000000e+00 1.176470637321472168e+00 3.390621337890625000e+03 3.622791767120361328e+00 1.000000000000000000e+00 9.938185424804687500e+02 -1.047500000000000000e+02 4.575000000000000000e+01
8.000000000000000000e+00 3.802076923076923549e+02 1.867716369628906250e+02 4.808135986328125000e+00 0.000000000000000000e+00 5.882353186607360840e-01 3.383101074218750000e+03 3.726618289947509766e+00 1.000000000000000000e+00 1.041074218750000000e+03 -1.042500000000000000e+02 4.575000000000000000e+01
5.000000000000000000e+00 3.630076923076923094e+02 1.740420074462890625e+02 4.725433349609375000e+00 0.000000000000000000e+00 0.000000000000000000e+00 3.374221923828125000e+03 3.831869363784790039e+00 1.000000000000000000e+00 9.661566772460937500e+02 -1.037500000000000000e+02 4.575000000000000000e+01
8.000000000000000000e+00 3.586769230769231740e+02 1.767017974853515625e+02 4.642730712890625000e+00 0.000000000000000000e+00 0.000000000000000000e+00 3.366237060546875000e+03 3.833910703659057617e+00 1.000000000000000000e+00 9.048753662109375000e+02 -1.032500000000000000e+02 4.575000000000000000e+01
3.000000000000000000e+00 3.681923076923077360e+02 1.932738800048828125e+02 4.551025390625000000e+00 0.000000000000000000e+00 2.352941185235977173e-01 3.353441406250000000e+03 3.839887619018554688e+00 1.000000000000000000e+00 8.481588745117187500e+02 -1.027500000000000000e+02 4.575000000000000000e+01
5.000000000000000000e+00 4.194692307692305917e+02 2.152783508300781250e+02 4.361602783203125000e+00 0.000000000000000000e+00 3.529411852359771729e-01 3.344212890625000000e+03 3.876293420791625977e+00 1.000000000000000000e+00 6.848190307617187500e+02 -1.017500000000000000e+02 4.575000000000000000e+01
7.000000000000000000e+00 4.364384615384612971e+02 2.185375518798828125e+02 4.266876220703125000e+00 0.000000000000000000e+00 4.705882370471954346e-01 3.341753173828125000e+03 3.881774663925170898e+00 1.000000000000000000e+00 5.961851196289062500e+02 -1.012500000000000000e+02 4.575000000000000000e+01
1.000000000000000000e+00 4.345000000000001137e+02 2.166190338134765625e+02 4.294616699218750000e+00 0.000000000000000000e+00 8.235294222831726074e-01 3.330469238281250000e+03 3.910494089126586914e+00 1.000000000000000000e+00 6.131783447265625000e+02 -1.007500000000000000e+02 4.575000000000000000e+01
3.000000000000000000e+00 4.630076923076922526e+02 2.060798339843750000e+02 4.322357177734375000e+00 0.000000000000000000e+00 8.235294222831726074e-01 3.333533691406250000e+03 3.887287378311157227e+00 1.000000000000000000e+00 5.866370849609375000e+02 -1.002500000000000000e+02 4.575000000000000000e+01
5.700000000000000000e+01 1.592807692307691468e+03 6.149839477539062500e+02 7.913818359375000000e+00 0.000000000000000000e+00 5.882352963089942932e-02 3.664464599609375000e+03 2.589055538177490234e+00 4.000000000000000000e+00 2.841430358886718750e+02 -1.232500000000000000e+02 4.625000000000000000e+01
6.100000000000000000e+01 1.493761538461538066e+03 5.947539672851562500e+02 7.219329833984375000e+00 0.000000000000000000e+00 0.000000000000000000e+00 3.560503906250000000e+03 2.586648941040039062e+00 4.000000000000000000e+00 2.810413208007812500e+02 -1.227500000000000000e+02 4.625000000000000000e+01
1.100000000000000000e+01 2.116646153846153538e+03 6.609738769531250000e+02 6.524841308593750000e+00 0.000000000000000000e+00 0.000000000000000000e+00 3.273321289062500000e+03 2.353681564331054688e+00 1.000000000000000000e+00 9.669095458984375000e+02 -1.222500000000000000e+02 4.625000000000000000e+01
7.600000000000000000e+01 1.858407692307692287e+03 6.586012573242187500e+02 5.957763671875000000e+00 0.000000000000000000e+00 2.352941185235977173e-01 3.237469238281250000e+03 2.239668369293212891e+00 4.000000000000000000e+00 1.206273193359375000e+03 -1.217500000000000000e+02 4.625000000000000000e+01
4.500000000000000000e+01 1.127738461538461706e+03 5.674865722656250000e+02 5.772918701171875000e+00 0.000000000000000000e+00 4.705882370471954346e-01 3.253563476562500000e+03 2.276426315307617188e+00 4.000000000000000000e+00 1.091559570312500000e+03 -1.212500000000000000e+02 4.625000000000000000e+01
6.000000000000000000e+00 3.761153846153846416e+02 3.513985290527343750e+02 5.588043212890625000e+00 0.000000000000000000e+00 0.000000000000000000e+00 3.220743408203125000e+03 2.805913925170898438e+00 1.000000000000000000e+00 8.770693359375000000e+02 -1.207500000000000000e+02 4.625000000000000000e+01
6.000000000000000000e+00 1.989538461538460297e+02 1.777115783691406250e+02 5.403198242187500000e+00 0.000000000000000000e+00 5.294117927551269531e-01 3.048005126953125000e+03 3.399662494659423828e+00 1.000000000000000000e+00 2.662948608398437500e+02 -1.202500000000000000e+02 4.625000000000000000e+01
5.000000000000000000e+00 2.775000000000000568e+02 1.520032196044921875e+02 4.763854980468750000e+00 0.000000000000000000e+00 1.294117689132690430e+00 2.953810058593750000e+03 4.500523567199707031e+00 1.000000000000000000e+00 2.853581237792968750e+02 -1.187500000000000000e+02 4.625000000000000000e+01
3.000000000000000000e+00 4.764307692307694424e+02 2.875387268066406250e+02 4.545074462890625000e+00 0.000000000000000000e+00 1.352941155433654785e+00 2.828760986328125000e+03 4.333793640136718750e+00 1.000000000000000000e+00 4.090560607910156250e+02 -1.182500000000000000e+02 4.625000000000000000e+01
5.600000000000000000e+01 5.062923076923077588e+02 4.263088989257812500e+02 4.146301269531250000e+00 0.000000000000000000e+00 2.941176414489746094e+00 2.794702148437500000e+03 3.190964698791503906e+00 4.000000000000000000e+00 1.194411621093750000e+03 -1.177500000000000000e+02 4.625000000000000000e+01
2.000000000000000000e+00 4.600384615384618314e+02 3.309536132812500000e+02 3.687500000000000000e+00 0.000000000000000000e+00 1.117647051811218262e+00 2.709930175781250000e+03 4.105258941650390625e+00 1.000000000000000000e+00 8.644212646484375000e+02 -1.172500000000000000e+02 4.625000000000000000e+01
4.500000000000000000e+01 5.427615384615385210e+02 2.852466735839843750e+02 3.228698730468750000e+00 0.000000000000000000e+00 1.529411792755126953e+00 2.637511718750000000e+03 4.135430335998535156e+00 4.000000000000000000e+00 1.109067382812500000e+03 -1.167500000000000000e+02 4.625000000000000000e+01
7.300000000000000000e+01 6.738153846153849145e+02 5.489719238281250000e+02 2.229583740234375000e+00 0.000000000000000000e+00 7.058823704719543457e-01 2.459031250000000000e+03 2.447913408279418945e+00 4.000000000000000000e+00 1.079751220703125000e+03 -1.157500000000000000e+02 4.625000000000000000e+01
3.600000000000000000e+01 5.701769230769233445e+02 6.070809326171875000e+02 1.689239501953125000e+00 0.000000000000000000e+00 0.000000000000000000e+00 2.399264892578125000e+03 2.239348888397216797e+00 3.000000000000000000e+00 1.605747924804687500e+03 -1.152500000000000000e+02 4.625000000000000000e+01
5.900000000000000000e+01 4.390846153846153470e+02 5.594276733398437500e+02 1.148895263671875000e+00 0.000000000000000000e+00 1.058823585510253906e+00 2.257133056640625000e+03 2.123803138732910156e+00 4.000000000000000000e+00 1.598050781250000000e+03 -1.147500000000000000e+02 4.625000000000000000e+01
3.400000000000000000e+01 3.381846153846154266e+02 3.610710144042968750e+02 6.969299316406250000e-01 0.000000000000000000e+00 1.235294103622436523e+00 2.236266113281250000e+03 2.248974323272705078e+00 3.000000000000000000e+00 1.719233398437500000e+03 -1.142500000000000000e+02 4.625000000000000000e+01
2.100000000000000000e+01 3.464461538461537771e+02 2.642116088867187500e+02 1.959228515625000000e-01 0.000000000000000000e+00 0.000000000000000000e+00 2.282514892578125000e+03 2.290971994400024414e+00 3.000000000000000000e+00 1.992111083984375000e+03 -1.122500000000000000e+02 4.625000000000000000e+01
2.600000000000000000e+01 3.734769230769230717e+02 1.851010437011718750e+02 5.022583007812500000e-01 0.000000000000000000e+00 0.000000000000000000e+00 2.400446044921875000e+03 3.422381877899169922e+00 3.000000000000000000e+00 1.866824218750000000e+03 -1.117500000000000000e+02 4.625000000000000000e+01
3.100000000000000000e+01 4.227153846153842665e+02 2.638283996582031250e+02 8.085937500000000000e-01 0.000000000000000000e+00 4.117647111415863037e-01 2.462385009765625000e+03 3.113366603851318359e+00 3.000000000000000000e+00 1.730005981445312500e+03 -1.112500000000000000e+02 4.625000000000000000e+01
5.000000000000000000e+00 4.044384615384615813e+02 3.569676208496093750e+02 1.114929199218750000e+00 0.000000000000000000e+00 2.941176593303680420e-01 2.578066162109375000e+03 1.294380784034729004e+00 1.000000000000000000e+00 1.678035400390625000e+03 -1.107500000000000000e+02 4.625000000000000000e+01
3.000000000000000000e+00 3.889769230769231285e+02 2.234486236572265625e+02 2.225769042968750000e+00 0.000000000000000000e+00 0.000000000000000000e+00 2.766115478515625000e+03 3.675563573837280273e+00 1.000000000000000000e+00 1.364005371093750000e+03 -1.097500000000000000e+02 4.625000000000000000e+01
9.000000000000000000e+00 3.756153846153844142e+02 1.694148254394531250e+02 2.816772460937500000e+00 0.000000000000000000e+00 3.529411852359771729e-01 2.859956054687500000e+03 3.778988361358642578e+00 1.000000000000000000e+00 1.169747436523437500e+03 -1.092500000000000000e+02 4.625000000000000000e+01
1.500000000000000000e+01 3.593999999999999773e+02 1.602797851562500000e+02 3.407775878906250000e+00 0.000000000000000000e+00 2.941176593303680420e-01 3.022306396484375000e+03 3.732925653457641602e+00 1.000000000000000000e+00 1.101031127929687500e+03 -1.087500000000000000e+02 4.625000000000000000e+01
1.000000000000000000e+00 3.557307692307691127e+02 1.737257843017578125e+02 3.793823242187500000e+00 0.000000000000000000e+00 8.823529481887817383e-01 3.088929931640625000e+03 3.362066507339477539e+00 1.000000000000000000e+00 1.169681518554687500e+03 -1.082500000000000000e+02 4.625000000000000000e+01
1.000000000000000000e+00 3.464076923076924004e+02 1.864553985595703125e+02 4.179870605468750000e+00 0.000000000000000000e+00 3.529411852359771729e-01 3.157908691406250000e+03 3.595371484756469727e+00 1.000000000000000000e+00 9.332085571289062500e+02 -1.077500000000000000e+02 4.625000000000000000e+01
3.000000000000000000e+00 3.453692307692306258e+02 1.816357116699218750e+02 4.565917968750000000e+00 0.000000000000000000e+00 2.352941185235977173e-01 3.311903076171875000e+03 3.640416860580444336e+00 1.000000000000000000e+00 8.737061157226562500e+02 -1.072500000000000000e+02 4.625000000000000000e+01
4.000000000000000000e+00 3.375692307692310692e+02 1.757928314208984375e+02 4.855773925781250000e+00 0.000000000000000000e+00 6.470588445663452148e-01 3.337521728515625000e+03 3.388258218765258789e+00 1.000000000000000000e+00 8.193965454101562500e+02 -1.067500000000000000e+02 4.625000000000000000e+01
6.000000000000000000e+00 3.325230769230768146e+02 1.618824615478515625e+02 4.857116699218750000e+00 0.000000000000000000e+00 2.941176593303680420e-01 3.350638183593750000e+03 3.630081892013549805e+00 1.000000000000000000e+00 7.896652832031250000e+02 -1.062500000000000000e+02 4.625000000000000000e+01
5.000000000000000000e+00 3.541153846153846416e+02 1.478033142089843750e+02 4.858428955078125000e+00 0.000000000000000000e+00 0.000000000000000000e+00 3.363230224609375000e+03 3.645079851150512695e+00 1.000000000000000000e+00 7.635844726562500000e+02 -1.057500000000000000e+02 4.625000000000000000e+01
1.000000000000000000e+00 4.167846153846153925e+02 1.584257507324218750e+02 4.859771728515625000e+00 0.000000000000000000e+00 0.000000000000000000e+00 3.387496093750000000e+03 3.924557685852050781e+00 1.000000000000000000e+00 7.896727905273437500e+02 -1.052500000000000000e+02 4.625000000000000000e+01
2.000000000000000000e+00 4.435076923076921389e+02 1.689656524658203125e+02 4.779510498046875000e+00 0.000000000000000000e+00 0.000000000000000000e+00 3.384722900390625000e+03 3.900996208190917969e+00 1.000000000000000000e+00 8.700382690429687500e+02 -1.047500000000000000e+02 4.625000000000000000e+01
1.000000000000000000e+00 4.167153846153848917e+02 1.802449645996093750e+02 4.617675781250000000e+00 0.000000000000000000e+00 0.000000000000000000e+00 3.389002685546875000e+03 3.855303287506103516e+00 1.000000000000000000e+00 9.600771484375000000e+02 -1.042500000000000000e+02 4.625000000000000000e+01
1.000000000000000000e+00 3.756461538461539362e+02 1.798527984619140625e+02 4.455810546875000000e+00 0.000000000000000000e+00 1.176470592617988586e-01 3.372072021484375000e+03 3.820609331130981445e+00 1.000000000000000000e+00 9.178685302734375000e+02 -1.037500000000000000e+02 4.625000000000000000e+01
0.000000000000000000e+00 3.664615384615383959e+02 1.761825256347656250e+02 4.293975830078125000e+00 0.000000000000000000e+00 2.941176593303680420e-01 3.315554443359375000e+03 3.805453062057495117e+00 1.000000000000000000e+00 8.784367675781250000e+02 -1.032500000000000000e+02 4.625000000000000000e+01
6.000000000000000000e+00 3.619846153846154948e+02 1.853360443115234375e+02 4.181762695312500000e+00 0.000000000000000000e+00 6.470588445663452148e-01 3.307794677734375000e+03 3.789425373077392578e+00 1.000000000000000000e+00 8.005103759765625000e+02 -1.027500000000000000e+02 4.625000000000000000e+01
4.000000000000000000e+00 3.969153846153845961e+02 1.899311676025390625e+02 3.990386962890625000e+00 0.000000000000000000e+00 0.000000000000000000e+00 3.335589111328125000e+03 3.817467212677001953e+00 1.000000000000000000e+00 6.955894165039062500e+02 -1.017500000000000000e+02 4.625000000000000000e+01
7.000000000000000000e+00 4.189538461538461434e+02 2.021135864257812500e+02 3.894683837890625000e+00 0.000000000000000000e+00 0.000000000000000000e+00 3.282765380859375000e+03 3.812354564666748047e+00 1.000000000000000000e+00 6.290775146484375000e+02 -1.012500000000000000e+02 4.625000000000000000e+01
5.000000000000000000e+00 4.527461538461536747e+02 2.097980041503906250e+02 3.943634033203125000e+00 0.000000000000000000e+00 2.352941185235977173e-01 3.325674804687500000e+03 3.792600870132446289e+00 1.000000000000000000e+00 5.415242919921875000e+02 -1.007500000000000000e+02 4.625000000000000000e+01
4.000000000000000000e+00 4.553461538461538680e+02 2.191775512695312500e+02 3.992553710937500000e+00 0.000000000000000000e+00 2.941176593303680420e-01 3.332849365234375000e+03 3.786752223968505859e+00 1.000000000000000000e+00 5.527991333007812500e+02 -1.002500000000000000e+02 4.625000000000000000e+01
6.400000000000000000e+01 1.602646153846153993e+03 6.121586914062500000e+02 7.995147705078125000e+00 0.000000000000000000e+00 0.000000000000000000e+00 3.634761718750000000e+03 2.614599704742431641e+00 4.000000000000000000e+00 1.220056152343750000e+02 -1.232500000000000000e+02 4.675000000000000000e+01
5.200000000000000000e+01 1.328630769230768919e+03 5.769000854492187500e+02 7.366333007812500000e+00 0.000000000000000000e+00 0.000000000000000000e+00 3.474540771484375000e+03 2.615198135375976562e+00 4.000000000000000000e+00 1.456142883300781250e+02 -1.227500000000000000e+02 4.675000000000000000e+01
4.700000000000000000e+01 1.933915384615384937e+03 6.518492431640625000e+02 6.220336914062500000e+00 0.000000000000000000e+00 0.000000000000000000e+00 3.188230468750000000e+03 2.191069841384887695e+00 4.000000000000000000e+00 1.464969970703125000e+03 -1.217500000000000000e+02 4.675000000000000000e+01
6.500000000000000000e+01 1.261730769230769283e+03 5.915612182617187500e+02 6.038085937500000000e+00 0.000000000000000000e+00 0.000000000000000000e+00 3.164535400390625000e+03 2.136609077453613281e+00 4.000000000000000000e+00 1.450888061523437500e+03 -1.212500000000000000e+02 4.675000000000000000e+01
5.000000000000000000e+00 3.409769230769228443e+02 3.522915649414062500e+02 5.855804443359375000e+00 0.000000000000000000e+00 2.352941185235977173e-01 3.140840576171875000e+03 3.421410799026489258e+00 1.000000000000000000e+00 7.815430297851562500e+02 -1.207500000000000000e+02 4.675000000000000000e+01
2.000000000000000000e+00 1.418000000000000114e+02 1.462447052001953125e+02 5.673553466796875000e+00 0.000000000000000000e+00 0.000000000000000000e+00 3.117145751953125000e+03 2.201986312866210938e+00 1.000000000000000000e+00 7.077813720703125000e+02 -1.202500000000000000e+02 4.675000000000000000e+01
0.000000000000000000e+00 1.328384615384615586e+02 1.109687500000000000e+02 5.459136962890625000e+00 0.000000000000000000e+00 8.235294222831726074e-01 3.075937744140625000e+03 3.020125389099121094e+00 1.000000000000000000e+00 3.454535522460937500e+02 -1.197500000000000000e+02 4.675000000000000000e+01
0.000000000000000000e+00 2.470999999999999659e+02 1.397449188232421875e+02 4.965911865234375000e+00 0.000000000000000000e+00 1.117647051811218262e+00 2.958496582031250000e+03 2.448948144912719727e+00 1.000000000000000000e+00 3.816527099609375000e+02 -1.187500000000000000e+02 4.675000000000000000e+01
2.000000000000000000e+00 3.235384615384616041e+02 2.013815307617187500e+02 4.719299316406250000e+00 0.000000000000000000e+00 9.411764740943908691e-01 2.899775878906250000e+03 2.321405410766601562e+00 1.000000000000000000e+00 3.687482299804687500e+02 -1.182500000000000000e+02 4.675000000000000000e+01
4.000000000000000000e+00 3.755923076923076565e+02 2.687929992675781250e+02 4.303222656250000000e+00 0.000000000000000000e+00 2.941176593303680420e-01 2.809367919921875000e+03 4.232812881469726562e+00 1.000000000000000000e+00 4.982291870117187500e+02 -1.177500000000000000e+02 4.675000000000000000e+01
4.000000000000000000e+00 4.684923076923074063e+02 3.070949401855468750e+02 3.830657958984375000e+00 0.000000000000000000e+00 2.294117689132690430e+00 2.708397705078125000e+03 4.184012889862060547e+00 1.000000000000000000e+00 7.544389648437500000e+02 -1.172500000000000000e+02 4.675000000000000000e+01
2.700000000000000000e+01 6.416615384615381572e+02 4.482746276855468750e+02 3.358093261718750000e+00 0.000000000000000000e+00 1.176470637321472168e+00 2.607427246093750000e+03 3.398924112319946289e+00 3.000000000000000000e+00 8.367127685546875000e+02 -1.167500000000000000e+02 4.675000000000000000e+01
5.800000000000000000e+01 7.876615384615386120e+02 5.567056884765625000e+02 2.885498046875000000e+00 0.000000000000000000e+00 0.000000000000000000e+00 2.506457031250000000e+03 2.529758691787719727e+00 4.000000000000000000e+00 9.097172241210937500e+02 -1.162500000000000000e+02 4.675000000000000000e+01
3.300000000000000000e+01 7.879307692307695561e+02 6.319589233398437500e+02 2.378723144531250000e+00 0.000000000000000000e+00 2.352941185235977173e-01 2.418593017578125000e+03 2.347678899765014648e+00 3.000000000000000000e+00 1.179509033203125000e+03 -1.157500000000000000e+02 4.675000000000000000e+01
6.300000000000000000e+01 6.098307692307688512e+02 6.505554809570312500e+02 1.871948242187500000e+00 0.000000000000000000e+00 6.470588445663452148e-01 2.330729248046875000e+03 2.192387819290161133e+00 4.000000000000000000e+00 1.544061889648437500e+03 -1.152500000000000000e+02 4.675000000000000000e+01
6.400000000000000000e+01 4.475307692307693515e+02 5.653915405273437500e+02 1.365173339843750000e+00 0.000000000000000000e+00 7.058823704719543457e-01 2.242865478515625000e+03 2.118382930755615234e+00 4.000000000000000000e+00 1.863791870117187500e+03 -1.147500000000000000e+02 4.675000000000000000e+01
2.900000000000000000e+01 3.965000000000002842e+02 3.213984069824218750e+02 9.601440429687500000e-01 0.000000000000000000e+00 2.352941185235977173e-01 2.178938232421875000e+03 2.207187652587890625e+00 3.000000000000000000e+00 1.409171508789062500e+03 -1.142500000000000000e+02 4.675000000000000000e+01
4.200000000000000000e+01 3.207307692307691696e+02 3.111162109375000000e+02 8.604125976562500000e-01 0.000000000000000000e+00 5.294117927551269531e-01 2.186821533203125000e+03 2.213903188705444336e+00 3.000000000000000000e+00 1.353255493164062500e+03 -1.137500000000000000e+02 4.675000000000000000e+01
3.300000000000000000e+01 2.888692307692307395e+02 3.077062683105468750e+02 7.606811523437500000e-01 0.000000000000000000e+00 4.117647111415863037e-01 2.194704589843750000e+03 2.327782392501831055e+00 3.000000000000000000e+00 1.587174438476562500e+03 -1.132500000000000000e+02 4.675000000000000000e+01
7.000000000000000000e+00 3.199923076923075769e+02 3.239222106933593750e+02 6.609191894531250000e-01 0.000000000000000000e+00 2.352941185235977173e-01 2.202587890625000000e+03 2.389403104782104492e+00 1.000000000000000000e+00 1.546779052734375000e+03 -1.127500000000000000e+02 4.675000000000000000e+01
4.000000000000000000e+00 3.153846153846155858e+02 2.999081115722656250e+02 7.891845703125000000e-01 0.000000000000000000e+00 4.705882370471954346e-01 2.250194824218750000e+03 2.345552682876586914e+00 1.000000000000000000e+00 1.518470214843750000e+03 -1.122500000000000000e+02 4.675000000000000000e+01
4.200000000000000000e+01 3.460000000000002274e+02 2.569897155761718750e+02 1.145477294921875000e+00 0.000000000000000000e+00 8.235294222831726074e-01 2.337525878906250000e+03 2.788992643356323242e+00 3.000000000000000000e+00 1.482309692382812500e+03 -1.117500000000000000e+02 4.675000000000000000e+01
2.000000000000000000e+00 3.729076923076924004e+02 3.602467651367187500e+02 1.501739501953125000e+00 0.000000000000000000e+00 2.352941185235977173e-01 2.424856933593750000e+03 2.873927116394042969e+00 1.000000000000000000e+00 1.570304809570312500e+03 -1.112500000000000000e+02 4.675000000000000000e+01
7.000000000000000000e+00 3.777076923076922412e+02 2.712533569335937500e+02 2.882202148437500000e+00 0.000000000000000000e+00 8.823529481887817383e-01 2.766246093750000000e+03 3.308242559432983398e+00 1.000000000000000000e+00 1.379353515625000000e+03 -1.097500000000000000e+02 4.675000000000000000e+01
1.100000000000000000e+01 3.488307692307690786e+02 1.861326446533203125e+02 3.950897216796875000e+00 0.000000000000000000e+00 3.529411852359771729e-01 3.031646484375000000e+03 3.582795143127441406e+00 1.000000000000000000e+00 1.215498535156250000e+03 -1.087500000000000000e+02 4.675000000000000000e+01
1.000000000000000000e+00 3.290999999999997954e+02 1.699135894775390625e+02 4.250610351562500000e+00 0.000000000000000000e+00 4.117647111415863037e-01 3.129307128906250000e+03 3.828811645507812500e+00 1.000000000000000000e+00 9.686076049804687500e+02 -1.082500000000000000e+02 4.675000000000000000e+01
2.000000000000000000e+00 3.289384615384615245e+02 1.792972564697265625e+02 4.550354003906250000e+00 0.000000000000000000e+00 0.000000000000000000e+00 3.226967773437500000e+03 2.915812492370605469e+00 1.000000000000000000e+00 9.114133300781250000e+02 -1.077500000000000000e+02 4.675000000000000000e+01
0.000000000000000000e+00 3.308384615384614449e+02 1.712577819824218750e+02 4.850067138671875000e+00 0.000000000000000000e+00 0.000000000000000000e+00 3.324628173828125000e+03 2.046703577041625977e+00 1.000000000000000000e+00 8.980895385742187500e+02 -1.072500000000000000e+02 4.675000000000000000e+01
1.000000000000000000e+00 3.269000000000001478e+02 1.527278594970703125e+02 5.051544189453125000e+00 0.000000000000000000e+00 2.352941185235977173e-01 3.400289306640625000e+03 2.047773122787475586e+00 1.000000000000000000e+00 8.838076782226562500e+02 -1.067500000000000000e+02 4.675000000000000000e+01
0.000000000000000000e+00 3.293923076923080089e+02 1.409511108398437500e+02 4.958221435546875000e+00 0.000000000000000000e+00 0.000000000000000000e+00 3.409952392578125000e+03 2.228572368621826172e+00 1.000000000000000000e+00 8.735794677734375000e+02 -1.062500000000000000e+02 4.675000000000000000e+01
3.000000000000000000e+00 3.728461538461538680e+02 1.415375823974609375e+02 4.864898681640625000e+00 0.000000000000000000e+00 0.000000000000000000e+00 3.419615234375000000e+03 2.142149925231933594e+00 1.000000000000000000e+00 8.525288696289062500e+02 -1.057500000000000000e+02 4.675000000000000000e+01
1.000000000000000000e+00 4.425615384615384187e+02 1.563963775634765625e+02 4.771606445312500000e+00 0.000000000000000000e+00 2.352941185235977173e-01 3.429278320312500000e+03 3.393479108810424805e+00 1.000000000000000000e+00 7.587098999023437500e+02 -1.052500000000000000e+02 4.675000000000000000e+01
4.000000000000000000e+00 4.498846153846159268e+02 1.644709930419921875e+02 4.609985351562500000e+00 0.000000000000000000e+00 5.882353186607360840e-01 3.419268554687500000e+03 3.848288774490356445e+00 1.000000000000000000e+00 7.565676879882812500e+02 -1.047500000000000000e+02 4.675000000000000000e+01
4.000000000000000000e+00 4.120307692307693515e+02 1.790699005126953125e+02 4.380035400390625000e+00 0.000000000000000000e+00 0.000000000000000000e+00 3.389586181640625000e+03 3.793369770050048828e+00 1.000000000000000000e+00 9.012271118164062500e+02 -1.042500000000000000e+02 4.675000000000000000e+01
5.000000000000000000e+00 3.838923076923077247e+02 1.802990417480468750e+02 4.150085449218750000e+00 0.000000000000000000e+00 7.058823704719543457e-01 3.359903808593750000e+03 3.757860183715820312e+00 1.000000000000000000e+00 8.257086181640625000e+02 -1.037500000000000000e+02 4.675000000000000000e+01
4.000000000000000000e+00 3.713153846153844597e+02 1.702406768798828125e+02 3.920135498046875000e+00 0.000000000000000000e+00 2.941176593303680420e-01 3.330221435546875000e+03 3.745823144912719727e+00 1.000000000000000000e+00 8.341164550781250000e+02 -1.032500000000000000e+02 4.675000000000000000e+01
5.000000000000000000e+00 3.841846153846155403e+02 1.786345520019531250e+02 3.792449951171875000e+00 0.000000000000000000e+00 2.941176593303680420e-01 3.315535400390625000e+03 3.737932920455932617e+00 1.000000000000000000e+00 7.718795776367187500e+02 -1.027500000000000000e+02 4.675000000000000000e+01
5.000000000000000000e+00 3.652846153846155062e+02 1.797136230468750000e+02 3.698822021484375000e+00 0.000000000000000000e+00 2.352941185235977173e-01 3.305848388671875000e+03 3.734920501708984375e+00 1.000000000000000000e+00 7.026195068359375000e+02 -1.022500000000000000e+02 4.675000000000000000e+01
4.000000000000000000e+00 4.099846153846153243e+02 1.770519866943359375e+02 3.605194091796875000e+00 0.000000000000000000e+00 0.000000000000000000e+00 3.296161132812500000e+03 3.742575407028198242e+00 1.000000000000000000e+00 6.885114746093750000e+02 -1.017500000000000000e+02 4.675000000000000000e+01
6.000000000000000000e+00 4.574307692307691013e+02 2.048464202880859375e+02 3.511596679687500000e+00 0.000000000000000000e+00 0.000000000000000000e+00 3.286474121093750000e+03 3.720828771591186523e+00 1.000000000000000000e+00 6.171341552734375000e+02 -1.012500000000000000e+02 4.675000000000000000e+01
5.000000000000000000e+00 4.837769230769232536e+02 2.180747985839843750e+02 3.579589843750000000e+00 0.000000000000000000e+00 0.000000000000000000e+00 3.300136474609375000e+03 3.711968660354614258e+00 1.000000000000000000e+00 5.092751770019531250e+02 -1.007500000000000000e+02 4.675000000000000000e+01
5.200000000000000000e+01 2.747192307692306713e+03 6.649823608398437500e+02 7.964294433593750000e+00 0.000000000000000000e+00 0.000000000000000000e+00 3.561778808593750000e+03 2.604146242141723633e+00 4.000000000000000000e+00 1.907066955566406250e+02 -1.237500000000000000e+02 4.725000000000000000e+01
6.600000000000000000e+01 1.751176923076924368e+03 6.522858886718750000e+02 7.363342285156250000e+00 0.000000000000000000e+00 0.000000000000000000e+00 3.415091796875000000e+03 2.633734941482543945e+00 4.000000000000000000e+00 1.300086517333984375e+02 -1.232500000000000000e+02 4.725000000000000000e+01
1.000000000000000000e+01 1.038938461538461524e+03 5.505698242187500000e+02 6.161468505859375000e+00 0.000000000000000000e+00 0.000000000000000000e+00 3.121717773437500000e+03 2.743133783340454102e+00 1.000000000000000000e+00 1.048763580322265625e+02 -1.222500000000000000e+02 4.725000000000000000e+01
6.900000000000000000e+01 2.229884615384615245e+03 6.413749389648437500e+02 5.659545898437500000e+00 0.000000000000000000e+00 0.000000000000000000e+00 3.006158203125000000e+03 2.513885498046875000e+00 4.000000000000000000e+00 6.134566040039062500e+02 -1.217500000000000000e+02 4.725000000000000000e+01
6.100000000000000000e+01 1.435684615384616563e+03 6.553176879882812500e+02 5.454711914062500000e+00 0.000000000000000000e+00 8.235294222831726074e-01 2.983980224609375000e+03 2.280065298080444336e+00 4.000000000000000000e+00 9.901130371093750000e+02 -1.212500000000000000e+02 4.725000000000000000e+01
6.100000000000000000e+01 5.932615384615385210e+02 4.861933593750000000e+02 5.249908447265625000e+00 0.000000000000000000e+00 7.058823704719543457e-01 2.961802246093750000e+03 2.531803131103515625e+00 4.000000000000000000e+00 1.067108276367187500e+03 -1.207500000000000000e+02 4.725000000000000000e+01
2.400000000000000000e+01 2.362846153846154493e+02 2.461626892089843750e+02 5.045074462890625000e+00 0.000000000000000000e+00 4.705882370471954346e-01 2.939624267578125000e+03 2.178804636001586914e+00 3.000000000000000000e+00 1.238186401367187500e+03 -1.202500000000000000e+02 4.725000000000000000e+01
1.000000000000000000e+00 2.094999999999999432e+02 1.371409149169921875e+02 4.311431884765625000e+00 0.000000000000000000e+00 9.411764740943908691e-01 2.794249511718750000e+03 2.357105016708374023e+00 1.000000000000000000e+00 5.214158935546875000e+02 -1.187500000000000000e+02 4.725000000000000000e+01
2.000000000000000000e+00 2.583384615384616723e+02 1.906089019775390625e+02 4.058929443359375000e+00 0.000000000000000000e+00 0.000000000000000000e+00 2.740535156250000000e+03 2.240097999572753906e+00 1.000000000000000000e+00 5.874266967773437500e+02 -1.182500000000000000e+02 4.725000000000000000e+01
5.000000000000000000e+00 3.668846153846153584e+02 2.492277526855468750e+02 3.666992187500000000e+00 0.000000000000000000e+00 0.000000000000000000e+00 2.662634277343750000e+03 3.578679084777832031e+00 1.000000000000000000e+00 6.706182861328125000e+02 -1.177500000000000000e+02 4.725000000000000000e+01
8.000000000000000000e+00 5.127384615384614790e+02 3.123017272949218750e+02 3.228576660156250000e+00 0.000000000000000000e+00 4.705882370471954346e-01 2.576671142578125000e+03 3.963455915451049805e+00 1.000000000000000000e+00 7.544638061523437500e+02 -1.172500000000000000e+02 4.725000000000000000e+01
4.100000000000000000e+01 7.392769230769232536e+02 4.548070983886718750e+02 2.790161132812500000e+00 0.000000000000000000e+00 1.117647051811218262e+00 2.490708007812500000e+03 2.770161628723144531e+00 3.000000000000000000e+00 9.471166992187500000e+02 -1.167500000000000000e+02 4.725000000000000000e+01
3.200000000000000000e+01 9.409153846153847098e+02 5.644319458007812500e+02 2.351745605468750000e+00 0.000000000000000000e+00 2.352941185235977173e-01 2.404744628906250000e+03 2.333306550979614258e+00 3.000000000000000000e+00 9.718350830078125000e+02 -1.162500000000000000e+02 4.725000000000000000e+01
6.000000000000000000e+01 8.879230769230772466e+02 6.306071777343750000e+02 1.976318359375000000e+00 0.000000000000000000e+00 2.352941185235977173e-01 2.343325927734375000e+03 2.221303462982177734e+00 4.000000000000000000e+00 1.170162231445312500e+03 -1.157500000000000000e+02 4.725000000000000000e+01
5.900000000000000000e+01 6.645846153846154039e+02 5.165820312500000000e+02 1.600860595703125000e+00 0.000000000000000000e+00 0.000000000000000000e+00 2.281907226562500000e+03 2.164935111999511719e+00 4.000000000000000000e+00 1.389032836914062500e+03 -1.152500000000000000e+02 4.725000000000000000e+01
4.100000000000000000e+01 4.889384615384618087e+02 4.194403991699218750e+02 1.225433349609375000e+00 0.000000000000000000e+00 5.882353186607360840e-01 2.220488281250000000e+03 2.604472160339355469e+00 3.000000000000000000e+00 1.643805786132812500e+03 -1.147500000000000000e+02 4.725000000000000000e+01
4.200000000000000000e+01 3.787846153846154493e+02 3.525540771484375000e+02 9.432983398437500000e-01 0.000000000000000000e+00 6.470588445663452148e-01 2.180686767578125000e+03 3.386330842971801758e+00 3.000000000000000000e+00 9.955653686523437500e+02 -1.142500000000000000e+02 4.725000000000000000e+01
5.300000000000000000e+01 3.595307692307692946e+02 4.770409240722656250e+02 9.410705566406250000e-01 0.000000000000000000e+00 5.294117927551269531e-01 2.205737060546875000e+03 2.113864421844482422e+00 4.000000000000000000e+00 1.945607910156250000e+03 -1.137500000000000000e+02 4.725000000000000000e+01
2.900000000000000000e+01 3.607538461538463253e+02 4.162661437988281250e+02 9.388427734375000000e-01 9.999999776482582092e-03 1.117647051811218262e+00 2.230787109375000000e+03 2.098239660263061523e+00 3.000000000000000000e+00 1.995251464843750000e+03 -1.132500000000000000e+02 4.725000000000000000e+01
6.000000000000000000e+00 3.121230769230768942e+02 2.833214721679687500e+02 1.125091552734375000e+00 0.000000000000000000e+00 2.941176593303680420e-01 2.316707275390625000e+03 3.375539064407348633e+00 1.000000000000000000e+00 1.304160888671875000e+03 -1.122500000000000000e+02 4.725000000000000000e+01
2.000000000000000000e+00 3.747307692307693969e+02 1.927749023437500000e+02 1.504211425781250000e+00 0.000000000000000000e+00 5.882352963089942932e-02 2.413396728515625000e+03 3.650040626525878906e+00 1.000000000000000000e+00 1.130923583984375000e+03 -1.117500000000000000e+02 4.725000000000000000e+01
6.000000000000000000e+00 3.611846153846153697e+02 2.068322753906250000e+02 1.883361816406250000e+00 0.000000000000000000e+00 2.941176593303680420e-01 2.510086181640625000e+03 2.956548929214477539e+00 1.000000000000000000e+00 1.291713134765625000e+03 -1.112500000000000000e+02 4.725000000000000000e+01
9.000000000000000000e+00 3.516692307692309214e+02 2.688227233886718750e+02 2.262481689453125000e+00 0.000000000000000000e+00 0.000000000000000000e+00 2.606775634765625000e+03 3.404820203781127930e+00 1.000000000000000000e+00 1.366420410156250000e+03 -1.107500000000000000e+02 4.725000000000000000e+01
1.000000000000000000e+00 3.510692307692307850e+02 2.497813568115234375e+02 2.707092285156250000e+00 0.000000000000000000e+00 0.000000000000000000e+00 2.722212402343750000e+03 3.648334503173828125e+00 1.000000000000000000e+00 1.237072753906250000e+03 -1.102500000000000000e+02 4.725000000000000000e+01
1.100000000000000000e+01 3.662615384615382936e+02 2.104776000976562500e+02 3.173553466796875000e+00 0.000000000000000000e+00 6.470588445663452148e-01 2.843898437500000000e+03 3.691893100738525391e+00 1.000000000000000000e+00 1.086061889648437500e+03 -1.097500000000000000e+02 4.725000000000000000e+01
9.000000000000000000e+00 3.821384615384616268e+02 2.012837371826171875e+02 3.640014648437500000e+00 0.000000000000000000e+00 0.000000000000000000e+00 2.965584472656250000e+03 3.682274580001831055e+00 1.000000000000000000e+00 1.402520385742187500e+03 -1.092500000000000000e+02 4.725000000000000000e+01
7.000000000000000000e+00 3.480846153846155744e+02 1.821169891357421875e+02 4.106475830078125000e+00 0.000000000000000000e+00 5.882352963089942932e-02 3.087270507812500000e+03 3.783382654190063477e+00 1.000000000000000000e+00 9.809133300781250000e+02 -1.087500000000000000e+02 4.725000000000000000e+01
1.200000000000000000e+01 3.188153846153846303e+02 1.632760620117187500e+02 4.304901123046875000e+00 0.000000000000000000e+00 5.882352963089942932e-02 3.161798339843750000e+03 3.860487461090087891e+00 1.000000000000000000e+00 8.582817993164062500e+02 -1.082500000000000000e+02 4.725000000000000000e+01
5.000000000000000000e+00 3.123538461538461206e+02 1.634889831542968750e+02 4.503356933593750000e+00 0.000000000000000000e+00 7.647058963775634766e-01 3.236326171875000000e+03 3.049580335617065430e+00 1.000000000000000000e+00 8.612691650390625000e+02 -1.077500000000000000e+02 4.725000000000000000e+01
4.000000000000000000e+00 3.152076923076923549e+02 1.600846710205078125e+02 4.701782226562500000e+00 0.000000000000000000e+00 3.529411852359771729e-01 3.310853759765625000e+03 2.146009922027587891e+00 1.000000000000000000e+00 8.902537231445312500e+02 -1.072500000000000000e+02 4.725000000000000000e+01
1.000000000000000000e+00 3.210615384615383618e+02 1.453527526855468750e+02 4.812225341796875000e+00 0.000000000000000000e+00 2.941176593303680420e-01 3.365359375000000000e+03 2.037675857543945312e+00 1.000000000000000000e+00 8.225985107421875000e+02 -1.067500000000000000e+02 4.725000000000000000e+01
2.000000000000000000e+00 3.380538461538462798e+02 1.394691467285156250e+02 4.658691406250000000e+00 0.000000000000000000e+00 0.000000000000000000e+00 3.359798583984375000e+03 3.689341545104980469e+00 1.000000000000000000e+00 7.772671508789062500e+02 -1.062500000000000000e+02 4.725000000000000000e+01
0.000000000000000000e+00 3.777076923076922981e+02 1.424101562500000000e+02 4.505157470703125000e+00 0.000000000000000000e+00 2.941176593303680420e-01 3.354238037109375000e+03 3.876015424728393555e+00 1.000000000000000000e+00 8.265492553710937500e+02 -1.057500000000000000e+02 4.725000000000000000e+01
4.000000000000000000e+00 3.983692307692307395e+02 1.485694274902343750e+02 4.351623535156250000e+00 0.000000000000000000e+00 0.000000000000000000e+00 3.348677246093750000e+03 3.856363296508789062e+00 1.000000000000000000e+00 8.823294677734375000e+02 -1.052500000000000000e+02 4.725000000000000000e+01
3.000000000000000000e+00 3.740461538461540840e+02 1.523598632812500000e+02 4.153076171875000000e+00 0.000000000000000000e+00 2.941176593303680420e-01 3.329728759765625000e+03 3.834473133087158203e+00 1.000000000000000000e+00 7.463109130859375000e+02 -1.047500000000000000e+02 4.725000000000000000e+01
5.000000000000000000e+00 3.715076923076924800e+02 1.680107116699218750e+02 3.909545898437500000e+00 0.000000000000000000e+00 0.000000000000000000e+00 3.297392822265625000e+03 3.798341035842895508e+00 1.000000000000000000e+00 7.249975585937500000e+02 -1.042500000000000000e+02 4.725000000000000000e+01
1.000000000000000000e+00 3.805615384615384755e+02 1.794918823242187500e+02 3.665985107421875000e+00 0.000000000000000000e+00 0.000000000000000000e+00 3.265056884765625000e+03 3.779207944869995117e+00 1.000000000000000000e+00 6.872074584960937500e+02 -1.037500000000000000e+02 4.725000000000000000e+01
4.000000000000000000e+00 3.974615384615385096e+02 1.874999847412109375e+02 3.422454833984375000e+00 0.000000000000000000e+00 2.941176593303680420e-01 3.232720947265625000e+03 3.756290674209594727e+00 1.000000000000000000e+00 8.024483642578125000e+02 -1.032500000000000000e+02 4.725000000000000000e+01
6.000000000000000000e+00 3.898076923076920366e+02 1.914196319580078125e+02 3.304168701171875000e+00 0.000000000000000000e+00 0.000000000000000000e+00 3.219239990234375000e+03 3.749397993087768555e+00 1.000000000000000000e+00 6.916053466796875000e+02 -1.027500000000000000e+02 4.725000000000000000e+01
4.000000000000000000e+00 4.048615384615384301e+02 1.962992553710937500e+02 3.227661132812500000e+00 0.000000000000000000e+00 0.000000000000000000e+00 3.212044433593750000e+03 3.747205018997192383e+00 1.000000000000000000e+00 6.655668334960937500e+02 -1.022500000000000000e+02 4.725000000000000000e+01
4.000000000000000000e+00 4.369307692307692150e+02 2.021855316162109375e+02 3.151123046875000000e+00 0.000000000000000000e+00 5.882352963089942932e-02 3.204848632812500000e+03 3.714246749877929688e+00 1.000000000000000000e+00 5.952271118164062500e+02 -1.017500000000000000e+02 4.725000000000000000e+01
2.100000000000000000e+01 2.690192307692308077e+03 6.543631591796875000e+02 7.304656982421875000e+00 0.000000000000000000e+00 2.941176593303680420e-01 3.328574951171875000e+03 2.423252105712890625e+00 3.000000000000000000e+00 1.167061767578125000e+03 -1.237500000000000000e+02 4.775000000000000000e+01
2.200000000000000000e+01 1.891569230769231353e+03 6.379893188476562500e+02 6.731567382812500000e+00 0.000000000000000000e+00 0.000000000000000000e+00 3.195421875000000000e+03 2.428784847259521484e+00 3.000000000000000000e+00 1.264101440429687500e+03 -1.232500000000000000e+02 4.775000000000000000e+01
7.200000000000000000e+01 1.798653846153846189e+03 6.569544067382812500e+02 5.098785400390625000e+00 0.000000000000000000e+00 0.000000000000000000e+00 2.824085937500000000e+03 2.530384063720703125e+00 4.000000000000000000e+00 6.242059936523437500e+02 -1.217500000000000000e+02 4.775000000000000000e+01
7.200000000000000000e+01 1.496515384615385756e+03 6.805657958984375000e+02 4.871368408203125000e+00 0.000000000000000000e+00 0.000000000000000000e+00 2.803425048828125000e+03 2.165550708770751953e+00 4.000000000000000000e+00 1.125538452148437500e+03 -1.212500000000000000e+02 4.775000000000000000e+01
3.300000000000000000e+01 8.922615384615382936e+02 5.274717407226562500e+02 4.643981933593750000e+00 0.000000000000000000e+00 1.117647051811218262e+00 2.782763916015625000e+03 2.149273633956909180e+00 3.000000000000000000e+00 8.717946166992187500e+02 -1.207500000000000000e+02 4.775000000000000000e+01
2.000000000000000000e+00 3.711307692307692037e+02 3.052067871093750000e+02 4.416564941406250000e+00 0.000000000000000000e+00 1.176470637321472168e+00 2.762103027343750000e+03 3.080788135528564453e+00 1.000000000000000000e+00 6.272610473632812500e+02 -1.202500000000000000e+02 4.775000000000000000e+01
3.000000000000000000e+00 1.822076923076922981e+02 1.794528198242187500e+02 4.173675537109375000e+00 0.000000000000000000e+00 1.058823585510253906e+00 2.727418701171875000e+03 2.167985200881958008e+00 1.000000000000000000e+00 7.656343383789062500e+02 -1.197500000000000000e+02 4.775000000000000000e+01
2.000000000000000000e+00 2.284461538461540329e+02 1.742242126464843750e+02 3.656921386718750000e+00 0.000000000000000000e+00 8.823529481887817383e-01 2.630002685546875000e+03 3.925003051757812500e+00 1.000000000000000000e+00 6.742841186523437500e+02 -1.187500000000000000e+02 4.775000000000000000e+01
5.000000000000000000e+00 2.568076923076922071e+02 2.446272888183593750e+02 3.398559570312500000e+00 0.000000000000000000e+00 2.941176593303680420e-01 2.581294677734375000e+03 3.863849401473999023e+00 1.000000000000000000e+00 6.974080810546875000e+02 -1.182500000000000000e+02 4.775000000000000000e+01
2.000000000000000000e+00 5.388615384615383164e+02 3.340618591308593750e+02 2.626525878906250000e+00 0.000000000000000000e+00 0.000000000000000000e+00 2.444944580078125000e+03 3.686061382293701172e+00 1.000000000000000000e+00 6.931889648437500000e+02 -1.172500000000000000e+02 4.775000000000000000e+01
5.000000000000000000e+01 7.491000000000003638e+02 4.037808532714843750e+02 2.222259521484375000e+00 0.000000000000000000e+00 5.294117927551269531e-01 2.373988525390625000e+03 2.396301984786987305e+00 4.000000000000000000e+00 8.314124755859375000e+02 -1.167500000000000000e+02 4.775000000000000000e+01
6.100000000000000000e+01 9.104230769230767919e+02 5.460772094726562500e+02 1.818023681640625000e+00 0.000000000000000000e+00 5.882352963089942932e-02 2.303032470703125000e+03 2.324731349945068359e+00 4.000000000000000000e+00 1.178701782226562500e+03 -1.162500000000000000e+02 4.775000000000000000e+01
6.700000000000000000e+01 8.683153846153844597e+02 5.718823852539062500e+02 1.573913574218750000e+00 0.000000000000000000e+00 5.294117927551269531e-01 2.268058837890625000e+03 2.280663251876831055e+00 4.000000000000000000e+00 1.413295898437500000e+03 -1.157500000000000000e+02 4.775000000000000000e+01
6.400000000000000000e+01 6.325461538461538566e+02 3.865289611816406250e+02 1.329803466796875000e+00 0.000000000000000000e+00 0.000000000000000000e+00 2.233084960937500000e+03 2.209047317504882812e+00 4.000000000000000000e+00 1.738085937500000000e+03 -1.152500000000000000e+02 4.775000000000000000e+01
2.700000000000000000e+01 4.591923076923076223e+02 2.498888854980468750e+02 1.085693359375000000e+00 0.000000000000000000e+00 8.235294222831726074e-01 2.198111328125000000e+03 2.380989313125610352e+00 3.000000000000000000e+00 1.286819946289062500e+03 -1.147500000000000000e+02 4.775000000000000000e+01
4.700000000000000000e+01 4.269538461538459160e+02 5.469240112304687500e+02 1.021759033203125000e+00 0.000000000000000000e+00 0.000000000000000000e+00 2.224652587890625000e+03 2.036402702331542969e+00 4.000000000000000000e+00 1.567904907226562500e+03 -1.137500000000000000e+02 4.775000000000000000e+01
3.000000000000000000e+00 2.935076923076923094e+02 2.171089782714843750e+02 1.460968017578125000e+00 0.000000000000000000e+00 2.941176593303680420e-01 2.383219726562500000e+03 3.588345289230346680e+00 1.000000000000000000e+00 1.221200195312500000e+03 -1.122500000000000000e+02 4.775000000000000000e+01
3.000000000000000000e+00 3.231692307692308077e+02 1.610702514648437500e+02 1.862976074218750000e+00 0.000000000000000000e+00 0.000000000000000000e+00 2.489267578125000000e+03 3.549446105957031250e+00 1.000000000000000000e+00 1.141516357421875000e+03 -1.117500000000000000e+02 4.775000000000000000e+01
1.000000000000000000e+00 3.491615384615383277e+02 1.574191436767578125e+02 2.264953613281250000e+00 0.000000000000000000e+00 5.294117927551269531e-01 2.595315429687500000e+03 2.005425930023193359e+00 1.000000000000000000e+00 1.086936645507812500e+03 -1.112500000000000000e+02 4.775000000000000000e+01
3.000000000000000000e+00 3.492230769230769170e+02 1.744651794433593750e+02 2.666961669921875000e+00 0.000000000000000000e+00 5.882353186607360840e-01 2.701363281250000000e+03 2.569548845291137695e+00 1.000000000000000000e+00 9.292982177734375000e+02 -1.107500000000000000e+02 4.775000000000000000e+01
1.000000000000000000e+00 3.428076923076924345e+02 2.008076171875000000e+02 3.066375732421875000e+00 0.000000000000000000e+00 1.176470637321472168e+00 2.810879150390625000e+03 3.572561740875244141e+00 1.000000000000000000e+00 9.641944580078125000e+02 -1.102500000000000000e+02 4.775000000000000000e+01
1.000000000000000000e+00 3.494923076923074632e+02 2.105758056640625000e+02 3.464935302734375000e+00 0.000000000000000000e+00 5.294117927551269531e-01 2.921551025390625000e+03 2.731773853302001953e+00 1.000000000000000000e+00 9.373961791992187500e+02 -1.097500000000000000e+02 4.775000000000000000e+01
4.000000000000000000e+00 3.638923076923077815e+02 1.919552459716796875e+02 3.863494873046875000e+00 0.000000000000000000e+00 5.294117927551269531e-01 3.032222900390625000e+03 3.700781583786010742e+00 1.000000000000000000e+00 9.303168945312500000e+02 -1.092500000000000000e+02 4.775000000000000000e+01
2.000000000000000000e+00 3.596153846153846416e+02 1.735435333251953125e+02 4.262054443359375000e+00 0.000000000000000000e+00 2.941176593303680420e-01 3.142894531250000000e+03 3.741994142532348633e+00 1.000000000000000000e+00 9.270890502929687500e+02 -1.087500000000000000e+02 4.775000000000000000e+01
2.000000000000000000e+00 3.193076923076924345e+02 1.708006439208984375e+02 4.359191894531250000e+00 0.000000000000000000e+00 0.000000000000000000e+00 3.194289550781250000e+03 3.801644086837768555e+00 1.000000000000000000e+00 8.615532836914062500e+02 -1.082500000000000000e+02 4.775000000000000000e+01
0.000000000000000000e+00 3.052461538461540158e+02 1.520659942626953125e+02 4.456359863281250000e+00 0.000000000000000000e+00 2.941176593303680420e-01 3.245684570312500000e+03 2.014976263046264648e+00 1.000000000000000000e+00 7.348628540039062500e+02 -1.077500000000000000e+02 4.775000000000000000e+01
4.000000000000000000e+00 3.033692307692307395e+02 1.516272583007812500e+02 4.553497314453125000e+00 0.000000000000000000e+00 5.294117927551269531e-01 3.297079345703125000e+03 2.004074573516845703e+00 1.000000000000000000e+00 8.580634155273437500e+02 -1.072500000000000000e+02 4.775000000000000000e+01
1.000000000000000000e+00 3.643384615384613880e+02 1.374467620849609375e+02 4.145385742187500000e+00 0.000000000000000000e+00 0.000000000000000000e+00 3.288860595703125000e+03 2.908187150955200195e+00 1.000000000000000000e+00 7.522275390625000000e+02 -1.057500000000000000e+02 4.775000000000000000e+01
4.000000000000000000e+00 3.693153846153842323e+02 1.429629058837890625e+02 3.931610107421875000e+00 0.000000000000000000e+00 0.000000000000000000e+00 3.268076171875000000e+03 3.766719818115234375e+00 1.000000000000000000e+00 6.832718505859375000e+02 -1.052500000000000000e+02 4.775000000000000000e+01
0.000000000000000000e+00 3.659230769230768487e+02 1.563957366943359375e+02 3.696166992187500000e+00 0.000000000000000000e+00 0.000000000000000000e+00 3.240189208984375000e+03 3.750203371047973633e+00 1.000000000000000000e+00 7.738627319335937500e+02 -1.047500000000000000e+02 4.775000000000000000e+01
5.000000000000000000e+00 3.695846153846152902e+02 1.633634948730468750e+02 3.439025878906250000e+00 0.000000000000000000e+00 0.000000000000000000e+00 3.205199462890625000e+03 3.736994743347167969e+00 1.000000000000000000e+00 6.843261108398437500e+02 -1.042500000000000000e+02 4.775000000000000000e+01
5.000000000000000000e+00 3.802999999999997840e+02 1.711610107421875000e+02 3.181915283203125000e+00 0.000000000000000000e+00 0.000000000000000000e+00 3.170209960937500000e+03 3.753937721252441406e+00 1.000000000000000000e+00 6.747360839843750000e+02 -1.037500000000000000e+02 4.775000000000000000e+01
6.000000000000000000e+00 3.896384615384614563e+02 1.796125335693359375e+02 2.924774169921875000e+00 0.000000000000000000e+00 0.000000000000000000e+00 3.135220214843750000e+03 3.716789722442626953e+00 1.000000000000000000e+00 6.531287231445312500e+02 -1.032500000000000000e+02 4.775000000000000000e+01
7.000000000000000000e+00 3.850692307692307281e+02 1.732830810546875000e+02 2.815917968750000000e+00 0.000000000000000000e+00 0.000000000000000000e+00 3.122944580078125000e+03 3.689565896987915039e+00 1.000000000000000000e+00 6.831187744140625000e+02 -1.027500000000000000e+02 4.775000000000000000e+01
1.800000000000000000e+01 1.024084615384615290e+03 4.954282836914062500e+02 5.009399414062500000e+00 0.000000000000000000e+00 0.000000000000000000e+00 2.736513916015625000e+03 2.621299982070922852e+00 1.000000000000000000e+00 1.225346069335937500e+02 -1.222500000000000000e+02 4.825000000000000000e+01
5.600000000000000000e+01 1.607138461538462252e+03 6.465300292968750000e+02 4.537994384765625000e+00 0.000000000000000000e+00 0.000000000000000000e+00 2.642013671875000000e+03 2.287902832031250000e+00 4.000000000000000000e+00 6.917072143554687500e+02 -1.217500000000000000e+02 4.825000000000000000e+01
6.600000000000000000e+01 1.434707692307692696e+03 6.632219848632812500e+02 4.288024902343750000e+00 0.000000000000000000e+00 0.000000000000000000e+00 2.622869628906250000e+03 1.902901887893676758e+00 4.000000000000000000e+00 1.260719970703125000e+03 -1.212500000000000000e+02 4.825000000000000000e+01
6.100000000000000000e+01 1.039415384615384937e+03 5.912322387695312500e+02 4.038055419921875000e+00 0.000000000000000000e+00 2.941176593303680420e-01 2.603725830078125000e+03 1.828472733497619629e+00 4.000000000000000000e+00 1.930480346679687500e+03 -1.207500000000000000e+02 4.825000000000000000e+01
1.300000000000000000e+01 6.168769230769232763e+02 4.128119812011718750e+02 3.788085937500000000e+00 0.000000000000000000e+00 2.352941185235977173e-01 2.584581787109375000e+03 2.483485221862792969e+00 1.000000000000000000e+00 1.366701171875000000e+03 -1.202500000000000000e+02 4.825000000000000000e+01
1.100000000000000000e+01 3.000538461538460524e+02 2.391500244140625000e+02 3.530975341796875000e+00 0.000000000000000000e+00 9.411764740943908691e-01 2.553158935546875000e+03 3.645439386367797852e+00 1.000000000000000000e+00 4.464180297851562500e+02 -1.197500000000000000e+02 4.825000000000000000e+01
2.000000000000000000e+01 3.318461538461536406e+02 2.291722869873046875e+02 3.266693115234375000e+00 0.000000000000000000e+00 1.000000000000000000e+00 2.509457275390625000e+03 2.979017019271850586e+00 3.000000000000000000e+00 7.884856567382812500e+02 -1.192500000000000000e+02 4.825000000000000000e+01
3.500000000000000000e+01 4.192307692307693969e+02 2.481095428466796875e+02 3.002441406250000000e+00 0.000000000000000000e+00 0.000000000000000000e+00 2.465755615234375000e+03 2.379145383834838867e+00 3.000000000000000000e+00 8.529577636718750000e+02 -1.187500000000000000e+02 4.825000000000000000e+01
9.000000000000000000e+00 5.156692307692305803e+02 2.855602722167968750e+02 2.738189697265625000e+00 0.000000000000000000e+00 5.294117927551269531e-01 2.422053955078125000e+03 2.796204566955566406e+00 1.000000000000000000e+00 6.472263183593750000e+02 -1.182500000000000000e+02 4.825000000000000000e+01
1.000000000000000000e+01 6.236230769230767237e+02 3.619960632324218750e+02 2.394531250000000000e+00 0.000000000000000000e+00 0.000000000000000000e+00 2.369166748046875000e+03 2.251188993453979492e+00 1.000000000000000000e+00 5.493026733398437500e+02 -1.177500000000000000e+02 4.825000000000000000e+01
1.400000000000000000e+01 8.005923076923077133e+02 4.718504943847656250e+02 2.024444580078125000e+00 0.000000000000000000e+00 2.941176593303680420e-01 2.313218017578125000e+03 2.178493976593017578e+00 1.000000000000000000e+00 6.505344848632812500e+02 -1.172500000000000000e+02 4.825000000000000000e+01
4.600000000000000000e+01 8.792384615384615927e+02 5.475258789062500000e+02 1.654357910156250000e+00 0.000000000000000000e+00 5.882352963089942932e-02 2.257269042968750000e+03 2.143380880355834961e+00 4.000000000000000000e+00 8.104053344726562500e+02 -1.167500000000000000e+02 4.825000000000000000e+01
2.900000000000000000e+01 8.326153846153846416e+02 6.143392944335937500e+02 1.284271240234375000e+00 0.000000000000000000e+00 0.000000000000000000e+00 2.201320312500000000e+03 2.108018636703491211e+00 3.000000000000000000e+00 1.347689941406250000e+03 -1.162500000000000000e+02 4.825000000000000000e+01
3.200000000000000000e+01 7.277615384615384073e+02 5.788700561523437500e+02 1.171508789062500000e+00 0.000000000000000000e+00 5.882352963089942932e-02 2.192791503906250000e+03 2.074545383453369141e+00 3.000000000000000000e+00 1.690481811523437500e+03 -1.157500000000000000e+02 4.825000000000000000e+01
3.000000000000000000e+01 5.629538461538460297e+02 4.147561645507812500e+02 1.058746337890625000e+00 0.000000000000000000e+00 5.882352963089942932e-02 2.184262939453125000e+03 2.082011699676513672e+00 3.000000000000000000e+00 9.819221801757812500e+02 -1.152500000000000000e+02 4.825000000000000000e+01
5.500000000000000000e+01 5.081076923076925027e+02 3.376484680175781250e+02 9.459838867187500000e-01 0.000000000000000000e+00 5.294117927551269531e-01 2.175734130859375000e+03 2.068041086196899414e+00 4.000000000000000000e+00 1.597120727539062500e+03 -1.147500000000000000e+02 4.825000000000000000e+01
3.900000000000000000e+01 4.661999999999998749e+02 3.739938659667968750e+02 9.096069335937500000e-01 0.000000000000000000e+00 5.294117927551269531e-01 2.184183837890625000e+03 2.049159288406372070e+00 3.000000000000000000e+00 8.956428222656250000e+02 -1.142500000000000000e+02 4.825000000000000000e+01
6.000000000000000000e+00 5.179615384615383391e+02 5.612882690429687500e+02 1.102416992187500000e+00 0.000000000000000000e+00 7.058823704719543457e-01 2.243568115234375000e+03 1.881184577941894531e+00 1.000000000000000000e+00 1.706566162109375000e+03 -1.137500000000000000e+02 4.825000000000000000e+01
6.300000000000000000e+01 4.495999999999997954e+02 5.585682983398437500e+02 1.295227050781250000e+00 9.999999776482582092e-03 8.235294222831726074e-01 2.302952392578125000e+03 1.910676002502441406e+00 4.000000000000000000e+00 1.936269287109375000e+03 -1.132500000000000000e+02 4.825000000000000000e+01
1.500000000000000000e+01 3.659076923076922299e+02 3.851754455566406250e+02 1.488037109375000000e+00 0.000000000000000000e+00 0.000000000000000000e+00 2.362336669921875000e+03 3.134416580200195312e+00 1.000000000000000000e+00 1.367952514648437500e+03 -1.127500000000000000e+02 4.825000000000000000e+01
0.000000000000000000e+00 3.066769230769230035e+02 1.458037872314453125e+02 2.221710205078125000e+00 0.000000000000000000e+00 3.529411852359771729e-01 2.565138427734375000e+03 3.331521749496459961e+00 1.000000000000000000e+00 1.053211303710937500e+03 -1.117500000000000000e+02 4.825000000000000000e+01
0.000000000000000000e+00 3.357153846153846075e+02 1.346213836669921875e+02 2.646575927734375000e+00 0.000000000000000000e+00 2.941176593303680420e-01 2.680544677734375000e+03 1.967495083808898926e+00 1.000000000000000000e+00 9.306052856445312500e+02 -1.112500000000000000e+02 4.825000000000000000e+01
0.000000000000000000e+00 3.484384615384614108e+02 1.292025299072265625e+02 3.071411132812500000e+00 0.000000000000000000e+00 0.000000000000000000e+00 2.795950927734375000e+03 1.966726064682006836e+00 1.000000000000000000e+00 8.951588745117187500e+02 -1.107500000000000000e+02 4.825000000000000000e+01
4.000000000000000000e+00 3.410692307692306713e+02 1.558511810302734375e+02 3.425628662109375000e+00 0.000000000000000000e+00 2.941176593303680420e-01 2.899545898437500000e+03 2.440476894378662109e+00 1.000000000000000000e+00 8.529976806640625000e+02 -1.102500000000000000e+02 4.825000000000000000e+01
8.000000000000000000e+00 3.475999999999999659e+02 2.163930053710937500e+02 3.756286621093750000e+00 0.000000000000000000e+00 1.176470592617988586e-01 2.999203369140625000e+03 3.103976964950561523e+00 1.000000000000000000e+00 1.227140380859375000e+03 -1.097500000000000000e+02 4.825000000000000000e+01
6.000000000000000000e+00 3.705153846153847894e+02 2.271307830810546875e+02 4.086944580078125000e+00 0.000000000000000000e+00 0.000000000000000000e+00 3.098861083984375000e+03 3.544843912124633789e+00 1.000000000000000000e+00 1.203677246093750000e+03 -1.092500000000000000e+02 4.825000000000000000e+01
6.000000000000000000e+00 3.492923076923077588e+02 1.773542633056640625e+02 4.417602539062500000e+00 0.000000000000000000e+00 7.647058963775634766e-01 3.198518554687500000e+03 3.652403593063354492e+00 1.000000000000000000e+00 8.604135131835937500e+02 -1.087500000000000000e+02 4.825000000000000000e+01
5.000000000000000000e+00 3.250384615384615472e+02 1.647046661376953125e+02 4.413482666015625000e+00 0.000000000000000000e+00 5.882352963089942932e-02 3.226780761718750000e+03 3.712234020233154297e+00 1.000000000000000000e+00 7.793036499023437500e+02 -1.082500000000000000e+02 4.825000000000000000e+01
5.000000000000000000e+00 3.047615384615384073e+02 1.539487609863281250e+02 4.409362792968750000e+00 0.000000000000000000e+00 2.941176593303680420e-01 3.255042968750000000e+03 3.734995365142822266e+00 1.000000000000000000e+00 8.111450195312500000e+02 -1.077500000000000000e+02 4.825000000000000000e+01
5.000000000000000000e+00 3.143384615384615017e+02 1.559536895751953125e+02 4.405212402343750000e+00 0.000000000000000000e+00 2.941176593303680420e-01 3.283305175781250000e+03 2.000949621200561523e+00 1.000000000000000000e+00 7.222207031250000000e+02 -1.072500000000000000e+02 4.825000000000000000e+01
4.000000000000000000e+00 3.455923076923075996e+02 1.425945281982421875e+02 4.059631347656250000e+00 0.000000000000000000e+00 5.882353186607360840e-01 3.259491455078125000e+03 2.636134147644042969e+00 1.000000000000000000e+00 7.961530761718750000e+02 -1.062500000000000000e+02 4.825000000000000000e+01
6.000000000000000000e+00 3.668307692307693060e+02 1.377077178955078125e+02 3.785614013671875000e+00 0.000000000000000000e+00 0.000000000000000000e+00 3.223483398437500000e+03 3.604937553405761719e+00 1.000000000000000000e+00 7.447650146484375000e+02 -1.057500000000000000e+02 4.825000000000000000e+01
1.000000000000000000e+00 3.728615384615385437e+02 1.421646423339843750e+02 3.511627197265625000e+00 0.000000000000000000e+00 7.058823704719543457e-01 3.187475097656250000e+03 3.695061206817626953e+00 1.000000000000000000e+00 7.066214599609375000e+02 -1.052500000000000000e+02 4.825000000000000000e+01
6.000000000000000000e+00 3.708999999999999204e+02 1.572142639160156250e+02 3.239257812500000000e+00 0.000000000000000000e+00 0.000000000000000000e+00 3.150649414062500000e+03 3.704357385635375977e+00 1.000000000000000000e+00 6.042296752929687500e+02 -1.047500000000000000e+02 4.825000000000000000e+01
5.000000000000000000e+00 3.711615384615382709e+02 1.715003662109375000e+02 2.968536376953125000e+00 0.000000000000000000e+00 5.294117927551269531e-01 3.113006103515625000e+03 3.695164203643798828e+00 1.000000000000000000e+00 6.855831909179687500e+02 -1.042500000000000000e+02 4.825000000000000000e+01
1.000000000000000000e+00 3.791692307692307509e+02 1.780281677246093750e+02 2.697814941406250000e+00 0.000000000000000000e+00 2.941176593303680420e-01 3.075362792968750000e+03 3.705839633941650391e+00 1.000000000000000000e+00 6.834567871093750000e+02 -1.037500000000000000e+02 4.825000000000000000e+01
7.000000000000000000e+00 3.940615384615384755e+02 1.871454620361328125e+02 2.327636718750000000e+00 0.000000000000000000e+00 0.000000000000000000e+00 3.026649169921875000e+03 3.637906312942504883e+00 1.000000000000000000e+00 6.682427368164062500e+02 -1.027500000000000000e+02 4.825000000000000000e+01
9.000000000000000000e+00 5.808153846153846871e+02 2.284744873046875000e+02 2.387847900390625000e+00 0.000000000000000000e+00 0.000000000000000000e+00 3.051576660156250000e+03 3.622640132904052734e+00 1.000000000000000000e+00 4.664484252929687500e+02 -1.002500000000000000e+02 4.825000000000000000e+01
7.300000000000000000e+01 2.386946153846154175e+03 5.091925659179687500e+02 6.222991943359375000e+00 0.000000000000000000e+00 0.000000000000000000e+00 2.877277832031250000e+03 2.392634868621826172e+00 4.000000000000000000e+00 6.748864746093750000e+02 -1.242500000000000000e+02 4.875000000000000000e+01
6.300000000000000000e+01 1.501699999999999591e+03 4.537833251953125000e+02 5.492340087890625000e+00 0.000000000000000000e+00 0.000000000000000000e+00 2.745518066406250000e+03 2.494972229003906250e+00 4.000000000000000000e+00 9.346152496337890625e+01 -1.237500000000000000e+02 4.875000000000000000e+01
3.700000000000000000e+01 1.373669230769230808e+03 5.786579589843750000e+02 4.078796386718750000e+00 0.000000000000000000e+00 0.000000000000000000e+00 2.488346679687500000e+03 2.460196733474731445e+00 3.000000000000000000e+00 3.786283569335937500e+02 -1.222500000000000000e+02 4.875000000000000000e+01
5.400000000000000000e+01 1.704453846153846825e+03 6.518605346679687500e+02 3.658996582031250000e+00 0.000000000000000000e+00 0.000000000000000000e+00 2.419837890625000000e+03 2.071027517318725586e+00 4.000000000000000000e+00 1.167385131835937500e+03 -1.217500000000000000e+02 4.875000000000000000e+01
5.900000000000000000e+01 1.423561538461539158e+03 6.472657470703125000e+02 3.393371582031250000e+00 0.000000000000000000e+00 0.000000000000000000e+00 2.402973632812500000e+03 1.781570911407470703e+00 4.000000000000000000e+00 1.523854614257812500e+03 -1.212500000000000000e+02 4.875000000000000000e+01
1.400000000000000000e+01 1.057884615384615472e+03 5.897041015625000000e+02 3.127746582031250000e+00 9.999999776482582092e-03 5.882352963089942932e-02 2.386109130859375000e+03 1.671416401863098145e+00 1.000000000000000000e+00 1.443607055664062500e+03 -1.207500000000000000e+02 4.875000000000000000e+01
3.000000000000000000e+00 7.511000000000005912e+02 4.398077392578125000e+02 2.862091064453125000e+00 9.999999776482582092e-03 1.176470637321472168e+00 2.369244873046875000e+03 1.758455514907836914e+00 1.000000000000000000e+00 1.883041870117187500e+03 -1.202500000000000000e+02 4.875000000000000000e+01
6.000000000000000000e+01 4.405615384615388166e+02 2.610590209960937500e+02 2.594360351562500000e+00 0.000000000000000000e+00 8.235294222831726074e-01 2.341595458984375000e+03 2.619682312011718750e+00 4.000000000000000000e+00 1.288154907226562500e+03 -1.197500000000000000e+02 4.875000000000000000e+01
5.100000000000000000e+01 3.476076923076921616e+02 2.215895996093750000e+02 2.324493408203125000e+00 0.000000000000000000e+00 5.882353186607360840e-01 2.303160888671875000e+03 2.609005689620971680e+00 4.000000000000000000e+00 1.150046020507812500e+03 -1.192500000000000000e+02 4.875000000000000000e+01
4.900000000000000000e+01 5.030000000000003411e+02 2.590060729980468750e+02 2.054626464843750000e+00 0.000000000000000000e+00 0.000000000000000000e+00 2.264726318359375000e+03 2.123017072677612305e+00 4.000000000000000000e+00 1.104523681640625000e+03 -1.187500000000000000e+02 4.875000000000000000e+01
6.900000000000000000e+01 6.607692307692312852e+02 2.777459411621093750e+02 1.784759521484375000e+00 0.000000000000000000e+00 7.647058963775634766e-01 2.226291748046875000e+03 2.129319906234741211e+00 4.000000000000000000e+00 1.156654541015625000e+03 -1.182500000000000000e+02 4.875000000000000000e+01
4.200000000000000000e+01 8.243000000000004093e+02 3.663892517089843750e+02 1.477020263671875000e+00 0.000000000000000000e+00 0.000000000000000000e+00 2.182819824218750000e+03 2.126241445541381836e+00 3.000000000000000000e+00 1.246336547851562500e+03 -1.177500000000000000e+02 4.875000000000000000e+01
6.500000000000000000e+01 9.999615384615379980e+02 5.226275024414062500e+02 1.156616210937500000e+00 0.000000000000000000e+00 0.000000000000000000e+00 2.137668701171875000e+03 2.033294677734375000e+00 4.000000000000000000e+00 1.452042724609375000e+03 -1.172500000000000000e+02 4.875000000000000000e+01
2.200000000000000000e+01 1.064515384615384164e+03 5.465998535156250000e+02 8.362426757812500000e-01 0.000000000000000000e+00 5.294117927551269531e-01 2.092517822265625000e+03 1.938321590423583984e+00 3.000000000000000000e+00 1.699368530273437500e+03 -1.167500000000000000e+02 4.875000000000000000e+01
4.600000000000000000e+01 7.849538461538460297e+02 5.226921386718750000e+02 5.158386230468750000e-01 0.000000000000000000e+00 1.117647051811218262e+00 2.047366699218750000e+03 2.000566959381103516e+00 4.000000000000000000e+00 8.384337158203125000e+02 -1.162500000000000000e+02 4.875000000000000000e+01
6.600000000000000000e+01 6.126846153846156540e+02 5.243575439453125000e+02 5.489501953125000000e-01 0.000000000000000000e+00 5.882352963089942932e-02 2.069486572265625000e+03 2.040585517883300781e+00 4.000000000000000000e+00 1.383650390625000000e+03 -1.157500000000000000e+02 4.875000000000000000e+01
4.600000000000000000e+01 5.439846153846157222e+02 4.578054199218750000e+02 5.820617675781250000e-01 0.000000000000000000e+00 1.176470592617988586e-01 2.091606445312500000e+03 2.014220952987670898e+00 4.000000000000000000e+00 1.557121215820312500e+03 -1.152500000000000000e+02 4.875000000000000000e+01
4.500000000000000000e+01 5.925615384615383618e+02 4.863578186035156250e+02 6.151428222656250000e-01 0.000000000000000000e+00 0.000000000000000000e+00 2.113726318359375000e+03 1.922215938568115234e+00 4.000000000000000000e+00 1.721737915039062500e+03 -1.147500000000000000e+02 4.875000000000000000e+01
2.800000000000000000e+01 6.407076923076926960e+02 4.652832641601562500e+02 7.115173339843750000e-01 0.000000000000000000e+00 1.176470637321472168e+00 2.149581787109375000e+03 1.805908799171447754e+00 3.000000000000000000e+00 1.177440673828125000e+03 -1.142500000000000000e+02 4.875000000000000000e+01
4.000000000000000000e+00 5.503538461538462343e+02 5.516752319335937500e+02 9.976196289062500000e-01 1.037164032459259033e-01 1.000000000000000000e+00 2.226644775390625000e+03 1.690569281578063965e+00 1.000000000000000000e+00 1.820497558593750000e+03 -1.137500000000000000e+02 4.875000000000000000e+01
6.000000000000000000e+00 3.873076923076920934e+02 3.940711975097656250e+02 1.283752441406250000e+00 0.000000000000000000e+00 7.647058963775634766e-01 2.303708007812500000e+03 2.316104412078857422e+00 1.000000000000000000e+00 1.528029541015625000e+03 -1.132500000000000000e+02 4.875000000000000000e+01
4.000000000000000000e+00 2.983615384615384301e+02 2.052739868164062500e+02 1.569885253906250000e+00 0.000000000000000000e+00 2.352941185235977173e-01 2.380770996093750000e+03 3.308897733688354492e+00 1.000000000000000000e+00 1.298169677734375000e+03 -1.127500000000000000e+02 4.875000000000000000e+01
8.000000000000000000e+00 2.631923076923077360e+02 1.227392349243164062e+02 1.932067871093750000e+00 0.000000000000000000e+00 2.352941185235977173e-01 2.479958984375000000e+03 3.468755960464477539e+00 1.000000000000000000e+00 1.211426879882812500e+03 -1.122500000000000000e+02 4.875000000000000000e+01
0.000000000000000000e+00 2.897461538461538453e+02 1.284112091064453125e+02 2.370361328125000000e+00 0.000000000000000000e+00 2.352941185235977173e-01 2.601272216796875000e+03 3.222095727920532227e+00 1.000000000000000000e+00 1.058584838867187500e+03 -1.117500000000000000e+02 4.875000000000000000e+01
1.000000000000000000e+00 3.325846153846154039e+02 1.314438018798828125e+02 2.808654785156250000e+00 0.000000000000000000e+00 0.000000000000000000e+00 2.722585449218750000e+03 2.227022171020507812e+00 1.000000000000000000e+00 1.168593872070312500e+03 -1.112500000000000000e+02 4.875000000000000000e+01
2.000000000000000000e+00 3.329153846153846530e+02 1.252124557495117188e+02 3.246917724609375000e+00 0.000000000000000000e+00 2.941176593303680420e-01 2.843898681640625000e+03 2.853993892669677734e+00 1.000000000000000000e+00 9.763755493164062500e+02 -1.107500000000000000e+02 4.875000000000000000e+01
0.000000000000000000e+00 3.172846153846154493e+02 1.349835968017578125e+02 3.557220458984375000e+00 0.000000000000000000e+00 5.294117927551269531e-01 2.940533203125000000e+03 1.911291599273681641e+00 1.000000000000000000e+00 8.416360473632812500e+02 -1.102500000000000000e+02 4.875000000000000000e+01
4.000000000000000000e+00 2.989999999999999432e+02 1.487409057617187500e+02 3.824829101562500000e+00 0.000000000000000000e+00 0.000000000000000000e+00 3.028941406250000000e+03 2.340686321258544922e+00 1.000000000000000000e+00 8.371827392578125000e+02 -1.097500000000000000e+02 4.875000000000000000e+01
3.000000000000000000e+00 3.386769230769231172e+02 1.600512695312500000e+02 4.092437744140625000e+00 0.000000000000000000e+00 0.000000000000000000e+00 3.117349853515625000e+03 3.611043930053710938e+00 1.000000000000000000e+00 7.822606811523437500e+02 -1.092500000000000000e+02 4.875000000000000000e+01
4.000000000000000000e+00 3.424384615384615245e+02 1.472906341552734375e+02 4.360046386718750000e+00 0.000000000000000000e+00 5.882353186607360840e-01 3.205758056640625000e+03 3.583749294281005859e+00 1.000000000000000000e+00 9.875421752929687500e+02 -1.087500000000000000e+02 4.875000000000000000e+01
3.000000000000000000e+00 3.110307692307691241e+02 1.376974639892578125e+02 4.274810791015625000e+00 0.000000000000000000e+00 9.411764740943908691e-01 3.216027587890625000e+03 3.600671529769897461e+00 1.000000000000000000e+00 8.658869628906250000e+02 -1.082500000000000000e+02 4.875000000000000000e+01
5.000000000000000000e+00 2.815461538461538566e+02 1.516606903076171875e+02 4.189575195312500000e+00 0.000000000000000000e+00 0.000000000000000000e+00 3.226297119140625000e+03 3.604114294052124023e+00 1.000000000000000000e+00 8.202000122070312500e+02 -1.077500000000000000e+02 4.875000000000000000e+01
3.000000000000000000e+00 2.816615384615386120e+02 1.727922515869140625e+02 4.104339599609375000e+00 0.000000000000000000e+00 0.000000000000000000e+00 3.236566650390625000e+03 3.587646007537841797e+00 1.000000000000000000e+00 7.718680419921875000e+02 -1.072500000000000000e+02 4.875000000000000000e+01
2.000000000000000000e+00 3.165307692307691241e+02 1.634359130859375000e+02 3.961883544921875000e+00 0.000000000000000000e+00 0.000000000000000000e+00 3.232805419921875000e+03 3.204023838043212891e+00 1.000000000000000000e+00 7.914791259765625000e+02 -1.067500000000000000e+02 4.875000000000000000e+01
0.000000000000000000e+00 3.544769230769230148e+02 1.559240722656250000e+02 3.647644042968750000e+00 0.000000000000000000e+00 4.117647111415863037e-01 3.186951660156250000e+03 3.517895936965942383e+00 1.000000000000000000e+00 9.127122192382812500e+02 -1.062500000000000000e+02 4.875000000000000000e+01
3.000000000000000000e+00 3.684307692307693856e+02 1.689968109130859375e+02 3.333404541015625000e+00 0.000000000000000000e+00 0.000000000000000000e+00 3.141097656250000000e+03 3.571486711502075195e+00 1.000000000000000000e+00 8.335678710937500000e+02 -1.057500000000000000e+02 4.875000000000000000e+01
7.400000000000000000e+01 2.516523076923076587e+03 5.947929077148437500e+02 6.210510253906250000e+00 0.000000000000000000e+00 0.000000000000000000e+00 2.736303466796875000e+03 2.151160955429077148e+00 4.000000000000000000e+00 5.131040649414062500e+02 -1.252500000000000000e+02 4.925000000000000000e+01
2.200000000000000000e+01 2.204084615384614608e+03 6.278273925781250000e+02 2.829895019531250000e+00 0.000000000000000000e+00 0.000000000000000000e+00 2.156440673828125000e+03 2.504439592361450195e+00 3.000000000000000000e+00 1.497533226013183594e+01 -1.227500000000000000e+02 4.925000000000000000e+01
5.500000000000000000e+01 2.097146153846153084e+03 6.271173706054687500e+02 2.515136718750000000e+00 0.000000000000000000e+00 0.000000000000000000e+00 2.140967529296875000e+03 2.397407054901123047e+00 4.000000000000000000e+00 2.465562744140625000e+02 -1.222500000000000000e+02 4.925000000000000000e+01
3.000000000000000000e+01 1.700561538461538476e+03 6.337731933593750000e+02 2.211822509765625000e+00 0.000000000000000000e+00 0.000000000000000000e+00 2.126057128906250000e+03 2.202403306961059570e+00 3.000000000000000000e+00 2.230149078369140625e+01 -1.217500000000000000e+02 4.925000000000000000e+01
6.000000000000000000e+01 1.192792307692307759e+03 6.278632202148437500e+02 1.942871093750000000e+00 0.000000000000000000e+00 0.000000000000000000e+00 2.112833984375000000e+03 1.920868277549743652e+00 4.000000000000000000e+00 1.355381713867187500e+03 -1.212500000000000000e+02 4.925000000000000000e+01
5.800000000000000000e+01 8.908692307692309669e+02 4.793365783691406250e+02 1.673919677734375000e+00 0.000000000000000000e+00 5.882352963089942932e-02 2.099610839843750000e+03 1.723192691802978516e+00 4.000000000000000000e+00 1.576401367187500000e+03 -1.207500000000000000e+02 4.925000000000000000e+01
5.900000000000000000e+01 6.787923076923077588e+02 3.102082214355468750e+02 1.404968261718750000e+00 9.999999776482582092e-03 5.882352963089942932e-02 2.086387939453125000e+03 1.732160091400146484e+00 4.000000000000000000e+00 1.724958862304687500e+03 -1.202500000000000000e+02 4.925000000000000000e+01
5.400000000000000000e+01 4.805538461538459387e+02 2.287917938232421875e+02 1.132995605468750000e+00 0.000000000000000000e+00 0.000000000000000000e+00 2.063425292968750000e+03 1.861624002456665039e+00 4.000000000000000000e+00 1.285924072265625000e+03 -1.197500000000000000e+02 4.925000000000000000e+01
5.700000000000000000e+01 5.408615384615383164e+02 2.220984802246093750e+02 8.580322265625000000e-01 0.000000000000000000e+00 5.294117927551269531e-01 2.030723754882812500e+03 1.916132688522338867e+00 4.000000000000000000e+00 1.644655395507812500e+03 -1.192500000000000000e+02 4.925000000000000000e+01
6.900000000000000000e+01 6.784000000000003183e+02 2.521509246826171875e+02 5.830993652343750000e-01 0.000000000000000000e+00 0.000000000000000000e+00 1.998021972656250000e+03 1.935051441192626953e+00 4.000000000000000000e+00 1.319899414062500000e+03 -1.187500000000000000e+02 4.925000000000000000e+01
4.800000000000000000e+01 8.647076923076921275e+02 2.406220550537109375e+02 3.081359863281250000e-01 0.000000000000000000e+00 0.000000000000000000e+00 1.965320312500000000e+03 1.955699324607849121e+00 4.000000000000000000e+00 1.235299072265625000e+03 -1.182500000000000000e+02 4.925000000000000000e+01
6.900000000000000000e+01 1.057684615384615654e+03 2.099703674316406250e+02 5.718994140625000000e-02 0.000000000000000000e+00 0.000000000000000000e+00 1.925743041992187500e+03 1.949599981307983398e+00 4.000000000000000000e+00 1.254394653320312500e+03 -1.177500000000000000e+02 4.925000000000000000e+01
7.500000000000000000e+01 1.158807692307691923e+03 3.573743286132812500e+02 -1.857299804687500000e-01 0.000000000000000000e+00 0.000000000000000000e+00 1.883874023437500000e+03 1.893910884857177734e+00 4.000000000000000000e+00 1.077968872070312500e+03 -1.172500000000000000e+02 4.925000000000000000e+01
7.300000000000000000e+01 1.163338461538461161e+03 4.133062133789062500e+02 -4.286499023437500000e-01 0.000000000000000000e+00 2.352941185235977173e-01 1.842004882812500000e+03 1.792010068893432617e+00 4.000000000000000000e+00 1.245673461914062500e+03 -1.167500000000000000e+02 4.925000000000000000e+01
4.600000000000000000e+01 8.708769230769224805e+02 3.836186218261718750e+02 -6.715698242187500000e-01 0.000000000000000000e+00 2.352941185235977173e-01 1.800135864257812500e+03 1.824011921882629395e+00 4.000000000000000000e+00 1.715379272460937500e+03 -1.162500000000000000e+02 4.925000000000000000e+01
5.100000000000000000e+01 5.903769230769229353e+02 4.612875671386718750e+02 -4.666748046875000000e-01 0.000000000000000000e+00 4.705882370471954346e-01 1.860409545898437500e+03 1.960814237594604492e+00 4.000000000000000000e+00 1.631804687500000000e+03 -1.157500000000000000e+02 4.925000000000000000e+01
4.300000000000000000e+01 6.116615384615387256e+02 4.903478698730468750e+02 -2.617797851562500000e-01 0.000000000000000000e+00 4.705882370471954346e-01 1.920683227539062500e+03 1.991820931434631348e+00 3.000000000000000000e+00 7.784222412109375000e+02 -1.152500000000000000e+02 4.925000000000000000e+01
5.500000000000000000e+01 6.621307692307693742e+02 5.624672241210937500e+02 -5.688476562500000000e-02 9.999999776482582092e-03 2.352941185235977173e-01 1.980956909179687500e+03 1.830621242523193359e+00 4.000000000000000000e+00 1.867376831054687500e+03 -1.147500000000000000e+02 4.925000000000000000e+01
4.000000000000000000e+01 6.635999999999999091e+02 4.905943298339843750e+02 1.897583007812500000e-01 0.000000000000000000e+00 5.882353186607360840e-01 2.050075927734375000e+03 2.126776456832885742e+00 3.000000000000000000e+00 1.806257812500000000e+03 -1.142500000000000000e+02 4.925000000000000000e+01
6.000000000000000000e+00 4.193153846153845734e+02 2.639287719726562500e+02 9.336242675781250000e-01 0.000000000000000000e+00 0.000000000000000000e+00 2.241386718750000000e+03 3.158167362213134766e+00 1.000000000000000000e+00 1.122803833007812500e+03 -1.132500000000000000e+02 4.925000000000000000e+01
1.400000000000000000e+01 3.328846153846152447e+02 1.906021270751953125e+02 1.305572509765625000e+00 0.000000000000000000e+00 0.000000000000000000e+00 2.337041992187500000e+03 2.544607639312744141e+00 1.000000000000000000e+00 1.249766235351562500e+03 -1.127500000000000000e+02 4.925000000000000000e+01
5.000000000000000000e+00 2.924230769230769056e+02 1.597720031738281250e+02 1.708953857421875000e+00 0.000000000000000000e+00 0.000000000000000000e+00 2.445398193359375000e+03 3.496264934539794922e+00 1.000000000000000000e+00 1.045463989257812500e+03 -1.122500000000000000e+02 4.925000000000000000e+01
0.000000000000000000e+00 2.812153846153846644e+02 1.537418212890625000e+02 2.143859863281250000e+00 0.000000000000000000e+00 1.058823585510253906e+00 2.566455566406250000e+03 3.581105947494506836e+00 1.000000000000000000e+00 9.253961181640625000e+02 -1.117500000000000000e+02 4.925000000000000000e+01
1.000000000000000000e+00 3.186999999999998181e+02 1.517588806152343750e+02 2.578735351562500000e+00 0.000000000000000000e+00 1.235294103622436523e+00 2.687512939453125000e+03 3.624828577041625977e+00 1.000000000000000000e+00 9.303930053710937500e+02 -1.112500000000000000e+02 4.925000000000000000e+01
5.000000000000000000e+00 3.248076923076923208e+02 1.425141754150390625e+02 3.013610839843750000e+00 0.000000000000000000e+00 2.352941185235977173e-01 2.808570312500000000e+03 3.587942600250244141e+00 1.000000000000000000e+00 8.799439697265625000e+02 -1.107500000000000000e+02 4.925000000000000000e+01
4.000000000000000000e+00 3.142384615384615927e+02 1.528847503662109375e+02 3.282257080078125000e+00 0.000000000000000000e+00 0.000000000000000000e+00 2.896389160156250000e+03 3.480559825897216797e+00 1.000000000000000000e+00 9.763619384765625000e+02 -1.102500000000000000e+02 4.925000000000000000e+01
1.000000000000000000e+00 3.169846153846154948e+02 1.870537567138671875e+02 3.495483398437500000e+00 0.000000000000000000e+00 0.000000000000000000e+00 2.973128173828125000e+03 3.441937208175659180e+00 1.000000000000000000e+00 9.729649658203125000e+02 -1.097500000000000000e+02 4.925000000000000000e+01
4.000000000000000000e+00 3.480153846153846757e+02 1.795344696044921875e+02 3.708679199218750000e+00 0.000000000000000000e+00 0.000000000000000000e+00 3.049867431640625000e+03 3.420085430145263672e+00 1.000000000000000000e+00 9.762777709960937500e+02 -1.092500000000000000e+02 4.925000000000000000e+01
4.000000000000000000e+00 3.562615384615383505e+02 1.488857727050781250e+02 3.921905517578125000e+00 0.000000000000000000e+00 3.529411852359771729e-01 3.126606689453125000e+03 3.439935445785522461e+00 1.000000000000000000e+00 9.189846801757812500e+02 -1.087500000000000000e+02 4.925000000000000000e+01
2.000000000000000000e+00 3.204230769230769056e+02 1.472461395263671875e+02 3.791625976562500000e+00 0.000000000000000000e+00 5.882352963089942932e-02 3.128061279296875000e+03 3.463482856750488281e+00 1.000000000000000000e+00 9.479498901367187500e+02 -1.082500000000000000e+02 4.925000000000000000e+01
7.000000000000000000e+00 2.830692307692306713e+02 1.681241607666015625e+02 3.661315917968750000e+00 0.000000000000000000e+00 0.000000000000000000e+00 3.129515869140625000e+03 3.463948726654052734e+00 1.000000000000000000e+00 8.009554443359375000e+02 -1.077500000000000000e+02 4.925000000000000000e+01
6.000000000000000000e+00 2.997615384615385210e+02 2.029603271484375000e+02 3.531036376953125000e+00 0.000000000000000000e+00 0.000000000000000000e+00 3.130970703125000000e+03 3.438523530960083008e+00 1.000000000000000000e+00 9.338153686523437500e+02 -1.072500000000000000e+02 4.925000000000000000e+01
2.000000000000000000e+01 3.333307692307693060e+02 1.858491363525390625e+02 3.353637695312500000e+00 0.000000000000000000e+00 0.000000000000000000e+00 3.120537353515625000e+03 2.690616607666015625e+00 3.000000000000000000e+00 9.353649902343750000e+02 -1.067500000000000000e+02 4.925000000000000000e+01
5.000000000000000000e+00 3.594999999999999432e+02 1.806683197021484375e+02 3.034881591796875000e+00 0.000000000000000000e+00 0.000000000000000000e+00 3.074440673828125000e+03 3.483067035675048828e+00 1.000000000000000000e+00 9.630839843750000000e+02 -1.062500000000000000e+02 4.925000000000000000e+01
1.000000000000000000e+00 3.770461538461537430e+02 1.949505615234375000e+02 2.716156005859375000e+00 0.000000000000000000e+00 0.000000000000000000e+00 3.028343750000000000e+03 3.512626647949218750e+00 1.000000000000000000e+00 8.517586669921875000e+02 -1.057500000000000000e+02 4.925000000000000000e+01
5.000000000000000000e+00 3.857307692307689422e+02 2.350940856933593750e+02 2.397399902343750000e+00 0.000000000000000000e+00 0.000000000000000000e+00 2.982246826171875000e+03 3.501927375793457031e+00 1.000000000000000000e+00 7.306081542968750000e+02 -1.052500000000000000e+02 4.925000000000000000e+01
3.200000000000000000e+01 2.942007692307689922e+03 6.673110351562500000e+02 6.458679199218750000e+00 0.000000000000000000e+00 0.000000000000000000e+00 2.722488525390625000e+03 2.170758008956909180e+00 3.000000000000000000e+00 5.942215576171875000e+02 -1.262500000000000000e+02 4.975000000000000000e+01
5.000000000000000000e+01 2.559846153846153811e+03 6.338645019531250000e+02 5.743194580078125000e+00 0.000000000000000000e+00 0.000000000000000000e+00 2.550456054687500000e+03 2.007924556732177734e+00 4.000000000000000000e+00 1.009400939941406250e+03 -1.257500000000000000e+02 4.975000000000000000e+01
6.400000000000000000e+01 2.239315384615384119e+03 6.496173095703125000e+02 1.268157958984375000e+00 0.000000000000000000e+00 2.352941185235977173e-01 1.684032836914062500e+03 1.996050596237182617e+00 4.000000000000000000e+00 1.203685058593750000e+03 -1.232500000000000000e+02 4.975000000000000000e+01
6.900000000000000000e+01 2.013330769230769420e+03 6.548679809570312500e+02 1.109802246093750000e+00 0.000000000000000000e+00 0.000000000000000000e+00 1.738810668945312500e+03 1.875937461853027344e+00 4.000000000000000000e+00 8.625964355468750000e+02 -1.227500000000000000e+02 4.975000000000000000e+01
6.000000000000000000e+01 1.742376923076922822e+03 6.325602416992187500e+02 9.514770507812500000e-01 0.000000000000000000e+00 0.000000000000000000e+00 1.793588500976562500e+03 1.975916266441345215e+00 4.000000000000000000e+00 5.285336914062500000e+02 -1.222500000000000000e+02 4.975000000000000000e+01
5.400000000000000000e+01 1.265061538461539158e+03 6.025198974609375000e+02 7.646789550781250000e-01 0.000000000000000000e+00 0.000000000000000000e+00 1.832276367187500000e+03 2.001744747161865234e+00 4.000000000000000000e+00 1.455017333984375000e+03 -1.217500000000000000e+02 4.975000000000000000e+01
5.300000000000000000e+01 8.490230769230770420e+02 5.791218261718750000e+02 4.923706054687500000e-01 0.000000000000000000e+00 5.294117927551269531e-01 1.822694580078125000e+03 1.963298082351684570e+00 4.000000000000000000e+00 1.258062011718750000e+03 -1.212500000000000000e+02 4.975000000000000000e+01
5.100000000000000000e+01 5.830384615384614335e+02 3.827098083496093750e+02 2.200927734375000000e-01 0.000000000000000000e+00 5.882353186607360840e-01 1.813112670898437500e+03 1.880426645278930664e+00 4.000000000000000000e+00 1.096753784179687500e+03 -1.207500000000000000e+02 4.975000000000000000e+01
2.000000000000000000e+01 5.755461538461538566e+02 1.712902526855468750e+02 -5.218505859375000000e-02 0.000000000000000000e+00 0.000000000000000000e+00 1.803530761718750000e+03 1.849175333976745605e+00 3.000000000000000000e+00 1.386848754882812500e+03 -1.202500000000000000e+02 4.975000000000000000e+01
5.300000000000000000e+01 6.648769230769228216e+02 2.196096038818359375e+02 -6.083984375000000000e-01 0.000000000000000000e+00 7.647058963775634766e-01 1.758286499023437500e+03 1.858331799507141113e+00 4.000000000000000000e+00 1.409815551757812500e+03 -1.192500000000000000e+02 4.975000000000000000e+01
4.000000000000000000e+01 8.916307692307696016e+02 2.893160095214843750e+02 -8.884582519531250000e-01 0.000000000000000000e+00 5.294117927551269531e-01 1.731317749023437500e+03 1.796970009803771973e+00 3.000000000000000000e+00 1.217687500000000000e+03 -1.187500000000000000e+02 4.975000000000000000e+01
4.800000000000000000e+01 1.072330769230769647e+03 3.238866577148437500e+02 -1.168487548828125000e+00 0.000000000000000000e+00 0.000000000000000000e+00 1.704348876953125000e+03 1.786870121955871582e+00 4.000000000000000000e+00 1.310779541015625000e+03 -1.182500000000000000e+02 4.975000000000000000e+01
8.000000000000000000e+00 1.248592307692307713e+03 2.924648742675781250e+02 -1.362609863281250000e+00 1.353950351476669312e-01 2.352941185235977173e-01 1.668666259765625000e+03 1.773384690284729004e+00 1.000000000000000000e+00 1.635295776367187500e+03 -1.177500000000000000e+02 4.975000000000000000e+01
7.000000000000000000e+00 1.244538461538461434e+03 3.373269042968750000e+02 -1.528045654296875000e+00 9.999999776482582092e-03 5.294117927551269531e-01 1.630079223632812500e+03 1.726416230201721191e+00 1.000000000000000000e+00 1.939585571289062500e+03 -1.172500000000000000e+02 4.975000000000000000e+01
1.600000000000000000e+01 1.213769230769230717e+03 3.495812072753906250e+02 -1.693511962890625000e+00 1.515055745840072632e-01 0.000000000000000000e+00 1.591492187500000000e+03 1.583306789398193359e+00 1.000000000000000000e+00 1.848745849609375000e+03 -1.167500000000000000e+02 4.975000000000000000e+01
1.900000000000000000e+01 5.814692307692307622e+02 2.438807830810546875e+02 -1.482269287109375000e+00 0.000000000000000000e+00 2.352941185235977173e-01 1.651332519531250000e+03 1.825410604476928711e+00 1.000000000000000000e+00 8.267398071289062500e+02 -1.157500000000000000e+02 4.975000000000000000e+01
4.800000000000000000e+01 7.085615384615383618e+02 3.125763854980468750e+02 -1.105590820312500000e+00 0.000000000000000000e+00 0.000000000000000000e+00 1.749760131835937500e+03 1.686872363090515137e+00 4.000000000000000000e+00 1.682000000000000000e+03 -1.152500000000000000e+02 4.975000000000000000e+01
5.700000000000000000e+01 6.192307692307691696e+02 3.693641357421875000e+02 -7.289123535156250000e-01 9.999999776482582092e-03 4.705882370471954346e-01 1.848187622070312500e+03 1.695163369178771973e+00 4.000000000000000000e+00 1.624541015625000000e+03 -1.147500000000000000e+02 4.975000000000000000e+01
5.000000000000000000e+00 5.549769230769228443e+02 3.109126586914062500e+02 -3.319702148437500000e-01 0.000000000000000000e+00 0.000000000000000000e+00 1.950570190429687500e+03 1.748887896537780762e+00 1.000000000000000000e+00 1.507592773437500000e+03 -1.142500000000000000e+02 4.975000000000000000e+01
8.000000000000000000e+00 4.150615384615387029e+02 2.784004821777343750e+02 1.257629394531250000e-01 0.000000000000000000e+00 2.352941185235977173e-01 2.064817871093750000e+03 8.563712835311889648e-01 1.000000000000000000e+00 1.302974975585937500e+03 -1.137500000000000000e+02 4.975000000000000000e+01
4.000000000000000000e+00 3.538461538461539817e+02 2.177450714111328125e+02 5.834960937500000000e-01 0.000000000000000000e+00 6.470588445663452148e-01 2.179065429687500000e+03 1.664642095565795898e+00 1.000000000000000000e+00 9.436068725585937500e+02 -1.132500000000000000e+02 4.975000000000000000e+01
4.000000000000000000e+00 2.984692307692307054e+02 1.621709136962890625e+02 1.485839843750000000e+00 0.000000000000000000e+00 2.941176593303680420e-01 2.410837402343750000e+03 3.593159675598144531e+00 1.000000000000000000e+00 8.275535278320312500e+02 -1.122500000000000000e+02 4.975000000000000000e+01
6.000000000000000000e+00 2.866769230769228329e+02 1.410528717041015625e+02 1.917327880859375000e+00 0.000000000000000000e+00 8.823529481887817383e-01 2.531638916015625000e+03 3.633001804351806641e+00 1.000000000000000000e+00 8.178747558593750000e+02 -1.117500000000000000e+02 4.975000000000000000e+01
0.000000000000000000e+00 3.018230769230768260e+02 1.297839355468750000e+02 2.348815917968750000e+00 0.000000000000000000e+00 1.352941155433654785e+00 2.652440429687500000e+03 3.647546052932739258e+00 1.000000000000000000e+00 8.438831176757812500e+02 -1.112500000000000000e+02 4.975000000000000000e+01
5.000000000000000000e+00 3.116923076923076792e+02 1.367976989746093750e+02 2.780273437500000000e+00 0.000000000000000000e+00 5.882353186607360840e-01 2.773241943359375000e+03 3.564477920532226562e+00 1.000000000000000000e+00 9.314620361328125000e+02 -1.107500000000000000e+02 4.975000000000000000e+01
3.000000000000000000e+00 3.271846153846154266e+02 1.733813323974609375e+02 3.007293701171875000e+00 0.000000000000000000e+00 2.941176593303680420e-01 2.852244873046875000e+03 3.424832582473754883e+00 1.000000000000000000e+00 1.084347900390625000e+03 -1.102500000000000000e+02 4.975000000000000000e+01
6.000000000000000000e+00 3.508384615384616723e+02 2.418074493408203125e+02 3.166107177734375000e+00 0.000000000000000000e+00 7.647058963775634766e-01 2.917314941406250000e+03 3.369944810867309570e+00 1.000000000000000000e+00 9.389586181640625000e+02 -1.097500000000000000e+02 4.975000000000000000e+01
3.100000000000000000e+01 3.941923076923076223e+02 2.399784393310546875e+02 3.324951171875000000e+00 0.000000000000000000e+00 0.000000000000000000e+00 2.982385009765625000e+03 3.334865331649780273e+00 3.000000000000000000e+00 1.149253417968750000e+03 -1.092500000000000000e+02 4.975000000000000000e+01
3.000000000000000000e+00 3.973230769230768828e+02 1.776972351074218750e+02 3.483795166015625000e+00 0.000000000000000000e+00 2.352941185235977173e-01 3.047455078125000000e+03 3.339566230773925781e+00 1.000000000000000000e+00 1.056739746093750000e+03 -1.087500000000000000e+02 4.975000000000000000e+01
0.000000000000000000e+00 3.530384615384616609e+02 1.554290924072265625e+02 3.308441162109375000e+00 0.000000000000000000e+00 0.000000000000000000e+00 3.040094970703125000e+03 3.380276679992675781e+00 1.000000000000000000e+00 9.110614624023437500e+02 -1.082500000000000000e+02 4.975000000000000000e+01
4.000000000000000000e+00 3.001846153846154834e+02 1.657213134765625000e+02 3.133087158203125000e+00 0.000000000000000000e+00 0.000000000000000000e+00 3.032734863281250000e+03 3.434383869171142578e+00 1.000000000000000000e+00 7.974722900390625000e+02 -1.077500000000000000e+02 4.975000000000000000e+01
1.000000000000000000e+00 3.431307692307691468e+02 1.892990722656250000e+02 2.745391845703125000e+00 0.000000000000000000e+00 0.000000000000000000e+00 3.008269531250000000e+03 3.503910541534423828e+00 1.000000000000000000e+00 7.530905761718750000e+02 -1.067500000000000000e+02 4.975000000000000000e+01
1.000000000000000000e+00 3.610769230769229239e+02 1.895960845947265625e+02 2.098876953125000000e+00 0.000000000000000000e+00 0.000000000000000000e+00 2.915589843750000000e+03 3.494707345962524414e+00 1.000000000000000000e+00 6.831687011718750000e+02 -1.057500000000000000e+02 4.975000000000000000e+01
4.000000000000000000e+01 4.574692307692309896e+02 2.271932830810546875e+02 8.385009765625000000e-01 0.000000000000000000e+00 0.000000000000000000e+00 2.745104980468750000e+03 3.424227237701416016e+00 3.000000000000000000e+00 7.370426635742187500e+02 -1.022500000000000000e+02 4.975000000000000000e+01
7.300000000000000000e+01 2.870369230769229489e+03 6.148876342773437500e+02 6.150512695312500000e+00 0.000000000000000000e+00 0.000000000000000000e+00 2.578260253906250000e+03 2.173938989639282227e+00 4.000000000000000000e+00 2.432498931884765625e+02 -1.267500000000000000e+02 5.025000000000000000e+01
7.400000000000000000e+01 2.640715384615384664e+03 5.950632934570312500e+02 5.297119140625000000e+00 0.000000000000000000e+00 0.000000000000000000e+00 2.384083740234375000e+03 2.148564100265502930e+00 4.000000000000000000e+00 9.570910644531250000e+02 -1.262500000000000000e+02 5.025000000000000000e+01
5.200000000000000000e+01 2.327615384615382482e+03 5.559967041015625000e+02 4.443695068359375000e+00 0.000000000000000000e+00 2.352941185235977173e-01 2.189907470703125000e+03 2.292443752288818359e+00 4.000000000000000000e+00 3.028094177246093750e+02 -1.257500000000000000e+02 5.025000000000000000e+01
1.000000000000000000e+01 1.470930769230769329e+03 5.266267700195312500e+02 6.833496093750000000e-01 0.000000000000000000e+00 0.000000000000000000e+00 1.356520629882812500e+03 2.041276931762695312e+00 1.000000000000000000e+00 9.905062866210937500e+02 -1.242500000000000000e+02 5.025000000000000000e+01
3.200000000000000000e+01 1.527446153846153720e+03 6.423146362304687500e+02 -6.083679199218750000e-01 9.999999776482582092e-03 0.000000000000000000e+00 1.196151977539062500e+03 1.563995480537414551e+00 3.000000000000000000e+00 1.764387329101562500e+03 -1.232500000000000000e+02 5.025000000000000000e+01
6.900000000000000000e+01 1.365423076923077588e+03 6.063610229492187500e+02 -6.102600097656250000e-01 0.000000000000000000e+00 5.294117927551269531e-01 1.321180664062500000e+03 1.642556309700012207e+00 4.000000000000000000e+00 1.657941040039062500e+03 -1.227500000000000000e+02 5.025000000000000000e+01
1.100000000000000000e+01 1.183300000000000182e+03 5.178111572265625000e+02 -6.121826171875000000e-01 9.999999776482582092e-03 0.000000000000000000e+00 1.446209350585937500e+03 1.654390335083007812e+00 1.000000000000000000e+00 1.736146972656250000e+03 -1.222500000000000000e+02 5.025000000000000000e+01
1.100000000000000000e+01 8.526692307692309214e+02 3.330796203613281250e+02 -6.824951171875000000e-01 9.999999776482582092e-03 7.647058963775634766e-01 1.538495605468750000e+03 1.785048365592956543e+00 1.000000000000000000e+00 1.563198242187500000e+03 -1.217500000000000000e+02 5.025000000000000000e+01
3.100000000000000000e+01 4.935076923076919684e+02 3.199373779296875000e+02 -9.580993652343750000e-01 0.000000000000000000e+00 1.000000000000000000e+00 1.532555053710937500e+03 1.944698810577392578e+00 3.000000000000000000e+00 1.152114257812500000e+03 -1.212500000000000000e+02 5.025000000000000000e+01
5.700000000000000000e+01 4.077384615384614222e+02 2.626076354980468750e+02 -1.233703613281250000e+00 0.000000000000000000e+00 0.000000000000000000e+00 1.526614379882812500e+03 1.957157492637634277e+00 4.000000000000000000e+00 1.383616088867187500e+03 -1.207500000000000000e+02 5.025000000000000000e+01
5.100000000000000000e+01 4.023923076923076678e+02 1.543791351318359375e+02 -1.509338378906250000e+00 0.000000000000000000e+00 0.000000000000000000e+00 1.520673706054687500e+03 1.969943642616271973e+00 4.000000000000000000e+00 1.267306762695312500e+03 -1.202500000000000000e+02 5.025000000000000000e+01
6.600000000000000000e+01 5.856538461538465299e+02 1.844733123779296875e+02 -1.789703369140625000e+00 9.999999776482582092e-03 0.000000000000000000e+00 1.507085449218750000e+03 2.006231546401977539e+00 4.000000000000000000e+00 1.507128662109375000e+03 -1.197500000000000000e+02 5.025000000000000000e+01
1.200000000000000000e+01 4.914384615384614108e+02 2.316369018554687500e+02 -2.074859619140625000e+00 0.000000000000000000e+00 5.294117927551269531e-01 1.485849365234375000e+03 2.165812730789184570e+00 1.000000000000000000e+00 4.548609008789062500e+02 -1.192500000000000000e+02 5.025000000000000000e+01
5.500000000000000000e+01 7.797769230769234809e+02 3.437623596191406250e+02 -2.359985351562500000e+00 0.000000000000000000e+00 3.529411852359771729e-01 1.464613403320312500e+03 2.033807754516601562e+00 4.000000000000000000e+00 9.100161743164062500e+02 -1.187500000000000000e+02 5.025000000000000000e+01
3.000000000000000000e+01 1.172892307692307213e+03 4.666668395996093750e+02 -2.645141601562500000e+00 9.999999776482582092e-03 2.352941185235977173e-01 1.443377319335937500e+03 1.874020218849182129e+00 3.000000000000000000e+00 1.913094116210937500e+03 -1.182500000000000000e+02 5.025000000000000000e+01
7.800000000000000000e+01 1.201153846153846189e+03 5.088426818847656250e+02 -2.782409667968750000e+00 0.000000000000000000e+00 5.882353186607360840e-01 1.411589599609375000e+03 1.847207665443420410e+00 4.000000000000000000e+00 8.480570678710937500e+02 -1.177500000000000000e+02 5.025000000000000000e+01
3.400000000000000000e+01 5.995846153846151765e+02 2.821731872558593750e+02 -2.497894287109375000e+00 0.000000000000000000e+00 0.000000000000000000e+00 1.442255615234375000e+03 1.674481749534606934e+00 3.000000000000000000e+00 1.626828979492187500e+03 -1.157500000000000000e+02 5.025000000000000000e+01
5.100000000000000000e+01 7.331615384615384983e+02 2.729412536621093750e+02 -1.949401855468750000e+00 9.999999776482582092e-03 3.529411852359771729e-01 1.578836914062500000e+03 1.487687706947326660e+00 4.000000000000000000e+00 1.581397583007812500e+03 -1.152500000000000000e+02 5.025000000000000000e+01
6.000000000000000000e+00 3.870307692307694651e+02 2.203166656494140625e+02 -3.101501464843750000e-01 0.000000000000000000e+00 0.000000000000000000e+00 1.983904174804687500e+03 8.540944457054138184e-01 1.000000000000000000e+00 1.070752929687500000e+03 -1.137500000000000000e+02 5.025000000000000000e+01
1.000000000000000000e+00 3.458384615384616723e+02 2.014285583496093750e+02 2.333984375000000000e-01 0.000000000000000000e+00 0.000000000000000000e+00 2.116744140625000000e+03 2.910062551498413086e+00 1.000000000000000000e+00 9.763724975585937500e+02 -1.132500000000000000e+02 5.025000000000000000e+01
0.000000000000000000e+00 3.328153846153846303e+02 1.608422088623046875e+02 7.769470214843750000e-01 0.000000000000000000e+00 0.000000000000000000e+00 2.249583984375000000e+03 3.510157108306884766e+00 1.000000000000000000e+00 8.917919311523437500e+02 -1.127500000000000000e+02 5.025000000000000000e+01
4.000000000000000000e+00 3.021846153846153129e+02 1.351884765625000000e+02 1.262756347656250000e+00 0.000000000000000000e+00 2.352941185235977173e-01 2.376276855468750000e+03 3.549906015396118164e+00 1.000000000000000000e+00 7.724171142578125000e+02 -1.122500000000000000e+02 5.025000000000000000e+01
2.000000000000000000e+00 2.855307692307691809e+02 1.086262207031250000e+02 2.118896484375000000e+00 0.000000000000000000e+00 2.352941185235977173e-01 2.617368164062500000e+03 3.623906850814819336e+00 1.000000000000000000e+00 7.539991455078125000e+02 -1.112500000000000000e+02 5.025000000000000000e+01
0.000000000000000000e+00 2.888538461538463480e+02 1.252982635498046875e+02 2.546966552734375000e+00 0.000000000000000000e+00 1.588235259056091309e+00 2.737913818359375000e+03 3.601275205612182617e+00 1.000000000000000000e+00 7.151439819335937500e+02 -1.107500000000000000e+02 5.025000000000000000e+01
1.000000000000000000e+00 2.987461538461538453e+02 1.517259521484375000e+02 2.732330322265625000e+00 0.000000000000000000e+00 5.294117927551269531e-01 2.808100830078125000e+03 3.556640386581420898e+00 1.000000000000000000e+00 7.912818603515625000e+02 -1.102500000000000000e+02 5.025000000000000000e+01
1.000000000000000000e+00 3.230999999999998522e+02 1.848735198974609375e+02 2.836761474609375000e+00 0.000000000000000000e+00 0.000000000000000000e+00 2.861501708984375000e+03 3.540634393692016602e+00 1.000000000000000000e+00 7.541359252929687500e+02 -1.097500000000000000e+02 5.025000000000000000e+01
4.000000000000000000e+00 3.402846153846156767e+02 2.012303466796875000e+02 2.941223144531250000e+00 0.000000000000000000e+00 5.882352963089942932e-02 2.914902832031250000e+03 3.534353494644165039e+00 1.000000000000000000e+00 7.150734863281250000e+02 -1.092500000000000000e+02 5.025000000000000000e+01
4.000000000000000000e+00 3.160153846153846757e+02 1.694391784667968750e+02 2.825256347656250000e+00 0.000000000000000000e+00 0.000000000000000000e+00 2.952128662109375000e+03 3.486744642257690430e+00 1.000000000000000000e+00 7.530700683593750000e+02 -1.082500000000000000e+02 5.025000000000000000e+01
5.000000000000000000e+00 3.318692307692307395e+02 1.838915405273437500e+02 2.384399414062500000e+00 0.000000000000000000e+00 0.000000000000000000e+00 2.919778564453125000e+03 3.495410442352294922e+00 1.000000000000000000e+00 7.526983032226562500e+02 -1.072500000000000000e+02 5.025000000000000000e+01
5.000000000000000000e+00 3.369769230769229011e+02 1.835867462158203125e+02 2.137145996093750000e+00 0.000000000000000000e+00 0.000000000000000000e+00 2.896001708984375000e+03 3.509970664978027344e+00 1.000000000000000000e+00 7.228624877929687500e+02 -1.067500000000000000e+02 5.025000000000000000e+01
3.000000000000000000e+00 5.000538461538461661e+02 2.570056457519531250e+02 6.040649414062500000e-01 0.000000000000000000e+00 2.117647171020507812e+00 2.694002929687500000e+03 3.283920526504516602e+00 1.000000000000000000e+00 5.795292358398437500e+02 -1.002500000000000000e+02 5.025000000000000000e+01
4.800000000000000000e+01 1.905692307692308532e+03 4.509435729980468750e+02 3.374053955078125000e+00 0.000000000000000000e+00 2.352941185235977173e-01 1.935531005859375000e+03 2.041269302368164062e+00 4.000000000000000000e+00 7.003946533203125000e+02 -1.257500000000000000e+02 5.075000000000000000e+01
1.900000000000000000e+01 1.594369230769231763e+03 4.579452209472656250e+02 2.234832763671875000e+00 0.000000000000000000e+00 0.000000000000000000e+00 1.691559692382812500e+03 1.827320694923400879e+00 1.000000000000000000e+00 1.186470336914062500e+03 -1.252500000000000000e+02 5.075000000000000000e+01
0.000000000000000000e+00 1.288292307692307531e+03 4.806287536621093750e+02 9.948730468750000000e-01 9.999999776482582092e-03 0.000000000000000000e+00 1.423885253906250000e+03 1.839478492736816406e+00 1.000000000000000000e+00 1.585523681640625000e+03 -1.247500000000000000e+02 5.075000000000000000e+01
6.000000000000000000e+00 1.111653846153846416e+03 5.941304321289062500e+02 -1.468261718750000000e+00 0.000000000000000000e+00 0.000000000000000000e+00 1.019029113769531250e+03 1.257511377334594727e+00 1.000000000000000000e+00 1.947363281250000000e+03 -1.232500000000000000e+02 5.075000000000000000e+01
2.000000000000000000e+00 8.248076923076920366e+02 5.257600708007812500e+02 -1.451507568359375000e+00 0.000000000000000000e+00 5.882353186607360840e-01 1.149521728515625000e+03 1.668467640876770020e+00 1.000000000000000000e+00 1.812723876953125000e+03 -1.227500000000000000e+02 5.075000000000000000e+01
3.400000000000000000e+01 7.858461538461538112e+02 4.073132019042968750e+02 -1.434783935546875000e+00 0.000000000000000000e+00 6.470588445663452148e-01 1.280014404296875000e+03 1.721846342086791992e+00 3.000000000000000000e+00 9.251932983398437500e+02 -1.222500000000000000e+02 5.075000000000000000e+01
5.900000000000000000e+01 5.065076923076925937e+02 2.774731750488281250e+02 -1.498809814453125000e+00 1.406033337116241455e-01 2.352941185235977173e-01 1.372935668945312500e+03 1.856443405151367188e+00 4.000000000000000000e+00 1.782346801757812500e+03 -1.217500000000000000e+02 5.075000000000000000e+01
2.000000000000000000e+00 3.453692307692305121e+02 2.442580871582031250e+02 -1.805236816406250000e+00 0.000000000000000000e+00 5.882352963089942932e-02 1.353142578125000000e+03 2.000236511230468750e+00 1.000000000000000000e+00 4.567500915527343750e+02 -1.212500000000000000e+02 5.075000000000000000e+01
3.800000000000000000e+01 4.010846153846154039e+02 1.490482635498046875e+02 -2.418060302734375000e+00 0.000000000000000000e+00 2.352941185235977173e-01 1.313556640625000000e+03 2.082827806472778320e+00 3.000000000000000000e+00 7.994185180664062500e+02 -1.202500000000000000e+02 5.075000000000000000e+01
2.300000000000000000e+01 5.994384615384615245e+02 1.957810363769531250e+02 -2.695922851562500000e+00 0.000000000000000000e+00 7.058823704719543457e-01 1.297072875976562500e+03 2.057859659194946289e+00 3.000000000000000000e+00 5.162697753906250000e+02 -1.197500000000000000e+02 5.075000000000000000e+01
6.000000000000000000e+01 1.000984615384615381e+03 4.138882446289062500e+02 -3.194488525390625000e+00 0.000000000000000000e+00 2.352941185235977173e-01 1.270723754882812500e+03 2.002580642700195312e+00 4.000000000000000000e+00 1.184969482421875000e+03 -1.187500000000000000e+02 5.075000000000000000e+01
5.700000000000000000e+01 1.353630769230769602e+03 5.768646240234375000e+02 -3.493255615234375000e+00 0.000000000000000000e+00 0.000000000000000000e+00 1.246700805664062500e+03 1.769025087356567383e+00 4.000000000000000000e+00 7.742891845703125000e+02 -1.177500000000000000e+02 5.075000000000000000e+01
3.300000000000000000e+01 1.348661538461538157e+03 5.826194458007812500e+02 -3.476165771484375000e+00 2.286592274904251099e-01 0.000000000000000000e+00 1.236627929687500000e+03 1.554982423782348633e+00 3.000000000000000000e+00 1.534231323242187500e+03 -1.172500000000000000e+02 5.075000000000000000e+01
6.700000000000000000e+01 6.419538461538463707e+02 2.671477050781250000e+02 -1.672760009765625000e+00 1.069910526275634766e-01 0.000000000000000000e+00 1.656239746093750000e+03 1.497767448425292969e+00 4.000000000000000000e+00 1.791572998046875000e+03 -1.147500000000000000e+02 5.075000000000000000e+01
3.000000000000000000e+00 3.727923076923077588e+02 2.049811706542968750e+02 -5.255126953125000000e-01 0.000000000000000000e+00 0.000000000000000000e+00 1.939311523437500000e+03 1.959843993186950684e+00 1.000000000000000000e+00 1.080350830078125000e+03 -1.137500000000000000e+02 5.075000000000000000e+01
1.000000000000000000e+00 3.451153846153846416e+02 1.582876434326171875e+02 6.023864746093750000e-01 0.000000000000000000e+00 0.000000000000000000e+00 2.216323242187500000e+03 3.453091859817504883e+00 1.000000000000000000e+00 8.386262817382812500e+02 -1.127500000000000000e+02 5.075000000000000000e+01
4.000000000000000000e+00 3.216076923076923322e+02 1.324940795898437500e+02 1.082366943359375000e+00 0.000000000000000000e+00 0.000000000000000000e+00 2.343191894531250000e+03 3.491236925125122070e+00 1.000000000000000000e+00 7.662572021484375000e+02 -1.122500000000000000e+02 5.075000000000000000e+01
5.000000000000000000e+00 2.921999999999999886e+02 1.282422790527343750e+02 1.478424072265625000e+00 0.000000000000000000e+00 0.000000000000000000e+00 2.458423583984375000e+03 3.510749340057373047e+00 1.000000000000000000e+00 7.198114624023437500e+02 -1.117500000000000000e+02 5.075000000000000000e+01
2.000000000000000000e+00 2.614923076923076906e+02 1.196586990356445312e+02 1.874450683593750000e+00 0.000000000000000000e+00 2.941176593303680420e-01 2.573655029296875000e+03 3.534750461578369141e+00 1.000000000000000000e+00 7.658287353515625000e+02 -1.112500000000000000e+02 5.075000000000000000e+01
1.000000000000000000e+00 2.723000000000000682e+02 1.259344253540039062e+02 2.270477294921875000e+00 0.000000000000000000e+00 0.000000000000000000e+00 2.688886474609375000e+03 3.542708396911621094e+00 1.000000000000000000e+00 7.925377807617187500e+02 -1.107500000000000000e+02 5.075000000000000000e+01
0.000000000000000000e+00 2.811230769230768374e+02 1.417937927246093750e+02 2.410217285156250000e+00 0.000000000000000000e+00 0.000000000000000000e+00 2.750071289062500000e+03 3.563951969146728516e+00 1.000000000000000000e+00 7.244193115234375000e+02 -1.102500000000000000e+02 5.075000000000000000e+01
2.000000000000000000e+00 3.138461538461538680e+02 1.559351959228515625e+02 2.464477539062500000e+00 0.000000000000000000e+00 0.000000000000000000e+00 2.793240478515625000e+03 3.550670146942138672e+00 1.000000000000000000e+00 7.166848754882812500e+02 -1.097500000000000000e+02 5.075000000000000000e+01
0.000000000000000000e+00 3.226076923076924459e+02 1.644618988037109375e+02 2.518768310546875000e+00 0.000000000000000000e+00 0.000000000000000000e+00 2.836409667968750000e+03 3.542253732681274414e+00 1.000000000000000000e+00 7.112188110351562500e+02 -1.092500000000000000e+02 5.075000000000000000e+01
1.000000000000000000e+00 3.043076923076922640e+02 1.674902801513671875e+02 2.573028564453125000e+00 0.000000000000000000e+00 0.000000000000000000e+00 2.879579101562500000e+03 3.541121959686279297e+00 1.000000000000000000e+00 6.731296997070312500e+02 -1.087500000000000000e+02 5.075000000000000000e+01
6.000000000000000000e+00 3.099769230769231285e+02 1.906132812500000000e+02 2.079528808593750000e+00 0.000000000000000000e+00 0.000000000000000000e+00 2.837812255859375000e+03 3.531788349151611328e+00 1.000000000000000000e+00 7.222064819335937500e+02 -1.077500000000000000e+02 5.075000000000000000e+01
4.000000000000000000e+00 3.167538461538462116e+02 1.977027435302734375e+02 1.832794189453125000e+00 0.000000000000000000e+00 0.000000000000000000e+00 2.816928710937500000e+03 3.509482622146606445e+00 1.000000000000000000e+00 5.900749511718750000e+02 -1.072500000000000000e+02 5.075000000000000000e+01
1.000000000000000000e+00 3.303923076923076678e+02 2.045436096191406250e+02 1.568756103515625000e+00 0.000000000000000000e+00 0.000000000000000000e+00 2.790365966796875000e+03 3.504919290542602539e+00 1.000000000000000000e+00 6.258916625976562500e+02 -1.067500000000000000e+02 5.075000000000000000e+01
3.000000000000000000e+00 4.775384615384616041e+02 2.198020782470703125e+02 4.144287109375000000e-02 0.000000000000000000e+00 1.000000000000000000e+00 2.590543212890625000e+03 3.357424259185791016e+00 1.000000000000000000e+00 5.094258422851562500e+02 -1.017500000000000000e+02 5.075000000000000000e+01
5.400000000000000000e+01 2.232200000000001182e+03 5.372940063476562500e+02 4.575317382812500000e+00 0.000000000000000000e+00 0.000000000000000000e+00 2.115961669921875000e+03 2.232694864273071289e+00 4.000000000000000000e+00 8.418273162841796875e+01 -1.272500000000000000e+02 5.125000000000000000e+01
2.000000000000000000e+01 2.035807692307692832e+03 5.260311889648437500e+02 3.881134033203125000e+00 0.000000000000000000e+00 0.000000000000000000e+00 2.000029052734375000e+03 1.923736572265625000e+00 3.000000000000000000e+00 1.238278198242187500e+03 -1.267500000000000000e+02 5.125000000000000000e+01
5.700000000000000000e+01 1.803138461538460888e+03 4.817588806152343750e+02 3.186920166015625000e+00 0.000000000000000000e+00 0.000000000000000000e+00 1.884096313476562500e+03 1.811419486999511719e+00 4.000000000000000000e+00 8.344835205078125000e+02 -1.262500000000000000e+02 5.125000000000000000e+01
4.600000000000000000e+01 1.543084615384614608e+03 4.552609558105468750e+02 2.492736816406250000e+00 0.000000000000000000e+00 0.000000000000000000e+00 1.768163574218750000e+03 1.634583234786987305e+00 4.000000000000000000e+00 1.075796630859375000e+03 -1.257500000000000000e+02 5.125000000000000000e+01
1.000000000000000000e+00 1.339523076923076587e+03 4.163767395019531250e+02 1.571838378906250000e+00 0.000000000000000000e+00 0.000000000000000000e+00 1.594086791992187500e+03 1.351782917976379395e+00 1.000000000000000000e+00 1.513331665039062500e+03 -1.252500000000000000e+02 5.125000000000000000e+01
3.000000000000000000e+01 8.828384615384610470e+02 4.630402221679687500e+02 -1.417572021484375000e+00 0.000000000000000000e+00 0.000000000000000000e+00 1.013712036132812500e+03 1.378862619400024414e+00 3.000000000000000000e+00 1.728789306640625000e+03 -1.237500000000000000e+02 5.125000000000000000e+01
1.500000000000000000e+01 6.653769230769229353e+02 3.917894287109375000e+02 -1.572570800781250000e+00 9.999999776482582092e-03 5.882352963089942932e-02 1.179438476562500000e+03 1.610068917274475098e+00 1.000000000000000000e+00 1.566042114257812500e+03 -1.227500000000000000e+02 5.125000000000000000e+01
2.300000000000000000e+01 4.717923076923079293e+02 3.174960327148437500e+02 -1.650054931640625000e+00 0.000000000000000000e+00 0.000000000000000000e+00 1.262301635742187500e+03 1.827944636344909668e+00 3.000000000000000000e+00 1.163367431640625000e+03 -1.222500000000000000e+02 5.125000000000000000e+01
2.500000000000000000e+01 4.644307692307692719e+02 2.501055755615234375e+02 -1.798126220703125000e+00 0.000000000000000000e+00 0.000000000000000000e+00 1.312453613281250000e+03 1.911268591880798340e+00 3.000000000000000000e+00 1.213621582031250000e+03 -1.217500000000000000e+02 5.125000000000000000e+01
2.000000000000000000e+01 4.108384615384613880e+02 2.122359466552734375e+02 -2.157897949218750000e+00 0.000000000000000000e+00 0.000000000000000000e+00 1.264472045898437500e+03 1.991146683692932129e+00 3.000000000000000000e+00 1.050169921875000000e+03 -1.212500000000000000e+02 5.125000000000000000e+01
4.200000000000000000e+01 5.567230769230766327e+02 1.866910095214843750e+02 -2.517639160156250000e+00 0.000000000000000000e+00 0.000000000000000000e+00 1.216490600585937500e+03 1.994809746742248535e+00 3.000000000000000000e+00 1.281846557617187500e+03 -1.207500000000000000e+02 5.125000000000000000e+01
6.600000000000000000e+01 6.014538461538460297e+02 1.904819183349609375e+02 -2.877380371093750000e+00 0.000000000000000000e+00 2.352941185235977173e-01 1.168509033203125000e+03 1.977137804031372070e+00 4.000000000000000000e+00 1.013475097656250000e+03 -1.202500000000000000e+02 5.125000000000000000e+01
6.500000000000000000e+01 8.404769230769232990e+02 2.596905517578125000e+02 -3.147186279296875000e+00 9.999999776482582092e-03 4.705882370471954346e-01 1.142915771484375000e+03 1.886314034461975098e+00 4.000000000000000000e+00 1.268730224609375000e+03 -1.197500000000000000e+02 5.125000000000000000e+01
4.100000000000000000e+01 9.978538461538457796e+02 3.894050903320312500e+02 -3.327056884765625000e+00 0.000000000000000000e+00 8.235294222831726074e-01 1.139711059570312500e+03 1.876726984977722168e+00 3.000000000000000000e+00 1.388623413085937500e+03 -1.192500000000000000e+02 5.125000000000000000e+01
2.000000000000000000e+00 1.273753846153847007e+03 4.912336425781250000e+02 -3.506896972656250000e+00 0.000000000000000000e+00 2.352941185235977173e-01 1.136506225585937500e+03 1.772149801254272461e+00 1.000000000000000000e+00 1.850737426757812500e+03 -1.187500000000000000e+02 5.125000000000000000e+01
5.800000000000000000e+01 1.538015384615384846e+03 5.463234252929687500e+02 -3.686767578125000000e+00 0.000000000000000000e+00 3.529411852359771729e-01 1.133301513671875000e+03 1.087053418159484863e+00 4.000000000000000000e+00 9.912733154296875000e+02 -1.182500000000000000e+02 5.125000000000000000e+01
2.700000000000000000e+01 1.705415384615384710e+03 5.819368286132812500e+02 -3.623138427734375000e+00 3.739428818225860596e-01 0.000000000000000000e+00 1.157361083984375000e+03 1.049342751502990723e+00 3.000000000000000000e+00 1.922992797851562500e+03 -1.177500000000000000e+02 5.125000000000000000e+01
6.200000000000000000e+01 1.033661538461538612e+03 5.376561889648437500e+02 -3.333526611328125000e+00 0.000000000000000000e+00 0.000000000000000000e+00 1.223656738281250000e+03 1.445176601409912109e+00 4.000000000000000000e+00 1.745875610351562500e+03 -1.167500000000000000e+02 5.125000000000000000e+01
7.000000000000000000e+00 5.503846153846153584e+02 2.673769226074218750e+02 -1.616638183593750000e+00 0.000000000000000000e+00 0.000000000000000000e+00 1.657369506835937500e+03 7.190361022949218750e-01 1.000000000000000000e+00 1.301066162109375000e+03 -1.147500000000000000e+02 5.125000000000000000e+01
4.000000000000000000e+00 4.661769230769231172e+02 2.143645019531250000e+02 -1.090911865234375000e+00 0.000000000000000000e+00 0.000000000000000000e+00 1.790905395507812500e+03 8.055008053779602051e-01 1.000000000000000000e+00 1.190620239257812500e+03 -1.142500000000000000e+02 5.125000000000000000e+01
1.000000000000000000e+00 3.958461538461540385e+02 1.945319366455078125e+02 -5.601501464843750000e-01 0.000000000000000000e+00 0.000000000000000000e+00 1.924484130859375000e+03 1.859081745147705078e+00 1.000000000000000000e+00 9.847489013671875000e+02 -1.137500000000000000e+02 5.125000000000000000e+01
5.000000000000000000e+00 3.314384615384615245e+02 1.470409240722656250e+02 9.370117187500000000e-01 0.000000000000000000e+00 0.000000000000000000e+00 2.311316894531250000e+03 3.415352582931518555e+00 1.000000000000000000e+00 7.559796752929687500e+02 -1.122500000000000000e+02 5.125000000000000000e+01
5.000000000000000000e+00 3.036307692307693173e+02 1.326647186279296875e+02 1.277557373046875000e+00 0.000000000000000000e+00 0.000000000000000000e+00 2.417088867187500000e+03 3.397351741790771484e+00 1.000000000000000000e+00 7.641409301757812500e+02 -1.117500000000000000e+02 5.125000000000000000e+01
5.000000000000000000e+00 2.766384615384615699e+02 1.241729278564453125e+02 1.618103027343750000e+00 0.000000000000000000e+00 0.000000000000000000e+00 2.522860839843750000e+03 3.408376455307006836e+00 1.000000000000000000e+00 7.762044067382812500e+02 -1.112500000000000000e+02 5.125000000000000000e+01
5.000000000000000000e+00 2.875846153846154607e+02 1.256973648071289062e+02 1.958648681640625000e+00 0.000000000000000000e+00 0.000000000000000000e+00 2.628632812500000000e+03 3.431429862976074219e+00 1.000000000000000000e+00 7.695335083007812500e+02 -1.107500000000000000e+02 5.125000000000000000e+01
5.000000000000000000e+00 2.968846153846154721e+02 1.343416595458984375e+02 2.049468994140625000e+00 0.000000000000000000e+00 0.000000000000000000e+00 2.680662353515625000e+03 3.464574575424194336e+00 1.000000000000000000e+00 7.397543945312500000e+02 -1.102500000000000000e+02 5.125000000000000000e+01
0.000000000000000000e+00 3.058846153846154721e+02 1.474654998779296875e+02 2.057037353515625000e+00 0.000000000000000000e+00 0.000000000000000000e+00 2.714777832031250000e+03 3.476637601852416992e+00 1.000000000000000000e+00 6.877773437500000000e+02 -1.097500000000000000e+02 5.125000000000000000e+01
1.000000000000000000e+00 3.123384615384617291e+02 1.568625793457031250e+02 2.064605712890625000e+00 0.000000000000000000e+00 0.000000000000000000e+00 2.748893554687500000e+03 3.469867229461669922e+00 1.000000000000000000e+00 6.787004394531250000e+02 -1.092500000000000000e+02 5.125000000000000000e+01
0.000000000000000000e+00 3.096307692307690900e+02 1.719778594970703125e+02 1.814422607421875000e+00 0.000000000000000000e+00 2.941176593303680420e-01 2.760782470703125000e+03 3.485103607177734375e+00 1.000000000000000000e+00 6.359288330078125000e+02 -1.082500000000000000e+02 5.125000000000000000e+01
9.000000000000000000e+00 3.202076923076923549e+02 1.991815948486328125e+02 1.556671142578125000e+00 0.000000000000000000e+00 0.000000000000000000e+00 2.738555908203125000e+03 3.504797220230102539e+00 1.000000000000000000e+00 5.722769165039062500e+02 -1.077500000000000000e+02 5.125000000000000000e+01
7.000000000000000000e+00 5.523846153846159268e+02 1.787323913574218750e+02 -3.271484375000000000e-02 0.000000000000000000e+00 0.000000000000000000e+00 2.566132568359375000e+03 2.476564884185791016e+00 1.000000000000000000e+00 4.875391540527343750e+02 -1.007500000000000000e+02 5.125000000000000000e+01
7.500000000000000000e+01 3.138869230769229944e+03 6.091313476562500000e+02 4.076385498046875000e+00 0.000000000000000000e+00 0.000000000000000000e+00 1.953665161132812500e+03 2.246046304702758789e+00 4.000000000000000000e+00 2.216110687255859375e+02 -1.277500000000000000e+02 5.175000000000000000e+01
7.200000000000000000e+01 2.574500000000000000e+03 5.862507324218750000e+02 3.265502929687500000e+00 0.000000000000000000e+00 0.000000000000000000e+00 1.777806884765625000e+03 1.912869453430175781e+00 4.000000000000000000e+00 8.134819335937500000e+02 -1.272500000000000000e+02 5.175000000000000000e+01
9.000000000000000000e+00 2.026292307692307304e+03 5.151359252929687500e+02 2.714141845703125000e+00 0.000000000000000000e+00 0.000000000000000000e+00 1.718803344726562500e+03 1.767668008804321289e+00 1.000000000000000000e+00 1.326183959960937500e+03 -1.267500000000000000e+02 5.175000000000000000e+01
1.000000000000000000e+00 1.641892307692307895e+03 4.213594360351562500e+02 2.162780761718750000e+00 0.000000000000000000e+00 0.000000000000000000e+00 1.659799804687500000e+03 1.405230164527893066e+00 1.000000000000000000e+00 1.497305419921875000e+03 -1.262500000000000000e+02 5.175000000000000000e+01
5.300000000000000000e+01 1.343299999999999727e+03 3.947579040527343750e+02 1.611419677734375000e+00 0.000000000000000000e+00 2.941176593303680420e-01 1.600796264648437500e+03 1.391751170158386230e+00 4.000000000000000000e+00 1.149692504882812500e+03 -1.257500000000000000e+02 5.175000000000000000e+01
1.400000000000000000e+01 1.135146153846153993e+03 3.057758483886718750e+02 9.088439941406250000e-01 5.433080196380615234e-01 5.294117927551269531e-01 1.496613891601562500e+03 1.393998026847839355e+00 1.000000000000000000e+00 1.956757934570312500e+03 -1.252500000000000000e+02 5.175000000000000000e+01
3.600000000000000000e+01 5.041615384615385551e+02 2.091865386962890625e+02 -5.971374511718750000e-01 0.000000000000000000e+00 0.000000000000000000e+00 1.258129638671875000e+03 1.729506731033325195e+00 3.000000000000000000e+00 1.378151245117187500e+03 -1.242500000000000000e+02 5.175000000000000000e+01
2.900000000000000000e+01 4.719000000000002046e+02 2.581965637207031250e+02 -1.350128173828125000e+00 0.000000000000000000e+00 8.823529481887817383e-01 1.138887573242187500e+03 1.766249537467956543e+00 3.000000000000000000e+00 1.241383178710937500e+03 -1.237500000000000000e+02 5.175000000000000000e+01
2.100000000000000000e+01 3.791692307692309782e+02 2.885184936523437500e+02 -1.521881103515625000e+00 0.000000000000000000e+00 2.352941185235977173e-01 1.174121337890625000e+03 1.791177630424499512e+00 3.000000000000000000e+00 1.283567504882812500e+03 -1.232500000000000000e+02 5.175000000000000000e+01
4.900000000000000000e+01 3.657846153846154493e+02 2.806498413085937500e+02 -1.693603515625000000e+00 0.000000000000000000e+00 0.000000000000000000e+00 1.209355102539062500e+03 1.883111476898193359e+00 4.000000000000000000e+00 1.047333251953125000e+03 -1.227500000000000000e+02 5.175000000000000000e+01
6.900000000000000000e+01 3.804923076923078611e+02 2.592072753906250000e+02 -1.865356445312500000e+00 0.000000000000000000e+00 7.647058963775634766e-01 1.244588867187500000e+03 1.981209754943847656e+00 4.000000000000000000e+00 9.904421997070312500e+02 -1.222500000000000000e+02 5.175000000000000000e+01
6.400000000000000000e+01 4.284692307692308191e+02 2.429413299560546875e+02 -2.097442626953125000e+00 0.000000000000000000e+00 0.000000000000000000e+00 1.251971679687500000e+03 2.008298635482788086e+00 4.000000000000000000e+00 1.064200805664062500e+03 -1.217500000000000000e+02 5.175000000000000000e+01
4.900000000000000000e+01 4.978769230769227647e+02 2.331153411865234375e+02 -2.510528564453125000e+00 0.000000000000000000e+00 2.352941185235977173e-01 1.175801513671875000e+03 2.012546777725219727e+00 4.000000000000000000e+00 1.008172973632812500e+03 -1.212500000000000000e+02 5.175000000000000000e+01
4.200000000000000000e+01 7.029384615384617518e+02 2.535692901611328125e+02 -2.923614501953125000e+00 0.000000000000000000e+00 4.705882370471954346e-01 1.099631469726562500e+03 1.980815768241882324e+00 3.000000000000000000e+00 1.178273071289062500e+03 -1.207500000000000000e+02 5.175000000000000000e+01
5.600000000000000000e+01 7.604000000000000909e+02 2.930364685058593750e+02 -3.336730957031250000e+00 0.000000000000000000e+00 0.000000000000000000e+00 1.023461364746093750e+03 1.908674955368041992e+00 4.000000000000000000e+00 1.415177856445312500e+03 -1.202500000000000000e+02 5.175000000000000000e+01
5.800000000000000000e+01 1.033500000000000227e+03 3.944580078125000000e+02 -3.598480224609375000e+00 9.999999776482582092e-03 2.941176593303680420e-01 9.887588500976562500e+02 1.741578102111816406e+00 4.000000000000000000e+00 1.168028198242187500e+03 -1.197500000000000000e+02 5.175000000000000000e+01
4.800000000000000000e+01 1.134476923076922958e+03 4.863350524902343750e+02 -3.708892822265625000e+00 9.999999776482582092e-03 0.000000000000000000e+00 9.955238647460937500e+02 1.667719960212707520e+00 4.000000000000000000e+00 1.681588256835937500e+03 -1.192500000000000000e+02 5.175000000000000000e+01
5.500000000000000000e+01 1.331876923076923276e+03 5.290398559570312500e+02 -3.819335937500000000e+00 0.000000000000000000e+00 5.294117927551269531e-01 1.002288879394531250e+03 1.515022158622741699e+00 4.000000000000000000e+00 1.239281860351562500e+03 -1.187500000000000000e+02 5.175000000000000000e+01
6.200000000000000000e+01 1.401353846153846916e+03 5.487744140625000000e+02 -3.752990722656250000e+00 9.999999776482582092e-03 2.352941185235977173e-01 1.068021484375000000e+03 1.212414979934692383e+00 4.000000000000000000e+00 1.677941894531250000e+03 -1.177500000000000000e+02 5.175000000000000000e+01
5.300000000000000000e+01 6.266076923076924459e+02 2.601325683593750000e+02 -2.018798828125000000e+00 0.000000000000000000e+00 2.941176593303680420e-01 1.538041748046875000e+03 1.630504131317138672e+00 4.000000000000000000e+00 1.649852539062500000e+03 -1.152500000000000000e+02 5.175000000000000000e+01
1.900000000000000000e+01 5.343999999999998636e+02 2.319320526123046875e+02 -1.560485839843750000e+00 0.000000000000000000e+00 1.764705926179885864e-01 1.658499267578125000e+03 1.772187113761901855e+00 1.000000000000000000e+00 1.160038574218750000e+03 -1.147500000000000000e+02 5.175000000000000000e+01
6.000000000000000000e+00 3.401230769230768942e+02 1.389890136718750000e+02 1.076721191406250000e+00 0.000000000000000000e+00 0.000000000000000000e+00 2.375754150390625000e+03 3.317130088806152344e+00 1.000000000000000000e+00 8.072971191406250000e+02 -1.117500000000000000e+02 5.175000000000000000e+01
5.000000000000000000e+00 3.084384615384615813e+02 1.238668746948242188e+02 1.361785888671875000e+00 0.000000000000000000e+00 0.000000000000000000e+00 2.472066650390625000e+03 3.302870512008666992e+00 1.000000000000000000e+00 7.660095825195312500e+02 -1.112500000000000000e+02 5.175000000000000000e+01
5.000000000000000000e+00 3.212615384615385210e+02 1.234337463378906250e+02 1.646820068359375000e+00 0.000000000000000000e+00 0.000000000000000000e+00 2.568379150390625000e+03 3.341025352478027344e+00 1.000000000000000000e+00 7.534255981445312500e+02 -1.107500000000000000e+02 5.175000000000000000e+01
6.000000000000000000e+00 3.288923076923075541e+02 1.250182342529296875e+02 1.688720703125000000e+00 0.000000000000000000e+00 0.000000000000000000e+00 2.611253662109375000e+03 3.380146980285644531e+00 1.000000000000000000e+00 6.708427734375000000e+02 -1.102500000000000000e+02 5.175000000000000000e+01
5.000000000000000000e+00 3.309769230769232990e+02 1.343179626464843750e+02 1.649566650390625000e+00 0.000000000000000000e+00 0.000000000000000000e+00 2.636315429687500000e+03 3.390677928924560547e+00 1.000000000000000000e+00 7.191429443359375000e+02 -1.097500000000000000e+02 5.175000000000000000e+01
2.000000000000000000e+00 3.241846153846154266e+02 1.481765136718750000e+02 1.610412597656250000e+00 0.000000000000000000e+00 0.000000000000000000e+00 2.661377197265625000e+03 3.395056009292602539e+00 1.000000000000000000e+00 7.056986083984375000e+02 -1.092500000000000000e+02 5.175000000000000000e+01
0.000000000000000000e+00 3.238384615384615017e+02 1.584577789306640625e+02 1.571289062500000000e+00 0.000000000000000000e+00 3.529411852359771729e-01 2.686438964843750000e+03 3.385730504989624023e+00 1.000000000000000000e+00 6.258101196289062500e+02 -1.087500000000000000e+02 5.175000000000000000e+01
2.000000000000000000e+00 3.300384615384618314e+02 1.705020294189453125e+02 1.302551269531250000e+00 0.000000000000000000e+00 0.000000000000000000e+00 2.662869384765625000e+03 3.403754711151123047e+00 1.000000000000000000e+00 6.747471923828125000e+02 -1.082500000000000000e+02 5.175000000000000000e+01
6.000000000000000000e+00 3.229846153846153243e+02 2.678687744140625000e+02 7.651062011718750000e-01 0.000000000000000000e+00 5.882353186607360840e-01 2.615729980468750000e+03 3.454234838485717773e+00 1.000000000000000000e+00 5.342119750976562500e+02 -1.072500000000000000e+02 5.175000000000000000e+01
1.800000000000000000e+01 4.575384615384614904e+02 2.036488189697265625e+02 -6.492004394531250000e-01 0.000000000000000000e+00 1.294117689132690430e+00 2.457696777343750000e+03 3.221464872360229492e+00 1.000000000000000000e+00 5.312339477539062500e+02 -1.032500000000000000e+02 5.175000000000000000e+01
5.000000000000000000e+01 5.407307692307692832e+02 1.753310699462890625e+02 -3.235473632812500000e-01 9.999999776482582092e-03 1.470588207244873047e+00 2.509095703125000000e+03 8.239580988883972168e-01 4.000000000000000000e+00 6.545857543945312500e+02 -1.012500000000000000e+02 5.175000000000000000e+01
5.500000000000000000e+01 5.746384615384615699e+02 1.523570404052734375e+02 -2.473449707031250000e-01 9.999999776482582092e-03 0.000000000000000000e+00 2.519489746093750000e+03 8.342844843864440918e-01 4.000000000000000000e+00 6.775545043945312500e+02 -1.007500000000000000e+02 5.175000000000000000e+01
2.000000000000000000e+00 1.855730769230769738e+03 4.157297668457031250e+02 1.547180175781250000e+00 0.000000000000000000e+00 2.941176593303680420e-01 1.437577636718750000e+03 1.704167246818542480e+00 1.000000000000000000e+00 1.282362915039062500e+03 -1.267500000000000000e+02 5.225000000000000000e+01
0.000000000000000000e+00 1.420015384615384619e+03 2.824417419433593750e+02 1.138641357421875000e+00 9.999999776482582092e-03 0.000000000000000000e+00 1.435503295898437500e+03 1.542563080787658691e+00 1.000000000000000000e+00 1.820341186523437500e+03 -1.262500000000000000e+02 5.225000000000000000e+01
1.800000000000000000e+01 1.115653846153846189e+03 2.867966918945312500e+02 7.301330566406250000e-01 0.000000000000000000e+00 5.882352963089942932e-02 1.433428955078125000e+03 1.539183735847473145e+00 1.000000000000000000e+00 9.160560913085937500e+02 -1.257500000000000000e+02 5.225000000000000000e+01
4.000000000000000000e+01 8.167076923076923549e+02 2.245036926269531250e+02 2.458496093750000000e-01 0.000000000000000000e+00 0.000000000000000000e+00 1.399140991210937500e+03 1.623943567276000977e+00 3.000000000000000000e+00 1.219189819335937500e+03 -1.252500000000000000e+02 5.225000000000000000e+01
4.800000000000000000e+01 6.171615384615383846e+02 1.376041259765625000e+02 -2.636413574218750000e-01 9.999999776482582092e-03 0.000000000000000000e+00 1.354114990234375000e+03 1.722468733787536621e+00 4.000000000000000000e+00 1.544017211914062500e+03 -1.247500000000000000e+02 5.225000000000000000e+01
3.000000000000000000e+01 4.260769230769229807e+02 1.394813842773437500e+02 -7.731628417968750000e-01 0.000000000000000000e+00 0.000000000000000000e+00 1.309089111328125000e+03 1.849372386932373047e+00 3.000000000000000000e+00 1.122523559570312500e+03 -1.242500000000000000e+02 5.225000000000000000e+01
2.300000000000000000e+01 3.578076923076923208e+02 1.776664733886718750e+02 -1.282684326171875000e+00 0.000000000000000000e+00 0.000000000000000000e+00 1.264063110351562500e+03 1.903648257255554199e+00 3.000000000000000000e+00 1.088967285156250000e+03 -1.237500000000000000e+02 5.225000000000000000e+01
2.500000000000000000e+01 3.729692307692308191e+02 2.211523437500000000e+02 -1.548675537109375000e+00 0.000000000000000000e+00 5.294117927551269531e-01 1.251667480468750000e+03 1.885615944862365723e+00 3.000000000000000000e+00 1.183639892578125000e+03 -1.232500000000000000e+02 5.225000000000000000e+01
3.700000000000000000e+01 4.227615384615384073e+02 2.376499176025390625e+02 -1.814666748046875000e+00 0.000000000000000000e+00 7.058823704719543457e-01 1.239271728515625000e+03 1.910413146018981934e+00 3.000000000000000000e+00 1.142759277343750000e+03 -1.227500000000000000e+02 5.225000000000000000e+01
5.700000000000000000e+01 4.210538461538462798e+02 2.556651306152343750e+02 -2.080657958984375000e+00 0.000000000000000000e+00 0.000000000000000000e+00 1.226876098632812500e+03 2.032485723495483398e+00 4.000000000000000000e+00 6.825238647460937500e+02 -1.222500000000000000e+02 5.225000000000000000e+01
4.700000000000000000e+01 5.336384615384616836e+02 2.580588989257812500e+02 -2.396759033203125000e+00 0.000000000000000000e+00 0.000000000000000000e+00 1.191489746093750000e+03 2.029155731201171875e+00 4.000000000000000000e+00 1.021844177246093750e+03 -1.217500000000000000e+02 5.225000000000000000e+01
5.900000000000000000e+01 6.892769230769231399e+02 2.678727722167968750e+02 -2.863189697265625000e+00 0.000000000000000000e+00 0.000000000000000000e+00 1.087131103515625000e+03 1.940292000770568848e+00 4.000000000000000000e+00 1.251373779296875000e+03 -1.212500000000000000e+02 5.225000000000000000e+01
5.300000000000000000e+01 1.090807692307692378e+03 4.704992370605468750e+02 -4.090759277343750000e+00 0.000000000000000000e+00 0.000000000000000000e+00 8.513366699218750000e+02 1.115306973457336426e+00 4.000000000000000000e+00 1.094031372070312500e+03 -1.192500000000000000e+02 5.225000000000000000e+01
4.000000000000000000e+01 1.115984615384616063e+03 4.754613647460937500e+02 -4.131774902343750000e+00 0.000000000000000000e+00 0.000000000000000000e+00 8.680714721679687500e+02 1.294304728507995605e+00 3.000000000000000000e+00 1.940713012695312500e+03 -1.187500000000000000e+02 5.225000000000000000e+01
2.000000000000000000e+00 1.090961538461538566e+03 4.635611877441406250e+02 -4.172760009765625000e+00 5.347923636436462402e-01 0.000000000000000000e+00 8.848062133789062500e+02 7.139617800712585449e-01 1.000000000000000000e+00 1.941091064453125000e+03 -1.182500000000000000e+02 5.225000000000000000e+01
5.100000000000000000e+01 6.923461538461538112e+02 3.486440734863281250e+02 -2.682189941406250000e+00 9.999999776482582092e-03 2.941176593303680420e-01 1.337448974609375000e+03 1.431113123893737793e+00 4.000000000000000000e+00 1.920178222656250000e+03 -1.162500000000000000e+02 5.225000000000000000e+01
5.700000000000000000e+01 6.441846153846155403e+02 2.853277587890625000e+02 -2.289581298828125000e+00 0.000000000000000000e+00 0.000000000000000000e+00 1.444842285156250000e+03 1.583703875541687012e+00 4.000000000000000000e+00 1.524180908203125000e+03 -1.157500000000000000e+02 5.225000000000000000e+01
3.600000000000000000e+01 5.869846153846154948e+02 2.540787200927734375e+02 -1.896972656250000000e+00 0.000000000000000000e+00 0.000000000000000000e+00 1.552235595703125000e+03 1.792163968086242676e+00 3.000000000000000000e+00 1.225608032226562500e+03 -1.152500000000000000e+02 5.225000000000000000e+01
5.000000000000000000e+00 3.926923076923076792e+02 1.453413391113281250e+02 8.758850097656250000e-01 0.000000000000000000e+00 2.941176593303680420e-01 2.334419433593750000e+03 3.323366880416870117e+00 1.000000000000000000e+00 7.581229858398437500e+02 -1.117500000000000000e+02 5.225000000000000000e+01
3.000000000000000000e+00 3.797846153846153925e+02 1.303087158203125000e+02 1.105438232421875000e+00 0.000000000000000000e+00 5.882352963089942932e-02 2.421272460937500000e+03 3.303083181381225586e+00 1.000000000000000000e+00 7.669839477539062500e+02 -1.112500000000000000e+02 5.225000000000000000e+01
6.000000000000000000e+00 3.758999999999999773e+02 1.305256652832031250e+02 1.334991455078125000e+00 0.000000000000000000e+00 0.000000000000000000e+00 2.508125244140625000e+03 3.315335750579833984e+00 1.000000000000000000e+00 6.926364746093750000e+02 -1.107500000000000000e+02 5.225000000000000000e+01
1.000000000000000000e+00 3.866384615384616836e+02 1.344821472167968750e+02 1.328002929687500000e+00 0.000000000000000000e+00 0.000000000000000000e+00 2.541844726562500000e+03 3.337440490722656250e+00 1.000000000000000000e+00 6.803093261718750000e+02 -1.102500000000000000e+02 5.225000000000000000e+01
3.700000000000000000e+01 4.841384615384613426e+02 2.054080657958984375e+02 -9.510803222656250000e-01 0.000000000000000000e+00 4.117647111415863037e-01 2.400094970703125000e+03 2.516417741775512695e+00 3.000000000000000000e+00 6.456119384765625000e+02 -1.032500000000000000e+02 5.225000000000000000e+01
4.900000000000000000e+01 4.902307692307691127e+02 2.156472015380859375e+02 -8.706665039062500000e-01 0.000000000000000000e+00 0.000000000000000000e+00 2.413161132812500000e+03 1.738768935203552246e+00 4.000000000000000000e+00 5.800095825195312500e+02 -1.027500000000000000e+02 5.225000000000000000e+01
5.500000000000000000e+01 5.044846153846153811e+02 2.175328216552734375e+02 -7.565917968750000000e-01 0.000000000000000000e+00 0.000000000000000000e+00 2.430214599609375000e+03 8.585768938064575195e-01 4.000000000000000000e+00 5.241331176757812500e+02 -1.022500000000000000e+02 5.225000000000000000e+01
3.800000000000000000e+01 5.151230769230770647e+02 2.032028961181640625e+02 -6.425170898437500000e-01 0.000000000000000000e+00 0.000000000000000000e+00 2.447268310546875000e+03 8.203011751174926758e-01 3.000000000000000000e+00 5.744323120117187500e+02 -1.017500000000000000e+02 5.225000000000000000e+01
6.000000000000000000e+00 5.341923076923076223e+02 1.796724243164062500e+02 -5.284729003906250000e-01 0.000000000000000000e+00 2.941176593303680420e-01 2.464321777343750000e+03 1.507764697074890137e+00 1.000000000000000000e+00 3.206966857910156250e+02 -1.012500000000000000e+02 5.225000000000000000e+01
5.700000000000000000e+01 5.575615384615385892e+02 1.604437866210937500e+02 -4.620056152343750000e-01 0.000000000000000000e+00 1.352941155433654785e+00 2.472846923828125000e+03 1.084669947624206543e+00 4.000000000000000000e+00 3.237557067871093750e+02 -1.007500000000000000e+02 5.225000000000000000e+01
1.000000000000000000e+00 2.543499999999999545e+03 6.402989501953125000e+02 1.898345947265625000e+00 0.000000000000000000e+00 0.000000000000000000e+00 1.452907104492187500e+03 1.417439818382263184e+00 1.000000000000000000e+00 8.456716308593750000e+02 -1.277500000000000000e+02 5.275000000000000000e+01
4.000000000000000000e+00 1.577992307692307577e+03 3.419484252929687500e+02 7.959289550781250000e-01 1.079351082444190979e-01 0.000000000000000000e+00 1.335023559570312500e+03 1.619327187538146973e+00 1.000000000000000000e+00 1.141264892578125000e+03 -1.267500000000000000e+02 5.275000000000000000e+01
7.200000000000000000e+01 1.165284615384615336e+03 2.891770019531250000e+02 4.501953125000000000e-01 0.000000000000000000e+00 8.823529481887817383e-01 1.350959350585937500e+03 1.627217292785644531e+00 4.000000000000000000e+00 8.452434692382812500e+02 -1.262500000000000000e+02 5.275000000000000000e+01
5.600000000000000000e+01 8.792384615384610242e+02 2.751862487792968750e+02 1.044616699218750000e-01 2.639084160327911377e-01 2.941176593303680420e-01 1.366895141601562500e+03 1.640986442565917969e+00 4.000000000000000000e+00 1.823990844726562500e+03 -1.257500000000000000e+02 5.275000000000000000e+01
1.300000000000000000e+01 7.041923076923077360e+02 2.073384246826171875e+02 -2.536315917968750000e-01 4.544714689254760742e-01 2.941176593303680420e-01 1.359378662109375000e+03 1.647232174873352051e+00 1.000000000000000000e+00 1.847818115234375000e+03 -1.252500000000000000e+02 5.275000000000000000e+01
3.700000000000000000e+01 5.886461538461541068e+02 1.449727935791015625e+02 -6.158447265625000000e-01 9.999999776482582092e-03 4.705882370471954346e-01 1.344044677734375000e+03 1.649510145187377930e+00 3.000000000000000000e+00 1.656206787109375000e+03 -1.247500000000000000e+02 5.275000000000000000e+01
5.700000000000000000e+01 4.908769230769230489e+02 1.647587280273437500e+02 -9.780883789062500000e-01 9.999999776482582092e-03 0.000000000000000000e+00 1.328710693359375000e+03 1.705463767051696777e+00 4.000000000000000000e+00 1.469044433593750000e+03 -1.242500000000000000e+02 5.275000000000000000e+01
4.800000000000000000e+01 4.454538461538463139e+02 2.045993194580078125e+02 -1.340301513671875000e+00 9.999999776482582092e-03 2.941176593303680420e-01 1.313376708984375000e+03 1.775629997253417969e+00 4.000000000000000000e+00 1.314285156250000000e+03 -1.237500000000000000e+02 5.275000000000000000e+01
3.000000000000000000e+01 4.590615384615385324e+02 2.406132507324218750e+02 -1.561523437500000000e+00 0.000000000000000000e+00 2.941176593303680420e-01 1.294129638671875000e+03 1.848097562789916992e+00 3.000000000000000000e+00 1.315183227539062500e+03 -1.232500000000000000e+02 5.275000000000000000e+01
6.500000000000000000e+01 5.060769230769229239e+02 2.538084869384765625e+02 -1.782745361328125000e+00 0.000000000000000000e+00 0.000000000000000000e+00 1.274882446289062500e+03 1.929462194442749023e+00 4.000000000000000000e+00 1.206238769531250000e+03 -1.227500000000000000e+02 5.275000000000000000e+01
1.700000000000000000e+01 5.809461538461536065e+02 2.622173461914062500e+02 -2.003997802734375000e+00 0.000000000000000000e+00 2.352941185235977173e-01 1.255635375976562500e+03 1.983638644218444824e+00 1.000000000000000000e+00 1.000040405273437500e+03 -1.222500000000000000e+02 5.275000000000000000e+01
4.400000000000000000e+01 7.829384615384616382e+02 2.797578735351562500e+02 -2.260192871093750000e+00 0.000000000000000000e+00 0.000000000000000000e+00 1.220533203125000000e+03 1.897423148155212402e+00 3.000000000000000000e+00 1.178834106445312500e+03 -1.217500000000000000e+02 5.275000000000000000e+01
6.200000000000000000e+01 9.139307692307691013e+02 2.938366699218750000e+02 -2.621246337890625000e+00 0.000000000000000000e+00 2.941176593303680420e-01 1.137865844726562500e+03 9.747611284255981445e-01 4.000000000000000000e+00 1.707042846679687500e+03 -1.212500000000000000e+02 5.275000000000000000e+01
5.300000000000000000e+01 9.231384615384613426e+02 3.144640502929687500e+02 -2.982330322265625000e+00 9.999999776482582092e-03 0.000000000000000000e+00 1.055198486328125000e+03 1.204934477806091309e+00 4.000000000000000000e+00 1.368506469726562500e+03 -1.207500000000000000e+02 5.275000000000000000e+01
6.000000000000000000e+00 9.869538461538460297e+02 3.401090087890625000e+02 -3.343383789062500000e+00 4.325776398181915283e-01 5.882353186607360840e-01 9.725311279296875000e+02 9.401230216026306152e-01 1.000000000000000000e+00 1.966505126953125000e+03 -1.202500000000000000e+02 5.275000000000000000e+01
5.400000000000000000e+01 9.267230769230765191e+02 3.362967834472656250e+02 -3.539367675781250000e+00 0.000000000000000000e+00 0.000000000000000000e+00 9.605688476562500000e+02 1.238379478454589844e+00 4.000000000000000000e+00 8.721864013671875000e+02 -1.192500000000000000e+02 5.275000000000000000e+01
4.400000000000000000e+01 7.018538461538462343e+02 2.771838684082031250e+02 -2.548217773437500000e+00 9.999999776482582092e-03 0.000000000000000000e+00 1.322005737304687500e+03 1.509956121444702148e+00 3.000000000000000000e+00 1.680677368164062500e+03 -1.167500000000000000e+02 5.275000000000000000e+01
5.900000000000000000e+01 5.884076923076924004e+02 2.700622558593750000e+02 -2.179382324218750000e+00 0.000000000000000000e+00 2.941176593303680420e-01 1.437416503906250000e+03 1.712050199508666992e+00 4.000000000000000000e+00 1.292322387695312500e+03 -1.162500000000000000e+02 5.275000000000000000e+01
4.400000000000000000e+01 5.609384615384614108e+02 2.608846130371093750e+02 -1.851135253906250000e+00 0.000000000000000000e+00 0.000000000000000000e+00 1.533966064453125000e+03 1.829939484596252441e+00 3.000000000000000000e+00 1.089926147460937500e+03 -1.157500000000000000e+02 5.275000000000000000e+01
4.700000000000000000e+01 5.578461538461538112e+02 2.526489868164062500e+02 -1.522888183593750000e+00 0.000000000000000000e+00 0.000000000000000000e+00 1.630515502929687500e+03 1.069349765777587891e+00 4.000000000000000000e+00 1.007056457519531250e+03 -1.152500000000000000e+02 5.275000000000000000e+01
4.700000000000000000e+01 5.777076923076922412e+02 2.419716339111328125e+02 -1.194641113281250000e+00 0.000000000000000000e+00 0.000000000000000000e+00 1.727064941406250000e+03 1.843437314033508301e+00 4.000000000000000000e+00 9.987631835937500000e+02 -1.147500000000000000e+02 5.275000000000000000e+01
3.000000000000000000e+00 4.679615384615383959e+02 1.910127410888671875e+02 -9.927368164062500000e-02 0.000000000000000000e+00 8.823529481887817383e-01 2.044703735351562500e+03 3.247699499130249023e+00 1.000000000000000000e+00 7.743010864257812500e+02 -1.132500000000000000e+02 5.275000000000000000e+01
3.000000000000000000e+00 4.835384615384614904e+02 2.045012817382812500e+02 -1.256561279296875000e+00 0.000000000000000000e+00 8.235294222831726074e-01 2.346953125000000000e+03 3.136277198791503906e+00 1.000000000000000000e+00 4.560611267089843750e+02 -1.032500000000000000e+02 5.275000000000000000e+01
4.900000000000000000e+01 4.816615384615383277e+02 2.288598785400390625e+02 -1.175292968750000000e+00 0.000000000000000000e+00 1.117647051811218262e+00 2.359574218750000000e+03 8.282575607299804688e-01 4.000000000000000000e+00 4.214620361328125000e+02 -1.027500000000000000e+02 5.275000000000000000e+01
4.900000000000000000e+01 5.077461538461538453e+02 2.247726287841796875e+02 -9.576416015625000000e-01 0.000000000000000000e+00 5.882352963089942932e-02 2.391044189453125000e+03 8.827311992645263672e-01 4.000000000000000000e+00 4.008840332031250000e+02 -1.017500000000000000e+02 5.275000000000000000e+01
5.400000000000000000e+01 5.243461538461535838e+02 1.886646881103515625e+02 -8.488159179687500000e-01 9.999999776482582092e-03 5.882353186607360840e-01 2.406779296875000000e+03 1.141593933105468750e+00 4.000000000000000000e+00 5.085118713378906250e+02 -1.012500000000000000e+02 5.275000000000000000e+01
7.100000000000000000e+01 1.939846153846153356e+03 5.009942016601562500e+02 8.300476074218750000e+00 0.000000000000000000e+00 0.000000000000000000e+00 3.157925781250000000e+03 2.236181974411010742e+00 4.000000000000000000e+00 2.487668457031250000e+02 -1.322500000000000000e+02 5.325000000000000000e+01
5.900000000000000000e+01 3.010630769230771421e+03 6.183909301757812500e+02 3.028411865234375000e+00 0.000000000000000000e+00 0.000000000000000000e+00 1.757555908203125000e+03 2.028481245040893555e+00 4.000000000000000000e+00 6.434152221679687500e+02 -1.287500000000000000e+02 5.325000000000000000e+01
0.000000000000000000e+00 2.142523076923077042e+03 6.170579833984375000e+02 1.131347656250000000e+00 0.000000000000000000e+00 0.000000000000000000e+00 1.363314208984375000e+03 1.274380326271057129e+00 1.000000000000000000e+00 1.589154907226562500e+03 -1.277500000000000000e+02 5.325000000000000000e+01
2.000000000000000000e+00 1.705207692307692923e+03 5.320778808593750000e+02 5.015563964843750000e-01 0.000000000000000000e+00 0.000000000000000000e+00 1.274896606445312500e+03 1.214390516281127930e+00 1.000000000000000000e+00 1.174998046875000000e+03 -1.272500000000000000e+02 5.325000000000000000e+01
5.900000000000000000e+01 6.442538461538460979e+02 2.749826660156250000e+02 -4.314575195312500000e-01 0.000000000000000000e+00 5.882353186607360840e-01 1.335753173828125000e+03 1.836037158966064453e+00 4.000000000000000000e+00 1.011596496582031250e+03 -1.257500000000000000e+02 5.325000000000000000e+01
2.000000000000000000e+01 5.607538461538459842e+02 2.048036804199218750e+02 -6.957397460937500000e-01 0.000000000000000000e+00 6.470588445663452148e-01 1.339872314453125000e+03 1.833534955978393555e+00 3.000000000000000000e+00 1.223620727539062500e+03 -1.252500000000000000e+02 5.325000000000000000e+01
5.300000000000000000e+01 5.165692307692308987e+02 1.952169799804687500e+02 -9.444274902343750000e-01 0.000000000000000000e+00 1.176470592617988586e-01 1.338602661132812500e+03 1.820217967033386230e+00 4.000000000000000000e+00 1.064626464843750000e+03 -1.247500000000000000e+02 5.325000000000000000e+01
5.500000000000000000e+01 4.873615384615385437e+02 2.332355804443359375e+02 -1.193115234375000000e+00 0.000000000000000000e+00 3.529411852359771729e-01 1.337333007812500000e+03 1.826536655426025391e+00 4.000000000000000000e+00 1.125214477539062500e+03 -1.242500000000000000e+02 5.325000000000000000e+01
4.500000000000000000e+01 4.820461538461540840e+02 2.768065185546875000e+02 -1.441833496093750000e+00 0.000000000000000000e+00 7.647058963775634766e-01 1.336063232421875000e+03 1.869390249252319336e+00 4.000000000000000000e+00 9.190346679687500000e+02 -1.237500000000000000e+02 5.325000000000000000e+01
4.500000000000000000e+01 5.171461538461538794e+02 2.865669250488281250e+02 -1.569488525390625000e+00 0.000000000000000000e+00 8.823529481887817383e-01 1.324277465820312500e+03 1.954197645187377930e+00 4.000000000000000000e+00 8.499434814453125000e+02 -1.232500000000000000e+02 5.325000000000000000e+01
1.700000000000000000e+01 5.887923076923076451e+02 2.855379943847656250e+02 -1.697174072265625000e+00 0.000000000000000000e+00 1.764705926179885864e-01 1.312491821289062500e+03 2.010566473007202148e+00 1.000000000000000000e+00 7.447448120117187500e+02 -1.227500000000000000e+02 5.325000000000000000e+01
6.900000000000000000e+01 7.476846153846151992e+02 2.889152221679687500e+02 -1.824829101562500000e+00 0.000000000000000000e+00 0.000000000000000000e+00 1.300706054687500000e+03 1.652362704277038574e+00 4.000000000000000000e+00 9.447837524414062500e+02 -1.222500000000000000e+02 5.325000000000000000e+01
6.600000000000000000e+01 8.997153846153844370e+02 3.078505554199218750e+02 -1.970581054687500000e+00 9.999999776482582092e-03 0.000000000000000000e+00 1.280999633789062500e+03 1.258212924003601074e+00 4.000000000000000000e+00 1.163463012695312500e+03 -1.217500000000000000e+02 5.325000000000000000e+01
3.000000000000000000e+00 9.226153846153841869e+02 3.060389709472656250e+02 -2.370635986328125000e+00 4.221104085445404053e-01 0.000000000000000000e+00 1.194062377929687500e+03 7.577629685401916504e-01 1.000000000000000000e+00 1.552817871093750000e+03 -1.207500000000000000e+02 5.325000000000000000e+01
6.500000000000000000e+01 8.289384615384611834e+02 2.850794067382812500e+02 -2.570648193359375000e+00 1.546230912208557129e-01 5.882352963089942932e-02 1.150593750000000000e+03 1.357347607612609863e+00 4.000000000000000000e+00 1.397042968750000000e+03 -1.202500000000000000e+02 5.325000000000000000e+01
1.000000000000000000e+00 8.825461538461543114e+02 2.705591430664062500e+02 -2.667236328125000000e+00 5.548105239868164062e-01 0.000000000000000000e+00 1.138822753906250000e+03 1.095034003257751465e+00 1.000000000000000000e+00 1.980379150390625000e+03 -1.197500000000000000e+02 5.325000000000000000e+01
6.000000000000000000e+00 8.363000000000005230e+02 2.493819427490234375e+02 -2.660400390625000000e+00 3.087928295135498047e-01 0.000000000000000000e+00 1.158749511718750000e+03 1.032964348793029785e+00 1.000000000000000000e+00 1.998291625976562500e+03 -1.192500000000000000e+02 5.325000000000000000e+01
7.600000000000000000e+01 7.194846153846150401e+02 2.147096557617187500e+02 -2.646728515625000000e+00 0.000000000000000000e+00 0.000000000000000000e+00 1.198603027343750000e+03 1.500489592552185059e+00 4.000000000000000000e+00 1.599635742187500000e+03 -1.182500000000000000e+02 5.325000000000000000e+01
5.200000000000000000e+01 6.138923076923077815e+02 2.119494476318359375e+02 -2.433807373046875000e+00 0.000000000000000000e+00 0.000000000000000000e+00 1.274531616210937500e+03 1.669128417968750000e+00 4.000000000000000000e+00 1.322569580078125000e+03 -1.177500000000000000e+02 5.325000000000000000e+01
2.800000000000000000e+01 6.093846153846153584e+02 2.193148193359375000e+02 -2.152221679687500000e+00 0.000000000000000000e+00 0.000000000000000000e+00 1.369127441406250000e+03 1.778084278106689453e+00 3.000000000000000000e+00 1.268942138671875000e+03 -1.172500000000000000e+02 5.325000000000000000e+01
4.300000000000000000e+01 5.863230769230772239e+02 2.307404174804687500e+02 -1.870605468750000000e+00 0.000000000000000000e+00 0.000000000000000000e+00 1.463723388671875000e+03 1.865571975708007812e+00 3.000000000000000000e+00 1.138230712890625000e+03 -1.167500000000000000e+02 5.325000000000000000e+01
7.000000000000000000e+01 5.710846153846152902e+02 2.379966125488281250e+02 -1.588989257812500000e+00 0.000000000000000000e+00 0.000000000000000000e+00 1.558319213867187500e+03 1.887607455253601074e+00 4.000000000000000000e+00 1.079693481445312500e+03 -1.162500000000000000e+02 5.325000000000000000e+01
4.300000000000000000e+01 5.672615384615385210e+02 2.327539215087890625e+02 -1.324645996093750000e+00 0.000000000000000000e+00 0.000000000000000000e+00 1.644804199218750000e+03 1.476237535476684570e+00 3.000000000000000000e+00 9.780343017578125000e+02 -1.157500000000000000e+02 5.325000000000000000e+01
3.900000000000000000e+01 5.593230769230766555e+02 2.225121154785156250e+02 -1.060272216796875000e+00 0.000000000000000000e+00 0.000000000000000000e+00 1.731289184570312500e+03 2.208189725875854492e+00 3.000000000000000000e+00 8.862611694335937500e+02 -1.152500000000000000e+02 5.325000000000000000e+01
3.800000000000000000e+01 4.108538461538462343e+02 1.888210296630859375e+02 -3.889160156250000000e-01 0.000000000000000000e+00 0.000000000000000000e+00 2.396406982421875000e+03 3.154842615127563477e+00 3.000000000000000000e+00 7.477438964843750000e+02 -1.077500000000000000e+02 5.325000000000000000e+01
3.400000000000000000e+01 4.044923076923075200e+02 2.049480438232421875e+02 -6.776123046875000000e-01 0.000000000000000000e+00 8.235294222831726074e-01 2.371646240234375000e+03 3.168606281280517578e+00 3.000000000000000000e+00 6.540908813476562500e+02 -1.072500000000000000e+02 5.325000000000000000e+01
1.200000000000000000e+01 4.273538461538458932e+02 2.257312927246093750e+02 -1.316223144531250000e+00 0.000000000000000000e+00 1.470588207244873047e+00 2.310217529296875000e+03 3.216004371643066406e+00 1.000000000000000000e+00 4.555774536132812500e+02 -1.057500000000000000e+02 5.325000000000000000e+01
3.100000000000000000e+01 4.550538461538459956e+02 1.976864624023437500e+02 -1.592742919921875000e+00 0.000000000000000000e+00 6.470588445663452148e-01 2.283607177734375000e+03 1.848659396171569824e+00 3.000000000000000000e+00 4.263945617675781250e+02 -1.047500000000000000e+02 5.325000000000000000e+01
4.300000000000000000e+01 4.801461538461535952e+02 2.216102600097656250e+02 -1.490631103515625000e+00 9.999999776482582092e-03 0.000000000000000000e+00 2.306036865234375000e+03 9.553409218788146973e-01 3.000000000000000000e+00 5.333898925781250000e+02 -1.027500000000000000e+02 5.325000000000000000e+01
6.200000000000000000e+01 4.875153846153849599e+02 2.384967193603515625e+02 -1.397003173828125000e+00 9.999999776482582092e-03 0.000000000000000000e+00 2.318942626953125000e+03 1.524796128273010254e+00 4.000000000000000000e+00 5.803774414062500000e+02 -1.022500000000000000e+02 5.325000000000000000e+01
3.000000000000000000e+01 4.782615384615385778e+02 2.245132293701171875e+02 -1.303375244140625000e+00 0.000000000000000000e+00 0.000000000000000000e+00 2.331848632812500000e+03 2.042661905288696289e+00 3.000000000000000000e+00 3.051187744140625000e+02 -1.017500000000000000e+02 5.325000000000000000e+01
3.100000000000000000e+01 4.922461538461540158e+02 1.914135589599609375e+02 -1.209747314453125000e+00 0.000000000000000000e+00 0.000000000000000000e+00 2.344754638671875000e+03 2.058164358139038086e+00 3.000000000000000000e+00 2.636670227050781250e+02 -1.012500000000000000e+02 5.325000000000000000e+01
6.000000000000000000e+01 1.824230769230769056e+03 5.665700683593750000e+02 8.202392578125000000e+00 0.000000000000000000e+00 0.000000000000000000e+00 3.121462646484375000e+03 2.228686094284057617e+00 4.000000000000000000e+00 3.703970336914062500e+02 -1.327500000000000000e+02 5.375000000000000000e+01
2.400000000000000000e+01 2.663823076923077679e+03 5.959166259765625000e+02 2.552368164062500000e+00 0.000000000000000000e+00 0.000000000000000000e+00 1.605722900390625000e+03 1.964889526367187500e+00 3.000000000000000000e+00 7.572944335937500000e+02 -1.292500000000000000e+02 5.375000000000000000e+01
5.900000000000000000e+01 2.348869230769230853e+03 6.053610839843750000e+02 1.823028564453125000e+00 0.000000000000000000e+00 0.000000000000000000e+00 1.495055664062500000e+03 1.523792624473571777e+00 4.000000000000000000e+00 3.757812805175781250e+02 -1.287500000000000000e+02 5.375000000000000000e+01
6.300000000000000000e+01 1.914569230769230899e+03 6.090539550781250000e+02 1.093658447265625000e+00 0.000000000000000000e+00 0.000000000000000000e+00 1.384388427734375000e+03 8.885974884033203125e-01 4.000000000000000000e+00 8.666544189453125000e+02 -1.282500000000000000e+02 5.375000000000000000e+01
1.100000000000000000e+01 1.601423076923075996e+03 5.803416137695312500e+02 3.643188476562500000e-01 1.828354895114898682e-01 0.000000000000000000e+00 1.273721313476562500e+03 7.930898070335388184e-01 1.000000000000000000e+00 1.399519775390625000e+03 -1.277500000000000000e+02 5.375000000000000000e+01
1.000000000000000000e+00 1.271876923076922822e+03 5.051884460449218750e+02 -1.385192871093750000e-01 9.999999776482582092e-03 5.882353186607360840e-01 1.230705322265625000e+03 1.598608016967773438e+00 1.000000000000000000e+00 1.674663330078125000e+03 -1.272500000000000000e+02 5.375000000000000000e+01
3.800000000000000000e+01 8.744384615384614108e+02 4.132690734863281250e+02 -4.147949218750000000e-01 0.000000000000000000e+00 5.294117927551269531e-01 1.255340698242187500e+03 1.750711202621459961e+00 3.000000000000000000e+00 9.131380615234375000e+02 -1.267500000000000000e+02 5.375000000000000000e+01
5.400000000000000000e+01 4.703153846153846871e+02 2.471253204345703125e+02 -9.673767089843750000e-01 0.000000000000000000e+00 0.000000000000000000e+00 1.304611328125000000e+03 1.851414203643798828e+00 4.000000000000000000e+00 8.970708618164062500e+02 -1.257500000000000000e+02 5.375000000000000000e+01
2.600000000000000000e+01 4.934153846153845961e+02 2.306769561767578125e+02 -1.137817382812500000e+00 9.999999776482582092e-03 1.058823585510253906e+00 1.320366088867187500e+03 1.870403885841369629e+00 3.000000000000000000e+00 8.614681396484375000e+02 -1.252500000000000000e+02 5.375000000000000000e+01
3.000000000000000000e+01 5.066307692307691468e+02 2.624559020996093750e+02 -1.273010253906250000e+00 0.000000000000000000e+00 7.647058963775634766e-01 1.333160644531250000e+03 1.896314620971679688e+00 3.000000000000000000e+00 7.740490722656250000e+02 -1.247500000000000000e+02 5.375000000000000000e+01
6.200000000000000000e+01 5.126615384615386120e+02 2.979802246093750000e+02 -1.408172607421875000e+00 9.999999776482582092e-03 5.882353186607360840e-01 1.345955200195312500e+03 1.893358826637268066e+00 4.000000000000000000e+00 1.295022827148437500e+03 -1.242500000000000000e+02 5.375000000000000000e+01
5.800000000000000000e+01 5.215153846153847326e+02 3.206785888671875000e+02 -1.543334960937500000e+00 0.000000000000000000e+00 2.352941185235977173e-01 1.358749755859375000e+03 1.918133378028869629e+00 4.000000000000000000e+00 9.287236328125000000e+02 -1.237500000000000000e+02 5.375000000000000000e+01
4.200000000000000000e+01 5.644153846153848235e+02 3.331824951171875000e+02 -1.577453613281250000e+00 0.000000000000000000e+00 2.352941185235977173e-01 1.354425415039062500e+03 1.983635544776916504e+00 3.000000000000000000e+00 8.375258178710937500e+02 -1.232500000000000000e+02 5.375000000000000000e+01
2.300000000000000000e+01 6.213923076923076678e+02 3.397463989257812500e+02 -1.611572265625000000e+00 0.000000000000000000e+00 0.000000000000000000e+00 1.350101074218750000e+03 2.029794931411743164e+00 3.000000000000000000e+00 7.303138427734375000e+02 -1.227500000000000000e+02 5.375000000000000000e+01
6.100000000000000000e+01 8.028076923076916955e+02 3.388968200683593750e+02 -1.645690917968750000e+00 0.000000000000000000e+00 4.705882370471954346e-01 1.345776733398437500e+03 1.930437684059143066e+00 4.000000000000000000e+00 8.211953735351562500e+02 -1.222500000000000000e+02 5.375000000000000000e+01
6.500000000000000000e+01 8.893769230769232763e+02 3.433092346191406250e+02 -1.680999755859375000e+00 0.000000000000000000e+00 0.000000000000000000e+00 1.341465942382812500e+03 1.445461988449096680e+00 4.000000000000000000e+00 8.286653442382812500e+02 -1.217500000000000000e+02 5.375000000000000000e+01
7.300000000000000000e+01 9.014692307692311033e+02 3.415502929687500000e+02 -1.719970703125000000e+00 9.999999776482582092e-03 2.352941185235977173e-01 1.337196044921875000e+03 1.545299410820007324e+00 4.000000000000000000e+00 1.031271118164062500e+03 -1.212500000000000000e+02 5.375000000000000000e+01
9.000000000000000000e+00 8.423000000000000682e+02 3.201087951660156250e+02 -1.758941650390625000e+00 9.999999776482582092e-03 1.176470592617988586e-01 1.332926269531250000e+03 1.568104386329650879e+00 1.000000000000000000e+00 1.598962402343750000e+03 -1.207500000000000000e+02 5.375000000000000000e+01
1.800000000000000000e+01 7.932307692307693969e+02 2.639593505859375000e+02 -1.805419921875000000e+00 1.695750355720520020e-01 2.941176593303680420e-01 1.336657714843750000e+03 1.494537353515625000e+00 1.000000000000000000e+00 1.835687866210937500e+03 -1.197500000000000000e+02 5.375000000000000000e+01
4.000000000000000000e+01 6.901461538461537657e+02 2.583036499023437500e+02 -1.781463623046875000e+00 3.567108809947967529e-01 2.352941185235977173e-01 1.356930297851562500e+03 1.529006600379943848e+00 3.000000000000000000e+00 1.625506713867187500e+03 -1.192500000000000000e+02 5.375000000000000000e+01
6.000000000000000000e+01 6.657384615384614790e+02 2.580595092773437500e+02 -1.757476806640625000e+00 9.999999776482582092e-03 0.000000000000000000e+00 1.377202758789062500e+03 1.546762108802795410e+00 4.000000000000000000e+00 1.675348510742187500e+03 -1.187500000000000000e+02 5.375000000000000000e+01
6.300000000000000000e+01 5.935923076923073722e+02 2.518395233154296875e+02 -1.733520507812500000e+00 9.999999776482582092e-03 0.000000000000000000e+00 1.397475341796875000e+03 1.665271282196044922e+00 4.000000000000000000e+00 1.355512939453125000e+03 -1.182500000000000000e+02 5.375000000000000000e+01
5.600000000000000000e+01 5.669384615384619792e+02 2.371907806396484375e+02 -1.581756591796875000e+00 0.000000000000000000e+00 0.000000000000000000e+00 1.457879150390625000e+03 1.804855465888977051e+00 4.000000000000000000e+00 1.256316650390625000e+03 -1.177500000000000000e+02 5.375000000000000000e+01
5.800000000000000000e+01 5.678692307692307395e+02 2.246610717773437500e+02 -1.387359619140625000e+00 0.000000000000000000e+00 2.941176593303680420e-01 1.531660034179687500e+03 1.886378288269042969e+00 4.000000000000000000e+00 1.126429321289062500e+03 -1.172500000000000000e+02 5.375000000000000000e+01
4.800000000000000000e+01 5.934615384615385665e+02 2.224442901611328125e+02 -1.192993164062500000e+00 0.000000000000000000e+00 0.000000000000000000e+00 1.605440917968750000e+03 9.736731648445129395e-01 4.000000000000000000e+00 1.049976806640625000e+03 -1.167500000000000000e+02 5.375000000000000000e+01
2.500000000000000000e+01 5.553538461538463480e+02 1.943795471191406250e+02 -7.981567382812500000e-01 0.000000000000000000e+00 0.000000000000000000e+00 1.755642333984375000e+03 1.963021159172058105e+00 3.000000000000000000e+00 8.404988403320312500e+02 -1.157500000000000000e+02 5.375000000000000000e+01
5.700000000000000000e+01 5.440923076923077133e+02 1.824221801757812500e+02 -5.976867675781250000e-01 0.000000000000000000e+00 0.000000000000000000e+00 1.832062744140625000e+03 3.076267480850219727e+00 4.000000000000000000e+00 8.188818969726562500e+02 -1.152500000000000000e+02 5.375000000000000000e+01
4.100000000000000000e+01 4.334846153846153811e+02 1.946384429931640625e+02 1.478881835937500000e-01 0.000000000000000000e+00 6.470588445663452148e-01 2.384753662109375000e+03 3.200503587722778320e+00 3.000000000000000000e+00 6.728245849609375000e+02 -1.097500000000000000e+02 5.375000000000000000e+01
4.300000000000000000e+01 4.170000000000003979e+02 1.943638916015625000e+02 -4.782104492187500000e-02 0.000000000000000000e+00 0.000000000000000000e+00 2.381192138671875000e+03 3.157144546508789062e+00 3.000000000000000000e+00 6.678251342773437500e+02 -1.092500000000000000e+02 5.375000000000000000e+01
5.900000000000000000e+01 4.152538461538458705e+02 1.932475433349609375e+02 -2.435302734375000000e-01 0.000000000000000000e+00 7.647058963775634766e-01 2.377630615234375000e+03 2.877338886260986328e+00 4.000000000000000000e+00 6.747014770507812500e+02 -1.087500000000000000e+02 5.375000000000000000e+01
4.200000000000000000e+01 4.213384615384617291e+02 1.970648345947265625e+02 -5.357666015625000000e-01 0.000000000000000000e+00 0.000000000000000000e+00 2.353157958984375000e+03 1.998007655143737793e+00 3.000000000000000000e+00 6.623675537109375000e+02 -1.082500000000000000e+02 5.375000000000000000e+01
6.100000000000000000e+01 4.369846153846153243e+02 2.494067840576171875e+02 -1.120178222656250000e+00 0.000000000000000000e+00 5.882353186607360840e-01 2.304212402343750000e+03 8.779948949813842773e-01 4.000000000000000000e+00 5.408051757812500000e+02 -1.072500000000000000e+02 5.375000000000000000e+01
5.600000000000000000e+01 4.576153846153846985e+02 3.252129821777343750e+02 -1.540863037109375000e+00 0.000000000000000000e+00 0.000000000000000000e+00 2.266510986328125000e+03 1.028364062309265137e+00 4.000000000000000000e+00 6.082765502929687500e+02 -1.062500000000000000e+02 5.375000000000000000e+01
3.600000000000000000e+01 4.554307692307692150e+02 3.177113037109375000e+02 -1.702087402343750000e+00 0.000000000000000000e+00 0.000000000000000000e+00 2.251033691406250000e+03 2.226233482360839844e+00 3.000000000000000000e+00 5.193034057617187500e+02 -1.057500000000000000e+02 5.375000000000000000e+01
3.400000000000000000e+01 4.723692307692305121e+02 2.369646759033203125e+02 -1.933349609375000000e+00 0.000000000000000000e+00 2.352941185235977173e-01 2.230100585937500000e+03 2.042297363281250000e+00 3.000000000000000000e+00 4.790211486816406250e+02 -1.047500000000000000e+02 5.375000000000000000e+01
4.000000000000000000e+01 4.828923076923081226e+02 1.974261474609375000e+02 -1.912231445312500000e+00 0.000000000000000000e+00 0.000000000000000000e+00 2.234666992187500000e+03 2.338266849517822266e+00 3.000000000000000000e+00 4.221292724609375000e+02 -1.042500000000000000e+02 5.375000000000000000e+01
5.100000000000000000e+01 4.747999999999998408e+02 1.810058746337890625e+02 -1.891143798828125000e+00 0.000000000000000000e+00 0.000000000000000000e+00 2.239233398437500000e+03 2.069356679916381836e+00 4.000000000000000000e+00 3.505427856445312500e+02 -1.037500000000000000e+02 5.375000000000000000e+01
3.600000000000000000e+01 4.779999999999999432e+02 1.824347076416015625e+02 -1.870025634765625000e+00 0.000000000000000000e+00 2.941176593303680420e-01 2.243799804687500000e+03 2.080545425415039062e+00 3.000000000000000000e+00 3.029854736328125000e+02 -1.032500000000000000e+02 5.375000000000000000e+01
3.100000000000000000e+01 4.710000000000003979e+02 2.015581207275390625e+02 -1.805938720703125000e+00 0.000000000000000000e+00 0.000000000000000000e+00 2.252499267578125000e+03 8.484027981758117676e-01 3.000000000000000000e+00 2.669806213378906250e+02 -1.027500000000000000e+02 5.375000000000000000e+01
4.800000000000000000e+01 4.672076923076922981e+02 2.187535552978515625e+02 -1.727508544921875000e+00 0.000000000000000000e+00 0.000000000000000000e+00 2.262576171875000000e+03 8.422078490257263184e-01 4.000000000000000000e+00 2.645202636718750000e+02 -1.022500000000000000e+02 5.375000000000000000e+01
3.500000000000000000e+01 4.654769230769232990e+02 2.197788696289062500e+02 -1.649078369140625000e+00 0.000000000000000000e+00 5.882353186607360840e-01 2.272653320312500000e+03 8.310616016387939453e-01 3.000000000000000000e+00 2.642249450683593750e+02 -1.017500000000000000e+02 5.375000000000000000e+01
2.500000000000000000e+01 4.639692307692305917e+02 2.141559906005859375e+02 -1.570648193359375000e+00 0.000000000000000000e+00 5.882353186607360840e-01 2.282730224609375000e+03 3.041016101837158203e+00 3.000000000000000000e+00 2.642946777343750000e+02 -1.012500000000000000e+02 5.375000000000000000e+01
4.400000000000000000e+01 2.392853846153846462e+03 6.229363403320312500e+02 2.212921142578125000e+00 0.000000000000000000e+00 0.000000000000000000e+00 1.495120727539062500e+03 1.889861822128295898e+00 3.000000000000000000e+00 4.260214538574218750e+02 -1.297500000000000000e+02 5.425000000000000000e+01
3.100000000000000000e+01 2.011284615384615790e+03 6.201161499023437500e+02 1.127807617187500000e+00 0.000000000000000000e+00 2.352941185235977173e-01 1.256769042968750000e+03 1.168316125869750977e+00 3.000000000000000000e+00 8.102382202148437500e+02 -1.292500000000000000e+02 5.425000000000000000e+01
5.500000000000000000e+01 1.169292307692307304e+03 5.365327148437500000e+02 -4.027099609375000000e-01 0.000000000000000000e+00 2.352941185235977173e-01 1.184128417968750000e+03 1.106135249137878418e+00 4.000000000000000000e+00 1.058787597656250000e+03 -1.277500000000000000e+02 5.425000000000000000e+01
5.900000000000000000e+01 8.980230769230765873e+02 4.331143493652343750e+02 -7.785949707031250000e-01 9.999999776482582092e-03 0.000000000000000000e+00 1.186514160156250000e+03 1.683061242103576660e+00 4.000000000000000000e+00 1.058673339843750000e+03 -1.272500000000000000e+02 5.425000000000000000e+01
4.600000000000000000e+01 4.532153846153847212e+02 2.537012023925781250e+02 -1.503295898437500000e+00 0.000000000000000000e+00 0.000000000000000000e+00 1.273469360351562500e+03 1.864788532257080078e+00 4.000000000000000000e+00 8.295634155273437500e+02 -1.257500000000000000e+02 5.425000000000000000e+01
7.100000000000000000e+01 5.142846153846152220e+02 2.907882080078125000e+02 -1.601562500000000000e+00 9.999999776482582092e-03 4.705882370471954346e-01 1.327718627929687500e+03 1.883955955505371094e+00 4.000000000000000000e+00 1.142449218750000000e+03 -1.247500000000000000e+02 5.425000000000000000e+01
5.100000000000000000e+01 5.070307692307694083e+02 3.192312316894531250e+02 -1.623229980468750000e+00 0.000000000000000000e+00 0.000000000000000000e+00 1.354577514648437500e+03 1.934299349784851074e+00 4.000000000000000000e+00 8.430039672851562500e+02 -1.242500000000000000e+02 5.425000000000000000e+01
5.800000000000000000e+01 5.645769230769230944e+02 3.434206848144531250e+02 -1.644866943359375000e+00 0.000000000000000000e+00 2.352941185235977173e-01 1.381436401367187500e+03 1.940465211868286133e+00 4.000000000000000000e+00 8.063142089843750000e+02 -1.237500000000000000e+02 5.425000000000000000e+01
6.100000000000000000e+01 8.194769230769234127e+02 3.701127319335937500e+02 -1.466522216796875000e+00 0.000000000000000000e+00 2.352941185235977173e-01 1.390847412109375000e+03 7.928029298782348633e-01 4.000000000000000000e+00 8.196701049804687500e+02 -1.222500000000000000e+02 5.425000000000000000e+01
3.600000000000000000e+01 8.633846153846154721e+02 3.642395629882812500e+02 -1.391418457031250000e+00 0.000000000000000000e+00 0.000000000000000000e+00 1.401932373046875000e+03 1.157819032669067383e+00 3.000000000000000000e+00 8.365414428710937500e+02 -1.217500000000000000e+02 5.425000000000000000e+01
5.600000000000000000e+01 8.133076923076919229e+02 3.253720092773437500e+02 -1.147247314453125000e+00 9.999999776482582092e-03 0.000000000000000000e+00 1.471790039062500000e+03 8.663640022277832031e-01 4.000000000000000000e+00 1.584596801757812500e+03 -1.207500000000000000e+02 5.425000000000000000e+01
6.400000000000000000e+01 7.602230769230767464e+02 2.768089294433593750e+02 -1.025177001953125000e+00 9.999999776482582092e-03 0.000000000000000000e+00 1.506718994140625000e+03 1.555270791053771973e+00 4.000000000000000000e+00 1.312525268554687500e+03 -1.202500000000000000e+02 5.425000000000000000e+01
6.000000000000000000e+01 6.871461538461536520e+02 2.587759399414062500e+02 -9.435729980468750000e-01 9.999999776482582092e-03 0.000000000000000000e+00 1.534492553710937500e+03 1.610280632972717285e+00 4.000000000000000000e+00 1.446464111328125000e+03 -1.197500000000000000e+02 5.425000000000000000e+01
6.500000000000000000e+01 5.978307692307693060e+02 2.528705749511718750e+02 -9.024963378906250000e-01 0.000000000000000000e+00 0.000000000000000000e+00 1.555110961914062500e+03 1.736785531044006348e+00 4.000000000000000000e+00 1.183712890625000000e+03 -1.192500000000000000e+02 5.425000000000000000e+01
5.400000000000000000e+01 5.350153846153845052e+02 2.548098907470703125e+02 -8.614196777343750000e-01 0.000000000000000000e+00 0.000000000000000000e+00 1.575729248046875000e+03 1.865986943244934082e+00 4.000000000000000000e+00 1.057339721679687500e+03 -1.187500000000000000e+02 5.425000000000000000e+01
4.500000000000000000e+01 5.578615384615380890e+02 2.548353424072265625e+02 -8.203125000000000000e-01 9.999999776482582092e-03 0.000000000000000000e+00 1.596347656250000000e+03 1.874262452125549316e+00 4.000000000000000000e+00 1.192013305664062500e+03 -1.182500000000000000e+02 5.425000000000000000e+01
7.200000000000000000e+01 5.879384615384616382e+02 2.404121551513671875e+02 -7.296752929687500000e-01 0.000000000000000000e+00 0.000000000000000000e+00 1.641226684570312500e+03 1.904928922653198242e+00 4.000000000000000000e+00 1.176442749023437500e+03 -1.177500000000000000e+02 5.425000000000000000e+01
5.300000000000000000e+01 5.736461538461542204e+02 2.154381103515625000e+02 -6.225280761718750000e-01 0.000000000000000000e+00 0.000000000000000000e+00 1.694192626953125000e+03 1.774364352226257324e+00 4.000000000000000000e+00 9.970269775390625000e+02 -1.172500000000000000e+02 5.425000000000000000e+01
6.900000000000000000e+01 5.689615384615383391e+02 1.926063079833984375e+02 -5.153808593750000000e-01 0.000000000000000000e+00 4.117647111415863037e-01 1.747158569335937500e+03 1.988475799560546875e+00 4.000000000000000000e+00 9.369700927734375000e+02 -1.167500000000000000e+02 5.425000000000000000e+01
5.500000000000000000e+01 5.593923076923077815e+02 1.694429931640625000e+02 -4.082031250000000000e-01 0.000000000000000000e+00 0.000000000000000000e+00 1.800124511718750000e+03 1.963327646255493164e+00 4.000000000000000000e+00 7.964678955078125000e+02 -1.162500000000000000e+02 5.425000000000000000e+01
6.200000000000000000e+01 5.522692307692307168e+02 1.530361938476562500e+02 -2.716369628906250000e-01 0.000000000000000000e+00 0.000000000000000000e+00 1.866480468750000000e+03 1.315098643302917480e+00 4.000000000000000000e+00 8.367655639648437500e+02 -1.157500000000000000e+02 5.425000000000000000e+01
2.800000000000000000e+01 5.242384615384614790e+02 1.552799530029296875e+02 -1.350708007812500000e-01 0.000000000000000000e+00 5.882352963089942932e-02 1.932836425781250000e+03 1.951416134834289551e+00 3.000000000000000000e+00 7.349612426757812500e+02 -1.152500000000000000e+02 5.425000000000000000e+01
1.500000000000000000e+01 4.739230769230770761e+02 1.623808135986328125e+02 1.495361328125000000e-03 0.000000000000000000e+00 0.000000000000000000e+00 1.999192260742187500e+03 3.113248109817504883e+00 1.000000000000000000e+00 6.929471435546875000e+02 -1.147500000000000000e+02 5.425000000000000000e+01
4.000000000000000000e+00 4.666615384615386120e+02 1.705294342041015625e+02 2.985229492187500000e-01 0.000000000000000000e+00 0.000000000000000000e+00 2.225949462890625000e+03 3.198365211486816406e+00 1.000000000000000000e+00 6.735417480468750000e+02 -1.127500000000000000e+02 5.425000000000000000e+01
2.500000000000000000e+01 4.494923076923077474e+02 1.552350921630859375e+02 3.103027343750000000e-01 0.000000000000000000e+00 1.764705926179885864e-01 2.265588378906250000e+03 3.196536302566528320e+00 3.000000000000000000e+00 6.750285644531250000e+02 -1.122500000000000000e+02 5.425000000000000000e+01
3.900000000000000000e+01 4.337461538461537884e+02 1.996084136962890625e+02 -2.127990722656250000e-01 0.000000000000000000e+00 0.000000000000000000e+00 2.329022460937500000e+03 3.089231491088867188e+00 3.000000000000000000e+00 5.469545288085937500e+02 -1.097500000000000000e+02 5.425000000000000000e+01
5.000000000000000000e+00 4.298615384615382595e+02 1.979196014404296875e+02 -4.441833496093750000e-01 0.000000000000000000e+00 5.882353186607360840e-01 2.319177734375000000e+03 3.161396980285644531e+00 1.000000000000000000e+00 5.112251586914062500e+02 -1.092500000000000000e+02 5.425000000000000000e+01
2.500000000000000000e+01 4.218461538461539249e+02 2.090451049804687500e+02 -9.712829589843750000e-01 0.000000000000000000e+00 2.352941185235977173e-01 2.285148193359375000e+03 1.442680120468139648e+00 3.000000000000000000e+00 4.675541076660156250e+02 -1.082500000000000000e+02 5.425000000000000000e+01
5.400000000000000000e+01 4.252384615384613653e+02 2.288722381591796875e+02 -1.267028808593750000e+00 0.000000000000000000e+00 0.000000000000000000e+00 2.260963378906250000e+03 1.873587489128112793e+00 4.000000000000000000e+00 4.789421691894531250e+02 -1.077500000000000000e+02 5.425000000000000000e+01
6.600000000000000000e+01 4.662307692307694538e+02 3.304971618652343750e+02 -1.818267822265625000e+00 0.000000000000000000e+00 2.941176593303680420e-01 2.215663330078125000e+03 1.989332556724548340e+00 4.000000000000000000e+00 5.367565917968750000e+02 -1.067500000000000000e+02 5.425000000000000000e+01
5.600000000000000000e+01 4.954076923076925141e+02 3.297671508789062500e+02 -2.222747802734375000e+00 9.999999776482582092e-03 0.000000000000000000e+00 2.179942871093750000e+03 1.951632738113403320e+00 4.000000000000000000e+00 5.831254882812500000e+02 -1.052500000000000000e+02 5.425000000000000000e+01
4.000000000000000000e+01 5.028307692307688512e+02 2.848069152832031250e+02 -2.273956298828125000e+00 9.999999776482582092e-03 0.000000000000000000e+00 2.176594238281250000e+03 1.946590304374694824e+00 3.000000000000000000e+00 6.294907226562500000e+02 -1.047500000000000000e+02 5.425000000000000000e+01
3.800000000000000000e+01 5.070538461538460524e+02 2.427751770019531250e+02 -2.241577148437500000e+00 9.999999776482582092e-03 0.000000000000000000e+00 2.181803955078125000e+03 1.966237902641296387e+00 3.000000000000000000e+00 4.366341857910156250e+02 -1.042500000000000000e+02 5.425000000000000000e+01
4.500000000000000000e+01 4.910923076923075428e+02 2.105333862304687500e+02 -2.209167480468750000e+00 0.000000000000000000e+00 5.882353186607360840e-01 2.187013671875000000e+03 2.011622190475463867e+00 4.000000000000000000e+00 3.793629150390625000e+02 -1.037500000000000000e+02 5.425000000000000000e+01
3.200000000000000000e+01 4.963230769230768828e+02 1.980016632080078125e+02 -2.176788330078125000e+00 9.999999776482582092e-03 2.941176593303680420e-01 2.192223144531250000e+03 2.030060768127441406e+00 3.000000000000000000e+00 3.382768859863281250e+02 -1.032500000000000000e+02 5.425000000000000000e+01
3.200000000000000000e+01 4.868000000000000682e+02 2.070477905273437500e+02 -2.121246337890625000e+00 0.000000000000000000e+00 5.882353186607360840e-01 2.198961669921875000e+03 1.950233221054077148e+00 3.000000000000000000e+00 2.889776916503906250e+02 -1.027500000000000000e+02 5.425000000000000000e+01
4.200000000000000000e+01 4.839846153846155516e+02 2.196076202392578125e+02 -2.058013916015625000e+00 0.000000000000000000e+00 0.000000000000000000e+00 2.206209716796875000e+03 2.049456596374511719e+00 3.000000000000000000e+00 2.831292419433593750e+02 -1.022500000000000000e+02 5.425000000000000000e+01
5.100000000000000000e+01 1.586199999999999591e+03 6.250634765625000000e+02 -1.495361328125000000e-02 0.000000000000000000e+00 0.000000000000000000e+00 1.154341186523437500e+03 9.305621981620788574e-01 4.000000000000000000e+00 8.777457885742187500e+02 -1.292500000000000000e+02 5.475000000000000000e+01
5.200000000000000000e+01 1.268723076923076405e+03 6.026390380859375000e+02 -5.488586425781250000e-01 0.000000000000000000e+00 0.000000000000000000e+00 1.129641601562500000e+03 7.736005783081054688e-01 4.000000000000000000e+00 6.103237915039062500e+02 -1.287500000000000000e+02 5.475000000000000000e+01
4.700000000000000000e+01 1.009046153846153970e+03 5.694449462890625000e+02 -1.082733154296875000e+00 0.000000000000000000e+00 5.882352963089942932e-02 1.104942138671875000e+03 1.107493281364440918e+00 4.000000000000000000e+00 4.039832458496093750e+02 -1.282500000000000000e+02 5.475000000000000000e+01
6.100000000000000000e+01 8.459769230769231854e+02 4.634009704589843750e+02 -1.616607666015625000e+00 2.736051976680755615e-01 5.882353186607360840e-01 1.080242553710937500e+03 1.634582757949829102e+00 4.000000000000000000e+00 1.353000732421875000e+03 -1.277500000000000000e+02 5.475000000000000000e+01
6.200000000000000000e+01 6.219538461538460297e+02 3.129010009765625000e+02 -1.966461181640625000e+00 9.999999776482582092e-03 0.000000000000000000e+00 1.086026367187500000e+03 1.304059147834777832e+00 4.000000000000000000e+00 9.856036376953125000e+02 -1.272500000000000000e+02 5.475000000000000000e+01
5.400000000000000000e+01 5.261076923076921048e+02 2.660602722167968750e+02 -2.132324218750000000e+00 9.999999776482582092e-03 0.000000000000000000e+00 1.122293579101562500e+03 1.709089279174804688e+00 4.000000000000000000e+00 1.310877075195312500e+03 -1.267500000000000000e+02 5.475000000000000000e+01
7.300000000000000000e+01 4.891692307692307509e+02 2.552425842285156250e+02 -2.298187255859375000e+00 0.000000000000000000e+00 3.529411852359771729e-01 1.158560668945312500e+03 1.770827889442443848e+00 4.000000000000000000e+00 9.407410888671875000e+02 -1.262500000000000000e+02 5.475000000000000000e+01
6.300000000000000000e+01 4.745153846153847894e+02 2.520854187011718750e+02 -2.464050292968750000e+00 0.000000000000000000e+00 2.941176593303680420e-01 1.194827880859375000e+03 9.127161502838134766e-01 4.000000000000000000e+00 9.897807617187500000e+02 -1.257500000000000000e+02 5.475000000000000000e+01
6.000000000000000000e+01 5.186307692307690331e+02 2.992244567871093750e+02 -2.348815917968750000e+00 0.000000000000000000e+00 3.529411852359771729e-01 1.267526123046875000e+03 9.186529517173767090e-01 4.000000000000000000e+00 7.634437866210937500e+02 -1.247500000000000000e+02 5.475000000000000000e+01
6.000000000000000000e+01 5.702692307692306031e+02 3.357683105468750000e+02 -2.259246826171875000e+00 0.000000000000000000e+00 0.000000000000000000e+00 1.303887084960937500e+03 1.328642010688781738e+00 4.000000000000000000e+00 8.441470947265625000e+02 -1.242500000000000000e+02 5.475000000000000000e+01
4.000000000000000000e+01 6.252769230769229125e+02 3.616957092285156250e+02 -2.169708251953125000e+00 0.000000000000000000e+00 2.941176593303680420e-01 1.340247924804687500e+03 1.851057648658752441e+00 3.000000000000000000e+00 9.062500610351562500e+02 -1.237500000000000000e+02 5.475000000000000000e+01
7.200000000000000000e+01 6.945846153846154039e+02 3.760482788085937500e+02 -1.976501464843750000e+00 0.000000000000000000e+00 0.000000000000000000e+00 1.370020996093750000e+03 1.191948533058166504e+00 4.000000000000000000e+00 9.717789916992187500e+02 -1.232500000000000000e+02 5.475000000000000000e+01
5.400000000000000000e+01 7.767307692307688285e+02 3.783683776855468750e+02 -1.783264160156250000e+00 0.000000000000000000e+00 0.000000000000000000e+00 1.399794067382812500e+03 7.583245635032653809e-01 4.000000000000000000e+00 8.185990600585937500e+02 -1.227500000000000000e+02 5.475000000000000000e+01
6.200000000000000000e+01 8.430769230769227534e+02 3.761884460449218750e+02 -1.590057373046875000e+00 9.999999776482582092e-03 5.294117927551269531e-01 1.429567016601562500e+03 7.199212908744812012e-01 4.000000000000000000e+00 1.100285278320312500e+03 -1.222500000000000000e+02 5.475000000000000000e+01
5.600000000000000000e+01 8.415615384615385892e+02 3.664247436523437500e+02 -1.403228759765625000e+00 0.000000000000000000e+00 0.000000000000000000e+00 1.463127197265625000e+03 6.613231897354125977e-01 4.000000000000000000e+00 1.137906250000000000e+03 -1.217500000000000000e+02 5.475000000000000000e+01
5.800000000000000000e+01 8.027230769230770875e+02 3.378570556640625000e+02 -1.235626220703125000e+00 0.000000000000000000e+00 0.000000000000000000e+00 1.508048706054687500e+03 1.276288270950317383e+00 4.000000000000000000e+00 1.063778686523437500e+03 -1.212500000000000000e+02 5.475000000000000000e+01
5.800000000000000000e+01 7.450384615384616609e+02 2.832056884765625000e+02 -1.067993164062500000e+00 1.790191978216171265e-01 0.000000000000000000e+00 1.552970214843750000e+03 1.629390001296997070e+00 4.000000000000000000e+00 1.230170532226562500e+03 -1.207500000000000000e+02 5.475000000000000000e+01
6.200000000000000000e+01 6.571615384615386120e+02 2.348022766113281250e+02 -9.003906250000000000e-01 9.999999776482582092e-03 5.882353186607360840e-01 1.597891845703125000e+03 1.741160035133361816e+00 4.000000000000000000e+00 1.186976074218750000e+03 -1.202500000000000000e+02 5.475000000000000000e+01
6.400000000000000000e+01 5.665384615384616609e+02 2.187722625732421875e+02 -7.917480468750000000e-01 0.000000000000000000e+00 1.176470592617988586e-01 1.633279907226562500e+03 1.154483675956726074e+00 4.000000000000000000e+00 9.322875976562500000e+02 -1.197500000000000000e+02 5.475000000000000000e+01
6.100000000000000000e+01 5.293230769230773376e+02 2.160241241455078125e+02 -7.420959472656250000e-01 0.000000000000000000e+00 0.000000000000000000e+00 1.659134521484375000e+03 8.494231700897216797e-01 4.000000000000000000e+00 8.362858886718750000e+02 -1.192500000000000000e+02 5.475000000000000000e+01
4.800000000000000000e+01 5.066230769230768374e+02 2.179339294433593750e+02 -6.924438476562500000e-01 0.000000000000000000e+00 0.000000000000000000e+00 1.684989135742187500e+03 9.390492439270019531e-01 4.000000000000000000e+00 7.976267700195312500e+02 -1.187500000000000000e+02 5.475000000000000000e+01
5.600000000000000000e+01 5.143769230769231626e+02 2.212828216552734375e+02 -6.427917480468750000e-01 0.000000000000000000e+00 0.000000000000000000e+00 1.710843750000000000e+03 1.389008402824401855e+00 4.000000000000000000e+00 8.112744750976562500e+02 -1.182500000000000000e+02 5.475000000000000000e+01
5.700000000000000000e+01 5.377384615384611379e+02 2.184209899902343750e+02 -5.738830566406250000e-01 0.000000000000000000e+00 0.000000000000000000e+00 1.751710083007812500e+03 8.188912272453308105e-01 4.000000000000000000e+00 7.382199096679687500e+02 -1.177500000000000000e+02 5.475000000000000000e+01
6.400000000000000000e+01 5.277307692307693969e+02 1.811452331542968750e+02 -4.231872558593750000e-01 0.000000000000000000e+00 0.000000000000000000e+00 1.843450683593750000e+03 1.197006940841674805e+00 4.000000000000000000e+00 7.702455444335937500e+02 -1.167500000000000000e+02 5.475000000000000000e+01
2.100000000000000000e+01 5.444153846153849372e+02 1.648798065185546875e+02 -3.478393554687500000e-01 0.000000000000000000e+00 0.000000000000000000e+00 1.889320922851562500e+03 1.916985392570495605e+00 3.000000000000000000e+00 9.257758178710937500e+02 -1.162500000000000000e+02 5.475000000000000000e+01
3.200000000000000000e+01 5.450538461538461661e+02 1.686778717041015625e+02 -1.788940429687500000e-01 9.999999776482582092e-03 0.000000000000000000e+00 1.996572021484375000e+03 1.855414390563964844e+00 3.000000000000000000e+00 1.087904541015625000e+03 -1.152500000000000000e+02 5.475000000000000000e+01
3.400000000000000000e+01 5.034076923076924572e+02 1.739291839599609375e+02 -9.442138671875000000e-02 0.000000000000000000e+00 1.176470592617988586e-01 2.050197509765625000e+03 1.282096385955810547e+00 3.000000000000000000e+00 7.535894165039062500e+02 -1.147500000000000000e+02 5.475000000000000000e+01
2.000000000000000000e+01 4.927076923076925254e+02 1.741044464111328125e+02 -2.798461914062500000e-02 0.000000000000000000e+00 0.000000000000000000e+00 2.100729736328125000e+03 2.195562601089477539e+00 3.000000000000000000e+00 6.065316162109375000e+02 -1.142500000000000000e+02 5.475000000000000000e+01
5.500000000000000000e+01 4.991076923076922753e+02 1.625764770507812500e+02 -1.565551757812500000e-02 0.000000000000000000e+00 0.000000000000000000e+00 2.141981689453125000e+03 8.475069999694824219e-01 4.000000000000000000e+00 6.839943847656250000e+02 -1.137500000000000000e+02 5.475000000000000000e+01
6.300000000000000000e+01 4.656461538461536520e+02 1.212235488891601562e+02 8.972167968750000000e-03 0.000000000000000000e+00 5.882352963089942932e-02 2.224485595703125000e+03 3.129342794418334961e+00 4.000000000000000000e+00 5.936559448242187500e+02 -1.127500000000000000e+02 5.475000000000000000e+01
5.200000000000000000e+01 4.661384615384615699e+02 1.064307098388671875e+02 -1.007995605468750000e-01 0.000000000000000000e+00 0.000000000000000000e+00 2.266419433593750000e+03 3.034026145935058594e+00 4.000000000000000000e+00 6.084114379882812500e+02 -1.117500000000000000e+02 5.475000000000000000e+01
6.500000000000000000e+01 4.615153846153847894e+02 1.335354461669921875e+02 -1.781005859375000000e-01 0.000000000000000000e+00 0.000000000000000000e+00 2.280624511718750000e+03 9.539394378662109375e-01 4.000000000000000000e+00 6.267232055664062500e+02 -1.112500000000000000e+02 5.475000000000000000e+01
3.800000000000000000e+01 4.425461538461536861e+02 1.652392120361328125e+02 -2.554016113281250000e-01 0.000000000000000000e+00 0.000000000000000000e+00 2.294829589843750000e+03 1.412246704101562500e+00 3.000000000000000000e+00 6.421318969726562500e+02 -1.107500000000000000e+02 5.475000000000000000e+01
4.000000000000000000e+01 4.375615384615383618e+02 1.863352966308593750e+02 -9.489746093750000000e-01 0.000000000000000000e+00 0.000000000000000000e+00 2.257318115234375000e+03 1.983464479446411133e+00 3.000000000000000000e+00 6.463036499023437500e+02 -1.092500000000000000e+02 5.475000000000000000e+01
3.600000000000000000e+01 4.415461538461539703e+02 1.971849517822265625e+02 -1.194152832031250000e+00 9.999999776482582092e-03 0.000000000000000000e+00 2.242386230468750000e+03 1.513571977615356445e+00 3.000000000000000000e+00 7.343743896484375000e+02 -1.087500000000000000e+02 5.475000000000000000e+01
3.400000000000000000e+01 4.307923076923078725e+02 2.088685607910156250e+02 -1.475128173828125000e+00 0.000000000000000000e+00 0.000000000000000000e+00 2.218310302734375000e+03 1.794139027595520020e+00 3.000000000000000000e+00 4.787547302246093750e+02 -1.082500000000000000e+02 5.475000000000000000e+01
5.000000000000000000e+01 4.750923076923075428e+02 3.047914123535156250e+02 -2.277740478515625000e+00 9.999999776482582092e-03 5.882353186607360840e-01 2.149018066406250000e+03 1.971734881401062012e+00 4.000000000000000000e+00 4.757207641601562500e+02 -1.067500000000000000e+02 5.475000000000000000e+01
3.400000000000000000e+01 4.975153846153842778e+02 3.226930541992187500e+02 -2.397766113281250000e+00 9.999999776482582092e-03 0.000000000000000000e+00 2.136686035156250000e+03 1.945840716361999512e+00 3.000000000000000000e+00 5.020732727050781250e+02 -1.062500000000000000e+02 5.475000000000000000e+01
5.500000000000000000e+01 5.109000000000005457e+02 3.166711120605468750e+02 -2.517761230468750000e+00 9.999999776482582092e-03 2.941176593303680420e-01 2.124354003906250000e+03 1.929638981819152832e+00 4.000000000000000000e+00 4.819633483886718750e+02 -1.057500000000000000e+02 5.475000000000000000e+01
7.000000000000000000e+01 5.186692307692309214e+02 3.004679565429687500e+02 -2.637756347656250000e+00 9.999999776482582092e-03 0.000000000000000000e+00 2.112021728515625000e+03 1.923698902130126953e+00 4.000000000000000000e+00 4.507072448730468750e+02 -1.052500000000000000e+02 5.475000000000000000e+01
6.800000000000000000e+01 5.109461538461539476e+02 2.848061218261718750e+02 -2.689270019531250000e+00 9.999999776482582092e-03 0.000000000000000000e+00 2.107184082031250000e+03 1.920561075210571289e+00 4.000000000000000000e+00 4.405871887207031250e+02 -1.047500000000000000e+02 5.475000000000000000e+01
7.000000000000000000e+01 5.191384615384612289e+02 2.701660766601562500e+02 -2.672302246093750000e+00 1.423114687204360962e-01 2.941176593303680420e-01 2.109841064453125000e+03 1.927935600280761719e+00 4.000000000000000000e+00 6.447095336914062500e+02 -1.042500000000000000e+02 5.475000000000000000e+01
4.500000000000000000e+01 5.082769230769227988e+02 2.440824584960937500e+02 -2.638366699218750000e+00 9.999999776482582092e-03 5.882353186607360840e-01 2.115154785156250000e+03 1.991220355033874512e+00 4.000000000000000000e+00 3.310394897460937500e+02 -1.032500000000000000e+02 5.475000000000000000e+01
6.100000000000000000e+01 5.031230769230767237e+02 2.422163085937500000e+02 -2.611175537109375000e+00 9.999999776482582092e-03 0.000000000000000000e+00 2.118689697265625000e+03 2.020468950271606445e+00 4.000000000000000000e+00 3.347200622558593750e+02 -1.027500000000000000e+02 5.475000000000000000e+01
6.400000000000000000e+01 4.927923076923077019e+02 2.438147430419921875e+02 -2.580627441406250000e+00 9.999999776482582092e-03 0.000000000000000000e+00 2.122517089843750000e+03 2.038634538650512695e+00 4.000000000000000000e+00 3.163276062011718750e+02 -1.022500000000000000e+02 5.475000000000000000e+01
4.500000000000000000e+01 4.888692307692309100e+02 2.427503051757812500e+02 -2.588104248046875000e+00 9.999999776482582092e-03 2.941176593303680420e-01 2.126924804687500000e+03 1.977965831756591797e+00 4.000000000000000000e+00 3.119559631347656250e+02 -1.007500000000000000e+02 5.475000000000000000e+01
5.700000000000000000e+01 2.102892307692307895e+03 6.739288330078125000e+02 1.710144042968750000e+00 0.000000000000000000e+00 0.000000000000000000e+00 1.534573608398437500e+03 2.016182899475097656e+00 4.000000000000000000e+00 1.348229370117187500e+02 -1.307500000000000000e+02 5.525000000000000000e+01
2.700000000000000000e+01 1.923007692307692651e+03 6.637249145507812500e+02 7.272338867187500000e-01 0.000000000000000000e+00 0.000000000000000000e+00 1.368602539062500000e+03 8.702622652053833008e-01 3.000000000000000000e+00 7.473545532226562500e+02 -1.302500000000000000e+02 5.525000000000000000e+01
2.700000000000000000e+01 1.368492307692307804e+03 6.163704223632812500e+02 -1.136779785156250000e+00 0.000000000000000000e+00 0.000000000000000000e+00 1.070240722656250000e+03 1.733820080757141113e+00 3.000000000000000000e+00 1.124380004882812500e+03 -1.292500000000000000e+02 5.525000000000000000e+01
4.700000000000000000e+01 1.025538461538461434e+03 5.741204833984375000e+02 -1.712432861328125000e+00 0.000000000000000000e+00 2.352941185235977173e-01 1.038591918945312500e+03 1.433914780616760254e+00 4.000000000000000000e+00 1.161499389648437500e+03 -1.287500000000000000e+02 5.525000000000000000e+01
5.800000000000000000e+01 7.901923076923077360e+02 4.959718322753906250e+02 -2.288055419921875000e+00 0.000000000000000000e+00 4.117647111415863037e-01 1.006943054199218750e+03 1.813161134719848633e+00 4.000000000000000000e+00 1.055492187500000000e+03 -1.282500000000000000e+02 5.525000000000000000e+01
6.600000000000000000e+01 6.077230769230768601e+02 3.708496704101562500e+02 -2.863708496093750000e+00 0.000000000000000000e+00 2.941176593303680420e-01 9.752941894531250000e+02 1.802787065505981445e+00 4.000000000000000000e+00 4.755865478515625000e+02 -1.277500000000000000e+02 5.525000000000000000e+01
5.300000000000000000e+01 5.357000000000001592e+02 2.815041809082031250e+02 -3.195068359375000000e+00 9.999999776482582092e-03 0.000000000000000000e+00 9.813533935546875000e+02 1.605715990066528320e+00 4.000000000000000000e+00 1.064070678710937500e+03 -1.272500000000000000e+02 5.525000000000000000e+01
4.900000000000000000e+01 4.911769230769231740e+02 2.627610473632812500e+02 -3.282196044921875000e+00 1.218200922012329102e-01 0.000000000000000000e+00 1.025120605468750000e+03 8.929679989814758301e-01 4.000000000000000000e+00 1.226562744140625000e+03 -1.267500000000000000e+02 5.525000000000000000e+01
6.200000000000000000e+01 4.924615384615385096e+02 2.589441528320312500e+02 -3.369293212890625000e+00 0.000000000000000000e+00 0.000000000000000000e+00 1.068887939453125000e+03 1.624248147010803223e+00 4.000000000000000000e+00 1.016253295898437500e+03 -1.262500000000000000e+02 5.525000000000000000e+01
5.200000000000000000e+01 5.069384615384615813e+02 2.866053466796875000e+02 -3.327758789062500000e+00 0.000000000000000000e+00 0.000000000000000000e+00 1.157739746093750000e+03 1.090529918670654297e+00 4.000000000000000000e+00 8.985104980468750000e+02 -1.252500000000000000e+02 5.525000000000000000e+01
6.700000000000000000e+01 5.473538461538460069e+02 3.314261779785156250e+02 -3.127166748046875000e+00 1.279969662427902222e-01 0.000000000000000000e+00 1.203263427734375000e+03 1.674872040748596191e+00 4.000000000000000000e+00 1.105241455078125000e+03 -1.247500000000000000e+02 5.525000000000000000e+01
4.500000000000000000e+01 6.095615384615384755e+02 3.667095642089843750e+02 -2.926605224609375000e+00 9.999999776482582092e-03 0.000000000000000000e+00 1.248787109375000000e+03 1.699831366539001465e+00 4.000000000000000000e+00 1.017873413085937500e+03 -1.242500000000000000e+02 5.525000000000000000e+01
5.700000000000000000e+01 6.487230769230772012e+02 3.834287414550781250e+02 -2.726043701171875000e+00 9.999999776482582092e-03 0.000000000000000000e+00 1.294310791015625000e+03 1.764489769935607910e+00 4.000000000000000000e+00 1.088076782226562500e+03 -1.237500000000000000e+02 5.525000000000000000e+01
5.200000000000000000e+01 8.397615384615387484e+02 3.897188415527343750e+02 -2.066070556640625000e+00 9.999999776482582092e-03 3.529411852359771729e-01 1.409979980468750000e+03 1.001330494880676270e+00 4.000000000000000000e+00 1.304196533203125000e+03 -1.227500000000000000e+02 5.525000000000000000e+01
5.200000000000000000e+01 8.244384615384618655e+02 3.780263977050781250e+02 -1.736083984375000000e+00 9.999999776482582092e-03 5.882353186607360840e-01 1.467814575195312500e+03 6.722534298896789551e-01 4.000000000000000000e+00 1.393608276367187500e+03 -1.222500000000000000e+02 5.525000000000000000e+01
6.300000000000000000e+01 7.775615384615382482e+02 3.507598876953125000e+02 -1.437469482421875000e+00 9.999999776482582092e-03 2.941176593303680420e-01 1.524376342773437500e+03 1.691436529159545898e+00 4.000000000000000000e+00 1.240244018554687500e+03 -1.217500000000000000e+02 5.525000000000000000e+01
4.900000000000000000e+01 7.103846153846156994e+02 3.032727355957031250e+02 -1.232879638671875000e+00 0.000000000000000000e+00 0.000000000000000000e+00 1.577119140625000000e+03 1.703302383422851562e+00 4.000000000000000000e+00 1.118631591796875000e+03 -1.212500000000000000e+02 5.525000000000000000e+01
6.000000000000000000e+01 6.349461538461538339e+02 2.475928955078125000e+02 -1.028320312500000000e+00 0.000000000000000000e+00 5.882353186607360840e-01 1.629862060546875000e+03 1.823578834533691406e+00 4.000000000000000000e+00 1.070211059570312500e+03 -1.207500000000000000e+02 5.525000000000000000e+01
5.300000000000000000e+01 5.701230769230767237e+02 2.130297393798828125e+02 -8.237609863281250000e-01 0.000000000000000000e+00 0.000000000000000000e+00 1.682604980468750000e+03 1.291976451873779297e+00 4.000000000000000000e+00 8.943986816406250000e+02 -1.202500000000000000e+02 5.525000000000000000e+01
5.000000000000000000e+00 4.711923076923073950e+02 1.973425598144531250e+02 -6.351318359375000000e-01 0.000000000000000000e+00 0.000000000000000000e+00 1.756158203125000000e+03 3.108565092086791992e+00 1.000000000000000000e+00 7.949562377929687500e+02 -1.192500000000000000e+02 5.525000000000000000e+01
4.000000000000000000e+00 4.682153846153848349e+02 2.052200469970703125e+02 -5.199890136718750000e-01 0.000000000000000000e+00 0.000000000000000000e+00 1.819067138671875000e+03 3.194482564926147461e+00 1.000000000000000000e+00 5.788791503906250000e+02 -1.182500000000000000e+02 5.525000000000000000e+01
6.600000000000000000e+01 4.770769230769226397e+02 2.031561126708984375e+02 -4.698486328125000000e-01 0.000000000000000000e+00 2.941176593303680420e-01 1.856776611328125000e+03 2.154892444610595703e+00 4.000000000000000000e+00 7.625324707031250000e+02 -1.177500000000000000e+02 5.525000000000000000e+01
5.200000000000000000e+01 4.799230769230765077e+02 1.849071197509765625e+02 -3.745117187500000000e-01 0.000000000000000000e+00 1.352941155433654785e+00 1.936365600585937500e+03 2.296821832656860352e+00 4.000000000000000000e+00 7.372947998046875000e+02 -1.167500000000000000e+02 5.525000000000000000e+01
5.500000000000000000e+01 4.912461538461539021e+02 1.780037536621093750e+02 -3.268432617187500000e-01 0.000000000000000000e+00 0.000000000000000000e+00 1.976160156250000000e+03 8.125353455543518066e-01 4.000000000000000000e+00 6.284493408203125000e+02 -1.162500000000000000e+02 5.525000000000000000e+01
5.800000000000000000e+01 4.936999999999999318e+02 1.888488769531250000e+02 -2.098999023437500000e-01 0.000000000000000000e+00 0.000000000000000000e+00 2.135877685546875000e+03 1.411529064178466797e+00 4.000000000000000000e+00 5.883192138671875000e+02 -1.142500000000000000e+02 5.525000000000000000e+01
6.900000000000000000e+01 4.827538461538460979e+02 1.759010925292968750e+02 -2.407836914062500000e-01 0.000000000000000000e+00 0.000000000000000000e+00 2.164292724609375000e+03 8.135281205177307129e-01 4.000000000000000000e+00 6.374118041992187500e+02 -1.137500000000000000e+02 5.525000000000000000e+01
5.500000000000000000e+01 4.693692307692309100e+02 1.203836593627929688e+02 -3.025817871093750000e-01 0.000000000000000000e+00 0.000000000000000000e+00 2.221122558593750000e+03 1.981561303138732910e+00 4.000000000000000000e+00 5.901035156250000000e+02 -1.127500000000000000e+02 5.525000000000000000e+01
3.300000000000000000e+01 4.720384615384615472e+02 1.086059188842773438e+02 -3.761901855468750000e-01 0.000000000000000000e+00 5.882353186607360840e-01 2.237322998046875000e+03 1.673436641693115234e+00 3.000000000000000000e+00 5.964743652343750000e+02 -1.122500000000000000e+02 5.525000000000000000e+01
5.800000000000000000e+01 4.719846153846153811e+02 1.118804321289062500e+02 -4.924621582031250000e-01 0.000000000000000000e+00 6.470588445663452148e-01 2.241309082031250000e+03 1.679255485534667969e+00 4.000000000000000000e+00 6.267786865234375000e+02 -1.117500000000000000e+02 5.525000000000000000e+01
5.900000000000000000e+01 4.694769230769228443e+02 1.274583129882812500e+02 -6.087341308593750000e-01 0.000000000000000000e+00 5.882353186607360840e-01 2.245295166015625000e+03 1.951756000518798828e+00 4.000000000000000000e+00 6.760175170898437500e+02 -1.112500000000000000e+02 5.525000000000000000e+01
6.700000000000000000e+01 4.589230769230770761e+02 1.485224914550781250e+02 -7.250366210937500000e-01 0.000000000000000000e+00 5.882353186607360840e-01 2.249281250000000000e+03 1.954084753990173340e+00 4.000000000000000000e+00 7.091195068359375000e+02 -1.107500000000000000e+02 5.525000000000000000e+01
7.100000000000000000e+01 4.553230769230770534e+02 1.651298980712890625e+02 -9.471130371093750000e-01 9.999999776482582092e-03 0.000000000000000000e+00 2.235330078125000000e+03 1.955041527748107910e+00 4.000000000000000000e+00 7.258421020507812500e+02 -1.102500000000000000e+02 5.525000000000000000e+01
4.900000000000000000e+01 4.477461538461537884e+02 1.742546691894531250e+02 -1.204467773437500000e+00 0.000000000000000000e+00 0.000000000000000000e+00 2.215400146484375000e+03 1.953546762466430664e+00 4.000000000000000000e+00 6.474076538085937500e+02 -1.097500000000000000e+02 5.525000000000000000e+01
4.800000000000000000e+01 4.450923076923077701e+02 2.093389282226562500e+02 -2.248840332031250000e+00 0.000000000000000000e+00 5.882353186607360840e-01 2.127578857421875000e+03 1.993981719017028809e+00 4.000000000000000000e+00 4.304682922363281250e+02 -1.077500000000000000e+02 5.525000000000000000e+01
6.400000000000000000e+01 4.571000000000000796e+02 2.316147308349609375e+02 -2.513641357421875000e+00 9.999999776482582092e-03 0.000000000000000000e+00 2.103598144531250000e+03 1.987188220024108887e+00 4.000000000000000000e+00 4.843126525878906250e+02 -1.072500000000000000e+02 5.525000000000000000e+01
4.700000000000000000e+01 4.738153846153842323e+02 2.596067810058593750e+02 -2.738769531250000000e+00 0.000000000000000000e+00 0.000000000000000000e+00 2.082349121093750000e+03 1.984728455543518066e+00 4.000000000000000000e+00 4.100813598632812500e+02 -1.067500000000000000e+02 5.525000000000000000e+01
6.600000000000000000e+01 4.871076923076922753e+02 2.745435791015625000e+02 -2.844818115234375000e+00 9.999999776482582092e-03 0.000000000000000000e+00 2.069294677734375000e+03 1.979886054992675781e+00 4.000000000000000000e+00 4.036624145507812500e+02 -1.062500000000000000e+02 5.525000000000000000e+01
6.600000000000000000e+01 5.081384615384612857e+02 2.749465942382812500e+02 -2.950866699218750000e+00 9.999999776482582092e-03 0.000000000000000000e+00 2.056240234375000000e+03 1.964217901229858398e+00 4.000000000000000000e+00 3.815077514648437500e+02 -1.057500000000000000e+02 5.525000000000000000e+01
4.700000000000000000e+01 5.087538461538460410e+02 2.831739501953125000e+02 -3.110565185546875000e+00 9.999999776482582092e-03 5.882353186607360840e-01 2.036458251953125000e+03 1.919501900672912598e+00 4.000000000000000000e+00 3.772655944824218750e+02 -1.042500000000000000e+02 5.525000000000000000e+01
6.400000000000000000e+01 5.189076923076925141e+02 2.938472290039062500e+02 -3.110992431640625000e+00 9.999999776482582092e-03 5.882353186607360840e-01 2.036324829101562500e+03 1.913035392761230469e+00 4.000000000000000000e+00 3.636080932617187500e+02 -1.037500000000000000e+02 5.525000000000000000e+01
6.300000000000000000e+01 5.306538461538461888e+02 3.029549560546875000e+02 -3.111450195312500000e+00 9.999999776482582092e-03 8.235294222831726074e-01 2.036191284179687500e+03 1.914706110954284668e+00 4.000000000000000000e+00 3.354284667968750000e+02 -1.032500000000000000e+02 5.525000000000000000e+01
3.900000000000000000e+01 5.263923076923072131e+02 3.073725891113281250e+02 -3.114105224609375000e+00 9.999999776482582092e-03 8.235294222831726074e-01 2.036430053710937500e+03 1.942630767822265625e+00 3.000000000000000000e+00 3.524410400390625000e+02 -1.027500000000000000e+02 5.525000000000000000e+01
5.000000000000000000e+01 5.226307692307693742e+02 2.947501831054687500e+02 -3.117523193359375000e+00 9.999999776482582092e-03 7.647058963775634766e-01 2.036792846679687500e+03 1.964132905006408691e+00 4.000000000000000000e+00 3.414334106445312500e+02 -1.022500000000000000e+02 5.525000000000000000e+01
5.800000000000000000e+01 5.156000000000001364e+02 2.774683532714843750e+02 -3.120941162109375000e+00 9.999999776482582092e-03 0.000000000000000000e+00 2.037155517578125000e+03 1.963272690773010254e+00 4.000000000000000000e+00 3.071369018554687500e+02 -1.017500000000000000e+02 5.525000000000000000e+01
5.300000000000000000e+01 5.018692307692308532e+02 2.542164306640625000e+02 -3.219329833984375000e+00 1.166272312402725220e-01 5.882352963089942932e-02 2.031773559570312500e+03 1.938583850860595703e+00 4.000000000000000000e+00 3.042572326660156250e+02 -1.007500000000000000e+02 5.525000000000000000e+01
4.400000000000000000e+01 5.029384615384616382e+02 2.537301483154296875e+02 -3.314331054687500000e+00 1.257144212722778320e-01 2.941176593303680420e-01 2.026028686523437500e+03 1.928267598152160645e+00 3.000000000000000000e+00 2.990628356933593750e+02 -1.002500000000000000e+02 5.525000000000000000e+01
5.200000000000000000e+01 1.873192307692308077e+03 6.944776000976562500e+02 9.845886230468750000e-01 0.000000000000000000e+00 2.352941185235977173e-01 1.334320434570312500e+03 1.962125539779663086e+00 4.000000000000000000e+00 6.063619995117187500e+02 -1.312500000000000000e+02 5.575000000000000000e+01
5.200000000000000000e+01 1.584361538461538203e+03 6.516508789062500000e+02 -6.627807617187500000e-01 9.999999776482582092e-03 0.000000000000000000e+00 1.153770751953125000e+03 1.415210604667663574e+00 4.000000000000000000e+00 7.843933715820312500e+02 -1.302500000000000000e+02 5.575000000000000000e+01
1.000000000000000000e+00 1.304723076923077542e+03 5.416193237304687500e+02 -1.486480712890625000e+00 1.070025414228439331e-01 0.000000000000000000e+00 1.063495971679687500e+03 1.684378862380981445e+00 1.000000000000000000e+00 1.310187622070312500e+03 -1.297500000000000000e+02 5.575000000000000000e+01
5.900000000000000000e+01 1.131700000000000045e+03 4.907766723632812500e+02 -2.258605957031250000e+00 0.000000000000000000e+00 0.000000000000000000e+00 9.861403198242187500e+02 1.158795237541198730e+00 4.000000000000000000e+00 5.680922241210937500e+02 -1.292500000000000000e+02 5.575000000000000000e+01
6.600000000000000000e+01 8.719000000000002046e+02 4.823632507324218750e+02 -2.876007080078125000e+00 0.000000000000000000e+00 1.176470592617988586e-01 9.475421752929687500e+02 1.867453455924987793e+00 4.000000000000000000e+00 4.701996765136718750e+02 -1.287500000000000000e+02 5.575000000000000000e+01
5.900000000000000000e+01 6.826153846153846416e+02 4.211060791015625000e+02 -3.493408203125000000e+00 1.282122582197189331e-01 0.000000000000000000e+00 9.089440307617187500e+02 1.243254184722900391e+00 4.000000000000000000e+00 1.155299560546875000e+03 -1.282500000000000000e+02 5.575000000000000000e+01
4.600000000000000000e+01 5.002692307692307736e+02 2.809044494628906250e+02 -4.423675537109375000e+00 0.000000000000000000e+00 0.000000000000000000e+00 8.766804199218750000e+02 6.632590293884277344e-01 4.000000000000000000e+00 9.441705932617187500e+02 -1.272500000000000000e+02 5.575000000000000000e+01
6.900000000000000000e+01 4.750307692307692946e+02 2.726172790527343750e+02 -4.432037353515625000e+00 2.399034351110458374e-01 2.941176593303680420e-01 9.279477539062500000e+02 6.710642576217651367e-01 4.000000000000000000e+00 1.421639526367187500e+03 -1.267500000000000000e+02 5.575000000000000000e+01
7.000000000000000000e+01 4.815230769230768146e+02 2.706379089355468750e+02 -4.440399169921875000e+00 0.000000000000000000e+00 5.882352963089942932e-02 9.792150878906250000e+02 1.376536726951599121e+00 4.000000000000000000e+00 8.195792846679687500e+02 -1.262500000000000000e+02 5.575000000000000000e+01
5.300000000000000000e+01 4.946846153846155403e+02 2.815416564941406250e+02 -4.448730468750000000e+00 9.999999776482582092e-03 0.000000000000000000e+00 1.030482421875000000e+03 1.343615412712097168e+00 4.000000000000000000e+00 1.087623413085937500e+03 -1.257500000000000000e+02 5.575000000000000000e+01
5.300000000000000000e+01 5.034538461538464844e+02 3.161266784667968750e+02 -4.217132568359375000e+00 9.999999776482582092e-03 0.000000000000000000e+00 1.084314086914062500e+03 1.599257111549377441e+00 4.000000000000000000e+00 1.202893798828125000e+03 -1.252500000000000000e+02 5.575000000000000000e+01
6.800000000000000000e+01 5.338230769230768828e+02 3.597017822265625000e+02 -3.905548095703125000e+00 9.999999776482582092e-03 0.000000000000000000e+00 1.139000610351562500e+03 1.616849541664123535e+00 4.000000000000000000e+00 1.161566894531250000e+03 -1.247500000000000000e+02 5.575000000000000000e+01
5.500000000000000000e+01 5.813692307692307395e+02 3.850290222167968750e+02 -3.593933105468750000e+00 2.837253808975219727e-01 0.000000000000000000e+00 1.193687133789062500e+03 1.682808995246887207e+00 4.000000000000000000e+00 1.394313476562500000e+03 -1.242500000000000000e+02 5.575000000000000000e+01
5.900000000000000000e+01 6.969769230769229580e+02 3.893056640625000000e+02 -2.815612792968750000e+00 9.999999776482582092e-03 0.000000000000000000e+00 1.334269897460937500e+03 8.650952577590942383e-01 4.000000000000000000e+00 1.304660522460937500e+03 -1.232500000000000000e+02 5.575000000000000000e+01
6.100000000000000000e+01 7.575230769230764736e+02 3.789087219238281250e+02 -2.348846435546875000e+00 1.748490929603576660e-01 0.000000000000000000e+00 1.420166015625000000e+03 1.690911531448364258e+00 4.000000000000000000e+00 1.393445068359375000e+03 -1.227500000000000000e+02 5.575000000000000000e+01
4.800000000000000000e+01 7.385076923076921958e+02 3.553765563964843750e+02 -1.882110595703125000e+00 0.000000000000000000e+00 0.000000000000000000e+00 1.506062133789062500e+03 1.716059803962707520e+00 4.000000000000000000e+00 1.023728820800781250e+03 -1.222500000000000000e+02 5.575000000000000000e+01
5.300000000000000000e+01 6.680153846153849599e+02 3.147431030273437500e+02 -1.471679687500000000e+00 9.999999776482582092e-03 0.000000000000000000e+00 1.585625366210937500e+03 1.603282928466796875e+00 4.000000000000000000e+00 1.073728759765625000e+03 -1.217500000000000000e+02 5.575000000000000000e+01
4.300000000000000000e+01 6.074615384615385665e+02 2.694685363769531250e+02 -1.230163574218750000e+00 0.000000000000000000e+00 0.000000000000000000e+00 1.646189697265625000e+03 7.840787768363952637e-01 3.000000000000000000e+00 6.991298828125000000e+02 -1.212500000000000000e+02 5.575000000000000000e+01
1.200000000000000000e+01 5.594846153846154948e+02 2.346657562255859375e+02 -9.886474609375000000e-01 0.000000000000000000e+00 0.000000000000000000e+00 1.706753906250000000e+03 7.853217124938964844e-01 1.000000000000000000e+00 7.492836303710937500e+02 -1.207500000000000000e+02 5.575000000000000000e+01
4.200000000000000000e+01 4.785461538461536861e+02 2.090641326904296875e+02 -5.936279296875000000e-01 0.000000000000000000e+00 0.000000000000000000e+00 1.816127441406250000e+03 9.049174785614013672e-01 3.000000000000000000e+00 8.006083374023437500e+02 -1.197500000000000000e+02 5.575000000000000000e+01
3.000000000000000000e+00 4.280846153846154039e+02 1.956979980468750000e+02 -3.657836914062500000e-01 0.000000000000000000e+00 0.000000000000000000e+00 1.961843139648437500e+03 3.235586404800415039e+00 1.000000000000000000e+00 5.665374145507812500e+02 -1.177500000000000000e+02 5.575000000000000000e+01
2.700000000000000000e+01 4.650692307692307850e+02 1.902883300781250000e+02 -3.058471679687500000e-01 0.000000000000000000e+00 0.000000000000000000e+00 2.062999267578125000e+03 9.170060753822326660e-01 3.000000000000000000e+00 6.919331665039062500e+02 -1.162500000000000000e+02 5.575000000000000000e+01
5.300000000000000000e+01 4.721692307692308077e+02 1.917438354492187500e+02 -3.238220214843750000e-01 0.000000000000000000e+00 0.000000000000000000e+00 2.090767822265625000e+03 8.002542257308959961e-01 4.000000000000000000e+00 7.038837890625000000e+02 -1.157500000000000000e+02 5.575000000000000000e+01
5.100000000000000000e+01 4.751000000000003070e+02 1.987043304443359375e+02 -3.597717285156250000e-01 0.000000000000000000e+00 0.000000000000000000e+00 2.146304687500000000e+03 1.918541550636291504e+00 4.000000000000000000e+00 6.649830322265625000e+02 -1.147500000000000000e+02 5.575000000000000000e+01
6.200000000000000000e+01 4.739076923076921730e+02 1.979784698486328125e+02 -3.917846679687500000e-01 0.000000000000000000e+00 0.000000000000000000e+00 2.171025634765625000e+03 1.623324751853942871e+00 4.000000000000000000e+00 6.477846679687500000e+02 -1.142500000000000000e+02 5.575000000000000000e+01
5.900000000000000000e+01 4.596538461538460183e+02 1.910309753417968750e+02 -4.659118652343750000e-01 0.000000000000000000e+00 0.000000000000000000e+00 2.186603515625000000e+03 1.120890259742736816e+00 4.000000000000000000e+00 5.956694335937500000e+02 -1.137500000000000000e+02 5.575000000000000000e+01
4.500000000000000000e+01 4.521384615384612289e+02 1.493661804199218750e+02 -6.141662597656250000e-01 0.000000000000000000e+00 0.000000000000000000e+00 2.217759277343750000e+03 1.972040653228759766e+00 4.000000000000000000e+00 5.500814819335937500e+02 -1.127500000000000000e+02 5.575000000000000000e+01
3.000000000000000000e+01 4.712846153846152788e+02 1.384177398681640625e+02 -7.288513183593750000e-01 0.000000000000000000e+00 5.882353186607360840e-01 2.222431640625000000e+03 1.951929330825805664e+00 3.000000000000000000e+00 6.437603149414062500e+02 -1.122500000000000000e+02 5.575000000000000000e+01
3.500000000000000000e+01 4.738999999999998636e+02 1.431400756835937500e+02 -8.841247558593750000e-01 0.000000000000000000e+00 5.882353186607360840e-01 2.216198730468750000e+03 1.931456565856933594e+00 3.000000000000000000e+00 6.723495483398437500e+02 -1.117500000000000000e+02 5.575000000000000000e+01
3.800000000000000000e+01 4.728461538461537543e+02 1.545745544433593750e+02 -1.039398193359375000e+00 0.000000000000000000e+00 1.117647051811218262e+00 2.209965820312500000e+03 1.936434030532836914e+00 3.000000000000000000e+00 5.865428466796875000e+02 -1.112500000000000000e+02 5.575000000000000000e+01
6.100000000000000000e+01 4.648692307692307963e+02 1.647053222656250000e+02 -1.194641113281250000e+00 9.999999776482582092e-03 0.000000000000000000e+00 2.203732910156250000e+03 1.906811833381652832e+00 4.000000000000000000e+00 5.663460083007812500e+02 -1.107500000000000000e+02 5.575000000000000000e+01
3.700000000000000000e+01 4.562000000000001023e+02 1.718654022216796875e+02 -1.435607910156250000e+00 9.999999776482582092e-03 5.882352963089942932e-02 2.183478515625000000e+03 1.941902518272399902e+00 3.000000000000000000e+00 5.766615600585937500e+02 -1.102500000000000000e+02 5.575000000000000000e+01
5.200000000000000000e+01 4.436846153846155403e+02 1.789705657958984375e+02 -1.705169677734375000e+00 9.999999776482582092e-03 2.941176593303680420e-01 2.158550292968750000e+03 1.947522401809692383e+00 4.000000000000000000e+00 5.600016479492187500e+02 -1.097500000000000000e+02 5.575000000000000000e+01
7.000000000000000000e+01 4.395384615384618314e+02 1.848667602539062500e+02 -1.974700927734375000e+00 0.000000000000000000e+00 5.882353186607360840e-01 2.133622070312500000e+03 1.963251471519470215e+00 4.000000000000000000e+00 4.911304016113281250e+02 -1.092500000000000000e+02 5.575000000000000000e+01
4.200000000000000000e+01 4.567461538461536179e+02 2.208383636474609375e+02 -2.990264892578125000e+00 9.999999776482582092e-03 7.058823704719543457e-01 2.037038330078125000e+03 1.969186544418334961e+00 3.000000000000000000e+00 4.350022583007812500e+02 -1.072500000000000000e+02 5.575000000000000000e+01
3.600000000000000000e+01 4.859615384615385096e+02 2.591706542968750000e+02 -3.291870117187500000e+00 9.999999776482582092e-03 5.882353186607360840e-01 2.001903442382812500e+03 1.954840183258056641e+00 3.000000000000000000e+00 4.112647399902343750e+02 -1.062500000000000000e+02 5.575000000000000000e+01
3.800000000000000000e+01 5.063076923076926619e+02 2.806222229003906250e+02 -3.476043701171875000e+00 9.999999776482582092e-03 7.058823704719543457e-01 1.974349609375000000e+03 1.923513293266296387e+00 3.000000000000000000e+00 4.141065063476562500e+02 -1.052500000000000000e+02 5.575000000000000000e+01
5.000000000000000000e+01 5.371461538461537657e+02 3.412410888671875000e+02 -3.584533691406250000e+00 1.216242164373397827e-01 9.411764740943908691e-01 1.957227783203125000e+03 1.329826116561889648e+00 4.000000000000000000e+00 3.613116760253906250e+02 -1.032500000000000000e+02 5.575000000000000000e+01
3.400000000000000000e+01 5.302076923076923549e+02 3.490595703125000000e+02 -3.617034912109375000e+00 1.405582875013351440e-01 9.411764740943908691e-01 1.954170410156250000e+03 1.842233300209045410e+00 3.000000000000000000e+00 3.585588989257812500e+02 -1.027500000000000000e+02 5.575000000000000000e+01
6.100000000000000000e+01 5.110153846153847894e+02 2.719264831542968750e+02 -3.971954345703125000e+00 1.941346526145935059e-01 0.000000000000000000e+00 1.928379760742187500e+03 1.776653647422790527e+00 4.000000000000000000e+00 3.014713745117187500e+02 -1.002500000000000000e+02 5.575000000000000000e+01
1.500000000000000000e+01 9.242923076923082135e+02 4.946827392578125000e+02 3.943328857421875000e+00 0.000000000000000000e+00 0.000000000000000000e+00 1.795200439453125000e+03 1.416346192359924316e+00 1.000000000000000000e+00 2.171063079833984375e+02 -1.597500000000000000e+02 5.625000000000000000e+01
4.800000000000000000e+01 1.628769230769230262e+03 6.757579345703125000e+02 4.376525878906250000e-01 0.000000000000000000e+00 0.000000000000000000e+00 1.226845825195312500e+03 1.565192341804504395e+00 4.000000000000000000e+00 5.536671142578125000e+02 -1.317500000000000000e+02 5.625000000000000000e+01
2.000000000000000000e+00 1.530523076923077724e+03 6.826459350585937500e+02 -6.225280761718750000e-01 0.000000000000000000e+00 0.000000000000000000e+00 1.007167724609375000e+03 1.453751087188720703e+00 1.000000000000000000e+00 4.228916320800781250e+02 -1.312500000000000000e+02 5.625000000000000000e+01
6.000000000000000000e+00 1.460584615384616200e+03 6.645827026367187500e+02 -1.306060791015625000e+00 0.000000000000000000e+00 0.000000000000000000e+00 9.833000488281250000e+02 1.457544326782226562e+00 1.000000000000000000e+00 1.199072021484375000e+03 -1.307500000000000000e+02 5.625000000000000000e+01
1.000000000000000000e+00 1.053876923076923049e+03 4.847567443847656250e+02 -2.673156738281250000e+00 9.999999776482582092e-03 2.352941185235977173e-01 9.355646972656250000e+02 1.541606307029724121e+00 1.000000000000000000e+00 1.228428588867187500e+03 -1.297500000000000000e+02 5.625000000000000000e+01
6.300000000000000000e+01 9.292923076923071903e+02 4.666922912597656250e+02 -3.346435546875000000e+00 1.285505145788192749e-01 0.000000000000000000e+00 9.065957641601562500e+02 8.662846088409423828e-01 4.000000000000000000e+00 1.073122192382812500e+03 -1.292500000000000000e+02 5.625000000000000000e+01
7.200000000000000000e+01 7.360615384615387029e+02 4.622426452636718750e+02 -3.988861083984375000e+00 0.000000000000000000e+00 0.000000000000000000e+00 8.623231811523437500e+02 1.313030362129211426e+00 4.000000000000000000e+00 4.311364440917968750e+02 -1.287500000000000000e+02 5.625000000000000000e+01
2.800000000000000000e+01 6.070153846153845052e+02 4.180007324218750000e+02 -4.631286621093750000e+00 1.123633012175559998e-01 0.000000000000000000e+00 8.180505981445312500e+02 8.845276236534118652e-01 3.000000000000000000e+00 1.260416625976562500e+03 -1.282500000000000000e+02 5.625000000000000000e+01
7.400000000000000000e+01 5.201000000000001364e+02 3.051461486816406250e+02 -5.273712158203125000e+00 1.957466602325439453e-01 2.941176593303680420e-01 7.737780151367187500e+02 6.211907863616943359e-01 4.000000000000000000e+00 1.001217224121093750e+03 -1.277500000000000000e+02 5.625000000000000000e+01
5.800000000000000000e+01 4.716153846153848122e+02 2.732203674316406250e+02 -5.562866210937500000e+00 9.999999776482582092e-03 2.352941185235977173e-01 7.800966186523437500e+02 6.957498788833618164e-01 4.000000000000000000e+00 8.784121093750000000e+02 -1.272500000000000000e+02 5.625000000000000000e+01
6.000000000000000000e+01 4.603999999999998636e+02 2.691151733398437500e+02 -5.498748779296875000e+00 3.026425540447235107e-01 0.000000000000000000e+00 8.370064086914062500e+02 5.949391722679138184e-01 4.000000000000000000e+00 1.597721679687500000e+03 -1.267500000000000000e+02 5.625000000000000000e+01
9.000000000000000000e+00 4.724692307692304212e+02 2.759065246582031250e+02 -5.434661865234375000e+00 3.220196068286895752e-01 0.000000000000000000e+00 8.939161987304687500e+02 5.805606842041015625e-01 1.000000000000000000e+00 1.469329956054687500e+03 -1.262500000000000000e+02 5.625000000000000000e+01
5.600000000000000000e+01 4.807307692307691696e+02 2.982235717773437500e+02 -5.370574951171875000e+00 2.957663834095001221e-01 0.000000000000000000e+00 9.508259887695312500e+02 5.909888744354248047e-01 4.000000000000000000e+00 1.556853393554687500e+03 -1.257500000000000000e+02 5.625000000000000000e+01
6.500000000000000000e+01 5.275692307692306713e+02 3.716196289062500000e+02 -4.622314453125000000e+00 3.646432459354400635e-01 0.000000000000000000e+00 1.080257324218750000e+03 9.638992547988891602e-01 4.000000000000000000e+00 1.326982666015625000e+03 -1.247500000000000000e+02 5.625000000000000000e+01
4.600000000000000000e+01 6.137076923076922412e+02 3.843240661621093750e+02 -3.785491943359375000e+00 4.493038058280944824e-01 0.000000000000000000e+00 1.211919067382812500e+03 9.693214297294616699e-01 4.000000000000000000e+00 1.580160400390625000e+03 -1.237500000000000000e+02 5.625000000000000000e+01
6.400000000000000000e+01 6.473692307692308532e+02 3.719645385742187500e+02 -3.202972412109375000e+00 9.999999776482582092e-03 2.941176593303680420e-01 1.321971801757812500e+03 1.645169258117675781e+00 4.000000000000000000e+00 1.357384277343750000e+03 -1.232500000000000000e+02 5.625000000000000000e+01
3.700000000000000000e+01 6.576769230769230035e+02 3.429832763671875000e+02 -2.620422363281250000e+00 1.841678470373153687e-01 0.000000000000000000e+00 1.432024658203125000e+03 1.743175864219665527e+00 3.000000000000000000e+00 1.380773071289062500e+03 -1.227500000000000000e+02 5.625000000000000000e+01
5.800000000000000000e+01 6.054307692307689877e+02 3.102781982421875000e+02 -2.037902832031250000e+00 0.000000000000000000e+00 5.882352963089942932e-02 1.542077514648437500e+03 9.384162425994873047e-01 4.000000000000000000e+00 9.523388671875000000e+02 -1.222500000000000000e+02 5.625000000000000000e+01
1.600000000000000000e+01 5.617461538461539021e+02 2.762414245605468750e+02 -1.532958984375000000e+00 0.000000000000000000e+00 2.941176593303680420e-01 1.641501586914062500e+03 8.064342737197875977e-01 1.000000000000000000e+00 7.103150024414062500e+02 -1.217500000000000000e+02 5.625000000000000000e+01
6.000000000000000000e+00 5.266923076923077360e+02 2.446412963867187500e+02 -1.260711669921875000e+00 0.000000000000000000e+00 5.882353186607360840e-01 1.709039428710937500e+03 8.166127204895019531e-01 1.000000000000000000e+00 5.691122436523437500e+02 -1.212500000000000000e+02 5.625000000000000000e+01
1.700000000000000000e+01 4.732461538461536747e+02 2.278878784179687500e+02 -7.162170410156250000e-01 0.000000000000000000e+00 0.000000000000000000e+00 1.844115234375000000e+03 1.925385475158691406e+00 1.000000000000000000e+00 6.656524047851562500e+02 -1.202500000000000000e+02 5.625000000000000000e+01
1.100000000000000000e+01 4.550076923076921389e+02 2.236905517578125000e+02 -5.451965332031250000e-01 0.000000000000000000e+00 0.000000000000000000e+00 1.898786743164062500e+03 2.874851942062377930e+00 1.000000000000000000e+00 6.354346313476562500e+02 -1.197500000000000000e+02 5.625000000000000000e+01
4.500000000000000000e+01 4.312846153846153925e+02 2.157094573974609375e+02 -4.754333496093750000e-01 0.000000000000000000e+00 0.000000000000000000e+00 1.940591796875000000e+03 8.581609129905700684e-01 4.000000000000000000e+00 5.510855712890625000e+02 -1.192500000000000000e+02 5.625000000000000000e+01
1.300000000000000000e+01 4.342846153846153925e+02 1.965999450683593750e+02 -3.359069824218750000e-01 0.000000000000000000e+00 0.000000000000000000e+00 2.024202026367187500e+03 2.701653718948364258e+00 1.000000000000000000e+00 6.835186767578125000e+02 -1.182500000000000000e+02 5.625000000000000000e+01
4.000000000000000000e+00 3.978538461538458932e+02 1.938174743652343750e+02 -3.313598632812500000e-01 0.000000000000000000e+00 0.000000000000000000e+00 2.083196777343750000e+03 2.127146959304809570e+00 1.000000000000000000e+00 4.708505249023437500e+02 -1.172500000000000000e+02 5.625000000000000000e+01
5.500000000000000000e+01 4.243076923076921503e+02 1.968127441406250000e+02 -3.387451171875000000e-01 0.000000000000000000e+00 0.000000000000000000e+00 2.110936035156250000e+03 1.328977704048156738e+00 4.000000000000000000e+00 6.581077270507812500e+02 -1.167500000000000000e+02 5.625000000000000000e+01
5.900000000000000000e+01 4.420923076923077701e+02 2.037322387695312500e+02 -3.460998535156250000e-01 0.000000000000000000e+00 0.000000000000000000e+00 2.138675292968750000e+03 9.986728429794311523e-01 4.000000000000000000e+00 7.007833862304687500e+02 -1.162500000000000000e+02 5.625000000000000000e+01
6.400000000000000000e+01 4.442384615384614790e+02 2.083162384033203125e+02 -4.096984863281250000e-01 0.000000000000000000e+00 2.352941185235977173e-01 2.154452392578125000e+03 7.980281114578247070e-01 4.000000000000000000e+00 6.146011352539062500e+02 -1.157500000000000000e+02 5.625000000000000000e+01
6.200000000000000000e+01 4.417615384615382936e+02 2.122254180908203125e+02 -4.733276367187500000e-01 0.000000000000000000e+00 2.941176593303680420e-01 2.170229736328125000e+03 8.004753589630126953e-01 4.000000000000000000e+00 6.098476562500000000e+02 -1.152500000000000000e+02 5.625000000000000000e+01
5.200000000000000000e+01 4.479461538461538339e+02 2.159047851562500000e+02 -5.369262695312500000e-01 0.000000000000000000e+00 0.000000000000000000e+00 2.186007080078125000e+03 7.991067767143249512e-01 4.000000000000000000e+00 6.339912109375000000e+02 -1.147500000000000000e+02 5.625000000000000000e+01
4.300000000000000000e+01 4.451615384615384414e+02 2.134564361572265625e+02 -6.126708984375000000e-01 0.000000000000000000e+00 0.000000000000000000e+00 2.198740478515625000e+03 8.001121282577514648e-01 3.000000000000000000e+00 6.170856933593750000e+02 -1.142500000000000000e+02 5.625000000000000000e+01
4.600000000000000000e+01 4.345769230769232649e+02 2.097776947021484375e+02 -7.248229980468750000e-01 0.000000000000000000e+00 2.941176593303680420e-01 2.202342041015625000e+03 1.472267508506774902e+00 4.000000000000000000e+00 5.570916137695312500e+02 -1.137500000000000000e+02 5.625000000000000000e+01
5.700000000000000000e+01 4.410846153846153470e+02 2.003219757080078125e+02 -8.370056152343750000e-01 0.000000000000000000e+00 5.882353186607360840e-01 2.205943847656250000e+03 1.969746947288513184e+00 4.000000000000000000e+00 6.170083007812500000e+02 -1.132500000000000000e+02 5.625000000000000000e+01
4.600000000000000000e+01 4.390153846153847894e+02 1.911852569580078125e+02 -9.491577148437500000e-01 0.000000000000000000e+00 0.000000000000000000e+00 2.209545654296875000e+03 1.980857372283935547e+00 4.000000000000000000e+00 5.506851806640625000e+02 -1.127500000000000000e+02 5.625000000000000000e+01
5.700000000000000000e+01 4.539230769230770761e+02 1.883252258300781250e+02 -1.098236083984375000e+00 0.000000000000000000e+00 2.941176593303680420e-01 2.203692871093750000e+03 1.977219223976135254e+00 4.000000000000000000e+00 5.468754272460937500e+02 -1.122500000000000000e+02 5.625000000000000000e+01
2.100000000000000000e+01 4.616615384615384983e+02 1.908936157226562500e+02 -1.284240722656250000e+00 9.999999776482582092e-03 6.470588445663452148e-01 2.188385742187500000e+03 1.948773264884948730e+00 3.000000000000000000e+00 5.867674560546875000e+02 -1.117500000000000000e+02 5.625000000000000000e+01
4.100000000000000000e+01 4.758769230769230489e+02 1.956942291259765625e+02 -1.470245361328125000e+00 9.999999776482582092e-03 5.882353186607360840e-01 2.173078613281250000e+03 1.939073920249938965e+00 3.000000000000000000e+00 7.264136352539062500e+02 -1.112500000000000000e+02 5.625000000000000000e+01
3.100000000000000000e+01 4.410615384615381345e+02 1.984026794433593750e+02 -1.656250000000000000e+00 0.000000000000000000e+00 0.000000000000000000e+00 2.157771484375000000e+03 1.968774318695068359e+00 3.000000000000000000e+00 4.733149108886718750e+02 -1.107500000000000000e+02 5.625000000000000000e+01
6.800000000000000000e+01 4.391692307692305235e+02 1.978996887207031250e+02 -1.909454345703125000e+00 9.999999776482582092e-03 0.000000000000000000e+00 2.131995849609375000e+03 1.983006715774536133e+00 4.000000000000000000e+00 4.748872680664062500e+02 -1.102500000000000000e+02 5.625000000000000000e+01
3.900000000000000000e+01 4.376692307692307509e+02 1.963852691650390625e+02 -2.185028076171875000e+00 9.999999776482582092e-03 3.529411852359771729e-01 2.102730224609375000e+03 1.979809284210205078e+00 3.000000000000000000e+00 4.777133178710937500e+02 -1.097500000000000000e+02 5.625000000000000000e+01
4.100000000000000000e+01 4.330999999999998522e+02 1.987528228759765625e+02 -2.460601806640625000e+00 9.999999776482582092e-03 0.000000000000000000e+00 2.073464843750000000e+03 1.972248196601867676e+00 3.000000000000000000e+00 4.354701538085937500e+02 -1.092500000000000000e+02 5.625000000000000000e+01
6.000000000000000000e+01 4.477307692307691127e+02 2.255916442871093750e+02 -3.201446533203125000e+00 9.999999776482582092e-03 7.058823704719543457e-01 1.996308837890625000e+03 1.944755077362060547e+00 4.000000000000000000e+00 4.293153076171875000e+02 -1.077500000000000000e+02 5.625000000000000000e+01
4.000000000000000000e+01 4.584461538461539476e+02 2.411813507080078125e+02 -3.434051513671875000e+00 9.999999776482582092e-03 2.941176593303680420e-01 1.972363647460937500e+03 1.935027480125427246e+00 3.000000000000000000e+00 4.623393249511718750e+02 -1.072500000000000000e+02 5.625000000000000000e+01
6.400000000000000000e+01 4.735230769230768146e+02 2.558072052001953125e+02 -3.629211425781250000e+00 1.177925318479537964e-01 6.470588445663452148e-01 1.950709838867187500e+03 1.922817111015319824e+00 4.000000000000000000e+00 5.064519958496093750e+02 -1.067500000000000000e+02 5.625000000000000000e+01
4.800000000000000000e+01 4.856692307692307509e+02 2.724990234375000000e+02 -3.712005615234375000e+00 1.182059869170188904e-01 0.000000000000000000e+00 1.935930786132812500e+03 1.903501868247985840e+00 4.000000000000000000e+00 5.236420898437500000e+02 -1.062500000000000000e+02 5.625000000000000000e+01
5.100000000000000000e+01 4.953999999999996930e+02 2.875219421386718750e+02 -3.794799804687500000e+00 1.339482218027114868e-01 6.470588445663452148e-01 1.921151611328125000e+03 1.890968322753906250e+00 4.000000000000000000e+00 5.231257934570312500e+02 -1.057500000000000000e+02 5.625000000000000000e+01
3.300000000000000000e+01 5.007769230769229125e+02 2.996040649414062500e+02 -3.877624511718750000e+00 1.357797533273696899e-01 1.117647051811218262e+00 1.906372558593750000e+03 1.888954997062683105e+00 3.000000000000000000e+00 4.957742309570312500e+02 -1.052500000000000000e+02 5.625000000000000000e+01
5.600000000000000000e+01 5.088692307692306258e+02 3.348550415039062500e+02 -3.975463867187500000e+00 1.478283703327178955e-01 1.411764740943908691e+00 1.890276489257812500e+03 1.862625956535339355e+00 4.000000000000000000e+00 4.548686828613281250e+02 -1.042500000000000000e+02 5.625000000000000000e+01
5.000000000000000000e+01 5.250230769230767010e+02 3.519763793945312500e+02 -4.013122558593750000e+00 1.712491810321807861e-01 5.882353186607360840e-01 1.884472167968750000e+03 1.842049002647399902e+00 4.000000000000000000e+00 4.417486877441406250e+02 -1.037500000000000000e+02 5.625000000000000000e+01
5.600000000000000000e+01 5.257692307692307168e+02 3.451685180664062500e+02 -4.184509277343750000e+00 2.155622839927673340e-01 6.470588445663452148e-01 1.865665405273437500e+03 1.834984779357910156e+00 4.000000000000000000e+00 3.815257873535156250e+02 -1.022500000000000000e+02 5.625000000000000000e+01
3.200000000000000000e+01 5.190153846153846189e+02 3.206734924316406250e+02 -4.255584716796875000e+00 2.336925417184829712e-01 4.117647111415863037e-01 1.859064697265625000e+03 1.840191006660461426e+00 3.000000000000000000e+00 3.517103271484375000e+02 -1.017500000000000000e+02 5.625000000000000000e+01
4.500000000000000000e+01 5.163769230769235037e+02 2.980459899902343750e+02 -4.326629638671875000e+00 2.349690049886703491e-01 0.000000000000000000e+00 1.852463989257812500e+03 1.850793719291687012e+00 4.000000000000000000e+00 3.450686035156250000e+02 -1.012500000000000000e+02 5.625000000000000000e+01
5.600000000000000000e+01 5.271615384615384983e+02 2.845915527343750000e+02 -4.471008300781250000e+00 2.247837185859680176e-01 5.882353186607360840e-01 1.842015502929687500e+03 1.860820174217224121e+00 4.000000000000000000e+00 2.741654968261718750e+02 -1.007500000000000000e+02 5.625000000000000000e+01
6.600000000000000000e+01 5.092538461538460979e+02 2.802103576660156250e+02 -4.615417480468750000e+00 2.572708129882812500e-01 2.941176593303680420e-01 1.831567016601562500e+03 1.804898381233215332e+00 4.000000000000000000e+00 3.026567993164062500e+02 -1.002500000000000000e+02 5.625000000000000000e+01
6.000000000000000000e+00 8.524999999999998863e+02 3.430024719238281250e+02 3.193634033203125000e+00 0.000000000000000000e+00 0.000000000000000000e+00 1.769374389648437500e+03 1.353039503097534180e+00 1.000000000000000000e+00 1.485715637207031250e+02 -1.582500000000000000e+02 5.675000000000000000e+01
1.000000000000000000e+00 1.233176923076922776e+03 6.557543334960937500e+02 -1.495910644531250000e+00 0.000000000000000000e+00 0.000000000000000000e+00 9.627883911132812500e+02 2.182256221771240234e+00 1.000000000000000000e+00 5.954136962890625000e+02 -1.312500000000000000e+02 5.675000000000000000e+01
1.800000000000000000e+01 9.489230769230766782e+02 5.791129760742187500e+02 -2.858978271484375000e+00 1.123006120324134827e-01 2.941176593303680420e-01 9.134097290039062500e+02 1.283091425895690918e+00 1.000000000000000000e+00 1.663383056640625000e+03 -1.302500000000000000e+02 5.675000000000000000e+01
4.300000000000000000e+01 8.273923076923075541e+02 5.097781372070312500e+02 -3.540527343750000000e+00 9.999999776482582092e-03 0.000000000000000000e+00 8.887203369140625000e+02 7.371653318405151367e-01 3.000000000000000000e+00 7.942988891601562500e+02 -1.297500000000000000e+02 5.675000000000000000e+01
1.500000000000000000e+01 7.241999999999999318e+02 4.868051452636718750e+02 -4.188232421875000000e+00 1.153141334652900696e-01 0.000000000000000000e+00 8.600232543945312500e+02 1.248707294464111328e+00 1.000000000000000000e+00 1.394405029296875000e+03 -1.292500000000000000e+02 5.675000000000000000e+01
7.000000000000000000e+01 6.202692307692307168e+02 4.641520996093750000e+02 -4.734527587890625000e+00 1.929735243320465088e-01 0.000000000000000000e+00 8.193029785156250000e+02 6.326155066490173340e-01 4.000000000000000000e+00 1.258566162109375000e+03 -1.287500000000000000e+02 5.675000000000000000e+01
2.900000000000000000e+01 5.354076923076919456e+02 4.155406494140625000e+02 -5.280822753906250000e+00 1.541471183300018311e-01 0.000000000000000000e+00 7.785827026367187500e+02 6.149228215217590332e-01 3.000000000000000000e+00 1.506784545898437500e+03 -1.282500000000000000e+02 5.675000000000000000e+01
5.400000000000000000e+01 4.803615384615385437e+02 3.076107177734375000e+02 -5.827087402343750000e+00 2.567874491214752197e-01 0.000000000000000000e+00 7.378624267578125000e+02 5.969229936599731445e-01 4.000000000000000000e+00 1.527036010742187500e+03 -1.277500000000000000e+02 5.675000000000000000e+01
5.600000000000000000e+01 4.560846153846154607e+02 2.545673370361328125e+02 -6.054779052734375000e+00 2.344596087932586670e-01 0.000000000000000000e+00 7.420563964843750000e+02 6.994502544403076172e-01 4.000000000000000000e+00 1.448170654296875000e+03 -1.272500000000000000e+02 5.675000000000000000e+01
3.300000000000000000e+01 4.465230769230769283e+02 2.509973297119140625e+02 -5.963836669921875000e+00 2.905060648918151855e-01 2.941176593303680420e-01 7.911646118164062500e+02 5.541741847991943359e-01 3.000000000000000000e+00 1.539390747070312500e+03 -1.267500000000000000e+02 5.675000000000000000e+01
1.800000000000000000e+01 4.579153846153846530e+02 2.688228149414062500e+02 -5.872924804687500000e+00 6.375996470451354980e-01 0.000000000000000000e+00 8.402728271484375000e+02 5.477948784828186035e-01 1.000000000000000000e+00 1.754224975585937500e+03 -1.262500000000000000e+02 5.675000000000000000e+01
5.800000000000000000e+01 4.683923076923075541e+02 3.094254150390625000e+02 -5.781982421875000000e+00 9.999999776482582092e-03 0.000000000000000000e+00 8.893810424804687500e+02 6.092009544372558594e-01 4.000000000000000000e+00 1.039800903320312500e+03 -1.257500000000000000e+02 5.675000000000000000e+01
2.100000000000000000e+01 4.817692307692307736e+02 3.489649963378906250e+02 -5.388153076171875000e+00 2.953705191612243652e-01 0.000000000000000000e+00 9.701447753906250000e+02 8.418766260147094727e-01 3.000000000000000000e+00 1.216271362304687500e+03 -1.252500000000000000e+02 5.675000000000000000e+01
6.000000000000000000e+01 5.461384615384616836e+02 3.702340087890625000e+02 -4.398498535156250000e+00 3.990282714366912842e-01 0.000000000000000000e+00 1.152776000976562500e+03 6.390140652656555176e-01 4.000000000000000000e+00 1.595127685546875000e+03 -1.242500000000000000e+02 5.675000000000000000e+01
3.200000000000000000e+01 5.813153846153848008e+02 3.610560913085937500e+02 -3.903656005859375000e+00 2.138707488775253296e-01 0.000000000000000000e+00 1.244091552734375000e+03 6.253269314765930176e-01 3.000000000000000000e+00 1.701721069335937500e+03 -1.237500000000000000e+02 5.675000000000000000e+01
2.800000000000000000e+01 5.978461538461540385e+02 3.376579895019531250e+02 -3.357238769531250000e+00 3.824036121368408203e-01 0.000000000000000000e+00 1.350040039062500000e+03 1.351862668991088867e+00 3.000000000000000000e+00 1.647563232421875000e+03 -1.232500000000000000e+02 5.675000000000000000e+01
5.700000000000000000e+01 5.867923076923077588e+02 3.064940795898437500e+02 -2.810791015625000000e+00 9.999999776482582092e-03 2.941176593303680420e-01 1.455988525390625000e+03 1.405443549156188965e+00 4.000000000000000000e+00 9.221422729492187500e+02 -1.227500000000000000e+02 5.675000000000000000e+01
6.600000000000000000e+01 5.570692307692305576e+02 2.762347412109375000e+02 -2.264373779296875000e+00 0.000000000000000000e+00 0.000000000000000000e+00 1.561937011718750000e+03 7.626212835311889648e-01 4.000000000000000000e+00 8.477975463867187500e+02 -1.222500000000000000e+02 5.675000000000000000e+01
6.400000000000000000e+01 5.258153846153843460e+02 2.528988800048828125e+02 -1.790039062500000000e+00 0.000000000000000000e+00 8.823529481887817383e-01 1.658492431640625000e+03 9.534007906913757324e-01 4.000000000000000000e+00 8.437325439453125000e+02 -1.217500000000000000e+02 5.675000000000000000e+01
6.100000000000000000e+01 4.621923076923078497e+02 2.318126068115234375e+02 -1.274017333984375000e+00 0.000000000000000000e+00 2.352941185235977173e-01 1.795244506835937500e+03 1.485294222831726074e+00 4.000000000000000000e+00 6.920971069335937500e+02 -1.207500000000000000e+02 5.675000000000000000e+01
2.900000000000000000e+01 4.577692307692308304e+02 2.314430847167968750e+02 -1.015991210937500000e+00 0.000000000000000000e+00 0.000000000000000000e+00 1.863620483398437500e+03 1.380946397781372070e+00 3.000000000000000000e+00 7.454740600585937500e+02 -1.202500000000000000e+02 5.675000000000000000e+01
5.400000000000000000e+01 4.497999999999999545e+02 2.303856353759765625e+02 -8.631896972656250000e-01 9.999999776482582092e-03 0.000000000000000000e+00 1.918013916015625000e+03 1.539471149444580078e+00 4.000000000000000000e+00 1.018953735351562500e+03 -1.197500000000000000e+02 5.675000000000000000e+01
6.000000000000000000e+01 4.403615384615383732e+02 2.234953308105468750e+02 -8.155822753906250000e-01 9.999999776482582092e-03 0.000000000000000000e+00 1.958424804687500000e+03 1.739179015159606934e+00 4.000000000000000000e+00 9.697991333007812500e+02 -1.192500000000000000e+02 5.675000000000000000e+01
7.100000000000000000e+01 4.341769230769229466e+02 2.100059661865234375e+02 -7.679443359375000000e-01 9.999999776482582092e-03 0.000000000000000000e+00 1.998835571289062500e+03 1.778101563453674316e+00 4.000000000000000000e+00 8.963223876953125000e+02 -1.187500000000000000e+02 5.675000000000000000e+01
5.800000000000000000e+01 4.241999999999997613e+02 1.990981140136718750e+02 -7.203369140625000000e-01 9.999999776482582092e-03 2.352941185235977173e-01 2.039246459960937500e+03 7.711677551269531250e-01 4.000000000000000000e+00 7.250090332031250000e+02 -1.182500000000000000e+02 5.675000000000000000e+01
4.300000000000000000e+01 4.079307692307691013e+02 1.963520965576171875e+02 -7.326354980468750000e-01 0.000000000000000000e+00 0.000000000000000000e+00 2.066191162109375000e+03 9.821509122848510742e-01 3.000000000000000000e+00 6.353192749023437500e+02 -1.177500000000000000e+02 5.675000000000000000e+01
5.200000000000000000e+01 3.928615384615385437e+02 1.977949523925781250e+02 -7.649230957031250000e-01 0.000000000000000000e+00 0.000000000000000000e+00 2.088646972656250000e+03 8.100055456161499023e-01 4.000000000000000000e+00 3.481019897460937500e+02 -1.172500000000000000e+02 5.675000000000000000e+01
3.000000000000000000e+01 4.100923076923075428e+02 2.036791992187500000e+02 -7.972106933593750000e-01 0.000000000000000000e+00 0.000000000000000000e+00 2.111102783203125000e+03 7.969426512718200684e-01 3.000000000000000000e+00 6.282386474609375000e+02 -1.167500000000000000e+02 5.675000000000000000e+01
3.200000000000000000e+01 4.227153846153844370e+02 2.124671630859375000e+02 -8.294982910156250000e-01 0.000000000000000000e+00 8.823529481887817383e-01 2.133558593750000000e+03 7.837064266204833984e-01 3.000000000000000000e+00 6.901253051757812500e+02 -1.162500000000000000e+02 5.675000000000000000e+01
6.400000000000000000e+01 4.264384615384618655e+02 2.208876495361328125e+02 -8.983154296875000000e-01 0.000000000000000000e+00 0.000000000000000000e+00 2.144128417968750000e+03 7.877682447433471680e-01 4.000000000000000000e+00 6.908616943359375000e+02 -1.157500000000000000e+02 5.675000000000000000e+01
4.600000000000000000e+01 4.299846153846154948e+02 2.288690643310546875e+02 -1.035919189453125000e+00 9.999999776482582092e-03 5.882353186607360840e-01 2.165268310546875000e+03 8.000431060791015625e-01 4.000000000000000000e+00 7.196154785156250000e+02 -1.147500000000000000e+02 5.675000000000000000e+01
5.700000000000000000e+01 4.333307692307693060e+02 2.298825531005859375e+02 -1.115661621093750000e+00 9.999999776482582092e-03 0.000000000000000000e+00 2.172659667968750000e+03 1.408658862113952637e+00 4.000000000000000000e+00 7.054881591796875000e+02 -1.142500000000000000e+02 5.675000000000000000e+01
2.200000000000000000e+01 4.242923076923078725e+02 2.279756011962890625e+02 -1.228302001953125000e+00 0.000000000000000000e+00 7.058823704719543457e-01 2.170515869140625000e+03 8.488017320632934570e-01 3.000000000000000000e+00 5.139351806640625000e+02 -1.137500000000000000e+02 5.675000000000000000e+01
5.100000000000000000e+01 4.245846153846154039e+02 2.194317321777343750e+02 -1.340972900390625000e+00 0.000000000000000000e+00 0.000000000000000000e+00 2.168372070312500000e+03 1.771889805793762207e+00 4.000000000000000000e+00 5.051378784179687500e+02 -1.132500000000000000e+02 5.675000000000000000e+01
2.900000000000000000e+01 4.309384615384612971e+02 2.114120178222656250e+02 -1.453613281250000000e+00 0.000000000000000000e+00 0.000000000000000000e+00 2.166228271484375000e+03 1.963922023773193359e+00 3.000000000000000000e+00 4.784439697265625000e+02 -1.127500000000000000e+02 5.675000000000000000e+01
3.300000000000000000e+01 4.384923076923074632e+02 2.056430358886718750e+02 -1.588500976562500000e+00 9.999999776482582092e-03 0.000000000000000000e+00 2.157108642578125000e+03 1.974638223648071289e+00 3.000000000000000000e+00 4.786342773437500000e+02 -1.122500000000000000e+02 5.675000000000000000e+01
5.900000000000000000e+01 4.414769230769229011e+02 2.043950653076171875e+02 -1.745605468750000000e+00 9.999999776482582092e-03 9.411764740943908691e-01 2.141013183593750000e+03 1.912528514862060547e+00 4.000000000000000000e+00 4.962392272949218750e+02 -1.117500000000000000e+02 5.675000000000000000e+01
6.400000000000000000e+01 4.371846153846153129e+02 2.065232849121093750e+02 -1.902709960937500000e+00 0.000000000000000000e+00 4.705882370471954346e-01 2.124917724609375000e+03 2.002460956573486328e+00 4.000000000000000000e+00 3.916175842285156250e+02 -1.112500000000000000e+02 5.675000000000000000e+01
5.300000000000000000e+01 4.388461538461536406e+02 2.080594787597656250e+02 -2.059814453125000000e+00 9.999999776482582092e-03 0.000000000000000000e+00 2.108822265625000000e+03 1.991370201110839844e+00 4.000000000000000000e+00 4.098586425781250000e+02 -1.107500000000000000e+02 5.675000000000000000e+01
4.100000000000000000e+01 4.366538461538457909e+02 2.092561187744140625e+02 -2.277038574218750000e+00 9.999999776482582092e-03 2.941176593303680420e-01 2.083184082031250000e+03 1.963650465011596680e+00 3.000000000000000000e+00 4.836795959472656250e+02 -1.102500000000000000e+02 5.675000000000000000e+01
6.100000000000000000e+01 4.419384615384614676e+02 2.126550598144531250e+02 -2.514282226562500000e+00 9.999999776482582092e-03 7.058823704719543457e-01 2.054364746093750000e+03 1.946008920669555664e+00 4.000000000000000000e+00 3.883375854492187500e+02 -1.097500000000000000e+02 5.675000000000000000e+01
7.000000000000000000e+01 4.347846153846152788e+02 2.200259552001953125e+02 -2.751525878906250000e+00 9.999999776482582092e-03 8.823529481887817383e-01 2.025545532226562500e+03 1.941999077796936035e+00 4.000000000000000000e+00 4.347467346191406250e+02 -1.092500000000000000e+02 5.675000000000000000e+01
5.100000000000000000e+01 4.461230769230769511e+02 2.656887207031250000e+02 -3.423065185546875000e+00 1.092520207166671753e-01 5.882353186607360840e-01 1.946463623046875000e+03 1.908072471618652344e+00 4.000000000000000000e+00 4.732763061523437500e+02 -1.077500000000000000e+02 5.675000000000000000e+01
2.800000000000000000e+01 4.530615384615384755e+02 2.791433410644531250e+02 -3.640228271484375000e+00 1.128201112151145935e-01 1.058823585510253906e+00 1.921332275390625000e+03 1.890824675559997559e+00 3.000000000000000000e+00 4.864904479980468750e+02 -1.072500000000000000e+02 5.675000000000000000e+01
4.100000000000000000e+01 4.671769230769228898e+02 2.880640258789062500e+02 -3.829925537109375000e+00 1.720694899559020996e-01 9.411764740943908691e-01 1.898032104492187500e+03 1.879934787750244141e+00 3.000000000000000000e+00 5.725459594726562500e+02 -1.067500000000000000e+02 5.675000000000000000e+01
2.500000000000000000e+01 4.798769230769230489e+02 2.955856323242187500e+02 -3.937286376953125000e+00 1.654020547866821289e-01 9.411764740943908691e-01 1.880225341796875000e+03 1.866891860961914062e+00 3.000000000000000000e+00 5.427844848632812500e+02 -1.062500000000000000e+02 5.675000000000000000e+01
2.900000000000000000e+01 4.833461538461542091e+02 2.995864868164062500e+02 -4.044677734375000000e+00 1.800345033407211304e-01 5.294117927551269531e-01 1.862418457031250000e+03 1.855069398880004883e+00 3.000000000000000000e+00 5.403253784179687500e+02 -1.057500000000000000e+02 5.675000000000000000e+01
3.500000000000000000e+01 4.890461538461538566e+02 3.062185974121093750e+02 -4.152038574218750000e+00 1.952537894248962402e-01 8.823529481887817383e-01 1.844611694335937500e+03 1.852768421173095703e+00 3.000000000000000000e+00 5.247486572265625000e+02 -1.052500000000000000e+02 5.675000000000000000e+01
4.300000000000000000e+01 5.003538461538461775e+02 3.197544860839843750e+02 -4.243133544921875000e+00 2.078127712011337280e-01 1.058823585510253906e+00 1.831039794921875000e+03 1.843329310417175293e+00 3.000000000000000000e+00 4.846112060546875000e+02 -1.047500000000000000e+02 5.675000000000000000e+01
3.200000000000000000e+01 5.129615384615383391e+02 3.367129516601562500e+02 -4.317901611328125000e+00 1.989043354988098145e-01 5.882353186607360840e-01 1.821702636718750000e+03 1.830039978027343750e+00 3.000000000000000000e+00 4.010250244140625000e+02 -1.042500000000000000e+02 5.675000000000000000e+01
5.600000000000000000e+01 5.187999999999999545e+02 3.515463562011718750e+02 -4.392700195312500000e+00 1.941363364458084106e-01 8.823529481887817383e-01 1.812365600585937500e+03 1.818963170051574707e+00 4.000000000000000000e+00 3.819588012695312500e+02 -1.037500000000000000e+02 5.675000000000000000e+01
5.400000000000000000e+01 5.222384615384613653e+02 3.594412841796875000e+02 -4.467498779296875000e+00 2.442105859518051147e-01 1.000000000000000000e+00 1.803028564453125000e+03 1.807148933410644531e+00 4.000000000000000000e+00 4.035211791992187500e+02 -1.032500000000000000e+02 5.675000000000000000e+01
4.300000000000000000e+01 5.096307692307692605e+02 3.325089111328125000e+02 -4.665435791015625000e+00 2.663718461990356445e-01 0.000000000000000000e+00 1.782586547851562500e+03 1.799769520759582520e+00 3.000000000000000000e+00 3.496846313476562500e+02 -1.022500000000000000e+02 5.675000000000000000e+01
3.200000000000000000e+01 4.962615384615384073e+02 2.849113464355468750e+02 -4.870269775390625000e+00 3.280487358570098877e-01 6.470588445663452148e-01 1.761891967773437500e+03 1.811867952346801758e+00 3.000000000000000000e+00 3.763193054199218750e+02 -1.012500000000000000e+02 5.675000000000000000e+01
5.700000000000000000e+01 4.925307692307693515e+02 2.841690368652343750e+02 -5.013427734375000000e+00 3.084786534309387207e-01 5.294117927551269531e-01 1.751348388671875000e+03 1.822149157524108887e+00 4.000000000000000000e+00 3.164296875000000000e+02 -1.007500000000000000e+02 5.675000000000000000e+01
4.000000000000000000e+01 4.874230769230769056e+02 2.856107788085937500e+02 -5.156616210937500000e+00 3.212280571460723877e-01 2.941176593303680420e-01 1.740804809570312500e+03 1.829453229904174805e+00 3.000000000000000000e+00 2.859982910156250000e+02 -1.002500000000000000e+02 5.675000000000000000e+01
3.000000000000000000e+00 7.928230769230774513e+02 2.786210021972656250e+02 2.230590820312500000e+00 0.000000000000000000e+00 0.000000000000000000e+00 1.661344726562500000e+03 1.418226361274719238e+00 1.000000000000000000e+00 3.356635808944702148e+00 -1.582500000000000000e+02 5.725000000000000000e+01
1.800000000000000000e+01 7.968230769230765418e+02 2.811988525390625000e+02 2.127014160156250000e+00 0.000000000000000000e+00 0.000000000000000000e+00 1.687110961914062500e+03 1.401799917221069336e+00 1.000000000000000000e+00 7.856430053710937500e+00 -1.577500000000000000e+02 5.725000000000000000e+01
9.000000000000000000e+00 8.028692307692306258e+02 2.911051940917968750e+02 2.057708740234375000e+00 0.000000000000000000e+00 0.000000000000000000e+00 1.681320800781250000e+03 1.363577008247375488e+00 1.000000000000000000e+00 2.034709167480468750e+02 -1.572500000000000000e+02 5.725000000000000000e+01
1.000000000000000000e+00 8.226769230769228898e+02 3.093578186035156250e+02 2.022705078125000000e+00 0.000000000000000000e+00 0.000000000000000000e+00 1.643974121093750000e+03 1.351155042648315430e+00 1.000000000000000000e+00 4.606279296875000000e+02 -1.567500000000000000e+02 5.725000000000000000e+01
1.000000000000000000e+00 1.017161538461538385e+03 6.596281738281250000e+02 -1.707977294921875000e+00 2.963816821575164795e-01 0.000000000000000000e+00 9.688404541015625000e+02 1.019819498062133789e+00 1.000000000000000000e+00 9.131657104492187500e+02 -1.317500000000000000e+02 5.725000000000000000e+01
3.000000000000000000e+00 7.961538461538464162e+02 6.227647094726562500e+02 -3.048828125000000000e+00 2.234651446342468262e-01 0.000000000000000000e+00 8.928980712890625000e+02 1.065313100814819336e+00 1.000000000000000000e+00 1.594329956054687500e+03 -1.307500000000000000e+02 5.725000000000000000e+01
4.000000000000000000e+00 6.278769230769232763e+02 4.875441589355468750e+02 -4.407867431640625000e+00 2.452850788831710815e-01 0.000000000000000000e+00 8.418760375976562500e+02 1.112051844596862793e+00 1.000000000000000000e+00 1.424351074218750000e+03 -1.297500000000000000e+02 5.725000000000000000e+01
5.900000000000000000e+01 5.330307692307692378e+02 4.039462585449218750e+02 -5.480194091796875000e+00 1.809304654598236084e-01 0.000000000000000000e+00 7.762827758789062500e+02 1.080671906471252441e+00 4.000000000000000000e+00 1.343769165039062500e+03 -1.287500000000000000e+02 5.725000000000000000e+01
7.000000000000000000e+00 4.863461538461537543e+02 3.544927368164062500e+02 -5.930358886718750000e+00 6.053611040115356445e-01 0.000000000000000000e+00 7.391148681640625000e+02 7.237938046455383301e-01 1.000000000000000000e+00 1.649273681640625000e+03 -1.282500000000000000e+02 5.725000000000000000e+01
3.000000000000000000e+01 4.544923076923075200e+02 2.750342407226562500e+02 -6.380493164062500000e+00 1.798716932535171509e-01 0.000000000000000000e+00 7.019468994140625000e+02 6.843717098236083984e-01 3.000000000000000000e+00 1.500064575195312500e+03 -1.277500000000000000e+02 5.725000000000000000e+01
1.000000000000000000e+01 4.349000000000000341e+02 2.247291870117187500e+02 -6.428924560546875000e+00 3.637582957744598389e-01 0.000000000000000000e+00 7.453228759765625000e+02 5.490740537643432617e-01 1.000000000000000000e+00 1.274034057617187500e+03 -1.267500000000000000e+02 5.725000000000000000e+01
2.000000000000000000e+00 4.536923076923075655e+02 2.349074401855468750e+02 -6.311187744140625000e+00 7.842121124267578125e-01 0.000000000000000000e+00 7.866294555664062500e+02 5.454359650611877441e-01 1.000000000000000000e+00 1.788893554687500000e+03 -1.262500000000000000e+02 5.725000000000000000e+01
2.500000000000000000e+01 4.643384615384613880e+02 2.783491516113281250e+02 -6.193420410156250000e+00 5.868690609931945801e-01 0.000000000000000000e+00 8.279360961914062500e+02 8.186552524566650391e-01 3.000000000000000000e+00 1.422997436523437500e+03 -1.257500000000000000e+02 5.725000000000000000e+01
5.400000000000000000e+01 4.738846153846151878e+02 3.157766723632812500e+02 -5.735565185546875000e+00 9.999999776482582092e-03 0.000000000000000000e+00 9.258630371093750000e+02 1.515167355537414551e+00 4.000000000000000000e+00 9.387832641601562500e+02 -1.252500000000000000e+02 5.725000000000000000e+01
4.000000000000000000e+00 5.187307692307691696e+02 3.263305969238281250e+02 -5.164306640625000000e+00 5.606896877288818359e-01 0.000000000000000000e+00 1.042663452148437500e+03 7.478442788124084473e-01 1.000000000000000000e+00 1.608623046875000000e+03 -1.247500000000000000e+02 5.725000000000000000e+01
4.000000000000000000e+00 5.512769230769230262e+02 3.198932495117187500e+02 -4.593078613281250000e+00 6.853703260421752930e-01 0.000000000000000000e+00 1.159463745117187500e+03 6.690307259559631348e-01 1.000000000000000000e+00 1.664343994140625000e+03 -1.242500000000000000e+02 5.725000000000000000e+01
2.700000000000000000e+01 5.601538461538460751e+02 3.110429382324218750e+02 -4.021850585937500000e+00 5.458564758300781250e-01 0.000000000000000000e+00 1.276264160156250000e+03 6.398625969886779785e-01 3.000000000000000000e+00 1.508186889648437500e+03 -1.237500000000000000e+02 5.725000000000000000e+01
6.000000000000000000e+01 5.401923076923076223e+02 2.730484313964843750e+02 -3.001159667968750000e+00 9.999999776482582092e-03 0.000000000000000000e+00 1.479952392578125000e+03 1.722668290138244629e+00 4.000000000000000000e+00 9.767594604492187500e+02 -1.227500000000000000e+02 5.725000000000000000e+01
7.000000000000000000e+01 5.181923076923078497e+02 2.540864257812500000e+02 -2.490844726562500000e+00 9.999999776482582092e-03 0.000000000000000000e+00 1.581796630859375000e+03 1.814314723014831543e+00 4.000000000000000000e+00 1.018516357421875000e+03 -1.222500000000000000e+02 5.725000000000000000e+01
5.200000000000000000e+01 4.986230769230770647e+02 2.397646636962890625e+02 -2.047119140625000000e+00 0.000000000000000000e+00 7.058823704719543457e-01 1.675483276367187500e+03 1.848354816436767578e+00 4.000000000000000000e+00 8.012402954101562500e+02 -1.217500000000000000e+02 5.725000000000000000e+01
6.600000000000000000e+01 4.727384615384614790e+02 2.354300079345703125e+02 -1.803344726562500000e+00 0.000000000000000000e+00 2.941176593303680420e-01 1.744697509765625000e+03 9.383761286735534668e-01 4.000000000000000000e+00 7.522522583007812500e+02 -1.212500000000000000e+02 5.725000000000000000e+01
3.000000000000000000e+01 4.593307692307695334e+02 2.329232177734375000e+02 -1.559570312500000000e+00 9.999999776482582092e-03 0.000000000000000000e+00 1.813911621093750000e+03 7.473849654197692871e-01 3.000000000000000000e+00 8.090541381835937500e+02 -1.207500000000000000e+02 5.725000000000000000e+01
4.900000000000000000e+01 4.495153846153846757e+02 2.340640106201171875e+02 -1.315795898437500000e+00 9.999999776482582092e-03 0.000000000000000000e+00 1.883125854492187500e+03 9.174457788467407227e-01 4.000000000000000000e+00 8.142835693359375000e+02 -1.202500000000000000e+02 5.725000000000000000e+01
4.700000000000000000e+01 4.357384615384614222e+02 2.358860168457031250e+02 -1.181152343750000000e+00 9.999999776482582092e-03 2.941176593303680420e-01 1.937241210937500000e+03 7.334483861923217773e-01 4.000000000000000000e+00 7.583030395507812500e+02 -1.197500000000000000e+02 5.725000000000000000e+01
3.200000000000000000e+01 4.355923076923076565e+02 2.289242401123046875e+02 -1.155700683593750000e+00 9.999999776482582092e-03 3.529411852359771729e-01 1.976257812500000000e+03 7.660617828369140625e-01 3.000000000000000000e+00 7.299092407226562500e+02 -1.192500000000000000e+02 5.725000000000000000e+01
5.300000000000000000e+01 4.319769230769229011e+02 2.144884033203125000e+02 -1.130249023437500000e+00 1.092151105403900146e-01 3.529411852359771729e-01 2.015274291992187500e+03 7.785140275955200195e-01 4.000000000000000000e+00 9.175413818359375000e+02 -1.187500000000000000e+02 5.725000000000000000e+01
5.100000000000000000e+01 4.231769230769231740e+02 2.041953125000000000e+02 -1.104766845703125000e+00 9.999999776482582092e-03 0.000000000000000000e+00 2.054290771484375000e+03 1.429694414138793945e+00 4.000000000000000000e+00 7.349125976562500000e+02 -1.182500000000000000e+02 5.725000000000000000e+01
6.500000000000000000e+01 4.134923076923075769e+02 1.995298767089843750e+02 -1.141296386718750000e+00 9.999999776482582092e-03 3.529411852359771729e-01 2.076924316406250000e+03 7.774406671524047852e-01 4.000000000000000000e+00 6.025260009765625000e+02 -1.177500000000000000e+02 5.725000000000000000e+01
3.000000000000000000e+00 3.970692307692309555e+02 2.003251800537109375e+02 -1.198516845703125000e+00 0.000000000000000000e+00 5.882353186607360840e-01 2.094096923828125000e+03 8.030723333358764648e-01 1.000000000000000000e+00 4.407807312011718750e+02 -1.172500000000000000e+02 5.725000000000000000e+01
6.900000000000000000e+01 3.949615384615382254e+02 2.064338073730468750e+02 -1.255706787109375000e+00 0.000000000000000000e+00 0.000000000000000000e+00 2.111269531250000000e+03 8.041981458663940430e-01 4.000000000000000000e+00 4.535745239257812500e+02 -1.167500000000000000e+02 5.725000000000000000e+01
3.100000000000000000e+01 4.072846153846152788e+02 2.166608734130859375e+02 -1.312927246093750000e+00 0.000000000000000000e+00 0.000000000000000000e+00 2.128441894531250000e+03 7.829721570014953613e-01 3.000000000000000000e+00 5.714693603515625000e+02 -1.162500000000000000e+02 5.725000000000000000e+01
6.500000000000000000e+01 4.170307692307690672e+02 2.238367309570312500e+02 -1.386901855468750000e+00 9.999999776482582092e-03 1.117647051811218262e+00 2.133804443359375000e+03 1.548531293869018555e+00 4.000000000000000000e+00 8.039204101562500000e+02 -1.157500000000000000e+02 5.725000000000000000e+01
5.800000000000000000e+01 3.993384615384616723e+02 2.266057586669921875e+02 -1.460906982421875000e+00 0.000000000000000000e+00 5.882352963089942932e-02 2.139166992187500000e+03 8.517199158668518066e-01 4.000000000000000000e+00 4.462573852539062500e+02 -1.152500000000000000e+02 5.725000000000000000e+01
3.000000000000000000e+01 4.067769230769230830e+02 2.304970397949218750e+02 -1.534881591796875000e+00 0.000000000000000000e+00 0.000000000000000000e+00 2.144529296875000000e+03 7.995811700820922852e-01 3.000000000000000000e+00 5.153255004882812500e+02 -1.147500000000000000e+02 5.725000000000000000e+01
5.700000000000000000e+01 4.196999999999997613e+02 2.299125213623046875e+02 -1.618652343750000000e+00 9.999999776482582092e-03 5.882352963089942932e-02 2.146578857421875000e+03 1.899190902709960938e+00 4.000000000000000000e+00 6.795982666015625000e+02 -1.142500000000000000e+02 5.725000000000000000e+01
2.400000000000000000e+01 4.296846153846154834e+02 2.253723907470703125e+02 -1.731781005859375000e+00 1.036000922322273254e-01 8.823529481887817383e-01 2.138689697265625000e+03 1.717844128608703613e+00 3.000000000000000000e+00 7.502262573242187500e+02 -1.137500000000000000e+02 5.725000000000000000e+01
5.000000000000000000e+01 4.315384615384615472e+02 2.141341247558593750e+02 -1.844940185546875000e+00 1.399219334125518799e-01 8.823529481887817383e-01 2.130800292968750000e+03 1.854634881019592285e+00 4.000000000000000000e+00 7.818308105468750000e+02 -1.132500000000000000e+02 5.725000000000000000e+01
6.800000000000000000e+01 4.310538461538459956e+02 2.072859191894531250e+02 -1.958068847656250000e+00 9.999999776482582092e-03 2.941176593303680420e-01 2.122911132812500000e+03 1.777912497520446777e+00 4.000000000000000000e+00 6.038594970703125000e+02 -1.127500000000000000e+02 5.725000000000000000e+01
4.600000000000000000e+01 4.273307692307692491e+02 2.025727081298828125e+02 -2.078735351562500000e+00 9.999999776482582092e-03 0.000000000000000000e+00 2.110524414062500000e+03 1.193213224411010742e+00 4.000000000000000000e+00 5.296632080078125000e+02 -1.122500000000000000e+02 5.725000000000000000e+01
4.100000000000000000e+01 4.064615384615384528e+02 2.017117156982421875e+02 -2.206939697265625000e+00 9.999999776482582092e-03 5.294117927551269531e-01 2.093640625000000000e+03 9.205346107482910156e-01 3.000000000000000000e+00 2.971378173828125000e+02 -1.117500000000000000e+02 5.725000000000000000e+01
5.100000000000000000e+01 4.230692307692310123e+02 2.027214202880859375e+02 -2.335174560546875000e+00 9.999999776482582092e-03 1.000000000000000000e+00 2.076756835937500000e+03 1.498359918594360352e+00 4.000000000000000000e+00 3.371441345214843750e+02 -1.112500000000000000e+02 5.725000000000000000e+01
6.000000000000000000e+01 4.377692307692307736e+02 2.053214416503906250e+02 -2.463378906250000000e+00 1.202324405312538147e-01 2.352941185235977173e-01 2.059873046875000000e+03 1.933031916618347168e+00 4.000000000000000000e+00 5.703735961914062500e+02 -1.107500000000000000e+02 5.725000000000000000e+01
2.900000000000000000e+01 4.449076923076920593e+02 2.209482727050781250e+02 -2.843505859375000000e+00 1.095169335603713989e-01 1.352941155433654785e+00 2.005999267578125000e+03 1.831049799919128418e+00 3.000000000000000000e+00 5.242561035156250000e+02 -1.097500000000000000e+02 5.725000000000000000e+01
3.100000000000000000e+01 4.349230769230770193e+02 2.371553955078125000e+02 -3.042419433593750000e+00 1.078123003244400024e-01 5.882353186607360840e-01 1.977626220703125000e+03 1.807619810104370117e+00 3.000000000000000000e+00 4.911202697753906250e+02 -1.092500000000000000e+02 5.725000000000000000e+01
2.700000000000000000e+01 4.401153846153846985e+02 2.563845520019531250e+02 -3.241302490234375000e+00 1.166883781552314758e-01 0.000000000000000000e+00 1.949253173828125000e+03 1.878344058990478516e+00 3.000000000000000000e+00 4.808979492187500000e+02 -1.087500000000000000e+02 5.725000000000000000e+01
3.200000000000000000e+01 4.412923076923075882e+02 2.774743957519531250e+02 -3.442993164062500000e+00 1.356689333915710449e-01 0.000000000000000000e+00 1.922935791015625000e+03 1.869140625000000000e+00 3.000000000000000000e+00 4.913801269531250000e+02 -1.082500000000000000e+02 5.725000000000000000e+01
2.800000000000000000e+01 4.430769230769231513e+02 2.992239074707031250e+02 -3.644683837890625000e+00 1.592159271240234375e-01 5.882353186607360840e-01 1.896618408203125000e+03 1.858438372611999512e+00 3.000000000000000000e+00 5.141320800781250000e+02 -1.077500000000000000e+02 5.725000000000000000e+01
2.900000000000000000e+01 4.492461538461539590e+02 3.114116821289062500e+02 -3.846374511718750000e+00 2.012929320335388184e-01 5.882353186607360840e-01 1.870300903320312500e+03 1.857676625251770020e+00 3.000000000000000000e+00 5.131028442382812500e+02 -1.072500000000000000e+02 5.725000000000000000e+01
2.800000000000000000e+01 4.496076923076922753e+02 3.144537048339843750e+02 -4.030639648437500000e+00 1.642647832632064819e-01 0.000000000000000000e+00 1.845354248046875000e+03 1.871420621871948242e+00 3.000000000000000000e+00 5.081317749023437500e+02 -1.067500000000000000e+02 5.725000000000000000e+01
1.800000000000000000e+01 4.721923076923078497e+02 2.919736022949218750e+02 -4.294525146484375000e+00 2.123487591743469238e-01 8.235294222831726074e-01 1.803685424804687500e+03 1.839838862419128418e+00 1.000000000000000000e+00 5.100896301269531250e+02 -1.057500000000000000e+02 5.725000000000000000e+01
4.100000000000000000e+01 4.847000000000001023e+02 2.951133422851562500e+02 -4.426452636718750000e+00 2.508226037025451660e-01 8.823529481887817383e-01 1.782850952148437500e+03 1.821170210838317871e+00 3.000000000000000000e+00 5.109584655761718750e+02 -1.052500000000000000e+02 5.725000000000000000e+01
5.500000000000000000e+01 4.938923076923077815e+02 3.062112121582031250e+02 -4.548400878906250000e+00 2.484973073005676270e-01 9.411764740943908691e-01 1.765998779296875000e+03 1.809492468833923340e+00 4.000000000000000000e+00 4.891086425781250000e+02 -1.047500000000000000e+02 5.725000000000000000e+01
3.400000000000000000e+01 5.164615384615387939e+02 3.357155151367187500e+02 -4.772308349609375000e+00 2.858597636222839355e-01 9.411764740943908691e-01 1.740259033203125000e+03 1.787099599838256836e+00 3.000000000000000000e+00 4.202059326171875000e+02 -1.037500000000000000e+02 5.725000000000000000e+01
4.500000000000000000e+01 5.203461538461538112e+02 3.438583679199218750e+02 -4.884246826171875000e+00 2.888066470623016357e-01 5.294117927551269531e-01 1.727389282226562500e+03 1.779579877853393555e+00 4.000000000000000000e+00 3.677455444335937500e+02 -1.032500000000000000e+02 5.725000000000000000e+01
3.700000000000000000e+01 4.659769230769230148e+02 2.937352294921875000e+02 -5.413909912109375000e+00 4.223720431327819824e-01 1.058823585510253906e+00 1.671320068359375000e+03 1.775347471237182617e+00 3.000000000000000000e+00 3.808107299804687500e+02 -1.012500000000000000e+02 5.725000000000000000e+01
4.200000000000000000e+01 4.710384615384616609e+02 2.934178771972656250e+02 -5.555847167968750000e+00 4.408752918243408203e-01 7.058823704719543457e-01 1.660681396484375000e+03 1.764027833938598633e+00 3.000000000000000000e+00 3.758079833984375000e+02 -1.007500000000000000e+02 5.725000000000000000e+01
4.500000000000000000e+01 4.711384615384616268e+02 2.938200683593750000e+02 -5.697784423828125000e+00 4.422301948070526123e-01 4.705882370471954346e-01 1.650042724609375000e+03 1.757805466651916504e+00 4.000000000000000000e+00 3.178501586914062500e+02 -1.002500000000000000e+02 5.725000000000000000e+01
1.500000000000000000e+01 7.264307692307694424e+02 2.802866210937500000e+02 9.356079101562500000e-01 0.000000000000000000e+00 0.000000000000000000e+00 1.557641357421875000e+03 1.432432770729064941e+00 1.000000000000000000e+00 3.101769638061523438e+01 -1.572500000000000000e+02 5.775000000000000000e+01
1.600000000000000000e+01 8.086769230769233445e+02 6.375072631835937500e+02 -2.780792236328125000e+00 0.000000000000000000e+00 0.000000000000000000e+00 8.398377075195312500e+02 5.685123801231384277e-01 1.000000000000000000e+00 7.040192871093750000e+02 -1.317500000000000000e+02 5.775000000000000000e+01
1.400000000000000000e+01 6.991230769230771784e+02 5.925213012695312500e+02 -3.242675781250000000e+00 4.293200075626373291e-01 5.882352963089942932e-02 8.740298461914062500e+02 6.021037101745605469e-01 1.000000000000000000e+00 1.606287597656250000e+03 -1.312500000000000000e+02 5.775000000000000000e+01
9.000000000000000000e+00 6.004923076923075769e+02 5.451126708984375000e+02 -3.920196533203125000e+00 5.030638575553894043e-01 2.941176593303680420e-01 8.476970825195312500e+02 6.018102765083312988e-01 1.000000000000000000e+00 1.629610107421875000e+03 -1.307500000000000000e+02 5.775000000000000000e+01
5.000000000000000000e+00 5.084461538461537202e+02 4.785816040039062500e+02 -4.597717285156250000e+00 6.477863788604736328e-01 2.352941185235977173e-01 8.213643798828125000e+02 6.032791137695312500e-01 1.000000000000000000e+00 1.761651733398437500e+03 -1.302500000000000000e+02 5.775000000000000000e+01
4.200000000000000000e+01 4.862999999999998408e+02 4.247384643554687500e+02 -5.275238037109375000e+00 1.912650316953659058e-01 0.000000000000000000e+00 7.950316772460937500e+02 6.740520596504211426e-01 3.000000000000000000e+00 1.272705810546875000e+03 -1.297500000000000000e+02 5.775000000000000000e+01
1.000000000000000000e+01 4.800000000000001137e+02 3.747461853027343750e+02 -5.871856689453125000e+00 4.689984321594238281e-01 0.000000000000000000e+00 7.668782348632812500e+02 5.674309134483337402e-01 1.000000000000000000e+00 1.492357055664062500e+03 -1.292500000000000000e+02 5.775000000000000000e+01
6.000000000000000000e+00 4.715692307692307850e+02 3.275289001464843750e+02 -6.225891113281250000e+00 6.591874361038208008e-01 6.470588445663452148e-01 7.332626342773437500e+02 5.786578655242919922e-01 1.000000000000000000e+00 1.782851928710937500e+03 -1.287500000000000000e+02 5.775000000000000000e+01
2.300000000000000000e+01 4.313769230769231058e+02 2.669116516113281250e+02 -6.933898925781250000e+00 5.586418509483337402e-01 5.882353186607360840e-01 6.660313720703125000e+02 5.554828047752380371e-01 3.000000000000000000e+00 1.301942871093750000e+03 -1.277500000000000000e+02 5.775000000000000000e+01
3.500000000000000000e+01 4.281769230769231740e+02 2.389343109130859375e+02 -7.038604736328125000e+00 1.756360083818435669e-01 0.000000000000000000e+00 6.659760742187500000e+02 8.410159945487976074e-01 3.000000000000000000e+00 1.378708374023437500e+03 -1.272500000000000000e+02 5.775000000000000000e+01
1.000000000000000000e+00 4.398461538461539249e+02 2.200655975341796875e+02 -6.894012451171875000e+00 5.093196630477905273e-01 0.000000000000000000e+00 6.994810791015625000e+02 7.669181823730468750e-01 1.000000000000000000e+00 1.635110595703125000e+03 -1.267500000000000000e+02 5.775000000000000000e+01
4.000000000000000000e+00 4.421230769230770647e+02 2.167504730224609375e+02 -6.749420166015625000e+00 6.313540935516357422e-01 0.000000000000000000e+00 7.329860839843750000e+02 5.777336955070495605e-01 1.000000000000000000e+00 1.693020507812500000e+03 -1.262500000000000000e+02 5.775000000000000000e+01
5.400000000000000000e+01 4.608692307692306258e+02 2.276376190185546875e+02 -6.604858398437500000e+00 2.780036330223083496e-01 0.000000000000000000e+00 7.664911499023437500e+02 5.900778174400329590e-01 4.000000000000000000e+00 1.129942382812500000e+03 -1.257500000000000000e+02 5.775000000000000000e+01
5.800000000000000000e+01 4.973769230769231058e+02 2.453249969482421875e+02 -6.082977294921875000e+00 9.999999776482582092e-03 0.000000000000000000e+00 8.815812377929687500e+02 7.761039733886718750e-01 4.000000000000000000e+00 1.215160278320312500e+03 -1.252500000000000000e+02 5.775000000000000000e+01
3.500000000000000000e+01 5.307692307692308304e+02 2.594459533691406250e+02 -5.435333251953125000e+00 4.888038337230682373e-01 0.000000000000000000e+00 1.023866394042968750e+03 8.156123161315917969e-01 3.000000000000000000e+00 1.838813842773437500e+03 -1.247500000000000000e+02 5.775000000000000000e+01
8.000000000000000000e+00 5.484923076923080316e+02 2.670845642089843750e+02 -4.787689208984375000e+00 9.999999776482582092e-03 0.000000000000000000e+00 1.166151611328125000e+03 8.918290138244628906e-01 1.000000000000000000e+00 1.764339965820312500e+03 -1.242500000000000000e+02 5.775000000000000000e+01
2.900000000000000000e+01 5.386230769230768374e+02 2.670494079589843750e+02 -4.140045166015625000e+00 5.423872470855712891e-01 5.882352963089942932e-02 1.308436767578125000e+03 6.262713074684143066e-01 3.000000000000000000e+00 1.342520629882812500e+03 -1.237500000000000000e+02 5.775000000000000000e+01
6.100000000000000000e+01 5.233307692307694197e+02 2.600173034667968750e+02 -3.665802001953125000e+00 9.999999776482582092e-03 0.000000000000000000e+00 1.406176513671875000e+03 1.339507102966308594e+00 4.000000000000000000e+00 7.947628173828125000e+02 -1.232500000000000000e+02 5.775000000000000000e+01
5.000000000000000000e+01 5.057615384615384073e+02 2.481333160400390625e+02 -3.191528320312500000e+00 0.000000000000000000e+00 0.000000000000000000e+00 1.503916381835937500e+03 1.127241969108581543e+00 4.000000000000000000e+00 7.676683959960937500e+02 -1.227500000000000000e+02 5.775000000000000000e+01
4.700000000000000000e+01 4.852923076923076451e+02 2.381085052490234375e+02 -2.717285156250000000e+00 0.000000000000000000e+00 0.000000000000000000e+00 1.601656127929687500e+03 9.020351767539978027e-01 4.000000000000000000e+00 6.518910522460937500e+02 -1.222500000000000000e+02 5.775000000000000000e+01
6.300000000000000000e+01 4.652692307692310578e+02 2.320787963867187500e+02 -2.304199218750000000e+00 0.000000000000000000e+00 0.000000000000000000e+00 1.692474121093750000e+03 8.282007575035095215e-01 4.000000000000000000e+00 7.376951904296875000e+02 -1.217500000000000000e+02 5.775000000000000000e+01
6.000000000000000000e+01 4.512461538461537884e+02 2.300938873291015625e+02 -2.074676513671875000e+00 9.999999776482582092e-03 0.000000000000000000e+00 1.762526489257812500e+03 9.609574079513549805e-01 4.000000000000000000e+00 6.850808105468750000e+02 -1.212500000000000000e+02 5.775000000000000000e+01
5.200000000000000000e+01 4.421692307692307509e+02 2.317936248779296875e+02 -1.845123291015625000e+00 9.999999776482582092e-03 5.882352963089942932e-02 1.832578857421875000e+03 1.127763986587524414e+00 4.000000000000000000e+00 6.186144409179687500e+02 -1.207500000000000000e+02 5.775000000000000000e+01
6.200000000000000000e+01 4.372153846153847780e+02 2.351145172119140625e+02 -1.615570068359375000e+00 9.999999776482582092e-03 2.352941185235977173e-01 1.902631225585937500e+03 8.713065981864929199e-01 4.000000000000000000e+00 6.974038696289062500e+02 -1.202500000000000000e+02 5.775000000000000000e+01
2.800000000000000000e+01 4.330538461538459387e+02 2.353929443359375000e+02 -1.499145507812500000e+00 1.401926279067993164e-01 6.470588445663452148e-01 1.956468505859375000e+03 1.722680926322937012e+00 3.000000000000000000e+00 9.127709350585937500e+02 -1.197500000000000000e+02 5.775000000000000000e+01
3.800000000000000000e+01 4.290769230769231513e+02 2.285574951171875000e+02 -1.495819091796875000e+00 9.999999776482582092e-03 0.000000000000000000e+00 1.994090820312500000e+03 7.283022999763488770e-01 3.000000000000000000e+00 7.612780761718750000e+02 -1.192500000000000000e+02 5.775000000000000000e+01
3.700000000000000000e+01 4.273307692307689649e+02 2.178316650390625000e+02 -1.492523193359375000e+00 9.999999776482582092e-03 0.000000000000000000e+00 2.031713012695312500e+03 7.499065399169921875e-01 3.000000000000000000e+00 5.481998291015625000e+02 -1.187500000000000000e+02 5.775000000000000000e+01
5.900000000000000000e+01 4.305769230769231513e+02 2.083454284667968750e+02 -1.489196777343750000e+00 9.999999776482582092e-03 0.000000000000000000e+00 2.069335205078125000e+03 7.633247375488281250e-01 4.000000000000000000e+00 6.836484375000000000e+02 -1.182500000000000000e+02 5.775000000000000000e+01
1.100000000000000000e+01 4.270538461538460524e+02 2.016386108398437500e+02 -1.549957275390625000e+00 9.999999776482582092e-03 1.176470637321472168e+00 2.087657714843750000e+03 7.799261808395385742e-01 1.000000000000000000e+00 4.175655822753906250e+02 -1.177500000000000000e+02 5.775000000000000000e+01
2.300000000000000000e+01 4.012461538461537884e+02 1.986123962402343750e+02 -1.632080078125000000e+00 0.000000000000000000e+00 5.294117927551269531e-01 2.099546875000000000e+03 8.007909059524536133e-01 3.000000000000000000e+00 3.594786376953125000e+02 -1.172500000000000000e+02 5.775000000000000000e+01
6.200000000000000000e+01 3.876923076923077360e+02 1.994416046142578125e+02 -1.714202880859375000e+00 0.000000000000000000e+00 1.117647051811218262e+00 2.111436279296875000e+03 8.027375936508178711e-01 4.000000000000000000e+00 4.105360412597656250e+02 -1.167500000000000000e+02 5.775000000000000000e+01
6.200000000000000000e+01 3.985461538461539703e+02 2.054399871826171875e+02 -1.796325683593750000e+00 1.076871231198310852e-01 5.882352963089942932e-02 2.123325439453125000e+03 7.808768153190612793e-01 4.000000000000000000e+00 7.328495483398437500e+02 -1.162500000000000000e+02 5.775000000000000000e+01
5.800000000000000000e+01 4.079769230769231854e+02 2.124262695312500000e+02 -1.875518798828125000e+00 1.237134560942649841e-01 0.000000000000000000e+00 2.123480468750000000e+03 7.703679800033569336e-01 4.000000000000000000e+00 7.766375122070312500e+02 -1.157500000000000000e+02 5.775000000000000000e+01
4.800000000000000000e+01 3.935230769230768715e+02 2.169663085937500000e+02 -1.954681396484375000e+00 0.000000000000000000e+00 2.352941185235977173e-01 2.123635498046875000e+03 7.903667092323303223e-01 4.000000000000000000e+00 3.590269775390625000e+02 -1.152500000000000000e+02 5.775000000000000000e+01
4.700000000000000000e+01 3.915461538461538566e+02 2.184765625000000000e+02 -2.033874511718750000e+00 0.000000000000000000e+00 0.000000000000000000e+00 2.123790527343750000e+03 1.016253829002380371e+00 4.000000000000000000e+00 3.872422790527343750e+02 -1.147500000000000000e+02 5.775000000000000000e+01
4.600000000000000000e+01 3.920307692307692946e+02 2.151854705810546875e+02 -2.121643066406250000e+00 9.999999776482582092e-03 5.882352963089942932e-02 2.120498291015625000e+03 7.915457487106323242e-01 4.000000000000000000e+00 4.095000000000000000e+02 -1.142500000000000000e+02 5.775000000000000000e+01
4.100000000000000000e+01 4.060000000000002274e+02 2.081214141845703125e+02 -2.235260009765625000e+00 9.999999776482582092e-03 5.882352963089942932e-02 2.106863281250000000e+03 1.138409733772277832e+00 3.000000000000000000e+00 5.785454711914062500e+02 -1.137500000000000000e+02 5.775000000000000000e+01
3.800000000000000000e+01 4.175615384615384755e+02 1.990290527343750000e+02 -2.348907470703125000e+00 1.372101604938507080e-01 0.000000000000000000e+00 2.093228515625000000e+03 1.841278553009033203e+00 3.000000000000000000e+00 6.724682006835937500e+02 -1.132500000000000000e+02 5.775000000000000000e+01
3.500000000000000000e+01 4.250307692307688967e+02 1.968849182128906250e+02 -2.462524414062500000e+00 1.547920703887939453e-01 5.882353186607360840e-01 2.079593750000000000e+03 1.807643413543701172e+00 3.000000000000000000e+00 6.743713989257812500e+02 -1.127500000000000000e+02 5.775000000000000000e+01
4.500000000000000000e+01 4.280615384615384187e+02 1.970266113281250000e+02 -2.568969726562500000e+00 2.051587253808975220e-01 0.000000000000000000e+00 2.063940185546875000e+03 1.843355894088745117e+00 4.000000000000000000e+00 7.484093017578125000e+02 -1.122500000000000000e+02 5.775000000000000000e+01
4.800000000000000000e+01 3.996538461538461320e+02 1.965950927734375000e+02 -2.668304443359375000e+00 9.999999776482582092e-03 2.352941185235977173e-01 2.046268066406250000e+03 1.187364935874938965e+00 4.000000000000000000e+00 3.531981201171875000e+02 -1.117500000000000000e+02 5.775000000000000000e+01
2.400000000000000000e+01 4.018692307692306258e+02 1.967681732177734375e+02 -2.767639160156250000e+00 9.999999776482582092e-03 8.235294222831726074e-01 2.028595947265625000e+03 1.890872597694396973e+00 3.000000000000000000e+00 2.874864501953125000e+02 -1.112500000000000000e+02 5.775000000000000000e+01
3.700000000000000000e+01 4.068615384615383732e+02 1.977231750488281250e+02 -2.866943359375000000e+00 9.999999776482582092e-03 5.882353186607360840e-01 2.010923828125000000e+03 1.959787249565124512e+00 3.000000000000000000e+00 3.144049072265625000e+02 -1.107500000000000000e+02 5.775000000000000000e+01
2.800000000000000000e+01 4.203230769230768828e+02 2.014634857177734375e+02 -3.012207031250000000e+00 9.999999776482582092e-03 8.823529481887817383e-01 1.985560546875000000e+03 1.914776682853698730e+00 3.000000000000000000e+00 3.781493225097656250e+02 -1.102500000000000000e+02 5.775000000000000000e+01
2.200000000000000000e+01 4.385923076923075996e+02 2.130251617431640625e+02 -3.172760009765625000e+00 1.587763726711273193e-01 7.058823704719543457e-01 1.957633666992187500e+03 1.870482683181762695e+00 3.000000000000000000e+00 4.971483459472656250e+02 -1.097500000000000000e+02 5.775000000000000000e+01
3.200000000000000000e+01 4.349615384615383959e+02 2.317527923583984375e+02 -3.333312988281250000e+00 1.688603162765502930e-01 7.058823704719543457e-01 1.929706787109375000e+03 1.849941968917846680e+00 3.000000000000000000e+00 5.472156982421875000e+02 -1.092500000000000000e+02 5.775000000000000000e+01
3.000000000000000000e+01 4.328461538461538680e+02 2.539479217529296875e+02 -3.493865966796875000e+00 1.842788755893707275e-01 5.882352963089942932e-02 1.901780029296875000e+03 1.837812662124633789e+00 3.000000000000000000e+00 5.287326660156250000e+02 -1.087500000000000000e+02 5.775000000000000000e+01
2.400000000000000000e+01 4.370384615384615472e+02 2.831225585937500000e+02 -3.680084228515625000e+00 1.982862651348114014e-01 1.117647051811218262e+00 1.874276489257812500e+03 1.807712554931640625e+00 3.000000000000000000e+00 5.321732177734375000e+02 -1.082500000000000000e+02 5.775000000000000000e+01
1.800000000000000000e+01 4.365615384615385324e+02 3.168639221191406250e+02 -4.052551269531250000e+00 2.438279986381530762e-01 7.058823704719543457e-01 1.819269653320312500e+03 1.827819585800170898e+00 1.000000000000000000e+00 5.271271972656250000e+02 -1.072500000000000000e+02 5.775000000000000000e+01
2.700000000000000000e+01 4.558307692307693060e+02 2.958060913085937500e+02 -4.544372558593750000e+00 2.948631048202514648e-01 1.058823585510253906e+00 1.744952270507812500e+03 1.810978531837463379e+00 3.000000000000000000e+00 5.389927368164062500e+02 -1.057500000000000000e+02 5.775000000000000000e+01
2.500000000000000000e+01 4.766615384615384983e+02 2.959395446777343750e+02 -4.700897216796875000e+00 3.586188554763793945e-01 8.823529481887817383e-01 1.721090087890625000e+03 1.789695858955383301e+00 3.000000000000000000e+00 5.786427001953125000e+02 -1.052500000000000000e+02 5.775000000000000000e+01
3.100000000000000000e+01 4.881538461538461320e+02 3.018468627929687500e+02 -4.853698730468750000e+00 3.281227946281433105e-01 2.941176593303680420e-01 1.700957763671875000e+03 1.778569221496582031e+00 3.000000000000000000e+00 4.950986633300781250e+02 -1.047500000000000000e+02 5.775000000000000000e+01
3.600000000000000000e+01 5.059461538461538339e+02 3.105176086425781250e+02 -5.002777099609375000e+00 3.418975770473480225e-01 5.882353186607360840e-01 1.684555175781250000e+03 1.766097187995910645e+00 3.000000000000000000e+00 4.580931091308593750e+02 -1.042500000000000000e+02 5.775000000000000000e+01
2.500000000000000000e+01 5.183846153846152447e+02 3.210273437500000000e+02 -5.151885986328125000e+00 3.203043043613433838e-01 9.411764740943908691e-01 1.668152587890625000e+03 1.755675077438354492e+00 3.000000000000000000e+00 4.121267395019531250e+02 -1.037500000000000000e+02 5.775000000000000000e+01
4.200000000000000000e+01 4.835153846153846757e+02 3.343789978027343750e+02 -5.462097167968750000e+00 3.631293475627899170e-01 1.117647051811218262e+00 1.634269042968750000e+03 1.748024940490722656e+00 3.000000000000000000e+00 3.572171630859375000e+02 -1.027500000000000000e+02 5.775000000000000000e+01
3.000000000000000000e+01 4.535538461538460524e+02 3.009506530761718750e+02 -6.238983154296875000e+00 5.872668027877807617e-01 5.294117927551269531e-01 1.559280639648437500e+03 1.453210949897766113e+00 3.000000000000000000e+00 3.872427978515625000e+02 -1.002500000000000000e+02 5.775000000000000000e+01
2.100000000000000000e+01 6.425615384615383618e+02 2.867566223144531250e+02 -2.558898925781250000e-01 0.000000000000000000e+00 0.000000000000000000e+00 1.377186279296875000e+03 1.410113811492919922e+00 3.000000000000000000e+00 7.189234924316406250e+01 -1.567500000000000000e+02 5.825000000000000000e+01
1.700000000000000000e+01 6.959538461538463707e+02 3.036594238281250000e+02 -3.792724609375000000e-01 0.000000000000000000e+00 0.000000000000000000e+00 1.294947021484375000e+03 1.356590032577514648e+00 1.000000000000000000e+00 1.500119628906250000e+02 -1.562500000000000000e+02 5.825000000000000000e+01
1.600000000000000000e+01 7.614846153846158359e+02 3.291861267089843750e+02 -5.026550292968750000e-01 0.000000000000000000e+00 0.000000000000000000e+00 1.212707763671875000e+03 1.234374642372131348e+00 1.000000000000000000e+00 3.695742187500000000e+02 -1.557500000000000000e+02 5.825000000000000000e+01
0.000000000000000000e+00 8.185076923076919684e+02 4.041735229492187500e+02 -6.872558593750000000e-02 9.999999776482582092e-03 0.000000000000000000e+00 1.285666259765625000e+03 1.308036327362060547e+00 1.000000000000000000e+00 6.833048706054687500e+02 -1.552500000000000000e+02 5.825000000000000000e+01
1.000000000000000000e+00 8.198846153846154721e+02 6.713184814453125000e+02 -3.060455322265625000e+00 1.013775914907455444e-01 0.000000000000000000e+00 5.906886596679687500e+02 1.235301613807678223e+00 1.000000000000000000e+00 1.056302856445312500e+03 -1.327500000000000000e+02 5.825000000000000000e+01
3.000000000000000000e+00 7.293769230769232763e+02 6.583901367187500000e+02 -3.399566650390625000e+00 5.780478715896606445e-01 0.000000000000000000e+00 6.724946899414062500e+02 8.803886175155639648e-01 1.000000000000000000e+00 1.489282714843750000e+03 -1.322500000000000000e+02 5.825000000000000000e+01
3.400000000000000000e+01 6.478307692307694197e+02 5.989210815429687500e+02 -3.738677978515625000e+00 9.999999776482582092e-03 1.058823585510253906e+00 7.543007202148437500e+02 7.893749475479125977e-01 3.000000000000000000e+00 8.728498535156250000e+02 -1.317500000000000000e+02 5.825000000000000000e+01
3.300000000000000000e+01 5.642615384615385210e+02 5.081518859863281250e+02 -4.077819824218750000e+00 2.207370400428771973e-01 0.000000000000000000e+00 8.361066894531250000e+02 8.144469857215881348e-01 3.000000000000000000e+00 1.308355346679687500e+03 -1.312500000000000000e+02 5.825000000000000000e+01
6.600000000000000000e+01 4.815846153846154607e+02 4.291376953125000000e+02 -4.707122802734375000e+00 9.999999776482582092e-03 0.000000000000000000e+00 8.136104125976562500e+02 6.495841741561889648e-01 4.000000000000000000e+00 6.390578613281250000e+02 -1.307500000000000000e+02 5.825000000000000000e+01
6.000000000000000000e+00 4.483153846153846871e+02 3.859625549316406250e+02 -5.336425781250000000e+00 2.891382575035095215e-01 2.352941185235977173e-01 7.911141357421875000e+02 6.332373023033142090e-01 1.000000000000000000e+00 1.399589965820312500e+03 -1.302500000000000000e+02 5.825000000000000000e+01
3.700000000000000000e+01 4.587769230769232536e+02 3.501520996093750000e+02 -5.965728759765625000e+00 6.516054272651672363e-01 0.000000000000000000e+00 7.686177978515625000e+02 5.819591283798217773e-01 3.000000000000000000e+00 1.489490478515625000e+03 -1.297500000000000000e+02 5.825000000000000000e+01
4.100000000000000000e+01 4.561230769230766668e+02 2.942504882812500000e+02 -6.501953125000000000e+00 2.135502547025680542e-01 0.000000000000000000e+00 7.451431884765625000e+02 5.701481699943542480e-01 3.000000000000000000e+00 1.409140869140625000e+03 -1.292500000000000000e+02 5.825000000000000000e+01
1.200000000000000000e+01 4.459461538461539476e+02 2.639035644531250000e+02 -6.758972167968750000e+00 6.829901337623596191e-01 5.882353186607360840e-01 7.187336425781250000e+02 8.746540546417236328e-01 1.000000000000000000e+00 1.551145141601562500e+03 -1.287500000000000000e+02 5.825000000000000000e+01
6.000000000000000000e+00 4.308846153846153584e+02 2.532980499267578125e+02 -7.015991210937500000e+00 4.696177542209625244e-01 0.000000000000000000e+00 6.923240966796875000e+02 5.652295351028442383e-01 1.000000000000000000e+00 1.558250732421875000e+03 -1.282500000000000000e+02 5.825000000000000000e+01
4.200000000000000000e+01 4.256307692307693742e+02 2.387220306396484375e+02 -7.273010253906250000e+00 3.632315099239349365e-01 0.000000000000000000e+00 6.659145507812500000e+02 1.051909089088439941e+00 3.000000000000000000e+00 1.469066406250000000e+03 -1.277500000000000000e+02 5.825000000000000000e+01
5.300000000000000000e+01 4.238153846153844597e+02 2.224646911621093750e+02 -7.311889648437500000e+00 1.123957186937332153e-01 0.000000000000000000e+00 6.679744873046875000e+02 6.652055978775024414e-01 4.000000000000000000e+00 1.522349365234375000e+03 -1.272500000000000000e+02 5.825000000000000000e+01
1.100000000000000000e+01 4.322846153846155062e+02 2.143173980712890625e+02 -7.132629394531250000e+00 6.127375960350036621e-01 0.000000000000000000e+00 6.985039062500000000e+02 6.199421882629394531e-01 1.000000000000000000e+00 1.519599243164062500e+03 -1.267500000000000000e+02 5.825000000000000000e+01
7.000000000000000000e+00 4.532923076923076451e+02 2.143501434326171875e+02 -6.953399658203125000e+00 5.148442983627319336e-01 6.470588445663452148e-01 7.290333251953125000e+02 5.650657415390014648e-01 1.000000000000000000e+00 1.715782592773437500e+03 -1.262500000000000000e+02 5.825000000000000000e+01
3.000000000000000000e+01 4.821461538461540499e+02 2.228186340332031250e+02 -6.774139404296875000e+00 4.763070642948150635e-01 2.941176593303680420e-01 7.595628051757812500e+02 9.601743817329406738e-01 3.000000000000000000e+00 1.673469726562500000e+03 -1.257500000000000000e+02 5.825000000000000000e+01
2.100000000000000000e+01 5.497307692307690559e+02 2.465631103515625000e+02 -4.872100830078125000e+00 9.999999776482582092e-03 0.000000000000000000e+00 1.191261962890625000e+03 1.344340562820434570e+00 3.000000000000000000e+00 1.026642822265625000e+03 -1.242500000000000000e+02 5.825000000000000000e+01
7.000000000000000000e+01 5.204769230769230717e+02 2.466602020263671875e+02 -4.196746826171875000e+00 1.079675927758216858e-01 2.941176593303680420e-01 1.345468139648437500e+03 9.144269824028015137e-01 4.000000000000000000e+00 8.772073974609375000e+02 -1.237500000000000000e+02 5.825000000000000000e+01
7.100000000000000000e+01 4.986999999999998181e+02 2.417642517089843750e+02 -3.763519287109375000e+00 1.465106755495071411e-01 0.000000000000000000e+00 1.438814697265625000e+03 8.119227886199951172e-01 4.000000000000000000e+00 9.043882446289062500e+02 -1.232500000000000000e+02 5.825000000000000000e+01
6.800000000000000000e+01 4.720615384615384187e+02 2.372113037109375000e+02 -3.330291748046875000e+00 0.000000000000000000e+00 0.000000000000000000e+00 1.532161254882812500e+03 7.778859138488769531e-01 4.000000000000000000e+00 5.451927490234375000e+02 -1.227500000000000000e+02 5.825000000000000000e+01
4.000000000000000000e+01 4.592615384615385210e+02 2.332016448974609375e+02 -2.897064208984375000e+00 9.999999776482582092e-03 0.000000000000000000e+00 1.625507812500000000e+03 7.936638593673706055e-01 3.000000000000000000e+00 5.522605590820312500e+02 -1.222500000000000000e+02 5.825000000000000000e+01
6.400000000000000000e+01 4.401692307692310351e+02 2.309798431396484375e+02 -2.520996093750000000e+00 0.000000000000000000e+00 5.882352963089942932e-02 1.712680541992187500e+03 7.999462485313415527e-01 4.000000000000000000e+00 4.006158752441406250e+02 -1.217500000000000000e+02 5.825000000000000000e+01
6.100000000000000000e+01 4.307692307692307168e+02 2.308440093994140625e+02 -2.316375732421875000e+00 0.000000000000000000e+00 0.000000000000000000e+00 1.781331420898437500e+03 8.022971153259277344e-01 4.000000000000000000e+00 4.431065368652343750e+02 -1.212500000000000000e+02 5.825000000000000000e+01
3.000000000000000000e+01 4.274846153846150969e+02 2.330201263427734375e+02 -2.111724853515625000e+00 0.000000000000000000e+00 0.000000000000000000e+00 1.849982421875000000e+03 7.950478196144104004e-01 3.000000000000000000e+00 4.436190185546875000e+02 -1.207500000000000000e+02 5.825000000000000000e+01
3.500000000000000000e+01 4.227384615384617064e+02 2.320932006835937500e+02 -1.907073974609375000e+00 9.999999776482582092e-03 6.470588445663452148e-01 1.918633422851562500e+03 7.826263308525085449e-01 3.000000000000000000e+00 4.870462951660156250e+02 -1.202500000000000000e+02 5.825000000000000000e+01
3.900000000000000000e+01 4.229615384615387370e+02 2.301151885986328125e+02 -1.815490722656250000e+00 9.999999776482582092e-03 0.000000000000000000e+00 1.970269409179687500e+03 7.706828713417053223e-01 3.000000000000000000e+00 5.420344848632812500e+02 -1.197500000000000000e+02 5.825000000000000000e+01
7.000000000000000000e+01 4.275615384615385324e+02 2.213678436279296875e+02 -1.836944580078125000e+00 9.999999776482582092e-03 0.000000000000000000e+00 2.004890625000000000e+03 7.638816237449645996e-01 4.000000000000000000e+00 5.640717773437500000e+02 -1.192500000000000000e+02 5.825000000000000000e+01
5.400000000000000000e+01 4.243461538461537543e+02 2.139420318603515625e+02 -1.858398437500000000e+00 9.999999776482582092e-03 0.000000000000000000e+00 2.039511718750000000e+03 7.677370905876159668e-01 4.000000000000000000e+00 5.275145263671875000e+02 -1.187500000000000000e+02 5.825000000000000000e+01
7.300000000000000000e+01 4.223384615384615017e+02 2.086708831787109375e+02 -1.879852294921875000e+00 9.999999776482582092e-03 0.000000000000000000e+00 2.074132812500000000e+03 7.743366360664367676e-01 4.000000000000000000e+00 5.375090332031250000e+02 -1.182500000000000000e+02 5.825000000000000000e+01
4.000000000000000000e+01 4.151769230769231172e+02 2.019382629394531250e+02 -1.960845947265625000e+00 9.999999776482582092e-03 2.352941185235977173e-01 2.088341064453125000e+03 7.849051952362060547e-01 3.000000000000000000e+00 3.739469299316406250e+02 -1.177500000000000000e+02 5.825000000000000000e+01
4.400000000000000000e+01 4.012230769230770306e+02 1.953795166015625000e+02 -2.061645507812500000e+00 9.999999776482582092e-03 2.352941185235977173e-01 2.095744628906250000e+03 7.982833981513977051e-01 3.000000000000000000e+00 3.323123779296875000e+02 -1.172500000000000000e+02 5.825000000000000000e+01
4.700000000000000000e+01 3.871769230769232308e+02 1.932219085693359375e+02 -2.162445068359375000e+00 9.999999776482582092e-03 5.882352963089942932e-02 2.103148437500000000e+03 8.137629032135009766e-01 4.000000000000000000e+00 3.181690063476562500e+02 -1.167500000000000000e+02 5.825000000000000000e+01
6.100000000000000000e+01 3.769692307692304212e+02 1.959255523681640625e+02 -2.346862792968750000e+00 0.000000000000000000e+00 3.529411852359771729e-01 2.105877197265625000e+03 8.178757429122924805e-01 4.000000000000000000e+00 2.688203430175781250e+02 -1.157500000000000000e+02 5.825000000000000000e+01
3.400000000000000000e+01 3.752153846153845507e+02 1.944000854492187500e+02 -2.430480957031250000e+00 0.000000000000000000e+00 3.529411852359771729e-01 2.101202148437500000e+03 8.117823004722595215e-01 3.000000000000000000e+00 2.703141174316406250e+02 -1.152500000000000000e+02 5.825000000000000000e+01
5.100000000000000000e+01 3.761769230769232308e+02 1.942090454101562500e+02 -2.514099121093750000e+00 9.999999776482582092e-03 2.352941185235977173e-01 2.096527343750000000e+03 8.115171194076538086e-01 4.000000000000000000e+00 2.849963378906250000e+02 -1.147500000000000000e+02 5.825000000000000000e+01
4.900000000000000000e+01 3.703230769230769965e+02 1.881341857910156250e+02 -2.603851318359375000e+00 9.999999776482582092e-03 8.235294222831726074e-01 2.088632324218750000e+03 8.102934956550598145e-01 4.000000000000000000e+00 2.674658508300781250e+02 -1.142500000000000000e+02 5.825000000000000000e+01
4.600000000000000000e+01 3.747076923076923549e+02 1.808583679199218750e+02 -2.711975097656250000e+00 9.999999776482582092e-03 5.882353186607360840e-01 2.071078369140625000e+03 8.052722811698913574e-01 4.000000000000000000e+00 2.417357482910156250e+02 -1.137500000000000000e+02 5.825000000000000000e+01
5.900000000000000000e+01 3.768538461538464048e+02 1.787155456542968750e+02 -2.820098876953125000e+00 9.999999776482582092e-03 1.176470592617988586e-01 2.053524169921875000e+03 7.955778837203979492e-01 4.000000000000000000e+00 2.607147521972656250e+02 -1.132500000000000000e+02 5.825000000000000000e+01
4.500000000000000000e+01 3.829076923076924004e+02 1.813922271728515625e+02 -2.928222656250000000e+00 9.999999776482582092e-03 2.352941185235977173e-01 2.035969848632812500e+03 7.848302721977233887e-01 4.000000000000000000e+00 2.825210266113281250e+02 -1.127500000000000000e+02 5.825000000000000000e+01
4.000000000000000000e+01 3.799692307692306485e+02 1.871651611328125000e+02 -3.093322753906250000e+00 9.999999776482582092e-03 2.941176593303680420e-01 1.999167480468750000e+03 8.836737871170043945e-01 3.000000000000000000e+00 2.126194000244140625e+02 -1.117500000000000000e+02 5.825000000000000000e+01
8.000000000000000000e+00 3.838384615384615586e+02 1.870737457275390625e+02 -3.167327880859375000e+00 9.999999776482582092e-03 1.000000000000000000e+00 1.980484008789062500e+03 1.785886645317077637e+00 1.000000000000000000e+00 2.494145355224609375e+02 -1.112500000000000000e+02 5.825000000000000000e+01
2.600000000000000000e+01 3.849769230769231285e+02 1.868345642089843750e+02 -3.241363525390625000e+00 9.999999776482582092e-03 8.823529481887817383e-01 1.961800537109375000e+03 1.964111089706420898e+00 3.000000000000000000e+00 2.889446411132812500e+02 -1.107500000000000000e+02 5.825000000000000000e+01
5.000000000000000000e+01 4.007230769230769170e+02 1.918876953125000000e+02 -3.489044189453125000e+00 1.339871734380722046e-01 5.882353186607360840e-01 1.908430419921875000e+03 1.921383857727050781e+00 4.000000000000000000e+00 3.346384277343750000e+02 -1.097500000000000000e+02 5.825000000000000000e+01
2.600000000000000000e+01 4.013999999999999204e+02 2.015235290527343750e+02 -3.619995117187500000e+00 1.711897104978561401e-01 9.411764740943908691e-01 1.880602294921875000e+03 1.886167764663696289e+00 3.000000000000000000e+00 4.475781860351562500e+02 -1.092500000000000000e+02 5.825000000000000000e+01
2.600000000000000000e+01 4.088230769230769965e+02 2.158459167480468750e+02 -3.750946044921875000e+00 2.052894979715347290e-01 1.176470637321472168e+00 1.852774169921875000e+03 1.853970289230346680e+00 3.000000000000000000e+00 4.630595092773437500e+02 -1.087500000000000000e+02 5.825000000000000000e+01
2.700000000000000000e+01 4.160153846153845052e+02 2.395843353271484375e+02 -3.929351806640625000e+00 2.414403259754180908e-01 1.470588207244873047e+00 1.823611450195312500e+03 1.829946994781494141e+00 3.000000000000000000e+00 4.849678649902343750e+02 -1.082500000000000000e+02 5.825000000000000000e+01
2.600000000000000000e+01 4.207615384615384073e+02 2.722099304199218750e+02 -4.107757568359375000e+00 2.589192986488342285e-01 8.235294222831726074e-01 1.794448730468750000e+03 1.810299158096313477e+00 3.000000000000000000e+00 4.730669860839843750e+02 -1.077500000000000000e+02 5.825000000000000000e+01
2.200000000000000000e+01 4.289538461538461434e+02 2.852927856445312500e+02 -4.286163330078125000e+00 3.277138173580169678e-01 8.235294222831726074e-01 1.765286010742187500e+03 1.797295093536376953e+00 3.000000000000000000e+00 5.239920043945312500e+02 -1.072500000000000000e+02 5.825000000000000000e+01
4.400000000000000000e+01 4.218846153846153584e+02 2.855356750488281250e+02 -4.465423583984375000e+00 3.038172721862792969e-01 1.058823585510253906e+00 1.736766113281250000e+03 1.807134985923767090e+00 3.000000000000000000e+00 5.058576965332031250e+02 -1.067500000000000000e+02 5.825000000000000000e+01
3.500000000000000000e+01 4.252230769230769738e+02 2.830647888183593750e+02 -4.647338867187500000e+00 2.426997572183609009e-01 9.411764740943908691e-01 1.710175048828125000e+03 1.813366651535034180e+00 3.000000000000000000e+00 3.682754211425781250e+02 -1.062500000000000000e+02 5.825000000000000000e+01
4.200000000000000000e+01 4.333153846153846303e+02 2.812583618164062500e+02 -4.829254150390625000e+00 2.909487187862396240e-01 5.882353186607360840e-01 1.683583984375000000e+03 1.802895069122314453e+00 3.000000000000000000e+00 3.825940551757812500e+02 -1.057500000000000000e+02 5.825000000000000000e+01
2.900000000000000000e+01 4.552923076923076451e+02 2.872917480468750000e+02 -5.011169433593750000e+00 3.398587107658386230e-01 5.882353186607360840e-01 1.656992919921875000e+03 1.780368804931640625e+00 3.000000000000000000e+00 4.521507263183593750e+02 -1.052500000000000000e+02 5.825000000000000000e+01
3.300000000000000000e+01 4.730538461538462229e+02 2.968239135742187500e+02 -5.194335937500000000e+00 3.770907521247863770e-01 7.647058963775634766e-01 1.633955810546875000e+03 1.756484031677246094e+00 3.000000000000000000e+00 4.461995544433593750e+02 -1.047500000000000000e+02 5.825000000000000000e+01
2.900000000000000000e+01 4.928692307692307963e+02 3.093068542480468750e+02 -5.378753662109375000e+00 4.320435523986816406e-01 2.941176593303680420e-01 1.614472778320312500e+03 1.739588022232055664e+00 3.000000000000000000e+00 4.836087341308593750e+02 -1.042500000000000000e+02 5.825000000000000000e+01
3.800000000000000000e+01 4.367769230769230262e+02 3.334732360839843750e+02 -6.314575195312500000e+00 5.791662335395812988e-01 0.000000000000000000e+00 1.515548217773437500e+03 1.685005307197570801e+00 3.000000000000000000e+00 3.609707031250000000e+02 -1.017500000000000000e+02 5.825000000000000000e+01
3.000000000000000000e+01 4.300384615384615472e+02 3.229053955078125000e+02 -6.503967285156250000e+00 5.887231826782226562e-01 3.529411852359771729e-01 1.495516357421875000e+03 1.675298810005187988e+00 3.000000000000000000e+00 3.646385192871093750e+02 -1.012500000000000000e+02 5.825000000000000000e+01
2.400000000000000000e+01 4.360999999999999659e+02 3.083139343261718750e+02 -6.774536132812500000e+00 6.840905547142028809e-01 0.000000000000000000e+00 1.473927124023437500e+03 1.400400519371032715e+00 3.000000000000000000e+00 4.086869506835937500e+02 -1.002500000000000000e+02 5.825000000000000000e+01
1.400000000000000000e+01 5.545846153846156312e+02 2.949879455566406250e+02 -1.163696289062500000e+00 0.000000000000000000e+00 0.000000000000000000e+00 1.351076782226562500e+03 1.406412124633789062e+00 1.000000000000000000e+00 2.835841369628906250e+01 -1.567500000000000000e+02 5.875000000000000000e+01
1.600000000000000000e+01 6.155615384615383618e+02 3.083537597656250000e+02 -1.245758056640625000e+00 0.000000000000000000e+00 0.000000000000000000e+00 1.284845703125000000e+03 1.380150914192199707e+00 1.000000000000000000e+00 6.028699493408203125e+01 -1.562500000000000000e+02 5.875000000000000000e+01
5.500000000000000000e+01 6.914153846153841414e+02 3.289900817871093750e+02 -1.327819824218750000e+00 0.000000000000000000e+00 0.000000000000000000e+00 1.218614624023437500e+03 1.332372665405273438e+00 4.000000000000000000e+00 2.200412292480468750e+02 -1.557500000000000000e+02 5.875000000000000000e+01
1.000000000000000000e+00 8.220538461538463935e+02 4.623785400390625000e+02 -5.185241699218750000e-01 1.162906810641288757e-01 0.000000000000000000e+00 1.319087768554687500e+03 1.249743819236755371e+00 1.000000000000000000e+00 8.843853149414062500e+02 -1.547500000000000000e+02 5.875000000000000000e+01
9.000000000000000000e+00 8.938769230769224805e+02 5.563351440429687500e+02 -4.434204101562500000e-02 9.999999776482582092e-03 0.000000000000000000e+00 1.385962646484375000e+03 1.256611108779907227e+00 1.000000000000000000e+00 5.533591308593750000e+02 -1.542500000000000000e+02 5.875000000000000000e+01
3.400000000000000000e+01 7.169461538461538339e+02 6.567028808593750000e+02 -3.198699951171875000e+00 1.230447441339492798e-01 0.000000000000000000e+00 6.678005981445312500e+02 1.221224904060363770e+00 3.000000000000000000e+00 1.130247802734375000e+03 -1.332500000000000000e+02 5.875000000000000000e+01
2.600000000000000000e+01 6.508846153846153584e+02 6.573059692382812500e+02 -3.673065185546875000e+00 9.999999776482582092e-03 2.941176593303680420e-01 6.687486572265625000e+02 6.568356156349182129e-01 3.000000000000000000e+00 4.532764892578125000e+02 -1.327500000000000000e+02 5.875000000000000000e+01
3.300000000000000000e+01 5.868769230769231626e+02 6.422792968750000000e+02 -4.058258056640625000e+00 0.000000000000000000e+00 0.000000000000000000e+00 7.166347045898437500e+02 6.477363109588623047e-01 3.000000000000000000e+00 7.253424682617187500e+02 -1.322500000000000000e+02 5.875000000000000000e+01
3.900000000000000000e+01 5.331153846153845279e+02 5.650626831054687500e+02 -4.443450927734375000e+00 1.029197052121162415e-01 3.529411852359771729e-01 7.645208129882812500e+02 6.292614340782165527e-01 3.000000000000000000e+00 9.947812500000000000e+02 -1.317500000000000000e+02 5.875000000000000000e+01
4.700000000000000000e+01 4.888846153846153015e+02 4.541648864746093750e+02 -4.828613281250000000e+00 1.579161584377288818e-01 0.000000000000000000e+00 8.124069213867187500e+02 6.061234474182128906e-01 4.000000000000000000e+00 9.782969360351562500e+02 -1.312500000000000000e+02 5.875000000000000000e+01
9.000000000000000000e+00 4.756384615384614563e+02 2.423702392578125000e+02 -6.665618896484375000e+00 6.113899350166320801e-01 0.000000000000000000e+00 7.781264038085937500e+02 1.120804667472839355e+00 1.000000000000000000e+00 1.495916992187500000e+03 -1.292500000000000000e+02 5.875000000000000000e+01
1.000000000000000000e+00 4.504153846153847098e+02 2.293562622070312500e+02 -6.823730468750000000e+00 7.296712398529052734e-01 0.000000000000000000e+00 7.669722900390625000e+02 9.581543803215026855e-01 1.000000000000000000e+00 1.663129638671875000e+03 -1.287500000000000000e+02 5.875000000000000000e+01
1.100000000000000000e+01 4.290461538461537430e+02 2.165439605712890625e+02 -6.981842041015625000e+00 7.065474390983581543e-01 2.941176593303680420e-01 7.558181762695312500e+02 5.845831036567687988e-01 1.000000000000000000e+00 1.498361938476562500e+03 -1.282500000000000000e+02 5.875000000000000000e+01
5.700000000000000000e+01 4.242153846153844938e+02 2.031742553710937500e+02 -7.139984130859375000e+00 2.834667861461639404e-01 9.411764740943908691e-01 7.446640625000000000e+02 6.097804903984069824e-01 4.000000000000000000e+00 1.157246704101562500e+03 -1.277500000000000000e+02 5.875000000000000000e+01
2.000000000000000000e+00 4.643692307692311374e+02 2.094931335449218750e+02 -6.641143798828125000e+00 6.058967113494873047e-01 0.000000000000000000e+00 8.345514526367187500e+02 7.636117935180664062e-01 1.000000000000000000e+00 1.821093750000000000e+03 -1.262500000000000000e+02 5.875000000000000000e+01
6.300000000000000000e+01 5.228000000000002956e+02 2.268004913330078125e+02 -5.905364990234375000e+00 1.391110271215438843e-01 0.000000000000000000e+00 9.844677124023437500e+02 6.100638508796691895e-01 4.000000000000000000e+00 1.399731079101562500e+03 -1.252500000000000000e+02 5.875000000000000000e+01
4.000000000000000000e+00 5.610230769230770420e+02 2.315497436523437500e+02 -5.309600830078125000e+00 3.595970869064331055e-01 0.000000000000000000e+00 1.120713134765625000e+03 6.415659189224243164e-01 1.000000000000000000e+00 1.590552001953125000e+03 -1.247500000000000000e+02 5.875000000000000000e+01
5.300000000000000000e+01 5.342923076923075314e+02 2.318565216064453125e+02 -4.713806152343750000e+00 9.999999776482582092e-03 0.000000000000000000e+00 1.256958496093750000e+03 6.903602480888366699e-01 4.000000000000000000e+00 7.037526245117187500e+02 -1.242500000000000000e+02 5.875000000000000000e+01
5.300000000000000000e+01 4.994692307692308191e+02 2.303717193603515625e+02 -4.118011474609375000e+00 0.000000000000000000e+00 0.000000000000000000e+00 1.393203857421875000e+03 7.495966553688049316e-01 4.000000000000000000e+00 5.272769165039062500e+02 -1.237500000000000000e+02 5.875000000000000000e+01
5.400000000000000000e+01 4.771230769230768942e+02 2.316675720214843750e+02 -3.736694335937500000e+00 0.000000000000000000e+00 5.294117927551269531e-01 1.481520751953125000e+03 7.830346822738647461e-01 4.000000000000000000e+00 4.430471801757812500e+02 -1.232500000000000000e+02 5.875000000000000000e+01
5.500000000000000000e+01 4.499153846153846530e+02 2.315417938232421875e+02 -3.355377197265625000e+00 9.999999776482582092e-03 5.882352963089942932e-02 1.569837524414062500e+03 8.057860136032104492e-01 4.000000000000000000e+00 3.673180847167968750e+02 -1.227500000000000000e+02 5.875000000000000000e+01
5.600000000000000000e+01 4.342615384615386347e+02 2.309400482177734375e+02 -2.974060058593750000e+00 9.999999776482582092e-03 0.000000000000000000e+00 1.658154418945312500e+03 8.104405999183654785e-01 4.000000000000000000e+00 3.888390502929687500e+02 -1.222500000000000000e+02 5.875000000000000000e+01
4.400000000000000000e+01 4.290000000000000000e+02 2.298511199951171875e+02 -2.649017333984375000e+00 9.999999776482582092e-03 0.000000000000000000e+00 1.739970947265625000e+03 7.996915578842163086e-01 3.000000000000000000e+00 4.927422790527343750e+02 -1.217500000000000000e+02 5.875000000000000000e+01
5.700000000000000000e+01 4.214615384615385096e+02 2.296247711181640625e+02 -2.492767333984375000e+00 9.999999776482582092e-03 0.000000000000000000e+00 1.802286621093750000e+03 7.905312180519104004e-01 4.000000000000000000e+00 5.070513610839843750e+02 -1.212500000000000000e+02 5.875000000000000000e+01
6.200000000000000000e+01 4.183846153846157563e+02 2.300007476806640625e+02 -2.336547851562500000e+00 9.999999776482582092e-03 0.000000000000000000e+00 1.864602294921875000e+03 7.849220633506774902e-01 4.000000000000000000e+00 4.129908752441406250e+02 -1.207500000000000000e+02 5.875000000000000000e+01
4.600000000000000000e+01 4.140769230769229239e+02 2.277980957031250000e+02 -2.180328369140625000e+00 9.999999776482582092e-03 5.882352963089942932e-02 1.926917968750000000e+03 7.873484492301940918e-01 4.000000000000000000e+00 3.525266723632812500e+02 -1.202500000000000000e+02 5.875000000000000000e+01
3.300000000000000000e+01 4.125846153846151765e+02 2.223017883300781250e+02 -2.128234863281250000e+00 0.000000000000000000e+00 2.352941185235977173e-01 1.972115966796875000e+03 7.885382175445556641e-01 3.000000000000000000e+00 3.475440979003906250e+02 -1.197500000000000000e+02 5.875000000000000000e+01
3.700000000000000000e+01 4.147076923076920707e+02 2.176736755371093750e+02 -2.180236816406250000e+00 0.000000000000000000e+00 2.352941185235977173e-01 2.000196044921875000e+03 7.842153906822204590e-01 3.000000000000000000e+00 3.281127014160156250e+02 -1.192500000000000000e+02 5.875000000000000000e+01
4.000000000000000000e+01 4.020461538461540272e+02 2.110450134277343750e+02 -2.284271240234375000e+00 9.999999776482582092e-03 5.294117927551269531e-01 2.056356445312500000e+03 7.784197926521301270e-01 3.000000000000000000e+00 3.522243041992187500e+02 -1.182500000000000000e+02 5.875000000000000000e+01
4.800000000000000000e+01 4.012230769230769170e+02 2.023582458496093750e+02 -2.376586914062500000e+00 9.999999776482582092e-03 2.941176593303680420e-01 2.066883300781250000e+03 7.758083939552307129e-01 4.000000000000000000e+00 3.846161804199218750e+02 -1.177500000000000000e+02 5.875000000000000000e+01
4.600000000000000000e+01 3.950538461538462229e+02 1.926926879882812500e+02 -2.482360839843750000e+00 9.999999776482582092e-03 0.000000000000000000e+00 2.071559326171875000e+03 7.759904265403747559e-01 4.000000000000000000e+00 3.529247436523437500e+02 -1.172500000000000000e+02 5.875000000000000000e+01
6.500000000000000000e+01 3.829538461538461434e+02 1.918682708740234375e+02 -2.588134765625000000e+00 9.999999776482582092e-03 0.000000000000000000e+00 2.076235351562500000e+03 7.761378884315490723e-01 4.000000000000000000e+00 4.277127685546875000e+02 -1.167500000000000000e+02 5.875000000000000000e+01
7.000000000000000000e+01 3.828923076923078384e+02 1.910076293945312500e+02 -2.693908691406250000e+00 1.122093200683593750e-01 2.941176593303680420e-01 2.080911132812500000e+03 8.621255755424499512e-01 4.000000000000000000e+00 4.694892578125000000e+02 -1.162500000000000000e+02 5.875000000000000000e+01
3.000000000000000000e+01 3.927769230769231967e+02 1.857354125976562500e+02 -2.866638183593750000e+00 2.692681550979614258e-01 0.000000000000000000e+00 2.063563720703125000e+03 1.430285096168518066e+00 3.000000000000000000e+00 8.010358886718750000e+02 -1.152500000000000000e+02 5.875000000000000000e+01
5.700000000000000000e+01 3.878692307692306258e+02 1.821224822998046875e+02 -2.953033447265625000e+00 2.309737056493759155e-01 0.000000000000000000e+00 2.054890136718750000e+03 1.453921198844909668e+00 4.000000000000000000e+00 6.751418457031250000e+02 -1.147500000000000000e+02 5.875000000000000000e+01
6.700000000000000000e+01 3.710692307692308987e+02 1.751140747070312500e+02 -3.040161132812500000e+00 9.999999776482582092e-03 6.470588445663452148e-01 2.044022094726562500e+03 9.497783780097961426e-01 4.000000000000000000e+00 3.118008422851562500e+02 -1.142500000000000000e+02 5.875000000000000000e+01
5.300000000000000000e+01 3.617230769230772012e+02 1.693219299316406250e+02 -3.129638671875000000e+00 9.999999776482582092e-03 8.823529481887817383e-01 2.026571533203125000e+03 7.895585298538208008e-01 4.000000000000000000e+00 2.413352661132812500e+02 -1.137500000000000000e+02 5.875000000000000000e+01
5.400000000000000000e+01 3.608384615384615017e+02 1.668519287109375000e+02 -3.219116210937500000e+00 9.999999776482582092e-03 8.235294222831726074e-01 2.009121093750000000e+03 7.930332422256469727e-01 4.000000000000000000e+00 2.306037902832031250e+02 -1.132500000000000000e+02 5.875000000000000000e+01
1.700000000000000000e+01 3.776153846153846416e+02 1.755476837158203125e+02 -3.776763916015625000e+00 1.482727825641632080e-01 0.000000000000000000e+00 1.857381469726562500e+03 1.921410560607910156e+00 1.000000000000000000e+00 2.792590332031250000e+02 -1.097500000000000000e+02 5.875000000000000000e+01
2.500000000000000000e+01 3.839307692307692719e+02 1.802861175537109375e+02 -3.897369384765625000e+00 1.732132881879806519e-01 5.882353186607360840e-01 1.828886596679687500e+03 1.893415093421936035e+00 3.000000000000000000e+00 3.120689086914062500e+02 -1.092500000000000000e+02 5.875000000000000000e+01
3.100000000000000000e+01 4.005076923076922526e+02 2.300062103271484375e+02 -4.392822265625000000e+00 3.341455459594726562e-01 8.823529481887817383e-01 1.736662597656250000e+03 1.804963350296020508e+00 3.000000000000000000e+00 4.409173889160156250e+02 -1.077500000000000000e+02 5.875000000000000000e+01
3.000000000000000000e+01 4.090692307692307850e+02 2.437482757568359375e+02 -4.580230712890625000e+00 3.502398133277893066e-01 1.000000000000000000e+00 1.704798095703125000e+03 1.785682439804077148e+00 3.000000000000000000e+00 4.435332641601562500e+02 -1.072500000000000000e+02 5.875000000000000000e+01
3.200000000000000000e+01 4.104461538461538339e+02 2.489125213623046875e+02 -4.773071289062500000e+00 3.429721891880035400e-01 7.058823704719543457e-01 1.673734130859375000e+03 1.777059197425842285e+00 3.000000000000000000e+00 4.182236022949218750e+02 -1.067500000000000000e+02 5.875000000000000000e+01
2.400000000000000000e+01 4.109846153846154948e+02 2.507818298339843750e+02 -4.982208251953125000e+00 3.622733652591705322e-01 9.411764740943908691e-01 1.645072265625000000e+03 1.786794662475585938e+00 3.000000000000000000e+00 4.010167236328125000e+02 -1.062500000000000000e+02 5.875000000000000000e+01
2.200000000000000000e+01 4.074615384615384528e+02 2.536110229492187500e+02 -5.191314697265625000e+00 3.133870661258697510e-01 1.058823585510253906e+00 1.616410400390625000e+03 1.787120103836059570e+00 3.000000000000000000e+00 2.927539978027343750e+02 -1.057500000000000000e+02 5.875000000000000000e+01
4.500000000000000000e+01 4.302615384615384073e+02 2.640152587890625000e+02 -5.400421142578125000e+00 4.077414870262145996e-01 5.882353186607360840e-01 1.587748413085937500e+03 1.736680507659912109e+00 4.000000000000000000e+00 3.893471374511718750e+02 -1.052500000000000000e+02 5.875000000000000000e+01
3.000000000000000000e+01 4.492153846153845507e+02 2.793763427734375000e+02 -5.612823486328125000e+00 4.225460290908813477e-01 1.470588207244873047e+00 1.562633911132812500e+03 1.734045147895812988e+00 3.000000000000000000e+00 3.904440002441406250e+02 -1.047500000000000000e+02 5.875000000000000000e+01
3.700000000000000000e+01 4.658692307692307963e+02 2.981140747070312500e+02 -5.828582763671875000e+00 4.534741640090942383e-01 8.235294222831726074e-01 1.541066650390625000e+03 1.711630344390869141e+00 3.000000000000000000e+00 3.933500976562500000e+02 -1.042500000000000000e+02 5.875000000000000000e+01
4.000000000000000000e+01 4.395461538461538566e+02 3.403823242187500000e+02 -6.660461425781250000e+00 6.380326151847839355e-01 5.882352963089942932e-02 1.459644775390625000e+03 1.645069122314453125e+00 3.000000000000000000e+00 4.009205932617187500e+02 -1.022500000000000000e+02 5.875000000000000000e+01
2.500000000000000000e+01 4.191153846153846416e+02 3.394075317382812500e+02 -6.858459472656250000e+00 6.523582339286804199e-01 0.000000000000000000e+00 1.440847167968750000e+03 1.638042092323303223e+00 3.000000000000000000e+00 3.710851440429687500e+02 -1.017500000000000000e+02 5.875000000000000000e+01
1.800000000000000000e+01 4.173461538461538680e+02 3.323705749511718750e+02 -7.056457519531250000e+00 7.185570001602172852e-01 3.529411852359771729e-01 1.422049682617187500e+03 1.602336168289184570e+00 1.000000000000000000e+00 3.857591247558593750e+02 -1.012500000000000000e+02 5.875000000000000000e+01
3.900000000000000000e+01 4.153999999999999773e+02 3.151876220703125000e+02 -7.297668457031250000e+00 7.607476711273193359e-01 0.000000000000000000e+00 1.400489013671875000e+03 1.581014394760131836e+00 3.000000000000000000e+00 3.592011413574218750e+02 -1.002500000000000000e+02 5.875000000000000000e+01
1.300000000000000000e+01 6.421923076923079634e+02 2.145358428955078125e+02 -3.681030273437500000e-01 0.000000000000000000e+00 0.000000000000000000e+00 1.411167236328125000e+03 1.332153439521789551e+00 1.000000000000000000e+00 1.335234375000000000e+02 -1.617500000000000000e+02 5.925000000000000000e+01
3.000000000000000000e+00 6.281769230769230035e+02 2.143544311523437500e+02 -5.900268554687500000e-01 9.999999776482582092e-03 0.000000000000000000e+00 1.424078002929687500e+03 1.319358110427856445e+00 1.000000000000000000e+00 9.803054809570312500e+01 -1.612500000000000000e+02 5.925000000000000000e+01
9.000000000000000000e+00 6.144230769230766782e+02 2.179939117431640625e+02 -8.432006835937500000e-01 9.999999776482582092e-03 0.000000000000000000e+00 1.382724731445312500e+03 1.310457110404968262e+00 1.000000000000000000e+00 2.098326416015625000e+02 -1.607500000000000000e+02 5.925000000000000000e+01
1.000000000000000000e+01 6.063999999999998636e+02 2.211834259033203125e+02 -1.096405029296875000e+00 0.000000000000000000e+00 0.000000000000000000e+00 1.341371459960937500e+03 1.303377151489257812e+00 1.000000000000000000e+00 3.004406738281250000e+01 -1.602500000000000000e+02 5.925000000000000000e+01
5.000000000000000000e+00 5.842076923076923549e+02 2.204758758544921875e+02 -1.349609375000000000e+00 9.999999776482582092e-03 0.000000000000000000e+00 1.300018188476562500e+03 1.294961571693420410e+00 1.000000000000000000e+00 4.135659484863281250e+02 -1.597500000000000000e+02 5.925000000000000000e+01
3.100000000000000000e+01 5.582769230769232536e+02 2.099872283935546875e+02 -1.696472167968750000e+00 9.999999776482582092e-03 0.000000000000000000e+00 1.312769409179687500e+03 1.317999243736267090e+00 3.000000000000000000e+00 8.944857025146484375e+01 -1.587500000000000000e+02 5.925000000000000000e+01
6.000000000000000000e+00 5.682230769230772012e+02 2.134196166992187500e+02 -1.822052001953125000e+00 0.000000000000000000e+00 0.000000000000000000e+00 1.347782348632812500e+03 1.368537068367004395e+00 1.000000000000000000e+00 1.171117095947265625e+02 -1.582500000000000000e+02 5.925000000000000000e+01
9.000000000000000000e+00 5.509384615384614108e+02 2.354235534667968750e+02 -1.947631835937500000e+00 0.000000000000000000e+00 0.000000000000000000e+00 1.382795288085937500e+03 1.396888136863708496e+00 1.000000000000000000e+00 4.943094253540039062e+01 -1.577500000000000000e+02 5.925000000000000000e+01
7.000000000000000000e+00 5.398076923076923777e+02 2.668934631347656250e+02 -2.030792236328125000e+00 0.000000000000000000e+00 0.000000000000000000e+00 1.375190185546875000e+03 1.405585289001464844e+00 1.000000000000000000e+00 5.731945800781250000e+01 -1.572500000000000000e+02 5.925000000000000000e+01
1.600000000000000000e+01 5.411846153846151992e+02 2.945973205566406250e+02 -2.071533203125000000e+00 0.000000000000000000e+00 0.000000000000000000e+00 1.324967285156250000e+03 1.414306640625000000e+00 1.000000000000000000e+00 3.071163558959960938e+01 -1.567500000000000000e+02 5.925000000000000000e+01
1.000000000000000000e+01 5.882307692307690559e+02 3.171918334960937500e+02 -2.112274169921875000e+00 0.000000000000000000e+00 0.000000000000000000e+00 1.274744262695312500e+03 1.415042400360107422e+00 1.000000000000000000e+00 2.872714614868164062e+01 -1.562500000000000000e+02 5.925000000000000000e+01
9.000000000000000000e+00 7.123615384615379753e+02 3.855746765136718750e+02 -1.916687011718750000e+00 0.000000000000000000e+00 0.000000000000000000e+00 1.218759643554687500e+03 1.372744441032409668e+00 1.000000000000000000e+00 3.396560668945312500e+02 -1.552500000000000000e+02 5.925000000000000000e+01
1.000000000000000000e+00 5.663692307692306258e+02 6.001725463867187500e+02 -2.729431152343750000e+00 9.999999776482582092e-03 0.000000000000000000e+00 9.165169067382812500e+02 1.069942355155944824e+00 1.000000000000000000e+00 9.901111450195312500e+02 -1.342500000000000000e+02 5.925000000000000000e+01
6.100000000000000000e+01 4.721461538461538794e+02 6.197905273437500000e+02 -3.825286865234375000e+00 1.161423698067665100e-01 2.352941185235977173e-01 7.563543701171875000e+02 5.605302453041076660e-01 4.000000000000000000e+00 8.540681762695312500e+02 -1.332500000000000000e+02 5.925000000000000000e+01
3.500000000000000000e+01 4.666615384615386120e+02 6.007482910156250000e+02 -4.285705566406250000e+00 9.999999776482582092e-03 0.000000000000000000e+00 7.468086547851562500e+02 5.737354159355163574e-01 3.000000000000000000e+00 9.994808349609375000e+02 -1.327500000000000000e+02 5.925000000000000000e+01
6.100000000000000000e+01 4.677000000000001023e+02 5.515164794921875000e+02 -4.716949462890625000e+00 9.999999776482582092e-03 0.000000000000000000e+00 7.607747802734375000e+02 6.074812412261962891e-01 4.000000000000000000e+00 9.700443725585937500e+02 -1.322500000000000000e+02 5.925000000000000000e+01
6.700000000000000000e+01 4.531846153846153697e+02 4.517094116210937500e+02 -5.148193359375000000e+00 1.107365563511848450e-01 0.000000000000000000e+00 7.747409057617187500e+02 6.950842142105102539e-01 4.000000000000000000e+00 9.389863891601562500e+02 -1.317500000000000000e+02 5.925000000000000000e+01
2.600000000000000000e+01 4.428538461538461775e+02 3.503832397460937500e+02 -5.579437255859375000e+00 3.869715034961700439e-01 0.000000000000000000e+00 7.887070922851562500e+02 1.178842186927795410e+00 3.000000000000000000e+00 1.512953125000000000e+03 -1.312500000000000000e+02 5.925000000000000000e+01
1.100000000000000000e+01 4.631769230769229466e+02 2.933020019531250000e+02 -5.908782958984375000e+00 2.903029918670654297e-01 0.000000000000000000e+00 7.944076538085937500e+02 1.141326069831848145e+00 1.000000000000000000e+00 1.299187622070312500e+03 -1.307500000000000000e+02 5.925000000000000000e+01
1.800000000000000000e+01 5.052153846153847212e+02 2.503099670410156250e+02 -6.238128662109375000e+00 3.484050631523132324e-01 0.000000000000000000e+00 8.001082153320312500e+02 1.111364722251892090e+00 1.000000000000000000e+00 1.256541503906250000e+03 -1.302500000000000000e+02 5.925000000000000000e+01
1.800000000000000000e+01 5.031538461538459615e+02 2.061179809570312500e+02 -6.829284667968750000e+00 3.551302254199981689e-01 0.000000000000000000e+00 8.111096191406250000e+02 5.908663868904113770e-01 1.000000000000000000e+00 1.074689331054687500e+03 -1.292500000000000000e+02 5.925000000000000000e+01
2.000000000000000000e+00 4.558923076923077247e+02 1.981125793457031250e+02 -6.888488769531250000e+00 8.232823610305786133e-01 0.000000000000000000e+00 8.152109375000000000e+02 6.085106134414672852e-01 1.000000000000000000e+00 1.743676635742187500e+03 -1.287500000000000000e+02 5.925000000000000000e+01
2.100000000000000000e+01 4.351999999999998749e+02 1.889929962158203125e+02 -6.947723388671875000e+00 3.353024125099182129e-01 5.294117927551269531e-01 8.193123168945312500e+02 1.167865753173828125e+00 3.000000000000000000e+00 1.056640014648437500e+03 -1.282500000000000000e+02 5.925000000000000000e+01
6.700000000000000000e+01 4.273846153846154721e+02 1.777659606933593750e+02 -7.006958007812500000e+00 9.999999776482582092e-03 3.529411852359771729e-01 8.234136352539062500e+02 1.087562322616577148e+00 4.000000000000000000e+00 7.524107055664062500e+02 -1.277500000000000000e+02 5.925000000000000000e+01
6.500000000000000000e+01 4.334615384615384528e+02 1.814068298339843750e+02 -6.895050048828125000e+00 1.357495188713073730e-01 5.294117927551269531e-01 8.483853759765625000e+02 1.085941672325134277e+00 4.000000000000000000e+00 9.120056762695312500e+02 -1.272500000000000000e+02 5.925000000000000000e+01
6.500000000000000000e+01 4.472615384615385210e+02 1.909485473632812500e+02 -6.611968994140625000e+00 4.215718209743499756e-01 0.000000000000000000e+00 8.942274780273437500e+02 1.613663196563720703e+00 4.000000000000000000e+00 1.156309692382812500e+03 -1.267500000000000000e+02 5.925000000000000000e+01
5.000000000000000000e+01 4.676923076923078497e+02 2.003065643310546875e+02 -6.328918457031250000e+00 4.234376847743988037e-01 0.000000000000000000e+00 9.400695800781250000e+02 8.564016819000244141e-01 4.000000000000000000e+00 1.536651733398437500e+03 -1.262500000000000000e+02 5.925000000000000000e+01
7.300000000000000000e+01 4.889076923076922299e+02 2.088290252685546875e+02 -6.045867919921875000e+00 2.328491806983947754e-01 0.000000000000000000e+00 9.859116821289062500e+02 6.598464250564575195e-01 4.000000000000000000e+00 8.869635009765625000e+02 -1.257500000000000000e+02 5.925000000000000000e+01
6.900000000000000000e+01 5.110538461538459956e+02 2.138784179687500000e+02 -5.587921142578125000e+00 0.000000000000000000e+00 2.941176593303680420e-01 1.086085693359375000e+03 6.884217262268066406e-01 4.000000000000000000e+00 6.997587280273437500e+02 -1.252500000000000000e+02 5.925000000000000000e+01
4.500000000000000000e+01 5.159846153846154948e+02 2.143462829589843750e+02 -5.071716308593750000e+00 9.999999776482582092e-03 2.352941185235977173e-01 1.204370361328125000e+03 7.233546376228332520e-01 4.000000000000000000e+00 5.480402832031250000e+02 -1.247500000000000000e+02 5.925000000000000000e+01
6.500000000000000000e+01 5.037461538461536747e+02 2.147613525390625000e+02 -4.555511474609375000e+00 9.999999776482582092e-03 0.000000000000000000e+00 1.322654907226562500e+03 7.615576982498168945e-01 4.000000000000000000e+00 5.742032470703125000e+02 -1.242500000000000000e+02 5.925000000000000000e+01
5.200000000000000000e+01 4.837230769230770875e+02 2.173598022460937500e+02 -4.039306640625000000e+00 9.999999776482582092e-03 1.176470592617988586e-01 1.440939575195312500e+03 7.839096784591674805e-01 4.000000000000000000e+00 4.090567321777343750e+02 -1.237500000000000000e+02 5.925000000000000000e+01
6.700000000000000000e+01 4.631076923076922753e+02 2.210005950927734375e+02 -3.709869384765625000e+00 9.999999776482582092e-03 5.882352963089942932e-02 1.524226684570312500e+03 7.947662472724914551e-01 4.000000000000000000e+00 3.338952026367187500e+02 -1.232500000000000000e+02 5.925000000000000000e+01
4.100000000000000000e+01 4.395538461538462798e+02 2.238087768554687500e+02 -3.380462646484375000e+00 9.999999776482582092e-03 0.000000000000000000e+00 1.607513793945312500e+03 7.985505461692810059e-01 3.000000000000000000e+00 4.293157958984375000e+02 -1.227500000000000000e+02 5.925000000000000000e+01
6.900000000000000000e+01 4.273923076923076678e+02 2.253087921142578125e+02 -3.051025390625000000e+00 9.999999776482582092e-03 2.352941185235977173e-01 1.690800903320312500e+03 7.847914099693298340e-01 4.000000000000000000e+00 4.815521545410156250e+02 -1.222500000000000000e+02 5.925000000000000000e+01
5.100000000000000000e+01 4.225076923076924231e+02 2.252468566894531250e+02 -2.777008056640625000e+00 1.069807708263397217e-01 0.000000000000000000e+00 1.767261352539062500e+03 8.568632006645202637e-01 4.000000000000000000e+00 5.987190551757812500e+02 -1.217500000000000000e+02 5.925000000000000000e+01
5.700000000000000000e+01 4.101769230769232308e+02 2.249274749755859375e+02 -2.669189453125000000e+00 1.289766877889633179e-01 9.411764740943908691e-01 1.823241821289062500e+03 1.836813926696777344e+00 4.000000000000000000e+00 6.520387573242187500e+02 -1.212500000000000000e+02 5.925000000000000000e+01
5.200000000000000000e+01 4.059769230769231285e+02 2.246019592285156250e+02 -2.561370849609375000e+00 1.467883437871932983e-01 2.941176593303680420e-01 1.879222167968750000e+03 9.263657331466674805e-01 4.000000000000000000e+00 6.636641845703125000e+02 -1.207500000000000000e+02 5.925000000000000000e+01
6.400000000000000000e+01 3.955538461538461661e+02 2.229422760009765625e+02 -2.453582763671875000e+00 9.999999776482582092e-03 0.000000000000000000e+00 1.935202636718750000e+03 8.080329298973083496e-01 4.000000000000000000e+00 4.392899780273437500e+02 -1.202500000000000000e+02 5.925000000000000000e+01
4.700000000000000000e+01 3.938999999999999773e+02 2.193304595947265625e+02 -2.440948486328125000e+00 1.210087239742279053e-01 4.705882370471954346e-01 1.973962402343750000e+03 1.845304965972900391e+00 4.000000000000000000e+00 5.753845214843750000e+02 -1.197500000000000000e+02 5.925000000000000000e+01
4.100000000000000000e+01 3.957307692307689990e+02 2.146067504882812500e+02 -2.523529052734375000e+00 1.229731887578964233e-01 7.058823704719543457e-01 1.995501464843750000e+03 1.297066688537597656e+00 3.000000000000000000e+00 5.564678955078125000e+02 -1.192500000000000000e+02 5.925000000000000000e+01
6.700000000000000000e+01 3.908769230769231058e+02 2.120065612792968750e+02 -2.606079101562500000e+00 1.502601802349090576e-01 7.058823704719543457e-01 2.017040649414062500e+03 1.680883765220642090e+00 4.000000000000000000e+00 5.753912963867187500e+02 -1.187500000000000000e+02 5.925000000000000000e+01
4.700000000000000000e+01 3.800384615384616609e+02 2.084234771728515625e+02 -2.688659667968750000e+00 9.999999776482582092e-03 1.764705926179885864e-01 2.038579711914062500e+03 1.066667556762695312e+00 4.000000000000000000e+00 3.957033081054687500e+02 -1.182500000000000000e+02 5.925000000000000000e+01
3.800000000000000000e+01 3.720230769230769852e+02 2.033414611816406250e+02 -2.792358398437500000e+00 1.011370941996574402e-01 5.294117927551269531e-01 2.045425659179687500e+03 7.715992927551269531e-01 3.000000000000000000e+00 3.522026367187500000e+02 -1.177500000000000000e+02 5.925000000000000000e+01
3.300000000000000000e+01 3.601384615384613994e+02 1.971215362548828125e+02 -2.903076171875000000e+00 1.126558035612106323e-01 3.529411852359771729e-01 2.047373901367187500e+03 7.712138295173645020e-01 3.000000000000000000e+00 3.598852539062500000e+02 -1.172500000000000000e+02 5.925000000000000000e+01
2.400000000000000000e+01 3.623384615384612744e+02 1.942418060302734375e+02 -3.013824462890625000e+00 1.591384410858154297e-01 5.882352963089942932e-02 2.049322021484375000e+03 8.845630884170532227e-01 3.000000000000000000e+00 4.436405334472656250e+02 -1.167500000000000000e+02 5.925000000000000000e+01
3.800000000000000000e+01 3.727230769230769170e+02 1.939594573974609375e+02 -3.124542236328125000e+00 3.723830282688140869e-01 5.294117927551269531e-01 2.051270263671875000e+03 1.647759079933166504e+00 3.000000000000000000e+00 7.815612792968750000e+02 -1.162500000000000000e+02 5.925000000000000000e+01
1.600000000000000000e+01 3.886692307692306940e+02 1.930708007812500000e+02 -3.213684082031250000e+00 4.513759016990661621e-01 0.000000000000000000e+00 2.038597778320312500e+03 1.714029192924499512e+00 1.000000000000000000e+00 9.075892333984375000e+02 -1.157500000000000000e+02 5.925000000000000000e+01
2.800000000000000000e+01 3.927230769230770875e+02 1.899723663330078125e+02 -3.302795410156250000e+00 4.433399736881256104e-01 5.882353186607360840e-01 2.025925292968750000e+03 1.663016080856323242e+00 3.000000000000000000e+00 8.828629760742187500e+02 -1.152500000000000000e+02 5.925000000000000000e+01
3.000000000000000000e+01 3.846384615384615699e+02 1.767370147705078125e+02 -3.476501464843750000e+00 4.667664766311645508e-01 8.235294222831726074e-01 1.999411743164062500e+03 1.149738311767578125e+00 3.000000000000000000e+00 7.989467163085937500e+02 -1.142500000000000000e+02 5.925000000000000000e+01
4.400000000000000000e+01 3.571692307692308077e+02 1.696138916015625000e+02 -3.547332763671875000e+00 1.308690756559371948e-01 6.470588445663452148e-01 1.982064941406250000e+03 7.522522211074829102e-01 3.000000000000000000e+00 3.041072082519531250e+02 -1.137500000000000000e+02 5.925000000000000000e+01
3.700000000000000000e+01 3.569461538461539476e+02 1.671310424804687500e+02 -3.618164062500000000e+00 1.401275992393493652e-01 1.588235259056091309e+00 1.964718017578125000e+03 7.725654244422912598e-01 3.000000000000000000e+00 2.853206481933593750e+02 -1.132500000000000000e+02 5.925000000000000000e+01
2.400000000000000000e+01 3.603615384615385437e+02 1.691770324707031250e+02 -3.688964843750000000e+00 1.346904188394546509e-01 1.235294103622436523e+00 1.947371215820312500e+03 7.778527140617370605e-01 3.000000000000000000e+00 2.602776794433593750e+02 -1.127500000000000000e+02 5.925000000000000000e+01
4.500000000000000000e+01 3.661230769230768374e+02 1.723201751708984375e+02 -3.744018554687500000e+00 1.462918817996978760e-01 0.000000000000000000e+00 1.927853393554687500e+03 7.790979743003845215e-01 4.000000000000000000e+00 2.619551086425781250e+02 -1.122500000000000000e+02 5.925000000000000000e+01
5.000000000000000000e+01 3.641384615384615699e+02 1.758897094726562500e+02 -3.783264160156250000e+00 1.465495377779006958e-01 0.000000000000000000e+00 1.906164794921875000e+03 7.828536033630371094e-01 4.000000000000000000e+00 2.434073333740234375e+02 -1.117500000000000000e+02 5.925000000000000000e+01
3.300000000000000000e+01 3.664307692307692150e+02 1.784054412841796875e+02 -3.822479248046875000e+00 1.479393839836120605e-01 1.058823585510253906e+00 1.884476074218750000e+03 8.828405737876892090e-01 3.000000000000000000e+00 2.318492584228515625e+02 -1.112500000000000000e+02 5.925000000000000000e+01
2.200000000000000000e+01 3.682615384615384073e+02 2.309667968750000000e+02 -4.874328613281250000e+00 2.683947980403900146e-01 5.882353186607360840e-01 1.644310180664062500e+03 1.819936156272888184e+00 3.000000000000000000e+00 2.440872802734375000e+02 -1.072500000000000000e+02 5.925000000000000000e+01
5.100000000000000000e+01 4.195000000000000000e+02 2.598552246093750000e+02 -6.031341552734375000e+00 5.126227140426635742e-01 9.411764740943908691e-01 1.491312011718750000e+03 1.707285881042480469e+00 4.000000000000000000e+00 3.690975341796875000e+02 -1.047500000000000000e+02 5.925000000000000000e+01
3.100000000000000000e+01 4.326153846153846416e+02 2.751323242187500000e+02 -6.278381347656250000e+00 5.642337799072265625e-01 8.823529481887817383e-01 1.467660644531250000e+03 1.374882102012634277e+00 3.000000000000000000e+00 3.781706237792968750e+02 -1.042500000000000000e+02 5.925000000000000000e+01
3.400000000000000000e+01 4.316538461538461320e+02 3.188615722656250000e+02 -6.989196777343750000e+00 6.867663860321044922e-01 0.000000000000000000e+00 1.401272705078125000e+03 8.979055881500244141e-01 3.000000000000000000e+00 4.385353698730468750e+02 -1.027500000000000000e+02 5.925000000000000000e+01
3.200000000000000000e+01 4.162846153846154493e+02 3.242938842773437500e+02 -7.195770263671875000e+00 7.250764966011047363e-01 0.000000000000000000e+00 1.383709472656250000e+03 1.593579173088073730e+00 3.000000000000000000e+00 4.247587890625000000e+02 -1.022500000000000000e+02 5.925000000000000000e+01
1.900000000000000000e+01 4.105846153846154039e+02 3.238651428222656250e+02 -7.402343750000000000e+00 7.602939009666442871e-01 0.000000000000000000e+00 1.366146118164062500e+03 1.563656687736511230e+00 1.000000000000000000e+00 4.027012939453125000e+02 -1.017500000000000000e+02 5.925000000000000000e+01
1.900000000000000000e+01 4.031846153846153697e+02 3.201113891601562500e+02 -7.608917236328125000e+00 7.794455289840698242e-01 0.000000000000000000e+00 1.348582885742187500e+03 1.566900968551635742e+00 1.000000000000000000e+00 3.979218444824218750e+02 -1.012500000000000000e+02 5.925000000000000000e+01
3.000000000000000000e+01 3.935153846153845052e+02 3.061887207031250000e+02 -7.820800781250000000e+00 7.931823730468750000e-01 5.294117927551269531e-01 1.327050903320312500e+03 1.278576493263244629e+00 3.000000000000000000e+00 3.407077941894531250e+02 -1.002500000000000000e+02 5.925000000000000000e+01
6.000000000000000000e+00 6.045307692307691241e+02 2.440334625244140625e+02 -1.178619384765625000e+00 9.999999776482582092e-03 0.000000000000000000e+00 1.404621093750000000e+03 1.347933411598205566e+00 1.000000000000000000e+00 1.739257812500000000e+01 -1.617500000000000000e+02 5.975000000000000000e+01
4.000000000000000000e+00 5.825538461538460524e+02 2.419282073974609375e+02 -1.478729248046875000e+00 9.999999776482582092e-03 0.000000000000000000e+00 1.422717651367187500e+03 1.316154837608337402e+00 1.000000000000000000e+00 1.323990325927734375e+02 -1.612500000000000000e+02 5.975000000000000000e+01
6.000000000000000000e+00 5.555384615384616609e+02 2.379585571289062500e+02 -1.806823730468750000e+00 9.999999776482582092e-03 0.000000000000000000e+00 1.363938842773437500e+03 1.258289217948913574e+00 1.000000000000000000e+00 3.185147705078125000e+02 -1.607500000000000000e+02 5.975000000000000000e+01
6.000000000000000000e+00 5.439153846153843688e+02 2.341212921142578125e+02 -2.134948730468750000e+00 1.999669373035430908e-01 0.000000000000000000e+00 1.305159912109375000e+03 1.214372992515563965e+00 1.000000000000000000e+00 5.474117431640625000e+02 -1.602500000000000000e+02 5.975000000000000000e+01
1.000000000000000000e+01 5.380923076923079407e+02 2.307136077880859375e+02 -2.463073730468750000e+00 1.220046803355216980e-01 0.000000000000000000e+00 1.246381103515625000e+03 1.211395740509033203e+00 1.000000000000000000e+00 5.064688110351562500e+02 -1.597500000000000000e+02 5.975000000000000000e+01
7.000000000000000000e+00 5.307076923076924686e+02 2.252395324707031250e+02 -2.871826171875000000e+00 9.999999776482582092e-03 0.000000000000000000e+00 1.291026733398437500e+03 1.366489648818969727e+00 1.000000000000000000e+00 1.410303955078125000e+02 -1.582500000000000000e+02 5.975000000000000000e+01
3.100000000000000000e+01 5.241538461538459615e+02 2.385602874755859375e+02 -2.944091796875000000e+00 9.999999776482582092e-03 0.000000000000000000e+00 1.330462158203125000e+03 1.388224959373474121e+00 3.000000000000000000e+00 1.286154632568359375e+02 -1.577500000000000000e+02 5.975000000000000000e+01
1.100000000000000000e+01 5.180999999999999091e+02 2.634578247070312500e+02 -2.979949951171875000e+00 9.999999776482582092e-03 0.000000000000000000e+00 1.333072509765625000e+03 1.391515970230102539e+00 1.000000000000000000e+00 6.247430038452148438e+01 -1.572500000000000000e+02 5.975000000000000000e+01
1.200000000000000000e+01 5.253230769230767692e+02 2.955141296386718750e+02 -2.979370117187500000e+00 9.999999776482582092e-03 0.000000000000000000e+00 1.298857666015625000e+03 1.380025506019592285e+00 1.000000000000000000e+00 8.043595886230468750e+01 -1.567500000000000000e+02 5.975000000000000000e+01
5.000000000000000000e+00 5.518923076923078952e+02 3.220893859863281250e+02 -2.978759765625000000e+00 9.999999776482582092e-03 0.000000000000000000e+00 1.264642944335937500e+03 1.366965293884277344e+00 1.000000000000000000e+00 2.253111114501953125e+02 -1.562500000000000000e+02 5.975000000000000000e+01
4.000000000000000000e+00 6.022923076923077588e+02 3.415584106445312500e+02 -2.978179931640625000e+00 9.999999776482582092e-03 0.000000000000000000e+00 1.230428100585937500e+03 1.362261414527893066e+00 1.000000000000000000e+00 1.801827392578125000e+02 -1.557500000000000000e+02 5.975000000000000000e+01
1.100000000000000000e+01 7.535384615384614335e+02 4.790878906250000000e+02 -2.291259765625000000e+00 0.000000000000000000e+00 0.000000000000000000e+00 1.039033935546875000e+03 1.339498639106750488e+00 1.000000000000000000e+00 5.349450683593750000e+02 -1.537500000000000000e+02 5.975000000000000000e+01
0.000000000000000000e+00 6.471769230769231172e+02 5.731270751953125000e+02 -2.771667480468750000e+00 2.702982127666473389e-01 0.000000000000000000e+00 9.286536254882812500e+02 1.590933799743652344e+00 1.000000000000000000e+00 1.019334533691406250e+03 -1.357500000000000000e+02 5.975000000000000000e+01
2.000000000000000000e+00 5.745923076923074859e+02 5.056601867675781250e+02 -3.066040039062500000e+00 1.965305060148239136e-01 0.000000000000000000e+00 9.201816406250000000e+02 1.203789591789245605e+00 1.000000000000000000e+00 1.190659179687500000e+03 -1.352500000000000000e+02 5.975000000000000000e+01
7.000000000000000000e+00 4.640846153846153470e+02 5.057530822753906250e+02 -3.390167236328125000e+00 2.637585401535034180e-01 0.000000000000000000e+00 9.057973632812500000e+02 1.022016882896423340e+00 1.000000000000000000e+00 1.345238769531250000e+03 -1.347500000000000000e+02 5.975000000000000000e+01
6.000000000000000000e+01 3.330923076923078270e+02 4.638371582031250000e+02 -4.097991943359375000e+00 9.999999776482582092e-03 0.000000000000000000e+00 8.652045288085937500e+02 7.419635653495788574e-01 4.000000000000000000e+00 7.893731079101562500e+02 -1.337500000000000000e+02 5.975000000000000000e+01
3.400000000000000000e+01 3.426230769230767237e+02 3.940972900390625000e+02 -4.451904296875000000e+00 3.487506508827209473e-01 0.000000000000000000e+00 8.449081420898437500e+02 9.942336678504943848e-01 3.000000000000000000e+00 1.194138061523437500e+03 -1.332500000000000000e+02 5.975000000000000000e+01
5.000000000000000000e+00 3.961846153846154834e+02 2.714375610351562500e+02 -5.852966308593750000e+00 3.990582823753356934e-01 6.470588445663452148e-01 7.849610595703125000e+02 5.949561595916748047e-01 1.000000000000000000e+00 1.174054199218750000e+03 -1.317500000000000000e+02 5.975000000000000000e+01
1.600000000000000000e+01 4.136076923076925027e+02 2.263249816894531250e+02 -6.330261230468750000e+00 4.545477032661437988e-01 5.882353186607360840e-01 7.650072631835937500e+02 9.465603232383728027e-01 1.000000000000000000e+00 1.399968261718750000e+03 -1.312500000000000000e+02 5.975000000000000000e+01
9.000000000000000000e+00 4.440615384615381913e+02 1.970726318359375000e+02 -6.509613037109375000e+00 3.722103834152221680e-01 5.882353186607360840e-01 7.848062744140625000e+02 1.074773788452148438e+00 1.000000000000000000e+00 1.313044067382812500e+03 -1.307500000000000000e+02 5.975000000000000000e+01
2.600000000000000000e+01 4.820076923076920821e+02 1.838570098876953125e+02 -6.688995361328125000e+00 5.777034163475036621e-01 2.352941185235977173e-01 8.046052856445312500e+02 9.353083372116088867e-01 3.000000000000000000e+00 1.184620117187500000e+03 -1.302500000000000000e+02 5.975000000000000000e+01
4.000000000000000000e+01 4.811692307692309214e+02 1.676094818115234375e+02 -6.992950439453125000e+00 2.316414117813110352e-01 8.235294222831726074e-01 8.440927734375000000e+02 1.625555157661437988e+00 3.000000000000000000e+00 8.184263916015625000e+02 -1.292500000000000000e+02 5.975000000000000000e+01
6.200000000000000000e+01 4.396153846153846985e+02 1.621161346435546875e+02 -6.953277587890625000e+00 3.406750857830047607e-01 8.235294222831726074e-01 8.634495849609375000e+02 1.679253816604614258e+00 4.000000000000000000e+00 9.697003173828125000e+02 -1.287500000000000000e+02 5.975000000000000000e+01
6.800000000000000000e+01 4.319769230769230148e+02 1.580616302490234375e+02 -6.913604736328125000e+00 1.943202614784240723e-01 2.941176593303680420e-01 8.828063964843750000e+02 1.718725085258483887e+00 4.000000000000000000e+00 7.569404907226562500e+02 -1.282500000000000000e+02 5.975000000000000000e+01
4.900000000000000000e+01 4.320153846153845052e+02 1.564353790283203125e+02 -6.873931884765625000e+00 2.505612969398498535e-01 2.352941185235977173e-01 9.021632080078125000e+02 9.145470261573791504e-01 4.000000000000000000e+00 8.741679077148437500e+02 -1.277500000000000000e+02 5.975000000000000000e+01
4.400000000000000000e+01 4.426076923076923322e+02 1.655668029785156250e+02 -6.686614990234375000e+00 1.220527961850166321e-01 1.117647051811218262e+00 9.385908203125000000e+02 7.180809974670410156e-01 3.000000000000000000e+00 7.404273071289062500e+02 -1.272500000000000000e+02 5.975000000000000000e+01
5.400000000000000000e+01 4.579615384615386233e+02 1.800220336914062500e+02 -6.351654052734375000e+00 1.255753934383392334e-01 1.352941155433654785e+00 9.920892333984375000e+02 1.466585993766784668e+00 4.000000000000000000e+00 8.153703002929687500e+02 -1.267500000000000000e+02 5.975000000000000000e+01
6.100000000000000000e+01 4.709230769230768487e+02 1.916608581542968750e+02 -6.016693115234375000e+00 3.470937311649322510e-01 0.000000000000000000e+00 1.045587646484375000e+03 1.136324167251586914e+00 4.000000000000000000e+00 1.150001586914062500e+03 -1.262500000000000000e+02 5.975000000000000000e+01
4.800000000000000000e+01 4.822615384615385210e+02 1.983026885986328125e+02 -5.681701660156250000e+00 4.128787517547607422e-01 0.000000000000000000e+00 1.099086059570312500e+03 6.622467041015625000e-01 4.000000000000000000e+00 1.243783325195312500e+03 -1.257500000000000000e+02 5.975000000000000000e+01
6.800000000000000000e+01 4.942307692307692264e+02 2.025946960449218750e+02 -5.270477294921875000e+00 2.147058695554733276e-01 0.000000000000000000e+00 1.187703613281250000e+03 9.871142506599426270e-01 4.000000000000000000e+00 1.054157348632812500e+03 -1.252500000000000000e+02 5.975000000000000000e+01
7.000000000000000000e+01 4.961769230769226624e+02 2.024164276123046875e+02 -4.833862304687500000e+00 9.999999776482582092e-03 1.176470592617988586e-01 1.288027587890625000e+03 7.439795732498168945e-01 4.000000000000000000e+00 6.162993774414062500e+02 -1.247500000000000000e+02 5.975000000000000000e+01
5.200000000000000000e+01 4.850769230769232649e+02 2.011849060058593750e+02 -4.397216796875000000e+00 9.999999776482582092e-03 2.941176593303680420e-01 1.388351440429687500e+03 7.738730311393737793e-01 4.000000000000000000e+00 4.536556396484375000e+02 -1.242500000000000000e+02 5.975000000000000000e+01
6.600000000000000000e+01 4.689384615384615813e+02 2.015814056396484375e+02 -3.960571289062500000e+00 9.999999776482582092e-03 4.117647111415863037e-01 1.488675292968750000e+03 7.913228869438171387e-01 4.000000000000000000e+00 4.411682739257812500e+02 -1.237500000000000000e+02 5.975000000000000000e+01
4.000000000000000000e+01 4.518076923076923777e+02 2.029719390869140625e+02 -3.683044433593750000e+00 9.999999776482582092e-03 2.941176593303680420e-01 1.566932739257812500e+03 7.837630510330200195e-01 3.000000000000000000e+00 4.697932739257812500e+02 -1.232500000000000000e+02 5.975000000000000000e+01
5.300000000000000000e+01 4.395384615384615472e+02 2.053661346435546875e+02 -3.405517578125000000e+00 1.042447090148925781e-01 3.529411852359771729e-01 1.645190063476562500e+03 7.765149474143981934e-01 4.000000000000000000e+00 5.128389892578125000e+02 -1.227500000000000000e+02 5.975000000000000000e+01
3.700000000000000000e+01 4.323153846153846871e+02 2.078352050781250000e+02 -3.128021240234375000e+00 1.006676554679870605e-01 0.000000000000000000e+00 1.723447509765625000e+03 7.706067562103271484e-01 3.000000000000000000e+00 4.992214050292968750e+02 -1.222500000000000000e+02 5.975000000000000000e+01
4.300000000000000000e+01 4.172384615384615927e+02 2.078807678222656250e+02 -2.905029296875000000e+00 9.999999776482582092e-03 0.000000000000000000e+00 1.794551879882812500e+03 9.980292916297912598e-01 3.000000000000000000e+00 4.579580383300781250e+02 -1.217500000000000000e+02 5.975000000000000000e+01
3.900000000000000000e+01 4.034692307692307054e+02 2.071923675537109375e+02 -2.845611572265625000e+00 1.092506870627403259e-01 0.000000000000000000e+00 1.844197021484375000e+03 1.881019353866577148e+00 3.000000000000000000e+00 4.687976379394531250e+02 -1.212500000000000000e+02 5.975000000000000000e+01
3.200000000000000000e+01 3.938307692307691923e+02 2.070323791503906250e+02 -2.786224365234375000e+00 1.222222670912742615e-01 7.058823704719543457e-01 1.893842163085937500e+03 1.874771833419799805e+00 3.000000000000000000e+00 4.868931579589843750e+02 -1.207500000000000000e+02 5.975000000000000000e+01
5.900000000000000000e+01 3.848076923076921503e+02 2.086374206542968750e+02 -2.726806640625000000e+00 1.210410371422767639e-01 7.647058963775634766e-01 1.943487304687500000e+03 1.333489894866943359e+00 4.000000000000000000e+00 4.676181030273437500e+02 -1.202500000000000000e+02 5.975000000000000000e+01
2.100000000000000000e+01 3.749307692307692150e+02 2.094855194091796875e+02 -2.753662109375000000e+00 2.020251899957656860e-01 8.823529481887817383e-01 1.975808837890625000e+03 1.817431330680847168e+00 3.000000000000000000e+00 5.606871948242187500e+02 -1.197500000000000000e+02 5.975000000000000000e+01
2.800000000000000000e+01 3.625076923076921958e+02 2.031631622314453125e+02 -3.093048095703125000e+00 3.375411033630371094e-01 4.117647111415863037e-01 2.020803222656250000e+03 1.735914587974548340e+00 3.000000000000000000e+00 7.350913085937500000e+02 -1.182500000000000000e+02 5.975000000000000000e+01
3.700000000000000000e+01 3.586615384615385551e+02 2.026952514648437500e+02 -3.208099365234375000e+00 3.330695927143096924e-01 2.941176593303680420e-01 2.023968017578125000e+03 1.385312557220458984e+00 3.000000000000000000e+00 6.486932373046875000e+02 -1.177500000000000000e+02 5.975000000000000000e+01
3.000000000000000000e+01 3.358076923076923777e+02 2.033396453857421875e+02 -3.323791503906250000e+00 1.445514410734176636e-01 5.294117927551269531e-01 2.023188354492187500e+03 8.174466490745544434e-01 3.000000000000000000e+00 3.177405395507812500e+02 -1.172500000000000000e+02 5.975000000000000000e+01
3.000000000000000000e+01 3.420769230769229239e+02 2.043097381591796875e+02 -3.439483642578125000e+00 1.538262218236923218e-01 5.882353186607360840e-01 2.022408813476562500e+03 9.498770833015441895e-01 3.000000000000000000e+00 3.137530517578125000e+02 -1.167500000000000000e+02 5.975000000000000000e+01
2.100000000000000000e+01 3.517615384615382368e+02 2.069342651367187500e+02 -3.555175781250000000e+00 1.820138394832611084e-01 7.647058963775634766e-01 2.021629272460937500e+03 8.052815794944763184e-01 3.000000000000000000e+00 3.553248901367187500e+02 -1.162500000000000000e+02 5.975000000000000000e+01
2.900000000000000000e+01 3.582461538461539021e+02 2.073571319580078125e+02 -3.647064208984375000e+00 2.042790055274963379e-01 5.882352963089942932e-02 2.004958007812500000e+03 1.045534253120422363e+00 3.000000000000000000e+00 3.750621948242187500e+02 -1.157500000000000000e+02 5.975000000000000000e+01
4.900000000000000000e+01 3.629000000000000341e+02 2.050960083007812500e+02 -3.738983154296875000e+00 2.234824597835540771e-01 2.941176593303680420e-01 1.988286865234375000e+03 7.263798713684082031e-01 4.000000000000000000e+00 4.195102233886718750e+02 -1.152500000000000000e+02 5.975000000000000000e+01
5.500000000000000000e+01 3.546307692307691468e+02 2.008279724121093750e+02 -3.830871582031250000e+00 2.184340357780456543e-01 0.000000000000000000e+00 1.971615600585937500e+03 7.289935350418090820e-01 4.000000000000000000e+00 3.848969421386718750e+02 -1.147500000000000000e+02 5.975000000000000000e+01
4.100000000000000000e+01 3.440461538461538566e+02 1.812930450439453125e+02 -3.964996337890625000e+00 2.012936472892761230e-01 1.235294103622436523e+00 1.937558227539062500e+03 7.522511482238769531e-01 3.000000000000000000e+00 3.154795227050781250e+02 -1.137500000000000000e+02 5.975000000000000000e+01
2.000000000000000000e+01 3.516615384615384983e+02 1.763384704589843750e+02 -4.017181396484375000e+00 1.957515031099319458e-01 4.705882370471954346e-01 1.920315063476562500e+03 7.552937269210815430e-01 3.000000000000000000e+00 2.780803833007812500e+02 -1.132500000000000000e+02 5.975000000000000000e+01
2.200000000000000000e+01 3.555076923076921958e+02 1.750257873535156250e+02 -4.069366455078125000e+00 1.966142505407333374e-01 5.294117927551269531e-01 1.903071899414062500e+03 7.614371180534362793e-01 3.000000000000000000e+00 2.621875305175781250e+02 -1.127500000000000000e+02 5.975000000000000000e+01
6.100000000000000000e+01 3.580230769230769283e+02 1.758305664062500000e+02 -4.106353759765625000e+00 1.989638805389404297e-01 9.411764740943908691e-01 1.882854614257812500e+03 7.666464447975158691e-01 4.000000000000000000e+00 2.617235107421875000e+02 -1.122500000000000000e+02 5.975000000000000000e+01
3.400000000000000000e+01 3.629769230769230148e+02 1.767834777832031250e+02 -4.128204345703125000e+00 1.941994726657867432e-01 8.823529481887817383e-01 1.859663452148437500e+03 7.683582901954650879e-01 3.000000000000000000e+00 2.211572875976562500e+02 -1.117500000000000000e+02 5.975000000000000000e+01
3.200000000000000000e+01 3.578384615384615586e+02 1.766924743652343750e+02 -4.150054931640625000e+00 2.096556276082992554e-01 0.000000000000000000e+00 1.836472167968750000e+03 7.614876031875610352e-01 3.000000000000000000e+00 2.521405944824218750e+02 -1.112500000000000000e+02 5.975000000000000000e+01
2.700000000000000000e+01 3.617999999999999545e+02 1.765777282714843750e+02 -4.171905517578125000e+00 2.580102682113647461e-01 2.941176593303680420e-01 1.813280883789062500e+03 1.813094615936279297e+00 3.000000000000000000e+00 2.962727966308593750e+02 -1.107500000000000000e+02 5.975000000000000000e+01
3.800000000000000000e+01 3.608615384615383732e+02 1.767830047607421875e+02 -4.252288818359375000e+00 2.976856231689453125e-01 5.882353186607360840e-01 1.785111816406250000e+03 1.789754152297973633e+00 3.000000000000000000e+00 3.454747924804687500e+02 -1.102500000000000000e+02 5.975000000000000000e+01
2.300000000000000000e+01 3.615999999999999659e+02 2.073857421875000000e+02 -4.757446289062500000e+00 4.079051315784454346e-01 6.470588445663452148e-01 1.658358642578125000e+03 1.312538146972656250e+00 3.000000000000000000e+00 4.313299865722656250e+02 -1.082500000000000000e+02 5.975000000000000000e+01
3.100000000000000000e+01 3.673846153846153584e+02 2.178907470703125000e+02 -4.962921142578125000e+00 4.506655335426330566e-01 6.470588445663452148e-01 1.621090454101562500e+03 1.049755573272705078e+00 3.000000000000000000e+00 4.327191772460937500e+02 -1.077500000000000000e+02 5.975000000000000000e+01
3.400000000000000000e+01 3.787384615384615927e+02 2.279303588867187500e+02 -5.168395996093750000e+00 4.850573539733886719e-01 1.000000000000000000e+00 1.583822143554687500e+03 1.380866527557373047e+00 3.000000000000000000e+00 4.359270629882812500e+02 -1.072500000000000000e+02 5.975000000000000000e+01
4.000000000000000000e+01 3.821461538461539362e+02 2.350988922119140625e+02 -5.388397216796875000e+00 5.037751197814941406e-01 2.941176593303680420e-01 1.547670166015625000e+03 1.693778991699218750e+00 3.000000000000000000e+00 4.499897155761718750e+02 -1.067500000000000000e+02 5.975000000000000000e+01
3.400000000000000000e+01 3.964615384615384528e+02 2.426032867431640625e+02 -5.915405273437500000e+00 6.169965863227844238e-01 9.411764740943908691e-01 1.482063110351562500e+03 1.311870813369750977e+00 3.000000000000000000e+00 4.659799804687500000e+02 -1.057500000000000000e+02 5.975000000000000000e+01
3.600000000000000000e+01 4.040076923076923094e+02 2.450157928466796875e+02 -6.178894042968750000e+00 6.563085317611694336e-01 5.882353186607360840e-01 1.449259521484375000e+03 7.682874798774719238e-01 3.000000000000000000e+00 4.768900146484375000e+02 -1.052500000000000000e+02 5.975000000000000000e+01
2.900000000000000000e+01 4.093769230769230489e+02 2.514351654052734375e+02 -6.449829101562500000e+00 6.795511841773986816e-01 6.470588445663452148e-01 1.419990112304687500e+03 1.405444502830505371e+00 3.000000000000000000e+00 4.242952575683593750e+02 -1.047500000000000000e+02 5.975000000000000000e+01
1.400000000000000000e+01 4.174384615384615813e+02 2.597075195312500000e+02 -6.728210449218750000e+00 6.693766713142395020e-01 5.294117927551269531e-01 1.394254638671875000e+03 6.564387679100036621e-01 1.000000000000000000e+00 3.977981872558593750e+02 -1.042500000000000000e+02 5.975000000000000000e+01
3.800000000000000000e+01 4.185923076923077701e+02 2.696620788574218750e+02 -7.006591796875000000e+00 7.079144120216369629e-01 0.000000000000000000e+00 1.368519165039062500e+03 6.487171053886413574e-01 3.000000000000000000e+00 4.234462890625000000e+02 -1.037500000000000000e+02 5.975000000000000000e+01
2.300000000000000000e+01 4.157538461538461547e+02 2.772089233398437500e+02 -7.284973144531250000e+00 7.429201006889343262e-01 6.470588445663452148e-01 1.342783691406250000e+03 6.432303190231323242e-01 3.000000000000000000e+00 4.347746276855468750e+02 -1.032500000000000000e+02 5.975000000000000000e+01
1.900000000000000000e+01 4.051846153846154266e+02 2.830945129394531250e+02 -7.515930175781250000e+00 7.704131603240966797e-01 0.000000000000000000e+00 1.324103149414062500e+03 6.371616125106811523e-01 1.000000000000000000e+00 4.114576416015625000e+02 -1.027500000000000000e+02 5.975000000000000000e+01
3.000000000000000000e+01 3.960692307692306144e+02 2.838427429199218750e+02 -7.731079101562500000e+00 7.894581556320190430e-01 0.000000000000000000e+00 1.307774169921875000e+03 6.310902833938598633e-01 3.000000000000000000e+00 3.956620483398437500e+02 -1.022500000000000000e+02 5.975000000000000000e+01
1.800000000000000000e+01 3.937923076923076451e+02 2.795530090332031250e+02 -7.946228027343750000e+00 8.359684944152832031e-01 2.941176593303680420e-01 1.291445190429687500e+03 6.241801977157592773e-01 1.000000000000000000e+00 4.226298217773437500e+02 -1.017500000000000000e+02 5.975000000000000000e+01
1.900000000000000000e+01 3.885153846153845052e+02 2.725085449218750000e+02 -8.161376953125000000e+00 8.339108824729919434e-01 0.000000000000000000e+00 1.275116210937500000e+03 6.457061767578125000e-01 1.000000000000000000e+00 3.512921142578125000e+02 -1.012500000000000000e+02 5.975000000000000000e+01
2.100000000000000000e+01 3.791307692307692037e+02 2.647839660644531250e+02 -8.252655029296875000e+00 8.490469455718994141e-01 5.882353186607360840e-01 1.264364501953125000e+03 6.712528467178344727e-01 3.000000000000000000e+00 3.417248229980468750e+02 -1.007500000000000000e+02 5.975000000000000000e+01
1.500000000000000000e+01 3.714153846153845961e+02 2.579224853515625000e+02 -8.343933105468750000e+00 8.380729556083679199e-01 0.000000000000000000e+00 1.253612792968750000e+03 1.011105298995971680e+00 1.000000000000000000e+00 2.944928283691406250e+02 -1.002500000000000000e+02 5.975000000000000000e+01
1.700000000000000000e+01 5.806076923076924459e+02 2.796567687988281250e+02 -1.259277343750000000e+00 9.999999776482582092e-03 0.000000000000000000e+00 1.372525512695312500e+03 1.336442947387695312e+00 1.000000000000000000e+00 5.284462451934814453e+00 -1.627500000000000000e+02 6.025000000000000000e+01
7.000000000000000000e+00 5.652692307692307168e+02 2.785454406738281250e+02 -1.876281738281250000e+00 9.999999776482582092e-03 0.000000000000000000e+00 1.410689819335937500e+03 1.380534052848815918e+00 1.000000000000000000e+00 1.261412811279296875e+01 -1.617500000000000000e+02 6.025000000000000000e+01
6.000000000000000000e+00 5.538692307692307395e+02 2.733070068359375000e+02 -2.184753417968750000e+00 9.999999776482582092e-03 0.000000000000000000e+00 1.429771972656250000e+03 1.352609395980834961e+00 1.000000000000000000e+00 5.717155075073242188e+01 -1.612500000000000000e+02 6.025000000000000000e+01
7.000000000000000000e+00 5.366615384615383846e+02 2.650729980468750000e+02 -2.524963378906250000e+00 1.193338781595230103e-01 0.000000000000000000e+00 1.369705444335937500e+03 1.288508057594299316e+00 1.000000000000000000e+00 2.484828491210937500e+02 -1.607500000000000000e+02 6.025000000000000000e+01
1.000000000000000000e+01 5.105000000000000000e+02 2.567614440917968750e+02 -2.865142822265625000e+00 1.241904869675636292e-01 0.000000000000000000e+00 1.309638916015625000e+03 1.114643335342407227e+00 1.000000000000000000e+00 2.905106506347656250e+02 -1.602500000000000000e+02 6.025000000000000000e+01
5.000000000000000000e+00 4.986615384615386120e+02 2.513402709960937500e+02 -3.205352783203125000e+00 3.330771327018737793e-01 0.000000000000000000e+00 1.249572509765625000e+03 1.170221328735351562e+00 1.000000000000000000e+00 7.338483886718750000e+02 -1.597500000000000000e+02 6.025000000000000000e+01
1.900000000000000000e+01 4.810538461538463935e+02 2.471900177001953125e+02 -3.477325439453125000e+00 3.036370277404785156e-01 0.000000000000000000e+00 1.212755004882812500e+03 1.188868165016174316e+00 1.000000000000000000e+00 7.551801757812500000e+02 -1.592500000000000000e+02 6.025000000000000000e+01
1.000000000000000000e+01 5.017000000000001023e+02 2.442859802246093750e+02 -3.544647216796875000e+00 1.050277054309844971e-01 0.000000000000000000e+00 1.245684692382812500e+03 1.397926688194274902e+00 1.000000000000000000e+00 2.245986938476562500e+02 -1.587500000000000000e+02 6.025000000000000000e+01
7.000000000000000000e+00 4.930461538461537430e+02 2.420516967773437500e+02 -3.611938476562500000e+00 1.336445212364196777e-01 0.000000000000000000e+00 1.278614379882812500e+03 2.266260385513305664e+00 1.000000000000000000e+00 2.810821838378906250e+02 -1.582500000000000000e+02 6.025000000000000000e+01
6.000000000000000000e+00 4.929923076923074632e+02 2.461421661376953125e+02 -3.679260253906250000e+00 1.235882267355918884e-01 0.000000000000000000e+00 1.311544189453125000e+03 1.891138434410095215e+00 1.000000000000000000e+00 3.846533813476562500e+02 -1.577500000000000000e+02 6.025000000000000000e+01
7.000000000000000000e+00 5.025076923076924231e+02 2.567321166992187500e+02 -3.713531494140625000e+00 9.999999776482582092e-03 0.000000000000000000e+00 1.314359985351562500e+03 1.361187815666198730e+00 1.000000000000000000e+00 1.896307220458984375e+02 -1.572500000000000000e+02 6.025000000000000000e+01
7.000000000000000000e+00 5.109461538461541181e+02 2.772012329101562500e+02 -3.714752197265625000e+00 1.164474636316299438e-01 0.000000000000000000e+00 1.287061767578125000e+03 1.362630009651184082e+00 1.000000000000000000e+00 2.881431884765625000e+02 -1.567500000000000000e+02 6.025000000000000000e+01
4.000000000000000000e+00 5.304615384615385665e+02 2.890059509277343750e+02 -3.716003417968750000e+00 9.999999776482582092e-03 0.000000000000000000e+00 1.259763671875000000e+03 1.366875290870666504e+00 1.000000000000000000e+00 1.858652954101562500e+02 -1.562500000000000000e+02 6.025000000000000000e+01
7.000000000000000000e+00 5.733461538461538112e+02 2.932834777832031250e+02 -3.717224121093750000e+00 9.999999776482582092e-03 0.000000000000000000e+00 1.232465454101562500e+03 1.367269754409790039e+00 1.000000000000000000e+00 2.740350952148437500e+02 -1.557500000000000000e+02 6.025000000000000000e+01
2.100000000000000000e+01 6.098461538461535838e+02 2.944490051269531250e+02 -3.666717529296875000e+00 9.999999776482582092e-03 0.000000000000000000e+00 1.164655761718750000e+03 1.448526501655578613e+00 3.000000000000000000e+00 3.571293334960937500e+02 -1.552500000000000000e+02 6.025000000000000000e+01
4.300000000000000000e+01 6.475461538461538566e+02 2.905782470703125000e+02 -3.598968505859375000e+00 0.000000000000000000e+00 0.000000000000000000e+00 1.083342407226562500e+03 1.426036357879638672e+00 3.000000000000000000e+00 2.562576904296875000e+02 -1.547500000000000000e+02 6.025000000000000000e+01
2.500000000000000000e+01 6.607923076923075314e+02 3.387477416992187500e+02 -3.463470458984375000e+00 3.769313395023345947e-01 0.000000000000000000e+00 9.207153930664062500e+02 1.206773400306701660e+00 3.000000000000000000e+00 6.830780029296875000e+02 -1.537500000000000000e+02 6.025000000000000000e+01
4.900000000000000000e+01 5.870769230769227534e+02 4.096214599609375000e+02 -1.945190429687500000e-01 0.000000000000000000e+00 2.941176593303680420e-01 1.133518676757812500e+03 1.298679947853088379e+00 4.000000000000000000e+00 2.828878784179687500e+02 -1.507500000000000000e+02 6.025000000000000000e+01
1.700000000000000000e+01 6.225769230769228670e+02 5.278691406250000000e+02 -3.635559082031250000e-01 1.708326488733291626e-01 6.470588445663452148e-01 1.076895629882812500e+03 1.410506725311279297e+00 1.000000000000000000e+00 9.225313720703125000e+02 -1.502500000000000000e+02 6.025000000000000000e+01
6.600000000000000000e+01 6.803923076923074404e+02 6.017977905273437500e+02 -6.750488281250000000e-02 0.000000000000000000e+00 0.000000000000000000e+00 1.116268920898437500e+03 1.796730518341064453e+00 4.000000000000000000e+00 6.563765258789062500e+02 -1.497500000000000000e+02 6.025000000000000000e+01
1.200000000000000000e+01 7.442769230769225715e+02 6.219146728515625000e+02 6.936340332031250000e-01 1.539002507925033569e-01 0.000000000000000000e+00 1.251638671875000000e+03 1.254662752151489258e+00 1.000000000000000000e+00 7.455222167968750000e+02 -1.492500000000000000e+02 6.025000000000000000e+01
2.000000000000000000e+00 5.890076923076925368e+02 6.033205566406250000e+02 -3.748382568359375000e+00 6.380894184112548828e-01 0.000000000000000000e+00 6.460024414062500000e+02 9.600602984428405762e-01 1.000000000000000000e+00 1.333008544921875000e+03 -1.377500000000000000e+02 6.025000000000000000e+01
1.600000000000000000e+01 5.281307692307696016e+02 5.495421142578125000e+02 -3.660827636718750000e+00 2.228131294250488281e-01 0.000000000000000000e+00 7.412103881835937500e+02 1.003955602645874023e+00 1.000000000000000000e+00 9.957880249023437500e+02 -1.372500000000000000e+02 6.025000000000000000e+01
4.000000000000000000e+00 5.058923076923079520e+02 5.328847045898437500e+02 -3.642913818359375000e+00 6.182268261909484863e-01 0.000000000000000000e+00 8.152344970703125000e+02 1.036556601524353027e+00 1.000000000000000000e+00 1.504155273437500000e+03 -1.367500000000000000e+02 6.025000000000000000e+01
1.000000000000000000e+01 4.437615384615383505e+02 4.745620727539062500e+02 -4.025146484375000000e+00 4.778508543968200684e-01 7.647058963775634766e-01 8.361802978515625000e+02 1.106151700019836426e+00 1.000000000000000000e+00 1.494285766601562500e+03 -1.357500000000000000e+02 6.025000000000000000e+01
4.000000000000000000e+00 3.717999999999999545e+02 4.163562622070312500e+02 -4.216247558593750000e+00 4.594671130180358887e-01 0.000000000000000000e+00 8.466531982421875000e+02 9.767361283302307129e-01 1.000000000000000000e+00 1.228341796875000000e+03 -1.352500000000000000e+02 6.025000000000000000e+01
5.200000000000000000e+01 2.809846153846152674e+02 3.543458251953125000e+02 -4.687438964843750000e+00 9.999999776482582092e-03 0.000000000000000000e+00 8.630759887695312500e+02 1.099876642227172852e+00 4.000000000000000000e+00 7.467205200195312500e+02 -1.342500000000000000e+02 6.025000000000000000e+01
3.200000000000000000e+01 2.697846153846153925e+02 2.938409118652343750e+02 -4.937866210937500000e+00 2.156937420368194580e-01 0.000000000000000000e+00 8.705335693359375000e+02 6.900982260704040527e-01 3.000000000000000000e+00 1.015509155273437500e+03 -1.337500000000000000e+02 6.025000000000000000e+01
3.700000000000000000e+01 2.934615384615382823e+02 2.269622039794921875e+02 -5.188293457031250000e+00 5.032448172569274902e-01 0.000000000000000000e+00 8.779911499023437500e+02 6.740775704383850098e-01 3.000000000000000000e+00 1.203092529296875000e+03 -1.332500000000000000e+02 6.025000000000000000e+01
6.700000000000000000e+01 3.219923076923075200e+02 1.923164367675781250e+02 -5.584838867187500000e+00 4.764562547206878662e-01 0.000000000000000000e+00 8.552332153320312500e+02 1.074521780014038086e+00 4.000000000000000000e+00 1.121114624023437500e+03 -1.327500000000000000e+02 6.025000000000000000e+01
6.200000000000000000e+01 3.349461538461537771e+02 1.881395874023437500e+02 -6.030120849609375000e+00 2.996486425399780273e-01 0.000000000000000000e+00 8.224033813476562500e+02 6.291581988334655762e-01 4.000000000000000000e+00 1.110273071289062500e+03 -1.322500000000000000e+02 6.025000000000000000e+01
5.600000000000000000e+01 3.524846153846153243e+02 1.809016265869140625e+02 -6.475402832031250000e+00 4.366289079189300537e-01 0.000000000000000000e+00 7.895735473632812500e+02 6.252880692481994629e-01 4.000000000000000000e+00 1.272770019531250000e+03 -1.317500000000000000e+02 6.025000000000000000e+01
7.000000000000000000e+00 4.163384615384616723e+02 1.360330810546875000e+02 -7.038208007812500000e+00 6.398380994796752930e-01 0.000000000000000000e+00 7.803754882812500000e+02 6.787968277931213379e-01 1.000000000000000000e+00 1.513310180664062500e+03 -1.307500000000000000e+02 6.025000000000000000e+01
6.000000000000000000e+01 4.545153846153843347e+02 1.299301910400390625e+02 -7.155761718750000000e+00 4.393430948257446289e-01 0.000000000000000000e+00 8.040072631835937500e+02 1.001987218856811523e+00 4.000000000000000000e+00 1.126085815429687500e+03 -1.302500000000000000e+02 6.025000000000000000e+01
6.900000000000000000e+01 4.719923076923074632e+02 1.307267761230468750e+02 -7.273284912109375000e+00 1.510130316019058228e-01 2.352941185235977173e-01 8.276389770507812500e+02 1.618032693862915039e+00 4.000000000000000000e+00 7.496145019531250000e+02 -1.297500000000000000e+02 6.025000000000000000e+01
2.800000000000000000e+01 4.531230769230769511e+02 1.319774017333984375e+02 -7.336700439453125000e+00 1.481477618217468262e-01 5.294117927551269531e-01 8.514782104492187500e+02 1.679692029953002930e+00 3.000000000000000000e+00 6.546750488281250000e+02 -1.292500000000000000e+02 6.025000000000000000e+01
6.900000000000000000e+01 4.338307692307693060e+02 1.349095458984375000e+02 -7.237701416015625000e+00 2.719947695732116699e-01 2.941176593303680420e-01 8.759399414062500000e+02 1.615113019943237305e+00 4.000000000000000000e+00 9.507538452148437500e+02 -1.287500000000000000e+02 6.025000000000000000e+01
4.700000000000000000e+01 4.449692307692307054e+02 1.371544494628906250e+02 -7.138702392578125000e+00 1.198071837425231934e-01 5.882353186607360840e-01 9.004016723632812500e+02 1.574404954910278320e+00 4.000000000000000000e+00 6.550509033203125000e+02 -1.282500000000000000e+02 6.025000000000000000e+01
3.600000000000000000e+01 4.520153846153847326e+02 1.421320343017578125e+02 -7.039703369140625000e+00 2.563395202159881592e-01 0.000000000000000000e+00 9.248634033203125000e+02 8.492873907089233398e-01 3.000000000000000000e+00 1.024045043945312500e+03 -1.277500000000000000e+02 6.025000000000000000e+01
7.300000000000000000e+01 4.589384615384614108e+02 1.516148376464843750e+02 -6.805541992187500000e+00 3.399499952793121338e-01 2.941176593303680420e-01 9.678397827148437500e+02 1.511454463005065918e+00 4.000000000000000000e+00 1.083693481445312500e+03 -1.272500000000000000e+02 6.025000000000000000e+01
3.100000000000000000e+01 4.627846153846157904e+02 1.671158599853515625e+02 -6.436218261718750000e+00 2.082384079694747925e-01 6.470588445663452148e-01 1.029330810546875000e+03 1.643051862716674805e+00 3.000000000000000000e+00 9.014443359375000000e+02 -1.267500000000000000e+02 6.025000000000000000e+01
7.200000000000000000e+01 4.701384615384616836e+02 1.782230224609375000e+02 -6.066894531250000000e+00 2.511165440082550049e-01 5.882353186607360840e-01 1.090821777343750000e+03 1.457591056823730469e+00 4.000000000000000000e+00 8.720518798828125000e+02 -1.262500000000000000e+02 6.025000000000000000e+01
5.000000000000000000e+01 4.795999999999999659e+02 1.878860473632812500e+02 -5.697540283203125000e+00 2.655935287475585938e-01 1.176470637321472168e+00 1.152312744140625000e+03 7.691178321838378906e-01 4.000000000000000000e+00 9.840175170898437500e+02 -1.257500000000000000e+02 6.025000000000000000e+01
6.100000000000000000e+01 4.845230769230767010e+02 1.933146362304687500e+02 -5.299743652343750000e+00 9.999999776482582092e-03 0.000000000000000000e+00 1.235757446289062500e+03 1.356623768806457520e+00 4.000000000000000000e+00 6.037435302734375000e+02 -1.252500000000000000e+02 6.025000000000000000e+01
7.100000000000000000e+01 4.853846153846152447e+02 1.984050445556640625e+02 -4.892425537109375000e+00 3.093101382255554199e-01 2.941176593303680420e-01 1.326519897460937500e+03 9.790753126144409180e-01 4.000000000000000000e+00 9.801767578125000000e+02 -1.247500000000000000e+02 6.025000000000000000e+01
6.900000000000000000e+01 4.809923076923080316e+02 1.952597198486328125e+02 -4.485137939453125000e+00 9.999999776482582092e-03 1.176470592617988586e-01 1.417282470703125000e+03 7.150724530220031738e-01 4.000000000000000000e+00 6.688032226562500000e+02 -1.242500000000000000e+02 6.025000000000000000e+01
6.600000000000000000e+01 4.620230769230769852e+02 1.913872375488281250e+02 -4.077819824218750000e+00 9.999999776482582092e-03 5.882352963089942932e-02 1.508044921875000000e+03 7.619701623916625977e-01 4.000000000000000000e+00 3.639948120117187500e+02 -1.237500000000000000e+02 6.025000000000000000e+01
5.800000000000000000e+01 4.507461538461536747e+02 1.904681243896484375e+02 -3.833068847656250000e+00 9.999999776482582092e-03 0.000000000000000000e+00 1.581320678710937500e+03 7.839114665985107422e-01 4.000000000000000000e+00 3.034084777832031250e+02 -1.232500000000000000e+02 6.025000000000000000e+01
5.400000000000000000e+01 4.428538461538462343e+02 1.898816070556640625e+02 -3.588317871093750000e+00 9.999999776482582092e-03 0.000000000000000000e+00 1.654596313476562500e+03 8.908042311668395996e-01 4.000000000000000000e+00 3.313972167968750000e+02 -1.227500000000000000e+02 6.025000000000000000e+01
5.200000000000000000e+01 4.322076923076922981e+02 1.902206878662109375e+02 -3.343566894531250000e+00 1.344215869903564453e-01 0.000000000000000000e+00 1.727872070312500000e+03 1.419375538825988770e+00 4.000000000000000000e+00 4.414453735351562500e+02 -1.222500000000000000e+02 6.025000000000000000e+01
4.100000000000000000e+01 4.173076923076922640e+02 1.891906738281250000e+02 -3.153503417968750000e+00 1.433850377798080444e-01 5.294117927551269531e-01 1.793745483398437500e+03 1.492850542068481445e+00 3.000000000000000000e+00 4.683811950683593750e+02 -1.217500000000000000e+02 6.025000000000000000e+01
4.600000000000000000e+01 4.000692307692306713e+02 1.868583526611328125e+02 -3.127502441406250000e+00 2.695992887020111084e-01 0.000000000000000000e+00 1.837411987304687500e+03 1.487454533576965332e+00 4.000000000000000000e+00 6.491655883789062500e+02 -1.212500000000000000e+02 6.025000000000000000e+01
5.000000000000000000e+01 3.832923076923077588e+02 1.851810150146484375e+02 -3.101501464843750000e+00 2.452452182769775391e-01 5.882353186607360840e-01 1.881078491210937500e+03 1.803399324417114258e+00 4.000000000000000000e+00 6.103500976562500000e+02 -1.207500000000000000e+02 6.025000000000000000e+01
4.300000000000000000e+01 3.743538461538458364e+02 1.848955993652343750e+02 -3.075469970703125000e+00 3.164178431034088135e-01 7.058823704719543457e-01 1.924744995117187500e+03 1.806381821632385254e+00 3.000000000000000000e+00 6.796063232421875000e+02 -1.202500000000000000e+02 6.025000000000000000e+01
3.700000000000000000e+01 3.647999999999998977e+02 1.830907745361328125e+02 -3.124542236328125000e+00 1.642035990953445435e-01 7.647058963775634766e-01 1.952507324218750000e+03 1.546400666236877441e+00 3.000000000000000000e+00 4.224595031738281250e+02 -1.197500000000000000e+02 6.025000000000000000e+01
5.900000000000000000e+01 3.523923076923074973e+02 1.784710083007812500e+02 -3.248657226562500000e+00 2.152718901634216309e-01 0.000000000000000000e+00 1.964365722656250000e+03 7.358113527297973633e-01 4.000000000000000000e+00 4.904448852539062500e+02 -1.192500000000000000e+02 6.025000000000000000e+01
6.100000000000000000e+01 3.477076923076924118e+02 1.822230377197265625e+02 -3.372772216796875000e+00 2.384480088949203491e-01 0.000000000000000000e+00 1.976224121093750000e+03 1.059501886367797852e+00 4.000000000000000000e+00 4.916633911132812500e+02 -1.187500000000000000e+02 6.025000000000000000e+01
5.100000000000000000e+01 3.441307692307690900e+02 1.885498504638671875e+02 -3.496917724609375000e+00 2.328529357910156250e-01 0.000000000000000000e+00 1.988082397460937500e+03 7.378559112548828125e-01 4.000000000000000000e+00 4.433402404785156250e+02 -1.182500000000000000e+02 6.025000000000000000e+01
6.200000000000000000e+01 3.353538461538461206e+02 1.963191528320312500e+02 -3.618988037109375000e+00 3.838548958301544189e-01 2.941176593303680420e-01 1.988067382812500000e+03 1.230029344558715820e+00 4.000000000000000000e+00 6.095350952148437500e+02 -1.177500000000000000e+02 6.025000000000000000e+01
4.200000000000000000e+01 3.316307692307689194e+02 2.045082092285156250e+02 -3.740386962890625000e+00 5.203588008880615234e-01 0.000000000000000000e+00 1.984094482421875000e+03 1.782680034637451172e+00 3.000000000000000000e+00 7.841138916015625000e+02 -1.172500000000000000e+02 6.025000000000000000e+01
1.400000000000000000e+01 3.332000000000001023e+02 2.124376373291015625e+02 -3.861785888671875000e+00 1.919039636850357056e-01 0.000000000000000000e+00 1.980121704101562500e+03 1.834380507469177246e+00 1.000000000000000000e+00 2.521477355957031250e+02 -1.167500000000000000e+02 6.025000000000000000e+01
[truncated: 533,937 more chars]
