# Supplementary material for: Environmental Conditions for Alternative Tree Cover States in HighLatitudes
Source: Copernicus journal article supplement (doi:10.5194/bg-2016-401), 2016-10-11
Supplement: Supplementary file 4 [file bg-2016-401-supplement.zip › Analysis/files_to_load_and_import/boreal_na_west_database_canadianupdate_without_soiltexture.txt]

1.600000000000000000e+01 1.072330769230770102e+03 5.940416870117189774e+02 7.462402343750000000e+00 0.000000000000000000e+00 0.000000000000000000e+00 3.629697265625000000e+03 3.852497100830079901e+00 1.000000000000000000e+00 8.718759918212890625e+01 -1.232500000000000000e+02 4.525000000000000000e+01
5.900000000000000000e+01 1.630007692307689922e+03 6.344095458984379547e+02 5.780090332031250000e+00 0.000000000000000000e+00 0.000000000000000000e+00 3.546297119140619998e+03 2.548612356185909977e+00 4.000000000000000000e+00 3.625658569335939774e+02 -1.222500000000000000e+02 4.525000000000000000e+01
6.900000000000000000e+01 1.415107692307690058e+03 6.452888793945310226e+02 5.099151611328119671e+00 0.000000000000000000e+00 0.000000000000000000e+00 3.296928222656250000e+03 2.334721565246579811e+00 4.000000000000000000e+00 1.114204467773440001e+03 -1.217500000000000000e+02 4.525000000000000000e+01
8.000000000000000000e+00 7.647999999999999545e+02 4.475109863281250000e+02 4.898895263671880329e+00 0.000000000000000000e+00 2.941176593303679865e-01 3.270876464843750000e+03 3.080987930297849786e+00 1.000000000000000000e+00 5.736760253906250000e+02 -1.212500000000000000e+02 4.525000000000000000e+01
1.000000000000000000e+00 2.887692307692310010e+02 2.201305236816409945e+02 4.698638916015619671e+00 0.000000000000000000e+00 1.176470637321469948e+00 3.246973876953119998e+03 2.104991674423219994e+00 1.000000000000000000e+00 7.393183593750000000e+02 -1.207500000000000000e+02 4.525000000000000000e+01
1.000000000000000000e+00 2.769307692307689877e+02 2.014726867675780113e+02 4.498413085937500000e+00 0.000000000000000000e+00 5.882352963089940157e-02 3.225102294921880002e+03 2.125187397003169831e+00 1.000000000000000000e+00 9.002317504882810226e+02 -1.202500000000000000e+02 4.525000000000000000e+01
2.000000000000000000e+00 3.314461538461540044e+02 2.096279296875000000e+02 4.321197509765619671e+00 0.000000000000000000e+00 7.058823704719540126e-01 2.993604492187500000e+03 2.095083475112919924e+00 1.000000000000000000e+00 8.381884155273439774e+02 -1.197500000000000000e+02 4.525000000000000000e+01
4.000000000000000000e+00 3.886692307692309782e+02 2.766211853027339771e+02 4.166992187500000000e+00 0.000000000000000000e+00 1.176470592617989974e-01 2.973130615234380002e+03 2.905186176300050160e+00 1.000000000000000000e+00 1.234169799804690001e+03 -1.192500000000000000e+02 4.525000000000000000e+01
3.900000000000000000e+01 4.215846153846150060e+02 3.266361694335939774e+02 4.012817382812500000e+00 0.000000000000000000e+00 6.470588445663449928e-01 2.950628173828119998e+03 3.785861492156980201e+00 3.000000000000000000e+00 1.466727661132809999e+03 -1.187500000000000000e+02 4.525000000000000000e+01
2.500000000000000000e+01 4.177846153846149946e+02 3.727501831054689774e+02 3.858612060546879885e+00 0.000000000000000000e+00 2.352941185235979948e-01 2.927210449218750000e+03 3.365918636322020152e+00 3.000000000000000000e+00 1.223193481445309999e+03 -1.182500000000000000e+02 4.525000000000000000e+01
6.900000000000000000e+01 3.844076923076920025e+02 3.502135620117189774e+02 3.511199951171879885e+00 0.000000000000000000e+00 1.411764740943910024e+00 2.729595703125000000e+03 2.561030387878420189e+00 4.000000000000000000e+00 1.351202270507809999e+03 -1.177500000000000000e+02 4.525000000000000000e+01
2.100000000000000000e+01 5.797384615384610242e+02 4.371640014648439774e+02 2.687561035156250000e+00 0.000000000000000000e+00 3.529411852359770063e-01 2.664777832031250000e+03 2.532134294509889916e+00 3.000000000000000000e+00 1.321743652343750000e+03 -1.167500000000000000e+02 4.525000000000000000e+01
5.900000000000000000e+01 2.790461538461540272e+02 2.644379272460939774e+02 5.706787109375000000e-02 0.000000000000000000e+00 1.235294103622440076e+00 2.321963134765619998e+03 2.058600902557369938e+00 4.000000000000000000e+00 1.889574462890619998e+03 -1.142500000000000000e+02 4.525000000000000000e+01
2.000000000000000000e+00 2.636846153846149718e+02 2.496418304443359943e+02 -1.014129638671880107e+00 0.000000000000000000e+00 5.882352963089940157e-02 2.321606933593750000e+03 2.255477905273440165e+00 1.000000000000000000e+00 1.697906250000000000e+03 -1.127500000000000000e+02 4.525000000000000000e+01
1.000000000000000000e+01 4.900538461538459956e+02 3.588441162109380116e+02 -8.994140625000000000e-01 0.000000000000000000e+00 0.000000000000000000e+00 2.441755371093750000e+03 2.279029846191409803e+00 1.000000000000000000e+00 1.595843017578119998e+03 -1.117500000000000000e+02 4.525000000000000000e+01
2.000000000000000000e+00 3.494615384615390212e+02 1.580881347656250000e+02 2.164520263671879885e+00 0.000000000000000000e+00 2.352941185235979948e-01 2.857673095703119998e+03 3.158253669738769975e+00 1.000000000000000000e+00 1.455533325195309999e+03 -1.087500000000000000e+02 4.525000000000000000e+01
1.000000000000000000e+00 3.278923076923080089e+02 1.673427429199219887e+02 2.717163085937500000e+00 0.000000000000000000e+00 2.941176593303679865e-01 3.093960693359380002e+03 2.970858335495000002e+00 1.000000000000000000e+00 1.411353637695309999e+03 -1.082500000000000000e+02 4.525000000000000000e+01
2.000000000000000000e+00 3.179461538461540044e+02 2.604367980957030113e+02 3.269805908203120115e+00 0.000000000000000000e+00 1.058823585510249909e+00 3.126695312500000000e+03 3.729613780975340021e+00 1.000000000000000000e+00 1.127680297851559999e+03 -1.077500000000000000e+02 4.525000000000000000e+01
7.000000000000000000e+00 3.306153846153849827e+02 2.340709991455080115e+02 3.822448730468750000e+00 0.000000000000000000e+00 3.529411852359770063e-01 3.156721435546880002e+03 3.804862022399900123e+00 1.000000000000000000e+00 1.180484619140619998e+03 -1.072500000000000000e+02 4.525000000000000000e+01
3.000000000000000000e+00 3.433000000000000114e+02 1.785722351074219887e+02 4.288085937500000000e+00 0.000000000000000000e+00 5.882353186607359730e-01 3.312505371093750000e+03 3.800651788711550072e+00 1.000000000000000000e+00 1.152386230468750000e+03 -1.067500000000000000e+02 4.525000000000000000e+01
1.600000000000000000e+01 3.583076923076919797e+02 1.600307006835940058e+02 4.492614746093750000e+00 0.000000000000000000e+00 7.647058963775630325e-01 3.323978027343750000e+03 3.861819505691530097e+00 1.000000000000000000e+00 1.191721679687500000e+03 -1.062500000000000000e+02 4.525000000000000000e+01
1.000000000000000000e+00 3.774307692307689877e+02 1.592143249511719887e+02 4.697143554687500000e+00 0.000000000000000000e+00 9.411764740943909802e-01 3.332845703125000000e+03 3.187011957168579990e+00 1.000000000000000000e+00 1.080758544921880002e+03 -1.057500000000000000e+02 4.525000000000000000e+01
2.000000000000000000e+00 3.754692307692309896e+02 1.757071228027340055e+02 4.901702880859380329e+00 0.000000000000000000e+00 5.882352963089940157e-02 3.339061767578119998e+03 3.389971971511839932e+00 1.000000000000000000e+00 1.011227966308589998e+03 -1.052500000000000000e+02 4.525000000000000000e+01
1.000000000000000000e+00 3.705153846153850168e+02 1.847846984863280113e+02 5.002197265625000000e+00 0.000000000000000000e+00 0.000000000000000000e+00 3.384424072265619998e+03 3.893035411834719905e+00 1.000000000000000000e+00 1.130598266601559999e+03 -1.047500000000000000e+02 4.525000000000000000e+01
1.000000000000000000e+00 3.436384615384610015e+02 1.859476318359380116e+02 4.998626708984380329e+00 0.000000000000000000e+00 3.529411852359770063e-01 3.379717285156250000e+03 2.984688520431519887e+00 1.000000000000000000e+00 1.007493957519529999e+03 -1.042500000000000000e+02 4.525000000000000000e+01
1.000000000000000000e+00 3.358307692307690218e+02 1.819719848632809942e+02 4.995056152343750000e+00 0.000000000000000000e+00 5.294117927551269531e-01 3.374271728515619998e+03 2.137615919113160068e+00 1.000000000000000000e+00 9.537901000976560226e+02 -1.037500000000000000e+02 4.525000000000000000e+01
4.000000000000000000e+00 3.575076923076920252e+02 1.875175018310550001e+02 4.991516113281250000e+00 0.000000000000000000e+00 0.000000000000000000e+00 3.368844970703119998e+03 3.896698951721190074e+00 1.000000000000000000e+00 9.135078735351560226e+02 -1.032500000000000000e+02 4.525000000000000000e+01
2.000000000000000000e+00 3.768769230769229921e+02 1.973517608642580115e+02 4.920318603515619671e+00 0.000000000000000000e+00 0.000000000000000000e+00 3.356035644531250000e+03 3.908400535583500091e+00 1.000000000000000000e+00 8.618062744140620453e+02 -1.027500000000000000e+02 4.525000000000000000e+01
6.000000000000000000e+00 4.099461538461540044e+02 2.086399230957030113e+02 4.826568603515619671e+00 0.000000000000000000e+00 6.470588445663449928e-01 3.352270507812500000e+03 3.937194108963010031e+00 1.000000000000000000e+00 7.301537475585939774e+02 -1.022500000000000000e+02 4.525000000000000000e+01
4.000000000000000000e+00 4.361153846153849827e+02 2.113619079589840055e+02 4.732818603515619671e+00 0.000000000000000000e+00 0.000000000000000000e+00 3.349326660156250000e+03 3.952824354171749821e+00 1.000000000000000000e+00 6.726934814453120453e+02 -1.017500000000000000e+02 4.525000000000000000e+01
6.000000000000000000e+00 4.483615384615389985e+02 2.180666046142580115e+02 4.639068603515619671e+00 0.000000000000000000e+00 5.294117927551269531e-01 3.347441162109380002e+03 3.959222555160519796e+00 1.000000000000000000e+00 6.652499389648439774e+02 -1.012500000000000000e+02 4.525000000000000000e+01
9.000000000000000000e+00 4.362153846153850054e+02 2.108714904785159945e+02 4.645599365234380329e+00 0.000000000000000000e+00 0.000000000000000000e+00 3.332659667968750000e+03 3.985782861709589842e+00 1.000000000000000000e+00 5.606432495117189774e+02 -1.007500000000000000e+02 4.525000000000000000e+01
6.700000000000000000e+01 1.720230769230769965e+03 6.565642700195310226e+02 8.455932617187500000e+00 0.000000000000000000e+00 0.000000000000000000e+00 3.694218994140619998e+03 2.578819274902340197e+00 4.000000000000000000e+00 2.294776000976559942e+02 -1.237500000000000000e+02 4.575000000000000000e+01
6.500000000000000000e+01 1.574192307692309896e+03 6.260153198242189774e+02 7.688110351562500000e+00 0.000000000000000000e+00 0.000000000000000000e+00 3.638853027343750000e+03 2.579348564147950107e+00 4.000000000000000000e+00 2.998395080566410229e+02 -1.232500000000000000e+02 4.575000000000000000e+01
1.300000000000000000e+01 1.121107692307690058e+03 5.694894409179689774e+02 6.920288085937500000e+00 0.000000000000000000e+00 0.000000000000000000e+00 3.576416503906250000e+03 1.772955894470209959e+00 1.000000000000000000e+00 3.565056610107419743e+01 -1.227500000000000000e+02 4.575000000000000000e+01
6.700000000000000000e+01 2.000984615384619929e+03 6.294533081054689774e+02 6.152465820312500000e+00 0.000000000000000000e+00 0.000000000000000000e+00 3.517161376953119998e+03 2.599434137344359907e+00 4.000000000000000000e+00 6.608956298828120453e+02 -1.222500000000000000e+02 4.575000000000000000e+01
7.600000000000000000e+01 1.830961538461539931e+03 6.320665893554689774e+02 5.528442382812500000e+00 0.000000000000000000e+00 0.000000000000000000e+00 3.294937988281250000e+03 2.439605236053469905e+00 4.000000000000000000e+00 4.549206848144530113e+02 -1.217500000000000000e+02 4.575000000000000000e+01
4.800000000000000000e+01 8.912692307692309441e+02 4.483576049804689774e+02 5.335906982421880329e+00 0.000000000000000000e+00 2.941176593303679865e-01 3.264122802734380002e+03 3.120883703231810191e+00 4.000000000000000000e+00 3.501225280761719887e+02 -1.212500000000000000e+02 4.575000000000000000e+01
4.000000000000000000e+00 3.453615384615379753e+02 2.396151733398440058e+02 5.143341064453119671e+00 0.000000000000000000e+00 2.941176593303679865e-01 3.235673583984380002e+03 4.032940387725830078e+00 1.000000000000000000e+00 7.079478149414060226e+02 -1.207500000000000000e+02 4.575000000000000000e+01
4.000000000000000000e+00 2.191999999999999886e+02 1.849193878173830115e+02 4.950805664062500000e+00 0.000000000000000000e+00 8.235294222831730515e-01 3.209546142578119998e+03 3.538486003875730201e+00 1.000000000000000000e+00 2.746874694824219887e+02 -1.202500000000000000e+02 4.575000000000000000e+01
7.000000000000000000e+00 1.959461538461540044e+02 1.452718963623050001e+02 4.761291503906250000e+00 0.000000000000000000e+00 1.588235259056089976e+00 3.010949707031250000e+03 4.000669479370119852e+00 1.000000000000000000e+00 1.743455505371090055e+02 -1.197500000000000000e+02 4.575000000000000000e+01
2.000000000000000000e+00 3.516000000000000227e+02 2.416390838623050001e+02 4.388336181640619671e+00 0.000000000000000000e+00 2.411764621734620029e+00 2.953054199218750000e+03 4.185682773590089667e+00 1.000000000000000000e+00 4.907540283203119884e+02 -1.187500000000000000e+02 4.575000000000000000e+01
5.500000000000000000e+01 4.853615384615379753e+02 4.232775878906250000e+02 4.201843261718750000e+00 0.000000000000000000e+00 1.470588207244869938e+00 2.922914550781250000e+03 3.449283838272089842e+00 4.000000000000000000e+00 9.370731201171879547e+02 -1.182500000000000000e+02 4.575000000000000000e+01
4.000000000000000000e+01 4.572384615384619906e+02 4.432369079589839771e+02 3.828735351562500000e+00 0.000000000000000000e+00 2.352941185235979948e-01 2.746780273437500000e+03 2.592496395111079988e+00 3.000000000000000000e+00 1.186978515625000000e+03 -1.177500000000000000e+02 4.575000000000000000e+01
2.700000000000000000e+01 5.019153846153849940e+02 3.208512878417969887e+02 3.393432617187500000e+00 0.000000000000000000e+00 2.941176593303679865e-01 2.702407226562500000e+03 3.113029003143310103e+00 3.000000000000000000e+00 1.358203735351559999e+03 -1.172500000000000000e+02 4.575000000000000000e+01
3.000000000000000000e+00 5.587307692307690559e+02 2.596292114257810226e+02 2.958129882812500000e+00 0.000000000000000000e+00 1.411764740943910024e+00 2.656466552734380002e+03 3.846575975418089932e+00 1.000000000000000000e+00 6.481063842773439774e+02 -1.167500000000000000e+02 4.575000000000000000e+01
3.000000000000000000e+01 6.309769230769229580e+02 3.418236083984380116e+02 2.522827148437500000e+00 0.000000000000000000e+00 1.411764740943910024e+00 2.615168945312500000e+03 2.799054622650150037e+00 3.000000000000000000e+00 8.662194213867189774e+02 -1.162500000000000000e+02 4.575000000000000000e+01
7.100000000000000000e+01 6.121307692307690331e+02 4.860449523925780113e+02 1.968750000000000000e+00 0.000000000000000000e+00 5.294117927551269531e-01 2.453523681640619998e+03 2.225625276565549981e+00 4.000000000000000000e+00 1.583796630859380002e+03 -1.157500000000000000e+02 4.575000000000000000e+01
4.800000000000000000e+01 4.993769230769229921e+02 5.220376586914060226e+02 1.414642333984380107e+00 0.000000000000000000e+00 7.647058963775630325e-01 2.415488769531250000e+03 2.143804311752319780e+00 4.000000000000000000e+00 1.668857910156250000e+03 -1.152500000000000000e+02 4.575000000000000000e+01
5.000000000000000000e+01 3.900153846153850168e+02 4.862987060546880116e+02 8.605651855468750000e-01 0.000000000000000000e+00 8.235294222831730515e-01 2.380380371093750000e+03 2.094846487045289862e+00 4.000000000000000000e+00 1.450809570312500000e+03 -1.147500000000000000e+02 4.575000000000000000e+01
5.700000000000000000e+01 3.077461538461540158e+02 4.041720581054689774e+02 3.769836425781250000e-01 0.000000000000000000e+00 8.823529481887819603e-01 2.305343017578119998e+03 2.070805311202999821e+00 4.000000000000000000e+00 1.879067504882809999e+03 -1.142500000000000000e+02 4.575000000000000000e+01
2.000000000000000000e+00 3.325384615384620020e+02 2.915611267089839771e+02 -4.389648437500000000e-01 0.000000000000000000e+00 0.000000000000000000e+00 2.305875000000000000e+03 2.775451898574829990e+00 1.000000000000000000e+00 1.765903076171880002e+03 -1.127500000000000000e+02 4.575000000000000000e+01
1.000000000000000000e+00 3.358153846153850282e+02 2.747515869140619884e+02 -4.494934082031250000e-01 0.000000000000000000e+00 1.176470592617989974e-01 2.390547851562500000e+03 3.327259063720700016e+00 1.000000000000000000e+00 1.440894287109380002e+03 -1.122500000000000000e+02 4.575000000000000000e+01
5.000000000000000000e+00 4.007923076923079861e+02 2.401125793457030113e+02 -1.985778808593750000e-01 0.000000000000000000e+00 5.882352963089940157e-02 2.425444824218750000e+03 3.542737483978270152e+00 1.000000000000000000e+00 1.478331298828119998e+03 -1.117500000000000000e+02 4.575000000000000000e+01
4.000000000000000000e+00 4.265923076923079975e+02 3.066191406250000000e+02 8.500366210937500000e-01 0.000000000000000000e+00 2.352941185235979948e-01 2.715644531250000000e+03 3.295426130294799805e+00 1.000000000000000000e+00 1.373283325195309999e+03 -1.102500000000000000e+02 4.575000000000000000e+01
8.000000000000000000e+00 4.145307692307690104e+02 2.850620422363280113e+02 1.495391845703119893e+00 0.000000000000000000e+00 8.235294222831730515e-01 2.772695068359380002e+03 3.639435291290280095e+00 1.000000000000000000e+00 1.224311767578119998e+03 -1.097500000000000000e+02 4.575000000000000000e+01
1.000000000000000000e+00 3.925692307692310123e+02 1.881030731201169885e+02 2.140777587890620115e+00 0.000000000000000000e+00 0.000000000000000000e+00 2.831284667968750000e+03 3.804097414016720080e+00 1.000000000000000000e+00 1.337957031250000000e+03 -1.092500000000000000e+02 4.575000000000000000e+01
1.000000000000000000e+00 3.547923076923079861e+02 1.646867370605469887e+02 2.786132812500000000e+00 0.000000000000000000e+00 4.705882370471949905e-01 2.882978515625000000e+03 3.807306289672849786e+00 1.000000000000000000e+00 1.067005859375000000e+03 -1.087500000000000000e+02 4.575000000000000000e+01
9.000000000000000000e+00 3.448692307692310237e+02 1.754175415039059942e+02 3.255493164062500000e+00 0.000000000000000000e+00 4.705882370471949905e-01 3.094248291015619998e+03 3.852518081665039951e+00 1.000000000000000000e+00 1.097494506835940001e+03 -1.082500000000000000e+02 4.575000000000000000e+01
1.000000000000000000e+00 3.479153846153849940e+02 1.940204772949219887e+02 3.724853515625000000e+00 0.000000000000000000e+00 7.647058963775630325e-01 3.139726562500000000e+03 3.889575004577639827e+00 1.000000000000000000e+00 9.481448364257810226e+02 -1.077500000000000000e+02 4.575000000000000000e+01
1.000000000000000000e+01 3.551615384615390099e+02 1.893991699218750000e+02 4.194183349609380329e+00 0.000000000000000000e+00 4.117647111415860262e-01 3.181958984375000000e+03 3.840264797210689807e+00 1.000000000000000000e+00 1.007221496582029999e+03 -1.072500000000000000e+02 4.575000000000000000e+01
4.000000000000000000e+00 3.485923076923079975e+02 1.850218200683590055e+02 4.571929931640619671e+00 0.000000000000000000e+00 7.058823704719540126e-01 3.321152099609380002e+03 3.835369586944580078e+00 1.000000000000000000e+00 1.028546142578119998e+03 -1.067500000000000000e+02 4.575000000000000000e+01
7.000000000000000000e+00 3.444384615384619792e+02 1.671529388427730112e+02 4.674865722656250000e+00 0.000000000000000000e+00 4.117647111415860262e-01 3.334927978515619998e+03 3.918171405792239881e+00 1.000000000000000000e+00 9.061692504882810226e+02 -1.062500000000000000e+02 4.575000000000000000e+01
3.000000000000000000e+00 3.710384615384620020e+02 1.650004425048830115e+02 4.777801513671880329e+00 0.000000000000000000e+00 5.294117927551269531e-01 3.345771728515619998e+03 3.935112714767460051e+00 1.000000000000000000e+00 9.489454345703120453e+02 -1.057500000000000000e+02 4.575000000000000000e+01
6.000000000000000000e+00 3.980000000000000000e+02 1.724779815673830115e+02 4.880737304687500000e+00 0.000000000000000000e+00 0.000000000000000000e+00 3.353698242187500000e+03 3.081095695495609910e+00 1.000000000000000000e+00 9.489465332031250000e+02 -1.052500000000000000e+02 4.575000000000000000e+01
4.000000000000000000e+00 4.082153846153850054e+02 1.844602355957030113e+02 4.890838623046880329e+00 0.000000000000000000e+00 1.176470637321469948e+00 3.390621337890619998e+03 3.622791767120359996e+00 1.000000000000000000e+00 9.938185424804689774e+02 -1.047500000000000000e+02 4.575000000000000000e+01
8.000000000000000000e+00 3.802076923076920139e+02 1.867716369628909945e+02 4.808135986328119671e+00 0.000000000000000000e+00 5.882353186607359730e-01 3.383101074218750000e+03 3.726618289947510210e+00 1.000000000000000000e+00 1.041074218750000000e+03 -1.042500000000000000e+02 4.575000000000000000e+01
5.000000000000000000e+00 3.630076923076920252e+02 1.740420074462890057e+02 4.725433349609380329e+00 0.000000000000000000e+00 0.000000000000000000e+00 3.374221923828119998e+03 3.831869363784790039e+00 1.000000000000000000e+00 9.661566772460939774e+02 -1.037500000000000000e+02 4.575000000000000000e+01
8.000000000000000000e+00 3.586769230769230035e+02 1.767017974853519888e+02 4.642730712890619671e+00 0.000000000000000000e+00 0.000000000000000000e+00 3.366237060546880002e+03 3.833910703659059838e+00 1.000000000000000000e+00 9.048753662109379547e+02 -1.032500000000000000e+02 4.575000000000000000e+01
3.000000000000000000e+00 3.681923076923080203e+02 1.932738800048830115e+02 4.551025390625000000e+00 0.000000000000000000e+00 2.352941185235979948e-01 3.353441406250000000e+03 3.839887619018549803e+00 1.000000000000000000e+00 8.481588745117189774e+02 -1.027500000000000000e+02 4.575000000000000000e+01
5.000000000000000000e+00 4.194692307692309896e+02 2.152783508300780113e+02 4.361602783203119671e+00 0.000000000000000000e+00 3.529411852359770063e-01 3.344212890625000000e+03 3.876293420791629973e+00 1.000000000000000000e+00 6.848190307617189774e+02 -1.017500000000000000e+02 4.575000000000000000e+01
7.000000000000000000e+00 4.364384615384610129e+02 2.185375518798830115e+02 4.266876220703119671e+00 0.000000000000000000e+00 4.705882370471949905e-01 3.341753173828119998e+03 3.881774663925170010e+00 1.000000000000000000e+00 5.961851196289060226e+02 -1.012500000000000000e+02 4.575000000000000000e+01
1.000000000000000000e+00 4.345000000000000000e+02 2.166190338134769888e+02 4.294616699218750000e+00 0.000000000000000000e+00 8.235294222831730515e-01 3.330469238281250000e+03 3.910494089126590023e+00 1.000000000000000000e+00 6.131783447265620453e+02 -1.007500000000000000e+02 4.575000000000000000e+01
3.000000000000000000e+00 4.630076923076920252e+02 2.060798339843750000e+02 4.322357177734380329e+00 0.000000000000000000e+00 8.235294222831730515e-01 3.333533691406250000e+03 3.887287378311159891e+00 1.000000000000000000e+00 5.866370849609379547e+02 -1.002500000000000000e+02 4.575000000000000000e+01
5.700000000000000000e+01 1.592807692307690104e+03 6.149839477539060226e+02 7.913818359375000000e+00 0.000000000000000000e+00 5.882352963089940157e-02 3.664464599609380002e+03 2.589055538177489790e+00 4.000000000000000000e+00 2.841430358886719887e+02 -1.232500000000000000e+02 4.625000000000000000e+01
6.100000000000000000e+01 1.493761538461540113e+03 5.947539672851560226e+02 7.219329833984380329e+00 0.000000000000000000e+00 0.000000000000000000e+00 3.560503906250000000e+03 2.586648941040039951e+00 4.000000000000000000e+00 2.810413208007810226e+02 -1.227500000000000000e+02 4.625000000000000000e+01
1.100000000000000000e+01 2.116646153846149900e+03 6.609738769531250000e+02 6.524841308593750000e+00 0.000000000000000000e+00 0.000000000000000000e+00 3.273321289062500000e+03 2.353681564331049803e+00 1.000000000000000000e+00 9.669095458984379547e+02 -1.222500000000000000e+02 4.625000000000000000e+01
7.600000000000000000e+01 1.858407692307690013e+03 6.586012573242189774e+02 5.957763671875000000e+00 0.000000000000000000e+00 2.352941185235979948e-01 3.237469238281250000e+03 2.239668369293209782e+00 4.000000000000000000e+00 1.206273193359380002e+03 -1.217500000000000000e+02 4.625000000000000000e+01
4.500000000000000000e+01 1.127738461538459887e+03 5.674865722656250000e+02 5.772918701171880329e+00 0.000000000000000000e+00 4.705882370471949905e-01 3.253563476562500000e+03 2.276426315307619852e+00 4.000000000000000000e+00 1.091559570312500000e+03 -1.212500000000000000e+02 4.625000000000000000e+01
6.000000000000000000e+00 3.761153846153849827e+02 3.513985290527339771e+02 5.588043212890619671e+00 0.000000000000000000e+00 0.000000000000000000e+00 3.220743408203119998e+03 2.805913925170900214e+00 1.000000000000000000e+00 8.770693359375000000e+02 -1.207500000000000000e+02 4.625000000000000000e+01
6.000000000000000000e+00 1.989538461538460012e+02 1.777115783691409945e+02 5.403198242187500000e+00 0.000000000000000000e+00 5.294117927551269531e-01 3.048005126953119998e+03 3.399662494659419831e+00 1.000000000000000000e+00 2.662948608398439774e+02 -1.202500000000000000e+02 4.625000000000000000e+01
5.000000000000000000e+00 2.775000000000000000e+02 1.520032196044919885e+02 4.763854980468750000e+00 0.000000000000000000e+00 1.294117689132689986e+00 2.953810058593750000e+03 4.500523567199709696e+00 1.000000000000000000e+00 2.853581237792969887e+02 -1.187500000000000000e+02 4.625000000000000000e+01
3.000000000000000000e+00 4.764307692307689877e+02 2.875387268066410229e+02 4.545074462890619671e+00 0.000000000000000000e+00 1.352941155433649900e+00 2.828760986328119998e+03 4.333793640136719638e+00 1.000000000000000000e+00 4.090560607910160229e+02 -1.182500000000000000e+02 4.625000000000000000e+01
5.600000000000000000e+01 5.062923076923079861e+02 4.263088989257810226e+02 4.146301269531250000e+00 0.000000000000000000e+00 2.941176414489750091e+00 2.794702148437500000e+03 3.190964698791499909e+00 4.000000000000000000e+00 1.194411621093750000e+03 -1.177500000000000000e+02 4.625000000000000000e+01
2.000000000000000000e+00 4.600384615384620020e+02 3.309536132812500000e+02 3.687500000000000000e+00 0.000000000000000000e+00 1.117647051811220038e+00 2.709930175781250000e+03 4.105258941650389737e+00 1.000000000000000000e+00 8.644212646484379547e+02 -1.172500000000000000e+02 4.625000000000000000e+01
4.500000000000000000e+01 5.427615384615389758e+02 2.852466735839839771e+02 3.228698730468750000e+00 0.000000000000000000e+00 1.529411792755130062e+00 2.637511718750000000e+03 4.135430335998539597e+00 4.000000000000000000e+00 1.109067382812500000e+03 -1.167500000000000000e+02 4.625000000000000000e+01
7.300000000000000000e+01 6.738153846153850282e+02 5.489719238281250000e+02 2.229583740234379885e+00 0.000000000000000000e+00 7.058823704719540126e-01 2.459031250000000000e+03 2.447913408279419833e+00 4.000000000000000000e+00 1.079751220703119998e+03 -1.157500000000000000e+02 4.625000000000000000e+01
3.600000000000000000e+01 5.701769230769230035e+02 6.070809326171879547e+02 1.689239501953119893e+00 0.000000000000000000e+00 0.000000000000000000e+00 2.399264892578119998e+03 2.239348888397219905e+00 3.000000000000000000e+00 1.605747924804690001e+03 -1.152500000000000000e+02 4.625000000000000000e+01
5.900000000000000000e+01 4.390846153846150060e+02 5.594276733398439774e+02 1.148895263671880107e+00 0.000000000000000000e+00 1.058823585510249909e+00 2.257133056640619998e+03 2.123803138732910156e+00 4.000000000000000000e+00 1.598050781250000000e+03 -1.147500000000000000e+02 4.625000000000000000e+01
3.400000000000000000e+01 3.381846153846149718e+02 3.610710144042969887e+02 6.969299316406250000e-01 0.000000000000000000e+00 1.235294103622440076e+00 2.236266113281250000e+03 2.248974323272709963e+00 3.000000000000000000e+00 1.719233398437500000e+03 -1.142500000000000000e+02 4.625000000000000000e+01
2.100000000000000000e+01 3.464461538461540044e+02 2.642116088867189774e+02 1.959228515625000000e-01 0.000000000000000000e+00 0.000000000000000000e+00 2.282514892578119998e+03 2.290971994400019973e+00 3.000000000000000000e+00 1.992111083984380002e+03 -1.122500000000000000e+02 4.625000000000000000e+01
2.600000000000000000e+01 3.734769230769230148e+02 1.851010437011719887e+02 5.022583007812500000e-01 0.000000000000000000e+00 0.000000000000000000e+00 2.400446044921880002e+03 3.422381877899169922e+00 3.000000000000000000e+00 1.866824218750000000e+03 -1.117500000000000000e+02 4.625000000000000000e+01
3.100000000000000000e+01 4.227153846153839822e+02 2.638283996582030113e+02 8.085937500000000000e-01 0.000000000000000000e+00 4.117647111415860262e-01 2.462385009765619998e+03 3.113366603851320136e+00 3.000000000000000000e+00 1.730005981445309999e+03 -1.112500000000000000e+02 4.625000000000000000e+01
5.000000000000000000e+00 4.044384615384619792e+02 3.569676208496089771e+02 1.114929199218750000e+00 0.000000000000000000e+00 2.941176593303679865e-01 2.578066162109380002e+03 1.294380784034729892e+00 1.000000000000000000e+00 1.678035400390619998e+03 -1.107500000000000000e+02 4.625000000000000000e+01
3.000000000000000000e+00 3.889769230769230148e+02 2.234486236572269888e+02 2.225769042968750000e+00 0.000000000000000000e+00 0.000000000000000000e+00 2.766115478515619998e+03 3.675563573837279829e+00 1.000000000000000000e+00 1.364005371093750000e+03 -1.097500000000000000e+02 4.625000000000000000e+01
9.000000000000000000e+00 3.756153846153840163e+02 1.694148254394530113e+02 2.816772460937500000e+00 0.000000000000000000e+00 3.529411852359770063e-01 2.859956054687500000e+03 3.778988361358639914e+00 1.000000000000000000e+00 1.169747436523440001e+03 -1.092500000000000000e+02 4.625000000000000000e+01
1.500000000000000000e+01 3.593999999999999773e+02 1.602797851562500000e+02 3.407775878906250000e+00 0.000000000000000000e+00 2.941176593303679865e-01 3.022306396484380002e+03 3.732925653457639825e+00 1.000000000000000000e+00 1.101031127929690001e+03 -1.087500000000000000e+02 4.625000000000000000e+01
1.000000000000000000e+00 3.557307692307689990e+02 1.737257843017580115e+02 3.793823242187500000e+00 0.000000000000000000e+00 8.823529481887819603e-01 3.088929931640619998e+03 3.362066507339480204e+00 1.000000000000000000e+00 1.169681518554690001e+03 -1.082500000000000000e+02 4.625000000000000000e+01
1.000000000000000000e+00 3.464076923076920025e+02 1.864553985595699999e+02 4.179870605468750000e+00 0.000000000000000000e+00 3.529411852359770063e-01 3.157908691406250000e+03 3.595371484756470171e+00 1.000000000000000000e+00 9.332085571289060226e+02 -1.077500000000000000e+02 4.625000000000000000e+01
3.000000000000000000e+00 3.453692307692310237e+02 1.816357116699219887e+02 4.565917968750000000e+00 0.000000000000000000e+00 2.352941185235979948e-01 3.311903076171880002e+03 3.640416860580439895e+00 1.000000000000000000e+00 8.737061157226560226e+02 -1.072500000000000000e+02 4.625000000000000000e+01
4.000000000000000000e+00 3.375692307692310123e+02 1.757928314208980112e+02 4.855773925781250000e+00 0.000000000000000000e+00 6.470588445663449928e-01 3.337521728515619998e+03 3.388258218765260121e+00 1.000000000000000000e+00 8.193965454101560226e+02 -1.067500000000000000e+02 4.625000000000000000e+01
6.000000000000000000e+00 3.325230769230769852e+02 1.618824615478519888e+02 4.857116699218750000e+00 0.000000000000000000e+00 2.941176593303679865e-01 3.350638183593750000e+03 3.630081892013549805e+00 1.000000000000000000e+00 7.896652832031250000e+02 -1.062500000000000000e+02 4.625000000000000000e+01
5.000000000000000000e+00 3.541153846153849827e+02 1.478033142089840055e+02 4.858428955078119671e+00 0.000000000000000000e+00 0.000000000000000000e+00 3.363230224609380002e+03 3.645079851150510031e+00 1.000000000000000000e+00 7.635844726562500000e+02 -1.057500000000000000e+02 4.625000000000000000e+01
1.000000000000000000e+00 4.167846153846149946e+02 1.584257507324219887e+02 4.859771728515619671e+00 0.000000000000000000e+00 0.000000000000000000e+00 3.387496093750000000e+03 3.924557685852049893e+00 1.000000000000000000e+00 7.896727905273439774e+02 -1.052500000000000000e+02 4.625000000000000000e+01
2.000000000000000000e+00 4.435076923076920252e+02 1.689656524658199999e+02 4.779510498046880329e+00 0.000000000000000000e+00 0.000000000000000000e+00 3.384722900390619998e+03 3.900996208190920189e+00 1.000000000000000000e+00 8.700382690429689774e+02 -1.047500000000000000e+02 4.625000000000000000e+01
1.000000000000000000e+00 4.167153846153850054e+02 1.802449645996090055e+02 4.617675781250000000e+00 0.000000000000000000e+00 0.000000000000000000e+00 3.389002685546880002e+03 3.855303287506099963e+00 1.000000000000000000e+00 9.600771484375000000e+02 -1.042500000000000000e+02 4.625000000000000000e+01
1.000000000000000000e+00 3.756461538461539931e+02 1.798527984619140057e+02 4.455810546875000000e+00 0.000000000000000000e+00 1.176470592617989974e-01 3.372072021484380002e+03 3.820609331130980113e+00 1.000000000000000000e+00 9.178685302734379547e+02 -1.037500000000000000e+02 4.625000000000000000e+01
0.000000000000000000e+00 3.664615384615379980e+02 1.761825256347659945e+02 4.293975830078119671e+00 0.000000000000000000e+00 2.941176593303679865e-01 3.315554443359380002e+03 3.805453062057500002e+00 1.000000000000000000e+00 8.784367675781250000e+02 -1.032500000000000000e+02 4.625000000000000000e+01
6.000000000000000000e+00 3.619846153846149832e+02 1.853360443115230112e+02 4.181762695312500000e+00 0.000000000000000000e+00 6.470588445663449928e-01 3.307794677734380002e+03 3.789425373077389914e+00 1.000000000000000000e+00 8.005103759765620453e+02 -1.027500000000000000e+02 4.625000000000000000e+01
4.000000000000000000e+00 3.969153846153849940e+02 1.899311676025390057e+02 3.990386962890620115e+00 0.000000000000000000e+00 0.000000000000000000e+00 3.335589111328119998e+03 3.817467212677000177e+00 1.000000000000000000e+00 6.955894165039060226e+02 -1.017500000000000000e+02 4.625000000000000000e+01
7.000000000000000000e+00 4.189538461538459728e+02 2.021135864257809942e+02 3.894683837890620115e+00 0.000000000000000000e+00 0.000000000000000000e+00 3.282765380859380002e+03 3.812354564666749823e+00 1.000000000000000000e+00 6.290775146484379547e+02 -1.012500000000000000e+02 4.625000000000000000e+01
5.000000000000000000e+00 4.527461538461540158e+02 2.097980041503909945e+02 3.943634033203120115e+00 0.000000000000000000e+00 2.352941185235979948e-01 3.325674804687500000e+03 3.792600870132449842e+00 1.000000000000000000e+00 5.415242919921879547e+02 -1.007500000000000000e+02 4.625000000000000000e+01
4.000000000000000000e+00 4.553461538461539817e+02 2.191775512695309942e+02 3.992553710937500000e+00 0.000000000000000000e+00 2.941176593303679865e-01 3.332849365234380002e+03 3.786752223968509856e+00 1.000000000000000000e+00 5.527991333007810226e+02 -1.002500000000000000e+02 4.625000000000000000e+01
6.400000000000000000e+01 1.602646153846149900e+03 6.121586914062500000e+02 7.995147705078119671e+00 0.000000000000000000e+00 0.000000000000000000e+00 3.634761718750000000e+03 2.614599704742429864e+00 4.000000000000000000e+00 1.220056152343750000e+02 -1.232500000000000000e+02 4.675000000000000000e+01
5.200000000000000000e+01 1.328630769230770056e+03 5.769000854492189774e+02 7.366333007812500000e+00 0.000000000000000000e+00 0.000000000000000000e+00 3.474540771484380002e+03 2.615198135375980115e+00 4.000000000000000000e+00 1.456142883300780113e+02 -1.227500000000000000e+02 4.675000000000000000e+01
4.700000000000000000e+01 1.933915384615379935e+03 6.518492431640620453e+02 6.220336914062500000e+00 0.000000000000000000e+00 0.000000000000000000e+00 3.188230468750000000e+03 2.191069841384889916e+00 4.000000000000000000e+00 1.464969970703119998e+03 -1.217500000000000000e+02 4.675000000000000000e+01
6.500000000000000000e+01 1.261730769230769965e+03 5.915612182617189774e+02 6.038085937500000000e+00 0.000000000000000000e+00 0.000000000000000000e+00 3.164535400390619998e+03 2.136609077453610173e+00 4.000000000000000000e+00 1.450888061523440001e+03 -1.212500000000000000e+02 4.675000000000000000e+01
5.000000000000000000e+00 3.409769230769230148e+02 3.522915649414060226e+02 5.855804443359380329e+00 0.000000000000000000e+00 2.352941185235979948e-01 3.140840576171880002e+03 3.421410799026490146e+00 1.000000000000000000e+00 7.815430297851560226e+02 -1.207500000000000000e+02 4.675000000000000000e+01
2.000000000000000000e+00 1.418000000000000114e+02 1.462447052001949999e+02 5.673553466796880329e+00 0.000000000000000000e+00 0.000000000000000000e+00 3.117145751953119998e+03 2.201986312866210049e+00 1.000000000000000000e+00 7.077813720703120453e+02 -1.202500000000000000e+02 4.675000000000000000e+01
0.000000000000000000e+00 1.328384615384620133e+02 1.109687500000000000e+02 5.459136962890619671e+00 0.000000000000000000e+00 8.235294222831730515e-01 3.075937744140619998e+03 3.020125389099120206e+00 1.000000000000000000e+00 3.454535522460939774e+02 -1.197500000000000000e+02 4.675000000000000000e+01
0.000000000000000000e+00 2.470999999999999943e+02 1.397449188232419885e+02 4.965911865234380329e+00 0.000000000000000000e+00 1.117647051811220038e+00 2.958496582031250000e+03 2.448948144912720171e+00 1.000000000000000000e+00 3.816527099609380116e+02 -1.187500000000000000e+02 4.675000000000000000e+01
2.000000000000000000e+00 3.235384615384620020e+02 2.013815307617190058e+02 4.719299316406250000e+00 0.000000000000000000e+00 9.411764740943909802e-01 2.899775878906250000e+03 2.321405410766599786e+00 1.000000000000000000e+00 3.687482299804689774e+02 -1.182500000000000000e+02 4.675000000000000000e+01
4.000000000000000000e+00 3.755923076923079975e+02 2.687929992675780113e+02 4.303222656250000000e+00 0.000000000000000000e+00 2.941176593303679865e-01 2.809367919921880002e+03 4.232812881469730115e+00 1.000000000000000000e+00 4.982291870117189774e+02 -1.177500000000000000e+02 4.675000000000000000e+01
4.000000000000000000e+00 4.684923076923070084e+02 3.070949401855469887e+02 3.830657958984379885e+00 0.000000000000000000e+00 2.294117689132689986e+00 2.708397705078119998e+03 4.184012889862059659e+00 1.000000000000000000e+00 7.544389648437500000e+02 -1.172500000000000000e+02 4.675000000000000000e+01
2.700000000000000000e+01 6.416615384615380435e+02 4.482746276855469887e+02 3.358093261718750000e+00 0.000000000000000000e+00 1.176470637321469948e+00 2.607427246093750000e+03 3.398924112319949842e+00 3.000000000000000000e+00 8.367127685546879547e+02 -1.167500000000000000e+02 4.675000000000000000e+01
5.800000000000000000e+01 7.876615384615389530e+02 5.567056884765620453e+02 2.885498046875000000e+00 0.000000000000000000e+00 0.000000000000000000e+00 2.506457031250000000e+03 2.529758691787720171e+00 4.000000000000000000e+00 9.097172241210939774e+02 -1.162500000000000000e+02 4.675000000000000000e+01
3.300000000000000000e+01 7.879307692307700108e+02 6.319589233398439774e+02 2.378723144531250000e+00 0.000000000000000000e+00 2.352941185235979948e-01 2.418593017578119998e+03 2.347678899765010208e+00 3.000000000000000000e+00 1.179509033203119998e+03 -1.157500000000000000e+02 4.675000000000000000e+01
6.300000000000000000e+01 6.098307692307689649e+02 6.505554809570310226e+02 1.871948242187500000e+00 0.000000000000000000e+00 6.470588445663449928e-01 2.330729248046880002e+03 2.192387819290159801e+00 4.000000000000000000e+00 1.544061889648440001e+03 -1.152500000000000000e+02 4.675000000000000000e+01
6.400000000000000000e+01 4.475307692307690104e+02 5.653915405273439774e+02 1.365173339843750000e+00 0.000000000000000000e+00 7.058823704719540126e-01 2.242865478515619998e+03 2.118382930755620119e+00 4.000000000000000000e+00 1.863791870117190001e+03 -1.147500000000000000e+02 4.675000000000000000e+01
2.900000000000000000e+01 3.965000000000000000e+02 3.213984069824219887e+02 9.601440429687500000e-01 0.000000000000000000e+00 2.352941185235979948e-01 2.178938232421880002e+03 2.207187652587890181e+00 3.000000000000000000e+00 1.409171508789059999e+03 -1.142500000000000000e+02 4.675000000000000000e+01
4.200000000000000000e+01 3.207307692307689990e+02 3.111162109375000000e+02 8.604125976562500000e-01 0.000000000000000000e+00 5.294117927551269531e-01 2.186821533203119998e+03 2.213903188705439895e+00 3.000000000000000000e+00 1.353255493164059999e+03 -1.137500000000000000e+02 4.675000000000000000e+01
3.300000000000000000e+01 2.888692307692310237e+02 3.077062683105469887e+02 7.606811523437500000e-01 0.000000000000000000e+00 4.117647111415860262e-01 2.194704589843750000e+03 2.327782392501830167e+00 3.000000000000000000e+00 1.587174438476559999e+03 -1.132500000000000000e+02 4.675000000000000000e+01
7.000000000000000000e+00 3.199923076923079748e+02 3.239222106933589771e+02 6.609191894531250000e-01 0.000000000000000000e+00 2.352941185235979948e-01 2.202587890625000000e+03 2.389403104782100051e+00 1.000000000000000000e+00 1.546779052734380002e+03 -1.127500000000000000e+02 4.675000000000000000e+01
4.000000000000000000e+00 3.153846153846159837e+02 2.999081115722660229e+02 7.891845703125000000e-01 0.000000000000000000e+00 4.705882370471949905e-01 2.250194824218750000e+03 2.345552682876590023e+00 1.000000000000000000e+00 1.518470214843750000e+03 -1.122500000000000000e+02 4.675000000000000000e+01
4.200000000000000000e+01 3.460000000000000000e+02 2.569897155761719887e+02 1.145477294921880107e+00 0.000000000000000000e+00 8.235294222831730515e-01 2.337525878906250000e+03 2.788992643356320134e+00 3.000000000000000000e+00 1.482309692382809999e+03 -1.117500000000000000e+02 4.675000000000000000e+01
2.000000000000000000e+00 3.729076923076920025e+02 3.602467651367189774e+02 1.501739501953119893e+00 0.000000000000000000e+00 2.352941185235979948e-01 2.424856933593750000e+03 2.873927116394039860e+00 1.000000000000000000e+00 1.570304809570309999e+03 -1.112500000000000000e+02 4.675000000000000000e+01
7.000000000000000000e+00 3.777076923076920139e+02 2.712533569335939774e+02 2.882202148437500000e+00 0.000000000000000000e+00 8.823529481887819603e-01 2.766246093750000000e+03 3.308242559432979846e+00 1.000000000000000000e+00 1.379353515625000000e+03 -1.097500000000000000e+02 4.675000000000000000e+01
1.100000000000000000e+01 3.488307692307690218e+02 1.861326446533199999e+02 3.950897216796879885e+00 0.000000000000000000e+00 3.529411852359770063e-01 3.031646484375000000e+03 3.582795143127440074e+00 1.000000000000000000e+00 1.215498535156250000e+03 -1.087500000000000000e+02 4.675000000000000000e+01
1.000000000000000000e+00 3.291000000000000227e+02 1.699135894775390057e+02 4.250610351562500000e+00 0.000000000000000000e+00 4.117647111415860262e-01 3.129307128906250000e+03 3.828811645507809835e+00 1.000000000000000000e+00 9.686076049804689774e+02 -1.082500000000000000e+02 4.675000000000000000e+01
2.000000000000000000e+00 3.289384615384619792e+02 1.792972564697269888e+02 4.550354003906250000e+00 0.000000000000000000e+00 0.000000000000000000e+00 3.226967773437500000e+03 2.915812492370609910e+00 1.000000000000000000e+00 9.114133300781250000e+02 -1.077500000000000000e+02 4.675000000000000000e+01
0.000000000000000000e+00 3.308384615384609901e+02 1.712577819824219887e+02 4.850067138671880329e+00 0.000000000000000000e+00 0.000000000000000000e+00 3.324628173828119998e+03 2.046703577041629973e+00 1.000000000000000000e+00 8.980895385742189774e+02 -1.072500000000000000e+02 4.675000000000000000e+01
1.000000000000000000e+00 3.268999999999999773e+02 1.527278594970699999e+02 5.051544189453119671e+00 0.000000000000000000e+00 2.352941185235979948e-01 3.400289306640619998e+03 2.047773122787480027e+00 1.000000000000000000e+00 8.838076782226560226e+02 -1.067500000000000000e+02 4.675000000000000000e+01
0.000000000000000000e+00 3.293923076923080089e+02 1.409511108398440058e+02 4.958221435546880329e+00 0.000000000000000000e+00 0.000000000000000000e+00 3.409952392578119998e+03 2.228572368621830169e+00 1.000000000000000000e+00 8.735794677734379547e+02 -1.062500000000000000e+02 4.675000000000000000e+01
3.000000000000000000e+00 3.728461538461539817e+02 1.415375823974609943e+02 4.864898681640619671e+00 0.000000000000000000e+00 0.000000000000000000e+00 3.419615234375000000e+03 2.142149925231930041e+00 1.000000000000000000e+00 8.525288696289060226e+02 -1.057500000000000000e+02 4.675000000000000000e+01
1.000000000000000000e+00 4.425615384615380208e+02 1.563963775634769888e+02 4.771606445312500000e+00 0.000000000000000000e+00 2.352941185235979948e-01 3.429278320312500000e+03 3.393479108810419920e+00 1.000000000000000000e+00 7.587098999023439774e+02 -1.052500000000000000e+02 4.675000000000000000e+01
4.000000000000000000e+00 4.498846153846159837e+02 1.644709930419919885e+02 4.609985351562500000e+00 0.000000000000000000e+00 5.882353186607359730e-01 3.419268554687500000e+03 3.848288774490359998e+00 1.000000000000000000e+00 7.565676879882810226e+02 -1.047500000000000000e+02 4.675000000000000000e+01
4.000000000000000000e+00 4.120307692307690104e+02 1.790699005126949999e+02 4.380035400390619671e+00 0.000000000000000000e+00 0.000000000000000000e+00 3.389586181640619998e+03 3.793369770050050160e+00 1.000000000000000000e+00 9.012271118164060226e+02 -1.042500000000000000e+02 4.675000000000000000e+01
5.000000000000000000e+00 3.838923076923080089e+02 1.802990417480469887e+02 4.150085449218750000e+00 0.000000000000000000e+00 7.058823704719540126e-01 3.359903808593750000e+03 3.757860183715819868e+00 1.000000000000000000e+00 8.257086181640620453e+02 -1.037500000000000000e+02 4.675000000000000000e+01
4.000000000000000000e+00 3.713153846153840050e+02 1.702406768798830115e+02 3.920135498046879885e+00 0.000000000000000000e+00 2.941176593303679865e-01 3.330221435546880002e+03 3.745823144912720171e+00 1.000000000000000000e+00 8.341164550781250000e+02 -1.032500000000000000e+02 4.675000000000000000e+01
5.000000000000000000e+00 3.841846153846159950e+02 1.786345520019530113e+02 3.792449951171879885e+00 0.000000000000000000e+00 2.941176593303679865e-01 3.315535400390619998e+03 3.737932920455929953e+00 1.000000000000000000e+00 7.718795776367189774e+02 -1.027500000000000000e+02 4.675000000000000000e+01
5.000000000000000000e+00 3.652846153846160178e+02 1.797136230468750000e+02 3.698822021484379885e+00 0.000000000000000000e+00 2.352941185235979948e-01 3.305848388671880002e+03 3.734920501708979934e+00 1.000000000000000000e+00 7.026195068359379547e+02 -1.022500000000000000e+02 4.675000000000000000e+01
4.000000000000000000e+00 4.099846153846149832e+02 1.770519866943359943e+02 3.605194091796879885e+00 0.000000000000000000e+00 0.000000000000000000e+00 3.296161132812500000e+03 3.742575407028200019e+00 1.000000000000000000e+00 6.885114746093750000e+02 -1.017500000000000000e+02 4.675000000000000000e+01
6.000000000000000000e+00 4.574307692307689877e+02 2.048464202880859943e+02 3.511596679687500000e+00 0.000000000000000000e+00 0.000000000000000000e+00 3.286474121093750000e+03 3.720828771591190076e+00 1.000000000000000000e+00 6.171341552734379547e+02 -1.012500000000000000e+02 4.675000000000000000e+01
5.000000000000000000e+00 4.837769230769230262e+02 2.180747985839840055e+02 3.579589843750000000e+00 0.000000000000000000e+00 0.000000000000000000e+00 3.300136474609380002e+03 3.711968660354609817e+00 1.000000000000000000e+00 5.092751770019530113e+02 -1.007500000000000000e+02 4.675000000000000000e+01
5.200000000000000000e+01 2.747192307692309896e+03 6.649823608398439774e+02 7.964294433593750000e+00 0.000000000000000000e+00 0.000000000000000000e+00 3.561778808593750000e+03 2.604146242141720080e+00 4.000000000000000000e+00 1.907066955566409945e+02 -1.237500000000000000e+02 4.725000000000000000e+01
6.600000000000000000e+01 1.751176923076920048e+03 6.522858886718750000e+02 7.363342285156250000e+00 0.000000000000000000e+00 0.000000000000000000e+00 3.415091796875000000e+03 2.633734941482539949e+00 4.000000000000000000e+00 1.300086517333980112e+02 -1.232500000000000000e+02 4.725000000000000000e+01
1.000000000000000000e+01 1.038938461538459933e+03 5.505698242187500000e+02 6.161468505859380329e+00 0.000000000000000000e+00 0.000000000000000000e+00 3.121717773437500000e+03 2.743133783340450105e+00 1.000000000000000000e+00 1.048763580322270030e+02 -1.222500000000000000e+02 4.725000000000000000e+01
6.900000000000000000e+01 2.229884615384619792e+03 6.413749389648439774e+02 5.659545898437500000e+00 0.000000000000000000e+00 0.000000000000000000e+00 3.006158203125000000e+03 2.513885498046879885e+00 4.000000000000000000e+00 6.134566040039060226e+02 -1.217500000000000000e+02 4.725000000000000000e+01
6.100000000000000000e+01 1.435684615384619974e+03 6.553176879882810226e+02 5.454711914062500000e+00 0.000000000000000000e+00 8.235294222831730515e-01 2.983980224609380002e+03 2.280065298080439895e+00 4.000000000000000000e+00 9.901130371093750000e+02 -1.212500000000000000e+02 4.725000000000000000e+01
6.100000000000000000e+01 5.932615384615389758e+02 4.861933593750000000e+02 5.249908447265619671e+00 0.000000000000000000e+00 7.058823704719540126e-01 2.961802246093750000e+03 2.531803131103520066e+00 4.000000000000000000e+00 1.067108276367190001e+03 -1.207500000000000000e+02 4.725000000000000000e+01
2.400000000000000000e+01 2.362846153846149946e+02 2.461626892089840055e+02 5.045074462890619671e+00 0.000000000000000000e+00 4.705882370471949905e-01 2.939624267578119998e+03 2.178804636001590023e+00 3.000000000000000000e+00 1.238186401367190001e+03 -1.202500000000000000e+02 4.725000000000000000e+01
1.000000000000000000e+00 2.095000000000000000e+02 1.371409149169919885e+02 4.311431884765619671e+00 0.000000000000000000e+00 9.411764740943909802e-01 2.794249511718750000e+03 2.357105016708370027e+00 1.000000000000000000e+00 5.214158935546879547e+02 -1.187500000000000000e+02 4.725000000000000000e+01
2.000000000000000000e+00 2.583384615384620133e+02 1.906089019775390057e+02 4.058929443359380329e+00 0.000000000000000000e+00 0.000000000000000000e+00 2.740535156250000000e+03 2.240097999572749909e+00 1.000000000000000000e+00 5.874266967773439774e+02 -1.182500000000000000e+02 4.725000000000000000e+01
5.000000000000000000e+00 3.668846153846150173e+02 2.492277526855469887e+02 3.666992187500000000e+00 0.000000000000000000e+00 0.000000000000000000e+00 2.662634277343750000e+03 3.578679084777829811e+00 1.000000000000000000e+00 6.706182861328120453e+02 -1.177500000000000000e+02 4.725000000000000000e+01
8.000000000000000000e+00 5.127384615384610242e+02 3.123017272949219887e+02 3.228576660156250000e+00 0.000000000000000000e+00 4.705882370471949905e-01 2.576671142578119998e+03 3.963455915451049805e+00 1.000000000000000000e+00 7.544638061523439774e+02 -1.172500000000000000e+02 4.725000000000000000e+01
4.100000000000000000e+01 7.392769230769230262e+02 4.548070983886719887e+02 2.790161132812500000e+00 0.000000000000000000e+00 1.117647051811220038e+00 2.490708007812500000e+03 2.770161628723140090e+00 3.000000000000000000e+00 9.471166992187500000e+02 -1.167500000000000000e+02 4.725000000000000000e+01
3.200000000000000000e+01 9.409153846153850509e+02 5.644319458007810226e+02 2.351745605468750000e+00 0.000000000000000000e+00 2.352941185235979948e-01 2.404744628906250000e+03 2.333306550979609817e+00 3.000000000000000000e+00 9.718350830078120453e+02 -1.162500000000000000e+02 4.725000000000000000e+01
6.000000000000000000e+01 8.879230769230770193e+02 6.306071777343750000e+02 1.976318359375000000e+00 0.000000000000000000e+00 2.352941185235979948e-01 2.343325927734380002e+03 2.221303462982179955e+00 4.000000000000000000e+00 1.170162231445309999e+03 -1.157500000000000000e+02 4.725000000000000000e+01
5.900000000000000000e+01 6.645846153846149491e+02 5.165820312500000000e+02 1.600860595703119893e+00 0.000000000000000000e+00 0.000000000000000000e+00 2.281907226562500000e+03 2.164935111999509942e+00 4.000000000000000000e+00 1.389032836914059999e+03 -1.152500000000000000e+02 4.725000000000000000e+01
4.100000000000000000e+01 4.889384615384619792e+02 4.194403991699219887e+02 1.225433349609380107e+00 0.000000000000000000e+00 5.882353186607359730e-01 2.220488281250000000e+03 2.604472160339359910e+00 3.000000000000000000e+00 1.643805786132809999e+03 -1.147500000000000000e+02 4.725000000000000000e+01
4.200000000000000000e+01 3.787846153846149946e+02 3.525540771484380116e+02 9.432983398437500000e-01 0.000000000000000000e+00 6.470588445663449928e-01 2.180686767578119998e+03 3.386330842971799981e+00 3.000000000000000000e+00 9.955653686523439774e+02 -1.142500000000000000e+02 4.725000000000000000e+01
5.300000000000000000e+01 3.595307692307690104e+02 4.770409240722660229e+02 9.410705566406250000e-01 0.000000000000000000e+00 5.294117927551269531e-01 2.205737060546880002e+03 2.113864421844480201e+00 4.000000000000000000e+00 1.945607910156250000e+03 -1.137500000000000000e+02 4.725000000000000000e+01
2.900000000000000000e+01 3.607538461538459842e+02 4.162661437988280113e+02 9.388427734375000000e-01 9.999999776482580358e-03 1.117647051811220038e+00 2.230787109375000000e+03 2.098239660263060191e+00 3.000000000000000000e+00 1.995251464843750000e+03 -1.132500000000000000e+02 4.725000000000000000e+01
6.000000000000000000e+00 3.121230769230770079e+02 2.833214721679689774e+02 1.125091552734380107e+00 0.000000000000000000e+00 2.941176593303679865e-01 2.316707275390619998e+03 3.375539064407349965e+00 1.000000000000000000e+00 1.304160888671880002e+03 -1.122500000000000000e+02 4.725000000000000000e+01
2.000000000000000000e+00 3.747307692307689990e+02 1.927749023437500000e+02 1.504211425781250000e+00 0.000000000000000000e+00 5.882352963089940157e-02 2.413396728515619998e+03 3.650040626525879794e+00 1.000000000000000000e+00 1.130923583984380002e+03 -1.117500000000000000e+02 4.725000000000000000e+01
6.000000000000000000e+00 3.611846153846149718e+02 2.068322753906250000e+02 1.883361816406250000e+00 0.000000000000000000e+00 2.941176593303679865e-01 2.510086181640619998e+03 2.956548929214480204e+00 1.000000000000000000e+00 1.291713134765619998e+03 -1.112500000000000000e+02 4.725000000000000000e+01
9.000000000000000000e+00 3.516692307692309782e+02 2.688227233886719887e+02 2.262481689453120115e+00 0.000000000000000000e+00 0.000000000000000000e+00 2.606775634765619998e+03 3.404820203781130150e+00 1.000000000000000000e+00 1.366420410156250000e+03 -1.107500000000000000e+02 4.725000000000000000e+01
1.000000000000000000e+00 3.510692307692310123e+02 2.497813568115230112e+02 2.707092285156250000e+00 0.000000000000000000e+00 0.000000000000000000e+00 2.722212402343750000e+03 3.648334503173829901e+00 1.000000000000000000e+00 1.237072753906250000e+03 -1.102500000000000000e+02 4.725000000000000000e+01
1.100000000000000000e+01 3.662615384615380094e+02 2.104776000976559942e+02 3.173553466796879885e+00 0.000000000000000000e+00 6.470588445663449928e-01 2.843898437500000000e+03 3.691893100738529832e+00 1.000000000000000000e+00 1.086061889648440001e+03 -1.097500000000000000e+02 4.725000000000000000e+01
9.000000000000000000e+00 3.821384615384620247e+02 2.012837371826169885e+02 3.640014648437500000e+00 0.000000000000000000e+00 0.000000000000000000e+00 2.965584472656250000e+03 3.682274580001830167e+00 1.000000000000000000e+00 1.402520385742190001e+03 -1.092500000000000000e+02 4.725000000000000000e+01
7.000000000000000000e+00 3.480846153846159723e+02 1.821169891357419885e+02 4.106475830078119671e+00 0.000000000000000000e+00 5.882352963089940157e-02 3.087270507812500000e+03 3.783382654190059924e+00 1.000000000000000000e+00 9.809133300781250000e+02 -1.087500000000000000e+02 4.725000000000000000e+01
1.200000000000000000e+01 3.188153846153850282e+02 1.632760620117190058e+02 4.304901123046880329e+00 0.000000000000000000e+00 5.882352963089940157e-02 3.161798339843750000e+03 3.860487461090090111e+00 1.000000000000000000e+00 8.582817993164060226e+02 -1.082500000000000000e+02 4.725000000000000000e+01
5.000000000000000000e+00 3.123538461538460069e+02 1.634889831542969887e+02 4.503356933593750000e+00 0.000000000000000000e+00 7.647058963775630325e-01 3.236326171875000000e+03 3.049580335617069871e+00 1.000000000000000000e+00 8.612691650390620453e+02 -1.077500000000000000e+02 4.725000000000000000e+01
4.000000000000000000e+00 3.152076923076920139e+02 1.600846710205080115e+02 4.701782226562500000e+00 0.000000000000000000e+00 3.529411852359770063e-01 3.310853759765619998e+03 2.146009922027590111e+00 1.000000000000000000e+00 8.902537231445310226e+02 -1.072500000000000000e+02 4.725000000000000000e+01
1.000000000000000000e+00 3.210615384615380208e+02 1.453527526855469887e+02 4.812225341796880329e+00 0.000000000000000000e+00 2.941176593303679865e-01 3.365359375000000000e+03 2.037675857543950197e+00 1.000000000000000000e+00 8.225985107421879547e+02 -1.067500000000000000e+02 4.725000000000000000e+01
2.000000000000000000e+00 3.380538461538459956e+02 1.394691467285159945e+02 4.658691406250000000e+00 0.000000000000000000e+00 0.000000000000000000e+00 3.359798583984380002e+03 3.689341545104980025e+00 1.000000000000000000e+00 7.772671508789060226e+02 -1.062500000000000000e+02 4.725000000000000000e+01
0.000000000000000000e+00 3.777076923076920139e+02 1.424101562500000000e+02 4.505157470703119671e+00 0.000000000000000000e+00 2.941176593303679865e-01 3.354238037109380002e+03 3.876015424728390002e+00 1.000000000000000000e+00 8.265492553710939774e+02 -1.057500000000000000e+02 4.725000000000000000e+01
4.000000000000000000e+00 3.983692307692310237e+02 1.485694274902340055e+02 4.351623535156250000e+00 0.000000000000000000e+00 0.000000000000000000e+00 3.348677246093750000e+03 3.856363296508789951e+00 1.000000000000000000e+00 8.823294677734379547e+02 -1.052500000000000000e+02 4.725000000000000000e+01
3.000000000000000000e+00 3.740461538461540272e+02 1.523598632812500000e+02 4.153076171875000000e+00 0.000000000000000000e+00 2.941176593303679865e-01 3.329728759765619998e+03 3.834473133087159979e+00 1.000000000000000000e+00 7.463109130859379547e+02 -1.047500000000000000e+02 4.725000000000000000e+01
5.000000000000000000e+00 3.715076923076920252e+02 1.680107116699219887e+02 3.909545898437500000e+00 0.000000000000000000e+00 0.000000000000000000e+00 3.297392822265619998e+03 3.798341035842899949e+00 1.000000000000000000e+00 7.249975585937500000e+02 -1.042500000000000000e+02 4.725000000000000000e+01
1.000000000000000000e+00 3.805615384615380208e+02 1.794918823242190058e+02 3.665985107421879885e+00 0.000000000000000000e+00 0.000000000000000000e+00 3.265056884765619998e+03 3.779207944870000002e+00 1.000000000000000000e+00 6.872074584960939774e+02 -1.037500000000000000e+02 4.725000000000000000e+01
4.000000000000000000e+00 3.974615384615390212e+02 1.874999847412109943e+02 3.422454833984379885e+00 0.000000000000000000e+00 2.941176593303679865e-01 3.232720947265619998e+03 3.756290674209589842e+00 1.000000000000000000e+00 8.024483642578120453e+02 -1.032500000000000000e+02 4.725000000000000000e+01
6.000000000000000000e+00 3.898076923076919797e+02 1.914196319580080115e+02 3.304168701171879885e+00 0.000000000000000000e+00 0.000000000000000000e+00 3.219239990234380002e+03 3.749397993087769887e+00 1.000000000000000000e+00 6.916053466796879547e+02 -1.027500000000000000e+02 4.725000000000000000e+01
4.000000000000000000e+00 4.048615384615379753e+02 1.962992553710940058e+02 3.227661132812500000e+00 0.000000000000000000e+00 0.000000000000000000e+00 3.212044433593750000e+03 3.747205018997190162e+00 1.000000000000000000e+00 6.655668334960939774e+02 -1.022500000000000000e+02 4.725000000000000000e+01
4.000000000000000000e+00 4.369307692307689877e+02 2.021855316162109943e+02 3.151123046875000000e+00 0.000000000000000000e+00 5.882352963089940157e-02 3.204848632812500000e+03 3.714246749877930132e+00 1.000000000000000000e+00 5.952271118164060226e+02 -1.017500000000000000e+02 4.725000000000000000e+01
2.100000000000000000e+01 2.690192307692309896e+03 6.543631591796879547e+02 7.304656982421880329e+00 0.000000000000000000e+00 2.941176593303679865e-01 3.328574951171880002e+03 2.423252105712890181e+00 3.000000000000000000e+00 1.167061767578119998e+03 -1.237500000000000000e+02 4.775000000000000000e+01
2.200000000000000000e+01 1.891569230769229989e+03 6.379893188476560226e+02 6.731567382812500000e+00 0.000000000000000000e+00 0.000000000000000000e+00 3.195421875000000000e+03 2.428784847259520152e+00 3.000000000000000000e+00 1.264101440429690001e+03 -1.232500000000000000e+02 4.775000000000000000e+01
7.200000000000000000e+01 1.798653846153850054e+03 6.569544067382810226e+02 5.098785400390619671e+00 0.000000000000000000e+00 0.000000000000000000e+00 2.824085937500000000e+03 2.530384063720700016e+00 4.000000000000000000e+00 6.242059936523439774e+02 -1.217500000000000000e+02 4.775000000000000000e+01
7.200000000000000000e+01 1.496515384615390076e+03 6.805657958984379547e+02 4.871368408203119671e+00 0.000000000000000000e+00 0.000000000000000000e+00 2.803425048828119998e+03 2.165550708770750177e+00 4.000000000000000000e+00 1.125538452148440001e+03 -1.212500000000000000e+02 4.775000000000000000e+01
3.300000000000000000e+01 8.922615384615379526e+02 5.274717407226560226e+02 4.643981933593750000e+00 0.000000000000000000e+00 1.117647051811220038e+00 2.782763916015619998e+03 2.149273633956910068e+00 3.000000000000000000e+00 8.717946166992189774e+02 -1.207500000000000000e+02 4.775000000000000000e+01
2.000000000000000000e+00 3.711307692307689763e+02 3.052067871093750000e+02 4.416564941406250000e+00 0.000000000000000000e+00 1.176470637321469948e+00 2.762103027343750000e+03 3.080788135528560012e+00 1.000000000000000000e+00 6.272610473632810226e+02 -1.202500000000000000e+02 4.775000000000000000e+01
3.000000000000000000e+00 1.822076923076920139e+02 1.794528198242190058e+02 4.173675537109380329e+00 0.000000000000000000e+00 1.058823585510249909e+00 2.727418701171880002e+03 2.167985200881959784e+00 1.000000000000000000e+00 7.656343383789060226e+02 -1.197500000000000000e+02 4.775000000000000000e+01
2.000000000000000000e+00 2.284461538461540044e+02 1.742242126464840055e+02 3.656921386718750000e+00 0.000000000000000000e+00 8.823529481887819603e-01 2.630002685546880002e+03 3.925003051757809835e+00 1.000000000000000000e+00 6.742841186523439774e+02 -1.187500000000000000e+02 4.775000000000000000e+01
5.000000000000000000e+00 2.568076923076919797e+02 2.446272888183590055e+02 3.398559570312500000e+00 0.000000000000000000e+00 2.941176593303679865e-01 2.581294677734380002e+03 3.863849401473999912e+00 1.000000000000000000e+00 6.974080810546879547e+02 -1.182500000000000000e+02 4.775000000000000000e+01
2.000000000000000000e+00 5.388615384615379753e+02 3.340618591308589771e+02 2.626525878906250000e+00 0.000000000000000000e+00 0.000000000000000000e+00 2.444944580078119998e+03 3.686061382293699840e+00 1.000000000000000000e+00 6.931889648437500000e+02 -1.172500000000000000e+02 4.775000000000000000e+01
5.000000000000000000e+01 7.491000000000000227e+02 4.037808532714839771e+02 2.222259521484379885e+00 0.000000000000000000e+00 5.294117927551269531e-01 2.373988525390619998e+03 2.396301984786989969e+00 4.000000000000000000e+00 8.314124755859379547e+02 -1.167500000000000000e+02 4.775000000000000000e+01
6.100000000000000000e+01 9.104230769230770193e+02 5.460772094726560226e+02 1.818023681640619893e+00 0.000000000000000000e+00 5.882352963089940157e-02 2.303032470703119998e+03 2.324731349945070136e+00 4.000000000000000000e+00 1.178701782226559999e+03 -1.162500000000000000e+02 4.775000000000000000e+01
6.700000000000000000e+01 8.683153846153840050e+02 5.718823852539060226e+02 1.573913574218750000e+00 0.000000000000000000e+00 5.294117927551269531e-01 2.268058837890619998e+03 2.280663251876830167e+00 4.000000000000000000e+00 1.413295898437500000e+03 -1.157500000000000000e+02 4.775000000000000000e+01
6.400000000000000000e+01 6.325461538461539703e+02 3.865289611816410229e+02 1.329803466796880107e+00 0.000000000000000000e+00 0.000000000000000000e+00 2.233084960937500000e+03 2.209047317504880148e+00 4.000000000000000000e+00 1.738085937500000000e+03 -1.152500000000000000e+02 4.775000000000000000e+01
2.700000000000000000e+01 4.591923076923080203e+02 2.498888854980469887e+02 1.085693359375000000e+00 0.000000000000000000e+00 8.235294222831730515e-01 2.198111328125000000e+03 2.380989313125609907e+00 3.000000000000000000e+00 1.286819946289059999e+03 -1.147500000000000000e+02 4.775000000000000000e+01
4.700000000000000000e+01 4.269538461538459728e+02 5.469240112304689774e+02 1.021759033203119893e+00 0.000000000000000000e+00 0.000000000000000000e+00 2.224652587890619998e+03 2.036402702331539860e+00 4.000000000000000000e+00 1.567904907226559999e+03 -1.137500000000000000e+02 4.775000000000000000e+01
3.000000000000000000e+00 2.935076923076920252e+02 2.171089782714840055e+02 1.460968017578119893e+00 0.000000000000000000e+00 2.941176593303679865e-01 2.383219726562500000e+03 3.588345289230349788e+00 1.000000000000000000e+00 1.221200195312500000e+03 -1.122500000000000000e+02 4.775000000000000000e+01
3.000000000000000000e+00 3.231692307692309782e+02 1.610702514648440058e+02 1.862976074218750000e+00 0.000000000000000000e+00 0.000000000000000000e+00 2.489267578125000000e+03 3.549446105957029918e+00 1.000000000000000000e+00 1.141516357421880002e+03 -1.117500000000000000e+02 4.775000000000000000e+01
1.000000000000000000e+00 3.491615384615379867e+02 1.574191436767580115e+02 2.264953613281250000e+00 0.000000000000000000e+00 5.294117927551269531e-01 2.595315429687500000e+03 2.005425930023189807e+00 1.000000000000000000e+00 1.086936645507809999e+03 -1.112500000000000000e+02 4.775000000000000000e+01
3.000000000000000000e+00 3.492230769230769738e+02 1.744651794433590055e+02 2.666961669921879885e+00 0.000000000000000000e+00 5.882353186607359730e-01 2.701363281250000000e+03 2.569548845291139916e+00 1.000000000000000000e+00 9.292982177734379547e+02 -1.107500000000000000e+02 4.775000000000000000e+01
1.000000000000000000e+00 3.428076923076919797e+02 2.008076171875000000e+02 3.066375732421879885e+00 0.000000000000000000e+00 1.176470637321469948e+00 2.810879150390619998e+03 3.572561740875240144e+00 1.000000000000000000e+00 9.641944580078120453e+02 -1.102500000000000000e+02 4.775000000000000000e+01
1.000000000000000000e+00 3.494923076923070084e+02 2.105758056640619884e+02 3.464935302734379885e+00 0.000000000000000000e+00 5.294117927551269531e-01 2.921551025390619998e+03 2.731773853302000177e+00 1.000000000000000000e+00 9.373961791992189774e+02 -1.097500000000000000e+02 4.775000000000000000e+01
4.000000000000000000e+00 3.638923076923080089e+02 1.919552459716800001e+02 3.863494873046879885e+00 0.000000000000000000e+00 5.294117927551269531e-01 3.032222900390619998e+03 3.700781583786009854e+00 1.000000000000000000e+00 9.303168945312500000e+02 -1.092500000000000000e+02 4.775000000000000000e+01
2.000000000000000000e+00 3.596153846153849827e+02 1.735435333251949999e+02 4.262054443359380329e+00 0.000000000000000000e+00 2.941176593303679865e-01 3.142894531250000000e+03 3.741994142532349965e+00 1.000000000000000000e+00 9.270890502929689774e+02 -1.087500000000000000e+02 4.775000000000000000e+01
2.000000000000000000e+00 3.193076923076919797e+02 1.708006439208980112e+02 4.359191894531250000e+00 0.000000000000000000e+00 0.000000000000000000e+00 3.194289550781250000e+03 3.801644086837769887e+00 1.000000000000000000e+00 8.615532836914060226e+02 -1.082500000000000000e+02 4.775000000000000000e+01
0.000000000000000000e+00 3.052461538461540158e+02 1.520659942626949999e+02 4.456359863281250000e+00 0.000000000000000000e+00 2.941176593303679865e-01 3.245684570312500000e+03 2.014976263046260208e+00 1.000000000000000000e+00 7.348628540039060226e+02 -1.077500000000000000e+02 4.775000000000000000e+01
4.000000000000000000e+00 3.033692307692310237e+02 1.516272583007809942e+02 4.553497314453119671e+00 0.000000000000000000e+00 5.294117927551269531e-01 3.297079345703119998e+03 2.004074573516850144e+00 1.000000000000000000e+00 8.580634155273439774e+02 -1.072500000000000000e+02 4.775000000000000000e+01
1.000000000000000000e+00 3.643384615384609901e+02 1.374467620849609943e+02 4.145385742187500000e+00 0.000000000000000000e+00 0.000000000000000000e+00 3.288860595703119998e+03 2.908187150955200195e+00 1.000000000000000000e+00 7.522275390625000000e+02 -1.057500000000000000e+02 4.775000000000000000e+01
4.000000000000000000e+00 3.693153846153840050e+02 1.429629058837890057e+02 3.931610107421879885e+00 0.000000000000000000e+00 0.000000000000000000e+00 3.268076171875000000e+03 3.766719818115229934e+00 1.000000000000000000e+00 6.832718505859379547e+02 -1.052500000000000000e+02 4.775000000000000000e+01
0.000000000000000000e+00 3.659230769230770193e+02 1.563957366943359943e+02 3.696166992187500000e+00 0.000000000000000000e+00 0.000000000000000000e+00 3.240189208984380002e+03 3.750203371047970080e+00 1.000000000000000000e+00 7.738627319335939774e+02 -1.047500000000000000e+02 4.775000000000000000e+01
5.000000000000000000e+00 3.695846153846150060e+02 1.633634948730469887e+02 3.439025878906250000e+00 0.000000000000000000e+00 0.000000000000000000e+00 3.205199462890619998e+03 3.736994743347170189e+00 1.000000000000000000e+00 6.843261108398439774e+02 -1.042500000000000000e+02 4.775000000000000000e+01
5.000000000000000000e+00 3.803000000000000114e+02 1.711610107421880116e+02 3.181915283203120115e+00 0.000000000000000000e+00 0.000000000000000000e+00 3.170209960937500000e+03 3.753937721252440074e+00 1.000000000000000000e+00 6.747360839843750000e+02 -1.037500000000000000e+02 4.775000000000000000e+01
6.000000000000000000e+00 3.896384615384610015e+02 1.796125335693359943e+02 2.924774169921879885e+00 0.000000000000000000e+00 0.000000000000000000e+00 3.135220214843750000e+03 3.716789722442630062e+00 1.000000000000000000e+00 6.531287231445310226e+02 -1.032500000000000000e+02 4.775000000000000000e+01
7.000000000000000000e+00 3.850692307692310123e+02 1.732830810546880116e+02 2.815917968750000000e+00 0.000000000000000000e+00 0.000000000000000000e+00 3.122944580078119998e+03 3.689565896987919924e+00 1.000000000000000000e+00 6.831187744140620453e+02 -1.027500000000000000e+02 4.775000000000000000e+01
1.800000000000000000e+01 1.024084615384620065e+03 4.954282836914060226e+02 5.009399414062500000e+00 0.000000000000000000e+00 0.000000000000000000e+00 2.736513916015619998e+03 2.621299982070920187e+00 1.000000000000000000e+00 1.225346069335940058e+02 -1.222500000000000000e+02 4.825000000000000000e+01
5.600000000000000000e+01 1.607138461538459978e+03 6.465300292968750000e+02 4.537994384765619671e+00 0.000000000000000000e+00 0.000000000000000000e+00 2.642013671875000000e+03 2.287902832031250000e+00 4.000000000000000000e+00 6.917072143554689774e+02 -1.217500000000000000e+02 4.825000000000000000e+01
6.600000000000000000e+01 1.434707692307689967e+03 6.632219848632810226e+02 4.288024902343750000e+00 0.000000000000000000e+00 0.000000000000000000e+00 2.622869628906250000e+03 1.902901887893680088e+00 4.000000000000000000e+00 1.260719970703119998e+03 -1.212500000000000000e+02 4.825000000000000000e+01
6.100000000000000000e+01 1.039415384615379935e+03 5.912322387695310226e+02 4.038055419921880329e+00 0.000000000000000000e+00 2.941176593303679865e-01 2.603725830078119998e+03 1.828472733497620073e+00 4.000000000000000000e+00 1.930480346679690001e+03 -1.207500000000000000e+02 4.825000000000000000e+01
1.300000000000000000e+01 6.168769230769230489e+02 4.128119812011719887e+02 3.788085937500000000e+00 0.000000000000000000e+00 2.352941185235979948e-01 2.584581787109380002e+03 2.483485221862789860e+00 1.000000000000000000e+00 1.366701171875000000e+03 -1.202500000000000000e+02 4.825000000000000000e+01
1.100000000000000000e+01 3.000538461538459956e+02 2.391500244140619884e+02 3.530975341796879885e+00 0.000000000000000000e+00 9.411764740943909802e-01 2.553158935546880002e+03 3.645439386367800072e+00 1.000000000000000000e+00 4.464180297851560226e+02 -1.197500000000000000e+02 4.825000000000000000e+01
2.000000000000000000e+01 3.318461538461539817e+02 2.291722869873050001e+02 3.266693115234379885e+00 0.000000000000000000e+00 1.000000000000000000e+00 2.509457275390619998e+03 2.979017019271850142e+00 3.000000000000000000e+00 7.884856567382810226e+02 -1.192500000000000000e+02 4.825000000000000000e+01
3.500000000000000000e+01 4.192307692307689990e+02 2.481095428466800001e+02 3.002441406250000000e+00 0.000000000000000000e+00 0.000000000000000000e+00 2.465755615234380002e+03 2.379145383834840199e+00 3.000000000000000000e+00 8.529577636718750000e+02 -1.187500000000000000e+02 4.825000000000000000e+01
9.000000000000000000e+00 5.156692307692310351e+02 2.855602722167969887e+02 2.738189697265620115e+00 0.000000000000000000e+00 5.294117927551269531e-01 2.422053955078119998e+03 2.796204566955569959e+00 1.000000000000000000e+00 6.472263183593750000e+02 -1.182500000000000000e+02 4.825000000000000000e+01
1.000000000000000000e+01 6.236230769230769511e+02 3.619960632324219887e+02 2.394531250000000000e+00 0.000000000000000000e+00 0.000000000000000000e+00 2.369166748046880002e+03 2.251188993453979936e+00 1.000000000000000000e+00 5.493026733398439774e+02 -1.177500000000000000e+02 4.825000000000000000e+01
1.400000000000000000e+01 8.005923076923080544e+02 4.718504943847660229e+02 2.024444580078120115e+00 0.000000000000000000e+00 2.941176593303679865e-01 2.313218017578119998e+03 2.178493976593019799e+00 1.000000000000000000e+00 6.505344848632810226e+02 -1.172500000000000000e+02 4.825000000000000000e+01
4.600000000000000000e+01 8.792384615384620474e+02 5.475258789062500000e+02 1.654357910156250000e+00 0.000000000000000000e+00 5.882352963089940157e-02 2.257269042968750000e+03 2.143380880355830076e+00 4.000000000000000000e+00 8.104053344726560226e+02 -1.167500000000000000e+02 4.825000000000000000e+01
2.900000000000000000e+01 8.326153846153849827e+02 6.143392944335939774e+02 1.284271240234380107e+00 0.000000000000000000e+00 0.000000000000000000e+00 2.201320312500000000e+03 2.108018636703489879e+00 3.000000000000000000e+00 1.347689941406250000e+03 -1.162500000000000000e+02 4.825000000000000000e+01
3.200000000000000000e+01 7.277615384615379526e+02 5.788700561523439774e+02 1.171508789062500000e+00 0.000000000000000000e+00 5.882352963089940157e-02 2.192791503906250000e+03 2.074545383453370029e+00 3.000000000000000000e+00 1.690481811523440001e+03 -1.157500000000000000e+02 4.825000000000000000e+01
3.000000000000000000e+01 5.629538461538460297e+02 4.147561645507810226e+02 1.058746337890619893e+00 0.000000000000000000e+00 5.882352963089940157e-02 2.184262939453119998e+03 2.082011699676510119e+00 3.000000000000000000e+00 9.819221801757810226e+02 -1.152500000000000000e+02 4.825000000000000000e+01
5.500000000000000000e+01 5.081076923076930143e+02 3.376484680175780113e+02 9.459838867187500000e-01 0.000000000000000000e+00 5.294117927551269531e-01 2.175734130859380002e+03 2.068041086196899858e+00 4.000000000000000000e+00 1.597120727539059999e+03 -1.147500000000000000e+02 4.825000000000000000e+01
3.900000000000000000e+01 4.661999999999999886e+02 3.739938659667969887e+02 9.096069335937500000e-01 0.000000000000000000e+00 5.294117927551269531e-01 2.184183837890619998e+03 2.049159288406369850e+00 3.000000000000000000e+00 8.956428222656250000e+02 -1.142500000000000000e+02 4.825000000000000000e+01
6.000000000000000000e+00 5.179615384615379980e+02 5.612882690429689774e+02 1.102416992187500000e+00 0.000000000000000000e+00 7.058823704719540126e-01 2.243568115234380002e+03 1.881184577941890090e+00 1.000000000000000000e+00 1.706566162109380002e+03 -1.137500000000000000e+02 4.825000000000000000e+01
6.300000000000000000e+01 4.496000000000000227e+02 5.585682983398439774e+02 1.295227050781250000e+00 9.999999776482580358e-03 8.235294222831730515e-01 2.302952392578119998e+03 1.910676002502440074e+00 4.000000000000000000e+00 1.936269287109380002e+03 -1.132500000000000000e+02 4.825000000000000000e+01
1.500000000000000000e+01 3.659076923076920025e+02 3.851754455566410229e+02 1.488037109375000000e+00 0.000000000000000000e+00 0.000000000000000000e+00 2.362336669921880002e+03 3.134416580200200197e+00 1.000000000000000000e+00 1.367952514648440001e+03 -1.127500000000000000e+02 4.825000000000000000e+01
0.000000000000000000e+00 3.066769230769230035e+02 1.458037872314449999e+02 2.221710205078120115e+00 0.000000000000000000e+00 3.529411852359770063e-01 2.565138427734380002e+03 3.331521749496459961e+00 1.000000000000000000e+00 1.053211303710940001e+03 -1.117500000000000000e+02 4.825000000000000000e+01
0.000000000000000000e+00 3.357153846153850054e+02 1.346213836669919885e+02 2.646575927734379885e+00 0.000000000000000000e+00 2.941176593303679865e-01 2.680544677734380002e+03 1.967495083808900036e+00 1.000000000000000000e+00 9.306052856445310226e+02 -1.112500000000000000e+02 4.825000000000000000e+01
0.000000000000000000e+00 3.484384615384610129e+02 1.292025299072269888e+02 3.071411132812500000e+00 0.000000000000000000e+00 0.000000000000000000e+00 2.795950927734380002e+03 1.966726064682009945e+00 1.000000000000000000e+00 8.951588745117189774e+02 -1.107500000000000000e+02 4.825000000000000000e+01
4.000000000000000000e+00 3.410692307692310123e+02 1.558511810302730112e+02 3.425628662109379885e+00 0.000000000000000000e+00 2.941176593303679865e-01 2.899545898437500000e+03 2.440476894378659889e+00 1.000000000000000000e+00 8.529976806640620453e+02 -1.102500000000000000e+02 4.825000000000000000e+01
8.000000000000000000e+00 3.476000000000000227e+02 2.163930053710940058e+02 3.756286621093750000e+00 0.000000000000000000e+00 1.176470592617989974e-01 2.999203369140619998e+03 3.103976964950560191e+00 1.000000000000000000e+00 1.227140380859380002e+03 -1.097500000000000000e+02 4.825000000000000000e+01
6.000000000000000000e+00 3.705153846153850168e+02 2.271307830810550001e+02 4.086944580078119671e+00 0.000000000000000000e+00 0.000000000000000000e+00 3.098861083984380002e+03 3.544843912124629792e+00 1.000000000000000000e+00 1.203677246093750000e+03 -1.092500000000000000e+02 4.825000000000000000e+01
6.000000000000000000e+00 3.492923076923079861e+02 1.773542633056640057e+02 4.417602539062500000e+00 0.000000000000000000e+00 7.647058963775630325e-01 3.198518554687500000e+03 3.652403593063350051e+00 1.000000000000000000e+00 8.604135131835939774e+02 -1.087500000000000000e+02 4.825000000000000000e+01
5.000000000000000000e+00 3.250384615384620020e+02 1.647046661376949999e+02 4.413482666015619671e+00 0.000000000000000000e+00 5.882352963089940157e-02 3.226780761718750000e+03 3.712234020233149856e+00 1.000000000000000000e+00 7.793036499023439774e+02 -1.082500000000000000e+02 4.825000000000000000e+01
5.000000000000000000e+00 3.047615384615380094e+02 1.539487609863280113e+02 4.409362792968750000e+00 0.000000000000000000e+00 2.941176593303679865e-01 3.255042968750000000e+03 3.734995365142820045e+00 1.000000000000000000e+00 8.111450195312500000e+02 -1.077500000000000000e+02 4.825000000000000000e+01
5.000000000000000000e+00 3.143384615384620133e+02 1.559536895751949999e+02 4.405212402343750000e+00 0.000000000000000000e+00 2.941176593303679865e-01 3.283305175781250000e+03 2.000949621200560191e+00 1.000000000000000000e+00 7.222207031250000000e+02 -1.072500000000000000e+02 4.825000000000000000e+01
4.000000000000000000e+00 3.455923076923079975e+02 1.425945281982419885e+02 4.059631347656250000e+00 0.000000000000000000e+00 5.882353186607359730e-01 3.259491455078119998e+03 2.636134147644039860e+00 1.000000000000000000e+00 7.961530761718750000e+02 -1.062500000000000000e+02 4.825000000000000000e+01
6.000000000000000000e+00 3.668307692307690218e+02 1.377077178955080115e+02 3.785614013671879885e+00 0.000000000000000000e+00 0.000000000000000000e+00 3.223483398437500000e+03 3.604937553405759942e+00 1.000000000000000000e+00 7.447650146484379547e+02 -1.057500000000000000e+02 4.825000000000000000e+01
1.000000000000000000e+00 3.728615384615389985e+02 1.421646423339840055e+02 3.511627197265620115e+00 0.000000000000000000e+00 7.058823704719540126e-01 3.187475097656250000e+03 3.695061206817630062e+00 1.000000000000000000e+00 7.066214599609379547e+02 -1.052500000000000000e+02 4.825000000000000000e+01
6.000000000000000000e+00 3.708999999999999773e+02 1.572142639160159945e+02 3.239257812500000000e+00 0.000000000000000000e+00 0.000000000000000000e+00 3.150649414062500000e+03 3.704357385635379973e+00 1.000000000000000000e+00 6.042296752929689774e+02 -1.047500000000000000e+02 4.825000000000000000e+01
5.000000000000000000e+00 3.711615384615379867e+02 1.715003662109380116e+02 2.968536376953120115e+00 0.000000000000000000e+00 5.294117927551269531e-01 3.113006103515619998e+03 3.695164203643800160e+00 1.000000000000000000e+00 6.855831909179689774e+02 -1.042500000000000000e+02 4.825000000000000000e+01
1.000000000000000000e+00 3.791692307692309782e+02 1.780281677246090055e+02 2.697814941406250000e+00 0.000000000000000000e+00 2.941176593303679865e-01 3.075362792968750000e+03 3.705839633941649947e+00 1.000000000000000000e+00 6.834567871093750000e+02 -1.037500000000000000e+02 4.825000000000000000e+01
7.000000000000000000e+00 3.940615384615380208e+02 1.871454620361330115e+02 2.327636718750000000e+00 0.000000000000000000e+00 0.000000000000000000e+00 3.026649169921880002e+03 3.637906312942499998e+00 1.000000000000000000e+00 6.682427368164060226e+02 -1.027500000000000000e+02 4.825000000000000000e+01
9.000000000000000000e+00 5.808153846153850282e+02 2.284744873046880116e+02 2.387847900390620115e+00 0.000000000000000000e+00 0.000000000000000000e+00 3.051576660156250000e+03 3.622640132904050070e+00 1.000000000000000000e+00 4.664484252929689774e+02 -1.002500000000000000e+02 4.825000000000000000e+01
7.300000000000000000e+01 2.386946153846150082e+03 5.091925659179689774e+02 6.222991943359380329e+00 0.000000000000000000e+00 2.857142857142859829e-02 2.877277832031250000e+03 2.392634868621830169e+00 4.000000000000000000e+00 6.748864746093750000e+02 -1.242500000000000000e+02 4.875000000000000000e+01
6.300000000000000000e+01 1.501700000000000045e+03 4.537833251953119884e+02 5.492340087890619671e+00 0.000000000000000000e+00 0.000000000000000000e+00 2.745518066406250000e+03 2.494972229003909803e+00 4.000000000000000000e+00 9.346152496337890625e+01 -1.237500000000000000e+02 4.875000000000000000e+01
3.700000000000000000e+01 1.373669230769229898e+03 5.786579589843750000e+02 4.078796386718750000e+00 0.000000000000000000e+00 0.000000000000000000e+00 2.488346679687500000e+03 2.460196733474730113e+00 3.000000000000000000e+00 3.786283569335939774e+02 -1.222500000000000000e+02 4.875000000000000000e+01
5.400000000000000000e+01 1.704453846153850009e+03 6.518605346679689774e+02 3.658996582031250000e+00 0.000000000000000000e+00 0.000000000000000000e+00 2.419837890625000000e+03 2.071027517318730027e+00 4.000000000000000000e+00 1.167385131835940001e+03 -1.217500000000000000e+02 4.875000000000000000e+01
5.900000000000000000e+01 1.423561538461540067e+03 6.472657470703120453e+02 3.393371582031250000e+00 0.000000000000000000e+00 0.000000000000000000e+00 2.402973632812500000e+03 1.781570911407470037e+00 4.000000000000000000e+00 1.523854614257809999e+03 -1.212500000000000000e+02 4.875000000000000000e+01
1.400000000000000000e+01 1.057884615384620020e+03 5.897041015625000000e+02 3.127746582031250000e+00 9.999999776482580358e-03 5.882352963089940157e-02 2.386109130859380002e+03 1.671416401863099921e+00 1.000000000000000000e+00 1.443607055664059999e+03 -1.207500000000000000e+02 4.875000000000000000e+01
3.000000000000000000e+00 7.511000000000010459e+02 4.398077392578119884e+02 2.862091064453120115e+00 9.999999776482580358e-03 1.176470637321469948e+00 2.369244873046880002e+03 1.758455514907840023e+00 1.000000000000000000e+00 1.883041870117190001e+03 -1.202500000000000000e+02 4.875000000000000000e+01
6.000000000000000000e+01 4.405615384615389871e+02 2.610590209960939774e+02 2.594360351562500000e+00 0.000000000000000000e+00 8.235294222831730515e-01 2.341595458984380002e+03 2.619682312011720082e+00 4.000000000000000000e+00 1.288154907226559999e+03 -1.197500000000000000e+02 4.875000000000000000e+01
5.100000000000000000e+01 3.476076923076919911e+02 2.215895996093750000e+02 2.324493408203120115e+00 0.000000000000000000e+00 5.882353186607359730e-01 2.303160888671880002e+03 2.609005689620969903e+00 4.000000000000000000e+00 1.150046020507809999e+03 -1.192500000000000000e+02 4.875000000000000000e+01
4.900000000000000000e+01 5.030000000000000000e+02 2.590060729980469887e+02 2.054626464843750000e+00 0.000000000000000000e+00 0.000000000000000000e+00 2.264726318359380002e+03 2.123017072677610084e+00 4.000000000000000000e+00 1.104523681640619998e+03 -1.187500000000000000e+02 4.875000000000000000e+01
6.900000000000000000e+01 6.607692307692309441e+02 2.777459411621089771e+02 1.784759521484380107e+00 0.000000000000000000e+00 7.647058963775630325e-01 2.226291748046880002e+03 2.129319906234739879e+00 4.000000000000000000e+00 1.156654541015619998e+03 -1.182500000000000000e+02 4.875000000000000000e+01
4.200000000000000000e+01 8.242999999999999545e+02 3.663892517089839771e+02 1.477020263671880107e+00 0.000000000000000000e+00 0.000000000000000000e+00 2.182819824218750000e+03 2.126241445541380060e+00 3.000000000000000000e+00 1.246336547851559999e+03 -1.177500000000000000e+02 4.875000000000000000e+01
6.500000000000000000e+01 9.999615384615379980e+02 5.226275024414060226e+02 1.156616210937500000e+00 0.000000000000000000e+00 0.000000000000000000e+00 2.137668701171880002e+03 2.033294677734379885e+00 4.000000000000000000e+00 1.452042724609380002e+03 -1.172500000000000000e+02 4.875000000000000000e+01
2.200000000000000000e+01 1.064515384615380071e+03 5.465998535156250000e+02 8.362426757812500000e-01 0.000000000000000000e+00 5.294117927551269531e-01 2.092517822265619998e+03 1.938321590423579988e+00 3.000000000000000000e+00 1.699368530273440001e+03 -1.167500000000000000e+02 4.875000000000000000e+01
4.600000000000000000e+01 7.849538461538460297e+02 5.226921386718750000e+02 5.158386230468750000e-01 0.000000000000000000e+00 1.117647051811220038e+00 2.047366699218750000e+03 2.000566959381099963e+00 4.000000000000000000e+00 8.384337158203120453e+02 -1.162500000000000000e+02 4.875000000000000000e+01
6.600000000000000000e+01 6.126846153846159950e+02 5.243575439453120453e+02 5.489501953125000000e-01 0.000000000000000000e+00 5.882352963089940157e-02 2.069486572265619998e+03 2.040585517883299893e+00 4.000000000000000000e+00 1.383650390625000000e+03 -1.157500000000000000e+02 4.875000000000000000e+01
4.600000000000000000e+01 5.439846153846159496e+02 4.578054199218750000e+02 5.820617675781250000e-01 0.000000000000000000e+00 1.176470592617989974e-01 2.091606445312500000e+03 2.014220952987670010e+00 4.000000000000000000e+00 1.557121215820309999e+03 -1.152500000000000000e+02 4.875000000000000000e+01
4.500000000000000000e+01 5.925615384615380208e+02 4.863578186035160229e+02 6.151428222656250000e-01 0.000000000000000000e+00 0.000000000000000000e+00 2.113726318359380002e+03 1.922215938568119897e+00 4.000000000000000000e+00 1.721737915039059999e+03 -1.147500000000000000e+02 4.875000000000000000e+01
2.800000000000000000e+01 6.407076923076930370e+02 4.652832641601560226e+02 7.115173339843750000e-01 0.000000000000000000e+00 1.176470637321469948e+00 2.149581787109380002e+03 1.805908799171449974e+00 3.000000000000000000e+00 1.177440673828119998e+03 -1.142500000000000000e+02 4.875000000000000000e+01
4.000000000000000000e+00 5.503538461538460069e+02 5.516752319335939774e+02 9.976196289062500000e-01 1.037164032459260005e-01 1.000000000000000000e+00 2.226644775390619998e+03 1.690569281578059968e+00 1.000000000000000000e+00 1.820497558593750000e+03 -1.137500000000000000e+02 4.875000000000000000e+01
6.000000000000000000e+00 3.873076923076919797e+02 3.940711975097660229e+02 1.283752441406250000e+00 0.000000000000000000e+00 7.647058963775630325e-01 2.303708007812500000e+03 2.316104412078860086e+00 1.000000000000000000e+00 1.528029541015619998e+03 -1.132500000000000000e+02 4.875000000000000000e+01
4.000000000000000000e+00 2.983615384615379753e+02 2.052739868164059942e+02 1.569885253906250000e+00 0.000000000000000000e+00 2.352941185235979948e-01 2.380770996093750000e+03 3.308897733688350051e+00 1.000000000000000000e+00 1.298169677734380002e+03 -1.127500000000000000e+02 4.875000000000000000e+01
8.000000000000000000e+00 2.631923076923080203e+02 1.227392349243159941e+02 1.932067871093750000e+00 0.000000000000000000e+00 2.352941185235979948e-01 2.479958984375000000e+03 3.468755960464480204e+00 1.000000000000000000e+00 1.211426879882809999e+03 -1.122500000000000000e+02 4.875000000000000000e+01
0.000000000000000000e+00 2.897461538461540158e+02 1.284112091064449999e+02 2.370361328125000000e+00 0.000000000000000000e+00 2.352941185235979948e-01 2.601272216796880002e+03 3.222095727920530006e+00 1.000000000000000000e+00 1.058584838867190001e+03 -1.117500000000000000e+02 4.875000000000000000e+01
1.000000000000000000e+00 3.325846153846150060e+02 1.314438018798830115e+02 2.808654785156250000e+00 0.000000000000000000e+00 0.000000000000000000e+00 2.722585449218750000e+03 2.227022171020510033e+00 1.000000000000000000e+00 1.168593872070309999e+03 -1.112500000000000000e+02 4.875000000000000000e+01
2.000000000000000000e+00 3.329153846153849940e+02 1.252124557495120030e+02 3.246917724609379885e+00 0.000000000000000000e+00 2.941176593303679865e-01 2.843898681640619998e+03 2.853993892669679955e+00 1.000000000000000000e+00 9.763755493164060226e+02 -1.107500000000000000e+02 4.875000000000000000e+01
0.000000000000000000e+00 3.172846153846149946e+02 1.349835968017580115e+02 3.557220458984379885e+00 0.000000000000000000e+00 5.294117927551269531e-01 2.940533203125000000e+03 1.911291599273680086e+00 1.000000000000000000e+00 8.416360473632810226e+02 -1.102500000000000000e+02 4.875000000000000000e+01
4.000000000000000000e+00 2.990000000000000000e+02 1.487409057617190058e+02 3.824829101562500000e+00 0.000000000000000000e+00 0.000000000000000000e+00 3.028941406250000000e+03 2.340686321258540037e+00 1.000000000000000000e+00 8.371827392578120453e+02 -1.097500000000000000e+02 4.875000000000000000e+01
3.000000000000000000e+00 3.386769230769230035e+02 1.600512695312500000e+02 4.092437744140619671e+00 0.000000000000000000e+00 0.000000000000000000e+00 3.117349853515619998e+03 3.611043930053710049e+00 1.000000000000000000e+00 7.822606811523439774e+02 -1.092500000000000000e+02 4.875000000000000000e+01
4.000000000000000000e+00 3.424384615384619792e+02 1.472906341552730112e+02 4.360046386718750000e+00 0.000000000000000000e+00 5.882353186607359730e-01 3.205758056640619998e+03 3.583749294281009856e+00 1.000000000000000000e+00 9.875421752929689774e+02 -1.087500000000000000e+02 4.875000000000000000e+01
3.000000000000000000e+00 3.110307692307690104e+02 1.376974639892580115e+02 4.274810791015619671e+00 0.000000000000000000e+00 9.411764740943909802e-01 3.216027587890619998e+03 3.600671529769900125e+00 1.000000000000000000e+00 8.658869628906250000e+02 -1.082500000000000000e+02 4.875000000000000000e+01
5.000000000000000000e+00 2.815461538461540272e+02 1.516606903076169885e+02 4.189575195312500000e+00 0.000000000000000000e+00 0.000000000000000000e+00 3.226297119140619998e+03 3.604114294052120027e+00 1.000000000000000000e+00 8.202000122070310226e+02 -1.077500000000000000e+02 4.875000000000000000e+01
3.000000000000000000e+00 2.816615384615390099e+02 1.727922515869140057e+02 4.104339599609380329e+00 0.000000000000000000e+00 0.000000000000000000e+00 3.236566650390619998e+03 3.587646007537840021e+00 1.000000000000000000e+00 7.718680419921879547e+02 -1.072500000000000000e+02 4.875000000000000000e+01
2.000000000000000000e+00 3.165307692307690104e+02 1.634359130859380116e+02 3.961883544921879885e+00 0.000000000000000000e+00 0.000000000000000000e+00 3.232805419921880002e+03 3.204023838043209782e+00 1.000000000000000000e+00 7.914791259765620453e+02 -1.067500000000000000e+02 4.875000000000000000e+01
0.000000000000000000e+00 3.544769230769230148e+02 1.559240722656250000e+02 3.647644042968750000e+00 0.000000000000000000e+00 4.117647111415860262e-01 3.186951660156250000e+03 3.517895936965940162e+00 1.000000000000000000e+00 9.127122192382810226e+02 -1.062500000000000000e+02 4.875000000000000000e+01
3.000000000000000000e+00 3.684307692307689877e+02 1.689968109130859943e+02 3.333404541015620115e+00 0.000000000000000000e+00 0.000000000000000000e+00 3.141097656250000000e+03 3.571486711502080080e+00 1.000000000000000000e+00 8.335678710937500000e+02 -1.057500000000000000e+02 4.875000000000000000e+01
7.400000000000000000e+01 2.516523076923080225e+03 5.947929077148439774e+02 6.210510253906250000e+00 0.000000000000000000e+00 0.000000000000000000e+00 2.736303466796880002e+03 2.151160955429079813e+00 4.000000000000000000e+00 5.131040649414060226e+02 -1.252500000000000000e+02 4.925000000000000000e+01
2.200000000000000000e+01 2.204084615384610061e+03 6.278273925781250000e+02 2.829895019531250000e+00 0.000000000000000000e+00 0.000000000000000000e+00 2.156440673828119998e+03 2.504439592361450195e+00 3.000000000000000000e+00 1.497533226013180041e+01 -1.227500000000000000e+02 4.925000000000000000e+01
5.500000000000000000e+01 2.097146153846149900e+03 6.271173706054689774e+02 2.515136718750000000e+00 0.000000000000000000e+00 0.000000000000000000e+00 2.140967529296880002e+03 2.397407054901119938e+00 4.000000000000000000e+00 2.465562744140619884e+02 -1.222500000000000000e+02 4.925000000000000000e+01
3.000000000000000000e+01 1.700561538461540067e+03 6.337731933593750000e+02 2.211822509765620115e+00 0.000000000000000000e+00 0.000000000000000000e+00 2.126057128906250000e+03 2.202403306961060014e+00 3.000000000000000000e+00 2.230149078369139914e+01 -1.217500000000000000e+02 4.925000000000000000e+01
6.000000000000000000e+01 1.192792307692310033e+03 6.278632202148439774e+02 1.942871093750000000e+00 0.000000000000000000e+00 2.857142857142859829e-02 2.112833984375000000e+03 1.920868277549740100e+00 4.000000000000000000e+00 1.355381713867190001e+03 -1.212500000000000000e+02 4.925000000000000000e+01
5.800000000000000000e+01 8.908692307692309669e+02 4.793365783691410229e+02 1.673919677734380107e+00 0.000000000000000000e+00 1.142857142857140046e-01 2.099610839843750000e+03 1.723192691802980070e+00 4.000000000000000000e+00 1.576401367187500000e+03 -1.207500000000000000e+02 4.925000000000000000e+01
5.900000000000000000e+01 6.787923076923079861e+02 3.102082214355469887e+02 1.404968261718750000e+00 9.999999776482580358e-03 5.882352963089940157e-02 2.086387939453119998e+03 1.732160091400150037e+00 4.000000000000000000e+00 1.724958862304690001e+03 -1.202500000000000000e+02 4.925000000000000000e+01
5.400000000000000000e+01 4.805538461538459956e+02 2.287917938232419885e+02 1.132995605468750000e+00 0.000000000000000000e+00 1.428571428571429880e-01 2.063425292968750000e+03 1.861624002456669924e+00 4.000000000000000000e+00 1.285924072265619998e+03 -1.197500000000000000e+02 4.925000000000000000e+01
5.700000000000000000e+01 5.408615384615379753e+02 2.220984802246090055e+02 8.580322265625000000e-01 0.000000000000000000e+00 5.294117927551269531e-01 2.030723754882809999e+03 1.916132688522339977e+00 4.000000000000000000e+00 1.644655395507809999e+03 -1.192500000000000000e+02 4.925000000000000000e+01
6.900000000000000000e+01 6.783999999999999773e+02 2.521509246826169885e+02 5.830993652343750000e-01 0.000000000000000000e+00 5.714285714285709944e-02 1.998021972656250000e+03 1.935051441192630062e+00 4.000000000000000000e+00 1.319899414062500000e+03 -1.187500000000000000e+02 4.925000000000000000e+01
4.800000000000000000e+01 8.647076923076920139e+02 2.406220550537109943e+02 3.081359863281250000e-01 0.000000000000000000e+00 0.000000000000000000e+00 1.965320312500000000e+03 1.955699324607850009e+00 4.000000000000000000e+00 1.235299072265619998e+03 -1.182500000000000000e+02 4.925000000000000000e+01
6.900000000000000000e+01 1.057684615384619974e+03 2.099703674316409945e+02 5.718994140625000000e-02 0.000000000000000000e+00 2.857142857142859829e-02 1.925743041992190001e+03 1.949599981307980068e+00 4.000000000000000000e+00 1.254394653320309999e+03 -1.177500000000000000e+02 4.925000000000000000e+01
7.500000000000000000e+01 1.158807692307690104e+03 3.573743286132810226e+02 -1.857299804687500000e-01 0.000000000000000000e+00 2.857142857142859829e-02 1.883874023437500000e+03 1.893910884857179955e+00 4.000000000000000000e+00 1.077968872070309999e+03 -1.172500000000000000e+02 4.925000000000000000e+01
7.300000000000000000e+01 1.163338461538460024e+03 4.133062133789060226e+02 -4.286499023437500000e-01 0.000000000000000000e+00 2.352941185235979948e-01 1.842004882812500000e+03 1.792010068893429953e+00 4.000000000000000000e+00 1.245673461914059999e+03 -1.167500000000000000e+02 4.925000000000000000e+01
4.600000000000000000e+01 8.708769230769220258e+02 3.836186218261719887e+02 -6.715698242187500000e-01 0.000000000000000000e+00 2.352941185235979948e-01 1.800135864257809999e+03 1.824011921882630061e+00 4.000000000000000000e+00 1.715379272460940001e+03 -1.162500000000000000e+02 4.925000000000000000e+01
5.100000000000000000e+01 5.903769230769230489e+02 4.612875671386719887e+02 -4.666748046875000000e-01 0.000000000000000000e+00 4.705882370471949905e-01 1.860409545898440001e+03 1.960814237594600051e+00 4.000000000000000000e+00 1.631804687500000000e+03 -1.157500000000000000e+02 4.925000000000000000e+01
4.300000000000000000e+01 6.116615384615389530e+02 4.903478698730469887e+02 -2.617797851562500000e-01 0.000000000000000000e+00 4.705882370471949905e-01 1.920683227539059999e+03 1.991820931434630015e+00 3.000000000000000000e+00 7.784222412109379547e+02 -1.152500000000000000e+02 4.925000000000000000e+01
5.500000000000000000e+01 6.621307692307690331e+02 5.624672241210939774e+02 -5.688476562500000000e-02 9.999999776482580358e-03 2.352941185235979948e-01 1.980956909179690001e+03 1.830621242523190029e+00 4.000000000000000000e+00 1.867376831054690001e+03 -1.147500000000000000e+02 4.925000000000000000e+01
4.000000000000000000e+01 6.636000000000000227e+02 4.905943298339839771e+02 1.897583007812500000e-01 0.000000000000000000e+00 5.882353186607359730e-01 2.050075927734380002e+03 2.126776456832890183e+00 3.000000000000000000e+00 1.806257812500000000e+03 -1.142500000000000000e+02 4.925000000000000000e+01
6.000000000000000000e+00 4.193153846153850282e+02 2.639287719726560226e+02 9.336242675781250000e-01 0.000000000000000000e+00 0.000000000000000000e+00 2.241386718750000000e+03 3.158167362213129881e+00 1.000000000000000000e+00 1.122803833007809999e+03 -1.132500000000000000e+02 4.925000000000000000e+01
1.400000000000000000e+01 3.328846153846150173e+02 1.906021270751949999e+02 1.305572509765619893e+00 0.000000000000000000e+00 0.000000000000000000e+00 2.337041992187500000e+03 2.544607639312740144e+00 1.000000000000000000e+00 1.249766235351559999e+03 -1.127500000000000000e+02 4.925000000000000000e+01
5.000000000000000000e+00 2.924230769230770193e+02 1.597720031738280113e+02 1.708953857421880107e+00 0.000000000000000000e+00 0.000000000000000000e+00 2.445398193359380002e+03 3.496264934539790037e+00 1.000000000000000000e+00 1.045463989257809999e+03 -1.122500000000000000e+02 4.925000000000000000e+01
0.000000000000000000e+00 2.812153846153850054e+02 1.537418212890619884e+02 2.143859863281250000e+00 0.000000000000000000e+00 1.058823585510249909e+00 2.566455566406250000e+03 3.581105947494509945e+00 1.000000000000000000e+00 9.253961181640620453e+02 -1.117500000000000000e+02 4.925000000000000000e+01
1.000000000000000000e+00 3.186999999999999886e+02 1.517588806152340055e+02 2.578735351562500000e+00 0.000000000000000000e+00 1.235294103622440076e+00 2.687512939453119998e+03 3.624828577041629973e+00 1.000000000000000000e+00 9.303930053710939774e+02 -1.112500000000000000e+02 4.925000000000000000e+01
5.000000000000000000e+00 3.248076923076919797e+02 1.425141754150390057e+02 3.013610839843750000e+00 0.000000000000000000e+00 2.352941185235979948e-01 2.808570312500000000e+03 3.587942600250240144e+00 1.000000000000000000e+00 8.799439697265620453e+02 -1.107500000000000000e+02 4.925000000000000000e+01
4.000000000000000000e+00 3.142384615384619906e+02 1.528847503662109943e+02 3.282257080078120115e+00 0.000000000000000000e+00 0.000000000000000000e+00 2.896389160156250000e+03 3.480559825897219905e+00 1.000000000000000000e+00 9.763619384765620453e+02 -1.102500000000000000e+02 4.925000000000000000e+01
1.000000000000000000e+00 3.169846153846149832e+02 1.870537567138669885e+02 3.495483398437500000e+00 0.000000000000000000e+00 0.000000000000000000e+00 2.973128173828119998e+03 3.441937208175660068e+00 1.000000000000000000e+00 9.729649658203120453e+02 -1.097500000000000000e+02 4.925000000000000000e+01
4.000000000000000000e+00 3.480153846153850168e+02 1.795344696044919885e+02 3.708679199218750000e+00 0.000000000000000000e+00 0.000000000000000000e+00 3.049867431640619998e+03 3.420085430145260119e+00 1.000000000000000000e+00 9.762777709960939774e+02 -1.092500000000000000e+02 4.925000000000000000e+01
4.000000000000000000e+00 3.562615384615380094e+02 1.488857727050780113e+02 3.921905517578120115e+00 0.000000000000000000e+00 3.529411852359770063e-01 3.126606689453119998e+03 3.439935445785519796e+00 1.000000000000000000e+00 9.189846801757810226e+02 -1.087500000000000000e+02 4.925000000000000000e+01
2.000000000000000000e+00 3.204230769230770193e+02 1.472461395263669885e+02 3.791625976562500000e+00 0.000000000000000000e+00 5.882352963089940157e-02 3.128061279296880002e+03 3.463482856750490058e+00 1.000000000000000000e+00 9.479498901367189774e+02 -1.082500000000000000e+02 4.925000000000000000e+01
7.000000000000000000e+00 2.830692307692310123e+02 1.681241607666019888e+02 3.661315917968750000e+00 0.000000000000000000e+00 8.571428571428570120e-02 3.129515869140619998e+03 3.463948726654050070e+00 1.000000000000000000e+00 8.009554443359379547e+02 -1.077500000000000000e+02 4.925000000000000000e+01
6.000000000000000000e+00 2.997615384615389758e+02 2.029603271484380116e+02 3.531036376953120115e+00 0.000000000000000000e+00 8.571428571428570120e-02 3.130970703125000000e+03 3.438523530960079899e+00 1.000000000000000000e+00 9.338153686523439774e+02 -1.072500000000000000e+02 4.925000000000000000e+01
2.000000000000000000e+01 3.333307692307690218e+02 1.858491363525390057e+02 3.353637695312500000e+00 0.000000000000000000e+00 0.000000000000000000e+00 3.120537353515619998e+03 2.690616607666020066e+00 3.000000000000000000e+00 9.353649902343750000e+02 -1.067500000000000000e+02 4.925000000000000000e+01
5.000000000000000000e+00 3.595000000000000000e+02 1.806683197021480112e+02 3.034881591796879885e+00 0.000000000000000000e+00 2.857142857142859829e-02 3.074440673828119998e+03 3.483067035675050160e+00 1.000000000000000000e+00 9.630839843750000000e+02 -1.062500000000000000e+02 4.925000000000000000e+01
1.000000000000000000e+00 3.770461538461540272e+02 1.949505615234380116e+02 2.716156005859379885e+00 0.000000000000000000e+00 0.000000000000000000e+00 3.028343750000000000e+03 3.512626647949220082e+00 1.000000000000000000e+00 8.517586669921879547e+02 -1.057500000000000000e+02 4.925000000000000000e+01
5.000000000000000000e+00 3.857307692307689990e+02 2.350940856933590055e+02 2.397399902343750000e+00 0.000000000000000000e+00 0.000000000000000000e+00 2.982246826171880002e+03 3.501927375793460140e+00 1.000000000000000000e+00 7.306081542968750000e+02 -1.052500000000000000e+02 4.925000000000000000e+01
3.200000000000000000e+01 2.942007692307689922e+03 6.673110351562500000e+02 6.458679199218750000e+00 0.000000000000000000e+00 0.000000000000000000e+00 2.722488525390619998e+03 2.170758008956910068e+00 3.000000000000000000e+00 5.942215576171879547e+02 -1.262500000000000000e+02 4.975000000000000000e+01
5.000000000000000000e+01 2.559846153846150173e+03 6.338645019531250000e+02 5.743194580078119671e+00 0.000000000000000000e+00 2.857142857142859829e-02 2.550456054687500000e+03 2.007924556732179955e+00 4.000000000000000000e+00 1.009400939941410002e+03 -1.257500000000000000e+02 4.975000000000000000e+01
6.400000000000000000e+01 2.239315384615380026e+03 6.496173095703120453e+02 1.268157958984380107e+00 0.000000000000000000e+00 2.352941185235979948e-01 1.684032836914059999e+03 1.996050596237179953e+00 4.000000000000000000e+00 1.203685058593750000e+03 -1.232500000000000000e+02 4.975000000000000000e+01
6.900000000000000000e+01 2.013330769230770102e+03 6.548679809570310226e+02 1.109802246093750000e+00 0.000000000000000000e+00 0.000000000000000000e+00 1.738810668945309999e+03 1.875937461853030008e+00 4.000000000000000000e+00 8.625964355468750000e+02 -1.227500000000000000e+02 4.975000000000000000e+01
6.000000000000000000e+01 1.742376923076920093e+03 6.325602416992189774e+02 9.514770507812500000e-01 0.000000000000000000e+00 2.857142857142859829e-02 1.793588500976559999e+03 1.975916266441350100e+00 4.000000000000000000e+00 5.285336914062500000e+02 -1.222500000000000000e+02 4.975000000000000000e+01
5.400000000000000000e+01 1.265061538461540067e+03 6.025198974609379547e+02 7.646789550781250000e-01 0.000000000000000000e+00 8.571428571428570120e-02 1.832276367187500000e+03 2.001744747161870119e+00 4.000000000000000000e+00 1.455017333984380002e+03 -1.217500000000000000e+02 4.975000000000000000e+01
5.300000000000000000e+01 8.490230769230770420e+02 5.791218261718750000e+02 4.923706054687500000e-01 0.000000000000000000e+00 5.294117927551269531e-01 1.822694580078119998e+03 1.963298082351679907e+00 4.000000000000000000e+00 1.258062011718750000e+03 -1.212500000000000000e+02 4.975000000000000000e+01
5.100000000000000000e+01 5.830384615384609788e+02 3.827098083496089771e+02 2.200927734375000000e-01 0.000000000000000000e+00 5.882353186607359730e-01 1.813112670898440001e+03 1.880426645278929998e+00 4.000000000000000000e+00 1.096753784179690001e+03 -1.207500000000000000e+02 4.975000000000000000e+01
2.000000000000000000e+01 5.755461538461539703e+02 1.712902526855469887e+02 -5.218505859375000000e-02 0.000000000000000000e+00 5.714285714285709944e-02 1.803530761718750000e+03 1.849175333976750046e+00 3.000000000000000000e+00 1.386848754882809999e+03 -1.202500000000000000e+02 4.975000000000000000e+01
5.300000000000000000e+01 6.648769230769230489e+02 2.196096038818359943e+02 -6.083984375000000000e-01 0.000000000000000000e+00 7.647058963775630325e-01 1.758286499023440001e+03 1.858331799507140003e+00 4.000000000000000000e+00 1.409815551757809999e+03 -1.192500000000000000e+02 4.975000000000000000e+01
4.000000000000000000e+01 8.916307692307700563e+02 2.893160095214839771e+02 -8.884582519531250000e-01 0.000000000000000000e+00 5.294117927551269531e-01 1.731317749023440001e+03 1.796970009803769974e+00 3.000000000000000000e+00 1.217687500000000000e+03 -1.187500000000000000e+02 4.975000000000000000e+01
4.800000000000000000e+01 1.072330769230770102e+03 3.238866577148439774e+02 -1.168487548828119893e+00 0.000000000000000000e+00 2.857142857142859829e-02 1.704348876953119998e+03 1.786870121955870028e+00 4.000000000000000000e+00 1.310779541015619998e+03 -1.182500000000000000e+02 4.975000000000000000e+01
8.000000000000000000e+00 1.248592307692309987e+03 2.924648742675780113e+02 -1.362609863281250000e+00 1.353950351476669867e-01 2.352941185235979948e-01 1.668666259765619998e+03 1.773384690284729892e+00 1.000000000000000000e+00 1.635295776367190001e+03 -1.177500000000000000e+02 4.975000000000000000e+01
7.000000000000000000e+00 1.244538461538460069e+03 3.373269042968750000e+02 -1.528045654296880107e+00 9.999999776482580358e-03 5.294117927551269531e-01 1.630079223632809999e+03 1.726416230201720081e+00 1.000000000000000000e+00 1.939585571289059999e+03 -1.172500000000000000e+02 4.975000000000000000e+01
1.600000000000000000e+01 1.213769230769230035e+03 3.495812072753910229e+02 -1.693511962890619893e+00 1.515055745840070134e-01 1.428571428571429880e-01 1.591492187500000000e+03 1.583306789398190029e+00 1.000000000000000000e+00 1.848745849609380002e+03 -1.167500000000000000e+02 4.975000000000000000e+01
1.900000000000000000e+01 5.814692307692309896e+02 2.438807830810550001e+02 -1.482269287109380107e+00 0.000000000000000000e+00 2.352941185235979948e-01 1.651332519531250000e+03 1.825410604476930043e+00 1.000000000000000000e+00 8.267398071289060226e+02 -1.157500000000000000e+02 4.975000000000000000e+01
4.800000000000000000e+01 7.085615384615380208e+02 3.125763854980469887e+02 -1.105590820312500000e+00 0.000000000000000000e+00 5.714285714285709944e-02 1.749760131835940001e+03 1.686872363090520022e+00 4.000000000000000000e+00 1.682000000000000000e+03 -1.152500000000000000e+02 4.975000000000000000e+01
5.700000000000000000e+01 6.192307692307690559e+02 3.693641357421880116e+02 -7.289123535156250000e-01 9.999999776482580358e-03 4.705882370471949905e-01 1.848187622070309999e+03 1.695163369178769974e+00 4.000000000000000000e+00 1.624541015625000000e+03 -1.147500000000000000e+02 4.975000000000000000e+01
5.000000000000000000e+00 5.549769230769229580e+02 3.109126586914060226e+02 -3.319702148437500000e-01 0.000000000000000000e+00 2.857142857142859829e-02 1.950570190429690001e+03 1.748887896537780096e+00 1.000000000000000000e+00 1.507592773437500000e+03 -1.142500000000000000e+02 4.975000000000000000e+01
8.000000000000000000e+00 4.150615384615389871e+02 2.784004821777339771e+02 1.257629394531250000e-01 0.000000000000000000e+00 2.352941185235979948e-01 2.064817871093750000e+03 8.563712835311889648e-01 1.000000000000000000e+00 1.302974975585940001e+03 -1.137500000000000000e+02 4.975000000000000000e+01
4.000000000000000000e+00 3.538461538461539817e+02 2.177450714111330115e+02 5.834960937500000000e-01 0.000000000000000000e+00 6.470588445663449928e-01 2.179065429687500000e+03 1.664642095565799895e+00 1.000000000000000000e+00 9.436068725585939774e+02 -1.132500000000000000e+02 4.975000000000000000e+01
4.000000000000000000e+00 2.984692307692309896e+02 1.621709136962890057e+02 1.485839843750000000e+00 0.000000000000000000e+00 2.941176593303679865e-01 2.410837402343750000e+03 3.593159675598140090e+00 1.000000000000000000e+00 8.275535278320310226e+02 -1.122500000000000000e+02 4.975000000000000000e+01
6.000000000000000000e+00 2.866769230769230035e+02 1.410528717041019888e+02 1.917327880859380107e+00 0.000000000000000000e+00 8.823529481887819603e-01 2.531638916015619998e+03 3.633001804351810193e+00 1.000000000000000000e+00 8.178747558593750000e+02 -1.117500000000000000e+02 4.975000000000000000e+01
0.000000000000000000e+00 3.018230769230769965e+02 1.297839355468750000e+02 2.348815917968750000e+00 0.000000000000000000e+00 1.352941155433649900e+00 2.652440429687500000e+03 3.647546052932740146e+00 1.000000000000000000e+00 8.438831176757810226e+02 -1.112500000000000000e+02 4.975000000000000000e+01
5.000000000000000000e+00 3.116923076923080203e+02 1.367976989746090055e+02 2.780273437500000000e+00 0.000000000000000000e+00 5.882353186607359730e-01 2.773241943359380002e+03 3.564477920532230115e+00 1.000000000000000000e+00 9.314620361328120453e+02 -1.107500000000000000e+02 4.975000000000000000e+01
3.000000000000000000e+00 3.271846153846149718e+02 1.733813323974609943e+02 3.007293701171879885e+00 0.000000000000000000e+00 2.941176593303679865e-01 2.852244873046880002e+03 3.424832582473749998e+00 1.000000000000000000e+00 1.084347900390619998e+03 -1.102500000000000000e+02 4.975000000000000000e+01
6.000000000000000000e+00 3.508384615384620133e+02 2.418074493408199999e+02 3.166107177734379885e+00 0.000000000000000000e+00 7.647058963775630325e-01 2.917314941406250000e+03 3.369944810867310014e+00 1.000000000000000000e+00 9.389586181640620453e+02 -1.097500000000000000e+02 4.975000000000000000e+01
3.100000000000000000e+01 3.941923076923080203e+02 2.399784393310550001e+02 3.324951171875000000e+00 0.000000000000000000e+00 2.857142857142859829e-02 2.982385009765619998e+03 3.334865331649779829e+00 3.000000000000000000e+00 1.149253417968750000e+03 -1.092500000000000000e+02 4.975000000000000000e+01
3.000000000000000000e+00 3.973230769230769965e+02 1.776972351074219887e+02 3.483795166015620115e+00 0.000000000000000000e+00 2.352941185235979948e-01 3.047455078125000000e+03 3.339566230773929778e+00 1.000000000000000000e+00 1.056739746093750000e+03 -1.087500000000000000e+02 4.975000000000000000e+01
0.000000000000000000e+00 3.530384615384620020e+02 1.554290924072269888e+02 3.308441162109379885e+00 0.000000000000000000e+00 0.000000000000000000e+00 3.040094970703119998e+03 3.380276679992679778e+00 1.000000000000000000e+00 9.110614624023439774e+02 -1.082500000000000000e+02 4.975000000000000000e+01
4.000000000000000000e+00 3.001846153846149718e+02 1.657213134765619884e+02 3.133087158203120115e+00 0.000000000000000000e+00 2.857142857142859829e-02 3.032734863281250000e+03 3.434383869171139914e+00 1.000000000000000000e+00 7.974722900390620453e+02 -1.077500000000000000e+02 4.975000000000000000e+01
1.000000000000000000e+00 3.431307692307689763e+02 1.892990722656250000e+02 2.745391845703120115e+00 0.000000000000000000e+00 0.000000000000000000e+00 3.008269531250000000e+03 3.503910541534419831e+00 1.000000000000000000e+00 7.530905761718750000e+02 -1.067500000000000000e+02 4.975000000000000000e+01
1.000000000000000000e+00 3.610769230769229807e+02 1.895960845947269888e+02 2.098876953125000000e+00 0.000000000000000000e+00 0.000000000000000000e+00 2.915589843750000000e+03 3.494707345962519973e+00 1.000000000000000000e+00 6.831687011718750000e+02 -1.057500000000000000e+02 4.975000000000000000e+01
4.000000000000000000e+01 4.574692307692309896e+02 2.271932830810550001e+02 8.385009765625000000e-01 0.000000000000000000e+00 0.000000000000000000e+00 2.745104980468750000e+03 3.424227237701420012e+00 3.000000000000000000e+00 7.370426635742189774e+02 -1.022500000000000000e+02 4.975000000000000000e+01
7.300000000000000000e+01 2.870369230769229944e+03 6.148876342773439774e+02 6.150512695312500000e+00 0.000000000000000000e+00 2.857142857142859829e-02 2.578260253906250000e+03 2.173938989639280006e+00 4.000000000000000000e+00 2.432498931884769888e+02 -1.267500000000000000e+02 5.025000000000000000e+01
7.400000000000000000e+01 2.640715384615380117e+03 5.950632934570310226e+02 5.297119140625000000e+00 0.000000000000000000e+00 0.000000000000000000e+00 2.384083740234380002e+03 2.148564100265499821e+00 4.000000000000000000e+00 9.570910644531250000e+02 -1.262500000000000000e+02 5.025000000000000000e+01
5.200000000000000000e+01 2.327615384615380208e+03 5.559967041015620453e+02 4.443695068359380329e+00 0.000000000000000000e+00 2.352941185235979948e-01 2.189907470703119998e+03 2.292443752288820136e+00 4.000000000000000000e+00 3.028094177246089771e+02 -1.257500000000000000e+02 5.025000000000000000e+01
1.000000000000000000e+01 1.470930769230770011e+03 5.266267700195310226e+02 6.833496093750000000e-01 0.000000000000000000e+00 0.000000000000000000e+00 1.356520629882809999e+03 2.041276931762700197e+00 1.000000000000000000e+00 9.905062866210939774e+02 -1.242500000000000000e+02 5.025000000000000000e+01
3.200000000000000000e+01 1.527446153846150082e+03 6.423146362304689774e+02 -6.083679199218750000e-01 9.999999776482580358e-03 2.857142857142859829e-02 1.196151977539059999e+03 1.563995480537410110e+00 3.000000000000000000e+00 1.764387329101559999e+03 -1.232500000000000000e+02 5.025000000000000000e+01
6.900000000000000000e+01 1.365423076923080089e+03 6.063610229492189774e+02 -6.102600097656250000e-01 0.000000000000000000e+00 5.294117927551269531e-01 1.321180664062500000e+03 1.642556309700009987e+00 4.000000000000000000e+00 1.657941040039059999e+03 -1.227500000000000000e+02 5.025000000000000000e+01
1.100000000000000000e+01 1.183299999999999955e+03 5.178111572265620453e+02 -6.121826171875000000e-01 9.999999776482580358e-03 8.571428571428570120e-02 1.446209350585940001e+03 1.654390335083010033e+00 1.000000000000000000e+00 1.736146972656250000e+03 -1.222500000000000000e+02 5.025000000000000000e+01
1.100000000000000000e+01 8.526692307692310351e+02 3.330796203613280113e+02 -6.824951171875000000e-01 9.999999776482580358e-03 7.647058963775630325e-01 1.538495605468750000e+03 1.785048365592960096e+00 1.000000000000000000e+00 1.563198242187500000e+03 -1.217500000000000000e+02 5.025000000000000000e+01
3.100000000000000000e+01 4.935076923076920252e+02 3.199373779296880116e+02 -9.580993652343750000e-01 0.000000000000000000e+00 1.000000000000000000e+00 1.532555053710940001e+03 1.944698810577389914e+00 3.000000000000000000e+00 1.152114257812500000e+03 -1.212500000000000000e+02 5.025000000000000000e+01
5.700000000000000000e+01 4.077384615384610242e+02 2.626076354980469887e+02 -1.233703613281250000e+00 0.000000000000000000e+00 5.714285714285709944e-02 1.526614379882809999e+03 1.957157492637630058e+00 4.000000000000000000e+00 1.383616088867190001e+03 -1.207500000000000000e+02 5.025000000000000000e+01
5.100000000000000000e+01 4.023923076923080089e+02 1.543791351318359943e+02 -1.509338378906250000e+00 0.000000000000000000e+00 2.857142857142859829e-02 1.520673706054690001e+03 1.969943642616269974e+00 4.000000000000000000e+00 1.267306762695309999e+03 -1.202500000000000000e+02 5.025000000000000000e+01
6.600000000000000000e+01 5.856538461538469846e+02 1.844733123779300001e+02 -1.789703369140619893e+00 9.999999776482580358e-03 1.428571428571429880e-01 1.507085449218750000e+03 2.006231546401980204e+00 4.000000000000000000e+00 1.507128662109380002e+03 -1.197500000000000000e+02 5.025000000000000000e+01
1.200000000000000000e+01 4.914384615384610129e+02 2.316369018554690058e+02 -2.074859619140620115e+00 0.000000000000000000e+00 5.294117927551269531e-01 1.485849365234380002e+03 2.165812730789180129e+00 1.000000000000000000e+00 4.548609008789060226e+02 -1.192500000000000000e+02 5.025000000000000000e+01
5.500000000000000000e+01 7.797769230769230262e+02 3.437623596191410229e+02 -2.359985351562500000e+00 0.000000000000000000e+00 3.529411852359770063e-01 1.464613403320309999e+03 2.033807754516599786e+00 4.000000000000000000e+00 9.100161743164060226e+02 -1.187500000000000000e+02 5.025000000000000000e+01
3.000000000000000000e+01 1.172892307692309942e+03 4.666668395996089771e+02 -2.645141601562500000e+00 9.999999776482580358e-03 2.352941185235979948e-01 1.443377319335940001e+03 1.874020218849179908e+00 3.000000000000000000e+00 1.913094116210940001e+03 -1.182500000000000000e+02 5.025000000000000000e+01
7.800000000000000000e+01 1.201153846153850054e+03 5.088426818847660229e+02 -2.782409667968750000e+00 0.000000000000000000e+00 5.882353186607359730e-01 1.411589599609380002e+03 1.847207665443419966e+00 4.000000000000000000e+00 8.480570678710939774e+02 -1.177500000000000000e+02 5.025000000000000000e+01
3.400000000000000000e+01 5.995846153846149491e+02 2.821731872558589771e+02 -2.497894287109379885e+00 0.000000000000000000e+00 2.285714285714290084e-01 1.442255615234380002e+03 1.674481749534610042e+00 3.000000000000000000e+00 1.626828979492190001e+03 -1.157500000000000000e+02 5.025000000000000000e+01
5.100000000000000000e+01 7.331615384615380435e+02 2.729412536621089771e+02 -1.949401855468750000e+00 9.999999776482580358e-03 3.529411852359770063e-01 1.578836914062500000e+03 1.487687706947329991e+00 4.000000000000000000e+00 1.581397583007809999e+03 -1.152500000000000000e+02 5.025000000000000000e+01
6.000000000000000000e+00 3.870307692307690104e+02 2.203166656494140057e+02 -3.101501464843750000e-01 0.000000000000000000e+00 0.000000000000000000e+00 1.983904174804690001e+03 8.540944457054140404e-01 1.000000000000000000e+00 1.070752929687500000e+03 -1.137500000000000000e+02 5.025000000000000000e+01
1.000000000000000000e+00 3.458384615384620133e+02 2.014285583496090055e+02 2.333984375000000000e-01 0.000000000000000000e+00 0.000000000000000000e+00 2.116744140625000000e+03 2.910062551498409977e+00 1.000000000000000000e+00 9.763724975585939774e+02 -1.132500000000000000e+02 5.025000000000000000e+01
0.000000000000000000e+00 3.328153846153850282e+02 1.608422088623050001e+02 7.769470214843750000e-01 0.000000000000000000e+00 0.000000000000000000e+00 2.249583984375000000e+03 3.510157108306879881e+00 1.000000000000000000e+00 8.917919311523439774e+02 -1.127500000000000000e+02 5.025000000000000000e+01
4.000000000000000000e+00 3.021846153846149718e+02 1.351884765625000000e+02 1.262756347656250000e+00 0.000000000000000000e+00 2.352941185235979948e-01 2.376276855468750000e+03 3.549906015396119940e+00 1.000000000000000000e+00 7.724171142578120453e+02 -1.122500000000000000e+02 5.025000000000000000e+01
2.000000000000000000e+00 2.855307692307690104e+02 1.086262207031250000e+02 2.118896484375000000e+00 0.000000000000000000e+00 2.352941185235979948e-01 2.617368164062500000e+03 3.623906850814819780e+00 1.000000000000000000e+00 7.539991455078120453e+02 -1.112500000000000000e+02 5.025000000000000000e+01
0.000000000000000000e+00 2.888538461538460069e+02 1.252982635498050001e+02 2.546966552734379885e+00 0.000000000000000000e+00 1.588235259056089976e+00 2.737913818359380002e+03 3.601275205612179953e+00 1.000000000000000000e+00 7.151439819335939774e+02 -1.107500000000000000e+02 5.025000000000000000e+01
1.000000000000000000e+00 2.987461538461540158e+02 1.517259521484380116e+02 2.732330322265620115e+00 0.000000000000000000e+00 5.294117927551269531e-01 2.808100830078119998e+03 3.556640386581420010e+00 1.000000000000000000e+00 7.912818603515620453e+02 -1.102500000000000000e+02 5.025000000000000000e+01
1.000000000000000000e+00 3.231000000000000227e+02 1.848735198974609943e+02 2.836761474609379885e+00 0.000000000000000000e+00 2.857142857142859829e-02 2.861501708984380002e+03 3.540634393692020154e+00 1.000000000000000000e+00 7.541359252929689774e+02 -1.097500000000000000e+02 5.025000000000000000e+01
4.000000000000000000e+00 3.402846153846160178e+02 2.012303466796880116e+02 2.941223144531250000e+00 0.000000000000000000e+00 5.882352963089940157e-02 2.914902832031250000e+03 3.534353494644169924e+00 1.000000000000000000e+00 7.150734863281250000e+02 -1.092500000000000000e+02 5.025000000000000000e+01
4.000000000000000000e+00 3.160153846153850168e+02 1.694391784667969887e+02 2.825256347656250000e+00 0.000000000000000000e+00 0.000000000000000000e+00 2.952128662109380002e+03 3.486744642257689986e+00 1.000000000000000000e+00 7.530700683593750000e+02 -1.082500000000000000e+02 5.025000000000000000e+01
5.000000000000000000e+00 3.318692307692310237e+02 1.838915405273440058e+02 2.384399414062500000e+00 0.000000000000000000e+00 0.000000000000000000e+00 2.919778564453119998e+03 3.495410442352290037e+00 1.000000000000000000e+00 7.526983032226560226e+02 -1.072500000000000000e+02 5.025000000000000000e+01
5.000000000000000000e+00 3.369769230769230148e+02 1.835867462158199999e+02 2.137145996093750000e+00 0.000000000000000000e+00 0.000000000000000000e+00 2.896001708984380002e+03 3.509970664978030008e+00 1.000000000000000000e+00 7.228624877929689774e+02 -1.067500000000000000e+02 5.025000000000000000e+01
3.000000000000000000e+00 5.000538461538459956e+02 2.570056457519530113e+02 6.040649414062500000e-01 0.000000000000000000e+00 2.117647171020510033e+00 2.694002929687500000e+03 3.283920526504520154e+00 1.000000000000000000e+00 5.795292358398439774e+02 -1.002500000000000000e+02 5.025000000000000000e+01
4.800000000000000000e+01 1.905692307692309896e+03 4.509435729980469887e+02 3.374053955078120115e+00 0.000000000000000000e+00 2.352941185235979948e-01 1.935531005859380002e+03 2.041269302368160066e+00 4.000000000000000000e+00 7.003946533203120453e+02 -1.257500000000000000e+02 5.075000000000000000e+01
1.900000000000000000e+01 1.594369230769229944e+03 4.579452209472660229e+02 2.234832763671879885e+00 0.000000000000000000e+00 2.857142857142859829e-02 1.691559692382809999e+03 1.827320694923399991e+00 1.000000000000000000e+00 1.186470336914059999e+03 -1.252500000000000000e+02 5.075000000000000000e+01
0.000000000000000000e+00 1.288292307692310033e+03 4.806287536621089771e+02 9.948730468750000000e-01 9.999999776482580358e-03 2.857142857142859829e-02 1.423885253906250000e+03 1.839478492736819959e+00 1.000000000000000000e+00 1.585523681640619998e+03 -1.247500000000000000e+02 5.075000000000000000e+01
6.000000000000000000e+00 1.111653846153850054e+03 5.941304321289060226e+02 -1.468261718750000000e+00 0.000000000000000000e+00 2.285714285714290084e-01 1.019029113769529999e+03 1.257511377334590064e+00 1.000000000000000000e+00 1.947363281250000000e+03 -1.232500000000000000e+02 5.075000000000000000e+01
2.000000000000000000e+00 8.248076923076920366e+02 5.257600708007810226e+02 -1.451507568359380107e+00 0.000000000000000000e+00 5.882353186607359730e-01 1.149521728515619998e+03 1.668467640876770020e+00 1.000000000000000000e+00 1.812723876953119998e+03 -1.227500000000000000e+02 5.075000000000000000e+01
3.400000000000000000e+01 7.858461538461540385e+02 4.073132019042969887e+02 -1.434783935546880107e+00 0.000000000000000000e+00 6.470588445663449928e-01 1.280014404296880002e+03 1.721846342086789994e+00 3.000000000000000000e+00 9.251932983398439774e+02 -1.222500000000000000e+02 5.075000000000000000e+01
5.900000000000000000e+01 5.065076923076929916e+02 2.774731750488280113e+02 -1.498809814453119893e+00 1.406033337116240067e-01 3.428571428571430268e-01 1.372935668945309999e+03 1.856443405151370074e+00 4.000000000000000000e+00 1.782346801757809999e+03 -1.217500000000000000e+02 5.075000000000000000e+01
2.000000000000000000e+00 3.453692307692310237e+02 2.442580871582030113e+02 -1.805236816406250000e+00 0.000000000000000000e+00 5.882352963089940157e-02 1.353142578125000000e+03 2.000236511230470082e+00 1.000000000000000000e+00 4.567500915527339771e+02 -1.212500000000000000e+02 5.075000000000000000e+01
3.800000000000000000e+01 4.010846153846150060e+02 1.490482635498050001e+02 -2.418060302734379885e+00 0.000000000000000000e+00 2.352941185235979948e-01 1.313556640625000000e+03 2.082827806472780097e+00 3.000000000000000000e+00 7.994185180664060226e+02 -1.202500000000000000e+02 5.075000000000000000e+01
2.300000000000000000e+01 5.994384615384619792e+02 1.957810363769530113e+02 -2.695922851562500000e+00 0.000000000000000000e+00 7.058823704719540126e-01 1.297072875976559999e+03 2.057859659194949842e+00 3.000000000000000000e+00 5.162697753906250000e+02 -1.197500000000000000e+02 5.075000000000000000e+01
6.000000000000000000e+01 1.000984615384620042e+03 4.138882446289060226e+02 -3.194488525390620115e+00 0.000000000000000000e+00 2.352941185235979948e-01 1.270723754882809999e+03 2.002580642700200197e+00 4.000000000000000000e+00 1.184969482421880002e+03 -1.187500000000000000e+02 5.075000000000000000e+01
5.700000000000000000e+01 1.353630769230770056e+03 5.768646240234379547e+02 -3.493255615234379885e+00 0.000000000000000000e+00 2.000000000000000111e-01 1.246700805664059999e+03 1.769025087356570047e+00 4.000000000000000000e+00 7.742891845703120453e+02 -1.177500000000000000e+02 5.075000000000000000e+01
3.300000000000000000e+01 1.348661538461539976e+03 5.826194458007810226e+02 -3.476165771484379885e+00 2.286592274904249988e-01 2.000000000000000111e-01 1.236627929687500000e+03 1.554982423782349965e+00 3.000000000000000000e+00 1.534231323242190001e+03 -1.172500000000000000e+02 5.075000000000000000e+01
6.700000000000000000e+01 6.419538461538460297e+02 2.671477050781250000e+02 -1.672760009765619893e+00 1.069910526275630047e-01 2.857142857142859829e-02 1.656239746093750000e+03 1.497767448425290082e+00 4.000000000000000000e+00 1.791572998046880002e+03 -1.147500000000000000e+02 5.075000000000000000e+01
3.000000000000000000e+00 3.727923076923079861e+02 2.049811706542969887e+02 -5.255126953125000000e-01 0.000000000000000000e+00 0.000000000000000000e+00 1.939311523437500000e+03 1.959843993186950017e+00 1.000000000000000000e+00 1.080350830078119998e+03 -1.137500000000000000e+02 5.075000000000000000e+01
1.000000000000000000e+00 3.451153846153849827e+02 1.582876434326169885e+02 6.023864746093750000e-01 0.000000000000000000e+00 0.000000000000000000e+00 2.216323242187500000e+03 3.453091859817499998e+00 1.000000000000000000e+00 8.386262817382810226e+02 -1.127500000000000000e+02 5.075000000000000000e+01
4.000000000000000000e+00 3.216076923076919911e+02 1.324940795898440058e+02 1.082366943359380107e+00 0.000000000000000000e+00 0.000000000000000000e+00 2.343191894531250000e+03 3.491236925125119850e+00 1.000000000000000000e+00 7.662572021484379547e+02 -1.122500000000000000e+02 5.075000000000000000e+01
5.000000000000000000e+00 2.921999999999999886e+02 1.282422790527340055e+02 1.478424072265619893e+00 0.000000000000000000e+00 0.000000000000000000e+00 2.458423583984380002e+03 3.510749340057369938e+00 1.000000000000000000e+00 7.198114624023439774e+02 -1.117500000000000000e+02 5.075000000000000000e+01
2.000000000000000000e+00 2.614923076923079748e+02 1.196586990356450002e+02 1.874450683593750000e+00 0.000000000000000000e+00 2.941176593303679865e-01 2.573655029296880002e+03 3.534750461578370029e+00 1.000000000000000000e+00 7.658287353515620453e+02 -1.112500000000000000e+02 5.075000000000000000e+01
1.000000000000000000e+00 2.723000000000000114e+02 1.259344253540040057e+02 2.270477294921879885e+00 0.000000000000000000e+00 0.000000000000000000e+00 2.688886474609380002e+03 3.542708396911620206e+00 1.000000000000000000e+00 7.925377807617189774e+02 -1.107500000000000000e+02 5.075000000000000000e+01
0.000000000000000000e+00 2.811230769230770079e+02 1.417937927246090055e+02 2.410217285156250000e+00 0.000000000000000000e+00 0.000000000000000000e+00 2.750071289062500000e+03 3.563951969146729848e+00 1.000000000000000000e+00 7.244193115234379547e+02 -1.102500000000000000e+02 5.075000000000000000e+01
2.000000000000000000e+00 3.138461538461539817e+02 1.559351959228519888e+02 2.464477539062500000e+00 0.000000000000000000e+00 0.000000000000000000e+00 2.793240478515619998e+03 3.550670146942140004e+00 1.000000000000000000e+00 7.166848754882810226e+02 -1.097500000000000000e+02 5.075000000000000000e+01
0.000000000000000000e+00 3.226076923076919911e+02 1.644618988037109943e+02 2.518768310546879885e+00 0.000000000000000000e+00 0.000000000000000000e+00 2.836409667968750000e+03 3.542253732681269973e+00 1.000000000000000000e+00 7.112188110351560226e+02 -1.092500000000000000e+02 5.075000000000000000e+01
1.000000000000000000e+00 3.043076923076919797e+02 1.674902801513669885e+02 2.573028564453120115e+00 0.000000000000000000e+00 0.000000000000000000e+00 2.879579101562500000e+03 3.541121959686280185e+00 1.000000000000000000e+00 6.731296997070310226e+02 -1.087500000000000000e+02 5.075000000000000000e+01
6.000000000000000000e+00 3.099769230769230148e+02 1.906132812500000000e+02 2.079528808593750000e+00 0.000000000000000000e+00 0.000000000000000000e+00 2.837812255859380002e+03 3.531788349151609996e+00 1.000000000000000000e+00 7.222064819335939774e+02 -1.077500000000000000e+02 5.075000000000000000e+01
4.000000000000000000e+00 3.167538461538459842e+02 1.977027435302730112e+02 1.832794189453119893e+00 0.000000000000000000e+00 0.000000000000000000e+00 2.816928710937500000e+03 3.509482622146609998e+00 1.000000000000000000e+00 5.900749511718750000e+02 -1.072500000000000000e+02 5.075000000000000000e+01
1.000000000000000000e+00 3.303923076923080089e+02 2.045436096191409945e+02 1.568756103515619893e+00 0.000000000000000000e+00 0.000000000000000000e+00 2.790365966796880002e+03 3.504919290542599875e+00 1.000000000000000000e+00 6.258916625976560226e+02 -1.067500000000000000e+02 5.075000000000000000e+01
3.000000000000000000e+00 4.775384615384620020e+02 2.198020782470699999e+02 4.144287109375000000e-02 0.000000000000000000e+00 1.000000000000000000e+00 2.590543212890619998e+03 3.357424259185790127e+00 1.000000000000000000e+00 5.094258422851560226e+02 -1.017500000000000000e+02 5.075000000000000000e+01
5.400000000000000000e+01 2.232199999999999818e+03 5.372940063476560226e+02 4.575317382812500000e+00 0.000000000000000000e+00 0.000000000000000000e+00 2.115961669921880002e+03 2.232694864273069957e+00 4.000000000000000000e+00 8.418273162841799717e+01 -1.272500000000000000e+02 5.125000000000000000e+01
2.000000000000000000e+01 2.035807692307690104e+03 5.260311889648439774e+02 3.881134033203120115e+00 0.000000000000000000e+00 0.000000000000000000e+00 2.000029052734380002e+03 1.923736572265619893e+00 3.000000000000000000e+00 1.238278198242190001e+03 -1.267500000000000000e+02 5.125000000000000000e+01
5.700000000000000000e+01 1.803138461538459978e+03 4.817588806152339771e+02 3.186920166015620115e+00 0.000000000000000000e+00 0.000000000000000000e+00 1.884096313476559999e+03 1.811419486999509942e+00 4.000000000000000000e+00 8.344835205078120453e+02 -1.262500000000000000e+02 5.125000000000000000e+01
4.600000000000000000e+01 1.543084615384610061e+03 4.552609558105469887e+02 2.492736816406250000e+00 0.000000000000000000e+00 0.000000000000000000e+00 1.768163574218750000e+03 1.634583234786989969e+00 4.000000000000000000e+00 1.075796630859380002e+03 -1.257500000000000000e+02 5.125000000000000000e+01
1.000000000000000000e+00 1.339523076923079998e+03 4.163767395019530113e+02 1.571838378906250000e+00 0.000000000000000000e+00 8.571428571428570120e-02 1.594086791992190001e+03 1.351782917976380061e+00 1.000000000000000000e+00 1.513331665039059999e+03 -1.252500000000000000e+02 5.125000000000000000e+01
3.000000000000000000e+01 8.828384615384610470e+02 4.630402221679689774e+02 -1.417572021484380107e+00 0.000000000000000000e+00 0.000000000000000000e+00 1.013712036132809999e+03 1.378862619400019973e+00 3.000000000000000000e+00 1.728789306640619998e+03 -1.237500000000000000e+02 5.125000000000000000e+01
1.500000000000000000e+01 6.653769230769230489e+02 3.917894287109380116e+02 -1.572570800781250000e+00 9.999999776482580358e-03 1.142857142857140046e-01 1.179438476562500000e+03 1.610068917274479983e+00 1.000000000000000000e+00 1.566042114257809999e+03 -1.227500000000000000e+02 5.125000000000000000e+01
2.300000000000000000e+01 4.717923076923079861e+02 3.174960327148439774e+02 -1.650054931640619893e+00 0.000000000000000000e+00 2.285714285714290084e-01 1.262301635742190001e+03 1.827944636344909890e+00 3.000000000000000000e+00 1.163367431640619998e+03 -1.222500000000000000e+02 5.125000000000000000e+01
2.500000000000000000e+01 4.644307692307689877e+02 2.501055755615230112e+02 -1.798126220703119893e+00 0.000000000000000000e+00 2.857142857142859829e-02 1.312453613281250000e+03 1.911268591880799894e+00 3.000000000000000000e+00 1.213621582031250000e+03 -1.217500000000000000e+02 5.125000000000000000e+01
2.000000000000000000e+01 4.108384615384609901e+02 2.122359466552730112e+02 -2.157897949218750000e+00 0.000000000000000000e+00 8.571428571428570120e-02 1.264472045898440001e+03 1.991146683692929908e+00 3.000000000000000000e+00 1.050169921875000000e+03 -1.212500000000000000e+02 5.125000000000000000e+01
4.200000000000000000e+01 5.567230769230769738e+02 1.866910095214840055e+02 -2.517639160156250000e+00 0.000000000000000000e+00 8.571428571428570120e-02 1.216490600585940001e+03 1.994809746742250089e+00 3.000000000000000000e+00 1.281846557617190001e+03 -1.207500000000000000e+02 5.125000000000000000e+01
6.600000000000000000e+01 6.014538461538460297e+02 1.904819183349609943e+02 -2.877380371093750000e+00 0.000000000000000000e+00 2.352941185235979948e-01 1.168509033203119998e+03 1.977137804031370072e+00 4.000000000000000000e+00 1.013475097656250000e+03 -1.202500000000000000e+02 5.125000000000000000e+01
6.500000000000000000e+01 8.404769230769229580e+02 2.596905517578119884e+02 -3.147186279296879885e+00 9.999999776482580358e-03 4.705882370471949905e-01 1.142915771484380002e+03 1.886314034461979983e+00 4.000000000000000000e+00 1.268730224609380002e+03 -1.197500000000000000e+02 5.125000000000000000e+01
4.100000000000000000e+01 9.978538461538460069e+02 3.894050903320310226e+02 -3.327056884765620115e+00 0.000000000000000000e+00 8.235294222831730515e-01 1.139711059570309999e+03 1.876726984977719948e+00 3.000000000000000000e+00 1.388623413085940001e+03 -1.192500000000000000e+02 5.125000000000000000e+01
2.000000000000000000e+00 1.273753846153849963e+03 4.912336425781250000e+02 -3.506896972656250000e+00 0.000000000000000000e+00 2.352941185235979948e-01 1.136506225585940001e+03 1.772149801254270018e+00 1.000000000000000000e+00 1.850737426757809999e+03 -1.187500000000000000e+02 5.125000000000000000e+01
5.800000000000000000e+01 1.538015384615380071e+03 5.463234252929689774e+02 -3.686767578125000000e+00 0.000000000000000000e+00 3.529411852359770063e-01 1.133301513671880002e+03 1.087053418159479978e+00 4.000000000000000000e+00 9.912733154296879547e+02 -1.182500000000000000e+02 5.125000000000000000e+01
2.700000000000000000e+01 1.705415384615379935e+03 5.819368286132810226e+02 -3.623138427734379885e+00 3.739428818225860041e-01 8.571428571428570120e-02 1.157361083984380002e+03 1.049342751502990057e+00 3.000000000000000000e+00 1.922992797851559999e+03 -1.177500000000000000e+02 5.125000000000000000e+01
6.200000000000000000e+01 1.033661538461539976e+03 5.376561889648439774e+02 -3.333526611328120115e+00 0.000000000000000000e+00 1.142857142857140046e-01 1.223656738281250000e+03 1.445176601409910111e+00 4.000000000000000000e+00 1.745875610351559999e+03 -1.167500000000000000e+02 5.125000000000000000e+01
7.000000000000000000e+00 5.503846153846150173e+02 2.673769226074219887e+02 -1.616638183593750000e+00 0.000000000000000000e+00 0.000000000000000000e+00 1.657369506835940001e+03 7.190361022949219860e-01 1.000000000000000000e+00 1.301066162109380002e+03 -1.147500000000000000e+02 5.125000000000000000e+01
4.000000000000000000e+00 4.661769230769230035e+02 2.143645019531250000e+02 -1.090911865234380107e+00 0.000000000000000000e+00 0.000000000000000000e+00 1.790905395507809999e+03 8.055008053779599830e-01 1.000000000000000000e+00 1.190620239257809999e+03 -1.142500000000000000e+02 5.125000000000000000e+01
1.000000000000000000e+00 3.958461538461539817e+02 1.945319366455080115e+02 -5.601501464843750000e-01 0.000000000000000000e+00 0.000000000000000000e+00 1.924484130859380002e+03 1.859081745147709963e+00 1.000000000000000000e+00 9.847489013671879547e+02 -1.137500000000000000e+02 5.125000000000000000e+01
5.000000000000000000e+00 3.314384615384619792e+02 1.470409240722659945e+02 9.370117187500000000e-01 0.000000000000000000e+00 0.000000000000000000e+00 2.311316894531250000e+03 3.415352582931519887e+00 1.000000000000000000e+00 7.559796752929689774e+02 -1.122500000000000000e+02 5.125000000000000000e+01
5.000000000000000000e+00 3.036307692307689763e+02 1.326647186279300001e+02 1.277557373046880107e+00 0.000000000000000000e+00 0.000000000000000000e+00 2.417088867187500000e+03 3.397351741790770152e+00 1.000000000000000000e+00 7.641409301757810226e+02 -1.117500000000000000e+02 5.125000000000000000e+01
5.000000000000000000e+00 2.766384615384620247e+02 1.241729278564449999e+02 1.618103027343750000e+00 0.000000000000000000e+00 0.000000000000000000e+00 2.522860839843750000e+03 3.408376455307009945e+00 1.000000000000000000e+00 7.762044067382810226e+02 -1.112500000000000000e+02 5.125000000000000000e+01
5.000000000000000000e+00 2.875846153846150060e+02 1.256973648071290057e+02 1.958648681640619893e+00 0.000000000000000000e+00 0.000000000000000000e+00 2.628632812500000000e+03 3.431429862976070222e+00 1.000000000000000000e+00 7.695335083007810226e+02 -1.107500000000000000e+02 5.125000000000000000e+01
5.000000000000000000e+00 2.968846153846150173e+02 1.343416595458980112e+02 2.049468994140620115e+00 0.000000000000000000e+00 0.000000000000000000e+00 2.680662353515619998e+03 3.464574575424189895e+00 1.000000000000000000e+00 7.397543945312500000e+02 -1.102500000000000000e+02 5.125000000000000000e+01
0.000000000000000000e+00 3.058846153846150173e+02 1.474654998779300001e+02 2.057037353515620115e+00 0.000000000000000000e+00 0.000000000000000000e+00 2.714777832031250000e+03 3.476637601852420101e+00 1.000000000000000000e+00 6.877773437500000000e+02 -1.097500000000000000e+02 5.125000000000000000e+01
1.000000000000000000e+00 3.123384615384620133e+02 1.568625793457030113e+02 2.064605712890620115e+00 0.000000000000000000e+00 0.000000000000000000e+00 2.748893554687500000e+03 3.469867229461669922e+00 1.000000000000000000e+00 6.787004394531250000e+02 -1.092500000000000000e+02 5.125000000000000000e+01
0.000000000000000000e+00 3.096307692307689763e+02 1.719778594970699999e+02 1.814422607421880107e+00 0.000000000000000000e+00 2.941176593303679865e-01 2.760782470703119998e+03 3.485103607177729934e+00 1.000000000000000000e+00 6.359288330078120453e+02 -1.082500000000000000e+02 5.125000000000000000e+01
9.000000000000000000e+00 3.202076923076920139e+02 1.991815948486330115e+02 1.556671142578119893e+00 0.000000000000000000e+00 0.000000000000000000e+00 2.738555908203119998e+03 3.504797220230099875e+00 1.000000000000000000e+00 5.722769165039060226e+02 -1.077500000000000000e+02 5.125000000000000000e+01
7.000000000000000000e+00 5.523846153846160405e+02 1.787323913574219887e+02 -3.271484375000000000e-02 0.000000000000000000e+00 2.857142857142859760e-01 2.566132568359380002e+03 2.476564884185790127e+00 1.000000000000000000e+00 4.875391540527339771e+02 -1.007500000000000000e+02 5.125000000000000000e+01
7.500000000000000000e+01 3.138869230769229944e+03 6.091313476562500000e+02 4.076385498046880329e+00 0.000000000000000000e+00 0.000000000000000000e+00 1.953665161132809999e+03 2.246046304702760121e+00 4.000000000000000000e+00 2.216110687255859943e+02 -1.277500000000000000e+02 5.175000000000000000e+01
7.200000000000000000e+01 2.574500000000000000e+03 5.862507324218750000e+02 3.265502929687500000e+00 0.000000000000000000e+00 0.000000000000000000e+00 1.777806884765619998e+03 1.912869453430180000e+00 4.000000000000000000e+00 8.134819335937500000e+02 -1.272500000000000000e+02 5.175000000000000000e+01
9.000000000000000000e+00 2.026292307692310033e+03 5.151359252929689774e+02 2.714141845703120115e+00 0.000000000000000000e+00 0.000000000000000000e+00 1.718803344726559999e+03 1.767668008804319957e+00 1.000000000000000000e+00 1.326183959960940001e+03 -1.267500000000000000e+02 5.175000000000000000e+01
1.000000000000000000e+00 1.641892307692309942e+03 4.213594360351560226e+02 2.162780761718750000e+00 0.000000000000000000e+00 0.000000000000000000e+00 1.659799804687500000e+03 1.405230164527889958e+00 1.000000000000000000e+00 1.497305419921880002e+03 -1.262500000000000000e+02 5.175000000000000000e+01
5.300000000000000000e+01 1.343299999999999955e+03 3.947579040527339771e+02 1.611419677734380107e+00 0.000000000000000000e+00 2.941176593303679865e-01 1.600796264648440001e+03 1.391751170158390005e+00 4.000000000000000000e+00 1.149692504882809999e+03 -1.257500000000000000e+02 5.175000000000000000e+01
1.400000000000000000e+01 1.135146153846149900e+03 3.057758483886719887e+02 9.088439941406250000e-01 5.433080196380619675e-01 5.294117927551269531e-01 1.496613891601559999e+03 1.393998026847840022e+00 1.000000000000000000e+00 1.956757934570309999e+03 -1.252500000000000000e+02 5.175000000000000000e+01
3.600000000000000000e+01 5.041615384615390099e+02 2.091865386962890057e+02 -5.971374511718750000e-01 0.000000000000000000e+00 1.142857142857140046e-01 1.258129638671880002e+03 1.729506731033330080e+00 3.000000000000000000e+00 1.378151245117190001e+03 -1.242500000000000000e+02 5.175000000000000000e+01
2.900000000000000000e+01 4.718999999999999773e+02 2.581965637207030113e+02 -1.350128173828119893e+00 0.000000000000000000e+00 8.823529481887819603e-01 1.138887573242190001e+03 1.766249537467960096e+00 3.000000000000000000e+00 1.241383178710940001e+03 -1.237500000000000000e+02 5.175000000000000000e+01
2.100000000000000000e+01 3.791692307692309782e+02 2.885184936523439774e+02 -1.521881103515619893e+00 0.000000000000000000e+00 2.352941185235979948e-01 1.174121337890619998e+03 1.791177630424499956e+00 3.000000000000000000e+00 1.283567504882809999e+03 -1.232500000000000000e+02 5.175000000000000000e+01
4.900000000000000000e+01 3.657846153846149946e+02 2.806498413085939774e+02 -1.693603515625000000e+00 0.000000000000000000e+00 0.000000000000000000e+00 1.209355102539059999e+03 1.883111476898190029e+00 4.000000000000000000e+00 1.047333251953119998e+03 -1.227500000000000000e+02 5.175000000000000000e+01
6.900000000000000000e+01 3.804923076923079748e+02 2.592072753906250000e+02 -1.865356445312500000e+00 0.000000000000000000e+00 7.647058963775630325e-01 1.244588867187500000e+03 1.981209754943850099e+00 4.000000000000000000e+00 9.904421997070310226e+02 -1.222500000000000000e+02 5.175000000000000000e+01
6.400000000000000000e+01 4.284692307692309896e+02 2.429413299560550001e+02 -2.097442626953120115e+00 0.000000000000000000e+00 2.857142857142859829e-02 1.251971679687500000e+03 2.008298635482789862e+00 4.000000000000000000e+00 1.064200805664059999e+03 -1.217500000000000000e+02 5.175000000000000000e+01
4.900000000000000000e+01 4.978769230769229921e+02 2.331153411865230112e+02 -2.510528564453120115e+00 0.000000000000000000e+00 2.352941185235979948e-01 1.175801513671880002e+03 2.012546777725220171e+00 4.000000000000000000e+00 1.008172973632809999e+03 -1.212500000000000000e+02 5.175000000000000000e+01
4.200000000000000000e+01 7.029384615384619792e+02 2.535692901611330115e+02 -2.923614501953120115e+00 0.000000000000000000e+00 4.705882370471949905e-01 1.099631469726559999e+03 1.980815768241880104e+00 3.000000000000000000e+00 1.178273071289059999e+03 -1.207500000000000000e+02 5.175000000000000000e+01
5.600000000000000000e+01 7.603999999999999773e+02 2.930364685058589771e+02 -3.336730957031250000e+00 0.000000000000000000e+00 5.714285714285709944e-02 1.023461364746089998e+03 1.908674955368039994e+00 4.000000000000000000e+00 1.415177856445309999e+03 -1.202500000000000000e+02 5.175000000000000000e+01
5.800000000000000000e+01 1.033500000000000000e+03 3.944580078125000000e+02 -3.598480224609379885e+00 9.999999776482580358e-03 2.941176593303679865e-01 9.887588500976560226e+02 1.741578102111819959e+00 4.000000000000000000e+00 1.168028198242190001e+03 -1.197500000000000000e+02 5.175000000000000000e+01
4.800000000000000000e+01 1.134476923076920002e+03 4.863350524902339771e+02 -3.708892822265620115e+00 9.999999776482580358e-03 1.428571428571429880e-01 9.955238647460939774e+02 1.667719960212709962e+00 4.000000000000000000e+00 1.681588256835940001e+03 -1.192500000000000000e+02 5.175000000000000000e+01
5.500000000000000000e+01 1.331876923076920093e+03 5.290398559570310226e+02 -3.819335937500000000e+00 0.000000000000000000e+00 5.294117927551269531e-01 1.002288879394529999e+03 1.515022158622739923e+00 4.000000000000000000e+00 1.239281860351559999e+03 -1.187500000000000000e+02 5.175000000000000000e+01
6.200000000000000000e+01 1.401353846153850100e+03 5.487744140625000000e+02 -3.752990722656250000e+00 9.999999776482580358e-03 2.352941185235979948e-01 1.068021484375000000e+03 1.212414979934689940e+00 4.000000000000000000e+00 1.677941894531250000e+03 -1.177500000000000000e+02 5.175000000000000000e+01
5.300000000000000000e+01 6.266076923076919911e+02 2.601325683593750000e+02 -2.018798828125000000e+00 0.000000000000000000e+00 2.941176593303679865e-01 1.538041748046880002e+03 1.630504131317140004e+00 4.000000000000000000e+00 1.649852539062500000e+03 -1.152500000000000000e+02 5.175000000000000000e+01
1.900000000000000000e+01 5.343999999999999773e+02 2.319320526123050001e+02 -1.560485839843750000e+00 0.000000000000000000e+00 1.764705926179890028e-01 1.658499267578119998e+03 1.772187113761900079e+00 1.000000000000000000e+00 1.160038574218750000e+03 -1.147500000000000000e+02 5.175000000000000000e+01
6.000000000000000000e+00 3.401230769230770079e+02 1.389890136718750000e+02 1.076721191406250000e+00 0.000000000000000000e+00 0.000000000000000000e+00 2.375754150390619998e+03 3.317130088806150123e+00 1.000000000000000000e+00 8.072971191406250000e+02 -1.117500000000000000e+02 5.175000000000000000e+01
5.000000000000000000e+00 3.084384615384619792e+02 1.238668746948240056e+02 1.361785888671880107e+00 0.000000000000000000e+00 0.000000000000000000e+00 2.472066650390619998e+03 3.302870512008670101e+00 1.000000000000000000e+00 7.660095825195310226e+02 -1.112500000000000000e+02 5.175000000000000000e+01
5.000000000000000000e+00 3.212615384615389758e+02 1.234337463378909945e+02 1.646820068359380107e+00 0.000000000000000000e+00 0.000000000000000000e+00 2.568379150390619998e+03 3.341025352478030008e+00 1.000000000000000000e+00 7.534255981445310226e+02 -1.107500000000000000e+02 5.175000000000000000e+01
6.000000000000000000e+00 3.288923076923080089e+02 1.250182342529300001e+02 1.688720703125000000e+00 0.000000000000000000e+00 0.000000000000000000e+00 2.611253662109380002e+03 3.380146980285640090e+00 1.000000000000000000e+00 6.708427734375000000e+02 -1.102500000000000000e+02 5.175000000000000000e+01
5.000000000000000000e+00 3.309769230769230148e+02 1.343179626464840055e+02 1.649566650390619893e+00 0.000000000000000000e+00 0.000000000000000000e+00 2.636315429687500000e+03 3.390677928924560103e+00 1.000000000000000000e+00 7.191429443359379547e+02 -1.097500000000000000e+02 5.175000000000000000e+01
2.000000000000000000e+00 3.241846153846149718e+02 1.481765136718750000e+02 1.610412597656250000e+00 0.000000000000000000e+00 0.000000000000000000e+00 2.661377197265619998e+03 3.395056009292599875e+00 1.000000000000000000e+00 7.056986083984379547e+02 -1.092500000000000000e+02 5.175000000000000000e+01
0.000000000000000000e+00 3.238384615384620133e+02 1.584577789306640057e+02 1.571289062500000000e+00 0.000000000000000000e+00 3.529411852359770063e-01 2.686438964843750000e+03 3.385730504989620027e+00 1.000000000000000000e+00 6.258101196289060226e+02 -1.087500000000000000e+02 5.175000000000000000e+01
2.000000000000000000e+00 3.300384615384620020e+02 1.705020294189449999e+02 1.302551269531250000e+00 0.000000000000000000e+00 0.000000000000000000e+00 2.662869384765619998e+03 3.403754711151119938e+00 1.000000000000000000e+00 6.747471923828120453e+02 -1.082500000000000000e+02 5.175000000000000000e+01
6.000000000000000000e+00 3.229846153846149832e+02 2.678687744140619884e+02 7.651062011718750000e-01 0.000000000000000000e+00 5.882353186607359730e-01 2.615729980468750000e+03 3.454234838485719994e+00 1.000000000000000000e+00 5.342119750976560226e+02 -1.072500000000000000e+02 5.175000000000000000e+01
1.800000000000000000e+01 4.575384615384609788e+02 2.036488189697269888e+02 -6.492004394531250000e-01 0.000000000000000000e+00 1.294117689132689986e+00 2.457696777343750000e+03 3.221464872360229936e+00 1.000000000000000000e+00 5.312339477539060226e+02 -1.032500000000000000e+02 5.175000000000000000e+01
5.000000000000000000e+01 5.407307692307690559e+02 1.753310699462890057e+02 -3.235473632812500000e-01 9.999999776482580358e-03 1.470588207244869938e+00 2.509095703125000000e+03 8.239580988883969948e-01 4.000000000000000000e+00 6.545857543945310226e+02 -1.012500000000000000e+02 5.175000000000000000e+01
5.500000000000000000e+01 5.746384615384620247e+02 1.523570404052730112e+02 -2.473449707031250000e-01 9.999999776482580358e-03 8.571428571428570120e-02 2.519489746093750000e+03 8.342844843864439808e-01 4.000000000000000000e+00 6.775545043945310226e+02 -1.007500000000000000e+02 5.175000000000000000e+01
2.000000000000000000e+00 1.855730769230769965e+03 4.157297668457030113e+02 1.547180175781250000e+00 0.000000000000000000e+00 2.941176593303679865e-01 1.437577636718750000e+03 1.704167246818540038e+00 1.000000000000000000e+00 1.282362915039059999e+03 -1.267500000000000000e+02 5.225000000000000000e+01
0.000000000000000000e+00 1.420015384615380071e+03 2.824417419433589771e+02 1.138641357421880107e+00 9.999999776482580358e-03 5.714285714285709944e-02 1.435503295898440001e+03 1.542563080787660024e+00 1.000000000000000000e+00 1.820341186523440001e+03 -1.262500000000000000e+02 5.225000000000000000e+01
1.800000000000000000e+01 1.115653846153850054e+03 2.867966918945310226e+02 7.301330566406250000e-01 0.000000000000000000e+00 1.428571428571429880e-01 1.433428955078119998e+03 1.539183735847470036e+00 1.000000000000000000e+00 9.160560913085939774e+02 -1.257500000000000000e+02 5.225000000000000000e+01
4.000000000000000000e+01 8.167076923076920139e+02 2.245036926269530113e+02 2.458496093750000000e-01 0.000000000000000000e+00 5.714285714285709944e-02 1.399140991210940001e+03 1.623943567276000088e+00 3.000000000000000000e+00 1.219189819335940001e+03 -1.252500000000000000e+02 5.225000000000000000e+01
4.800000000000000000e+01 6.171615384615380435e+02 1.376041259765619884e+02 -2.636413574218750000e-01 9.999999776482580358e-03 5.714285714285709944e-02 1.354114990234380002e+03 1.722468733787539952e+00 4.000000000000000000e+00 1.544017211914059999e+03 -1.247500000000000000e+02 5.225000000000000000e+01
3.000000000000000000e+01 4.260769230769229807e+02 1.394813842773440058e+02 -7.731628417968750000e-01 0.000000000000000000e+00 1.142857142857140046e-01 1.309089111328119998e+03 1.849372386932369938e+00 3.000000000000000000e+00 1.122523559570309999e+03 -1.242500000000000000e+02 5.225000000000000000e+01
2.300000000000000000e+01 3.578076923076919797e+02 1.776664733886719887e+02 -1.282684326171880107e+00 0.000000000000000000e+00 1.142857142857140046e-01 1.264063110351559999e+03 1.903648257255549980e+00 3.000000000000000000e+00 1.088967285156250000e+03 -1.237500000000000000e+02 5.225000000000000000e+01
2.500000000000000000e+01 3.729692307692309896e+02 2.211523437500000000e+02 -1.548675537109380107e+00 0.000000000000000000e+00 5.294117927551269531e-01 1.251667480468750000e+03 1.885615944862369942e+00 3.000000000000000000e+00 1.183639892578119998e+03 -1.232500000000000000e+02 5.225000000000000000e+01
3.700000000000000000e+01 4.227615384615380094e+02 2.376499176025390057e+02 -1.814666748046880107e+00 0.000000000000000000e+00 7.058823704719540126e-01 1.239271728515619998e+03 1.910413146018979935e+00 3.000000000000000000e+00 1.142759277343750000e+03 -1.227500000000000000e+02 5.225000000000000000e+01
5.700000000000000000e+01 4.210538461538459956e+02 2.556651306152340055e+02 -2.080657958984379885e+00 0.000000000000000000e+00 2.857142857142859829e-02 1.226876098632809999e+03 2.032485723495479846e+00 4.000000000000000000e+00 6.825238647460939774e+02 -1.222500000000000000e+02 5.225000000000000000e+01
4.700000000000000000e+01 5.336384615384620247e+02 2.580588989257810226e+02 -2.396759033203120115e+00 0.000000000000000000e+00 2.857142857142859829e-02 1.191489746093750000e+03 2.029155731201170099e+00 4.000000000000000000e+00 1.021844177246089998e+03 -1.217500000000000000e+02 5.225000000000000000e+01
5.900000000000000000e+01 6.892769230769230262e+02 2.678727722167969887e+02 -2.863189697265620115e+00 0.000000000000000000e+00 2.857142857142859829e-02 1.087131103515619998e+03 1.940292000770569958e+00 4.000000000000000000e+00 1.251373779296880002e+03 -1.212500000000000000e+02 5.225000000000000000e+01
5.300000000000000000e+01 1.090807692307690104e+03 4.704992370605469887e+02 -4.090759277343750000e+00 0.000000000000000000e+00 1.142857142857140046e-01 8.513366699218750000e+02 1.115306973457339978e+00 4.000000000000000000e+00 1.094031372070309999e+03 -1.192500000000000000e+02 5.225000000000000000e+01
4.000000000000000000e+01 1.115984615384619929e+03 4.754613647460939774e+02 -4.131774902343750000e+00 0.000000000000000000e+00 1.428571428571429880e-01 8.680714721679689774e+02 1.294304728508000046e+00 3.000000000000000000e+00 1.940713012695309999e+03 -1.187500000000000000e+02 5.225000000000000000e+01
2.000000000000000000e+00 1.090961538461539931e+03 4.635611877441410229e+02 -4.172760009765619671e+00 5.347923636436460182e-01 2.285714285714290084e-01 8.848062133789060226e+02 7.139617800712589890e-01 1.000000000000000000e+00 1.941091064453119998e+03 -1.182500000000000000e+02 5.225000000000000000e+01
5.100000000000000000e+01 6.923461538461540385e+02 3.486440734863280113e+02 -2.682189941406250000e+00 9.999999776482580358e-03 2.941176593303679865e-01 1.337448974609380002e+03 1.431113123893740013e+00 4.000000000000000000e+00 1.920178222656250000e+03 -1.162500000000000000e+02 5.225000000000000000e+01
5.700000000000000000e+01 6.441846153846159950e+02 2.853277587890619884e+02 -2.289581298828120115e+00 0.000000000000000000e+00 0.000000000000000000e+00 1.444842285156250000e+03 1.583703875541689898e+00 4.000000000000000000e+00 1.524180908203119998e+03 -1.157500000000000000e+02 5.225000000000000000e+01
3.600000000000000000e+01 5.869846153846150401e+02 2.540787200927730112e+02 -1.896972656250000000e+00 0.000000000000000000e+00 2.857142857142859829e-02 1.552235595703119998e+03 1.792163968086240011e+00 3.000000000000000000e+00 1.225608032226559999e+03 -1.152500000000000000e+02 5.225000000000000000e+01
5.000000000000000000e+00 3.926923076923080203e+02 1.453413391113280113e+02 8.758850097656250000e-01 0.000000000000000000e+00 2.941176593303679865e-01 2.334419433593750000e+03 3.323366880416870117e+00 1.000000000000000000e+00 7.581229858398439774e+02 -1.117500000000000000e+02 5.225000000000000000e+01
3.000000000000000000e+00 3.797846153846149946e+02 1.303087158203119884e+02 1.105438232421880107e+00 0.000000000000000000e+00 5.882352963089940157e-02 2.421272460937500000e+03 3.303083181381230027e+00 1.000000000000000000e+00 7.669839477539060226e+02 -1.112500000000000000e+02 5.225000000000000000e+01
6.000000000000000000e+00 3.758999999999999773e+02 1.305256652832030113e+02 1.334991455078119893e+00 0.000000000000000000e+00 0.000000000000000000e+00 2.508125244140619998e+03 3.315335750579829988e+00 1.000000000000000000e+00 6.926364746093750000e+02 -1.107500000000000000e+02 5.225000000000000000e+01
1.000000000000000000e+00 3.866384615384620247e+02 1.344821472167969887e+02 1.328002929687500000e+00 0.000000000000000000e+00 0.000000000000000000e+00 2.541844726562500000e+03 3.337440490722659803e+00 1.000000000000000000e+00 6.803093261718750000e+02 -1.102500000000000000e+02 5.225000000000000000e+01
3.700000000000000000e+01 4.841384615384610015e+02 2.054080657958980112e+02 -9.510803222656250000e-01 0.000000000000000000e+00 4.117647111415860262e-01 2.400094970703119998e+03 2.516417741775510031e+00 3.000000000000000000e+00 6.456119384765620453e+02 -1.032500000000000000e+02 5.225000000000000000e+01
4.900000000000000000e+01 4.902307692307689990e+02 2.156472015380859943e+02 -8.706665039062500000e-01 0.000000000000000000e+00 5.714285714285709944e-02 2.413161132812500000e+03 1.738768935203550026e+00 4.000000000000000000e+00 5.800095825195310226e+02 -1.027500000000000000e+02 5.225000000000000000e+01
5.500000000000000000e+01 5.044846153846149832e+02 2.175328216552730112e+02 -7.565917968750000000e-01 0.000000000000000000e+00 0.000000000000000000e+00 2.430214599609380002e+03 8.585768938064579636e-01 4.000000000000000000e+00 5.241331176757810226e+02 -1.022500000000000000e+02 5.225000000000000000e+01
3.800000000000000000e+01 5.151230769230769511e+02 2.032028961181640057e+02 -6.425170898437500000e-01 0.000000000000000000e+00 0.000000000000000000e+00 2.447268310546880002e+03 8.203011751174930088e-01 3.000000000000000000e+00 5.744323120117189774e+02 -1.017500000000000000e+02 5.225000000000000000e+01
6.000000000000000000e+00 5.341923076923079634e+02 1.796724243164059942e+02 -5.284729003906250000e-01 0.000000000000000000e+00 2.941176593303679865e-01 2.464321777343750000e+03 1.507764697074889915e+00 1.000000000000000000e+00 3.206966857910160229e+02 -1.012500000000000000e+02 5.225000000000000000e+01
5.700000000000000000e+01 5.575615384615390440e+02 1.604437866210940058e+02 -4.620056152343750000e-01 0.000000000000000000e+00 1.352941155433649900e+00 2.472846923828119998e+03 1.084669947624210096e+00 4.000000000000000000e+00 3.237557067871089771e+02 -1.007500000000000000e+02 5.225000000000000000e+01
1.000000000000000000e+00 2.543500000000000000e+03 6.402989501953120453e+02 1.898345947265619893e+00 0.000000000000000000e+00 0.000000000000000000e+00 1.452907104492190001e+03 1.417439818382260075e+00 1.000000000000000000e+00 8.456716308593750000e+02 -1.277500000000000000e+02 5.275000000000000000e+01
4.000000000000000000e+00 1.577992307692310078e+03 3.419484252929689774e+02 7.959289550781250000e-01 1.079351082444190008e-01 8.571428571428570120e-02 1.335023559570309999e+03 1.619327187538150081e+00 1.000000000000000000e+00 1.141264892578119998e+03 -1.267500000000000000e+02 5.275000000000000000e+01
7.200000000000000000e+01 1.165284615384620110e+03 2.891770019531250000e+02 4.501953125000000000e-01 0.000000000000000000e+00 8.823529481887819603e-01 1.350959350585940001e+03 1.627217292785640090e+00 4.000000000000000000e+00 8.452434692382810226e+02 -1.262500000000000000e+02 5.275000000000000000e+01
5.600000000000000000e+01 8.792384615384610242e+02 2.751862487792969887e+02 1.044616699218750000e-01 2.639084160327910267e-01 2.941176593303679865e-01 1.366895141601559999e+03 1.640986442565919967e+00 4.000000000000000000e+00 1.823990844726559999e+03 -1.257500000000000000e+02 5.275000000000000000e+01
1.300000000000000000e+01 7.041923076923079634e+02 2.073384246826169885e+02 -2.536315917968750000e-01 4.544714689254760187e-01 2.941176593303679865e-01 1.359378662109380002e+03 1.647232174873350052e+00 1.000000000000000000e+00 1.847818115234380002e+03 -1.252500000000000000e+02 5.275000000000000000e+01
3.700000000000000000e+01 5.886461538461539931e+02 1.449727935791019888e+02 -6.158447265625000000e-01 9.999999776482580358e-03 4.705882370471949905e-01 1.344044677734380002e+03 1.649510145187379928e+00 3.000000000000000000e+00 1.656206787109380002e+03 -1.247500000000000000e+02 5.275000000000000000e+01
5.700000000000000000e+01 4.908769230769229921e+02 1.647587280273440058e+02 -9.780883789062500000e-01 9.999999776482580358e-03 2.857142857142859829e-02 1.328710693359380002e+03 1.705463767051700108e+00 4.000000000000000000e+00 1.469044433593750000e+03 -1.242500000000000000e+02 5.275000000000000000e+01
4.800000000000000000e+01 4.454538461538459728e+02 2.045993194580080115e+02 -1.340301513671880107e+00 9.999999776482580358e-03 2.941176593303679865e-01 1.313376708984380002e+03 1.775629997253419967e+00 4.000000000000000000e+00 1.314285156250000000e+03 -1.237500000000000000e+02 5.275000000000000000e+01
3.000000000000000000e+01 4.590615384615389871e+02 2.406132507324219887e+02 -1.561523437500000000e+00 0.000000000000000000e+00 2.941176593303679865e-01 1.294129638671880002e+03 1.848097562789920101e+00 3.000000000000000000e+00 1.315183227539059999e+03 -1.232500000000000000e+02 5.275000000000000000e+01
6.500000000000000000e+01 5.060769230769229807e+02 2.538084869384769888e+02 -1.782745361328119893e+00 0.000000000000000000e+00 2.000000000000000111e-01 1.274882446289059999e+03 1.929462194442749912e+00 4.000000000000000000e+00 1.206238769531250000e+03 -1.227500000000000000e+02 5.275000000000000000e+01
1.700000000000000000e+01 5.809461538461539476e+02 2.622173461914060226e+02 -2.003997802734379885e+00 0.000000000000000000e+00 2.352941185235979948e-01 1.255635375976559999e+03 1.983638644218439939e+00 1.000000000000000000e+00 1.000040405273440001e+03 -1.222500000000000000e+02 5.275000000000000000e+01
4.400000000000000000e+01 7.829384615384619792e+02 2.797578735351560226e+02 -2.260192871093750000e+00 0.000000000000000000e+00 0.000000000000000000e+00 1.220533203125000000e+03 1.897423148155209960e+00 3.000000000000000000e+00 1.178834106445309999e+03 -1.217500000000000000e+02 5.275000000000000000e+01
6.200000000000000000e+01 9.139307692307689877e+02 2.938366699218750000e+02 -2.621246337890620115e+00 0.000000000000000000e+00 2.941176593303679865e-01 1.137865844726559999e+03 9.747611284255980335e-01 4.000000000000000000e+00 1.707042846679690001e+03 -1.212500000000000000e+02 5.275000000000000000e+01
5.300000000000000000e+01 9.231384615384610015e+02 3.144640502929689774e+02 -2.982330322265620115e+00 9.999999776482580358e-03 1.714285714285710138e-01 1.055198486328119998e+03 1.204934477806089976e+00 4.000000000000000000e+00 1.368506469726559999e+03 -1.207500000000000000e+02 5.275000000000000000e+01
6.000000000000000000e+00 9.869538461538460297e+02 3.401090087890619884e+02 -3.343383789062500000e+00 4.325776398181919724e-01 5.882353186607359730e-01 9.725311279296879547e+02 9.401230216026309483e-01 1.000000000000000000e+00 1.966505126953119998e+03 -1.202500000000000000e+02 5.275000000000000000e+01
5.400000000000000000e+01 9.267230769230769738e+02 3.362967834472660229e+02 -3.539367675781250000e+00 0.000000000000000000e+00 0.000000000000000000e+00 9.605688476562500000e+02 1.238379478454590066e+00 4.000000000000000000e+00 8.721864013671879547e+02 -1.192500000000000000e+02 5.275000000000000000e+01
4.400000000000000000e+01 7.018538461538460069e+02 2.771838684082030113e+02 -2.548217773437500000e+00 9.999999776482580358e-03 2.857142857142859829e-02 1.322005737304690001e+03 1.509956121444699928e+00 3.000000000000000000e+00 1.680677368164059999e+03 -1.167500000000000000e+02 5.275000000000000000e+01
5.900000000000000000e+01 5.884076923076919456e+02 2.700622558593750000e+02 -2.179382324218750000e+00 0.000000000000000000e+00 2.941176593303679865e-01 1.437416503906250000e+03 1.712050199508670101e+00 4.000000000000000000e+00 1.292322387695309999e+03 -1.162500000000000000e+02 5.275000000000000000e+01
4.400000000000000000e+01 5.609384615384609560e+02 2.608846130371089771e+02 -1.851135253906250000e+00 0.000000000000000000e+00 5.714285714285709944e-02 1.533966064453119998e+03 1.829939484596249999e+00 3.000000000000000000e+00 1.089926147460940001e+03 -1.157500000000000000e+02 5.275000000000000000e+01
4.700000000000000000e+01 5.578461538461540385e+02 2.526489868164059942e+02 -1.522888183593750000e+00 0.000000000000000000e+00 2.857142857142859829e-02 1.630515502929690001e+03 1.069349765777589889e+00 4.000000000000000000e+00 1.007056457519529999e+03 -1.152500000000000000e+02 5.275000000000000000e+01
4.700000000000000000e+01 5.777076923076920139e+02 2.419716339111330115e+02 -1.194641113281250000e+00 0.000000000000000000e+00 2.857142857142859829e-02 1.727064941406250000e+03 1.843437314033510077e+00 4.000000000000000000e+00 9.987631835937500000e+02 -1.147500000000000000e+02 5.275000000000000000e+01
3.000000000000000000e+00 4.679615384615379980e+02 1.910127410888669885e+02 -9.927368164062500000e-02 0.000000000000000000e+00 8.823529481887819603e-01 2.044703735351559999e+03 3.247699499130249912e+00 1.000000000000000000e+00 7.743010864257810226e+02 -1.132500000000000000e+02 5.275000000000000000e+01
3.000000000000000000e+00 4.835384615384609788e+02 2.045012817382809942e+02 -1.256561279296880107e+00 0.000000000000000000e+00 8.235294222831730515e-01 2.346953125000000000e+03 3.136277198791499909e+00 1.000000000000000000e+00 4.560611267089839771e+02 -1.032500000000000000e+02 5.275000000000000000e+01
4.900000000000000000e+01 4.816615384615379867e+02 2.288598785400390057e+02 -1.175292968750000000e+00 0.000000000000000000e+00 1.117647051811220038e+00 2.359574218750000000e+03 8.282575607299800247e-01 4.000000000000000000e+00 4.214620361328119884e+02 -1.027500000000000000e+02 5.275000000000000000e+01
4.900000000000000000e+01 5.077461538461540158e+02 2.247726287841800001e+02 -9.576416015625000000e-01 0.000000000000000000e+00 5.882352963089940157e-02 2.391044189453119998e+03 8.827311992645260341e-01 4.000000000000000000e+00 4.008840332031250000e+02 -1.017500000000000000e+02 5.275000000000000000e+01
5.400000000000000000e+01 5.243461538461540385e+02 1.886646881103519888e+02 -8.488159179687500000e-01 9.999999776482580358e-03 5.882353186607359730e-01 2.406779296875000000e+03 1.141593933105470082e+00 4.000000000000000000e+00 5.085118713378910229e+02 -1.012500000000000000e+02 5.275000000000000000e+01
7.100000000000000000e+01 1.939846153846149946e+03 5.009942016601560226e+02 8.300476074218750000e+00 0.000000000000000000e+00 0.000000000000000000e+00 3.157925781250000000e+03 2.236181974411009854e+00 4.000000000000000000e+00 2.487668457031250000e+02 -1.322500000000000000e+02 5.325000000000000000e+01
5.900000000000000000e+01 3.010630769230770056e+03 6.183909301757810226e+02 3.028411865234379885e+00 0.000000000000000000e+00 0.000000000000000000e+00 1.757555908203119998e+03 2.028481245040890002e+00 4.000000000000000000e+00 6.434152221679689774e+02 -1.287500000000000000e+02 5.325000000000000000e+01
0.000000000000000000e+00 2.142523076923080225e+03 6.170579833984379547e+02 1.131347656250000000e+00 0.000000000000000000e+00 0.000000000000000000e+00 1.363314208984380002e+03 1.274380326271060015e+00 1.000000000000000000e+00 1.589154907226559999e+03 -1.277500000000000000e+02 5.325000000000000000e+01
2.000000000000000000e+00 1.705207692307689967e+03 5.320778808593750000e+02 5.015563964843750000e-01 0.000000000000000000e+00 2.857142857142859829e-02 1.274896606445309999e+03 1.214390516281129928e+00 1.000000000000000000e+00 1.174998046875000000e+03 -1.272500000000000000e+02 5.325000000000000000e+01
5.900000000000000000e+01 6.442538461538459842e+02 2.749826660156250000e+02 -4.314575195312500000e-01 0.000000000000000000e+00 5.882353186607359730e-01 1.335753173828119998e+03 1.836037158966060012e+00 4.000000000000000000e+00 1.011596496582029999e+03 -1.257500000000000000e+02 5.325000000000000000e+01
2.000000000000000000e+01 5.607538461538459842e+02 2.048036804199219887e+02 -6.957397460937500000e-01 0.000000000000000000e+00 6.470588445663449928e-01 1.339872314453119998e+03 1.833534955978390002e+00 3.000000000000000000e+00 1.223620727539059999e+03 -1.252500000000000000e+02 5.325000000000000000e+01
5.300000000000000000e+01 5.165692307692310123e+02 1.952169799804690058e+02 -9.444274902343750000e-01 0.000000000000000000e+00 2.285714285714290084e-01 1.338602661132809999e+03 1.820217967033390005e+00 4.000000000000000000e+00 1.064626464843750000e+03 -1.247500000000000000e+02 5.325000000000000000e+01
5.500000000000000000e+01 4.873615384615389985e+02 2.332355804443359943e+02 -1.193115234375000000e+00 0.000000000000000000e+00 3.529411852359770063e-01 1.337333007812500000e+03 1.826536655426030054e+00 4.000000000000000000e+00 1.125214477539059999e+03 -1.242500000000000000e+02 5.325000000000000000e+01
4.500000000000000000e+01 4.820461538461540272e+02 2.768065185546880116e+02 -1.441833496093750000e+00 0.000000000000000000e+00 7.647058963775630325e-01 1.336063232421880002e+03 1.869390249252320002e+00 4.000000000000000000e+00 9.190346679687500000e+02 -1.237500000000000000e+02 5.325000000000000000e+01
4.500000000000000000e+01 5.171461538461539931e+02 2.865669250488280113e+02 -1.569488525390619893e+00 0.000000000000000000e+00 8.823529481887819603e-01 1.324277465820309999e+03 1.954197645187379928e+00 4.000000000000000000e+00 8.499434814453120453e+02 -1.232500000000000000e+02 5.325000000000000000e+01
1.700000000000000000e+01 5.887923076923079861e+02 2.855379943847660229e+02 -1.697174072265619893e+00 0.000000000000000000e+00 1.764705926179890028e-01 1.312491821289059999e+03 2.010566473007199928e+00 1.000000000000000000e+00 7.447448120117189774e+02 -1.227500000000000000e+02 5.325000000000000000e+01
6.900000000000000000e+01 7.476846153846149718e+02 2.889152221679689774e+02 -1.824829101562500000e+00 0.000000000000000000e+00 2.857142857142859829e-02 1.300706054687500000e+03 1.652362704277039906e+00 4.000000000000000000e+00 9.447837524414060226e+02 -1.222500000000000000e+02 5.325000000000000000e+01
6.600000000000000000e+01 8.997153846153839822e+02 3.078505554199219887e+02 -1.970581054687500000e+00 9.999999776482580358e-03 5.714285714285709944e-02 1.280999633789059999e+03 1.258212924003599964e+00 4.000000000000000000e+00 1.163463012695309999e+03 -1.217500000000000000e+02 5.325000000000000000e+01
3.000000000000000000e+00 9.226153846153839595e+02 3.060389709472660229e+02 -2.370635986328120115e+00 4.221104085445400167e-01 0.000000000000000000e+00 1.194062377929690001e+03 7.577629685401919835e-01 1.000000000000000000e+00 1.552817871093750000e+03 -1.207500000000000000e+02 5.325000000000000000e+01
6.500000000000000000e+01 8.289384615384609560e+02 2.850794067382810226e+02 -2.570648193359379885e+00 1.546230912208559904e-01 1.142857142857140046e-01 1.150593750000000000e+03 1.357347607612610085e+00 4.000000000000000000e+00 1.397042968750000000e+03 -1.202500000000000000e+02 5.325000000000000000e+01
1.000000000000000000e+00 8.825461538461539703e+02 2.705591430664060226e+02 -2.667236328125000000e+00 5.548105239868159622e-01 2.857142857142859829e-02 1.138822753906250000e+03 1.095034003257749911e+00 1.000000000000000000e+00 1.980379150390619998e+03 -1.197500000000000000e+02 5.325000000000000000e+01
6.000000000000000000e+00 8.363000000000009777e+02 2.493819427490230112e+02 -2.660400390625000000e+00 3.087928295135500267e-01 8.571428571428570120e-02 1.158749511718750000e+03 1.032964348793030007e+00 1.000000000000000000e+00 1.998291625976559999e+03 -1.192500000000000000e+02 5.325000000000000000e+01
7.600000000000000000e+01 7.194846153846150401e+02 2.147096557617190058e+02 -2.646728515625000000e+00 0.000000000000000000e+00 2.285714285714290084e-01 1.198603027343750000e+03 1.500489592552189944e+00 4.000000000000000000e+00 1.599635742187500000e+03 -1.182500000000000000e+02 5.325000000000000000e+01
5.200000000000000000e+01 6.138923076923080089e+02 2.119494476318359943e+02 -2.433807373046879885e+00 0.000000000000000000e+00 5.714285714285709944e-02 1.274531616210940001e+03 1.669128417968750000e+00 4.000000000000000000e+00 1.322569580078119998e+03 -1.177500000000000000e+02 5.325000000000000000e+01
2.800000000000000000e+01 6.093846153846150173e+02 2.193148193359380116e+02 -2.152221679687500000e+00 0.000000000000000000e+00 0.000000000000000000e+00 1.369127441406250000e+03 1.778084278106689897e+00 3.000000000000000000e+00 1.268942138671880002e+03 -1.172500000000000000e+02 5.325000000000000000e+01
4.300000000000000000e+01 5.863230769230769965e+02 2.307404174804690058e+02 -1.870605468750000000e+00 0.000000000000000000e+00 2.857142857142859829e-02 1.463723388671880002e+03 1.865571975708010033e+00 3.000000000000000000e+00 1.138230712890619998e+03 -1.167500000000000000e+02 5.325000000000000000e+01
7.000000000000000000e+01 5.710846153846149491e+02 2.379966125488280113e+02 -1.588989257812500000e+00 0.000000000000000000e+00 0.000000000000000000e+00 1.558319213867190001e+03 1.887607455253599964e+00 4.000000000000000000e+00 1.079693481445309999e+03 -1.162500000000000000e+02 5.325000000000000000e+01
4.300000000000000000e+01 5.672615384615389758e+02 2.327539215087890057e+02 -1.324645996093750000e+00 0.000000000000000000e+00 1.428571428571429880e-01 1.644804199218750000e+03 1.476237535476679907e+00 3.000000000000000000e+00 9.780343017578120453e+02 -1.157500000000000000e+02 5.325000000000000000e+01
3.900000000000000000e+01 5.593230769230769965e+02 2.225121154785159945e+02 -1.060272216796880107e+00 0.000000000000000000e+00 2.857142857142859829e-02 1.731289184570309999e+03 2.208189725875850051e+00 3.000000000000000000e+00 8.862611694335939774e+02 -1.152500000000000000e+02 5.325000000000000000e+01
3.800000000000000000e+01 4.108538461538460069e+02 1.888210296630859943e+02 -3.889160156250000000e-01 0.000000000000000000e+00 0.000000000000000000e+00 2.396406982421880002e+03 3.154842615127559924e+00 3.000000000000000000e+00 7.477438964843750000e+02 -1.077500000000000000e+02 5.325000000000000000e+01
3.400000000000000000e+01 4.044923076923079748e+02 2.049480438232419885e+02 -6.776123046875000000e-01 0.000000000000000000e+00 8.235294222831730515e-01 2.371646240234380002e+03 3.168606281280519799e+00 3.000000000000000000e+00 6.540908813476560226e+02 -1.072500000000000000e+02 5.325000000000000000e+01
1.200000000000000000e+01 4.273538461538460069e+02 2.257312927246090055e+02 -1.316223144531250000e+00 0.000000000000000000e+00 1.470588207244869938e+00 2.310217529296880002e+03 3.216004371643069959e+00 1.000000000000000000e+00 4.555774536132810226e+02 -1.057500000000000000e+02 5.325000000000000000e+01
3.100000000000000000e+01 4.550538461538459956e+02 1.976864624023440058e+02 -1.592742919921880107e+00 0.000000000000000000e+00 6.470588445663449928e-01 2.283607177734380002e+03 1.848659396171570046e+00 3.000000000000000000e+00 4.263945617675780113e+02 -1.047500000000000000e+02 5.325000000000000000e+01
4.300000000000000000e+01 4.801461538461539931e+02 2.216102600097659945e+02 -1.490631103515619893e+00 9.999999776482580358e-03 5.714285714285709944e-02 2.306036865234380002e+03 9.553409218788150303e-01 3.000000000000000000e+00 5.333898925781250000e+02 -1.027500000000000000e+02 5.325000000000000000e+01
6.200000000000000000e+01 4.875153846153850168e+02 2.384967193603519888e+02 -1.397003173828119893e+00 9.999999776482580358e-03 1.428571428571429880e-01 2.318942626953119998e+03 1.524796128273010032e+00 4.000000000000000000e+00 5.803774414062500000e+02 -1.022500000000000000e+02 5.325000000000000000e+01
3.000000000000000000e+01 4.782615384615389758e+02 2.245132293701169885e+02 -1.303375244140619893e+00 0.000000000000000000e+00 2.285714285714290084e-01 2.331848632812500000e+03 2.042661905288699842e+00 3.000000000000000000e+00 3.051187744140619884e+02 -1.017500000000000000e+02 5.325000000000000000e+01
3.100000000000000000e+01 4.922461538461540158e+02 1.914135589599609943e+02 -1.209747314453119893e+00 0.000000000000000000e+00 2.857142857142859829e-02 2.344754638671880002e+03 2.058164358139039862e+00 3.000000000000000000e+00 2.636670227050780113e+02 -1.012500000000000000e+02 5.325000000000000000e+01
6.000000000000000000e+01 1.824230769230769965e+03 5.665700683593750000e+02 8.202392578125000000e+00 0.000000000000000000e+00 0.000000000000000000e+00 3.121462646484380002e+03 2.228686094284059838e+00 4.000000000000000000e+00 3.703970336914060226e+02 -1.327500000000000000e+02 5.375000000000000000e+01
2.400000000000000000e+01 2.663823076923079952e+03 5.959166259765620453e+02 2.552368164062500000e+00 0.000000000000000000e+00 0.000000000000000000e+00 1.605722900390619998e+03 1.964889526367189942e+00 3.000000000000000000e+00 7.572944335937500000e+02 -1.292500000000000000e+02 5.375000000000000000e+01
5.900000000000000000e+01 2.348869230769229944e+03 6.053610839843750000e+02 1.823028564453119893e+00 0.000000000000000000e+00 0.000000000000000000e+00 1.495055664062500000e+03 1.523792624473570001e+00 4.000000000000000000e+00 3.757812805175780113e+02 -1.287500000000000000e+02 5.375000000000000000e+01
6.300000000000000000e+01 1.914569230769229989e+03 6.090539550781250000e+02 1.093658447265619893e+00 0.000000000000000000e+00 0.000000000000000000e+00 1.384388427734380002e+03 8.885974884033199794e-01 4.000000000000000000e+00 8.666544189453120453e+02 -1.282500000000000000e+02 5.375000000000000000e+01
1.100000000000000000e+01 1.601423076923080089e+03 5.803416137695310226e+02 3.643188476562500000e-01 1.828354895114900069e-01 0.000000000000000000e+00 1.273721313476559999e+03 7.930898070335390404e-01 1.000000000000000000e+00 1.399519775390619998e+03 -1.277500000000000000e+02 5.375000000000000000e+01
1.000000000000000000e+00 1.271876923076920093e+03 5.051884460449219887e+02 -1.385192871093750000e-01 9.999999776482580358e-03 5.882353186607359730e-01 1.230705322265619998e+03 1.598608016967770107e+00 1.000000000000000000e+00 1.674663330078119998e+03 -1.272500000000000000e+02 5.375000000000000000e+01
3.800000000000000000e+01 8.744384615384609560e+02 4.132690734863280113e+02 -4.147949218750000000e-01 0.000000000000000000e+00 5.294117927551269531e-01 1.255340698242190001e+03 1.750711202621459961e+00 3.000000000000000000e+00 9.131380615234379547e+02 -1.267500000000000000e+02 5.375000000000000000e+01
5.400000000000000000e+01 4.703153846153850282e+02 2.471253204345699999e+02 -9.673767089843750000e-01 0.000000000000000000e+00 8.571428571428570120e-02 1.304611328125000000e+03 1.851414203643799938e+00 4.000000000000000000e+00 8.970708618164060226e+02 -1.257500000000000000e+02 5.375000000000000000e+01
2.600000000000000000e+01 4.934153846153849940e+02 2.306769561767580115e+02 -1.137817382812500000e+00 9.999999776482580358e-03 1.058823585510249909e+00 1.320366088867190001e+03 1.870403885841370073e+00 3.000000000000000000e+00 8.614681396484379547e+02 -1.252500000000000000e+02 5.375000000000000000e+01
3.000000000000000000e+01 5.066307692307689763e+02 2.624559020996089771e+02 -1.273010253906250000e+00 0.000000000000000000e+00 7.647058963775630325e-01 1.333160644531250000e+03 1.896314620971679910e+00 3.000000000000000000e+00 7.740490722656250000e+02 -1.247500000000000000e+02 5.375000000000000000e+01
6.200000000000000000e+01 5.126615384615389530e+02 2.979802246093750000e+02 -1.408172607421880107e+00 9.999999776482580358e-03 5.882353186607359730e-01 1.345955200195309999e+03 1.893358826637270065e+00 4.000000000000000000e+00 1.295022827148440001e+03 -1.242500000000000000e+02 5.375000000000000000e+01
5.800000000000000000e+01 5.215153846153849599e+02 3.206785888671880116e+02 -1.543334960937500000e+00 0.000000000000000000e+00 2.352941185235979948e-01 1.358749755859380002e+03 1.918133378028870073e+00 4.000000000000000000e+00 9.287236328125000000e+02 -1.237500000000000000e+02 5.375000000000000000e+01
4.200000000000000000e+01 5.644153846153850509e+02 3.331824951171880116e+02 -1.577453613281250000e+00 0.000000000000000000e+00 2.352941185235979948e-01 1.354425415039059999e+03 1.983635544776920057e+00 3.000000000000000000e+00 8.375258178710939774e+02 -1.232500000000000000e+02 5.375000000000000000e+01
2.300000000000000000e+01 6.213923076923080089e+02 3.397463989257810226e+02 -1.611572265625000000e+00 0.000000000000000000e+00 5.714285714285709944e-02 1.350101074218750000e+03 2.029794931411740055e+00 3.000000000000000000e+00 7.303138427734379547e+02 -1.227500000000000000e+02 5.375000000000000000e+01
6.100000000000000000e+01 8.028076923076920366e+02 3.388968200683589771e+02 -1.645690917968750000e+00 0.000000000000000000e+00 4.705882370471949905e-01 1.345776733398440001e+03 1.930437684059139958e+00 4.000000000000000000e+00 8.211953735351560226e+02 -1.222500000000000000e+02 5.375000000000000000e+01
6.500000000000000000e+01 8.893769230769230489e+02 3.433092346191410229e+02 -1.680999755859380107e+00 0.000000000000000000e+00 2.000000000000000111e-01 1.341465942382809999e+03 1.445461988449100010e+00 4.000000000000000000e+00 8.286653442382810226e+02 -1.217500000000000000e+02 5.375000000000000000e+01
7.300000000000000000e+01 9.014692307692309896e+02 3.415502929687500000e+02 -1.719970703125000000e+00 9.999999776482580358e-03 2.352941185235979948e-01 1.337196044921880002e+03 1.545299410820009989e+00 4.000000000000000000e+00 1.031271118164059999e+03 -1.212500000000000000e+02 5.375000000000000000e+01
9.000000000000000000e+00 8.422999999999999545e+02 3.201087951660160229e+02 -1.758941650390619893e+00 9.999999776482580358e-03 1.428571428571429880e-01 1.332926269531250000e+03 1.568104386329649991e+00 1.000000000000000000e+00 1.598962402343750000e+03 -1.207500000000000000e+02 5.375000000000000000e+01
1.800000000000000000e+01 7.932307692307690559e+02 2.639593505859380116e+02 -1.805419921875000000e+00 1.695750355720520020e-01 2.941176593303679865e-01 1.336657714843750000e+03 1.494537353515619893e+00 1.000000000000000000e+00 1.835687866210940001e+03 -1.197500000000000000e+02 5.375000000000000000e+01
4.000000000000000000e+01 6.901461538461539931e+02 2.583036499023439774e+02 -1.781463623046880107e+00 3.567108809947969750e-01 2.352941185235979948e-01 1.356930297851559999e+03 1.529006600379940073e+00 3.000000000000000000e+00 1.625506713867190001e+03 -1.192500000000000000e+02 5.375000000000000000e+01
6.000000000000000000e+01 6.657384615384610242e+02 2.580595092773439774e+02 -1.757476806640619893e+00 9.999999776482580358e-03 5.714285714285709944e-02 1.377202758789059999e+03 1.546762108802800073e+00 4.000000000000000000e+00 1.675348510742190001e+03 -1.187500000000000000e+02 5.375000000000000000e+01
6.300000000000000000e+01 5.935923076923070312e+02 2.518395233154300001e+02 -1.733520507812500000e+00 9.999999776482580358e-03 5.714285714285709944e-02 1.397475341796880002e+03 1.665271282196040037e+00 4.000000000000000000e+00 1.355512939453119998e+03 -1.182500000000000000e+02 5.375000000000000000e+01
5.600000000000000000e+01 5.669384615384619792e+02 2.371907806396480112e+02 -1.581756591796880107e+00 0.000000000000000000e+00 2.857142857142859829e-02 1.457879150390619998e+03 1.804855465888979937e+00 4.000000000000000000e+00 1.256316650390619998e+03 -1.177500000000000000e+02 5.375000000000000000e+01
5.800000000000000000e+01 5.678692307692309669e+02 2.246610717773440058e+02 -1.387359619140619893e+00 0.000000000000000000e+00 2.941176593303679865e-01 1.531660034179690001e+03 1.886378288269040082e+00 4.000000000000000000e+00 1.126429321289059999e+03 -1.172500000000000000e+02 5.375000000000000000e+01
4.800000000000000000e+01 5.934615384615390212e+02 2.224442901611330115e+02 -1.192993164062500000e+00 0.000000000000000000e+00 0.000000000000000000e+00 1.605440917968750000e+03 9.736731648445130505e-01 4.000000000000000000e+00 1.049976806640619998e+03 -1.167500000000000000e+02 5.375000000000000000e+01
2.500000000000000000e+01 5.553538461538460069e+02 1.943795471191409945e+02 -7.981567382812500000e-01 0.000000000000000000e+00 5.714285714285709944e-02 1.755642333984380002e+03 1.963021159172060104e+00 3.000000000000000000e+00 8.404988403320310226e+02 -1.157500000000000000e+02 5.375000000000000000e+01
5.700000000000000000e+01 5.440923076923080544e+02 1.824221801757809942e+02 -5.976867675781250000e-01 0.000000000000000000e+00 0.000000000000000000e+00 1.832062744140619998e+03 3.076267480850220171e+00 4.000000000000000000e+00 8.188818969726560226e+02 -1.152500000000000000e+02 5.375000000000000000e+01
4.100000000000000000e+01 4.334846153846149832e+02 1.946384429931640057e+02 1.478881835937500000e-01 0.000000000000000000e+00 6.470588445663449928e-01 2.384753662109380002e+03 3.200503587722780097e+00 3.000000000000000000e+00 6.728245849609379547e+02 -1.097500000000000000e+02 5.375000000000000000e+01
4.300000000000000000e+01 4.170000000000000000e+02 1.943638916015619884e+02 -4.782104492187500000e-02 0.000000000000000000e+00 0.000000000000000000e+00 2.381192138671880002e+03 3.157144546508789951e+00 3.000000000000000000e+00 6.678251342773439774e+02 -1.092500000000000000e+02 5.375000000000000000e+01
5.900000000000000000e+01 4.152538461538459842e+02 1.932475433349609943e+02 -2.435302734375000000e-01 0.000000000000000000e+00 7.647058963775630325e-01 2.377630615234380002e+03 2.877338886260989881e+00 4.000000000000000000e+00 6.747014770507810226e+02 -1.087500000000000000e+02 5.375000000000000000e+01
4.200000000000000000e+01 4.213384615384620133e+02 1.970648345947269888e+02 -5.357666015625000000e-01 0.000000000000000000e+00 5.714285714285709944e-02 2.353157958984380002e+03 1.998007655143740013e+00 3.000000000000000000e+00 6.623675537109379547e+02 -1.082500000000000000e+02 5.375000000000000000e+01
6.100000000000000000e+01 4.369846153846149832e+02 2.494067840576169885e+02 -1.120178222656250000e+00 0.000000000000000000e+00 5.882353186607359730e-01 2.304212402343750000e+03 8.779948949813840553e-01 4.000000000000000000e+00 5.408051757812500000e+02 -1.072500000000000000e+02 5.375000000000000000e+01
5.600000000000000000e+01 4.576153846153849827e+02 3.252129821777339771e+02 -1.540863037109380107e+00 0.000000000000000000e+00 2.000000000000000111e-01 2.266510986328119998e+03 1.028364062309270022e+00 4.000000000000000000e+00 6.082765502929689774e+02 -1.062500000000000000e+02 5.375000000000000000e+01
3.600000000000000000e+01 4.554307692307689877e+02 3.177113037109380116e+02 -1.702087402343750000e+00 0.000000000000000000e+00 5.714285714285709944e-02 2.251033691406250000e+03 2.226233482360839844e+00 3.000000000000000000e+00 5.193034057617189774e+02 -1.057500000000000000e+02 5.375000000000000000e+01
3.400000000000000000e+01 4.723692307692310237e+02 2.369646759033199999e+02 -1.933349609375000000e+00 0.000000000000000000e+00 2.352941185235979948e-01 2.230100585937500000e+03 2.042297363281250000e+00 3.000000000000000000e+00 4.790211486816410229e+02 -1.047500000000000000e+02 5.375000000000000000e+01
4.000000000000000000e+01 4.828923076923080089e+02 1.974261474609380116e+02 -1.912231445312500000e+00 0.000000000000000000e+00 8.571428571428570120e-02 2.234666992187500000e+03 2.338266849517820045e+00 3.000000000000000000e+00 4.221292724609380116e+02 -1.042500000000000000e+02 5.375000000000000000e+01
5.100000000000000000e+01 4.748000000000000114e+02 1.810058746337890057e+02 -1.891143798828119893e+00 0.000000000000000000e+00 5.714285714285709944e-02 2.239233398437500000e+03 2.069356679916380060e+00 4.000000000000000000e+00 3.505427856445310226e+02 -1.037500000000000000e+02 5.375000000000000000e+01
3.600000000000000000e+01 4.780000000000000000e+02 1.824347076416019888e+02 -1.870025634765619893e+00 0.000000000000000000e+00 2.941176593303679865e-01 2.243799804687500000e+03 2.080545425415039951e+00 3.000000000000000000e+00 3.029854736328119884e+02 -1.032500000000000000e+02 5.375000000000000000e+01
3.100000000000000000e+01 4.710000000000000000e+02 2.015581207275390057e+02 -1.805938720703119893e+00 0.000000000000000000e+00 1.714285714285710138e-01 2.252499267578119998e+03 8.484027981758119896e-01 3.000000000000000000e+00 2.669806213378910229e+02 -1.027500000000000000e+02 5.375000000000000000e+01
4.800000000000000000e+01 4.672076923076920139e+02 2.187535552978519888e+02 -1.727508544921880107e+00 0.000000000000000000e+00 2.571428571428570065e-01 2.262576171875000000e+03 8.422078490257259853e-01 4.000000000000000000e+00 2.645202636718750000e+02 -1.022500000000000000e+02 5.375000000000000000e+01
3.500000000000000000e+01 4.654769230769230148e+02 2.197788696289059942e+02 -1.649078369140619893e+00 0.000000000000000000e+00 5.882353186607359730e-01 2.272653320312500000e+03 8.310616016387939453e-01 3.000000000000000000e+00 2.642249450683589771e+02 -1.017500000000000000e+02 5.375000000000000000e+01
2.500000000000000000e+01 4.639692307692309896e+02 2.141559906005859943e+02 -1.570648193359380107e+00 0.000000000000000000e+00 5.882353186607359730e-01 2.282730224609380002e+03 3.041016101837159979e+00 3.000000000000000000e+00 2.642946777343750000e+02 -1.012500000000000000e+02 5.375000000000000000e+01
4.400000000000000000e+01 2.392853846153850100e+03 6.229363403320310226e+02 2.212921142578120115e+00 0.000000000000000000e+00 0.000000000000000000e+00 1.495120727539059999e+03 1.889861822128299895e+00 3.000000000000000000e+00 4.260214538574219887e+02 -1.297500000000000000e+02 5.425000000000000000e+01
3.100000000000000000e+01 2.011284615384620110e+03 6.201161499023439774e+02 1.127807617187500000e+00 0.000000000000000000e+00 2.352941185235979948e-01 1.256769042968750000e+03 1.168316125869750088e+00 3.000000000000000000e+00 8.102382202148439774e+02 -1.292500000000000000e+02 5.425000000000000000e+01
5.500000000000000000e+01 1.169292307692310033e+03 5.365327148437500000e+02 -4.027099609375000000e-01 0.000000000000000000e+00 2.352941185235979948e-01 1.184128417968750000e+03 1.106135249137879972e+00 4.000000000000000000e+00 1.058787597656250000e+03 -1.277500000000000000e+02 5.425000000000000000e+01
5.900000000000000000e+01 8.980230769230770420e+02 4.331143493652339771e+02 -7.785949707031250000e-01 9.999999776482580358e-03 1.428571428571429880e-01 1.186514160156250000e+03 1.683061242103579991e+00 4.000000000000000000e+00 1.058673339843750000e+03 -1.272500000000000000e+02 5.425000000000000000e+01
4.600000000000000000e+01 4.532153846153850054e+02 2.537012023925780113e+02 -1.503295898437500000e+00 0.000000000000000000e+00 5.714285714285709944e-02 1.273469360351559999e+03 1.864788532257080078e+00 4.000000000000000000e+00 8.295634155273439774e+02 -1.257500000000000000e+02 5.425000000000000000e+01
7.100000000000000000e+01 5.142846153846149946e+02 2.907882080078119884e+02 -1.601562500000000000e+00 9.999999776482580358e-03 4.705882370471949905e-01 1.327718627929690001e+03 1.883955955505369984e+00 4.000000000000000000e+00 1.142449218750000000e+03 -1.247500000000000000e+02 5.425000000000000000e+01
5.100000000000000000e+01 5.070307692307690104e+02 3.192312316894530113e+02 -1.623229980468750000e+00 0.000000000000000000e+00 5.714285714285709944e-02 1.354577514648440001e+03 1.934299349784849964e+00 4.000000000000000000e+00 8.430039672851560226e+02 -1.242500000000000000e+02 5.425000000000000000e+01
5.800000000000000000e+01 5.645769230769229807e+02 3.434206848144530113e+02 -1.644866943359380107e+00 0.000000000000000000e+00 2.352941185235979948e-01 1.381436401367190001e+03 1.940465211868289908e+00 4.000000000000000000e+00 8.063142089843750000e+02 -1.237500000000000000e+02 5.425000000000000000e+01
6.100000000000000000e+01 8.194769230769229580e+02 3.701127319335939774e+02 -1.466522216796880107e+00 0.000000000000000000e+00 2.352941185235979948e-01 1.390847412109380002e+03 7.928029298782349743e-01 4.000000000000000000e+00 8.196701049804689774e+02 -1.222500000000000000e+02 5.425000000000000000e+01
3.600000000000000000e+01 8.633846153846150173e+02 3.642395629882810226e+02 -1.391418457031250000e+00 0.000000000000000000e+00 1.428571428571429880e-01 1.401932373046880002e+03 1.157819032669070047e+00 3.000000000000000000e+00 8.365414428710939774e+02 -1.217500000000000000e+02 5.425000000000000000e+01
5.600000000000000000e+01 8.133076923076920366e+02 3.253720092773439774e+02 -1.147247314453119893e+00 9.999999776482580358e-03 5.714285714285709944e-02 1.471790039062500000e+03 8.663640022277829811e-01 4.000000000000000000e+00 1.584596801757809999e+03 -1.207500000000000000e+02 5.425000000000000000e+01
6.400000000000000000e+01 7.602230769230769738e+02 2.768089294433589771e+02 -1.025177001953119893e+00 9.999999776482580358e-03 5.714285714285709944e-02 1.506718994140619998e+03 1.555270791053769974e+00 4.000000000000000000e+00 1.312525268554690001e+03 -1.202500000000000000e+02 5.425000000000000000e+01
6.000000000000000000e+01 6.871461538461539931e+02 2.587759399414060226e+02 -9.435729980468750000e-01 9.999999776482580358e-03 8.571428571428570120e-02 1.534492553710940001e+03 1.610280632972719950e+00 4.000000000000000000e+00 1.446464111328119998e+03 -1.197500000000000000e+02 5.425000000000000000e+01
6.500000000000000000e+01 5.978307692307689649e+02 2.528705749511719887e+02 -9.024963378906250000e-01 0.000000000000000000e+00 2.857142857142859829e-02 1.555110961914059999e+03 1.736785531044009900e+00 4.000000000000000000e+00 1.183712890625000000e+03 -1.192500000000000000e+02 5.425000000000000000e+01
5.400000000000000000e+01 5.350153846153849599e+02 2.548098907470699999e+02 -8.614196777343750000e-01 0.000000000000000000e+00 2.857142857142859829e-02 1.575729248046880002e+03 1.865986943244930085e+00 4.000000000000000000e+00 1.057339721679690001e+03 -1.187500000000000000e+02 5.425000000000000000e+01
4.500000000000000000e+01 5.578615384615379753e+02 2.548353424072269888e+02 -8.203125000000000000e-01 9.999999776482580358e-03 0.000000000000000000e+00 1.596347656250000000e+03 1.874262452125549983e+00 4.000000000000000000e+00 1.192013305664059999e+03 -1.182500000000000000e+02 5.425000000000000000e+01
7.200000000000000000e+01 5.879384615384619792e+02 2.404121551513669885e+02 -7.296752929687500000e-01 0.000000000000000000e+00 2.857142857142859829e-02 1.641226684570309999e+03 1.904928922653200019e+00 4.000000000000000000e+00 1.176442749023440001e+03 -1.177500000000000000e+02 5.425000000000000000e+01
5.300000000000000000e+01 5.736461538461539931e+02 2.154381103515619884e+02 -6.225280761718750000e-01 0.000000000000000000e+00 2.857142857142859829e-02 1.694192626953119998e+03 1.774364352226259989e+00 4.000000000000000000e+00 9.970269775390620453e+02 -1.172500000000000000e+02 5.425000000000000000e+01
6.900000000000000000e+01 5.689615384615379980e+02 1.926063079833980112e+02 -5.153808593750000000e-01 0.000000000000000000e+00 4.117647111415860262e-01 1.747158569335940001e+03 1.988475799560549984e+00 4.000000000000000000e+00 9.369700927734379547e+02 -1.167500000000000000e+02 5.425000000000000000e+01
5.500000000000000000e+01 5.593923076923080089e+02 1.694429931640619884e+02 -4.082031250000000000e-01 0.000000000000000000e+00 2.857142857142859829e-02 1.800124511718750000e+03 1.963327646255490055e+00 4.000000000000000000e+00 7.964678955078120453e+02 -1.162500000000000000e+02 5.425000000000000000e+01
6.200000000000000000e+01 5.522692307692309441e+02 1.530361938476559942e+02 -2.716369628906250000e-01 0.000000000000000000e+00 2.857142857142859829e-02 1.866480468750000000e+03 1.315098643302919923e+00 4.000000000000000000e+00 8.367655639648439774e+02 -1.157500000000000000e+02 5.425000000000000000e+01
2.800000000000000000e+01 5.242384615384610242e+02 1.552799530029300001e+02 -1.350708007812500000e-01 0.000000000000000000e+00 5.882352963089940157e-02 1.932836425781250000e+03 1.951416134834289995e+00 3.000000000000000000e+00 7.349612426757810226e+02 -1.152500000000000000e+02 5.425000000000000000e+01
1.500000000000000000e+01 4.739230769230770193e+02 1.623808135986330115e+02 1.495361328125000000e-03 0.000000000000000000e+00 0.000000000000000000e+00 1.999192260742190001e+03 3.113248109817499998e+00 1.000000000000000000e+00 6.929471435546879547e+02 -1.147500000000000000e+02 5.425000000000000000e+01
4.000000000000000000e+00 4.666615384615390099e+02 1.705294342041019888e+02 2.985229492187500000e-01 0.000000000000000000e+00 0.000000000000000000e+00 2.225949462890619998e+03 3.198365211486819959e+00 1.000000000000000000e+00 6.735417480468750000e+02 -1.127500000000000000e+02 5.425000000000000000e+01
2.500000000000000000e+01 4.494923076923079748e+02 1.552350921630859943e+02 3.103027343750000000e-01 0.000000000000000000e+00 1.764705926179890028e-01 2.265588378906250000e+03 3.196536302566530097e+00 3.000000000000000000e+00 6.750285644531250000e+02 -1.122500000000000000e+02 5.425000000000000000e+01
3.900000000000000000e+01 4.337461538461540158e+02 1.996084136962890057e+02 -2.127990722656250000e-01 0.000000000000000000e+00 2.285714285714290084e-01 2.329022460937500000e+03 3.089231491088869852e+00 3.000000000000000000e+00 5.469545288085939774e+02 -1.097500000000000000e+02 5.425000000000000000e+01
5.000000000000000000e+00 4.298615384615379753e+02 1.979196014404300001e+02 -4.441833496093750000e-01 0.000000000000000000e+00 5.882353186607359730e-01 2.319177734375000000e+03 3.161396980285640090e+00 1.000000000000000000e+00 5.112251586914060226e+02 -1.092500000000000000e+02 5.425000000000000000e+01
2.500000000000000000e+01 4.218461538461539817e+02 2.090451049804690058e+02 -9.712829589843750000e-01 0.000000000000000000e+00 2.352941185235979948e-01 2.285148193359380002e+03 1.442680120468140093e+00 3.000000000000000000e+00 4.675541076660160229e+02 -1.082500000000000000e+02 5.425000000000000000e+01
5.400000000000000000e+01 4.252384615384610242e+02 2.288722381591800001e+02 -1.267028808593750000e+00 0.000000000000000000e+00 1.142857142857140046e-01 2.260963378906250000e+03 1.873587489128109906e+00 4.000000000000000000e+00 4.789421691894530113e+02 -1.077500000000000000e+02 5.425000000000000000e+01
6.600000000000000000e+01 4.662307692307689990e+02 3.304971618652339771e+02 -1.818267822265619893e+00 0.000000000000000000e+00 2.941176593303679865e-01 2.215663330078119998e+03 1.989332556724549894e+00 4.000000000000000000e+00 5.367565917968750000e+02 -1.067500000000000000e+02 5.425000000000000000e+01
5.600000000000000000e+01 4.954076923076930257e+02 3.297671508789060226e+02 -2.222747802734379885e+00 9.999999776482580358e-03 5.714285714285709944e-02 2.179942871093750000e+03 1.951632738113399990e+00 4.000000000000000000e+00 5.831254882812500000e+02 -1.052500000000000000e+02 5.425000000000000000e+01
4.000000000000000000e+01 5.028307692307690218e+02 2.848069152832030113e+02 -2.273956298828120115e+00 9.999999776482580358e-03 5.714285714285709944e-02 2.176594238281250000e+03 1.946590304374689939e+00 3.000000000000000000e+00 6.294907226562500000e+02 -1.047500000000000000e+02 5.425000000000000000e+01
3.800000000000000000e+01 5.070538461538459956e+02 2.427751770019530113e+02 -2.241577148437500000e+00 9.999999776482580358e-03 2.857142857142859829e-02 2.181803955078119998e+03 1.966237902641299939e+00 3.000000000000000000e+00 4.366341857910160229e+02 -1.042500000000000000e+02 5.425000000000000000e+01
4.500000000000000000e+01 4.910923076923079975e+02 2.105333862304690058e+02 -2.209167480468750000e+00 0.000000000000000000e+00 5.882353186607359730e-01 2.187013671875000000e+03 2.011622190475459870e+00 4.000000000000000000e+00 3.793629150390619884e+02 -1.037500000000000000e+02 5.425000000000000000e+01
3.200000000000000000e+01 4.963230769230769965e+02 1.980016632080080115e+02 -2.176788330078120115e+00 9.999999776482580358e-03 2.941176593303679865e-01 2.192223144531250000e+03 2.030060768127440074e+00 3.000000000000000000e+00 3.382768859863280113e+02 -1.032500000000000000e+02 5.425000000000000000e+01
3.200000000000000000e+01 4.868000000000000114e+02 2.070477905273440058e+02 -2.121246337890620115e+00 0.000000000000000000e+00 5.882353186607359730e-01 2.198961669921880002e+03 1.950233221054080035e+00 3.000000000000000000e+00 2.889776916503910229e+02 -1.027500000000000000e+02 5.425000000000000000e+01
4.200000000000000000e+01 4.839846153846160064e+02 2.196076202392580115e+02 -2.058013916015620115e+00 0.000000000000000000e+00 2.857142857142859829e-02 2.206209716796880002e+03 2.049456596374509942e+00 3.000000000000000000e+00 2.831292419433589771e+02 -1.022500000000000000e+02 5.425000000000000000e+01
5.100000000000000000e+01 1.586200000000000045e+03 6.250634765625000000e+02 -1.495361328125000000e-02 0.000000000000000000e+00 0.000000000000000000e+00 1.154341186523440001e+03 9.305621981620789684e-01 4.000000000000000000e+00 8.777457885742189774e+02 -1.292500000000000000e+02 5.475000000000000000e+01
5.200000000000000000e+01 1.268723076923080043e+03 6.026390380859379547e+02 -5.488586425781250000e-01 0.000000000000000000e+00 0.000000000000000000e+00 1.129641601562500000e+03 7.736005783081050247e-01 4.000000000000000000e+00 6.103237915039060226e+02 -1.287500000000000000e+02 5.475000000000000000e+01
4.700000000000000000e+01 1.009046153846149991e+03 5.694449462890620453e+02 -1.082733154296880107e+00 0.000000000000000000e+00 5.882352963089940157e-02 1.104942138671880002e+03 1.107493281364440030e+00 4.000000000000000000e+00 4.039832458496089771e+02 -1.282500000000000000e+02 5.475000000000000000e+01
6.100000000000000000e+01 8.459769230769229580e+02 4.634009704589839771e+02 -1.616607666015619893e+00 2.736051976680760056e-01 5.882353186607359730e-01 1.080242553710940001e+03 1.634582757949829990e+00 4.000000000000000000e+00 1.353000732421880002e+03 -1.277500000000000000e+02 5.475000000000000000e+01
6.200000000000000000e+01 6.219538461538460297e+02 3.129010009765619884e+02 -1.966461181640619893e+00 9.999999776482580358e-03 2.857142857142859829e-02 1.086026367187500000e+03 1.304059147834780052e+00 4.000000000000000000e+00 9.856036376953120453e+02 -1.272500000000000000e+02 5.475000000000000000e+01
5.400000000000000000e+01 5.261076923076919911e+02 2.660602722167969887e+02 -2.132324218750000000e+00 9.999999776482580358e-03 8.571428571428570120e-02 1.122293579101559999e+03 1.709089279174800025e+00 4.000000000000000000e+00 1.310877075195309999e+03 -1.267500000000000000e+02 5.475000000000000000e+01
7.300000000000000000e+01 4.891692307692309782e+02 2.552425842285159945e+02 -2.298187255859379885e+00 0.000000000000000000e+00 3.529411852359770063e-01 1.158560668945309999e+03 1.770827889442440073e+00 4.000000000000000000e+00 9.407410888671879547e+02 -1.262500000000000000e+02 5.475000000000000000e+01
6.300000000000000000e+01 4.745153846153850168e+02 2.520854187011719887e+02 -2.464050292968750000e+00 0.000000000000000000e+00 2.941176593303679865e-01 1.194827880859380002e+03 9.127161502838130325e-01 4.000000000000000000e+00 9.897807617187500000e+02 -1.257500000000000000e+02 5.475000000000000000e+01
6.000000000000000000e+01 5.186307692307690331e+02 2.992244567871089771e+02 -2.348815917968750000e+00 0.000000000000000000e+00 3.529411852359770063e-01 1.267526123046880002e+03 9.186529517173770421e-01 4.000000000000000000e+00 7.634437866210939774e+02 -1.247500000000000000e+02 5.475000000000000000e+01
6.000000000000000000e+01 5.702692307692309441e+02 3.357683105468750000e+02 -2.259246826171879885e+00 0.000000000000000000e+00 0.000000000000000000e+00 1.303887084960940001e+03 1.328642010688779962e+00 4.000000000000000000e+00 8.441470947265620453e+02 -1.242500000000000000e+02 5.475000000000000000e+01
4.000000000000000000e+01 6.252769230769230262e+02 3.616957092285160229e+02 -2.169708251953120115e+00 0.000000000000000000e+00 2.941176593303679865e-01 1.340247924804690001e+03 1.851057648658749999e+00 3.000000000000000000e+00 9.062500610351560226e+02 -1.237500000000000000e+02 5.475000000000000000e+01
7.200000000000000000e+01 6.945846153846149491e+02 3.760482788085939774e+02 -1.976501464843750000e+00 0.000000000000000000e+00 8.571428571428570120e-02 1.370020996093750000e+03 1.191948533058170057e+00 4.000000000000000000e+00 9.717789916992189774e+02 -1.232500000000000000e+02 5.475000000000000000e+01
5.400000000000000000e+01 7.767307692307690559e+02 3.783683776855469887e+02 -1.783264160156250000e+00 0.000000000000000000e+00 5.714285714285709944e-02 1.399794067382809999e+03 7.583245635032650478e-01 4.000000000000000000e+00 8.185990600585939774e+02 -1.227500000000000000e+02 5.475000000000000000e+01
6.200000000000000000e+01 8.430769230769229807e+02 3.761884460449219887e+02 -1.590057373046880107e+00 9.999999776482580358e-03 5.294117927551269531e-01 1.429567016601559999e+03 7.199212908744809791e-01 4.000000000000000000e+00 1.100285278320309999e+03 -1.222500000000000000e+02 5.475000000000000000e+01
5.600000000000000000e+01 8.415615384615390440e+02 3.664247436523439774e+02 -1.403228759765619893e+00 0.000000000000000000e+00 0.000000000000000000e+00 1.463127197265619998e+03 6.613231897354130417e-01 4.000000000000000000e+00 1.137906250000000000e+03 -1.217500000000000000e+02 5.475000000000000000e+01
5.800000000000000000e+01 8.027230769230769738e+02 3.378570556640619884e+02 -1.235626220703119893e+00 0.000000000000000000e+00 0.000000000000000000e+00 1.508048706054690001e+03 1.276288270950320047e+00 4.000000000000000000e+00 1.063778686523440001e+03 -1.212500000000000000e+02 5.475000000000000000e+01
5.800000000000000000e+01 7.450384615384620020e+02 2.832056884765619884e+02 -1.067993164062500000e+00 1.790191978216169877e-01 1.714285714285710138e-01 1.552970214843750000e+03 1.629390001296999957e+00 4.000000000000000000e+00 1.230170532226559999e+03 -1.207500000000000000e+02 5.475000000000000000e+01
6.200000000000000000e+01 6.571615384615389530e+02 2.348022766113280113e+02 -9.003906250000000000e-01 9.999999776482580358e-03 5.882353186607359730e-01 1.597891845703119998e+03 1.741160035133360040e+00 4.000000000000000000e+00 1.186976074218750000e+03 -1.202500000000000000e+02 5.475000000000000000e+01
6.400000000000000000e+01 5.665384615384620020e+02 2.187722625732419885e+02 -7.917480468750000000e-01 0.000000000000000000e+00 1.176470592617989974e-01 1.633279907226559999e+03 1.154483675956730071e+00 4.000000000000000000e+00 9.322875976562500000e+02 -1.197500000000000000e+02 5.475000000000000000e+01
6.100000000000000000e+01 5.293230769230769965e+02 2.160241241455080115e+02 -7.420959472656250000e-01 0.000000000000000000e+00 0.000000000000000000e+00 1.659134521484380002e+03 8.494231700897220128e-01 4.000000000000000000e+00 8.362858886718750000e+02 -1.192500000000000000e+02 5.475000000000000000e+01
4.800000000000000000e+01 5.066230769230770079e+02 2.179339294433590055e+02 -6.924438476562500000e-01 0.000000000000000000e+00 2.857142857142859829e-02 1.684989135742190001e+03 9.390492439270019531e-01 4.000000000000000000e+00 7.976267700195310226e+02 -1.187500000000000000e+02 5.475000000000000000e+01
5.600000000000000000e+01 5.143769230769230489e+02 2.212828216552730112e+02 -6.427917480468750000e-01 0.000000000000000000e+00 2.857142857142859829e-02 1.710843750000000000e+03 1.389008402824400079e+00 4.000000000000000000e+00 8.112744750976560226e+02 -1.182500000000000000e+02 5.475000000000000000e+01
5.700000000000000000e+01 5.377384615384610242e+02 2.184209899902340055e+02 -5.738830566406250000e-01 0.000000000000000000e+00 2.857142857142859829e-02 1.751710083007809999e+03 8.188912272453310326e-01 4.000000000000000000e+00 7.382199096679689774e+02 -1.177500000000000000e+02 5.475000000000000000e+01
6.400000000000000000e+01 5.277307692307690559e+02 1.811452331542969887e+02 -4.231872558593750000e-01 0.000000000000000000e+00 5.714285714285709944e-02 1.843450683593750000e+03 1.197006940841669920e+00 4.000000000000000000e+00 7.702455444335939774e+02 -1.167500000000000000e+02 5.475000000000000000e+01
2.100000000000000000e+01 5.444153846153850509e+02 1.648798065185550001e+02 -3.478393554687500000e-01 0.000000000000000000e+00 2.857142857142859829e-02 1.889320922851559999e+03 1.916985392570500046e+00 3.000000000000000000e+00 9.257758178710939774e+02 -1.162500000000000000e+02 5.475000000000000000e+01
3.200000000000000000e+01 5.450538461538460524e+02 1.686778717041019888e+02 -1.788940429687500000e-01 9.999999776482580358e-03 5.714285714285709944e-02 1.996572021484380002e+03 1.855414390563959959e+00 3.000000000000000000e+00 1.087904541015619998e+03 -1.152500000000000000e+02 5.475000000000000000e+01
3.400000000000000000e+01 5.034076923076920025e+02 1.739291839599609943e+02 -9.442138671875000000e-02 0.000000000000000000e+00 1.176470592617989974e-01 2.050197509765619998e+03 1.282096385955810103e+00 3.000000000000000000e+00 7.535894165039060226e+02 -1.147500000000000000e+02 5.475000000000000000e+01
2.000000000000000000e+01 4.927076923076929802e+02 1.741044464111330115e+02 -2.798461914062500000e-02 0.000000000000000000e+00 5.714285714285709944e-02 2.100729736328119998e+03 2.195562601089480204e+00 3.000000000000000000e+00 6.065316162109379547e+02 -1.142500000000000000e+02 5.475000000000000000e+01
5.500000000000000000e+01 4.991076923076919911e+02 1.625764770507809942e+02 -1.565551757812500000e-02 0.000000000000000000e+00 2.857142857142859829e-02 2.141981689453119998e+03 8.475069999694819778e-01 4.000000000000000000e+00 6.839943847656250000e+02 -1.137500000000000000e+02 5.475000000000000000e+01
6.300000000000000000e+01 4.656461538461539931e+02 1.212235488891599999e+02 8.972167968750000000e-03 0.000000000000000000e+00 5.882352963089940157e-02 2.224485595703119998e+03 3.129342794418330076e+00 4.000000000000000000e+00 5.936559448242189774e+02 -1.127500000000000000e+02 5.475000000000000000e+01
5.200000000000000000e+01 4.661384615384620247e+02 1.064307098388670028e+02 -1.007995605468750000e-01 0.000000000000000000e+00 5.714285714285709944e-02 2.266419433593750000e+03 3.034026145935059926e+00 4.000000000000000000e+00 6.084114379882810226e+02 -1.117500000000000000e+02 5.475000000000000000e+01
6.500000000000000000e+01 4.615153846153850168e+02 1.335354461669919885e+02 -1.781005859375000000e-01 0.000000000000000000e+00 8.571428571428570120e-02 2.280624511718750000e+03 9.539394378662110485e-01 4.000000000000000000e+00 6.267232055664060226e+02 -1.112500000000000000e+02 5.475000000000000000e+01
3.800000000000000000e+01 4.425461538461540272e+02 1.652392120361330115e+02 -2.554016113281250000e-01 0.000000000000000000e+00 5.714285714285709944e-02 2.294829589843750000e+03 1.412246704101560058e+00 3.000000000000000000e+00 6.421318969726560226e+02 -1.107500000000000000e+02 5.475000000000000000e+01
4.000000000000000000e+01 4.375615384615380208e+02 1.863352966308590055e+02 -9.489746093750000000e-01 0.000000000000000000e+00 1.428571428571429880e-01 2.257318115234380002e+03 1.983464479446410023e+00 3.000000000000000000e+00 6.463036499023439774e+02 -1.092500000000000000e+02 5.475000000000000000e+01
3.600000000000000000e+01 4.415461538461540272e+02 1.971849517822269888e+02 -1.194152832031250000e+00 9.999999776482580358e-03 2.571428571428570065e-01 2.242386230468750000e+03 1.513571977615359998e+00 3.000000000000000000e+00 7.343743896484379547e+02 -1.087500000000000000e+02 5.475000000000000000e+01
3.400000000000000000e+01 4.307923076923079861e+02 2.088685607910159945e+02 -1.475128173828119893e+00 0.000000000000000000e+00 5.714285714285709944e-02 2.218310302734380002e+03 1.794139027595520020e+00 3.000000000000000000e+00 4.787547302246089771e+02 -1.082500000000000000e+02 5.475000000000000000e+01
5.000000000000000000e+01 4.750923076923079975e+02 3.047914123535160229e+02 -2.277740478515620115e+00 9.999999776482580358e-03 5.882353186607359730e-01 2.149018066406250000e+03 1.971734881401060013e+00 4.000000000000000000e+00 4.757207641601560226e+02 -1.067500000000000000e+02 5.475000000000000000e+01
3.400000000000000000e+01 4.975153846153839936e+02 3.226930541992189774e+02 -2.397766113281250000e+00 9.999999776482580358e-03 1.142857142857140046e-01 2.136686035156250000e+03 1.945840716361999956e+00 3.000000000000000000e+00 5.020732727050780113e+02 -1.062500000000000000e+02 5.475000000000000000e+01
5.500000000000000000e+01 5.109000000000010004e+02 3.166711120605469887e+02 -2.517761230468750000e+00 9.999999776482580358e-03 2.941176593303679865e-01 2.124354003906250000e+03 1.929638981819149945e+00 4.000000000000000000e+00 4.819633483886719887e+02 -1.057500000000000000e+02 5.475000000000000000e+01
7.000000000000000000e+01 5.186692307692310351e+02 3.004679565429689774e+02 -2.637756347656250000e+00 9.999999776482580358e-03 1.428571428571429880e-01 2.112021728515619998e+03 1.923698902130130062e+00 4.000000000000000000e+00 4.507072448730469887e+02 -1.052500000000000000e+02 5.475000000000000000e+01
6.800000000000000000e+01 5.109461538461540044e+02 2.848061218261719887e+02 -2.689270019531250000e+00 9.999999776482580358e-03 1.428571428571429880e-01 2.107184082031250000e+03 1.920561075210569957e+00 4.000000000000000000e+00 4.405871887207030113e+02 -1.047500000000000000e+02 5.475000000000000000e+01
7.000000000000000000e+01 5.191384615384610015e+02 2.701660766601560226e+02 -2.672302246093750000e+00 1.423114687204360129e-01 2.941176593303679865e-01 2.109841064453119998e+03 1.927935600280759942e+00 4.000000000000000000e+00 6.447095336914060226e+02 -1.042500000000000000e+02 5.475000000000000000e+01
4.500000000000000000e+01 5.082769230769230262e+02 2.440824584960940058e+02 -2.638366699218750000e+00 9.999999776482580358e-03 5.882353186607359730e-01 2.115154785156250000e+03 1.991220355033870071e+00 4.000000000000000000e+00 3.310394897460939774e+02 -1.032500000000000000e+02 5.475000000000000000e+01
6.100000000000000000e+01 5.031230769230770079e+02 2.422163085937500000e+02 -2.611175537109379885e+00 9.999999776482580358e-03 0.000000000000000000e+00 2.118689697265619998e+03 2.020468950271609998e+00 4.000000000000000000e+00 3.347200622558589771e+02 -1.027500000000000000e+02 5.475000000000000000e+01
6.400000000000000000e+01 4.927923076923079861e+02 2.438147430419919885e+02 -2.580627441406250000e+00 9.999999776482580358e-03 2.857142857142859829e-02 2.122517089843750000e+03 2.038634538650510031e+00 4.000000000000000000e+00 3.163276062011719887e+02 -1.022500000000000000e+02 5.475000000000000000e+01
4.500000000000000000e+01 4.888692307692310237e+02 2.427503051757809942e+02 -2.588104248046879885e+00 9.999999776482580358e-03 2.941176593303679865e-01 2.126924804687500000e+03 1.977965831756590021e+00 4.000000000000000000e+00 3.119559631347660229e+02 -1.007500000000000000e+02 5.475000000000000000e+01
5.700000000000000000e+01 2.102892307692310169e+03 6.739288330078120453e+02 1.710144042968750000e+00 0.000000000000000000e+00 0.000000000000000000e+00 1.534573608398440001e+03 2.016182899475099877e+00 4.000000000000000000e+00 1.348229370117190058e+02 -1.307500000000000000e+02 5.525000000000000000e+01
2.700000000000000000e+01 1.923007692307689922e+03 6.637249145507810226e+02 7.272338867187500000e-01 0.000000000000000000e+00 0.000000000000000000e+00 1.368602539062500000e+03 8.702622652053829677e-01 3.000000000000000000e+00 7.473545532226560226e+02 -1.302500000000000000e+02 5.525000000000000000e+01
2.700000000000000000e+01 1.368492307692310078e+03 6.163704223632810226e+02 -1.136779785156250000e+00 0.000000000000000000e+00 0.000000000000000000e+00 1.070240722656250000e+03 1.733820080757140003e+00 3.000000000000000000e+00 1.124380004882809999e+03 -1.292500000000000000e+02 5.525000000000000000e+01
4.700000000000000000e+01 1.025538461538460069e+03 5.741204833984379547e+02 -1.712432861328119893e+00 0.000000000000000000e+00 2.352941185235979948e-01 1.038591918945309999e+03 1.433914780616760032e+00 4.000000000000000000e+00 1.161499389648440001e+03 -1.287500000000000000e+02 5.525000000000000000e+01
5.800000000000000000e+01 7.901923076923079634e+02 4.959718322753910229e+02 -2.288055419921879885e+00 0.000000000000000000e+00 4.117647111415860262e-01 1.006943054199220001e+03 1.813161134719849965e+00 4.000000000000000000e+00 1.055492187500000000e+03 -1.282500000000000000e+02 5.525000000000000000e+01
6.600000000000000000e+01 6.077230769230769738e+02 3.708496704101560226e+02 -2.863708496093750000e+00 0.000000000000000000e+00 2.941176593303679865e-01 9.752941894531250000e+02 1.802787065505979891e+00 4.000000000000000000e+00 4.755865478515619884e+02 -1.277500000000000000e+02 5.525000000000000000e+01
5.300000000000000000e+01 5.357000000000000455e+02 2.815041809082030113e+02 -3.195068359375000000e+00 9.999999776482580358e-03 0.000000000000000000e+00 9.813533935546879547e+02 1.605715990066530097e+00 4.000000000000000000e+00 1.064070678710940001e+03 -1.272500000000000000e+02 5.525000000000000000e+01
4.900000000000000000e+01 4.911769230769230035e+02 2.627610473632810226e+02 -3.282196044921879885e+00 1.218200922012329934e-01 2.857142857142859829e-02 1.025120605468750000e+03 8.929679989814760521e-01 4.000000000000000000e+00 1.226562744140619998e+03 -1.267500000000000000e+02 5.525000000000000000e+01
6.200000000000000000e+01 4.924615384615390212e+02 2.589441528320310226e+02 -3.369293212890620115e+00 0.000000000000000000e+00 2.857142857142859829e-02 1.068887939453119998e+03 1.624248147010799892e+00 4.000000000000000000e+00 1.016253295898440001e+03 -1.262500000000000000e+02 5.525000000000000000e+01
5.200000000000000000e+01 5.069384615384619792e+02 2.866053466796880116e+02 -3.327758789062500000e+00 0.000000000000000000e+00 5.714285714285709944e-02 1.157739746093750000e+03 1.090529918670650078e+00 4.000000000000000000e+00 8.985104980468750000e+02 -1.252500000000000000e+02 5.525000000000000000e+01
6.700000000000000000e+01 5.473538461538460069e+02 3.314261779785160229e+02 -3.127166748046879885e+00 1.279969662427900001e-01 0.000000000000000000e+00 1.203263427734380002e+03 1.674872040748599966e+00 4.000000000000000000e+00 1.105241455078119998e+03 -1.247500000000000000e+02 5.525000000000000000e+01
4.500000000000000000e+01 6.095615384615380208e+02 3.667095642089839771e+02 -2.926605224609379885e+00 9.999999776482580358e-03 8.571428571428570120e-02 1.248787109375000000e+03 1.699831366538999911e+00 4.000000000000000000e+00 1.017873413085940001e+03 -1.242500000000000000e+02 5.525000000000000000e+01
5.700000000000000000e+01 6.487230769230769738e+02 3.834287414550780113e+02 -2.726043701171879885e+00 9.999999776482580358e-03 2.857142857142859829e-02 1.294310791015619998e+03 1.764489769935609909e+00 4.000000000000000000e+00 1.088076782226559999e+03 -1.237500000000000000e+02 5.525000000000000000e+01
5.200000000000000000e+01 8.397615384615389758e+02 3.897188415527339771e+02 -2.066070556640620115e+00 9.999999776482580358e-03 3.529411852359770063e-01 1.409979980468750000e+03 1.001330494880680044e+00 4.000000000000000000e+00 1.304196533203119998e+03 -1.227500000000000000e+02 5.525000000000000000e+01
5.200000000000000000e+01 8.244384615384619792e+02 3.780263977050780113e+02 -1.736083984375000000e+00 9.999999776482580358e-03 5.882353186607359730e-01 1.467814575195309999e+03 6.722534298896789551e-01 4.000000000000000000e+00 1.393608276367190001e+03 -1.222500000000000000e+02 5.525000000000000000e+01
6.300000000000000000e+01 7.775615384615380208e+02 3.507598876953119884e+02 -1.437469482421880107e+00 9.999999776482580358e-03 2.941176593303679865e-01 1.524376342773440001e+03 1.691436529159549895e+00 4.000000000000000000e+00 1.240244018554690001e+03 -1.217500000000000000e+02 5.525000000000000000e+01
4.900000000000000000e+01 7.103846153846160405e+02 3.032727355957030113e+02 -1.232879638671880107e+00 0.000000000000000000e+00 5.714285714285709944e-02 1.577119140625000000e+03 1.703302383422850008e+00 4.000000000000000000e+00 1.118631591796880002e+03 -1.212500000000000000e+02 5.525000000000000000e+01
6.000000000000000000e+01 6.349461538461539476e+02 2.475928955078119884e+02 -1.028320312500000000e+00 0.000000000000000000e+00 5.882353186607359730e-01 1.629862060546880002e+03 1.823578834533690074e+00 4.000000000000000000e+00 1.070211059570309999e+03 -1.207500000000000000e+02 5.525000000000000000e+01
5.300000000000000000e+01 5.701230769230769511e+02 2.130297393798830115e+02 -8.237609863281250000e-01 0.000000000000000000e+00 0.000000000000000000e+00 1.682604980468750000e+03 1.291976451873779963e+00 4.000000000000000000e+00 8.943986816406250000e+02 -1.202500000000000000e+02 5.525000000000000000e+01
5.000000000000000000e+00 4.711923076923069971e+02 1.973425598144530113e+02 -6.351318359375000000e-01 0.000000000000000000e+00 0.000000000000000000e+00 1.756158203125000000e+03 3.108565092086790216e+00 1.000000000000000000e+00 7.949562377929689774e+02 -1.192500000000000000e+02 5.525000000000000000e+01
4.000000000000000000e+00 4.682153846153850054e+02 2.052200469970699999e+02 -5.199890136718750000e-01 0.000000000000000000e+00 5.714285714285709944e-02 1.819067138671880002e+03 3.194482564926150125e+00 1.000000000000000000e+00 5.788791503906250000e+02 -1.182500000000000000e+02 5.525000000000000000e+01
6.600000000000000000e+01 4.770769230769229807e+02 2.031561126708980112e+02 -4.698486328125000000e-01 0.000000000000000000e+00 2.941176593303679865e-01 1.856776611328119998e+03 2.154892444610600144e+00 4.000000000000000000e+00 7.625324707031250000e+02 -1.177500000000000000e+02 5.525000000000000000e+01
5.200000000000000000e+01 4.799230769230770193e+02 1.849071197509769888e+02 -3.745117187500000000e-01 0.000000000000000000e+00 1.352941155433649900e+00 1.936365600585940001e+03 2.296821832656859907e+00 4.000000000000000000e+00 7.372947998046879547e+02 -1.167500000000000000e+02 5.525000000000000000e+01
5.500000000000000000e+01 4.912461538461540158e+02 1.780037536621090055e+02 -3.268432617187500000e-01 0.000000000000000000e+00 8.571428571428570120e-02 1.976160156250000000e+03 8.125353455543520287e-01 4.000000000000000000e+00 6.284493408203120453e+02 -1.162500000000000000e+02 5.525000000000000000e+01
5.800000000000000000e+01 4.936999999999999886e+02 1.888488769531250000e+02 -2.098999023437500000e-01 0.000000000000000000e+00 1.142857142857140046e-01 2.135877685546880002e+03 1.411529064178469905e+00 4.000000000000000000e+00 5.883192138671879547e+02 -1.142500000000000000e+02 5.525000000000000000e+01
6.900000000000000000e+01 4.827538461538459842e+02 1.759010925292969887e+02 -2.407836914062500000e-01 0.000000000000000000e+00 0.000000000000000000e+00 2.164292724609380002e+03 8.135281205177310460e-01 4.000000000000000000e+00 6.374118041992189774e+02 -1.137500000000000000e+02 5.525000000000000000e+01
5.500000000000000000e+01 4.693692307692310237e+02 1.203836593627929972e+02 -3.025817871093750000e-01 0.000000000000000000e+00 0.000000000000000000e+00 2.221122558593750000e+03 1.981561303138730024e+00 4.000000000000000000e+00 5.901035156250000000e+02 -1.127500000000000000e+02 5.525000000000000000e+01
3.300000000000000000e+01 4.720384615384620020e+02 1.086059188842770027e+02 -3.761901855468750000e-01 0.000000000000000000e+00 5.882353186607359730e-01 2.237322998046880002e+03 1.673436641693119897e+00 3.000000000000000000e+00 5.964743652343750000e+02 -1.122500000000000000e+02 5.525000000000000000e+01
5.800000000000000000e+01 4.719846153846149832e+02 1.118804321289059942e+02 -4.924621582031250000e-01 0.000000000000000000e+00 6.470588445663449928e-01 2.241309082031250000e+03 1.679255485534669967e+00 4.000000000000000000e+00 6.267786865234379547e+02 -1.117500000000000000e+02 5.525000000000000000e+01
5.900000000000000000e+01 4.694769230769230148e+02 1.274583129882809942e+02 -6.087341308593750000e-01 0.000000000000000000e+00 5.882353186607359730e-01 2.245295166015619998e+03 1.951756000518799938e+00 4.000000000000000000e+00 6.760175170898439774e+02 -1.112500000000000000e+02 5.525000000000000000e+01
6.700000000000000000e+01 4.589230769230770193e+02 1.485224914550780113e+02 -7.250366210937500000e-01 0.000000000000000000e+00 5.882353186607359730e-01 2.249281250000000000e+03 1.954084753990170009e+00 4.000000000000000000e+00 7.091195068359379547e+02 -1.107500000000000000e+02 5.525000000000000000e+01
7.100000000000000000e+01 4.553230769230769965e+02 1.651298980712890057e+02 -9.471130371093750000e-01 9.999999776482580358e-03 2.000000000000000111e-01 2.235330078125000000e+03 1.955041527748109909e+00 4.000000000000000000e+00 7.258421020507810226e+02 -1.102500000000000000e+02 5.525000000000000000e+01
4.900000000000000000e+01 4.477461538461540158e+02 1.742546691894530113e+02 -1.204467773437500000e+00 0.000000000000000000e+00 2.285714285714290084e-01 2.215400146484380002e+03 1.953546762466429998e+00 4.000000000000000000e+00 6.474076538085939774e+02 -1.097500000000000000e+02 5.525000000000000000e+01
4.800000000000000000e+01 4.450923076923079975e+02 2.093389282226559942e+02 -2.248840332031250000e+00 0.000000000000000000e+00 5.882353186607359730e-01 2.127578857421880002e+03 1.993981719017029919e+00 4.000000000000000000e+00 4.304682922363280113e+02 -1.077500000000000000e+02 5.525000000000000000e+01
6.400000000000000000e+01 4.571000000000000227e+02 2.316147308349609943e+02 -2.513641357421879885e+00 9.999999776482580358e-03 2.000000000000000111e-01 2.103598144531250000e+03 1.987188220024109997e+00 4.000000000000000000e+00 4.843126525878910229e+02 -1.072500000000000000e+02 5.525000000000000000e+01
4.700000000000000000e+01 4.738153846153840050e+02 2.596067810058589771e+02 -2.738769531250000000e+00 0.000000000000000000e+00 2.000000000000000111e-01 2.082349121093750000e+03 1.984728455543520065e+00 4.000000000000000000e+00 4.100813598632810226e+02 -1.067500000000000000e+02 5.525000000000000000e+01
6.600000000000000000e+01 4.871076923076919911e+02 2.745435791015619884e+02 -2.844818115234379885e+00 9.999999776482580358e-03 1.714285714285710138e-01 2.069294677734380002e+03 1.979886054992680000e+00 4.000000000000000000e+00 4.036624145507810226e+02 -1.062500000000000000e+02 5.525000000000000000e+01
6.600000000000000000e+01 5.081384615384610015e+02 2.749465942382810226e+02 -2.950866699218750000e+00 9.999999776482580358e-03 1.428571428571429880e-01 2.056240234375000000e+03 1.964217901229859953e+00 4.000000000000000000e+00 3.815077514648439774e+02 -1.057500000000000000e+02 5.525000000000000000e+01
4.700000000000000000e+01 5.087538461538459842e+02 2.831739501953119884e+02 -3.110565185546879885e+00 9.999999776482580358e-03 5.882353186607359730e-01 2.036458251953119998e+03 1.919501900672909933e+00 4.000000000000000000e+00 3.772655944824219887e+02 -1.042500000000000000e+02 5.525000000000000000e+01
6.400000000000000000e+01 5.189076923076929688e+02 2.938472290039060226e+02 -3.110992431640620115e+00 9.999999776482580358e-03 5.882353186607359730e-01 2.036324829101559999e+03 1.913035392761230025e+00 4.000000000000000000e+00 3.636080932617189774e+02 -1.037500000000000000e+02 5.525000000000000000e+01
6.300000000000000000e+01 5.306538461538459615e+02 3.029549560546880116e+02 -3.111450195312500000e+00 9.999999776482580358e-03 8.235294222831730515e-01 2.036191284179690001e+03 1.914706110954280005e+00 4.000000000000000000e+00 3.354284667968750000e+02 -1.032500000000000000e+02 5.525000000000000000e+01
3.900000000000000000e+01 5.263923076923069857e+02 3.073725891113280113e+02 -3.114105224609379885e+00 9.999999776482580358e-03 8.235294222831730515e-01 2.036430053710940001e+03 1.942630767822270066e+00 3.000000000000000000e+00 3.524410400390619884e+02 -1.027500000000000000e+02 5.525000000000000000e+01
5.000000000000000000e+01 5.226307692307690331e+02 2.947501831054689774e+02 -3.117523193359379885e+00 9.999999776482580358e-03 7.647058963775630325e-01 2.036792846679690001e+03 1.964132905006410024e+00 4.000000000000000000e+00 3.414334106445310226e+02 -1.022500000000000000e+02 5.525000000000000000e+01
5.800000000000000000e+01 5.156000000000000227e+02 2.774683532714839771e+02 -3.120941162109379885e+00 9.999999776482580358e-03 1.428571428571429880e-01 2.037155517578119998e+03 1.963272690773010032e+00 4.000000000000000000e+00 3.071369018554689774e+02 -1.017500000000000000e+02 5.525000000000000000e+01
5.300000000000000000e+01 5.018692307692310237e+02 2.542164306640619884e+02 -3.219329833984379885e+00 1.166272312402729938e-01 1.714285714285710138e-01 2.031773559570309999e+03 1.938583850860599922e+00 4.000000000000000000e+00 3.042572326660160229e+02 -1.007500000000000000e+02 5.525000000000000000e+01
4.400000000000000000e+01 5.029384615384619792e+02 2.537301483154300001e+02 -3.314331054687500000e+00 1.257144212722779986e-01 2.941176593303679865e-01 2.026028686523440001e+03 1.928267598152159978e+00 3.000000000000000000e+00 2.990628356933589771e+02 -1.002500000000000000e+02 5.525000000000000000e+01
5.200000000000000000e+01 1.873192307692309896e+03 6.944776000976560226e+02 9.845886230468750000e-01 0.000000000000000000e+00 2.352941185235979948e-01 1.334320434570309999e+03 1.962125539779659977e+00 4.000000000000000000e+00 6.063619995117189774e+02 -1.312500000000000000e+02 5.575000000000000000e+01
5.200000000000000000e+01 1.584361538461540022e+03 6.516508789062500000e+02 -6.627807617187500000e-01 9.999999776482580358e-03 0.000000000000000000e+00 1.153770751953119998e+03 1.415210604667660022e+00 4.000000000000000000e+00 7.843933715820310226e+02 -1.302500000000000000e+02 5.575000000000000000e+01
1.000000000000000000e+00 1.304723076923080043e+03 5.416193237304689774e+02 -1.486480712890619893e+00 1.070025414228440025e-01 2.857142857142859829e-02 1.063495971679690001e+03 1.684378862380979891e+00 1.000000000000000000e+00 1.310187622070309999e+03 -1.297500000000000000e+02 5.575000000000000000e+01
5.900000000000000000e+01 1.131700000000000045e+03 4.907766723632810226e+02 -2.258605957031250000e+00 0.000000000000000000e+00 0.000000000000000000e+00 9.861403198242189774e+02 1.158795237541200063e+00 4.000000000000000000e+00 5.680922241210939774e+02 -1.292500000000000000e+02 5.575000000000000000e+01
6.600000000000000000e+01 8.718999999999999773e+02 4.823632507324219887e+02 -2.876007080078120115e+00 0.000000000000000000e+00 1.176470592617989974e-01 9.475421752929689774e+02 1.867453455924990013e+00 4.000000000000000000e+00 4.701996765136719887e+02 -1.287500000000000000e+02 5.575000000000000000e+01
5.900000000000000000e+01 6.826153846153849827e+02 4.211060791015619884e+02 -3.493408203125000000e+00 1.282122582197189886e-01 0.000000000000000000e+00 9.089440307617189774e+02 1.243254184722899947e+00 4.000000000000000000e+00 1.155299560546880002e+03 -1.282500000000000000e+02 5.575000000000000000e+01
4.600000000000000000e+01 5.002692307692310010e+02 2.809044494628910229e+02 -4.423675537109380329e+00 0.000000000000000000e+00 0.000000000000000000e+00 8.766804199218750000e+02 6.632590293884279564e-01 4.000000000000000000e+00 9.441705932617189774e+02 -1.272500000000000000e+02 5.575000000000000000e+01
6.900000000000000000e+01 4.750307692307690104e+02 2.726172790527339771e+02 -4.432037353515619671e+00 2.399034351110460039e-01 2.941176593303679865e-01 9.279477539062500000e+02 6.710642576217650257e-01 4.000000000000000000e+00 1.421639526367190001e+03 -1.267500000000000000e+02 5.575000000000000000e+01
7.000000000000000000e+01 4.815230769230769852e+02 2.706379089355469887e+02 -4.440399169921880329e+00 0.000000000000000000e+00 5.882352963089940157e-02 9.792150878906250000e+02 1.376536726951600009e+00 4.000000000000000000e+00 8.195792846679689774e+02 -1.262500000000000000e+02 5.575000000000000000e+01
5.300000000000000000e+01 4.946846153846159950e+02 2.815416564941410229e+02 -4.448730468750000000e+00 9.999999776482580358e-03 2.857142857142859829e-02 1.030482421875000000e+03 1.343615412712100055e+00 4.000000000000000000e+00 1.087623413085940001e+03 -1.257500000000000000e+02 5.575000000000000000e+01
5.300000000000000000e+01 5.034538461538459728e+02 3.161266784667969887e+02 -4.217132568359380329e+00 9.999999776482580358e-03 0.000000000000000000e+00 1.084314086914059999e+03 1.599257111549380106e+00 4.000000000000000000e+00 1.202893798828119998e+03 -1.252500000000000000e+02 5.575000000000000000e+01
6.800000000000000000e+01 5.338230769230769965e+02 3.597017822265619884e+02 -3.905548095703120115e+00 9.999999776482580358e-03 5.714285714285709944e-02 1.139000610351559999e+03 1.616849541664119982e+00 4.000000000000000000e+00 1.161566894531250000e+03 -1.247500000000000000e+02 5.575000000000000000e+01
5.500000000000000000e+01 5.813692307692309669e+02 3.850290222167969887e+02 -3.593933105468750000e+00 2.837253808975219727e-01 0.000000000000000000e+00 1.193687133789059999e+03 1.682808995246890094e+00 4.000000000000000000e+00 1.394313476562500000e+03 -1.242500000000000000e+02 5.575000000000000000e+01
5.900000000000000000e+01 6.969769230769229580e+02 3.893056640625000000e+02 -2.815612792968750000e+00 9.999999776482580358e-03 0.000000000000000000e+00 1.334269897460940001e+03 8.650952577590940162e-01 4.000000000000000000e+00 1.304660522460940001e+03 -1.232500000000000000e+02 5.575000000000000000e+01
6.100000000000000000e+01 7.575230769230760188e+02 3.789087219238280113e+02 -2.348846435546879885e+00 1.748490929603579991e-01 5.714285714285709944e-02 1.420166015625000000e+03 1.690911531448360039e+00 4.000000000000000000e+00 1.393445068359380002e+03 -1.227500000000000000e+02 5.575000000000000000e+01
4.800000000000000000e+01 7.385076923076919684e+02 3.553765563964839771e+02 -1.882110595703119893e+00 0.000000000000000000e+00 8.571428571428570120e-02 1.506062133789059999e+03 1.716059803962709962e+00 4.000000000000000000e+00 1.023728820800779999e+03 -1.222500000000000000e+02 5.575000000000000000e+01
5.300000000000000000e+01 6.680153846153849599e+02 3.147431030273439774e+02 -1.471679687500000000e+00 9.999999776482580358e-03 1.428571428571429880e-01 1.585625366210940001e+03 1.603282928466799984e+00 4.000000000000000000e+00 1.073728759765619998e+03 -1.217500000000000000e+02 5.575000000000000000e+01
4.300000000000000000e+01 6.074615384615390212e+02 2.694685363769530113e+02 -1.230163574218750000e+00 0.000000000000000000e+00 1.142857142857140046e-01 1.646189697265619998e+03 7.840787768363950416e-01 3.000000000000000000e+00 6.991298828125000000e+02 -1.212500000000000000e+02 5.575000000000000000e+01
1.200000000000000000e+01 5.594846153846150401e+02 2.346657562255859943e+02 -9.886474609375000000e-01 0.000000000000000000e+00 1.142857142857140046e-01 1.706753906250000000e+03 7.853217124938960403e-01 1.000000000000000000e+00 7.492836303710939774e+02 -1.207500000000000000e+02 5.575000000000000000e+01
4.200000000000000000e+01 4.785461538461540272e+02 2.090641326904300001e+02 -5.936279296875000000e-01 0.000000000000000000e+00 0.000000000000000000e+00 1.816127441406250000e+03 9.049174785614010341e-01 3.000000000000000000e+00 8.006083374023439774e+02 -1.197500000000000000e+02 5.575000000000000000e+01
3.000000000000000000e+00 4.280846153846150060e+02 1.956979980468750000e+02 -3.657836914062500000e-01 0.000000000000000000e+00 0.000000000000000000e+00 1.961843139648440001e+03 3.235586404800419924e+00 1.000000000000000000e+00 5.665374145507810226e+02 -1.177500000000000000e+02 5.575000000000000000e+01
2.700000000000000000e+01 4.650692307692310123e+02 1.902883300781250000e+02 -3.058471679687500000e-01 0.000000000000000000e+00 2.000000000000000111e-01 2.062999267578119998e+03 9.170060753822329991e-01 3.000000000000000000e+00 6.919331665039060226e+02 -1.162500000000000000e+02 5.575000000000000000e+01
5.300000000000000000e+01 4.721692307692309782e+02 1.917438354492190058e+02 -3.238220214843750000e-01 0.000000000000000000e+00 2.000000000000000111e-01 2.090767822265619998e+03 8.002542257308959961e-01 4.000000000000000000e+00 7.038837890625000000e+02 -1.157500000000000000e+02 5.575000000000000000e+01
5.100000000000000000e+01 4.751000000000000227e+02 1.987043304443359943e+02 -3.597717285156250000e-01 0.000000000000000000e+00 1.714285714285710138e-01 2.146304687500000000e+03 1.918541550636289950e+00 4.000000000000000000e+00 6.649830322265620453e+02 -1.147500000000000000e+02 5.575000000000000000e+01
6.200000000000000000e+01 4.739076923076920025e+02 1.979784698486330115e+02 -3.917846679687500000e-01 0.000000000000000000e+00 8.571428571428570120e-02 2.171025634765619998e+03 1.623324751853939985e+00 4.000000000000000000e+00 6.477846679687500000e+02 -1.142500000000000000e+02 5.575000000000000000e+01
5.900000000000000000e+01 4.596538461538460183e+02 1.910309753417969887e+02 -4.659118652343750000e-01 0.000000000000000000e+00 5.714285714285709944e-02 2.186603515625000000e+03 1.120890259742739925e+00 4.000000000000000000e+00 5.956694335937500000e+02 -1.137500000000000000e+02 5.575000000000000000e+01
4.500000000000000000e+01 4.521384615384610015e+02 1.493661804199219887e+02 -6.141662597656250000e-01 0.000000000000000000e+00 1.714285714285710138e-01 2.217759277343750000e+03 1.972040653228759988e+00 4.000000000000000000e+00 5.500814819335939774e+02 -1.127500000000000000e+02 5.575000000000000000e+01
3.000000000000000000e+01 4.712846153846149946e+02 1.384177398681640057e+02 -7.288513183593750000e-01 0.000000000000000000e+00 5.882353186607359730e-01 2.222431640625000000e+03 1.951929330825810105e+00 3.000000000000000000e+00 6.437603149414060226e+02 -1.122500000000000000e+02 5.575000000000000000e+01
3.500000000000000000e+01 4.738999999999999773e+02 1.431400756835940058e+02 -8.841247558593750000e-01 0.000000000000000000e+00 5.882353186607359730e-01 2.216198730468750000e+03 1.931456565856930041e+00 3.000000000000000000e+00 6.723495483398439774e+02 -1.117500000000000000e+02 5.575000000000000000e+01
3.800000000000000000e+01 4.728461538461539817e+02 1.545745544433590055e+02 -1.039398193359380107e+00 0.000000000000000000e+00 1.117647051811220038e+00 2.209965820312500000e+03 1.936434030532840023e+00 3.000000000000000000e+00 5.865428466796879547e+02 -1.112500000000000000e+02 5.575000000000000000e+01
6.100000000000000000e+01 4.648692307692310237e+02 1.647053222656250000e+02 -1.194641113281250000e+00 9.999999776482580358e-03 8.571428571428570120e-02 2.203732910156250000e+03 1.906811833381649945e+00 4.000000000000000000e+00 5.663460083007810226e+02 -1.107500000000000000e+02 5.575000000000000000e+01
3.700000000000000000e+01 4.561999999999999886e+02 1.718654022216800001e+02 -1.435607910156250000e+00 9.999999776482580358e-03 5.882352963089940157e-02 2.183478515625000000e+03 1.941902518272399902e+00 3.000000000000000000e+00 5.766615600585939774e+02 -1.102500000000000000e+02 5.575000000000000000e+01
5.200000000000000000e+01 4.436846153846159950e+02 1.789705657958980112e+02 -1.705169677734380107e+00 9.999999776482580358e-03 2.941176593303679865e-01 2.158550292968750000e+03 1.947522401809689940e+00 4.000000000000000000e+00 5.600016479492189774e+02 -1.097500000000000000e+02 5.575000000000000000e+01
7.000000000000000000e+01 4.395384615384620020e+02 1.848667602539059942e+02 -1.974700927734380107e+00 0.000000000000000000e+00 5.882353186607359730e-01 2.133622070312500000e+03 1.963251471519469993e+00 4.000000000000000000e+00 4.911304016113280113e+02 -1.092500000000000000e+02 5.575000000000000000e+01
4.200000000000000000e+01 4.567461538461540158e+02 2.208383636474609943e+02 -2.990264892578120115e+00 9.999999776482580358e-03 7.058823704719540126e-01 2.037038330078119998e+03 1.969186544418330076e+00 3.000000000000000000e+00 4.350022583007810226e+02 -1.072500000000000000e+02 5.575000000000000000e+01
3.600000000000000000e+01 4.859615384615390212e+02 2.591706542968750000e+02 -3.291870117187500000e+00 9.999999776482580358e-03 5.882353186607359730e-01 2.001903442382809999e+03 1.954840183258059971e+00 3.000000000000000000e+00 4.112647399902339771e+02 -1.062500000000000000e+02 5.575000000000000000e+01
3.800000000000000000e+01 5.063076923076930029e+02 2.806222229003910229e+02 -3.476043701171879885e+00 9.999999776482580358e-03 7.058823704719540126e-01 1.974349609375000000e+03 1.923513293266299939e+00 3.000000000000000000e+00 4.141065063476560226e+02 -1.052500000000000000e+02 5.575000000000000000e+01
5.000000000000000000e+01 5.371461538461539931e+02 3.412410888671880116e+02 -3.584533691406250000e+00 1.216242164373400048e-01 9.411764740943909802e-01 1.957227783203119998e+03 1.329826116561890093e+00 4.000000000000000000e+00 3.613116760253910229e+02 -1.032500000000000000e+02 5.575000000000000000e+01
3.400000000000000000e+01 5.302076923076920139e+02 3.490595703125000000e+02 -3.617034912109379885e+00 1.405582875013350053e-01 9.411764740943909802e-01 1.954170410156250000e+03 1.842233300209050073e+00 3.000000000000000000e+00 3.585588989257810226e+02 -1.027500000000000000e+02 5.575000000000000000e+01
6.100000000000000000e+01 5.110153846153850168e+02 2.719264831542969887e+02 -3.971954345703120115e+00 1.941346526145940055e-01 8.571428571428570120e-02 1.928379760742190001e+03 1.776653647422790083e+00 4.000000000000000000e+00 3.014713745117189774e+02 -1.002500000000000000e+02 5.575000000000000000e+01
1.500000000000000000e+01 9.242923076923079861e+02 4.946827392578119884e+02 3.943328857421879885e+00 0.000000000000000000e+00 0.000000000000000000e+00 1.795200439453119998e+03 1.416346192359920098e+00 1.000000000000000000e+00 2.171063079833980112e+02 -1.597500000000000000e+02 5.625000000000000000e+01
4.800000000000000000e+01 1.628769230769230035e+03 6.757579345703120453e+02 4.376525878906250000e-01 0.000000000000000000e+00 0.000000000000000000e+00 1.226845825195309999e+03 1.565192341804499954e+00 4.000000000000000000e+00 5.536671142578120453e+02 -1.317500000000000000e+02 5.625000000000000000e+01
2.000000000000000000e+00 1.530523076923079998e+03 6.826459350585939774e+02 -6.225280761718750000e-01 0.000000000000000000e+00 0.000000000000000000e+00 1.007167724609380002e+03 1.453751087188720037e+00 1.000000000000000000e+00 4.228916320800780113e+02 -1.312500000000000000e+02 5.625000000000000000e+01
6.000000000000000000e+00 1.460584615384620065e+03 6.645827026367189774e+02 -1.306060791015619893e+00 0.000000000000000000e+00 0.000000000000000000e+00 9.833000488281250000e+02 1.457544326782229893e+00 1.000000000000000000e+00 1.199072021484380002e+03 -1.307500000000000000e+02 5.625000000000000000e+01
1.000000000000000000e+00 1.053876923076920093e+03 4.847567443847660229e+02 -2.673156738281250000e+00 9.999999776482580358e-03 2.352941185235979948e-01 9.355646972656250000e+02 1.541606307029719902e+00 1.000000000000000000e+00 1.228428588867190001e+03 -1.297500000000000000e+02 5.625000000000000000e+01
6.300000000000000000e+01 9.292923076923069630e+02 4.666922912597660229e+02 -3.346435546875000000e+00 1.285505145788189973e-01 0.000000000000000000e+00 9.065957641601560226e+02 8.662846088409420497e-01 4.000000000000000000e+00 1.073122192382809999e+03 -1.292500000000000000e+02 5.625000000000000000e+01
7.200000000000000000e+01 7.360615384615390440e+02 4.622426452636719887e+02 -3.988861083984379885e+00 0.000000000000000000e+00 0.000000000000000000e+00 8.623231811523439774e+02 1.313030362129210094e+00 4.000000000000000000e+00 4.311364440917969887e+02 -1.287500000000000000e+02 5.625000000000000000e+01
2.800000000000000000e+01 6.070153846153849599e+02 4.180007324218750000e+02 -4.631286621093750000e+00 1.123633012175559998e-01 2.857142857142859829e-02 8.180505981445310226e+02 8.845276236534119763e-01 3.000000000000000000e+00 1.260416625976559999e+03 -1.282500000000000000e+02 5.625000000000000000e+01
7.400000000000000000e+01 5.201000000000000227e+02 3.051461486816410229e+02 -5.273712158203119671e+00 1.957466602325440008e-01 2.941176593303679865e-01 7.737780151367189774e+02 6.211907863616940029e-01 4.000000000000000000e+00 1.001217224121089998e+03 -1.277500000000000000e+02 5.625000000000000000e+01
5.800000000000000000e+01 4.716153846153849827e+02 2.732203674316410229e+02 -5.562866210937500000e+00 9.999999776482580358e-03 2.352941185235979948e-01 7.800966186523439774e+02 6.957498788833620385e-01 4.000000000000000000e+00 8.784121093750000000e+02 -1.272500000000000000e+02 5.625000000000000000e+01
6.000000000000000000e+01 4.603999999999999773e+02 2.691151733398439774e+02 -5.498748779296880329e+00 3.026425540447240103e-01 0.000000000000000000e+00 8.370064086914060226e+02 5.949391722679140404e-01 4.000000000000000000e+00 1.597721679687500000e+03 -1.267500000000000000e+02 5.625000000000000000e+01
9.000000000000000000e+00 4.724692307692300233e+02 2.759065246582030113e+02 -5.434661865234380329e+00 3.220196068286900193e-01 0.000000000000000000e+00 8.939161987304689774e+02 5.805606842041020066e-01 1.000000000000000000e+00 1.469329956054690001e+03 -1.262500000000000000e+02 5.625000000000000000e+01
5.600000000000000000e+01 4.807307692307689990e+02 2.982235717773439774e+02 -5.370574951171880329e+00 2.957663834095000110e-01 8.571428571428570120e-02 9.508259887695310226e+02 5.909888744354250267e-01 4.000000000000000000e+00 1.556853393554690001e+03 -1.257500000000000000e+02 5.625000000000000000e+01
6.500000000000000000e+01 5.275692307692310123e+02 3.716196289062500000e+02 -4.622314453125000000e+00 3.646432459354400080e-01 0.000000000000000000e+00 1.080257324218750000e+03 9.638992547988890491e-01 4.000000000000000000e+00 1.326982666015619998e+03 -1.247500000000000000e+02 5.625000000000000000e+01
4.600000000000000000e+01 6.137076923076920139e+02 3.843240661621089771e+02 -3.785491943359379885e+00 4.493038058280939828e-01 5.714285714285709944e-02 1.211919067382809999e+03 9.693214297294620030e-01 4.000000000000000000e+00 1.580160400390619998e+03 -1.237500000000000000e+02 5.625000000000000000e+01
6.400000000000000000e+01 6.473692307692309669e+02 3.719645385742189774e+02 -3.202972412109379885e+00 9.999999776482580358e-03 2.941176593303679865e-01 1.321971801757809999e+03 1.645169258117680000e+00 4.000000000000000000e+00 1.357384277343750000e+03 -1.232500000000000000e+02 5.625000000000000000e+01
3.700000000000000000e+01 6.576769230769230035e+02 3.429832763671880116e+02 -2.620422363281250000e+00 1.841678470373150078e-01 1.142857142857140046e-01 1.432024658203119998e+03 1.743175864219669968e+00 3.000000000000000000e+00 1.380773071289059999e+03 -1.227500000000000000e+02 5.625000000000000000e+01
5.800000000000000000e+01 6.054307692307689877e+02 3.102781982421880116e+02 -2.037902832031250000e+00 0.000000000000000000e+00 8.571428571428570120e-02 1.542077514648440001e+03 9.384162425994869716e-01 4.000000000000000000e+00 9.523388671875000000e+02 -1.222500000000000000e+02 5.625000000000000000e+01
1.600000000000000000e+01 5.617461538461540158e+02 2.762414245605469887e+02 -1.532958984375000000e+00 0.000000000000000000e+00 2.941176593303679865e-01 1.641501586914059999e+03 8.064342737197880417e-01 1.000000000000000000e+00 7.103150024414060226e+02 -1.217500000000000000e+02 5.625000000000000000e+01
6.000000000000000000e+00 5.266923076923079634e+02 2.446412963867190058e+02 -1.260711669921880107e+00 0.000000000000000000e+00 5.882353186607359730e-01 1.709039428710940001e+03 8.166127204895019531e-01 1.000000000000000000e+00 5.691122436523439774e+02 -1.212500000000000000e+02 5.625000000000000000e+01
1.700000000000000000e+01 4.732461538461540158e+02 2.278878784179690058e+02 -7.162170410156250000e-01 0.000000000000000000e+00 0.000000000000000000e+00 1.844115234375000000e+03 1.925385475158690074e+00 1.000000000000000000e+00 6.656524047851560226e+02 -1.202500000000000000e+02 5.625000000000000000e+01
1.100000000000000000e+01 4.550076923076920252e+02 2.236905517578119884e+02 -5.451965332031250000e-01 0.000000000000000000e+00 0.000000000000000000e+00 1.898786743164059999e+03 2.874851942062380150e+00 1.000000000000000000e+00 6.354346313476560226e+02 -1.197500000000000000e+02 5.625000000000000000e+01
4.500000000000000000e+01 4.312846153846149946e+02 2.157094573974609943e+02 -4.754333496093750000e-01 0.000000000000000000e+00 2.857142857142859829e-02 1.940591796875000000e+03 8.581609129905699573e-01 4.000000000000000000e+00 5.510855712890620453e+02 -1.192500000000000000e+02 5.625000000000000000e+01
1.300000000000000000e+01 4.342846153846149946e+02 1.965999450683590055e+02 -3.359069824218750000e-01 0.000000000000000000e+00 2.857142857142859829e-02 2.024202026367190001e+03 2.701653718948359817e+00 1.000000000000000000e+00 6.835186767578120453e+02 -1.182500000000000000e+02 5.625000000000000000e+01
4.000000000000000000e+00 3.978538461538460069e+02 1.938174743652340055e+02 -3.313598632812500000e-01 0.000000000000000000e+00 5.714285714285709944e-02 2.083196777343750000e+03 2.127146959304810014e+00 1.000000000000000000e+00 4.708505249023439774e+02 -1.172500000000000000e+02 5.625000000000000000e+01
5.500000000000000000e+01 4.243076923076919797e+02 1.968127441406250000e+02 -3.387451171875000000e-01 0.000000000000000000e+00 2.857142857142859829e-02 2.110936035156250000e+03 1.328977704048160069e+00 4.000000000000000000e+00 6.581077270507810226e+02 -1.167500000000000000e+02 5.625000000000000000e+01
5.900000000000000000e+01 4.420923076923079975e+02 2.037322387695309942e+02 -3.460998535156250000e-01 0.000000000000000000e+00 8.571428571428570120e-02 2.138675292968750000e+03 9.986728429794310413e-01 4.000000000000000000e+00 7.007833862304689774e+02 -1.162500000000000000e+02 5.625000000000000000e+01
6.400000000000000000e+01 4.442384615384610242e+02 2.083162384033199999e+02 -4.096984863281250000e-01 0.000000000000000000e+00 2.352941185235979948e-01 2.154452392578119998e+03 7.980281114578250401e-01 4.000000000000000000e+00 6.146011352539060226e+02 -1.157500000000000000e+02 5.625000000000000000e+01
6.200000000000000000e+01 4.417615384615380094e+02 2.122254180908199999e+02 -4.733276367187500000e-01 0.000000000000000000e+00 2.941176593303679865e-01 2.170229736328119998e+03 8.004753589630130284e-01 4.000000000000000000e+00 6.098476562500000000e+02 -1.152500000000000000e+02 5.625000000000000000e+01
5.200000000000000000e+01 4.479461538461540044e+02 2.159047851562500000e+02 -5.369262695312500000e-01 0.000000000000000000e+00 5.714285714285709944e-02 2.186007080078119998e+03 7.991067767143249512e-01 4.000000000000000000e+00 6.339912109375000000e+02 -1.147500000000000000e+02 5.625000000000000000e+01
4.300000000000000000e+01 4.451615384615379867e+02 2.134564361572269888e+02 -6.126708984375000000e-01 0.000000000000000000e+00 1.428571428571429880e-01 2.198740478515619998e+03 8.001121282577510208e-01 3.000000000000000000e+00 6.170856933593750000e+02 -1.142500000000000000e+02 5.625000000000000000e+01
4.600000000000000000e+01 4.345769230769229807e+02 2.097776947021480112e+02 -7.248229980468750000e-01 0.000000000000000000e+00 2.941176593303679865e-01 2.202342041015619998e+03 1.472267508506770017e+00 4.000000000000000000e+00 5.570916137695310226e+02 -1.137500000000000000e+02 5.625000000000000000e+01
5.700000000000000000e+01 4.410846153846150060e+02 2.003219757080080115e+02 -8.370056152343750000e-01 0.000000000000000000e+00 5.882353186607359730e-01 2.205943847656250000e+03 1.969746947288510075e+00 4.000000000000000000e+00 6.170083007812500000e+02 -1.132500000000000000e+02 5.625000000000000000e+01
4.600000000000000000e+01 4.390153846153850168e+02 1.911852569580080115e+02 -9.491577148437500000e-01 0.000000000000000000e+00 1.428571428571429880e-01 2.209545654296880002e+03 1.980857372283939988e+00 4.000000000000000000e+00 5.506851806640620453e+02 -1.127500000000000000e+02 5.625000000000000000e+01
5.700000000000000000e+01 4.539230769230770193e+02 1.883252258300780113e+02 -1.098236083984380107e+00 0.000000000000000000e+00 2.941176593303679865e-01 2.203692871093750000e+03 1.977219223976139917e+00 4.000000000000000000e+00 5.468754272460939774e+02 -1.122500000000000000e+02 5.625000000000000000e+01
2.100000000000000000e+01 4.616615384615379867e+02 1.908936157226559942e+02 -1.284240722656250000e+00 9.999999776482580358e-03 6.470588445663449928e-01 2.188385742187500000e+03 1.948773264884950063e+00 3.000000000000000000e+00 5.867674560546879547e+02 -1.117500000000000000e+02 5.625000000000000000e+01
4.100000000000000000e+01 4.758769230769229921e+02 1.956942291259769888e+02 -1.470245361328119893e+00 9.999999776482580358e-03 5.882353186607359730e-01 2.173078613281250000e+03 1.939073920249940075e+00 3.000000000000000000e+00 7.264136352539060226e+02 -1.112500000000000000e+02 5.625000000000000000e+01
3.100000000000000000e+01 4.410615384615380208e+02 1.984026794433590055e+02 -1.656250000000000000e+00 0.000000000000000000e+00 1.142857142857140046e-01 2.157771484375000000e+03 1.968774318695069914e+00 3.000000000000000000e+00 4.733149108886719887e+02 -1.107500000000000000e+02 5.625000000000000000e+01
6.800000000000000000e+01 4.391692307692309782e+02 1.978996887207030113e+02 -1.909454345703119893e+00 9.999999776482580358e-03 2.285714285714290084e-01 2.131995849609380002e+03 1.983006715774539908e+00 4.000000000000000000e+00 4.748872680664060226e+02 -1.102500000000000000e+02 5.625000000000000000e+01
3.900000000000000000e+01 4.376692307692309782e+02 1.963852691650390057e+02 -2.185028076171879885e+00 9.999999776482580358e-03 3.529411852359770063e-01 2.102730224609380002e+03 1.979809284210209963e+00 3.000000000000000000e+00 4.777133178710939774e+02 -1.097500000000000000e+02 5.625000000000000000e+01
4.100000000000000000e+01 4.331000000000000227e+02 1.987528228759769888e+02 -2.460601806640620115e+00 9.999999776482580358e-03 1.714285714285710138e-01 2.073464843750000000e+03 1.972248196601869896e+00 3.000000000000000000e+00 4.354701538085939774e+02 -1.092500000000000000e+02 5.625000000000000000e+01
6.000000000000000000e+01 4.477307692307689990e+02 2.255916442871090055e+02 -3.201446533203120115e+00 9.999999776482580358e-03 7.058823704719540126e-01 1.996308837890619998e+03 1.944755077362060103e+00 4.000000000000000000e+00 4.293153076171880116e+02 -1.077500000000000000e+02 5.625000000000000000e+01
4.000000000000000000e+01 4.584461538461540044e+02 2.411813507080080115e+02 -3.434051513671879885e+00 9.999999776482580358e-03 3.142857142857140018e-01 1.972363647460940001e+03 1.935027480125429911e+00 3.000000000000000000e+00 4.623393249511719887e+02 -1.072500000000000000e+02 5.625000000000000000e+01
6.400000000000000000e+01 4.735230769230769852e+02 2.558072052001949999e+02 -3.629211425781250000e+00 1.177925318479540046e-01 6.470588445663449928e-01 1.950709838867190001e+03 1.922817111015320046e+00 4.000000000000000000e+00 5.064519958496089771e+02 -1.067500000000000000e+02 5.625000000000000000e+01
4.800000000000000000e+01 4.856692307692309782e+02 2.724990234375000000e+02 -3.712005615234379885e+00 1.182059869170190014e-01 1.714285714285710138e-01 1.935930786132809999e+03 1.903501868247990059e+00 4.000000000000000000e+00 5.236420898437500000e+02 -1.062500000000000000e+02 5.625000000000000000e+01
5.100000000000000000e+01 4.953999999999999773e+02 2.875219421386719887e+02 -3.794799804687500000e+00 1.339482218027109872e-01 6.470588445663449928e-01 1.921151611328119998e+03 1.890968322753910025e+00 4.000000000000000000e+00 5.231257934570310226e+02 -1.057500000000000000e+02 5.625000000000000000e+01
3.300000000000000000e+01 5.007769230769230262e+02 2.996040649414060226e+02 -3.877624511718750000e+00 1.357797533273699953e-01 1.117647051811220038e+00 1.906372558593750000e+03 1.888954997062679997e+00 3.000000000000000000e+00 4.957742309570310226e+02 -1.052500000000000000e+02 5.625000000000000000e+01
5.600000000000000000e+01 5.088692307692310237e+02 3.348550415039060226e+02 -3.975463867187500000e+00 1.478283703327180065e-01 1.411764740943910024e+00 1.890276489257809999e+03 1.862625956535340022e+00 4.000000000000000000e+00 4.548686828613280113e+02 -1.042500000000000000e+02 5.625000000000000000e+01
5.000000000000000000e+01 5.250230769230770420e+02 3.519763793945310226e+02 -4.013122558593750000e+00 1.712491810321810082e-01 5.882353186607359730e-01 1.884472167968750000e+03 1.842049002647399902e+00 4.000000000000000000e+00 4.417486877441410229e+02 -1.037500000000000000e+02 5.625000000000000000e+01
5.600000000000000000e+01 5.257692307692309441e+02 3.451685180664060226e+02 -4.184509277343750000e+00 2.155622839927670009e-01 6.470588445663449928e-01 1.865665405273440001e+03 1.834984779357909934e+00 4.000000000000000000e+00 3.815257873535160229e+02 -1.022500000000000000e+02 5.625000000000000000e+01
3.200000000000000000e+01 5.190153846153849599e+02 3.206734924316410229e+02 -4.255584716796880329e+00 2.336925417184829989e-01 4.117647111415860262e-01 1.859064697265619998e+03 1.840191006660460094e+00 3.000000000000000000e+00 3.517103271484380116e+02 -1.017500000000000000e+02 5.625000000000000000e+01
4.500000000000000000e+01 5.163769230769239584e+02 2.980459899902339771e+02 -4.326629638671880329e+00 2.349690049886699883e-01 1.714285714285710138e-01 1.852463989257809999e+03 1.850793719291689898e+00 4.000000000000000000e+00 3.450686035156250000e+02 -1.012500000000000000e+02 5.625000000000000000e+01
5.600000000000000000e+01 5.271615384615380435e+02 2.845915527343750000e+02 -4.471008300781250000e+00 2.247837185859679898e-01 5.882353186607359730e-01 1.842015502929690001e+03 1.860820174217219902e+00 4.000000000000000000e+00 2.741654968261719887e+02 -1.007500000000000000e+02 5.625000000000000000e+01
6.600000000000000000e+01 5.092538461538459842e+02 2.802103576660160229e+02 -4.615417480468750000e+00 2.572708129882809724e-01 2.941176593303679865e-01 1.831567016601559999e+03 1.804898381233219995e+00 4.000000000000000000e+00 3.026567993164060226e+02 -1.002500000000000000e+02 5.625000000000000000e+01
6.000000000000000000e+00 8.525000000000000000e+02 3.430024719238280113e+02 3.193634033203120115e+00 0.000000000000000000e+00 0.000000000000000000e+00 1.769374389648440001e+03 1.353039503097529961e+00 1.000000000000000000e+00 1.485715637207030113e+02 -1.582500000000000000e+02 5.675000000000000000e+01
1.000000000000000000e+00 1.233176923076920048e+03 6.557543334960939774e+02 -1.495910644531250000e+00 0.000000000000000000e+00 0.000000000000000000e+00 9.627883911132810226e+02 2.182256221771239790e+00 1.000000000000000000e+00 5.954136962890620453e+02 -1.312500000000000000e+02 5.675000000000000000e+01
1.800000000000000000e+01 9.489230769230770193e+02 5.791129760742189774e+02 -2.858978271484379885e+00 1.123006120324129969e-01 2.941176593303679865e-01 9.134097290039060226e+02 1.283091425895690030e+00 1.000000000000000000e+00 1.663383056640619998e+03 -1.302500000000000000e+02 5.675000000000000000e+01
4.300000000000000000e+01 8.273923076923080089e+02 5.097781372070310226e+02 -3.540527343750000000e+00 9.999999776482580358e-03 2.857142857142859829e-02 8.887203369140620453e+02 7.371653318405150257e-01 3.000000000000000000e+00 7.942988891601560226e+02 -1.297500000000000000e+02 5.675000000000000000e+01
1.500000000000000000e+01 7.242000000000000455e+02 4.868051452636719887e+02 -4.188232421875000000e+00 1.153141334652900002e-01 0.000000000000000000e+00 8.600232543945310226e+02 1.248707294464109996e+00 1.000000000000000000e+00 1.394405029296880002e+03 -1.292500000000000000e+02 5.675000000000000000e+01
7.000000000000000000e+01 6.202692307692309441e+02 4.641520996093750000e+02 -4.734527587890619671e+00 1.929735243320470084e-01 0.000000000000000000e+00 8.193029785156250000e+02 6.326155066490170009e-01 4.000000000000000000e+00 1.258566162109380002e+03 -1.287500000000000000e+02 5.675000000000000000e+01
2.900000000000000000e+01 5.354076923076919456e+02 4.155406494140619884e+02 -5.280822753906250000e+00 1.541471183300019976e-01 2.857142857142859829e-02 7.785827026367189774e+02 6.149228215217590332e-01 3.000000000000000000e+00 1.506784545898440001e+03 -1.282500000000000000e+02 5.675000000000000000e+01
5.400000000000000000e+01 4.803615384615389985e+02 3.076107177734380116e+02 -5.827087402343750000e+00 2.567874491214749977e-01 2.857142857142859829e-02 7.378624267578120453e+02 5.969229936599730335e-01 4.000000000000000000e+00 1.527036010742190001e+03 -1.277500000000000000e+02 5.675000000000000000e+01
5.600000000000000000e+01 4.560846153846150060e+02 2.545673370361330115e+02 -6.054779052734380329e+00 2.344596087932590001e-01 2.857142857142859829e-02 7.420563964843750000e+02 6.994502544403079503e-01 4.000000000000000000e+00 1.448170654296880002e+03 -1.272500000000000000e+02 5.675000000000000000e+01
3.300000000000000000e+01 4.465230769230769852e+02 2.509973297119140057e+02 -5.963836669921880329e+00 2.905060648918150190e-01 2.941176593303679865e-01 7.911646118164060226e+02 5.541741847991940029e-01 3.000000000000000000e+00 1.539390747070309999e+03 -1.267500000000000000e+02 5.675000000000000000e+01
1.800000000000000000e+01 4.579153846153849940e+02 2.688228149414060226e+02 -5.872924804687500000e+00 6.375996470451350540e-01 0.000000000000000000e+00 8.402728271484379547e+02 5.477948784828190476e-01 1.000000000000000000e+00 1.754224975585940001e+03 -1.262500000000000000e+02 5.675000000000000000e+01
5.800000000000000000e+01 4.683923076923080089e+02 3.094254150390619884e+02 -5.781982421875000000e+00 9.999999776482580358e-03 5.714285714285709944e-02 8.893810424804689774e+02 6.092009544372559704e-01 4.000000000000000000e+00 1.039800903320309999e+03 -1.257500000000000000e+02 5.675000000000000000e+01
2.100000000000000000e+01 4.817692307692310010e+02 3.489649963378910229e+02 -5.388153076171880329e+00 2.953705191612239767e-01 2.857142857142859829e-02 9.701447753906250000e+02 8.418766260147090286e-01 3.000000000000000000e+00 1.216271362304690001e+03 -1.252500000000000000e+02 5.675000000000000000e+01
6.000000000000000000e+01 5.461384615384620247e+02 3.702340087890619884e+02 -4.398498535156250000e+00 3.990282714366910066e-01 2.857142857142859829e-02 1.152776000976559999e+03 6.390140652656559617e-01 4.000000000000000000e+00 1.595127685546880002e+03 -1.242500000000000000e+02 5.675000000000000000e+01
3.200000000000000000e+01 5.813153846153850282e+02 3.610560913085939774e+02 -3.903656005859379885e+00 2.138707488775249965e-01 5.714285714285709944e-02 1.244091552734380002e+03 6.253269314765930176e-01 3.000000000000000000e+00 1.701721069335940001e+03 -1.237500000000000000e+02 5.675000000000000000e+01
2.800000000000000000e+01 5.978461538461540385e+02 3.376579895019530113e+02 -3.357238769531250000e+00 3.824036121368409868e-01 1.428571428571429880e-01 1.350040039062500000e+03 1.351862668991089977e+00 3.000000000000000000e+00 1.647563232421880002e+03 -1.232500000000000000e+02 5.675000000000000000e+01
5.700000000000000000e+01 5.867923076923079861e+02 3.064940795898439774e+02 -2.810791015625000000e+00 9.999999776482580358e-03 2.941176593303679865e-01 1.455988525390619998e+03 1.405443549156190075e+00 4.000000000000000000e+00 9.221422729492189774e+02 -1.227500000000000000e+02 5.675000000000000000e+01
6.600000000000000000e+01 5.570692307692310123e+02 2.762347412109380116e+02 -2.264373779296879885e+00 0.000000000000000000e+00 1.428571428571429880e-01 1.561937011718750000e+03 7.626212835311889648e-01 4.000000000000000000e+00 8.477975463867189774e+02 -1.222500000000000000e+02 5.675000000000000000e+01
6.400000000000000000e+01 5.258153846153840050e+02 2.528988800048830115e+02 -1.790039062500000000e+00 0.000000000000000000e+00 8.823529481887819603e-01 1.658492431640619998e+03 9.534007906913759545e-01 4.000000000000000000e+00 8.437325439453120453e+02 -1.217500000000000000e+02 5.675000000000000000e+01
6.100000000000000000e+01 4.621923076923080203e+02 2.318126068115230112e+02 -1.274017333984380107e+00 0.000000000000000000e+00 2.352941185235979948e-01 1.795244506835940001e+03 1.485294222831730071e+00 4.000000000000000000e+00 6.920971069335939774e+02 -1.207500000000000000e+02 5.675000000000000000e+01
2.900000000000000000e+01 4.577692307692310010e+02 2.314430847167969887e+02 -1.015991210937500000e+00 0.000000000000000000e+00 2.571428571428570065e-01 1.863620483398440001e+03 1.380946397781370072e+00 3.000000000000000000e+00 7.454740600585939774e+02 -1.202500000000000000e+02 5.675000000000000000e+01
5.400000000000000000e+01 4.498000000000000114e+02 2.303856353759769888e+02 -8.631896972656250000e-01 9.999999776482580358e-03 8.571428571428570120e-02 1.918013916015619998e+03 1.539471149444580078e+00 4.000000000000000000e+00 1.018953735351559999e+03 -1.197500000000000000e+02 5.675000000000000000e+01
6.000000000000000000e+01 4.403615384615379753e+02 2.234953308105469887e+02 -8.155822753906250000e-01 9.999999776482580358e-03 1.142857142857140046e-01 1.958424804687500000e+03 1.739179015159610042e+00 4.000000000000000000e+00 9.697991333007810226e+02 -1.192500000000000000e+02 5.675000000000000000e+01
7.100000000000000000e+01 4.341769230769230035e+02 2.100059661865230112e+02 -7.679443359375000000e-01 9.999999776482580358e-03 1.142857142857140046e-01 1.998835571289059999e+03 1.778101563453670098e+00 4.000000000000000000e+00 8.963223876953120453e+02 -1.187500000000000000e+02 5.675000000000000000e+01
5.800000000000000000e+01 4.241999999999999886e+02 1.990981140136719887e+02 -7.203369140625000000e-01 9.999999776482580358e-03 2.352941185235979948e-01 2.039246459960940001e+03 7.711677551269530140e-01 4.000000000000000000e+00 7.250090332031250000e+02 -1.182500000000000000e+02 5.675000000000000000e+01
4.300000000000000000e+01 4.079307692307689877e+02 1.963520965576169885e+02 -7.326354980468750000e-01 0.000000000000000000e+00 5.714285714285709944e-02 2.066191162109380002e+03 9.821509122848509632e-01 3.000000000000000000e+00 6.353192749023439774e+02 -1.177500000000000000e+02 5.675000000000000000e+01
5.200000000000000000e+01 3.928615384615389985e+02 1.977949523925780113e+02 -7.649230957031250000e-01 0.000000000000000000e+00 0.000000000000000000e+00 2.088646972656250000e+03 8.100055456161500134e-01 4.000000000000000000e+00 3.481019897460939774e+02 -1.172500000000000000e+02 5.675000000000000000e+01
3.000000000000000000e+01 4.100923076923079975e+02 2.036791992187500000e+02 -7.972106933593750000e-01 0.000000000000000000e+00 5.714285714285709944e-02 2.111102783203119998e+03 7.969426512718199573e-01 3.000000000000000000e+00 6.282386474609379547e+02 -1.167500000000000000e+02 5.675000000000000000e+01
3.200000000000000000e+01 4.227153846153839822e+02 2.124671630859380116e+02 -8.294982910156250000e-01 0.000000000000000000e+00 8.823529481887819603e-01 2.133558593750000000e+03 7.837064266204829543e-01 3.000000000000000000e+00 6.901253051757810226e+02 -1.162500000000000000e+02 5.675000000000000000e+01
6.400000000000000000e+01 4.264384615384619792e+02 2.208876495361330115e+02 -8.983154296875000000e-01 0.000000000000000000e+00 8.571428571428570120e-02 2.144128417968750000e+03 7.877682447433469459e-01 4.000000000000000000e+00 6.908616943359379547e+02 -1.157500000000000000e+02 5.675000000000000000e+01
4.600000000000000000e+01 4.299846153846149832e+02 2.288690643310550001e+02 -1.035919189453119893e+00 9.999999776482580358e-03 5.882353186607359730e-01 2.165268310546880002e+03 8.000431060791020066e-01 4.000000000000000000e+00 7.196154785156250000e+02 -1.147500000000000000e+02 5.675000000000000000e+01
5.700000000000000000e+01 4.333307692307690218e+02 2.298825531005859943e+02 -1.115661621093750000e+00 9.999999776482580358e-03 2.857142857142859829e-02 2.172659667968750000e+03 1.408658862113949972e+00 4.000000000000000000e+00 7.054881591796879547e+02 -1.142500000000000000e+02 5.675000000000000000e+01
2.200000000000000000e+01 4.242923076923079861e+02 2.279756011962890057e+02 -1.228302001953119893e+00 0.000000000000000000e+00 7.058823704719540126e-01 2.170515869140619998e+03 8.488017320632930129e-01 3.000000000000000000e+00 5.139351806640620453e+02 -1.137500000000000000e+02 5.675000000000000000e+01
5.100000000000000000e+01 4.245846153846150060e+02 2.194317321777340055e+02 -1.340972900390619893e+00 0.000000000000000000e+00 1.142857142857140046e-01 2.168372070312500000e+03 1.771889805793759987e+00 4.000000000000000000e+00 5.051378784179689774e+02 -1.132500000000000000e+02 5.675000000000000000e+01
2.900000000000000000e+01 4.309384615384610129e+02 2.114120178222659945e+02 -1.453613281250000000e+00 0.000000000000000000e+00 5.714285714285709944e-02 2.166228271484380002e+03 1.963922023773190029e+00 3.000000000000000000e+00 4.784439697265619884e+02 -1.127500000000000000e+02 5.675000000000000000e+01
3.300000000000000000e+01 4.384923076923070084e+02 2.056430358886719887e+02 -1.588500976562500000e+00 9.999999776482580358e-03 8.571428571428570120e-02 2.157108642578119998e+03 1.974638223648069957e+00 3.000000000000000000e+00 4.786342773437500000e+02 -1.122500000000000000e+02 5.675000000000000000e+01
5.900000000000000000e+01 4.414769230769230148e+02 2.043950653076169885e+02 -1.745605468750000000e+00 9.999999776482580358e-03 9.411764740943909802e-01 2.141013183593750000e+03 1.912528514862060103e+00 4.000000000000000000e+00 4.962392272949219887e+02 -1.117500000000000000e+02 5.675000000000000000e+01
6.400000000000000000e+01 4.371846153846149718e+02 2.065232849121090055e+02 -1.902709960937500000e+00 0.000000000000000000e+00 4.705882370471949905e-01 2.124917724609380002e+03 2.002460956573489881e+00 4.000000000000000000e+00 3.916175842285160229e+02 -1.112500000000000000e+02 5.675000000000000000e+01
5.300000000000000000e+01 4.388461538461539817e+02 2.080594787597659945e+02 -2.059814453125000000e+00 9.999999776482580358e-03 1.142857142857140046e-01 2.108822265625000000e+03 1.991370201110840066e+00 4.000000000000000000e+00 4.098586425781250000e+02 -1.107500000000000000e+02 5.675000000000000000e+01
4.100000000000000000e+01 4.366538461538460183e+02 2.092561187744140057e+02 -2.277038574218750000e+00 9.999999776482580358e-03 3.142857142857140018e-01 2.083184082031250000e+03 1.963650465011600010e+00 3.000000000000000000e+00 4.836795959472660229e+02 -1.102500000000000000e+02 5.675000000000000000e+01
6.100000000000000000e+01 4.419384615384610129e+02 2.126550598144530113e+02 -2.514282226562500000e+00 9.999999776482580358e-03 7.058823704719540126e-01 2.054364746093750000e+03 1.946008920669560105e+00 4.000000000000000000e+00 3.883375854492189774e+02 -1.097500000000000000e+02 5.675000000000000000e+01
7.000000000000000000e+01 4.347846153846149946e+02 2.200259552001949999e+02 -2.751525878906250000e+00 9.999999776482580358e-03 8.823529481887819603e-01 2.025545532226559999e+03 1.941999077796940032e+00 4.000000000000000000e+00 4.347467346191410229e+02 -1.092500000000000000e+02 5.675000000000000000e+01
5.100000000000000000e+01 4.461230769230770079e+02 2.656887207031250000e+02 -3.423065185546879885e+00 1.092520207166669949e-01 5.882353186607359730e-01 1.946463623046880002e+03 1.908072471618649901e+00 4.000000000000000000e+00 4.732763061523439774e+02 -1.077500000000000000e+02 5.675000000000000000e+01
2.800000000000000000e+01 4.530615384615380208e+02 2.791433410644530113e+02 -3.640228271484379885e+00 1.128201112151149960e-01 1.058823585510249909e+00 1.921332275390619998e+03 1.890824675560000001e+00 3.000000000000000000e+00 4.864904479980469887e+02 -1.072500000000000000e+02 5.675000000000000000e+01
4.100000000000000000e+01 4.671769230769230035e+02 2.880640258789060226e+02 -3.829925537109379885e+00 1.720694899559019886e-01 9.411764740943909802e-01 1.898032104492190001e+03 1.879934787750239922e+00 3.000000000000000000e+00 5.725459594726560226e+02 -1.067500000000000000e+02 5.675000000000000000e+01
2.500000000000000000e+01 4.798769230769229921e+02 2.955856323242189774e+02 -3.937286376953120115e+00 1.654020547866819901e-01 9.411764740943909802e-01 1.880225341796880002e+03 1.866891860961910066e+00 3.000000000000000000e+00 5.427844848632810226e+02 -1.062500000000000000e+02 5.675000000000000000e+01
2.900000000000000000e+01 4.833461538461539817e+02 2.995864868164060226e+02 -4.044677734375000000e+00 1.800345033407209916e-01 5.294117927551269531e-01 1.862418457031250000e+03 1.855069398879999998e+00 3.000000000000000000e+00 5.403253784179689774e+02 -1.057500000000000000e+02 5.675000000000000000e+01
3.500000000000000000e+01 4.890461538461540272e+02 3.062185974121089771e+02 -4.152038574218750000e+00 1.952537894248959904e-01 8.823529481887819603e-01 1.844611694335940001e+03 1.852768421173099922e+00 3.000000000000000000e+00 5.247486572265620453e+02 -1.052500000000000000e+02 5.675000000000000000e+01
4.300000000000000000e+01 5.003538461538460069e+02 3.197544860839839771e+02 -4.243133544921880329e+00 2.078127712011340056e-01 1.058823585510249909e+00 1.831039794921880002e+03 1.843329310417179956e+00 3.000000000000000000e+00 4.846112060546880116e+02 -1.047500000000000000e+02 5.675000000000000000e+01
3.200000000000000000e+01 5.129615384615379980e+02 3.367129516601560226e+02 -4.317901611328119671e+00 1.989043354988100087e-01 5.882353186607359730e-01 1.821702636718750000e+03 1.830039978027339975e+00 3.000000000000000000e+00 4.010250244140619884e+02 -1.042500000000000000e+02 5.675000000000000000e+01
5.600000000000000000e+01 5.187999999999999545e+02 3.515463562011719887e+02 -4.392700195312500000e+00 1.941363364458079943e-01 8.823529481887819603e-01 1.812365600585940001e+03 1.818963170051570044e+00 4.000000000000000000e+00 3.819588012695310226e+02 -1.037500000000000000e+02 5.675000000000000000e+01
5.400000000000000000e+01 5.222384615384610242e+02 3.594412841796880116e+02 -4.467498779296880329e+00 2.442105859518050037e-01 1.000000000000000000e+00 1.803028564453119998e+03 1.807148933410640090e+00 4.000000000000000000e+00 4.035211791992189774e+02 -1.032500000000000000e+02 5.675000000000000000e+01
4.300000000000000000e+01 5.096307692307689763e+02 3.325089111328119884e+02 -4.665435791015619671e+00 2.663718461990359776e-01 2.571428571428570065e-01 1.782586547851559999e+03 1.799769520759580077e+00 3.000000000000000000e+00 3.496846313476560226e+02 -1.022500000000000000e+02 5.675000000000000000e+01
3.200000000000000000e+01 4.962615384615380094e+02 2.849113464355469887e+02 -4.870269775390619671e+00 3.280487358570099987e-01 6.470588445663449928e-01 1.761891967773440001e+03 1.811867952346799981e+00 3.000000000000000000e+00 3.763193054199219887e+02 -1.012500000000000000e+02 5.675000000000000000e+01
5.700000000000000000e+01 4.925307692307690104e+02 2.841690368652339771e+02 -5.013427734375000000e+00 3.084786534309389983e-01 5.294117927551269531e-01 1.751348388671880002e+03 1.822149157524109997e+00 4.000000000000000000e+00 3.164296875000000000e+02 -1.007500000000000000e+02 5.675000000000000000e+01
4.000000000000000000e+01 4.874230769230770193e+02 2.856107788085939774e+02 -5.156616210937500000e+00 3.212280571460719991e-01 2.941176593303679865e-01 1.740804809570309999e+03 1.829453229904169920e+00 3.000000000000000000e+00 2.859982910156250000e+02 -1.002500000000000000e+02 5.675000000000000000e+01
3.000000000000000000e+00 7.928230769230769965e+02 2.786210021972660229e+02 2.230590820312500000e+00 0.000000000000000000e+00 0.000000000000000000e+00 1.661344726562500000e+03 1.418226361274719904e+00 1.000000000000000000e+00 3.356635808944699928e+00 -1.582500000000000000e+02 5.725000000000000000e+01
1.800000000000000000e+01 7.968230769230769965e+02 2.811988525390619884e+02 2.127014160156250000e+00 0.000000000000000000e+00 0.000000000000000000e+00 1.687110961914059999e+03 1.401799917221070002e+00 1.000000000000000000e+00 7.856430053710940165e+00 -1.577500000000000000e+02 5.725000000000000000e+01
9.000000000000000000e+00 8.028692307692309669e+02 2.911051940917969887e+02 2.057708740234379885e+00 0.000000000000000000e+00 0.000000000000000000e+00 1.681320800781250000e+03 1.363577008247379929e+00 1.000000000000000000e+00 2.034709167480469887e+02 -1.572500000000000000e+02 5.725000000000000000e+01
1.000000000000000000e+00 8.226769230769230035e+02 3.093578186035160229e+02 2.022705078125000000e+00 0.000000000000000000e+00 0.000000000000000000e+00 1.643974121093750000e+03 1.351155042648320093e+00 1.000000000000000000e+00 4.606279296875000000e+02 -1.567500000000000000e+02 5.725000000000000000e+01
1.000000000000000000e+00 1.017161538461539976e+03 6.596281738281250000e+02 -1.707977294921880107e+00 2.963816821575159799e-01 0.000000000000000000e+00 9.688404541015620453e+02 1.019819498062130014e+00 1.000000000000000000e+00 9.131657104492189774e+02 -1.317500000000000000e+02 5.725000000000000000e+01
3.000000000000000000e+00 7.961538461538459615e+02 6.227647094726560226e+02 -3.048828125000000000e+00 2.234651446342469927e-01 0.000000000000000000e+00 8.928980712890620453e+02 1.065313100814820002e+00 1.000000000000000000e+00 1.594329956054690001e+03 -1.307500000000000000e+02 5.725000000000000000e+01
4.000000000000000000e+00 6.278769230769230489e+02 4.875441589355469887e+02 -4.407867431640619671e+00 2.452850788831709983e-01 0.000000000000000000e+00 8.418760375976560226e+02 1.112051844596859906e+00 1.000000000000000000e+00 1.424351074218750000e+03 -1.297500000000000000e+02 5.725000000000000000e+01
5.900000000000000000e+01 5.330307692307690104e+02 4.039462585449219887e+02 -5.480194091796880329e+00 1.809304654598239970e-01 0.000000000000000000e+00 7.762827758789060226e+02 1.080671906471249999e+00 4.000000000000000000e+00 1.343769165039059999e+03 -1.287500000000000000e+02 5.725000000000000000e+01
7.000000000000000000e+00 4.863461538461539817e+02 3.544927368164060226e+02 -5.930358886718750000e+00 6.053611040115359776e-01 0.000000000000000000e+00 7.391148681640620453e+02 7.237938046455379970e-01 1.000000000000000000e+00 1.649273681640619998e+03 -1.282500000000000000e+02 5.725000000000000000e+01
3.000000000000000000e+01 4.544923076923079748e+02 2.750342407226560226e+02 -6.380493164062500000e+00 1.798716932535170121e-01 0.000000000000000000e+00 7.019468994140620453e+02 6.843717098236079543e-01 3.000000000000000000e+00 1.500064575195309999e+03 -1.277500000000000000e+02 5.725000000000000000e+01
1.000000000000000000e+01 4.348999999999999773e+02 2.247291870117190058e+02 -6.428924560546880329e+00 3.637582957744600054e-01 8.571428571428570120e-02 7.453228759765620453e+02 5.490740537643430397e-01 1.000000000000000000e+00 1.274034057617190001e+03 -1.267500000000000000e+02 5.725000000000000000e+01
2.000000000000000000e+00 4.536923076923080203e+02 2.349074401855469887e+02 -6.311187744140619671e+00 7.842121124267580345e-01 8.571428571428570120e-02 7.866294555664060226e+02 5.454359650611879662e-01 1.000000000000000000e+00 1.788893554687500000e+03 -1.262500000000000000e+02 5.725000000000000000e+01
2.500000000000000000e+01 4.643384615384609901e+02 2.783491516113280113e+02 -6.193420410156250000e+00 5.868690609931950242e-01 8.571428571428570120e-02 8.279360961914060226e+02 8.186552524566650391e-01 3.000000000000000000e+00 1.422997436523440001e+03 -1.257500000000000000e+02 5.725000000000000000e+01
5.400000000000000000e+01 4.738846153846150173e+02 3.157766723632810226e+02 -5.735565185546880329e+00 9.999999776482580358e-03 0.000000000000000000e+00 9.258630371093750000e+02 1.515167355537410110e+00 4.000000000000000000e+00 9.387832641601560226e+02 -1.252500000000000000e+02 5.725000000000000000e+01
4.000000000000000000e+00 5.187307692307690559e+02 3.263305969238280113e+02 -5.164306640625000000e+00 5.606896877288819470e-01 0.000000000000000000e+00 1.042663452148440001e+03 7.478442788124080032e-01 1.000000000000000000e+00 1.608623046875000000e+03 -1.247500000000000000e+02 5.725000000000000000e+01
4.000000000000000000e+00 5.512769230769230262e+02 3.198932495117189774e+02 -4.593078613281250000e+00 6.853703260421749599e-01 2.857142857142859829e-02 1.159463745117190001e+03 6.690307259559630237e-01 1.000000000000000000e+00 1.664343994140619998e+03 -1.242500000000000000e+02 5.725000000000000000e+01
2.700000000000000000e+01 5.601538461538459615e+02 3.110429382324219887e+02 -4.021850585937500000e+00 5.458564758300780140e-01 5.714285714285709944e-02 1.276264160156250000e+03 6.398625969886779785e-01 3.000000000000000000e+00 1.508186889648440001e+03 -1.237500000000000000e+02 5.725000000000000000e+01
6.000000000000000000e+01 5.401923076923079634e+02 2.730484313964839771e+02 -3.001159667968750000e+00 9.999999776482580358e-03 5.714285714285709944e-02 1.479952392578119998e+03 1.722668290138239966e+00 4.000000000000000000e+00 9.767594604492189774e+02 -1.227500000000000000e+02 5.725000000000000000e+01
7.000000000000000000e+01 5.181923076923079634e+02 2.540864257812500000e+02 -2.490844726562500000e+00 9.999999776482580358e-03 8.571428571428570120e-02 1.581796630859380002e+03 1.814314723014829989e+00 4.000000000000000000e+00 1.018516357421880002e+03 -1.222500000000000000e+02 5.725000000000000000e+01
5.200000000000000000e+01 4.986230769230770079e+02 2.397646636962890057e+02 -2.047119140625000000e+00 0.000000000000000000e+00 7.058823704719540126e-01 1.675483276367190001e+03 1.848354816436770021e+00 4.000000000000000000e+00 8.012402954101560226e+02 -1.217500000000000000e+02 5.725000000000000000e+01
6.600000000000000000e+01 4.727384615384610242e+02 2.354300079345699999e+02 -1.803344726562500000e+00 0.000000000000000000e+00 2.941176593303679865e-01 1.744697509765619998e+03 9.383761286735530227e-01 4.000000000000000000e+00 7.522522583007810226e+02 -1.212500000000000000e+02 5.725000000000000000e+01
3.000000000000000000e+01 4.593307692307699881e+02 2.329232177734380116e+02 -1.559570312500000000e+00 9.999999776482580358e-03 0.000000000000000000e+00 1.813911621093750000e+03 7.473849654197689540e-01 3.000000000000000000e+00 8.090541381835939774e+02 -1.207500000000000000e+02 5.725000000000000000e+01
4.900000000000000000e+01 4.495153846153850168e+02 2.340640106201169885e+02 -1.315795898437500000e+00 9.999999776482580358e-03 2.857142857142859829e-02 1.883125854492190001e+03 9.174457788467409447e-01 4.000000000000000000e+00 8.142835693359379547e+02 -1.202500000000000000e+02 5.725000000000000000e+01
4.700000000000000000e+01 4.357384615384610242e+02 2.358860168457030113e+02 -1.181152343750000000e+00 9.999999776482580358e-03 2.941176593303679865e-01 1.937241210937500000e+03 7.334483861923219994e-01 4.000000000000000000e+00 7.583030395507810226e+02 -1.197500000000000000e+02 5.725000000000000000e+01
3.200000000000000000e+01 4.355923076923079975e+02 2.289242401123050001e+02 -1.155700683593750000e+00 9.999999776482580358e-03 3.529411852359770063e-01 1.976257812500000000e+03 7.660617828369139515e-01 3.000000000000000000e+00 7.299092407226560226e+02 -1.192500000000000000e+02 5.725000000000000000e+01
5.300000000000000000e+01 4.319769230769230148e+02 2.144884033203119884e+02 -1.130249023437500000e+00 1.092151105403900008e-01 3.529411852359770063e-01 2.015274291992190001e+03 7.785140275955200195e-01 4.000000000000000000e+00 9.175413818359379547e+02 -1.187500000000000000e+02 5.725000000000000000e+01
5.100000000000000000e+01 4.231769230769230035e+02 2.041953125000000000e+02 -1.104766845703119893e+00 9.999999776482580358e-03 5.714285714285709944e-02 2.054290771484380002e+03 1.429694414138789949e+00 4.000000000000000000e+00 7.349125976562500000e+02 -1.182500000000000000e+02 5.725000000000000000e+01
6.500000000000000000e+01 4.134923076923079748e+02 1.995298767089840055e+02 -1.141296386718750000e+00 9.999999776482580358e-03 3.529411852359770063e-01 2.076924316406250000e+03 7.774406671524050072e-01 4.000000000000000000e+00 6.025260009765620453e+02 -1.177500000000000000e+02 5.725000000000000000e+01
3.000000000000000000e+00 3.970692307692310123e+02 2.003251800537109943e+02 -1.198516845703119893e+00 0.000000000000000000e+00 5.882353186607359730e-01 2.094096923828119998e+03 8.030723333358760208e-01 1.000000000000000000e+00 4.407807312011719887e+02 -1.172500000000000000e+02 5.725000000000000000e+01
6.900000000000000000e+01 3.949615384615379980e+02 2.064338073730469887e+02 -1.255706787109380107e+00 0.000000000000000000e+00 8.571428571428570120e-02 2.111269531250000000e+03 8.041981458663940430e-01 4.000000000000000000e+00 4.535745239257810226e+02 -1.167500000000000000e+02 5.725000000000000000e+01
3.100000000000000000e+01 4.072846153846149946e+02 2.166608734130859943e+02 -1.312927246093750000e+00 0.000000000000000000e+00 2.857142857142859829e-02 2.128441894531250000e+03 7.829721570014950283e-01 3.000000000000000000e+00 5.714693603515620453e+02 -1.162500000000000000e+02 5.725000000000000000e+01
6.500000000000000000e+01 4.170307692307690104e+02 2.238367309570309942e+02 -1.386901855468750000e+00 9.999999776482580358e-03 1.117647051811220038e+00 2.133804443359380002e+03 1.548531293869020109e+00 4.000000000000000000e+00 8.039204101562500000e+02 -1.157500000000000000e+02 5.725000000000000000e+01
5.800000000000000000e+01 3.993384615384620133e+02 2.266057586669919885e+02 -1.460906982421880107e+00 0.000000000000000000e+00 1.428571428571429880e-01 2.139166992187500000e+03 8.517199158668520287e-01 4.000000000000000000e+00 4.462573852539060226e+02 -1.152500000000000000e+02 5.725000000000000000e+01
3.000000000000000000e+01 4.067769230769230262e+02 2.304970397949219887e+02 -1.534881591796880107e+00 0.000000000000000000e+00 2.857142857142859829e-02 2.144529296875000000e+03 7.995811700820919521e-01 3.000000000000000000e+00 5.153255004882810226e+02 -1.147500000000000000e+02 5.725000000000000000e+01
5.700000000000000000e+01 4.196999999999999886e+02 2.299125213623050001e+02 -1.618652343750000000e+00 9.999999776482580358e-03 1.428571428571429880e-01 2.146578857421880002e+03 1.899190902709960049e+00 4.000000000000000000e+00 6.795982666015620453e+02 -1.142500000000000000e+02 5.725000000000000000e+01
2.400000000000000000e+01 4.296846153846149718e+02 2.253723907470699999e+02 -1.731781005859380107e+00 1.036000922322270063e-01 8.823529481887819603e-01 2.138689697265619998e+03 1.717844128608700061e+00 3.000000000000000000e+00 7.502262573242189774e+02 -1.137500000000000000e+02 5.725000000000000000e+01
5.000000000000000000e+01 4.315384615384620020e+02 2.141341247558590055e+02 -1.844940185546880107e+00 1.399219334125519909e-01 8.823529481887819603e-01 2.130800292968750000e+03 1.854634881019590065e+00 4.000000000000000000e+00 7.818308105468750000e+02 -1.132500000000000000e+02 5.725000000000000000e+01
6.800000000000000000e+01 4.310538461538459956e+02 2.072859191894530113e+02 -1.958068847656250000e+00 9.999999776482580358e-03 2.941176593303679865e-01 2.122911132812500000e+03 1.777912497520450108e+00 4.000000000000000000e+00 6.038594970703120453e+02 -1.127500000000000000e+02 5.725000000000000000e+01
4.600000000000000000e+01 4.273307692307690218e+02 2.025727081298830115e+02 -2.078735351562500000e+00 9.999999776482580358e-03 8.571428571428570120e-02 2.110524414062500000e+03 1.193213224411010076e+00 4.000000000000000000e+00 5.296632080078120453e+02 -1.122500000000000000e+02 5.725000000000000000e+01
4.100000000000000000e+01 4.064615384615379980e+02 2.017117156982419885e+02 -2.206939697265620115e+00 9.999999776482580358e-03 5.294117927551269531e-01 2.093640625000000000e+03 9.205346107482910156e-01 3.000000000000000000e+00 2.971378173828119884e+02 -1.117500000000000000e+02 5.725000000000000000e+01
5.100000000000000000e+01 4.230692307692310123e+02 2.027214202880859943e+02 -2.335174560546879885e+00 9.999999776482580358e-03 1.000000000000000000e+00 2.076756835937500000e+03 1.498359918594359907e+00 4.000000000000000000e+00 3.371441345214839771e+02 -1.112500000000000000e+02 5.725000000000000000e+01
6.000000000000000000e+01 4.377692307692310010e+02 2.053214416503909945e+02 -2.463378906250000000e+00 1.202324405312539951e-01 2.352941185235979948e-01 2.059873046875000000e+03 1.933031916618350055e+00 4.000000000000000000e+00 5.703735961914060226e+02 -1.107500000000000000e+02 5.725000000000000000e+01
2.900000000000000000e+01 4.449076923076920025e+02 2.209482727050780113e+02 -2.843505859375000000e+00 1.095169335603709965e-01 1.352941155433649900e+00 2.005999267578119998e+03 1.831049799919129972e+00 3.000000000000000000e+00 5.242561035156250000e+02 -1.097500000000000000e+02 5.725000000000000000e+01
3.100000000000000000e+01 4.349230769230770193e+02 2.371553955078119884e+02 -3.042419433593750000e+00 1.078123003244400024e-01 5.882353186607359730e-01 1.977626220703119998e+03 1.807619810104369895e+00 3.000000000000000000e+00 4.911202697753910229e+02 -1.092500000000000000e+02 5.725000000000000000e+01
2.700000000000000000e+01 4.401153846153849827e+02 2.563845520019530113e+02 -3.241302490234379885e+00 1.166883781552310040e-01 4.285714285714289917e-01 1.949253173828119998e+03 1.878344058990480070e+00 3.000000000000000000e+00 4.808979492187500000e+02 -1.087500000000000000e+02 5.725000000000000000e+01
3.200000000000000000e+01 4.412923076923079861e+02 2.774743957519530113e+02 -3.442993164062500000e+00 1.356689333915709894e-01 4.000000000000000222e-01 1.922935791015619998e+03 1.869140625000000000e+00 3.000000000000000000e+00 4.913801269531250000e+02 -1.082500000000000000e+02 5.725000000000000000e+01
2.800000000000000000e+01 4.430769230769229807e+02 2.992239074707030113e+02 -3.644683837890620115e+00 1.592159271240229934e-01 5.882353186607359730e-01 1.896618408203119998e+03 1.858438372611999956e+00 3.000000000000000000e+00 5.141320800781250000e+02 -1.077500000000000000e+02 5.725000000000000000e+01
2.900000000000000000e+01 4.492461538461540158e+02 3.114116821289060226e+02 -3.846374511718750000e+00 2.012929320335390126e-01 5.882353186607359730e-01 1.870300903320309999e+03 1.857676625251770020e+00 3.000000000000000000e+00 5.131028442382810226e+02 -1.072500000000000000e+02 5.725000000000000000e+01
2.800000000000000000e+01 4.496076923076919911e+02 3.144537048339839771e+02 -4.030639648437500000e+00 1.642647832632060101e-01 4.285714285714289917e-01 1.845354248046880002e+03 1.871420621871950019e+00 3.000000000000000000e+00 5.081317749023439774e+02 -1.067500000000000000e+02 5.725000000000000000e+01
1.800000000000000000e+01 4.721923076923080203e+02 2.919736022949219887e+02 -4.294525146484380329e+00 2.123487591743470071e-01 8.235294222831730515e-01 1.803685424804690001e+03 1.839838862419129972e+00 1.000000000000000000e+00 5.100896301269530113e+02 -1.057500000000000000e+02 5.725000000000000000e+01
4.100000000000000000e+01 4.846999999999999886e+02 2.951133422851560226e+02 -4.426452636718750000e+00 2.508226037025449995e-01 8.823529481887819603e-01 1.782850952148440001e+03 1.821170210838320092e+00 3.000000000000000000e+00 5.109584655761719887e+02 -1.052500000000000000e+02 5.725000000000000000e+01
5.500000000000000000e+01 4.938923076923080089e+02 3.062112121582030113e+02 -4.548400878906250000e+00 2.484973073005679878e-01 9.411764740943909802e-01 1.765998779296880002e+03 1.809492468833920009e+00 4.000000000000000000e+00 4.891086425781250000e+02 -1.047500000000000000e+02 5.725000000000000000e+01
3.400000000000000000e+01 5.164615384615390212e+02 3.357155151367189774e+02 -4.772308349609380329e+00 2.858597636222839911e-01 9.411764740943909802e-01 1.740259033203119998e+03 1.787099599838259945e+00 3.000000000000000000e+00 4.202059326171880116e+02 -1.037500000000000000e+02 5.725000000000000000e+01
4.500000000000000000e+01 5.203461538461540385e+02 3.438583679199219887e+02 -4.884246826171880329e+00 2.888066470623020243e-01 5.294117927551269531e-01 1.727389282226559999e+03 1.779579877853390002e+00 4.000000000000000000e+00 3.677455444335939774e+02 -1.032500000000000000e+02 5.725000000000000000e+01
3.700000000000000000e+01 4.659769230769230148e+02 2.937352294921880116e+02 -5.413909912109380329e+00 4.223720431327819824e-01 1.058823585510249909e+00 1.671320068359380002e+03 1.775347471237179953e+00 3.000000000000000000e+00 3.808107299804689774e+02 -1.012500000000000000e+02 5.725000000000000000e+01
4.200000000000000000e+01 4.710384615384620020e+02 2.934178771972660229e+02 -5.555847167968750000e+00 4.408752918243409868e-01 7.058823704719540126e-01 1.660681396484380002e+03 1.764027833938599965e+00 3.000000000000000000e+00 3.758079833984380116e+02 -1.007500000000000000e+02 5.725000000000000000e+01
4.500000000000000000e+01 4.711384615384620247e+02 2.938200683593750000e+02 -5.697784423828119671e+00 4.422301948070530009e-01 4.857142857142859871e-01 1.650042724609380002e+03 1.757805466651920057e+00 4.000000000000000000e+00 3.178501586914060226e+02 -1.002500000000000000e+02 5.725000000000000000e+01
1.500000000000000000e+01 7.264307692307689877e+02 2.802866210937500000e+02 9.356079101562500000e-01 0.000000000000000000e+00 0.000000000000000000e+00 1.557641357421880002e+03 1.432432770729060056e+00 1.000000000000000000e+00 3.101769638061519885e+01 -1.572500000000000000e+02 5.775000000000000000e+01
1.600000000000000000e+01 8.086769230769230035e+02 6.375072631835939774e+02 -2.780792236328120115e+00 0.000000000000000000e+00 2.857142857142859829e-02 8.398377075195310226e+02 5.685123801231379836e-01 1.000000000000000000e+00 7.040192871093750000e+02 -1.317500000000000000e+02 5.775000000000000000e+01
1.400000000000000000e+01 6.991230769230769511e+02 5.925213012695310226e+02 -3.242675781250000000e+00 4.293200075626369960e-01 5.882352963089940157e-02 8.740298461914060226e+02 6.021037101745609910e-01 1.000000000000000000e+00 1.606287597656250000e+03 -1.312500000000000000e+02 5.775000000000000000e+01
9.000000000000000000e+00 6.004923076923080316e+02 5.451126708984379547e+02 -3.920196533203120115e+00 5.030638575553889602e-01 2.941176593303679865e-01 8.476970825195310226e+02 6.018102765083309658e-01 1.000000000000000000e+00 1.629610107421880002e+03 -1.307500000000000000e+02 5.775000000000000000e+01
5.000000000000000000e+00 5.084461538461540044e+02 4.785816040039060226e+02 -4.597717285156250000e+00 6.477863788604739659e-01 2.352941185235979948e-01 8.213643798828120453e+02 6.032791137695310280e-01 1.000000000000000000e+00 1.761651733398440001e+03 -1.302500000000000000e+02 5.775000000000000000e+01
4.200000000000000000e+01 4.863000000000000114e+02 4.247384643554689774e+02 -5.275238037109380329e+00 1.912650316953659890e-01 5.714285714285709944e-02 7.950316772460939774e+02 6.740520596504210316e-01 3.000000000000000000e+00 1.272705810546880002e+03 -1.297500000000000000e+02 5.775000000000000000e+01
1.000000000000000000e+01 4.800000000000000000e+02 3.747461853027339771e+02 -5.871856689453119671e+00 4.689984321594239947e-01 0.000000000000000000e+00 7.668782348632810226e+02 5.674309134483339623e-01 1.000000000000000000e+00 1.492357055664059999e+03 -1.292500000000000000e+02 5.775000000000000000e+01
6.000000000000000000e+00 4.715692307692310123e+02 3.275289001464839771e+02 -6.225891113281250000e+00 6.591874361038210228e-01 6.470588445663449928e-01 7.332626342773439774e+02 5.786578655242919922e-01 1.000000000000000000e+00 1.782851928710940001e+03 -1.287500000000000000e+02 5.775000000000000000e+01
2.300000000000000000e+01 4.313769230769229921e+02 2.669116516113280113e+02 -6.933898925781250000e+00 5.586418509483339623e-01 5.882353186607359730e-01 6.660313720703120453e+02 5.554828047752380371e-01 3.000000000000000000e+00 1.301942871093750000e+03 -1.277500000000000000e+02 5.775000000000000000e+01
3.500000000000000000e+01 4.281769230769230035e+02 2.389343109130859943e+02 -7.038604736328119671e+00 1.756360083818440110e-01 2.857142857142859829e-02 6.659760742187500000e+02 8.410159945487980515e-01 3.000000000000000000e+00 1.378708374023440001e+03 -1.272500000000000000e+02 5.775000000000000000e+01
1.000000000000000000e+00 4.398461538461539817e+02 2.200655975341800001e+02 -6.894012451171880329e+00 5.093196630477909714e-01 2.857142857142859829e-02 6.994810791015620453e+02 7.669181823730469860e-01 1.000000000000000000e+00 1.635110595703119998e+03 -1.267500000000000000e+02 5.775000000000000000e+01
4.000000000000000000e+00 4.421230769230770079e+02 2.167504730224609943e+02 -6.749420166015619671e+00 6.313540935516359642e-01 8.571428571428570120e-02 7.329860839843750000e+02 5.777336955070500046e-01 1.000000000000000000e+00 1.693020507812500000e+03 -1.262500000000000000e+02 5.775000000000000000e+01
5.400000000000000000e+01 4.608692307692310237e+02 2.276376190185550001e+02 -6.604858398437500000e+00 2.780036330223080165e-01 8.571428571428570120e-02 7.664911499023439774e+02 5.900778174400329590e-01 4.000000000000000000e+00 1.129942382812500000e+03 -1.257500000000000000e+02 5.775000000000000000e+01
5.800000000000000000e+01 4.973769230769229921e+02 2.453249969482419885e+02 -6.082977294921880329e+00 9.999999776482580358e-03 2.857142857142859829e-02 8.815812377929689774e+02 7.761039733886719860e-01 4.000000000000000000e+00 1.215160278320309999e+03 -1.252500000000000000e+02 5.775000000000000000e+01
3.500000000000000000e+01 5.307692307692309441e+02 2.594459533691410229e+02 -5.435333251953119671e+00 4.888038337230680153e-01 0.000000000000000000e+00 1.023866394042970001e+03 8.156123161315920189e-01 3.000000000000000000e+00 1.838813842773440001e+03 -1.247500000000000000e+02 5.775000000000000000e+01
8.000000000000000000e+00 5.484923076923080316e+02 2.670845642089839771e+02 -4.787689208984380329e+00 9.999999776482580358e-03 2.857142857142859829e-02 1.166151611328119998e+03 8.918290138244630016e-01 1.000000000000000000e+00 1.764339965820309999e+03 -1.242500000000000000e+02 5.775000000000000000e+01
2.900000000000000000e+01 5.386230769230769511e+02 2.670494079589839771e+02 -4.140045166015619671e+00 5.423872470855709560e-01 8.571428571428570120e-02 1.308436767578119998e+03 6.262713074684139736e-01 3.000000000000000000e+00 1.342520629882809999e+03 -1.237500000000000000e+02 5.775000000000000000e+01
6.100000000000000000e+01 5.233307692307689649e+02 2.600173034667969887e+02 -3.665802001953120115e+00 9.999999776482580358e-03 5.714285714285709944e-02 1.406176513671880002e+03 1.339507102966309926e+00 4.000000000000000000e+00 7.947628173828120453e+02 -1.232500000000000000e+02 5.775000000000000000e+01
5.000000000000000000e+01 5.057615384615380094e+02 2.481333160400390057e+02 -3.191528320312500000e+00 0.000000000000000000e+00 0.000000000000000000e+00 1.503916381835940001e+03 1.127241969108579989e+00 4.000000000000000000e+00 7.676683959960939774e+02 -1.227500000000000000e+02 5.775000000000000000e+01
4.700000000000000000e+01 4.852923076923079861e+02 2.381085052490230112e+02 -2.717285156250000000e+00 0.000000000000000000e+00 1.142857142857140046e-01 1.601656127929690001e+03 9.020351767539980248e-01 4.000000000000000000e+00 6.518910522460939774e+02 -1.222500000000000000e+02 5.775000000000000000e+01
6.300000000000000000e+01 4.652692307692310010e+02 2.320787963867190058e+02 -2.304199218750000000e+00 0.000000000000000000e+00 1.142857142857140046e-01 1.692474121093750000e+03 8.282007575035099656e-01 4.000000000000000000e+00 7.376951904296879547e+02 -1.217500000000000000e+02 5.775000000000000000e+01
6.000000000000000000e+01 4.512461538461540158e+02 2.300938873291019888e+02 -2.074676513671879885e+00 9.999999776482580358e-03 0.000000000000000000e+00 1.762526489257809999e+03 9.609574079513549805e-01 4.000000000000000000e+00 6.850808105468750000e+02 -1.212500000000000000e+02 5.775000000000000000e+01
5.200000000000000000e+01 4.421692307692309782e+02 2.317936248779300001e+02 -1.845123291015619893e+00 9.999999776482580358e-03 8.571428571428570120e-02 1.832578857421880002e+03 1.127763986587519973e+00 4.000000000000000000e+00 6.186144409179689774e+02 -1.207500000000000000e+02 5.775000000000000000e+01
6.200000000000000000e+01 4.372153846153850054e+02 2.351145172119140057e+02 -1.615570068359380107e+00 9.999999776482580358e-03 2.352941185235979948e-01 1.902631225585940001e+03 8.713065981864930309e-01 4.000000000000000000e+00 6.974038696289060226e+02 -1.202500000000000000e+02 5.775000000000000000e+01
2.800000000000000000e+01 4.330538461538459956e+02 2.353929443359380116e+02 -1.499145507812500000e+00 1.401926279067990111e-01 6.470588445663449928e-01 1.956468505859380002e+03 1.722680926322939898e+00 3.000000000000000000e+00 9.127709350585939774e+02 -1.197500000000000000e+02 5.775000000000000000e+01
3.800000000000000000e+01 4.290769230769229807e+02 2.285574951171880116e+02 -1.495819091796880107e+00 9.999999776482580358e-03 8.571428571428570120e-02 1.994090820312500000e+03 7.283022999763489880e-01 3.000000000000000000e+00 7.612780761718750000e+02 -1.192500000000000000e+02 5.775000000000000000e+01
3.700000000000000000e+01 4.273307692307690218e+02 2.178316650390619884e+02 -1.492523193359380107e+00 9.999999776482580358e-03 5.714285714285709944e-02 2.031713012695309999e+03 7.499065399169919655e-01 3.000000000000000000e+00 5.481998291015620453e+02 -1.187500000000000000e+02 5.775000000000000000e+01
5.900000000000000000e+01 4.305769230769229807e+02 2.083454284667969887e+02 -1.489196777343750000e+00 9.999999776482580358e-03 2.857142857142859829e-02 2.069335205078119998e+03 7.633247375488280140e-01 4.000000000000000000e+00 6.836484375000000000e+02 -1.182500000000000000e+02 5.775000000000000000e+01
1.100000000000000000e+01 4.270538461538459956e+02 2.016386108398440058e+02 -1.549957275390619893e+00 9.999999776482580358e-03 1.176470637321469948e+00 2.087657714843750000e+03 7.799261808395390183e-01 1.000000000000000000e+00 4.175655822753910229e+02 -1.177500000000000000e+02 5.775000000000000000e+01
2.300000000000000000e+01 4.012461538461540158e+02 1.986123962402340055e+02 -1.632080078125000000e+00 0.000000000000000000e+00 5.294117927551269531e-01 2.099546875000000000e+03 8.007909059524539463e-01 3.000000000000000000e+00 3.594786376953119884e+02 -1.172500000000000000e+02 5.775000000000000000e+01
6.200000000000000000e+01 3.876923076923080203e+02 1.994416046142580115e+02 -1.714202880859380107e+00 0.000000000000000000e+00 1.117647051811220038e+00 2.111436279296880002e+03 8.027375936508179821e-01 4.000000000000000000e+00 4.105360412597660229e+02 -1.167500000000000000e+02 5.775000000000000000e+01
6.200000000000000000e+01 3.985461538461540272e+02 2.054399871826169885e+02 -1.796325683593750000e+00 1.076871231198310019e-01 8.571428571428570120e-02 2.123325439453119998e+03 7.808768153190609462e-01 4.000000000000000000e+00 7.328495483398439774e+02 -1.162500000000000000e+02 5.775000000000000000e+01
5.800000000000000000e+01 4.079769230769230148e+02 2.124262695312500000e+02 -1.875518798828119893e+00 1.237134560942649980e-01 5.714285714285709944e-02 2.123480468750000000e+03 7.703679800033570446e-01 4.000000000000000000e+00 7.766375122070310226e+02 -1.157500000000000000e+02 5.775000000000000000e+01
4.800000000000000000e+01 3.935230769230769852e+02 2.169663085937500000e+02 -1.954681396484380107e+00 0.000000000000000000e+00 2.352941185235979948e-01 2.123635498046880002e+03 7.903667092323299892e-01 4.000000000000000000e+00 3.590269775390619884e+02 -1.152500000000000000e+02 5.775000000000000000e+01
4.700000000000000000e+01 3.915461538461540272e+02 2.184765625000000000e+02 -2.033874511718750000e+00 0.000000000000000000e+00 2.857142857142859760e-01 2.123790527343750000e+03 1.016253829002379927e+00 4.000000000000000000e+00 3.872422790527339771e+02 -1.147500000000000000e+02 5.775000000000000000e+01
4.600000000000000000e+01 3.920307692307690104e+02 2.151854705810550001e+02 -2.121643066406250000e+00 9.999999776482580358e-03 5.882352963089940157e-02 2.120498291015619998e+03 7.915457487106319912e-01 4.000000000000000000e+00 4.095000000000000000e+02 -1.142500000000000000e+02 5.775000000000000000e+01
4.100000000000000000e+01 4.060000000000000000e+02 2.081214141845699999e+02 -2.235260009765620115e+00 9.999999776482580358e-03 8.571428571428570120e-02 2.106863281250000000e+03 1.138409733772280052e+00 3.000000000000000000e+00 5.785454711914060226e+02 -1.137500000000000000e+02 5.775000000000000000e+01
3.800000000000000000e+01 4.175615384615380208e+02 1.990290527343750000e+02 -2.348907470703120115e+00 1.372101604938510133e-01 8.571428571428570120e-02 2.093228515625000000e+03 1.841278553009030095e+00 3.000000000000000000e+00 6.724682006835939774e+02 -1.132500000000000000e+02 5.775000000000000000e+01
3.500000000000000000e+01 4.250307692307690104e+02 1.968849182128909945e+02 -2.462524414062500000e+00 1.547920703887940008e-01 5.882353186607359730e-01 2.079593750000000000e+03 1.807643413543700062e+00 3.000000000000000000e+00 6.743713989257810226e+02 -1.127500000000000000e+02 5.775000000000000000e+01
4.500000000000000000e+01 4.280615384615380208e+02 1.970266113281250000e+02 -2.568969726562500000e+00 2.051587253808979938e-01 2.857142857142859829e-02 2.063940185546880002e+03 1.843355894088750002e+00 4.000000000000000000e+00 7.484093017578120453e+02 -1.122500000000000000e+02 5.775000000000000000e+01
4.800000000000000000e+01 3.996538461538460183e+02 1.965950927734380116e+02 -2.668304443359379885e+00 9.999999776482580358e-03 2.352941185235979948e-01 2.046268066406250000e+03 1.187364935874940075e+00 4.000000000000000000e+00 3.531981201171880116e+02 -1.117500000000000000e+02 5.775000000000000000e+01
2.400000000000000000e+01 4.018692307692310237e+02 1.967681732177730112e+02 -2.767639160156250000e+00 9.999999776482580358e-03 8.235294222831730515e-01 2.028595947265619998e+03 1.890872597694400081e+00 3.000000000000000000e+00 2.874864501953119884e+02 -1.112500000000000000e+02 5.775000000000000000e+01
3.700000000000000000e+01 4.068615384615379753e+02 1.977231750488280113e+02 -2.866943359375000000e+00 9.999999776482580358e-03 5.882353186607359730e-01 2.010923828125000000e+03 1.959787249565120071e+00 3.000000000000000000e+00 3.144049072265619884e+02 -1.107500000000000000e+02 5.775000000000000000e+01
2.800000000000000000e+01 4.203230769230769965e+02 2.014634857177730112e+02 -3.012207031250000000e+00 9.999999776482580358e-03 8.823529481887819603e-01 1.985560546875000000e+03 1.914776682853700063e+00 3.000000000000000000e+00 3.781493225097660229e+02 -1.102500000000000000e+02 5.775000000000000000e+01
2.200000000000000000e+01 4.385923076923079975e+02 2.130251617431640057e+02 -3.172760009765620115e+00 1.587763726711269863e-01 7.058823704719540126e-01 1.957633666992190001e+03 1.870482683181760031e+00 3.000000000000000000e+00 4.971483459472660229e+02 -1.097500000000000000e+02 5.775000000000000000e+01
3.200000000000000000e+01 4.349615384615379980e+02 2.317527923583980112e+02 -3.333312988281250000e+00 1.688603162765499877e-01 7.058823704719540126e-01 1.929706787109380002e+03 1.849941968917850010e+00 3.000000000000000000e+00 5.472156982421879547e+02 -1.092500000000000000e+02 5.775000000000000000e+01
3.000000000000000000e+01 4.328461538461539817e+02 2.539479217529300001e+02 -3.493865966796879885e+00 1.842788755893710051e-01 1.142857142857140046e-01 1.901780029296880002e+03 1.837812662124630014e+00 3.000000000000000000e+00 5.287326660156250000e+02 -1.087500000000000000e+02 5.775000000000000000e+01
2.400000000000000000e+01 4.370384615384620020e+02 2.831225585937500000e+02 -3.680084228515620115e+00 1.982862651348110128e-01 1.117647051811220038e+00 1.874276489257809999e+03 1.807712554931639959e+00 3.000000000000000000e+00 5.321732177734379547e+02 -1.082500000000000000e+02 5.775000000000000000e+01
1.800000000000000000e+01 4.365615384615389871e+02 3.168639221191410229e+02 -4.052551269531250000e+00 2.438279986381529929e-01 7.058823704719540126e-01 1.819269653320309999e+03 1.827819585800170010e+00 1.000000000000000000e+00 5.271271972656250000e+02 -1.072500000000000000e+02 5.775000000000000000e+01
2.700000000000000000e+01 4.558307692307690218e+02 2.958060913085939774e+02 -4.544372558593750000e+00 2.948631048202510208e-01 1.058823585510249909e+00 1.744952270507809999e+03 1.810978531837460048e+00 3.000000000000000000e+00 5.389927368164060226e+02 -1.057500000000000000e+02 5.775000000000000000e+01
2.500000000000000000e+01 4.766615384615379867e+02 2.959395446777339771e+02 -4.700897216796880329e+00 3.586188554763790060e-01 8.823529481887819603e-01 1.721090087890619998e+03 1.789695858955379970e+00 3.000000000000000000e+00 5.786427001953120453e+02 -1.052500000000000000e+02 5.775000000000000000e+01
3.100000000000000000e+01 4.881538461538460183e+02 3.018468627929689774e+02 -4.853698730468750000e+00 3.281227946281429775e-01 5.999999999999999778e-01 1.700957763671880002e+03 1.778569221496580033e+00 3.000000000000000000e+00 4.950986633300780113e+02 -1.047500000000000000e+02 5.775000000000000000e+01
3.600000000000000000e+01 5.059461538461540044e+02 3.105176086425780113e+02 -5.002777099609380329e+00 3.418975770473480225e-01 5.882353186607359730e-01 1.684555175781250000e+03 1.766097187995909978e+00 3.000000000000000000e+00 4.580931091308589771e+02 -1.042500000000000000e+02 5.775000000000000000e+01
2.500000000000000000e+01 5.183846153846150173e+02 3.210273437500000000e+02 -5.151885986328119671e+00 3.203043043613429952e-01 9.411764740943909802e-01 1.668152587890619998e+03 1.755675077438350051e+00 3.000000000000000000e+00 4.121267395019530113e+02 -1.037500000000000000e+02 5.775000000000000000e+01
4.200000000000000000e+01 4.835153846153850168e+02 3.343789978027339771e+02 -5.462097167968750000e+00 3.631293475627899725e-01 1.117647051811220038e+00 1.634269042968750000e+03 1.748024940490719992e+00 3.000000000000000000e+00 3.572171630859380116e+02 -1.027500000000000000e+02 5.775000000000000000e+01
3.000000000000000000e+01 4.535538461538459956e+02 3.009506530761719887e+02 -6.238983154296880329e+00 5.872668027877809838e-01 5.294117927551269531e-01 1.559280639648440001e+03 1.453210949897770110e+00 3.000000000000000000e+00 3.872427978515619884e+02 -1.002500000000000000e+02 5.775000000000000000e+01
2.100000000000000000e+01 6.425615384615380208e+02 2.867566223144530113e+02 -2.558898925781250000e-01 0.000000000000000000e+00 0.000000000000000000e+00 1.377186279296880002e+03 1.410113811492919922e+00 3.000000000000000000e+00 7.189234924316410513e+01 -1.567500000000000000e+02 5.825000000000000000e+01
1.700000000000000000e+01 6.959538461538460297e+02 3.036594238281250000e+02 -3.792724609375000000e-01 0.000000000000000000e+00 0.000000000000000000e+00 1.294947021484380002e+03 1.356590032577509986e+00 1.000000000000000000e+00 1.500119628906250000e+02 -1.562500000000000000e+02 5.825000000000000000e+01
1.600000000000000000e+01 7.614846153846159496e+02 3.291861267089839771e+02 -5.026550292968750000e-01 0.000000000000000000e+00 0.000000000000000000e+00 1.212707763671880002e+03 1.234374642372130015e+00 1.000000000000000000e+00 3.695742187500000000e+02 -1.557500000000000000e+02 5.825000000000000000e+01
0.000000000000000000e+00 8.185076923076919684e+02 4.041735229492189774e+02 -6.872558593750000000e-02 9.999999776482580358e-03 0.000000000000000000e+00 1.285666259765619998e+03 1.308036327362060103e+00 1.000000000000000000e+00 6.833048706054689774e+02 -1.552500000000000000e+02 5.825000000000000000e+01
1.000000000000000000e+00 8.198846153846150173e+02 6.713184814453120453e+02 -3.060455322265620115e+00 1.013775914907460024e-01 0.000000000000000000e+00 5.906886596679689774e+02 1.235301613807679999e+00 1.000000000000000000e+00 1.056302856445309999e+03 -1.327500000000000000e+02 5.825000000000000000e+01
3.000000000000000000e+00 7.293769230769230489e+02 6.583901367187500000e+02 -3.399566650390620115e+00 5.780478715896609776e-01 5.714285714285709944e-02 6.724946899414060226e+02 8.803886175155639648e-01 1.000000000000000000e+00 1.489282714843750000e+03 -1.322500000000000000e+02 5.825000000000000000e+01
3.400000000000000000e+01 6.478307692307689649e+02 5.989210815429689774e+02 -3.738677978515620115e+00 9.999999776482580358e-03 1.058823585510249909e+00 7.543007202148439774e+02 7.893749475479130417e-01 3.000000000000000000e+00 8.728498535156250000e+02 -1.317500000000000000e+02 5.825000000000000000e+01
3.300000000000000000e+01 5.642615384615389758e+02 5.081518859863280113e+02 -4.077819824218750000e+00 2.207370400428770030e-01 2.857142857142859829e-02 8.361066894531250000e+02 8.144469857215880237e-01 3.000000000000000000e+00 1.308355346679690001e+03 -1.312500000000000000e+02 5.825000000000000000e+01
6.600000000000000000e+01 4.815846153846150060e+02 4.291376953125000000e+02 -4.707122802734380329e+00 9.999999776482580358e-03 5.714285714285709944e-02 8.136104125976560226e+02 6.495841741561889648e-01 4.000000000000000000e+00 6.390578613281250000e+02 -1.307500000000000000e+02 5.825000000000000000e+01
6.000000000000000000e+00 4.483153846153850282e+02 3.859625549316410229e+02 -5.336425781250000000e+00 2.891382575035100211e-01 2.352941185235979948e-01 7.911141357421879547e+02 6.332373023033139869e-01 1.000000000000000000e+00 1.399589965820309999e+03 -1.302500000000000000e+02 5.825000000000000000e+01
3.700000000000000000e+01 4.587769230769230262e+02 3.501520996093750000e+02 -5.965728759765619671e+00 6.516054272651670143e-01 5.714285714285709944e-02 7.686177978515620453e+02 5.819591283798219994e-01 3.000000000000000000e+00 1.489490478515619998e+03 -1.297500000000000000e+02 5.825000000000000000e+01
4.100000000000000000e+01 4.561230769230770079e+02 2.942504882812500000e+02 -6.501953125000000000e+00 2.135502547025679987e-01 5.714285714285709944e-02 7.451431884765620453e+02 5.701481699943540260e-01 3.000000000000000000e+00 1.409140869140619998e+03 -1.292500000000000000e+02 5.825000000000000000e+01
1.200000000000000000e+01 4.459461538461540044e+02 2.639035644531250000e+02 -6.758972167968750000e+00 6.829901337623599522e-01 5.882353186607359730e-01 7.187336425781250000e+02 8.746540546417239659e-01 1.000000000000000000e+00 1.551145141601559999e+03 -1.287500000000000000e+02 5.825000000000000000e+01
6.000000000000000000e+00 4.308846153846150173e+02 2.532980499267580115e+02 -7.015991210937500000e+00 4.696177542209630240e-01 2.857142857142859829e-02 6.923240966796879547e+02 5.652295351028440162e-01 1.000000000000000000e+00 1.558250732421880002e+03 -1.282500000000000000e+02 5.825000000000000000e+01
4.200000000000000000e+01 4.256307692307689763e+02 2.387220306396480112e+02 -7.273010253906250000e+00 3.632315099239349920e-01 0.000000000000000000e+00 6.659145507812500000e+02 1.051909089088439941e+00 3.000000000000000000e+00 1.469066406250000000e+03 -1.277500000000000000e+02 5.825000000000000000e+01
5.300000000000000000e+01 4.238153846153840050e+02 2.224646911621090055e+02 -7.311889648437500000e+00 1.123957186937329933e-01 2.857142857142859829e-02 6.679744873046879547e+02 6.652055978775019973e-01 4.000000000000000000e+00 1.522349365234380002e+03 -1.272500000000000000e+02 5.825000000000000000e+01
1.100000000000000000e+01 4.322846153846160178e+02 2.143173980712890057e+02 -7.132629394531250000e+00 6.127375960350039952e-01 8.571428571428570120e-02 6.985039062500000000e+02 6.199421882629390090e-01 1.000000000000000000e+00 1.519599243164059999e+03 -1.267500000000000000e+02 5.825000000000000000e+01
7.000000000000000000e+00 4.532923076923079861e+02 2.143501434326169885e+02 -6.953399658203119671e+00 5.148442983627320446e-01 6.470588445663449928e-01 7.290333251953120453e+02 5.650657415390010208e-01 1.000000000000000000e+00 1.715782592773440001e+03 -1.262500000000000000e+02 5.825000000000000000e+01
3.000000000000000000e+01 4.821461538461539931e+02 2.228186340332030113e+02 -6.774139404296880329e+00 4.763070642948150080e-01 2.941176593303679865e-01 7.595628051757810226e+02 9.601743817329410069e-01 3.000000000000000000e+00 1.673469726562500000e+03 -1.257500000000000000e+02 5.825000000000000000e+01
2.100000000000000000e+01 5.497307692307690559e+02 2.465631103515619884e+02 -4.872100830078119671e+00 9.999999776482580358e-03 3.428571428571430268e-01 1.191261962890619998e+03 1.344340562820429907e+00 3.000000000000000000e+00 1.026642822265619998e+03 -1.242500000000000000e+02 5.825000000000000000e+01
7.000000000000000000e+01 5.204769230769229580e+02 2.466602020263669885e+02 -4.196746826171880329e+00 1.079675927758220050e-01 2.941176593303679865e-01 1.345468139648440001e+03 9.144269824028019578e-01 4.000000000000000000e+00 8.772073974609379547e+02 -1.237500000000000000e+02 5.825000000000000000e+01
7.100000000000000000e+01 4.986999999999999886e+02 2.417642517089840055e+02 -3.763519287109379885e+00 1.465106755495070023e-01 8.571428571428570120e-02 1.438814697265619998e+03 8.119227886199950062e-01 4.000000000000000000e+00 9.043882446289060226e+02 -1.232500000000000000e+02 5.825000000000000000e+01
6.800000000000000000e+01 4.720615384615380208e+02 2.372113037109380116e+02 -3.330291748046879885e+00 0.000000000000000000e+00 0.000000000000000000e+00 1.532161254882809999e+03 7.778859138488769531e-01 4.000000000000000000e+00 5.451927490234379547e+02 -1.227500000000000000e+02 5.825000000000000000e+01
4.000000000000000000e+01 4.592615384615389758e+02 2.332016448974609943e+02 -2.897064208984379885e+00 9.999999776482580358e-03 0.000000000000000000e+00 1.625507812500000000e+03 7.936638593673710496e-01 3.000000000000000000e+00 5.522605590820310226e+02 -1.222500000000000000e+02 5.825000000000000000e+01
6.400000000000000000e+01 4.401692307692309782e+02 2.309798431396480112e+02 -2.520996093750000000e+00 0.000000000000000000e+00 5.882352963089940157e-02 1.712680541992190001e+03 7.999462485313419968e-01 4.000000000000000000e+00 4.006158752441410229e+02 -1.217500000000000000e+02 5.825000000000000000e+01
6.100000000000000000e+01 4.307692307692310010e+02 2.308440093994140057e+02 -2.316375732421879885e+00 0.000000000000000000e+00 2.857142857142859829e-02 1.781331420898440001e+03 8.022971153259279564e-01 4.000000000000000000e+00 4.431065368652339771e+02 -1.212500000000000000e+02 5.825000000000000000e+01
3.000000000000000000e+01 4.274846153846149832e+02 2.330201263427730112e+02 -2.111724853515620115e+00 0.000000000000000000e+00 5.714285714285709944e-02 1.849982421875000000e+03 7.950478196144099563e-01 3.000000000000000000e+00 4.436190185546880116e+02 -1.207500000000000000e+02 5.825000000000000000e+01
3.500000000000000000e+01 4.227384615384619906e+02 2.320932006835940058e+02 -1.907073974609380107e+00 9.999999776482580358e-03 6.470588445663449928e-01 1.918633422851559999e+03 7.826263308525089890e-01 3.000000000000000000e+00 4.870462951660160229e+02 -1.202500000000000000e+02 5.825000000000000000e+01
3.900000000000000000e+01 4.229615384615390212e+02 2.301151885986330115e+02 -1.815490722656250000e+00 9.999999776482580358e-03 1.428571428571429880e-01 1.970269409179690001e+03 7.706828713417049892e-01 3.000000000000000000e+00 5.420344848632810226e+02 -1.197500000000000000e+02 5.825000000000000000e+01
7.000000000000000000e+01 4.275615384615389871e+02 2.213678436279300001e+02 -1.836944580078119893e+00 9.999999776482580358e-03 0.000000000000000000e+00 2.004890625000000000e+03 7.638816237449650437e-01 4.000000000000000000e+00 5.640717773437500000e+02 -1.192500000000000000e+02 5.825000000000000000e+01
5.400000000000000000e+01 4.243461538461539817e+02 2.139420318603519888e+02 -1.858398437500000000e+00 9.999999776482580358e-03 2.857142857142859829e-02 2.039511718750000000e+03 7.677370905876159668e-01 4.000000000000000000e+00 5.275145263671879547e+02 -1.187500000000000000e+02 5.825000000000000000e+01
7.300000000000000000e+01 4.223384615384620133e+02 2.086708831787109943e+02 -1.879852294921880107e+00 9.999999776482580358e-03 2.857142857142859829e-02 2.074132812500000000e+03 7.743366360664369896e-01 4.000000000000000000e+00 5.375090332031250000e+02 -1.182500000000000000e+02 5.825000000000000000e+01
4.000000000000000000e+01 4.151769230769230035e+02 2.019382629394530113e+02 -1.960845947265619893e+00 9.999999776482580358e-03 2.352941185235979948e-01 2.088341064453119998e+03 7.849051952362060547e-01 3.000000000000000000e+00 3.739469299316410229e+02 -1.177500000000000000e+02 5.825000000000000000e+01
4.400000000000000000e+01 4.012230769230769738e+02 1.953795166015619884e+02 -2.061645507812500000e+00 9.999999776482580358e-03 2.352941185235979948e-01 2.095744628906250000e+03 7.982833981513980381e-01 3.000000000000000000e+00 3.323123779296880116e+02 -1.172500000000000000e+02 5.825000000000000000e+01
4.700000000000000000e+01 3.871769230769230035e+02 1.932219085693359943e+02 -2.162445068359379885e+00 9.999999776482580358e-03 5.882352963089940157e-02 2.103148437500000000e+03 8.137629032135009766e-01 4.000000000000000000e+00 3.181690063476560226e+02 -1.167500000000000000e+02 5.825000000000000000e+01
6.100000000000000000e+01 3.769692307692300233e+02 1.959255523681640057e+02 -2.346862792968750000e+00 0.000000000000000000e+00 3.529411852359770063e-01 2.105877197265619998e+03 8.178757429122920364e-01 4.000000000000000000e+00 2.688203430175780113e+02 -1.157500000000000000e+02 5.825000000000000000e+01
3.400000000000000000e+01 3.752153846153850054e+02 1.944000854492190058e+02 -2.430480957031250000e+00 0.000000000000000000e+00 3.529411852359770063e-01 2.101202148437500000e+03 8.117823004722599656e-01 3.000000000000000000e+00 2.703141174316410229e+02 -1.152500000000000000e+02 5.825000000000000000e+01
5.100000000000000000e+01 3.761769230769230035e+02 1.942090454101559942e+02 -2.514099121093750000e+00 9.999999776482580358e-03 2.352941185235979948e-01 2.096527343750000000e+03 8.115171194076540306e-01 4.000000000000000000e+00 2.849963378906250000e+02 -1.147500000000000000e+02 5.825000000000000000e+01
4.900000000000000000e+01 3.703230769230769965e+02 1.881341857910159945e+02 -2.603851318359379885e+00 9.999999776482580358e-03 8.235294222831730515e-01 2.088632324218750000e+03 8.102934956550600365e-01 4.000000000000000000e+00 2.674658508300780113e+02 -1.142500000000000000e+02 5.825000000000000000e+01
4.600000000000000000e+01 3.747076923076920139e+02 1.808583679199219887e+02 -2.711975097656250000e+00 9.999999776482580358e-03 5.882353186607359730e-01 2.071078369140619998e+03 8.052722811698910244e-01 4.000000000000000000e+00 2.417357482910159945e+02 -1.137500000000000000e+02 5.825000000000000000e+01
5.900000000000000000e+01 3.768538461538460069e+02 1.787155456542969887e+02 -2.820098876953120115e+00 9.999999776482580358e-03 1.428571428571429880e-01 2.053524169921880002e+03 7.955778837203979492e-01 4.000000000000000000e+00 2.607147521972660229e+02 -1.132500000000000000e+02 5.825000000000000000e+01
4.500000000000000000e+01 3.829076923076920025e+02 1.813922271728519888e+02 -2.928222656250000000e+00 9.999999776482580358e-03 2.571428571428570065e-01 2.035969848632809999e+03 7.848302721977229446e-01 4.000000000000000000e+00 2.825210266113280113e+02 -1.127500000000000000e+02 5.825000000000000000e+01
4.000000000000000000e+01 3.799692307692309896e+02 1.871651611328119884e+02 -3.093322753906250000e+00 9.999999776482580358e-03 2.941176593303679865e-01 1.999167480468750000e+03 8.836737871170039504e-01 3.000000000000000000e+00 2.126194000244140057e+02 -1.117500000000000000e+02 5.825000000000000000e+01
8.000000000000000000e+00 3.838384615384620133e+02 1.870737457275390057e+02 -3.167327880859379885e+00 9.999999776482580358e-03 1.000000000000000000e+00 1.980484008789059999e+03 1.785886645317080079e+00 1.000000000000000000e+00 2.494145355224609943e+02 -1.112500000000000000e+02 5.825000000000000000e+01
2.600000000000000000e+01 3.849769230769230148e+02 1.868345642089840055e+02 -3.241363525390620115e+00 9.999999776482580358e-03 8.823529481887819603e-01 1.961800537109380002e+03 1.964111089706420010e+00 3.000000000000000000e+00 2.889446411132810226e+02 -1.107500000000000000e+02 5.825000000000000000e+01
5.000000000000000000e+01 4.007230769230769738e+02 1.918876953125000000e+02 -3.489044189453120115e+00 1.339871734380720103e-01 5.882353186607359730e-01 1.908430419921880002e+03 1.921383857727049893e+00 4.000000000000000000e+00 3.346384277343750000e+02 -1.097500000000000000e+02 5.825000000000000000e+01
2.600000000000000000e+01 4.013999999999999773e+02 2.015235290527340055e+02 -3.619995117187500000e+00 1.711897104978560014e-01 9.411764740943909802e-01 1.880602294921880002e+03 1.886167764663700064e+00 3.000000000000000000e+00 4.475781860351560226e+02 -1.092500000000000000e+02 5.825000000000000000e+01
2.600000000000000000e+01 4.088230769230769965e+02 2.158459167480469887e+02 -3.750946044921879885e+00 2.052894979715350066e-01 1.176470637321469948e+00 1.852774169921880002e+03 1.853970289230350010e+00 3.000000000000000000e+00 4.630595092773439774e+02 -1.087500000000000000e+02 5.825000000000000000e+01
2.700000000000000000e+01 4.160153846153850168e+02 2.395843353271480112e+02 -3.929351806640620115e+00 2.414403259754180076e-01 1.470588207244869938e+00 1.823611450195309999e+03 1.829946994781489922e+00 3.000000000000000000e+00 4.849678649902339771e+02 -1.082500000000000000e+02 5.825000000000000000e+01
2.600000000000000000e+01 4.207615384615380094e+02 2.722099304199219887e+02 -4.107757568359380329e+00 2.589192986488340065e-01 8.235294222831730515e-01 1.794448730468750000e+03 1.810299158096309924e+00 3.000000000000000000e+00 4.730669860839839771e+02 -1.077500000000000000e+02 5.825000000000000000e+01
2.200000000000000000e+01 4.289538461538459728e+02 2.852927856445310226e+02 -4.286163330078119671e+00 3.277138173580170233e-01 8.235294222831730515e-01 1.765286010742190001e+03 1.797295093536380062e+00 3.000000000000000000e+00 5.239920043945310226e+02 -1.072500000000000000e+02 5.825000000000000000e+01
4.400000000000000000e+01 4.218846153846150173e+02 2.855356750488280113e+02 -4.465423583984380329e+00 3.038172721862790193e-01 1.058823585510249909e+00 1.736766113281250000e+03 1.807134985923769976e+00 3.000000000000000000e+00 5.058576965332030113e+02 -1.067500000000000000e+02 5.825000000000000000e+01
3.500000000000000000e+01 4.252230769230769738e+02 2.830647888183589771e+02 -4.647338867187500000e+00 2.426997572183610119e-01 9.411764740943909802e-01 1.710175048828119998e+03 1.813366651535029961e+00 3.000000000000000000e+00 3.682754211425780113e+02 -1.062500000000000000e+02 5.825000000000000000e+01
4.200000000000000000e+01 4.333153846153850282e+02 2.812583618164060226e+02 -4.829254150390619671e+00 2.909487187862400126e-01 5.882353186607359730e-01 1.683583984375000000e+03 1.802895069122310012e+00 3.000000000000000000e+00 3.825940551757810226e+02 -1.057500000000000000e+02 5.825000000000000000e+01
2.900000000000000000e+01 4.552923076923079861e+02 2.872917480468750000e+02 -5.011169433593750000e+00 3.398587107658390116e-01 5.882353186607359730e-01 1.656992919921880002e+03 1.780368804931639959e+00 3.000000000000000000e+00 4.521507263183589771e+02 -1.052500000000000000e+02 5.825000000000000000e+01
3.300000000000000000e+01 4.730538461538459956e+02 2.968239135742189774e+02 -5.194335937500000000e+00 3.770907521247859884e-01 7.647058963775630325e-01 1.633955810546880002e+03 1.756484031677250091e+00 3.000000000000000000e+00 4.461995544433589771e+02 -1.047500000000000000e+02 5.825000000000000000e+01
2.900000000000000000e+01 4.928692307692310237e+02 3.093068542480469887e+02 -5.378753662109380329e+00 4.320435523986819737e-01 2.941176593303679865e-01 1.614472778320309999e+03 1.739588022232060105e+00 3.000000000000000000e+00 4.836087341308589771e+02 -1.042500000000000000e+02 5.825000000000000000e+01
3.800000000000000000e+01 4.367769230769230262e+02 3.334732360839839771e+02 -6.314575195312500000e+00 5.791662335395809658e-01 3.142857142857140018e-01 1.515548217773440001e+03 1.685005307197569913e+00 3.000000000000000000e+00 3.609707031250000000e+02 -1.017500000000000000e+02 5.825000000000000000e+01
3.000000000000000000e+01 4.300384615384620020e+02 3.229053955078119884e+02 -6.503967285156250000e+00 5.887231826782229893e-01 4.000000000000000222e-01 1.495516357421880002e+03 1.675298810005189987e+00 3.000000000000000000e+00 3.646385192871089771e+02 -1.012500000000000000e+02 5.825000000000000000e+01
2.400000000000000000e+01 4.361000000000000227e+02 3.083139343261719887e+02 -6.774536132812500000e+00 6.840905547142029919e-01 3.428571428571430268e-01 1.473927124023440001e+03 1.400400519371030050e+00 3.000000000000000000e+00 4.086869506835939774e+02 -1.002500000000000000e+02 5.825000000000000000e+01
1.400000000000000000e+01 5.545846153846159723e+02 2.949879455566410229e+02 -1.163696289062500000e+00 0.000000000000000000e+00 0.000000000000000000e+00 1.351076782226559999e+03 1.406412124633789951e+00 1.000000000000000000e+00 2.835841369628910158e+01 -1.567500000000000000e+02 5.875000000000000000e+01
1.600000000000000000e+01 6.155615384615380208e+02 3.083537597656250000e+02 -1.245758056640619893e+00 0.000000000000000000e+00 0.000000000000000000e+00 1.284845703125000000e+03 1.380150914192199929e+00 1.000000000000000000e+00 6.028699493408200283e+01 -1.562500000000000000e+02 5.875000000000000000e+01
5.500000000000000000e+01 6.914153846153840277e+02 3.289900817871089771e+02 -1.327819824218750000e+00 0.000000000000000000e+00 0.000000000000000000e+00 1.218614624023440001e+03 1.332372665405270107e+00 4.000000000000000000e+00 2.200412292480469887e+02 -1.557500000000000000e+02 5.875000000000000000e+01
1.000000000000000000e+00 8.220538461538460524e+02 4.623785400390619884e+02 -5.185241699218750000e-01 1.162906810641290006e-01 0.000000000000000000e+00 1.319087768554690001e+03 1.249743819236760034e+00 1.000000000000000000e+00 8.843853149414060226e+02 -1.547500000000000000e+02 5.875000000000000000e+01
9.000000000000000000e+00 8.938769230769220258e+02 5.563351440429689774e+02 -4.434204101562500000e-02 9.999999776482580358e-03 0.000000000000000000e+00 1.385962646484380002e+03 1.256611108779909891e+00 1.000000000000000000e+00 5.533591308593750000e+02 -1.542500000000000000e+02 5.875000000000000000e+01
3.400000000000000000e+01 7.169461538461539476e+02 6.567028808593750000e+02 -3.198699951171879885e+00 1.230447441339490022e-01 8.571428571428570120e-02 6.678005981445310226e+02 1.221224904060359995e+00 3.000000000000000000e+00 1.130247802734380002e+03 -1.332500000000000000e+02 5.875000000000000000e+01
2.600000000000000000e+01 6.508846153846150173e+02 6.573059692382810226e+02 -3.673065185546879885e+00 9.999999776482580358e-03 2.941176593303679865e-01 6.687486572265620453e+02 6.568356156349179908e-01 3.000000000000000000e+00 4.532764892578119884e+02 -1.327500000000000000e+02 5.875000000000000000e+01
3.300000000000000000e+01 5.868769230769230489e+02 6.422792968750000000e+02 -4.058258056640619671e+00 0.000000000000000000e+00 5.714285714285709944e-02 7.166347045898439774e+02 6.477363109588619716e-01 3.000000000000000000e+00 7.253424682617189774e+02 -1.322500000000000000e+02 5.875000000000000000e+01
3.900000000000000000e+01 5.331153846153849827e+02 5.650626831054689774e+02 -4.443450927734380329e+00 1.029197052121160055e-01 3.529411852359770063e-01 7.645208129882810226e+02 6.292614340782169968e-01 3.000000000000000000e+00 9.947812500000000000e+02 -1.317500000000000000e+02 5.875000000000000000e+01
4.700000000000000000e+01 4.888846153846150173e+02 4.541648864746089771e+02 -4.828613281250000000e+00 1.579161584377289929e-01 2.857142857142859829e-02 8.124069213867189774e+02 6.061234474182130016e-01 4.000000000000000000e+00 9.782969360351560226e+02 -1.312500000000000000e+02 5.875000000000000000e+01
9.000000000000000000e+00 4.756384615384610015e+02 2.423702392578119884e+02 -6.665618896484380329e+00 6.113899350166319691e-01 5.714285714285709944e-02 7.781264038085939774e+02 1.120804667472840022e+00 1.000000000000000000e+00 1.495916992187500000e+03 -1.292500000000000000e+02 5.875000000000000000e+01
1.000000000000000000e+00 4.504153846153849940e+02 2.293562622070309942e+02 -6.823730468750000000e+00 7.296712398529050514e-01 0.000000000000000000e+00 7.669722900390620453e+02 9.581543803215030186e-01 1.000000000000000000e+00 1.663129638671880002e+03 -1.287500000000000000e+02 5.875000000000000000e+01
1.100000000000000000e+01 4.290461538461540272e+02 2.165439605712890057e+02 -6.981842041015619671e+00 7.065474390983580433e-01 2.941176593303679865e-01 7.558181762695310226e+02 5.845831036567690209e-01 1.000000000000000000e+00 1.498361938476559999e+03 -1.282500000000000000e+02 5.875000000000000000e+01
5.700000000000000000e+01 4.242153846153839822e+02 2.031742553710940058e+02 -7.139984130859380329e+00 2.834667861461639959e-01 9.411764740943909802e-01 7.446640625000000000e+02 6.097804903984069824e-01 4.000000000000000000e+00 1.157246704101559999e+03 -1.277500000000000000e+02 5.875000000000000000e+01
2.000000000000000000e+00 4.643692307692310237e+02 2.094931335449219887e+02 -6.641143798828119671e+00 6.058967113494869716e-01 5.714285714285709944e-02 8.345514526367189774e+02 7.636117935180659622e-01 1.000000000000000000e+00 1.821093750000000000e+03 -1.262500000000000000e+02 5.875000000000000000e+01
6.300000000000000000e+01 5.227999999999999545e+02 2.268004913330080115e+02 -5.905364990234380329e+00 1.391110271215439953e-01 1.428571428571429880e-01 9.844677124023439774e+02 6.100638508796689674e-01 4.000000000000000000e+00 1.399731079101559999e+03 -1.252500000000000000e+02 5.875000000000000000e+01
4.000000000000000000e+00 5.610230769230770420e+02 2.315497436523440058e+02 -5.309600830078119671e+00 3.595970869064329944e-01 1.714285714285710138e-01 1.120713134765619998e+03 6.415659189224239833e-01 1.000000000000000000e+00 1.590552001953119998e+03 -1.247500000000000000e+02 5.875000000000000000e+01
5.300000000000000000e+01 5.342923076923079861e+02 2.318565216064449999e+02 -4.713806152343750000e+00 9.999999776482580358e-03 5.714285714285709944e-02 1.256958496093750000e+03 6.903602480888370030e-01 4.000000000000000000e+00 7.037526245117189774e+02 -1.242500000000000000e+02 5.875000000000000000e+01
5.300000000000000000e+01 4.994692307692309896e+02 2.303717193603519888e+02 -4.118011474609380329e+00 0.000000000000000000e+00 8.571428571428570120e-02 1.393203857421880002e+03 7.495966553688050427e-01 4.000000000000000000e+00 5.272769165039060226e+02 -1.237500000000000000e+02 5.875000000000000000e+01
5.400000000000000000e+01 4.771230769230770079e+02 2.316675720214840055e+02 -3.736694335937500000e+00 0.000000000000000000e+00 5.294117927551269531e-01 1.481520751953119998e+03 7.830346822738649681e-01 4.000000000000000000e+00 4.430471801757810226e+02 -1.232500000000000000e+02 5.875000000000000000e+01
5.500000000000000000e+01 4.499153846153849940e+02 2.315417938232419885e+02 -3.355377197265620115e+00 9.999999776482580358e-03 8.571428571428570120e-02 1.569837524414059999e+03 8.057860136032100051e-01 4.000000000000000000e+00 3.673180847167969887e+02 -1.227500000000000000e+02 5.875000000000000000e+01
5.600000000000000000e+01 4.342615384615389758e+02 2.309400482177730112e+02 -2.974060058593750000e+00 9.999999776482580358e-03 2.857142857142859829e-02 1.658154418945309999e+03 8.104405999183650344e-01 4.000000000000000000e+00 3.888390502929689774e+02 -1.222500000000000000e+02 5.875000000000000000e+01
4.400000000000000000e+01 4.290000000000000000e+02 2.298511199951169885e+02 -2.649017333984379885e+00 9.999999776482580358e-03 5.714285714285709944e-02 1.739970947265619998e+03 7.996915578842159755e-01 3.000000000000000000e+00 4.927422790527339771e+02 -1.217500000000000000e+02 5.875000000000000000e+01
5.700000000000000000e+01 4.214615384615390212e+02 2.296247711181640057e+02 -2.492767333984379885e+00 9.999999776482580358e-03 0.000000000000000000e+00 1.802286621093750000e+03 7.905312180519099563e-01 4.000000000000000000e+00 5.070513610839839771e+02 -1.212500000000000000e+02 5.875000000000000000e+01
6.200000000000000000e+01 4.183846153846159837e+02 2.300007476806640057e+02 -2.336547851562500000e+00 9.999999776482580358e-03 5.714285714285709944e-02 1.864602294921880002e+03 7.849220633506770461e-01 4.000000000000000000e+00 4.129908752441410229e+02 -1.207500000000000000e+02 5.875000000000000000e+01
4.600000000000000000e+01 4.140769230769229807e+02 2.277980957031250000e+02 -2.180328369140620115e+00 9.999999776482580358e-03 5.882352963089940157e-02 1.926917968750000000e+03 7.873484492301939808e-01 4.000000000000000000e+00 3.525266723632810226e+02 -1.202500000000000000e+02 5.875000000000000000e+01
3.300000000000000000e+01 4.125846153846150060e+02 2.223017883300780113e+02 -2.128234863281250000e+00 0.000000000000000000e+00 2.352941185235979948e-01 1.972115966796880002e+03 7.885382175445559971e-01 3.000000000000000000e+00 3.475440979003910229e+02 -1.197500000000000000e+02 5.875000000000000000e+01
3.700000000000000000e+01 4.147076923076920139e+02 2.176736755371090055e+02 -2.180236816406250000e+00 0.000000000000000000e+00 2.352941185235979948e-01 2.000196044921880002e+03 7.842153906822200149e-01 3.000000000000000000e+00 3.281127014160160229e+02 -1.192500000000000000e+02 5.875000000000000000e+01
4.000000000000000000e+01 4.020461538461540272e+02 2.110450134277340055e+02 -2.284271240234379885e+00 9.999999776482580358e-03 5.294117927551269531e-01 2.056356445312500000e+03 7.784197926521300159e-01 3.000000000000000000e+00 3.522243041992189774e+02 -1.182500000000000000e+02 5.875000000000000000e+01
4.800000000000000000e+01 4.012230769230769738e+02 2.023582458496090055e+02 -2.376586914062500000e+00 9.999999776482580358e-03 2.941176593303679865e-01 2.066883300781250000e+03 7.758083939552310460e-01 4.000000000000000000e+00 3.846161804199219887e+02 -1.177500000000000000e+02 5.875000000000000000e+01
4.600000000000000000e+01 3.950538461538459956e+02 1.926926879882809942e+02 -2.482360839843750000e+00 9.999999776482580358e-03 2.857142857142859829e-02 2.071559326171880002e+03 7.759904265403749779e-01 4.000000000000000000e+00 3.529247436523439774e+02 -1.172500000000000000e+02 5.875000000000000000e+01
6.500000000000000000e+01 3.829538461538459728e+02 1.918682708740230112e+02 -2.588134765625000000e+00 9.999999776482580358e-03 2.857142857142859829e-02 2.076235351562500000e+03 7.761378884315489612e-01 4.000000000000000000e+00 4.277127685546880116e+02 -1.167500000000000000e+02 5.875000000000000000e+01
7.000000000000000000e+01 3.828923076923080089e+02 1.910076293945309942e+02 -2.693908691406250000e+00 1.122093200683590003e-01 2.941176593303679865e-01 2.080911132812500000e+03 8.621255755424499512e-01 4.000000000000000000e+00 4.694892578125000000e+02 -1.162500000000000000e+02 5.875000000000000000e+01
3.000000000000000000e+01 3.927769230769230262e+02 1.857354125976559942e+02 -2.866638183593750000e+00 2.692681550979609817e-01 8.571428571428570120e-02 2.063563720703119998e+03 1.430285096168520065e+00 3.000000000000000000e+00 8.010358886718750000e+02 -1.152500000000000000e+02 5.875000000000000000e+01
5.700000000000000000e+01 3.878692307692310237e+02 1.821224822998050001e+02 -2.953033447265620115e+00 2.309737056493759988e-01 8.571428571428570120e-02 2.054890136718750000e+03 1.453921198844909890e+00 4.000000000000000000e+00 6.751418457031250000e+02 -1.147500000000000000e+02 5.875000000000000000e+01
6.700000000000000000e+01 3.710692307692310123e+02 1.751140747070309942e+02 -3.040161132812500000e+00 9.999999776482580358e-03 6.470588445663449928e-01 2.044022094726559999e+03 9.497783780097960316e-01 4.000000000000000000e+00 3.118008422851560226e+02 -1.142500000000000000e+02 5.875000000000000000e+01
5.300000000000000000e+01 3.617230769230769738e+02 1.693219299316409945e+02 -3.129638671875000000e+00 9.999999776482580358e-03 8.823529481887819603e-01 2.026571533203119998e+03 7.895585298538210228e-01 4.000000000000000000e+00 2.413352661132809942e+02 -1.137500000000000000e+02 5.875000000000000000e+01
5.400000000000000000e+01 3.608384615384620133e+02 1.668519287109380116e+02 -3.219116210937500000e+00 9.999999776482580358e-03 8.235294222831730515e-01 2.009121093750000000e+03 7.930332422256469727e-01 4.000000000000000000e+00 2.306037902832030113e+02 -1.132500000000000000e+02 5.875000000000000000e+01
1.700000000000000000e+01 3.776153846153849827e+02 1.755476837158199999e+02 -3.776763916015620115e+00 1.482727825641630137e-01 2.571428571428570065e-01 1.857381469726559999e+03 1.921410560607909934e+00 1.000000000000000000e+00 2.792590332031250000e+02 -1.097500000000000000e+02 5.875000000000000000e+01
2.500000000000000000e+01 3.839307692307689877e+02 1.802861175537109943e+02 -3.897369384765620115e+00 1.732132881879810127e-01 5.882353186607359730e-01 1.828886596679690001e+03 1.893415093421940032e+00 3.000000000000000000e+00 3.120689086914060226e+02 -1.092500000000000000e+02 5.875000000000000000e+01
3.100000000000000000e+01 4.005076923076920252e+02 2.300062103271480112e+02 -4.392822265625000000e+00 3.341455459594729893e-01 8.823529481887819603e-01 1.736662597656250000e+03 1.804963350296020064e+00 3.000000000000000000e+00 4.409173889160160229e+02 -1.077500000000000000e+02 5.875000000000000000e+01
3.000000000000000000e+01 4.090692307692310123e+02 2.437482757568359943e+02 -4.580230712890619671e+00 3.502398133277889736e-01 1.000000000000000000e+00 1.704798095703119998e+03 1.785682439804080035e+00 3.000000000000000000e+00 4.435332641601560226e+02 -1.072500000000000000e+02 5.875000000000000000e+01
3.200000000000000000e+01 4.104461538461540044e+02 2.489125213623050001e+02 -4.773071289062500000e+00 3.429721891880039841e-01 7.058823704719540126e-01 1.673734130859380002e+03 1.777059197425840065e+00 3.000000000000000000e+00 4.182236022949219887e+02 -1.067500000000000000e+02 5.875000000000000000e+01
2.400000000000000000e+01 4.109846153846149832e+02 2.507818298339840055e+02 -4.982208251953119671e+00 3.622733652591709763e-01 9.411764740943909802e-01 1.645072265625000000e+03 1.786794662475589934e+00 3.000000000000000000e+00 4.010167236328119884e+02 -1.062500000000000000e+02 5.875000000000000000e+01
2.200000000000000000e+01 4.074615384615379980e+02 2.536110229492190058e+02 -5.191314697265619671e+00 3.133870661258699730e-01 1.058823585510249909e+00 1.616410400390619998e+03 1.787120103836060014e+00 3.000000000000000000e+00 2.927539978027339771e+02 -1.057500000000000000e+02 5.875000000000000000e+01
4.500000000000000000e+01 4.302615384615380094e+02 2.640152587890619884e+02 -5.400421142578119671e+00 4.077414870262149882e-01 5.882353186607359730e-01 1.587748413085940001e+03 1.736680507659910111e+00 4.000000000000000000e+00 3.893471374511719887e+02 -1.052500000000000000e+02 5.875000000000000000e+01
3.000000000000000000e+01 4.492153846153850054e+02 2.793763427734380116e+02 -5.612823486328119671e+00 4.225460290908810146e-01 1.470588207244869938e+00 1.562633911132809999e+03 1.734045147895810102e+00 3.000000000000000000e+00 3.904440002441410229e+02 -1.047500000000000000e+02 5.875000000000000000e+01
3.700000000000000000e+01 4.658692307692310237e+02 2.981140747070310226e+02 -5.828582763671880329e+00 4.534741640090940162e-01 8.235294222831730515e-01 1.541066650390619998e+03 1.711630344390870029e+00 3.000000000000000000e+00 3.933500976562500000e+02 -1.042500000000000000e+02 5.875000000000000000e+01
4.000000000000000000e+01 4.395461538461540272e+02 3.403823242187500000e+02 -6.660461425781250000e+00 6.380326151847840466e-01 2.000000000000000111e-01 1.459644775390619998e+03 1.645069122314450016e+00 3.000000000000000000e+00 4.009205932617189774e+02 -1.022500000000000000e+02 5.875000000000000000e+01
2.500000000000000000e+01 4.191153846153849827e+02 3.394075317382810226e+02 -6.858459472656250000e+00 6.523582339286799758e-01 1.714285714285710138e-01 1.440847167968750000e+03 1.638042092323299892e+00 3.000000000000000000e+00 3.710851440429689774e+02 -1.017500000000000000e+02 5.875000000000000000e+01
1.800000000000000000e+01 4.173461538461539817e+02 3.323705749511719887e+02 -7.056457519531250000e+00 7.185570001602169521e-01 3.529411852359770063e-01 1.422049682617190001e+03 1.602336168289179907e+00 1.000000000000000000e+00 3.857591247558589771e+02 -1.012500000000000000e+02 5.875000000000000000e+01
3.900000000000000000e+01 4.153999999999999773e+02 3.151876220703119884e+02 -7.297668457031250000e+00 7.607476711273190029e-01 5.714285714285709944e-02 1.400489013671880002e+03 1.581014394760130060e+00 3.000000000000000000e+00 3.592011413574219887e+02 -1.002500000000000000e+02 5.875000000000000000e+01
1.300000000000000000e+01 6.421923076923079634e+02 2.145358428955080115e+02 -3.681030273437500000e-01 0.000000000000000000e+00 0.000000000000000000e+00 1.411167236328119998e+03 1.332153439521789995e+00 1.000000000000000000e+00 1.335234375000000000e+02 -1.617500000000000000e+02 5.925000000000000000e+01
3.000000000000000000e+00 6.281769230769230035e+02 2.143544311523440058e+02 -5.900268554687500000e-01 9.999999776482580358e-03 0.000000000000000000e+00 1.424078002929690001e+03 1.319358110427859998e+00 1.000000000000000000e+00 9.803054809570309658e+01 -1.612500000000000000e+02 5.925000000000000000e+01
9.000000000000000000e+00 6.144230769230770193e+02 2.179939117431640057e+02 -8.432006835937500000e-01 9.999999776482580358e-03 0.000000000000000000e+00 1.382724731445309999e+03 1.310457110404970038e+00 1.000000000000000000e+00 2.098326416015619884e+02 -1.607500000000000000e+02 5.925000000000000000e+01
1.000000000000000000e+01 6.063999999999999773e+02 2.211834259033199999e+02 -1.096405029296880107e+00 0.000000000000000000e+00 0.000000000000000000e+00 1.341371459960940001e+03 1.303377151489260033e+00 1.000000000000000000e+00 3.004406738281250000e+01 -1.602500000000000000e+02 5.925000000000000000e+01
5.000000000000000000e+00 5.842076923076920139e+02 2.204758758544919885e+02 -1.349609375000000000e+00 9.999999776482580358e-03 0.000000000000000000e+00 1.300018188476559999e+03 1.294961571693419966e+00 1.000000000000000000e+00 4.135659484863280113e+02 -1.597500000000000000e+02 5.925000000000000000e+01
3.100000000000000000e+01 5.582769230769230262e+02 2.099872283935550001e+02 -1.696472167968750000e+00 9.999999776482580358e-03 0.000000000000000000e+00 1.312769409179690001e+03 1.317999243736269976e+00 3.000000000000000000e+00 8.944857025146480112e+01 -1.587500000000000000e+02 5.925000000000000000e+01
6.000000000000000000e+00 5.682230769230769738e+02 2.134196166992190058e+02 -1.822052001953119893e+00 0.000000000000000000e+00 0.000000000000000000e+00 1.347782348632809999e+03 1.368537068366999954e+00 1.000000000000000000e+00 1.171117095947270030e+02 -1.582500000000000000e+02 5.925000000000000000e+01
9.000000000000000000e+00 5.509384615384609560e+02 2.354235534667969887e+02 -1.947631835937500000e+00 0.000000000000000000e+00 0.000000000000000000e+00 1.382795288085940001e+03 1.396888136863710050e+00 1.000000000000000000e+00 4.943094253540039773e+01 -1.577500000000000000e+02 5.925000000000000000e+01
7.000000000000000000e+00 5.398076923076920366e+02 2.668934631347660229e+02 -2.030792236328120115e+00 0.000000000000000000e+00 0.000000000000000000e+00 1.375190185546880002e+03 1.405585289001459959e+00 1.000000000000000000e+00 5.731945800781250000e+01 -1.572500000000000000e+02 5.925000000000000000e+01
1.600000000000000000e+01 5.411846153846149718e+02 2.945973205566410229e+02 -2.071533203125000000e+00 0.000000000000000000e+00 0.000000000000000000e+00 1.324967285156250000e+03 1.414306640625000000e+00 1.000000000000000000e+00 3.071163558959959872e+01 -1.567500000000000000e+02 5.925000000000000000e+01
1.000000000000000000e+01 5.882307692307690559e+02 3.171918334960939774e+02 -2.112274169921879885e+00 0.000000000000000000e+00 0.000000000000000000e+00 1.274744262695309999e+03 1.415042400360110086e+00 1.000000000000000000e+00 2.872714614868160155e+01 -1.562500000000000000e+02 5.925000000000000000e+01
9.000000000000000000e+00 7.123615384615379753e+02 3.855746765136719887e+02 -1.916687011718750000e+00 0.000000000000000000e+00 0.000000000000000000e+00 1.218759643554690001e+03 1.372744441032409890e+00 1.000000000000000000e+00 3.396560668945310226e+02 -1.552500000000000000e+02 5.925000000000000000e+01
1.000000000000000000e+00 5.663692307692309669e+02 6.001725463867189774e+02 -2.729431152343750000e+00 9.999999776482580358e-03 2.857142857142859829e-02 9.165169067382810226e+02 1.069942355155939939e+00 1.000000000000000000e+00 9.901111450195310226e+02 -1.342500000000000000e+02 5.925000000000000000e+01
6.100000000000000000e+01 4.721461538461539931e+02 6.197905273437500000e+02 -3.825286865234379885e+00 1.161423698067669957e-01 2.352941185235979948e-01 7.563543701171879547e+02 5.605302453041079991e-01 4.000000000000000000e+00 8.540681762695310226e+02 -1.332500000000000000e+02 5.925000000000000000e+01
3.500000000000000000e+01 4.666615384615390099e+02 6.007482910156250000e+02 -4.285705566406250000e+00 9.999999776482580358e-03 5.714285714285709944e-02 7.468086547851560226e+02 5.737354159355160244e-01 3.000000000000000000e+00 9.994808349609379547e+02 -1.327500000000000000e+02 5.925000000000000000e+01
6.100000000000000000e+01 4.676999999999999886e+02 5.515164794921879547e+02 -4.716949462890619671e+00 9.999999776482580358e-03 5.714285714285709944e-02 7.607747802734379547e+02 6.074812412261959560e-01 4.000000000000000000e+00 9.700443725585939774e+02 -1.322500000000000000e+02 5.925000000000000000e+01
6.700000000000000000e+01 4.531846153846149718e+02 4.517094116210939774e+02 -5.148193359375000000e+00 1.107365563511849976e-01 8.571428571428570120e-02 7.747409057617189774e+02 6.950842142105100319e-01 4.000000000000000000e+00 9.389863891601560226e+02 -1.317500000000000000e+02 5.925000000000000000e+01
2.600000000000000000e+01 4.428538461538460069e+02 3.503832397460939774e+02 -5.579437255859380329e+00 3.869715034961699884e-01 0.000000000000000000e+00 7.887070922851560226e+02 1.178842186927800073e+00 3.000000000000000000e+00 1.512953125000000000e+03 -1.312500000000000000e+02 5.925000000000000000e+01
1.100000000000000000e+01 4.631769230769230035e+02 2.933020019531250000e+02 -5.908782958984380329e+00 2.903029918670649856e-01 0.000000000000000000e+00 7.944076538085939774e+02 1.141326069831849921e+00 1.000000000000000000e+00 1.299187622070309999e+03 -1.307500000000000000e+02 5.925000000000000000e+01
1.800000000000000000e+01 5.052153846153850054e+02 2.503099670410159945e+02 -6.238128662109380329e+00 3.484050631523130104e-01 0.000000000000000000e+00 8.001082153320310226e+02 1.111364722251890091e+00 1.000000000000000000e+00 1.256541503906250000e+03 -1.302500000000000000e+02 5.925000000000000000e+01
1.800000000000000000e+01 5.031538461538460183e+02 2.061179809570309942e+02 -6.829284667968750000e+00 3.551302254199980024e-01 0.000000000000000000e+00 8.111096191406250000e+02 5.908663868904110439e-01 1.000000000000000000e+00 1.074689331054690001e+03 -1.292500000000000000e+02 5.925000000000000000e+01
2.000000000000000000e+00 4.558923076923080089e+02 1.981125793457030113e+02 -6.888488769531250000e+00 8.232823610305789463e-01 5.714285714285709944e-02 8.152109375000000000e+02 6.085106134414669521e-01 1.000000000000000000e+00 1.743676635742190001e+03 -1.287500000000000000e+02 5.925000000000000000e+01
2.100000000000000000e+01 4.351999999999999886e+02 1.889929962158199999e+02 -6.947723388671880329e+00 3.353024125099179908e-01 5.294117927551269531e-01 8.193123168945310226e+02 1.167865753173829901e+00 3.000000000000000000e+00 1.056640014648440001e+03 -1.282500000000000000e+02 5.925000000000000000e+01
6.700000000000000000e+01 4.273846153846150173e+02 1.777659606933590055e+02 -7.006958007812500000e+00 9.999999776482580358e-03 3.529411852359770063e-01 8.234136352539060226e+02 1.087562322616580035e+00 4.000000000000000000e+00 7.524107055664060226e+02 -1.277500000000000000e+02 5.925000000000000000e+01
6.500000000000000000e+01 4.334615384615379980e+02 1.814068298339840055e+02 -6.895050048828119671e+00 1.357495188713070122e-01 5.294117927551269531e-01 8.483853759765620453e+02 1.085941672325130058e+00 4.000000000000000000e+00 9.120056762695310226e+02 -1.272500000000000000e+02 5.925000000000000000e+01
6.500000000000000000e+01 4.472615384615389758e+02 1.909485473632809942e+02 -6.611968994140619671e+00 4.215718209743499756e-01 0.000000000000000000e+00 8.942274780273439774e+02 1.613663196563720037e+00 4.000000000000000000e+00 1.156309692382809999e+03 -1.267500000000000000e+02 5.925000000000000000e+01
5.000000000000000000e+01 4.676923076923080203e+02 2.003065643310550001e+02 -6.328918457031250000e+00 4.234376847743990258e-01 0.000000000000000000e+00 9.400695800781250000e+02 8.564016819000239700e-01 4.000000000000000000e+00 1.536651733398440001e+03 -1.262500000000000000e+02 5.925000000000000000e+01
7.300000000000000000e+01 4.889076923076920025e+02 2.088290252685550001e+02 -6.045867919921880329e+00 2.328491806983949974e-01 2.857142857142859760e-01 9.859116821289060226e+02 6.598464250564579636e-01 4.000000000000000000e+00 8.869635009765620453e+02 -1.257500000000000000e+02 5.925000000000000000e+01
6.900000000000000000e+01 5.110538461538459956e+02 2.138784179687500000e+02 -5.587921142578119671e+00 0.000000000000000000e+00 2.941176593303679865e-01 1.086085693359380002e+03 6.884217262268069737e-01 4.000000000000000000e+00 6.997587280273439774e+02 -1.252500000000000000e+02 5.925000000000000000e+01
4.500000000000000000e+01 5.159846153846150401e+02 2.143462829589840055e+02 -5.071716308593750000e+00 9.999999776482580358e-03 2.352941185235979948e-01 1.204370361328119998e+03 7.233546376228330299e-01 4.000000000000000000e+00 5.480402832031250000e+02 -1.247500000000000000e+02 5.925000000000000000e+01
6.500000000000000000e+01 5.037461538461540158e+02 2.147613525390619884e+02 -4.555511474609380329e+00 9.999999776482580358e-03 2.857142857142859829e-02 1.322654907226559999e+03 7.615576982498170056e-01 4.000000000000000000e+00 5.742032470703120453e+02 -1.242500000000000000e+02 5.925000000000000000e+01
5.200000000000000000e+01 4.837230769230769738e+02 2.173598022460940058e+02 -4.039306640625000000e+00 9.999999776482580358e-03 1.176470592617989974e-01 1.440939575195309999e+03 7.839096784591670364e-01 4.000000000000000000e+00 4.090567321777339771e+02 -1.237500000000000000e+02 5.925000000000000000e+01
6.700000000000000000e+01 4.631076923076919911e+02 2.210005950927730112e+02 -3.709869384765620115e+00 9.999999776482580358e-03 8.571428571428570120e-02 1.524226684570309999e+03 7.947662472724910110e-01 4.000000000000000000e+00 3.338952026367189774e+02 -1.232500000000000000e+02 5.925000000000000000e+01
4.100000000000000000e+01 4.395538461538459956e+02 2.238087768554690058e+02 -3.380462646484379885e+00 9.999999776482580358e-03 2.857142857142859829e-02 1.607513793945309999e+03 7.985505461692810059e-01 3.000000000000000000e+00 4.293157958984380116e+02 -1.227500000000000000e+02 5.925000000000000000e+01
6.900000000000000000e+01 4.273923076923080089e+02 2.253087921142580115e+02 -3.051025390625000000e+00 9.999999776482580358e-03 2.352941185235979948e-01 1.690800903320309999e+03 7.847914099693299450e-01 4.000000000000000000e+00 4.815521545410160229e+02 -1.222500000000000000e+02 5.925000000000000000e+01
5.100000000000000000e+01 4.225076923076920252e+02 2.252468566894530113e+02 -2.777008056640620115e+00 1.069807708263399992e-01 5.714285714285709944e-02 1.767261352539059999e+03 8.568632006645200416e-01 4.000000000000000000e+00 5.987190551757810226e+02 -1.217500000000000000e+02 5.925000000000000000e+01
5.700000000000000000e+01 4.101769230769230035e+02 2.249274749755859943e+02 -2.669189453125000000e+00 1.289766877889630126e-01 9.411764740943909802e-01 1.823241821289059999e+03 1.836813926696780008e+00 4.000000000000000000e+00 6.520387573242189774e+02 -1.212500000000000000e+02 5.925000000000000000e+01
5.200000000000000000e+01 4.059769230769230148e+02 2.246019592285159945e+02 -2.561370849609379885e+00 1.467883437871929930e-01 2.941176593303679865e-01 1.879222167968750000e+03 9.263657331466670364e-01 4.000000000000000000e+00 6.636641845703120453e+02 -1.207500000000000000e+02 5.925000000000000000e+01
6.400000000000000000e+01 3.955538461538459956e+02 2.229422760009769888e+02 -2.453582763671879885e+00 9.999999776482580358e-03 8.571428571428570120e-02 1.935202636718750000e+03 8.080329298973080165e-01 4.000000000000000000e+00 4.392899780273439774e+02 -1.202500000000000000e+02 5.925000000000000000e+01
4.700000000000000000e+01 3.938999999999999773e+02 2.193304595947269888e+02 -2.440948486328120115e+00 1.210087239742280024e-01 4.705882370471949905e-01 1.973962402343750000e+03 1.845304965972899947e+00 4.000000000000000000e+00 5.753845214843750000e+02 -1.197500000000000000e+02 5.925000000000000000e+01
4.100000000000000000e+01 3.957307692307689990e+02 2.146067504882809942e+02 -2.523529052734379885e+00 1.229731887578959931e-01 7.058823704719540126e-01 1.995501464843750000e+03 1.297066688537600099e+00 3.000000000000000000e+00 5.564678955078120453e+02 -1.192500000000000000e+02 5.925000000000000000e+01
6.700000000000000000e+01 3.908769230769229921e+02 2.120065612792969887e+02 -2.606079101562500000e+00 1.502601802349090021e-01 7.058823704719540126e-01 2.017040649414059999e+03 1.680883765220640091e+00 4.000000000000000000e+00 5.753912963867189774e+02 -1.187500000000000000e+02 5.925000000000000000e+01
4.700000000000000000e+01 3.800384615384620020e+02 2.084234771728519888e+02 -2.688659667968750000e+00 9.999999776482580358e-03 1.764705926179890028e-01 2.038579711914059999e+03 1.066667556762699975e+00 4.000000000000000000e+00 3.957033081054689774e+02 -1.182500000000000000e+02 5.925000000000000000e+01
3.800000000000000000e+01 3.720230769230769852e+02 2.033414611816409945e+02 -2.792358398437500000e+00 1.011370941996569961e-01 5.294117927551269531e-01 2.045425659179690001e+03 7.715992927551269531e-01 3.000000000000000000e+00 3.522026367187500000e+02 -1.177500000000000000e+02 5.925000000000000000e+01
3.300000000000000000e+01 3.601384615384610015e+02 1.971215362548830115e+02 -2.903076171875000000e+00 1.126558035612109931e-01 3.529411852359770063e-01 2.047373901367190001e+03 7.712138295173649460e-01 3.000000000000000000e+00 3.598852539062500000e+02 -1.172500000000000000e+02 5.925000000000000000e+01
2.400000000000000000e+01 3.623384615384609901e+02 1.942418060302730112e+02 -3.013824462890620115e+00 1.591384410858150134e-01 5.882352963089940157e-02 2.049322021484380002e+03 8.845630884170530006e-01 3.000000000000000000e+00 4.436405334472660229e+02 -1.167500000000000000e+02 5.925000000000000000e+01
3.800000000000000000e+01 3.727230769230769738e+02 1.939594573974609943e+02 -3.124542236328120115e+00 3.723830282688139759e-01 5.294117927551269531e-01 2.051270263671880002e+03 1.647759079933170057e+00 3.000000000000000000e+00 7.815612792968750000e+02 -1.162500000000000000e+02 5.925000000000000000e+01
1.600000000000000000e+01 3.886692307692309782e+02 1.930708007812500000e+02 -3.213684082031250000e+00 4.513759016990659956e-01 3.142857142857140018e-01 2.038597778320309999e+03 1.714029192924499956e+00 1.000000000000000000e+00 9.075892333984379547e+02 -1.157500000000000000e+02 5.925000000000000000e+01
2.800000000000000000e+01 3.927230769230769738e+02 1.899723663330080115e+02 -3.302795410156250000e+00 4.433399736881259989e-01 5.882353186607359730e-01 2.025925292968750000e+03 1.663016080856319912e+00 3.000000000000000000e+00 8.828629760742189774e+02 -1.152500000000000000e+02 5.925000000000000000e+01
3.000000000000000000e+01 3.846384615384620247e+02 1.767370147705080115e+02 -3.476501464843750000e+00 4.667664766311649949e-01 8.235294222831730515e-01 1.999411743164059999e+03 1.149738311767579901e+00 3.000000000000000000e+00 7.989467163085939774e+02 -1.142500000000000000e+02 5.925000000000000000e+01
4.400000000000000000e+01 3.571692307692309782e+02 1.696138916015619884e+02 -3.547332763671879885e+00 1.308690756559370005e-01 6.470588445663449928e-01 1.982064941406250000e+03 7.522522211074830212e-01 3.000000000000000000e+00 3.041072082519530113e+02 -1.137500000000000000e+02 5.925000000000000000e+01
3.700000000000000000e+01 3.569461538461540044e+02 1.671310424804690058e+02 -3.618164062500000000e+00 1.401275992393490044e-01 1.588235259056089976e+00 1.964718017578119998e+03 7.725654244422910377e-01 3.000000000000000000e+00 2.853206481933589771e+02 -1.132500000000000000e+02 5.925000000000000000e+01
2.400000000000000000e+01 3.603615384615389985e+02 1.691770324707030113e+02 -3.688964843750000000e+00 1.346904188394550117e-01 1.235294103622440076e+00 1.947371215820309999e+03 7.778527140617369495e-01 3.000000000000000000e+00 2.602776794433589771e+02 -1.127500000000000000e+02 5.925000000000000000e+01
4.500000000000000000e+01 3.661230769230770079e+02 1.723201751708980112e+02 -3.744018554687500000e+00 1.462918817996979870e-01 1.428571428571429880e-01 1.927853393554690001e+03 7.790979743003849656e-01 4.000000000000000000e+00 2.619551086425780113e+02 -1.122500000000000000e+02 5.925000000000000000e+01
5.000000000000000000e+01 3.641384615384620247e+02 1.758897094726559942e+02 -3.783264160156250000e+00 1.465495377779010011e-01 2.857142857142859829e-02 1.906164794921880002e+03 7.828536033630369984e-01 4.000000000000000000e+00 2.434073333740230112e+02 -1.117500000000000000e+02 5.925000000000000000e+01
3.300000000000000000e+01 3.664307692307689877e+02 1.784054412841800001e+02 -3.822479248046879885e+00 1.479393839836120050e-01 1.058823585510249909e+00 1.884476074218750000e+03 8.828405737876889869e-01 3.000000000000000000e+00 2.318492584228519888e+02 -1.112500000000000000e+02 5.925000000000000000e+01
2.200000000000000000e+01 3.682615384615380094e+02 2.309667968750000000e+02 -4.874328613281250000e+00 2.683947980403900146e-01 5.882353186607359730e-01 1.644310180664059999e+03 1.819936156272889960e+00 3.000000000000000000e+00 2.440872802734380116e+02 -1.072500000000000000e+02 5.925000000000000000e+01
5.100000000000000000e+01 4.195000000000000000e+02 2.598552246093750000e+02 -6.031341552734380329e+00 5.126227140426640183e-01 9.411764740943909802e-01 1.491312011718750000e+03 1.707285881042480025e+00 4.000000000000000000e+00 3.690975341796880116e+02 -1.047500000000000000e+02 5.925000000000000000e+01
3.100000000000000000e+01 4.326153846153849827e+02 2.751323242187500000e+02 -6.278381347656250000e+00 5.642337799072270066e-01 8.823529481887819603e-01 1.467660644531250000e+03 1.374882102012630058e+00 3.000000000000000000e+00 3.781706237792969887e+02 -1.042500000000000000e+02 5.925000000000000000e+01
3.400000000000000000e+01 4.316538461538460183e+02 3.188615722656250000e+02 -6.989196777343750000e+00 6.867663860321040481e-01 2.285714285714290084e-01 1.401272705078119998e+03 8.979055881500239700e-01 3.000000000000000000e+00 4.385353698730469887e+02 -1.027500000000000000e+02 5.925000000000000000e+01
3.200000000000000000e+01 4.162846153846149946e+02 3.242938842773439774e+02 -7.195770263671880329e+00 7.250764966011049584e-01 2.857142857142859760e-01 1.383709472656250000e+03 1.593579173088069956e+00 3.000000000000000000e+00 4.247587890625000000e+02 -1.022500000000000000e+02 5.925000000000000000e+01
1.900000000000000000e+01 4.105846153846150060e+02 3.238651428222660229e+02 -7.402343750000000000e+00 7.602939009666439540e-01 1.714285714285710138e-01 1.366146118164059999e+03 1.563656687736509898e+00 1.000000000000000000e+00 4.027012939453119884e+02 -1.017500000000000000e+02 5.925000000000000000e+01
1.900000000000000000e+01 4.031846153846149718e+02 3.201113891601560226e+02 -7.608917236328119671e+00 7.794455289840700463e-01 0.000000000000000000e+00 1.348582885742190001e+03 1.566900968551639961e+00 1.000000000000000000e+00 3.979218444824219887e+02 -1.012500000000000000e+02 5.925000000000000000e+01
3.000000000000000000e+01 3.935153846153850168e+02 3.061887207031250000e+02 -7.820800781250000000e+00 7.931823730468750000e-01 5.294117927551269531e-01 1.327050903320309999e+03 1.278576493263239966e+00 3.000000000000000000e+00 3.407077941894530113e+02 -1.002500000000000000e+02 5.925000000000000000e+01
6.000000000000000000e+00 6.045307692307690104e+02 2.440334625244140057e+02 -1.178619384765619893e+00 9.999999776482580358e-03 0.000000000000000000e+00 1.404621093750000000e+03 1.347933411598210007e+00 1.000000000000000000e+00 1.739257812500000000e+01 -1.617500000000000000e+02 5.975000000000000000e+01
4.000000000000000000e+00 5.825538461538460524e+02 2.419282073974609943e+02 -1.478729248046880107e+00 9.999999776482580358e-03 0.000000000000000000e+00 1.422717651367190001e+03 1.316154837608340067e+00 1.000000000000000000e+00 1.323990325927730112e+02 -1.612500000000000000e+02 5.975000000000000000e+01
6.000000000000000000e+00 5.555384615384620020e+02 2.379585571289059942e+02 -1.806823730468750000e+00 9.999999776482580358e-03 0.000000000000000000e+00 1.363938842773440001e+03 1.258289217948910022e+00 1.000000000000000000e+00 3.185147705078119884e+02 -1.607500000000000000e+02 5.975000000000000000e+01
6.000000000000000000e+00 5.439153846153840277e+02 2.341212921142580115e+02 -2.134948730468750000e+00 1.999669373035430076e-01 0.000000000000000000e+00 1.305159912109380002e+03 1.214372992515559968e+00 1.000000000000000000e+00 5.474117431640620453e+02 -1.602500000000000000e+02 5.975000000000000000e+01
1.000000000000000000e+01 5.380923076923080544e+02 2.307136077880859943e+02 -2.463073730468750000e+00 1.220046803355220033e-01 0.000000000000000000e+00 1.246381103515619998e+03 1.211395740509030095e+00 1.000000000000000000e+00 5.064688110351560226e+02 -1.597500000000000000e+02 5.975000000000000000e+01
7.000000000000000000e+00 5.307076923076920139e+02 2.252395324707030113e+02 -2.871826171875000000e+00 9.999999776482580358e-03 0.000000000000000000e+00 1.291026733398440001e+03 1.366489648818969949e+00 1.000000000000000000e+00 1.410303955078119884e+02 -1.582500000000000000e+02 5.975000000000000000e+01
3.100000000000000000e+01 5.241538461538459615e+02 2.385602874755859943e+02 -2.944091796875000000e+00 9.999999776482580358e-03 0.000000000000000000e+00 1.330462158203119998e+03 1.388224959373469902e+00 3.000000000000000000e+00 1.286154632568359943e+02 -1.577500000000000000e+02 5.975000000000000000e+01
1.100000000000000000e+01 5.181000000000000227e+02 2.634578247070310226e+02 -2.979949951171879885e+00 9.999999776482580358e-03 0.000000000000000000e+00 1.333072509765619998e+03 1.391515970230100097e+00 1.000000000000000000e+00 6.247430038452149859e+01 -1.572500000000000000e+02 5.975000000000000000e+01
1.200000000000000000e+01 5.253230769230769965e+02 2.955141296386719887e+02 -2.979370117187500000e+00 9.999999776482580358e-03 0.000000000000000000e+00 1.298857666015619998e+03 1.380025506019590065e+00 1.000000000000000000e+00 8.043595886230470171e+01 -1.567500000000000000e+02 5.975000000000000000e+01
5.000000000000000000e+00 5.518923076923080089e+02 3.220893859863280113e+02 -2.978759765625000000e+00 9.999999776482580358e-03 0.000000000000000000e+00 1.264642944335940001e+03 1.366965293884280008e+00 1.000000000000000000e+00 2.253111114501949999e+02 -1.562500000000000000e+02 5.975000000000000000e+01
4.000000000000000000e+00 6.022923076923079861e+02 3.415584106445310226e+02 -2.978179931640620115e+00 9.999999776482580358e-03 0.000000000000000000e+00 1.230428100585940001e+03 1.362261414527889958e+00 1.000000000000000000e+00 1.801827392578119884e+02 -1.557500000000000000e+02 5.975000000000000000e+01
1.100000000000000000e+01 7.535384615384609788e+02 4.790878906250000000e+02 -2.291259765625000000e+00 0.000000000000000000e+00 0.000000000000000000e+00 1.039033935546880002e+03 1.339498639106750044e+00 1.000000000000000000e+00 5.349450683593750000e+02 -1.537500000000000000e+02 5.975000000000000000e+01
0.000000000000000000e+00 6.471769230769230035e+02 5.731270751953120453e+02 -2.771667480468750000e+00 2.702982127666470058e-01 0.000000000000000000e+00 9.286536254882810226e+02 1.590933799743649901e+00 1.000000000000000000e+00 1.019334533691410002e+03 -1.357500000000000000e+02 5.975000000000000000e+01
2.000000000000000000e+00 5.745923076923070312e+02 5.056601867675780113e+02 -3.066040039062500000e+00 1.965305060148239968e-01 0.000000000000000000e+00 9.201816406250000000e+02 1.203789591789250046e+00 1.000000000000000000e+00 1.190659179687500000e+03 -1.352500000000000000e+02 5.975000000000000000e+01
7.000000000000000000e+00 4.640846153846150060e+02 5.057530822753910229e+02 -3.390167236328120115e+00 2.637585401535029739e-01 0.000000000000000000e+00 9.057973632812500000e+02 1.022016882896420009e+00 1.000000000000000000e+00 1.345238769531250000e+03 -1.347500000000000000e+02 5.975000000000000000e+01
6.000000000000000000e+01 3.330923076923079975e+02 4.638371582031250000e+02 -4.097991943359380329e+00 9.999999776482580358e-03 0.000000000000000000e+00 8.652045288085939774e+02 7.419635653495789684e-01 4.000000000000000000e+00 7.893731079101560226e+02 -1.337500000000000000e+02 5.975000000000000000e+01
3.400000000000000000e+01 3.426230769230770079e+02 3.940972900390619884e+02 -4.451904296875000000e+00 3.487506508827210028e-01 5.714285714285709944e-02 8.449081420898439774e+02 9.942336678504940517e-01 3.000000000000000000e+00 1.194138061523440001e+03 -1.332500000000000000e+02 5.975000000000000000e+01
5.000000000000000000e+00 3.961846153846149718e+02 2.714375610351560226e+02 -5.852966308593750000e+00 3.990582823753360264e-01 6.470588445663449928e-01 7.849610595703120453e+02 5.949561595916750267e-01 1.000000000000000000e+00 1.174054199218750000e+03 -1.317500000000000000e+02 5.975000000000000000e+01
1.600000000000000000e+01 4.136076923076930143e+02 2.263249816894530113e+02 -6.330261230468750000e+00 4.545477032661440209e-01 5.882353186607359730e-01 7.650072631835939774e+02 9.465603232383730248e-01 1.000000000000000000e+00 1.399968261718750000e+03 -1.312500000000000000e+02 5.975000000000000000e+01
9.000000000000000000e+00 4.440615384615380208e+02 1.970726318359380116e+02 -6.509613037109380329e+00 3.722103834152220014e-01 5.882353186607359730e-01 7.848062744140620453e+02 1.074773788452149992e+00 1.000000000000000000e+00 1.313044067382809999e+03 -1.307500000000000000e+02 5.975000000000000000e+01
2.600000000000000000e+01 4.820076923076920252e+02 1.838570098876949999e+02 -6.688995361328119671e+00 5.777034163475039952e-01 2.352941185235979948e-01 8.046052856445310226e+02 9.353083372116089977e-01 3.000000000000000000e+00 1.184620117187500000e+03 -1.302500000000000000e+02 5.975000000000000000e+01
4.000000000000000000e+01 4.811692307692309782e+02 1.676094818115230112e+02 -6.992950439453119671e+00 2.316414117813110074e-01 8.235294222831730515e-01 8.440927734375000000e+02 1.625555157661439987e+00 3.000000000000000000e+00 8.184263916015620453e+02 -1.292500000000000000e+02 5.975000000000000000e+01
6.200000000000000000e+01 4.396153846153849827e+02 1.621161346435550001e+02 -6.953277587890619671e+00 3.406750857830049828e-01 8.235294222831730515e-01 8.634495849609379547e+02 1.679253816604610039e+00 4.000000000000000000e+00 9.697003173828120453e+02 -1.287500000000000000e+02 5.975000000000000000e+01
6.800000000000000000e+01 4.319769230769230148e+02 1.580616302490230112e+02 -6.913604736328119671e+00 1.943202614784239890e-01 2.941176593303679865e-01 8.828063964843750000e+02 1.718725085258479890e+00 4.000000000000000000e+00 7.569404907226560226e+02 -1.282500000000000000e+02 5.975000000000000000e+01
4.900000000000000000e+01 4.320153846153850168e+02 1.564353790283199999e+02 -6.873931884765619671e+00 2.505612969398500200e-01 2.352941185235979948e-01 9.021632080078120453e+02 9.145470261573790394e-01 4.000000000000000000e+00 8.741679077148439774e+02 -1.277500000000000000e+02 5.975000000000000000e+01
4.400000000000000000e+01 4.426076923076919911e+02 1.655668029785159945e+02 -6.686614990234380329e+00 1.220527961850170068e-01 1.117647051811220038e+00 9.385908203125000000e+02 7.180809974670410156e-01 3.000000000000000000e+00 7.404273071289060226e+02 -1.272500000000000000e+02 5.975000000000000000e+01
5.400000000000000000e+01 4.579615384615390212e+02 1.800220336914059942e+02 -6.351654052734380329e+00 1.255753934383390114e-01 1.352941155433649900e+00 9.920892333984379547e+02 1.466585993766780005e+00 4.000000000000000000e+00 8.153703002929689774e+02 -1.267500000000000000e+02 5.975000000000000000e+01
6.100000000000000000e+01 4.709230769230770193e+02 1.916608581542969887e+02 -6.016693115234380329e+00 3.470937311649319734e-01 2.857142857142859829e-02 1.045587646484380002e+03 1.136324167251590023e+00 4.000000000000000000e+00 1.150001586914059999e+03 -1.262500000000000000e+02 5.975000000000000000e+01
4.800000000000000000e+01 4.822615384615389758e+02 1.983026885986330115e+02 -5.681701660156250000e+00 4.128787517547610197e-01 1.142857142857140046e-01 1.099086059570309999e+03 6.622467041015619449e-01 4.000000000000000000e+00 1.243783325195309999e+03 -1.257500000000000000e+02 5.975000000000000000e+01
6.800000000000000000e+01 4.942307692307689990e+02 2.025946960449219887e+02 -5.270477294921880329e+00 2.147058695554729946e-01 2.857142857142859829e-02 1.187703613281250000e+03 9.871142506599429600e-01 4.000000000000000000e+00 1.054157348632809999e+03 -1.252500000000000000e+02 5.975000000000000000e+01
7.000000000000000000e+01 4.961769230769230035e+02 2.024164276123050001e+02 -4.833862304687500000e+00 9.999999776482580358e-03 1.176470592617989974e-01 1.288027587890619998e+03 7.439795732498170056e-01 4.000000000000000000e+00 6.162993774414060226e+02 -1.247500000000000000e+02 5.975000000000000000e+01
5.200000000000000000e+01 4.850769230769229807e+02 2.011849060058590055e+02 -4.397216796875000000e+00 9.999999776482580358e-03 2.941176593303679865e-01 1.388351440429690001e+03 7.738730311393740013e-01 4.000000000000000000e+00 4.536556396484380116e+02 -1.242500000000000000e+02 5.975000000000000000e+01
6.600000000000000000e+01 4.689384615384619792e+02 2.015814056396480112e+02 -3.960571289062500000e+00 9.999999776482580358e-03 4.117647111415860262e-01 1.488675292968750000e+03 7.913228869438170276e-01 4.000000000000000000e+00 4.411682739257810226e+02 -1.237500000000000000e+02 5.975000000000000000e+01
4.000000000000000000e+01 4.518076923076919797e+02 2.029719390869140057e+02 -3.683044433593750000e+00 9.999999776482580358e-03 2.941176593303679865e-01 1.566932739257809999e+03 7.837630510330200195e-01 3.000000000000000000e+00 4.697932739257810226e+02 -1.232500000000000000e+02 5.975000000000000000e+01
5.300000000000000000e+01 4.395384615384620020e+02 2.053661346435550001e+02 -3.405517578125000000e+00 1.042447090148929945e-01 3.529411852359770063e-01 1.645190063476559999e+03 7.765149474143979713e-01 4.000000000000000000e+00 5.128389892578120453e+02 -1.227500000000000000e+02 5.975000000000000000e+01
3.700000000000000000e+01 4.323153846153850282e+02 2.078352050781250000e+02 -3.128021240234379885e+00 1.006676554679870050e-01 2.857142857142859829e-02 1.723447509765619998e+03 7.706067562103270374e-01 3.000000000000000000e+00 4.992214050292969887e+02 -1.222500000000000000e+02 5.975000000000000000e+01
4.300000000000000000e+01 4.172384615384619906e+02 2.078807678222659945e+02 -2.905029296875000000e+00 9.999999776482580358e-03 8.571428571428570120e-02 1.794551879882809999e+03 9.980292916297910377e-01 3.000000000000000000e+00 4.579580383300780113e+02 -1.217500000000000000e+02 5.975000000000000000e+01
3.900000000000000000e+01 4.034692307692309896e+02 2.071923675537109943e+02 -2.845611572265620115e+00 1.092506870627400067e-01 5.714285714285709944e-02 1.844197021484380002e+03 1.881019353866580035e+00 3.000000000000000000e+00 4.687976379394530113e+02 -1.212500000000000000e+02 5.975000000000000000e+01
3.200000000000000000e+01 3.938307692307690218e+02 2.070323791503909945e+02 -2.786224365234379885e+00 1.222222670912739978e-01 7.058823704719540126e-01 1.893842163085940001e+03 1.874771833419800027e+00 3.000000000000000000e+00 4.868931579589839771e+02 -1.207500000000000000e+02 5.975000000000000000e+01
5.900000000000000000e+01 3.848076923076919797e+02 2.086374206542969887e+02 -2.726806640625000000e+00 1.210410371422769998e-01 7.647058963775630325e-01 1.943487304687500000e+03 1.333489894866940029e+00 4.000000000000000000e+00 4.676181030273439774e+02 -1.202500000000000000e+02 5.975000000000000000e+01
2.100000000000000000e+01 3.749307692307689877e+02 2.094855194091800001e+02 -2.753662109375000000e+00 2.020251899957659913e-01 8.823529481887819603e-01 1.975808837890619998e+03 1.817431330680850055e+00 3.000000000000000000e+00 5.606871948242189774e+02 -1.197500000000000000e+02 5.975000000000000000e+01
2.800000000000000000e+01 3.625076923076920252e+02 2.031631622314449999e+02 -3.093048095703120115e+00 3.375411033630369984e-01 4.117647111415860262e-01 2.020803222656250000e+03 1.735914587974549894e+00 3.000000000000000000e+00 7.350913085937500000e+02 -1.182500000000000000e+02 5.975000000000000000e+01
3.700000000000000000e+01 3.586615384615390099e+02 2.026952514648440058e+02 -3.208099365234379885e+00 3.330695927143100254e-01 2.941176593303679865e-01 2.023968017578119998e+03 1.385312557220460095e+00 3.000000000000000000e+00 6.486932373046879547e+02 -1.177500000000000000e+02 5.975000000000000000e+01
3.000000000000000000e+01 3.358076923076919797e+02 2.033396453857419885e+02 -3.323791503906250000e+00 1.445514410734179966e-01 5.294117927551269531e-01 2.023188354492190001e+03 8.174466490745539993e-01 3.000000000000000000e+00 3.177405395507810226e+02 -1.172500000000000000e+02 5.975000000000000000e+01
3.000000000000000000e+01 3.420769230769229807e+02 2.043097381591800001e+02 -3.439483642578120115e+00 1.538262218236919887e-01 5.882353186607359730e-01 2.022408813476559999e+03 9.498770833015439674e-01 3.000000000000000000e+00 3.137530517578119884e+02 -1.167500000000000000e+02 5.975000000000000000e+01
2.100000000000000000e+01 3.517615384615380094e+02 2.069342651367190058e+02 -3.555175781250000000e+00 1.820138394832609974e-01 7.647058963775630325e-01 2.021629272460940001e+03 8.052815794944759853e-01 3.000000000000000000e+00 3.553248901367189774e+02 -1.162500000000000000e+02 5.975000000000000000e+01
2.900000000000000000e+01 3.582461538461540158e+02 2.073571319580080115e+02 -3.647064208984379885e+00 2.042790055274960048e-01 2.857142857142859760e-01 2.004958007812500000e+03 1.045534253120419921e+00 3.000000000000000000e+00 3.750621948242189774e+02 -1.157500000000000000e+02 5.975000000000000000e+01
4.900000000000000000e+01 3.628999999999999773e+02 2.050960083007809942e+02 -3.738983154296879885e+00 2.234824597835539939e-01 3.428571428571430268e-01 1.988286865234380002e+03 7.263798713684079811e-01 4.000000000000000000e+00 4.195102233886719887e+02 -1.152500000000000000e+02 5.975000000000000000e+01
5.500000000000000000e+01 3.546307692307689763e+02 2.008279724121090055e+02 -3.830871582031250000e+00 2.184340357780459874e-01 2.571428571428570065e-01 1.971615600585940001e+03 7.289935350418089710e-01 4.000000000000000000e+00 3.848969421386719887e+02 -1.147500000000000000e+02 5.975000000000000000e+01
4.100000000000000000e+01 3.440461538461540272e+02 1.812930450439449999e+02 -3.964996337890620115e+00 2.012936472892760120e-01 1.235294103622440076e+00 1.937558227539059999e+03 7.522511482238769531e-01 3.000000000000000000e+00 3.154795227050780113e+02 -1.137500000000000000e+02 5.975000000000000000e+01
2.000000000000000000e+01 3.516615384615379867e+02 1.763384704589840055e+02 -4.017181396484380329e+00 1.957515031099320013e-01 4.705882370471949905e-01 1.920315063476559999e+03 7.552937269210819871e-01 3.000000000000000000e+00 2.780803833007810226e+02 -1.132500000000000000e+02 5.975000000000000000e+01
2.200000000000000000e+01 3.555076923076920252e+02 1.750257873535159945e+02 -4.069366455078119671e+00 1.966142505407330043e-01 5.294117927551269531e-01 1.903071899414059999e+03 7.614371180534359462e-01 3.000000000000000000e+00 2.621875305175780113e+02 -1.127500000000000000e+02 5.975000000000000000e+01
6.100000000000000000e+01 3.580230769230769852e+02 1.758305664062500000e+02 -4.106353759765619671e+00 1.989638805389400134e-01 9.411764740943909802e-01 1.882854614257809999e+03 7.666464447975159802e-01 4.000000000000000000e+00 2.617235107421880116e+02 -1.122500000000000000e+02 5.975000000000000000e+01
3.400000000000000000e+01 3.629769230769230148e+02 1.767834777832030113e+02 -4.128204345703119671e+00 1.941994726657869930e-01 8.823529481887819603e-01 1.859663452148440001e+03 7.683582901954649769e-01 3.000000000000000000e+00 2.211572875976559942e+02 -1.117500000000000000e+02 5.975000000000000000e+01
3.200000000000000000e+01 3.578384615384620133e+02 1.766924743652340055e+02 -4.150054931640619671e+00 2.096556276082990056e-01 1.428571428571429880e-01 1.836472167968750000e+03 7.614876031875610352e-01 3.000000000000000000e+00 2.521405944824219887e+02 -1.112500000000000000e+02 5.975000000000000000e+01
2.700000000000000000e+01 3.618000000000000114e+02 1.765777282714840055e+02 -4.171905517578119671e+00 2.580102682113650236e-01 2.941176593303679865e-01 1.813280883789059999e+03 1.813094615936279963e+00 3.000000000000000000e+00 2.962727966308589771e+02 -1.107500000000000000e+02 5.975000000000000000e+01
3.800000000000000000e+01 3.608615384615379753e+02 1.767830047607419885e+02 -4.252288818359380329e+00 2.976856231689449794e-01 5.882353186607359730e-01 1.785111816406250000e+03 1.789754152297970080e+00 3.000000000000000000e+00 3.454747924804689774e+02 -1.102500000000000000e+02 5.975000000000000000e+01
2.300000000000000000e+01 3.616000000000000227e+02 2.073857421875000000e+02 -4.757446289062500000e+00 4.079051315784449905e-01 6.470588445663449928e-01 1.658358642578119998e+03 1.312538146972660025e+00 3.000000000000000000e+00 4.313299865722660229e+02 -1.082500000000000000e+02 5.975000000000000000e+01
3.100000000000000000e+01 3.673846153846150173e+02 2.178907470703119884e+02 -4.962921142578119671e+00 4.506655335426330011e-01 6.470588445663449928e-01 1.621090454101559999e+03 1.049755573272709963e+00 3.000000000000000000e+00 4.327191772460939774e+02 -1.077500000000000000e+02 5.975000000000000000e+01
3.400000000000000000e+01 3.787384615384619906e+02 2.279303588867190058e+02 -5.168395996093750000e+00 4.850573539733890049e-01 1.000000000000000000e+00 1.583822143554690001e+03 1.380866527557369938e+00 3.000000000000000000e+00 4.359270629882810226e+02 -1.072500000000000000e+02 5.975000000000000000e+01
4.000000000000000000e+01 3.821461538461539931e+02 2.350988922119140057e+02 -5.388397216796880329e+00 5.037751197814940296e-01 3.714285714285709972e-01 1.547670166015619998e+03 1.693778991699220082e+00 3.000000000000000000e+00 4.499897155761719887e+02 -1.067500000000000000e+02 5.975000000000000000e+01
3.400000000000000000e+01 3.964615384615379980e+02 2.426032867431640057e+02 -5.915405273437500000e+00 6.169965863227839797e-01 9.411764740943909802e-01 1.482063110351559999e+03 1.311870813369750088e+00 3.000000000000000000e+00 4.659799804687500000e+02 -1.057500000000000000e+02 5.975000000000000000e+01
3.600000000000000000e+01 4.040076923076920252e+02 2.450157928466800001e+02 -6.178894042968750000e+00 6.563085317611689895e-01 5.882353186607359730e-01 1.449259521484380002e+03 7.682874798774720349e-01 3.000000000000000000e+00 4.768900146484380116e+02 -1.052500000000000000e+02 5.975000000000000000e+01
2.900000000000000000e+01 4.093769230769229921e+02 2.514351654052730112e+02 -6.449829101562500000e+00 6.795511841773990147e-01 6.470588445663449928e-01 1.419990112304690001e+03 1.405444502830510034e+00 3.000000000000000000e+00 4.242952575683589771e+02 -1.047500000000000000e+02 5.975000000000000000e+01
1.400000000000000000e+01 4.174384615384619792e+02 2.597075195312500000e+02 -6.728210449218750000e+00 6.693766713142399460e-01 5.294117927551269531e-01 1.394254638671880002e+03 6.564387679100039952e-01 1.000000000000000000e+00 3.977981872558589771e+02 -1.042500000000000000e+02 5.975000000000000000e+01
3.800000000000000000e+01 4.185923076923079975e+02 2.696620788574219887e+02 -7.006591796875000000e+00 7.079144120216369629e-01 2.857142857142859760e-01 1.368519165039059999e+03 6.487171053886410244e-01 3.000000000000000000e+00 4.234462890625000000e+02 -1.037500000000000000e+02 5.975000000000000000e+01
2.300000000000000000e+01 4.157538461538459842e+02 2.772089233398439774e+02 -7.284973144531250000e+00 7.429201006889339931e-01 6.470588445663449928e-01 1.342783691406250000e+03 6.432303190231319912e-01 3.000000000000000000e+00 4.347746276855469887e+02 -1.032500000000000000e+02 5.975000000000000000e+01
1.900000000000000000e+01 4.051846153846149718e+02 2.830945129394530113e+02 -7.515930175781250000e+00 7.704131603240970128e-01 8.571428571428570120e-02 1.324103149414059999e+03 6.371616125106810413e-01 1.000000000000000000e+00 4.114576416015619884e+02 -1.027500000000000000e+02 5.975000000000000000e+01
3.000000000000000000e+01 3.960692307692310123e+02 2.838427429199219887e+02 -7.731079101562500000e+00 7.894581556320190430e-01 5.714285714285709944e-02 1.307774169921880002e+03 6.310902833938599743e-01 3.000000000000000000e+00 3.956620483398439774e+02 -1.022500000000000000e+02 5.975000000000000000e+01
1.800000000000000000e+01 3.937923076923079861e+02 2.795530090332030113e+02 -7.946228027343750000e+00 8.359684944152829811e-01 2.941176593303679865e-01 1.291445190429690001e+03 6.241801977157590553e-01 1.000000000000000000e+00 4.226298217773439774e+02 -1.017500000000000000e+02 5.975000000000000000e+01
1.900000000000000000e+01 3.885153846153850168e+02 2.725085449218750000e+02 -8.161376953125000000e+00 8.339108824729920544e-01 0.000000000000000000e+00 1.275116210937500000e+03 6.457061767578119449e-01 1.000000000000000000e+00 3.512921142578119884e+02 -1.012500000000000000e+02 5.975000000000000000e+01
2.100000000000000000e+01 3.791307692307689763e+02 2.647839660644530113e+02 -8.252655029296880329e+00 8.490469455718989700e-01 5.882353186607359730e-01 1.264364501953119998e+03 6.712528467178340286e-01 3.000000000000000000e+00 3.417248229980469887e+02 -1.007500000000000000e+02 5.975000000000000000e+01
1.500000000000000000e+01 3.714153846153849940e+02 2.579224853515619884e+02 -8.343933105468750000e+00 8.380729556083680309e-01 1.142857142857140046e-01 1.253612792968750000e+03 1.011105298995969903e+00 1.000000000000000000e+00 2.944928283691410229e+02 -1.002500000000000000e+02 5.975000000000000000e+01
1.700000000000000000e+01 5.806076923076919911e+02 2.796567687988280113e+02 -1.259277343750000000e+00 9.999999776482580358e-03 0.000000000000000000e+00 1.372525512695309999e+03 1.336442947387699975e+00 1.000000000000000000e+00 5.284462451934810012e+00 -1.627500000000000000e+02 6.025000000000000000e+01
7.000000000000000000e+00 5.652692307692309441e+02 2.785454406738280113e+02 -1.876281738281250000e+00 9.999999776482580358e-03 0.000000000000000000e+00 1.410689819335940001e+03 1.380534052848819915e+00 1.000000000000000000e+00 1.261412811279300072e+01 -1.617500000000000000e+02 6.025000000000000000e+01
6.000000000000000000e+00 5.538692307692309669e+02 2.733070068359380116e+02 -2.184753417968750000e+00 9.999999776482580358e-03 0.000000000000000000e+00 1.429771972656250000e+03 1.352609395980830076e+00 1.000000000000000000e+00 5.717155075073240056e+01 -1.612500000000000000e+02 6.025000000000000000e+01
7.000000000000000000e+00 5.366615384615380435e+02 2.650729980468750000e+02 -2.524963378906250000e+00 1.193338781595229964e-01 0.000000000000000000e+00 1.369705444335940001e+03 1.288508057594299983e+00 1.000000000000000000e+00 2.484828491210940058e+02 -1.607500000000000000e+02 6.025000000000000000e+01
1.000000000000000000e+01 5.105000000000000000e+02 2.567614440917969887e+02 -2.865142822265620115e+00 1.241904869675640039e-01 0.000000000000000000e+00 1.309638916015619998e+03 1.114643335342409891e+00 1.000000000000000000e+00 2.905106506347660229e+02 -1.602500000000000000e+02 6.025000000000000000e+01
5.000000000000000000e+00 4.986615384615390099e+02 2.513402709960940058e+02 -3.205352783203120115e+00 3.330771327018740013e-01 0.000000000000000000e+00 1.249572509765619998e+03 1.170221328735350008e+00 1.000000000000000000e+00 7.338483886718750000e+02 -1.597500000000000000e+02 6.025000000000000000e+01
1.900000000000000000e+01 4.810538461538459956e+02 2.471900177001949999e+02 -3.477325439453120115e+00 3.036370277404790152e-01 0.000000000000000000e+00 1.212755004882809999e+03 1.188868165016170098e+00 1.000000000000000000e+00 7.551801757812500000e+02 -1.592500000000000000e+02 6.025000000000000000e+01
1.000000000000000000e+01 5.016999999999999886e+02 2.442859802246090055e+02 -3.544647216796879885e+00 1.050277054309839975e-01 0.000000000000000000e+00 1.245684692382809999e+03 1.397926688194270017e+00 1.000000000000000000e+00 2.245986938476559942e+02 -1.587500000000000000e+02 6.025000000000000000e+01
7.000000000000000000e+00 4.930461538461540272e+02 2.420516967773440058e+02 -3.611938476562500000e+00 1.336445212364200108e-01 0.000000000000000000e+00 1.278614379882809999e+03 2.266260385513310105e+00 1.000000000000000000e+00 2.810821838378910229e+02 -1.582500000000000000e+02 6.025000000000000000e+01
6.000000000000000000e+00 4.929923076923070084e+02 2.461421661376949999e+02 -3.679260253906250000e+00 1.235882267355919995e-01 0.000000000000000000e+00 1.311544189453119998e+03 1.891138434410100100e+00 1.000000000000000000e+00 3.846533813476560226e+02 -1.577500000000000000e+02 6.025000000000000000e+01
7.000000000000000000e+00 5.025076923076920252e+02 2.567321166992189774e+02 -3.713531494140620115e+00 9.999999776482580358e-03 0.000000000000000000e+00 1.314359985351559999e+03 1.361187815666200063e+00 1.000000000000000000e+00 1.896307220458980112e+02 -1.572500000000000000e+02 6.025000000000000000e+01
7.000000000000000000e+00 5.109461538461540044e+02 2.772012329101560226e+02 -3.714752197265620115e+00 1.164474636316299994e-01 0.000000000000000000e+00 1.287061767578119998e+03 1.362630009651180085e+00 1.000000000000000000e+00 2.881431884765619884e+02 -1.567500000000000000e+02 6.025000000000000000e+01
4.000000000000000000e+00 5.304615384615390212e+02 2.890059509277339771e+02 -3.716003417968750000e+00 9.999999776482580358e-03 0.000000000000000000e+00 1.259763671875000000e+03 1.366875290870670057e+00 1.000000000000000000e+00 1.858652954101559942e+02 -1.562500000000000000e+02 6.025000000000000000e+01
7.000000000000000000e+00 5.733461538461540385e+02 2.932834777832030113e+02 -3.717224121093750000e+00 9.999999776482580358e-03 0.000000000000000000e+00 1.232465454101559999e+03 1.367269754409790039e+00 1.000000000000000000e+00 2.740350952148439774e+02 -1.557500000000000000e+02 6.025000000000000000e+01
2.100000000000000000e+01 6.098461538461540385e+02 2.944490051269530113e+02 -3.666717529296879885e+00 9.999999776482580358e-03 0.000000000000000000e+00 1.164655761718750000e+03 1.448526501655579946e+00 3.000000000000000000e+00 3.571293334960939774e+02 -1.552500000000000000e+02 6.025000000000000000e+01
4.300000000000000000e+01 6.475461538461539703e+02 2.905782470703119884e+02 -3.598968505859379885e+00 0.000000000000000000e+00 0.000000000000000000e+00 1.083342407226559999e+03 1.426036357879640004e+00 3.000000000000000000e+00 2.562576904296880116e+02 -1.547500000000000000e+02 6.025000000000000000e+01
2.500000000000000000e+01 6.607923076923079861e+02 3.387477416992189774e+02 -3.463470458984379885e+00 3.769313395023349833e-01 0.000000000000000000e+00 9.207153930664060226e+02 1.206773400306700106e+00 3.000000000000000000e+00 6.830780029296879547e+02 -1.537500000000000000e+02 6.025000000000000000e+01
4.900000000000000000e+01 5.870769230769229807e+02 4.096214599609380116e+02 -1.945190429687500000e-01 0.000000000000000000e+00 2.941176593303679865e-01 1.133518676757809999e+03 1.298679947853089933e+00 4.000000000000000000e+00 2.828878784179689774e+02 -1.507500000000000000e+02 6.025000000000000000e+01
1.700000000000000000e+01 6.225769230769229807e+02 5.278691406250000000e+02 -3.635559082031250000e-01 1.708326488733289961e-01 6.470588445663449928e-01 1.076895629882809999e+03 1.410506725311279963e+00 1.000000000000000000e+00 9.225313720703120453e+02 -1.502500000000000000e+02 6.025000000000000000e+01
6.600000000000000000e+01 6.803923076923069857e+02 6.017977905273439774e+02 -6.750488281250000000e-02 0.000000000000000000e+00 0.000000000000000000e+00 1.116268920898440001e+03 1.796730518341060012e+00 4.000000000000000000e+00 6.563765258789060226e+02 -1.497500000000000000e+02 6.025000000000000000e+01
1.200000000000000000e+01 7.442769230769230262e+02 6.219146728515620453e+02 6.936340332031250000e-01 1.539002507925029961e-01 0.000000000000000000e+00 1.251638671875000000e+03 1.254662752151489924e+00 1.000000000000000000e+00 7.455222167968750000e+02 -1.492500000000000000e+02 6.025000000000000000e+01
2.000000000000000000e+00 5.890076923076929916e+02 6.033205566406250000e+02 -3.748382568359379885e+00 6.380894184112549938e-01 0.000000000000000000e+00 6.460024414062500000e+02 9.600602984428410203e-01 1.000000000000000000e+00 1.333008544921880002e+03 -1.377500000000000000e+02 6.025000000000000000e+01
1.600000000000000000e+01 5.281307692307700563e+02 5.495421142578120453e+02 -3.660827636718750000e+00 2.228131294250489947e-01 0.000000000000000000e+00 7.412103881835939774e+02 1.003955602645870027e+00 1.000000000000000000e+00 9.957880249023439774e+02 -1.372500000000000000e+02 6.025000000000000000e+01
4.000000000000000000e+00 5.058923076923080089e+02 5.328847045898439774e+02 -3.642913818359379885e+00 6.182268261909480422e-01 0.000000000000000000e+00 8.152344970703120453e+02 1.036556601524349919e+00 1.000000000000000000e+00 1.504155273437500000e+03 -1.367500000000000000e+02 6.025000000000000000e+01
1.000000000000000000e+01 4.437615384615380094e+02 4.745620727539060226e+02 -4.025146484375000000e+00 4.778508543968200128e-01 7.647058963775630325e-01 8.361802978515620453e+02 1.106151700019839978e+00 1.000000000000000000e+00 1.494285766601559999e+03 -1.357500000000000000e+02 6.025000000000000000e+01
4.000000000000000000e+00 3.718000000000000114e+02 4.163562622070310226e+02 -4.216247558593750000e+00 4.594671130180359997e-01 0.000000000000000000e+00 8.466531982421879547e+02 9.767361283302310460e-01 1.000000000000000000e+00 1.228341796875000000e+03 -1.352500000000000000e+02 6.025000000000000000e+01
5.200000000000000000e+01 2.809846153846149832e+02 3.543458251953119884e+02 -4.687438964843750000e+00 9.999999776482580358e-03 2.857142857142859829e-02 8.630759887695310226e+02 1.099876642227169965e+00 4.000000000000000000e+00 7.467205200195310226e+02 -1.342500000000000000e+02 6.025000000000000000e+01
3.200000000000000000e+01 2.697846153846149946e+02 2.938409118652339771e+02 -4.937866210937500000e+00 2.156937420368189862e-01 0.000000000000000000e+00 8.705335693359379547e+02 6.900982260704040527e-01 3.000000000000000000e+00 1.015509155273440001e+03 -1.337500000000000000e+02 6.025000000000000000e+01
3.700000000000000000e+01 2.934615384615379980e+02 2.269622039794919885e+02 -5.188293457031250000e+00 5.032448172569270461e-01 8.571428571428570120e-02 8.779911499023439774e+02 6.740775704383850098e-01 3.000000000000000000e+00 1.203092529296880002e+03 -1.332500000000000000e+02 6.025000000000000000e+01
6.700000000000000000e+01 3.219923076923079748e+02 1.923164367675780113e+02 -5.584838867187500000e+00 4.764562547206879772e-01 0.000000000000000000e+00 8.552332153320310226e+02 1.074521780014040084e+00 4.000000000000000000e+00 1.121114624023440001e+03 -1.327500000000000000e+02 6.025000000000000000e+01
6.200000000000000000e+01 3.349461538461540044e+02 1.881395874023440058e+02 -6.030120849609380329e+00 2.996486425399780273e-01 0.000000000000000000e+00 8.224033813476560226e+02 6.291581988334660203e-01 4.000000000000000000e+00 1.110273071289059999e+03 -1.322500000000000000e+02 6.025000000000000000e+01
5.600000000000000000e+01 3.524846153846149832e+02 1.809016265869140057e+02 -6.475402832031250000e+00 4.366289079189299982e-01 2.857142857142859829e-02 7.895735473632810226e+02 6.252880692481990188e-01 4.000000000000000000e+00 1.272770019531250000e+03 -1.317500000000000000e+02 6.025000000000000000e+01
7.000000000000000000e+00 4.163384615384620133e+02 1.360330810546880116e+02 -7.038208007812500000e+00 6.398380994796749599e-01 5.714285714285709944e-02 7.803754882812500000e+02 6.787968277931210048e-01 1.000000000000000000e+00 1.513310180664059999e+03 -1.307500000000000000e+02 6.025000000000000000e+01
6.000000000000000000e+01 4.545153846153839936e+02 1.299301910400390057e+02 -7.155761718750000000e+00 4.393430948257450175e-01 0.000000000000000000e+00 8.040072631835939774e+02 1.001987218856809969e+00 4.000000000000000000e+00 1.126085815429690001e+03 -1.302500000000000000e+02 6.025000000000000000e+01
6.900000000000000000e+01 4.719923076923070084e+02 1.307267761230469887e+02 -7.273284912109380329e+00 1.510130316019059893e-01 2.352941185235979948e-01 8.276389770507810226e+02 1.618032693862919924e+00 4.000000000000000000e+00 7.496145019531250000e+02 -1.297500000000000000e+02 6.025000000000000000e+01
2.800000000000000000e+01 4.531230769230770079e+02 1.319774017333980112e+02 -7.336700439453119671e+00 1.481477618217469927e-01 5.294117927551269531e-01 8.514782104492189774e+02 1.679692029953000043e+00 3.000000000000000000e+00 6.546750488281250000e+02 -1.292500000000000000e+02 6.025000000000000000e+01
6.900000000000000000e+01 4.338307692307690218e+02 1.349095458984380116e+02 -7.237701416015619671e+00 2.719947695732120030e-01 2.941176593303679865e-01 8.759399414062500000e+02 1.615113019943239969e+00 4.000000000000000000e+00 9.507538452148439774e+02 -1.287500000000000000e+02 6.025000000000000000e+01
4.700000000000000000e+01 4.449692307692309896e+02 1.371544494628909945e+02 -7.138702392578119671e+00 1.198071837425229991e-01 5.882353186607359730e-01 9.004016723632810226e+02 1.574404954910280097e+00 4.000000000000000000e+00 6.550509033203120453e+02 -1.282500000000000000e+02 6.025000000000000000e+01
3.600000000000000000e+01 4.520153846153850168e+02 1.421320343017580115e+02 -7.039703369140619671e+00 2.563395202159879926e-01 5.714285714285709944e-02 9.248634033203120453e+02 8.492873907089230068e-01 3.000000000000000000e+00 1.024045043945309999e+03 -1.277500000000000000e+02 6.025000000000000000e+01
7.300000000000000000e+01 4.589384615384610129e+02 1.516148376464840055e+02 -6.805541992187500000e+00 3.399499952793120228e-01 2.941176593303679865e-01 9.678397827148439774e+02 1.511454463005069915e+00 4.000000000000000000e+00 1.083693481445309999e+03 -1.272500000000000000e+02 6.025000000000000000e+01
3.100000000000000000e+01 4.627846153846160178e+02 1.671158599853519888e+02 -6.436218261718750000e+00 2.082384079694749868e-01 6.470588445663449928e-01 1.029330810546880002e+03 1.643051862716669920e+00 3.000000000000000000e+00 9.014443359375000000e+02 -1.267500000000000000e+02 6.025000000000000000e+01
7.200000000000000000e+01 4.701384615384620247e+02 1.782230224609380116e+02 -6.066894531250000000e+00 2.511165440082550049e-01 5.882353186607359730e-01 1.090821777343750000e+03 1.457591056823730025e+00 4.000000000000000000e+00 8.720518798828120453e+02 -1.262500000000000000e+02 6.025000000000000000e+01
5.000000000000000000e+01 4.796000000000000227e+02 1.878860473632809942e+02 -5.697540283203119671e+00 2.655935287475589823e-01 1.176470637321469948e+00 1.152312744140619998e+03 7.691178321838380016e-01 4.000000000000000000e+00 9.840175170898439774e+02 -1.257500000000000000e+02 6.025000000000000000e+01
6.100000000000000000e+01 4.845230769230769852e+02 1.933146362304690058e+02 -5.299743652343750000e+00 9.999999776482580358e-03 2.285714285714290084e-01 1.235757446289059999e+03 1.356623768806459962e+00 4.000000000000000000e+00 6.037435302734379547e+02 -1.252500000000000000e+02 6.025000000000000000e+01
7.100000000000000000e+01 4.853846153846150173e+02 1.984050445556640057e+02 -4.892425537109380329e+00 3.093101382255549758e-01 2.941176593303679865e-01 1.326519897460940001e+03 9.790753126144410290e-01 4.000000000000000000e+00 9.801767578125000000e+02 -1.247500000000000000e+02 6.025000000000000000e+01
6.900000000000000000e+01 4.809923076923079748e+02 1.952597198486330115e+02 -4.485137939453119671e+00 9.999999776482580358e-03 1.428571428571429880e-01 1.417282470703119998e+03 7.150724530220029518e-01 4.000000000000000000e+00 6.688032226562500000e+02 -1.242500000000000000e+02 6.025000000000000000e+01
6.600000000000000000e+01 4.620230769230769852e+02 1.913872375488280113e+02 -4.077819824218750000e+00 9.999999776482580358e-03 5.882352963089940157e-02 1.508044921875000000e+03 7.619701623916630417e-01 4.000000000000000000e+00 3.639948120117189774e+02 -1.237500000000000000e+02 6.025000000000000000e+01
5.800000000000000000e+01 4.507461538461540158e+02 1.904681243896480112e+02 -3.833068847656250000e+00 9.999999776482580358e-03 0.000000000000000000e+00 1.581320678710940001e+03 7.839114665985109642e-01 4.000000000000000000e+00 3.034084777832030113e+02 -1.232500000000000000e+02 6.025000000000000000e+01
5.400000000000000000e+01 4.428538461538460069e+02 1.898816070556640057e+02 -3.588317871093750000e+00 9.999999776482580358e-03 0.000000000000000000e+00 1.654596313476559999e+03 8.908042311668400437e-01 4.000000000000000000e+00 3.313972167968750000e+02 -1.227500000000000000e+02 6.025000000000000000e+01
5.200000000000000000e+01 4.322076923076920139e+02 1.902206878662109943e+02 -3.343566894531250000e+00 1.344215869903560012e-01 2.857142857142859829e-02 1.727872070312500000e+03 1.419375538825990102e+00 4.000000000000000000e+00 4.414453735351560226e+02 -1.222500000000000000e+02 6.025000000000000000e+01
4.100000000000000000e+01 4.173076923076919797e+02 1.891906738281250000e+02 -3.153503417968750000e+00 1.433850377798079889e-01 5.294117927551269531e-01 1.793745483398440001e+03 1.492850542068479891e+00 3.000000000000000000e+00 4.683811950683589771e+02 -1.217500000000000000e+02 6.025000000000000000e+01
4.600000000000000000e+01 4.000692307692310123e+02 1.868583526611330115e+02 -3.127502441406250000e+00 2.695992887020109974e-01 1.714285714285710138e-01 1.837411987304690001e+03 1.487454533576969995e+00 4.000000000000000000e+00 6.491655883789060226e+02 -1.212500000000000000e+02 6.025000000000000000e+01
5.000000000000000000e+01 3.832923076923079861e+02 1.851810150146480112e+02 -3.101501464843750000e+00 2.452452182769780109e-01 5.882353186607359730e-01 1.881078491210940001e+03 1.803399324417110039e+00 4.000000000000000000e+00 6.103500976562500000e+02 -1.207500000000000000e+02 6.025000000000000000e+01
4.300000000000000000e+01 3.743538461538460069e+02 1.848955993652340055e+02 -3.075469970703120115e+00 3.164178431034089800e-01 7.058823704719540126e-01 1.924744995117190001e+03 1.806381821632389917e+00 3.000000000000000000e+00 6.796063232421879547e+02 -1.202500000000000000e+02 6.025000000000000000e+01
3.700000000000000000e+01 3.648000000000000114e+02 1.830907745361330115e+02 -3.124542236328120115e+00 1.642035990953449875e-01 7.647058963775630325e-01 1.952507324218750000e+03 1.546400666236880106e+00 3.000000000000000000e+00 4.224595031738280113e+02 -1.197500000000000000e+02 6.025000000000000000e+01
5.900000000000000000e+01 3.523923076923069857e+02 1.784710083007809942e+02 -3.248657226562500000e+00 2.152718901634219917e-01 4.000000000000000222e-01 1.964365722656250000e+03 7.358113527297970302e-01 4.000000000000000000e+00 4.904448852539060226e+02 -1.192500000000000000e+02 6.025000000000000000e+01
6.100000000000000000e+01 3.477076923076920139e+02 1.822230377197269888e+02 -3.372772216796879885e+00 2.384480088949199883e-01 1.714285714285710138e-01 1.976224121093750000e+03 1.059501886367800072e+00 4.000000000000000000e+00 4.916633911132810226e+02 -1.187500000000000000e+02 6.025000000000000000e+01
5.100000000000000000e+01 3.441307692307689763e+02 1.885498504638669885e+02 -3.496917724609379885e+00 2.328529357910160136e-01 1.714285714285710138e-01 1.988082397460940001e+03 7.378559112548830345e-01 4.000000000000000000e+00 4.433402404785160229e+02 -1.182500000000000000e+02 6.025000000000000000e+01
6.200000000000000000e+01 3.353538461538460069e+02 1.963191528320309942e+02 -3.618988037109379885e+00 3.838548958301539749e-01 2.941176593303679865e-01 1.988067382812500000e+03 1.230029344558720039e+00 4.000000000000000000e+00 6.095350952148439774e+02 -1.177500000000000000e+02 6.025000000000000000e+01
4.200000000000000000e+01 3.316307692307689763e+02 2.045082092285159945e+02 -3.740386962890620115e+00 5.203588008880619675e-01 5.714285714285709944e-02 1.984094482421880002e+03 1.782680034637450062e+00 3.000000000000000000e+00 7.841138916015620453e+02 -1.172500000000000000e+02 6.025000000000000000e+01
1.400000000000000000e+01 3.331999999999999886e+02 2.124376373291019888e+02 -3.861785888671879885e+00 1.919039636850360109e-01 3.714285714285709972e-01 1.980121704101559999e+03 1.834380507469179911e+00 1.000000000000000000e+00 2.521477355957030113e+02 -1.167500000000000000e+02 6.025000000000000000e+01
[truncated: 533,937 more chars]
