# Supplementary material for: Environmental Conditions for Alternative Tree Cover States in HighLatitudes
Source: Copernicus journal article supplement (doi:10.5194/bg-2016-401), 2016-10-11
Supplement: Supplementary file 4 [file bg-2016-401-supplement.zip › Analysis/files_to_load_and_import/boreal_nea_database.txt]

4.100000000000000000e+01 8.085076923076927642e+02 3.972275390625000000e+02 9.718048095703125000e+00 0.000000000000000000e+00 0.000000000000000000e+00 4.286991699218750000e+03 4.497154712677001953e+00 3.000000000000000000e+00 1.773536224365234375e+02 7.500000000000000000e-01 4.525000000000000000e+01
1.600000000000000000e+01 8.187153846153840959e+02 3.733013610839843750e+02 9.426177978515625000e+00 0.000000000000000000e+00 0.000000000000000000e+00 4.245008789062500000e+03 4.425670146942138672e+00 3.000000000000000000e+00 2.461878662109375000e+02 1.250000000000000000e+00 4.525000000000000000e+01
2.300000000000000000e+01 8.249384615384608423e+02 3.970316772460937500e+02 9.134277343750000000e+00 0.000000000000000000e+00 0.000000000000000000e+00 4.204960449218750000e+03 4.307260036468505859e+00 3.000000000000000000e+00 2.967704162597656250e+02 1.750000000000000000e+00 4.525000000000000000e+01
5.500000000000000000e+01 9.115769230769233218e+02 4.992887573242187500e+02 8.840179443359375000e+00 0.000000000000000000e+00 0.000000000000000000e+00 3.859728027343750000e+03 4.028706073760986328e+00 4.000000000000000000e+00 5.175339355468750000e+02 2.250000000000000000e+00 4.525000000000000000e+01
2.700000000000000000e+01 1.069176923076923231e+03 4.872359619140625000e+02 8.545318603515625000e+00 0.000000000000000000e+00 0.000000000000000000e+00 3.819034179687500000e+03 3.790394306182861328e+00 3.000000000000000000e+00 1.009686889648437500e+03 2.750000000000000000e+00 4.525000000000000000e+01
5.400000000000000000e+01 9.443461538461541522e+02 3.794763793945312500e+02 8.250488281250000000e+00 0.000000000000000000e+00 0.000000000000000000e+00 3.777315429687500000e+03 3.917415857315063477e+00 4.000000000000000000e+00 7.775584716796875000e+02 3.250000000000000000e+00 4.525000000000000000e+01
5.300000000000000000e+01 1.000315384615385028e+03 3.097533569335937500e+02 7.955627441406250000e+00 0.000000000000000000e+00 0.000000000000000000e+00 3.736678955078125000e+03 3.896582841873168945e+00 4.000000000000000000e+00 1.023340087890625000e+03 3.750000000000000000e+00 4.525000000000000000e+01
2.800000000000000000e+01 9.128153846153842323e+02 4.272550048828125000e+02 7.203826904296875000e+00 0.000000000000000000e+00 2.941176593303680420e-01 3.277147705078125000e+03 4.258574962615966797e+00 3.000000000000000000e+00 6.167466430664062500e+02 5.250000000000000000e+00 4.525000000000000000e+01
7.200000000000000000e+01 9.126538461538459615e+02 4.486409912109375000e+02 6.894958496093750000e+00 0.000000000000000000e+00 0.000000000000000000e+00 2.850759765625000000e+03 3.434830427169799805e+00 4.000000000000000000e+00 9.462054443359375000e+02 5.750000000000000000e+00 4.525000000000000000e+01
2.700000000000000000e+01 1.313138461538461570e+03 3.765302734375000000e+02 6.411254882812500000e+00 0.000000000000000000e+00 0.000000000000000000e+00 2.792958251953125000e+03 1.868884444236755371e+00 3.000000000000000000e+00 1.689429199218750000e+03 6.250000000000000000e+00 4.525000000000000000e+01
1.200000000000000000e+01 1.431023076923076360e+03 2.791053466796875000e+02 5.443878173828125000e+00 0.000000000000000000e+00 0.000000000000000000e+00 2.670464843750000000e+03 2.401699304580688477e+00 3.000000000000000000e+00 1.678810058593750000e+03 7.250000000000000000e+00 4.525000000000000000e+01
3.000000000000000000e+00 6.638384615384618428e+02 3.446415405273437500e+02 5.915496826171875000e+00 0.000000000000000000e+00 0.000000000000000000e+00 2.057722412109375000e+03 4.590250492095947266e+00 1.000000000000000000e+00 3.600189971923828125e+01 1.075000000000000000e+01 4.525000000000000000e+01
6.300000000000000000e+01 1.563846153846153356e+03 5.702630615234375000e+02 8.418121337890625000e+00 0.000000000000000000e+00 0.000000000000000000e+00 3.181248046875000000e+03 1.030814409255981445e+00 4.000000000000000000e+00 3.292693786621093750e+02 1.525000000000000000e+01 4.525000000000000000e+01
7.000000000000000000e+01 1.222346153846154266e+03 5.469058837890625000e+02 8.476501464843750000e+00 0.000000000000000000e+00 4.705882370471954346e-01 3.233856201171875000e+03 1.477464914321899414e+00 4.000000000000000000e+00 2.718408813476562500e+02 1.575000000000000000e+01 4.525000000000000000e+01
2.900000000000000000e+01 1.092715384615384437e+03 4.827430419921875000e+02 8.534881591796875000e+00 0.000000000000000000e+00 5.882352963089942932e-02 3.285489257812500000e+03 1.130213260650634766e+00 3.000000000000000000e+00 2.889189758300781250e+02 1.625000000000000000e+01 4.525000000000000000e+01
7.100000000000000000e+01 9.987000000000001592e+02 4.355528869628906250e+02 8.593261718750000000e+00 0.000000000000000000e+00 0.000000000000000000e+00 3.333103271484375000e+03 1.838612198829650879e+00 4.000000000000000000e+00 1.063116989135742188e+02 1.675000000000000000e+01 4.525000000000000000e+01
5.100000000000000000e+01 6.926846153846153129e+02 3.349338073730468750e+02 8.016937255859375000e+00 0.000000000000000000e+00 1.411764740943908691e+00 3.758080566406250000e+03 4.467124462127685547e+00 4.000000000000000000e+00 8.902244567871093750e+01 1.925000000000000000e+01 4.525000000000000000e+01
7.100000000000000000e+01 7.498769230769236174e+02 3.374021301269531250e+02 6.230895996093750000e+00 0.000000000000000000e+00 6.470588445663452148e-01 3.621858398437500000e+03 4.207884788513183594e+00 4.000000000000000000e+00 3.456818542480468750e+02 2.175000000000000000e+01 4.525000000000000000e+01
6.400000000000000000e+01 8.931923076923075087e+02 3.733700561523437500e+02 5.822906494140625000e+00 0.000000000000000000e+00 3.529411852359771729e-01 3.595703125000000000e+03 2.972424745559692383e+00 4.000000000000000000e+00 6.136486206054687500e+02 2.225000000000000000e+01 4.525000000000000000e+01
3.600000000000000000e+01 1.135638461538462252e+03 3.552782287597656250e+02 5.563476562500000000e+00 0.000000000000000000e+00 0.000000000000000000e+00 3.465385009765625000e+03 2.289010047912597656e+00 3.000000000000000000e+00 1.575283935546875000e+03 2.275000000000000000e+01 4.525000000000000000e+01
6.200000000000000000e+01 8.653923076923075541e+02 3.210038146972656250e+02 5.452545166015625000e+00 0.000000000000000000e+00 5.882352963089942932e-02 3.443037109375000000e+03 2.009883403778076172e+00 4.000000000000000000e+00 1.165750488281250000e+03 2.325000000000000000e+01 4.525000000000000000e+01
5.600000000000000000e+01 9.779076923076924004e+02 3.161405334472656250e+02 5.341644287109375000e+00 0.000000000000000000e+00 0.000000000000000000e+00 3.422197265625000000e+03 3.548441410064697266e+00 4.000000000000000000e+00 1.037893676757812500e+03 2.375000000000000000e+01 4.525000000000000000e+01
6.700000000000000000e+01 8.529000000000004320e+02 3.107401428222656250e+02 5.230743408203125000e+00 0.000000000000000000e+00 0.000000000000000000e+00 3.404559326171875000e+03 3.736686706542968750e+00 4.000000000000000000e+00 7.507094726562500000e+02 2.425000000000000000e+01 4.525000000000000000e+01
7.300000000000000000e+01 8.547307692307692832e+02 3.316813049316406250e+02 5.477203369140625000e+00 0.000000000000000000e+00 0.000000000000000000e+00 3.371507324218750000e+03 1.698139309883117676e+00 4.000000000000000000e+00 6.945239868164062500e+02 2.475000000000000000e+01 4.525000000000000000e+01
6.900000000000000000e+01 9.263692307692300574e+02 4.091816406250000000e+02 5.842803955078125000e+00 0.000000000000000000e+00 0.000000000000000000e+00 3.374555419921875000e+03 3.533414602279663086e+00 4.000000000000000000e+00 1.075980468750000000e+03 2.525000000000000000e+01 4.525000000000000000e+01
5.000000000000000000e+01 8.518999999999996362e+02 3.843569946289062500e+02 6.208374023437500000e+00 0.000000000000000000e+00 0.000000000000000000e+00 3.381239013671875000e+03 1.166406631469726562e+00 4.000000000000000000e+00 7.661337890625000000e+02 2.575000000000000000e+01 4.525000000000000000e+01
6.900000000000000000e+01 6.804769230769229580e+02 2.860639953613281250e+02 6.573944091796875000e+00 0.000000000000000000e+00 0.000000000000000000e+00 3.391493652343750000e+03 3.426005840301513672e+00 4.000000000000000000e+00 4.446968078613281250e+02 2.625000000000000000e+01 4.525000000000000000e+01
4.000000000000000000e+00 4.563153846153845734e+02 2.567058105468750000e+02 1.304449462890625000e+01 0.000000000000000000e+00 1.764705896377563477e+00 4.409941894531250000e+03 4.504721641540527344e+00 1.000000000000000000e+00 8.823108673095703125e+00 3.525000000000000000e+01 4.525000000000000000e+01
4.000000000000000000e+00 7.628923076923075541e+02 3.571363830566406250e+02 1.210699462890625000e+01 0.000000000000000000e+00 5.705882549285888672e+00 4.302457031250000000e+03 4.592854022979736328e+00 1.000000000000000000e+00 4.170560359954833984e+00 3.825000000000000000e+01 4.525000000000000000e+01
1.600000000000000000e+01 7.702615384615385210e+02 3.730044555664062500e+02 1.127041625976562500e+01 0.000000000000000000e+00 5.647058963775634766e+00 4.286453613281250000e+03 4.626461505889892578e+00 3.000000000000000000e+00 1.500450801849365234e+01 3.875000000000000000e+01 4.525000000000000000e+01
7.000000000000000000e+00 5.193769230769231626e+02 2.366110382080078125e+02 7.127807617187500000e+00 0.000000000000000000e+00 4.058823585510253906e+00 4.122001953125000000e+03 4.236182212829589844e+00 1.000000000000000000e+00 1.567328948974609375e+02 4.275000000000000000e+01 4.525000000000000000e+01
3.000000000000000000e+00 4.267461538461537884e+02 2.222924041748046875e+02 7.538696289062500000e+00 0.000000000000000000e+00 7.647058963775634766e-01 4.230207519531250000e+03 4.342011928558349609e+00 1.000000000000000000e+00 1.607286529541015625e+02 4.425000000000000000e+01 4.525000000000000000e+01
1.000000000000000000e+00 3.961615384615384414e+02 2.108977355957031250e+02 7.821441650390625000e+00 0.000000000000000000e+00 1.352941155433654785e+00 4.251932128906250000e+03 4.390966892242431641e+00 1.000000000000000000e+00 7.482722473144531250e+01 4.475000000000000000e+01 4.525000000000000000e+01
0.000000000000000000e+00 1.160230769230769567e+02 7.024265289306640625e+01 8.120361328125000000e+00 0.000000000000000000e+00 3.529411852359771729e-01 4.215029785156250000e+03 2.518840312957763672e+00 1.000000000000000000e+00 9.400247192382812500e+01 6.375000000000000000e+01 4.525000000000000000e+01
5.000000000000000000e+00 1.201538461538461320e+02 7.493712615966796875e+01 8.036346435546875000e+00 0.000000000000000000e+00 2.764705896377563477e+00 4.193742187500000000e+03 3.275672197341918945e+00 1.000000000000000000e+00 1.071687164306640625e+02 6.475000000000000000e+01 4.525000000000000000e+01
7.000000000000000000e+00 2.180153846153845620e+02 1.034114913940429688e+02 6.890594482421875000e+00 0.000000000000000000e+00 3.882352828979492188e+00 3.812600585937500000e+03 4.373432636260986328e+00 1.000000000000000000e+00 3.533333129882812500e+02 7.475000000000000000e+01 4.525000000000000000e+01
1.000000000000000000e+00 4.001692307692306372e+02 1.454972991943359375e+02 3.446197509765625000e+00 0.000000000000000000e+00 2.470588207244873047e+00 3.552110595703125000e+03 3.371468544006347656e+00 1.000000000000000000e+00 1.057012817382812500e+03 7.925000000000000000e+01 4.525000000000000000e+01
9.000000000000000000e+00 4.185692307692305576e+02 1.467887725830078125e+02 2.854949951171875000e+00 0.000000000000000000e+00 2.411764621734619141e+00 3.535577392578125000e+03 2.677449226379394531e+00 1.000000000000000000e+00 1.607081054687500000e+03 7.975000000000000000e+01 4.525000000000000000e+01
0.000000000000000000e+00 1.377000000000000739e+02 5.281650543212890625e+01 -4.530029296875000000e-01 0.000000000000000000e+00 0.000000000000000000e+00 2.827528076171875000e+03 3.774526834487915039e+00 1.000000000000000000e+00 8.418442993164062500e+02 1.112500000000000000e+02 4.525000000000000000e+01
0.000000000000000000e+00 1.489384615384614676e+02 5.707684326171875000e+01 -3.882446289062500000e-01 0.000000000000000000e+00 0.000000000000000000e+00 2.845849365234375000e+03 3.724210023880004883e+00 1.000000000000000000e+00 1.001662353515625000e+03 1.117500000000000000e+02 4.525000000000000000e+01
0.000000000000000000e+00 1.514153846153846246e+02 6.034096527099609375e+01 -3.234558105468750000e-01 0.000000000000000000e+00 0.000000000000000000e+00 2.863854248046875000e+03 3.714545249938964844e+00 1.000000000000000000e+00 1.087475097656250000e+03 1.122500000000000000e+02 4.525000000000000000e+01
0.000000000000000000e+00 1.547384615384615358e+02 6.416635131835937500e+01 -3.398132324218750000e-01 0.000000000000000000e+00 0.000000000000000000e+00 2.951421142578125000e+03 3.686532258987426758e+00 1.000000000000000000e+00 1.099843872070312500e+03 1.127500000000000000e+02 4.525000000000000000e+01
0.000000000000000000e+00 1.607999999999999829e+02 7.030151367187500000e+01 -4.372558593750000000e-01 0.000000000000000000e+00 0.000000000000000000e+00 2.964485107421875000e+03 3.704860448837280273e+00 1.000000000000000000e+00 1.102509887695312500e+03 1.132500000000000000e+02 4.525000000000000000e+01
0.000000000000000000e+00 2.004692307692307907e+02 8.622705841064453125e+01 -6.321716308593750000e-01 0.000000000000000000e+00 0.000000000000000000e+00 2.985891357421875000e+03 3.438143014907836914e+00 1.000000000000000000e+00 1.364472534179687500e+03 1.142500000000000000e+02 4.525000000000000000e+01
1.000000000000000000e+00 2.172769230769231115e+02 9.470111083984375000e+01 -8.430480957031250000e-01 9.999999776482582092e-03 5.294117927551269531e-01 3.018868896484375000e+03 3.305307388305664062e+00 1.000000000000000000e+00 1.317159667968750000e+03 1.152500000000000000e+02 4.525000000000000000e+01
0.000000000000000000e+00 2.107615384615384926e+02 9.620716857910156250e+01 -9.496154785156250000e-01 0.000000000000000000e+00 5.294117927551269531e-01 3.015692382812500000e+03 3.429750680923461914e+00 1.000000000000000000e+00 1.034364135742187500e+03 1.157500000000000000e+02 4.525000000000000000e+01
0.000000000000000000e+00 2.287076923076922128e+02 9.956719970703125000e+01 -1.081634521484375000e+00 0.000000000000000000e+00 0.000000000000000000e+00 2.996483154296875000e+03 3.459107398986816406e+00 1.000000000000000000e+00 9.477108154296875000e+02 1.167500000000000000e+02 4.525000000000000000e+01
1.000000000000000000e+00 2.526230769230768942e+02 1.033318939208984375e+02 -1.107086181640625000e+00 0.000000000000000000e+00 3.529411852359771729e-01 2.988149658203125000e+03 3.328932762145996094e+00 1.000000000000000000e+00 8.474971923828125000e+02 1.172500000000000000e+02 4.525000000000000000e+01
1.000000000000000000e+00 2.756076923076923322e+02 1.124297561645507812e+02 -1.132507324218750000e+00 9.999999776482582092e-03 0.000000000000000000e+00 2.980241455078125000e+03 3.290959358215332031e+00 1.000000000000000000e+00 9.339599609375000000e+02 1.177500000000000000e+02 4.525000000000000000e+01
1.000000000000000000e+00 2.756461538461537657e+02 1.182680816650390625e+02 -1.051605224609375000e+00 0.000000000000000000e+00 0.000000000000000000e+00 2.962542724609375000e+03 3.424050569534301758e+00 1.000000000000000000e+00 8.781640014648437500e+02 1.182500000000000000e+02 4.525000000000000000e+01
5.000000000000000000e+00 3.366384615384616268e+02 1.371273193359375000e+02 1.483459472656250000e-01 0.000000000000000000e+00 5.882352963089942932e-02 2.961024902343750000e+03 3.411630153656005859e+00 1.000000000000000000e+00 1.088034179687500000e+03 1.197500000000000000e+02 4.525000000000000000e+01
6.000000000000000000e+00 3.654923076923076906e+02 1.311533660888671875e+02 1.012786865234375000e+00 0.000000000000000000e+00 0.000000000000000000e+00 2.995754394531250000e+03 3.505157709121704102e+00 1.000000000000000000e+00 6.337454833984375000e+02 1.207500000000000000e+02 4.525000000000000000e+01
8.000000000000000000e+00 3.551538461538461320e+02 1.265365371704101562e+02 1.455749511718750000e+00 0.000000000000000000e+00 0.000000000000000000e+00 3.005436279296875000e+03 3.764539957046508789e+00 1.000000000000000000e+00 3.233362121582031250e+02 1.212500000000000000e+02 4.525000000000000000e+01
1.000000000000000000e+00 3.695769230769229807e+02 1.270474700927734375e+02 1.898712158203125000e+00 0.000000000000000000e+00 2.352941185235977173e-01 3.015452392578125000e+03 3.925750970840454102e+00 1.000000000000000000e+00 2.190015106201171875e+02 1.217500000000000000e+02 4.525000000000000000e+01
1.000000000000000000e+00 3.803307692307692491e+02 1.325603332519531250e+02 2.109954833984375000e+00 0.000000000000000000e+00 0.000000000000000000e+00 3.058837158203125000e+03 4.024973869323730469e+00 1.000000000000000000e+00 1.648334808349609375e+02 1.222500000000000000e+02 4.525000000000000000e+01
0.000000000000000000e+00 4.358923076923078384e+02 1.526467590332031250e+02 2.512023925781250000e+00 0.000000000000000000e+00 3.529411852359771729e-01 3.083224609375000000e+03 4.014266490936279297e+00 1.000000000000000000e+00 1.333384094238281250e+02 1.237500000000000000e+02 4.525000000000000000e+01
2.000000000000000000e+00 4.745153846153847326e+02 1.746318054199218750e+02 1.692199707031250000e+00 0.000000000000000000e+00 1.294117689132690430e+00 3.085030273437500000e+03 3.945394039154052734e+00 1.000000000000000000e+00 1.388356781005859375e+02 1.252500000000000000e+02 4.525000000000000000e+01
8.000000000000000000e+00 5.292692307692308304e+02 2.428962402343750000e+02 5.181579589843750000e-01 0.000000000000000000e+00 0.000000000000000000e+00 3.018376953125000000e+03 1.065070986747741699e+00 1.000000000000000000e+00 2.755391845703125000e+02 1.272500000000000000e+02 4.525000000000000000e+01
4.400000000000000000e+01 5.273153846153848008e+02 2.633261413574218750e+02 2.811279296875000000e-01 0.000000000000000000e+00 0.000000000000000000e+00 2.964662109375000000e+03 2.250437974929809570e+00 3.000000000000000000e+00 3.187423095703125000e+02 1.277500000000000000e+02 4.525000000000000000e+01
6.300000000000000000e+01 5.322461538461537884e+02 2.622080078125000000e+02 -2.466735839843750000e-01 9.999999776482582092e-03 0.000000000000000000e+00 2.942704101562500000e+03 2.351416349411010742e+00 4.000000000000000000e+00 9.610608520507812500e+02 1.292500000000000000e+02 4.525000000000000000e+01
5.500000000000000000e+01 5.347846153846154493e+02 2.384672851562500000e+02 -2.136535644531250000e-01 0.000000000000000000e+00 0.000000000000000000e+00 2.901249511718750000e+03 8.954913020133972168e-01 4.000000000000000000e+00 3.585970153808593750e+02 1.297500000000000000e+02 4.525000000000000000e+01
1.800000000000000000e+01 6.338923076923074404e+02 2.766862792968750000e+02 6.043395996093750000e-01 0.000000000000000000e+00 2.176470518112182617e+00 2.767655517578125000e+03 2.153287649154663086e+00 3.000000000000000000e+00 6.916731262207031250e+01 1.332500000000000000e+02 4.525000000000000000e+01
6.300000000000000000e+01 6.698307692307693060e+02 2.966665649414062500e+02 7.377319335937500000e-01 0.000000000000000000e+00 1.235294103622436523e+00 2.754064941406250000e+03 9.486778378486633301e-01 4.000000000000000000e+00 2.928910217285156250e+02 1.337500000000000000e+02 4.525000000000000000e+01
6.500000000000000000e+01 7.063615384615384301e+02 3.016420288085937500e+02 8.710937500000000000e-01 0.000000000000000000e+00 0.000000000000000000e+00 2.738692382812500000e+03 9.096399545669555664e-01 4.000000000000000000e+00 2.148929443359375000e+02 1.342500000000000000e+02 4.525000000000000000e+01
6.700000000000000000e+01 7.580076923076923094e+02 3.120882873535156250e+02 1.004455566406250000e+00 9.999999776482582092e-03 0.000000000000000000e+00 2.722656250000000000e+03 2.231840372085571289e+00 4.000000000000000000e+00 5.781566772460937500e+02 1.347500000000000000e+02 4.525000000000000000e+01
6.600000000000000000e+01 7.981692307692309214e+02 3.265034790039062500e+02 1.348144531250000000e+00 0.000000000000000000e+00 0.000000000000000000e+00 2.613173583984375000e+03 3.048448324203491211e+00 4.000000000000000000e+00 6.520122680664062500e+02 1.352500000000000000e+02 4.525000000000000000e+01
7.100000000000000000e+01 8.169769230769234127e+02 3.436675415039062500e+02 1.902160644531250000e+00 0.000000000000000000e+00 2.352941185235977173e-01 2.594476318359375000e+03 2.410442829132080078e+00 4.000000000000000000e+00 6.272761840820312500e+02 1.357500000000000000e+02 4.525000000000000000e+01
6.300000000000000000e+01 8.010692307692304439e+02 3.702615966796875000e+02 2.456176757812500000e+00 0.000000000000000000e+00 0.000000000000000000e+00 2.575616455078125000e+03 1.299110174179077148e+00 4.000000000000000000e+00 6.591434326171875000e+02 1.362500000000000000e+02 4.525000000000000000e+01
5.300000000000000000e+01 7.750538461538459387e+02 3.868211669921875000e+02 3.010192871093750000e+00 0.000000000000000000e+00 5.882353186607360840e-01 2.557908935546875000e+03 8.812263011932373047e-01 4.000000000000000000e+00 3.148058166503906250e+02 1.367500000000000000e+02 4.525000000000000000e+01
1.800000000000000000e+01 8.577000000000000455e+02 4.564319458007812500e+02 9.696289062500000000e+00 0.000000000000000000e+00 0.000000000000000000e+00 4.287744628906250000e+03 4.394909858703613281e+00 3.000000000000000000e+00 2.697556152343750000e+02 7.500000000000000000e-01 4.575000000000000000e+01
2.900000000000000000e+01 8.920846153846154039e+02 4.758641052246093750e+02 9.369873046875000000e+00 0.000000000000000000e+00 0.000000000000000000e+00 4.232240234375000000e+03 4.307851314544677734e+00 3.000000000000000000e+00 3.257437438964843750e+02 1.250000000000000000e+00 4.575000000000000000e+01
6.300000000000000000e+01 9.159846153846156085e+02 4.545266723632812500e+02 9.043487548828125000e+00 0.000000000000000000e+00 0.000000000000000000e+00 4.181295898437500000e+03 4.137723445892333984e+00 4.000000000000000000e+00 5.036463012695312500e+02 1.750000000000000000e+00 4.575000000000000000e+01
6.900000000000000000e+01 1.047823076923077224e+03 3.280808715820312500e+02 8.369873046875000000e+00 0.000000000000000000e+00 0.000000000000000000e+00 3.824417236328125000e+03 3.753066062927246094e+00 4.000000000000000000e+00 9.089775390625000000e+02 2.750000000000000000e+00 4.575000000000000000e+01
7.300000000000000000e+01 9.715846153846154039e+02 2.622066345214843750e+02 7.693328857421875000e+00 0.000000000000000000e+00 0.000000000000000000e+00 3.715664794921875000e+03 3.968490362167358398e+00 4.000000000000000000e+00 1.066963989257812500e+03 3.750000000000000000e+00 4.575000000000000000e+01
4.200000000000000000e+01 9.439384615384622066e+02 5.011001281738281250e+02 6.333343505859375000e+00 0.000000000000000000e+00 0.000000000000000000e+00 2.889168212890625000e+03 4.046518325805664062e+00 3.000000000000000000e+00 3.627798156738281250e+02 5.750000000000000000e+00 4.575000000000000000e+01
9.000000000000000000e+00 1.126576923076922867e+03 5.082631530761718750e+02 5.786773681640625000e+00 0.000000000000000000e+00 0.000000000000000000e+00 2.813398925781250000e+03 2.860784769058227539e+00 1.000000000000000000e+00 9.190549316406250000e+02 6.250000000000000000e+00 4.575000000000000000e+01
3.000000000000000000e+00 1.769692307692307622e+03 3.639346313476562500e+02 4.693603515625000000e+00 0.000000000000000000e+00 0.000000000000000000e+00 2.647833251953125000e+03 2.177867650985717773e+00 1.000000000000000000e+00 1.460528442382812500e+03 7.250000000000000000e+00 4.575000000000000000e+01
4.600000000000000000e+01 1.329030769230769010e+03 3.958011779785156250e+02 4.150390625000000000e+00 0.000000000000000000e+00 0.000000000000000000e+00 2.276390380859375000e+03 3.870773553848266602e+00 4.000000000000000000e+00 7.533843994140625000e+02 8.250000000000000000e+00 4.575000000000000000e+01
1.900000000000000000e+01 1.318461538461538112e+03 4.877709350585937500e+02 3.970428466796875000e+00 0.000000000000000000e+00 0.000000000000000000e+00 2.203824218750000000e+03 4.301457405090332031e+00 3.000000000000000000e+00 3.028179016113281250e+02 8.750000000000000000e+00 4.575000000000000000e+01
5.300000000000000000e+01 1.196130769230770284e+03 4.310928649902343750e+02 3.865051269531250000e+00 0.000000000000000000e+00 0.000000000000000000e+00 2.021939941406250000e+03 3.947167634963989258e+00 4.000000000000000000e+00 5.699405517578125000e+02 9.750000000000000000e+00 4.575000000000000000e+01
3.800000000000000000e+01 1.132699999999999818e+03 4.309893188476562500e+02 4.024444580078125000e+00 0.000000000000000000e+00 0.000000000000000000e+00 2.024032104492187500e+03 3.555877685546875000e+00 3.000000000000000000e+00 8.053302612304687500e+02 1.025000000000000000e+01 4.575000000000000000e+01
3.400000000000000000e+01 1.414115384615384983e+03 4.260357666015625000e+02 6.883178710937500000e+00 0.000000000000000000e+00 5.294117927551269531e-01 2.667325927734375000e+03 4.354772567749023438e+00 3.000000000000000000e+00 3.148693237304687500e+02 1.375000000000000000e+01 4.575000000000000000e+01
6.800000000000000000e+01 1.609830769230769192e+03 3.788326721191406250e+02 7.027252197265625000e+00 0.000000000000000000e+00 0.000000000000000000e+00 2.750453369140625000e+03 2.812569856643676758e+00 4.000000000000000000e+00 7.184689941406250000e+02 1.425000000000000000e+01 4.575000000000000000e+01
5.100000000000000000e+01 1.510769230769230262e+03 5.586211547851562500e+02 7.171356201171875000e+00 0.000000000000000000e+00 0.000000000000000000e+00 2.829220703125000000e+03 1.723096251487731934e+00 4.000000000000000000e+00 6.200405273437500000e+02 1.475000000000000000e+01 4.575000000000000000e+01
4.500000000000000000e+01 1.328638461538461115e+03 5.265714111328125000e+02 7.339172363281250000e+00 0.000000000000000000e+00 5.882352963089942932e-02 3.166394775390625000e+03 1.584775209426879883e+00 4.000000000000000000e+00 5.017918090820312500e+02 1.525000000000000000e+01 4.575000000000000000e+01
2.000000000000000000e+01 1.059699999999999818e+03 4.626307983398437500e+02 7.530731201171875000e+00 0.000000000000000000e+00 0.000000000000000000e+00 3.236238281250000000e+03 4.165680885314941406e+00 3.000000000000000000e+00 1.862910156250000000e+02 1.575000000000000000e+01 4.575000000000000000e+01
7.100000000000000000e+01 8.813000000000005230e+02 3.932568359375000000e+02 7.913848876953125000e+00 0.000000000000000000e+00 0.000000000000000000e+00 3.370561279296875000e+03 4.317447185516357422e+00 4.000000000000000000e+00 1.528662109375000000e+02 1.675000000000000000e+01 4.575000000000000000e+01
6.300000000000000000e+01 8.604461538461540613e+02 4.040977478027343750e+02 8.001770019531250000e+00 0.000000000000000000e+00 5.882352963089942932e-02 3.615131347656250000e+03 2.229992151260375977e+00 4.000000000000000000e+00 1.745360717773437500e+02 1.725000000000000000e+01 4.575000000000000000e+01
4.700000000000000000e+01 7.147999999999999545e+02 3.468561401367187500e+02 8.108551025390625000e+00 0.000000000000000000e+00 1.176470592617988586e-01 3.689943603515625000e+03 4.323982715606689453e+00 4.000000000000000000e+00 9.032392120361328125e+01 1.825000000000000000e+01 4.575000000000000000e+01
6.100000000000000000e+01 7.864769230769231854e+02 3.411049194335937500e+02 6.026062011718750000e+00 0.000000000000000000e+00 5.882352963089942932e-02 3.586125976562500000e+03 4.016117095947265625e+00 4.000000000000000000e+00 4.017265625000000000e+02 2.225000000000000000e+01 4.575000000000000000e+01
2.100000000000000000e+01 7.879769230769228443e+02 2.865333251953125000e+02 5.535034179687500000e+00 0.000000000000000000e+00 8.823529481887817383e-01 3.436637695312500000e+03 2.345639467239379883e+00 3.000000000000000000e+00 4.901921997070312500e+02 2.325000000000000000e+01 4.575000000000000000e+01
9.000000000000000000e+00 7.376923076923075087e+02 3.110977478027343750e+02 5.143890380859375000e+00 0.000000000000000000e+00 2.941176593303680420e-01 3.381967285156250000e+03 2.812011480331420898e+00 1.000000000000000000e+00 4.534483642578125000e+02 2.425000000000000000e+01 4.575000000000000000e+01
1.200000000000000000e+01 7.191846153846153129e+02 3.855212402343750000e+02 5.526611328125000000e+00 0.000000000000000000e+00 4.705882370471954346e-01 3.357462158203125000e+03 3.751412868499755859e+00 3.000000000000000000e+00 5.858863525390625000e+02 2.525000000000000000e+01 4.575000000000000000e+01
4.500000000000000000e+01 7.535000000000002274e+02 2.962757873535156250e+02 6.019866943359375000e+00 0.000000000000000000e+00 5.882353186607360840e-01 3.378845458984375000e+03 3.674422979354858398e+00 4.000000000000000000e+00 1.138458374023437500e+03 2.625000000000000000e+01 4.575000000000000000e+01
1.000000000000000000e+01 4.899692307692307054e+02 2.543497314453125000e+02 7.406127929687500000e+00 0.000000000000000000e+00 3.294117689132690430e+00 4.107005371093750000e+03 4.333085060119628906e+00 3.000000000000000000e+00 1.418901367187500000e+02 4.225000000000000000e+01 4.575000000000000000e+01
1.000000000000000000e+00 4.534076923076920593e+02 2.359705352783203125e+02 7.071014404296875000e+00 0.000000000000000000e+00 2.705882310867309570e+00 4.171558593750000000e+03 4.322452545166015625e+00 1.000000000000000000e+00 8.567384338378906250e+01 4.325000000000000000e+01 4.575000000000000000e+01
1.000000000000000000e+00 4.293307692307691923e+02 2.334941864013671875e+02 7.340911865234375000e+00 0.000000000000000000e+00 8.235294222831726074e-01 4.196275390625000000e+03 4.335695266723632812e+00 1.000000000000000000e+00 7.797473144531250000e+01 4.375000000000000000e+01 4.575000000000000000e+01
2.000000000000000000e+00 3.942384615384614222e+02 2.210529785156250000e+02 7.610778808593750000e+00 0.000000000000000000e+00 1.352941155433654785e+00 4.226070800781250000e+03 4.352745056152343750e+00 1.000000000000000000e+00 6.366709899902343750e+01 4.425000000000000000e+01 4.575000000000000000e+01
3.000000000000000000e+00 3.658076923076922640e+02 2.017723999023437500e+02 7.880645751953125000e+00 0.000000000000000000e+00 2.117647171020507812e+00 4.255615234375000000e+03 4.372361183166503906e+00 1.000000000000000000e+00 1.310323181152343750e+02 4.475000000000000000e+01 4.575000000000000000e+01
1.000000000000000000e+00 3.320846153846152902e+02 1.791538085937500000e+02 8.264068603515625000e+00 0.000000000000000000e+00 1.411764740943908691e+00 4.379173828125000000e+03 4.406159400939941406e+00 1.000000000000000000e+00 2.583741378784179688e+01 4.525000000000000000e+01 4.575000000000000000e+01
1.000000000000000000e+00 3.305923076923078270e+02 1.310592803955078125e+02 4.085327148437500000e+00 0.000000000000000000e+00 1.000000000000000000e+00 3.654980957031250000e+03 4.177715301513671875e+00 1.000000000000000000e+00 4.151624755859375000e+02 7.875000000000000000e+01 4.575000000000000000e+01
6.000000000000000000e+00 3.879153846153846530e+02 1.556533966064453125e+02 2.527984619140625000e+00 0.000000000000000000e+00 1.352941155433654785e+00 3.368073974609375000e+03 2.888344049453735352e+00 1.000000000000000000e+00 1.724714111328125000e+03 8.125000000000000000e+01 4.575000000000000000e+01
4.000000000000000000e+00 2.184076923076922583e+02 1.059341278076171875e+02 2.549285888671875000e+00 0.000000000000000000e+00 0.000000000000000000e+00 3.176130126953125000e+03 4.097127914428710938e+00 1.000000000000000000e+00 1.661035278320312500e+03 8.325000000000000000e+01 4.575000000000000000e+01
0.000000000000000000e+00 1.913230769230769397e+02 8.442748260498046875e+01 2.554748535156250000e+00 0.000000000000000000e+00 0.000000000000000000e+00 3.119267089843750000e+03 2.675848722457885742e+00 1.000000000000000000e+00 1.279547485351562500e+03 8.425000000000000000e+01 4.575000000000000000e+01
0.000000000000000000e+00 1.846923076923077360e+02 8.747782135009765625e+01 -3.916900634765625000e+00 0.000000000000000000e+00 0.000000000000000000e+00 2.185234375000000000e+03 3.309525012969970703e+00 1.000000000000000000e+00 1.882828979492187500e+03 1.017500000000000000e+02 4.575000000000000000e+01
0.000000000000000000e+00 1.696923076923077929e+02 5.698627090454101562e+01 -2.280639648437500000e+00 0.000000000000000000e+00 0.000000000000000000e+00 2.464216796875000000e+03 2.730798006057739258e+00 1.000000000000000000e+00 1.443422973632812500e+03 1.037500000000000000e+02 4.575000000000000000e+01
0.000000000000000000e+00 1.496538461538461604e+02 5.487875366210937500e+01 -2.072479248046875000e+00 0.000000000000000000e+00 0.000000000000000000e+00 2.492187255859375000e+03 2.870200872421264648e+00 1.000000000000000000e+00 1.422363891601562500e+03 1.042500000000000000e+02 4.575000000000000000e+01
0.000000000000000000e+00 1.253923076923076962e+02 5.975689315795898438e+01 -2.112121582031250000e+00 0.000000000000000000e+00 4.705882370471954346e-01 2.644443115234375000e+03 1.885570883750915527e+00 1.000000000000000000e+00 1.206442138671875000e+03 1.087500000000000000e+02 4.575000000000000000e+01
0.000000000000000000e+00 1.437923076923077019e+02 5.584110641479492188e+01 -1.781188964843750000e+00 0.000000000000000000e+00 0.000000000000000000e+00 2.720242675781250000e+03 2.739195585250854492e+00 1.000000000000000000e+00 1.000165161132812500e+03 1.102500000000000000e+02 4.575000000000000000e+01
0.000000000000000000e+00 1.552846153846153925e+02 5.776284408569335938e+01 -1.652465820312500000e+00 0.000000000000000000e+00 0.000000000000000000e+00 2.798014892578125000e+03 3.324210882186889648e+00 1.000000000000000000e+00 1.179196777343750000e+03 1.107500000000000000e+02 4.575000000000000000e+01
0.000000000000000000e+00 1.581692307692307793e+02 5.907229995727539062e+01 -1.468505859375000000e+00 0.000000000000000000e+00 0.000000000000000000e+00 2.821387939453125000e+03 3.640022754669189453e+00 1.000000000000000000e+00 1.018305603027343750e+03 1.112500000000000000e+02 4.575000000000000000e+01
0.000000000000000000e+00 1.676153846153845848e+02 6.205965042114257812e+01 -1.100616455078125000e+00 0.000000000000000000e+00 0.000000000000000000e+00 2.872794921875000000e+03 3.630087852478027344e+00 1.000000000000000000e+00 1.162327636718750000e+03 1.122500000000000000e+02 4.575000000000000000e+01
0.000000000000000000e+00 1.736384615384615131e+02 6.393548965454101562e+01 -9.751892089843750000e-01 0.000000000000000000e+00 0.000000000000000000e+00 2.952333496093750000e+03 3.624629497528076172e+00 1.000000000000000000e+00 8.769970703125000000e+02 1.127500000000000000e+02 4.575000000000000000e+01
0.000000000000000000e+00 1.739307692307691866e+02 6.801329803466796875e+01 -9.083251953125000000e-01 0.000000000000000000e+00 0.000000000000000000e+00 2.969974365234375000e+03 3.625866889953613281e+00 1.000000000000000000e+00 1.154508178710937500e+03 1.132500000000000000e+02 4.575000000000000000e+01
1.000000000000000000e+00 1.841846153846154834e+02 7.345921325683593750e+01 -8.414306640625000000e-01 0.000000000000000000e+00 0.000000000000000000e+00 2.987078613281250000e+03 3.572176933288574219e+00 1.000000000000000000e+00 1.233387695312500000e+03 1.137500000000000000e+02 4.575000000000000000e+01
2.000000000000000000e+00 2.119230769230769340e+02 9.359906768798828125e+01 -8.601074218750000000e-01 9.999999776482582092e-03 9.411764740943908691e-01 3.026274169921875000e+03 3.297754526138305664e+00 1.000000000000000000e+00 1.239192993164062500e+03 1.152500000000000000e+02 4.575000000000000000e+01
1.000000000000000000e+00 2.121384615384615131e+02 9.514135742187500000e+01 -9.185791015625000000e-01 0.000000000000000000e+00 8.235294222831726074e-01 3.021312744140625000e+03 3.385429143905639648e+00 1.000000000000000000e+00 9.869625244140625000e+02 1.157500000000000000e+02 4.575000000000000000e+01
1.000000000000000000e+00 2.679307692307691582e+02 1.158544387817382812e+02 -1.218597412109375000e+00 0.000000000000000000e+00 0.000000000000000000e+00 2.956507568359375000e+03 3.403559923171997070e+00 1.000000000000000000e+00 8.709359130859375000e+02 1.182500000000000000e+02 4.575000000000000000e+01
4.000000000000000000e+00 3.481461538461537657e+02 1.504375457763671875e+02 -6.256103515625000000e-02 0.000000000000000000e+00 0.000000000000000000e+00 2.978351318359375000e+03 3.351841211318969727e+00 1.000000000000000000e+00 7.260017089843750000e+02 1.202500000000000000e+02 4.575000000000000000e+01
2.000000000000000000e+00 3.692461538461540158e+02 1.497860717773437500e+02 3.470153808593750000e-01 0.000000000000000000e+00 0.000000000000000000e+00 2.990521728515625000e+03 3.380518198013305664e+00 1.000000000000000000e+00 6.861577148437500000e+02 1.207500000000000000e+02 4.575000000000000000e+01
2.000000000000000000e+00 3.763846153846153584e+02 1.429813995361328125e+02 1.166229248046875000e+00 0.000000000000000000e+00 5.294117927551269531e-01 3.017822265625000000e+03 3.804078340530395508e+00 1.000000000000000000e+00 3.196965026855468750e+02 1.217500000000000000e+02 4.575000000000000000e+01
2.000000000000000000e+00 4.082692307692307736e+02 1.491020965576171875e+02 1.746704101562500000e+00 0.000000000000000000e+00 2.941176593303680420e-01 3.085043457031250000e+03 3.991015195846557617e+00 1.000000000000000000e+00 1.383137969970703125e+02 1.232500000000000000e+02 4.575000000000000000e+01
1.000000000000000000e+00 4.481461538461542204e+02 1.659469909667968750e+02 1.511505126953125000e+00 0.000000000000000000e+00 1.000000000000000000e+00 3.096301269531250000e+03 3.931735754013061523e+00 1.000000000000000000e+00 1.280071411132812500e+02 1.247500000000000000e+02 4.575000000000000000e+01
2.700000000000000000e+01 5.089846153846155516e+02 2.420234832763671875e+02 -1.095581054687500000e-01 0.000000000000000000e+00 0.000000000000000000e+00 2.952779296875000000e+03 1.891128063201904297e+00 3.000000000000000000e+00 2.721957702636718750e+02 1.282500000000000000e+02 4.575000000000000000e+01
5.300000000000000000e+01 5.221461538461539931e+02 2.439582366943359375e+02 -4.724121093750000000e-01 0.000000000000000000e+00 1.235294103622436523e+00 2.933468261718750000e+03 9.653701186180114746e-01 4.000000000000000000e+00 3.113809204101562500e+02 1.292500000000000000e+02 4.575000000000000000e+01
3.500000000000000000e+01 5.278615384615385437e+02 2.320568084716796875e+02 -4.459838867187500000e-01 0.000000000000000000e+00 2.941176593303680420e-01 2.898499023437500000e+03 1.750702619552612305e+00 3.000000000000000000e+00 3.683814392089843750e+02 1.297500000000000000e+02 4.575000000000000000e+01
3.800000000000000000e+01 5.075307692307692946e+02 2.217304687500000000e+02 -3.502502441406250000e-01 0.000000000000000000e+00 2.352941185235977173e-01 2.898164062500000000e+03 1.045879960060119629e+00 3.000000000000000000e+00 6.270722656250000000e+02 1.302500000000000000e+02 4.575000000000000000e+01
2.400000000000000000e+01 5.596384615384617973e+02 2.148931579589843750e+02 5.392456054687500000e-02 0.000000000000000000e+00 1.176470592617988586e-01 2.852387451171875000e+03 3.017948150634765625e+00 3.000000000000000000e+00 1.576517028808593750e+02 1.322500000000000000e+02 4.575000000000000000e+01
4.300000000000000000e+01 6.581615384615387256e+02 2.978005065917968750e+02 3.660888671875000000e-01 0.000000000000000000e+00 2.647058725357055664e+00 2.763188476562500000e+03 9.740961790084838867e-01 3.000000000000000000e+00 1.100410156250000000e+02 1.337500000000000000e+02 4.575000000000000000e+01
5.300000000000000000e+01 6.956846153846153129e+02 3.066089477539062500e+02 4.669189453125000000e-01 0.000000000000000000e+00 1.529411792755126953e+00 2.741257324218750000e+03 9.446989893913269043e-01 4.000000000000000000e+00 2.250036773681640625e+02 1.342500000000000000e+02 4.575000000000000000e+01
6.300000000000000000e+01 7.283000000000002956e+02 3.204596862792968750e+02 5.677490234375000000e-01 0.000000000000000000e+00 1.647058844566345215e+00 2.719572998046875000e+03 9.107708930969238281e-01 4.000000000000000000e+00 1.695250549316406250e+02 1.347500000000000000e+02 4.575000000000000000e+01
6.200000000000000000e+01 7.749846153846153811e+02 3.349423828125000000e+02 8.323974609375000000e-01 0.000000000000000000e+00 0.000000000000000000e+00 2.621334472656250000e+03 8.576078414916992188e-01 4.000000000000000000e+00 3.177558288574218750e+02 1.352500000000000000e+02 4.575000000000000000e+01
6.500000000000000000e+01 8.020461538461538566e+02 3.509759521484375000e+02 1.260833740234375000e+00 9.999999776482582092e-03 0.000000000000000000e+00 2.595885498046875000e+03 1.938465476036071777e+00 4.000000000000000000e+00 6.819748535156250000e+02 1.357500000000000000e+02 4.575000000000000000e+01
5.100000000000000000e+01 8.448000000000004093e+02 3.687958679199218750e+02 1.689270019531250000e+00 9.999999776482582092e-03 0.000000000000000000e+00 2.569147460937500000e+03 2.774328470230102539e+00 4.000000000000000000e+00 7.971458129882812500e+02 1.362500000000000000e+02 4.575000000000000000e+01
6.600000000000000000e+01 8.545923076923080544e+02 3.863203125000000000e+02 2.117706298828125000e+00 0.000000000000000000e+00 5.294117927551269531e-01 2.545416992187500000e+03 1.498803377151489258e+00 4.000000000000000000e+00 4.761125488281250000e+02 1.367500000000000000e+02 4.575000000000000000e+01
4.700000000000000000e+01 8.157846153846148809e+02 3.865262145996093750e+02 2.656951904296875000e+00 0.000000000000000000e+00 0.000000000000000000e+00 2.470646240234375000e+03 1.675145387649536133e+00 4.000000000000000000e+00 9.141962890625000000e+02 1.372500000000000000e+02 4.575000000000000000e+01
7.000000000000000000e+00 7.921153846153845279e+02 4.443478088378906250e+02 9.674530029296875000e+00 0.000000000000000000e+00 0.000000000000000000e+00 4.291537597656250000e+03 4.373728275299072266e+00 1.000000000000000000e+00 1.834611968994140625e+02 7.500000000000000000e-01 4.625000000000000000e+01
1.400000000000000000e+01 8.526384615384617973e+02 4.883807678222656250e+02 9.313598632812500000e+00 0.000000000000000000e+00 0.000000000000000000e+00 4.210311523437500000e+03 4.305347442626953125e+00 3.000000000000000000e+00 3.015680236816406250e+02 1.250000000000000000e+00 4.625000000000000000e+01
1.800000000000000000e+01 8.770846153846155175e+02 4.613254089355468750e+02 8.952667236328125000e+00 0.000000000000000000e+00 0.000000000000000000e+00 4.059647216796875000e+03 4.192960262298583984e+00 3.000000000000000000e+00 4.798696594238281250e+02 1.750000000000000000e+00 4.625000000000000000e+01
1.500000000000000000e+01 8.555923076923079407e+02 4.019993591308593750e+02 8.576141357421875000e+00 0.000000000000000000e+00 0.000000000000000000e+00 4.023332763671875000e+03 4.127761840820312500e+00 3.000000000000000000e+00 4.497769775390625000e+02 2.250000000000000000e+00 4.625000000000000000e+01
3.000000000000000000e+01 8.170769230769233218e+02 2.956444702148437500e+02 8.194427490234375000e+00 0.000000000000000000e+00 0.000000000000000000e+00 3.832802001953125000e+03 4.112812042236328125e+00 3.000000000000000000e+00 4.354401550292968750e+02 2.750000000000000000e+00 4.625000000000000000e+01
5.800000000000000000e+01 8.404461538461534929e+02 2.865803833007812500e+02 7.431030273437500000e+00 0.000000000000000000e+00 0.000000000000000000e+00 3.640501708984375000e+03 4.171998977661132812e+00 4.000000000000000000e+00 4.181563110351562500e+02 3.750000000000000000e+00 4.625000000000000000e+01
1.800000000000000000e+01 8.925461538461531745e+02 3.460258483886718750e+02 7.029174804687500000e+00 0.000000000000000000e+00 0.000000000000000000e+00 3.435753662109375000e+03 4.156872272491455078e+00 3.000000000000000000e+00 3.905324401855468750e+02 4.250000000000000000e+00 4.625000000000000000e+01
1.100000000000000000e+01 8.632153846153844370e+02 4.629913024902343750e+02 6.225494384765625000e+00 0.000000000000000000e+00 0.000000000000000000e+00 3.174245849609375000e+03 4.218112468719482422e+00 3.000000000000000000e+00 2.413224487304687500e+02 5.250000000000000000e+00 4.625000000000000000e+01
3.600000000000000000e+01 1.096600000000000364e+03 5.358601684570312500e+02 5.771728515625000000e+00 0.000000000000000000e+00 0.000000000000000000e+00 3.123279052734375000e+03 3.876864194869995117e+00 3.000000000000000000e+00 9.123316650390625000e+02 5.750000000000000000e+00 4.625000000000000000e+01
4.700000000000000000e+01 1.304707692307692469e+03 4.808370056152343750e+02 4.552795410156250000e+00 0.000000000000000000e+00 0.000000000000000000e+00 2.719522216796875000e+03 8.989672660827636719e-01 4.000000000000000000e+00 1.565634887695312500e+03 6.750000000000000000e+00 4.625000000000000000e+01
5.000000000000000000e+01 1.867392307692307668e+03 3.602604980468750000e+02 3.943328857421875000e+00 0.000000000000000000e+00 0.000000000000000000e+00 2.542814697265625000e+03 2.155488014221191406e+00 4.000000000000000000e+00 1.525784179687500000e+03 7.250000000000000000e+00 4.625000000000000000e+01
5.100000000000000000e+01 1.995546153846152947e+03 5.529826049804687500e+02 3.010772705078125000e+00 2.195018529891967773e-01 0.000000000000000000e+00 2.269812744140625000e+03 1.845074057579040527e+00 4.000000000000000000e+00 1.562380126953125000e+03 8.250000000000000000e+00 4.625000000000000000e+01
1.400000000000000000e+01 1.882723076923076860e+03 5.401695556640625000e+02 2.592254638671875000e+00 0.000000000000000000e+00 0.000000000000000000e+00 2.139991455078125000e+03 2.733176946640014648e+00 3.000000000000000000e+00 1.227802124023437500e+03 8.750000000000000000e+00 4.625000000000000000e+01
5.700000000000000000e+01 1.794707692307691786e+03 4.030898742675781250e+02 2.312866210937500000e+00 0.000000000000000000e+00 0.000000000000000000e+00 1.984836914062500000e+03 1.230684280395507812e+00 4.000000000000000000e+00 1.221598144531250000e+03 1.025000000000000000e+01 4.625000000000000000e+01
4.900000000000000000e+01 1.192507692307691968e+03 3.531872863769531250e+02 2.591491699218750000e+00 0.000000000000000000e+00 0.000000000000000000e+00 2.008832641601562500e+03 2.883686780929565430e+00 4.000000000000000000e+00 8.874160156250000000e+02 1.125000000000000000e+01 4.625000000000000000e+01
6.600000000000000000e+01 1.443992307692307577e+03 4.390767211914062500e+02 3.652435302734375000e+00 0.000000000000000000e+00 0.000000000000000000e+00 2.212489013671875000e+03 2.856019735336303711e+00 4.000000000000000000e+00 1.143684082031250000e+03 1.225000000000000000e+01 4.625000000000000000e+01
3.500000000000000000e+01 1.567753846153845871e+03 4.436113891601562500e+02 4.182922363281250000e+00 0.000000000000000000e+00 0.000000000000000000e+00 2.376396240234375000e+03 2.949452400207519531e+00 3.000000000000000000e+00 7.804390258789062500e+02 1.275000000000000000e+01 4.625000000000000000e+01
7.200000000000000000e+01 1.993430769230768874e+03 4.685329589843750000e+02 4.681915283203125000e+00 0.000000000000000000e+00 2.352941185235977173e-01 2.421517089843750000e+03 3.640409231185913086e+00 4.000000000000000000e+00 5.794313354492187500e+02 1.325000000000000000e+01 4.625000000000000000e+01
5.600000000000000000e+01 1.676892307692307213e+03 3.469047241210937500e+02 5.491027832031250000e+00 0.000000000000000000e+00 0.000000000000000000e+00 2.765679687500000000e+03 2.122287988662719727e+00 4.000000000000000000e+00 6.331782226562500000e+02 1.425000000000000000e+01 4.625000000000000000e+01
5.400000000000000000e+01 1.300138461538461570e+03 5.044712524414062500e+02 5.895599365234375000e+00 0.000000000000000000e+00 0.000000000000000000e+00 2.973849853515625000e+03 3.849479675292968750e+00 4.000000000000000000e+00 8.231707153320312500e+02 1.475000000000000000e+01 4.625000000000000000e+01
5.800000000000000000e+01 1.021253846153846212e+03 4.202507934570312500e+02 6.584960937500000000e+00 0.000000000000000000e+00 0.000000000000000000e+00 3.234117675781250000e+03 2.725453376770019531e+00 4.000000000000000000e+00 3.645014343261718750e+02 1.575000000000000000e+01 4.625000000000000000e+01
1.200000000000000000e+01 8.991461538461534246e+02 3.859645385742187500e+02 6.909698486328125000e+00 0.000000000000000000e+00 0.000000000000000000e+00 3.347152343750000000e+03 4.314034938812255859e+00 3.000000000000000000e+00 2.177245178222656250e+02 1.625000000000000000e+01 4.625000000000000000e+01
1.400000000000000000e+01 7.912923076923075314e+02 3.588904724121093750e+02 7.234405517578125000e+00 0.000000000000000000e+00 0.000000000000000000e+00 3.517434326171875000e+03 3.813826322555541992e+00 3.000000000000000000e+00 1.371667480468750000e+02 1.675000000000000000e+01 4.625000000000000000e+01
5.400000000000000000e+01 7.288538461538458932e+02 3.550543212890625000e+02 7.450714111328125000e+00 0.000000000000000000e+00 5.294117927551269531e-01 3.549585937500000000e+03 4.264441490173339844e+00 4.000000000000000000e+00 1.481658782958984375e+02 1.725000000000000000e+01 4.625000000000000000e+01
6.300000000000000000e+01 6.832846153846153356e+02 3.262342224121093750e+02 7.630920410156250000e+00 0.000000000000000000e+00 5.294117927551269531e-01 3.671193359375000000e+03 4.270657539367675781e+00 4.000000000000000000e+00 2.170709838867187500e+02 1.775000000000000000e+01 4.625000000000000000e+01
4.800000000000000000e+01 6.533230769230765418e+02 3.052896423339843750e+02 7.811126708984375000e+00 0.000000000000000000e+00 4.705882370471954346e-01 3.733875732421875000e+03 4.269216537475585938e+00 4.000000000000000000e+00 2.412832031250000000e+02 1.825000000000000000e+01 4.625000000000000000e+01
7.700000000000000000e+01 8.369230769230772466e+02 2.766224670410156250e+02 5.897735595703125000e+00 0.000000000000000000e+00 2.352941185235977173e-01 3.471583251953125000e+03 3.797700643539428711e+00 4.000000000000000000e+00 4.785425415039062500e+02 2.275000000000000000e+01 4.625000000000000000e+01
1.800000000000000000e+01 9.655769230769238902e+02 2.935369262695312500e+02 5.617492675781250000e+00 0.000000000000000000e+00 2.941176593303680420e-01 3.431010009765625000e+03 1.604254841804504395e+00 3.000000000000000000e+00 1.033437988281250000e+03 2.325000000000000000e+01 4.625000000000000000e+01
6.000000000000000000e+00 6.346846153846150855e+02 2.799256591796875000e+02 5.057037353515625000e+00 0.000000000000000000e+00 5.882353186607360840e-01 3.264865966796875000e+03 4.058961868286132812e+00 1.000000000000000000e+00 3.585974426269531250e+02 2.425000000000000000e+01 4.625000000000000000e+01
8.000000000000000000e+00 6.510615384615383618e+02 2.885718383789062500e+02 5.082733154296875000e+00 0.000000000000000000e+00 3.529411852359771729e-01 3.259449707031250000e+03 3.948947429656982422e+00 1.000000000000000000e+00 4.201487426757812500e+02 2.475000000000000000e+01 4.625000000000000000e+01
4.800000000000000000e+01 6.757923076923076451e+02 2.715571594238281250e+02 5.338104248046875000e+00 0.000000000000000000e+00 0.000000000000000000e+00 3.341862548828125000e+03 2.008599996566772461e+00 4.000000000000000000e+00 1.183108032226562500e+03 2.575000000000000000e+01 4.625000000000000000e+01
6.800000000000000000e+01 6.721999999999995907e+02 2.600877685546875000e+02 5.465789794921875000e+00 0.000000000000000000e+00 0.000000000000000000e+00 3.314725097656250000e+03 3.562555313110351562e+00 4.000000000000000000e+00 1.058904052734375000e+03 2.625000000000000000e+01 4.625000000000000000e+01
0.000000000000000000e+00 4.087538461538461547e+02 2.381940765380859375e+02 7.425842285156250000e+00 0.000000000000000000e+00 1.705882310867309570e+00 4.173221191406250000e+03 4.333325386047363281e+00 1.000000000000000000e+00 7.491331481933593750e+01 4.375000000000000000e+01 4.625000000000000000e+01
4.000000000000000000e+00 3.867384615384617632e+02 2.226006469726562500e+02 7.682830810546875000e+00 0.000000000000000000e+00 1.352941155433654785e+00 4.223309082031250000e+03 4.321567058563232422e+00 1.000000000000000000e+00 1.615458374023437500e+02 4.425000000000000000e+01 4.625000000000000000e+01
0.000000000000000000e+00 1.573076923076923208e+02 8.037389373779296875e+01 5.773498535156250000e+00 0.000000000000000000e+00 0.000000000000000000e+00 3.880766601562500000e+03 4.276530742645263672e+00 1.000000000000000000e+00 2.128066406250000000e+02 6.725000000000000000e+01 4.625000000000000000e+01
0.000000000000000000e+00 3.180000000000001137e+02 1.328587036132812500e+02 3.889282226562500000e+00 0.000000000000000000e+00 3.529411852359771729e-01 3.561658935546875000e+03 4.159674644470214844e+00 1.000000000000000000e+00 5.056804199218750000e+02 7.925000000000000000e+01 4.625000000000000000e+01
1.000000000000000000e+00 3.369692307692308191e+02 1.499842834472656250e+02 3.645355224609375000e+00 0.000000000000000000e+00 5.882353186607360840e-01 3.528357666015625000e+03 4.111396312713623047e+00 1.000000000000000000e+00 5.303114013671875000e+02 7.975000000000000000e+01 4.625000000000000000e+01
1.000000000000000000e+00 3.333692307692308532e+02 1.663950653076171875e+02 3.401458740234375000e+00 0.000000000000000000e+00 1.117647051811218262e+00 3.393798095703125000e+03 4.100399017333984375e+00 1.000000000000000000e+00 4.624917602539062500e+02 8.025000000000000000e+01 4.625000000000000000e+01
1.000000000000000000e+00 2.877461538461538453e+02 1.384504089355468750e+02 3.297393798828125000e+00 0.000000000000000000e+00 1.529411792755126953e+00 3.221254882812500000e+03 4.078958988189697266e+00 1.000000000000000000e+00 4.393066711425781250e+02 8.225000000000000000e+01 4.625000000000000000e+01
1.000000000000000000e+00 2.832692307692308873e+02 1.245908889770507812e+02 3.269378662109375000e+00 0.000000000000000000e+00 1.764705896377563477e+00 3.203894287109375000e+03 4.009276866912841797e+00 1.000000000000000000e+00 6.662623901367187500e+02 8.275000000000000000e+01 4.625000000000000000e+01
3.000000000000000000e+00 2.689769230769229011e+02 1.198881607055664062e+02 3.189117431640625000e+00 0.000000000000000000e+00 1.352941155433654785e+00 3.185132324218750000e+03 4.059667110443115234e+00 1.000000000000000000e+00 5.121603393554687500e+02 8.325000000000000000e+01 4.625000000000000000e+01
2.000000000000000000e+00 2.383769230769231058e+02 1.150400390625000000e+02 3.108825683593750000e+00 0.000000000000000000e+00 5.882352963089942932e-02 3.135593750000000000e+03 4.094310760498046875e+00 1.000000000000000000e+00 7.469900512695312500e+02 8.375000000000000000e+01 4.625000000000000000e+01
3.000000000000000000e+00 1.949769230769231001e+02 6.073199081420898438e+01 -2.260467529296875000e+00 0.000000000000000000e+00 0.000000000000000000e+00 2.512346923828125000e+03 3.281909704208374023e+00 1.000000000000000000e+00 1.623204467773437500e+03 1.042500000000000000e+02 4.625000000000000000e+01
0.000000000000000000e+00 1.846076923076923038e+02 5.865165328979492188e+01 -2.027862548828125000e+00 0.000000000000000000e+00 0.000000000000000000e+00 2.570220214843750000e+03 3.245894193649291992e+00 1.000000000000000000e+00 1.505399414062500000e+03 1.047500000000000000e+02 4.625000000000000000e+01
1.000000000000000000e+00 1.641384615384614847e+02 6.385419845581054688e+01 -2.269805908203125000e+00 0.000000000000000000e+00 0.000000000000000000e+00 2.620250000000000000e+03 3.270211696624755859e+00 1.000000000000000000e+00 1.419785888671875000e+03 1.062500000000000000e+02 4.625000000000000000e+01
0.000000000000000000e+00 1.644615384615384528e+02 6.521485900878906250e+01 -2.413085937500000000e+00 0.000000000000000000e+00 0.000000000000000000e+00 2.590545654296875000e+03 3.273312807083129883e+00 1.000000000000000000e+00 1.261781372070312500e+03 1.067500000000000000e+02 4.625000000000000000e+01
0.000000000000000000e+00 1.440076923076923379e+02 6.845150756835937500e+01 -3.211395263671875000e+00 9.999999776482582092e-03 0.000000000000000000e+00 2.564601074218750000e+03 2.800848007202148438e+00 1.000000000000000000e+00 1.426390258789062500e+03 1.087500000000000000e+02 4.625000000000000000e+01
0.000000000000000000e+00 1.465769230769230660e+02 6.979972839355468750e+01 -2.932617187500000000e+00 0.000000000000000000e+00 0.000000000000000000e+00 2.654452148437500000e+03 3.624632120132446289e+00 1.000000000000000000e+00 1.161093139648437500e+03 1.102500000000000000e+02 4.625000000000000000e+01
0.000000000000000000e+00 1.593846153846153015e+02 7.116113281250000000e+01 -2.484008789062500000e+00 0.000000000000000000e+00 0.000000000000000000e+00 2.808864746093750000e+03 3.650461673736572266e+00 1.000000000000000000e+00 1.152035278320312500e+03 1.112500000000000000e+02 4.625000000000000000e+01
1.000000000000000000e+00 1.651384615384615984e+02 6.999285125732421875e+01 -2.180877685546875000e+00 0.000000000000000000e+00 0.000000000000000000e+00 2.853092041015625000e+03 3.650891780853271484e+00 1.000000000000000000e+00 1.137518432617187500e+03 1.117500000000000000e+02 4.625000000000000000e+01
1.000000000000000000e+00 1.795000000000000284e+02 6.693887329101562500e+01 -1.610565185546875000e+00 0.000000000000000000e+00 0.000000000000000000e+00 2.894216308593750000e+03 3.626900672912597656e+00 1.000000000000000000e+00 1.064737426757812500e+03 1.127500000000000000e+02 4.625000000000000000e+01
0.000000000000000000e+00 1.881000000000000227e+02 7.078014373779296875e+01 -1.148162841796875000e+00 0.000000000000000000e+00 5.882352963089942932e-02 3.004958251953125000e+03 3.575230121612548828e+00 1.000000000000000000e+00 1.178369873046875000e+03 1.137500000000000000e+02 4.625000000000000000e+01
0.000000000000000000e+00 1.867153846153846075e+02 7.527892303466796875e+01 -9.169616699218750000e-01 0.000000000000000000e+00 0.000000000000000000e+00 3.043780517578125000e+03 3.555325984954833984e+00 1.000000000000000000e+00 1.131289672851562500e+03 1.142500000000000000e+02 4.625000000000000000e+01
1.000000000000000000e+00 1.876230769230770079e+02 8.031319427490234375e+01 -8.668823242187500000e-01 0.000000000000000000e+00 4.705882370471954346e-01 3.042806640625000000e+03 3.553909540176391602e+00 1.000000000000000000e+00 9.311193847656250000e+02 1.147500000000000000e+02 4.625000000000000000e+01
1.000000000000000000e+00 1.916076923076923038e+02 8.644426727294921875e+01 -8.771972656250000000e-01 0.000000000000000000e+00 8.823529481887817383e-01 3.036103271484375000e+03 3.509790420532226562e+00 1.000000000000000000e+00 9.107396240234375000e+02 1.152500000000000000e+02 4.625000000000000000e+01
1.000000000000000000e+00 2.025999999999999375e+02 9.113543701171875000e+01 -8.875122070312500000e-01 0.000000000000000000e+00 2.941176593303680420e-01 3.028694091796875000e+03 3.509180545806884766e+00 1.000000000000000000e+00 8.917271118164062500e+02 1.157500000000000000e+02 4.625000000000000000e+01
1.000000000000000000e+00 2.008076923076922640e+02 9.416842651367187500e+01 -8.978271484375000000e-01 0.000000000000000000e+00 1.235294103622436523e+00 3.025125244140625000e+03 3.579186439514160156e+00 1.000000000000000000e+00 8.702360839843750000e+02 1.162500000000000000e+02 4.625000000000000000e+01
0.000000000000000000e+00 2.140384615384617177e+02 9.775418853759765625e+01 -1.037475585937500000e+00 0.000000000000000000e+00 1.352941155433654785e+00 3.004854003906250000e+03 3.571593046188354492e+00 1.000000000000000000e+00 8.939041137695312500e+02 1.167500000000000000e+02 4.625000000000000000e+01
0.000000000000000000e+00 2.298307692307693060e+02 1.027955703735351562e+02 -1.177124023437500000e+00 0.000000000000000000e+00 1.176470637321472168e+00 2.982978515625000000e+03 3.450767517089843750e+00 1.000000000000000000e+00 8.871177978515625000e+02 1.172500000000000000e+02 4.625000000000000000e+01
1.000000000000000000e+00 2.468230769230768828e+02 1.095800552368164062e+02 -1.316772460937500000e+00 0.000000000000000000e+00 5.882352963089942932e-02 2.926433105468750000e+03 3.403254985809326172e+00 1.000000000000000000e+00 8.424928588867187500e+02 1.177500000000000000e+02 4.625000000000000000e+01
0.000000000000000000e+00 2.636384615384614563e+02 1.156569137573242188e+02 -1.385620117187500000e+00 9.999999776482582092e-03 5.882352963089942932e-02 2.918885498046875000e+03 3.365793943405151367e+00 1.000000000000000000e+00 9.481049804687500000e+02 1.182500000000000000e+02 4.625000000000000000e+01
4.000000000000000000e+00 3.147615384615385210e+02 1.373809509277343750e+02 -1.098449707031250000e+00 0.000000000000000000e+00 8.823529481887817383e-01 2.945025634765625000e+03 3.293742656707763672e+00 1.000000000000000000e+00 9.649984741210937500e+02 1.192500000000000000e+02 4.625000000000000000e+01
3.000000000000000000e+00 3.582615384615383505e+02 1.692192840576171875e+02 -6.949462890625000000e-01 0.000000000000000000e+00 0.000000000000000000e+00 2.897682128906250000e+03 3.223043203353881836e+00 1.000000000000000000e+00 7.871242675781250000e+02 1.202500000000000000e+02 4.625000000000000000e+01
3.300000000000000000e+01 3.591692307692306940e+02 1.723146514892578125e+02 -3.187255859375000000e-01 0.000000000000000000e+00 0.000000000000000000e+00 2.982193603515625000e+03 2.790583372116088867e+00 3.000000000000000000e+00 7.955560302734375000e+02 1.207500000000000000e+02 4.625000000000000000e+01
0.000000000000000000e+00 3.814846153846153243e+02 1.686374969482421875e+02 5.749511718750000000e-02 0.000000000000000000e+00 0.000000000000000000e+00 3.004871826171875000e+03 3.496677160263061523e+00 1.000000000000000000e+00 5.650280151367187500e+02 1.212500000000000000e+02 4.625000000000000000e+01
1.000000000000000000e+00 4.110692307692308987e+02 1.511571807861328125e+02 1.115386962890625000e+00 0.000000000000000000e+00 2.470588207244873047e+00 3.101319580078125000e+03 3.873475790023803711e+00 1.000000000000000000e+00 1.360078735351562500e+02 1.232500000000000000e+02 4.625000000000000000e+01
0.000000000000000000e+00 4.249384615384615245e+02 1.597539062500000000e+02 1.193298339843750000e+00 0.000000000000000000e+00 1.529411792755126953e+00 3.116120605468750000e+03 3.925316333770751953e+00 1.000000000000000000e+00 1.310305786132812500e+02 1.242500000000000000e+02 4.625000000000000000e+01
2.000000000000000000e+00 4.342769230769231967e+02 1.665164031982421875e+02 1.057556152343750000e+00 0.000000000000000000e+00 0.000000000000000000e+00 3.105321044921875000e+03 3.918233871459960938e+00 1.000000000000000000e+00 1.365087432861328125e+02 1.247500000000000000e+02 4.625000000000000000e+01
6.000000000000000000e+00 4.751923076923076792e+02 1.936594390869140625e+02 5.320129394531250000e-01 0.000000000000000000e+00 8.235294222831726074e-01 3.053888427734375000e+03 3.853822946548461914e+00 1.000000000000000000e+00 1.498219909667968750e+02 1.262500000000000000e+02 4.625000000000000000e+01
5.100000000000000000e+01 5.148615384615383164e+02 2.470368041992187500e+02 -3.243103027343750000e-01 9.999999776482582092e-03 0.000000000000000000e+00 2.949038574218750000e+03 9.136388301849365234e-01 4.000000000000000000e+00 3.513416137695312500e+02 1.282500000000000000e+02 4.625000000000000000e+01
5.500000000000000000e+01 5.148615384615384301e+02 2.551550445556640625e+02 -5.112304687500000000e-01 0.000000000000000000e+00 0.000000000000000000e+00 2.930550292968750000e+03 8.900688290596008301e-01 4.000000000000000000e+00 3.159662475585937500e+02 1.287500000000000000e+02 4.625000000000000000e+01
3.500000000000000000e+01 5.201923076923073950e+02 2.259996795654296875e+02 -6.782836914062500000e-01 9.999999776482582092e-03 4.705882370471954346e-01 2.871425292968750000e+03 3.430315256118774414e+00 3.000000000000000000e+00 1.750092010498046875e+02 1.297500000000000000e+02 4.625000000000000000e+01
4.200000000000000000e+01 5.314384615384619792e+02 2.107756195068359375e+02 -4.119262695312500000e-01 0.000000000000000000e+00 0.000000000000000000e+00 2.865708007812500000e+03 9.564975500106811523e-01 3.000000000000000000e+00 3.494234924316406250e+02 1.312500000000000000e+02 4.625000000000000000e+01
4.600000000000000000e+01 5.356846153846151992e+02 2.134635467529296875e+02 -3.263244628906250000e-01 0.000000000000000000e+00 2.941176593303680420e-01 2.868138671875000000e+03 1.679722189903259277e+00 4.000000000000000000e+00 3.601596984863281250e+02 1.317500000000000000e+02 4.625000000000000000e+01
8.000000000000000000e+00 5.890846153846149491e+02 2.408460845947265625e+02 -1.551208496093750000e-01 0.000000000000000000e+00 1.000000000000000000e+00 2.817892578125000000e+03 3.744652271270751953e+00 1.000000000000000000e+00 1.066841888427734375e+02 1.327500000000000000e+02 4.625000000000000000e+01
1.700000000000000000e+01 6.218153846153846871e+02 2.619828186035156250e+02 -7.385253906250000000e-02 0.000000000000000000e+00 2.941176593303680420e-01 2.813268554687500000e+03 2.965657472610473633e+00 3.000000000000000000e+00 8.797041320800781250e+01 1.332500000000000000e+02 4.625000000000000000e+01
5.100000000000000000e+01 6.519461538461540613e+02 2.708370666503906250e+02 -5.554199218750000000e-03 0.000000000000000000e+00 2.352941185235977173e-01 2.779107910156250000e+03 9.715775251388549805e-01 4.000000000000000000e+00 6.287611389160156250e+01 1.337500000000000000e+02 4.625000000000000000e+01
5.600000000000000000e+01 6.747538461538459842e+02 2.866569824218750000e+02 6.274414062500000000e-02 0.000000000000000000e+00 1.705882310867309570e+00 2.742743408203125000e+03 9.595329761505126953e-01 4.000000000000000000e+00 1.325343780517578125e+02 1.342500000000000000e+02 4.625000000000000000e+01
6.000000000000000000e+01 7.017384615384617064e+02 3.204083862304687500e+02 1.310424804687500000e-01 0.000000000000000000e+00 2.941176593303680420e-01 2.661382324218750000e+03 9.365693330764770508e-01 4.000000000000000000e+00 2.313175659179687500e+02 1.347500000000000000e+02 4.625000000000000000e+01
6.300000000000000000e+01 7.395923076923080544e+02 3.541213684082031250e+02 3.166198730468750000e-01 0.000000000000000000e+00 0.000000000000000000e+00 2.643153808593750000e+03 8.891873955726623535e-01 4.000000000000000000e+00 4.548480224609375000e+02 1.352500000000000000e+02 4.625000000000000000e+01
6.600000000000000000e+01 7.850461538461538566e+02 3.666988525390625000e+02 6.194763183593750000e-01 9.999999776482582092e-03 0.000000000000000000e+00 2.600092285156250000e+03 8.263987302780151367e-01 4.000000000000000000e+00 6.528715209960937500e+02 1.357500000000000000e+02 4.625000000000000000e+01
7.300000000000000000e+01 8.190307692307694651e+02 3.727911682128906250e+02 9.223327636718750000e-01 9.999999776482582092e-03 0.000000000000000000e+00 2.556528320312500000e+03 1.892115950584411621e+00 4.000000000000000000e+00 8.644995727539062500e+02 1.362500000000000000e+02 4.625000000000000000e+01
7.000000000000000000e+01 8.590076923076919684e+02 3.757880554199218750e+02 1.225189208984375000e+00 1.826464384794235229e-01 0.000000000000000000e+00 2.459196289062500000e+03 1.484256863594055176e+00 4.000000000000000000e+00 8.847498779296875000e+02 1.367500000000000000e+02 4.625000000000000000e+01
6.300000000000000000e+01 8.627846153846151083e+02 3.601564025878906250e+02 1.779296875000000000e+00 9.999999776482582092e-03 5.882353186607360840e-01 2.443548339843750000e+03 1.592318534851074219e+00 4.000000000000000000e+00 8.062523193359375000e+02 1.372500000000000000e+02 4.625000000000000000e+01
8.000000000000000000e+00 7.849307692307691013e+02 4.366080627441406250e+02 1.138342285156250000e+01 0.000000000000000000e+00 0.000000000000000000e+00 4.642422363281250000e+03 4.437337398529052734e+00 1.000000000000000000e+00 1.750290527343750000e+02 -7.500000000000000000e-01 4.675000000000000000e+01
2.800000000000000000e+01 7.103538461538464617e+02 3.748397521972656250e+02 9.654113769531250000e+00 0.000000000000000000e+00 0.000000000000000000e+00 4.268708984375000000e+03 4.397520065307617188e+00 3.000000000000000000e+00 1.309053802490234375e+02 7.500000000000000000e-01 4.675000000000000000e+01
1.400000000000000000e+01 7.289230769230769056e+02 3.868260803222656250e+02 9.274017333984375000e+00 0.000000000000000000e+00 0.000000000000000000e+00 4.175972167968750000e+03 4.376020908355712891e+00 3.000000000000000000e+00 9.950125122070312500e+01 1.250000000000000000e+00 4.675000000000000000e+01
1.200000000000000000e+01 7.628461538461536975e+02 3.824066772460937500e+02 8.893920898437500000e+00 0.000000000000000000e+00 2.941176593303680420e-01 4.083235351562500000e+03 4.325604915618896484e+00 3.000000000000000000e+00 1.662454681396484375e+02 1.750000000000000000e+00 4.675000000000000000e+01
5.400000000000000000e+01 7.640153846153843915e+02 3.763604736328125000e+02 8.491821289062500000e+00 0.000000000000000000e+00 8.823529481887817383e-01 3.975382568359375000e+03 4.306665897369384766e+00 4.000000000000000000e+00 1.837408599853515625e+02 2.250000000000000000e+00 4.675000000000000000e+01
5.500000000000000000e+01 7.524230769230766782e+02 3.284602966308593750e+02 7.672943115234375000e+00 0.000000000000000000e+00 0.000000000000000000e+00 3.749600097656250000e+03 4.292785644531250000e+00 4.000000000000000000e+00 2.394657897949218750e+02 3.250000000000000000e+00 4.675000000000000000e+01
2.800000000000000000e+01 7.863461538461543796e+02 3.266069946289062500e+02 7.263519287109375000e+00 0.000000000000000000e+00 0.000000000000000000e+00 3.636708740234375000e+03 4.243394851684570312e+00 3.000000000000000000e+00 2.403167724609375000e+02 3.750000000000000000e+00 4.675000000000000000e+01
3.200000000000000000e+01 1.055630769230769374e+03 5.546359863281250000e+02 5.371185302734375000e+00 0.000000000000000000e+00 0.000000000000000000e+00 3.099577880859375000e+03 3.941581249237060547e+00 3.000000000000000000e+00 5.544189453125000000e+02 5.750000000000000000e+00 4.675000000000000000e+01
7.100000000000000000e+01 1.350676923076923231e+03 6.290571899414062500e+02 4.719055175781250000e+00 0.000000000000000000e+00 0.000000000000000000e+00 2.928425537109375000e+03 3.609146118164062500e+00 4.000000000000000000e+00 9.448836669921875000e+02 6.250000000000000000e+00 4.675000000000000000e+01
5.500000000000000000e+01 1.227207692307692696e+03 5.243861694335937500e+02 4.066925048828125000e+00 0.000000000000000000e+00 0.000000000000000000e+00 2.757273437500000000e+03 3.637239933013916016e+00 4.000000000000000000e+00 6.428613891601562500e+02 6.750000000000000000e+00 4.675000000000000000e+01
2.100000000000000000e+01 1.395784615384614426e+03 4.755504150390625000e+02 3.414794921875000000e+00 0.000000000000000000e+00 0.000000000000000000e+00 2.586121337890625000e+03 3.438167333602905273e+00 3.000000000000000000e+00 8.215820312500000000e+02 7.250000000000000000e+00 4.675000000000000000e+01
5.500000000000000000e+01 1.601046153846153402e+03 5.051995239257812500e+02 2.786468505859375000e+00 0.000000000000000000e+00 0.000000000000000000e+00 2.403523437500000000e+03 2.504327774047851562e+00 4.000000000000000000e+00 1.288659057617187500e+03 7.750000000000000000e+00 4.675000000000000000e+01
7.000000000000000000e+00 2.019923076923077588e+03 6.140438232421875000e+02 2.181915283203125000e+00 0.000000000000000000e+00 0.000000000000000000e+00 2.209479736328125000e+03 2.156949043273925781e+00 1.000000000000000000e+00 1.596306762695312500e+03 8.250000000000000000e+00 4.675000000000000000e+01
5.200000000000000000e+01 2.313084615384615972e+03 5.264439086914062500e+02 9.728393554687500000e-01 0.000000000000000000e+00 0.000000000000000000e+00 1.821392333984375000e+03 1.508293390274047852e+00 4.000000000000000000e+00 1.298960327148437500e+03 9.250000000000000000e+00 4.675000000000000000e+01
4.600000000000000000e+01 1.481215384615385346e+03 3.508206176757812500e+02 1.239471435546875000e+00 0.000000000000000000e+00 0.000000000000000000e+00 1.935788452148437500e+03 2.154669523239135742e+00 4.000000000000000000e+00 1.809574462890625000e+03 1.125000000000000000e+01 4.675000000000000000e+01
1.000000000000000000e+01 1.537300000000000182e+03 4.361508789062500000e+02 1.669403076171875000e+00 0.000000000000000000e+00 0.000000000000000000e+00 2.046323730468750000e+03 1.424497246742248535e+00 3.000000000000000000e+00 1.452008300781250000e+03 1.175000000000000000e+01 4.675000000000000000e+01
1.400000000000000000e+01 1.591623076923076496e+03 4.023522949218750000e+02 2.099304199218750000e+00 0.000000000000000000e+00 0.000000000000000000e+00 2.156859130859375000e+03 1.177166461944580078e+00 3.000000000000000000e+00 1.557113525390625000e+03 1.225000000000000000e+01 4.675000000000000000e+01
4.200000000000000000e+01 1.611692307692307395e+03 4.552849731445312500e+02 2.529235839843750000e+00 9.999999776482582092e-03 0.000000000000000000e+00 2.267394287109375000e+03 1.554526925086975098e+00 3.000000000000000000e+00 1.622118286132812500e+03 1.275000000000000000e+01 4.675000000000000000e+01
6.300000000000000000e+01 1.705815384615384573e+03 5.135480957031250000e+02 3.001983642578125000e+00 0.000000000000000000e+00 0.000000000000000000e+00 2.396363037109375000e+03 1.498773455619812012e+00 4.000000000000000000e+00 1.264015747070312500e+03 1.325000000000000000e+01 4.675000000000000000e+01
6.200000000000000000e+01 1.655915384615384937e+03 4.770733947753906250e+02 3.603118896484375000e+00 0.000000000000000000e+00 0.000000000000000000e+00 2.580632080078125000e+03 2.042808771133422852e+00 4.000000000000000000e+00 1.282152099609375000e+03 1.375000000000000000e+01 4.675000000000000000e+01
7.200000000000000000e+01 1.375838461538461615e+03 3.628638916015625000e+02 4.204284667968750000e+00 0.000000000000000000e+00 0.000000000000000000e+00 2.764900878906250000e+03 2.541955709457397461e+00 4.000000000000000000e+00 7.650278930664062500e+02 1.425000000000000000e+01 4.675000000000000000e+01
5.800000000000000000e+01 1.188823076923076997e+03 4.055857543945312500e+02 4.805419921875000000e+00 0.000000000000000000e+00 0.000000000000000000e+00 2.949169921875000000e+03 3.672146320343017578e+00 4.000000000000000000e+00 6.978494873046875000e+02 1.475000000000000000e+01 4.675000000000000000e+01
4.800000000000000000e+01 9.516076923076919911e+02 4.230380554199218750e+02 5.319793701171875000e+00 0.000000000000000000e+00 0.000000000000000000e+00 3.114992187500000000e+03 3.831223249435424805e+00 4.000000000000000000e+00 4.030037841796875000e+02 1.525000000000000000e+01 4.675000000000000000e+01
4.400000000000000000e+01 8.635923076923077133e+02 3.855829162597656250e+02 5.747375488281250000e+00 0.000000000000000000e+00 0.000000000000000000e+00 3.262367919921875000e+03 4.098139286041259766e+00 3.000000000000000000e+00 2.769048461914062500e+02 1.575000000000000000e+01 4.675000000000000000e+01
3.500000000000000000e+01 7.644615384615383391e+02 3.307336730957031250e+02 6.174957275390625000e+00 0.000000000000000000e+00 0.000000000000000000e+00 3.409743652343750000e+03 4.172471523284912109e+00 3.000000000000000000e+00 2.752362060546875000e+02 1.625000000000000000e+01 4.675000000000000000e+01
7.100000000000000000e+01 8.991000000000001364e+02 2.990404968261718750e+02 6.011230468750000000e+00 0.000000000000000000e+00 5.882352963089942932e-02 3.448751708984375000e+03 3.756468772888183594e+00 4.000000000000000000e+00 1.218153808593750000e+03 2.275000000000000000e+01 4.675000000000000000e+01
2.100000000000000000e+01 9.052384615384611379e+02 3.014827575683593750e+02 5.667297363281250000e+00 0.000000000000000000e+00 0.000000000000000000e+00 3.375969238281250000e+03 3.689842700958251953e+00 3.000000000000000000e+00 6.543021850585937500e+02 2.325000000000000000e+01 4.675000000000000000e+01
6.000000000000000000e+00 7.244307692307692150e+02 2.870757751464843750e+02 4.913055419921875000e+00 0.000000000000000000e+00 0.000000000000000000e+00 3.221893798828125000e+03 3.757317543029785156e+00 1.000000000000000000e+00 3.867046508789062500e+02 2.475000000000000000e+01 4.675000000000000000e+01
7.100000000000000000e+01 8.372153846153846644e+02 2.781929626464843750e+02 4.939178466796875000e+00 0.000000000000000000e+00 0.000000000000000000e+00 3.234807128906250000e+03 2.225692272186279297e+00 4.000000000000000000e+00 1.155695922851562500e+03 2.525000000000000000e+01 4.675000000000000000e+01
5.600000000000000000e+01 7.924076923076922867e+02 3.041700134277343750e+02 4.965301513671875000e+00 0.000000000000000000e+00 0.000000000000000000e+00 3.247720703125000000e+03 3.304864168167114258e+00 4.000000000000000000e+00 1.282010375976562500e+03 2.575000000000000000e+01 4.675000000000000000e+01
7.000000000000000000e+01 7.090615384615389303e+02 3.101138916015625000e+02 4.991424560546875000e+00 0.000000000000000000e+00 0.000000000000000000e+00 3.260634277343750000e+03 3.507594347000122070e+00 4.000000000000000000e+00 9.624557495117187500e+02 2.625000000000000000e+01 4.675000000000000000e+01
5.500000000000000000e+01 5.250461538461539703e+02 2.670816345214843750e+02 5.389312744140625000e+00 0.000000000000000000e+00 5.882353186607360840e-01 3.366209472656250000e+03 3.957167625427246094e+00 4.000000000000000000e+00 3.594978332519531250e+02 2.675000000000000000e+01 4.675000000000000000e+01
2.000000000000000000e+00 4.412615384615383505e+02 2.272297210693359375e+02 8.909851074218750000e+00 0.000000000000000000e+00 2.882352828979492188e+00 4.316663574218750000e+03 4.186484336853027344e+00 1.000000000000000000e+00 4.733201599121093750e+01 3.375000000000000000e+01 4.675000000000000000e+01
2.000000000000000000e+00 5.247692307692304894e+02 2.980028686523437500e+02 7.525665283203125000e+00 0.000000000000000000e+00 2.882352828979492188e+00 4.013541503906250000e+03 4.307652950286865234e+00 1.000000000000000000e+00 7.208744812011718750e+01 4.125000000000000000e+01 4.675000000000000000e+01
5.000000000000000000e+00 4.238615384615383164e+02 2.348055725097656250e+02 7.212646484375000000e+00 0.000000000000000000e+00 3.294117689132690430e+00 4.040356445312500000e+03 4.291529178619384766e+00 1.000000000000000000e+00 1.554930572509765625e+02 4.325000000000000000e+01 4.675000000000000000e+01
1.000000000000000000e+00 3.979769230769230717e+02 2.317098693847656250e+02 7.451293945312500000e+00 0.000000000000000000e+00 1.647058844566345215e+00 4.109988281250000000e+03 4.292297363281250000e+00 1.000000000000000000e+00 1.233164901733398438e+02 4.375000000000000000e+01 4.675000000000000000e+01
1.000000000000000000e+00 3.745153846153846189e+02 2.222606811523437500e+02 7.689941406250000000e+00 0.000000000000000000e+00 1.705882310867309570e+00 4.179620117187500000e+03 4.303800106048583984e+00 1.000000000000000000e+00 1.403734893798828125e+02 4.425000000000000000e+01 4.675000000000000000e+01
0.000000000000000000e+00 3.267461538461537884e+02 2.237754364013671875e+02 3.735626220703125000e+00 0.000000000000000000e+00 2.529411792755126953e+00 3.331533691406250000e+03 4.025591850280761719e+00 1.000000000000000000e+00 4.188045959472656250e+02 8.175000000000000000e+01 4.675000000000000000e+01
1.000000000000000000e+00 3.007307692307691127e+02 1.687144775390625000e+02 3.711669921875000000e+00 0.000000000000000000e+00 2.117647171020507812e+00 3.240471435546875000e+03 3.914398193359375000e+00 1.000000000000000000e+00 5.596727905273437500e+02 8.275000000000000000e+01 4.675000000000000000e+01
4.000000000000000000e+00 2.862461538461538453e+02 1.651628723144531250e+02 3.546997070312500000e+00 0.000000000000000000e+00 5.882353186607360840e-01 3.165679443359375000e+03 3.934471607208251953e+00 1.000000000000000000e+00 6.739772338867187500e+02 8.325000000000000000e+01 4.675000000000000000e+01
1.000000000000000000e+00 2.946769230769227192e+02 1.510801239013671875e+02 3.382324218750000000e+00 0.000000000000000000e+00 4.705882370471954346e-01 3.090887695312500000e+03 3.681817293167114258e+00 1.000000000000000000e+00 7.906483764648437500e+02 8.375000000000000000e+01 4.675000000000000000e+01
0.000000000000000000e+00 1.191153846153846558e+02 1.071855468750000000e+02 -2.551330566406250000e+00 0.000000000000000000e+00 0.000000000000000000e+00 2.311183105468750000e+03 2.079233646392822266e+00 1.000000000000000000e+00 1.034259277343750000e+03 8.975000000000000000e+01 4.675000000000000000e+01
2.000000000000000000e+00 1.499769230769230433e+02 9.645330047607421875e+01 -3.159576416015625000e+00 0.000000000000000000e+00 0.000000000000000000e+00 2.252704101562500000e+03 2.578740358352661133e+00 1.000000000000000000e+00 1.556597412109375000e+03 9.025000000000000000e+01 4.675000000000000000e+01
1.000000000000000000e+00 2.456538461538460751e+02 7.896824645996093750e+01 -2.963531494140625000e+00 9.999999776482582092e-03 0.000000000000000000e+00 2.441836181640625000e+03 2.936987161636352539e+00 1.000000000000000000e+00 1.728113281250000000e+03 1.032500000000000000e+02 4.675000000000000000e+01
5.000000000000000000e+00 2.532461538461538453e+02 6.057297515869140625e+01 -2.708709716796875000e+00 9.999999776482582092e-03 0.000000000000000000e+00 2.499361083984375000e+03 2.954628467559814453e+00 1.000000000000000000e+00 1.825196044921875000e+03 1.037500000000000000e+02 4.675000000000000000e+01
1.000000000000000000e+00 2.238307692307692207e+02 5.584269714355468750e+01 -2.453857421875000000e+00 9.999999776482582092e-03 0.000000000000000000e+00 2.556885986328125000e+03 3.106561422348022461e+00 1.000000000000000000e+00 1.747792724609375000e+03 1.042500000000000000e+02 4.675000000000000000e+01
0.000000000000000000e+00 2.093769230769231626e+02 5.769694137573242188e+01 -2.199035644531250000e+00 0.000000000000000000e+00 0.000000000000000000e+00 2.614410644531250000e+03 3.180307388305664062e+00 1.000000000000000000e+00 1.501383544921875000e+03 1.047500000000000000e+02 4.675000000000000000e+01
0.000000000000000000e+00 1.978615384615383164e+02 6.513313293457031250e+01 -2.194519042968750000e+00 0.000000000000000000e+00 0.000000000000000000e+00 2.640763916015625000e+03 3.176417827606201172e+00 1.000000000000000000e+00 1.489939086914062500e+03 1.052500000000000000e+02 4.675000000000000000e+01
0.000000000000000000e+00 1.904153846153845961e+02 7.101679992675781250e+01 -2.440307617187500000e+00 0.000000000000000000e+00 0.000000000000000000e+00 2.635945800781250000e+03 3.165125370025634766e+00 1.000000000000000000e+00 1.313112915039062500e+03 1.057500000000000000e+02 4.675000000000000000e+01
1.000000000000000000e+00 1.856307692307693173e+02 7.477988433837890625e+01 -2.686096191406250000e+00 9.999999776482582092e-03 0.000000000000000000e+00 2.631127441406250000e+03 3.156264066696166992e+00 1.000000000000000000e+00 1.430257324218750000e+03 1.062500000000000000e+02 4.675000000000000000e+01
1.000000000000000000e+00 1.863153846153845450e+02 7.775167846679687500e+01 -2.931915283203125000e+00 9.999999776482582092e-03 0.000000000000000000e+00 2.626309082031250000e+03 3.157764673233032227e+00 1.000000000000000000e+00 1.419925903320312500e+03 1.067500000000000000e+02 4.675000000000000000e+01
0.000000000000000000e+00 1.921000000000000227e+02 7.851547241210937500e+01 -3.239074707031250000e+00 9.999999776482582092e-03 0.000000000000000000e+00 2.614326171875000000e+03 3.142977952957153320e+00 1.000000000000000000e+00 1.375773559570312500e+03 1.072500000000000000e+02 4.675000000000000000e+01
4.000000000000000000e+00 1.709692307692307622e+02 7.614567565917968750e+01 -3.566680908203125000e+00 9.999999776482582092e-03 0.000000000000000000e+00 2.599954833984375000e+03 3.139631986618041992e+00 1.000000000000000000e+00 1.268094848632812500e+03 1.077500000000000000e+02 4.675000000000000000e+01
0.000000000000000000e+00 1.623153846153845734e+02 7.413414764404296875e+01 -3.894317626953125000e+00 9.999999776482582092e-03 0.000000000000000000e+00 2.585583740234375000e+03 3.135106801986694336e+00 1.000000000000000000e+00 1.313004028320312500e+03 1.082500000000000000e+02 4.675000000000000000e+01
1.000000000000000000e+00 1.640923076923077133e+02 7.942310333251953125e+01 -4.145050048828125000e+00 9.999999776482582092e-03 0.000000000000000000e+00 2.600775146484375000e+03 3.223275184631347656e+00 1.000000000000000000e+00 1.212561767578125000e+03 1.092500000000000000e+02 4.675000000000000000e+01
1.000000000000000000e+00 1.760384615384614904e+02 8.245546722412109375e+01 -4.068145751953125000e+00 9.999999776482582092e-03 0.000000000000000000e+00 2.630337646484375000e+03 3.323418855667114258e+00 1.000000000000000000e+00 1.291720947265625000e+03 1.097500000000000000e+02 4.675000000000000000e+01
1.000000000000000000e+00 1.595692307692307850e+02 8.570934295654296875e+01 -3.991271972656250000e+00 0.000000000000000000e+00 0.000000000000000000e+00 2.659900390625000000e+03 3.524744033813476562e+00 1.000000000000000000e+00 1.233581298828125000e+03 1.102500000000000000e+02 4.675000000000000000e+01
0.000000000000000000e+00 1.725692307692306997e+02 8.708906555175781250e+01 -3.832397460937500000e+00 9.999999776482582092e-03 0.000000000000000000e+00 2.698564208984375000e+03 3.557435512542724609e+00 1.000000000000000000e+00 1.281678955078125000e+03 1.107500000000000000e+02 4.675000000000000000e+01
1.000000000000000000e+00 1.734000000000000625e+02 8.601079559326171875e+01 -3.427581787109375000e+00 9.999999776482582092e-03 2.941176593303680420e-01 2.764531494140625000e+03 2.642856121063232422e+00 1.000000000000000000e+00 1.230996093750000000e+03 1.112500000000000000e+02 4.675000000000000000e+01
0.000000000000000000e+00 1.969307692307691866e+02 7.100097656250000000e+01 -1.840911865234375000e+00 0.000000000000000000e+00 0.000000000000000000e+00 2.995945800781250000e+03 3.542792081832885742e+00 1.000000000000000000e+00 1.072855834960937500e+03 1.132500000000000000e+02 4.675000000000000000e+01
0.000000000000000000e+00 1.945923076923077133e+02 7.168839263916015625e+01 -1.457824707031250000e+00 0.000000000000000000e+00 2.941176593303680420e-01 3.040276367187500000e+03 3.539094209671020508e+00 1.000000000000000000e+00 9.334689941406250000e+02 1.137500000000000000e+02 4.675000000000000000e+01
0.000000000000000000e+00 1.880153846153846757e+02 7.446429443359375000e+01 -1.074737548828125000e+00 0.000000000000000000e+00 5.294117927551269531e-01 3.084606689453125000e+03 3.530683755874633789e+00 1.000000000000000000e+00 8.978817749023437500e+02 1.142500000000000000e+02 4.675000000000000000e+01
1.000000000000000000e+00 1.860692307692306997e+02 7.789315795898437500e+01 -9.510803222656250000e-01 0.000000000000000000e+00 0.000000000000000000e+00 3.084846435546875000e+03 2.891441106796264648e+00 1.000000000000000000e+00 8.084989624023437500e+02 1.147500000000000000e+02 4.675000000000000000e+01
0.000000000000000000e+00 1.930923076923076565e+02 8.112001800537109375e+01 -9.138793945312500000e-01 0.000000000000000000e+00 2.352941185235977173e-01 3.070389160156250000e+03 3.438316822052001953e+00 1.000000000000000000e+00 7.952261962890625000e+02 1.152500000000000000e+02 4.675000000000000000e+01
0.000000000000000000e+00 2.021846153846153697e+02 8.601047515869140625e+01 -8.766784667968750000e-01 0.000000000000000000e+00 0.000000000000000000e+00 3.055931884765625000e+03 3.502076387405395508e+00 1.000000000000000000e+00 7.124332275390625000e+02 1.157500000000000000e+02 4.675000000000000000e+01
1.000000000000000000e+00 2.166461538461538225e+02 9.652153778076171875e+01 -1.032379150390625000e+00 0.000000000000000000e+00 9.411764740943908691e-01 3.005041015625000000e+03 3.551343917846679688e+00 1.000000000000000000e+00 7.201843872070312500e+02 1.167500000000000000e+02 4.675000000000000000e+01
1.000000000000000000e+00 2.305615384615384755e+02 1.009821777343750000e+02 -1.225280761718750000e+00 0.000000000000000000e+00 7.647058963775634766e-01 2.968607177734375000e+03 3.496591091156005859e+00 1.000000000000000000e+00 7.542485961914062500e+02 1.172500000000000000e+02 4.675000000000000000e+01
7.000000000000000000e+00 3.645461538461537430e+02 1.812407684326171875e+02 -1.328125000000000000e+00 0.000000000000000000e+00 5.294117927551269531e-01 2.908979003906250000e+03 1.244724035263061523e+00 1.000000000000000000e+00 8.782879638671875000e+02 1.202500000000000000e+02 4.675000000000000000e+01
9.000000000000000000e+00 3.829923076923076906e+02 1.865418853759765625e+02 -9.899291992187500000e-01 9.999999776482582092e-03 0.000000000000000000e+00 2.941281494140625000e+03 8.371711373329162598e-01 1.000000000000000000e+00 7.191190795898437500e+02 1.207500000000000000e+02 4.675000000000000000e+01
1.000000000000000000e+00 3.976538461538461320e+02 1.744503631591796875e+02 -4.214477539062500000e-02 0.000000000000000000e+00 5.882352963089942932e-02 3.042770996093750000e+03 3.638494491577148438e+00 1.000000000000000000e+00 2.977278442382812500e+02 1.222500000000000000e+02 4.675000000000000000e+01
4.000000000000000000e+00 4.335846153846151765e+02 1.760967712402343750e+02 5.004577636718750000e-01 0.000000000000000000e+00 1.529411792755126953e+00 3.117009033203125000e+03 3.838068485260009766e+00 1.000000000000000000e+00 1.460042877197265625e+02 1.252500000000000000e+02 4.675000000000000000e+01
3.000000000000000000e+01 5.281153846153845279e+02 2.633170471191406250e+02 -5.577087402343750000e-01 0.000000000000000000e+00 2.941176593303680420e-01 2.917312744140625000e+03 8.896837830543518066e-01 3.000000000000000000e+00 3.044273071289062500e+02 1.282500000000000000e+02 4.675000000000000000e+01
6.400000000000000000e+01 5.291769230769231172e+02 2.830008544921875000e+02 -7.474365234375000000e-01 0.000000000000000000e+00 0.000000000000000000e+00 2.891272949218750000e+03 8.680853247642517090e-01 4.000000000000000000e+00 4.764247436523437500e+02 1.287500000000000000e+02 4.675000000000000000e+01
5.400000000000000000e+01 5.269538461538463707e+02 2.679577941894531250e+02 -9.371948242187500000e-01 9.999999776482582092e-03 0.000000000000000000e+00 2.865233154296875000e+03 8.671308159828186035e-01 4.000000000000000000e+00 6.113255004882812500e+02 1.292500000000000000e+02 4.675000000000000000e+01
1.900000000000000000e+01 5.728307692307691923e+02 2.238698883056640625e+02 -5.094604492187500000e-01 0.000000000000000000e+00 2.411764621734619141e+00 2.869880859375000000e+03 3.766424655914306641e+00 3.000000000000000000e+00 5.566964340209960938e+01 1.327500000000000000e+02 4.675000000000000000e+01
3.500000000000000000e+01 6.111307692307696016e+02 2.344859619140625000e+02 -4.530029296875000000e-01 0.000000000000000000e+00 2.000000000000000000e+00 2.851719238281250000e+03 1.762091279029846191e+00 3.000000000000000000e+00 1.230044784545898438e+02 1.332500000000000000e+02 4.675000000000000000e+01
5.000000000000000000e+01 6.391230769230768374e+02 2.331172332763671875e+02 -4.150695800781250000e-01 0.000000000000000000e+00 0.000000000000000000e+00 2.801614990234375000e+03 9.537496566772460938e-01 4.000000000000000000e+00 2.631033630371093750e+02 1.337500000000000000e+02 4.675000000000000000e+01
5.500000000000000000e+01 6.943384615384616154e+02 2.973133850097656250e+02 -3.392028808593750000e-01 0.000000000000000000e+00 0.000000000000000000e+00 2.701406494140625000e+03 9.235941767692565918e-01 4.000000000000000000e+00 1.297218017578125000e+02 1.347500000000000000e+02 4.675000000000000000e+01
6.800000000000000000e+01 7.242384615384618201e+02 3.493264160156250000e+02 -2.243957519531250000e-01 0.000000000000000000e+00 0.000000000000000000e+00 2.646259277343750000e+03 9.009917378425598145e-01 4.000000000000000000e+00 3.344063415527343750e+02 1.352500000000000000e+02 4.675000000000000000e+01
6.500000000000000000e+01 7.606000000000001364e+02 3.625606079101562500e+02 -3.271484375000000000e-02 0.000000000000000000e+00 0.000000000000000000e+00 2.586069091796875000e+03 8.483018279075622559e-01 4.000000000000000000e+00 2.790797424316406250e+02 1.357500000000000000e+02 4.675000000000000000e+01
6.400000000000000000e+01 7.895153846153845052e+02 3.585258483886718750e+02 1.589355468750000000e-01 0.000000000000000000e+00 0.000000000000000000e+00 2.525878906250000000e+03 7.973867058753967285e-01 4.000000000000000000e+00 6.375411376953125000e+02 1.362500000000000000e+02 4.675000000000000000e+01
7.600000000000000000e+01 8.222461538461539021e+02 3.513275451660156250e+02 3.506164550781250000e-01 2.333096116781234741e-01 0.000000000000000000e+00 2.465688720703125000e+03 1.411005854606628418e+00 4.000000000000000000e+00 7.541333618164062500e+02 1.367500000000000000e+02 4.675000000000000000e+01
6.200000000000000000e+01 8.322538461538456431e+02 3.329922180175781250e+02 9.020080566406250000e-01 1.342651844024658203e-01 5.882353186607360840e-01 2.425116699218750000e+03 1.553333878517150879e+00 4.000000000000000000e+00 6.899831542968750000e+02 1.372500000000000000e+02 4.675000000000000000e+01
5.000000000000000000e+01 8.464230769230772466e+02 3.058549804687500000e+02 1.573364257812500000e+00 9.999999776482582092e-03 2.941176593303680420e-01 2.391083984375000000e+03 1.711222171783447266e+00 4.000000000000000000e+00 9.057215576171875000e+02 1.377500000000000000e+02 4.675000000000000000e+01
1.400000000000000000e+01 8.437999999999999545e+02 3.963352050781250000e+02 1.229949951171875000e+01 0.000000000000000000e+00 0.000000000000000000e+00 4.786080566406250000e+03 4.501441478729248047e+00 3.000000000000000000e+00 3.313122940063476562e+01 -1.750000000000000000e+00 4.725000000000000000e+01
6.000000000000000000e+01 7.242846153846156767e+02 3.591669921875000000e+02 8.642883300781250000e+00 0.000000000000000000e+00 0.000000000000000000e+00 4.004037109375000000e+03 4.347462177276611328e+00 4.000000000000000000e+00 1.529150085449218750e+02 2.250000000000000000e+00 4.725000000000000000e+01
5.000000000000000000e+00 7.664923076923075769e+02 3.749824218750000000e+02 7.923736572265625000e+00 0.000000000000000000e+00 0.000000000000000000e+00 3.806064697265625000e+03 4.246287822723388672e+00 1.000000000000000000e+00 2.868327026367187500e+02 3.250000000000000000e+00 4.725000000000000000e+01
1.400000000000000000e+01 7.928000000000002956e+02 3.349511108398437500e+02 7.564147949218750000e+00 0.000000000000000000e+00 0.000000000000000000e+00 3.707078369140625000e+03 4.183040142059326172e+00 3.000000000000000000e+00 2.492081756591796875e+02 3.750000000000000000e+00 4.725000000000000000e+01
1.100000000000000000e+01 8.823923076923076678e+02 3.055837402343750000e+02 7.124298095703125000e+00 0.000000000000000000e+00 0.000000000000000000e+00 3.580077148437500000e+03 4.092582702636718750e+00 3.000000000000000000e+00 5.061963500976562500e+02 4.250000000000000000e+00 4.725000000000000000e+01
8.000000000000000000e+00 1.040615384615384301e+03 4.489963684082031250e+02 5.766021728515625000e+00 0.000000000000000000e+00 0.000000000000000000e+00 3.190714355468750000e+03 4.130629062652587891e+00 1.000000000000000000e+00 2.487741241455078125e+02 5.750000000000000000e+00 4.725000000000000000e+01
3.200000000000000000e+01 1.212569230769230671e+03 5.250840454101562500e+02 5.171081542968750000e+00 0.000000000000000000e+00 0.000000000000000000e+00 3.030277587890625000e+03 3.896466732025146484e+00 3.000000000000000000e+00 4.419736328125000000e+02 6.250000000000000000e+00 4.725000000000000000e+01
6.400000000000000000e+01 1.286323076923077451e+03 5.493992309570312500e+02 4.576171875000000000e+00 0.000000000000000000e+00 0.000000000000000000e+00 2.869841064453125000e+03 3.748486042022705078e+00 4.000000000000000000e+00 7.230123901367187500e+02 6.750000000000000000e+00 4.725000000000000000e+01
2.700000000000000000e+01 1.236384615384615472e+03 4.970369873046875000e+02 3.981262207031250000e+00 0.000000000000000000e+00 0.000000000000000000e+00 2.709404296875000000e+03 3.841525316238403320e+00 3.000000000000000000e+00 7.910664062500000000e+02 7.250000000000000000e+00 4.725000000000000000e+01
5.000000000000000000e+00 1.240315384615384119e+03 5.349714355468750000e+02 3.418365478515625000e+00 0.000000000000000000e+00 0.000000000000000000e+00 2.544809814453125000e+03 3.872391700744628906e+00 1.000000000000000000e+00 4.557750854492187500e+02 7.750000000000000000e+00 4.725000000000000000e+01
1.200000000000000000e+01 1.300661538461538612e+03 5.830213012695312500e+02 2.887542724609375000e+00 0.000000000000000000e+00 0.000000000000000000e+00 2.376057373046875000e+03 3.743762731552124023e+00 3.000000000000000000e+00 5.886846313476562500e+02 8.250000000000000000e+00 4.725000000000000000e+01
4.900000000000000000e+01 1.298738461538461934e+03 5.498684082031250000e+02 2.356689453125000000e+00 0.000000000000000000e+00 0.000000000000000000e+00 2.207304931640625000e+03 3.569968223571777344e+00 4.000000000000000000e+00 4.463034667968750000e+02 8.750000000000000000e+00 4.725000000000000000e+01
6.600000000000000000e+01 1.408446153846153720e+03 6.149951171875000000e+02 1.825836181640625000e+00 0.000000000000000000e+00 0.000000000000000000e+00 2.038552490234375000e+03 2.714289665222167969e+00 4.000000000000000000e+00 1.105220336914062500e+03 9.250000000000000000e+00 4.725000000000000000e+01
2.400000000000000000e+01 1.466799999999999272e+03 5.165126342773437500e+02 1.726776123046875000e+00 0.000000000000000000e+00 0.000000000000000000e+00 2.012313110351562500e+03 2.369756221771240234e+00 3.000000000000000000e+00 1.622857788085937500e+03 9.750000000000000000e+00 4.725000000000000000e+01
4.000000000000000000e+00 1.765176923076922776e+03 5.323830566406250000e+02 1.771606445312500000e+00 0.000000000000000000e+00 0.000000000000000000e+00 2.033577880859375000e+03 1.661326289176940918e+00 1.000000000000000000e+00 1.628705200195312500e+03 1.025000000000000000e+01 4.725000000000000000e+01
3.000000000000000000e+01 1.891123076923076724e+03 5.656282348632812500e+02 1.816467285156250000e+00 0.000000000000000000e+00 0.000000000000000000e+00 2.054842773437500000e+03 1.564266920089721680e+00 3.000000000000000000e+00 1.310364501953125000e+03 1.075000000000000000e+01 4.725000000000000000e+01
6.700000000000000000e+01 1.540900000000000318e+03 5.049341735839843750e+02 1.861297607421875000e+00 0.000000000000000000e+00 0.000000000000000000e+00 2.076107666015625000e+03 1.772340297698974609e+00 4.000000000000000000e+00 1.031349853515625000e+03 1.125000000000000000e+01 4.725000000000000000e+01
4.200000000000000000e+01 1.446115384615383846e+03 4.798008422851562500e+02 2.182067871093750000e+00 0.000000000000000000e+00 0.000000000000000000e+00 2.162570312500000000e+03 1.906892538070678711e+00 3.000000000000000000e+00 1.851140625000000000e+03 1.175000000000000000e+01 4.725000000000000000e+01
1.900000000000000000e+01 1.479792307692307077e+03 5.349923706054687500e+02 2.502838134765625000e+00 0.000000000000000000e+00 0.000000000000000000e+00 2.249033203125000000e+03 1.883826375007629395e+00 3.000000000000000000e+00 1.406739257812500000e+03 1.225000000000000000e+01 4.725000000000000000e+01
6.700000000000000000e+01 1.655184615384614972e+03 6.156843261718750000e+02 2.823608398437500000e+00 0.000000000000000000e+00 0.000000000000000000e+00 2.335495849609375000e+03 1.675617218017578125e+00 4.000000000000000000e+00 1.214061889648437500e+03 1.275000000000000000e+01 4.725000000000000000e+01
1.900000000000000000e+01 1.617730769230769511e+03 4.727697143554687500e+02 3.184783935546875000e+00 0.000000000000000000e+00 0.000000000000000000e+00 2.439191894531250000e+03 1.672904491424560547e+00 3.000000000000000000e+00 1.433058593750000000e+03 1.325000000000000000e+01 4.725000000000000000e+01
6.100000000000000000e+01 1.599061538461538930e+03 4.031203002929687500e+02 4.149414062500000000e+00 0.000000000000000000e+00 0.000000000000000000e+00 2.749985107421875000e+03 9.702463746070861816e-01 4.000000000000000000e+00 1.429553466796875000e+03 1.425000000000000000e+01 4.725000000000000000e+01
1.100000000000000000e+01 1.477330769230769192e+03 3.820179443359375000e+02 4.631713867187500000e+00 0.000000000000000000e+00 0.000000000000000000e+00 2.905381835937500000e+03 8.114250898361206055e-01 3.000000000000000000e+00 1.011350708007812500e+03 1.475000000000000000e+01 4.725000000000000000e+01
6.000000000000000000e+01 1.163307692307692378e+03 3.900632629394531250e+02 5.063262939453125000e+00 0.000000000000000000e+00 0.000000000000000000e+00 3.049846679687500000e+03 2.781177043914794922e+00 4.000000000000000000e+00 7.480476074218750000e+02 1.525000000000000000e+01 4.725000000000000000e+01
5.300000000000000000e+01 9.515538461538461661e+02 4.101289672851562500e+02 5.444030761718750000e+00 0.000000000000000000e+00 0.000000000000000000e+00 3.183379882812500000e+03 3.716059207916259766e+00 4.000000000000000000e+00 6.366553955078125000e+02 1.575000000000000000e+01 4.725000000000000000e+01
6.100000000000000000e+01 5.895923076923077133e+02 2.808903503417968750e+02 7.262756347656250000e+00 0.000000000000000000e+00 0.000000000000000000e+00 3.757221679687500000e+03 4.235946655273437500e+00 4.000000000000000000e+00 9.836131286621093750e+01 1.925000000000000000e+01 4.725000000000000000e+01
6.800000000000000000e+01 8.840923076923077133e+02 3.213593139648437500e+02 4.879486083984375000e+00 0.000000000000000000e+00 0.000000000000000000e+00 3.192104736328125000e+03 2.906621932983398438e+00 4.000000000000000000e+00 7.833416748046875000e+02 2.475000000000000000e+01 4.725000000000000000e+01
6.800000000000000000e+01 9.227769230769224578e+02 3.112331237792968750e+02 4.889862060546875000e+00 0.000000000000000000e+00 0.000000000000000000e+00 3.204618896484375000e+03 3.208360910415649414e+00 4.000000000000000000e+00 1.267749633789062500e+03 2.525000000000000000e+01 4.725000000000000000e+01
7.400000000000000000e+01 8.100615384615387029e+02 3.205855712890625000e+02 4.900207519531250000e+00 0.000000000000000000e+00 0.000000000000000000e+00 3.217132812500000000e+03 3.358105182647705078e+00 4.000000000000000000e+00 9.675618896484375000e+02 2.575000000000000000e+01 4.725000000000000000e+01
1.000000000000000000e+00 4.169538461538461434e+02 2.230711822509765625e+02 6.989776611328125000e+00 0.000000000000000000e+00 3.176470518112182617e+00 4.002239746093750000e+03 4.269878387451171875e+00 1.000000000000000000e+00 7.584197235107421875e+01 4.325000000000000000e+01 4.725000000000000000e+01
1.000000000000000000e+00 3.933692307692311374e+02 2.201959533691406250e+02 7.183044433593750000e+00 0.000000000000000000e+00 2.117647171020507812e+00 4.063232666015625000e+03 4.269695281982421875e+00 1.000000000000000000e+00 1.034126663208007812e+02 4.375000000000000000e+01 4.725000000000000000e+01
1.000000000000000000e+00 3.672461538461537884e+02 2.156003417968750000e+02 7.376342773437500000e+00 0.000000000000000000e+00 2.000000000000000000e+00 4.124225585937500000e+03 4.278036117553710938e+00 1.000000000000000000e+00 1.196391143798828125e+02 4.425000000000000000e+01 4.725000000000000000e+01
0.000000000000000000e+00 1.705846153846152617e+02 9.208710479736328125e+01 5.381317138671875000e+00 0.000000000000000000e+00 5.882353186607360840e-01 4.014538574218750000e+03 4.167621612548828125e+00 1.000000000000000000e+00 1.936074218750000000e+02 5.975000000000000000e+01 4.725000000000000000e+01
0.000000000000000000e+00 1.332384615384615358e+02 7.914366149902343750e+01 5.871337890625000000e+00 0.000000000000000000e+00 0.000000000000000000e+00 4.138195800781250000e+03 4.252946853637695312e+00 1.000000000000000000e+00 8.666153717041015625e+01 6.325000000000000000e+01 4.725000000000000000e+01
4.000000000000000000e+00 2.055076923076922526e+02 1.109718093872070312e+02 3.179901123046875000e+00 0.000000000000000000e+00 1.588235259056091309e+00 3.505960449218750000e+03 4.005335330963134766e+00 1.000000000000000000e+00 5.073599548339843750e+02 7.075000000000000000e+01 4.725000000000000000e+01
1.000000000000000000e+00 2.699307692307692719e+02 8.629096984863281250e+01 3.386199951171875000e+00 0.000000000000000000e+00 0.000000000000000000e+00 3.533072753906250000e+03 3.900509119033813477e+00 1.000000000000000000e+00 5.883683471679687500e+02 7.725000000000000000e+01 4.725000000000000000e+01
0.000000000000000000e+00 3.197538461538463821e+02 1.092981948852539062e+02 2.795867919921875000e+00 0.000000000000000000e+00 0.000000000000000000e+00 3.403627441406250000e+03 2.043286323547363281e+00 1.000000000000000000e+00 5.495748291015625000e+02 7.875000000000000000e+01 4.725000000000000000e+01
0.000000000000000000e+00 3.592846153846152220e+02 2.226462249755859375e+02 2.756286621093750000e+00 0.000000000000000000e+00 1.705882310867309570e+00 3.252943603515625000e+03 3.859557151794433594e+00 1.000000000000000000e+00 6.603595581054687500e+02 8.075000000000000000e+01 4.725000000000000000e+01
1.100000000000000000e+01 3.565153846153843915e+02 2.623277587890625000e+02 2.836425781250000000e+00 0.000000000000000000e+00 5.294117927551269531e-01 3.166321044921875000e+03 2.565338611602783203e+00 3.000000000000000000e+00 1.410557617187500000e+03 8.175000000000000000e+01 4.725000000000000000e+01
1.000000000000000000e+00 3.380769230769232081e+02 1.645518341064453125e+02 2.256683349609375000e+00 0.000000000000000000e+00 5.294117927551269531e-01 2.872460205078125000e+03 3.374431371688842773e+00 1.000000000000000000e+00 1.411756225585937500e+03 8.375000000000000000e+01 4.725000000000000000e+01
1.000000000000000000e+00 3.252615384615385778e+02 1.320165100097656250e+02 2.000762939453125000e+00 0.000000000000000000e+00 7.058823704719543457e-01 2.780902587890625000e+03 3.425611495971679688e+00 1.000000000000000000e+00 1.064819824218750000e+03 8.425000000000000000e+01 4.725000000000000000e+01
1.000000000000000000e+00 1.764538461538461718e+02 8.968138885498046875e+01 -2.704956054687500000e+00 0.000000000000000000e+00 0.000000000000000000e+00 2.151013427734375000e+03 3.449029684066772461e+00 1.000000000000000000e+00 5.268439941406250000e+02 8.775000000000000000e+01 4.725000000000000000e+01
5.000000000000000000e+00 1.597692307692308304e+02 9.871757507324218750e+01 -3.477844238281250000e+00 0.000000000000000000e+00 2.352941185235977173e-01 2.073114990234375000e+03 3.139406681060791016e+00 1.000000000000000000e+00 5.857438964843750000e+02 8.825000000000000000e+01 4.725000000000000000e+01
2.000000000000000000e+00 1.506230769230769511e+02 1.159962310791015625e+02 -4.453338623046875000e+00 0.000000000000000000e+00 0.000000000000000000e+00 2.020818847656250000e+03 2.996846914291381836e+00 1.000000000000000000e+00 1.299311157226562500e+03 8.925000000000000000e+01 4.725000000000000000e+01
5.000000000000000000e+00 1.731307692307692605e+02 1.112149658203125000e+02 -4.941101074218750000e+00 9.999999776482582092e-03 0.000000000000000000e+00 1.994670776367187500e+03 2.938691139221191406e+00 1.000000000000000000e+00 1.505022705078125000e+03 8.975000000000000000e+01 4.725000000000000000e+01
1.000000000000000000e+00 1.461384615384616552e+02 6.170798110961914062e+01 -5.599761962890625000e+00 9.999999776482582092e-03 0.000000000000000000e+00 1.762539672851562500e+03 1.664934515953063965e+00 1.000000000000000000e+00 1.695015625000000000e+03 9.525000000000000000e+01 4.725000000000000000e+01
1.100000000000000000e+01 2.729153846153847098e+02 1.283483428955078125e+02 -5.918823242187500000e+00 3.159684538841247559e-01 4.705882370471954346e-01 1.902361083984375000e+03 2.409651756286621094e+00 3.000000000000000000e+00 1.950475219726562500e+03 1.012500000000000000e+02 4.725000000000000000e+01
1.000000000000000000e+01 2.687230769230769170e+02 1.242344665527343750e+02 -5.212951660156250000e+00 1.921920478343963623e-01 7.647058963775634766e-01 2.010601196289062500e+03 2.646532773971557617e+00 3.000000000000000000e+00 1.815200683593750000e+03 1.017500000000000000e+02 4.725000000000000000e+01
1.000000000000000000e+00 2.484615384615385665e+02 5.884773254394531250e+01 -2.939666748046875000e+00 0.000000000000000000e+00 0.000000000000000000e+00 2.380212890625000000e+03 3.064933776855468750e+00 1.000000000000000000e+00 1.314737548828125000e+03 1.037500000000000000e+02 4.725000000000000000e+01
1.000000000000000000e+00 2.483461538461537828e+02 5.704140853881835938e+01 -2.673889160156250000e+00 9.999999776482582092e-03 0.000000000000000000e+00 2.437773925781250000e+03 3.059632301330566406e+00 1.000000000000000000e+00 1.471942382812500000e+03 1.042500000000000000e+02 4.725000000000000000e+01
2.000000000000000000e+00 2.298692307692308532e+02 6.272383117675781250e+01 -2.408142089843750000e+00 9.999999776482582092e-03 2.941176593303680420e-01 2.495335205078125000e+03 3.083420515060424805e+00 1.000000000000000000e+00 1.474418457031250000e+03 1.047500000000000000e+02 4.725000000000000000e+01
0.000000000000000000e+00 2.227999999999999261e+02 7.255179595947265625e+01 -2.409088134765625000e+00 0.000000000000000000e+00 0.000000000000000000e+00 2.519520996093750000e+03 3.086356401443481445e+00 1.000000000000000000e+00 1.135500610351562500e+03 1.052500000000000000e+02 4.725000000000000000e+01
1.000000000000000000e+00 2.177384615384615927e+02 8.097644042968750000e+01 -2.676727294921875000e+00 9.999999776482582092e-03 0.000000000000000000e+00 2.510331787109375000e+03 3.087886571884155273e+00 1.000000000000000000e+00 1.235308593750000000e+03 1.057500000000000000e+02 4.725000000000000000e+01
1.000000000000000000e+00 2.165538461538459671e+02 8.753993225097656250e+01 -2.944396972656250000e+00 9.999999776482582092e-03 0.000000000000000000e+00 2.501142578125000000e+03 3.077965974807739258e+00 1.000000000000000000e+00 1.364386230468750000e+03 1.062500000000000000e+02 4.725000000000000000e+01
2.000000000000000000e+00 2.031999999999999602e+02 9.003104400634765625e+01 -3.212036132812500000e+00 1.208322644233703613e-01 0.000000000000000000e+00 2.491953125000000000e+03 3.058434724807739258e+00 1.000000000000000000e+00 1.626278686523437500e+03 1.067500000000000000e+02 4.725000000000000000e+01
2.000000000000000000e+00 2.229769230769230717e+02 9.046715545654296875e+01 -3.582000732421875000e+00 1.164719313383102417e-01 0.000000000000000000e+00 2.473770996093750000e+03 3.045274972915649414e+00 1.000000000000000000e+00 1.503944824218750000e+03 1.072500000000000000e+02 4.725000000000000000e+01
0.000000000000000000e+00 2.311230769230768942e+02 8.656907653808593750e+01 -4.390075683593750000e+00 1.557797789573669434e-01 2.941176593303680420e-01 2.431411376953125000e+03 3.038858890533447266e+00 1.000000000000000000e+00 1.494244140625000000e+03 1.082500000000000000e+02 4.725000000000000000e+01
1.000000000000000000e+00 2.323230769230769113e+02 8.622546386718750000e+01 -4.794128417968750000e+00 9.999999776482582092e-03 0.000000000000000000e+00 2.410231445312500000e+03 3.056164503097534180e+00 1.000000000000000000e+00 1.360112426757812500e+03 1.087500000000000000e+02 4.725000000000000000e+01
0.000000000000000000e+00 2.250461538461539135e+02 8.871733093261718750e+01 -4.726654052734375000e+00 9.999999776482582092e-03 4.705882370471954346e-01 2.438319091796875000e+03 3.130057334899902344e+00 1.000000000000000000e+00 1.293493041992187500e+03 1.092500000000000000e+02 4.725000000000000000e+01
1.000000000000000000e+00 2.053153846153845734e+02 9.068136596679687500e+01 -4.659179687500000000e+00 9.999999776482582092e-03 0.000000000000000000e+00 2.466406738281250000e+03 3.231702327728271484e+00 1.000000000000000000e+00 1.193348999023437500e+03 1.097500000000000000e+02 4.725000000000000000e+01
2.000000000000000000e+00 2.066615384615384983e+02 9.297047424316406250e+01 -4.591705322265625000e+00 9.999999776482582092e-03 0.000000000000000000e+00 2.494494384765625000e+03 3.226725816726684570e+00 1.000000000000000000e+00 1.143797241210937500e+03 1.102500000000000000e+02 4.725000000000000000e+01
1.000000000000000000e+00 2.115615384615383334e+02 9.425539398193359375e+01 -4.436065673828125000e+00 9.999999776482582092e-03 0.000000000000000000e+00 2.534762939453125000e+03 3.235063076019287109e+00 1.000000000000000000e+00 1.097808471679687500e+03 1.107500000000000000e+02 4.725000000000000000e+01
1.000000000000000000e+00 2.204076923076924572e+02 8.769610595703125000e+01 -2.728973388671875000e+00 9.999999776482582092e-03 0.000000000000000000e+00 2.834335205078125000e+03 3.310335636138916016e+00 1.000000000000000000e+00 1.271828369140625000e+03 1.127500000000000000e+02 4.725000000000000000e+01
1.000000000000000000e+00 2.126999999999999318e+02 8.179007720947265625e+01 -2.255493164062500000e+00 9.999999776482582092e-03 5.294117927551269531e-01 2.895804687500000000e+03 3.360574007034301758e+00 1.000000000000000000e+00 1.087031738281250000e+03 1.132500000000000000e+02 4.725000000000000000e+01
1.000000000000000000e+00 2.128230769230770818e+02 8.017127227783203125e+01 -1.782012939453125000e+00 0.000000000000000000e+00 5.882353186607360840e-01 2.957274169921875000e+03 3.399521589279174805e+00 1.000000000000000000e+00 9.862775878906250000e+02 1.137500000000000000e+02 4.725000000000000000e+01
0.000000000000000000e+00 1.895615384615384755e+02 8.127496337890625000e+01 -1.128936767578125000e+00 0.000000000000000000e+00 2.941176593303680420e-01 3.031872802734375000e+03 3.461603403091430664e+00 1.000000000000000000e+00 8.163317871093750000e+02 1.147500000000000000e+02 4.725000000000000000e+01
0.000000000000000000e+00 1.977538461538462400e+02 8.147475433349609375e+01 -1.047271728515625000e+00 0.000000000000000000e+00 0.000000000000000000e+00 3.028888671875000000e+03 3.478063106536865234e+00 1.000000000000000000e+00 7.869811401367187500e+02 1.152500000000000000e+02 4.725000000000000000e+01
0.000000000000000000e+00 1.964999999999999716e+02 8.399212646484375000e+01 -9.656372070312500000e-01 0.000000000000000000e+00 2.941176593303680420e-01 3.025904541015625000e+03 3.531153202056884766e+00 1.000000000000000000e+00 8.103488769531250000e+02 1.157500000000000000e+02 4.725000000000000000e+01
0.000000000000000000e+00 2.077076923076923549e+02 9.027882385253906250e+01 -8.839721679687500000e-01 0.000000000000000000e+00 3.529411852359771729e-01 3.022920410156250000e+03 3.534018278121948242e+00 1.000000000000000000e+00 6.376546020507812500e+02 1.162500000000000000e+02 4.725000000000000000e+01
0.000000000000000000e+00 2.217999999999999261e+02 9.465831756591796875e+01 -1.111145019531250000e+00 0.000000000000000000e+00 7.058823704719543457e-01 2.982352294921875000e+03 3.521703004837036133e+00 1.000000000000000000e+00 6.742365112304687500e+02 1.167500000000000000e+02 4.725000000000000000e+01
1.000000000000000000e+00 2.430076923076923094e+02 1.058611145019531250e+02 -1.565460205078125000e+00 0.000000000000000000e+00 7.647058963775634766e-01 2.901216064453125000e+03 3.516047000885009766e+00 1.000000000000000000e+00 6.758357543945312500e+02 1.177500000000000000e+02 4.725000000000000000e+01
0.000000000000000000e+00 2.534076923076922867e+02 1.167707977294921875e+02 -1.760345458984375000e+00 0.000000000000000000e+00 1.294117689132690430e+00 2.866161621093750000e+03 3.427340984344482422e+00 1.000000000000000000e+00 7.087097778320312500e+02 1.182500000000000000e+02 4.725000000000000000e+01
3.000000000000000000e+00 3.134076923076921730e+02 1.459469146728515625e+02 -1.956542968750000000e+00 9.999999776482582092e-03 1.705882310867309570e+00 2.829133789062500000e+03 1.688156247138977051e+00 1.000000000000000000e+00 9.155288085937500000e+02 1.192500000000000000e+02 4.725000000000000000e+01
1.100000000000000000e+01 3.529923076923074063e+02 1.735797729492187500e+02 -2.054656982421875000e+00 1.180538237094879150e-01 2.058823585510253906e+00 2.810619873046875000e+03 1.606413722038269043e+00 3.000000000000000000e+00 1.091474243164062500e+03 1.197500000000000000e+02 4.725000000000000000e+01
3.600000000000000000e+01 3.941307692307689194e+02 1.905660400390625000e+02 -1.688171386718750000e+00 1.696033477783203125e-01 0.000000000000000000e+00 2.841223144531250000e+03 1.012977242469787598e+00 3.000000000000000000e+00 1.118646850585937500e+03 1.207500000000000000e+02 4.725000000000000000e+01
3.400000000000000000e+01 4.008307692307690218e+02 1.874458923339843750e+02 -1.411132812500000000e+00 9.999999776482582092e-03 0.000000000000000000e+00 2.867796386718750000e+03 8.374642133712768555e-01 3.000000000000000000e+00 7.963114624023437500e+02 1.212500000000000000e+02 4.725000000000000000e+01
4.000000000000000000e+00 4.033384615384615586e+02 1.862997131347656250e+02 -1.134094238281250000e+00 0.000000000000000000e+00 5.882352963089942932e-02 2.894369873046875000e+03 1.553950905799865723e+00 1.000000000000000000e+00 8.316968383789062500e+02 1.217500000000000000e+02 4.725000000000000000e+01
2.000000000000000000e+00 4.156230769230770079e+02 1.668082885742187500e+02 -7.687377929687500000e-02 0.000000000000000000e+00 2.941176593303680420e-01 3.045780029296875000e+03 3.850336790084838867e+00 1.000000000000000000e+00 1.440016937255859375e+02 1.237500000000000000e+02 4.725000000000000000e+01
8.000000000000000000e+00 4.257076923076920707e+02 1.681125030517578125e+02 -8.435058593750000000e-02 0.000000000000000000e+00 1.000000000000000000e+00 3.041605468750000000e+03 3.239091157913208008e+00 1.000000000000000000e+00 1.436596984863281250e+02 1.242500000000000000e+02 4.725000000000000000e+01
7.000000000000000000e+00 4.505153846153846189e+02 1.966385955810546875e+02 -1.388854980468750000e-01 0.000000000000000000e+00 0.000000000000000000e+00 3.022143066406250000e+03 2.416295528411865234e+00 1.000000000000000000e+00 2.333494720458984375e+02 1.257500000000000000e+02 4.725000000000000000e+01
3.500000000000000000e+01 5.205538461538460524e+02 2.424213256835937500e+02 -7.040100097656250000e-01 0.000000000000000000e+00 1.529411792755126953e+00 2.897306152343750000e+03 9.405127763748168945e-01 3.000000000000000000e+00 2.282819824218750000e+02 1.277500000000000000e+02 4.725000000000000000e+01
4.700000000000000000e+01 5.295923076923079407e+02 2.636534423828125000e+02 -8.832702636718750000e-01 0.000000000000000000e+00 0.000000000000000000e+00 2.871135986328125000e+03 9.046494960784912109e-01 4.000000000000000000e+00 3.391174316406250000e+02 1.282500000000000000e+02 4.725000000000000000e+01
3.500000000000000000e+01 5.464461538461541750e+02 2.803387756347656250e+02 -1.062561035156250000e+00 0.000000000000000000e+00 0.000000000000000000e+00 2.844965820312500000e+03 8.628974556922912598e-01 3.000000000000000000e+00 4.326203308105468750e+02 1.287500000000000000e+02 4.725000000000000000e+01
5.100000000000000000e+01 5.575769230769230944e+02 2.699322814941406250e+02 -1.241821289062500000e+00 9.999999776482582092e-03 0.000000000000000000e+00 2.818795654296875000e+03 8.143156766891479492e-01 4.000000000000000000e+00 2.449290161132812500e+02 1.292500000000000000e+02 4.725000000000000000e+01
5.600000000000000000e+01 5.555153846153846189e+02 2.595541687011718750e+02 -1.257720947265625000e+00 9.999999776482582092e-03 0.000000000000000000e+00 2.813375000000000000e+03 8.284906744956970215e-01 4.000000000000000000e+00 5.882393188476562500e+02 1.297500000000000000e+02 4.725000000000000000e+01
8.000000000000000000e+00 5.101692307692307509e+02 2.009790954589843750e+02 -1.180633544921875000e+00 0.000000000000000000e+00 1.117647051811218262e+00 2.816367187500000000e+03 3.730734348297119141e+00 1.000000000000000000e+00 6.933667755126953125e+01 1.307500000000000000e+02 4.725000000000000000e+01
1.100000000000000000e+01 5.356384615384612289e+02 2.127139739990234375e+02 -1.084655761718750000e+00 0.000000000000000000e+00 8.823529481887817383e-01 2.793235839843750000e+03 3.760547637939453125e+00 3.000000000000000000e+00 1.794996032714843750e+02 1.322500000000000000e+02 4.725000000000000000e+01
2.200000000000000000e+01 5.640384615384615472e+02 2.176396179199218750e+02 -1.055938720703125000e+00 0.000000000000000000e+00 1.000000000000000000e+00 2.780922119140625000e+03 3.743603467941284180e+00 3.000000000000000000e+00 5.716331863403320312e+01 1.327500000000000000e+02 4.725000000000000000e+01
1.100000000000000000e+01 5.940999999999999091e+02 2.205797882080078125e+02 -1.029815673828125000e+00 0.000000000000000000e+00 7.058823704719543457e-01 2.760254150390625000e+03 3.716066837310791016e+00 3.000000000000000000e+00 5.083524322509765625e+01 1.332500000000000000e+02 4.725000000000000000e+01
2.100000000000000000e+01 6.231384615384613426e+02 2.214262390136718750e+02 -1.011535644531250000e+00 0.000000000000000000e+00 2.294117689132690430e+00 2.714523193359375000e+03 2.971838712692260742e+00 3.000000000000000000e+00 4.601616287231445312e+01 1.337500000000000000e+02 4.725000000000000000e+01
2.600000000000000000e+01 6.573230769230769965e+02 2.303684082031250000e+02 -9.932250976562500000e-01 0.000000000000000000e+00 1.941176414489746094e+00 2.668791992187500000e+03 9.483283162117004395e-01 3.000000000000000000e+00 7.309923553466796875e+01 1.342500000000000000e+02 4.725000000000000000e+01
6.700000000000000000e+01 6.947000000000000455e+02 2.750130615234375000e+02 -9.749450683593750000e-01 0.000000000000000000e+00 1.058823585510253906e+00 2.623061035156250000e+03 9.069100022315979004e-01 4.000000000000000000e+00 3.941623840332031250e+02 1.347500000000000000e+02 4.725000000000000000e+01
6.700000000000000000e+01 6.972230769230766327e+02 3.254769592285156250e+02 -8.900451660156250000e-01 0.000000000000000000e+00 6.470588445663452148e-01 2.572382080078125000e+03 8.981280922889709473e-01 4.000000000000000000e+00 2.084325866699218750e+02 1.352500000000000000e+02 4.725000000000000000e+01
6.500000000000000000e+01 7.387923076923075314e+02 3.507120361328125000e+02 -7.385559082031250000e-01 9.999999776482582092e-03 0.000000000000000000e+00 2.516755859375000000e+03 8.587099909782409668e-01 4.000000000000000000e+00 3.928532714843750000e+02 1.357500000000000000e+02 4.725000000000000000e+01
6.600000000000000000e+01 7.684846153846153811e+02 3.599102172851562500e+02 -5.870361328125000000e-01 9.999999776482582092e-03 0.000000000000000000e+00 2.461129394531250000e+03 9.202357530593872070e-01 4.000000000000000000e+00 6.956859741210937500e+02 1.362500000000000000e+02 4.725000000000000000e+01
7.200000000000000000e+01 8.135230769230773831e+02 3.568103332519531250e+02 -4.355468750000000000e-01 1.452586650848388672e-01 0.000000000000000000e+00 2.405502929687500000e+03 1.417208313941955566e+00 4.000000000000000000e+00 1.012522338867187500e+03 1.367500000000000000e+02 4.725000000000000000e+01
5.700000000000000000e+01 8.199692307692311033e+02 3.411214599609375000e+02 2.655029296875000000e-02 1.892883181571960449e-01 0.000000000000000000e+00 2.365445800781250000e+03 1.609428882598876953e+00 4.000000000000000000e+00 9.849805908203125000e+02 1.372500000000000000e+02 4.725000000000000000e+01
7.300000000000000000e+01 8.322000000000005002e+02 3.166502990722656250e+02 5.921630859375000000e-01 1.548598259687423706e-01 0.000000000000000000e+00 2.330578369140625000e+03 1.338719487190246582e+00 4.000000000000000000e+00 7.916571044921875000e+02 1.377500000000000000e+02 4.725000000000000000e+01
7.200000000000000000e+01 8.133307692307693060e+02 3.110200195312500000e+02 1.157775878906250000e+00 0.000000000000000000e+00 0.000000000000000000e+00 2.295710937500000000e+03 7.246295809745788574e-01 4.000000000000000000e+00 3.410537414550781250e+02 1.382500000000000000e+02 4.725000000000000000e+01
7.200000000000000000e+01 8.438230769230769965e+02 3.038788146972656250e+02 7.027679443359375000e+00 0.000000000000000000e+00 1.000000000000000000e+00 3.533092285156250000e+03 4.124000072479248047e+00 4.000000000000000000e+00 3.720969848632812500e+02 4.750000000000000000e+00 4.775000000000000000e+01
7.000000000000000000e+00 8.992769230769225715e+02 3.260323486328125000e+02 6.609161376953125000e+00 0.000000000000000000e+00 0.000000000000000000e+00 3.410914550781250000e+03 4.105125427246093750e+00 1.000000000000000000e+00 3.883735351562500000e+02 5.250000000000000000e+00 4.775000000000000000e+01
7.000000000000000000e+01 9.677076923076924686e+02 3.938388671875000000e+02 6.160827636718750000e+00 0.000000000000000000e+00 0.000000000000000000e+00 3.281850830078125000e+03 4.121871948242187500e+00 4.000000000000000000e+00 3.083655090332031250e+02 5.750000000000000000e+00 4.775000000000000000e+01
1.400000000000000000e+01 1.033000000000000227e+03 4.604247131347656250e+02 5.623107910156250000e+00 0.000000000000000000e+00 0.000000000000000000e+00 3.132129638671875000e+03 4.048375606536865234e+00 3.000000000000000000e+00 3.192592468261718750e+02 6.250000000000000000e+00 4.775000000000000000e+01
7.100000000000000000e+01 1.170076923076923322e+03 4.280410461425781250e+02 5.085418701171875000e+00 0.000000000000000000e+00 0.000000000000000000e+00 2.982408447265625000e+03 3.893635272979736328e+00 4.000000000000000000e+00 5.948168945312500000e+02 6.750000000000000000e+00 4.775000000000000000e+01
2.100000000000000000e+01 1.185923076923076451e+03 4.196927185058593750e+02 4.050292968750000000e+00 0.000000000000000000e+00 3.529411852359771729e-01 2.686096191406250000e+03 3.865404844284057617e+00 3.000000000000000000e+00 8.576015014648437500e+02 7.750000000000000000e+00 4.775000000000000000e+01
1.900000000000000000e+01 1.139353846153846462e+03 5.101941528320312500e+02 3.593139648437500000e+00 0.000000000000000000e+00 0.000000000000000000e+00 2.542635009765625000e+03 3.793146848678588867e+00 3.000000000000000000e+00 8.670602416992187500e+02 8.250000000000000000e+00 4.775000000000000000e+01
1.500000000000000000e+01 9.715769230769229807e+02 5.235537719726562500e+02 2.548278808593750000e+00 0.000000000000000000e+00 2.352941185235977173e-01 2.219163330078125000e+03 3.773273944854736328e+00 3.000000000000000000e+00 6.596091308593750000e+02 9.750000000000000000e+00 4.775000000000000000e+01
2.100000000000000000e+01 1.028646153846154220e+03 5.408602905273437500e+02 2.526580810546875000e+00 0.000000000000000000e+00 0.000000000000000000e+00 2.218251220703125000e+03 3.121572256088256836e+00 3.000000000000000000e+00 7.813034667968750000e+02 1.025000000000000000e+01 4.775000000000000000e+01
6.700000000000000000e+01 1.068838461538461388e+03 5.235186767578125000e+02 2.504852294921875000e+00 0.000000000000000000e+00 0.000000000000000000e+00 2.217338867187500000e+03 3.179459333419799805e+00 4.000000000000000000e+00 8.454102783203125000e+02 1.075000000000000000e+01 4.775000000000000000e+01
4.500000000000000000e+01 1.016153846153846985e+03 5.013884887695312500e+02 2.483154296875000000e+00 0.000000000000000000e+00 0.000000000000000000e+00 2.216426757812500000e+03 1.823306679725646973e+00 4.000000000000000000e+00 6.653682861328125000e+02 1.125000000000000000e+01 4.775000000000000000e+01
6.000000000000000000e+01 1.106615384615384301e+03 5.491916503906250000e+02 2.694763183593750000e+00 0.000000000000000000e+00 0.000000000000000000e+00 2.278816894531250000e+03 1.402799248695373535e+00 4.000000000000000000e+00 8.151457519531250000e+02 1.175000000000000000e+01 4.775000000000000000e+01
7.100000000000000000e+01 1.191361538461538657e+03 5.683552856445312500e+02 2.906372070312500000e+00 0.000000000000000000e+00 0.000000000000000000e+00 2.341207031250000000e+03 9.458922147750854492e-01 4.000000000000000000e+00 1.056975952148437500e+03 1.225000000000000000e+01 4.775000000000000000e+01
3.900000000000000000e+01 1.402507692307692196e+03 5.461865844726562500e+02 3.118011474609375000e+00 0.000000000000000000e+00 0.000000000000000000e+00 2.403597412109375000e+03 1.568674802780151367e+00 3.000000000000000000e+00 1.068860473632812500e+03 1.275000000000000000e+01 4.775000000000000000e+01
5.700000000000000000e+01 1.452230769230769965e+03 5.332830200195312500e+02 3.367584228515625000e+00 0.000000000000000000e+00 0.000000000000000000e+00 2.482020996093750000e+03 1.276942729949951172e+00 4.000000000000000000e+00 9.953905029296875000e+02 1.325000000000000000e+01 4.775000000000000000e+01
4.700000000000000000e+01 1.521569230769229762e+03 5.861497192382812500e+02 3.731048583984375000e+00 0.000000000000000000e+00 0.000000000000000000e+00 2.608545166015625000e+03 1.640414476394653320e+00 4.000000000000000000e+00 1.030379516601562500e+03 1.375000000000000000e+01 4.775000000000000000e+01
3.900000000000000000e+01 1.410869230769230171e+03 5.257824707031250000e+02 4.094543457031250000e+00 0.000000000000000000e+00 0.000000000000000000e+00 2.735069335937500000e+03 1.498281598091125488e+00 3.000000000000000000e+00 1.038969848632812500e+03 1.425000000000000000e+01 4.775000000000000000e+01
7.300000000000000000e+01 1.253184615384614972e+03 5.486753540039062500e+02 4.458007812500000000e+00 0.000000000000000000e+00 0.000000000000000000e+00 2.861593505859375000e+03 8.622084259986877441e-01 4.000000000000000000e+00 1.111413818359375000e+03 1.475000000000000000e+01 4.775000000000000000e+01
6.000000000000000000e+01 1.195430769230769329e+03 5.309637451171875000e+02 4.806732177734375000e+00 0.000000000000000000e+00 0.000000000000000000e+00 2.984701171875000000e+03 1.510671854019165039e+00 4.000000000000000000e+00 1.081149780273437500e+03 1.525000000000000000e+01 4.775000000000000000e+01
1.000000000000000000e+01 1.081792307692307531e+03 4.679893493652343750e+02 5.140686035156250000e+00 0.000000000000000000e+00 0.000000000000000000e+00 3.104391845703125000e+03 3.302614688873291016e+00 3.000000000000000000e+00 1.063571166992187500e+03 1.575000000000000000e+01 4.775000000000000000e+01
4.100000000000000000e+01 6.359999999999997726e+02 2.657358093261718750e+02 6.079559326171875000e+00 0.000000000000000000e+00 5.294117927551269531e-01 3.426984619140625000e+03 4.215020179748535156e+00 3.000000000000000000e+00 1.124877929687500000e+02 1.725000000000000000e+01 4.775000000000000000e+01
1.000000000000000000e+01 5.992076923076921275e+02 2.772285156250000000e+02 6.329498291015625000e+00 0.000000000000000000e+00 5.882353186607360840e-01 3.498035888671875000e+03 4.207092285156250000e+00 3.000000000000000000e+00 1.094174346923828125e+02 1.775000000000000000e+01 4.775000000000000000e+01
7.200000000000000000e+01 9.265538461538463935e+02 3.683333129882812500e+02 5.180206298828125000e+00 0.000000000000000000e+00 2.941176593303680420e-01 3.224450927734375000e+03 1.929163932800292969e+00 4.000000000000000000e+00 8.651101684570312500e+02 2.375000000000000000e+01 4.775000000000000000e+01
4.900000000000000000e+01 9.697384615384621611e+02 3.850516052246093750e+02 4.916015625000000000e+00 0.000000000000000000e+00 0.000000000000000000e+00 3.167474121093750000e+03 1.788436293601989746e+00 4.000000000000000000e+00 5.506646728515625000e+02 2.425000000000000000e+01 4.775000000000000000e+01
5.800000000000000000e+01 1.015215384615385119e+03 3.677100219726562500e+02 4.845947265625000000e+00 0.000000000000000000e+00 2.941176593303680420e-01 3.162315917968750000e+03 9.391209483146667480e-01 4.000000000000000000e+00 1.171172973632812500e+03 2.475000000000000000e+01 4.775000000000000000e+01
4.200000000000000000e+01 8.483538461538462343e+02 3.325547790527343750e+02 4.840545654296875000e+00 0.000000000000000000e+00 0.000000000000000000e+00 3.174430419921875000e+03 1.921826839447021484e+00 3.000000000000000000e+00 1.099834960937500000e+03 2.525000000000000000e+01 4.775000000000000000e+01
6.600000000000000000e+01 6.983615384615386574e+02 2.889519958496093750e+02 4.835144042968750000e+00 0.000000000000000000e+00 0.000000000000000000e+00 3.186545166015625000e+03 3.651635169982910156e+00 4.000000000000000000e+00 7.030861206054687500e+02 2.575000000000000000e+01 4.775000000000000000e+01
5.000000000000000000e+00 5.486076923076923322e+02 2.643022766113281250e+02 7.198120117187500000e+00 0.000000000000000000e+00 3.117647171020507812e+00 3.941870605468750000e+03 4.229863643646240234e+00 1.000000000000000000e+00 9.963153839111328125e+01 4.075000000000000000e+01 4.775000000000000000e+01
2.000000000000000000e+00 3.975230769230769283e+02 2.065854644775390625e+02 6.914825439453125000e+00 0.000000000000000000e+00 2.941176414489746094e+00 4.016477050781250000e+03 4.248549938201904297e+00 1.000000000000000000e+00 1.377897491455078125e+02 4.375000000000000000e+01 4.775000000000000000e+01
1.000000000000000000e+00 3.732076923076923549e+02 2.026882934570312500e+02 7.062744140625000000e+00 0.000000000000000000e+00 2.294117689132690430e+00 4.068830810546875000e+03 4.253262519836425781e+00 1.000000000000000000e+00 9.438305664062500000e+01 4.425000000000000000e+01 4.775000000000000000e+01
1.000000000000000000e+00 3.425384615384613767e+02 1.968747711181640625e+02 7.210693359375000000e+00 0.000000000000000000e+00 1.411764740943908691e+00 4.121184570312500000e+03 4.278061866760253906e+00 1.000000000000000000e+00 9.672758102416992188e+00 4.475000000000000000e+01 4.775000000000000000e+01
2.000000000000000000e+00 3.187153846153845507e+02 1.835709686279296875e+02 7.386627197265625000e+00 0.000000000000000000e+00 1.941176414489746094e+00 4.172638671875000000e+03 4.308266639709472656e+00 1.000000000000000000e+00 4.993757247924804688e+00 4.525000000000000000e+01 4.775000000000000000e+01
0.000000000000000000e+00 2.853692307692309669e+02 1.574551696777343750e+02 7.794616699218750000e+00 0.000000000000000000e+00 1.764705896377563477e+00 4.273746582031250000e+03 4.296546459197998047e+00 1.000000000000000000e+00 9.068337440490722656e+00 4.625000000000000000e+01 4.775000000000000000e+01
0.000000000000000000e+00 1.459076923076923435e+02 8.397372436523437500e+01 5.344787597656250000e+00 0.000000000000000000e+00 2.941176593303680420e-01 3.997582763671875000e+03 4.206846237182617188e+00 1.000000000000000000e+00 9.249788665771484375e+01 6.375000000000000000e+01 4.775000000000000000e+01
0.000000000000000000e+00 1.641230769230769226e+02 9.957718658447265625e+01 5.112548828125000000e+00 0.000000000000000000e+00 8.823529481887817383e-01 3.882675537109375000e+03 4.052607059478759766e+00 1.000000000000000000e+00 3.048597106933593750e+02 6.575000000000000000e+01 4.775000000000000000e+01
0.000000000000000000e+00 1.860461538461538282e+02 1.029048156738281250e+02 4.628875732421875000e+00 0.000000000000000000e+00 1.117647051811218262e+00 3.751035156250000000e+03 3.919717550277709961e+00 1.000000000000000000e+00 5.129025268554687500e+02 6.675000000000000000e+01 4.775000000000000000e+01
0.000000000000000000e+00 2.116307692307692605e+02 1.233086700439453125e+02 2.713226318359375000e+00 0.000000000000000000e+00 1.117647051811218262e+00 3.363336669921875000e+03 3.940893650054931641e+00 1.000000000000000000e+00 5.508850708007812500e+02 7.075000000000000000e+01 4.775000000000000000e+01
0.000000000000000000e+00 2.188923076923076962e+02 1.487619934082031250e+02 2.520568847656250000e+00 0.000000000000000000e+00 1.117647051811218262e+00 3.336495605468750000e+03 3.929052352905273438e+00 1.000000000000000000e+00 5.663318481445312500e+02 7.125000000000000000e+01 4.775000000000000000e+01
0.000000000000000000e+00 2.343230769230769397e+02 1.684234161376953125e+02 2.471435546875000000e+00 0.000000000000000000e+00 1.176470637321472168e+00 3.349094970703125000e+03 3.794401407241821289e+00 1.000000000000000000e+00 7.751714477539062500e+02 7.225000000000000000e+01 4.775000000000000000e+01
0.000000000000000000e+00 2.430999999999999091e+02 1.529763031005859375e+02 2.446868896484375000e+00 0.000000000000000000e+00 8.823529481887817383e-01 3.355394775390625000e+03 3.690198183059692383e+00 1.000000000000000000e+00 8.260484008789062500e+02 7.275000000000000000e+01 4.775000000000000000e+01
0.000000000000000000e+00 2.414615384615385381e+02 1.337732391357421875e+02 2.432495117187500000e+00 0.000000000000000000e+00 1.000000000000000000e+00 3.362127197265625000e+03 3.662863731384277344e+00 1.000000000000000000e+00 8.170248413085937500e+02 7.325000000000000000e+01 4.775000000000000000e+01
0.000000000000000000e+00 2.814000000000000909e+02 8.856083679199218750e+01 1.910186767578125000e+00 0.000000000000000000e+00 0.000000000000000000e+00 3.293422607421875000e+03 3.769903182983398438e+00 1.000000000000000000e+00 7.483648071289062500e+02 7.775000000000000000e+01 4.775000000000000000e+01
1.000000000000000000e+00 3.706461538461538225e+02 1.962216644287109375e+02 1.854797363281250000e+00 0.000000000000000000e+00 1.235294103622436523e+00 3.102798583984375000e+03 3.665527105331420898e+00 1.000000000000000000e+00 8.068265380859375000e+02 8.075000000000000000e+01 4.775000000000000000e+01
0.000000000000000000e+00 3.729999999999999432e+02 2.166241760253906250e+02 1.895996093750000000e+00 0.000000000000000000e+00 9.411764740943908691e-01 3.051953369140625000e+03 3.515433549880981445e+00 1.000000000000000000e+00 9.755595703125000000e+02 8.125000000000000000e+01 4.775000000000000000e+01
1.000000000000000000e+00 2.958307692307691923e+02 1.535568847656250000e+02 1.131072998046875000e+00 0.000000000000000000e+00 1.764705896377563477e+00 2.654032470703125000e+03 3.946190357208251953e+00 1.000000000000000000e+00 5.420648803710937500e+02 8.375000000000000000e+01 4.775000000000000000e+01
8.000000000000000000e+00 2.749384615384616950e+02 1.267500915527343750e+02 1.091003417968750000e-01 0.000000000000000000e+00 2.058823585510253906e+00 2.429166992187500000e+03 3.944792032241821289e+00 1.000000000000000000e+00 3.955061340332031250e+02 8.475000000000000000e+01 4.775000000000000000e+01
0.000000000000000000e+00 2.450769230769230376e+02 1.099105682373046875e+02 -1.458831787109375000e+00 0.000000000000000000e+00 0.000000000000000000e+00 2.190602783203125000e+03 2.399194240570068359e+00 1.000000000000000000e+00 5.979500122070312500e+02 8.575000000000000000e+01 4.775000000000000000e+01
6.000000000000000000e+00 5.426153846153844285e+01 4.626148986816406250e+01 -6.336853027343750000e+00 0.000000000000000000e+00 0.000000000000000000e+00 1.724602294921875000e+03 3.690092802047729492e+00 1.000000000000000000e+00 1.167810546875000000e+03 9.225000000000000000e+01 4.775000000000000000e+01
0.000000000000000000e+00 1.609076923076922867e+02 6.982861328125000000e+01 -5.339874267578125000e+00 9.999999776482582092e-03 0.000000000000000000e+00 1.679385253906250000e+03 1.947438478469848633e+00 1.000000000000000000e+00 1.636050415039062500e+03 9.575000000000000000e+01 4.775000000000000000e+01
2.000000000000000000e+00 2.021769230769229750e+02 8.863260650634765625e+01 -6.382171630859375000e+00 1.726185977458953857e-01 0.000000000000000000e+00 1.588325927734375000e+03 2.473381280899047852e+00 1.000000000000000000e+00 1.865106933593750000e+03 9.675000000000000000e+01 4.775000000000000000e+01
1.000000000000000000e+00 2.771076923076922753e+02 1.266469116210937500e+02 -5.442016601562500000e+00 9.999999776482582092e-03 0.000000000000000000e+00 1.896111572265625000e+03 2.664140939712524414e+00 1.000000000000000000e+00 1.585973144531250000e+03 1.017500000000000000e+02 4.775000000000000000e+01
3.000000000000000000e+00 2.680307692307694651e+02 7.605353546142578125e+01 -2.893920898437500000e+00 9.999999776482582092e-03 0.000000000000000000e+00 2.318662109375000000e+03 3.011756658554077148e+00 1.000000000000000000e+00 1.087249267578125000e+03 1.042500000000000000e+02 4.775000000000000000e+01
5.000000000000000000e+00 2.621846153846153129e+02 7.924904632568359375e+01 -2.617248535156250000e+00 9.999999776482582092e-03 0.000000000000000000e+00 2.376259521484375000e+03 3.006644964218139648e+00 1.000000000000000000e+00 1.228343994140625000e+03 1.047500000000000000e+02 4.775000000000000000e+01
2.000000000000000000e+00 2.550076923076924515e+02 9.268095397949218750e+01 -2.913177490234375000e+00 9.999999776482582092e-03 0.000000000000000000e+00 2.384717773437500000e+03 3.007402896881103516e+00 1.000000000000000000e+00 1.356315185546875000e+03 1.057500000000000000e+02 4.775000000000000000e+01
1.000000000000000000e+00 2.496076923076923038e+02 9.475769042968750000e+01 -3.202667236328125000e+00 9.999999776482582092e-03 0.000000000000000000e+00 2.371157470703125000e+03 3.002602815628051758e+00 1.000000000000000000e+00 1.224832031250000000e+03 1.062500000000000000e+02 4.775000000000000000e+01
1.000000000000000000e+00 2.333769230769230205e+02 9.977890014648437500e+01 -3.492187500000000000e+00 1.085971742868423462e-01 0.000000000000000000e+00 2.357597412109375000e+03 3.001108646392822266e+00 1.000000000000000000e+00 1.478512695312500000e+03 1.067500000000000000e+02 4.775000000000000000e+01
1.000000000000000000e+00 2.511615384615383277e+02 1.014819412231445312e+02 -3.924896240234375000e+00 1.354513019323348999e-01 2.941176593303680420e-01 2.333216064453125000e+03 2.953144073486328125e+00 1.000000000000000000e+00 1.497558837890625000e+03 1.072500000000000000e+02 4.775000000000000000e+01
0.000000000000000000e+00 2.706000000000002501e+02 9.857809448242187500e+01 -4.405364990234375000e+00 2.099105566740036011e-01 2.352941185235977173e-01 2.305227539062500000e+03 2.941369771957397461e+00 1.000000000000000000e+00 1.693919921875000000e+03 1.077500000000000000e+02 4.775000000000000000e+01
1.000000000000000000e+00 2.817846153846153925e+02 9.167172241210937500e+01 -5.366302490234375000e+00 3.479979336261749268e-01 2.941176593303680420e-01 2.249250488281250000e+03 2.942711114883422852e+00 1.000000000000000000e+00 1.652805541992187500e+03 1.087500000000000000e+02 4.775000000000000000e+01
0.000000000000000000e+00 2.351076923076922753e+02 9.414523315429687500e+01 -4.604339599609375000e+00 1.171197593212127686e-01 0.000000000000000000e+00 2.458615722656250000e+03 3.180573463439941406e+00 1.000000000000000000e+00 1.183614379882812500e+03 1.112500000000000000e+02 4.775000000000000000e+01
0.000000000000000000e+00 2.211461538461538794e+02 9.807884216308593750e+01 -4.168975830078125000e+00 9.999999776482582092e-03 1.176470592617988586e-01 2.546269775390625000e+03 3.265930175781250000e+00 1.000000000000000000e+00 1.023785400390625000e+03 1.117500000000000000e+02 4.775000000000000000e+01
1.000000000000000000e+00 2.177230769230770022e+02 9.629997253417968750e+01 -3.233947753906250000e+00 0.000000000000000000e+00 0.000000000000000000e+00 2.717054931640625000e+03 3.341638803482055664e+00 1.000000000000000000e+00 9.504152832031250000e+02 1.127500000000000000e+02 4.775000000000000000e+01
2.000000000000000000e+00 2.000307692307692378e+02 8.537384033203125000e+01 -1.306793212890625000e+00 0.000000000000000000e+00 0.000000000000000000e+00 2.978899169921875000e+03 3.420455932617187500e+00 1.000000000000000000e+00 7.752778320312500000e+02 1.147500000000000000e+02 4.775000000000000000e+01
1.000000000000000000e+00 2.035769230769231797e+02 8.622327423095703125e+01 -1.180694580078125000e+00 0.000000000000000000e+00 7.058823704719543457e-01 2.987388183593750000e+03 3.455360412597656250e+00 1.000000000000000000e+00 6.677609863281250000e+02 1.152500000000000000e+02 4.775000000000000000e+01
0.000000000000000000e+00 2.135846153846152617e+02 9.269152832031250000e+01 -9.284973144531250000e-01 0.000000000000000000e+00 0.000000000000000000e+00 3.004366210937500000e+03 3.500035762786865234e+00 1.000000000000000000e+00 6.284774169921875000e+02 1.162500000000000000e+02 4.775000000000000000e+01
1.000000000000000000e+00 2.263153846153847439e+02 9.570718383789062500e+01 -1.189910888671875000e+00 0.000000000000000000e+00 7.058823704719543457e-01 2.959663574218750000e+03 3.489233732223510742e+00 1.000000000000000000e+00 6.188311767578125000e+02 1.167500000000000000e+02 4.775000000000000000e+01
1.000000000000000000e+00 2.592692307692307168e+02 1.138006591796875000e+02 -1.962188720703125000e+00 9.999999776482582092e-03 5.882353186607360840e-01 2.828276367187500000e+03 3.426903486251831055e+00 1.000000000000000000e+00 7.033332519531250000e+02 1.182500000000000000e+02 4.775000000000000000e+01
1.000000000000000000e+00 2.761923076923076792e+02 1.180343856811523438e+02 -2.175903320312500000e+00 9.999999776482582092e-03 9.411764740943908691e-01 2.794454101562500000e+03 3.349590063095092773e+00 1.000000000000000000e+00 7.315422363281250000e+02 1.187500000000000000e+02 4.775000000000000000e+01
1.400000000000000000e+01 3.708999999999999204e+02 1.772925872802734375e+02 -2.602264404296875000e+00 2.378216832876205444e-01 5.882353186607360840e-01 2.720320312500000000e+03 1.576524376869201660e+00 3.000000000000000000e+00 1.298119995117187500e+03 1.202500000000000000e+02 4.775000000000000000e+01
3.700000000000000000e+01 4.012384615384616495e+02 1.881271667480468750e+02 -2.386383056640625000e+00 1.510630995035171509e-01 0.000000000000000000e+00 2.741164794921875000e+03 1.566720008850097656e+00 3.000000000000000000e+00 1.120308105468750000e+03 1.207500000000000000e+02 4.775000000000000000e+01
2.900000000000000000e+01 4.037153846153844938e+02 1.921504669189453125e+02 -2.170501708984375000e+00 0.000000000000000000e+00 0.000000000000000000e+00 2.762009033203125000e+03 8.118974566459655762e-01 3.000000000000000000e+00 7.680187377929687500e+02 1.212500000000000000e+02 4.775000000000000000e+01
2.600000000000000000e+01 4.219307692307690445e+02 1.915770721435546875e+02 -1.954650878906250000e+00 0.000000000000000000e+00 3.529411852359771729e-01 2.782853515625000000e+03 8.454483151435852051e-01 3.000000000000000000e+00 7.252602539062500000e+02 1.217500000000000000e+02 4.775000000000000000e+01
2.300000000000000000e+01 4.113461538461539249e+02 1.903930053710937500e+02 -1.692382812500000000e+00 0.000000000000000000e+00 1.647058844566345215e+00 2.817162353515625000e+03 8.986248970031738281e-01 3.000000000000000000e+00 5.229946289062500000e+02 1.222500000000000000e+02 4.775000000000000000e+01
3.000000000000000000e+00 4.192769230769229694e+02 1.751805267333984375e+02 -8.591613769531250000e-01 0.000000000000000000e+00 5.882353186607360840e-01 2.933552978515625000e+03 2.834314107894897461e+00 1.000000000000000000e+00 1.600000915527343750e+02 1.237500000000000000e+02 4.775000000000000000e+01
6.000000000000000000e+00 4.382153846153844938e+02 1.840938110351562500e+02 -7.524414062500000000e-01 0.000000000000000000e+00 7.647058963775634766e-01 2.944186767578125000e+03 2.930871009826660156e+00 1.000000000000000000e+00 1.626729125976562500e+02 1.247500000000000000e+02 4.775000000000000000e+01
1.700000000000000000e+01 5.169538461538461434e+02 2.290104370117187500e+02 -9.161071777343750000e-01 0.000000000000000000e+00 1.647058844566345215e+00 2.876287597656250000e+03 1.024603486061096191e+00 3.000000000000000000e+00 2.550733184814453125e+02 1.272500000000000000e+02 4.775000000000000000e+01
5.600000000000000000e+01 5.309076923076922867e+02 2.414903717041015625e+02 -1.040069580078125000e+00 0.000000000000000000e+00 2.941176593303680420e-01 2.851259765625000000e+03 9.225387573242187500e-01 4.000000000000000000e+00 4.308168945312500000e+02 1.277500000000000000e+02 4.775000000000000000e+01
6.100000000000000000e+01 5.458692307692308532e+02 2.592753906250000000e+02 -1.208862304687500000e+00 9.999999776482582092e-03 4.705882370471954346e-01 2.824959228515625000e+03 8.856179118156433105e-01 4.000000000000000000e+00 4.769715270996093750e+02 1.282500000000000000e+02 4.775000000000000000e+01
4.600000000000000000e+01 5.652461538461537884e+02 2.712029113769531250e+02 -1.377655029296875000e+00 0.000000000000000000e+00 0.000000000000000000e+00 2.798658691406250000e+03 8.511975407600402832e-01 4.000000000000000000e+00 2.571584167480468750e+02 1.287500000000000000e+02 4.775000000000000000e+01
6.100000000000000000e+01 5.768769230769229353e+02 2.705157470703125000e+02 -1.546478271484375000e+00 9.999999776482582092e-03 0.000000000000000000e+00 2.772357910156250000e+03 8.057696819305419922e-01 4.000000000000000000e+00 2.943116760253906250e+02 1.292500000000000000e+02 4.775000000000000000e+01
5.400000000000000000e+01 5.733076923076922640e+02 2.598586730957031250e+02 -1.588287353515625000e+00 2.805334925651550293e-01 0.000000000000000000e+00 2.761286865234375000e+03 8.160611391067504883e-01 4.000000000000000000e+00 7.285546264648437500e+02 1.297500000000000000e+02 4.775000000000000000e+01
5.500000000000000000e+01 5.372538461538458705e+02 2.267690887451171875e+02 -1.587799072265625000e+00 0.000000000000000000e+00 0.000000000000000000e+00 2.755292480468750000e+03 9.156584143638610840e-01 4.000000000000000000e+00 2.689671630859375000e+02 1.302500000000000000e+02 4.775000000000000000e+01
5.300000000000000000e+01 5.303461538461540385e+02 2.095557861328125000e+02 -1.587310791015625000e+00 0.000000000000000000e+00 0.000000000000000000e+00 2.749297851562500000e+03 2.209321737289428711e+00 4.000000000000000000e+00 2.215822906494140625e+02 1.307500000000000000e+02 4.775000000000000000e+01
5.000000000000000000e+00 5.275999999999999091e+02 2.066620635986328125e+02 -1.586822509765625000e+00 0.000000000000000000e+00 4.117647171020507812e+00 2.743303466796875000e+03 2.578484296798706055e+00 1.000000000000000000e+00 5.788655471801757812e+01 1.312500000000000000e+02 4.775000000000000000e+01
2.300000000000000000e+01 5.304000000000002046e+02 2.122061462402343750e+02 -1.592041015625000000e+00 0.000000000000000000e+00 3.000000000000000000e+00 2.726190185546875000e+03 2.832752943038940430e+00 3.000000000000000000e+00 5.399180603027343750e+01 1.317500000000000000e+02 4.775000000000000000e+01
5.800000000000000000e+01 7.033461538461541522e+02 3.439757690429687500e+02 -1.444366455078125000e+00 0.000000000000000000e+00 6.470588445663452148e-01 2.447442382812500000e+03 9.003182053565979004e-01 4.000000000000000000e+00 2.341570434570312500e+02 1.357500000000000000e+02 4.775000000000000000e+01
5.700000000000000000e+01 7.352307692307689422e+02 3.625007019042968750e+02 -1.333007812500000000e+00 0.000000000000000000e+00 0.000000000000000000e+00 2.396379638671875000e+03 8.474055528640747070e-01 4.000000000000000000e+00 3.451020202636718750e+02 1.362500000000000000e+02 4.775000000000000000e+01
6.900000000000000000e+01 7.680769230769227534e+02 3.648108215332031250e+02 -1.221679687500000000e+00 1.702549308538436890e-01 0.000000000000000000e+00 2.345317138671875000e+03 1.122343301773071289e+00 4.000000000000000000e+00 7.066760864257812500e+02 1.367500000000000000e+02 4.775000000000000000e+01
6.200000000000000000e+01 7.807538461538460979e+02 3.626555786132812500e+02 -8.489379882812500000e-01 9.999999776482582092e-03 2.941176593303680420e-01 2.305774658203125000e+03 1.662054896354675293e+00 4.000000000000000000e+00 5.747677612304687500e+02 1.372500000000000000e+02 4.775000000000000000e+01
3.600000000000000000e+01 7.788307692307694197e+02 3.304574890136718750e+02 -3.890380859375000000e-01 9.999999776482582092e-03 1.000000000000000000e+00 2.270072509765625000e+03 1.577602863311767578e+00 3.000000000000000000e+00 7.851185302734375000e+02 1.377500000000000000e+02 4.775000000000000000e+01
7.300000000000000000e+01 7.777076923076926960e+02 3.097694702148437500e+02 7.086181640625000000e-02 0.000000000000000000e+00 5.882352963089942932e-02 2.234370117187500000e+03 7.305228114128112793e-01 4.000000000000000000e+00 4.087842102050781250e+02 1.382500000000000000e+02 4.775000000000000000e+01
6.500000000000000000e+01 7.721769230769230035e+02 3.244530334472656250e+02 5.307617187500000000e-01 1.398966312408447266e-01 5.882353186607360840e-01 2.198667968750000000e+03 1.742918729782104492e+00 4.000000000000000000e+00 8.259212646484375000e+02 1.387500000000000000e+02 4.775000000000000000e+01
1.400000000000000000e+01 6.139846153846154948e+02 3.376759948730468750e+02 8.685180664062500000e+00 0.000000000000000000e+00 2.352941185235977173e-01 3.990169921875000000e+03 4.390461444854736328e+00 3.000000000000000000e+00 1.088201675415039062e+02 2.750000000000000000e+00 4.825000000000000000e+01
7.000000000000000000e+01 9.097230769230768601e+02 3.292119750976562500e+02 6.973693847656250000e+00 0.000000000000000000e+00 3.529411852359771729e-01 3.495754638671875000e+03 4.108871459960937500e+00 4.000000000000000000e+00 3.099265441894531250e+02 5.250000000000000000e+00 4.825000000000000000e+01
7.200000000000000000e+01 9.158384615384618428e+02 3.417981262207031250e+02 6.555633544921875000e+00 0.000000000000000000e+00 0.000000000000000000e+00 3.372987548828125000e+03 4.058038234710693359e+00 4.000000000000000000e+00 3.866217346191406250e+02 5.750000000000000000e+00 4.825000000000000000e+01
2.200000000000000000e+01 9.385846153846155175e+02 3.633602905273437500e+02 6.075134277343750000e+00 0.000000000000000000e+00 0.000000000000000000e+00 3.233981689453125000e+03 3.981692314147949219e+00 3.000000000000000000e+00 3.564319152832031250e+02 6.250000000000000000e+00 4.825000000000000000e+01
7.200000000000000000e+01 1.000730769230769397e+03 3.391516418457031250e+02 5.594665527343750000e+00 0.000000000000000000e+00 0.000000000000000000e+00 3.094976074218750000e+03 3.906300783157348633e+00 4.000000000000000000e+00 4.663007507324218750e+02 6.750000000000000000e+00 4.825000000000000000e+01
5.900000000000000000e+01 1.024853846153846234e+03 3.063885803222656250e+02 5.114166259765625000e+00 0.000000000000000000e+00 0.000000000000000000e+00 2.955970214843750000e+03 3.936296224594116211e+00 4.000000000000000000e+00 6.347568359375000000e+02 7.250000000000000000e+00 4.825000000000000000e+01
2.800000000000000000e+01 1.092423076923076678e+03 4.713266906738281250e+02 4.298736572265625000e+00 0.000000000000000000e+00 0.000000000000000000e+00 2.709212646484375000e+03 3.751938104629516602e+00 3.000000000000000000e+00 5.870974731445312500e+02 8.250000000000000000e+00 4.825000000000000000e+01
6.100000000000000000e+01 8.051307692307691468e+02 4.297267150878906250e+02 3.281524658203125000e+00 0.000000000000000000e+00 0.000000000000000000e+00 2.402924316406250000e+03 3.807991027832031250e+00 4.000000000000000000e+00 5.345593872070312500e+02 1.025000000000000000e+01 4.825000000000000000e+01
4.500000000000000000e+01 8.073923076923073268e+02 4.088964233398437500e+02 3.193267822265625000e+00 0.000000000000000000e+00 0.000000000000000000e+00 2.379835205078125000e+03 3.866001605987548828e+00 4.000000000000000000e+00 5.519005126953125000e+02 1.075000000000000000e+01 4.825000000000000000e+01
1.400000000000000000e+01 6.811923076923077360e+02 4.138140869140625000e+02 3.207458496093750000e+00 0.000000000000000000e+00 0.000000000000000000e+00 2.395063476562500000e+03 3.829109430313110352e+00 3.000000000000000000e+00 4.795189208984375000e+02 1.175000000000000000e+01 4.825000000000000000e+01
5.500000000000000000e+01 9.802769230769227988e+02 4.601565246582031250e+02 3.412384033203125000e+00 0.000000000000000000e+00 0.000000000000000000e+00 2.471698730468750000e+03 3.869137287139892578e+00 4.000000000000000000e+00 4.295695190429687500e+02 1.275000000000000000e+01 4.825000000000000000e+01
5.000000000000000000e+00 9.999461538461539476e+02 4.429400939941406250e+02 3.795013427734375000e+00 0.000000000000000000e+00 0.000000000000000000e+00 2.622501708984375000e+03 3.905868530273437500e+00 1.000000000000000000e+00 3.807039489746093750e+02 1.375000000000000000e+01 4.825000000000000000e+01
8.000000000000000000e+00 8.523153846153843460e+02 4.543377685546875000e+02 4.284301757812500000e+00 0.000000000000000000e+00 0.000000000000000000e+00 2.817805419921875000e+03 3.865616798400878906e+00 1.000000000000000000e+00 3.584646301269531250e+02 1.475000000000000000e+01 4.825000000000000000e+01
4.700000000000000000e+01 8.075538461538465071e+02 4.333437500000000000e+02 4.550201416015625000e+00 0.000000000000000000e+00 0.000000000000000000e+00 2.919555419921875000e+03 3.862278699874877930e+00 4.000000000000000000e+00 3.956543579101562500e+02 1.525000000000000000e+01 4.825000000000000000e+01
4.600000000000000000e+01 6.790076923076923094e+02 3.210589294433593750e+02 5.124511718750000000e+00 0.000000000000000000e+00 0.000000000000000000e+00 3.131252197265625000e+03 4.105731487274169922e+00 4.000000000000000000e+00 3.744438781738281250e+02 1.625000000000000000e+01 4.825000000000000000e+01
4.200000000000000000e+01 7.031538461538463025e+02 3.518211059570312500e+02 6.378204345703125000e+00 0.000000000000000000e+00 2.352941185235977173e-01 3.506409423828125000e+03 3.929192066192626953e+00 3.000000000000000000e+00 2.512518615722656250e+02 1.975000000000000000e+01 4.825000000000000000e+01
3.400000000000000000e+01 6.936769230769234582e+02 3.487603454589843750e+02 6.387817382812500000e+00 0.000000000000000000e+00 5.882353186607360840e-01 3.504666259765625000e+03 3.795631408691406250e+00 3.000000000000000000e+00 1.714075927734375000e+02 2.025000000000000000e+01 4.825000000000000000e+01
7.400000000000000000e+01 8.450538461538458250e+02 3.795484924316406250e+02 5.332916259765625000e+00 0.000000000000000000e+00 0.000000000000000000e+00 3.234156982421875000e+03 2.807282447814941406e+00 4.000000000000000000e+00 5.421208496093750000e+02 2.325000000000000000e+01 4.825000000000000000e+01
4.700000000000000000e+01 9.611538461538459615e+02 4.099004516601562500e+02 5.108612060546875000e+00 0.000000000000000000e+00 0.000000000000000000e+00 3.185083007812500000e+03 1.665420174598693848e+00 4.000000000000000000e+00 6.506713867187500000e+02 2.375000000000000000e+01 4.825000000000000000e+01
4.200000000000000000e+01 1.059846153846153584e+03 4.129570007324218750e+02 4.884307861328125000e+00 0.000000000000000000e+00 0.000000000000000000e+00 3.136009033203125000e+03 3.043108940124511719e+00 3.000000000000000000e+00 1.241944946289062500e+03 2.425000000000000000e+01 4.825000000000000000e+01
5.400000000000000000e+01 9.375923076923079407e+02 3.672840576171875000e+02 4.812377929687500000e+00 0.000000000000000000e+00 0.000000000000000000e+00 3.132526855468750000e+03 3.394389867782592773e+00 4.000000000000000000e+00 1.136257202148437500e+03 2.475000000000000000e+01 4.825000000000000000e+01
2.600000000000000000e+01 5.527538461538464389e+02 2.897664794921875000e+02 5.805114746093750000e+00 0.000000000000000000e+00 2.294117689132690430e+00 3.508998535156250000e+03 4.080933570861816406e+00 3.000000000000000000e+00 2.536354980468750000e+02 2.875000000000000000e+01 4.825000000000000000e+01
3.400000000000000000e+01 5.464461538461536065e+02 2.703635864257812500e+02 7.384490966796875000e+00 0.000000000000000000e+00 1.705882310867309570e+00 3.907662353515625000e+03 4.061444759368896484e+00 3.000000000000000000e+00 2.238902893066406250e+02 3.825000000000000000e+01 4.825000000000000000e+01
3.000000000000000000e+00 4.415307692307691809e+02 2.463124389648437500e+02 6.633453369140625000e+00 0.000000000000000000e+00 2.882352828979492188e+00 3.894486816406250000e+03 4.207233428955078125e+00 1.000000000000000000e+00 6.621333312988281250e+01 4.225000000000000000e+01 4.825000000000000000e+01
1.000000000000000000e+00 4.075384615384615472e+02 2.180810241699218750e+02 6.544006347656250000e+00 0.000000000000000000e+00 2.294117689132690430e+00 3.926006835937500000e+03 4.232681274414062500e+00 1.000000000000000000e+00 6.182879638671875000e+01 4.325000000000000000e+01 4.825000000000000000e+01
1.000000000000000000e+00 3.983384615384615586e+02 2.051407623291015625e+02 6.646575927734375000e+00 0.000000000000000000e+00 3.176470518112182617e+00 3.969721435546875000e+03 4.220956802368164062e+00 1.000000000000000000e+00 1.042126617431640625e+02 4.375000000000000000e+01 4.825000000000000000e+01
1.000000000000000000e+00 3.419384615384615813e+02 1.980407867431640625e+02 6.851715087890625000e+00 0.000000000000000000e+00 3.588235378265380859e+00 4.057150878906250000e+03 4.264045238494873047e+00 1.000000000000000000e+00 6.847599983215332031e+00 4.475000000000000000e+01 4.825000000000000000e+01
1.000000000000000000e+00 3.308384615384615017e+02 1.888653411865234375e+02 6.969573974609375000e+00 0.000000000000000000e+00 2.352941274642944336e+00 4.096692871093750000e+03 4.270348072052001953e+00 1.000000000000000000e+00 8.980811119079589844e+00 4.525000000000000000e+01 4.825000000000000000e+01
1.000000000000000000e+00 3.111999999999999318e+02 1.739699707031250000e+02 7.102691650390625000e+00 0.000000000000000000e+00 1.294117689132690430e+00 4.132062011718750000e+03 4.256240367889404297e+00 1.000000000000000000e+00 5.871072292327880859e+00 4.575000000000000000e+01 4.825000000000000000e+01
2.000000000000000000e+00 2.989000000000000341e+02 1.623378753662109375e+02 7.235839843750000000e+00 0.000000000000000000e+00 1.647058844566345215e+00 4.167431152343750000e+03 4.243636608123779297e+00 1.000000000000000000e+00 3.490424394607543945e+00 4.625000000000000000e+01 4.825000000000000000e+01
1.000000000000000000e+00 2.815000000000001137e+02 1.568671112060546875e+02 7.368988037109375000e+00 0.000000000000000000e+00 2.058823585510253906e+00 4.202800781250000000e+03 4.238174438476562500e+00 1.000000000000000000e+00 2.351423835754394531e+01 4.675000000000000000e+01 4.825000000000000000e+01
0.000000000000000000e+00 2.125692307692308134e+02 1.252755966186523438e+02 5.869995117187500000e+00 0.000000000000000000e+00 1.058823585510253906e+00 3.987371826171875000e+03 4.237528324127197266e+00 1.000000000000000000e+00 2.516191864013671875e+01 5.375000000000000000e+01 4.825000000000000000e+01
0.000000000000000000e+00 2.575153846153845052e+02 1.436983947753906250e+02 5.035156250000000000e+00 0.000000000000000000e+00 1.529411792755126953e+00 3.853563232421875000e+03 4.062009334564208984e+00 1.000000000000000000e+00 1.910364685058593750e+02 5.675000000000000000e+01 4.825000000000000000e+01
0.000000000000000000e+00 2.545076923076923094e+02 1.403345642089843750e+02 4.892150878906250000e+00 0.000000000000000000e+00 1.058823585510253906e+00 3.826207031250000000e+03 4.037082672119140625e+00 1.000000000000000000e+00 1.757654418945312500e+02 5.725000000000000000e+01 4.825000000000000000e+01
0.000000000000000000e+00 2.356999999999999886e+02 1.309878692626953125e+02 4.617797851562500000e+00 0.000000000000000000e+00 1.764705896377563477e+00 3.775410156250000000e+03 4.004312992095947266e+00 1.000000000000000000e+00 2.882778930664062500e+02 5.825000000000000000e+01 4.825000000000000000e+01
1.000000000000000000e+00 2.239769230769230148e+02 1.276258850097656250e+02 4.521392822265625000e+00 0.000000000000000000e+00 1.764705896377563477e+00 3.763715087890625000e+03 4.008122444152832031e+00 1.000000000000000000e+00 2.645542602539062500e+02 5.875000000000000000e+01 4.825000000000000000e+01
1.000000000000000000e+00 1.992769230769230262e+02 1.191675262451171875e+02 4.328613281250000000e+00 0.000000000000000000e+00 8.235294222831726074e-01 3.740324951171875000e+03 4.048019886016845703e+00 1.000000000000000000e+00 1.797160339355468750e+02 5.975000000000000000e+01 4.825000000000000000e+01
0.000000000000000000e+00 1.591307692307691752e+02 8.841674041748046875e+01 4.361633300781250000e+00 0.000000000000000000e+00 1.941176414489746094e+00 3.779222167968750000e+03 4.154685974121093750e+00 1.000000000000000000e+00 7.918309783935546875e+01 6.175000000000000000e+01 4.825000000000000000e+01
0.000000000000000000e+00 1.516153846153846985e+02 8.549327087402343750e+01 4.731628417968750000e+00 0.000000000000000000e+00 7.647058963775634766e-01 3.841164306640625000e+03 4.035400390625000000e+00 1.000000000000000000e+00 1.762438964843750000e+02 6.375000000000000000e+01 4.825000000000000000e+01
1.000000000000000000e+00 1.697846153846153356e+02 9.840170288085937500e+01 4.640472412109375000e+00 0.000000000000000000e+00 5.294117927551269531e-01 3.749105468750000000e+03 4.002477645874023438e+00 1.000000000000000000e+00 2.970170593261718750e+02 6.575000000000000000e+01 4.825000000000000000e+01
0.000000000000000000e+00 1.907692307692308304e+02 1.023893585205078125e+02 4.233459472656250000e+00 0.000000000000000000e+00 8.823529481887817383e-01 3.628498291015625000e+03 3.839841127395629883e+00 1.000000000000000000e+00 5.707996215820312500e+02 6.675000000000000000e+01 4.825000000000000000e+01
0.000000000000000000e+00 1.983846153846154152e+02 1.008988189697265625e+02 3.795471191406250000e+00 0.000000000000000000e+00 1.176470637321472168e+00 3.508965820312500000e+03 3.837512969970703125e+00 1.000000000000000000e+00 4.158915100097656250e+02 6.775000000000000000e+01 4.825000000000000000e+01
1.000000000000000000e+00 2.036384615384616552e+02 9.748841094970703125e+01 3.529998779296875000e+00 0.000000000000000000e+00 1.235294103622436523e+00 3.450812011718750000e+03 3.872873067855834961e+00 1.000000000000000000e+00 5.093764038085937500e+02 6.825000000000000000e+01 4.825000000000000000e+01
0.000000000000000000e+00 2.037307692307691696e+02 9.306594848632812500e+01 3.264526367187500000e+00 0.000000000000000000e+00 1.117647051811218262e+00 3.392657958984375000e+03 3.878807306289672852e+00 1.000000000000000000e+00 4.697697448730468750e+02 6.875000000000000000e+01 4.825000000000000000e+01
0.000000000000000000e+00 2.030923076923075712e+02 8.950444030761718750e+01 2.745574951171875000e+00 0.000000000000000000e+00 1.117647051811218262e+00 3.292896728515625000e+03 3.915254831314086914e+00 1.000000000000000000e+00 3.650143432617187500e+02 6.975000000000000000e+01 4.825000000000000000e+01
0.000000000000000000e+00 2.253076923076923208e+02 1.273552856445312500e+02 2.246551513671875000e+00 0.000000000000000000e+00 1.764705896377563477e+00 3.220712646484375000e+03 3.871350765228271484e+00 1.000000000000000000e+00 4.823507690429687500e+02 7.075000000000000000e+01 4.825000000000000000e+01
1.000000000000000000e+00 2.597076923076922981e+02 1.852962646484375000e+02 1.734954833984375000e+00 0.000000000000000000e+00 1.823529362678527832e+00 3.172254882812500000e+03 3.688370943069458008e+00 1.000000000000000000e+00 7.710828247070312500e+02 7.225000000000000000e+01 4.825000000000000000e+01
1.000000000000000000e+00 2.690615384615384755e+02 1.782021026611328125e+02 1.603912353515625000e+00 0.000000000000000000e+00 1.235294103622436523e+00 3.166071777343750000e+03 3.609226703643798828e+00 1.000000000000000000e+00 7.275146484375000000e+02 7.275000000000000000e+01 4.825000000000000000e+01
1.000000000000000000e+00 2.644230769230770193e+02 1.640268249511718750e+02 1.484710693359375000e+00 0.000000000000000000e+00 8.823529481887817383e-01 3.161058837890625000e+03 3.579695463180541992e+00 1.000000000000000000e+00 7.251354370117187500e+02 7.325000000000000000e+01 4.825000000000000000e+01
0.000000000000000000e+00 2.590615384615385324e+02 1.465970306396484375e+02 1.401062011718750000e+00 0.000000000000000000e+00 9.411764740943908691e-01 3.159555175781250000e+03 3.581976652145385742e+00 1.000000000000000000e+00 7.625274658203125000e+02 7.375000000000000000e+01 4.825000000000000000e+01
1.000000000000000000e+00 2.466076923076923890e+02 1.305303802490234375e+02 1.317413330078125000e+00 0.000000000000000000e+00 9.411764740943908691e-01 3.158051757812500000e+03 3.557335138320922852e+00 1.000000000000000000e+00 8.392954101562500000e+02 7.425000000000000000e+01 4.825000000000000000e+01
0.000000000000000000e+00 2.452153846153846359e+02 1.192919845581054688e+02 1.233795166015625000e+00 0.000000000000000000e+00 7.058823704719543457e-01 3.156548095703125000e+03 3.548117399215698242e+00 1.000000000000000000e+00 8.769896240234375000e+02 7.475000000000000000e+01 4.825000000000000000e+01
1.000000000000000000e+00 2.307461538461539590e+02 1.072971267700195312e+02 1.034912109375000000e+00 0.000000000000000000e+00 7.647058963775634766e-01 3.145066406250000000e+03 3.698714494705200195e+00 1.000000000000000000e+00 7.915403442382812500e+02 7.575000000000000000e+01 4.825000000000000000e+01
1.000000000000000000e+00 2.426923076923077360e+02 9.815553283691406250e+01 9.302062988281250000e-01 0.000000000000000000e+00 5.294117927551269531e-01 3.137913085937500000e+03 3.717974424362182617e+00 1.000000000000000000e+00 6.839975585937500000e+02 7.625000000000000000e+01 4.825000000000000000e+01
1.000000000000000000e+00 2.526769230769230603e+02 8.903002166748046875e+01 8.255004882812500000e-01 0.000000000000000000e+00 5.882353186607360840e-01 3.130759765625000000e+03 3.737193346023559570e+00 1.000000000000000000e+00 8.206016845703125000e+02 7.675000000000000000e+01 4.825000000000000000e+01
1.000000000000000000e+00 2.747538461538460410e+02 8.873680114746093750e+01 6.309509277343750000e-01 0.000000000000000000e+00 2.941176593303680420e-01 3.096920898437500000e+03 3.748806953430175781e+00 1.000000000000000000e+00 7.246191406250000000e+02 7.775000000000000000e+01 4.825000000000000000e+01
1.000000000000000000e+00 3.123000000000000114e+02 1.116060791015625000e+02 4.385375976562500000e-01 0.000000000000000000e+00 7.058823704719543457e-01 3.060291748046875000e+03 3.653623819351196289e+00 1.000000000000000000e+00 7.818644409179687500e+02 7.875000000000000000e+01 4.825000000000000000e+01
2.000000000000000000e+00 3.382615384615384073e+02 1.293096618652343750e+02 5.729675292968750000e-01 0.000000000000000000e+00 5.882353186607360840e-01 3.035480224609375000e+03 3.583177328109741211e+00 1.000000000000000000e+00 8.447344360351562500e+02 7.925000000000000000e+01 4.825000000000000000e+01
1.000000000000000000e+00 3.617999999999998977e+02 1.476357269287109375e+02 7.074279785156250000e-01 0.000000000000000000e+00 2.941176593303680420e-01 3.010668457031250000e+03 3.578571081161499023e+00 1.000000000000000000e+00 1.020104248046875000e+03 7.975000000000000000e+01 4.825000000000000000e+01
0.000000000000000000e+00 3.600769230769229807e+02 1.640192565917968750e+02 8.418884277343750000e-01 0.000000000000000000e+00 0.000000000000000000e+00 2.985856933593750000e+03 3.662450075149536133e+00 1.000000000000000000e+00 6.981666870117187500e+02 8.025000000000000000e+01 4.825000000000000000e+01
2.000000000000000000e+00 3.353461538461539249e+02 1.783680572509765625e+02 1.037994384765625000e+00 0.000000000000000000e+00 1.705882310867309570e+00 2.835895751953125000e+03 3.619733810424804688e+00 1.000000000000000000e+00 8.165269165039062500e+02 8.175000000000000000e+01 4.825000000000000000e+01
2.000000000000000000e+00 3.030384615384615472e+02 1.742635803222656250e+02 1.080352783203125000e+00 0.000000000000000000e+00 1.058823585510253906e+00 2.777516845703125000e+03 3.769973278045654297e+00 1.000000000000000000e+00 6.171304931640625000e+02 8.225000000000000000e+01 4.825000000000000000e+01
1.000000000000000000e+00 3.098076923076923777e+02 1.470778808593750000e+02 -4.384613037109375000e+00 0.000000000000000000e+00 5.882352963089942932e-02 1.706182861328125000e+03 3.525933980941772461e+00 1.000000000000000000e+00 7.965232543945312500e+02 8.625000000000000000e+01 4.825000000000000000e+01
2.000000000000000000e+00 3.034230769230768487e+02 1.545289916992187500e+02 -5.632202148437500000e+00 0.000000000000000000e+00 0.000000000000000000e+00 1.582251586914062500e+03 3.326425075531005859e+00 1.000000000000000000e+00 1.100798583984375000e+03 8.675000000000000000e+01 4.825000000000000000e+01
1.000000000000000000e+01 3.265461538461537430e+02 1.550700225830078125e+02 -6.879821777343750000e+00 0.000000000000000000e+00 0.000000000000000000e+00 1.458320190429687500e+03 2.887725353240966797e+00 3.000000000000000000e+00 1.128702514648437500e+03 8.725000000000000000e+01 4.825000000000000000e+01
1.000000000000000000e+00 9.976923076923077360e+01 5.112578582763671875e+01 -7.623809814453125000e+00 0.000000000000000000e+00 2.941176593303680420e-01 1.520273803710937500e+03 3.185928583145141602e+00 1.000000000000000000e+00 1.223932006835937500e+03 9.175000000000000000e+01 4.825000000000000000e+01
0.000000000000000000e+00 1.835230769230770136e+02 6.080771255493164062e+01 -4.825469970703125000e+00 1.113905906677246094e-01 0.000000000000000000e+00 1.673710083007812500e+03 1.605312585830688477e+00 1.000000000000000000e+00 1.601525268554687500e+03 9.475000000000000000e+01 4.825000000000000000e+01
1.100000000000000000e+01 2.898923076923078952e+02 1.130563735961914062e+02 -3.689178466796875000e+00 1.478942483663558960e-01 0.000000000000000000e+00 2.084282958984375000e+03 2.907668590545654297e+00 3.000000000000000000e+00 1.712728881835937500e+03 1.032500000000000000e+02 4.825000000000000000e+01
7.000000000000000000e+00 2.932692307692308304e+02 1.077671127319335938e+02 -3.401580810546875000e+00 2.445408254861831665e-01 3.529411852359771729e-01 2.141916503906250000e+03 3.005818128585815430e+00 1.000000000000000000e+00 1.622329589843750000e+03 1.037500000000000000e+02 4.825000000000000000e+01
1.000000000000000000e+00 2.723538461538462343e+02 1.003168869018554688e+02 -3.113952636718750000e+00 0.000000000000000000e+00 1.176470637321472168e+00 2.199550048828125000e+03 3.168650150299072266e+00 1.000000000000000000e+00 1.064784545898437500e+03 1.042500000000000000e+02 4.825000000000000000e+01
7.000000000000000000e+00 2.762384615384614790e+02 9.769276428222656250e+01 -2.826354980468750000e+00 9.999999776482582092e-03 5.294117927551269531e-01 2.257183837890625000e+03 3.192795276641845703e+00 1.000000000000000000e+00 1.300399169921875000e+03 1.047500000000000000e+02 4.825000000000000000e+01
6.000000000000000000e+00 2.697923076923075882e+02 1.007167510986328125e+02 -2.838226318359375000e+00 9.999999776482582092e-03 1.705882310867309570e+00 2.277034912109375000e+03 3.169184207916259766e+00 1.000000000000000000e+00 1.208042602539062500e+03 1.052500000000000000e+02 4.825000000000000000e+01
3.400000000000000000e+01 2.816153846153845279e+02 1.052350692749023438e+02 -3.149597167968750000e+00 1.630315780639648438e-01 8.823529481887817383e-01 2.259103759765625000e+03 3.079716205596923828e+00 3.000000000000000000e+00 1.423944702148437500e+03 1.057500000000000000e+02 4.825000000000000000e+01
2.000000000000000000e+00 2.629230769230770193e+02 1.071234512329101562e+02 -3.460968017578125000e+00 9.999999776482582092e-03 1.117647051811218262e+00 2.241172607421875000e+03 3.087684154510498047e+00 1.000000000000000000e+00 1.271973388671875000e+03 1.062500000000000000e+02 4.825000000000000000e+01
5.100000000000000000e+01 3.434384615384614676e+02 9.886669158935546875e+01 -5.381591796875000000e+00 5.544708371162414551e-01 5.294117927551269531e-01 2.123066650390625000e+03 2.656683683395385742e+00 4.000000000000000000e+00 1.880336425781250000e+03 1.082500000000000000e+02 4.825000000000000000e+01
1.500000000000000000e+01 3.246923076923075655e+02 9.117234039306640625e+01 -5.938476562500000000e+00 1.895626187324523926e-01 1.176470592617988586e-01 2.088269775390625000e+03 2.769512891769409180e+00 3.000000000000000000e+00 1.449500488281250000e+03 1.087500000000000000e+02 4.825000000000000000e+01
1.000000000000000000e+01 3.063923076923077247e+02 7.886558532714843750e+01 -5.841217041015625000e+00 2.770149111747741699e-01 1.000000000000000000e+00 2.138545166015625000e+03 2.911512851715087891e+00 3.000000000000000000e+00 1.387669677734375000e+03 1.097500000000000000e+02 4.825000000000000000e+01
1.000000000000000000e+00 2.877307692307692832e+02 7.382282257080078125e+01 -5.792572021484375000e+00 9.999999776482582092e-03 9.411764740943908691e-01 2.163682861328125000e+03 3.037262678146362305e+00 1.000000000000000000e+00 1.152468627929687500e+03 1.102500000000000000e+02 4.825000000000000000e+01
1.000000000000000000e+00 2.179230769230767351e+02 9.046731567382812500e+01 -2.430389404296875000e+00 0.000000000000000000e+00 6.470588445663452148e-01 2.791269531250000000e+03 3.354309558868408203e+00 1.000000000000000000e+00 8.533530273437500000e+02 1.137500000000000000e+02 4.825000000000000000e+01
3.000000000000000000e+00 2.143461538461538112e+02 8.807866668701171875e+01 -1.484649658203125000e+00 0.000000000000000000e+00 3.529411852359771729e-01 2.925925537109375000e+03 3.351533174514770508e+00 1.000000000000000000e+00 7.443667602539062500e+02 1.147500000000000000e+02 4.825000000000000000e+01
1.000000000000000000e+00 2.198461538461539533e+02 9.355667877197265625e+01 -9.730224609375000000e-01 0.000000000000000000e+00 0.000000000000000000e+00 2.985811767578125000e+03 3.499735116958618164e+00 1.000000000000000000e+00 6.767038574218750000e+02 1.162500000000000000e+02 4.825000000000000000e+01
1.000000000000000000e+00 2.254461538461539760e+02 9.654508209228515625e+01 -1.268676757812500000e+00 0.000000000000000000e+00 0.000000000000000000e+00 2.936975097656250000e+03 3.543466806411743164e+00 1.000000000000000000e+00 5.593056640625000000e+02 1.167500000000000000e+02 4.825000000000000000e+01
1.000000000000000000e+00 2.409769230769231001e+02 1.083308639526367188e+02 -1.859954833984375000e+00 0.000000000000000000e+00 5.882352963089942932e-02 2.839301513671875000e+03 3.510463237762451172e+00 1.000000000000000000e+00 5.848309936523437500e+02 1.177500000000000000e+02 4.825000000000000000e+01
0.000000000000000000e+00 2.556846153846153982e+02 1.124340362548828125e+02 -2.164001464843750000e+00 0.000000000000000000e+00 0.000000000000000000e+00 2.790391113281250000e+03 3.477954149246215820e+00 1.000000000000000000e+00 6.310646972656250000e+02 1.182500000000000000e+02 4.825000000000000000e+01
2.000000000000000000e+00 2.691769230769229466e+02 1.186749877929687500e+02 -2.493347167968750000e+00 0.000000000000000000e+00 2.352941185235977173e-01 2.741260498046875000e+03 3.451370239257812500e+00 1.000000000000000000e+00 7.180801391601562500e+02 1.187500000000000000e+02 4.825000000000000000e+01
3.000000000000000000e+00 2.937692307692307736e+02 1.298379974365234375e+02 -2.822692871093750000e+00 9.999999776482582092e-03 5.882352963089942932e-02 2.692129638671875000e+03 3.398871421813964844e+00 1.000000000000000000e+00 7.181241455078125000e+02 1.192500000000000000e+02 4.825000000000000000e+01
4.500000000000000000e+01 3.595769230769232649e+02 1.626591644287109375e+02 -3.239318847656250000e+00 9.999999776482582092e-03 2.941176593303680420e-01 2.625990966796875000e+03 1.654211163520812988e+00 4.000000000000000000e+00 8.259795532226562500e+02 1.202500000000000000e+02 4.825000000000000000e+01
4.300000000000000000e+01 3.856615384615387825e+02 1.787878723144531250e+02 -3.084625244140625000e+00 1.742403507232666016e-01 0.000000000000000000e+00 2.641106445312500000e+03 1.435891747474670410e+00 3.000000000000000000e+00 1.092812988281250000e+03 1.207500000000000000e+02 4.825000000000000000e+01
5.100000000000000000e+01 4.124923076923076906e+02 1.916457977294921875e+02 -2.929901123046875000e+00 1.974066793918609619e-01 0.000000000000000000e+00 2.656221679687500000e+03 9.180157184600830078e-01 4.000000000000000000e+00 1.048720092773437500e+03 1.212500000000000000e+02 4.825000000000000000e+01
4.200000000000000000e+01 4.236461538461540499e+02 1.916428527832031250e+02 -2.775177001953125000e+00 9.999999776482582092e-03 0.000000000000000000e+00 2.671337158203125000e+03 8.209539651870727539e-01 3.000000000000000000e+00 7.226536254882812500e+02 1.217500000000000000e+02 4.825000000000000000e+01
4.100000000000000000e+01 4.303153846153845734e+02 1.921736145019531250e+02 -2.517486572265625000e+00 0.000000000000000000e+00 5.294117927551269531e-01 2.704357910156250000e+03 8.501626849174499512e-01 3.000000000000000000e+00 5.097692260742187500e+02 1.222500000000000000e+02 4.825000000000000000e+01
1.000000000000000000e+00 4.321076923076922185e+02 1.925308685302734375e+02 -2.225463867187500000e+00 0.000000000000000000e+00 1.176470637321472168e+00 2.743347167968750000e+03 8.827784657478332520e-01 1.000000000000000000e+00 5.081533203125000000e+02 1.227500000000000000e+02 4.825000000000000000e+01
1.600000000000000000e+01 4.339076923076921730e+02 1.851769714355468750e+02 -1.641448974609375000e+00 0.000000000000000000e+00 5.882353186607360840e-01 2.821325927734375000e+03 3.597013711929321289e+00 3.000000000000000000e+00 2.890722656250000000e+02 1.237500000000000000e+02 4.825000000000000000e+01
5.000000000000000000e+00 4.614076923076921730e+02 1.990797271728515625e+02 -1.298858642578125000e+00 0.000000000000000000e+00 3.529411852359771729e-01 2.865750976562500000e+03 1.956099748611450195e+00 1.000000000000000000e+00 2.633408813476562500e+02 1.252500000000000000e+02 4.825000000000000000e+01
5.000000000000000000e+00 5.180307692307692378e+02 2.179698181152343750e+02 -1.263427734375000000e+00 0.000000000000000000e+00 1.176470637321472168e+00 2.841800292968750000e+03 1.867153048515319824e+00 1.000000000000000000e+00 2.787452697753906250e+02 1.267500000000000000e+02 4.825000000000000000e+01
3.500000000000000000e+01 5.365153846153849599e+02 2.266383361816406250e+02 -1.285766601562500000e+00 0.000000000000000000e+00 1.588235259056091309e+00 2.826219482421875000e+03 9.822342991828918457e-01 3.000000000000000000e+00 3.572952880859375000e+02 1.272500000000000000e+02 4.825000000000000000e+01
4.500000000000000000e+01 5.428230769230769965e+02 2.394093322753906250e+02 -1.376098632812500000e+00 9.999999776482582092e-03 4.117647111415863037e-01 2.805213623046875000e+03 9.044516086578369141e-01 4.000000000000000000e+00 4.417870178222656250e+02 1.277500000000000000e+02 4.825000000000000000e+01
4.400000000000000000e+01 5.710461538461541977e+02 2.534633941650390625e+02 -1.534454345703125000e+00 9.999999776482582092e-03 7.647058963775634766e-01 2.778782470703125000e+03 8.666597604751586914e-01 3.000000000000000000e+00 4.835313415527343750e+02 1.282500000000000000e+02 4.825000000000000000e+01
6.700000000000000000e+01 5.706769230769231172e+02 2.610786743164062500e+02 -1.692779541015625000e+00 9.999999776482582092e-03 5.882353186607360840e-01 2.752351318359375000e+03 8.689765930175781250e-01 4.000000000000000000e+00 4.584085998535156250e+02 1.287500000000000000e+02 4.825000000000000000e+01
6.500000000000000000e+01 5.769769230769230717e+02 2.585056762695312500e+02 -1.851104736328125000e+00 9.999999776482582092e-03 0.000000000000000000e+00 2.725920410156250000e+03 1.129109263420104980e+00 4.000000000000000000e+00 4.975625000000000000e+02 1.292500000000000000e+02 4.825000000000000000e+01
6.000000000000000000e+01 5.790769230769235492e+02 2.499776306152343750e+02 -1.918884277343750000e+00 9.999999776482582092e-03 2.352941185235977173e-01 2.709198730468750000e+03 8.840988278388977051e-01 4.000000000000000000e+00 5.067026367187500000e+02 1.297500000000000000e+02 4.825000000000000000e+01
4.800000000000000000e+01 5.729230769230772466e+02 2.337310791015625000e+02 -1.956451416015625000e+00 0.000000000000000000e+00 0.000000000000000000e+00 2.695713623046875000e+03 9.024530053138732910e-01 4.000000000000000000e+00 2.893688964843750000e+02 1.302500000000000000e+02 4.825000000000000000e+01
5.400000000000000000e+01 5.740461538461538566e+02 2.268195953369140625e+02 -1.994018554687500000e+00 0.000000000000000000e+00 0.000000000000000000e+00 2.682228759765625000e+03 9.038768410682678223e-01 4.000000000000000000e+00 2.650623168945312500e+02 1.307500000000000000e+02 4.825000000000000000e+01
6.500000000000000000e+01 5.622384615384617064e+02 2.394381103515625000e+02 -2.031585693359375000e+00 1.243781447410583496e-01 0.000000000000000000e+00 2.668743652343750000e+03 1.344438791275024414e+00 4.000000000000000000e+00 5.709625854492187500e+02 1.312500000000000000e+02 4.825000000000000000e+01
1.800000000000000000e+01 5.559461538461539476e+02 2.450251464843750000e+02 -2.070678710937500000e+00 0.000000000000000000e+00 1.176470637321472168e+00 2.646830566406250000e+03 9.482516646385192871e-01 3.000000000000000000e+00 1.017840576171875000e+02 1.317500000000000000e+02 4.825000000000000000e+01
2.300000000000000000e+01 5.600615384615383618e+02 2.478148956298828125e+02 -2.109802246093750000e+00 0.000000000000000000e+00 2.705882310867309570e+00 2.624917724609375000e+03 9.539691805839538574e-01 3.000000000000000000e+00 7.300250244140625000e+01 1.322500000000000000e+02 4.825000000000000000e+01
1.100000000000000000e+01 5.733999999999998636e+02 2.485133666992187500e+02 -2.148895263671875000e+00 0.000000000000000000e+00 2.352941274642944336e+00 2.603004882812500000e+03 9.523259401321411133e-01 3.000000000000000000e+00 7.665650939941406250e+01 1.327500000000000000e+02 4.825000000000000000e+01
1.800000000000000000e+01 5.897076923076921275e+02 2.429286346435546875e+02 -2.183471679687500000e+00 0.000000000000000000e+00 2.941176414489746094e+00 2.577323974609375000e+03 9.599298834800720215e-01 3.000000000000000000e+00 4.819078445434570312e+01 1.332500000000000000e+02 4.825000000000000000e+01
5.500000000000000000e+01 6.362230769230768601e+02 2.585967407226562500e+02 -2.246429443359375000e+00 9.999999776482582092e-03 2.470588207244873047e+00 2.466369628906250000e+03 1.418601632118225098e+00 4.000000000000000000e+00 2.419786224365234375e+02 1.347500000000000000e+02 4.825000000000000000e+01
6.600000000000000000e+01 6.469307692307694424e+02 2.861329650878906250e+02 -2.221343994140625000e+00 0.000000000000000000e+00 2.000000000000000000e+00 2.424627685546875000e+03 1.405858755111694336e+00 4.000000000000000000e+00 9.388811492919921875e+01 1.352500000000000000e+02 4.825000000000000000e+01
1.300000000000000000e+01 6.729846153846156085e+02 3.146527404785156250e+02 -2.150177001953125000e+00 0.000000000000000000e+00 2.823529481887817383e+00 2.378128906250000000e+03 1.330545783042907715e+00 3.000000000000000000e+00 4.917332077026367188e+01 1.357500000000000000e+02 4.825000000000000000e+01
5.800000000000000000e+01 6.916615384615386120e+02 3.444281005859375000e+02 -2.079010009765625000e+00 0.000000000000000000e+00 1.352941155433654785e+00 2.331630126953125000e+03 1.190603852272033691e+00 4.000000000000000000e+00 1.592283172607421875e+02 1.362500000000000000e+02 4.825000000000000000e+01
6.700000000000000000e+01 7.201923076923077360e+02 3.672059631347656250e+02 -2.007843017578125000e+00 1.743714362382888794e-01 0.000000000000000000e+00 2.285131347656250000e+03 1.505186438560485840e+00 4.000000000000000000e+00 6.554745483398437500e+02 1.367500000000000000e+02 4.825000000000000000e+01
3.100000000000000000e+01 7.449538461538462570e+02 3.756156005859375000e+02 -1.724395751953125000e+00 9.999999776482582092e-03 5.294117927551269531e-01 2.246103759765625000e+03 1.484740734100341797e+00 3.000000000000000000e+00 6.727680053710937500e+02 1.372500000000000000e+02 4.825000000000000000e+01
7.100000000000000000e+01 7.650692307692303302e+02 3.540086975097656250e+02 -1.370239257812500000e+00 4.162382781505584717e-01 0.000000000000000000e+00 2.209566650390625000e+03 1.389391660690307617e+00 4.000000000000000000e+00 1.134987304687500000e+03 1.377500000000000000e+02 4.825000000000000000e+01
6.200000000000000000e+01 7.580461538461537430e+02 3.170778198242187500e+02 -1.016052246093750000e+00 1.064805388450622559e-01 5.882353186607360840e-01 2.173029541015625000e+03 1.371284723281860352e+00 4.000000000000000000e+00 9.947470092773437500e+02 1.382500000000000000e+02 4.825000000000000000e+01
4.100000000000000000e+01 7.576846153846155403e+02 3.049696960449218750e+02 -6.618652343750000000e-01 2.244719564914703369e-01 0.000000000000000000e+00 2.136492431640625000e+03 9.819746613502502441e-01 3.000000000000000000e+00 1.129400390625000000e+03 1.387500000000000000e+02 4.825000000000000000e+01
3.800000000000000000e+01 7.729230769230769056e+02 3.214169311523437500e+02 -9.176635742187500000e-02 1.139241755008697510e-01 0.000000000000000000e+00 2.091985839843750000e+03 7.611755132675170898e-01 3.000000000000000000e+00 5.906969604492187500e+02 1.392500000000000000e+02 4.825000000000000000e+01
2.200000000000000000e+01 8.310769230769227534e+02 2.875479736328125000e+02 1.044158935546875000e+01 0.000000000000000000e+00 0.000000000000000000e+00 4.287549804687500000e+03 4.305346965789794922e+00 3.000000000000000000e+00 1.146382369995117188e+02 -1.250000000000000000e+00 4.875000000000000000e+01
6.300000000000000000e+01 8.302923076923078725e+02 3.606825256347656250e+02 1.004467773437500000e+01 0.000000000000000000e+00 3.529411852359771729e-01 4.231859863281250000e+03 4.150557518005371094e+00 4.000000000000000000e+00 2.072143859863281250e+02 -2.500000000000000000e-01 4.875000000000000000e+01
2.400000000000000000e+01 8.068999999999998636e+02 3.814268188476562500e+02 9.857086181640625000e+00 0.000000000000000000e+00 0.000000000000000000e+00 4.206871093750000000e+03 4.177470207214355469e+00 3.000000000000000000e+00 2.393958892822265625e+02 2.500000000000000000e-01 4.875000000000000000e+01
6.700000000000000000e+01 6.119846153846154948e+02 2.975904846191406250e+02 9.326904296875000000e+00 0.000000000000000000e+00 6.470588445663452148e-01 4.140472656250000000e+03 4.328861713409423828e+00 4.000000000000000000e+00 1.600381469726562500e+02 1.750000000000000000e+00 4.875000000000000000e+01
9.000000000000000000e+00 9.486769230769231172e+02 3.973378601074218750e+02 7.356536865234375000e+00 0.000000000000000000e+00 0.000000000000000000e+00 3.586428955078125000e+03 4.094519615173339844e+00 1.000000000000000000e+00 2.652880554199218750e+02 5.250000000000000000e+00 4.875000000000000000e+01
1.400000000000000000e+01 7.675615384615382482e+02 3.263263244628906250e+02 6.131561279296875000e+00 0.000000000000000000e+00 2.941176593303680420e-01 3.223342773437500000e+03 4.043042182922363281e+00 3.000000000000000000e+00 2.342649993896484375e+02 6.750000000000000000e+00 4.875000000000000000e+01
9.000000000000000000e+00 7.668384615384612744e+02 3.303364868164062500e+02 5.710144042968750000e+00 0.000000000000000000e+00 0.000000000000000000e+00 3.098362548828125000e+03 3.380013227462768555e+00 1.000000000000000000e+00 2.870726623535156250e+02 7.250000000000000000e+00 4.875000000000000000e+01
6.000000000000000000e+01 8.589692307692311033e+02 4.270464172363281250e+02 4.698547363281250000e+00 0.000000000000000000e+00 0.000000000000000000e+00 2.793626464843750000e+03 3.947457313537597656e+00 4.000000000000000000e+00 4.453951416015625000e+02 8.750000000000000000e+00 4.875000000000000000e+01
2.200000000000000000e+01 7.223923076923076678e+02 3.721718750000000000e+02 4.378173828125000000e+00 0.000000000000000000e+00 0.000000000000000000e+00 2.696728271484375000e+03 3.925261974334716797e+00 3.000000000000000000e+00 3.198298950195312500e+02 9.250000000000000000e+00 4.875000000000000000e+01
6.400000000000000000e+01 7.927999999999998408e+02 4.024946594238281250e+02 4.199279785156250000e+00 0.000000000000000000e+00 0.000000000000000000e+00 2.644475341796875000e+03 3.783544063568115234e+00 4.000000000000000000e+00 4.363846130371093750e+02 9.750000000000000000e+00 4.875000000000000000e+01
2.000000000000000000e+00 7.232615384615384073e+02 3.956765136718750000e+02 4.067535400390625000e+00 0.000000000000000000e+00 0.000000000000000000e+00 2.607104248046875000e+03 3.754407644271850586e+00 1.000000000000000000e+00 5.830314941406250000e+02 1.025000000000000000e+01 4.875000000000000000e+01
4.000000000000000000e+01 7.099461538461534929e+02 3.495876770019531250e+02 3.935791015625000000e+00 0.000000000000000000e+00 0.000000000000000000e+00 2.569733154296875000e+03 3.809122085571289062e+00 3.000000000000000000e+00 4.492292175292968750e+02 1.075000000000000000e+01 4.875000000000000000e+01
1.000000000000000000e+00 6.741000000000001364e+02 3.517558898925781250e+02 3.804046630859375000e+00 0.000000000000000000e+00 5.294117927551269531e-01 2.532362060546875000e+03 3.826215744018554688e+00 1.000000000000000000e+00 3.825678710937500000e+02 1.125000000000000000e+01 4.875000000000000000e+01
6.100000000000000000e+01 6.625538461538463935e+02 3.406492614746093750e+02 3.827026367187500000e+00 0.000000000000000000e+00 2.941176593303680420e-01 2.551830566406250000e+03 3.817986965179443359e+00 4.000000000000000000e+00 4.039571838378906250e+02 1.175000000000000000e+01 4.875000000000000000e+01
4.700000000000000000e+01 9.151461538461545615e+02 4.755444641113281250e+02 3.926177978515625000e+00 0.000000000000000000e+00 0.000000000000000000e+00 2.623242187500000000e+03 3.747866153717041016e+00 4.000000000000000000e+00 4.432265319824218750e+02 1.325000000000000000e+01 4.875000000000000000e+01
6.500000000000000000e+01 9.983769230769231626e+02 4.526147766113281250e+02 4.070098876953125000e+00 0.000000000000000000e+00 0.000000000000000000e+00 2.694737304687500000e+03 3.606558322906494141e+00 4.000000000000000000e+00 7.539492797851562500e+02 1.375000000000000000e+01 4.875000000000000000e+01
7.200000000000000000e+01 7.989692307692306485e+02 3.816020507812500000e+02 4.214019775390625000e+00 0.000000000000000000e+00 0.000000000000000000e+00 2.766232177734375000e+03 3.723692417144775391e+00 4.000000000000000000e+00 6.673542480468750000e+02 1.425000000000000000e+01 4.875000000000000000e+01
2.000000000000000000e+00 6.072769230769227988e+02 2.899077148437500000e+02 5.421661376953125000e+00 0.000000000000000000e+00 5.294117927551269531e-01 3.245272705078125000e+03 3.983803272247314453e+00 1.000000000000000000e+00 2.950008850097656250e+02 1.725000000000000000e+01 4.875000000000000000e+01
2.000000000000000000e+00 7.121076923076924459e+02 2.999795532226562500e+02 5.621429443359375000e+00 0.000000000000000000e+00 2.941176593303680420e-01 3.302010253906250000e+03 3.880292892456054688e+00 1.000000000000000000e+00 2.903883361816406250e+02 1.775000000000000000e+01 4.875000000000000000e+01
9.000000000000000000e+00 9.082230769230772012e+02 3.405382385253906250e+02 6.020904541015625000e+00 0.000000000000000000e+00 0.000000000000000000e+00 3.415485839843750000e+03 2.973714828491210938e+00 1.000000000000000000e+00 5.669634399414062500e+02 1.875000000000000000e+01 4.875000000000000000e+01
6.700000000000000000e+01 9.838769230769230489e+02 5.033106994628906250e+02 6.046752929687500000e+00 0.000000000000000000e+00 0.000000000000000000e+00 3.414703369140625000e+03 2.131097316741943359e+00 4.000000000000000000e+00 7.403771362304687500e+02 1.975000000000000000e+01 4.875000000000000000e+01
7.200000000000000000e+01 8.086230769230769511e+02 3.529804382324218750e+02 6.059661865234375000e+00 0.000000000000000000e+00 0.000000000000000000e+00 3.414312011718750000e+03 9.986097812652587891e-01 4.000000000000000000e+00 7.863342285156250000e+02 2.025000000000000000e+01 4.875000000000000000e+01
7.100000000000000000e+01 8.000307692307694651e+02 3.565557556152343750e+02 6.032745361328125000e+00 0.000000000000000000e+00 0.000000000000000000e+00 3.403697998046875000e+03 2.298966407775878906e+00 4.000000000000000000e+00 6.380078735351562500e+02 2.075000000000000000e+01 4.875000000000000000e+01
7.000000000000000000e+01 9.371307692307701700e+02 3.936502380371093750e+02 5.429199218750000000e+00 0.000000000000000000e+00 0.000000000000000000e+00 3.238980224609375000e+03 1.220113635063171387e+00 4.000000000000000000e+00 6.051536865234375000e+02 2.275000000000000000e+01 4.875000000000000000e+01
2.200000000000000000e+01 9.806307692307692605e+02 3.922417297363281250e+02 5.247222900390625000e+00 0.000000000000000000e+00 0.000000000000000000e+00 3.198521972656250000e+03 2.130409479141235352e+00 3.000000000000000000e+00 7.778074340820312500e+02 2.325000000000000000e+01 4.875000000000000000e+01
7.500000000000000000e+01 1.035207692307692469e+03 3.797062377929687500e+02 5.065277099609375000e+00 0.000000000000000000e+00 0.000000000000000000e+00 3.158063720703125000e+03 1.407634377479553223e+00 4.000000000000000000e+00 8.668582763671875000e+02 2.375000000000000000e+01 4.875000000000000000e+01
4.100000000000000000e+01 9.355307692307695788e+02 3.529499816894531250e+02 4.883300781250000000e+00 0.000000000000000000e+00 5.294117927551269531e-01 3.117605468750000000e+03 3.518195867538452148e+00 3.000000000000000000e+00 5.938258056640625000e+02 2.425000000000000000e+01 4.875000000000000000e+01
2.000000000000000000e+01 5.607538461538459842e+02 2.926079406738281250e+02 5.578948974609375000e+00 0.000000000000000000e+00 2.176470518112182617e+00 3.442104736328125000e+03 3.993390083312988281e+00 3.000000000000000000e+00 2.675043029785156250e+02 2.875000000000000000e+01 4.875000000000000000e+01
1.100000000000000000e+01 5.417307692307691696e+02 2.804229736328125000e+02 6.740905761718750000e+00 0.000000000000000000e+00 2.588235378265380859e+00 3.790261962890625000e+03 4.103211879730224609e+00 3.000000000000000000e+00 5.622257232666015625e+01 3.925000000000000000e+01 4.875000000000000000e+01
9.000000000000000000e+00 4.180307692307693515e+02 2.288612823486328125e+02 6.225067138671875000e+00 0.000000000000000000e+00 2.000000000000000000e+00 3.857707763671875000e+03 4.154403686523437500e+00 1.000000000000000000e+00 9.302765655517578125e+01 4.325000000000000000e+01 4.875000000000000000e+01
1.000000000000000000e+00 3.973615384615386574e+02 2.139314880371093750e+02 6.293975830078125000e+00 0.000000000000000000e+00 2.764705896377563477e+00 3.894855224609375000e+03 4.177157878875732422e+00 1.000000000000000000e+00 9.533286285400390625e+01 4.375000000000000000e+01 4.875000000000000000e+01
3.000000000000000000e+00 3.276846153846154834e+02 1.844702301025390625e+02 6.599792480468750000e+00 0.000000000000000000e+00 2.117647171020507812e+00 4.027524414062500000e+03 4.213184833526611328e+00 1.000000000000000000e+00 1.732542800903320312e+01 4.575000000000000000e+01 4.875000000000000000e+01
0.000000000000000000e+00 2.879384615384616382e+02 1.441242828369140625e+02 6.840423583984375000e+00 0.000000000000000000e+00 8.235294222831726074e-01 4.094758544921875000e+03 4.206234455108642578e+00 1.000000000000000000e+00 4.989234447479248047e+00 4.775000000000000000e+01 4.875000000000000000e+01
0.000000000000000000e+00 2.064999999999998295e+02 1.104547195434570312e+02 5.700683593750000000e+00 0.000000000000000000e+00 8.235294222831726074e-01 3.919675292968750000e+03 4.228152751922607422e+00 1.000000000000000000e+00 3.658690929412841797e+00 5.275000000000000000e+01 4.875000000000000000e+01
0.000000000000000000e+00 2.142923076923078156e+02 1.196246337890625000e+02 5.551300048828125000e+00 0.000000000000000000e+00 1.176470637321472168e+00 3.899142822265625000e+03 4.209534168243408203e+00 1.000000000000000000e+00 1.601351928710937500e+01 5.325000000000000000e+01 4.875000000000000000e+01
0.000000000000000000e+00 2.468076923076923492e+02 1.426741943359375000e+02 5.131286621093750000e+00 0.000000000000000000e+00 1.470588207244873047e+00 3.835542724609375000e+03 4.128936767578125000e+00 1.000000000000000000e+00 9.715058135986328125e+01 5.475000000000000000e+01 4.875000000000000000e+01
0.000000000000000000e+00 2.685769230769230376e+02 1.495163879394531250e+02 4.491088867187500000e+00 0.000000000000000000e+00 1.941176414489746094e+00 3.706932861328125000e+03 3.990308046340942383e+00 1.000000000000000000e+00 2.248774719238281250e+02 5.725000000000000000e+01 4.875000000000000000e+01
1.000000000000000000e+00 2.570769230769230944e+02 1.425742187500000000e+02 4.338928222656250000e+00 0.000000000000000000e+00 2.000000000000000000e+00 3.677431396484375000e+03 3.979861021041870117e+00 1.000000000000000000e+00 2.581745910644531250e+02 5.775000000000000000e+01 4.875000000000000000e+01
0.000000000000000000e+00 2.541000000000000796e+02 1.345783996582031250e+02 4.195434570312500000e+00 0.000000000000000000e+00 1.647058844566345215e+00 3.651940673828125000e+03 3.936486244201660156e+00 1.000000000000000000e+00 2.637667541503906250e+02 5.825000000000000000e+01 4.875000000000000000e+01
1.000000000000000000e+00 2.495153846153845905e+02 1.304935607910156250e+02 4.077972412109375000e+00 0.000000000000000000e+00 2.000000000000000000e+00 3.638482177734375000e+03 3.899705648422241211e+00 1.000000000000000000e+00 4.671242370605468750e+02 5.875000000000000000e+01 4.875000000000000000e+01
0.000000000000000000e+00 2.244230769230768772e+02 1.299747467041015625e+02 3.960510253906250000e+00 0.000000000000000000e+00 1.588235259056091309e+00 3.625023681640625000e+03 3.957919359207153320e+00 1.000000000000000000e+00 2.357583160400390625e+02 5.925000000000000000e+01 4.875000000000000000e+01
1.000000000000000000e+00 2.146230769230767805e+02 1.272453002929687500e+02 3.843048095703125000e+00 0.000000000000000000e+00 1.058823585510253906e+00 3.611564941406250000e+03 3.997015714645385742e+00 1.000000000000000000e+00 1.920805206298828125e+02 5.975000000000000000e+01 4.875000000000000000e+01
0.000000000000000000e+00 2.063769230769231910e+02 1.194819030761718750e+02 3.790100097656250000e+00 0.000000000000000000e+00 9.411764740943908691e-01 3.610425048828125000e+03 4.019427776336669922e+00 1.000000000000000000e+00 1.546898498535156250e+02 6.025000000000000000e+01 4.875000000000000000e+01
0.000000000000000000e+00 1.754692307692307907e+02 9.943076324462890625e+01 3.824859619140625000e+00 0.000000000000000000e+00 8.823529481887817383e-01 3.643959960937500000e+03 4.097178936004638672e+00 1.000000000000000000e+00 8.635418701171875000e+01 6.175000000000000000e+01 4.875000000000000000e+01
1.000000000000000000e+00 1.974307692307692719e+02 1.060552673339843750e+02 3.920806884765625000e+00 0.000000000000000000e+00 1.352941155433654785e+00 3.531839843750000000e+03 3.800927877426147461e+00 1.000000000000000000e+00 4.501795349121093750e+02 6.675000000000000000e+01 4.875000000000000000e+01
0.000000000000000000e+00 2.095846153846154891e+02 1.063965682983398438e+02 3.755065917968750000e+00 0.000000000000000000e+00 1.588235259056091309e+00 3.477925048828125000e+03 3.736201763153076172e+00 1.000000000000000000e+00 5.828466796875000000e+02 6.725000000000000000e+01 4.875000000000000000e+01
1.000000000000000000e+00 2.101846153846153129e+02 9.815820312500000000e+01 3.293029785156250000e+00 0.000000000000000000e+00 5.882353186607360840e-01 3.364526367187500000e+03 3.782498598098754883e+00 1.000000000000000000e+00 4.824386291503906250e+02 6.825000000000000000e+01 4.875000000000000000e+01
5.000000000000000000e+00 2.100307692307692093e+02 9.455705261230468750e+01 3.040252685546875000e+00 0.000000000000000000e+00 8.235294222831726074e-01 3.306898681640625000e+03 3.796820640563964844e+00 1.000000000000000000e+00 4.438422546386718750e+02 6.875000000000000000e+01 4.875000000000000000e+01
1.000000000000000000e+00 2.255307692307692378e+02 9.735177612304687500e+01 2.515136718750000000e+00 0.000000000000000000e+00 1.176470637321472168e+00 3.203441162109375000e+03 3.805479049682617188e+00 1.000000000000000000e+00 4.695184631347656250e+02 6.975000000000000000e+01 4.875000000000000000e+01
1.000000000000000000e+00 2.301769230769229750e+02 1.116016998291015625e+02 2.236328125000000000e+00 0.000000000000000000e+00 1.470588207244873047e+00 3.161543701171875000e+03 3.807369947433471680e+00 1.000000000000000000e+00 4.188388977050781250e+02 7.025000000000000000e+01 4.875000000000000000e+01
0.000000000000000000e+00 2.411307692307692037e+02 1.372467193603515625e+02 1.957489013671875000e+00 0.000000000000000000e+00 1.941176414489746094e+00 3.119646240234375000e+03 3.805594921112060547e+00 1.000000000000000000e+00 4.902462158203125000e+02 7.075000000000000000e+01 4.875000000000000000e+01
0.000000000000000000e+00 2.473692307692307395e+02 1.633751525878906250e+02 1.678680419921875000e+00 0.000000000000000000e+00 1.705882310867309570e+00 3.077748779296875000e+03 3.781024694442749023e+00 1.000000000000000000e+00 5.183723754882812500e+02 7.125000000000000000e+01 4.875000000000000000e+01
0.000000000000000000e+00 2.574538461538462570e+02 1.791175079345703125e+02 1.477386474609375000e+00 0.000000000000000000e+00 9.411764740943908691e-01 3.062525634765625000e+03 3.766749858856201172e+00 1.000000000000000000e+00 5.117738647460937500e+02 7.175000000000000000e+01 4.875000000000000000e+01
1.000000000000000000e+00 2.855461538461539135e+02 1.877837829589843750e+02 1.074829101562500000e+00 0.000000000000000000e+00 1.411764740943908691e+00 3.032079589843750000e+03 3.636430025100708008e+00 1.000000000000000000e+00 6.199097900390625000e+02 7.275000000000000000e+01 4.875000000000000000e+01
1.000000000000000000e+00 2.945846153846154607e+02 1.851511535644531250e+02 8.866577148437500000e-01 0.000000000000000000e+00 1.882352948188781738e+00 3.018856445312500000e+03 3.542358636856079102e+00 1.000000000000000000e+00 8.026784667968750000e+02 7.325000000000000000e+01 4.875000000000000000e+01
1.000000000000000000e+00 2.770461538461539135e+02 1.717548675537109375e+02 7.378234863281250000e-01 0.000000000000000000e+00 5.882353186607360840e-01 3.011633300781250000e+03 3.510336160659790039e+00 1.000000000000000000e+00 7.513841552734375000e+02 7.375000000000000000e+01 4.875000000000000000e+01
2.000000000000000000e+00 2.752461538461539021e+02 1.559112548828125000e+02 5.889892578125000000e-01 0.000000000000000000e+00 1.294117689132690430e+00 3.004409912109375000e+03 3.461699485778808594e+00 1.000000000000000000e+00 8.816591186523437500e+02 7.425000000000000000e+01 4.875000000000000000e+01
2.000000000000000000e+00 2.703307692307693060e+02 1.423403320312500000e+02 4.401550292968750000e-01 0.000000000000000000e+00 1.235294103622436523e+00 2.997186767578125000e+03 3.421648025512695312e+00 1.000000000000000000e+00 9.744519042968750000e+02 7.475000000000000000e+01 4.875000000000000000e+01
1.000000000000000000e+00 2.562769230769230830e+02 1.337312164306640625e+02 3.098449707031250000e-01 0.000000000000000000e+00 9.411764740943908691e-01 2.991776123046875000e+03 3.473245620727539062e+00 1.000000000000000000e+00 9.358063354492187500e+02 7.525000000000000000e+01 4.875000000000000000e+01
2.000000000000000000e+00 2.622769230769231967e+02 1.132227249145507812e+02 8.630371093750000000e-02 0.000000000000000000e+00 5.882353186607360840e-01 2.984580322265625000e+03 3.552592992782592773e+00 1.000000000000000000e+00 9.383355102539062500e+02 7.625000000000000000e+01 4.875000000000000000e+01
0.000000000000000000e+00 2.610307692307693515e+02 1.006427841186523438e+02 -2.545166015625000000e-02 0.000000000000000000e+00 1.235294103622436523e+00 2.980982421875000000e+03 3.613113403320312500e+00 1.000000000000000000e+00 8.203183593750000000e+02 7.675000000000000000e+01 4.875000000000000000e+01
2.000000000000000000e+00 2.710230769230769283e+02 9.300434875488281250e+01 -9.237670898437500000e-02 0.000000000000000000e+00 4.705882370471954346e-01 2.973490966796875000e+03 3.610159397125244141e+00 1.000000000000000000e+00 8.667521362304687500e+02 7.725000000000000000e+01 4.875000000000000000e+01
2.000000000000000000e+00 2.731461538461537657e+02 9.610412597656250000e+01 -1.443176269531250000e-01 0.000000000000000000e+00 1.117647051811218262e+00 2.964701416015625000e+03 3.628228425979614258e+00 1.000000000000000000e+00 8.510539550781250000e+02 7.775000000000000000e+01 4.875000000000000000e+01
1.000000000000000000e+00 2.977153846153845507e+02 1.042834243774414062e+02 -1.962585449218750000e-01 0.000000000000000000e+00 1.470588207244873047e+00 2.955911865234375000e+03 3.557188034057617188e+00 1.000000000000000000e+00 8.759351196289062500e+02 7.825000000000000000e+01 4.875000000000000000e+01
2.000000000000000000e+00 3.282923076923076451e+02 1.301208343505859375e+02 -7.229614257812500000e-02 0.000000000000000000e+00 8.823529481887817383e-01 2.925722900390625000e+03 3.530720233917236328e+00 1.000000000000000000e+00 8.523991699218750000e+02 7.925000000000000000e+01 4.875000000000000000e+01
1.000000000000000000e+00 3.487615384615382936e+02 1.391159667968750000e+02 1.036071777343750000e-01 0.000000000000000000e+00 0.000000000000000000e+00 2.904323242187500000e+03 3.576489686965942383e+00 1.000000000000000000e+00 5.933172607421875000e+02 7.975000000000000000e+01 4.875000000000000000e+01
0.000000000000000000e+00 3.594153846153849372e+02 1.485338287353515625e+02 2.795104980468750000e-01 0.000000000000000000e+00 8.235294222831726074e-01 2.882923828125000000e+03 3.628516197204589844e+00 1.000000000000000000e+00 6.430574340820312500e+02 8.025000000000000000e+01 4.875000000000000000e+01
4.000000000000000000e+00 3.384384615384615813e+02 1.586403503417968750e+02 4.556884765625000000e-01 0.000000000000000000e+00 8.823529481887817383e-01 2.715991943359375000e+03 3.625897645950317383e+00 1.000000000000000000e+00 6.803558349609375000e+02 8.175000000000000000e+01 4.875000000000000000e+01
2.000000000000000000e+00 2.978999999999999773e+02 1.576952209472656250e+02 4.753112792968750000e-01 0.000000000000000000e+00 1.411764740943908691e+00 2.648933349609375000e+03 3.722450971603393555e+00 1.000000000000000000e+00 5.621606445312500000e+02 8.225000000000000000e+01 4.875000000000000000e+01
4.000000000000000000e+00 3.427307692307691696e+02 1.766322784423828125e+02 -8.405151367187500000e-01 0.000000000000000000e+00 1.176470637321472168e+00 2.258482421875000000e+03 1.032659634947776794e-01 1.000000000000000000e+00 7.129018554687500000e+02 8.375000000000000000e+01 4.875000000000000000e+01
1.100000000000000000e+01 4.426923076923075655e+02 1.768145599365234375e+02 -3.557922363281250000e+00 6.138626933097839355e-01 5.882352963089942932e-02 1.782499145507812500e+03 2.858255624771118164e+00 3.000000000000000000e+00 1.929078735351562500e+03 8.525000000000000000e+01 4.875000000000000000e+01
2.000000000000000000e+00 1.454461538461538908e+02 5.938241577148437500e+01 -8.973327636718750000e+00 1.334229856729507446e-01 0.000000000000000000e+00 1.331899291992187500e+03 2.650773525238037109e+00 1.000000000000000000e+00 1.652803222656250000e+03 9.125000000000000000e+01 4.875000000000000000e+01
2.000000000000000000e+00 2.349000000000000625e+02 8.374294281005859375e+01 -6.246490478515625000e+00 4.319573342800140381e-01 0.000000000000000000e+00 1.449899047851562500e+03 2.582220077514648438e+00 1.000000000000000000e+00 1.882958374023437500e+03 9.725000000000000000e+01 4.875000000000000000e+01
2.000000000000000000e+00 2.293615384615385437e+02 8.884896087646484375e+01 -6.748992919921875000e+00 3.324413597583770752e-01 0.000000000000000000e+00 1.412700683593750000e+03 2.146114110946655273e+00 1.000000000000000000e+00 1.773028320312500000e+03 9.775000000000000000e+01 4.875000000000000000e+01
5.000000000000000000e+00 2.479769230769230717e+02 9.244376373291015625e+01 -7.119720458984375000e+00 3.915046751499176025e-01 0.000000000000000000e+00 1.395050292968750000e+03 2.491815328598022461e+00 1.000000000000000000e+00 1.740300170898437500e+03 9.825000000000000000e+01 4.875000000000000000e+01
5.000000000000000000e+00 2.484538461538462002e+02 9.365436553955078125e+01 -7.490447998046875000e+00 5.004229545593261719e-01 5.294117927551269531e-01 1.377399780273437500e+03 2.484940528869628906e+00 1.000000000000000000e+00 1.900147338867187500e+03 9.875000000000000000e+01 4.875000000000000000e+01
1.000000000000000000e+00 2.473769230769232195e+02 1.079891891479492188e+02 -7.694641113281250000e+00 3.421912491321563721e-01 0.000000000000000000e+00 1.400370849609375000e+03 2.573342561721801758e+00 1.000000000000000000e+00 1.705858154296875000e+03 9.975000000000000000e+01 4.875000000000000000e+01
5.000000000000000000e+00 2.649538461538460865e+02 1.128999862670898438e+02 -7.349029541015625000e+00 2.335811257362365723e-01 0.000000000000000000e+00 1.460416381835937500e+03 2.617710113525390625e+00 1.000000000000000000e+00 1.753261718750000000e+03 1.002500000000000000e+02 4.875000000000000000e+01
4.000000000000000000e+00 2.638384615384615586e+02 1.144549484252929688e+02 -6.657775878906250000e+00 1.731244772672653198e-01 0.000000000000000000e+00 1.580507202148437500e+03 2.745449781417846680e+00 1.000000000000000000e+00 1.613442260742187500e+03 1.012500000000000000e+02 4.875000000000000000e+01
5.000000000000000000e+00 3.277230769230769738e+02 1.197771453857421875e+02 -3.605194091796875000e+00 9.999999776482582092e-03 2.352941185235977173e-01 2.045005249023437500e+03 2.939175367355346680e+00 1.000000000000000000e+00 1.163294799804687500e+03 1.037500000000000000e+02 4.875000000000000000e+01
1.000000000000000000e+00 2.775923076923077133e+02 1.151787948608398438e+02 -3.552947998046875000e+00 0.000000000000000000e+00 5.294117927551269531e-01 2.146843505859375000e+03 2.961178541183471680e+00 1.000000000000000000e+00 9.210199584960937500e+02 1.062500000000000000e+02 4.875000000000000000e+01
1.400000000000000000e+01 3.149230769230769056e+02 1.101000366210937500e+02 -4.382385253906250000e+00 2.776496708393096924e-01 1.941176414489746094e+00 2.093033203125000000e+03 1.606372356414794922e+00 3.000000000000000000e+00 1.588831542968750000e+03 1.072500000000000000e+02 4.875000000000000000e+01
4.700000000000000000e+01 3.475846153846154607e+02 1.091397628784179688e+02 -4.980895996093750000e+00 4.133544266223907471e-01 5.882353186607360840e-01 2.053272216796875000e+03 2.263291358947753906e+00 4.000000000000000000e+00 1.484087646484375000e+03 1.077500000000000000e+02 4.875000000000000000e+01
5.800000000000000000e+01 3.800384615384616041e+02 1.077072906494140625e+02 -5.579437255859375000e+00 6.050509810447692871e-01 1.176470637321472168e+00 2.013511230468750000e+03 2.576897859573364258e+00 4.000000000000000000e+00 1.798877197265625000e+03 1.082500000000000000e+02 4.875000000000000000e+01
3.700000000000000000e+01 3.681461538461538225e+02 1.024174270629882812e+02 -6.177947998046875000e+00 7.616062760353088379e-01 3.529411852359771729e-01 1.973750244140625000e+03 2.655885457992553711e+00 3.000000000000000000e+00 1.992347167968750000e+03 1.087500000000000000e+02 4.875000000000000000e+01
2.200000000000000000e+01 3.684461538461536634e+02 9.047219848632812500e+01 -6.163055419921875000e+00 7.806743979454040527e-01 1.058823585510253906e+00 1.995981201171875000e+03 1.460065960884094238e+00 3.000000000000000000e+00 1.856186157226562500e+03 1.092500000000000000e+02 4.875000000000000000e+01
3.100000000000000000e+01 3.478076923076921503e+02 7.598471069335937500e+01 -6.148132324218750000e+00 4.239073097705841064e-01 8.823529481887817383e-01 2.018212158203125000e+03 2.447429418563842773e+00 3.000000000000000000e+00 1.428719482421875000e+03 1.097500000000000000e+02 4.875000000000000000e+01
0.000000000000000000e+00 3.245307692307693515e+02 6.802280426025390625e+01 -6.133239746093750000e+00 2.837033867835998535e-01 1.235294103622436523e+00 2.040443237304687500e+03 2.907964229583740234e+00 1.000000000000000000e+00 1.218442504882812500e+03 1.102500000000000000e+02 4.875000000000000000e+01
3.000000000000000000e+00 2.823384615384617291e+02 8.544494628906250000e+01 -5.115386962890625000e+00 1.885765492916107178e-01 1.823529362678527832e+00 2.287376220703125000e+03 3.026335000991821289e+00 1.000000000000000000e+00 1.186087646484375000e+03 1.117500000000000000e+02 4.875000000000000000e+01
5.000000000000000000e+00 2.793923076923077815e+02 9.633473968505859375e+01 -4.667999267578125000e+00 1.094906851649284363e-01 2.294117689132690430e+00 2.389713623046875000e+03 3.064548492431640625e+00 1.000000000000000000e+00 1.132838745117187500e+03 1.122500000000000000e+02 4.875000000000000000e+01
4.000000000000000000e+00 2.665692307692306713e+02 1.003593978881835938e+02 -4.095306396484375000e+00 9.999999776482582092e-03 7.058823704719543457e-01 2.494398925781250000e+03 3.135487318038940430e+00 1.000000000000000000e+00 9.974669799804687500e+02 1.127500000000000000e+02 4.875000000000000000e+01
0.000000000000000000e+00 2.622692307692307168e+02 1.157885208129882812e+02 -2.352569580078125000e+00 9.999999776482582092e-03 4.705882370471954346e-01 2.746732421875000000e+03 3.438571691513061523e+00 1.000000000000000000e+00 5.960941772460937500e+02 1.182500000000000000e+02 4.875000000000000000e+01
0.000000000000000000e+00 2.798538461538462343e+02 1.258629608154296875e+02 -2.761138916015625000e+00 9.999999776482582092e-03 2.941176593303680420e-01 2.688354492187500000e+03 3.411821842193603516e+00 1.000000000000000000e+00 7.032521972656250000e+02 1.187500000000000000e+02 4.875000000000000000e+01
3.000000000000000000e+00 2.971461538461537657e+02 1.372316284179687500e+02 -3.169708251953125000e+00 9.999999776482582092e-03 1.647058844566345215e+00 2.629976562500000000e+03 3.374418020248413086e+00 1.000000000000000000e+00 6.957294921875000000e+02 1.192500000000000000e+02 4.875000000000000000e+01
4.000000000000000000e+00 3.536230769230767237e+02 1.609394531250000000e+02 -3.733215332031250000e+00 9.999999776482582092e-03 2.352941185235977173e-01 2.547182373046875000e+03 1.670337557792663574e+00 1.000000000000000000e+00 7.977576293945312500e+02 1.202500000000000000e+02 4.875000000000000000e+01
3.300000000000000000e+01 4.087000000000000455e+02 1.860072937011718750e+02 -3.535858154296875000e+00 1.656921058893203735e-01 1.058823585510253906e+00 2.566273437500000000e+03 1.584011554718017578e+00 3.000000000000000000e+00 9.058964843750000000e+02 1.212500000000000000e+02 4.875000000000000000e+01
4.200000000000000000e+01 4.250692307692306144e+02 1.940319671630859375e+02 -3.437164306640625000e+00 1.752243936061859131e-01 2.941176593303680420e-01 2.575819091796875000e+03 7.997261285781860352e-01 3.000000000000000000e+00 9.110396728515625000e+02 1.217500000000000000e+02 4.875000000000000000e+01
5.100000000000000000e+01 4.376384615384616268e+02 1.929240875244140625e+02 -3.186553955078125000e+00 1.509736776351928711e-01 0.000000000000000000e+00 2.607632080078125000e+03 8.205758333206176758e-01 4.000000000000000000e+00 8.448968505859375000e+02 1.222500000000000000e+02 4.875000000000000000e+01
1.200000000000000000e+01 4.360461538461540840e+02 1.969175872802734375e+02 -2.885314941406250000e+00 0.000000000000000000e+00 5.294117927551269531e-01 2.646867187500000000e+03 8.466558456420898438e-01 3.000000000000000000e+00 5.380734252929687500e+02 1.227500000000000000e+02 4.875000000000000000e+01
2.100000000000000000e+01 4.487384615384614222e+02 1.973204803466796875e+02 -2.584075927734375000e+00 9.999999776482582092e-03 4.705882370471954346e-01 2.686102539062500000e+03 1.195628523826599121e+00 3.000000000000000000e+00 4.548750000000000000e+02 1.232500000000000000e+02 4.875000000000000000e+01
1.300000000000000000e+01 4.516461538461537657e+02 1.948622436523437500e+02 -2.282806396484375000e+00 0.000000000000000000e+00 1.529411792755126953e+00 2.725337890625000000e+03 1.046503305435180664e+00 3.000000000000000000e+00 3.541383666992187500e+02 1.237500000000000000e+02 4.875000000000000000e+01
3.000000000000000000e+00 4.622153846153844370e+02 1.931810913085937500e+02 -1.770721435546875000e+00 0.000000000000000000e+00 1.117647051811218262e+00 2.793963623046875000e+03 2.232614040374755859e+00 1.000000000000000000e+00 2.974283447265625000e+02 1.252500000000000000e+02 4.875000000000000000e+01
3.700000000000000000e+01 4.793230769230771102e+02 1.997464599609375000e+02 -1.637329101562500000e+00 0.000000000000000000e+00 2.117647171020507812e+00 2.808835449218750000e+03 1.218032002449035645e+00 3.000000000000000000e+00 3.728779602050781250e+02 1.257500000000000000e+02 4.875000000000000000e+01
2.000000000000000000e+01 5.013615384615384301e+02 2.074692687988281250e+02 -1.615783691406250000e+00 0.000000000000000000e+00 1.000000000000000000e+00 2.799696289062500000e+03 1.800405383110046387e+00 3.000000000000000000e+00 3.104862365722656250e+02 1.262500000000000000e+02 4.875000000000000000e+01
5.000000000000000000e+00 5.197153846153846644e+02 2.179283447265625000e+02 -1.594238281250000000e+00 0.000000000000000000e+00 2.176470518112182617e+00 2.790557373046875000e+03 1.711388826370239258e+00 1.000000000000000000e+00 3.177929382324218750e+02 1.267500000000000000e+02 4.875000000000000000e+01
3.700000000000000000e+01 5.399538461538462570e+02 2.278140411376953125e+02 -1.572723388671875000e+00 0.000000000000000000e+00 1.882352948188781738e+00 2.781418457031250000e+03 9.065559506416320801e-01 3.000000000000000000e+00 4.226398620605468750e+02 1.272500000000000000e+02 4.875000000000000000e+01
6.100000000000000000e+01 5.601153846153848690e+02 2.390442047119140625e+02 -1.644287109375000000e+00 0.000000000000000000e+00 6.470588445663452148e-01 2.762931152343750000e+03 8.950195312500000000e-01 4.000000000000000000e+00 3.794210510253906250e+02 1.277500000000000000e+02 4.875000000000000000e+01
5.500000000000000000e+01 5.831538461538467573e+02 2.461213378906250000e+02 -1.808959960937500000e+00 1.041163131594657898e-01 0.000000000000000000e+00 2.735095947265625000e+03 8.650980591773986816e-01 4.000000000000000000e+00 5.136002807617187500e+02 1.282500000000000000e+02 4.875000000000000000e+01
3.100000000000000000e+01 5.911230769230768374e+02 2.509698181152343750e+02 -1.973663330078125000e+00 9.999999776482582092e-03 1.470588207244873047e+00 2.707260498046875000e+03 8.697634339332580566e-01 3.000000000000000000e+00 4.040346069335937500e+02 1.287500000000000000e+02 4.875000000000000000e+01
6.000000000000000000e+01 5.926999999999998181e+02 2.519765472412109375e+02 -2.138336181640625000e+00 9.999999776482582092e-03 9.411764740943908691e-01 2.679425292968750000e+03 8.790791034698486328e-01 4.000000000000000000e+00 4.187668457031250000e+02 1.292500000000000000e+02 4.875000000000000000e+01
5.500000000000000000e+01 5.960692307692305576e+02 2.495607452392578125e+02 -2.248107910156250000e+00 9.999999776482582092e-03 3.529411852359771729e-01 2.655598876953125000e+03 8.918390870094299316e-01 4.000000000000000000e+00 4.175997314453125000e+02 1.297500000000000000e+02 4.875000000000000000e+01
5.300000000000000000e+01 5.936923076923076223e+02 2.450918884277343750e+02 -2.339569091796875000e+00 9.999999776482582092e-03 1.529411792755126953e+00 2.633108642578125000e+03 9.079189300537109375e-01 4.000000000000000000e+00 3.368863220214843750e+02 1.302500000000000000e+02 4.875000000000000000e+01
6.500000000000000000e+01 5.843076923076923777e+02 2.549156799316406250e+02 -2.431060791015625000e+00 9.999999776482582092e-03 1.529411792755126953e+00 2.610618652343750000e+03 9.168852567672729492e-01 4.000000000000000000e+00 4.320120849609375000e+02 1.307500000000000000e+02 4.875000000000000000e+01
5.200000000000000000e+01 5.887461538461540158e+02 2.744902954101562500e+02 -2.522521972656250000e+00 9.999999776482582092e-03 2.941176593303680420e-01 2.588128662109375000e+03 9.625232815742492676e-01 4.000000000000000000e+00 2.957924499511718750e+02 1.312500000000000000e+02 4.875000000000000000e+01
5.900000000000000000e+01 5.837230769230769738e+02 2.810313415527343750e+02 -2.602142333984375000e+00 9.999999776482582092e-03 6.470588445663452148e-01 2.561414794921875000e+03 1.634578227996826172e+00 4.000000000000000000e+00 3.707588806152343750e+02 1.317500000000000000e+02 4.875000000000000000e+01
4.500000000000000000e+01 5.816461538461539931e+02 2.872648925781250000e+02 -2.681732177734375000e+00 0.000000000000000000e+00 1.470588207244873047e+00 2.534700683593750000e+03 9.296483993530273438e-01 4.000000000000000000e+00 2.070680541992187500e+02 1.322500000000000000e+02 4.875000000000000000e+01
3.700000000000000000e+01 5.991615384615386120e+02 2.977686462402343750e+02 -2.761352539062500000e+00 0.000000000000000000e+00 1.000000000000000000e+00 2.507986816406250000e+03 9.301272034645080566e-01 3.000000000000000000e+00 1.912708435058593750e+02 1.327500000000000000e+02 4.875000000000000000e+01
2.300000000000000000e+01 6.044000000000000909e+02 2.866163940429687500e+02 -2.832061767578125000e+00 0.000000000000000000e+00 1.647058844566345215e+00 2.479247070312500000e+03 9.464565515518188477e-01 3.000000000000000000e+00 6.601342773437500000e+01 1.332500000000000000e+02 4.875000000000000000e+01
3.800000000000000000e+01 6.189999999999998863e+02 2.657882385253906250e+02 -2.876129150390625000e+00 0.000000000000000000e+00 1.941176414489746094e+00 2.444429687500000000e+03 9.497585296630859375e-01 3.000000000000000000e+00 5.062704849243164062e+01 1.337500000000000000e+02 4.875000000000000000e+01
1.300000000000000000e+01 6.227000000000002728e+02 2.672031250000000000e+02 -2.964263916015625000e+00 0.000000000000000000e+00 2.411764621734619141e+00 2.374794433593750000e+03 1.514251351356506348e+00 3.000000000000000000e+00 5.530027770996093750e+01 1.347500000000000000e+02 4.875000000000000000e+01
6.700000000000000000e+01 6.807538461538459842e+02 3.398440246582031250e+02 -2.768371582031250000e+00 9.999999776482582092e-03 5.882353186607360840e-01 2.224756347656250000e+03 1.003840804100036621e+00 4.000000000000000000e+00 2.925117797851562500e+02 1.367500000000000000e+02 4.875000000000000000e+01
6.100000000000000000e+01 7.002307692307690559e+02 3.627339477539062500e+02 -2.532989501953125000e+00 9.999999776482582092e-03 0.000000000000000000e+00 2.190232910156250000e+03 1.740066289901733398e+00 4.000000000000000000e+00 6.090530395507812500e+02 1.372500000000000000e+02 4.875000000000000000e+01
6.800000000000000000e+01 7.318307692307693060e+02 3.537529602050781250e+02 -2.239868164062500000e+00 1.947551220655441284e-01 5.882352963089942932e-02 2.156833251953125000e+03 1.403910279273986816e+00 4.000000000000000000e+00 9.011267089843750000e+02 1.377500000000000000e+02 4.875000000000000000e+01
2.800000000000000000e+01 7.355615384615383618e+02 3.222984924316406250e+02 -1.946777343750000000e+00 1.856708973646163940e-01 1.000000000000000000e+00 2.123433349609375000e+03 1.325450658798217773e+00 3.000000000000000000e+00 7.992079467773437500e+02 1.382500000000000000e+02 4.875000000000000000e+01
5.500000000000000000e+01 7.337000000000005002e+02 2.964082641601562500e+02 -1.653686523437500000e+00 3.171688318252563477e-01 8.235294222831726074e-01 2.090033691406250000e+03 9.125339388847351074e-01 4.000000000000000000e+00 8.177685546875000000e+02 1.387500000000000000e+02 4.875000000000000000e+01
5.500000000000000000e+01 7.651000000000002501e+02 3.422026367187500000e+02 -4.567565917968750000e-01 0.000000000000000000e+00 9.411764740943908691e-01 1.964515380859375000e+03 1.536420464515686035e+00 4.000000000000000000e+00 4.524210510253906250e+02 1.397500000000000000e+02 4.875000000000000000e+01
2.100000000000000000e+01 8.312230769230765191e+02 4.199640197753906250e+02 1.444610595703125000e+00 0.000000000000000000e+00 0.000000000000000000e+00 1.932034790039062500e+03 7.641925215721130371e-01 3.000000000000000000e+00 1.768403930664062500e+02 1.422500000000000000e+02 4.875000000000000000e+01
1.100000000000000000e+01 7.865000000000002274e+02 3.550684204101562500e+02 7.076965332031250000e+00 0.000000000000000000e+00 2.941176593303680420e-01 3.484964843750000000e+03 4.064043998718261719e+00 3.000000000000000000e+00 1.977832031250000000e+02 6.250000000000000000e+00 4.925000000000000000e+01
7.200000000000000000e+01 7.328076923076921503e+02 3.730306396484375000e+02 6.358825683593750000e+00 0.000000000000000000e+00 0.000000000000000000e+00 3.274874267578125000e+03 4.027193546295166016e+00 4.000000000000000000e+00 2.618230590820312500e+02 7.250000000000000000e+00 4.925000000000000000e+01
6.900000000000000000e+01 7.396384615384612289e+02 3.515303344726562500e+02 6.041198730468750000e+00 0.000000000000000000e+00 0.000000000000000000e+00 3.180949707031250000e+03 3.132150173187255859e+00 4.000000000000000000e+00 3.874002990722656250e+02 7.750000000000000000e+00 4.925000000000000000e+01
3.000000000000000000e+00 7.062461538461537884e+02 3.761242065429687500e+02 5.043060302734375000e+00 0.000000000000000000e+00 0.000000000000000000e+00 2.883669677734375000e+03 3.844787359237670898e+00 1.000000000000000000e+00 3.806038208007812500e+02 9.750000000000000000e+00 4.925000000000000000e+01
6.900000000000000000e+01 6.268076923076923777e+02 3.471453247070312500e+02 4.640960693359375000e+00 0.000000000000000000e+00 0.000000000000000000e+00 2.771000976562500000e+03 3.801905393600463867e+00 4.000000000000000000e+00 4.148541259765625000e+02 1.125000000000000000e+01 4.925000000000000000e+01
4.900000000000000000e+01 6.973769230769225942e+02 3.459014587402343750e+02 4.637451171875000000e+00 0.000000000000000000e+00 0.000000000000000000e+00 2.780946533203125000e+03 3.784752607345581055e+00 4.000000000000000000e+00 5.239603271484375000e+02 1.175000000000000000e+01 4.925000000000000000e+01
3.800000000000000000e+01 7.340461538461541977e+02 3.673511352539062500e+02 4.633911132812500000e+00 0.000000000000000000e+00 0.000000000000000000e+00 2.790892089843750000e+03 3.754843473434448242e+00 3.000000000000000000e+00 4.070978088378906250e+02 1.225000000000000000e+01 4.925000000000000000e+01
4.300000000000000000e+01 8.669230769230766782e+02 5.320314331054687500e+02 4.646636962890625000e+00 0.000000000000000000e+00 2.352941185235977173e-01 2.820843505859375000e+03 3.207856178283691406e+00 3.000000000000000000e+00 6.762425537109375000e+02 1.325000000000000000e+01 4.925000000000000000e+01
7.300000000000000000e+01 5.985153846153847326e+02 2.792274475097656250e+02 5.378753662109375000e+00 0.000000000000000000e+00 0.000000000000000000e+00 3.214325195312500000e+03 3.825986385345458984e+00 4.000000000000000000e+00 4.058105468750000000e+02 1.675000000000000000e+01 4.925000000000000000e+01
7.200000000000000000e+01 9.689923076923079179e+02 4.250362243652343750e+02 5.783966064453125000e+00 0.000000000000000000e+00 0.000000000000000000e+00 3.343675292968750000e+03 3.587132930755615234e+00 4.000000000000000000e+00 6.421373291015625000e+02 1.825000000000000000e+01 4.925000000000000000e+01
6.300000000000000000e+01 1.067715384615384437e+03 4.300160827636718750e+02 5.919189453125000000e+00 0.000000000000000000e+00 0.000000000000000000e+00 3.385053955078125000e+03 3.459155321121215820e+00 4.000000000000000000e+00 4.061841125488281250e+02 1.875000000000000000e+01 4.925000000000000000e+01
7.500000000000000000e+01 1.072484615384615381e+03 5.100968627929687500e+02 5.899658203125000000e+00 0.000000000000000000e+00 0.000000000000000000e+00 3.378237304687500000e+03 3.234102725982666016e+00 4.000000000000000000e+00 7.465970458984375000e+02 1.925000000000000000e+01 4.925000000000000000e+01
7.600000000000000000e+01 1.115784615384615336e+03 5.307050170898437500e+02 5.880126953125000000e+00 0.000000000000000000e+00 0.000000000000000000e+00 3.371420410156250000e+03 3.282422304153442383e+00 4.000000000000000000e+00 1.155485839843750000e+03 1.975000000000000000e+01 4.925000000000000000e+01
1.000000000000000000e+01 1.027338461538461388e+03 5.638863525390625000e+02 5.860595703125000000e+00 0.000000000000000000e+00 0.000000000000000000e+00 3.364603759765625000e+03 3.195053815841674805e+00 3.000000000000000000e+00 1.427729370117187500e+03 2.025000000000000000e+01 4.925000000000000000e+01
7.000000000000000000e+01 8.275076923076921958e+02 4.362926635742187500e+02 5.816894531250000000e+00 0.000000000000000000e+00 0.000000000000000000e+00 3.350826171875000000e+03 3.445356607437133789e+00 4.000000000000000000e+00 6.272512817382812500e+02 2.075000000000000000e+01 4.925000000000000000e+01
2.400000000000000000e+01 7.580230769230767010e+02 3.552339477539062500e+02 5.584625244140625000e+00 0.000000000000000000e+00 0.000000000000000000e+00 3.281506835937500000e+03 2.058982133865356445e+00 3.000000000000000000e+00 3.817245788574218750e+02 2.175000000000000000e+01 4.925000000000000000e+01
7.300000000000000000e+01 8.542615384615385210e+02 3.906702575683593750e+02 5.468475341796875000e+00 0.000000000000000000e+00 0.000000000000000000e+00 3.246847167968750000e+03 1.498950719833374023e+00 4.000000000000000000e+00 7.547000732421875000e+02 2.225000000000000000e+01 4.925000000000000000e+01
7.000000000000000000e+01 9.055384615384616609e+02 3.836323852539062500e+02 5.342803955078125000e+00 0.000000000000000000e+00 0.000000000000000000e+00 3.214232421875000000e+03 3.268942117691040039e+00 4.000000000000000000e+00 6.279069213867187500e+02 2.275000000000000000e+01 4.925000000000000000e+01
7.400000000000000000e+01 8.940153846153843915e+02 3.591415100097656250e+02 5.207580566406250000e+00 0.000000000000000000e+00 0.000000000000000000e+00 3.183662841796875000e+03 3.635495185852050781e+00 4.000000000000000000e+00 6.344213867187500000e+02 2.325000000000000000e+01 4.925000000000000000e+01
2.400000000000000000e+01 5.182692307692311715e+02 3.130240478515625000e+02 5.420410156250000000e+00 0.000000000000000000e+00 2.941176593303680420e-01 3.330740966796875000e+03 4.044423103332519531e+00 3.000000000000000000e+00 3.452595520019531250e+02 2.775000000000000000e+01 4.925000000000000000e+01
6.500000000000000000e+01 5.611307692307692605e+02 2.962718200683593750e+02 5.699035644531250000e+00 0.000000000000000000e+00 1.176470637321472168e+00 3.554435546875000000e+03 3.986711263656616211e+00 4.000000000000000000e+00 1.232206878662109375e+02 3.175000000000000000e+01 4.925000000000000000e+01
1.300000000000000000e+01 5.458769230769231626e+02 2.936072387695312500e+02 5.514678955078125000e+00 0.000000000000000000e+00 3.352941274642944336e+00 3.547904541015625000e+03 4.047414302825927734e+00 3.000000000000000000e+00 9.012515258789062500e+01 3.425000000000000000e+01 4.925000000000000000e+01
3.000000000000000000e+00 5.446923076923073950e+02 2.810176086425781250e+02 6.233520507812500000e+00 0.000000000000000000e+00 2.470588207244873047e+00 3.666014160156250000e+03 4.037963390350341797e+00 1.000000000000000000e+00 1.831474304199218750e+02 3.925000000000000000e+01 4.925000000000000000e+01
2.000000000000000000e+00 4.977076923076922981e+02 2.744222412109375000e+02 5.954650878906250000e+00 0.000000000000000000e+00 3.000000000000000000e+00 3.678733398437500000e+03 4.057915210723876953e+00 1.000000000000000000e+00 1.416449127197265625e+02 4.125000000000000000e+01 4.925000000000000000e+01
6.000000000000000000e+00 4.389230769230770761e+02 2.581709289550781250e+02 5.767333984375000000e+00 0.000000000000000000e+00 2.352941274642944336e+00 3.717305419921875000e+03 4.072077274322509766e+00 1.000000000000000000e+00 1.370289611816406250e+02 4.275000000000000000e+01 4.925000000000000000e+01
1.000000000000000000e+00 4.021846153846151424e+02 2.201351318359375000e+02 5.846923828125000000e+00 0.000000000000000000e+00 1.941176414489746094e+00 3.804076416015625000e+03 4.108134269714355469e+00 1.000000000000000000e+00 7.707634735107421875e+01 4.425000000000000000e+01 4.925000000000000000e+01
1.000000000000000000e+00 3.866769230769230035e+02 2.142178649902343750e+02 5.903106689453125000e+00 0.000000000000000000e+00 2.470588207244873047e+00 3.838355712890625000e+03 4.122753620147705078e+00 1.000000000000000000e+00 1.231358871459960938e+02 4.475000000000000000e+01 4.925000000000000000e+01
3.000000000000000000e+00 3.549461538461536634e+02 2.103203735351562500e+02 5.977508544921875000e+00 0.000000000000000000e+00 1.882352948188781738e+00 3.870012939453125000e+03 4.154279708862304688e+00 1.000000000000000000e+00 2.668140029907226562e+01 4.525000000000000000e+01 4.925000000000000000e+01
0.000000000000000000e+00 3.291846153846154834e+02 2.031742401123046875e+02 6.070129394531250000e+00 0.000000000000000000e+00 2.352941274642944336e+00 3.899048339843750000e+03 4.164584636688232422e+00 1.000000000000000000e+00 2.432737350463867188e+01 4.575000000000000000e+01 4.925000000000000000e+01
1.000000000000000000e+00 3.122538461538463821e+02 1.909232788085937500e+02 6.162750244140625000e+00 0.000000000000000000e+00 2.470588207244873047e+00 3.928083740234375000e+03 4.165597915649414062e+00 1.000000000000000000e+00 2.216064643859863281e+01 4.625000000000000000e+01 4.925000000000000000e+01
1.000000000000000000e+00 2.917384615384614790e+02 1.771278686523437500e+02 6.255401611328125000e+00 0.000000000000000000e+00 1.411764740943908691e+00 3.957119140625000000e+03 4.165665626525878906e+00 1.000000000000000000e+00 2.634858703613281250e+01 4.675000000000000000e+01 4.925000000000000000e+01
1.000000000000000000e+00 2.895076923076922526e+02 1.650132751464843750e+02 6.299957275390625000e+00 0.000000000000000000e+00 1.705882310867309570e+00 3.971083496093750000e+03 4.165420532226562500e+00 1.000000000000000000e+00 3.400006103515625000e+01 4.725000000000000000e+01 4.925000000000000000e+01
1.000000000000000000e+00 2.971461538461538794e+02 1.551855926513671875e+02 6.328491210937500000e+00 0.000000000000000000e+00 1.764705896377563477e+00 3.980024414062500000e+03 4.158843040466308594e+00 1.000000000000000000e+00 1.225567913055419922e+01 4.775000000000000000e+01 4.925000000000000000e+01
0.000000000000000000e+00 2.901769230769231172e+02 1.329106292724609375e+02 6.296722412109375000e+00 0.000000000000000000e+00 1.294117689132690430e+00 3.983954833984375000e+03 4.163358211517333984e+00 1.000000000000000000e+00 1.651553869247436523e+00 4.925000000000000000e+01 4.925000000000000000e+01
1.000000000000000000e+00 2.799769230769230717e+02 1.557346343994140625e+02 4.350280761718750000e+00 0.000000000000000000e+00 2.235294103622436523e+00 3.638399658203125000e+03 3.989085674285888672e+00 1.000000000000000000e+00 2.232295989990234375e+02 5.625000000000000000e+01 4.925000000000000000e+01
1.000000000000000000e+00 2.864692307692308759e+02 1.593282928466796875e+02 4.194976806640625000e+00 0.000000000000000000e+00 2.235294103622436523e+00 3.607781250000000000e+03 3.946991682052612305e+00 1.000000000000000000e+00 2.377756500244140625e+02 5.675000000000000000e+01 4.925000000000000000e+01
1.000000000000000000e+00 2.871692307692307509e+02 1.594512329101562500e+02 4.039642333984375000e+00 0.000000000000000000e+00 2.647058725357055664e+00 3.577163085937500000e+03 3.920295238494873047e+00 1.000000000000000000e+00 2.918842163085937500e+02 5.725000000000000000e+01 4.925000000000000000e+01
1.000000000000000000e+00 2.749769230769231854e+02 1.470741424560546875e+02 3.741882324218750000e+00 0.000000000000000000e+00 2.235294103622436523e+00 3.521591064453125000e+03 3.865571022033691406e+00 1.000000000000000000e+00 3.583321228027343750e+02 5.825000000000000000e+01 4.925000000000000000e+01
1.000000000000000000e+00 2.655461538461537998e+02 1.414767456054687500e+02 3.638031005859375000e+00 0.000000000000000000e+00 1.764705896377563477e+00 3.513630126953125000e+03 3.843204021453857422e+00 1.000000000000000000e+00 4.154302062988281250e+02 5.875000000000000000e+01 4.925000000000000000e+01
0.000000000000000000e+00 2.466307692307691468e+02 1.386004028320312500e+02 3.534179687500000000e+00 0.000000000000000000e+00 1.588235259056091309e+00 3.505669189453125000e+03 3.877786874771118164e+00 1.000000000000000000e+00 3.336585998535156250e+02 5.925000000000000000e+01 4.925000000000000000e+01
0.000000000000000000e+00 2.296769230769230319e+02 1.336327056884765625e+02 3.430328369140625000e+00 0.000000000000000000e+00 1.352941155433654785e+00 3.497708251953125000e+03 3.920557498931884766e+00 1.000000000000000000e+00 2.672562561035156250e+02 5.975000000000000000e+01 4.925000000000000000e+01
0.000000000000000000e+00 2.191769230769229182e+02 1.249772949218750000e+02 3.388549804687500000e+00 0.000000000000000000e+00 1.176470637321472168e+00 3.500921630859375000e+03 3.945469141006469727e+00 1.000000000000000000e+00 2.148395690917968750e+02 6.025000000000000000e+01 4.925000000000000000e+01
0.000000000000000000e+00 2.161153846153846416e+02 1.173346862792968750e+02 3.408843994140625000e+00 0.000000000000000000e+00 1.176470637321472168e+00 3.515309082031250000e+03 3.960057735443115234e+00 1.000000000000000000e+00 2.184973297119140625e+02 6.075000000000000000e+01 4.925000000000000000e+01
0.000000000000000000e+00 2.047153846153844654e+02 1.107212753295898438e+02 3.429138183593750000e+00 0.000000000000000000e+00 1.000000000000000000e+00 3.529696533203125000e+03 3.982766151428222656e+00 1.000000000000000000e+00 1.840176086425781250e+02 6.125000000000000000e+01 4.925000000000000000e+01
0.000000000000000000e+00 1.933384615384616154e+02 1.055767974853515625e+02 3.449432373046875000e+00 0.000000000000000000e+00 1.176470637321472168e+00 3.544083984375000000e+03 4.017552375793457031e+00 1.000000000000000000e+00 1.856007995605468750e+02 6.175000000000000000e+01 4.925000000000000000e+01
1.000000000000000000e+00 1.881307692307690900e+02 1.026224594116210938e+02 3.536346435546875000e+00 0.000000000000000000e+00 1.117647051811218262e+00 3.561162353515625000e+03 4.056156158447265625e+00 1.000000000000000000e+00 9.776191711425781250e+01 6.225000000000000000e+01 4.925000000000000000e+01
0.000000000000000000e+00 1.811615384615384130e+02 9.942314910888671875e+01 3.645446777343750000e+00 0.000000000000000000e+00 2.352941274642944336e+00 3.579137451171875000e+03 4.064520835876464844e+00 1.000000000000000000e+00 7.989540863037109375e+01 6.275000000000000000e+01 4.925000000000000000e+01
0.000000000000000000e+00 1.763230769230768828e+02 9.187236785888671875e+01 3.912322998046875000e+00 0.000000000000000000e+00 1.294117689132690430e+00 3.607015625000000000e+03 4.040028095245361328e+00 1.000000000000000000e+00 1.376306762695312500e+02 6.425000000000000000e+01 4.925000000000000000e+01
0.000000000000000000e+00 1.756769230769230603e+02 9.109840393066406250e+01 3.960968017578125000e+00 0.000000000000000000e+00 1.411764740943908691e+00 3.598943115234375000e+03 4.002537250518798828e+00 1.000000000000000000e+00 1.650184326171875000e+02 6.475000000000000000e+01 4.925000000000000000e+01
0.000000000000000000e+00 1.949692307692308191e+02 1.105515670776367188e+02 3.884887695312500000e+00 0.000000000000000000e+00 1.647058844566345215e+00 3.527355957031250000e+03 3.853516340255737305e+00 1.000000000000000000e+00 2.939177551269531250e+02 6.625000000000000000e+01 4.925000000000000000e+01
0.000000000000000000e+00 2.215153846153848747e+02 1.179133682250976562e+02 3.447143554687500000e+00 0.000000000000000000e+00 2.176470518112182617e+00 3.385049560546875000e+03 3.663978338241577148e+00 1.000000000000000000e+00 6.114706420898437500e+02 6.775000000000000000e+01 4.925000000000000000e+01
0.000000000000000000e+00 2.274076923076923151e+02 9.983970642089843750e+01 2.986022949218750000e+00 0.000000000000000000e+00 8.235294222831726074e-01 3.275509521484375000e+03 3.718974828720092773e+00 1.000000000000000000e+00 4.789594116210937500e+02 6.875000000000000000e+01 4.925000000000000000e+01
0.000000000000000000e+00 2.320384615384614904e+02 1.001038436889648438e+02 2.755462646484375000e+00 0.000000000000000000e+00 7.647058963775634766e-01 3.220739257812500000e+03 3.746683597564697266e+00 1.000000000000000000e+00 4.094630737304687500e+02 6.925000000000000000e+01 4.925000000000000000e+01
0.000000000000000000e+00 2.399538461538460865e+02 1.054431152343750000e+02 2.503570556640625000e+00 0.000000000000000000e+00 8.235294222831726074e-01 3.175883300781250000e+03 3.739520788192749023e+00 1.000000000000000000e+00 4.431757202148437500e+02 6.975000000000000000e+01 4.925000000000000000e+01
1.000000000000000000e+00 2.470615384615383050e+02 1.193466796875000000e+02 2.244537353515625000e+00 0.000000000000000000e+00 1.117647051811218262e+00 3.134332275390625000e+03 3.714126348495483398e+00 1.000000000000000000e+00 5.193782958984375000e+02 7.025000000000000000e+01 4.925000000000000000e+01
0.000000000000000000e+00 2.575076923076921389e+02 1.415111999511718750e+02 1.985534667968750000e+00 0.000000000000000000e+00 1.470588207244873047e+00 3.092781005859375000e+03 3.679187536239624023e+00 1.000000000000000000e+00 4.586666259765625000e+02 7.075000000000000000e+01 4.925000000000000000e+01
0.000000000000000000e+00 2.758076923076924345e+02 1.801805267333984375e+02 1.519714355468750000e+00 0.000000000000000000e+00 1.588235259056091309e+00 3.033113281250000000e+03 3.714644670486450195e+00 1.000000000000000000e+00 5.240437622070312500e+02 7.175000000000000000e+01 4.925000000000000000e+01
0.000000000000000000e+00 2.863692307692306258e+02 1.891654663085937500e+02 1.312927246093750000e+00 0.000000000000000000e+00 2.647058725357055664e+00 3.014996826171875000e+03 3.711699008941650391e+00 1.000000000000000000e+00 5.432687377929687500e+02 7.225000000000000000e+01 4.925000000000000000e+01
0.000000000000000000e+00 3.015692307692308987e+02 1.946070709228515625e+02 1.106140136718750000e+00 0.000000000000000000e+00 2.117647171020507812e+00 2.996880371093750000e+03 3.660485744476318359e+00 1.000000000000000000e+00 5.845716552734375000e+02 7.275000000000000000e+01 4.925000000000000000e+01
1.000000000000000000e+00 3.165923076923078270e+02 1.960749359130859375e+02 9.130249023437500000e-01 0.000000000000000000e+00 2.000000000000000000e+00 2.981759765625000000e+03 3.550270080566406250e+00 1.000000000000000000e+00 6.418065185546875000e+02 7.325000000000000000e+01 4.925000000000000000e+01
0.000000000000000000e+00 2.948076923076924345e+02 1.804351043701171875e+02 6.088562011718750000e-01 0.000000000000000000e+00 2.117647171020507812e+00 2.969495117187500000e+03 3.447814226150512695e+00 1.000000000000000000e+00 7.738387451171875000e+02 7.425000000000000000e+01 4.925000000000000000e+01
1.000000000000000000e+00 2.715769230769232081e+02 1.505704650878906250e+02 2.334594726562500000e-01 0.000000000000000000e+00 1.470588207244873047e+00 2.958180664062500000e+03 3.510740280151367188e+00 1.000000000000000000e+00 8.750274658203125000e+02 7.575000000000000000e+01 4.925000000000000000e+01
1.000000000000000000e+00 2.743538461538462911e+02 1.161831130981445312e+02 3.704833984375000000e-02 0.000000000000000000e+00 1.705882310867309570e+00 2.955359375000000000e+03 3.481276988983154297e+00 1.000000000000000000e+00 8.823798828125000000e+02 7.675000000000000000e+01 4.925000000000000000e+01
2.000000000000000000e+00 2.817615384615382936e+02 1.046626815795898438e+02 -1.312255859375000000e-03 0.000000000000000000e+00 9.411764740943908691e-01 2.951685791015625000e+03 3.468225717544555664e+00 1.000000000000000000e+00 9.870352172851562500e+02 7.725000000000000000e+01 4.925000000000000000e+01
4.000000000000000000e+00 2.850230769230767010e+02 1.026297073364257812e+02 -1.974487304687500000e-02 0.000000000000000000e+00 0.000000000000000000e+00 2.947257812500000000e+03 3.473761320114135742e+00 1.000000000000000000e+00 7.842955932617187500e+02 7.775000000000000000e+01 4.925000000000000000e+01
2.000000000000000000e+00 2.984307692307693287e+02 1.086599884033203125e+02 -3.820800781250000000e-02 0.000000000000000000e+00 1.117647051811218262e+00 2.942829833984375000e+03 3.484783649444580078e+00 1.000000000000000000e+00 6.423187255859375000e+02 7.825000000000000000e+01 4.925000000000000000e+01
1.000000000000000000e+00 3.045153846153846189e+02 1.193134231567382812e+02 -5.664062500000000000e-02 0.000000000000000000e+00 2.941176593303680420e-01 2.938401855468750000e+03 3.522436618804931641e+00 1.000000000000000000e+00 5.537333374023437500e+02 7.875000000000000000e+01 4.925000000000000000e+01
0.000000000000000000e+00 3.100769230769231513e+02 1.288880462646484375e+02 1.029357910156250000e-01 0.000000000000000000e+00 8.823529481887817383e-01 2.915362304687500000e+03 3.620298862457275391e+00 1.000000000000000000e+00 5.608654785156250000e+02 7.925000000000000000e+01 4.925000000000000000e+01
1.000000000000000000e+00 3.259923076923077474e+02 1.356126251220703125e+02 2.624816894531250000e-01 0.000000000000000000e+00 5.882353186607360840e-01 2.892322998046875000e+03 3.651634931564331055e+00 1.000000000000000000e+00 5.046030883789062500e+02 7.975000000000000000e+01 4.925000000000000000e+01
1.000000000000000000e+00 3.568384615384613880e+02 1.419537658691406250e+02 4.220581054687500000e-01 0.000000000000000000e+00 7.647058963775634766e-01 2.869283447265625000e+03 3.646159410476684570e+00 1.000000000000000000e+00 4.939440612792968750e+02 8.025000000000000000e+01 4.925000000000000000e+01
1.000000000000000000e+00 3.565923076923075996e+02 1.493540191650390625e+02 5.303344726562500000e-01 0.000000000000000000e+00 9.411764740943908691e-01 2.832557617187500000e+03 3.652907133102416992e+00 1.000000000000000000e+00 5.358297729492187500e+02 8.075000000000000000e+01 4.925000000000000000e+01
5.000000000000000000e+00 3.452923076923076451e+02 1.661749267578125000e+02 4.391479492187500000e-01 0.000000000000000000e+00 2.117647171020507812e+00 2.676987548828125000e+03 3.638067007064819336e+00 1.000000000000000000e+00 4.790428771972656250e+02 8.175000000000000000e+01 4.925000000000000000e+01
3.800000000000000000e+01 3.927692307692310578e+02 1.954816436767578125e+02 -5.639953613281250000e-01 0.000000000000000000e+00 5.882353186607360840e-01 2.317190429687500000e+03 1.562270760536193848e+00 3.000000000000000000e+00 1.112343505859375000e+03 8.325000000000000000e+01 4.925000000000000000e+01
5.400000000000000000e+01 4.390692307692308987e+02 2.041643981933593750e+02 -3.997802734375000000e+00 0.000000000000000000e+00 5.294117927551269531e-01 1.675942504882812500e+03 3.058002233505249023e+00 4.000000000000000000e+00 1.115453979492187500e+03 8.525000000000000000e+01 4.925000000000000000e+01
6.000000000000000000e+00 4.517769230769230830e+02 2.066812896728515625e+02 -5.158752441406250000e+00 1.432846337556838989e-01 0.000000000000000000e+00 1.517903564453125000e+03 2.730909109115600586e+00 1.000000000000000000e+00 1.335036621093750000e+03 8.575000000000000000e+01 4.925000000000000000e+01
6.100000000000000000e+01 4.499461538461537771e+02 2.007993927001953125e+02 -6.319732666015625000e+00 1.661518067121505737e-01 0.000000000000000000e+00 1.359864501953125000e+03 2.193010330200195312e+00 4.000000000000000000e+00 1.322390502929687500e+03 8.625000000000000000e+01 4.925000000000000000e+01
1.000000000000000000e+00 2.423615384615384585e+02 5.697717666625976562e+01 -3.921020507812500000e+00 3.238138258457183838e-01 0.000000000000000000e+00 1.640805786132812500e+03 2.688600063323974609e+00 1.000000000000000000e+00 1.682272583007812500e+03 9.575000000000000000e+01 4.925000000000000000e+01
2.000000000000000000e+00 2.500923076923077417e+02 5.804423522949218750e+01 -4.642517089843750000e+00 6.183676123619079590e-01 0.000000000000000000e+00 1.571793945312500000e+03 2.677622556686401367e+00 1.000000000000000000e+00 1.962332763671875000e+03 9.625000000000000000e+01 4.925000000000000000e+01
2.000000000000000000e+00 2.488615384615384585e+02 6.555607604980468750e+01 -5.364013671875000000e+00 5.797777771949768066e-01 0.000000000000000000e+00 1.502782226562500000e+03 2.636868476867675781e+00 1.000000000000000000e+00 1.850897949218750000e+03 9.675000000000000000e+01 4.925000000000000000e+01
2.000000000000000000e+00 2.732230769230769170e+02 8.637392425537109375e+01 -6.694488525390625000e+00 6.441530585289001465e-01 2.352941185235977173e-01 1.386983032226562500e+03 2.462406396865844727e+00 1.000000000000000000e+00 1.959823120117187500e+03 9.775000000000000000e+01 4.925000000000000000e+01
3.000000000000000000e+00 2.730153846153847894e+02 9.065621948242187500e+01 -7.190887451171875000e+00 5.346029996871948242e-01 0.000000000000000000e+00 1.362420166015625000e+03 2.434993982315063477e+00 1.000000000000000000e+00 1.851036987304687500e+03 9.825000000000000000e+01 4.925000000000000000e+01
3.000000000000000000e+00 2.818153846153845166e+02 1.044065093994140625e+02 -8.183685302734375000e+00 6.018695831298828125e-01 2.941176593303680420e-01 1.313294433593750000e+03 2.421375274658203125e+00 1.000000000000000000e+00 1.985723632812500000e+03 9.925000000000000000e+01 4.925000000000000000e+01
3.000000000000000000e+00 2.811307692307692605e+02 1.078890304565429688e+02 -8.060821533203125000e+00 3.555902242660522461e-01 0.000000000000000000e+00 1.348451660156250000e+03 2.516131877899169922e+00 1.000000000000000000e+00 1.779869384765625000e+03 9.975000000000000000e+01 4.925000000000000000e+01
2.000000000000000000e+00 2.643846153846154152e+02 1.030242080688476562e+02 -7.731506347656250000e+00 2.457252144813537598e-01 2.941176593303680420e-01 1.403515502929687500e+03 2.697092294692993164e+00 1.000000000000000000e+00 1.589500488281250000e+03 1.002500000000000000e+02 4.925000000000000000e+01
2.000000000000000000e+00 2.539230769230770761e+02 1.046056671142578125e+02 -7.402191162109375000e+00 9.999999776482582092e-03 0.000000000000000000e+00 1.458579467773437500e+03 2.856736421585083008e+00 1.000000000000000000e+00 1.285501342773437500e+03 1.007500000000000000e+02 4.925000000000000000e+01
1.500000000000000000e+01 2.956692307692306940e+02 1.159764862060546875e+02 -7.072875976562500000e+00 2.514687180519104004e-01 0.000000000000000000e+00 1.513643432617187500e+03 2.822775125503540039e+00 3.000000000000000000e+00 1.520882446289062500e+03 1.012500000000000000e+02 4.925000000000000000e+01
1.000000000000000000e+01 3.203384615384616723e+02 1.172490005493164062e+02 -6.326416015625000000e+00 1.851518452167510986e-01 0.000000000000000000e+00 1.618001098632812500e+03 2.879668712615966797e+00 3.000000000000000000e+00 1.592967773437500000e+03 1.017500000000000000e+02 4.925000000000000000e+01
7.000000000000000000e+00 3.513692307692307963e+02 1.229956970214843750e+02 -4.833526611328125000e+00 1.014584600925445557e-01 3.529411852359771729e-01 1.826716552734375000e+03 2.414255380630493164e+00 1.000000000000000000e+00 1.285519042968750000e+03 1.027500000000000000e+02 4.925000000000000000e+01
1.000000000000000000e+01 3.814076923076921730e+02 1.232387161254882812e+02 -4.170959472656250000e+00 9.999999776482582092e-03 3.529411852359771729e-01 1.921547485351562500e+03 1.912958979606628418e+00 3.000000000000000000e+00 1.242318359375000000e+03 1.032500000000000000e+02 4.925000000000000000e+01
5.500000000000000000e+01 4.089230769230769056e+02 1.229787673950195312e+02 -3.760040283203125000e+00 3.516873717308044434e-01 1.411764740943908691e+00 1.987798095703125000e+03 1.616167902946472168e+00 4.000000000000000000e+00 1.352975830078125000e+03 1.037500000000000000e+02 4.925000000000000000e+01
1.000000000000000000e+00 3.552384615384615927e+02 1.210797653198242188e+02 -2.855834960937500000e+00 9.999999776482582092e-03 5.882353186607360840e-01 2.145975585937500000e+03 3.029009819030761719e+00 1.000000000000000000e+00 8.572658081054687500e+02 1.052500000000000000e+02 4.925000000000000000e+01
8.000000000000000000e+00 3.121692307692308077e+02 1.168441848754882812e+02 -3.348022460937500000e+00 9.999999776482582092e-03 8.235294222831726074e-01 2.116178466796875000e+03 3.244781494140625000e+00 1.000000000000000000e+00 1.027899536132812500e+03 1.062500000000000000e+02 4.925000000000000000e+01
4.500000000000000000e+01 3.115615384615384187e+02 1.142522659301757812e+02 -3.594146728515625000e+00 1.470490097999572754e-01 1.117647051811218262e+00 2.101279785156250000e+03 8.326058983802795410e-01 4.000000000000000000e+00 1.267869506835937500e+03 1.067500000000000000e+02 4.925000000000000000e+01
5.200000000000000000e+01 3.129538461538462570e+02 1.051043243408203125e+02 -4.089202880859375000e+00 9.999999776482582092e-03 1.235294103622436523e+00 2.066481689453125000e+03 8.156311511993408203e-01 4.000000000000000000e+00 1.133523559570312500e+03 1.072500000000000000e+02 4.925000000000000000e+01
6.500000000000000000e+01 3.433615384615386006e+02 1.039278869628906250e+02 -4.667236328125000000e+00 2.564822137355804443e-01 5.882353186607360840e-01 2.025050537109375000e+03 1.083479523658752441e+00 4.000000000000000000e+00 1.442900024414062500e+03 1.077500000000000000e+02 4.925000000000000000e+01
5.300000000000000000e+01 3.813615384615384301e+02 1.081060562133789062e+02 -5.245269775390625000e+00 3.979063034057617188e-01 0.000000000000000000e+00 1.983619262695312500e+03 8.000632524490356445e-01 4.000000000000000000e+00 1.684014770507812500e+03 1.082500000000000000e+02 4.925000000000000000e+01
5.100000000000000000e+01 3.750692307692307850e+02 1.105478515625000000e+02 -5.823333740234375000e+00 2.651008367538452148e-01 7.647058963775634766e-01 1.942187988281250000e+03 1.403502225875854492e+00 4.000000000000000000e+00 1.326004516601562500e+03 1.087500000000000000e+02 4.925000000000000000e+01
4.800000000000000000e+01 3.782846153846153925e+02 1.092408905029296875e+02 -5.885589599609375000e+00 5.316778421401977539e-01 0.000000000000000000e+00 1.958955932617187500e+03 1.129957437515258789e+00 4.000000000000000000e+00 1.627193115234375000e+03 1.092500000000000000e+02 4.925000000000000000e+01
4.600000000000000000e+01 3.785153846153846189e+02 9.694074249267578125e+01 -5.947875976562500000e+00 4.102694988250732422e-01 7.647058963775634766e-01 1.975723876953125000e+03 2.023381471633911133e+00 4.000000000000000000e+00 1.630716308593750000e+03 1.097500000000000000e+02 4.925000000000000000e+01
2.300000000000000000e+01 3.522846153846155062e+02 9.574776458740234375e+01 -5.954071044921875000e+00 5.424582958221435547e-01 5.882353186607360840e-01 2.028486206054687500e+03 1.591354489326477051e+00 3.000000000000000000e+00 1.559393554687500000e+03 1.107500000000000000e+02 4.925000000000000000e+01
8.000000000000000000e+00 3.404769230769230148e+02 1.051364669799804688e+02 -5.543060302734375000e+00 1.587772667407989502e-01 1.117647051811218262e+00 2.122160400390625000e+03 2.666533470153808594e+00 1.000000000000000000e+00 1.012421264648437500e+03 1.112500000000000000e+02 4.925000000000000000e+01
0.000000000000000000e+00 2.383230769230769681e+02 9.973816680908203125e+01 -1.293975830078125000e+00 0.000000000000000000e+00 1.117647051811218262e+00 2.880951904296875000e+03 3.444309234619140625e+00 1.000000000000000000e+00 6.771048583984375000e+02 1.162500000000000000e+02 4.925000000000000000e+01
0.000000000000000000e+00 2.748461538461538680e+02 1.212772521972656250e+02 -2.517364501953125000e+00 9.999999776482582092e-03 0.000000000000000000e+00 2.692764404296875000e+03 3.387579441070556641e+00 1.000000000000000000e+00 6.113197021484375000e+02 1.182500000000000000e+02 4.925000000000000000e+01
1.000000000000000000e+00 2.941153846153846416e+02 1.313167572021484375e+02 -2.940216064453125000e+00 9.999999776482582092e-03 5.294117927551269531e-01 2.635962158203125000e+03 3.363072633743286133e+00 1.000000000000000000e+00 5.994970092773437500e+02 1.187500000000000000e+02 4.925000000000000000e+01
1.200000000000000000e+01 3.843000000000000682e+02 1.685466003417968750e+02 -3.919677734375000000e+00 1.344117075204849243e-01 7.058823704719543457e-01 2.500346191406250000e+03 2.311396598815917969e+00 3.000000000000000000e+00 7.007135009765625000e+02 1.207500000000000000e+02 4.925000000000000000e+01
4.800000000000000000e+01 4.030692307692307281e+02 1.792677917480468750e+02 -3.867919921875000000e+00 3.414083123207092285e-01 1.647058844566345215e+00 2.504606201171875000e+03 1.796730279922485352e+00 4.000000000000000000e+00 9.566581420898437500e+02 1.212500000000000000e+02 4.925000000000000000e+01
3.400000000000000000e+01 4.342615384615382368e+02 1.933031158447265625e+02 -3.816162109375000000e+00 2.152071148157119751e-01 8.235294222831726074e-01 2.508866210937500000e+03 1.483496308326721191e+00 3.000000000000000000e+00 9.947003784179687500e+02 1.217500000000000000e+02 4.925000000000000000e+01
5.800000000000000000e+01 4.498076923076919797e+02 1.971418151855468750e+02 -3.577056884765625000e+00 1.602327972650527954e-01 0.000000000000000000e+00 2.539614013671875000e+03 7.957019805908203125e-01 4.000000000000000000e+00 7.788536376953125000e+02 1.222500000000000000e+02 4.925000000000000000e+01
1.600000000000000000e+01 4.633923076923078384e+02 2.027102661132812500e+02 -3.275543212890625000e+00 9.999999776482582092e-03 3.529411852359771729e-01 2.579190917968750000e+03 8.093643784523010254e-01 3.000000000000000000e+00 6.552106933593750000e+02 1.227500000000000000e+02 4.925000000000000000e+01
4.400000000000000000e+01 4.609769230769232990e+02 2.041349487304687500e+02 -2.974029541015625000e+00 9.999999776482582092e-03 0.000000000000000000e+00 2.618767822265625000e+03 8.359649777412414551e-01 3.000000000000000000e+00 5.998186035156250000e+02 1.232500000000000000e+02 4.925000000000000000e+01
2.600000000000000000e+01 4.645538461538461661e+02 2.012046508789062500e+02 -2.672515869140625000e+00 9.999999776482582092e-03 5.882352963089942932e-02 2.658344726562500000e+03 8.648172020912170410e-01 3.000000000000000000e+00 3.417334899902343750e+02 1.237500000000000000e+02 4.925000000000000000e+01
3.000000000000000000e+00 4.809615384615389644e+02 1.979349060058593750e+02 -1.839080810546875000e+00 0.000000000000000000e+00 6.470588445663452148e-01 2.763392089843750000e+03 1.620515465736389160e+00 1.000000000000000000e+00 2.942428894042968750e+02 1.257500000000000000e+02 4.925000000000000000e+01
1.000000000000000000e+01 4.946692307692306940e+02 2.112280578613281250e+02 -1.796722412109375000e+00 9.999999776482582092e-03 1.000000000000000000e+00 2.757601806640625000e+03 1.134135723114013672e+00 3.000000000000000000e+00 4.720507202148437500e+02 1.262500000000000000e+02 4.925000000000000000e+01
3.600000000000000000e+01 5.149769230769229580e+02 2.253472747802734375e+02 -1.754333496093750000e+00 9.999999776482582092e-03 1.764705896377563477e+00 2.751811767578125000e+03 8.949925303459167480e-01 3.000000000000000000e+00 4.713800659179687500e+02 1.267500000000000000e+02 4.925000000000000000e+01
1.000000000000000000e+01 5.365538461538461661e+02 2.289285430908203125e+02 -1.711944580078125000e+00 9.999999776482582092e-03 8.235294222831726074e-01 2.746021484375000000e+03 8.914191126823425293e-01 3.000000000000000000e+00 3.424403686523437500e+02 1.272500000000000000e+02 4.925000000000000000e+01
6.000000000000000000e+00 5.731923076923080771e+02 2.329652099609375000e+02 -1.992340087890625000e+00 9.999999776482582092e-03 1.352941155433654785e+00 2.695855468750000000e+03 8.943428397178649902e-01 1.000000000000000000e+00 2.703424072265625000e+02 1.282500000000000000e+02 4.925000000000000000e+01
4.300000000000000000e+01 5.927307692307692832e+02 2.387274322509765625e+02 -2.193389892578125000e+00 9.999999776482582092e-03 1.411764740943908691e+00 2.664341552734375000e+03 9.011121392250061035e-01 3.000000000000000000e+00 2.229573516845703125e+02 1.287500000000000000e+02 4.925000000000000000e+01
4.800000000000000000e+01 6.022076923076924686e+02 2.498984832763671875e+02 -2.394439697265625000e+00 9.999999776482582092e-03 3.411764621734619141e+00 2.632827636718750000e+03 9.414713978767395020e-01 4.000000000000000000e+00 2.171545410156250000e+02 1.292500000000000000e+02 4.925000000000000000e+01
2.700000000000000000e+01 6.074153846153844825e+02 2.636022033691406250e+02 -2.748626708984375000e+00 0.000000000000000000e+00 1.941176414489746094e+00 2.565100341796875000e+03 1.744125127792358398e+00 3.000000000000000000e+00 1.237580871582031250e+02 1.302500000000000000e+02 4.925000000000000000e+01
5.500000000000000000e+01 6.099999999999997726e+02 2.733322143554687500e+02 -2.922302246093750000e+00 9.999999776482582092e-03 5.882353186607360840e-01 2.530901123046875000e+03 9.131515622138977051e-01 4.000000000000000000e+00 2.985357971191406250e+02 1.307500000000000000e+02 4.925000000000000000e+01
6.300000000000000000e+01 6.108461538461540385e+02 2.799660034179687500e+02 -3.095977783203125000e+00 2.023515999317169189e-01 3.529411852359771729e-01 2.496701660156250000e+03 8.802920579910278320e-01 4.000000000000000000e+00 6.374202270507812500e+02 1.312500000000000000e+02 4.925000000000000000e+01
6.100000000000000000e+01 6.184307692307691013e+02 2.852105407714843750e+02 -3.227844238281250000e+00 1.573619693517684937e-01 4.705882370471954346e-01 2.465184570312500000e+03 1.562265753746032715e+00 4.000000000000000000e+00 4.875663452148437500e+02 1.317500000000000000e+02 4.925000000000000000e+01
3.000000000000000000e+01 6.256461538461536520e+02 2.948729553222656250e+02 -3.359710693359375000e+00 5.271279811859130859e-01 0.000000000000000000e+00 2.433667480468750000e+03 1.709228157997131348e+00 3.000000000000000000e+00 7.971404418945312500e+02 1.322500000000000000e+02 4.925000000000000000e+01
5.400000000000000000e+01 6.359384615384611834e+02 3.027633056640625000e+02 -3.491577148437500000e+00 1.746552735567092896e-01 2.941176593303680420e-01 2.402150146484375000e+03 1.006915926933288574e+00 4.000000000000000000e+00 6.371375122070312500e+02 1.327500000000000000e+02 4.925000000000000000e+01
2.500000000000000000e+01 6.355384615384615472e+02 3.004682312011718750e+02 -3.608795166015625000e+00 9.999999776482582092e-03 0.000000000000000000e+00 2.369364990234375000e+03 1.524240970611572266e+00 3.000000000000000000e+00 2.150175781250000000e+02 1.332500000000000000e+02 4.925000000000000000e+01
6.300000000000000000e+01 6.441846153846153129e+02 2.897084350585937500e+02 -3.682098388671875000e+00 1.124173700809478760e-01 9.411764740943908691e-01 2.332776123046875000e+03 8.778244853019714355e-01 4.000000000000000000e+00 4.034091491699218750e+02 1.337500000000000000e+02 4.925000000000000000e+01
5.900000000000000000e+01 6.554615384615382254e+02 2.836647033691406250e+02 -3.755371093750000000e+00 9.999999776482582092e-03 5.882352963089942932e-02 2.296187255859375000e+03 8.724445700645446777e-01 4.000000000000000000e+00 2.686144714355468750e+02 1.342500000000000000e+02 4.925000000000000000e+01
3.300000000000000000e+01 6.487000000000002728e+02 2.819833374023437500e+02 -3.828674316406250000e+00 0.000000000000000000e+00 5.882353186607360840e-01 2.259598388671875000e+03 8.921936750411987305e-01 3.000000000000000000e+00 7.030323791503906250e+01 1.347500000000000000e+02 4.925000000000000000e+01
2.700000000000000000e+01 6.398307692307694197e+02 2.715152282714843750e+02 -3.810729980468750000e+00 0.000000000000000000e+00 1.294117689132690430e+00 2.230266845703125000e+03 1.632997632026672363e+00 3.000000000000000000e+00 4.761199188232421875e+01 1.352500000000000000e+02 4.925000000000000000e+01
1.900000000000000000e+01 6.387307692307693969e+02 2.569921569824218750e+02 -3.701568603515625000e+00 0.000000000000000000e+00 1.411764740943908691e+00 2.208192382812500000e+03 3.477048635482788086e+00 3.000000000000000000e+00 2.835815238952636719e+01 1.357500000000000000e+02 4.925000000000000000e+01
6.000000000000000000e+01 6.653615384615387711e+02 2.509938354492187500e+02 -3.483215332031250000e+00 0.000000000000000000e+00 1.294117689132690430e+00 2.164043701171875000e+03 8.703646063804626465e-01 4.000000000000000000e+00 5.810964965820312500e+01 1.367500000000000000e+02 4.925000000000000000e+01
5.200000000000000000e+01 6.875846153846155175e+02 2.917147827148437500e+02 -3.222106933593750000e+00 0.000000000000000000e+00 8.823529481887817383e-01 2.141147460937500000e+03 8.124027252197265625e-01 4.000000000000000000e+00 1.506114044189453125e+02 1.372500000000000000e+02 4.925000000000000000e+01
5.100000000000000000e+01 7.084769230769231854e+02 3.251808776855468750e+02 -2.910400390625000000e+00 1.055612042546272278e-01 0.000000000000000000e+00 2.117977539062500000e+03 1.514158844947814941e+00 4.000000000000000000e+00 5.211031494140625000e+02 1.377500000000000000e+02 4.925000000000000000e+01
7.300000000000000000e+01 7.109307692307694424e+02 3.218992004394531250e+02 -2.598663330078125000e+00 1.063556894659996033e-01 1.058823585510253906e+00 2.094807373046875000e+03 1.469502568244934082e+00 4.000000000000000000e+00 6.970219726562500000e+02 1.382500000000000000e+02 4.925000000000000000e+01
1.700000000000000000e+01 7.208692307692308532e+02 3.082321472167968750e+02 -2.286926269531250000e+00 2.266458272933959961e-01 2.941176593303680420e-01 2.071637207031250000e+03 1.405725002288818359e+00 3.000000000000000000e+00 1.062150878906250000e+03 1.387500000000000000e+02 4.925000000000000000e+01
5.700000000000000000e+01 7.471923076923075087e+02 3.144426574707031250e+02 -1.735229492187500000e+00 0.000000000000000000e+00 2.941176593303680420e-01 1.999458251953125000e+03 1.033061981201171875e+00 4.000000000000000000e+00 3.893604431152343750e+02 1.392500000000000000e+02 4.925000000000000000e+01
5.400000000000000000e+01 7.633615384615382027e+02 3.375817565917968750e+02 -1.183532714843750000e+00 9.999999776482582092e-03 7.058823704719543457e-01 1.927279296875000000e+03 1.518243551254272461e+00 4.000000000000000000e+00 5.222774047851562500e+02 1.397500000000000000e+02 4.925000000000000000e+01
4.200000000000000000e+01 8.227615384615387484e+02 4.160478820800781250e+02 9.312744140625000000e-01 9.999999776482582092e-03 0.000000000000000000e+00 1.943089355468750000e+03 1.211611986160278320e+00 3.000000000000000000e+00 3.200950622558593750e+02 1.427500000000000000e+02 4.925000000000000000e+01
2.000000000000000000e+01 9.644846153846153811e+02 4.239193115234375000e+02 8.763214111328125000e+00 0.000000000000000000e+00 0.000000000000000000e+00 3.950255615234375000e+03 4.041876792907714844e+00 3.000000000000000000e+00 2.201400909423828125e+02 4.250000000000000000e+00 4.975000000000000000e+01
5.800000000000000000e+01 1.230169230769230580e+03 5.175637817382812500e+02 8.187652587890625000e+00 0.000000000000000000e+00 0.000000000000000000e+00 3.788610839843750000e+03 3.884114503860473633e+00 4.000000000000000000e+00 3.535752258300781250e+02 5.250000000000000000e+00 4.975000000000000000e+01
5.400000000000000000e+01 1.113615384615384983e+03 5.050735778808593750e+02 7.897644042968750000e+00 0.000000000000000000e+00 0.000000000000000000e+00 3.706716552734375000e+03 3.897540569305419922e+00 4.000000000000000000e+00 3.616420898437500000e+02 5.750000000000000000e+00 4.975000000000000000e+01
6.300000000000000000e+01 7.913230769230768828e+02 3.967585754394531250e+02 7.007507324218750000e+00 0.000000000000000000e+00 0.000000000000000000e+00 3.451385986328125000e+03 3.936981916427612305e+00 4.000000000000000000e+00 4.400772705078125000e+02 7.250000000000000000e+00 4.975000000000000000e+01
1.800000000000000000e+01 7.075999999999999091e+02 3.510611267089843750e+02 6.743133544921875000e+00 0.000000000000000000e+00 0.000000000000000000e+00 3.374476074218750000e+03 4.033104896545410156e+00 3.000000000000000000e+00 2.783231506347656250e+02 7.750000000000000000e+00 4.975000000000000000e+01
6.600000000000000000e+01 6.617692307692307168e+02 3.631990356445312500e+02 5.447845458984375000e+00 0.000000000000000000e+00 0.000000000000000000e+00 3.010062744140625000e+03 3.692052125930786133e+00 4.000000000000000000e+00 4.611147155761718750e+02 1.175000000000000000e+01 4.975000000000000000e+01
5.500000000000000000e+01 6.545999999999997954e+02 2.990354003906250000e+02 5.374176025390625000e+00 0.000000000000000000e+00 0.000000000000000000e+00 3.047322998046875000e+03 3.706299543380737305e+00 4.000000000000000000e+00 5.035635070800781250e+02 1.375000000000000000e+01 4.975000000000000000e+01
1.400000000000000000e+01 6.105384615384612061e+02 2.735399475097656250e+02 5.381256103515625000e+00 0.000000000000000000e+00 4.705882370471954346e-01 3.076201171875000000e+03 3.728540897369384766e+00 3.000000000000000000e+00 3.948771667480468750e+02 1.425000000000000000e+01 4.975000000000000000e+01
3.000000000000000000e+00 6.611000000000002501e+02 2.943055114746093750e+02 5.413330078125000000e+00 0.000000000000000000e+00 2.352941185235977173e-01 3.137856201171875000e+03 3.736699342727661133e+00 1.000000000000000000e+00 5.207267456054687500e+02 1.525000000000000000e+01 4.975000000000000000e+01
4.800000000000000000e+01 6.831153846153846416e+02 3.523575439453125000e+02 5.456146240234375000e+00 0.000000000000000000e+00 5.882353186607360840e-01 3.174531005859375000e+03 3.720436096191406250e+00 4.000000000000000000e+00 5.484381713867187500e+02 1.575000000000000000e+01 4.975000000000000000e+01
1.800000000000000000e+01 9.957230769230767464e+02 4.386498718261718750e+02 5.765472412109375000e+00 0.000000000000000000e+00 0.000000000000000000e+00 3.341379882812500000e+03 3.588243246078491211e+00 3.000000000000000000e+00 5.566946411132812500e+02 1.925000000000000000e+01 4.975000000000000000e+01
4.100000000000000000e+01 9.671923076923077360e+02 4.367217102050781250e+02 5.713470458984375000e+00 0.000000000000000000e+00 3.529411852359771729e-01 3.328137695312500000e+03 3.571624755859375000e+00 3.000000000000000000e+00 5.857926025390625000e+02 1.975000000000000000e+01 4.975000000000000000e+01
6.900000000000000000e+01 7.896846153846151992e+02 3.859385375976562500e+02 5.601043701171875000e+00 0.000000000000000000e+00 0.000000000000000000e+00 3.297954589843750000e+03 3.691648960113525391e+00 4.000000000000000000e+00 3.332998962402343750e+02 2.075000000000000000e+01 4.975000000000000000e+01
5.900000000000000000e+01 7.214307692307695561e+02 3.603518066406250000e+02 5.429382324218750000e+00 0.000000000000000000e+00 0.000000000000000000e+00 3.241880859375000000e+03 3.821537733078002930e+00 4.000000000000000000e+00 3.403428039550781250e+02 2.175000000000000000e+01 4.975000000000000000e+01
2.100000000000000000e+01 7.473461538461542659e+02 3.614893188476562500e+02 5.343566894531250000e+00 0.000000000000000000e+00 0.000000000000000000e+00 3.213843750000000000e+03 3.808926105499267578e+00 3.000000000000000000e+00 3.238646240234375000e+02 2.225000000000000000e+01 4.975000000000000000e+01
2.700000000000000000e+01 7.417846153846155630e+02 3.062248840332031250e+02 5.167938232421875000e+00 0.000000000000000000e+00 5.294117927551269531e-01 3.168803710937500000e+03 3.842014312744140625e+00 3.000000000000000000e+00 2.552940521240234375e+02 2.325000000000000000e+01 4.975000000000000000e+01
2.200000000000000000e+01 7.387923076923076451e+02 3.490612487792968750e+02 4.997955322265625000e+00 0.000000000000000000e+00 1.705882310867309570e+00 3.135239257812500000e+03 3.782637596130371094e+00 3.000000000000000000e+00 3.723666687011718750e+02 2.475000000000000000e+01 4.975000000000000000e+01
1.300000000000000000e+01 6.029153846153848235e+02 3.023012390136718750e+02 5.821105957031250000e+00 0.000000000000000000e+00 2.823529481887817383e+00 3.461412597656250000e+03 3.910223722457885742e+00 3.000000000000000000e+00 1.865342254638671875e+02 2.975000000000000000e+01 4.975000000000000000e+01
2.000000000000000000e+00 5.633692307692308532e+02 3.183871765136718750e+02 5.337768554687500000e+00 0.000000000000000000e+00 3.588235378265380859e+00 3.448930175781250000e+03 4.005525112152099609e+00 1.000000000000000000e+00 8.133351898193359375e+01 3.275000000000000000e+01 4.975000000000000000e+01
4.000000000000000000e+00 5.445307692307695788e+02 2.936198120117187500e+02 5.693054199218750000e+00 0.000000000000000000e+00 2.823529481887817383e+00 3.531526611328125000e+03 3.971172094345092773e+00 1.000000000000000000e+00 1.560533142089843750e+02 3.875000000000000000e+01 4.975000000000000000e+01
1.100000000000000000e+01 5.118384615384615586e+02 2.930410461425781250e+02 5.546356201171875000e+00 0.000000000000000000e+00 2.470588207244873047e+00 3.555606689453125000e+03 4.003143787384033203e+00 3.000000000000000000e+00 1.318090515136718750e+02 4.075000000000000000e+01 4.975000000000000000e+01
2.000000000000000000e+00 4.360923076923078838e+02 2.688053283691406250e+02 5.282135009765625000e+00 0.000000000000000000e+00 1.235294103622436523e+00 3.596322509765625000e+03 4.032239913940429688e+00 1.000000000000000000e+00 5.930005264282226562e+01 4.275000000000000000e+01 4.975000000000000000e+01
1.000000000000000000e+00 4.237000000000000455e+02 2.635475769042968750e+02 5.244049072265625000e+00 0.000000000000000000e+00 2.000000000000000000e+00 3.613328613281250000e+03 4.044986248016357422e+00 1.000000000000000000e+00 9.595895385742187500e+01 4.325000000000000000e+01 4.975000000000000000e+01
1.000000000000000000e+00 4.070923076923078838e+02 2.401396942138671875e+02 5.330932617187500000e+00 0.000000000000000000e+00 2.647058725357055664e+00 3.676150390625000000e+03 4.032034873962402344e+00 1.000000000000000000e+00 1.072745742797851562e+02 4.425000000000000000e+01 4.975000000000000000e+01
1.000000000000000000e+00 3.889999999999999432e+02 2.303858489990234375e+02 5.374389648437500000e+00 0.000000000000000000e+00 2.411764621734619141e+00 3.707561279296875000e+03 4.050399303436279297e+00 1.000000000000000000e+00 1.323699798583984375e+02 4.475000000000000000e+01 4.975000000000000000e+01
1.000000000000000000e+00 3.496461538461538225e+02 2.250284729003906250e+02 5.540466308593750000e+00 0.000000000000000000e+00 2.882352828979492188e+00 3.770572265625000000e+03 4.115929126739501953e+00 1.000000000000000000e+00 2.549350166320800781e+01 4.575000000000000000e+01 4.975000000000000000e+01
1.000000000000000000e+00 3.317692307692307736e+02 2.187689361572265625e+02 5.636718750000000000e+00 0.000000000000000000e+00 2.823529481887817383e+00 3.802109130859375000e+03 4.126688003540039062e+00 1.000000000000000000e+00 2.600343322753906250e+01 4.625000000000000000e+01 4.975000000000000000e+01
4.000000000000000000e+00 3.117692307692308304e+02 2.054507751464843750e+02 5.732940673828125000e+00 0.000000000000000000e+00 1.588235259056091309e+00 3.833645996093750000e+03 4.129796981811523438e+00 1.000000000000000000e+00 2.565669059753417969e+01 4.675000000000000000e+01 4.975000000000000000e+01
1.000000000000000000e+00 3.044769230769230717e+02 1.852339782714843750e+02 5.782531738281250000e+00 0.000000000000000000e+00 1.882352948188781738e+00 3.851713134765625000e+03 4.130486011505126953e+00 1.000000000000000000e+00 3.831040954589843750e+01 4.725000000000000000e+01 4.975000000000000000e+01
4.000000000000000000e+00 3.011923076923076792e+02 1.708303375244140625e+02 5.816558837890625000e+00 0.000000000000000000e+00 1.588235259056091309e+00 3.865290283203125000e+03 4.126236915588378906e+00 1.000000000000000000e+00 1.452925586700439453e+01 4.775000000000000000e+01 4.975000000000000000e+01
1.000000000000000000e+00 3.152230769230769738e+02 1.643738861083984375e+02 5.850616455078125000e+00 0.000000000000000000e+00 1.411764740943908691e+00 3.878867187500000000e+03 4.119213104248046875e+00 1.000000000000000000e+00 2.450005722045898438e+01 4.825000000000000000e+01 4.975000000000000000e+01
1.000000000000000000e+00 3.146615384615385551e+02 1.592154693603515625e+02 5.884643554687500000e+00 0.000000000000000000e+00 1.529411792755126953e+00 3.892444335937500000e+03 4.120359897613525391e+00 1.000000000000000000e+00 1.332675170898437500e+01 4.875000000000000000e+01 4.975000000000000000e+01
1.000000000000000000e+00 3.094153846153847098e+02 1.501850585937500000e+02 5.801849365234375000e+00 0.000000000000000000e+00 1.411764740943908691e+00 3.880693847656250000e+03 4.132339477539062500e+00 1.000000000000000000e+00 9.496625900268554688e+00 4.925000000000000000e+01 4.975000000000000000e+01
1.000000000000000000e+00 3.083692307692306258e+02 1.428898162841796875e+02 5.719085693359375000e+00 0.000000000000000000e+00 1.588235259056091309e+00 3.868943359375000000e+03 4.133238792419433594e+00 1.000000000000000000e+00 2.470355033874511719e+00 4.975000000000000000e+01 4.975000000000000000e+01
1.000000000000000000e+00 2.862692307692308873e+02 1.352708740234375000e+02 5.636291503906250000e+00 0.000000000000000000e+00 2.352941274642944336e+00 3.857192871093750000e+03 4.134710788726806641e+00 1.000000000000000000e+00 2.676680326461791992e+00 5.025000000000000000e+01 4.975000000000000000e+01
1.000000000000000000e+00 2.702923076923077588e+02 1.264018249511718750e+02 5.535034179687500000e+00 0.000000000000000000e+00 2.529411792755126953e+00 3.841519775390625000e+03 4.136656284332275391e+00 1.000000000000000000e+00 4.826661586761474609e+00 5.075000000000000000e+01 4.975000000000000000e+01
1.000000000000000000e+00 2.436615384615383846e+02 1.198846817016601562e+02 5.221557617187500000e+00 0.000000000000000000e+00 1.705882310867309570e+00 3.786637451171875000e+03 4.141186237335205078e+00 1.000000000000000000e+00 3.666807889938354492e+00 5.175000000000000000e+01 4.975000000000000000e+01
0.000000000000000000e+00 2.548846153846153584e+02 1.290900878906250000e+02 4.773315429687500000e+00 0.000000000000000000e+00 1.941176414489746094e+00 3.704212646484375000e+03 4.101637840270996094e+00 1.000000000000000000e+00 3.881040954589843750e+01 5.325000000000000000e+01 4.975000000000000000e+01
0.000000000000000000e+00 2.654000000000002615e+02 1.355411376953125000e+02 4.631225585937500000e+00 0.000000000000000000e+00 2.352941274642944336e+00 3.676703857421875000e+03 4.077975273132324219e+00 1.000000000000000000e+00 6.769630432128906250e+01 5.375000000000000000e+01 4.975000000000000000e+01
1.000000000000000000e+00 2.761846153846153697e+02 1.408921356201171875e+02 4.489135742187500000e+00 0.000000000000000000e+00 2.176470518112182617e+00 3.649195068359375000e+03 4.040065288543701172e+00 1.000000000000000000e+00 1.311034088134765625e+02 5.425000000000000000e+01 4.975000000000000000e+01
0.000000000000000000e+00 2.826076923076922753e+02 1.450785217285156250e+02 4.343933105468750000e+00 0.000000000000000000e+00 1.823529362678527832e+00 3.616027099609375000e+03 4.008577346801757812e+00 1.000000000000000000e+00 1.341919097900390625e+02 5.475000000000000000e+01 4.975000000000000000e+01
1.000000000000000000e+00 2.853846153846154152e+02 1.502772979736328125e+02 4.197662353515625000e+00 0.000000000000000000e+00 2.352941274642944336e+00 3.580972412109375000e+03 3.973327875137329102e+00 1.000000000000000000e+00 1.767513732910156250e+02 5.525000000000000000e+01 4.975000000000000000e+01
0.000000000000000000e+00 2.984615384615385096e+02 1.579654541015625000e+02 4.051422119140625000e+00 0.000000000000000000e+00 2.529411792755126953e+00 3.545917724609375000e+03 3.943726539611816406e+00 1.000000000000000000e+00 2.318441162109375000e+02 5.575000000000000000e+01 4.975000000000000000e+01
1.000000000000000000e+00 3.037692307692307168e+02 1.668219146728515625e+02 3.905151367187500000e+00 0.000000000000000000e+00 1.882352948188781738e+00 3.510863281250000000e+03 3.919513225555419922e+00 1.000000000000000000e+00 2.447829895019531250e+02 5.625000000000000000e+01 4.975000000000000000e+01
0.000000000000000000e+00 3.081076923076923322e+02 1.729514312744140625e+02 3.746673583984375000e+00 0.000000000000000000e+00 2.941176414489746094e+00 3.479128173828125000e+03 3.874866485595703125e+00 1.000000000000000000e+00 3.244494628906250000e+02 5.675000000000000000e+01 4.975000000000000000e+01
1.000000000000000000e+00 3.073461538461538680e+02 1.753972320556640625e+02 3.588195800781250000e+00 0.000000000000000000e+00 2.529411792755126953e+00 3.447393310546875000e+03 3.850129365921020508e+00 1.000000000000000000e+00 2.977156066894531250e+02 5.725000000000000000e+01 4.975000000000000000e+01
1.000000000000000000e+00 2.983846153846152447e+02 1.740028991699218750e+02 3.429748535156250000e+00 0.000000000000000000e+00 2.235294103622436523e+00 3.415658203125000000e+03 3.827451229095458984e+00 1.000000000000000000e+00 3.351169738769531250e+02 5.775000000000000000e+01 4.975000000000000000e+01
0.000000000000000000e+00 2.939153846153846530e+02 1.686581878662109375e+02 3.288330078125000000e+00 0.000000000000000000e+00 1.705882310867309570e+00 3.391241210937500000e+03 3.804357528686523438e+00 1.000000000000000000e+00 3.445371704101562500e+02 5.825000000000000000e+01 4.975000000000000000e+01
0.000000000000000000e+00 2.743461538461538680e+02 1.618693695068359375e+02 3.198089599609375000e+00 0.000000000000000000e+00 2.235294103622436523e+00 3.388778076171875000e+03 3.812716007232666016e+00 1.000000000000000000e+00 3.129710998535156250e+02 5.875000000000000000e+01 4.975000000000000000e+01
0.000000000000000000e+00 2.648384615384615017e+02 1.544496612548828125e+02 3.107849121093750000e+00 0.000000000000000000e+00 1.823529362678527832e+00 3.386314941406250000e+03 3.824795484542846680e+00 1.000000000000000000e+00 3.549871826171875000e+02 5.925000000000000000e+01 4.975000000000000000e+01
0.000000000000000000e+00 2.546999999999999318e+02 1.439632415771484375e+02 3.017608642578125000e+00 0.000000000000000000e+00 1.352941155433654785e+00 3.383851562500000000e+03 3.858764410018920898e+00 1.000000000000000000e+00 2.779824829101562500e+02 5.975000000000000000e+01 4.975000000000000000e+01
0.000000000000000000e+00 2.408384615384616154e+02 1.310256652832031250e+02 2.986999511718750000e+00 0.000000000000000000e+00 2.117647171020507812e+00 3.391418212890625000e+03 3.890551567077636719e+00 1.000000000000000000e+00 2.416965789794921875e+02 6.025000000000000000e+01 4.975000000000000000e+01
0.000000000000000000e+00 2.317692307692306883e+02 1.219882278442382812e+02 3.015991210937500000e+00 0.000000000000000000e+00 1.764705896377563477e+00 3.409014892578125000e+03 3.900943994522094727e+00 1.000000000000000000e+00 2.422666931152343750e+02 6.075000000000000000e+01 4.975000000000000000e+01
1.000000000000000000e+00 2.154846153846154664e+02 1.129746246337890625e+02 3.044982910156250000e+00 0.000000000000000000e+00 1.529411792755126953e+00 3.426611572265625000e+03 3.917584419250488281e+00 1.000000000000000000e+00 2.300036621093750000e+02 6.125000000000000000e+01 4.975000000000000000e+01
1.000000000000000000e+00 2.060692307692308134e+02 1.076214370727539062e+02 3.074005126953125000e+00 0.000000000000000000e+00 1.470588207244873047e+00 3.444208007812500000e+03 3.951373577117919922e+00 1.000000000000000000e+00 1.830289001464843750e+02 6.175000000000000000e+01 4.975000000000000000e+01
1.000000000000000000e+00 1.938846153846154152e+02 1.057964935302734375e+02 3.283294677734375000e+00 0.000000000000000000e+00 1.529411792755126953e+00 3.483095458984375000e+03 4.013819694519042969e+00 1.000000000000000000e+00 1.229542465209960938e+02 6.275000000000000000e+01 4.975000000000000000e+01
0.000000000000000000e+00 1.900692307692306997e+02 9.961584472656250000e+01 3.398742675781250000e+00 0.000000000000000000e+00 1.882352948188781738e+00 3.502802978515625000e+03 4.022480964660644531e+00 1.000000000000000000e+00 1.365247650146484375e+02 6.325000000000000000e+01 4.975000000000000000e+01
1.000000000000000000e+00 1.887461538461538453e+02 9.295625305175781250e+01 3.590026855468750000e+00 0.000000000000000000e+00 2.235294103622436523e+00 3.520903808593750000e+03 4.004697322845458984e+00 1.000000000000000000e+00 1.104534988403320312e+02 6.425000000000000000e+01 4.975000000000000000e+01
1.000000000000000000e+00 2.009615384615383959e+02 1.005389938354492188e+02 3.775451660156250000e+00 0.000000000000000000e+00 1.941176414489746094e+00 3.506979492187500000e+03 3.885637760162353516e+00 1.000000000000000000e+00 2.343441925048828125e+02 6.575000000000000000e+01 4.975000000000000000e+01
1.000000000000000000e+00 2.084307692307691866e+02 1.140617218017578125e+02 3.683227539062500000e+00 0.000000000000000000e+00 1.764705896377563477e+00 3.468957275390625000e+03 3.804987192153930664e+00 1.000000000000000000e+00 2.276465148925781250e+02 6.625000000000000000e+01 4.975000000000000000e+01
1.000000000000000000e+00 2.133461538461540101e+02 1.283872680664062500e+02 3.591003417968750000e+00 0.000000000000000000e+00 1.235294103622436523e+00 3.430935058593750000e+03 3.744826555252075195e+00 1.000000000000000000e+00 4.154469299316406250e+02 6.675000000000000000e+01 4.975000000000000000e+01
1.000000000000000000e+00 2.195076923076923094e+02 1.340261688232421875e+02 3.498809814453125000e+00 0.000000000000000000e+00 1.705882310867309570e+00 3.392912841796875000e+03 3.709064483642578125e+00 1.000000000000000000e+00 4.669223327636718750e+02 6.725000000000000000e+01 4.975000000000000000e+01
0.000000000000000000e+00 2.266692307692307793e+02 1.321549224853515625e+02 3.348510742187500000e+00 0.000000000000000000e+00 2.058823585510253906e+00 3.347945312500000000e+03 3.681286811828613281e+00 1.000000000000000000e+00 4.803587646484375000e+02 6.775000000000000000e+01 4.975000000000000000e+01
1.000000000000000000e+00 2.336769230769231740e+02 1.176350021362304688e+02 3.140167236328125000e+00 0.000000000000000000e+00 1.411764740943908691e+00 3.296032714843750000e+03 3.666399240493774414e+00 1.000000000000000000e+00 4.808114929199218750e+02 6.825000000000000000e+01 4.975000000000000000e+01
0.000000000000000000e+00 2.370692307692308134e+02 1.080469589233398438e+02 2.931793212890625000e+00 0.000000000000000000e+00 1.588235259056091309e+00 3.244120117187500000e+03 3.682972192764282227e+00 1.000000000000000000e+00 4.773418884277343750e+02 6.875000000000000000e+01 4.975000000000000000e+01
0.000000000000000000e+00 2.511769230769230319e+02 1.112458419799804688e+02 2.491973876953125000e+00 0.000000000000000000e+00 8.823529481887817383e-01 3.148325683593750000e+03 3.708216428756713867e+00 1.000000000000000000e+00 3.709397583007812500e+02 6.975000000000000000e+01 4.975000000000000000e+01
0.000000000000000000e+00 2.599538461538462570e+02 1.227519531250000000e+02 2.252746582031250000e+00 0.000000000000000000e+00 1.705882310867309570e+00 3.107120605468750000e+03 3.671756267547607422e+00 1.000000000000000000e+00 3.866385192871093750e+02 7.025000000000000000e+01 4.975000000000000000e+01
1.000000000000000000e+00 2.737307692307692832e+02 1.397968292236328125e+02 2.013549804687500000e+00 0.000000000000000000e+00 1.352941155433654785e+00 3.065915771484375000e+03 3.642703056335449219e+00 1.000000000000000000e+00 3.999355468750000000e+02 7.075000000000000000e+01 4.975000000000000000e+01
0.000000000000000000e+00 2.951153846153846985e+02 1.713705902099609375e+02 1.562042236328125000e+00 0.000000000000000000e+00 1.647058844566345215e+00 3.003700927734375000e+03 3.648517370223999023e+00 1.000000000000000000e+00 4.428870849609375000e+02 7.175000000000000000e+01 4.975000000000000000e+01
1.000000000000000000e+00 3.222076923076922981e+02 1.971613006591796875e+02 1.137481689453125000e+00 0.000000000000000000e+00 2.058823585510253906e+00 2.961681152343750000e+03 3.660606861114501953e+00 1.000000000000000000e+00 4.794966430664062500e+02 7.275000000000000000e+01 4.975000000000000000e+01
2.000000000000000000e+00 3.310076923076920821e+02 2.034340667724609375e+02 9.394226074218750000e-01 0.000000000000000000e+00 1.058823585510253906e+00 2.944663330078125000e+03 3.595859766006469727e+00 1.000000000000000000e+00 5.604520263671875000e+02 7.325000000000000000e+01 4.975000000000000000e+01
0.000000000000000000e+00 3.182000000000000455e+02 2.013410034179687500e+02 7.840881347656250000e-01 0.000000000000000000e+00 2.529411792755126953e+00 2.939621826171875000e+03 3.545578718185424805e+00 1.000000000000000000e+00 6.215637207031250000e+02 7.375000000000000000e+01 4.975000000000000000e+01
0.000000000000000000e+00 3.003384615384616723e+02 1.930811157226562500e+02 6.287536621093750000e-01 0.000000000000000000e+00 2.176470518112182617e+00 2.934580322265625000e+03 3.530096292495727539e+00 1.000000000000000000e+00 6.455614013671875000e+02 7.425000000000000000e+01 4.975000000000000000e+01
1.000000000000000000e+00 2.838692307692307963e+02 1.434580383300781250e+02 1.842041015625000000e-01 0.000000000000000000e+00 1.882352948188781738e+00 2.928959716796875000e+03 3.425528049468994141e+00 1.000000000000000000e+00 6.965888671875000000e+02 7.625000000000000000e+01 4.975000000000000000e+01
2.000000000000000000e+00 2.768538461538460638e+02 1.262620773315429688e+02 9.957885742187500000e-02 0.000000000000000000e+00 2.294117689132690430e+00 2.929736572265625000e+03 3.420818567276000977e+00 1.000000000000000000e+00 6.959348754882812500e+02 7.675000000000000000e+01 4.975000000000000000e+01
3.000000000000000000e+00 2.828384615384616723e+02 1.127729339599609375e+02 8.972167968750000000e-02 0.000000000000000000e+00 1.941176414489746094e+00 2.929880859375000000e+03 3.433294296264648438e+00 1.000000000000000000e+00 6.701433715820312500e+02 7.725000000000000000e+01 4.975000000000000000e+01
1.000000000000000000e+00 2.876461538461537657e+02 1.064116897583007812e+02 1.047973632812500000e-01 0.000000000000000000e+00 2.117647171020507812e+00 2.929814453125000000e+03 3.443200588226318359e+00 1.000000000000000000e+00 5.742697753906250000e+02 7.775000000000000000e+01 4.975000000000000000e+01
2.000000000000000000e+00 2.868846153846153584e+02 1.100695190429687500e+02 1.198730468750000000e-01 0.000000000000000000e+00 1.705882310867309570e+00 2.929748046875000000e+03 3.524059057235717773e+00 1.000000000000000000e+00 4.755857849121093750e+02 7.825000000000000000e+01 4.975000000000000000e+01
1.000000000000000000e+00 2.899923076923078611e+02 1.197701644897460938e+02 1.349487304687500000e-01 0.000000000000000000e+00 8.823529481887817383e-01 2.929681396484375000e+03 3.619015932083129883e+00 1.000000000000000000e+00 3.873152465820312500e+02 7.875000000000000000e+01 4.975000000000000000e+01
0.000000000000000000e+00 2.909923076923076906e+02 1.307881164550781250e+02 2.781677246093750000e-01 0.000000000000000000e+00 6.470588445663452148e-01 2.905001953125000000e+03 3.696367502212524414e+00 1.000000000000000000e+00 3.678356933593750000e+02 7.925000000000000000e+01 4.975000000000000000e+01
0.000000000000000000e+00 3.154076923076923435e+02 1.396275787353515625e+02 4.213867187500000000e-01 0.000000000000000000e+00 8.235294222831726074e-01 2.880322509765625000e+03 3.690374612808227539e+00 1.000000000000000000e+00 3.985234375000000000e+02 7.975000000000000000e+01 4.975000000000000000e+01
0.000000000000000000e+00 3.505692307692306713e+02 1.477606658935546875e+02 5.646057128906250000e-01 0.000000000000000000e+00 2.000000000000000000e+00 2.855643066406250000e+03 3.664635419845581055e+00 1.000000000000000000e+00 3.955085449218750000e+02 8.025000000000000000e+01 4.975000000000000000e+01
1.000000000000000000e+00 3.553384615384615586e+02 1.579284820556640625e+02 6.442871093750000000e-01 0.000000000000000000e+00 1.764705896377563477e+00 2.815005615234375000e+03 3.670020580291748047e+00 1.000000000000000000e+00 3.237826232910156250e+02 8.075000000000000000e+01 4.975000000000000000e+01
1.000000000000000000e+00 3.716692307692306940e+02 1.743805541992187500e+02 5.334472656250000000e-01 0.000000000000000000e+00 1.823529362678527832e+00 2.726494384765625000e+03 3.665182590484619141e+00 1.000000000000000000e+00 3.713047485351562500e+02 8.125000000000000000e+01 4.975000000000000000e+01
3.000000000000000000e+00 3.848615384615385437e+02 1.937989654541015625e+02 4.226074218750000000e-01 0.000000000000000000e+00 2.352941274642944336e+00 2.637983154296875000e+03 3.644282341003417969e+00 1.000000000000000000e+00 5.368754272460937500e+02 8.175000000000000000e+01 4.975000000000000000e+01
0.000000000000000000e+00 4.052692307692307168e+02 2.132760925292968750e+02 3.117675781250000000e-01 0.000000000000000000e+00 2.000000000000000000e+00 2.549471923828125000e+03 3.593922853469848633e+00 1.000000000000000000e+00 4.319941711425781250e+02 8.225000000000000000e+01 4.975000000000000000e+01
7.000000000000000000e+00 4.527923076923078725e+02 2.440789031982421875e+02 -8.177185058593750000e-01 0.000000000000000000e+00 7.647058963775634766e-01 2.233129882812500000e+03 8.952579498291015625e-01 1.000000000000000000e+00 8.571044311523437500e+02 8.325000000000000000e+01 4.975000000000000000e+01
5.000000000000000000e+00 4.722000000000000455e+02 2.479223785400390625e+02 -1.533782958984375000e+00 0.000000000000000000e+00 1.117647051811218262e+00 2.051738769531250000e+03 8.651158809661865234e-01 1.000000000000000000e+00 7.676626586914062500e+02 8.375000000000000000e+01 4.975000000000000000e+01
5.400000000000000000e+01 4.500000000000002274e+02 2.247646636962890625e+02 -3.289764404296875000e+00 0.000000000000000000e+00 0.000000000000000000e+00 1.715451049804687500e+03 8.541413545608520508e-01 4.000000000000000000e+00 7.869642944335937500e+02 8.475000000000000000e+01 4.975000000000000000e+01
7.000000000000000000e+00 5.089923076923075769e+02 2.325597839355468750e+02 -5.585540771484375000e+00 6.079667806625366211e-01 0.000000000000000000e+00 1.423320922851562500e+03 1.746511936187744141e+00 1.000000000000000000e+00 1.976670654296875000e+03 8.575000000000000000e+01 4.975000000000000000e+01
2.700000000000000000e+01 4.362384615384615927e+02 1.623410186767578125e+02 -8.930816650390625000e+00 2.308959811925888062e-01 4.705882370471954346e-01 1.085083007812500000e+03 1.583642601966857910e+00 3.000000000000000000e+00 1.797632568359375000e+03 8.725000000000000000e+01 4.975000000000000000e+01
1.000000000000000000e+00 2.633999999999999204e+02 6.722472381591796875e+01 -6.360900878906250000e+00 2.601747214794158936e-01 0.000000000000000000e+00 1.458925659179687500e+03 1.768720626831054688e+00 1.000000000000000000e+00 1.426160888671875000e+03 9.225000000000000000e+01 4.975000000000000000e+01
7.000000000000000000e+00 2.824923076923075769e+02 6.885751342773437500e+01 -5.512695312500000000e+00 4.203034341335296631e-01 0.000000000000000000e+00 1.538365722656250000e+03 2.229433536529541016e+00 1.000000000000000000e+00 1.621878173828125000e+03 9.275000000000000000e+01 4.975000000000000000e+01
4.000000000000000000e+00 2.888307692307691923e+02 7.571196746826171875e+01 -4.664489746093750000e+00 3.044470548629760742e-01 0.000000000000000000e+00 1.617805786132812500e+03 3.140352249145507812e+00 1.000000000000000000e+00 1.322893920898437500e+03 9.325000000000000000e+01 4.975000000000000000e+01
2.000000000000000000e+00 2.796461538461536520e+02 8.691390228271484375e+01 -3.816284179687500000e+00 1.099262386560440063e-01 0.000000000000000000e+00 1.697245849609375000e+03 3.156114339828491211e+00 1.000000000000000000e+00 1.192617065429687500e+03 9.375000000000000000e+01 4.975000000000000000e+01
1.000000000000000000e+00 2.597769230769230262e+02 9.150524139404296875e+01 -3.677581787109375000e+00 1.102035492658615112e-01 0.000000000000000000e+00 1.693125122070312500e+03 3.175129413604736328e+00 1.000000000000000000e+00 1.168820068359375000e+03 9.425000000000000000e+01 4.975000000000000000e+01
0.000000000000000000e+00 2.641615384615383846e+02 6.681826782226562500e+01 -3.400238037109375000e+00 2.285868674516677856e-01 2.941176593303680420e-01 1.684883544921875000e+03 2.804803371429443359e+00 1.000000000000000000e+00 1.500683837890625000e+03 9.525000000000000000e+01 4.975000000000000000e+01
1.000000000000000000e+00 2.557999999999999261e+02 5.259814453125000000e+01 -3.498382568359375000e+00 2.395952939987182617e-01 3.529411852359771729e-01 1.661473632812500000e+03 2.905348539352416992e+00 1.000000000000000000e+00 1.367520141601562500e+03 9.575000000000000000e+01 4.975000000000000000e+01
2.000000000000000000e+00 2.751692307692308077e+02 5.604034805297851562e+01 -4.307128906250000000e+00 2.233457565307617188e-01 7.647058963775634766e-01 1.580196411132812500e+03 2.538956165313720703e+00 1.000000000000000000e+00 1.418304321289062500e+03 9.625000000000000000e+01 4.975000000000000000e+01
1.000000000000000000e+00 2.981692307692306940e+02 6.495356750488281250e+01 -5.115844726562500000e+00 3.344115614891052246e-01 8.235294222831726074e-01 1.498919067382812500e+03 2.523407936096191406e+00 1.000000000000000000e+00 1.572165405273437500e+03 9.675000000000000000e+01 4.975000000000000000e+01
3.000000000000000000e+00 3.008538461538461775e+02 1.053934173583984375e+02 -7.884124755859375000e+00 7.067556977272033691e-01 2.352941185235977173e-01 1.298314697265625000e+03 2.425126075744628906e+00 1.000000000000000000e+00 1.917974365234375000e+03 9.875000000000000000e+01 4.975000000000000000e+01
1.000000000000000000e+00 2.966384615384616836e+02 1.105170822143554688e+02 -8.506195068359375000e+00 4.644856750965118408e-01 0.000000000000000000e+00 1.266839355468750000e+03 2.508086919784545898e+00 1.000000000000000000e+00 1.800669067382812500e+03 9.925000000000000000e+01 4.975000000000000000e+01
1.000000000000000000e+00 3.049461538461539476e+02 1.060897216796875000e+02 -8.113952636718750000e+00 4.709204435348510742e-01 0.000000000000000000e+00 1.346614746093750000e+03 2.595296144485473633e+00 1.000000000000000000e+00 1.667606201171875000e+03 1.002500000000000000e+02 4.975000000000000000e+01
1.000000000000000000e+00 3.129384615384614676e+02 1.086398468017578125e+02 -7.800964355468750000e+00 5.390911102294921875e-01 1.176470592617988586e-01 1.396697265625000000e+03 2.668597221374511719e+00 1.000000000000000000e+00 1.771545898437500000e+03 1.007500000000000000e+02 4.975000000000000000e+01
7.000000000000000000e+00 3.600615384615383618e+02 1.187851409912109375e+02 -7.487945556640625000e+00 3.497714102268218994e-01 5.882352963089942932e-02 1.446779663085937500e+03 2.723887205123901367e+00 1.000000000000000000e+00 1.700238891601562500e+03 1.012500000000000000e+02 4.975000000000000000e+01
6.000000000000000000e+00 4.368692307692307963e+02 1.224423904418945312e+02 -5.913299560546875000e+00 1.394434124231338501e-01 0.000000000000000000e+00 1.656429565429687500e+03 2.701228618621826172e+00 1.000000000000000000e+00 1.455679809570312500e+03 1.022500000000000000e+02 4.975000000000000000e+01
7.000000000000000000e+00 4.845615384615383618e+02 1.292156677246093750e+02 -4.411376953125000000e+00 9.999999776482582092e-03 3.529411852359771729e-01 1.858016723632812500e+03 1.507123351097106934e+00 1.000000000000000000e+00 1.108085205078125000e+03 1.032500000000000000e+02 4.975000000000000000e+01
2.400000000000000000e+01 5.358923076923076678e+02 1.359039306640625000e+02 -3.914886474609375000e+00 4.308626651763916016e-01 5.882353186607360840e-01 1.930590942382812500e+03 1.463162183761596680e+00 3.000000000000000000e+00 1.538532592773437500e+03 1.037500000000000000e+02 4.975000000000000000e+01
3.700000000000000000e+01 5.101230769230768942e+02 1.334439849853515625e+02 -3.418395996093750000e+00 3.411347866058349609e-01 1.235294103622436523e+00 2.003165283203125000e+03 1.498859882354736328e+00 3.000000000000000000e+00 1.368642822265625000e+03 1.042500000000000000e+02 4.975000000000000000e+01
4.500000000000000000e+01 4.329615384615383391e+02 1.295039367675781250e+02 -2.767578125000000000e+00 9.999999776482582092e-03 1.294117689132690430e+00 2.106724121093750000e+03 2.021936178207397461e+00 4.000000000000000000e+00 8.286411743164062500e+02 1.052500000000000000e+02 4.975000000000000000e+01
2.000000000000000000e+00 3.862000000000000455e+02 1.269965744018554688e+02 -2.955352783203125000e+00 9.999999776482582092e-03 3.529411852359771729e-01 2.096118652343750000e+03 3.199309349060058594e+00 1.000000000000000000e+00 8.266903686523437500e+02 1.057500000000000000e+02 4.975000000000000000e+01
4.000000000000000000e+00 3.569999999999998863e+02 1.245152664184570312e+02 -3.143127441406250000e+00 9.999999776482582092e-03 6.470588445663452148e-01 2.085513183593750000e+03 3.204431056976318359e+00 1.000000000000000000e+00 7.695438842773437500e+02 1.062500000000000000e+02 4.975000000000000000e+01
2.000000000000000000e+00 3.400692307692307850e+02 1.172096023559570312e+02 -3.330902099609375000e+00 0.000000000000000000e+00 4.117647111415863037e-01 2.074907714843750000e+03 3.195493936538696289e+00 1.000000000000000000e+00 7.108585205078125000e+02 1.067500000000000000e+02 4.975000000000000000e+01
5.000000000000000000e+00 3.422307692307691696e+02 9.971758270263671875e+01 -3.796020507812500000e+00 9.999999776482582092e-03 1.764705896377563477e+00 2.039930297851562500e+03 3.084169387817382812e+00 1.000000000000000000e+00 9.032209472656250000e+02 1.072500000000000000e+02 4.975000000000000000e+01
2.300000000000000000e+01 3.504153846153845961e+02 9.005242919921875000e+01 -4.353576660156250000e+00 9.999999776482582092e-03 1.235294103622436523e+00 1.996828857421875000e+03 1.032015919685363770e+00 3.000000000000000000e+00 9.041325073242187500e+02 1.077500000000000000e+02 4.975000000000000000e+01
5.800000000000000000e+01 3.801307692307694310e+02 1.050424804687500000e+02 -4.911132812500000000e+00 1.282742619514465332e-01 0.000000000000000000e+00 1.953727294921875000e+03 7.576540708541870117e-01 4.000000000000000000e+00 1.307337280273437500e+03 1.082500000000000000e+02 4.975000000000000000e+01
5.400000000000000000e+01 4.079692307692306485e+02 1.198545303344726562e+02 -5.468719482421875000e+00 4.308566749095916748e-01 0.000000000000000000e+00 1.910625854492187500e+03 7.399197220802307129e-01 4.000000000000000000e+00 1.415283447265625000e+03 1.087500000000000000e+02 4.975000000000000000e+01
6.100000000000000000e+01 3.958615384615383732e+02 1.266448135375976562e+02 -5.608154296875000000e+00 3.826378881931304932e-01 0.000000000000000000e+00 1.921930664062500000e+03 7.259808182716369629e-01 4.000000000000000000e+00 1.314523681640625000e+03 1.092500000000000000e+02 4.975000000000000000e+01
4.300000000000000000e+01 3.979307692307692719e+02 1.275125122070312500e+02 -5.747589111328125000e+00 4.398185610771179199e-01 0.000000000000000000e+00 1.933235473632812500e+03 1.428784132003784180e+00 3.000000000000000000e+00 1.450375366210937500e+03 1.097500000000000000e+02 4.975000000000000000e+01
5.900000000000000000e+01 3.861153846153846416e+02 1.277441024780273438e+02 -5.887023925781250000e+00 4.321057200431823730e-01 0.000000000000000000e+00 1.944540283203125000e+03 1.578655958175659180e+00 4.000000000000000000e+00 1.425306518554687500e+03 1.102500000000000000e+02 4.975000000000000000e+01
5.800000000000000000e+01 3.787230769230769170e+02 1.344859619140625000e+02 -5.897949218750000000e+00 4.570476412773132324e-01 2.941176593303680420e-01 1.974271606445312500e+03 7.104550600051879883e-01 4.000000000000000000e+00 1.598697509765625000e+03 1.107500000000000000e+02 4.975000000000000000e+01
4.900000000000000000e+01 3.691000000000000227e+02 1.405735778808593750e+02 -5.523345947265625000e+00 4.142910838127136230e-01 7.647058963775634766e-01 2.059281982421875000e+03 1.814116477966308594e+00 4.000000000000000000e+00 1.546195190429687500e+03 1.112500000000000000e+02 4.975000000000000000e+01
2.500000000000000000e+01 3.450153846153845052e+02 1.398301696777343750e+02 -5.148742675781250000e+00 3.518521487712860107e-01 1.352941155433654785e+00 2.144292724609375000e+03 1.502190113067626953e+00 3.000000000000000000e+00 1.017266357421875000e+03 1.117500000000000000e+02 4.975000000000000000e+01
1.000000000000000000e+01 3.117615384615382936e+02 1.308282012939453125e+02 -4.774108886718750000e+00 2.059225291013717651e-01 6.470588445663452148e-01 2.229303222656250000e+03 1.786854386329650879e+00 3.000000000000000000e+00 1.223580444335937500e+03 1.122500000000000000e+02 4.975000000000000000e+01
3.000000000000000000e+00 2.507692307692306883e+02 1.082758178710937500e+02 -1.509185791015625000e+00 9.999999776482582092e-03 1.176470637321472168e+00 2.812543945312500000e+03 3.402950048446655273e+00 1.000000000000000000e+00 6.835950927734375000e+02 1.162500000000000000e+02 4.975000000000000000e+01
3.000000000000000000e+00 2.571307692307692605e+02 1.133317871093750000e+02 -1.792816162109375000e+00 9.999999776482582092e-03 2.411764621734619141e+00 2.769893066406250000e+03 3.373692512512207031e+00 1.000000000000000000e+00 6.650125732421875000e+02 1.167500000000000000e+02 4.975000000000000000e+01
2.000000000000000000e+00 2.782923076923076451e+02 1.237486572265625000e+02 -2.360137939453125000e+00 9.999999776482582092e-03 2.470588207244873047e+00 2.684591308593750000e+03 3.310668468475341797e+00 1.000000000000000000e+00 6.714757080078125000e+02 1.177500000000000000e+02 4.975000000000000000e+01
6.000000000000000000e+00 3.349307692307692719e+02 1.530654754638671875e+02 -3.993560791015625000e+00 1.913748383522033691e-01 5.294117927551269531e-01 2.473116210937500000e+03 1.949220061302185059e+00 1.000000000000000000e+00 7.919398803710937500e+02 1.197500000000000000e+02 4.975000000000000000e+01
5.000000000000000000e+00 3.672692307692308873e+02 1.624007110595703125e+02 -4.209716796875000000e+00 1.370861381292343140e-01 3.529411852359771729e-01 2.444989990234375000e+03 1.748966097831726074e+00 1.000000000000000000e+00 7.350533447265625000e+02 1.202500000000000000e+02 4.975000000000000000e+01
1.300000000000000000e+01 4.128769230769229353e+02 1.836990051269531250e+02 -4.199981689453125000e+00 2.856955528259277344e-01 5.294117927551269531e-01 2.442938964843750000e+03 1.576481342315673828e+00 3.000000000000000000e+00 7.996951293945312500e+02 1.212500000000000000e+02 4.975000000000000000e+01
3.900000000000000000e+01 4.387307692307689990e+02 1.946033172607421875e+02 -4.195129394531250000e+00 2.738085985183715820e-01 2.941176593303680420e-01 2.441913330078125000e+03 1.526755690574645996e+00 3.000000000000000000e+00 8.980419921875000000e+02 1.217500000000000000e+02 4.975000000000000000e+01
4.800000000000000000e+01 4.591153846153847553e+02 2.019014434814453125e+02 -3.967559814453125000e+00 3.836179971694946289e-01 0.000000000000000000e+00 2.471595947265625000e+03 1.293154835700988770e+00 4.000000000000000000e+00 9.319741210937500000e+02 1.222500000000000000e+02 4.975000000000000000e+01
5.000000000000000000e+01 4.661307692307692605e+02 2.048110961914062500e+02 -3.665802001953125000e+00 2.533273398876190186e-01 0.000000000000000000e+00 2.511514404296875000e+03 7.881581187248229980e-01 4.000000000000000000e+00 8.605672607421875000e+02 1.227500000000000000e+02 4.975000000000000000e+01
5.200000000000000000e+01 4.645846153846154039e+02 2.041121215820312500e+02 -3.364013671875000000e+00 1.713103950023651123e-01 8.235294222831726074e-01 2.551432861328125000e+03 8.160780072212219238e-01 4.000000000000000000e+00 6.216581420898437500e+02 1.232500000000000000e+02 4.975000000000000000e+01
3.300000000000000000e+01 4.681769230769231740e+02 2.010673828125000000e+02 -3.062225341796875000e+00 1.340445280075073242e-01 9.411764740943908691e-01 2.591351562500000000e+03 8.425769805908203125e-01 3.000000000000000000e+00 4.688455505371093750e+02 1.237500000000000000e+02 4.975000000000000000e+01
1.100000000000000000e+01 4.573307692307692491e+02 1.966285858154296875e+02 -2.794097900390625000e+00 9.999999776482582092e-03 1.705882310867309570e+00 2.625273681640625000e+03 1.344345927238464355e+00 3.000000000000000000e+00 4.278029479980468750e+02 1.242500000000000000e+02 4.975000000000000000e+01
3.000000000000000000e+01 4.647307692307692264e+02 1.967105407714843750e+02 -2.257781982421875000e+00 9.999999776482582092e-03 1.823529362678527832e+00 2.693117675781250000e+03 1.088619828224182129e+00 3.000000000000000000e+00 3.406540527343750000e+02 1.252500000000000000e+02 4.975000000000000000e+01
2.000000000000000000e+01 4.910615384615384755e+02 2.203910980224609375e+02 -1.977630615234375000e+00 9.999999776482582092e-03 1.882352948188781738e+00 2.715507324218750000e+03 8.900213241577148438e-01 3.000000000000000000e+00 4.009504394531250000e+02 1.262500000000000000e+02 4.975000000000000000e+01
5.000000000000000000e+01 5.118230769230773944e+02 2.318462066650390625e+02 -1.914428710937500000e+00 9.999999776482582092e-03 1.647058844566345215e+00 2.713065917968750000e+03 8.876445889472961426e-01 4.000000000000000000e+00 5.261071777343750000e+02 1.267500000000000000e+02 4.975000000000000000e+01
5.100000000000000000e+01 5.320692307692307850e+02 2.302368469238281250e+02 -1.851196289062500000e+00 9.999999776482582092e-03 1.294117689132690430e+00 2.710624511718750000e+03 8.882653117179870605e-01 4.000000000000000000e+00 3.464579772949218750e+02 1.272500000000000000e+02 4.975000000000000000e+01
1.100000000000000000e+01 5.451230769230771784e+02 2.275093078613281250e+02 -1.938293457031250000e+00 9.999999776482582092e-03 4.294117450714111328e+00 2.691807373046875000e+03 1.530327320098876953e+00 3.000000000000000000e+00 1.166994705200195312e+02 1.277500000000000000e+02 4.975000000000000000e+01
2.000000000000000000e+01 5.860000000000001137e+02 2.372519683837890625e+02 -2.413146972656250000e+00 9.999999776482582092e-03 3.705882310867309570e+00 2.621422607421875000e+03 1.805348873138427734e+00 3.000000000000000000e+00 1.693102111816406250e+02 1.287500000000000000e+02 4.975000000000000000e+01
1.000000000000000000e+01 6.054153846153848235e+02 2.479423217773437500e+02 -2.650543212890625000e+00 0.000000000000000000e+00 3.529411792755126953e+00 2.586229980468750000e+03 1.842937111854553223e+00 3.000000000000000000e+00 1.752112274169921875e+02 1.292500000000000000e+02 4.975000000000000000e+01
1.700000000000000000e+01 6.137307692307689422e+02 2.500552673339843750e+02 -2.901824951171875000e+00 0.000000000000000000e+00 2.294117689132690430e+00 2.543000488281250000e+03 1.517778515815734863e+00 3.000000000000000000e+00 1.176140823364257812e+02 1.297500000000000000e+02 4.975000000000000000e+01
5.500000000000000000e+01 6.230461538461541977e+02 2.475750122070312500e+02 -3.157684326171875000e+00 9.999999776482582092e-03 1.529411792755126953e+00 2.497092041015625000e+03 9.053010940551757812e-01 4.000000000000000000e+00 2.492586517333984375e+02 1.302500000000000000e+02 4.975000000000000000e+01
5.900000000000000000e+01 6.250846153846152902e+02 2.523646545410156250e+02 -3.413574218750000000e+00 9.999999776482582092e-03 1.000000000000000000e+00 2.451183349609375000e+03 8.944998383522033691e-01 4.000000000000000000e+00 2.366170806884765625e+02 1.307500000000000000e+02 4.975000000000000000e+01
4.900000000000000000e+01 6.263538461538460069e+02 2.592683715820312500e+02 -3.669433593750000000e+00 9.999999776482582092e-03 5.882353186607360840e-01 2.405274902343750000e+03 8.867794275283813477e-01 4.000000000000000000e+00 4.667245178222656250e+02 1.312500000000000000e+02 4.975000000000000000e+01
2.900000000000000000e+01 6.263307692307694197e+02 2.667835693359375000e+02 -3.853546142578125000e+00 9.999999776482582092e-03 3.529411852359771729e-01 2.368954345703125000e+03 8.786159753799438477e-01 3.000000000000000000e+00 4.428935546875000000e+02 1.317500000000000000e+02 4.975000000000000000e+01
5.700000000000000000e+01 6.320384615384616609e+02 2.771599731445312500e+02 -4.037689208984375000e+00 1.167771518230438232e-01 1.000000000000000000e+00 2.332634033203125000e+03 1.107336282730102539e+00 4.000000000000000000e+00 4.382658081054687500e+02 1.322500000000000000e+02 4.975000000000000000e+01
7.300000000000000000e+01 6.457384615384614790e+02 2.888651733398437500e+02 -4.221801757812500000e+00 3.336113989353179932e-01 1.058823585510253906e+00 2.296313476562500000e+03 1.855956554412841797e+00 4.000000000000000000e+00 6.602211303710937500e+02 1.327500000000000000e+02 4.975000000000000000e+01
6.500000000000000000e+01 6.474153846153842551e+02 2.960467529296875000e+02 -4.385528564453125000e+00 2.261265665292739868e-01 5.882352963089942932e-02 2.259483154296875000e+03 9.869022369384765625e-01 4.000000000000000000e+00 4.456413879394531250e+02 1.332500000000000000e+02 4.975000000000000000e+01
6.700000000000000000e+01 6.604692307692309896e+02 2.944852905273437500e+02 -4.488037109375000000e+00 3.219946324825286865e-01 0.000000000000000000e+00 2.221122802734375000e+03 1.359122753143310547e+00 4.000000000000000000e+00 6.282218017578125000e+02 1.337500000000000000e+02 4.975000000000000000e+01
7.000000000000000000e+01 6.610076923076923094e+02 2.899763488769531250e+02 -4.590576171875000000e+00 1.690489649772644043e-01 0.000000000000000000e+00 2.182762451171875000e+03 2.697454690933227539e+00 4.000000000000000000e+00 4.806740112304687500e+02 1.342500000000000000e+02 4.975000000000000000e+01
7.000000000000000000e+01 6.512461538461541295e+02 2.851723327636718750e+02 -4.693084716796875000e+00 9.999999776482582092e-03 0.000000000000000000e+00 2.144402099609375000e+03 2.930305242538452148e+00 4.000000000000000000e+00 2.602401123046875000e+02 1.347500000000000000e+02 4.975000000000000000e+01
3.600000000000000000e+01 6.378153846153848008e+02 2.737886352539062500e+02 -4.666320800781250000e+00 0.000000000000000000e+00 6.470588445663452148e-01 2.122094726562500000e+03 1.613836765289306641e+00 3.000000000000000000e+00 5.316024398803710938e+01 1.352500000000000000e+02 4.975000000000000000e+01
5.800000000000000000e+01 6.737923076923077588e+02 2.362305603027343750e+02 -3.911254882812500000e+00 0.000000000000000000e+00 5.882352963089942932e-02 2.092062255859375000e+03 1.701410651206970215e+00 4.000000000000000000e+00 7.474510192871093750e+01 1.372500000000000000e+02 4.975000000000000000e+01
6.400000000000000000e+01 6.942000000000002728e+02 2.616874389648437500e+02 -3.580902099609375000e+00 9.999999776482582092e-03 5.882353186607360840e-01 2.079121826171875000e+03 1.671973347663879395e+00 4.000000000000000000e+00 3.394137878417968750e+02 1.377500000000000000e+02 4.975000000000000000e+01
6.600000000000000000e+01 7.242769230769231399e+02 2.851803588867187500e+02 -3.250549316406250000e+00 2.805599272251129150e-01 5.882353186607360840e-01 2.066181396484375000e+03 1.474567532539367676e+00 4.000000000000000000e+00 7.584486083984375000e+02 1.382500000000000000e+02 4.975000000000000000e+01
6.600000000000000000e+01 7.483461538461536975e+02 2.959532470703125000e+02 -2.920196533203125000e+00 4.587093591690063477e-01 5.882352963089942932e-02 2.053240966796875000e+03 1.396842122077941895e+00 4.000000000000000000e+00 7.998759155273437500e+02 1.387500000000000000e+02 4.975000000000000000e+01
6.400000000000000000e+01 7.752692307692306031e+02 3.141547851562500000e+02 -2.415222167968750000e+00 2.836545109748840332e-01 5.882352963089942932e-02 1.971642089843750000e+03 1.374069929122924805e+00 4.000000000000000000e+00 7.156657104492187500e+02 1.392500000000000000e+02 4.975000000000000000e+01
5.500000000000000000e+01 7.690230769230770420e+02 3.211788635253906250e+02 -1.910278320312500000e+00 9.999999776482582092e-03 1.176470592617988586e-01 1.890043212890625000e+03 1.372367858886718750e+00 4.000000000000000000e+00 3.645273437500000000e+02 1.397500000000000000e+02 4.975000000000000000e+01
6.700000000000000000e+01 8.073076923076922640e+02 4.170779418945312500e+02 3.474731445312500000e-01 0.000000000000000000e+00 2.352941185235977173e-01 1.885787963867187500e+03 1.401044487953186035e+00 4.000000000000000000e+00 1.249980697631835938e+02 1.432500000000000000e+02 4.975000000000000000e+01
6.000000000000000000e+01 7.976615384615381572e+02 4.180166015625000000e+02 4.095153808593750000e-01 9.999999776482582092e-03 3.529411852359771729e-01 1.815111572265625000e+03 1.389523148536682129e+00 4.000000000000000000e+00 4.311282348632812500e+02 1.437500000000000000e+02 4.975000000000000000e+01
6.000000000000000000e+00 8.939076923076925141e+02 3.799632873535156250e+02 9.344726562500000000e+00 0.000000000000000000e+00 0.000000000000000000e+00 4.089642578125000000e+03 4.084489822387695312e+00 1.000000000000000000e+00 1.473168487548828125e+02 3.750000000000000000e+00 5.025000000000000000e+01
6.900000000000000000e+01 1.047484615384615381e+03 5.419167480468750000e+02 8.124877929687500000e+00 0.000000000000000000e+00 0.000000000000000000e+00 3.758247802734375000e+03 3.866378307342529297e+00 4.000000000000000000e+00 4.837304687500000000e+02 6.250000000000000000e+00 5.025000000000000000e+01
1.000000000000000000e+01 9.266076923076919911e+02 4.385803527832031250e+02 7.890533447265625000e+00 0.000000000000000000e+00 0.000000000000000000e+00 3.693072753906250000e+03 3.881037950515747070e+00 3.000000000000000000e+00 5.417729492187500000e+02 6.750000000000000000e+00 5.025000000000000000e+01
3.300000000000000000e+01 7.496769230769225487e+02 4.128960266113281250e+02 6.730560302734375000e+00 0.000000000000000000e+00 0.000000000000000000e+00 3.362058349609375000e+03 3.120617866516113281e+00 3.000000000000000000e+00 3.809897155761718750e+02 9.750000000000000000e+00 5.025000000000000000e+01
7.000000000000000000e+01 6.376769230769227761e+02 4.068925476074218750e+02 6.314788818359375000e+00 0.000000000000000000e+00 0.000000000000000000e+00 3.248278808593750000e+03 3.694885492324829102e+00 4.000000000000000000e+00 4.127864074707031250e+02 1.125000000000000000e+01 5.025000000000000000e+01
4.000000000000000000e+00 7.019538461538458023e+02 3.936773071289062500e+02 6.258270263671875000e+00 0.000000000000000000e+00 0.000000000000000000e+00 3.239178710937500000e+03 3.619990110397338867e+00 1.000000000000000000e+00 6.020910644531250000e+02 1.175000000000000000e+01 5.025000000000000000e+01
3.100000000000000000e+01 6.967538461538465526e+02 3.620275268554687500e+02 6.201751708984375000e+00 0.000000000000000000e+00 0.000000000000000000e+00 3.230078613281250000e+03 3.606309652328491211e+00 3.000000000000000000e+00 5.811096191406250000e+02 1.225000000000000000e+01 5.025000000000000000e+01
6.000000000000000000e+00 6.174384615384616382e+02 3.399205932617187500e+02 6.087493896484375000e+00 0.000000000000000000e+00 0.000000000000000000e+00 3.216045654296875000e+03 3.708185434341430664e+00 1.000000000000000000e+00 4.377872314453125000e+02 1.325000000000000000e+01 5.025000000000000000e+01
6.000000000000000000e+00 6.397461538461539021e+02 3.241922302246093750e+02 5.848907470703125000e+00 0.000000000000000000e+00 2.941176593303680420e-01 3.248097412109375000e+03 3.873911619186401367e+00 1.000000000000000000e+00 2.197875213623046875e+02 1.525000000000000000e+01 5.025000000000000000e+01
1.600000000000000000e+01 8.825923076923077133e+02 3.594293823242187500e+02 5.704772949218750000e+00 0.000000000000000000e+00 2.941176593303680420e-01 3.281436035156250000e+03 3.528355598449707031e+00 3.000000000000000000e+00 6.434946899414062500e+02 1.675000000000000000e+01 5.025000000000000000e+01
4.100000000000000000e+01 8.755307692307687830e+02 3.838501281738281250e+02 5.697357177734375000e+00 0.000000000000000000e+00 5.882353186607360840e-01 3.292209472656250000e+03 3.518067359924316406e+00 3.000000000000000000e+00 6.589221191406250000e+02 1.725000000000000000e+01 5.025000000000000000e+01
1.700000000000000000e+01 6.492846153846154493e+02 3.354954528808593750e+02 5.274169921875000000e+00 0.000000000000000000e+00 0.000000000000000000e+00 3.202254638671875000e+03 3.890549659729003906e+00 3.000000000000000000e+00 2.079707641601562500e+02 2.175000000000000000e+01 5.025000000000000000e+01
5.700000000000000000e+01 6.837615384615384073e+02 2.747684936523437500e+02 5.128265380859375000e+00 0.000000000000000000e+00 0.000000000000000000e+00 3.153944335937500000e+03 3.833923578262329102e+00 4.000000000000000000e+00 2.461745147705078125e+02 2.325000000000000000e+01 5.025000000000000000e+01
1.300000000000000000e+01 7.020307692307698062e+02 3.284448547363281250e+02 5.154327392578125000e+00 0.000000000000000000e+00 5.294117927551269531e-01 3.164246826171875000e+03 3.780141592025756836e+00 3.000000000000000000e+00 2.140594940185546875e+02 2.525000000000000000e+01 5.025000000000000000e+01
4.700000000000000000e+01 6.284769230769231854e+02 3.126645202636718750e+02 5.222900390625000000e+00 0.000000000000000000e+00 1.117647051811218262e+00 3.184010253906250000e+03 3.816481828689575195e+00 4.000000000000000000e+00 2.303730926513671875e+02 2.575000000000000000e+01 5.025000000000000000e+01
4.900000000000000000e+01 5.221769230769231172e+02 3.289512329101562500e+02 5.418853759765625000e+00 0.000000000000000000e+00 1.058823585510253906e+00 3.245002441406250000e+03 3.972846746444702148e+00 4.000000000000000000e+00 2.390455169677734375e+02 2.675000000000000000e+01 5.025000000000000000e+01
6.600000000000000000e+01 5.407538461538462116e+02 3.331781616210937500e+02 5.673645019531250000e+00 0.000000000000000000e+00 8.235294222831726074e-01 3.327460693359375000e+03 3.936590433120727539e+00 4.000000000000000000e+00 2.249753265380859375e+02 2.775000000000000000e+01 5.025000000000000000e+01
2.100000000000000000e+01 5.956538461538464162e+02 3.315913696289062500e+02 5.789001464843750000e+00 0.000000000000000000e+00 2.352941185235977173e-01 3.381699218750000000e+03 3.828429937362670898e+00 3.000000000000000000e+00 2.212607116699218750e+02 2.875000000000000000e+01 5.025000000000000000e+01
7.000000000000000000e+00 5.999538461538460297e+02 3.209728393554687500e+02 5.629852294921875000e+00 0.000000000000000000e+00 2.352941185235977173e-01 3.410464843750000000e+03 4.011056423187255859e+00 1.000000000000000000e+00 9.913691711425781250e+01 3.075000000000000000e+01 5.025000000000000000e+01
8.000000000000000000e+00 5.858769230769230489e+02 3.355695800781250000e+02 4.976531982421875000e+00 0.000000000000000000e+00 2.176470518112182617e+00 3.331287841796875000e+03 3.954276561737060547e+00 1.000000000000000000e+00 1.128058624267578125e+02 3.325000000000000000e+01 5.025000000000000000e+01
1.100000000000000000e+01 5.771692307692309214e+02 3.020957946777343750e+02 4.890014648437500000e+00 0.000000000000000000e+00 1.823529362678527832e+00 3.318977294921875000e+03 3.929584741592407227e+00 3.000000000000000000e+00 1.376412353515625000e+02 3.475000000000000000e+01 5.025000000000000000e+01
1.000000000000000000e+00 5.086000000000001364e+02 2.956375427246093750e+02 5.121643066406250000e+00 0.000000000000000000e+00 1.941176414489746094e+00 3.429851806640625000e+03 3.954874038696289062e+00 1.000000000000000000e+00 1.410500335693359375e+02 4.025000000000000000e+01 5.025000000000000000e+01
2.000000000000000000e+00 4.949615384615383959e+02 2.926911926269531250e+02 5.001281738281250000e+00 0.000000000000000000e+00 2.000000000000000000e+00 3.440684326171875000e+03 3.948700428009033203e+00 1.000000000000000000e+00 1.269865188598632812e+02 4.125000000000000000e+01 5.025000000000000000e+01
7.000000000000000000e+00 4.666153846153843574e+02 2.844582519531250000e+02 4.933166503906250000e+00 0.000000000000000000e+00 1.470588207244873047e+00 3.452236083984375000e+03 3.960728168487548828e+00 1.000000000000000000e+00 1.366279449462890625e+02 4.175000000000000000e+01 5.025000000000000000e+01
0.000000000000000000e+00 4.397076923076921275e+02 2.676234436035156250e+02 4.753540039062500000e+00 0.000000000000000000e+00 2.411764621734619141e+00 3.491139160156250000e+03 3.982270240783691406e+00 1.000000000000000000e+00 1.193383712768554688e+02 4.325000000000000000e+01 5.025000000000000000e+01
1.000000000000000000e+00 3.490076923076922526e+02 2.209643859863281250e+02 5.210510253906250000e+00 0.000000000000000000e+00 1.705882310867309570e+00 3.710172851562500000e+03 4.098303318023681641e+00 1.000000000000000000e+00 4.948295593261718750e+01 4.675000000000000000e+01 5.025000000000000000e+01
4.000000000000000000e+00 3.338692307692307963e+02 2.004794311523437500e+02 5.265106201171875000e+00 0.000000000000000000e+00 2.470588207244873047e+00 3.732342529296875000e+03 4.096775054931640625e+00 1.000000000000000000e+00 4.101073837280273438e+01 4.725000000000000000e+01 5.025000000000000000e+01
1.000000000000000000e+00 3.232692307692306031e+02 1.834217834472656250e+02 5.304626464843750000e+00 0.000000000000000000e+00 2.529411792755126953e+00 3.750555908203125000e+03 4.090108871459960938e+00 1.000000000000000000e+00 3.416706466674804688e+01 4.775000000000000000e+01 5.025000000000000000e+01
1.000000000000000000e+00 3.304846153846155516e+02 1.770958099365234375e+02 5.344146728515625000e+00 0.000000000000000000e+00 1.117647051811218262e+00 3.768769287109375000e+03 4.085069656372070312e+00 1.000000000000000000e+00 2.636934661865234375e+01 4.825000000000000000e+01 5.025000000000000000e+01
1.000000000000000000e+00 3.415153846153845052e+02 1.739706573486328125e+02 5.383666992187500000e+00 0.000000000000000000e+00 2.117647171020507812e+00 3.786982666015625000e+03 4.084331989288330078e+00 1.000000000000000000e+00 1.766300392150878906e+01 4.875000000000000000e+01 5.025000000000000000e+01
1.000000000000000000e+00 3.446230769230768942e+02 1.656091308593750000e+02 5.307006835937500000e+00 0.000000000000000000e+00 1.882352948188781738e+00 3.777433105468750000e+03 4.094158649444580078e+00 1.000000000000000000e+00 1.249991226196289062e+01 4.925000000000000000e+01 5.025000000000000000e+01
1.000000000000000000e+00 3.395230769230767010e+02 1.555928802490234375e+02 5.230316162109375000e+00 0.000000000000000000e+00 2.294117689132690430e+00 3.767883300781250000e+03 4.091942310333251953e+00 1.000000000000000000e+00 6.677546977996826172e+00 4.975000000000000000e+01 5.025000000000000000e+01
1.000000000000000000e+00 3.273230769230768260e+02 1.455321807861328125e+02 5.153656005859375000e+00 0.000000000000000000e+00 2.235294103622436523e+00 3.758333496093750000e+03 4.088665008544921875e+00 1.000000000000000000e+00 1.100003242492675781e+01 5.025000000000000000e+01 5.025000000000000000e+01
1.000000000000000000e+00 3.106999999999998749e+02 1.359085083007812500e+02 5.062530517578125000e+00 0.000000000000000000e+00 2.058823585510253906e+00 3.744642822265625000e+03 4.089344978332519531e+00 1.000000000000000000e+00 1.301812934875488281e+01 5.075000000000000000e+01 5.025000000000000000e+01
0.000000000000000000e+00 2.926769230769231172e+02 1.327524719238281250e+02 4.928100585937500000e+00 0.000000000000000000e+00 8.235294222831726074e-01 3.718528320312500000e+03 4.086934089660644531e+00 1.000000000000000000e+00 1.114481639862060547e+01 5.125000000000000000e+01 5.025000000000000000e+01
1.000000000000000000e+00 2.820000000000001137e+02 1.336360778808593750e+02 4.793670654296875000e+00 0.000000000000000000e+00 1.352941155433654785e+00 3.692414062500000000e+03 4.075087070465087891e+00 1.000000000000000000e+00 3.199220466613769531e+01 5.175000000000000000e+01 5.025000000000000000e+01
1.000000000000000000e+00 2.789538461538460865e+02 1.338374481201171875e+02 4.659210205078125000e+00 0.000000000000000000e+00 2.117647171020507812e+00 3.666299804687500000e+03 4.071187496185302734e+00 1.000000000000000000e+00 2.151124763488769531e+01 5.225000000000000000e+01 5.025000000000000000e+01
2.000000000000000000e+00 2.855307692307692946e+02 1.342438049316406250e+02 4.522766113281250000e+00 0.000000000000000000e+00 1.823529362678527832e+00 3.637744140625000000e+03 4.069428443908691406e+00 1.000000000000000000e+00 3.546777343750000000e+01 5.275000000000000000e+01 5.025000000000000000e+01
0.000000000000000000e+00 2.966461538461538225e+02 1.393390350341796875e+02 4.245880126953125000e+00 0.000000000000000000e+00 2.470588207244873047e+00 3.575750732421875000e+03 4.027208328247070312e+00 1.000000000000000000e+00 9.765464782714843750e+01 5.375000000000000000e+01 5.025000000000000000e+01
0.000000000000000000e+00 2.974153846153845961e+02 1.441764984130859375e+02 4.107421875000000000e+00 0.000000000000000000e+00 2.647058725357055664e+00 3.544753906250000000e+03 3.991571903228759766e+00 1.000000000000000000e+00 1.476154479980468750e+02 5.425000000000000000e+01 5.025000000000000000e+01
1.000000000000000000e+00 3.024153846153845961e+02 1.523732757568359375e+02 3.950256347656250000e+00 0.000000000000000000e+00 1.882352948188781738e+00 3.506269042968750000e+03 3.960270404815673828e+00 1.000000000000000000e+00 2.235674896240234375e+02 5.475000000000000000e+01 5.025000000000000000e+01
1.000000000000000000e+00 3.051000000000000796e+02 1.631326293945312500e+02 3.786834716796875000e+00 0.000000000000000000e+00 2.411764621734619141e+00 3.465288330078125000e+03 3.938151359558105469e+00 1.000000000000000000e+00 1.815377655029296875e+02 5.525000000000000000e+01 5.025000000000000000e+01
1.000000000000000000e+00 3.110999999999999659e+02 1.747928009033203125e+02 3.623443603515625000e+00 0.000000000000000000e+00 3.058823585510253906e+00 3.424307617187500000e+03 3.918377399444580078e+00 1.000000000000000000e+00 2.139141387939453125e+02 5.575000000000000000e+01 5.025000000000000000e+01
1.000000000000000000e+00 3.201846153846153697e+02 1.910374450683593750e+02 3.298400878906250000e+00 0.000000000000000000e+00 2.823529481887817383e+00 3.350475097656250000e+03 3.843447208404541016e+00 1.000000000000000000e+00 2.893678894042968750e+02 5.675000000000000000e+01 5.025000000000000000e+01
4.000000000000000000e+00 3.221384615384615699e+02 1.951402130126953125e+02 3.136779785156250000e+00 0.000000000000000000e+00 2.000000000000000000e+00 3.317623535156250000e+03 3.813518524169921875e+00 1.000000000000000000e+00 2.218945312500000000e+02 5.725000000000000000e+01 5.025000000000000000e+01
1.000000000000000000e+00 3.171846153846154266e+02 1.948723449707031250e+02 2.975128173828125000e+00 0.000000000000000000e+00 2.470588207244873047e+00 3.284771728515625000e+03 3.773738861083984375e+00 1.000000000000000000e+00 3.391576232910156250e+02 5.775000000000000000e+01 5.025000000000000000e+01
0.000000000000000000e+00 2.946692307692306940e+02 1.855166320800781250e+02 2.758148193359375000e+00 0.000000000000000000e+00 2.294117689132690430e+00 3.263926025390625000e+03 3.787460088729858398e+00 1.000000000000000000e+00 3.055620117187500000e+02 5.875000000000000000e+01 5.025000000000000000e+01
0.000000000000000000e+00 2.834000000000000341e+02 1.749133758544921875e+02 2.681518554687500000e+00 0.000000000000000000e+00 2.823529481887817383e+00 3.266960449218750000e+03 3.793394565582275391e+00 1.000000000000000000e+00 2.965870666503906250e+02 5.925000000000000000e+01 5.025000000000000000e+01
0.000000000000000000e+00 2.563923076923076678e+02 1.444937591552734375e+02 2.585449218750000000e+00 0.000000000000000000e+00 1.823529362678527832e+00 3.281915039062500000e+03 3.826776981353759766e+00 1.000000000000000000e+00 2.472017059326171875e+02 6.025000000000000000e+01 5.025000000000000000e+01
1.000000000000000000e+00 2.337076923076922981e+02 1.255012893676757812e+02 2.660858154296875000e+00 0.000000000000000000e+00 1.647058844566345215e+00 3.323526367187500000e+03 3.857076168060302734e+00 1.000000000000000000e+00 2.428709869384765625e+02 6.125000000000000000e+01 5.025000000000000000e+01
0.000000000000000000e+00 2.296153846153846132e+02 1.200947265625000000e+02 2.698547363281250000e+00 0.000000000000000000e+00 1.823529362678527832e+00 3.344332031250000000e+03 3.877423048019409180e+00 1.000000000000000000e+00 2.400000305175781250e+02 6.175000000000000000e+01 5.025000000000000000e+01
1.000000000000000000e+00 2.206461538461538510e+02 1.171087036132812500e+02 2.799316406250000000e+00 0.000000000000000000e+00 2.000000000000000000e+00 3.365613525390625000e+03 3.899681091308593750e+00 1.000000000000000000e+00 2.223447875976562500e+02 6.225000000000000000e+01 5.025000000000000000e+01
1.000000000000000000e+00 2.155615384615384755e+02 1.149163360595703125e+02 2.921142578125000000e+00 0.000000000000000000e+00 1.470588207244873047e+00 3.387053466796875000e+03 3.917106628417968750e+00 1.000000000000000000e+00 1.524803771972656250e+02 6.275000000000000000e+01 5.025000000000000000e+01
0.000000000000000000e+00 2.147615384615384926e+02 1.074651412963867188e+02 3.042938232421875000e+00 0.000000000000000000e+00 1.529411792755126953e+00 3.408493408203125000e+03 3.926539897918701172e+00 1.000000000000000000e+00 1.872868499755859375e+02 6.325000000000000000e+01 5.025000000000000000e+01
1.000000000000000000e+00 2.080538461538461661e+02 1.029233093261718750e+02 3.164733886718750000e+00 0.000000000000000000e+00 1.411764740943908691e+00 3.429933349609375000e+03 3.942543029785156250e+00 1.000000000000000000e+00 1.219822235107421875e+02 6.375000000000000000e+01 5.025000000000000000e+01
0.000000000000000000e+00 2.074461538461538339e+02 9.990744781494140625e+01 3.267700195312500000e+00 0.000000000000000000e+00 2.411764621734619141e+00 3.434792236328125000e+03 3.943053483963012695e+00 1.000000000000000000e+00 9.936236572265625000e+01 6.425000000000000000e+01 5.025000000000000000e+01
0.000000000000000000e+00 2.047615384615384642e+02 9.998576354980468750e+01 3.370697021484375000e+00 0.000000000000000000e+00 2.529411792755126953e+00 3.439650878906250000e+03 3.932579994201660156e+00 1.000000000000000000e+00 1.502098846435546875e+02 6.475000000000000000e+01 5.025000000000000000e+01
0.000000000000000000e+00 2.050538461538462229e+02 9.943278503417968750e+01 3.473663330078125000e+00 0.000000000000000000e+00 1.294117689132690430e+00 3.444509521484375000e+03 3.908832788467407227e+00 1.000000000000000000e+00 1.470150146484375000e+02 6.525000000000000000e+01 5.025000000000000000e+01
0.000000000000000000e+00 2.112999999999999261e+02 1.027985763549804688e+02 3.537017822265625000e+00 0.000000000000000000e+00 1.823529362678527832e+00 3.440634521484375000e+03 3.877827882766723633e+00 1.000000000000000000e+00 2.188484954833984375e+02 6.575000000000000000e+01 5.025000000000000000e+01
1.000000000000000000e+00 2.133307692307692207e+02 1.217122116088867188e+02 3.481567382812500000e+00 0.000000000000000000e+00 1.588235259056091309e+00 3.410558593750000000e+03 3.837792158126831055e+00 1.000000000000000000e+00 2.219410247802734375e+02 6.625000000000000000e+01 5.025000000000000000e+01
0.000000000000000000e+00 2.274615384615384244e+02 1.414566345214843750e+02 3.249877929687500000e+00 0.000000000000000000e+00 1.647058844566345215e+00 3.310841064453125000e+03 3.761889457702636719e+00 1.000000000000000000e+00 3.264411315917968750e+02 6.775000000000000000e+01 5.025000000000000000e+01
0.000000000000000000e+00 2.318307692307692776e+02 1.284418487548828125e+02 3.063720703125000000e+00 0.000000000000000000e+00 1.882352948188781738e+00 3.261785888671875000e+03 3.757547140121459961e+00 1.000000000000000000e+00 3.265113220214843750e+02 6.825000000000000000e+01 5.025000000000000000e+01
1.000000000000000000e+00 2.909769230769231854e+02 1.581514739990234375e+02 1.822204589843750000e+00 0.000000000000000000e+00 2.176470518112182617e+00 2.998191894531250000e+03 3.678549289703369141e+00 1.000000000000000000e+00 3.931163330078125000e+02 7.125000000000000000e+01 5.025000000000000000e+01
0.000000000000000000e+00 3.068230769230770534e+02 1.690922088623046875e+02 1.604400634765625000e+00 0.000000000000000000e+00 2.529411792755126953e+00 2.974288574218750000e+03 3.655518531799316406e+00 1.000000000000000000e+00 4.050573425292968750e+02 7.175000000000000000e+01 5.025000000000000000e+01
2.000000000000000000e+00 2.854384615384615245e+02 1.683820190429687500e+02 3.752441406250000000e-01 0.000000000000000000e+00 1.647058844566345215e+00 2.895221435546875000e+03 3.524822235107421875e+00 1.000000000000000000e+00 6.101552734375000000e+02 7.525000000000000000e+01 5.025000000000000000e+01
1.000000000000000000e+00 2.844615384615385096e+02 1.415603790283203125e+02 2.331542968750000000e-01 0.000000000000000000e+00 1.000000000000000000e+00 2.901149414062500000e+03 3.462228536605834961e+00 1.000000000000000000e+00 6.118051757812500000e+02 7.625000000000000000e+01 5.025000000000000000e+01
1.000000000000000000e+00 2.634384615384616382e+02 1.268571853637695312e+02 1.621093750000000000e-01 0.000000000000000000e+00 1.294117689132690430e+00 2.904113525390625000e+03 3.560824394226074219e+00 1.000000000000000000e+00 4.230213012695312500e+02 7.675000000000000000e+01 5.025000000000000000e+01
0.000000000000000000e+00 2.715153846153846189e+02 1.167353515625000000e+02 3.265075683593750000e-01 0.000000000000000000e+00 1.823529362678527832e+00 2.920961181640625000e+03 3.745369672775268555e+00 1.000000000000000000e+00 2.539526367187500000e+02 7.875000000000000000e+01 5.025000000000000000e+01
0.000000000000000000e+00 2.868384615384616723e+02 1.309755554199218750e+02 4.533996582031250000e-01 0.000000000000000000e+00 1.588235259056091309e+00 2.894641601562500000e+03 3.741411209106445312e+00 1.000000000000000000e+00 2.428670959472656250e+02 7.925000000000000000e+01 5.025000000000000000e+01
2.000000000000000000e+00 3.065538461538461092e+02 1.451329650878906250e+02 5.802612304687500000e-01 0.000000000000000000e+00 6.470588445663452148e-01 2.868322265625000000e+03 3.727236747741699219e+00 1.000000000000000000e+00 3.380545349121093750e+02 7.975000000000000000e+01 5.025000000000000000e+01
0.000000000000000000e+00 3.298769230769231058e+02 1.555369720458984375e+02 7.071228027343750000e-01 0.000000000000000000e+00 5.882352963089942932e-02 2.842002685546875000e+03 3.738618612289428711e+00 1.000000000000000000e+00 2.329769592285156250e+02 8.025000000000000000e+01 5.025000000000000000e+01
3.000000000000000000e+00 3.609846153846153243e+02 1.704836883544921875e+02 7.582702636718750000e-01 0.000000000000000000e+00 1.058823585510253906e+00 2.797453613281250000e+03 3.576315641403198242e+00 1.000000000000000000e+00 2.693361206054687500e+02 8.075000000000000000e+01 5.025000000000000000e+01
5.600000000000000000e+01 4.827769230769230262e+02 2.699453125000000000e+02 -2.625427246093750000e-01 0.000000000000000000e+00 1.764705896377563477e+00 2.349771484375000000e+03 1.842337727546691895e+00 4.000000000000000000e+00 5.601923828125000000e+02 8.275000000000000000e+01 5.025000000000000000e+01
5.000000000000000000e+00 5.594923076923075769e+02 2.692866210937500000e+02 -2.689331054687500000e+00 5.554957389831542969e-01 0.000000000000000000e+00 1.747664428710937500e+03 1.457944869995117188e+00 1.000000000000000000e+00 1.784354614257812500e+03 8.425000000000000000e+01 5.025000000000000000e+01
4.200000000000000000e+01 5.343000000000000682e+02 2.456836853027343750e+02 -3.742675781250000000e+00 3.916903436183929443e-01 5.882352963089942932e-02 1.596920532226562500e+03 2.556859254837036133e+00 3.000000000000000000e+00 1.598643920898437500e+03 8.475000000000000000e+01 5.025000000000000000e+01
5.600000000000000000e+01 5.223923076923076678e+02 2.349637756347656250e+02 -4.877502441406250000e+00 1.404767334461212158e-01 0.000000000000000000e+00 1.462829345703125000e+03 2.681305885314941406e+00 4.000000000000000000e+00 1.555259887695312500e+03 8.525000000000000000e+01 5.025000000000000000e+01
2.100000000000000000e+01 4.760692307692306144e+02 2.360423278808593750e+02 -7.147155761718750000e+00 3.292347192764282227e-01 0.000000000000000000e+00 1.194647094726562500e+03 2.191519498825073242e+00 3.000000000000000000e+00 1.904590576171875000e+03 8.625000000000000000e+01 5.025000000000000000e+01
1.100000000000000000e+01 4.492230769230769738e+02 2.100226898193359375e+02 -8.131134033203125000e+00 3.825060427188873291e-01 5.882352963089942932e-02 1.114274902343750000e+03 2.431538581848144531e+00 3.000000000000000000e+00 1.643565673828125000e+03 8.675000000000000000e+01 5.025000000000000000e+01
4.000000000000000000e+00 4.301384615384614563e+02 1.205886383056640625e+02 -1.009909057617187500e+01 5.081699490547180176e-01 2.352941185235977173e-01 9.535303955078125000e+02 1.857879400253295898e+00 1.000000000000000000e+00 1.800085083007812500e+03 8.775000000000000000e+01 5.025000000000000000e+01
1.000000000000000000e+00 3.233923076923076678e+02 8.114678192138671875e+01 -3.327789306640625000e+00 9.999999776482582092e-03 5.882353186607360840e-01 1.722368286132812500e+03 2.493554353713989258e+00 1.000000000000000000e+00 8.451375122070312500e+02 9.375000000000000000e+01 5.025000000000000000e+01
1.000000000000000000e+00 3.127846153846153925e+02 8.231511688232421875e+01 -3.200836181640625000e+00 9.999999776482582092e-03 0.000000000000000000e+00 1.717877319335937500e+03 3.164200544357299805e+00 1.000000000000000000e+00 9.137860717773437500e+02 9.425000000000000000e+01 5.025000000000000000e+01
2.000000000000000000e+00 2.936076923076922753e+02 7.817037963867187500e+01 -3.073913574218750000e+00 1.173233911395072937e-01 2.941176593303680420e-01 1.713386352539062500e+03 3.287425041198730469e+00 1.000000000000000000e+00 1.120840454101562500e+03 9.475000000000000000e+01 5.025000000000000000e+01
2.600000000000000000e+01 2.949153846153844256e+02 7.035367584228515625e+01 -2.946990966796875000e+00 1.010051071643829346e-01 5.294117927551269531e-01 1.708895385742187500e+03 3.046304702758789062e+00 3.000000000000000000e+00 1.172561035156250000e+03 9.525000000000000000e+01 5.025000000000000000e+01
8.000000000000000000e+00 3.283461538461539249e+02 6.582400512695312500e+01 -3.075775146484375000e+00 7.348976731300354004e-01 1.882352948188781738e+00 1.682141479492187500e+03 2.313219785690307617e+00 1.000000000000000000e+00 1.885563476562500000e+03 9.575000000000000000e+01 5.025000000000000000e+01
6.000000000000000000e+00 3.554076923076923435e+02 1.206260375976562500e+02 -8.080963134765625000e+00 7.160409092903137207e-01 2.352941185235977173e-01 1.258772216796875000e+03 2.077064037322998047e+00 1.000000000000000000e+00 1.998361083984375000e+03 9.875000000000000000e+01 5.025000000000000000e+01
3.300000000000000000e+01 4.049538461538460297e+02 1.224992980957031250e+02 -7.903045654296875000e+00 7.004255652427673340e-01 5.882352963089942932e-02 1.379915893554687500e+03 2.671245574951171875e+00 3.000000000000000000e+00 1.724268554687500000e+03 1.012500000000000000e+02 5.025000000000000000e+01
3.600000000000000000e+01 5.055538461538462798e+02 1.311143798828125000e+02 -6.246643066406250000e+00 3.937230408191680908e-01 0.000000000000000000e+00 1.590500244140625000e+03 2.749874114990234375e+00 3.000000000000000000e+00 1.497812622070312500e+03 1.022500000000000000e+02 5.025000000000000000e+01
3.000000000000000000e+01 5.767692307692306031e+02 1.401393585205078125e+02 -5.418457031250000000e+00 1.875744611024856567e-01 5.882353186607360840e-01 1.695792358398437500e+03 1.952105760574340820e+00 3.000000000000000000e+00 1.470627563476562500e+03 1.027500000000000000e+02 5.025000000000000000e+01
4.300000000000000000e+01 6.531153846153846416e+02 1.541737365722656250e+02 -4.651794433593750000e+00 4.991805851459503174e-01 8.823529481887817383e-01 1.794485961914062500e+03 1.589421868324279785e+00 3.000000000000000000e+00 1.605010742187500000e+03 1.032500000000000000e+02 5.025000000000000000e+01
2.300000000000000000e+01 6.570153846153845052e+02 1.588341064453125000e+02 -4.069732666015625000e+00 1.375535577535629272e-01 1.000000000000000000e+00 1.873383789062500000e+03 1.443492174148559570e+00 3.000000000000000000e+00 1.156281005859375000e+03 1.037500000000000000e+02 5.025000000000000000e+01
6.600000000000000000e+01 6.256769230769230035e+02 1.587823944091796875e+02 -3.487670898437500000e+00 2.892604768276214600e-01 1.176470592617988586e-01 1.952281738281250000e+03 1.506144404411315918e+00 4.000000000000000000e+00 1.266083374023437500e+03 1.042500000000000000e+02 5.025000000000000000e+01
5.000000000000000000e+00 5.111999999999998749e+02 1.464736022949218750e+02 -2.679290771484375000e+00 2.290734797716140747e-01 1.764705896377563477e+00 2.067472412109375000e+03 2.111310720443725586e+00 1.000000000000000000e+00 1.134926391601562500e+03 1.052500000000000000e+02 5.025000000000000000e+01
2.900000000000000000e+01 4.433846153846153584e+02 1.415364379882812500e+02 -2.808746337890625000e+00 1.564346551895141602e-01 1.882352948188781738e+00 2.061160156250000000e+03 3.114890813827514648e+00 3.000000000000000000e+00 1.004894531250000000e+03 1.057500000000000000e+02 5.025000000000000000e+01
6.000000000000000000e+00 3.832384615384614790e+02 1.393335723876953125e+02 -2.938201904296875000e+00 0.000000000000000000e+00 2.117647171020507812e+00 2.054847900390625000e+03 3.284044981002807617e+00 1.000000000000000000e+00 7.126439208984375000e+02 1.062500000000000000e+02 5.025000000000000000e+01
6.000000000000000000e+00 3.632230769230769170e+02 1.198712921142578125e+02 -3.502838134765625000e+00 9.999999776482582092e-03 6.470588445663452148e-01 2.013378906250000000e+03 2.618690490722656250e+00 1.000000000000000000e+00 8.488868408203125000e+02 1.072500000000000000e+02 5.025000000000000000e+01
6.200000000000000000e+01 3.878307692307691923e+02 1.189689788818359375e+02 -4.039916992187500000e+00 1.716171801090240479e-01 5.882353186607360840e-01 1.968607177734375000e+03 7.896538376808166504e-01 4.000000000000000000e+00 1.089145019531250000e+03 1.077500000000000000e+02 5.025000000000000000e+01
3.500000000000000000e+01 3.841307692307690900e+02 1.303887939453125000e+02 -4.576995849609375000e+00 1.570272892713546753e-01 1.117647051811218262e+00 1.923835449218750000e+03 7.856416106224060059e-01 3.000000000000000000e+00 1.044261352539062500e+03 1.082500000000000000e+02 5.025000000000000000e+01
4.000000000000000000e+01 3.871846153846153697e+02 1.431017303466796875e+02 -5.114074707031250000e+00 9.999999776482582092e-03 3.529411852359771729e-01 1.879063720703125000e+03 7.891605496406555176e-01 3.000000000000000000e+00 9.339588012695312500e+02 1.087500000000000000e+02 5.025000000000000000e+01
6.300000000000000000e+01 3.971769230769231172e+02 1.471048278808593750e+02 -5.330688476562500000e+00 3.331739008426666260e-01 1.058823585510253906e+00 1.884905395507812500e+03 7.650864720344543457e-01 4.000000000000000000e+00 1.387088378906250000e+03 1.092500000000000000e+02 5.025000000000000000e+01
4.400000000000000000e+01 3.955076923076927073e+02 1.482456970214843750e+02 -5.547302246093750000e+00 3.563883900642395020e-01 0.000000000000000000e+00 1.890747192382812500e+03 1.037041664123535156e+00 3.000000000000000000e+00 1.242942382812500000e+03 1.097500000000000000e+02 5.025000000000000000e+01
1.200000000000000000e+01 3.938923076923075541e+02 1.548592681884765625e+02 -5.841796875000000000e+00 3.354838788509368896e-01 2.941176593303680420e-01 1.920056884765625000e+03 8.728026747703552246e-01 3.000000000000000000e+00 1.116142578125000000e+03 1.107500000000000000e+02 5.025000000000000000e+01
5.600000000000000000e+01 3.782538461538460410e+02 1.518815765380859375e+02 -5.503601074218750000e+00 3.539665937423706055e-01 5.882353186607360840e-01 1.996403930664062500e+03 1.397162079811096191e+00 4.000000000000000000e+00 1.284374633789062500e+03 1.112500000000000000e+02 5.025000000000000000e+01
5.200000000000000000e+01 3.596692307692306940e+02 1.416297607421875000e+02 -5.165405273437500000e+00 4.488808214664459229e-01 1.058823585510253906e+00 2.072750976562500000e+03 1.411905646324157715e+00 4.000000000000000000e+00 1.593906860351562500e+03 1.117500000000000000e+02 5.025000000000000000e+01
4.900000000000000000e+01 3.426000000000001364e+02 1.297659301757812500e+02 -4.827178955078125000e+00 6.083596944808959961e-01 5.882353186607360840e-01 2.149097900390625000e+03 1.243371725082397461e+00 4.000000000000000000e+00 1.411474853515625000e+03 1.122500000000000000e+02 5.025000000000000000e+01
8.000000000000000000e+00 3.110692307692310123e+02 1.286554870605468750e+02 -4.368499755859375000e+00 2.719208002090454102e-01 1.176470637321472168e+00 2.242038330078125000e+03 2.243354797363281250e+00 1.000000000000000000e+00 1.200915649414062500e+03 1.127500000000000000e+02 5.025000000000000000e+01
7.000000000000000000e+00 2.817307692307692264e+02 1.195195770263671875e+02 -2.631103515625000000e+00 1.267765760421752930e-01 1.823529362678527832e+00 2.570639160156250000e+03 3.265826225280761719e+00 1.000000000000000000e+00 8.864410400390625000e+02 1.142500000000000000e+02 5.025000000000000000e+01
8.000000000000000000e+00 2.655461538461537998e+02 1.155613861083984375e+02 -2.333923339843750000e+00 9.999999776482582092e-03 1.647058844566345215e+00 2.627245361328125000e+03 3.406329631805419922e+00 1.000000000000000000e+00 7.487113037109375000e+02 1.147500000000000000e+02 5.025000000000000000e+01
2.000000000000000000e+00 2.661461538461539362e+02 1.140999374389648438e+02 -1.927551269531250000e+00 9.999999776482582092e-03 0.000000000000000000e+00 2.705172363281250000e+03 3.315467834472656250e+00 1.000000000000000000e+00 6.596975708007812500e+02 1.157500000000000000e+02 5.025000000000000000e+01
5.000000000000000000e+00 2.703538461538460638e+02 1.225864486694335938e+02 -1.993621826171875000e+00 1.658510863780975342e-01 1.823529362678527832e+00 2.705230712890625000e+03 2.453156232833862305e+00 1.000000000000000000e+00 9.496002197265625000e+02 1.167500000000000000e+02 5.025000000000000000e+01
2.000000000000000000e+00 2.892076923076923549e+02 1.317573699951171875e+02 -2.262878417968750000e+00 1.009324863553047180e-01 2.176470518112182617e+00 2.666325439453125000e+03 3.070638656616210938e+00 1.000000000000000000e+00 6.973150024414062500e+02 1.172500000000000000e+02 5.025000000000000000e+01
6.000000000000000000e+00 3.251769230769231740e+02 1.386900177001953125e+02 -3.298370361328125000e+00 1.363474577665328979e-01 3.058823585510253906e+00 2.531177246093750000e+03 2.489376306533813477e+00 1.000000000000000000e+00 7.644033203125000000e+02 1.187500000000000000e+02 5.025000000000000000e+01
1.000000000000000000e+00 3.485076923076921958e+02 1.508248291015625000e+02 -4.201202392578125000e+00 1.041206419467926025e-01 1.411764740943908691e+00 2.423875000000000000e+03 1.671390891075134277e+00 1.000000000000000000e+00 5.703580932617187500e+02 1.197500000000000000e+02 5.025000000000000000e+01
8.000000000000000000e+00 3.978153846153846871e+02 1.775301971435546875e+02 -4.489990234375000000e+00 2.276791632175445557e-01 1.000000000000000000e+00 2.387582763671875000e+03 1.550765752792358398e+00 1.000000000000000000e+00 7.386738281250000000e+02 1.207500000000000000e+02 5.025000000000000000e+01
3.800000000000000000e+01 4.237153846153846075e+02 1.904846191406250000e+02 -4.532043457031250000e+00 4.606032967567443848e-01 0.000000000000000000e+00 2.381271728515625000e+03 1.377848148345947266e+00 3.000000000000000000e+00 8.593809814453125000e+02 1.212500000000000000e+02 5.025000000000000000e+01
5.300000000000000000e+01 4.531307692307691468e+02 1.955736541748046875e+02 -4.574096679687500000e+00 5.429489016532897949e-01 5.882352963089942932e-02 2.374960449218750000e+03 1.389480352401733398e+00 4.000000000000000000e+00 9.764853515625000000e+02 1.217500000000000000e+02 5.025000000000000000e+01
4.900000000000000000e+01 4.646000000000001364e+02 1.951931610107421875e+02 -4.358062744140625000e+00 2.783548235893249512e-01 0.000000000000000000e+00 2.403577880859375000e+03 7.732042670249938965e-01 4.000000000000000000e+00 7.652266235351562500e+02 1.222500000000000000e+02 5.025000000000000000e+01
5.700000000000000000e+01 4.691769230769232308e+02 2.006266021728515625e+02 -4.056030273437500000e+00 3.299607336521148682e-01 5.294117927551269531e-01 2.443837890625000000e+03 7.663060426712036133e-01 4.000000000000000000e+00 8.202119140625000000e+02 1.227500000000000000e+02 5.025000000000000000e+01
4.900000000000000000e+01 4.768692307692308532e+02 2.053149414062500000e+02 -3.753997802734375000e+00 3.288129866123199463e-01 2.941176593303680420e-01 2.484098144531250000e+03 7.803637981414794922e-01 4.000000000000000000e+00 6.886178588867187500e+02 1.232500000000000000e+02 5.025000000000000000e+01
3.200000000000000000e+01 4.840076923076921389e+02 2.022002258300781250e+02 -3.451965332031250000e+00 1.861265301704406738e-01 5.294117927551269531e-01 2.524358398437500000e+03 7.938984036445617676e-01 3.000000000000000000e+00 5.566898193359375000e+02 1.237500000000000000e+02 5.025000000000000000e+01
1.100000000000000000e+01 4.663076923076922640e+02 1.965357055664062500e+02 -2.818206787109375000e+00 9.999999776482582092e-03 1.000000000000000000e+00 2.603249267578125000e+03 1.715497016906738281e+00 3.000000000000000000e+00 3.649181213378906250e+02 1.247500000000000000e+02 5.025000000000000000e+01
3.800000000000000000e+01 4.614846153846153811e+02 2.031966705322265625e+02 -2.501312255859375000e+00 9.999999776482582092e-03 1.529411792755126953e+00 2.642694824218750000e+03 1.196899771690368652e+00 3.000000000000000000e+00 3.203098754882812500e+02 1.252500000000000000e+02 5.025000000000000000e+01
3.300000000000000000e+01 4.691153846153848122e+02 2.114214324951171875e+02 -2.242645263671875000e+00 1.060778573155403137e-01 2.235294103622436523e+00 2.672505615234375000e+03 1.530210971832275391e+00 3.000000000000000000e+00 4.947650146484375000e+02 1.257500000000000000e+02 5.025000000000000000e+01
3.100000000000000000e+01 5.031000000000002501e+02 2.233520965576171875e+02 -2.158569335937500000e+00 1.391417831182479858e-01 2.294117689132690430e+00 2.673412841796875000e+03 1.109868049621582031e+00 3.000000000000000000e+00 5.090593566894531250e+02 1.262500000000000000e+02 5.025000000000000000e+01
4.200000000000000000e+01 5.110769230769227534e+02 2.320367736816406250e+02 -2.074493408203125000e+00 1.577079892158508301e-01 1.470588207244873047e+00 2.674320312500000000e+03 8.596883416175842285e-01 3.000000000000000000e+00 5.123468017578125000e+02 1.267500000000000000e+02 5.025000000000000000e+01
3.500000000000000000e+01 5.222615384615384073e+02 2.328780975341796875e+02 -1.990447998046875000e+00 0.000000000000000000e+00 5.882353186607360840e-01 2.675227539062500000e+03 1.137380719184875488e+00 3.000000000000000000e+00 2.185987396240234375e+02 1.272500000000000000e+02 5.025000000000000000e+01
7.000000000000000000e+00 5.427769230769229125e+02 2.311872406005859375e+02 -2.085296630859375000e+00 0.000000000000000000e+00 3.294117689132690430e+00 2.656245605468750000e+03 1.830146789550781250e+00 1.000000000000000000e+00 1.322566070556640625e+02 1.277500000000000000e+02 5.025000000000000000e+01
1.000000000000000000e+01 5.964538461538461434e+02 2.409259948730468750e+02 -2.632873535156250000e+00 9.999999776482582092e-03 3.529411792755126953e+00 2.578503662109375000e+03 1.814887285232543945e+00 3.000000000000000000e+00 2.274644012451171875e+02 1.287500000000000000e+02 5.025000000000000000e+01
2.600000000000000000e+01 6.201769230769230035e+02 2.442493591308593750e+02 -2.906646728515625000e+00 9.999999776482582092e-03 2.176470518112182617e+00 2.539632568359375000e+03 1.997451782226562500e+00 3.000000000000000000e+00 2.326413116455078125e+02 1.292500000000000000e+02 5.025000000000000000e+01
2.400000000000000000e+01 6.087076923076921275e+02 2.313113708496093750e+02 -3.228668212890625000e+00 9.999999776482582092e-03 1.588235259056091309e+00 2.486701416015625000e+03 2.031123638153076172e+00 3.000000000000000000e+00 2.794729309082031250e+02 1.297500000000000000e+02 5.025000000000000000e+01
4.500000000000000000e+01 6.288999999999999773e+02 2.328466949462890625e+02 -3.904815673828125000e+00 9.999999776482582092e-03 1.470588207244873047e+00 2.371465820312500000e+03 8.667392134666442871e-01 4.000000000000000000e+00 2.940028686523437500e+02 1.307500000000000000e+02 5.025000000000000000e+01
4.800000000000000000e+01 6.313076923076924913e+02 2.394390258789062500e+02 -4.242889404296875000e+00 2.969577014446258545e-01 5.882353186607360840e-01 2.313847900390625000e+03 8.498807549476623535e-01 4.000000000000000000e+00 4.539077148437500000e+02 1.312500000000000000e+02 5.025000000000000000e+01
6.800000000000000000e+01 6.359076923076928551e+02 2.492402801513671875e+02 -4.479278564453125000e+00 2.400152683258056641e-01 5.882352963089942932e-02 2.272724365234375000e+03 8.408353328704833984e-01 4.000000000000000000e+00 4.520592651367187500e+02 1.317500000000000000e+02 5.025000000000000000e+01
3.400000000000000000e+01 6.562461538461537884e+02 2.574144897460937500e+02 -4.715637207031250000e+00 1.804496198892593384e-01 5.882352963089942932e-02 2.231600585937500000e+03 9.010326862335205078e-01 3.000000000000000000e+00 4.453389892578125000e+02 1.322500000000000000e+02 5.025000000000000000e+01
3.500000000000000000e+01 6.558615384615386574e+02 2.650438842773437500e+02 -4.952026367187500000e+00 2.861317098140716553e-01 2.941176593303680420e-01 2.190476806640625000e+03 8.183802366256713867e-01 3.000000000000000000e+00 7.196923217773437500e+02 1.327500000000000000e+02 5.025000000000000000e+01
5.800000000000000000e+01 6.701384615384615699e+02 2.802762451171875000e+02 -5.162231445312500000e+00 2.732892930507659912e-01 2.941176593303680420e-01 2.149601074218750000e+03 1.309586524963378906e+00 4.000000000000000000e+00 6.719083251953125000e+02 1.332500000000000000e+02 5.025000000000000000e+01
2.500000000000000000e+01 6.795230769230770420e+02 2.908748779296875000e+02 -5.294006347656250000e+00 5.144358277320861816e-01 5.882352963089942932e-02 2.109469482421875000e+03 2.215307474136352539e+00 3.000000000000000000e+00 6.998667602539062500e+02 1.337500000000000000e+02 5.025000000000000000e+01
5.300000000000000000e+01 6.658846153846151310e+02 2.777305908203125000e+02 -5.521881103515625000e+00 3.062877953052520752e-01 5.882353186607360840e-01 2.013922729492187500e+03 1.228210210800170898e+00 4.000000000000000000e+00 5.830982666015625000e+02 1.352500000000000000e+02 5.025000000000000000e+01
6.500000000000000000e+01 6.533307692307694197e+02 2.575565490722656250e+02 -5.318878173828125000e+00 4.682733118534088135e-01 1.176470592617988586e-01 2.023488037109375000e+03 1.235353469848632812e+00 4.000000000000000000e+00 8.083577880859375000e+02 1.357500000000000000e+02 5.025000000000000000e+01
1.000000000000000000e+01 6.352923076923076451e+02 2.330328216552734375e+02 -5.115875244140625000e+00 1.516114771366119385e-01 1.352941155433654785e+00 2.033053222656250000e+03 1.434574127197265625e+00 3.000000000000000000e+00 5.940624389648437500e+02 1.362500000000000000e+02 5.025000000000000000e+01
4.600000000000000000e+01 6.294923076923072358e+02 2.094091949462890625e+02 -4.912872314453125000e+00 0.000000000000000000e+00 1.470588207244873047e+00 2.042618530273437500e+03 1.933886647224426270e+00 4.000000000000000000e+00 4.321461868286132812e+01 1.367500000000000000e+02 5.025000000000000000e+01
3.300000000000000000e+01 6.858538461538462343e+02 2.134303588867187500e+02 -4.251403808593750000e+00 9.999999776482582092e-03 3.529411852359771729e-01 2.040265991210937500e+03 2.203658580780029297e+00 3.000000000000000000e+00 3.316464538574218750e+02 1.377500000000000000e+02 5.025000000000000000e+01
6.000000000000000000e+01 7.281923076923079634e+02 2.427363891601562500e+02 -3.902404785156250000e+00 4.825138151645660400e-01 3.529411852359771729e-01 2.037555175781250000e+03 1.554602146148681641e+00 4.000000000000000000e+00 6.880919189453125000e+02 1.382500000000000000e+02 5.025000000000000000e+01
2.100000000000000000e+01 7.604846153846156085e+02 2.792543640136718750e+02 -3.553436279296875000e+00 1.294784247875213623e-01 2.941176593303680420e-01 2.034844482421875000e+03 1.726386070251464844e+00 3.000000000000000000e+00 4.907494506835937500e+02 1.387500000000000000e+02 5.025000000000000000e+01
1.400000000000000000e+01 7.693692307692308532e+02 3.126095886230468750e+02 -3.095245361328125000e+00 6.089280843734741211e-01 1.176470592617988586e-01 1.943825805664062500e+03 1.390817046165466309e+00 3.000000000000000000e+00 8.864255371093750000e+02 1.392500000000000000e+02 5.025000000000000000e+01
5.000000000000000000e+01 7.421076923076921048e+02 3.321429138183593750e+02 -2.637023925781250000e+00 4.000960886478424072e-01 0.000000000000000000e+00 1.852807128906250000e+03 7.731316685676574707e-01 4.000000000000000000e+00 8.686323242187500000e+02 1.397500000000000000e+02 5.025000000000000000e+01
4.100000000000000000e+01 7.142846153846154493e+02 3.493099060058593750e+02 -2.178833007812500000e+00 9.999999776482582092e-03 1.176470592617988586e-01 1.761788574218750000e+03 1.128891587257385254e+00 3.000000000000000000e+00 4.415893554687500000e+02 1.402500000000000000e+02 5.025000000000000000e+01
1.100000000000000000e+01 7.794307692307689877e+02 4.093124084472656250e+02 -3.604125976562500000e-01 0.000000000000000000e+00 5.882353186607360840e-01 1.969839477539062500e+03 9.368132948875427246e-01 3.000000000000000000e+00 1.462979736328125000e+02 1.427500000000000000e+02 5.025000000000000000e+01
2.400000000000000000e+01 8.129461538461536065e+02 4.214084777832031250e+02 -2.684631347656250000e-01 2.551532089710235596e-01 1.176470592617988586e-01 1.878045166015625000e+03 1.088621377944946289e+00 3.000000000000000000e+00 6.789521484375000000e+02 1.432500000000000000e+02 5.025000000000000000e+01
2.800000000000000000e+01 1.406115384615384301e+03 5.286075439453125000e+02 1.075949096679687500e+01 0.000000000000000000e+00 0.000000000000000000e+00 4.102900390625000000e+03 4.103898525238037109e+00 3.000000000000000000e+00 1.659732971191406250e+02 -4.250000000000000000e+00 5.075000000000000000e+01
2.400000000000000000e+01 1.478992307692307577e+03 5.216942749023437500e+02 1.062036132812500000e+01 0.000000000000000000e+00 0.000000000000000000e+00 4.067772949218750000e+03 4.073854923248291016e+00 3.000000000000000000e+00 1.503616790771484375e+02 -3.750000000000000000e+00 5.075000000000000000e+01
1.600000000000000000e+01 1.022653846153846530e+03 4.893082580566406250e+02 8.347564697265625000e+00 0.000000000000000000e+00 0.000000000000000000e+00 3.795668457031250000e+03 3.985445499420166016e+00 3.000000000000000000e+00 2.494786376953125000e+02 6.250000000000000000e+00 5.075000000000000000e+01
7.000000000000000000e+00 8.472538461538463253e+02 3.916510925292968750e+02 7.942016601562500000e+00 0.000000000000000000e+00 0.000000000000000000e+00 3.691802246093750000e+03 4.023190498352050781e+00 1.000000000000000000e+00 1.256044921875000000e+02 7.250000000000000000e+00 5.075000000000000000e+01
1.800000000000000000e+01 8.273307692307687375e+02 4.278918762207031250e+02 7.761077880859375000e+00 0.000000000000000000e+00 0.000000000000000000e+00 3.645025634765625000e+03 3.920137166976928711e+00 3.000000000000000000e+00 2.589476623535156250e+02 7.750000000000000000e+00 5.075000000000000000e+01
1.500000000000000000e+01 7.944153846153845961e+02 4.535445251464843750e+02 7.601959228515625000e+00 0.000000000000000000e+00 0.000000000000000000e+00 3.603405517578125000e+03 3.849548339843750000e+00 3.000000000000000000e+00 3.174274902343750000e+02 8.250000000000000000e+00 5.075000000000000000e+01
6.100000000000000000e+01 7.001461538461539931e+02 4.212205200195312500e+02 7.018432617187500000e+00 0.000000000000000000e+00 0.000000000000000000e+00 3.451301513671875000e+03 3.672149896621704102e+00 4.000000000000000000e+00 4.238461608886718750e+02 1.025000000000000000e+01 5.075000000000000000e+01
2.400000000000000000e+01 6.599692307692309896e+02 4.284148864746093750e+02 6.889587402343750000e+00 0.000000000000000000e+00 0.000000000000000000e+00 3.417896484375000000e+03 3.685179233551025391e+00 3.000000000000000000e+00 5.834567871093750000e+02 1.075000000000000000e+01 5.075000000000000000e+01
1.000000000000000000e+01 6.371307692307693742e+02 3.755132751464843750e+02 6.521179199218750000e+00 0.000000000000000000e+00 0.000000000000000000e+00 3.341710205078125000e+03 3.776959896087646484e+00 3.000000000000000000e+00 4.863275451660156250e+02 1.325000000000000000e+01 5.075000000000000000e+01
1.300000000000000000e+01 6.527230769230772012e+02 3.228570556640625000e+02 6.356445312500000000e+00 0.000000000000000000e+00 0.000000000000000000e+00 3.336311279296875000e+03 3.811800956726074219e+00 3.000000000000000000e+00 3.118829345703125000e+02 1.425000000000000000e+01 5.075000000000000000e+01
3.300000000000000000e+01 9.148076923076926050e+02 5.210087280273437500e+02 6.107238769531250000e+00 0.000000000000000000e+00 0.000000000000000000e+00 3.329358886718750000e+03 3.625502586364746094e+00 3.000000000000000000e+00 1.068143188476562500e+03 1.575000000000000000e+01 5.075000000000000000e+01
6.700000000000000000e+01 7.917692307692309441e+02 3.988592834472656250e+02 6.023468017578125000e+00 0.000000000000000000e+00 4.705882370471954346e-01 3.327423095703125000e+03 3.642560482025146484e+00 4.000000000000000000e+00 5.335010375976562500e+02 1.625000000000000000e+01 5.075000000000000000e+01
1.800000000000000000e+01 7.314230769230766782e+02 3.046778869628906250e+02 5.939697265625000000e+00 0.000000000000000000e+00 2.941176593303680420e-01 3.325487304687500000e+03 3.712829589843750000e+00 3.000000000000000000e+00 2.782361755371093750e+02 1.675000000000000000e+01 5.075000000000000000e+01
2.000000000000000000e+00 6.209076923076920593e+02 2.972361755371093750e+02 5.864959716796875000e+00 0.000000000000000000e+00 2.941176593303680420e-01 3.327221435546875000e+03 3.905868530273437500e+00 1.000000000000000000e+00 1.461931915283203125e+02 1.775000000000000000e+01 5.075000000000000000e+01
4.000000000000000000e+00 6.427615384615385210e+02 2.977863159179687500e+02 5.834228515625000000e+00 0.000000000000000000e+00 0.000000000000000000e+00 3.328488769531250000e+03 3.890635728836059570e+00 1.000000000000000000e+00 2.131969757080078125e+02 1.825000000000000000e+01 5.075000000000000000e+01
6.400000000000000000e+01 6.689769230769229580e+02 3.258710937500000000e+02 5.803497314453125000e+00 0.000000000000000000e+00 0.000000000000000000e+00 3.329756103515625000e+03 3.865473985671997070e+00 4.000000000000000000e+00 2.587360534667968750e+02 1.875000000000000000e+01 5.075000000000000000e+01
2.200000000000000000e+01 6.670846153846157449e+02 3.420926818847656250e+02 5.407257080078125000e+00 0.000000000000000000e+00 0.000000000000000000e+00 3.238762939453125000e+03 3.816845417022705078e+00 3.000000000000000000e+00 2.667979125976562500e+02 2.075000000000000000e+01 5.075000000000000000e+01
4.500000000000000000e+01 6.023538461538462343e+02 3.184656982421875000e+02 5.353912353515625000e+00 0.000000000000000000e+00 0.000000000000000000e+00 3.206300292968750000e+03 3.836387872695922852e+00 4.000000000000000000e+00 1.989369354248046875e+02 2.625000000000000000e+01 5.075000000000000000e+01
1.400000000000000000e+01 6.154999999999998863e+02 3.368023376464843750e+02 5.739715576171875000e+00 0.000000000000000000e+00 8.235294222831726074e-01 3.347575195312500000e+03 3.827493667602539062e+00 3.000000000000000000e+00 1.820599670410156250e+02 2.875000000000000000e+01 5.075000000000000000e+01
1.400000000000000000e+01 6.377846153846156767e+02 3.344827575683593750e+02 5.732696533203125000e+00 0.000000000000000000e+00 9.411764740943908691e-01 3.358182861328125000e+03 3.853354930877685547e+00 3.000000000000000000e+00 1.606826019287109375e+02 2.925000000000000000e+01 5.075000000000000000e+01
4.100000000000000000e+01 6.303153846153844597e+02 3.296268310546875000e+02 5.725677490234375000e+00 0.000000000000000000e+00 8.823529481887817383e-01 3.368790771484375000e+03 3.919407606124877930e+00 3.000000000000000000e+00 1.503325347900390625e+02 2.975000000000000000e+01 5.075000000000000000e+01
2.600000000000000000e+01 6.100692307692307850e+02 3.310242614746093750e+02 5.493530273437500000e+00 0.000000000000000000e+00 0.000000000000000000e+00 3.347495361328125000e+03 3.986069679260253906e+00 3.000000000000000000e+00 9.835674285888671875e+01 3.075000000000000000e+01 5.075000000000000000e+01
1.400000000000000000e+01 6.115076923076921958e+02 3.260119934082031250e+02 5.041137695312500000e+00 0.000000000000000000e+00 1.882352948188781738e+00 3.291069335937500000e+03 3.924918413162231445e+00 3.000000000000000000e+00 1.286432037353515625e+02 3.225000000000000000e+01 5.075000000000000000e+01
5.300000000000000000e+01 5.778230769230769965e+02 3.079690856933593750e+02 4.613647460937500000e+00 0.000000000000000000e+00 2.529411792755126953e+00 3.228415283203125000e+03 3.877708196640014648e+00 4.000000000000000000e+00 1.297904663085937500e+02 3.475000000000000000e+01 5.075000000000000000e+01
1.000000000000000000e+00 4.393153846153844597e+02 2.628547363281250000e+02 4.360900878906250000e+00 0.000000000000000000e+00 2.470588207244873047e+00 3.426475585937500000e+03 3.905870199203491211e+00 1.000000000000000000e+00 1.547167205810546875e+02 4.425000000000000000e+01 5.075000000000000000e+01
3.000000000000000000e+00 3.839461538461537202e+02 2.331894531250000000e+02 4.790618896484375000e+00 0.000000000000000000e+00 2.235294103622436523e+00 3.592280517578125000e+03 4.054538726806640625e+00 1.000000000000000000e+00 5.248455047607421875e+01 4.675000000000000000e+01 5.075000000000000000e+01
1.000000000000000000e+00 3.807999999999998977e+02 1.899227294921875000e+02 5.004516601562500000e+00 0.000000000000000000e+00 1.647058844566345215e+00 3.685472900390625000e+03 4.024396419525146484e+00 1.000000000000000000e+00 8.171752929687500000e+01 4.875000000000000000e+01 5.075000000000000000e+01
2.000000000000000000e+00 3.739999999999999432e+02 1.744025421142578125e+02 4.873168945312500000e+00 0.000000000000000000e+00 2.411764621734619141e+00 3.671283203125000000e+03 4.032954216003417969e+00 1.000000000000000000e+00 2.736074256896972656e+01 4.975000000000000000e+01 5.075000000000000000e+01
1.000000000000000000e+00 3.652230769230768033e+02 1.634579010009765625e+02 4.807495117187500000e+00 0.000000000000000000e+00 1.705882310867309570e+00 3.664188476562500000e+03 4.039321422576904297e+00 1.000000000000000000e+00 2.149997329711914062e+01 5.025000000000000000e+01 5.075000000000000000e+01
4.000000000000000000e+00 3.486230769230770079e+02 1.573022308349609375e+02 4.726715087890625000e+00 0.000000000000000000e+00 3.117647171020507812e+00 3.652276123046875000e+03 4.040461540222167969e+00 1.000000000000000000e+00 2.031730461120605469e+01 5.075000000000000000e+01 5.075000000000000000e+01
0.000000000000000000e+00 3.308230769230768260e+02 1.570689392089843750e+02 4.600524902343750000e+00 0.000000000000000000e+00 1.588235259056091309e+00 3.625911621093750000e+03 4.032398223876953125e+00 1.000000000000000000e+00 2.282956314086914062e+01 5.125000000000000000e+01 5.075000000000000000e+01
0.000000000000000000e+00 3.218615384615386006e+02 1.530822906494140625e+02 4.348205566406250000e+00 0.000000000000000000e+00 2.470588207244873047e+00 3.573182617187500000e+03 4.009870529174804688e+00 1.000000000000000000e+00 4.698789978027343750e+01 5.225000000000000000e+01 5.075000000000000000e+01
0.000000000000000000e+00 3.236615384615384983e+02 1.486587677001953125e+02 4.206298828125000000e+00 0.000000000000000000e+00 2.411764621734619141e+00 3.541287841796875000e+03 4.010563850402832031e+00 1.000000000000000000e+00 1.165039901733398438e+02 5.275000000000000000e+01 5.075000000000000000e+01
1.000000000000000000e+00 3.214307692307692150e+02 1.480188751220703125e+02 4.048675537109375000e+00 0.000000000000000000e+00 3.058823585510253906e+00 3.503862548828125000e+03 3.995697498321533203e+00 1.000000000000000000e+00 8.377025604248046875e+01 5.325000000000000000e+01 5.075000000000000000e+01
1.000000000000000000e+00 3.250846153846152902e+02 1.510960540771484375e+02 3.891052246093750000e+00 0.000000000000000000e+00 2.411764621734619141e+00 3.466437255859375000e+03 3.970219373703002930e+00 1.000000000000000000e+00 1.543089294433593750e+02 5.375000000000000000e+01 5.075000000000000000e+01
1.000000000000000000e+00 3.246923076923077360e+02 1.603482360839843750e+02 3.733398437500000000e+00 0.000000000000000000e+00 2.705882310867309570e+00 3.429011718750000000e+03 3.945507764816284180e+00 1.000000000000000000e+00 1.705956878662109375e+02 5.425000000000000000e+01 5.075000000000000000e+01
0.000000000000000000e+00 3.214769230769229011e+02 1.752995300292968750e+02 3.553131103515625000e+00 0.000000000000000000e+00 2.000000000000000000e+00 3.385207519531250000e+03 3.929499149322509766e+00 1.000000000000000000e+00 1.085486373901367188e+02 5.475000000000000000e+01 5.075000000000000000e+01
1.000000000000000000e+00 2.965384615384613767e+02 1.882832946777343750e+02 2.272186279296875000e+00 0.000000000000000000e+00 2.411764621734619141e+00 3.149042480468750000e+03 3.749449729919433594e+00 1.000000000000000000e+00 2.730705566406250000e+02 5.925000000000000000e+01 5.075000000000000000e+01
1.000000000000000000e+00 2.885076923076924231e+02 1.765476226806640625e+02 2.211669921875000000e+00 0.000000000000000000e+00 2.000000000000000000e+00 3.157274414062500000e+03 3.742711067199707031e+00 1.000000000000000000e+00 3.278412170410156250e+02 5.975000000000000000e+01 5.075000000000000000e+01
1.000000000000000000e+00 2.472615384615384642e+02 1.418993377685546875e+02 2.386413574218750000e+00 0.000000000000000000e+00 2.117647171020507812e+00 3.253976318359375000e+03 3.817735910415649414e+00 1.000000000000000000e+00 2.501314086914062500e+02 6.175000000000000000e+01 5.075000000000000000e+01
1.000000000000000000e+00 2.389923076923076053e+02 1.341341552734375000e+02 2.495910644531250000e+00 0.000000000000000000e+00 2.588235378265380859e+00 3.278243896484375000e+03 3.831554651260375977e+00 1.000000000000000000e+00 2.500126647949218750e+02 6.225000000000000000e+01 5.075000000000000000e+01
1.000000000000000000e+00 2.362538461538462968e+02 1.270338973999023438e+02 2.622344970703125000e+00 0.000000000000000000e+00 1.529411792755126953e+00 3.301782714843750000e+03 3.839471817016601562e+00 1.000000000000000000e+00 2.446752471923828125e+02 6.275000000000000000e+01 5.075000000000000000e+01
0.000000000000000000e+00 2.353384615384615586e+02 1.188993301391601562e+02 2.748779296875000000e+00 0.000000000000000000e+00 2.000000000000000000e+00 3.325321533203125000e+03 3.844389915466308594e+00 1.000000000000000000e+00 2.274864044189453125e+02 6.325000000000000000e+01 5.075000000000000000e+01
0.000000000000000000e+00 2.331307692307692037e+02 1.133872528076171875e+02 2.875213623046875000e+00 0.000000000000000000e+00 2.176470518112182617e+00 3.348860595703125000e+03 3.854516029357910156e+00 1.000000000000000000e+00 2.172576751708984375e+02 6.375000000000000000e+01 5.075000000000000000e+01
0.000000000000000000e+00 2.273923076923077247e+02 1.075881958007812500e+02 2.974121093750000000e+00 0.000000000000000000e+00 1.823529362678527832e+00 3.355265869140625000e+03 3.881382226943969727e+00 1.000000000000000000e+00 1.668938140869140625e+02 6.425000000000000000e+01 5.075000000000000000e+01
1.000000000000000000e+00 2.233538461538462059e+02 1.097153167724609375e+02 3.073059082031250000e+00 0.000000000000000000e+00 2.470588207244873047e+00 3.361671386718750000e+03 3.882950782775878906e+00 1.000000000000000000e+00 1.183571929931640625e+02 6.475000000000000000e+01 5.075000000000000000e+01
0.000000000000000000e+00 2.241615384615384130e+02 1.133581924438476562e+02 3.171966552734375000e+00 0.000000000000000000e+00 2.529411792755126953e+00 3.368076904296875000e+03 3.849109888076782227e+00 1.000000000000000000e+00 1.523404998779296875e+02 6.525000000000000000e+01 5.075000000000000000e+01
1.000000000000000000e+00 2.331769230769230603e+02 1.498717041015625000e+02 3.079406738281250000e+00 0.000000000000000000e+00 2.705882310867309570e+00 3.284709228515625000e+03 3.742923021316528320e+00 1.000000000000000000e+00 3.148465270996093750e+02 6.725000000000000000e+01 5.075000000000000000e+01
1.000000000000000000e+00 2.350461538461538282e+02 1.480690307617187500e+02 2.970489501953125000e+00 0.000000000000000000e+00 2.235294103622436523e+00 3.248827148437500000e+03 3.736511945724487305e+00 1.000000000000000000e+00 2.918018188476562500e+02 6.775000000000000000e+01 5.075000000000000000e+01
1.000000000000000000e+00 2.414615384615383959e+02 1.429668426513671875e+02 2.803955078125000000e+00 0.000000000000000000e+00 2.000000000000000000e+00 3.204192382812500000e+03 3.714514970779418945e+00 1.000000000000000000e+00 3.239410400390625000e+02 6.825000000000000000e+01 5.075000000000000000e+01
0.000000000000000000e+00 3.304076923076924004e+02 2.057458190917968750e+02 1.209350585937500000e+00 0.000000000000000000e+00 2.294117689132690430e+00 2.909716552734375000e+03 3.548535346984863281e+00 1.000000000000000000e+00 4.993536987304687500e+02 7.275000000000000000e+01 5.075000000000000000e+01
1.000000000000000000e+00 3.378615384615386006e+02 2.182257385253906250e+02 1.042419433593750000e+00 0.000000000000000000e+00 2.647058725357055664e+00 2.894503173828125000e+03 3.541819572448730469e+00 1.000000000000000000e+00 5.642650756835937500e+02 7.325000000000000000e+01 5.075000000000000000e+01
1.000000000000000000e+00 3.301923076923075655e+02 2.192889709472656250e+02 9.164428710937500000e-01 0.000000000000000000e+00 2.882352828979492188e+00 2.894370117187500000e+03 3.539850473403930664e+00 1.000000000000000000e+00 4.262897338867187500e+02 7.375000000000000000e+01 5.075000000000000000e+01
0.000000000000000000e+00 3.158384615384615017e+02 2.084532623291015625e+02 7.904663085937500000e-01 0.000000000000000000e+00 1.705882310867309570e+00 2.894237060546875000e+03 3.544289588928222656e+00 1.000000000000000000e+00 4.374061279296875000e+02 7.425000000000000000e+01 5.075000000000000000e+01
1.000000000000000000e+00 3.026846153846155403e+02 1.898249816894531250e+02 6.644897460937500000e-01 0.000000000000000000e+00 1.941176414489746094e+00 2.894104003906250000e+03 3.553765296936035156e+00 1.000000000000000000e+00 4.648081359863281250e+02 7.475000000000000000e+01 5.075000000000000000e+01
1.000000000000000000e+00 2.620692307692307281e+02 1.279628448486328125e+02 4.402465820312500000e-01 0.000000000000000000e+00 1.941176414489746094e+00 2.916404785156250000e+03 3.645511388778686523e+00 1.000000000000000000e+00 3.317688598632812500e+02 7.675000000000000000e+01 5.075000000000000000e+01
0.000000000000000000e+00 2.560615384615384187e+02 1.067962417602539062e+02 5.383911132812500000e-01 0.000000000000000000e+00 1.882352948188781738e+00 2.929910888671875000e+03 3.698742151260375977e+00 1.000000000000000000e+00 2.714471740722656250e+02 7.775000000000000000e+01 5.075000000000000000e+01
2.000000000000000000e+00 2.680923076923078270e+02 1.114320755004882812e+02 6.636962890625000000e-01 0.000000000000000000e+00 1.529411792755126953e+00 2.943520507812500000e+03 3.739676237106323242e+00 1.000000000000000000e+00 1.818998870849609375e+02 7.875000000000000000e+01 5.075000000000000000e+01
2.100000000000000000e+01 2.863153846153846303e+02 1.284070739746093750e+02 7.709960937500000000e-01 0.000000000000000000e+00 3.529411852359771729e-01 2.916595214843750000e+03 3.727974414825439453e+00 3.000000000000000000e+00 1.953214569091796875e+02 7.925000000000000000e+01 5.075000000000000000e+01
2.000000000000000000e+01 3.079076923076923435e+02 1.473942260742187500e+02 8.782958984375000000e-01 0.000000000000000000e+00 5.882352963089942932e-02 2.889669921875000000e+03 2.622120618820190430e+00 3.000000000000000000e+00 2.394573211669921875e+02 7.975000000000000000e+01 5.075000000000000000e+01
1.000000000000000000e+00 3.416769230769229466e+02 1.637974395751953125e+02 9.855957031250000000e-01 0.000000000000000000e+00 1.470588207244873047e+00 2.862744628906250000e+03 3.241024017333984375e+00 1.000000000000000000e+00 3.675198364257812500e+02 8.025000000000000000e+01 5.075000000000000000e+01
2.000000000000000000e+00 3.729076923076921162e+02 1.857937164306640625e+02 1.018127441406250000e+00 0.000000000000000000e+00 1.647058844566345215e+00 2.817712402343750000e+03 3.309846162796020508e+00 1.000000000000000000e+00 3.625657043457031250e+02 8.075000000000000000e+01 5.075000000000000000e+01
4.000000000000000000e+00 5.216846153846151992e+02 3.020645446777343750e+02 4.425659179687500000e-01 0.000000000000000000e+00 1.352941155433654785e+00 2.519654541015625000e+03 3.534632921218872070e+00 1.000000000000000000e+00 5.787164306640625000e+02 8.225000000000000000e+01 5.075000000000000000e+01
5.600000000000000000e+01 5.425615384615385892e+02 3.067373046875000000e+02 -3.979492187500000000e-02 0.000000000000000000e+00 0.000000000000000000e+00 2.372566894531250000e+03 8.892448544502258301e-01 4.000000000000000000e+00 6.773535766601562500e+02 8.275000000000000000e+01 5.075000000000000000e+01
6.200000000000000000e+01 5.649307692307688740e+02 3.033263549804687500e+02 -8.127441406250000000e-01 0.000000000000000000e+00 0.000000000000000000e+00 2.177744384765625000e+03 8.186109066009521484e-01 4.000000000000000000e+00 7.276517944335937500e+02 8.325000000000000000e+01 5.075000000000000000e+01
5.300000000000000000e+01 5.788769230769231626e+02 2.854798278808593750e+02 -1.585662841796875000e+00 4.080756902694702148e-01 5.882352963089942932e-02 1.982921752929687500e+03 1.226682782173156738e+00 4.000000000000000000e+00 1.275847656250000000e+03 8.375000000000000000e+01 5.075000000000000000e+01
4.400000000000000000e+01 5.890692307692307850e+02 2.544568481445312500e+02 -2.358581542968750000e+00 4.308814406394958496e-01 0.000000000000000000e+00 1.788099243164062500e+03 2.434162616729736328e+00 3.000000000000000000e+00 1.399584228515625000e+03 8.425000000000000000e+01 5.075000000000000000e+01
4.500000000000000000e+01 5.775615384615382482e+02 2.289893646240234375e+02 -3.341461181640625000e+00 1.936034113168716431e-01 3.529411852359771729e-01 1.643780883789062500e+03 2.068598508834838867e+00 4.000000000000000000e+00 1.531652954101562500e+03 8.475000000000000000e+01 5.075000000000000000e+01
2.200000000000000000e+01 5.608538461538460069e+02 2.246647796630859375e+02 -4.394287109375000000e+00 3.192706406116485596e-01 6.470588445663452148e-01 1.516297119140625000e+03 2.551162481307983398e+00 3.000000000000000000e+00 1.707022216796875000e+03 8.525000000000000000e+01 5.075000000000000000e+01
4.600000000000000000e+01 5.261153846153847553e+02 2.162722015380859375e+02 -5.447143554687500000e+00 3.847309648990631104e-01 6.470588445663452148e-01 1.388813354492187500e+03 1.461617469787597656e+00 4.000000000000000000e+00 1.465595092773437500e+03 8.575000000000000000e+01 5.075000000000000000e+01
1.400000000000000000e+01 4.968615384615385437e+02 2.134858398437500000e+02 -6.499969482421875000e+00 1.030790209770202637e-01 3.529411852359771729e-01 1.261329589843750000e+03 9.678984284400939941e-01 3.000000000000000000e+00 1.202668334960937500e+03 8.625000000000000000e+01 5.075000000000000000e+01
3.200000000000000000e+01 4.895692307692307281e+02 2.121325225830078125e+02 -7.373779296875000000e+00 6.700493693351745605e-01 2.941176593303680420e-01 1.187722045898437500e+03 9.911853075027465820e-01 3.000000000000000000e+00 1.801716674804687500e+03 8.675000000000000000e+01 5.075000000000000000e+01
5.600000000000000000e+01 4.851538461538461320e+02 1.875859985351562500e+02 -8.247589111328125000e+00 2.762475609779357910e-01 0.000000000000000000e+00 1.114114501953125000e+03 8.964365124702453613e-01 4.000000000000000000e+00 1.622554321289062500e+03 8.725000000000000000e+01 5.075000000000000000e+01
5.100000000000000000e+01 4.359923076923077474e+02 1.522767791748046875e+02 -9.121398925781250000e+00 4.314635992050170898e-01 0.000000000000000000e+00 1.040506958007812500e+03 1.613144755363464355e+00 4.000000000000000000e+00 1.503905761718750000e+03 8.775000000000000000e+01 5.075000000000000000e+01
5.600000000000000000e+01 3.975538461538463366e+02 1.385373840332031250e+02 -9.779815673828125000e+00 5.950536131858825684e-01 1.176470592617988586e-01 9.900430297851562500e+02 1.464447498321533203e+00 4.000000000000000000e+00 1.670724853515625000e+03 8.825000000000000000e+01 5.075000000000000000e+01
3.400000000000000000e+01 3.072461538461539021e+02 9.582089996337890625e+01 -9.307708740234375000e+00 8.464636802673339844e-01 1.176470637321472168e+00 1.106284667968750000e+03 2.240710496902465820e+00 3.000000000000000000e+00 1.615994506835937500e+03 9.025000000000000000e+01 5.075000000000000000e+01
4.100000000000000000e+01 3.709615384615386802e+02 9.066895294189453125e+01 -7.246490478515625000e+00 5.625050663948059082e-01 7.647058963775634766e-01 1.305715332031250000e+03 2.386757373809814453e+00 3.000000000000000000e+00 1.755551513671875000e+03 9.125000000000000000e+01 5.075000000000000000e+01
6.000000000000000000e+00 4.177846153846153925e+02 9.145372009277343750e+01 -6.215881347656250000e+00 5.108225345611572266e-01 3.529411852359771729e-01 1.405430664062500000e+03 2.415667772293090820e+00 1.000000000000000000e+00 1.705265014648437500e+03 9.175000000000000000e+01 5.075000000000000000e+01
2.600000000000000000e+01 3.732923076923074177e+02 8.064241790771484375e+01 -3.008422851562500000e+00 2.107853144407272339e-01 1.000000000000000000e+00 1.690610839843750000e+03 1.873390793800354004e+00 3.000000000000000000e+00 1.404869018554687500e+03 9.525000000000000000e+01 5.075000000000000000e+01
2.400000000000000000e+01 3.835846153846154039e+02 7.950642395019531250e+01 -3.196441650390625000e+00 2.694167196750640869e-01 1.705882310867309570e+00 1.660576904296875000e+03 1.882137894630432129e+00 3.000000000000000000e+00 1.344454467773437500e+03 9.575000000000000000e+01 5.075000000000000000e+01
5.500000000000000000e+01 3.938769230769229921e+02 8.203283691406250000e+01 -5.036315917968750000e+00 6.494212150573730469e-01 5.882353186607360840e-01 1.469070922851562500e+03 1.605771064758300781e+00 4.000000000000000000e+00 1.797725952148437500e+03 9.675000000000000000e+01 5.075000000000000000e+01
6.300000000000000000e+01 3.729461538461539476e+02 8.947223663330078125e+01 -5.956237792968750000e+00 5.748520493507385254e-01 5.294117927551269531e-01 1.373317993164062500e+03 1.476877450942993164e+00 4.000000000000000000e+00 1.556240722656250000e+03 9.725000000000000000e+01 5.075000000000000000e+01
1.200000000000000000e+01 3.689615384615383959e+02 1.081772613525390625e+02 -6.797729492187500000e+00 3.332208096981048584e-01 1.117647051811218262e+00 1.303540649414062500e+03 1.404220461845397949e+00 3.000000000000000000e+00 1.356571655273437500e+03 9.775000000000000000e+01 5.075000000000000000e+01
2.000000000000000000e+00 3.617384615384616495e+02 1.309499664306640625e+02 -9.086944580078125000e+00 5.325277447700500488e-01 3.529411852359771729e-01 1.172135986328125000e+03 2.200160026550292969e+00 1.000000000000000000e+00 1.646920410156250000e+03 9.925000000000000000e+01 5.075000000000000000e+01
3.200000000000000000e+01 4.308923076923076678e+02 1.303128356933593750e+02 -8.102844238281250000e+00 6.371715068817138672e-01 1.176470592617988586e-01 1.341405029296875000e+03 1.943864107131958008e+00 3.000000000000000000e+00 1.740876586914062500e+03 1.012500000000000000e+02 5.075000000000000000e+01
3.000000000000000000e+01 4.846384615384616268e+02 1.356322021484375000e+02 -7.235321044921875000e+00 4.527752995491027832e-01 1.000000000000000000e+00 1.450349853515625000e+03 1.471866130828857422e+00 3.000000000000000000e+00 1.693974731445312500e+03 1.017500000000000000e+02 5.075000000000000000e+01
2.200000000000000000e+01 6.063846153846154721e+02 1.485641479492187500e+02 -6.367797851562500000e+00 5.277315378189086914e-01 4.117647111415863037e-01 1.559294677734375000e+03 2.592703342437744141e+00 3.000000000000000000e+00 1.558683349609375000e+03 1.022500000000000000e+02 5.075000000000000000e+01
3.000000000000000000e+01 6.935846153846155175e+02 1.820421752929687500e+02 -5.500244140625000000e+00 1.737658381462097168e-01 7.647058963775634766e-01 1.668239624023437500e+03 1.773486018180847168e+00 3.000000000000000000e+00 1.256008056640625000e+03 1.027500000000000000e+02 5.075000000000000000e+01
3.200000000000000000e+01 7.572153846153845507e+02 2.104272613525390625e+02 -4.692749023437500000e+00 3.494777381420135498e-01 5.882352963089942932e-02 1.770608276367187500e+03 1.429723143577575684e+00 3.000000000000000000e+00 1.433500854492187500e+03 1.032500000000000000e+02 5.075000000000000000e+01
3.100000000000000000e+01 7.426615384615383846e+02 2.206188964843750000e+02 -4.065277099609375000e+00 2.759564220905303955e-01 1.411764740943908691e+00 1.853248413085937500e+03 1.455855488777160645e+00 3.000000000000000000e+00 1.170563720703125000e+03 1.037500000000000000e+02 5.075000000000000000e+01
3.900000000000000000e+01 6.715461538461536293e+02 1.953856048583984375e+02 -2.810363769531250000e+00 2.390436381101608276e-01 1.294117689132690430e+00 2.018528686523437500e+03 1.157698631286621094e+00 3.000000000000000000e+00 1.166395263671875000e+03 1.047500000000000000e+02 5.075000000000000000e+01
1.000000000000000000e+01 5.829153846153847098e+02 1.758954315185546875e+02 -2.530944824218750000e+00 1.219272017478942871e-01 1.882352948188781738e+00 2.058245605468750000e+03 2.462292194366455078e+00 3.000000000000000000e+00 9.789197998046875000e+02 1.052500000000000000e+02 5.075000000000000000e+01
4.000000000000000000e+00 4.125923076923075996e+02 1.303024444580078125e+02 -2.668273925781250000e+00 0.000000000000000000e+00 2.058823585510253906e+00 2.051833496093750000e+03 3.248633861541748047e+00 1.000000000000000000e+00 6.221490478515625000e+02 1.062500000000000000e+02 5.075000000000000000e+01
1.500000000000000000e+01 3.845846153846152902e+02 1.171777725219726562e+02 -2.736938476562500000e+00 0.000000000000000000e+00 2.588235378265380859e+00 2.048627441406250000e+03 2.314790010452270508e+00 3.000000000000000000e+00 6.724612426757812500e+02 1.067500000000000000e+02 5.075000000000000000e+01
5.000000000000000000e+01 3.687692307692307736e+02 1.262026519775390625e+02 -3.185699462890625000e+00 9.999999776482582092e-03 1.705882310867309570e+00 2.011151977539062500e+03 1.886474728584289551e+00 4.000000000000000000e+00 9.177760620117187500e+02 1.072500000000000000e+02 5.075000000000000000e+01
1.100000000000000000e+01 3.803769230769230489e+02 1.507579345703125000e+02 -4.336639404296875000e+00 9.999999776482582092e-03 2.000000000000000000e+00 1.913354736328125000e+03 1.856803894042968750e+00 3.000000000000000000e+00 7.710650634765625000e+02 1.082500000000000000e+02 5.075000000000000000e+01
2.100000000000000000e+01 3.847307692307691696e+02 1.556751708984375000e+02 -4.912109375000000000e+00 1.498146951198577881e-01 2.117647171020507812e+00 1.864456176757812500e+03 1.058753252029418945e+00 3.000000000000000000e+00 1.023711120605468750e+03 1.087500000000000000e+02 5.075000000000000000e+01
6.300000000000000000e+01 4.042846153846154493e+02 1.588434753417968750e+02 -5.207855224609375000e+00 3.512907028198242188e-01 7.058823704719543457e-01 1.862495239257812500e+03 7.741079330444335938e-01 4.000000000000000000e+00 9.766940307617187500e+02 1.092500000000000000e+02 5.075000000000000000e+01
5.600000000000000000e+01 4.094153846153846530e+02 1.584742736816406250e+02 -5.503601074218750000e+00 4.941626787185668945e-01 5.882353186607360840e-01 1.860534423828125000e+03 7.602692842483520508e-01 4.000000000000000000e+00 1.333476684570312500e+03 1.097500000000000000e+02 5.075000000000000000e+01
5.600000000000000000e+01 4.003230769230767692e+02 1.588834381103515625e+02 -5.799377441406250000e+00 6.023047566413879395e-01 1.647058844566345215e+00 1.858573608398437500e+03 7.498826980590820312e-01 4.000000000000000000e+00 1.382190429687500000e+03 1.102500000000000000e+02 5.075000000000000000e+01
5.500000000000000000e+01 3.996461538461537657e+02 1.588088226318359375e+02 -5.950073242187500000e+00 4.174956083297729492e-01 1.823529362678527832e+00 1.873324584960937500e+03 9.823389649391174316e-01 4.000000000000000000e+00 1.214022094726562500e+03 1.107500000000000000e+02 5.075000000000000000e+01
5.400000000000000000e+01 3.758076923076920366e+02 1.533008880615234375e+02 -5.665710449218750000e+00 2.206518203020095825e-01 5.882353186607360840e-01 1.938210815429687500e+03 8.383951783180236816e-01 4.000000000000000000e+00 1.046741210937500000e+03 1.112500000000000000e+02 5.075000000000000000e+01
2.300000000000000000e+01 3.517076923076923549e+02 1.422865753173828125e+02 -5.381347656250000000e+00 4.041356444358825684e-01 4.117647111415863037e-01 2.003097167968750000e+03 8.749390244483947754e-01 3.000000000000000000e+00 1.313973144531250000e+03 1.117500000000000000e+02 5.075000000000000000e+01
6.500000000000000000e+01 3.517692307692308304e+02 1.346206054687500000e+02 -5.096984863281250000e+00 4.583927094936370850e-01 2.941176593303680420e-01 2.067983398437500000e+03 1.827948570251464844e+00 4.000000000000000000e+00 1.282486328125000000e+03 1.122500000000000000e+02 5.075000000000000000e+01
5.700000000000000000e+01 3.376615384615383277e+02 1.328625335693359375e+02 -4.683624267578125000e+00 4.587057828903198242e-01 1.117647051811218262e+00 2.151110839843750000e+03 1.883376002311706543e+00 4.000000000000000000e+00 1.288969116210937500e+03 1.127500000000000000e+02 5.075000000000000000e+01
1.100000000000000000e+01 3.209230769230770193e+02 1.314629516601562500e+02 -4.141265869140625000e+00 1.547616422176361084e-01 1.705882310867309570e+00 2.252479492187500000e+03 2.237503767013549805e+00 3.000000000000000000e+00 9.748952026367187500e+02 1.132500000000000000e+02 5.075000000000000000e+01
4.000000000000000000e+00 2.894769230769229011e+02 1.244170532226562500e+02 -2.345062255859375000e+00 9.999999776482582092e-03 1.588235259056091309e+00 2.592440185546875000e+03 2.910192966461181641e+00 1.000000000000000000e+00 6.590015869140625000e+02 1.157500000000000000e+02 5.075000000000000000e+01
1.300000000000000000e+01 3.086692307692306940e+02 1.520849456787109375e+02 -2.631164550781250000e+00 2.490526288747787476e-01 1.764705896377563477e+00 2.567945556640625000e+03 1.591651916503906250e+00 3.000000000000000000e+00 8.758236694335937500e+02 1.172500000000000000e+02 5.075000000000000000e+01
1.800000000000000000e+01 3.187307692307692264e+02 1.635206756591796875e+02 -2.878936767578125000e+00 3.895065784454345703e-01 1.705882310867309570e+00 2.535356201171875000e+03 1.581416130065917969e+00 3.000000000000000000e+00 9.800322875976562500e+02 1.177500000000000000e+02 5.075000000000000000e+01
4.900000000000000000e+01 3.655230769230769283e+02 1.647061767578125000e+02 -4.464172363281250000e+00 3.135133683681488037e-01 1.352941155433654785e+00 2.354748046875000000e+03 1.153082489967346191e+00 4.000000000000000000e+00 8.447094726562500000e+02 1.197500000000000000e+02 5.075000000000000000e+01
4.800000000000000000e+01 3.881692307692304666e+02 1.742246093750000000e+02 -4.704315185546875000e+00 3.134486377239227295e-01 2.941176593303680420e-01 2.327797119140625000e+03 1.142310857772827148e+00 4.000000000000000000e+00 7.642426147460937500e+02 1.202500000000000000e+02 5.075000000000000000e+01
2.300000000000000000e+01 4.088615384615382595e+02 1.856203308105468750e+02 -4.754028320312500000e+00 3.391690552234649658e-01 0.000000000000000000e+00 2.321946533203125000e+03 7.489803433418273926e-01 3.000000000000000000e+00 7.522435913085937500e+02 1.207500000000000000e+02 5.075000000000000000e+01
6.000000000000000000e+01 4.264692307692305917e+02 1.918995361328125000e+02 -4.803710937500000000e+00 4.834063947200775146e-01 0.000000000000000000e+00 2.316095703125000000e+03 1.161032915115356445e+00 4.000000000000000000e+00 9.083332519531250000e+02 1.212500000000000000e+02 5.075000000000000000e+01
5.300000000000000000e+01 4.562769230769231967e+02 1.944167633056640625e+02 -4.853393554687500000e+00 5.678046941757202148e-01 0.000000000000000000e+00 2.310244873046875000e+03 1.334931135177612305e+00 4.000000000000000000e+00 9.415878295898437500e+02 1.217500000000000000e+02 5.075000000000000000e+01
5.500000000000000000e+01 4.650615384615384755e+02 1.964665374755859375e+02 -4.640411376953125000e+00 6.503007411956787109e-01 2.352941185235977173e-01 2.339294921875000000e+03 1.118125796318054199e+00 4.000000000000000000e+00 1.001637939453125000e+03 1.222500000000000000e+02 5.075000000000000000e+01
5.400000000000000000e+01 4.751461538461538794e+02 2.012409667968750000e+02 -4.339874267578125000e+00 5.302198529243469238e-01 0.000000000000000000e+00 2.379978271484375000e+03 7.332308888435363770e-01 4.000000000000000000e+00 9.306531982421875000e+02 1.227500000000000000e+02 5.075000000000000000e+01
3.900000000000000000e+01 4.778461538461541522e+02 2.095638275146484375e+02 -4.039337158203125000e+00 4.225089848041534424e-01 0.000000000000000000e+00 2.420661865234375000e+03 7.556166052818298340e-01 3.000000000000000000e+00 8.322778320312500000e+02 1.232500000000000000e+02 5.075000000000000000e+01
5.200000000000000000e+01 4.835846153846154039e+02 2.093107604980468750e+02 -3.738769531250000000e+00 3.519141077995300293e-01 5.882353186607360840e-01 2.461345458984375000e+03 7.750975489616394043e-01 4.000000000000000000e+00 6.095007934570312500e+02 1.237500000000000000e+02 5.075000000000000000e+01
4.700000000000000000e+01 4.787692307692308304e+02 2.012621917724609375e+02 -3.399902343750000000e+00 1.833900213241577148e-01 5.882352963089942932e-02 2.504207031250000000e+03 8.666948676109313965e-01 4.000000000000000000e+00 4.796396179199218750e+02 1.242500000000000000e+02 5.075000000000000000e+01
2.400000000000000000e+01 4.740923076923074859e+02 1.985778198242187500e+02 -3.061035156250000000e+00 1.778890192508697510e-01 0.000000000000000000e+00 2.547068603515625000e+03 1.049042344093322754e+00 3.000000000000000000e+00 4.676260070800781250e+02 1.247500000000000000e+02 5.075000000000000000e+01
4.100000000000000000e+01 4.651923076923076792e+02 2.108700103759765625e+02 -2.446563720703125000e+00 9.999999776482582092e-03 1.882352948188781738e+00 2.622735595703125000e+03 8.700546622276306152e-01 3.000000000000000000e+00 3.668355102539062500e+02 1.257500000000000000e+02 5.075000000000000000e+01
2.600000000000000000e+01 4.943615384615386006e+02 2.200443572998046875e+02 -2.360809326171875000e+00 1.342068612575531006e-01 2.117647171020507812e+00 2.625372802734375000e+03 8.439543843269348145e-01 3.000000000000000000e+00 4.588038635253906250e+02 1.262500000000000000e+02 5.075000000000000000e+01
2.500000000000000000e+01 5.006538461538462457e+02 2.273418273925781250e+02 -2.275054931640625000e+00 1.195897981524467468e-01 1.470588207244873047e+00 2.628010009765625000e+03 8.578090667724609375e-01 3.000000000000000000e+00 4.104921875000000000e+02 1.267500000000000000e+02 5.075000000000000000e+01
5.800000000000000000e+01 5.449461538461539476e+02 2.276130371093750000e+02 -2.292114257812500000e+00 0.000000000000000000e+00 2.058823585510253906e+00 2.610902832031250000e+03 1.382826685905456543e+00 4.000000000000000000e+00 1.371932067871093750e+02 1.277500000000000000e+02 5.075000000000000000e+01
1.800000000000000000e+01 5.721923076923076223e+02 2.242283935546875000e+02 -2.583496093750000000e+00 9.999999776482582092e-03 2.823529481887817383e+00 2.568777343750000000e+03 1.819096803665161133e+00 3.000000000000000000e+00 1.756461486816406250e+02 1.282500000000000000e+02 5.075000000000000000e+01
7.000000000000000000e+00 6.031769230769227761e+02 2.303797607421875000e+02 -2.874877929687500000e+00 9.999999776482582092e-03 2.705882310867309570e+00 2.526651611328125000e+03 1.806198835372924805e+00 1.000000000000000000e+00 2.071368713378906250e+02 1.287500000000000000e+02 5.075000000000000000e+01
4.300000000000000000e+01 6.155000000000001137e+02 2.376683654785156250e+02 -3.166259765625000000e+00 9.999999776482582092e-03 2.823529481887817383e+00 2.484525878906250000e+03 1.785250186920166016e+00 3.000000000000000000e+00 2.237992401123046875e+02 1.292500000000000000e+02 5.075000000000000000e+01
3.000000000000000000e+01 6.023923076923078952e+02 2.329446716308593750e+02 -3.527160644531250000e+00 9.999999776482582092e-03 1.764705896377563477e+00 2.426823730468750000e+03 1.841675519943237305e+00 3.000000000000000000e+00 2.284121856689453125e+02 1.297500000000000000e+02 5.075000000000000000e+01
1.800000000000000000e+01 6.093538461538462343e+02 2.299266967773437500e+02 -3.911224365234375000e+00 1.247612684965133667e-01 1.352941155433654785e+00 2.363929443359375000e+03 1.745288729667663574e+00 3.000000000000000000e+00 2.823172607421875000e+02 1.302500000000000000e+02 5.075000000000000000e+01
3.500000000000000000e+01 6.327769230769231399e+02 2.313813018798828125e+02 -4.295318603515625000e+00 3.275998830795288086e-01 6.470588445663452148e-01 2.301035156250000000e+03 8.292938470840454102e-01 3.000000000000000000e+00 7.642727050781250000e+02 1.307500000000000000e+02 5.075000000000000000e+01
6.900000000000000000e+01 6.357153846153845507e+02 2.315944061279296875e+02 -4.679382324218750000e+00 5.914037823677062988e-01 9.411764740943908691e-01 2.238140625000000000e+03 8.142085671424865723e-01 4.000000000000000000e+00 7.676093750000000000e+02 1.312500000000000000e+02 5.075000000000000000e+01
6.000000000000000000e+01 6.445230769230767010e+02 2.312066497802734375e+02 -4.947845458984375000e+00 3.920899629592895508e-01 9.411764740943908691e-01 2.193812011718750000e+03 8.222162723541259766e-01 4.000000000000000000e+00 6.525900268554687500e+02 1.317500000000000000e+02 5.075000000000000000e+01
4.200000000000000000e+01 6.552384615384614790e+02 2.299708709716796875e+02 -5.216308593750000000e+00 1.611195504665374756e-01 1.058823585510253906e+00 2.149483398437500000e+03 8.242177963256835938e-01 3.000000000000000000e+00 3.464712524414062500e+02 1.322500000000000000e+02 5.075000000000000000e+01
6.200000000000000000e+01 6.613846153846156994e+02 2.486380920410156250e+02 -5.484771728515625000e+00 4.142257273197174072e-01 1.352941155433654785e+00 2.105155029296875000e+03 8.623211383819580078e-01 4.000000000000000000e+00 6.952625122070312500e+02 1.327500000000000000e+02 5.075000000000000000e+01
5.200000000000000000e+01 6.790846153846151765e+02 2.734784545898437500e+02 -5.717224121093750000e+00 6.045342683792114258e-01 1.058823585510253906e+00 2.062358886718750000e+03 7.665072083473205566e-01 4.000000000000000000e+00 8.137489624023437500e+02 1.332500000000000000e+02 5.075000000000000000e+01
1.600000000000000000e+01 6.811461538461536520e+02 2.894382324218750000e+02 -5.841644287109375000e+00 4.073457717895507812e-01 2.941176593303680420e-01 2.024159912109375000e+03 7.612159252166748047e-01 3.000000000000000000e+00 7.985698852539062500e+02 1.337500000000000000e+02 5.075000000000000000e+01
5.200000000000000000e+01 6.793846153846156994e+02 2.931211547851562500e+02 -5.966064453125000000e+00 3.887639045715332031e-01 5.882352963089942932e-02 1.985961181640625000e+03 9.691312313079833984e-01 4.000000000000000000e+00 6.500584716796875000e+02 1.342500000000000000e+02 5.075000000000000000e+01
4.700000000000000000e+01 6.873615384615384301e+02 2.841932983398437500e+02 -6.090515136718750000e+00 9.275892972946166992e-01 5.882353186607360840e-01 1.947762329101562500e+03 1.926741003990173340e+00 4.000000000000000000e+00 1.304722045898437500e+03 1.347500000000000000e+02 5.075000000000000000e+01
2.600000000000000000e+01 6.680384615384615472e+02 2.715869750976562500e+02 -6.026489257812500000e+00 7.427182197570800781e-01 2.941176593303680420e-01 1.938982666015625000e+03 1.755904316902160645e+00 3.000000000000000000e+00 1.112381469726562500e+03 1.352500000000000000e+02 5.075000000000000000e+01
5.300000000000000000e+01 6.334923076923076906e+02 2.575877990722656250e+02 -5.774078369140625000e+00 2.637450397014617920e-01 5.882353186607360840e-01 1.959622070312500000e+03 1.588525056838989258e+00 4.000000000000000000e+00 5.005629577636718750e+02 1.357500000000000000e+02 5.075000000000000000e+01
4.700000000000000000e+01 6.365615384615382482e+02 2.352333374023437500e+02 -5.521636962890625000e+00 6.040239334106445312e-01 2.941176593303680420e-01 1.980261596679687500e+03 1.525317311286926270e+00 4.000000000000000000e+00 8.076112060546875000e+02 1.362500000000000000e+02 5.075000000000000000e+01
2.100000000000000000e+01 6.179076923076922867e+02 2.109690856933593750e+02 -5.269195556640625000e+00 1.689414978027343750e-01 1.176470592617988586e-01 2.000901000976562500e+03 2.001602172851562500e+00 3.000000000000000000e+00 2.345931243896484375e+02 1.367500000000000000e+02 5.075000000000000000e+01
[truncated: 2,420,422 more chars]
