# Supplementary material for: Environmental Conditions for Alternative Tree Cover States in HighLatitudes
Source: Copernicus journal article supplement (doi:10.5194/bg-2016-401), 2016-10-11
Supplement: Supplementary file 4 [file bg-2016-401-supplement.zip › Analysis/files_to_load_and_import/boreal_subsample_na.txt]

0.000000000000000000e+00 5.553846153846154010e+01 7.714389038085937500e+01 -1.376705932617187500e+01 9.875879883766174316e-01 0.000000000000000000e+00 7.442924194335937500e+02 1.000000000000000000e+00 1.495236358642578125e+02
4.900000000000000000e+01 7.268846153846153584e+02 3.765271301269531250e+02 2.952056884765625000e+00 0.000000000000000000e+00 0.000000000000000000e+00 3.080412841796875000e+03 4.000000000000000000e+00 2.957704467773437500e+02
4.000000000000000000e+00 4.586000000000002501e+02 2.728059082031250000e+02 -4.326934814453125000e+00 2.060598731040954590e-01 0.000000000000000000e+00 1.343183471679687500e+03 1.000000000000000000e+00 3.090670776367187500e+02
0.000000000000000000e+00 1.890230769230769283e+02 1.471990509033203125e+02 -1.045062255859375000e+01 9.923954606056213379e-01 0.000000000000000000e+00 8.208939208984375000e+02 1.000000000000000000e+00 5.214064331054687500e+02
4.000000000000000000e+00 1.989076923076923151e+02 1.320127563476562500e+02 -9.559051513671875000e+00 9.728068113327026367e-01 0.000000000000000000e+00 1.065105957031250000e+03 1.000000000000000000e+00 2.830636901855468750e+02
0.000000000000000000e+00 1.884230769230769340e+02 1.313530120849609375e+02 -1.242111206054687500e+01 9.745795130729675293e-01 0.000000000000000000e+00 7.984270629882812500e+02 1.000000000000000000e+00 1.416487731933593750e+02
3.700000000000000000e+01 4.227615384615384073e+02 2.376499176025390625e+02 -1.814666748046875000e+00 0.000000000000000000e+00 7.058823704719543457e-01 1.239271728515625000e+03 3.000000000000000000e+00 1.142759277343750000e+03
6.100000000000000000e+01 8.028076923076916955e+02 3.388968200683593750e+02 -1.645690917968750000e+00 0.000000000000000000e+00 4.705882370471954346e-01 1.345776733398437500e+03 4.000000000000000000e+00 8.211953735351562500e+02
1.000000000000000000e+00 4.134769230769231285e+02 1.251451721191406250e+02 -1.085787963867187500e+01 8.180699348449707031e-01 0.000000000000000000e+00 6.129829788208007812e+01 1.000000000000000000e+00 4.809039611816406250e+02
0.000000000000000000e+00 1.486692307692307793e+02 1.059408569335937500e+02 -1.017492675781250000e+01 9.880555868148803711e-01 0.000000000000000000e+00 9.489018554687500000e+02 1.000000000000000000e+00 2.193097381591796875e+02
4.600000000000000000e+01 1.562700000000000500e+03 5.993850097656250000e+02 5.507263183593750000e+00 0.000000000000000000e+00 0.000000000000000000e+00 2.336992187500000000e+03 4.000000000000000000e+00 7.614732360839843750e+01
0.000000000000000000e+00 4.733615384615383732e+02 1.519984130859375000e+02 -8.671508789062500000e+00 9.724420905113220215e-01 0.000000000000000000e+00 3.210997619628906250e+02 1.000000000000000000e+00 1.476760559082031250e+02
0.000000000000000000e+00 1.925692307692307850e+02 1.241862182617187500e+02 -9.557647705078125000e+00 9.742631912231445312e-01 0.000000000000000000e+00 1.109948364257812500e+03 1.000000000000000000e+00 3.397850952148437500e+02
3.300000000000000000e+01 3.039384615384614676e+02 1.392420654296875000e+02 -6.244781494140625000e+00 6.025991439819335938e-01 0.000000000000000000e+00 1.308819213867187500e+03 3.000000000000000000e+00 3.005466613769531250e+02
1.000000000000000000e+00 4.599384615384615245e+02 2.095890197753906250e+02 -1.016668701171875000e+01 9.953714013099670410e-01 0.000000000000000000e+00 4.577751464843750000e+02 1.000000000000000000e+00 6.126188354492187500e+02
4.000000000000000000e+00 3.041769230769230035e+02 2.045947418212890625e+02 -1.011291503906250000e+01 9.625283479690551758e-01 0.000000000000000000e+00 1.008441894531250000e+03 1.000000000000000000e+00 3.089704895019531250e+02
6.100000000000000000e+01 1.085699999999999818e+03 4.898060607910156250e+02 -6.900634765625000000e-01 0.000000000000000000e+00 0.000000000000000000e+00 2.113907470703125000e+03 4.000000000000000000e+00 3.328840026855468750e+02
0.000000000000000000e+00 2.391307692307692037e+02 1.681922302246093750e+02 -1.220254516601562500e+01 9.963892698287963867e-01 0.000000000000000000e+00 9.096078491210937500e+02 1.000000000000000000e+00 1.570265045166015625e+02
6.200000000000000000e+01 5.126615384615386120e+02 2.979802246093750000e+02 -1.408172607421875000e+00 9.999999776482582092e-03 5.882353186607360840e-01 1.345955200195312500e+03 4.000000000000000000e+00 1.295022827148437500e+03
1.000000000000000000e+00 1.990384615384615756e+02 1.165983810424804688e+02 -9.794281005859375000e+00 9.704680442810058594e-01 0.000000000000000000e+00 1.070874633789062500e+03 1.000000000000000000e+00 3.240849304199218750e+02
5.000000000000000000e+00 5.174461538461538339e+02 2.161919097900390625e+02 -8.758087158203125000e+00 8.894676566123962402e-01 0.000000000000000000e+00 7.492512207031250000e+02 1.000000000000000000e+00 1.711533203125000000e+02
4.000000000000000000e+00 2.450999999999999659e+02 1.704571990966796875e+02 -1.135531616210937500e+01 9.894503355026245117e-01 0.000000000000000000e+00 9.072813720703125000e+02 1.000000000000000000e+00 3.066163024902343750e+02
4.800000000000000000e+01 8.733076923076921503e+02 4.935500793457031250e+02 -1.402832031250000000e+00 9.999999776482582092e-03 5.882353186607360840e-01 2.056397460937500000e+03 4.000000000000000000e+00 3.909648437500000000e+02
4.600000000000000000e+01 3.498153846153846871e+02 1.735457763671875000e+02 -5.815063476562500000e+00 4.238491952419281006e-01 0.000000000000000000e+00 1.354073852539062500e+03 4.000000000000000000e+00 8.531764984130859375e+01
6.000000000000000000e+00 4.483153846153846871e+02 3.859625549316406250e+02 -5.336425781250000000e+00 2.891382575035095215e-01 2.352941185235977173e-01 7.911141357421875000e+02 1.000000000000000000e+00 1.399589965820312500e+03
1.900000000000000000e+01 4.658230769230771102e+02 2.443585662841796875e+02 -5.957092285156250000e+00 2.265488356351852417e-01 0.000000000000000000e+00 1.181794921875000000e+03 2.000000000000000000e+00 2.629197387695312500e+02
0.000000000000000000e+00 1.149307692307692577e+02 1.919766845703125000e+02 -1.410830688476562500e+01 9.992768168449401855e-01 0.000000000000000000e+00 7.007512207031250000e+02 1.000000000000000000e+00 1.449388275146484375e+02
6.600000000000000000e+01 1.434707692307692696e+03 6.632219848632812500e+02 4.288024902343750000e+00 0.000000000000000000e+00 0.000000000000000000e+00 2.622869628906250000e+03 4.000000000000000000e+00 1.260719970703125000e+03
4.500000000000000000e+01 7.990461538461538566e+02 3.642040405273437500e+02 4.205078125000000000e+00 0.000000000000000000e+00 0.000000000000000000e+00 3.136117431640625000e+03 4.000000000000000000e+00 4.685121459960937500e+02
7.000000000000000000e+00 5.837230769230769738e+02 3.513133544921875000e+02 -8.056915283203125000e+00 8.608537912368774414e-01 0.000000000000000000e+00 1.042174682617187500e+03 1.000000000000000000e+00 1.563141632080078125e+02
5.300000000000000000e+01 5.034538461538464844e+02 3.161266784667968750e+02 -4.217132568359375000e+00 9.999999776482582092e-03 0.000000000000000000e+00 1.084314086914062500e+03 4.000000000000000000e+00 1.202893798828125000e+03
5.300000000000000000e+01 1.354846153846153527e+02 1.700339050292968750e+02 -7.468322753906250000e+00 6.315557956695556641e-01 0.000000000000000000e+00 1.217224243164062500e+03 4.000000000000000000e+00 5.646232910156250000e+02
2.800000000000000000e+01 5.321923076923077360e+02 2.863427429199218750e+02 -5.956634521484375000e+00 4.968657493591308594e-01 5.882353186607360840e-01 1.665608764648437500e+03 3.000000000000000000e+00 2.867112121582031250e+02
4.700000000000000000e+01 8.707461538461537884e+02 4.408283691406250000e+02 -2.299407958984375000e+00 9.999999776482582092e-03 9.411764740943908691e-01 1.869687377929687500e+03 4.000000000000000000e+00 3.992044067382812500e+02
0.000000000000000000e+00 1.600230769230768999e+02 2.214295349121093750e+02 -1.411993408203125000e+01 9.991216063499450684e-01 0.000000000000000000e+00 4.946195068359375000e+02 1.000000000000000000e+00 1.190843124389648438e+02
7.400000000000000000e+01 1.066176923076922776e+03 4.996466064453125000e+02 -1.725036621093750000e+00 1.824311912059783936e-01 0.000000000000000000e+00 1.712161499023437500e+03 4.000000000000000000e+00 4.649745178222656250e+02
5.700000000000000000e+01 5.377384615384611379e+02 2.184209899902343750e+02 -5.738830566406250000e-01 0.000000000000000000e+00 0.000000000000000000e+00 1.751710083007812500e+03 4.000000000000000000e+00 7.382199096679687500e+02
0.000000000000000000e+00 2.002769230769231115e+02 1.120000076293945312e+02 -1.296176147460937500e+01 9.988936781883239746e-01 0.000000000000000000e+00 8.004865112304687500e+02 1.000000000000000000e+00 2.204915924072265625e+02
0.000000000000000000e+00 2.332461538461538737e+02 1.592122039794921875e+02 -1.210977172851562500e+01 9.955001473426818848e-01 0.000000000000000000e+00 8.699281616210937500e+02 1.000000000000000000e+00 1.412417449951171875e+02
1.500000000000000000e+01 3.341923076923076792e+02 2.279950256347656250e+02 -9.949554443359375000e+00 9.591773152351379395e-01 0.000000000000000000e+00 1.091099487304687500e+03 2.000000000000000000e+00 1.906483459472656250e+02
4.700000000000000000e+01 1.034923076923076763e+02 1.370814208984375000e+02 -9.642395019531250000e+00 7.953063249588012695e-01 4.705882370471954346e-01 1.179858154296875000e+03 4.000000000000000000e+00 3.912866821289062500e+02
7.000000000000000000e+01 1.007123076923077178e+03 5.121181640625000000e+02 8.493041992187500000e-01 0.000000000000000000e+00 0.000000000000000000e+00 2.435991455078125000e+03 4.000000000000000000e+00 4.071577148437500000e+02
0.000000000000000000e+00 2.542230769230769738e+02 1.646122436523437500e+02 -1.131878662109375000e+01 9.896874427795410156e-01 0.000000000000000000e+00 9.094287719726562500e+02 1.000000000000000000e+00 2.849338684082031250e+02
8.000000000000000000e+00 2.236307692307692037e+02 1.963742218017578125e+02 -9.282501220703125000e+00 8.167487382888793945e-01 0.000000000000000000e+00 9.418721313476562500e+02 1.000000000000000000e+00 4.219607162475585938e+01
1.000000000000000000e+01 5.257769230769231399e+02 2.889691162109375000e+02 -2.710205078125000000e+00 9.999999776482582092e-03 0.000000000000000000e+00 1.445147216796875000e+03 2.000000000000000000e+00 1.599540710449218750e+01
6.000000000000000000e+01 1.824230769230769056e+03 5.665700683593750000e+02 8.202392578125000000e+00 0.000000000000000000e+00 0.000000000000000000e+00 3.121462646484375000e+03 4.000000000000000000e+00 3.703970336914062500e+02
4.800000000000000000e+01 3.130461538461539703e+02 1.680184783935546875e+02 -4.196136474609375000e+00 1.861707270145416260e-01 0.000000000000000000e+00 1.880779907226562500e+03 4.000000000000000000e+00 1.459260864257812500e+02
0.000000000000000000e+00 2.256461538461538225e+02 1.710536193847656250e+02 -1.597460937500000000e+01 9.999474287033081055e-01 0.000000000000000000e+00 6.198962402343750000e+02 1.000000000000000000e+00 1.527985992431640625e+02
2.500000000000000000e+01 5.991999999999999318e+02 2.865671997070312500e+02 -4.787658691406250000e+00 3.182201087474822998e-01 6.470588445663452148e-01 1.764668945312500000e+03 3.000000000000000000e+00 1.457088470458984375e+02
2.100000000000000000e+01 5.444153846153849372e+02 1.648798065185546875e+02 -3.478393554687500000e-01 0.000000000000000000e+00 0.000000000000000000e+00 1.889320922851562500e+03 3.000000000000000000e+00 9.257758178710937500e+02
9.000000000000000000e+00 3.166846153846154266e+02 2.220154724121093750e+02 -1.067272949218750000e+01 9.785638451576232910e-01 0.000000000000000000e+00 1.046419189453125000e+03 1.000000000000000000e+00 2.984377136230468750e+02
3.600000000000000000e+01 5.266153846153846416e+02 2.874617309570312500e+02 -4.835052490234375000e+00 3.949807286262512207e-01 0.000000000000000000e+00 1.375652832031250000e+03 3.000000000000000000e+00 1.766699218750000000e+01
6.300000000000000000e+01 1.087761538461538521e+03 4.929193725585937500e+02 -7.998352050781250000e-01 9.999999776482582092e-03 0.000000000000000000e+00 1.664089721679687500e+03 4.000000000000000000e+00 3.548988647460937500e+02
2.200000000000000000e+01 2.462153846153846075e+02 1.642435913085937500e+02 -9.089111328125000000e+00 7.760868072509765625e-01 0.000000000000000000e+00 1.140812255859375000e+03 3.000000000000000000e+00 4.912797546386718750e+02
2.600000000000000000e+01 6.481538461538461888e+02 3.396916198730468750e+02 -2.921569824218750000e+00 9.999999776482582092e-03 0.000000000000000000e+00 1.984001953125000000e+03 3.000000000000000000e+00 1.638378295898437500e+02
1.000000000000000000e+01 2.448999999999999204e+02 1.778122558593750000e+02 -9.735748291015625000e+00 7.932304143905639648e-01 5.294117927551269531e-01 7.883967285156250000e+02 2.000000000000000000e+00 1.195827392578125000e+03
0.000000000000000000e+00 2.233999999999999773e+02 1.541873626708984375e+02 -1.232781982421875000e+01 9.982163310050964355e-01 0.000000000000000000e+00 8.322283325195312500e+02 1.000000000000000000e+00 2.428950195312500000e+02
0.000000000000000000e+00 2.493307692307691639e+02 1.628224487304687500e+02 -1.449353027343750000e+01 9.999198913574218750e-01 0.000000000000000000e+00 7.555260620117187500e+02 1.000000000000000000e+00 3.000038146972656250e+02
4.200000000000000000e+01 6.341076923076924459e+02 3.129905395507812500e+02 -4.026885986328125000e+00 1.847496181726455688e-01 2.352941185235977173e-01 1.936530517578125000e+03 3.000000000000000000e+00 2.205719451904296875e+02
2.900000000000000000e+01 4.577692307692308304e+02 2.314430847167968750e+02 -1.015991210937500000e+00 0.000000000000000000e+00 0.000000000000000000e+00 1.863620483398437500e+03 3.000000000000000000e+00 7.454740600585937500e+02
4.000000000000000000e+00 3.622538461538460410e+02 2.264656982421875000e+02 -5.686462402343750000e+00 3.985428810119628906e-01 0.000000000000000000e+00 1.015035766601562500e+03 1.000000000000000000e+00 2.652906417846679688e+01
0.000000000000000000e+00 1.755384615384616041e+02 9.759461975097656250e+01 -1.267053222656250000e+01 9.797436594963073730e-01 0.000000000000000000e+00 7.736118774414062500e+02 1.000000000000000000e+00 4.968747329711914062e+01
3.900000000000000000e+01 5.759384615384614108e+02 2.829960632324218750e+02 -4.668273925781250000e+00 2.569814920425415039e-01 0.000000000000000000e+00 1.886207153320312500e+03 3.000000000000000000e+00 2.146466217041015625e+02
6.700000000000000000e+01 9.690461538461539703e+02 4.328831787109375000e+02 2.970458984375000000e+00 0.000000000000000000e+00 2.352941185235977173e-01 2.841294433593750000e+03 4.000000000000000000e+00 3.655201110839843750e+02
1.800000000000000000e+01 5.794923076923076906e+02 2.095649871826171875e+02 -4.914581298828125000e+00 4.518175125122070312e-01 0.000000000000000000e+00 1.618587646484375000e+03 2.000000000000000000e+00 1.411889038085937500e+02
0.000000000000000000e+00 1.862384615384615358e+02 2.009758758544921875e+02 -1.619818115234375000e+01 9.999815225601196289e-01 0.000000000000000000e+00 4.026632690429687500e+02 1.000000000000000000e+00 8.442986297607421875e+01
0.000000000000000000e+00 1.865307692307692093e+02 1.690895690917968750e+02 -1.636175537109375000e+01 9.999826550483703613e-01 0.000000000000000000e+00 5.660933837890625000e+02 1.000000000000000000e+00 1.465758361816406250e+02
0.000000000000000000e+00 1.288292307692307531e+03 4.806287536621093750e+02 9.948730468750000000e-01 9.999999776482582092e-03 0.000000000000000000e+00 1.423885253906250000e+03 1.000000000000000000e+00 1.585523681640625000e+03
3.100000000000000000e+01 5.078076923076924913e+02 2.843699035644531250e+02 -6.384826660156250000e+00 5.786930918693542480e-01 5.294117927551269531e-01 1.582889770507812500e+03 3.000000000000000000e+00 2.730795898437500000e+02
5.600000000000000000e+01 5.062923076923077588e+02 4.263088989257812500e+02 4.146301269531250000e+00 0.000000000000000000e+00 2.941176414489746094e+00 2.794702148437500000e+03 4.000000000000000000e+00 1.194411621093750000e+03
6.700000000000000000e+01 1.350184615384615199e+03 5.436701049804687500e+02 2.148101806640625000e+00 0.000000000000000000e+00 0.000000000000000000e+00 2.454624267578125000e+03 4.000000000000000000e+00 6.895606079101562500e+02
0.000000000000000000e+00 1.558153846153846303e+02 1.161225509643554688e+02 -1.125686645507812500e+01 9.954625368118286133e-01 0.000000000000000000e+00 5.550151977539062500e+02 1.000000000000000000e+00 2.684492797851562500e+02
2.000000000000000000e+00 3.453692307692305121e+02 2.442580871582031250e+02 -1.805236816406250000e+00 0.000000000000000000e+00 5.882352963089942932e-02 1.353142578125000000e+03 1.000000000000000000e+00 4.567500915527343750e+02
2.100000000000000000e+01 2.708692307692307963e+02 1.522282409667968750e+02 -9.339935302734375000e+00 6.689166426658630371e-01 2.352941185235977173e-01 1.139191284179687500e+03 3.000000000000000000e+00 2.367662048339843750e+02
0.000000000000000000e+00 1.573076923076923492e+02 1.162810363769531250e+02 -1.341043090820312500e+01 9.983231425285339355e-01 0.000000000000000000e+00 8.053603515625000000e+02 1.000000000000000000e+00 3.354658203125000000e+02
1.100000000000000000e+01 1.106769230769231456e+02 1.410787658691406250e+02 -9.295867919921875000e+00 9.512777924537658691e-01 0.000000000000000000e+00 1.152730102539062500e+03 2.000000000000000000e+00 6.750764770507812500e+02
2.700000000000000000e+01 6.010999999999999091e+02 2.383549346923828125e+02 -4.897430419921875000e+00 3.442011773586273193e-01 0.000000000000000000e+00 1.600726684570312500e+03 3.000000000000000000e+00 1.313892364501953125e+02
0.000000000000000000e+00 1.721615384615385835e+02 8.191403198242187500e+01 -1.245315551757812500e+01 9.879415035247802734e-01 0.000000000000000000e+00 7.668358154296875000e+02 1.000000000000000000e+00 9.409053039550781250e+01
0.000000000000000000e+00 1.919615384615384528e+02 8.634930419921875000e+01 -1.300656127929687500e+01 9.982831478118896484e-01 0.000000000000000000e+00 8.215433959960937500e+02 1.000000000000000000e+00 3.041528320312500000e+02
6.300000000000000000e+01 7.994615384615382254e+02 4.354058532714843750e+02 -2.381256103515625000e+00 9.999999776482582092e-03 0.000000000000000000e+00 1.968983520507812500e+03 4.000000000000000000e+00 2.552024536132812500e+02
0.000000000000000000e+00 1.153769230769230774e+02 1.151845321655273438e+02 -1.434652709960937500e+01 9.999011158943176270e-01 0.000000000000000000e+00 6.477318115234375000e+02 1.000000000000000000e+00 1.510833740234375000e+02
2.500000000000000000e+01 8.474846153846154948e+02 4.560327148437500000e+02 -1.216796875000000000e+00 0.000000000000000000e+00 0.000000000000000000e+00 2.179717773437500000e+03 3.000000000000000000e+00 3.131561279296875000e+02
9.000000000000000000e+00 8.014615384615383391e+02 2.135854644775390625e+02 -6.088500976562500000e+00 8.301753997802734375e-01 0.000000000000000000e+00 7.340933227539062500e+02 1.000000000000000000e+00 5.241501464843750000e+02
3.400000000000000000e+01 3.964615384615384528e+02 2.426032867431640625e+02 -5.915405273437500000e+00 6.169965863227844238e-01 9.411764740943908691e-01 1.482063110351562500e+03 3.000000000000000000e+00 4.659799804687500000e+02
3.700000000000000000e+01 3.180923076923078270e+02 1.897359313964843750e+02 -4.025054931640625000e+00 2.156595587730407715e-01 0.000000000000000000e+00 1.937884643554687500e+03 3.000000000000000000e+00 2.428545684814453125e+02
2.600000000000000000e+01 1.323692307692307395e+02 1.249224319458007812e+02 -8.624511718750000000e+00 5.750267505645751953e-01 8.823529481887817383e-01 1.229528686523437500e+03 3.000000000000000000e+00 2.364478912353515625e+02
5.600000000000000000e+01 9.458384615384613880e+02 4.728385620117187500e+02 -3.437805175781250000e-01 0.000000000000000000e+00 0.000000000000000000e+00 2.191089599609375000e+03 4.000000000000000000e+00 4.692007446289062500e+02
1.900000000000000000e+01 1.878307692307693628e+02 5.670471954345703125e+01 -8.069122314453125000e+00 6.785389184951782227e-01 0.000000000000000000e+00 8.193944702148437500e+02 2.000000000000000000e+00 1.191615112304687500e+03
3.400000000000000000e+01 7.169461538461538339e+02 6.567028808593750000e+02 -3.198699951171875000e+00 1.230447441339492798e-01 0.000000000000000000e+00 6.678005981445312500e+02 3.000000000000000000e+00 1.130247802734375000e+03
5.000000000000000000e+00 2.454461538461538623e+02 1.589419250488281250e+02 -1.322213745117187500e+01 9.993050098419189453e-01 0.000000000000000000e+00 8.298576049804687500e+02 1.000000000000000000e+00 1.514149322509765625e+02
5.000000000000000000e+01 5.371461538461537657e+02 3.412410888671875000e+02 -3.584533691406250000e+00 1.216242164373397827e-01 9.411764740943908691e-01 1.957227783203125000e+03 4.000000000000000000e+00 3.613116760253906250e+02
4.600000000000000000e+01 1.543084615384614608e+03 4.552609558105468750e+02 2.492736816406250000e+00 0.000000000000000000e+00 0.000000000000000000e+00 1.768163574218750000e+03 4.000000000000000000e+00 1.075796630859375000e+03
1.000000000000000000e+00 8.226769230769228898e+02 3.093578186035156250e+02 2.022705078125000000e+00 0.000000000000000000e+00 0.000000000000000000e+00 1.643974121093750000e+03 1.000000000000000000e+00 4.606279296875000000e+02
1.700000000000000000e+01 7.000923076923075996e+02 3.658659057617187500e+02 -6.265594482421875000e+00 6.491055488586425781e-01 0.000000000000000000e+00 1.251713989257812500e+03 2.000000000000000000e+00 3.619580688476562500e+02
2.500000000000000000e+01 9.827692307692299778e+01 1.440895233154296875e+02 -1.084829711914062500e+01 8.055090308189392090e-01 7.647058963775634766e-01 1.126309082031250000e+03 3.000000000000000000e+00 2.738266906738281250e+02
1.000000000000000000e+00 3.497000000000000455e+02 2.459786224365234375e+02 -8.933685302734375000e+00 8.842582106590270996e-01 0.000000000000000000e+00 1.175558227539062500e+03 1.000000000000000000e+00 3.437095031738281250e+02
7.000000000000000000e+00 4.072923076923073609e+02 2.049329986572265625e+02 -5.005920410156250000e+00 4.594304263591766357e-01 0.000000000000000000e+00 1.423294921875000000e+03 1.000000000000000000e+00 2.872207946777343750e+02
3.300000000000000000e+01 2.888692307692307395e+02 3.077062683105468750e+02 7.606811523437500000e-01 0.000000000000000000e+00 4.117647111415863037e-01 2.194704589843750000e+03 3.000000000000000000e+00 1.587174438476562500e+03
7.000000000000000000e+00 3.025692307692307281e+02 1.935520172119140625e+02 -6.018463134765625000e+00 5.873723626136779785e-01 5.294117927551269531e-01 1.533826293945312500e+03 1.000000000000000000e+00 3.323628845214843750e+02
1.900000000000000000e+01 6.566846153846151992e+02 3.758872375488281250e+02 -2.153503417968750000e+00 9.999999776482582092e-03 0.000000000000000000e+00 2.078345214843750000e+03 2.000000000000000000e+00 1.016746139526367188e+02
1.000000000000000000e+01 1.450615384615385040e+02 1.270161895751953125e+02 -7.103912353515625000e+00 8.102421760559082031e-01 0.000000000000000000e+00 1.168213500976562500e+03 2.000000000000000000e+00 8.454013671875000000e+02
5.900000000000000000e+01 2.790461538461537998e+02 2.644379272460937500e+02 5.706787109375000000e-02 0.000000000000000000e+00 1.235294103622436523e+00 2.321963134765625000e+03 4.000000000000000000e+00 1.889574462890625000e+03
3.000000000000000000e+01 4.775461538461539703e+02 2.656538696289062500e+02 -6.037506103515625000e+00 1.717053055763244629e-01 5.294117927551269531e-01 1.114510742187500000e+03 3.000000000000000000e+00 1.805610046386718750e+02
6.000000000000000000e+01 5.597230769230768601e+02 2.837608032226562500e+02 -4.855651855468750000e+00 2.679323852062225342e-01 5.882353186607360840e-01 1.845931640625000000e+03 4.000000000000000000e+00 2.084330596923828125e+02
1.800000000000000000e+01 2.477615384615384926e+02 1.129461822509765625e+02 -8.964263916015625000e+00 8.013263344764709473e-01 0.000000000000000000e+00 1.159318481445312500e+03 2.000000000000000000e+00 1.506322937011718750e+02
4.500000000000000000e+01 6.779153846153848235e+02 2.941304626464843750e+02 -2.992492675781250000e+00 9.999999776482582092e-03 2.352941185235977173e-01 1.977012329101562500e+03 4.000000000000000000e+00 1.739680328369140625e+02
5.400000000000000000e+01 9.354923076923076906e+02 3.595880126953125000e+02 1.613586425781250000e+00 0.000000000000000000e+00 0.000000000000000000e+00 2.511989501953125000e+03 4.000000000000000000e+00 4.522672424316406250e+02
5.100000000000000000e+01 5.094999999999999432e+02 4.180206909179687500e+02 -5.288879394531250000e+00 9.999999776482582092e-03 0.000000000000000000e+00 1.012578125000000000e+03 4.000000000000000000e+00 3.599745178222656250e+02
1.000000000000000000e+00 1.770615384615384471e+02 9.840199279785156250e+01 -1.272711181640625000e+01 9.788000583648681641e-01 0.000000000000000000e+00 7.744401855468750000e+02 1.000000000000000000e+00 7.627867889404296875e+01
7.000000000000000000e+00 5.307076923076924686e+02 2.252395324707031250e+02 -2.871826171875000000e+00 9.999999776482582092e-03 0.000000000000000000e+00 1.291026733398437500e+03 1.000000000000000000e+00 1.410303955078125000e+02
4.600000000000000000e+01 6.137076923076922412e+02 3.843240661621093750e+02 -3.785491943359375000e+00 4.493038058280944824e-01 0.000000000000000000e+00 1.211919067382812500e+03 4.000000000000000000e+00 1.580160400390625000e+03
5.500000000000000000e+01 1.324438461538462434e+03 4.758683166503906250e+02 4.376434326171875000e+00 0.000000000000000000e+00 0.000000000000000000e+00 2.370358886718750000e+03 4.000000000000000000e+00 2.218387451171875000e+02
6.000000000000000000e+00 5.261384615384615699e+02 2.595296325683593750e+02 4.365753173828125000e+00 0.000000000000000000e+00 0.000000000000000000e+00 3.323647216796875000e+03 1.000000000000000000e+00 5.911144409179687500e+02
1.000000000000000000e+01 2.448999999999999204e+02 1.778122558593750000e+02 -9.735748291015625000e+00 7.932304143905639648e-01 5.294117927551269531e-01 7.883967285156250000e+02 2.000000000000000000e+00 1.195827392578125000e+03
0.000000000000000000e+00 3.293923076923080089e+02 1.409511108398437500e+02 4.958221435546875000e+00 0.000000000000000000e+00 0.000000000000000000e+00 3.409952392578125000e+03 1.000000000000000000e+00 8.735794677734375000e+02
6.700000000000000000e+01 6.045384615384616609e+02 2.650178222656250000e+02 1.083984375000000000e+00 0.000000000000000000e+00 2.352941185235977173e-01 2.789942626953125000e+03 4.000000000000000000e+00 3.350627746582031250e+02
0.000000000000000000e+00 2.156076923076923606e+02 1.597268218994140625e+02 -1.277645874023437500e+01 9.991514086723327637e-01 0.000000000000000000e+00 8.090976562500000000e+02 1.000000000000000000e+00 1.588066101074218750e+02
2.000000000000000000e+00 5.599000000000002046e+02 2.682603149414062500e+02 -8.463439941406250000e+00 8.922569751739501953e-01 0.000000000000000000e+00 8.357491455078125000e+02 1.000000000000000000e+00 2.477858123779296875e+02
0.000000000000000000e+00 1.742076923076923265e+02 9.427506256103515625e+01 -1.261395263671875000e+01 9.829062819480895996e-01 0.000000000000000000e+00 7.725878906250000000e+02 1.000000000000000000e+00 6.246210479736328125e+01
1.000000000000000000e+00 3.230999999999998522e+02 1.848735198974609375e+02 2.836761474609375000e+00 0.000000000000000000e+00 0.000000000000000000e+00 2.861501708984375000e+03 1.000000000000000000e+00 7.541359252929687500e+02
8.000000000000000000e+00 2.236307692307692037e+02 1.963742218017578125e+02 -9.282501220703125000e+00 8.167487382888793945e-01 0.000000000000000000e+00 9.418721313476562500e+02 1.000000000000000000e+00 4.219607162475585938e+01
7.000000000000000000e+00 2.777076923076922981e+02 2.010669860839843750e+02 -1.132458496093750000e+01 9.876532554626464844e-01 0.000000000000000000e+00 9.813889770507812500e+02 1.000000000000000000e+00 3.024627990722656250e+02
4.800000000000000000e+01 9.510384615384616609e+02 4.826366271972656250e+02 -2.502136230468750000e-01 0.000000000000000000e+00 5.882353186607360840e-01 2.274777832031250000e+03 4.000000000000000000e+00 4.197441711425781250e+02
3.000000000000000000e+01 3.420769230769229239e+02 2.043097381591796875e+02 -3.439483642578125000e+00 1.538262218236923218e-01 5.882353186607360840e-01 2.022408813476562500e+03 3.000000000000000000e+00 3.137530517578125000e+02
3.700000000000000000e+01 3.666153846153846985e+02 1.877110748291015625e+02 -5.902221679687500000e+00 2.592583894729614258e-01 1.176470592617988586e-01 1.443655395507812500e+03 3.000000000000000000e+00 1.121353225708007812e+02
6.600000000000000000e+01 1.434707692307692696e+03 6.632219848632812500e+02 4.288024902343750000e+00 0.000000000000000000e+00 0.000000000000000000e+00 2.622869628906250000e+03 4.000000000000000000e+00 1.260719970703125000e+03
9.000000000000000000e+00 2.623307692307691923e+02 2.021695251464843750e+02 -8.880767822265625000e+00 7.318410873413085938e-01 0.000000000000000000e+00 1.104020874023437500e+03 1.000000000000000000e+00 1.866238861083984375e+02
8.000000000000000000e+00 2.862538461538461547e+02 1.531259307861328125e+02 -7.908386230468750000e+00 6.746702194213867188e-01 5.882352963089942932e-02 1.179312133789062500e+03 1.000000000000000000e+00 2.281423950195312500e+02
4.000000000000000000e+00 2.171230769230769795e+02 1.932367095947265625e+02 -9.080902099609375000e+00 9.011731743812561035e-01 0.000000000000000000e+00 9.217201538085937500e+02 1.000000000000000000e+00 2.398553009033203125e+02
1.900000000000000000e+01 6.405307692307692378e+02 3.832672424316406250e+02 -3.493652343750000000e+00 2.534312307834625244e-01 5.882353186607360840e-01 1.669210937500000000e+03 2.000000000000000000e+00 4.217323303222656250e+01
0.000000000000000000e+00 3.994923076923076906e+02 1.958663940429687500e+02 -1.052230834960937500e+01 9.822685122489929199e-01 0.000000000000000000e+00 4.754264831542968750e+02 1.000000000000000000e+00 2.055851135253906250e+02
4.200000000000000000e+01 3.460000000000002274e+02 2.569897155761718750e+02 1.145477294921875000e+00 0.000000000000000000e+00 8.235294222831726074e-01 2.337525878906250000e+03 3.000000000000000000e+00 1.482309692382812500e+03
6.300000000000000000e+01 5.228000000000002956e+02 2.268004913330078125e+02 -5.905364990234375000e+00 1.391110271215438843e-01 0.000000000000000000e+00 9.844677124023437500e+02 4.000000000000000000e+00 1.399731079101562500e+03
1.000000000000000000e+01 5.909461538461539476e+02 3.616712341308593750e+02 -6.867218017578125000e+00 8.014712929725646973e-01 0.000000000000000000e+00 1.037861450195312500e+03 2.000000000000000000e+00 1.704030761718750000e+02
4.900000000000000000e+01 1.088330769230769420e+03 4.734266967773437500e+02 -6.063232421875000000e-01 0.000000000000000000e+00 0.000000000000000000e+00 2.142038818359375000e+03 4.000000000000000000e+00 1.893049163818359375e+02
2.000000000000000000e+00 6.561615384615386120e+02 3.429375915527343750e+02 -7.640411376953125000e+00 8.075142502784729004e-01 0.000000000000000000e+00 1.101785034179687500e+03 1.000000000000000000e+00 2.882894897460937500e+02
3.500000000000000000e+01 1.702307692307692264e+02 1.470475769042968750e+02 -9.654998779296875000e+00 5.936807990074157715e-01 1.117647051811218262e+00 1.159300170898437500e+03 3.000000000000000000e+00 2.087722015380859375e+02
1.100000000000000000e+01 1.943230769230769681e+02 1.717590179443359375e+02 -7.425079345703125000e+00 5.793424844741821289e-01 1.058823585510253906e+00 1.040430541992187500e+03 2.000000000000000000e+00 8.012510986328125000e+02
6.600000000000000000e+01 1.142976923076922958e+03 4.758912353515625000e+02 8.994140625000000000e-01 0.000000000000000000e+00 0.000000000000000000e+00 2.429198974609375000e+03 4.000000000000000000e+00 2.019501953125000000e+02
1.700000000000000000e+01 6.003999999999998636e+02 1.984737091064453125e+02 -4.661437988281250000e+00 3.624574244022369385e-01 0.000000000000000000e+00 1.691178344726562500e+03 2.000000000000000000e+00 1.204354782104492188e+02
6.000000000000000000e+00 3.896384615384614563e+02 1.796125335693359375e+02 2.924774169921875000e+00 0.000000000000000000e+00 0.000000000000000000e+00 3.135220214843750000e+03 1.000000000000000000e+00 6.531287231445312500e+02
2.600000000000000000e+01 2.109230769230769624e+02 1.049514617919921875e+02 -8.394958496093750000e+00 9.075514674186706543e-01 9.411764740943908691e-01 8.264513549804687500e+02 3.000000000000000000e+00 1.675807617187500000e+03
6.900000000000000000e+01 1.092699999999999591e+03 5.226434936523437500e+02 7.376403808593750000e-01 0.000000000000000000e+00 0.000000000000000000e+00 2.387076171875000000e+03 4.000000000000000000e+00 3.018760375976562500e+02
3.000000000000000000e+01 9.246307692307697153e+02 3.891031494140625000e+02 -5.511138916015625000e+00 4.103499650955200195e-01 0.000000000000000000e+00 1.278864135742187500e+03 3.000000000000000000e+00 5.106763610839843750e+02
5.800000000000000000e+01 7.926076923076926732e+02 3.855066223144531250e+02 4.164611816406250000e+00 0.000000000000000000e+00 0.000000000000000000e+00 3.121708740234375000e+03 4.000000000000000000e+00 3.564528503417968750e+02
1.500000000000000000e+01 5.502846153846153356e+02 2.968170471191406250e+02 -6.541259765625000000e+00 6.603593230247497559e-01 0.000000000000000000e+00 1.520688354492187500e+03 2.000000000000000000e+00 2.049047088623046875e+02
5.200000000000000000e+01 4.421692307692307509e+02 2.317936248779296875e+02 -1.845123291015625000e+00 9.999999776482582092e-03 5.882352963089942932e-02 1.832578857421875000e+03 4.000000000000000000e+00 6.186144409179687500e+02
3.300000000000000000e+01 3.039384615384614676e+02 1.392420654296875000e+02 -6.244781494140625000e+00 6.025991439819335938e-01 0.000000000000000000e+00 1.308819213867187500e+03 3.000000000000000000e+00 3.005466613769531250e+02
4.600000000000000000e+01 4.202000000000002160e+02 1.959830627441406250e+02 -8.796966552734375000e+00 4.730792045593261719e-01 0.000000000000000000e+00 7.917737426757812500e+02 4.000000000000000000e+00 9.832418212890625000e+02
0.000000000000000000e+00 1.235769230769230802e+02 9.454496002197265625e+01 -1.481616210937500000e+01 9.999465942382812500e-01 0.000000000000000000e+00 5.557201538085937500e+02 1.000000000000000000e+00 6.047753143310546875e+01
0.000000000000000000e+00 7.375384615384618314e+01 1.346265411376953125e+02 -1.175970458984375000e+01 9.824177622795104980e-01 5.882353186607360840e-01 9.851271972656250000e+02 1.000000000000000000e+00 4.750887756347656250e+02
1.000000000000000000e+00 7.781538461538461604e+01 1.235998764038085938e+02 -1.248348999023437500e+01 9.917838573455810547e-01 0.000000000000000000e+00 9.684965209960937500e+02 1.000000000000000000e+00 8.504714355468750000e+02
0.000000000000000000e+00 1.902076923076923549e+02 1.337409515380859375e+02 -1.189428710937500000e+01 9.858009219169616699e-01 0.000000000000000000e+00 8.275173950195312500e+02 1.000000000000000000e+00 4.165751342773437500e+02
6.200000000000000000e+01 7.002384615384614790e+02 4.115047302246093750e+02 4.246490478515625000e+00 0.000000000000000000e+00 2.352941185235977173e-01 2.752680419921875000e+03 4.000000000000000000e+00 2.407530059814453125e+02
5.800000000000000000e+01 4.973769230769231058e+02 2.453249969482421875e+02 -6.082977294921875000e+00 9.999999776482582092e-03 0.000000000000000000e+00 8.815812377929687500e+02 4.000000000000000000e+00 1.215160278320312500e+03
1.500000000000000000e+01 5.304615384615384528e+02 2.088024597167968750e+02 -5.114440917968750000e+00 5.365428328514099121e-01 0.000000000000000000e+00 1.372073730468750000e+03 2.000000000000000000e+00 2.433452224731445312e+01
0.000000000000000000e+00 2.860769230769230376e+02 1.988074951171875000e+02 -9.669464111328125000e+00 9.986841678619384766e-01 5.882352963089942932e-02 1.005170959472656250e+03 1.000000000000000000e+00 1.584237915039062500e+03
2.100000000000000000e+01 2.690192307692308077e+03 6.543631591796875000e+02 7.304656982421875000e+00 0.000000000000000000e+00 2.941176593303680420e-01 3.328574951171875000e+03 3.000000000000000000e+00 1.167061767578125000e+03
4.000000000000000000e+00 4.773230769230769965e+02 3.827911071777343750e+02 -6.084259033203125000e+00 6.044403910636901855e-01 2.941176593303680420e-01 8.703691406250000000e+02 1.000000000000000000e+00 1.262538452148437500e+03
6.600000000000000000e+01 6.665538461538458250e+02 3.026637573242187500e+02 -3.031494140625000000e+00 9.999999776482582092e-03 8.235294222831726074e-01 2.074265625000000000e+03 4.000000000000000000e+00 2.834273376464843750e+02
5.100000000000000000e+01 4.461230769230769511e+02 2.656887207031250000e+02 -3.423065185546875000e+00 1.092520207166671753e-01 5.882353186607360840e-01 1.946463623046875000e+03 4.000000000000000000e+00 4.732763061523437500e+02
7.000000000000000000e+00 1.868000000000000114e+02 1.803722686767578125e+02 -1.072482299804687500e+01 9.615119695663452148e-01 0.000000000000000000e+00 9.150935668945312500e+02 1.000000000000000000e+00 3.402360839843750000e+02
9.000000000000000000e+00 1.251692307692307935e+02 1.163100891113281250e+02 -1.105126953125000000e+01 9.915315508842468262e-01 0.000000000000000000e+00 6.697843627929687500e+02 1.000000000000000000e+00 2.430626869201660156e+01
4.000000000000000000e+00 3.363307692307693060e+02 2.500429229736328125e+02 -5.858184814453125000e+00 6.985951066017150879e-01 0.000000000000000000e+00 1.347173950195312500e+03 1.000000000000000000e+00 4.085021057128906250e+02
6.000000000000000000e+00 2.686769230769230603e+02 1.959407501220703125e+02 -1.183966064453125000e+01 9.977552890777587891e-01 0.000000000000000000e+00 7.387872314453125000e+02 1.000000000000000000e+00 4.503564453125000000e+01
2.300000000000000000e+01 9.583230769230772239e+02 4.095215148925781250e+02 -4.110290527343750000e+00 3.187821209430694580e-01 6.470588445663452148e-01 1.526789672851562500e+03 3.000000000000000000e+00 6.657482299804687500e+02
1.500000000000000000e+01 2.615384615384615472e+02 1.435799865722656250e+02 -9.227355957031250000e+00 7.956605553627014160e-01 2.352941185235977173e-01 1.150060668945312500e+03 2.000000000000000000e+00 1.453190765380859375e+02
6.300000000000000000e+01 7.872923076923077588e+02 3.207713317871093750e+02 1.266784667968750000e+00 0.000000000000000000e+00 0.000000000000000000e+00 2.331977294921875000e+03 4.000000000000000000e+00 4.775141601562500000e+02
6.200000000000000000e+01 1.040815384615384119e+03 4.462725219726562500e+02 -2.813446044921875000e+00 1.802226006984710693e-01 0.000000000000000000e+00 1.598370849609375000e+03 4.000000000000000000e+00 4.587349853515625000e+02
1.800000000000000000e+01 7.355384615384617746e+02 3.845582885742187500e+02 -6.385253906250000000e+00 6.152860522270202637e-01 0.000000000000000000e+00 1.206450439453125000e+03 2.000000000000000000e+00 3.588356323242187500e+02
4.300000000000000000e+01 5.003538461538461775e+02 3.197544860839843750e+02 -4.243133544921875000e+00 2.078127712011337280e-01 1.058823585510253906e+00 1.831039794921875000e+03 3.000000000000000000e+00 4.846112060546875000e+02
3.700000000000000000e+01 8.765076923076928779e+02 3.177095336914062500e+02 3.176086425781250000e+00 0.000000000000000000e+00 0.000000000000000000e+00 1.795720703125000000e+03 3.000000000000000000e+00 9.661580657958984375e+01
2.200000000000000000e+01 5.425000000000002274e+02 2.608096618652343750e+02 -4.411956787109375000e+00 3.334086239337921143e-01 0.000000000000000000e+00 1.565903564453125000e+03 3.000000000000000000e+00 5.259692764282226562e+01
5.900000000000000000e+01 6.442538461538460979e+02 2.749826660156250000e+02 -4.314575195312500000e-01 0.000000000000000000e+00 5.882353186607360840e-01 1.335753173828125000e+03 4.000000000000000000e+00 1.011596496582031250e+03
0.000000000000000000e+00 3.007769230769230830e+02 2.319210662841796875e+02 -1.075854492187500000e+01 9.899730086326599121e-01 0.000000000000000000e+00 4.121617431640625000e+02 1.000000000000000000e+00 3.621587753295898438e+00
9.000000000000000000e+00 3.578230769230769965e+02 2.881872863769531250e+02 -9.051788330078125000e+00 9.374214410781860352e-01 0.000000000000000000e+00 1.064428588867187500e+03 1.000000000000000000e+00 5.212133407592773438e+01
6.600000000000000000e+01 6.803923076923074404e+02 6.017977905273437500e+02 -6.750488281250000000e-02 0.000000000000000000e+00 0.000000000000000000e+00 1.116268920898437500e+03 4.000000000000000000e+00 6.563765258789062500e+02
7.100000000000000000e+01 1.069492307692307577e+03 5.580230102539062500e+02 -1.895080566406250000e+00 9.999999776482582092e-03 0.000000000000000000e+00 1.772738403320312500e+03 4.000000000000000000e+00 2.961255798339843750e+02
4.000000000000000000e+00 6.378230769230765418e+02 3.451572570800781250e+02 -8.013793945312500000e+00 8.378705382347106934e-01 0.000000000000000000e+00 1.087092041015625000e+03 1.000000000000000000e+00 2.283166503906250000e+02
3.400000000000000000e+01 1.241907692307691377e+03 5.323687133789062500e+02 5.638488769531250000e+00 0.000000000000000000e+00 0.000000000000000000e+00 2.561031005859375000e+03 3.000000000000000000e+00 7.335133361816406250e+01
9.000000000000000000e+00 3.578230769230769965e+02 2.881872863769531250e+02 -9.051788330078125000e+00 9.374214410781860352e-01 0.000000000000000000e+00 1.064428588867187500e+03 1.000000000000000000e+00 5.212133407592773438e+01
4.700000000000000000e+01 7.451692307692311488e+02 3.996348571777343750e+02 4.318328857421875000e+00 0.000000000000000000e+00 0.000000000000000000e+00 3.059632812500000000e+03 4.000000000000000000e+00 5.262229003906250000e+02
0.000000000000000000e+00 4.466384615384612289e+02 2.456023864746093750e+02 -9.059814453125000000e+00 9.805902242660522461e-01 0.000000000000000000e+00 8.739452514648437500e+02 1.000000000000000000e+00 1.840984497070312500e+03
6.000000000000000000e+01 6.536769230769225487e+02 2.768323669433593750e+02 -3.959075927734375000e+00 1.661595106124877930e-01 0.000000000000000000e+00 1.830828125000000000e+03 4.000000000000000000e+00 1.685070953369140625e+02
9.000000000000000000e+00 3.807692307692308304e+02 2.248587341308593750e+02 -5.381530761718750000e+00 3.363820314407348633e-01 1.058823585510253906e+00 1.399424072265625000e+03 1.000000000000000000e+00 1.443285827636718750e+02
0.000000000000000000e+00 1.966999999999999602e+02 1.549033966064453125e+02 -1.213446044921875000e+01 9.800071120262145996e-01 0.000000000000000000e+00 8.606597290039062500e+02 1.000000000000000000e+00 3.810773010253906250e+02
1.500000000000000000e+01 1.482769230769231115e+02 1.588449554443359375e+02 -1.086471557617187500e+01 9.115840792655944824e-01 0.000000000000000000e+00 1.088845581054687500e+03 2.000000000000000000e+00 6.271524047851562500e+02
0.000000000000000000e+00 1.995692307692307281e+02 1.389858093261718750e+02 -9.536315917968750000e+00 9.695367217063903809e-01 0.000000000000000000e+00 1.002691345214843750e+03 1.000000000000000000e+00 2.259829406738281250e+02
1.900000000000000000e+01 3.787153846153845507e+02 2.552829284667968750e+02 -8.093231201171875000e+00 8.081245422363281250e-01 0.000000000000000000e+00 1.252512573242187500e+03 2.000000000000000000e+00 3.360000000000000000e+02
8.000000000000000000e+00 1.668846153846153868e+02 1.269567565917968750e+02 -9.987854003906250000e+00 9.774577021598815918e-01 0.000000000000000000e+00 8.795968017578125000e+02 1.000000000000000000e+00 1.178446655273437500e+02
0.000000000000000000e+00 2.400461538461537998e+02 1.589496917724609375e+02 -1.495364379882812500e+01 9.999607801437377930e-01 0.000000000000000000e+00 7.090166625976562500e+02 1.000000000000000000e+00 3.029255371093750000e+02
6.800000000000000000e+01 8.326769230769234582e+02 3.773595275878906250e+02 -8.385314941406250000e-01 0.000000000000000000e+00 0.000000000000000000e+00 2.308394287109375000e+03 4.000000000000000000e+00 4.446458435058593750e+02
4.700000000000000000e+01 9.292999999999994998e+02 3.921983642578125000e+02 -4.573608398437500000e+00 2.160229980945587158e-01 2.352941185235977173e-01 1.440308349609375000e+03 4.000000000000000000e+00 4.947520446777343750e+02
2.200000000000000000e+01 3.794461538461538339e+02 2.274002990722656250e+02 -5.352569580078125000e+00 2.907176017761230469e-01 5.882353186607360840e-01 1.413004882812500000e+03 3.000000000000000000e+00 5.489597320556640625e+01
4.900000000000000000e+01 9.696461538461537657e+02 4.399957275390625000e+02 5.116271972656250000e-01 0.000000000000000000e+00 0.000000000000000000e+00 2.347053222656250000e+03 4.000000000000000000e+00 4.327992248535156250e+02
0.000000000000000000e+00 2.486615384615384983e+02 1.569325866699218750e+02 -1.433200073242187500e+01 9.998850822448730469e-01 0.000000000000000000e+00 7.640633544921875000e+02 1.000000000000000000e+00 2.711076049804687500e+02
0.000000000000000000e+00 6.966153846153846985e+01 1.224205856323242188e+02 -1.214678955078125000e+01 9.972445964813232422e-01 0.000000000000000000e+00 8.926970214843750000e+02 1.000000000000000000e+00 6.152460937500000000e+02
7.000000000000000000e+00 5.028461538461538680e+02 2.168778228759765625e+02 -3.070739746093750000e+00 1.197535023093223572e-01 0.000000000000000000e+00 1.345950805664062500e+03 1.000000000000000000e+00 3.882354021072387695e+00
3.500000000000000000e+01 3.451769230769228898e+02 1.745416870117187500e+02 -5.872680664062500000e+00 2.449425905942916870e-01 1.294117689132690430e+00 1.303402221679687500e+03 3.000000000000000000e+00 1.559655303955078125e+02
5.400000000000000000e+01 7.713999999999997499e+02 3.666658630371093750e+02 4.982727050781250000e+00 0.000000000000000000e+00 0.000000000000000000e+00 3.007521240234375000e+03 4.000000000000000000e+00 4.698607482910156250e+02
4.400000000000000000e+01 4.012230769230770306e+02 1.953795166015625000e+02 -2.061645507812500000e+00 9.999999776482582092e-03 2.352941185235977173e-01 2.095744628906250000e+03 3.000000000000000000e+00 3.323123779296875000e+02
2.800000000000000000e+01 3.384307692307693856e+02 1.737548522949218750e+02 -6.273590087890625000e+00 1.594039350748062134e-01 5.294117927551269531e-01 1.229704345703125000e+03 3.000000000000000000e+00 1.042058715820312500e+02
8.000000000000000000e+00 6.698692307692306258e+02 3.631702270507812500e+02 -6.606933593750000000e+00 7.254871726036071777e-01 0.000000000000000000e+00 1.150906005859375000e+03 1.000000000000000000e+00 2.342508544921875000e+02
2.000000000000000000e+00 5.461692307692306940e+02 3.302122497558593750e+02 -8.708618164062500000e+00 8.658378124237060547e-01 0.000000000000000000e+00 9.900906982421875000e+02 1.000000000000000000e+00 1.484582672119140625e+02
1.900000000000000000e+01 6.566846153846151992e+02 3.758872375488281250e+02 -2.153503417968750000e+00 9.999999776482582092e-03 0.000000000000000000e+00 2.078345214843750000e+03 2.000000000000000000e+00 1.016746139526367188e+02
6.800000000000000000e+01 8.128384615384615017e+02 4.367919311523437500e+02 1.727874755859375000e+00 0.000000000000000000e+00 0.000000000000000000e+00 2.741767333984375000e+03 4.000000000000000000e+00 4.045057678222656250e+02
4.800000000000000000e+01 4.454538461538463139e+02 2.045993194580078125e+02 -1.340301513671875000e+00 9.999999776482582092e-03 2.941176593303680420e-01 1.313376708984375000e+03 4.000000000000000000e+00 1.314285156250000000e+03
5.400000000000000000e+01 3.627076923076922981e+02 1.806602630615234375e+02 -3.910919189453125000e+00 1.731022000312805176e-01 0.000000000000000000e+00 1.801394042968750000e+03 4.000000000000000000e+00 2.159613952636718750e+02
2.300000000000000000e+01 9.039692307692309896e+02 3.955249938964843750e+02 -4.638336181640625000e+00 2.994574606418609619e-01 0.000000000000000000e+00 1.431028686523437500e+03 3.000000000000000000e+00 5.318776245117187500e+02
0.000000000000000000e+00 2.381307692307692889e+02 1.523845977783203125e+02 -1.190039062500000000e+01 9.953036308288574219e-01 0.000000000000000000e+00 3.183201599121093750e+02 1.000000000000000000e+00 9.605088806152343750e+01
3.100000000000000000e+01 4.357538461538460979e+02 2.339520416259765625e+02 -9.399230957031250000e+00 6.519080996513366699e-01 0.000000000000000000e+00 8.317730102539062500e+02 3.000000000000000000e+00 1.272458740234375000e+03
3.700000000000000000e+01 2.973307692307693628e+02 1.666853027343750000e+02 -4.706878662109375000e+00 3.050702810287475586e-01 0.000000000000000000e+00 1.845587036132812500e+03 3.000000000000000000e+00 1.855442962646484375e+02
1.300000000000000000e+01 6.157615384615384073e+02 1.864162139892578125e+02 -4.468780517578125000e+00 3.261632919311523438e-01 0.000000000000000000e+00 1.717286865234375000e+03 2.000000000000000000e+00 1.324907531738281250e+02
6.300000000000000000e+01 2.902538461538461547e+02 1.897060089111328125e+02 -6.696258544921875000e+00 6.933042407035827637e-01 0.000000000000000000e+00 1.428051269531250000e+03 4.000000000000000000e+00 3.003357849121093750e+02
1.200000000000000000e+01 2.321999999999999602e+02 2.058193664550781250e+02 -8.499176025390625000e+00 9.178401827812194824e-01 5.882352963089942932e-02 1.172779785156250000e+03 2.000000000000000000e+00 2.774073791503906250e+02
9.000000000000000000e+00 3.867230769230769170e+02 3.146377258300781250e+02 -8.523559570312500000e+00 9.120739102363586426e-01 0.000000000000000000e+00 1.147948974609375000e+03 1.000000000000000000e+00 9.518626403808593750e+01
0.000000000000000000e+00 2.756538461538461320e+02 1.959481353759765625e+02 -1.054583740234375000e+01 9.711346030235290527e-01 0.000000000000000000e+00 9.718729858398437500e+02 1.000000000000000000e+00 3.027052612304687500e+02
4.000000000000000000e+00 6.870769230769229807e+02 3.732030334472656250e+02 -7.222656250000000000e+00 7.327512502670288086e-01 0.000000000000000000e+00 1.035514648437500000e+03 1.000000000000000000e+00 2.793961791992187500e+02
4.000000000000000000e+00 3.244692307692305349e+02 2.140654602050781250e+02 -6.224334716796875000e+00 6.626474261283874512e-01 0.000000000000000000e+00 1.062587036132812500e+03 1.000000000000000000e+00 2.673214111328125000e+02
6.000000000000000000e+00 3.870307692307694651e+02 2.203166656494140625e+02 -3.101501464843750000e-01 0.000000000000000000e+00 0.000000000000000000e+00 1.983904174804687500e+03 1.000000000000000000e+00 1.070752929687500000e+03
1.900000000000000000e+01 5.492923076923075314e+02 2.389806518554687500e+02 -5.225860595703125000e+00 4.381286203861236572e-01 0.000000000000000000e+00 1.361501953125000000e+03 2.000000000000000000e+00 7.484780883789062500e+01
6.100000000000000000e+01 4.307692307692307168e+02 2.308440093994140625e+02 -2.316375732421875000e+00 0.000000000000000000e+00 0.000000000000000000e+00 1.781331420898437500e+03 4.000000000000000000e+00 4.431065368652343750e+02
0.000000000000000000e+00 1.816076923076922185e+02 1.828127441406250000e+02 -1.153286743164062500e+01 9.996110796928405762e-01 0.000000000000000000e+00 8.652149047851562500e+02 1.000000000000000000e+00 1.303092529296875000e+03
5.300000000000000000e+01 7.844769230769231854e+02 4.393803405761718750e+02 -9.275817871093750000e-01 0.000000000000000000e+00 0.000000000000000000e+00 2.309487548828125000e+03 4.000000000000000000e+00 2.851445007324218750e+02
4.000000000000000000e+00 5.610230769230770420e+02 2.315497436523437500e+02 -5.309600830078125000e+00 3.595970869064331055e-01 0.000000000000000000e+00 1.120713134765625000e+03 1.000000000000000000e+00 1.590552001953125000e+03
1.700000000000000000e+01 8.480230769230772694e+02 4.505862121582031250e+02 -6.022521972656250000e+00 5.287954211235046387e-01 0.000000000000000000e+00 1.197774291992187500e+03 2.000000000000000000e+00 5.890216064453125000e+02
3.200000000000000000e+01 6.502923076923078725e+02 3.114085083007812500e+02 -3.529205322265625000e+00 1.361309885978698730e-01 8.823529481887817383e-01 2.005398071289062500e+03 3.000000000000000000e+00 2.362146606445312500e+02
2.900000000000000000e+01 5.176230769230769511e+02 3.095821838378906250e+02 -6.884002685546875000e+00 7.102361917495727539e-01 2.941176593303680420e-01 1.465010864257812500e+03 3.000000000000000000e+00 2.233167572021484375e+02
2.000000000000000000e+00 1.418000000000000114e+02 1.462447052001953125e+02 5.673553466796875000e+00 0.000000000000000000e+00 0.000000000000000000e+00 3.117145751953125000e+03 1.000000000000000000e+00 7.077813720703125000e+02
8.000000000000000000e+00 3.675692307692306144e+02 2.091330718994140625e+02 -9.485992431640625000e+00 7.624043226242065430e-01 2.941176593303680420e-01 8.010906982421875000e+02 1.000000000000000000e+00 1.352885864257812500e+03
2.700000000000000000e+01 1.851153846153847269e+02 4.821473312377929688e+01 -7.554870605468750000e+00 1.967892944812774658e-01 1.058823585510253906e+00 8.577282714843750000e+02 3.000000000000000000e+00 6.977902221679687500e+02
1.000000000000000000e+00 5.889461538461536065e+02 3.147366943359375000e+02 -8.168823242187500000e+00 8.349283337593078613e-01 0.000000000000000000e+00 9.222470703125000000e+02 1.000000000000000000e+00 1.953657379150390625e+02
0.000000000000000000e+00 4.095153846153846189e+02 2.524798278808593750e+02 -1.131854248046875000e+01 9.970886111259460449e-01 0.000000000000000000e+00 3.146777038574218750e+02 1.000000000000000000e+00 1.527111816406250000e+02
1.000000000000000000e+00 3.278923076923078384e+02 1.673427429199218750e+02 2.717163085937500000e+00 0.000000000000000000e+00 2.941176593303680420e-01 3.093960693359375000e+03 1.000000000000000000e+00 1.411353637695312500e+03
5.000000000000000000e+01 9.768846153846156994e+02 3.603787841796875000e+02 1.794464111328125000e+00 0.000000000000000000e+00 0.000000000000000000e+00 2.626537597656250000e+03 4.000000000000000000e+00 4.576498413085937500e+02
9.000000000000000000e+00 7.525538461538459387e+02 1.578445281982421875e+02 -6.785461425781250000e+00 9.153401255607604980e-01 0.000000000000000000e+00 5.269805908203125000e+02 1.000000000000000000e+00 4.327893676757812500e+02
5.200000000000000000e+01 4.479461538461538339e+02 2.159047851562500000e+02 -5.369262695312500000e-01 0.000000000000000000e+00 0.000000000000000000e+00 2.186007080078125000e+03 4.000000000000000000e+00 6.339912109375000000e+02
4.700000000000000000e+01 3.730076923076924231e+02 1.890447235107421875e+02 -6.080383300781250000e+00 4.891118705272674561e-01 0.000000000000000000e+00 1.397844238281250000e+03 4.000000000000000000e+00 5.866355590820312500e+02
3.600000000000000000e+01 1.813307692307691639e+02 1.233805618286132812e+02 -7.158172607421875000e+00 3.898572921752929688e-01 5.882353186607360840e-01 8.935902099609375000e+02 3.000000000000000000e+00 7.712089843750000000e+02
1.800000000000000000e+01 1.238500000000000000e+03 5.105239868164062500e+02 6.083374023437500000e-01 0.000000000000000000e+00 0.000000000000000000e+00 2.407076171875000000e+03 2.000000000000000000e+00 2.236500701904296875e+02
3.900000000000000000e+01 3.228153846153846871e+02 1.781873626708984375e+02 -3.900238037109375000e+00 2.376232743263244629e-01 5.882352963089942932e-02 1.940583984375000000e+03 3.000000000000000000e+00 3.081868896484375000e+02
4.100000000000000000e+01 4.157076923076923549e+02 1.843367004394531250e+02 -4.048767089843750000e+00 1.805713921785354614e-01 0.000000000000000000e+00 1.680905883789062500e+03 3.000000000000000000e+00 2.763589477539062500e+02
7.000000000000000000e+00 1.084300000000000182e+03 6.091499633789062500e+02 -9.727783203125000000e-01 0.000000000000000000e+00 5.882352963089942932e-02 1.087398925781250000e+03 1.000000000000000000e+00 5.696153564453125000e+02
5.900000000000000000e+01 1.083492307692307577e+03 5.519086303710937500e+02 -2.103851318359375000e+00 2.166021019220352173e-01 8.823529481887817383e-01 1.759411621093750000e+03 4.000000000000000000e+00 6.121040039062500000e+02
0.000000000000000000e+00 2.905076923076922526e+02 1.616214599609375000e+02 -1.598785400390625000e+01 9.998561143875122070e-01 0.000000000000000000e+00 1.991132659912109375e+02 1.000000000000000000e+00 6.937850952148437500e+02
4.300000000000000000e+01 9.947769230769229125e+02 4.536697387695312500e+02 -2.775817871093750000e+00 1.329844295978546143e-01 2.941176593303680420e-01 1.749415161132812500e+03 3.000000000000000000e+00 5.385020141601562500e+02
2.700000000000000000e+01 1.705415384615384710e+03 5.819368286132812500e+02 -3.623138427734375000e+00 3.739428818225860596e-01 0.000000000000000000e+00 1.157361083984375000e+03 3.000000000000000000e+00 1.922992797851562500e+03
0.000000000000000000e+00 2.925769230769230944e+02 1.665834960937500000e+02 -7.877746582031250000e+00 9.637839794158935547e-01 0.000000000000000000e+00 1.794487762451171875e+02 1.000000000000000000e+00 7.009870605468750000e+02
0.000000000000000000e+00 1.481461538461538225e+02 1.932314147949218750e+02 -1.190109252929687500e+01 9.996352195739746094e-01 0.000000000000000000e+00 9.990019531250000000e+02 1.000000000000000000e+00 1.385324340820312500e+03
5.700000000000000000e+01 4.210538461538462798e+02 2.556651306152343750e+02 -2.080657958984375000e+00 0.000000000000000000e+00 0.000000000000000000e+00 1.226876098632812500e+03 4.000000000000000000e+00 6.825238647460937500e+02
7.200000000000000000e+01 1.584938461538462434e+03 6.704574584960937500e+02 -2.502441406250000000e-03 0.000000000000000000e+00 0.000000000000000000e+00 1.070034301757812500e+03 4.000000000000000000e+00 3.566893768310546875e+01
2.000000000000000000e+01 7.513000000000002956e+02 4.091109313964843750e+02 -2.434112548828125000e+00 1.099888533353805542e-01 6.470588445663452148e-01 1.957336914062500000e+03 3.000000000000000000e+00 2.157283630371093750e+02
0.000000000000000000e+00 1.273692307692307111e+02 8.077876281738281250e+01 -1.358883666992187500e+01 9.699810743331909180e-01 0.000000000000000000e+00 7.695513305664062500e+02 1.000000000000000000e+00 9.842436218261718750e+01
0.000000000000000000e+00 2.276384615384615984e+02 1.849737854003906250e+02 -1.395071411132812500e+01 9.989770650863647461e-01 0.000000000000000000e+00 2.901992187500000000e+02 1.000000000000000000e+00 2.900088806152343750e+02
1.000000000000000000e+00 1.304723076923077542e+03 5.416193237304687500e+02 -1.486480712890625000e+00 1.070025414228439331e-01 0.000000000000000000e+00 1.063495971679687500e+03 1.000000000000000000e+00 1.310187622070312500e+03
4.500000000000000000e+01 8.595846153846155175e+02 4.435782775878906250e+02 -2.285827636718750000e+00 9.999999776482582092e-03 8.823529481887817383e-01 1.883006103515625000e+03 4.000000000000000000e+00 3.982277526855468750e+02
6.000000000000000000e+00 2.770153846153846189e+02 1.740013732910156250e+02 -1.118344116210937500e+01 9.897313117980957031e-01 0.000000000000000000e+00 4.444594726562500000e+02 1.000000000000000000e+00 1.742399215698242188e+01
4.500000000000000000e+01 4.711384615384616268e+02 2.938200683593750000e+02 -5.697784423828125000e+00 4.422301948070526123e-01 4.705882370471954346e-01 1.650042724609375000e+03 4.000000000000000000e+00 3.178501586914062500e+02
0.000000000000000000e+00 1.777846153846154493e+02 1.475392456054687500e+02 -1.129730224609375000e+01 9.979194998741149902e-01 0.000000000000000000e+00 7.454282226562500000e+02 1.000000000000000000e+00 6.090524291992187500e+02
0.000000000000000000e+00 2.192538461538461547e+02 1.556332092285156250e+02 -1.235272216796875000e+01 9.984779357910156250e-01 0.000000000000000000e+00 8.285722045898437500e+02 1.000000000000000000e+00 2.188199462890625000e+02
5.400000000000000000e+01 4.771230769230768942e+02 2.316675720214843750e+02 -3.736694335937500000e+00 0.000000000000000000e+00 5.294117927551269531e-01 1.481520751953125000e+03 4.000000000000000000e+00 4.430471801757812500e+02
6.100000000000000000e+01 1.971315384615385028e+03 6.710748291015625000e+02 3.878021240234375000e+00 0.000000000000000000e+00 4.705882370471954346e-01 1.989634399414062500e+03 4.000000000000000000e+00 1.709184265136718750e+02
0.000000000000000000e+00 1.327769230769230830e+02 8.877922058105468750e+01 -1.467486572265625000e+01 9.999239444732666016e-01 0.000000000000000000e+00 5.722559204101562500e+02 1.000000000000000000e+00 2.642277717590332031e+01
1.000000000000000000e+00 1.539538461538461718e+02 1.125200271606445312e+02 -1.112918090820312500e+01 9.870942234992980957e-01 0.000000000000000000e+00 6.671347656250000000e+02 1.000000000000000000e+00 1.610141143798828125e+02
1.500000000000000000e+01 2.846692307692307509e+02 1.607014617919921875e+02 -9.115478515625000000e+00 7.289226651191711426e-01 5.294117927551269531e-01 1.153845947265625000e+03 2.000000000000000000e+00 2.198315277099609375e+02
0.000000000000000000e+00 3.966692307692306940e+02 2.454912567138671875e+02 -7.588195800781250000e+00 9.549283981323242188e-01 0.000000000000000000e+00 1.133161132812500000e+03 1.000000000000000000e+00 1.452139404296875000e+03
4.200000000000000000e+01 4.172538461538460410e+02 2.203989410400390625e+02 -5.537536621093750000e+00 2.686335146427154541e-01 5.294117927551269531e-01 1.298789428710937500e+03 3.000000000000000000e+00 3.380776977539062500e+02
0.000000000000000000e+00 1.670538461538461661e+02 1.332410888671875000e+02 -1.200152587890625000e+01 9.986914992332458496e-01 0.000000000000000000e+00 5.574725341796875000e+02 1.000000000000000000e+00 4.792493286132812500e+02
0.000000000000000000e+00 3.058846153846154721e+02 1.474654998779296875e+02 2.057037353515625000e+00 0.000000000000000000e+00 0.000000000000000000e+00 2.714777832031250000e+03 1.000000000000000000e+00 6.877773437500000000e+02
7.300000000000000000e+01 1.214476923076922958e+03 5.099122924804687500e+02 4.422302246093750000e-01 0.000000000000000000e+00 0.000000000000000000e+00 2.350930908203125000e+03 4.000000000000000000e+00 4.123943786621093750e+02
3.600000000000000000e+01 9.059923076923080316e+02 4.660487060546875000e+02 -7.882080078125000000e-01 0.000000000000000000e+00 2.941176593303680420e-01 2.205148437500000000e+03 3.000000000000000000e+00 4.052286682128906250e+02
4.000000000000000000e+01 4.811692307692309214e+02 1.676094818115234375e+02 -6.992950439453125000e+00 2.316414117813110352e-01 8.235294222831726074e-01 8.440927734375000000e+02 3.000000000000000000e+00 8.184263916015625000e+02
1.000000000000000000e+00 1.053876923076923049e+03 4.847567443847656250e+02 -2.673156738281250000e+00 9.999999776482582092e-03 2.352941185235977173e-01 9.355646972656250000e+02 1.000000000000000000e+00 1.228428588867187500e+03
1.100000000000000000e+01 6.048692307692306258e+02 1.930448913574218750e+02 -4.704071044921875000e+00 3.695424795150756836e-01 2.352941185235977173e-01 1.624657470703125000e+03 2.000000000000000000e+00 1.291354980468750000e+02
3.400000000000000000e+01 4.572076923076923549e+02 2.676405334472656250e+02 -4.555084228515625000e+00 1.843313723802566528e-01 2.352941185235977173e-01 1.442382812500000000e+03 3.000000000000000000e+00 1.588960742950439453e+01
7.000000000000000000e+00 4.269615384615383959e+02 2.490313568115234375e+02 -8.776855468750000000e+00 9.064697623252868652e-01 0.000000000000000000e+00 9.200130004882812500e+02 1.000000000000000000e+00 1.648475952148437500e+03
0.000000000000000000e+00 1.984538461538460865e+02 1.578600921630859375e+02 -9.426818847656250000e+00 9.423202276229858398e-01 0.000000000000000000e+00 5.658349609375000000e+02 1.000000000000000000e+00 1.616612091064453125e+02
0.000000000000000000e+00 7.375384615384618314e+01 1.346265411376953125e+02 -1.175970458984375000e+01 9.824177622795104980e-01 5.882353186607360840e-01 9.851271972656250000e+02 1.000000000000000000e+00 4.750887756347656250e+02
9.000000000000000000e+00 1.251692307692307935e+02 1.163100891113281250e+02 -1.105126953125000000e+01 9.915315508842468262e-01 0.000000000000000000e+00 6.697843627929687500e+02 1.000000000000000000e+00 2.430626869201660156e+01
3.000000000000000000e+00 2.467923076923077019e+02 1.835402069091796875e+02 -1.492944335937500000e+01 9.998372197151184082e-01 0.000000000000000000e+00 6.178771362304687500e+02 1.000000000000000000e+00 1.877382965087890625e+02
8.000000000000000000e+00 3.675692307692306144e+02 2.091330718994140625e+02 -9.485992431640625000e+00 7.624043226242065430e-01 2.941176593303680420e-01 8.010906982421875000e+02 1.000000000000000000e+00 1.352885864257812500e+03
0.000000000000000000e+00 1.909307692307693856e+02 1.498984832763671875e+02 -1.202325439453125000e+01 9.722321629524230957e-01 0.000000000000000000e+00 8.453916015625000000e+02 1.000000000000000000e+00 3.586343994140625000e+02
5.000000000000000000e+01 4.750923076923075428e+02 3.047914123535156250e+02 -2.277740478515625000e+00 9.999999776482582092e-03 5.882353186607360840e-01 2.149018066406250000e+03 4.000000000000000000e+00 4.757207641601562500e+02
3.000000000000000000e+00 5.027923076923076451e+02 3.186157531738281250e+02 -9.436187744140625000e+00 9.316000938415527344e-01 0.000000000000000000e+00 8.868742675781250000e+02 1.000000000000000000e+00 1.537046661376953125e+02
5.900000000000000000e+01 5.065076923076925937e+02 2.774731750488281250e+02 -1.498809814453125000e+00 1.406033337116241455e-01 2.352941185235977173e-01 1.372935668945312500e+03 4.000000000000000000e+00 1.782346801757812500e+03
4.000000000000000000e+00 3.402846153846156767e+02 2.012303466796875000e+02 2.941223144531250000e+00 0.000000000000000000e+00 5.882352963089942932e-02 2.914902832031250000e+03 1.000000000000000000e+00 7.150734863281250000e+02
6.300000000000000000e+01 5.935923076923073722e+02 2.518395233154296875e+02 -1.733520507812500000e+00 9.999999776482582092e-03 0.000000000000000000e+00 1.397475341796875000e+03 4.000000000000000000e+00 1.355512939453125000e+03
1.200000000000000000e+01 2.883230769230769397e+02 1.849199676513671875e+02 -1.145104980468750000e+01 9.960948824882507324e-01 0.000000000000000000e+00 9.328939208984375000e+02 2.000000000000000000e+00 1.471863250732421875e+02
1.200000000000000000e+01 4.914076923076924004e+02 2.282527465820312500e+02 -8.934967041015625000e+00 6.290996670722961426e-01 0.000000000000000000e+00 8.266658935546875000e+02 2.000000000000000000e+00 1.454260864257812500e+03
8.000000000000000000e+00 1.199792307692308441e+03 4.217380065917968750e+02 -8.284790039062500000e+00 1.308514922857284546e-01 0.000000000000000000e+00 1.198672790527343750e+02 1.000000000000000000e+00 2.232490081787109375e+02
1.700000000000000000e+01 4.883384615384615017e+02 3.294394226074218750e+02 -7.206817626953125000e+00 7.955338954925537109e-01 0.000000000000000000e+00 1.391135498046875000e+03 2.000000000000000000e+00 2.371748046875000000e+02
3.200000000000000000e+01 4.355923076923076565e+02 2.289242401123046875e+02 -1.155700683593750000e+00 9.999999776482582092e-03 3.529411852359771729e-01 1.976257812500000000e+03 3.000000000000000000e+00 7.299092407226562500e+02
5.700000000000000000e+01 4.060076923076923094e+02 1.803507690429687500e+02 -3.521118164062500000e+00 2.615900337696075439e-01 0.000000000000000000e+00 1.765155273437500000e+03 4.000000000000000000e+00 5.728925781250000000e+02
3.400000000000000000e+01 5.690769230769235492e+02 2.880419921875000000e+02 3.683471679687500000e-02 0.000000000000000000e+00 0.000000000000000000e+00 2.583526367187500000e+03 3.000000000000000000e+00 2.873534240722656250e+02
4.000000000000000000e+01 1.146369230769231081e+03 5.392594604492187500e+02 -1.815032958984375000e+00 1.723193824291229248e-01 0.000000000000000000e+00 1.466481445312500000e+03 3.000000000000000000e+00 4.635406188964843750e+02
2.300000000000000000e+01 3.178384615384615017e+02 1.680847015380859375e+02 -8.754394531250000000e+00 4.742955267429351807e-01 0.000000000000000000e+00 1.129981689453125000e+03 3.000000000000000000e+00 2.328598480224609375e+02
6.000000000000000000e+01 1.128153846153846644e+03 5.210023193359375000e+02 2.014862060546875000e+00 0.000000000000000000e+00 0.000000000000000000e+00 2.510943115234375000e+03 4.000000000000000000e+00 2.675225219726562500e+02
1.000000000000000000e+00 1.854692307692307622e+02 1.312469940185546875e+02 -1.023370361328125000e+01 9.869556427001953125e-01 0.000000000000000000e+00 8.018461914062500000e+02 1.000000000000000000e+00 3.225620422363281250e+02
4.200000000000000000e+01 1.231400000000000091e+03 5.112060852050781250e+02 1.530609130859375000e+00 0.000000000000000000e+00 0.000000000000000000e+00 2.592951171875000000e+03 3.000000000000000000e+00 3.545072631835937500e+02
1.000000000000000000e+00 3.770461538461537430e+02 1.949505615234375000e+02 2.716156005859375000e+00 0.000000000000000000e+00 0.000000000000000000e+00 3.028343750000000000e+03 1.000000000000000000e+00 8.517586669921875000e+02
3.700000000000000000e+01 6.576769230769230035e+02 3.429832763671875000e+02 -2.620422363281250000e+00 1.841678470373153687e-01 0.000000000000000000e+00 1.432024658203125000e+03 3.000000000000000000e+00 1.380773071289062500e+03
2.800000000000000000e+01 3.379615384615383959e+02 1.978224029541015625e+02 -9.318817138671875000e+00 9.290414452552795410e-01 8.235294222831726074e-01 7.953244628906250000e+02 3.000000000000000000e+00 1.395284790039062500e+03
2.900000000000000000e+01 4.309384615384612971e+02 2.114120178222656250e+02 -1.453613281250000000e+00 0.000000000000000000e+00 0.000000000000000000e+00 2.166228271484375000e+03 3.000000000000000000e+00 4.784439697265625000e+02
3.300000000000000000e+01 4.465230769230769283e+02 2.509973297119140625e+02 -5.963836669921875000e+00 2.905060648918151855e-01 2.941176593303680420e-01 7.911646118164062500e+02 3.000000000000000000e+00 1.539390747070312500e+03
3.400000000000000000e+01 4.044923076923075200e+02 2.049480438232421875e+02 -6.776123046875000000e-01 0.000000000000000000e+00 8.235294222831726074e-01 2.371646240234375000e+03 3.000000000000000000e+00 6.540908813476562500e+02
4.700000000000000000e+01 1.378230769230768544e+02 1.854637756347656250e+02 -7.645568847656250000e+00 6.459355354309082031e-01 8.823529481887817383e-01 1.171497070312500000e+03 4.000000000000000000e+00 7.028499145507812500e+02
4.200000000000000000e+01 4.567461538461536179e+02 2.208383636474609375e+02 -2.990264892578125000e+00 9.999999776482582092e-03 7.058823704719543457e-01 2.037038330078125000e+03 3.000000000000000000e+00 4.350022583007812500e+02
6.900000000000000000e+01 4.750307692307692946e+02 2.726172790527343750e+02 -4.432037353515625000e+00 2.399034351110458374e-01 2.941176593303680420e-01 9.279477539062500000e+02 4.000000000000000000e+00 1.421639526367187500e+03
1.500000000000000000e+01 1.308384615384615017e+02 1.265784301757812500e+02 -8.599884033203125000e+00 5.709570646286010742e-01 8.823529481887817383e-01 1.229805541992187500e+03 2.000000000000000000e+00 2.439148712158203125e+02
1.800000000000000000e+01 3.228769230769230489e+02 1.802837829589843750e+02 -7.571044921875000000e+00 1.878361850976943970e-01 8.235294222831726074e-01 8.086562500000000000e+02 2.000000000000000000e+00 6.127371215820312500e+02
7.400000000000000000e+01 2.516523076923076587e+03 5.947929077148437500e+02 6.210510253906250000e+00 0.000000000000000000e+00 0.000000000000000000e+00 2.736303466796875000e+03 4.000000000000000000e+00 5.131040649414062500e+02
0.000000000000000000e+00 1.773769230769230774e+02 2.093481140136718750e+02 -1.318585205078125000e+01 9.968277215957641602e-01 0.000000000000000000e+00 6.613500366210937500e+02 1.000000000000000000e+00 6.349046707153320312e+01
9.000000000000000000e+00 1.417769230769230262e+02 1.315944824218750000e+02 -7.514831542968750000e+00 5.317062139511108398e-01 9.411764740943908691e-01 1.281554321289062500e+03 1.000000000000000000e+00 3.198985595703125000e+02
4.000000000000000000e+01 1.206023076923076360e+03 4.939739379882812500e+02 1.243988037109375000e+00 0.000000000000000000e+00 0.000000000000000000e+00 2.555094726562500000e+03 3.000000000000000000e+00 1.703232879638671875e+02
5.400000000000000000e+01 3.627076923076922981e+02 1.806602630615234375e+02 -3.910919189453125000e+00 1.731022000312805176e-01 0.000000000000000000e+00 1.801394042968750000e+03 4.000000000000000000e+00 2.159613952636718750e+02
0.000000000000000000e+00 2.571999999999999318e+02 1.948955841064453125e+02 -1.275683593750000000e+01 9.992298483848571777e-01 0.000000000000000000e+00 5.043925170898437500e+02 1.000000000000000000e+00 3.049096107482910156e+01
1.000000000000000000e+00 3.728615384615385437e+02 1.421646423339843750e+02 3.511627197265625000e+00 0.000000000000000000e+00 7.058823704719543457e-01 3.187475097656250000e+03 1.000000000000000000e+00 7.066214599609375000e+02
1.000000000000000000e+01 3.144384615384616382e+02 1.590647583007812500e+02 -6.012084960937500000e+00 4.839381575584411621e-01 0.000000000000000000e+00 1.334718139648437500e+03 2.000000000000000000e+00 2.514523315429687500e+02
6.300000000000000000e+01 9.464384615384610697e+02 5.032089233398437500e+02 1.881103515625000000e+00 0.000000000000000000e+00 0.000000000000000000e+00 2.577852539062500000e+03 4.000000000000000000e+00 3.250304870605468750e+02
6.100000000000000000e+01 1.971315384615385028e+03 6.710748291015625000e+02 3.878021240234375000e+00 0.000000000000000000e+00 4.705882370471954346e-01 1.989634399414062500e+03 4.000000000000000000e+00 1.709184265136718750e+02
4.000000000000000000e+00 2.850000000000000568e+02 1.799762115478515625e+02 -7.679809570312500000e+00 6.499949693679809570e-01 5.882352963089942932e-02 1.178919921875000000e+03 1.000000000000000000e+00 1.003724746704101562e+02
6.000000000000000000e+01 1.068992307692308032e+03 5.042595520019531250e+02 2.120971679687500000e-01 0.000000000000000000e+00 0.000000000000000000e+00 2.334805175781250000e+03 4.000000000000000000e+00 4.391430358886718750e+02
6.200000000000000000e+01 4.396153846153846985e+02 1.621161346435546875e+02 -6.953277587890625000e+00 3.406750857830047607e-01 8.235294222831726074e-01 8.634495849609375000e+02 4.000000000000000000e+00 9.697003173828125000e+02
0.000000000000000000e+00 2.402846153846153641e+02 1.602024230957031250e+02 -1.348315429687500000e+01 9.993658065795898438e-01 0.000000000000000000e+00 8.188098754882812500e+02 1.000000000000000000e+00 1.338715820312500000e+02
1.600000000000000000e+01 5.411846153846151992e+02 2.945973205566406250e+02 -2.071533203125000000e+00 0.000000000000000000e+00 0.000000000000000000e+00 1.324967285156250000e+03 2.000000000000000000e+00 3.071163558959960938e+01
0.000000000000000000e+00 1.961692307692307509e+02 1.750405273437500000e+02 -1.319955444335937500e+01 9.958638548851013184e-01 0.000000000000000000e+00 7.623820190429687500e+02 1.000000000000000000e+00 8.382205200195312500e+01
0.000000000000000000e+00 1.900000000000000000e+02 8.327503967285156250e+01 -1.300595092773437500e+01 9.984892010688781738e-01 0.000000000000000000e+00 8.192905273437500000e+02 1.000000000000000000e+00 3.075087280273437500e+02
0.000000000000000000e+00 2.256692307692307793e+02 1.616078186035156250e+02 -1.181167602539062500e+01 9.973181486129760742e-01 0.000000000000000000e+00 8.990242919921875000e+02 1.000000000000000000e+00 5.139483642578125000e+02
1.500000000000000000e+01 3.676538461538462457e+02 2.487026977539062500e+02 -8.914703369140625000e+00 9.196573495864868164e-01 0.000000000000000000e+00 1.170784423828125000e+03 2.000000000000000000e+00 2.786199645996093750e+02
4.400000000000000000e+01 2.004923076923077758e+02 4.587396621704101562e+01 -7.403564453125000000e+00 2.031041085720062256e-01 5.882353186607360840e-01 8.653506469726562500e+02 3.000000000000000000e+00 6.056194458007812500e+02
0.000000000000000000e+00 3.684384615384615245e+02 2.578114624023437500e+02 -1.109750366210937500e+01 9.916725754737854004e-01 0.000000000000000000e+00 2.925934448242187500e+02 1.000000000000000000e+00 1.234257984161376953e+01
6.000000000000000000e+00 2.399307692307692150e+02 2.094157867431640625e+02 -9.688232421875000000e+00 9.681661725044250488e-01 0.000000000000000000e+00 1.088554931640625000e+03 1.000000000000000000e+00 4.579952087402343750e+02
0.000000000000000000e+00 2.572846153846154493e+02 2.054139404296875000e+02 -1.029150390625000000e+01 9.709905982017517090e-01 0.000000000000000000e+00 9.771458129882812500e+02 1.000000000000000000e+00 3.706684265136718750e+02
7.000000000000000000e+00 4.653384615384613880e+02 2.782657165527343750e+02 -1.045928955078125000e+01 9.662824869155883789e-01 0.000000000000000000e+00 6.842470092773437500e+02 1.000000000000000000e+00 5.416944885253906250e+01
6.900000000000000000e+01 1.145384615384616154e+03 5.053868713378906250e+02 -1.182556152343750000e+00 0.000000000000000000e+00 0.000000000000000000e+00 2.004996337890625000e+03 4.000000000000000000e+00 1.136120605468750000e+02
4.000000000000000000e+00 5.512769230769230262e+02 3.198932495117187500e+02 -4.593078613281250000e+00 6.853703260421752930e-01 0.000000000000000000e+00 1.159463745117187500e+03 1.000000000000000000e+00 1.664343994140625000e+03
2.000000000000000000e+00 3.193076923076924345e+02 1.708006439208984375e+02 4.359191894531250000e+00 0.000000000000000000e+00 0.000000000000000000e+00 3.194289550781250000e+03 1.000000000000000000e+00 8.615532836914062500e+02
0.000000000000000000e+00 2.501230769230768374e+02 1.931993560791015625e+02 -1.313977050781250000e+01 9.993268251419067383e-01 0.000000000000000000e+00 4.195221862792968750e+02 1.000000000000000000e+00 5.979572296142578125e+01
5.000000000000000000e+00 3.159153846153845961e+02 2.368283996582031250e+02 -1.038470458984375000e+01 9.649791121482849121e-01 0.000000000000000000e+00 1.045398315429687500e+03 1.000000000000000000e+00 3.626996459960937500e+02
5.000000000000000000e+00 3.212615384615385210e+02 1.234337463378906250e+02 1.646820068359375000e+00 0.000000000000000000e+00 0.000000000000000000e+00 2.568379150390625000e+03 1.000000000000000000e+00 7.534255981445312500e+02
3.400000000000000000e+01 7.253153846153844597e+02 3.843352966308593750e+02 -4.610809326171875000e+00 3.194294273853302002e-01 0.000000000000000000e+00 1.527248168945312500e+03 3.000000000000000000e+00 1.874211120605468750e+02
0.000000000000000000e+00 1.978846153846153868e+02 1.500166015625000000e+02 -9.758087158203125000e+00 9.800527691841125488e-01 0.000000000000000000e+00 9.472116088867187500e+02 1.000000000000000000e+00 3.571432495117187500e+02
1.500000000000000000e+01 8.131307692307693742e+02 4.132931518554687500e+02 -8.346527099609375000e+00 1.729847192764282227e-01 0.000000000000000000e+00 2.030493316650390625e+02 2.000000000000000000e+00 5.205593872070312500e+02
1.000000000000000000e+00 5.070769230769232081e+02 3.535330200195312500e+02 -8.508666992187500000e+00 9.129576086997985840e-01 0.000000000000000000e+00 9.470072631835937500e+02 1.000000000000000000e+00 1.094699630737304688e+02
4.500000000000000000e+01 4.521384615384612289e+02 1.493661804199218750e+02 -6.141662597656250000e-01 0.000000000000000000e+00 0.000000000000000000e+00 2.217759277343750000e+03 4.000000000000000000e+00 5.500814819335937500e+02
2.000000000000000000e+00 2.194076923076924004e+02 2.533506317138671875e+02 -6.635833740234375000e+00 6.104238033294677734e-01 0.000000000000000000e+00 9.823359985351562500e+02 1.000000000000000000e+00 1.017329650878906250e+03
4.700000000000000000e+01 5.777076923076922412e+02 2.419716339111328125e+02 -1.194641113281250000e+00 0.000000000000000000e+00 0.000000000000000000e+00 1.727064941406250000e+03 4.000000000000000000e+00 9.987631835937500000e+02
0.000000000000000000e+00 1.425999999999999943e+02 1.444092559814453125e+02 -1.160699462890625000e+01 9.914598464965820312e-01 0.000000000000000000e+00 7.852755737304687500e+02 1.000000000000000000e+00 2.687390441894531250e+02
0.000000000000000000e+00 1.489461538461539192e+02 1.511671447753906250e+02 -1.120648193359375000e+01 9.687030315399169922e-01 0.000000000000000000e+00 6.867966308593750000e+02 1.000000000000000000e+00 2.221734466552734375e+02
1.700000000000000000e+01 6.634384615384612971e+02 3.864309387207031250e+02 -3.718536376953125000e+00 2.850493788719177246e-01 2.941176593303680420e-01 1.640227050781250000e+03 2.000000000000000000e+00 6.589205932617187500e+01
7.000000000000000000e+00 3.025692307692307281e+02 1.935520172119140625e+02 -6.018463134765625000e+00 5.873723626136779785e-01 5.294117927551269531e-01 1.533826293945312500e+03 1.000000000000000000e+00 3.323628845214843750e+02
7.300000000000000000e+01 1.163338461538461161e+03 4.133062133789062500e+02 -4.286499023437500000e-01 0.000000000000000000e+00 2.352941185235977173e-01 1.842004882812500000e+03 4.000000000000000000e+00 1.245673461914062500e+03
2.000000000000000000e+00 2.447307692307692548e+02 1.604579315185546875e+02 -1.190493774414062500e+01 9.931696653366088867e-01 0.000000000000000000e+00 8.934962158203125000e+02 1.000000000000000000e+00 1.612801208496093750e+02
4.000000000000000000e+00 1.995076923076923379e+02 1.792089843750000000e+02 -1.022396850585937500e+01 9.815249443054199219e-01 0.000000000000000000e+00 8.459376831054687500e+02 1.000000000000000000e+00 3.526790771484375000e+02
6.000000000000000000e+01 6.858384615384612744e+02 4.111935119628906250e+02 -2.007812500000000000e+00 0.000000000000000000e+00 0.000000000000000000e+00 2.122462890625000000e+03 4.000000000000000000e+00 1.116545715332031250e+02
1.000000000000000000e+00 2.470384615384615472e+02 2.093249359130859375e+02 -9.290832519531250000e+00 9.497891664505004883e-01 0.000000000000000000e+00 1.149256713867187500e+03 1.000000000000000000e+00 4.201718750000000000e+02
5.000000000000000000e+01 1.289930769230769783e+03 4.446097412109375000e+02 3.089630126953125000e+00 0.000000000000000000e+00 0.000000000000000000e+00 2.680614990234375000e+03 4.000000000000000000e+00 6.647561645507812500e+01
6.200000000000000000e+01 1.018653846153845961e+03 5.001443786621093750e+02 2.310668945312500000e+00 0.000000000000000000e+00 0.000000000000000000e+00 2.579305664062500000e+03 4.000000000000000000e+00 2.293017120361328125e+02
5.900000000000000000e+01 4.596538461538460183e+02 1.910309753417968750e+02 -4.659118652343750000e-01 0.000000000000000000e+00 0.000000000000000000e+00 2.186603515625000000e+03 4.000000000000000000e+00 5.956694335937500000e+02
4.700000000000000000e+01 1.025538461538461434e+03 5.741204833984375000e+02 -1.712432861328125000e+00 0.000000000000000000e+00 2.352941185235977173e-01 1.038591918945312500e+03 4.000000000000000000e+00 1.161499389648437500e+03
2.000000000000000000e+01 1.396123076923076496e+03 5.737103881835937500e+02 3.868560791015625000e+00 0.000000000000000000e+00 0.000000000000000000e+00 2.251631591796875000e+03 3.000000000000000000e+00 2.352932434082031250e+02
6.300000000000000000e+01 1.173169230769230353e+03 5.426690673828125000e+02 -1.078857421875000000e+00 1.093920990824699402e-01 0.000000000000000000e+00 1.515560424804687500e+03 4.000000000000000000e+00 3.679127197265625000e+02
2.000000000000000000e+00 2.194076923076924004e+02 2.533506317138671875e+02 -6.635833740234375000e+00 6.104238033294677734e-01 0.000000000000000000e+00 9.823359985351562500e+02 1.000000000000000000e+00 1.017329650878906250e+03
0.000000000000000000e+00 2.161461538461538225e+02 1.085718231201171875e+02 -1.238449096679687500e+01 9.975000023841857910e-01 0.000000000000000000e+00 8.768683471679687500e+02 1.000000000000000000e+00 5.173108520507812500e+02
4.100000000000000000e+01 8.124769230769229580e+02 4.377636108398437500e+02 -2.055480957031250000e+00 9.999999776482582092e-03 0.000000000000000000e+00 2.026786865234375000e+03 3.000000000000000000e+00 2.616852416992187500e+02
1.700000000000000000e+01 2.919076923076923435e+02 1.761187438964843750e+02 -7.113494873046875000e+00 7.710657715797424316e-01 0.000000000000000000e+00 1.381531127929687500e+03 2.000000000000000000e+00 3.175956420898437500e+02
3.100000000000000000e+01 9.129999999999998295e+01 1.444630584716796875e+02 -1.062991333007812500e+01 8.737663626670837402e-01 4.705882370471954346e-01 1.129612670898437500e+03 3.000000000000000000e+00 3.482047729492187500e+02
0.000000000000000000e+00 1.925692307692307850e+02 1.241862182617187500e+02 -9.557647705078125000e+00 9.742631912231445312e-01 0.000000000000000000e+00 1.109948364257812500e+03 1.000000000000000000e+00 3.397850952148437500e+02
2.800000000000000000e+01 3.833307692307693060e+02 1.954491271972656250e+02 -6.456054687500000000e+00 5.578856468200683594e-01 0.000000000000000000e+00 1.331998779296875000e+03 3.000000000000000000e+00 6.332896118164062500e+02
1.000000000000000000e+00 4.923461538461536975e+02 1.466992645263671875e+02 -1.051556396484375000e+01 9.873582124710083008e-01 0.000000000000000000e+00 6.934968261718750000e+02 1.000000000000000000e+00 3.795080261230468750e+02
3.000000000000000000e+00 4.611769230769228898e+02 1.357772216796875000e+02 -9.096099853515625000e+00 9.535489678382873535e-01 0.000000000000000000e+00 4.727555541992187500e+02 1.000000000000000000e+00 2.839769897460937500e+02
2.000000000000000000e+00 7.948307692307693060e+02 4.260511474609375000e+02 -5.806671142578125000e+00 7.557671666145324707e-01 0.000000000000000000e+00 9.297231445312500000e+02 1.000000000000000000e+00 5.558328247070312500e+02
2.000000000000000000e+01 8.953153846153844597e+02 4.020271301269531250e+02 -5.494659423828125000e+00 4.076239168643951416e-01 0.000000000000000000e+00 1.244936279296875000e+03 3.000000000000000000e+00 4.032789306640625000e+02
4.000000000000000000e+01 4.020461538461540272e+02 2.110450134277343750e+02 -2.284271240234375000e+00 9.999999776482582092e-03 5.294117927551269531e-01 2.056356445312500000e+03 3.000000000000000000e+00 3.522243041992187500e+02
7.000000000000000000e+00 2.704692307692308191e+02 1.846666412353515625e+02 -1.446664428710937500e+01 9.998841881752014160e-01 0.000000000000000000e+00 6.586703491210937500e+02 1.000000000000000000e+00 3.042521667480468750e+02
4.900000000000000000e+01 9.762846153846154493e+02 4.674471740722656250e+02 -3.579467773437500000e+00 3.731388747692108154e-01 5.882353186607360840e-01 1.553112915039062500e+03 4.000000000000000000e+00 7.424209594726562500e+02
6.600000000000000000e+01 3.293076923076923208e+02 1.693789215087890625e+02 -3.784454345703125000e+00 2.190778106451034546e-01 0.000000000000000000e+00 1.928501953125000000e+03 4.000000000000000000e+00 3.126565551757812500e+02
5.100000000000000000e+01 1.195646153846153993e+03 5.082822570800781250e+02 -3.425598144531250000e-01 9.999999776482582092e-03 0.000000000000000000e+00 1.553686279296875000e+03 4.000000000000000000e+00 3.579460144042968750e+02
3.300000000000000000e+01 4.730538461538462229e+02 2.968239135742187500e+02 -5.194335937500000000e+00 3.770907521247863770e-01 7.647058963775634766e-01 1.633955810546875000e+03 3.000000000000000000e+00 4.461995544433593750e+02
5.200000000000000000e+01 5.069384615384615813e+02 2.866053466796875000e+02 -3.327758789062500000e+00 0.000000000000000000e+00 0.000000000000000000e+00 1.157739746093750000e+03 4.000000000000000000e+00 8.985104980468750000e+02
1.000000000000000000e+00 2.336692307692308361e+02 2.199478302001953125e+02 -1.477297973632812500e+01 9.998294115066528320e-01 0.000000000000000000e+00 2.607477722167968750e+02 1.000000000000000000e+00 2.170866088867187500e+02
1.300000000000000000e+01 7.213846153846154721e+02 3.792112121582031250e+02 -6.707916259765625000e+00 6.877024769783020020e-01 0.000000000000000000e+00 1.164362304687500000e+03 2.000000000000000000e+00 3.717596130371093750e+02
6.800000000000000000e+01 1.326584615384615063e+03 5.685342407226562500e+02 3.835418701171875000e+00 0.000000000000000000e+00 0.000000000000000000e+00 2.616437255859375000e+03 4.000000000000000000e+00 1.275015487670898438e+02
4.000000000000000000e+00 1.127307692307692122e+02 1.924306793212890625e+02 -7.858856201171875000e+00 9.647613763809204102e-01 0.000000000000000000e+00 1.181521728515625000e+03 1.000000000000000000e+00 1.136295166015625000e+03
1.000000000000000000e+00 2.643307692307691923e+02 1.899381408691406250e+02 -9.729644775390625000e+00 9.554490447044372559e-01 0.000000000000000000e+00 1.069248046875000000e+03 1.000000000000000000e+00 4.376830749511718750e+02
2.900000000000000000e+01 3.965000000000002842e+02 3.213984069824218750e+02 9.601440429687500000e-01 0.000000000000000000e+00 2.352941185235977173e-01 2.178938232421875000e+03 3.000000000000000000e+00 1.409171508789062500e+03
3.400000000000000000e+01 1.204330769230769647e+03 5.278962402343750000e+02 1.045867919921875000e+00 0.000000000000000000e+00 0.000000000000000000e+00 2.289110107421875000e+03 3.000000000000000000e+00 5.199870605468750000e+02
2.900000000000000000e+01 5.659307692307692150e+02 2.872439575195312500e+02 -6.092346191406250000e+00 5.674048662185668945e-01 4.705882370471954346e-01 1.578796875000000000e+03 3.000000000000000000e+00 1.326187896728515625e+02
4.400000000000000000e+01 8.315923076923073722e+02 4.094239501953125000e+02 3.656311035156250000e-01 0.000000000000000000e+00 6.470588445663452148e-01 2.380763183593750000e+03 3.000000000000000000e+00 3.400563964843750000e+02
2.000000000000000000e+01 5.440692307692310123e+02 1.370878601074218750e+02 -3.955383300781250000e-01 0.000000000000000000e+00 0.000000000000000000e+00 2.481371826171875000e+03 3.000000000000000000e+00 2.604508972167968750e+02
2.100000000000000000e+01 1.118661538461538157e+03 5.634777221679687500e+02 -1.080322265625000000e+00 9.999999776482582092e-03 0.000000000000000000e+00 1.456015502929687500e+03 3.000000000000000000e+00 1.431709442138671875e+02
2.100000000000000000e+01 7.738384615384615017e+02 4.402812194824218750e+02 -6.746307373046875000e+00 6.849215030670166016e-01 0.000000000000000000e+00 1.094625366210937500e+03 3.000000000000000000e+00 4.476566467285156250e+02
3.100000000000000000e+01 9.129999999999998295e+01 1.444630584716796875e+02 -1.062991333007812500e+01 8.737663626670837402e-01 4.705882370471954346e-01 1.129612670898437500e+03 3.000000000000000000e+00 3.482047729492187500e+02
6.100000000000000000e+01 8.854076923076926278e+02 4.042376708984375000e+02 4.693908691406250000e-01 0.000000000000000000e+00 0.000000000000000000e+00 2.460059814453125000e+03 4.000000000000000000e+00 3.883303222656250000e+02
0.000000000000000000e+00 2.462615384615384357e+02 1.810586242675781250e+02 -1.670132446289062500e+01 9.999887943267822266e-01 0.000000000000000000e+00 5.387799682617187500e+02 1.000000000000000000e+00 3.881537780761718750e+02
5.600000000000000000e+01 8.055461538461532882e+02 4.675172424316406250e+02 4.617736816406250000e+00 0.000000000000000000e+00 0.000000000000000000e+00 2.637604248046875000e+03 4.000000000000000000e+00 2.208110504150390625e+02
0.000000000000000000e+00 2.316461538461538794e+02 1.564904174804687500e+02 -1.197445678710937500e+01 9.961214661598205566e-01 0.000000000000000000e+00 8.604791259765625000e+02 1.000000000000000000e+00 2.442138977050781250e+02
6.400000000000000000e+01 4.371846153846153129e+02 2.065232849121093750e+02 -1.902709960937500000e+00 0.000000000000000000e+00 4.705882370471954346e-01 2.124917724609375000e+03 4.000000000000000000e+00 3.916175842285156250e+02
0.000000000000000000e+00 1.579000000000000341e+02 1.708697814941406250e+02 -1.393759155273437500e+01 9.997548460960388184e-01 0.000000000000000000e+00 6.958087768554687500e+02 1.000000000000000000e+00 8.034126281738281250e+01
2.700000000000000000e+01 3.109692307692307054e+02 1.727658996582031250e+02 -6.769897460937500000e+00 5.903730392456054688e-01 5.294117927551269531e-01 1.399521118164062500e+03 3.000000000000000000e+00 3.027715759277343750e+02
7.000000000000000000e+00 6.581692307692306940e+02 3.965635375976562500e+02 -2.464294433593750000e+00 9.999999776482582092e-03 0.000000000000000000e+00 2.052369628906250000e+03 1.000000000000000000e+00 9.158667755126953125e+01
1.400000000000000000e+01 2.808999999999999773e+02 1.589795532226562500e+02 -8.017791748046875000e+00 6.851074695587158203e-01 0.000000000000000000e+00 1.102366088867187500e+03 2.000000000000000000e+00 2.085797729492187500e+02
0.000000000000000000e+00 3.293923076923080089e+02 1.409511108398437500e+02 4.958221435546875000e+00 0.000000000000000000e+00 0.000000000000000000e+00 3.409952392578125000e+03 1.000000000000000000e+00 8.735794677734375000e+02
0.000000000000000000e+00 1.949923076923076906e+02 1.055132369995117188e+02 -1.297311401367187500e+01 9.984064102172851562e-01 0.000000000000000000e+00 8.064248046875000000e+02 1.000000000000000000e+00 1.879975433349609375e+02
6.000000000000000000e+00 3.611846153846153697e+02 2.068322753906250000e+02 1.883361816406250000e+00 0.000000000000000000e+00 2.941176593303680420e-01 2.510086181640625000e+03 1.000000000000000000e+00 1.291713134765625000e+03
7.200000000000000000e+01 7.360615384615387029e+02 4.622426452636718750e+02 -3.988861083984375000e+00 0.000000000000000000e+00 0.000000000000000000e+00 8.623231811523437500e+02 4.000000000000000000e+00 4.311364440917968750e+02
5.900000000000000000e+01 8.178076923076924913e+02 2.961388244628906250e+02 1.532318115234375000e+00 0.000000000000000000e+00 2.941176593303680420e-01 2.719706054687500000e+03 4.000000000000000000e+00 4.447554626464843750e+02
2.700000000000000000e+01 3.467538461538459842e+02 1.680273437500000000e+02 -8.409637451171875000e+00 6.451883912086486816e-01 0.000000000000000000e+00 7.824223022460937500e+02 3.000000000000000000e+00 1.225750366210937500e+03
7.000000000000000000e+00 2.478692307692307963e+02 1.879960174560546875e+02 -9.501831054687500000e+00 9.619381427764892578e-01 0.000000000000000000e+00 1.127352050781250000e+03 1.000000000000000000e+00 5.002391357421875000e+02
7.000000000000000000e+00 5.523846153846159268e+02 1.787323913574218750e+02 -3.271484375000000000e-02 0.000000000000000000e+00 0.000000000000000000e+00 2.566132568359375000e+03 1.000000000000000000e+00 4.875391540527343750e+02
2.000000000000000000e+00 2.721076923076922185e+02 2.095241851806640625e+02 -1.395227050781250000e+01 9.998626112937927246e-01 0.000000000000000000e+00 3.766265869140625000e+02 1.000000000000000000e+00 1.527520599365234375e+02
2.700000000000000000e+01 3.594000000000000341e+02 1.871432342529296875e+02 -5.724029541015625000e+00 3.795661330223083496e-01 0.000000000000000000e+00 1.489466552734375000e+03 3.000000000000000000e+00 2.976866760253906250e+02
1.400000000000000000e+01 7.425538461538459387e+02 3.733916015625000000e+02 -6.118072509765625000e+00 5.971797704696655273e-01 2.352941185235977173e-01 1.258540771484375000e+03 2.000000000000000000e+00 4.019642333984375000e+02
2.300000000000000000e+01 4.497384615384616495e+02 1.929122772216796875e+02 -5.595886230468750000e+00 7.329802513122558594e-01 0.000000000000000000e+00 1.314181030273437500e+03 3.000000000000000000e+00 1.046514282226562500e+03
6.700000000000000000e+01 7.077153846153844370e+02 4.012797546386718750e+02 -1.351593017578125000e+00 0.000000000000000000e+00 0.000000000000000000e+00 2.192258544921875000e+03 4.000000000000000000e+00 1.768047943115234375e+02
1.900000000000000000e+01 2.289230769230769624e+02 1.852178039550781250e+02 -9.383972167968750000e+00 7.385788559913635254e-01 0.000000000000000000e+00 1.056635864257812500e+03 2.000000000000000000e+00 5.668601684570312500e+02
0.000000000000000000e+00 2.306461538461538794e+02 1.075243072509765625e+02 -1.206051635742187500e+01 9.942177534103393555e-01 0.000000000000000000e+00 8.891165161132812500e+02 1.000000000000000000e+00 4.292476806640625000e+02
5.000000000000000000e+01 4.007230769230769170e+02 1.918876953125000000e+02 -3.489044189453125000e+00 1.339871734380722046e-01 5.882353186607360840e-01 1.908430419921875000e+03 4.000000000000000000e+00 3.346384277343750000e+02
2.100000000000000000e+01 4.076999999999999318e+02 3.172451782226562500e+02 -8.255615234375000000e+00 8.907337188720703125e-01 0.000000000000000000e+00 1.209805175781250000e+03 3.000000000000000000e+00 1.959218597412109375e+02
1.000000000000000000e+00 2.999384615384614108e+02 2.271737060546875000e+02 -1.072918701171875000e+01 9.901806116104125977e-01 0.000000000000000000e+00 4.669987182617187500e+02 1.000000000000000000e+00 2.786257171630859375e+01
4.600000000000000000e+01 3.747076923076923549e+02 1.808583679199218750e+02 -2.711975097656250000e+00 9.999999776482582092e-03 5.882353186607360840e-01 2.071078369140625000e+03 4.000000000000000000e+00 2.417357482910156250e+02
6.000000000000000000e+01 4.405615384615388166e+02 2.610590209960937500e+02 2.594360351562500000e+00 0.000000000000000000e+00 8.235294222831726074e-01 2.341595458984375000e+03 4.000000000000000000e+00 1.288154907226562500e+03
6.200000000000000000e+01 1.272976923076923867e+03 5.510371093750000000e+02 3.600433349609375000e+00 0.000000000000000000e+00 0.000000000000000000e+00 2.625540771484375000e+03 4.000000000000000000e+00 9.304090881347656250e+01
5.000000000000000000e+01 9.918230769230775650e+02 5.227224121093750000e+02 5.156982421875000000e+00 0.000000000000000000e+00 0.000000000000000000e+00 2.549141357421875000e+03 4.000000000000000000e+00 5.112160110473632812e+01
2.300000000000000000e+01 5.938846153846156994e+02 2.632060852050781250e+02 -3.986175537109375000e+00 2.283959537744522095e-01 5.294117927551269531e-01 1.746767822265625000e+03 3.000000000000000000e+00 1.181062011718750000e+02
1.400000000000000000e+01 3.127769230769230830e+02 1.891778106689453125e+02 -1.068566894531250000e+01 9.851354360580444336e-01 0.000000000000000000e+00 1.011129150390625000e+03 2.000000000000000000e+00 1.516930389404296875e+02
3.800000000000000000e+01 9.721000000000001364e+02 4.896927490234375000e+02 -3.896697998046875000e+00 2.190895080566406250e-01 5.294117927551269531e-01 1.398368286132812500e+03 3.000000000000000000e+00 4.190651245117187500e+02
3.600000000000000000e+01 1.486915384615384937e+03 5.738226928710937500e+02 4.143218994140625000e+00 0.000000000000000000e+00 0.000000000000000000e+00 2.623920898437500000e+03 3.000000000000000000e+00 2.176613922119140625e+02
0.000000000000000000e+00 2.088769230769230489e+02 1.527493743896484375e+02 -9.531921386718750000e+00 9.697287678718566895e-01 0.000000000000000000e+00 9.118135375976562500e+02 1.000000000000000000e+00 3.795775451660156250e+02
2.300000000000000000e+01 1.352461538461537884e+02 1.427292938232421875e+02 -7.082824707031250000e+00 8.770559430122375488e-01 5.882353186607360840e-01 1.173632812500000000e+03 3.000000000000000000e+00 9.633872680664062500e+02
7.000000000000000000e+00 6.464846153846154948e+02 3.652087707519531250e+02 -6.595214843750000000e+00 7.631747722625732422e-01 0.000000000000000000e+00 9.936030883789062500e+02 1.000000000000000000e+00 2.176102294921875000e+02
5.500000000000000000e+01 8.099307692307691013e+02 3.381897583007812500e+02 1.638488769531250000e+00 0.000000000000000000e+00 0.000000000000000000e+00 2.816566406250000000e+03 4.000000000000000000e+00 4.539009399414062500e+02
2.000000000000000000e+00 4.435076923076921389e+02 1.689656524658203125e+02 4.779510498046875000e+00 0.000000000000000000e+00 0.000000000000000000e+00 3.384722900390625000e+03 1.000000000000000000e+00 8.700382690429687500e+02
2.700000000000000000e+01 4.160153846153845052e+02 2.395843353271484375e+02 -3.929351806640625000e+00 2.414403259754180908e-01 1.470588207244873047e+00 1.823611450195312500e+03 3.000000000000000000e+00 4.849678649902343750e+02
3.800000000000000000e+01 3.333999999999999204e+02 1.843434295654296875e+02 -5.150451660156250000e+00 4.275960326194763184e-01 5.882353186607360840e-01 1.660180419921875000e+03 3.000000000000000000e+00 3.068132019042968750e+02
1.800000000000000000e+01 2.128692307692307963e+02 7.629846191406250000e+01 -8.056701660156250000e+00 9.361829161643981934e-01 0.000000000000000000e+00 1.094038574218750000e+03 2.000000000000000000e+00 9.435482788085937500e+02
5.700000000000000000e+01 7.842000000000002728e+02 4.112475891113281250e+02 3.869750976562500000e+00 0.000000000000000000e+00 0.000000000000000000e+00 3.100885253906250000e+03 4.000000000000000000e+00 5.100095520019531250e+02
3.000000000000000000e+00 7.961538461538464162e+02 6.227647094726562500e+02 -3.048828125000000000e+00 2.234651446342468262e-01 0.000000000000000000e+00 8.928980712890625000e+02 1.000000000000000000e+00 1.594329956054687500e+03
4.200000000000000000e+01 1.222330769230769647e+03 4.400264587402343750e+02 2.680175781250000000e+00 0.000000000000000000e+00 0.000000000000000000e+00 2.714061523437500000e+03 3.000000000000000000e+00 5.892361068725585938e+01
1.400000000000000000e+01 1.135146153846153993e+03 3.057758483886718750e+02 9.088439941406250000e-01 5.433080196380615234e-01 5.294117927551269531e-01 1.496613891601562500e+03 2.000000000000000000e+00 1.956757934570312500e+03
6.600000000000000000e+01 4.815846153846154607e+02 4.291376953125000000e+02 -4.707122802734375000e+00 9.999999776482582092e-03 0.000000000000000000e+00 8.136104125976562500e+02 4.000000000000000000e+00 6.390578613281250000e+02
5.100000000000000000e+01 1.090830769230769192e+03 4.280179443359375000e+02 -3.128997802734375000e+00 2.656746506690979004e-01 0.000000000000000000e+00 1.666379028320312500e+03 4.000000000000000000e+00 7.426630249023437500e+02
3.200000000000000000e+01 4.868000000000000682e+02 2.070477905273437500e+02 -2.121246337890625000e+00 0.000000000000000000e+00 5.882353186607360840e-01 2.198961669921875000e+03 3.000000000000000000e+00 2.889776916503906250e+02
0.000000000000000000e+00 2.340153846153845620e+02 2.609177246093750000e+02 -1.459228515625000000e+01 9.999818205833435059e-01 0.000000000000000000e+00 4.771111755371093750e+02 1.000000000000000000e+00 2.641923217773437500e+02
6.000000000000000000e+00 7.215538461538460524e+02 3.735274353027343750e+02 -5.673522949218750000e+00 5.568256378173828125e-01 0.000000000000000000e+00 1.352155639648437500e+03 1.000000000000000000e+00 3.788477478027343750e+02
1.000000000000000000e+01 1.001846153846154408e+02 1.416290740966796875e+02 -1.198422241210937500e+01 9.507796764373779297e-01 0.000000000000000000e+00 1.046650878906250000e+03 2.000000000000000000e+00 6.125390625000000000e+02
0.000000000000000000e+00 1.163923076923076678e+03 3.873300170898437500e+02 -8.303619384765625000e+00 3.935678601264953613e-01 0.000000000000000000e+00 1.598835754394531250e+02 1.000000000000000000e+00 3.557687988281250000e+02
1.200000000000000000e+01 8.828846153846159268e+02 4.801407165527343750e+02 -5.164154052734375000e+00 3.504050374031066895e-01 2.941176593303680420e-01 1.340016723632812500e+03 2.000000000000000000e+00 6.053684082031250000e+02
3.000000000000000000e+01 1.181707692307692014e+03 4.479214782714843750e+02 -5.526733398437500000e-02 9.999999776482582092e-03 0.000000000000000000e+00 1.550068969726562500e+03 3.000000000000000000e+00 2.046462249755859375e+02
1.800000000000000000e+01 1.238500000000000000e+03 5.105239868164062500e+02 6.083374023437500000e-01 0.000000000000000000e+00 0.000000000000000000e+00 2.407076171875000000e+03 2.000000000000000000e+00 2.236500701904296875e+02
0.000000000000000000e+00 1.818307692307691354e+02 9.355770111083984375e+01 -1.219366455078125000e+01 9.850158095359802246e-01 0.000000000000000000e+00 7.914967041015625000e+02 1.000000000000000000e+00 2.498293914794921875e+02
3.000000000000000000e+00 3.313230769230768828e+02 2.103278808593750000e+02 -8.901184082031250000e+00 9.014946818351745605e-01 0.000000000000000000e+00 1.109441162109375000e+03 1.000000000000000000e+00 3.686317138671875000e+02
0.000000000000000000e+00 1.782076923076922981e+02 2.575774230957031250e+02 -1.045816040039062500e+01 9.827400445938110352e-01 0.000000000000000000e+00 4.336747741699218750e+02 1.000000000000000000e+00 2.338177299499511719e+01
3.900000000000000000e+01 1.391384615384614847e+02 1.188527450561523438e+02 -1.063699340820312500e+01 9.638973474502563477e-01 0.000000000000000000e+00 1.054196411132812500e+03 3.000000000000000000e+00 3.824222106933593750e+02
2.400000000000000000e+01 9.250538461538459387e+02 4.286358642578125000e+02 -3.399047851562500000e+00 1.782589107751846313e-01 2.941176593303680420e-01 1.693128906250000000e+03 3.000000000000000000e+00 5.387216186523437500e+02
4.000000000000000000e+00 3.703461538461539817e+02 2.605399475097656250e+02 -5.823089599609375000e+00 5.077559351921081543e-01 2.941176593303680420e-01 1.187377075195312500e+03 1.000000000000000000e+00 2.077812347412109375e+02
2.500000000000000000e+01 7.167384615384618201e+02 3.879168090820312500e+02 -3.818847656250000000e+00 2.937584221363067627e-01 0.000000000000000000e+00 1.662135131835937500e+03 3.000000000000000000e+00 2.129518890380859375e+02
3.700000000000000000e+01 6.571692307692311488e+02 1.724028930664062500e+02 -1.040832519531250000e+00 0.000000000000000000e+00 0.000000000000000000e+00 2.398835937500000000e+03 3.000000000000000000e+00 2.947053222656250000e+02
4.800000000000000000e+01 2.244538461538460865e+02 1.445240783691406250e+02 -8.834197998046875000e+00 9.014828205108642578e-01 8.235294222831726074e-01 8.235372924804687500e+02 4.000000000000000000e+00 1.222819702148437500e+03
3.000000000000000000e+00 3.433000000000001251e+02 1.785722351074218750e+02 4.288085937500000000e+00 0.000000000000000000e+00 5.882353186607360840e-01 3.312505371093750000e+03 1.000000000000000000e+00 1.152386230468750000e+03
5.000000000000000000e+00 3.668846153846153584e+02 2.492277526855468750e+02 3.666992187500000000e+00 0.000000000000000000e+00 0.000000000000000000e+00 2.662634277343750000e+03 1.000000000000000000e+00 6.706182861328125000e+02
4.000000000000000000e+00 3.693153846153842323e+02 1.429629058837890625e+02 3.931610107421875000e+00 0.000000000000000000e+00 0.000000000000000000e+00 3.268076171875000000e+03 1.000000000000000000e+00 6.832718505859375000e+02
0.000000000000000000e+00 2.219615384615385096e+02 1.609322967529296875e+02 -1.226519775390625000e+01 9.962971210479736328e-01 0.000000000000000000e+00 8.679884643554687500e+02 1.000000000000000000e+00 1.512558135986328125e+02
7.000000000000000000e+00 3.110384615384616041e+02 1.957540435791015625e+02 -1.001394653320312500e+01 9.961180686950683594e-01 0.000000000000000000e+00 7.386467895507812500e+02 1.000000000000000000e+00 1.128204345703125000e+01
6.500000000000000000e+01 1.230538461538460808e+02 1.303570709228515625e+02 -8.575286865234375000e+00 7.677500247955322266e-01 8.235294222831726074e-01 1.230082397460937500e+03 4.000000000000000000e+00 3.511452331542968750e+02
3.500000000000000000e+01 5.762076923076923549e+02 2.873374938964843750e+02 -4.024780273437500000e+00 1.847945004701614380e-01 5.882352963089942932e-02 1.979108032226562500e+03 3.000000000000000000e+00 2.155627136230468750e+02
1.500000000000000000e+01 8.147769230769227988e+02 4.371685180664062500e+02 -6.497253417968750000e+00 6.352759599685668945e-01 0.000000000000000000e+00 1.140637939453125000e+03 2.000000000000000000e+00 4.776534118652343750e+02
7.100000000000000000e+01 9.884000000000000909e+02 5.286614990234375000e+02 -6.365966796875000000e-01 9.999999776482582092e-03 2.941176593303680420e-01 1.825952148437500000e+03 4.000000000000000000e+00 2.802671203613281250e+02
8.000000000000000000e+00 3.475999999999999659e+02 2.163930053710937500e+02 3.756286621093750000e+00 0.000000000000000000e+00 1.176470592617988586e-01 2.999203369140625000e+03 1.000000000000000000e+00 1.227140380859375000e+03
0.000000000000000000e+00 3.834153846153846530e+02 2.532940979003906250e+02 -1.130249023437500000e+01 9.948635101318359375e-01 0.000000000000000000e+00 2.953041381835937500e+02 1.000000000000000000e+00 2.670443916320800781e+01
1.100000000000000000e+01 6.350307692307692378e+02 3.611394958496093750e+02 -6.782989501953125000e+00 7.719287872314453125e-01 0.000000000000000000e+00 1.029213867187500000e+03 2.000000000000000000e+00 1.929889526367187500e+02
2.000000000000000000e+00 3.329153846153846530e+02 1.252124557495117188e+02 3.246917724609375000e+00 0.000000000000000000e+00 2.941176593303680420e-01 2.843898681640625000e+03 1.000000000000000000e+00 9.763755493164062500e+02
4.100000000000000000e+01 7.446384615384614563e+02 3.300095520019531250e+02 2.605468750000000000e+00 0.000000000000000000e+00 0.000000000000000000e+00 3.046254882812500000e+03 3.000000000000000000e+00 3.908229370117187500e+02
5.000000000000000000e+00 2.568076923076922071e+02 2.446272888183593750e+02 3.398559570312500000e+00 0.000000000000000000e+00 2.941176593303680420e-01 2.581294677734375000e+03 1.000000000000000000e+00 6.974080810546875000e+02
6.100000000000000000e+01 6.831307692307692605e+02 4.020956420898437500e+02 -2.026367187500000000e+00 0.000000000000000000e+00 0.000000000000000000e+00 2.115519775390625000e+03 4.000000000000000000e+00 1.339120788574218750e+02
4.200000000000000000e+01 5.567230769230766327e+02 1.866910095214843750e+02 -2.517639160156250000e+00 0.000000000000000000e+00 0.000000000000000000e+00 1.216490600585937500e+03 3.000000000000000000e+00 1.281846557617187500e+03
2.800000000000000000e+01 6.416769230769233445e+02 2.456781768798828125e+02 -6.584564208984375000e+00 3.524556457996368408e-01 5.882352963089942932e-02 5.957794189453125000e+02 3.000000000000000000e+00 7.171350708007812500e+02
6.100000000000000000e+01 1.134484615384615836e+03 5.024552612304687500e+02 -2.883422851562500000e+00 2.559279799461364746e-01 0.000000000000000000e+00 1.687249145507812500e+03 4.000000000000000000e+00 6.021996459960937500e+02
3.000000000000000000e+00 5.000538461538461661e+02 2.570056457519531250e+02 6.040649414062500000e-01 0.000000000000000000e+00 2.117647171020507812e+00 2.694002929687500000e+03 1.000000000000000000e+00 5.795292358398437500e+02
0.000000000000000000e+00 1.523230769230769113e+02 8.927786254882812500e+01 -1.341540527343750000e+01 9.987575411796569824e-01 0.000000000000000000e+00 7.980719604492187500e+02 1.000000000000000000e+00 2.664170227050781250e+02
5.000000000000000000e+00 3.715076923076924800e+02 1.680107116699218750e+02 3.909545898437500000e+00 0.000000000000000000e+00 0.000000000000000000e+00 3.297392822265625000e+03 1.000000000000000000e+00 7.249975585937500000e+02
0.000000000000000000e+00 1.758769230769231058e+02 1.693692321777343750e+02 -1.012127685546875000e+01 9.744789600372314453e-01 0.000000000000000000e+00 6.035320434570312500e+02 1.000000000000000000e+00 2.764439086914062500e+02
4.800000000000000000e+01 2.549769230769230717e+02 1.278068237304687500e+02 -7.457977294921875000e+00 3.034718930721282959e-01 0.000000000000000000e+00 8.798560791015625000e+02 4.000000000000000000e+00 8.462467041015625000e+02
7.000000000000000000e+00 5.854692307692305349e+02 2.470859069824218750e+02 -9.929504394531250000e-01 9.999999776482582092e-03 0.000000000000000000e+00 1.320056518554687500e+03 1.000000000000000000e+00 2.344514274597167969e+01
5.400000000000000000e+01 4.771230769230768942e+02 2.316675720214843750e+02 -3.736694335937500000e+00 0.000000000000000000e+00 5.294117927551269531e-01 1.481520751953125000e+03 4.000000000000000000e+00 4.430471801757812500e+02
4.900000000000000000e+01 6.706076923076923322e+02 2.477467651367187500e+02 -1.055206298828125000e+00 0.000000000000000000e+00 0.000000000000000000e+00 2.384015869140625000e+03 4.000000000000000000e+00 3.514350891113281250e+02
3.400000000000000000e+01 2.444153846153845961e+02 2.032874450683593750e+02 -8.043975830078125000e+00 8.646978735923767090e-01 5.882353186607360840e-01 1.188354980468750000e+03 3.000000000000000000e+00 3.418847045898437500e+02
5.100000000000000000e+01 5.888461538461536975e+02 2.925363159179687500e+02 1.934204101562500000e-01 0.000000000000000000e+00 1.882352948188781738e+00 2.614773925781250000e+03 4.000000000000000000e+00 2.620137329101562500e+02
4.500000000000000000e+01 6.779153846153848235e+02 2.941304626464843750e+02 -2.992492675781250000e+00 9.999999776482582092e-03 2.352941185235977173e-01 1.977012329101562500e+03 4.000000000000000000e+00 1.739680328369140625e+02
6.100000000000000000e+01 8.520000000000001137e+02 4.633320922851562500e+02 -1.190734863281250000e+00 0.000000000000000000e+00 0.000000000000000000e+00 2.223552978515625000e+03 4.000000000000000000e+00 2.821734924316406250e+02
4.800000000000000000e+01 5.066230769230768374e+02 2.179339294433593750e+02 -6.924438476562500000e-01 0.000000000000000000e+00 0.000000000000000000e+00 1.684989135742187500e+03 4.000000000000000000e+00 7.976267700195312500e+02
4.900000000000000000e+01 8.638230769230766555e+02 3.447168884277343750e+02 -4.648132324218750000e-01 0.000000000000000000e+00 0.000000000000000000e+00 2.377073730468750000e+03 4.000000000000000000e+00 3.167617797851562500e+02
6.100000000000000000e+01 4.648692307692307963e+02 1.647053222656250000e+02 -1.194641113281250000e+00 9.999999776482582092e-03 0.000000000000000000e+00 2.203732910156250000e+03 4.000000000000000000e+00 5.663460083007812500e+02
0.000000000000000000e+00 2.247692307692307736e+02 1.544552612304687500e+02 -1.524658203125000000e+01 9.999750256538391113e-01 0.000000000000000000e+00 6.701320190429687500e+02 1.000000000000000000e+00 2.848308715820312500e+02
4.000000000000000000e+01 1.216700000000000045e+03 5.370006713867187500e+02 2.155487060546875000e+00 0.000000000000000000e+00 0.000000000000000000e+00 2.456590820312500000e+03 3.000000000000000000e+00 3.017593383789062500e+02
2.300000000000000000e+01 5.994384615384615245e+02 1.957810363769531250e+02 -2.695922851562500000e+00 0.000000000000000000e+00 7.058823704719543457e-01 1.297072875976562500e+03 3.000000000000000000e+00 5.162697753906250000e+02
1.300000000000000000e+01 2.377384615384615358e+02 2.350435028076171875e+02 -1.022845458984375000e+01 8.407932519912719727e-01 0.000000000000000000e+00 1.058638305664062500e+03 2.000000000000000000e+00 4.398963928222656250e+02
1.000000000000000000e+00 5.663692307692306258e+02 6.001725463867187500e+02 -2.729431152343750000e+00 9.999999776482582092e-03 0.000000000000000000e+00 9.165169067382812500e+02 1.000000000000000000e+00 9.901111450195312500e+02
5.000000000000000000e+01 1.263753846153846098e+03 5.146528930664062500e+02 1.913787841796875000e+00 0.000000000000000000e+00 0.000000000000000000e+00 2.633321289062500000e+03 4.000000000000000000e+00 4.314564514160156250e+02
6.500000000000000000e+01 1.058792307692307986e+03 5.000729980468750000e+02 6.213073730468750000e-01 0.000000000000000000e+00 0.000000000000000000e+00 2.431188476562500000e+03 4.000000000000000000e+00 3.356127929687500000e+02
6.300000000000000000e+01 1.204276923076922458e+03 5.690910034179687500e+02 3.062866210937500000e+00 0.000000000000000000e+00 0.000000000000000000e+00 2.548357666015625000e+03 4.000000000000000000e+00 9.380888366699218750e+01
2.500000000000000000e+01 8.086461538461539931e+02 4.373619689941406250e+02 -6.050781250000000000e+00 5.897128582000732422e-01 0.000000000000000000e+00 1.194556274414062500e+03 3.000000000000000000e+00 5.788082275390625000e+02
1.300000000000000000e+01 6.421923076923079634e+02 2.145358428955078125e+02 -3.681030273437500000e-01 0.000000000000000000e+00 0.000000000000000000e+00 1.411167236328125000e+03 2.000000000000000000e+00 1.335234375000000000e+02
1.100000000000000000e+01 7.535384615384614335e+02 4.790878906250000000e+02 -2.291259765625000000e+00 0.000000000000000000e+00 0.000000000000000000e+00 1.039033935546875000e+03 2.000000000000000000e+00 5.349450683593750000e+02
1.700000000000000000e+01 8.480230769230772694e+02 4.505862121582031250e+02 -6.022521972656250000e+00 5.287954211235046387e-01 0.000000000000000000e+00 1.197774291992187500e+03 2.000000000000000000e+00 5.890216064453125000e+02
6.400000000000000000e+01 8.348846153846158131e+02 4.129641418457031250e+02 8.815612792968750000e-01 0.000000000000000000e+00 0.000000000000000000e+00 2.617840820312500000e+03 4.000000000000000000e+00 4.101879882812500000e+02
0.000000000000000000e+00 2.481384615384615131e+02 1.431924133300781250e+02 -1.262084960937500000e+01 9.983783960342407227e-01 0.000000000000000000e+00 4.237207336425781250e+02 1.000000000000000000e+00 2.961572875976562500e+02
2.500000000000000000e+01 7.650153846153851873e+02 4.417071838378906250e+02 -6.722198486328125000e+00 6.485813260078430176e-01 2.352941185235977173e-01 1.079434326171875000e+03 3.000000000000000000e+00 5.068322143554687500e+02
7.000000000000000000e+00 3.777076923076922412e+02 2.712533569335937500e+02 2.882202148437500000e+00 0.000000000000000000e+00 8.823529481887817383e-01 2.766246093750000000e+03 1.000000000000000000e+00 1.379353515625000000e+03
3.700000000000000000e+01 4.147076923076920707e+02 2.176736755371093750e+02 -2.180236816406250000e+00 0.000000000000000000e+00 2.352941185235977173e-01 2.000196044921875000e+03 3.000000000000000000e+00 3.281127014160156250e+02
4.000000000000000000e+00 2.626076923076922185e+02 2.250690460205078125e+02 -1.487670898437500000e+01 9.999831914901733398e-01 0.000000000000000000e+00 4.641170349121093750e+02 1.000000000000000000e+00 3.539129638671875000e+02
5.600000000000000000e+01 5.271615384615384983e+02 2.845915527343750000e+02 -4.471008300781250000e+00 2.247837185859680176e-01 5.882353186607360840e-01 1.842015502929687500e+03 4.000000000000000000e+00 2.741654968261718750e+02
3.400000000000000000e+01 3.435538461538462229e+02 2.195212097167968750e+02 -3.983154296875000000e+00 2.125822454690933228e-01 0.000000000000000000e+00 1.976148803710937500e+03 3.000000000000000000e+00 2.593540344238281250e+02
0.000000000000000000e+00 2.135846153846154039e+02 1.711397247314453125e+02 -1.668069458007812500e+01 9.999910593032836914e-01 0.000000000000000000e+00 5.400574340820312500e+02 1.000000000000000000e+00 2.305206909179687500e+02
2.100000000000000000e+01 4.076999999999999318e+02 3.172451782226562500e+02 -8.255615234375000000e+00 8.907337188720703125e-01 0.000000000000000000e+00 1.209805175781250000e+03 3.000000000000000000e+00 1.959218597412109375e+02
7.100000000000000000e+01 1.401061538461537793e+03 5.621088256835937500e+02 4.443817138671875000e+00 0.000000000000000000e+00 0.000000000000000000e+00 2.611541015625000000e+03 4.000000000000000000e+00 9.763838195800781250e+01
2.900000000000000000e+01 8.287538461538463253e+02 4.084529113769531250e+02 5.949707031250000000e-01 0.000000000000000000e+00 2.352941185235977173e-01 2.293327148437500000e+03 3.000000000000000000e+00 3.583916320800781250e+02
2.900000000000000000e+01 8.326153846153846416e+02 6.143392944335937500e+02 1.284271240234375000e+00 0.000000000000000000e+00 0.000000000000000000e+00 2.201320312500000000e+03 3.000000000000000000e+00 1.347689941406250000e+03
6.000000000000000000e+00 2.997615384615385210e+02 2.029603271484375000e+02 3.531036376953125000e+00 0.000000000000000000e+00 0.000000000000000000e+00 3.130970703125000000e+03 1.000000000000000000e+00 9.338153686523437500e+02
1.100000000000000000e+01 2.589076923076923435e+02 1.009536361694335938e+02 -7.848815917968750000e+00 7.501598596572875977e-01 5.882353186607360840e-01 1.168886474609375000e+03 2.000000000000000000e+00 5.300074462890625000e+02
0.000000000000000000e+00 2.215000000000000284e+02 1.839440917968750000e+02 -1.696972656250000000e+01 9.999790191650390625e-01 0.000000000000000000e+00 4.916674194335937500e+02 1.000000000000000000e+00 2.099471130371093750e+02
5.400000000000000000e+01 9.149384615384623203e+02 4.709154052734375000e+02 -2.923614501953125000e+00 9.999999776482582092e-03 0.000000000000000000e+00 1.794499877929687500e+03 4.000000000000000000e+00 4.498727722167968750e+02
6.200000000000000000e+01 7.873615384615386574e+02 2.702615356445312500e+02 -2.617980957031250000e+00 1.127694249153137207e-01 0.000000000000000000e+00 2.073062744140625000e+03 4.000000000000000000e+00 3.906453247070312500e+02
3.000000000000000000e+01 4.492153846153845507e+02 2.793763427734375000e+02 -5.612823486328125000e+00 4.225460290908813477e-01 1.470588207244873047e+00 1.562633911132812500e+03 3.000000000000000000e+00 3.904440002441406250e+02
3.400000000000000000e+01 3.259230769230770193e+02 1.643293609619140625e+02 -7.230773925781250000e+00 7.506142854690551758e-01 0.000000000000000000e+00 1.301591186523437500e+03 3.000000000000000000e+00 5.007081298828125000e+02
4.000000000000000000e+01 3.005230769230769283e+02 1.700238342285156250e+02 -9.109649658203125000e+00 5.497797727584838867e-01 5.294117927551269531e-01 1.118757202148437500e+03 3.000000000000000000e+00 1.344392089843750000e+02
2.200000000000000000e+01 3.794461538461538339e+02 2.274002990722656250e+02 -5.352569580078125000e+00 2.907176017761230469e-01 5.882353186607360840e-01 1.413004882812500000e+03 3.000000000000000000e+00 5.489597320556640625e+01
1.000000000000000000e+00 2.058846153846153868e+02 1.749778442382812500e+02 -1.097531127929687500e+01 9.853386878967285156e-01 0.000000000000000000e+00 9.043091430664062500e+02 1.000000000000000000e+00 2.732274780273437500e+02
4.000000000000000000e+00 3.638923076923077815e+02 1.919552459716796875e+02 3.863494873046875000e+00 0.000000000000000000e+00 5.294117927551269531e-01 3.032222900390625000e+03 1.000000000000000000e+00 9.303168945312500000e+02
2.600000000000000000e+01 1.208000000000000227e+03 4.871895751953125000e+02 2.570800781250000000e-01 0.000000000000000000e+00 0.000000000000000000e+00 2.213376708984375000e+03 3.000000000000000000e+00 5.611240844726562500e+02
4.400000000000000000e+01 4.732692307692306031e+02 1.673725280761718750e+02 -6.884094238281250000e+00 3.023882508277893066e-01 5.294117927551269531e-01 1.062064819335937500e+03 3.000000000000000000e+00 9.580935668945312500e+02
4.000000000000000000e+00 4.601384615384617405e+02 4.112628173828125000e+02 -6.086517333984375000e+00 8.154182434082031250e-01 0.000000000000000000e+00 6.444271240234375000e+02 1.000000000000000000e+00 1.661233398437500000e+03
4.200000000000000000e+01 6.903230769230766555e+02 2.333312988281250000e+02 -3.741516113281250000e+00 2.104342579841613770e-01 5.294117927551269531e-01 1.909111694335937500e+03 3.000000000000000000e+00 2.624577636718750000e+02
0.000000000000000000e+00 2.196230769230769226e+02 1.813420562744140625e+02 -1.696939086914062500e+01 9.999794363975524902e-01 0.000000000000000000e+00 4.993475341796875000e+02 1.000000000000000000e+00 1.595251617431640625e+02
0.000000000000000000e+00 2.391307692307692037e+02 1.681922302246093750e+02 -1.220254516601562500e+01 9.963892698287963867e-01 0.000000000000000000e+00 9.096078491210937500e+02 1.000000000000000000e+00 1.570265045166015625e+02
5.900000000000000000e+01 3.768538461538464048e+02 1.787155456542968750e+02 -2.820098876953125000e+00 9.999999776482582092e-03 1.176470592617988586e-01 2.053524169921875000e+03 4.000000000000000000e+00 2.607147521972656250e+02
1.000000000000000000e+01 2.353692307692307963e+02 2.050433807373046875e+02 -1.006362915039062500e+01 9.806892275810241699e-01 0.000000000000000000e+00 1.025931274414062500e+03 2.000000000000000000e+00 4.746747131347656250e+02
4.600000000000000000e+01 4.299846153846154948e+02 2.288690643310546875e+02 -1.035919189453125000e+00 9.999999776482582092e-03 5.882353186607360840e-01 2.165268310546875000e+03 4.000000000000000000e+00 7.196154785156250000e+02
1.200000000000000000e+01 4.828769230769229921e+02 2.772052001953125000e+02 -4.173950195312500000e+00 1.212561652064323425e-01 0.000000000000000000e+00 1.344878295898437500e+03 2.000000000000000000e+00 7.898189544677734375e+01
0.000000000000000000e+00 2.263000000000000398e+02 1.597906799316406250e+02 -1.239831542968750000e+01 9.982191920280456543e-01 0.000000000000000000e+00 8.439895629882812500e+02 1.000000000000000000e+00 1.904698944091796875e+02
0.000000000000000000e+00 2.170769230769230660e+02 1.419666748046875000e+02 -1.445800781250000000e+01 9.998474717140197754e-01 0.000000000000000000e+00 7.325392456054687500e+02 1.000000000000000000e+00 1.518310852050781250e+02
5.000000000000000000e+00 5.267307692307692832e+02 3.070729980468750000e+02 -6.258483886718750000e+00 6.016715168952941895e-01 6.470588445663452148e-01 1.411713256835937500e+03 1.000000000000000000e+00 6.366521072387695312e+01
2.000000000000000000e+00 3.314461538461537202e+02 2.096279296875000000e+02 4.321197509765625000e+00 0.000000000000000000e+00 7.058823704719543457e-01 2.993604492187500000e+03 1.000000000000000000e+00 8.381884155273437500e+02
3.800000000000000000e+01 5.070538461538460524e+02 2.427751770019531250e+02 -2.241577148437500000e+00 9.999999776482582092e-03 0.000000000000000000e+00 2.181803955078125000e+03 3.000000000000000000e+00 4.366341857910156250e+02
2.800000000000000000e+01 5.924153846153845961e+02 2.145203094482421875e+02 -4.670135498046875000e+00 3.193685114383697510e-01 2.941176593303680420e-01 1.712979003906250000e+03 3.000000000000000000e+00 1.085257186889648438e+02
0.000000000000000000e+00 1.721615384615385835e+02 8.191403198242187500e+01 -1.245315551757812500e+01 9.879415035247802734e-01 0.000000000000000000e+00 7.668358154296875000e+02 1.000000000000000000e+00 9.409053039550781250e+01
6.200000000000000000e+01 4.396153846153846985e+02 1.621161346435546875e+02 -6.953277587890625000e+00 3.406750857830047607e-01 8.235294222831726074e-01 8.634495849609375000e+02 4.000000000000000000e+00 9.697003173828125000e+02
3.200000000000000000e+01 3.578384615384615586e+02 1.766924743652343750e+02 -4.150054931640625000e+00 2.096556276082992554e-01 0.000000000000000000e+00 1.836472167968750000e+03 3.000000000000000000e+00 2.521405944824218750e+02
8.000000000000000000e+00 2.970153846153846189e+02 1.813388519287109375e+02 -6.626861572265625000e+00 7.799447774887084961e-01 0.000000000000000000e+00 1.440563964843750000e+03 1.000000000000000000e+00 4.610072937011718750e+02
6.900000000000000000e+01 1.125769230769230234e+02 1.336865081787109375e+02 -9.689392089843750000e+00 7.663497924804687500e-01 5.294117927551269531e-01 1.178888549804687500e+03 4.000000000000000000e+00 3.083604736328125000e+02
6.000000000000000000e+00 4.193153846153845734e+02 2.639287719726562500e+02 9.336242675781250000e-01 0.000000000000000000e+00 0.000000000000000000e+00 2.241386718750000000e+03 1.000000000000000000e+00 1.122803833007812500e+03
6.100000000000000000e+01 1.001300000000000409e+03 5.257714233398437500e+02 -7.727050781250000000e-02 0.000000000000000000e+00 1.176470592617988586e-01 1.776979248046875000e+03 4.000000000000000000e+00 2.019813385009765625e+02
3.300000000000000000e+01 5.747615384615384073e+02 1.320954589843750000e+02 -1.711425781250000000e-01 0.000000000000000000e+00 0.000000000000000000e+00 2.529883544921875000e+03 3.000000000000000000e+00 2.981844482421875000e+02
5.000000000000000000e+00 5.267307692307692832e+02 3.070729980468750000e+02 -6.258483886718750000e+00 6.016715168952941895e-01 6.470588445663452148e-01 1.411713256835937500e+03 1.000000000000000000e+00 6.366521072387695312e+01
1.000000000000000000e+00 3.186999999999998181e+02 1.517588806152343750e+02 2.578735351562500000e+00 0.000000000000000000e+00 1.235294103622436523e+00 2.687512939453125000e+03 1.000000000000000000e+00 9.303930053710937500e+02
0.000000000000000000e+00 2.161461538461538225e+02 1.085718231201171875e+02 -1.238449096679687500e+01 9.975000023841857910e-01 0.000000000000000000e+00 8.768683471679687500e+02 1.000000000000000000e+00 5.173108520507812500e+02
0.000000000000000000e+00 4.989153846153846530e+02 2.949706115722656250e+02 -1.000335693359375000e+01 9.538940787315368652e-01 0.000000000000000000e+00 8.196646118164062500e+02 1.000000000000000000e+00 1.644809417724609375e+02
1.700000000000000000e+01 3.199999999999998863e+02 2.550058898925781250e+02 -5.841430664062500000e+00 7.341914772987365723e-01 0.000000000000000000e+00 1.355049926757812500e+03 2.000000000000000000e+00 4.971843566894531250e+02
1.000000000000000000e+00 6.344230769230772466e+02 3.560100402832031250e+02 -7.177886962890625000e+00 8.152818679809570312e-01 0.000000000000000000e+00 1.118751220703125000e+03 1.000000000000000000e+00 2.195699615478515625e+02
2.000000000000000000e+01 3.427615384615384073e+02 2.257491760253906250e+02 -7.072479248046875000e+00 7.963507175445556641e-01 5.882353186607360840e-01 1.310088745117187500e+03 3.000000000000000000e+00 4.489495544433593750e+02
4.900000000000000000e+01 4.911769230769231740e+02 2.627610473632812500e+02 -3.282196044921875000e+00 1.218200922012329102e-01 0.000000000000000000e+00 1.025120605468750000e+03 4.000000000000000000e+00 1.226562744140625000e+03
0.000000000000000000e+00 2.693153846153846303e+02 2.148227081298828125e+02 -9.959259033203125000e+00 9.614543318748474121e-01 0.000000000000000000e+00 9.982062377929687500e+02 1.000000000000000000e+00 3.793662719726562500e+02
1.000000000000000000e+00 1.017161538461538385e+03 6.596281738281250000e+02 -1.707977294921875000e+00 2.963816821575164795e-01 0.000000000000000000e+00 9.688404541015625000e+02 1.000000000000000000e+00 9.131657104492187500e+02
2.000000000000000000e+00 5.781692307692308077e+02 4.417665405273437500e+02 -4.765960693359375000e+00 5.051299333572387695e-01 0.000000000000000000e+00 8.599003906250000000e+02 1.000000000000000000e+00 1.401279663085937500e+03
2.000000000000000000e+00 1.690999999999999659e+02 1.837989654541015625e+02 -1.059960937500000000e+01 9.710782170295715332e-01 0.000000000000000000e+00 9.074611206054687500e+02 1.000000000000000000e+00 6.328632812500000000e+02
1.900000000000000000e+01 3.030999999999999659e+02 1.787782897949218750e+02 -6.649139404296875000e+00 6.242309808731079102e-01 0.000000000000000000e+00 1.427315673828125000e+03 2.000000000000000000e+00 3.243934326171875000e+02
4.200000000000000000e+01 4.710384615384616609e+02 2.934178771972656250e+02 -5.555847167968750000e+00 4.408752918243408203e-01 7.058823704719543457e-01 1.660681396484375000e+03 3.000000000000000000e+00 3.758079833984375000e+02
1.000000000000000000e+00 6.521461538461539931e+02 3.470076904296875000e+02 -7.649078369140625000e+00 8.118355274200439453e-01 0.000000000000000000e+00 1.114851196289062500e+03 1.000000000000000000e+00 2.757777099609375000e+02
6.000000000000000000e+00 2.399307692307692150e+02 2.094157867431640625e+02 -9.688232421875000000e+00 9.681661725044250488e-01 0.000000000000000000e+00 1.088554931640625000e+03 1.000000000000000000e+00 4.579952087402343750e+02
5.600000000000000000e+01 1.105769230769230717e+03 5.785851440429687500e+02 -1.081817626953125000e+00 9.999999776482582092e-03 0.000000000000000000e+00 1.396470581054687500e+03 4.000000000000000000e+00 2.019593811035156250e+02
4.300000000000000000e+01 6.116615384615387256e+02 4.903478698730468750e+02 -2.617797851562500000e-01 0.000000000000000000e+00 4.705882370471954346e-01 1.920683227539062500e+03 3.000000000000000000e+00 7.784222412109375000e+02
2.900000000000000000e+01 3.711923076923077360e+02 2.529946899414062500e+02 -5.652801513671875000e+00 5.503680109977722168e-01 0.000000000000000000e+00 1.135638793945312500e+03 3.000000000000000000e+00 2.162301483154296875e+02
4.900000000000000000e+01 1.206315384615384573e+03 5.179691772460937500e+02 1.887573242187500000e+00 0.000000000000000000e+00 0.000000000000000000e+00 2.546516601562500000e+03 4.000000000000000000e+00 1.228268966674804688e+02
1.100000000000000000e+01 2.157538461538461547e+02 1.343113098144531250e+02 -9.294799804687500000e+00 9.537473917007446289e-01 0.000000000000000000e+00 1.122823608398437500e+03 2.000000000000000000e+00 2.987086486816406250e+02
6.400000000000000000e+01 4.442384615384614790e+02 2.083162384033203125e+02 -4.096984863281250000e-01 0.000000000000000000e+00 2.352941185235977173e-01 2.154452392578125000e+03 4.000000000000000000e+00 6.146011352539062500e+02
2.600000000000000000e+01 4.820076923076920821e+02 1.838570098876953125e+02 -6.688995361328125000e+00 5.777034163475036621e-01 2.352941185235977173e-01 8.046052856445312500e+02 3.000000000000000000e+00 1.184620117187500000e+03
1.000000000000000000e+00 3.566846153846153697e+02 2.458351287841796875e+02 -1.074307250976562500e+01 9.874811768531799316e-01 0.000000000000000000e+00 4.168500671386718750e+02 1.000000000000000000e+00 1.280568389892578125e+02
3.700000000000000000e+01 4.068615384615383732e+02 1.977231750488281250e+02 -2.866943359375000000e+00 9.999999776482582092e-03 5.882353186607360840e-01 2.010923828125000000e+03 3.000000000000000000e+00 3.144049072265625000e+02
5.500000000000000000e+01 1.363246153846153902e+03 5.379009399414062500e+02 6.015533447265625000e+00 0.000000000000000000e+00 0.000000000000000000e+00 2.478606445312500000e+03 4.000000000000000000e+00 1.092383880615234375e+02
0.000000000000000000e+00 5.817230769230768601e+02 4.276816711425781250e+02 -3.688293457031250000e+00 9.999999776482582092e-03 0.000000000000000000e+00 9.644141845703125000e+02 1.000000000000000000e+00 1.292548583984375000e+03
6.900000000000000000e+01 6.607692307692312852e+02 2.777459411621093750e+02 1.784759521484375000e+00 0.000000000000000000e+00 7.647058963775634766e-01 2.226291748046875000e+03 4.000000000000000000e+00 1.156654541015625000e+03
6.900000000000000000e+01 9.318692307692306258e+02 4.693503723144531250e+02 1.391296386718750000e+00 0.000000000000000000e+00 0.000000000000000000e+00 2.659817626953125000e+03 4.000000000000000000e+00 3.582673339843750000e+02
0.000000000000000000e+00 1.187307692307692122e+02 1.391298980712890625e+02 -1.288772583007812500e+01 9.978368878364562988e-01 5.882352963089942932e-02 8.704244384765625000e+02 1.000000000000000000e+00 8.067130737304687500e+02
4.300000000000000000e+01 2.809769230769229011e+02 1.829531097412109375e+02 -8.984466552734375000e+00 6.591838598251342773e-01 0.000000000000000000e+00 7.837919921875000000e+02 3.000000000000000000e+00 1.168595458984375000e+03
3.000000000000000000e+01 4.893999999999999204e+02 3.377076721191406250e+02 -4.562622070312500000e+00 0.000000000000000000e+00 2.941176593303680420e-01 9.735013427734375000e+02 3.000000000000000000e+00 2.493564796447753906e+01
1.000000000000000000e+00 3.931000000000001364e+02 2.296972656250000000e+02 -1.098535156250000000e+01 9.905049800872802734e-01 0.000000000000000000e+00 5.428614501953125000e+02 1.000000000000000000e+00 2.690505981445312500e+02
2.700000000000000000e+01 6.010999999999999091e+02 2.383549346923828125e+02 -4.897430419921875000e+00 3.442011773586273193e-01 0.000000000000000000e+00 1.600726684570312500e+03 3.000000000000000000e+00 1.313892364501953125e+02
1.200000000000000000e+01 5.899307692307691013e+02 3.188478698730468750e+02 -3.235107421875000000e+00 1.553585827350616455e-01 3.529411852359771729e-01 1.863011230468750000e+03 2.000000000000000000e+00 4.284396362304687500e+01
6.000000000000000000e+01 1.257876923076922822e+03 5.699851684570312500e+02 2.642333984375000000e+00 0.000000000000000000e+00 0.000000000000000000e+00 2.526920166015625000e+03 4.000000000000000000e+00 1.707548370361328125e+02
0.000000000000000000e+00 3.058846153846154721e+02 1.474654998779296875e+02 2.057037353515625000e+00 0.000000000000000000e+00 0.000000000000000000e+00 2.714777832031250000e+03 1.000000000000000000e+00 6.877773437500000000e+02
0.000000000000000000e+00 2.732692307692307168e+02 1.625722656250000000e+02 -1.340811157226562500e+01 9.979628324508666992e-01 0.000000000000000000e+00 4.141313781738281250e+02 1.000000000000000000e+00 3.059662780761718750e+02
1.000000000000000000e+00 1.407000000000000171e+02 1.735583648681640625e+02 -1.192013549804687500e+01 9.734907746315002441e-01 0.000000000000000000e+00 1.009983337402343750e+03 1.000000000000000000e+00 8.910242919921875000e+02
6.300000000000000000e+01 1.029430769230770011e+03 4.143117065429687500e+02 2.793914794921875000e+00 0.000000000000000000e+00 0.000000000000000000e+00 2.711020263671875000e+03 4.000000000000000000e+00 4.207136230468750000e+02
1.600000000000000000e+01 6.814846153846151537e+02 3.657360839843750000e+02 -6.321472167968750000e+00 7.170045375823974609e-01 0.000000000000000000e+00 1.166983398437500000e+03 2.000000000000000000e+00 2.694122619628906250e+02
2.700000000000000000e+01 2.704384615384615245e+02 2.101271820068359375e+02 -8.876281738281250000e+00 8.721394538879394531e-01 0.000000000000000000e+00 1.113084106445312500e+03 3.000000000000000000e+00 2.919100952148437500e+02
6.600000000000000000e+01 6.014538461538460297e+02 1.904819183349609375e+02 -2.877380371093750000e+00 0.000000000000000000e+00 2.352941185235977173e-01 1.168509033203125000e+03 4.000000000000000000e+00 1.013475097656250000e+03
6.700000000000000000e+01 1.026969230769230535e+03 4.413287353515625000e+02 -3.991638183593750000e+00 2.452758848667144775e-01 0.000000000000000000e+00 1.508168945312500000e+03 4.000000000000000000e+00 5.317663574218750000e+02
1.100000000000000000e+01 2.700153846153846189e+02 1.894860992431640625e+02 -1.057122802734375000e+01 9.767733216285705566e-01 0.000000000000000000e+00 9.549847412109375000e+02 2.000000000000000000e+00 3.427043151855468750e+02
0.000000000000000000e+00 1.969000000000000341e+02 1.168185653686523438e+02 -1.295040893554687500e+01 9.990335106849670410e-01 0.000000000000000000e+00 7.945482177734375000e+02 1.000000000000000000e+00 2.319737396240234375e+02
0.000000000000000000e+00 3.501692307692308077e+02 2.233144836425781250e+02 -1.186422729492187500e+01 9.972928762435913086e-01 0.000000000000000000e+00 5.204901123046875000e+02 1.000000000000000000e+00 4.109219055175781250e+02
3.900000000000000000e+01 5.916692307692309214e+02 2.442601318359375000e+02 -2.807067871093750000e+00 9.999999776482582092e-03 2.352941185235977173e-01 2.151692138671875000e+03 3.000000000000000000e+00 2.593195190429687500e+02
2.000000000000000000e+01 3.333307692307693060e+02 1.858491363525390625e+02 3.353637695312500000e+00 0.000000000000000000e+00 0.000000000000000000e+00 3.120537353515625000e+03 3.000000000000000000e+00 9.353649902343750000e+02
6.200000000000000000e+01 4.924615384615385096e+02 2.589441528320312500e+02 -3.369293212890625000e+00 0.000000000000000000e+00 0.000000000000000000e+00 1.068887939453125000e+03 4.000000000000000000e+00 1.016253295898437500e+03
1.100000000000000000e+01 4.270538461538460524e+02 2.016386108398437500e+02 -1.549957275390625000e+00 9.999999776482582092e-03 1.176470637321472168e+00 2.087657714843750000e+03 2.000000000000000000e+00 4.175655822753906250e+02
9.000000000000000000e+00 3.216769230769231172e+02 2.285293121337890625e+02 -9.975189208984375000e+00 9.530650377273559570e-01 0.000000000000000000e+00 1.054291992187500000e+03 1.000000000000000000e+00 3.497045898437500000e+02
0.000000000000000000e+00 2.243923076923076962e+02 2.115852813720703125e+02 -1.566030883789062500e+01 9.999824166297912598e-01 0.000000000000000000e+00 4.717746582031250000e+02 1.000000000000000000e+00 3.351661987304687500e+02
8.000000000000000000e+00 7.647999999999999545e+02 4.475109863281250000e+02 4.898895263671875000e+00 0.000000000000000000e+00 2.941176593303680420e-01 3.270876464843750000e+03 1.000000000000000000e+00 5.736760253906250000e+02
0.000000000000000000e+00 2.888538461538463480e+02 1.252982635498046875e+02 2.546966552734375000e+00 0.000000000000000000e+00 1.588235259056091309e+00 2.737913818359375000e+03 1.000000000000000000e+00 7.151439819335937500e+02
0.000000000000000000e+00 1.767615384615384357e+02 1.546231842041015625e+02 -1.386837768554687500e+01 9.997656345367431641e-01 0.000000000000000000e+00 7.173818969726562500e+02 1.000000000000000000e+00 1.373968048095703125e+02
4.000000000000000000e+00 2.943999999999999773e+02 1.669828186035156250e+02 -7.444458007812500000e+00 6.855838894844055176e-01 0.000000000000000000e+00 1.219794555664062500e+03 1.000000000000000000e+00 3.055918273925781250e+02
6.600000000000000000e+01 4.662307692307694538e+02 3.304971618652343750e+02 -1.818267822265625000e+00 0.000000000000000000e+00 2.941176593303680420e-01 2.215663330078125000e+03 4.000000000000000000e+00 5.367565917968750000e+02
1.900000000000000000e+01 5.492923076923075314e+02 2.389806518554687500e+02 -5.225860595703125000e+00 4.381286203861236572e-01 0.000000000000000000e+00 1.361501953125000000e+03 2.000000000000000000e+00 7.484780883789062500e+01
0.000000000000000000e+00 1.623692307692307963e+02 1.673596649169921875e+02 -1.307369995117187500e+01 9.974555969238281250e-01 0.000000000000000000e+00 3.373629455566406250e+02 1.000000000000000000e+00 2.690282287597656250e+02
4.500000000000000000e+01 2.310230769230769852e+02 1.716154174804687500e+02 -9.834442138671875000e+00 9.067189693450927734e-01 0.000000000000000000e+00 1.051957885742187500e+03 4.000000000000000000e+00 1.433071441650390625e+02
0.000000000000000000e+00 1.191846153846153982e+02 1.082817993164062500e+02 -1.100152587890625000e+01 9.993316531181335449e-01 0.000000000000000000e+00 7.792543945312500000e+02 1.000000000000000000e+00 3.143374023437500000e+02
6.200000000000000000e+01 5.126615384615386120e+02 2.979802246093750000e+02 -1.408172607421875000e+00 9.999999776482582092e-03 5.882353186607360840e-01 1.345955200195312500e+03 4.000000000000000000e+00 1.295022827148437500e+03
6.100000000000000000e+01 6.831307692307692605e+02 4.020956420898437500e+02 -2.026367187500000000e+00 0.000000000000000000e+00 0.000000000000000000e+00 2.115519775390625000e+03 4.000000000000000000e+00 1.339120788574218750e+02
0.000000000000000000e+00 1.087461538461538311e+02 1.017704696655273438e+02 -1.074069213867187500e+01 9.986101984977722168e-01 0.000000000000000000e+00 8.478156738281250000e+02 1.000000000000000000e+00 1.487890777587890625e+02
2.000000000000000000e+01 4.159769230769231285e+02 2.999122619628906250e+02 -7.516967773437500000e+00 7.158634066581726074e-01 1.176470592617988586e-01 1.379600341796875000e+03 3.000000000000000000e+00 2.555708160400390625e+02
2.800000000000000000e+01 7.961461538461537657e+02 4.358418273925781250e+02 -1.933685302734375000e+00 9.999999776482582092e-03 0.000000000000000000e+00 2.059532470703125000e+03 3.000000000000000000e+00 2.560854492187500000e+02
1.300000000000000000e+01 2.638230769230769965e+02 1.743999328613281250e+02 -6.440490722656250000e+00 6.187936663627624512e-01 0.000000000000000000e+00 1.551165771484375000e+03 2.000000000000000000e+00 2.413191833496093750e+02
1.100000000000000000e+01 3.346923076923076792e+02 2.206356048583984375e+02 -9.467590332031250000e+00 9.382978081703186035e-01 0.000000000000000000e+00 1.077555664062500000e+03 2.000000000000000000e+00 4.077743835449218750e+02
7.000000000000000000e+00 8.020538461538463935e+02 1.306280975341796875e+02 -6.213317871093750000e+00 8.479424715042114258e-01 0.000000000000000000e+00 5.665960693359375000e+02 1.000000000000000000e+00 4.533025207519531250e+02
6.900000000000000000e+01 6.607692307692312852e+02 2.777459411621093750e+02 1.784759521484375000e+00 0.000000000000000000e+00 7.647058963775634766e-01 2.226291748046875000e+03 4.000000000000000000e+00 1.156654541015625000e+03
4.000000000000000000e+00 3.478923076923077815e+02 1.581641845703125000e+02 -5.889312744140625000e+00 5.407910346984863281e-01 0.000000000000000000e+00 8.320557861328125000e+02 1.000000000000000000e+00 4.301607131958007812e+01
2.700000000000000000e+01 4.286538461538460751e+02 1.536338958740234375e+02 -8.289062500000000000e+00 5.837388038635253906e-01 0.000000000000000000e+00 8.037288208007812500e+02 3.000000000000000000e+00 1.263062622070312500e+03
0.000000000000000000e+00 5.215538461538460524e+02 3.257198486328125000e+02 -9.097473144531250000e+00 9.044165611267089844e-01 0.000000000000000000e+00 9.423142089843750000e+02 1.000000000000000000e+00 1.530891113281250000e+02
5.300000000000000000e+01 9.231384615384613426e+02 3.144640502929687500e+02 -2.982330322265625000e+00 9.999999776482582092e-03 0.000000000000000000e+00 1.055198486328125000e+03 4.000000000000000000e+00 1.368506469726562500e+03
0.000000000000000000e+00 2.621692307692306940e+02 1.665225524902343750e+02 -1.308093261718750000e+01 9.993203282356262207e-01 0.000000000000000000e+00 3.446342468261718750e+02 1.000000000000000000e+00 3.533339843750000000e+02
6.100000000000000000e+01 2.598846153846155858e+02 1.645663604736328125e+02 -6.033294677734375000e+00 3.314141631126403809e-01 0.000000000000000000e+00 8.562212524414062500e+02 4.000000000000000000e+00 1.229137451171875000e+03
1.900000000000000000e+01 1.144846153846153953e+02 1.874584197998046875e+02 -7.984985351562500000e+00 8.596524000167846680e-01 8.235294222831726074e-01 1.178425170898437500e+03 2.000000000000000000e+00 6.888945312500000000e+02
1.900000000000000000e+01 3.928923076923077247e+02 2.562319946289062500e+02 -7.857147216796875000e+00 7.990825176239013672e-01 2.941176593303680420e-01 1.269390258789062500e+03 2.000000000000000000e+00 3.661414184570312500e+02
2.100000000000000000e+01 2.972923076923076451e+02 1.647606201171875000e+02 -7.576812744140625000e+00 6.302285790443420410e-01 0.000000000000000000e+00 1.220056152343750000e+03 3.000000000000000000e+00 2.441959533691406250e+02
0.000000000000000000e+00 2.141692307692307509e+02 1.701223907470703125e+02 -1.631085205078125000e+01 9.999930262565612793e-01 0.000000000000000000e+00 5.862956542968750000e+02 1.000000000000000000e+00 2.963647155761718750e+02
3.300000000000000000e+01 4.465230769230769283e+02 2.509973297119140625e+02 -5.963836669921875000e+00 2.905060648918151855e-01 2.941176593303680420e-01 7.911646118164062500e+02 3.000000000000000000e+00 1.539390747070312500e+03
2.000000000000000000e+00 1.690999999999999659e+02 1.837989654541015625e+02 -1.059960937500000000e+01 9.710782170295715332e-01 0.000000000000000000e+00 9.074611206054687500e+02 1.000000000000000000e+00 6.328632812500000000e+02
4.000000000000000000e+01 7.709461538461539476e+02 3.848157653808593750e+02 4.102111816406250000e+00 0.000000000000000000e+00 0.000000000000000000e+00 3.105143798828125000e+03 3.000000000000000000e+00 5.059528198242187500e+02
4.200000000000000000e+01 5.567230769230766327e+02 1.866910095214843750e+02 -2.517639160156250000e+00 0.000000000000000000e+00 0.000000000000000000e+00 1.216490600585937500e+03 3.000000000000000000e+00 1.281846557617187500e+03
3.600000000000000000e+01 5.367769230769231399e+02 2.909717712402343750e+02 -6.561431884765625000e+00 6.184244751930236816e-01 5.294117927551269531e-01 1.544037109375000000e+03 3.000000000000000000e+00 2.088924255371093750e+02
6.500000000000000000e+01 1.058792307692307986e+03 5.000729980468750000e+02 6.213073730468750000e-01 0.000000000000000000e+00 0.000000000000000000e+00 2.431188476562500000e+03 4.000000000000000000e+00 3.356127929687500000e+02
7.000000000000000000e+00 5.503846153846153584e+02 2.673769226074218750e+02 -1.616638183593750000e+00 0.000000000000000000e+00 0.000000000000000000e+00 1.657369506835937500e+03 1.000000000000000000e+00 1.301066162109375000e+03
8.000000000000000000e+00 5.127384615384614790e+02 3.123017272949218750e+02 3.228576660156250000e+00 0.000000000000000000e+00 4.705882370471954346e-01 2.576671142578125000e+03 1.000000000000000000e+00 7.544638061523437500e+02
3.000000000000000000e+00 2.310384615384615472e+02 2.071092529296875000e+02 -9.991668701171875000e+00 9.611125588417053223e-01 0.000000000000000000e+00 1.026695434570312500e+03 1.000000000000000000e+00 7.567796020507812500e+02
0.000000000000000000e+00 1.566230769230769795e+02 1.476707153320312500e+02 -1.092697143554687500e+01 9.861713051795959473e-01 0.000000000000000000e+00 8.295541381835937500e+02 1.000000000000000000e+00 5.282395629882812500e+02
6.900000000000000000e+01 2.013330769230769420e+03 6.548679809570312500e+02 1.109802246093750000e+00 0.000000000000000000e+00 0.000000000000000000e+00 1.738810668945312500e+03 4.000000000000000000e+00 8.625964355468750000e+02
6.000000000000000000e+01 1.081007692307691968e+03 4.964739074707031250e+02 -1.347473144531250000e+00 0.000000000000000000e+00 0.000000000000000000e+00 1.981365966796875000e+03 4.000000000000000000e+00 3.123943176269531250e+02
0.000000000000000000e+00 2.002692307692307736e+02 2.259051513671875000e+02 -1.120553588867187500e+01 9.978337287902832031e-01 0.000000000000000000e+00 9.092485961914062500e+02 1.000000000000000000e+00 1.223528564453125000e+03
4.900000000000000000e+01 7.268846153846153584e+02 3.765271301269531250e+02 2.952056884765625000e+00 0.000000000000000000e+00 0.000000000000000000e+00 3.080412841796875000e+03 4.000000000000000000e+00 2.957704467773437500e+02
1.200000000000000000e+01 2.694076923076922299e+02 1.941420440673828125e+02 -9.862426757812500000e+00 9.365684986114501953e-01 0.000000000000000000e+00 7.977390747070312500e+02 2.000000000000000000e+00 1.652934204101562500e+03
4.300000000000000000e+01 6.351461538461537657e+02 2.475987091064453125e+02 -6.930847167968750000e-01 0.000000000000000000e+00 0.000000000000000000e+00 2.456310302734375000e+03 3.000000000000000000e+00 2.854094543457031250e+02
1.200000000000000000e+01 3.344538461538463139e+02 2.256311340332031250e+02 -5.986358642578125000e+00 5.383345484733581543e-01 5.882352963089942932e-02 1.004420410156250000e+03 2.000000000000000000e+00 9.928727416992187500e+02
6.500000000000000000e+01 7.798307692307691923e+02 4.058307189941406250e+02 4.060852050781250000e+00 0.000000000000000000e+00 0.000000000000000000e+00 2.722876708984375000e+03 4.000000000000000000e+00 2.140089416503906250e+02
6.400000000000000000e+01 5.665384615384616609e+02 2.187722625732421875e+02 -7.917480468750000000e-01 0.000000000000000000e+00 1.176470592617988586e-01 1.633279907226562500e+03 4.000000000000000000e+00 9.322875976562500000e+02
4.000000000000000000e+00 5.187307692307691696e+02 3.263305969238281250e+02 -5.164306640625000000e+00 5.606896877288818359e-01 0.000000000000000000e+00 1.042663452148437500e+03 1.000000000000000000e+00 1.608623046875000000e+03
4.800000000000000000e+01 8.437615384615384073e+02 3.356692810058593750e+02 -4.638610839843750000e+00 2.471774220466613770e-01 2.941176593303680420e-01 7.588568115234375000e+02 4.000000000000000000e+00 8.328650512695312500e+02
0.000000000000000000e+00 2.615076923076923094e+02 1.828795166015625000e+02 -1.157189941406250000e+01 9.896250367164611816e-01 0.000000000000000000e+00 9.491709594726562500e+02 1.000000000000000000e+00 2.815269470214843750e+02
3.300000000000000000e+01 5.642615384615385210e+02 5.081518859863281250e+02 -4.077819824218750000e+00 2.207370400428771973e-01 0.000000000000000000e+00 8.361066894531250000e+02 3.000000000000000000e+00 1.308355346679687500e+03
2.000000000000000000e+00 2.503384615384615870e+02 2.439257202148437500e+02 -1.456695556640625000e+01 9.999775886535644531e-01 0.000000000000000000e+00 4.748189086914062500e+02 1.000000000000000000e+00 2.546412963867187500e+02
5.000000000000000000e+00 3.318692307692307395e+02 1.838915405273437500e+02 2.384399414062500000e+00 0.000000000000000000e+00 0.000000000000000000e+00 2.919778564453125000e+03 1.000000000000000000e+00 7.526983032226562500e+02
4.000000000000000000e+00 4.361153846153846985e+02 2.113619079589843750e+02 4.732818603515625000e+00 0.000000000000000000e+00 0.000000000000000000e+00 3.349326660156250000e+03 1.000000000000000000e+00 6.726934814453125000e+02
2.700000000000000000e+01 3.238846153846155289e+02 1.805830535888671875e+02 -6.262359619140625000e+00 1.534507572650909424e-01 1.058823585510253906e+00 1.162170166015625000e+03 3.000000000000000000e+00 2.372433624267578125e+02
4.000000000000000000e+00 5.141461538461537657e+02 2.631836853027343750e+02 -2.521057128906250000e+00 9.999999776482582092e-03 0.000000000000000000e+00 1.406486450195312500e+03 1.000000000000000000e+00 1.376525211334228516e+01
7.100000000000000000e+01 1.105092307692307713e+03 5.009942626953125000e+02 4.610900878906250000e-01 0.000000000000000000e+00 0.000000000000000000e+00 2.385421875000000000e+03 4.000000000000000000e+00 2.138042907714843750e+02
4.900000000000000000e+01 4.911769230769231740e+02 2.627610473632812500e+02 -3.282196044921875000e+00 1.218200922012329102e-01 0.000000000000000000e+00 1.025120605468750000e+03 4.000000000000000000e+00 1.226562744140625000e+03
1.000000000000000000e+01 4.800000000000001137e+02 3.747461853027343750e+02 -5.871856689453125000e+00 4.689984321594238281e-01 0.000000000000000000e+00 7.668782348632812500e+02 2.000000000000000000e+00 1.492357055664062500e+03
1.000000000000000000e+00 4.843846153846150173e+02 2.346166687011718750e+02 -1.113116455078125000e+01 9.913160800933837891e-01 0.000000000000000000e+00 6.080396118164062500e+02 1.000000000000000000e+00 3.272679443359375000e+02
1.500000000000000000e+01 3.405615384615384187e+02 2.424691009521484375e+02 -9.561279296875000000e+00 9.623315334320068359e-01 0.000000000000000000e+00 1.003793579101562500e+03 2.000000000000000000e+00 3.608225631713867188e+01
3.100000000000000000e+01 4.935076923076919684e+02 3.199373779296875000e+02 -9.580993652343750000e-01 0.000000000000000000e+00 1.000000000000000000e+00 1.532555053710937500e+03 3.000000000000000000e+00 1.152114257812500000e+03
1.000000000000000000e+00 1.784846153846154095e+02 9.941786193847656250e+01 -9.876220703125000000e+00 9.674298763275146484e-01 0.000000000000000000e+00 1.034067382812500000e+03 1.000000000000000000e+00 1.328704376220703125e+02
5.800000000000000000e+01 7.699230769230767919e+02 4.263926086425781250e+02 -1.690063476562500000e+00 9.999999776482582092e-03 6.470588445663452148e-01 2.125023681640625000e+03 4.000000000000000000e+00 2.777930603027343750e+02
1.800000000000000000e+01 5.427461538461537884e+02 2.272789916992187500e+02 -5.840393066406250000e+00 4.518590569496154785e-01 0.000000000000000000e+00 1.168618530273437500e+03 2.000000000000000000e+00 3.813983154296875000e+01
2.800000000000000000e+01 6.189230769230769056e+02 1.920137176513671875e+02 -4.422485351562500000e+00 3.076564967632293701e-01 2.941176593303680420e-01 1.743073120117187500e+03 3.000000000000000000e+00 1.340041503906250000e+02
5.000000000000000000e+00 2.472692307692307736e+02 1.650508422851562500e+02 -1.373330688476562500e+01 9.995656609535217285e-01 0.000000000000000000e+00 8.034320678710937500e+02 1.000000000000000000e+00 1.558375244140625000e+02
4.600000000000000000e+01 1.932076923076922981e+02 2.670271911621093750e+02 -7.015045166015625000e+00 3.990794718265533447e-01 1.058823585510253906e+00 1.192135009765625000e+03 4.000000000000000000e+00 4.897200012207031250e+02
5.600000000000000000e+01 7.732615384615387484e+02 4.053438110351562500e+02 5.447296142578125000e+00 0.000000000000000000e+00 0.000000000000000000e+00 2.970255859375000000e+03 4.000000000000000000e+00 2.781997070312500000e+02
2.000000000000000000e+01 5.440692307692310123e+02 1.370878601074218750e+02 -3.955383300781250000e-01 0.000000000000000000e+00 0.000000000000000000e+00 2.481371826171875000e+03 3.000000000000000000e+00 2.604508972167968750e+02
3.200000000000000000e+01 2.964076923076923435e+02 2.230251617431640625e+02 -8.941680908203125000e+00 6.712243556976318359e-01 0.000000000000000000e+00 1.147816406250000000e+03 3.000000000000000000e+00 2.689373168945312500e+02
7.100000000000000000e+01 8.275461538461541977e+02 4.507461242675781250e+02 -1.132202148437500000e+00 0.000000000000000000e+00 0.000000000000000000e+00 2.268111816406250000e+03 4.000000000000000000e+00 2.756149902343750000e+02
2.000000000000000000e+00 4.600384615384618314e+02 3.309536132812500000e+02 3.687500000000000000e+00 0.000000000000000000e+00 1.117647051811218262e+00 2.709930175781250000e+03 1.000000000000000000e+00 8.644212646484375000e+02
1.200000000000000000e+01 2.822769230769229694e+02 2.128626861572265625e+02 -8.914672851562500000e+00 7.787429690361022949e-01 2.941176593303680420e-01 1.140616455078125000e+03 2.000000000000000000e+00 3.328119812011718750e+02
9.000000000000000000e+00 4.362153846153845507e+02 2.108714904785156250e+02 4.645599365234375000e+00 0.000000000000000000e+00 0.000000000000000000e+00 3.332659667968750000e+03 1.000000000000000000e+00 5.606432495117187500e+02
4.000000000000000000e+00 2.626076923076922185e+02 2.250690460205078125e+02 -1.487670898437500000e+01 9.999831914901733398e-01 0.000000000000000000e+00 4.641170349121093750e+02 1.000000000000000000e+00 3.539129638671875000e+02
0.000000000000000000e+00 2.040769230769230660e+02 9.498194885253906250e+01 -1.259771728515625000e+01 9.970815181732177734e-01 0.000000000000000000e+00 8.450148925781250000e+02 1.000000000000000000e+00 3.445542297363281250e+02
2.000000000000000000e+01 2.035807692307692832e+03 5.260311889648437500e+02 3.881134033203125000e+00 0.000000000000000000e+00 0.000000000000000000e+00 2.000029052734375000e+03 3.000000000000000000e+00 1.238278198242187500e+03
5.400000000000000000e+01 9.981384615384614563e+02 3.966619567871093750e+02 3.103057861328125000e+00 0.000000000000000000e+00 0.000000000000000000e+00 2.724597656250000000e+03 4.000000000000000000e+00 2.296415710449218750e+02
3.500000000000000000e+01 6.674153846153848235e+02 2.610229187011718750e+02 -2.381195068359375000e+00 9.999999776482582092e-03 7.647058963775634766e-01 2.174449707031250000e+03 3.000000000000000000e+00 3.272039184570312500e+02
0.000000000000000000e+00 3.018923076923077247e+02 1.594851989746093750e+02 -1.560498046875000000e+01 9.997614026069641113e-01 0.000000000000000000e+00 2.361725921630859375e+02 1.000000000000000000e+00 6.063370971679687500e+02
7.000000000000000000e+00 4.640846153846153470e+02 5.057530822753906250e+02 -3.390167236328125000e+00 2.637585401535034180e-01 0.000000000000000000e+00 9.057973632812500000e+02 1.000000000000000000e+00 1.345238769531250000e+03
5.000000000000000000e+00 2.629307692307692719e+02 2.054582366943359375e+02 -1.009481811523437500e+01 9.677413702011108398e-01 0.000000000000000000e+00 1.006143554687500000e+03 1.000000000000000000e+00 4.107275695800781250e+02
5.900000000000000000e+01 4.455769230769231513e+02 2.373696136474609375e+02 -5.665374755859375000e+00 2.404202222824096680e-01 0.000000000000000000e+00 1.286748046875000000e+03 4.000000000000000000e+00 1.352464904785156250e+02
6.200000000000000000e+01 4.372153846153847780e+02 2.351145172119140625e+02 -1.615570068359375000e+00 9.999999776482582092e-03 2.352941185235977173e-01 1.902631225585937500e+03 4.000000000000000000e+00 6.974038696289062500e+02
0.000000000000000000e+00 1.827769230769231399e+02 9.903377532958984375e+01 -1.225570678710937500e+01 9.882949590682983398e-01 0.000000000000000000e+00 7.898198242187500000e+02 1.000000000000000000e+00 2.235233764648437500e+02
1.000000000000000000e+00 2.643307692307691923e+02 1.899381408691406250e+02 -9.729644775390625000e+00 9.554490447044372559e-01 0.000000000000000000e+00 1.069248046875000000e+03 1.000000000000000000e+00 4.376830749511718750e+02
4.100000000000000000e+01 9.849461538461539476e+02 4.316396484375000000e+02 -1.128448486328125000e+00 0.000000000000000000e+00 3.529411852359771729e-01 2.030301879882812500e+03 3.000000000000000000e+00 1.697091369628906250e+02
7.000000000000000000e+00 3.410615384615384187e+02 2.020995330810546875e+02 -5.926971435546875000e+00 8.436952829360961914e-01 0.000000000000000000e+00 1.149271850585937500e+03 1.000000000000000000e+00 9.980037841796875000e+02
2.100000000000000000e+01 7.359230769230772466e+02 3.925539855957031250e+02 -6.777496337890625000e+00 6.969789862632751465e-01 0.000000000000000000e+00 1.138621948242187500e+03 3.000000000000000000e+00 4.116336059570312500e+02
4.600000000000000000e+01 4.345769230769232649e+02 2.097776947021484375e+02 -7.248229980468750000e-01 0.000000000000000000e+00 2.941176593303680420e-01 2.202342041015625000e+03 4.000000000000000000e+00 5.570916137695312500e+02
2.300000000000000000e+01 4.497384615384616495e+02 1.929122772216796875e+02 -5.595886230468750000e+00 7.329802513122558594e-01 0.000000000000000000e+00 1.314181030273437500e+03 3.000000000000000000e+00 1.046514282226562500e+03
3.900000000000000000e+01 4.153999999999999773e+02 3.151876220703125000e+02 -7.297668457031250000e+00 7.607476711273193359e-01 0.000000000000000000e+00 1.400489013671875000e+03 3.000000000000000000e+00 3.592011413574218750e+02
0.000000000000000000e+00 5.695384615384615756e+01 1.172733459472656250e+02 -1.257943725585937500e+01 9.997748136520385742e-01 0.000000000000000000e+00 8.827716064453125000e+02 1.000000000000000000e+00 1.062579833984375000e+03
2.000000000000000000e+01 7.163846153846154721e+02 3.895226440429687500e+02 -7.067291259765625000e+00 6.452643871307373047e-01 0.000000000000000000e+00 1.045122070312500000e+03 3.000000000000000000e+00 2.649891052246093750e+02
4.000000000000000000e+00 1.897153846153846644e+02 1.778625183105468750e+02 -1.040960693359375000e+01 9.824232459068298340e-01 3.529411852359771729e-01 9.851940917968750000e+02 1.000000000000000000e+00 6.186207275390625000e+02
4.400000000000000000e+01 7.731000000000002501e+02 3.262302856445312500e+02 -8.013305664062500000e-01 9.999999776482582092e-03 5.882353186607360840e-01 2.205563232421875000e+03 3.000000000000000000e+00 2.814938964843750000e+02
0.000000000000000000e+00 2.425307692307692093e+02 1.731633758544921875e+02 -1.128359985351562500e+01 9.889971017837524414e-01 0.000000000000000000e+00 9.143279418945312500e+02 1.000000000000000000e+00 3.393076782226562500e+02
0.000000000000000000e+00 4.220153846153847326e+02 2.213567047119140625e+02 -1.209732055664062500e+01 9.995278120040893555e-01 0.000000000000000000e+00 3.418182678222656250e+02 1.000000000000000000e+00 7.584247436523437500e+02
0.000000000000000000e+00 1.050900000000000091e+03 6.049656982421875000e+02 4.437805175781250000e+00 1.663320809602737427e-01 0.000000000000000000e+00 1.825498168945312500e+03 1.000000000000000000e+00 7.977740478515625000e+02
4.000000000000000000e+00 6.022923076923077588e+02 3.415584106445312500e+02 -2.978179931640625000e+00 9.999999776482582092e-03 0.000000000000000000e+00 1.230428100585937500e+03 1.000000000000000000e+00 1.801827392578125000e+02
4.200000000000000000e+01 6.341076923076924459e+02 3.129905395507812500e+02 -4.026885986328125000e+00 1.847496181726455688e-01 2.352941185235977173e-01 1.936530517578125000e+03 3.000000000000000000e+00 2.205719451904296875e+02
6.700000000000000000e+01 4.531846153846153697e+02 4.517094116210937500e+02 -5.148193359375000000e+00 1.107365563511848450e-01 0.000000000000000000e+00 7.747409057617187500e+02 4.000000000000000000e+00 9.389863891601562500e+02
9.000000000000000000e+00 2.510153846153845905e+02 1.540092010498046875e+02 -1.045779418945312500e+01 9.763547182083129883e-01 0.000000000000000000e+00 1.015586059570312500e+03 1.000000000000000000e+00 4.551606445312500000e+02
2.100000000000000000e+01 5.457769230769229125e+02 2.858876037597656250e+02 -6.080718994140625000e+00 5.228346586227416992e-01 5.294117927551269531e-01 1.650115722656250000e+03 3.000000000000000000e+00 2.704757385253906250e+02
2.500000000000000000e+01 4.702000000000000455e+02 1.316491394042968750e+02 -7.620178222656250000e+00 6.549277305603027344e-01 8.235294222831726074e-01 8.726093750000000000e+02 3.000000000000000000e+00 1.436080200195312500e+03
1.600000000000000000e+01 9.649076923076922867e+02 4.768474426269531250e+02 -4.936614990234375000e+00 3.820409178733825684e-01 2.941176593303680420e-01 1.356875854492187500e+03 2.000000000000000000e+00 6.478508300781250000e+02
5.300000000000000000e+01 6.555769230769230944e+02 2.979230041503906250e+02 -2.896820068359375000e+00 9.999999776482582092e-03 5.294117927551269531e-01 2.104359375000000000e+03 4.000000000000000000e+00 3.032281799316406250e+02
0.000000000000000000e+00 3.075461538461539135e+02 1.893889465332031250e+02 -1.416326904296875000e+01 9.969742894172668457e-01 0.000000000000000000e+00 2.012322082519531250e+02 1.000000000000000000e+00 3.647133178710937500e+02
5.600000000000000000e+01 7.007461538461537884e+02 3.464907531738281250e+02 -1.988128662109375000e+00 9.999999776482582092e-03 0.000000000000000000e+00 2.025454711914062500e+03 4.000000000000000000e+00 1.213530960083007812e+02
5.300000000000000000e+01 3.416307692307691468e+02 1.824026641845703125e+02 -4.410156250000000000e+00 2.420052438974380493e-01 0.000000000000000000e+00 1.846308227539062500e+03 4.000000000000000000e+00 2.138138122558593750e+02
0.000000000000000000e+00 1.956384615384615131e+02 1.433946533203125000e+02 -1.472796630859375000e+01 9.998309016227722168e-01 0.000000000000000000e+00 6.893651733398437500e+02 1.000000000000000000e+00 4.007853698730468750e+01
6.900000000000000000e+01 4.809923076923080316e+02 1.952597198486328125e+02 -4.485137939453125000e+00 9.999999776482582092e-03 1.176470592617988586e-01 1.417282470703125000e+03 4.000000000000000000e+00 6.688032226562500000e+02
1.100000000000000000e+01 3.488307692307690786e+02 1.861326446533203125e+02 3.950897216796875000e+00 0.000000000000000000e+00 3.529411852359771729e-01 3.031646484375000000e+03 2.000000000000000000e+00 1.215498535156250000e+03
5.100000000000000000e+01 1.197900000000001000e+03 5.579771118164062500e+02 2.170196533203125000e+00 0.000000000000000000e+00 2.941176593303680420e-01 2.463142578125000000e+03 4.000000000000000000e+00 1.238608398437500000e+02
4.000000000000000000e+00 1.577992307692307577e+03 3.419484252929687500e+02 7.959289550781250000e-01 1.079351082444190979e-01 0.000000000000000000e+00 1.335023559570312500e+03 1.000000000000000000e+00 1.141264892578125000e+03
3.100000000000000000e+01 4.349230769230770193e+02 2.371553955078125000e+02 -3.042419433593750000e+00 1.078123003244400024e-01 5.882353186607360840e-01 1.977626220703125000e+03 3.000000000000000000e+00 4.911202697753906250e+02
5.400000000000000000e+01 6.686076923076925596e+02 3.093426818847656250e+02 9.671020507812500000e-02 0.000000000000000000e+00 0.000000000000000000e+00 2.592070556640625000e+03 4.000000000000000000e+00 3.521966857910156250e+02
1.100000000000000000e+01 3.122230769230769170e+02 1.887213745117187500e+02 -1.057424926757812500e+01 9.813647270202636719e-01 0.000000000000000000e+00 9.966146240234375000e+02 2.000000000000000000e+00 5.297933578491210938e+01
0.000000000000000000e+00 1.457230769230769170e+02 2.269743041992187500e+02 -1.433779907226562500e+01 9.998316168785095215e-01 0.000000000000000000e+00 5.953813476562500000e+02 1.000000000000000000e+00 2.920822143554687500e+02
3.000000000000000000e+01 8.828384615384610470e+02 4.630402221679687500e+02 -1.417572021484375000e+00 0.000000000000000000e+00 0.000000000000000000e+00 1.013712036132812500e+03 3.000000000000000000e+00 1.728789306640625000e+03
3.000000000000000000e+00 1.777615384615384357e+02 3.058406066894531250e+01 -7.439331054687500000e+00 9.603736400604248047e-01 0.000000000000000000e+00 9.973152465820312500e+02 1.000000000000000000e+00 1.377778564453125000e+03
0.000000000000000000e+00 2.291384615384615415e+02 1.958671264648437500e+02 -1.072885131835937500e+01 9.886921048164367676e-01 0.000000000000000000e+00 9.728546752929687500e+02 1.000000000000000000e+00 4.708465576171875000e+02
3.700000000000000000e+01 5.003769230769229921e+02 2.817623291015625000e+02 -5.618499755859375000e+00 4.098898172378540039e-01 0.000000000000000000e+00 1.700528686523437500e+03 3.000000000000000000e+00 2.804964294433593750e+02
1.200000000000000000e+01 7.492538461538460979e+02 3.690603942871093750e+02 -5.885223388671875000e+00 5.930857658386230469e-01 0.000000000000000000e+00 1.315744018554687500e+03 2.000000000000000000e+00 4.021051635742187500e+02
6.000000000000000000e+01 5.597230769230768601e+02 2.837608032226562500e+02 -4.855651855468750000e+00 2.679323852062225342e-01 5.882353186607360840e-01 1.845931640625000000e+03 4.000000000000000000e+00 2.084330596923828125e+02
5.400000000000000000e+01 7.713999999999997499e+02 3.666658630371093750e+02 4.982727050781250000e+00 0.000000000000000000e+00 0.000000000000000000e+00 3.007521240234375000e+03 4.000000000000000000e+00 4.698607482910156250e+02
4.000000000000000000e+00 5.496923076923075087e+02 2.279071807861328125e+02 -1.675201416015625000e+00 1.205691844224929810e-01 0.000000000000000000e+00 1.317382080078125000e+03 1.000000000000000000e+00 1.476548461914062500e+02
1.000000000000000000e+00 6.344230769230772466e+02 3.560100402832031250e+02 -7.177886962890625000e+00 8.152818679809570312e-01 0.000000000000000000e+00 1.118751220703125000e+03 1.000000000000000000e+00 2.195699615478515625e+02
0.000000000000000000e+00 2.155538461538461377e+02 1.750488586425781250e+02 -1.684082031250000000e+01 9.999830126762390137e-01 0.000000000000000000e+00 5.203942260742187500e+02 1.000000000000000000e+00 1.608981628417968750e+02
0.000000000000000000e+00 2.313692307692308532e+02 1.675347137451171875e+02 -1.217025756835937500e+01 9.956965446472167969e-01 0.000000000000000000e+00 9.081004638671875000e+02 1.000000000000000000e+00 1.512423248291015625e+02
7.000000000000000000e+00 1.121976923076923413e+03 5.909415283203125000e+02 3.223968505859375000e+00 0.000000000000000000e+00 0.000000000000000000e+00 2.139426757812500000e+03 1.000000000000000000e+00 4.890669860839843750e+02
2.100000000000000000e+01 3.791307692307692037e+02 2.647839660644531250e+02 -8.252655029296875000e+00 8.490469455718994141e-01 5.882353186607360840e-01 1.264364501953125000e+03 3.000000000000000000e+00 3.417248229980468750e+02
5.400000000000000000e+01 7.210076923076928779e+02 2.795082397460937500e+02 1.575866699218750000e+00 0.000000000000000000e+00 0.000000000000000000e+00 2.861714111328125000e+03 4.000000000000000000e+00 4.182876586914062500e+02
1.400000000000000000e+01 5.981923076923079634e+02 3.618207397460937500e+02 -7.251220703125000000e+00 8.429519534111022949e-01 0.000000000000000000e+00 1.075756347656250000e+03 2.000000000000000000e+00 1.830498962402343750e+02
1.000000000000000000e+00 1.754461538461539192e+02 1.773803253173828125e+02 -1.084545898437500000e+01 9.874864816665649414e-01 0.000000000000000000e+00 9.203158569335937500e+02 1.000000000000000000e+00 5.663470458984375000e+02
5.000000000000000000e+01 2.655153846153846189e+02 2.297537841796875000e+02 -7.926788330078125000e+00 8.210883140563964844e-01 0.000000000000000000e+00 1.244849609375000000e+03 4.000000000000000000e+00 2.411331176757812500e+02
4.100000000000000000e+01 8.124769230769229580e+02 4.377636108398437500e+02 -2.055480957031250000e+00 9.999999776482582092e-03 0.000000000000000000e+00 2.026786865234375000e+03 3.000000000000000000e+00 2.616852416992187500e+02
4.700000000000000000e+01 7.451692307692311488e+02 3.996348571777343750e+02 4.318328857421875000e+00 0.000000000000000000e+00 0.000000000000000000e+00 3.059632812500000000e+03 4.000000000000000000e+00 5.262229003906250000e+02
1.600000000000000000e+01 8.086769230769233445e+02 6.375072631835937500e+02 -2.780792236328125000e+00 0.000000000000000000e+00 0.000000000000000000e+00 8.398377075195312500e+02 2.000000000000000000e+00 7.040192871093750000e+02
3.700000000000000000e+01 3.180923076923078270e+02 1.897359313964843750e+02 -4.025054931640625000e+00 2.156595587730407715e-01 0.000000000000000000e+00 1.937884643554687500e+03 3.000000000000000000e+00 2.428545684814453125e+02
6.000000000000000000e+01 1.000984615384615381e+03 4.138882446289062500e+02 -3.194488525390625000e+00 0.000000000000000000e+00 2.352941185235977173e-01 1.270723754882812500e+03 4.000000000000000000e+00 1.184969482421875000e+03
5.000000000000000000e+00 3.212615384615385210e+02 1.234337463378906250e+02 1.646820068359375000e+00 0.000000000000000000e+00 0.000000000000000000e+00 2.568379150390625000e+03 1.000000000000000000e+00 7.534255981445312500e+02
0.000000000000000000e+00 3.658076923076923208e+02 2.246299133300781250e+02 -1.170108032226562500e+01 9.971028566360473633e-01 0.000000000000000000e+00 5.423298950195312500e+02 1.000000000000000000e+00 3.843536376953125000e+02
3.100000000000000000e+01 3.673846153846153584e+02 2.178907470703125000e+02 -4.962921142578125000e+00 4.506655335426330566e-01 6.470588445663452148e-01 1.621090454101562500e+03 3.000000000000000000e+00 4.327191772460937500e+02
0.000000000000000000e+00 1.749615384615385096e+02 1.522742462158203125e+02 -1.140347290039062500e+01 9.979306459426879883e-01 0.000000000000000000e+00 7.694262084960937500e+02 1.000000000000000000e+00 7.177103881835937500e+02
5.200000000000000000e+01 4.521692307692306940e+02 2.432552642822265625e+02 -5.274871826171875000e+00 1.475440263748168945e-01 2.352941185235977173e-01 1.327655395507812500e+03 4.000000000000000000e+00 1.517576141357421875e+02
4.200000000000000000e+01 7.221846153846155403e+02 2.791447753906250000e+02 1.577850341796875000e+00 0.000000000000000000e+00 0.000000000000000000e+00 2.843711425781250000e+03 3.000000000000000000e+00 4.110904235839843750e+02
0.000000000000000000e+00 1.636153846153846985e+02 2.136987609863281250e+02 -1.188208007812500000e+01 9.995194673538208008e-01 0.000000000000000000e+00 9.880205688476562500e+02 1.000000000000000000e+00 1.269065917968750000e+03
1.000000000000000000e+01 2.680076923076923094e+02 1.911196136474609375e+02 -1.532376098632812500e+01 9.997176527976989746e-01 0.000000000000000000e+00 2.712928466796875000e+02 2.000000000000000000e+00 3.603870849609375000e+02
0.000000000000000000e+00 3.988461538461539817e+02 2.293941955566406250e+02 -1.152008056640625000e+01 9.979649186134338379e-01 0.000000000000000000e+00 5.130993652343750000e+02 1.000000000000000000e+00 5.359435424804687500e+02
4.500000000000000000e+01 3.777384615384617064e+02 1.859922637939453125e+02 -5.946929931640625000e+00 1.440621763467788696e-01 5.294117927551269531e-01 1.220130493164062500e+03 4.000000000000000000e+00 1.960706939697265625e+02
4.600000000000000000e+01 4.000692307692306713e+02 1.868583526611328125e+02 -3.127502441406250000e+00 2.695992887020111084e-01 0.000000000000000000e+00 1.837411987304687500e+03 4.000000000000000000e+00 6.491655883789062500e+02
6.500000000000000000e+01 7.798307692307691923e+02 4.058307189941406250e+02 4.060852050781250000e+00 0.000000000000000000e+00 0.000000000000000000e+00 2.722876708984375000e+03 4.000000000000000000e+00 2.140089416503906250e+02
4.200000000000000000e+01 7.836615384615383846e+02 4.328243103027343750e+02 -1.811859130859375000e+00 9.999999776482582092e-03 0.000000000000000000e+00 2.092278076171875000e+03 3.000000000000000000e+00 2.619602050781250000e+02
2.800000000000000000e+01 1.349792307692308668e+03 5.187103881835937500e+02 2.522735595703125000e+00 0.000000000000000000e+00 0.000000000000000000e+00 2.608261230468750000e+03 3.000000000000000000e+00 1.620578002929687500e+02
0.000000000000000000e+00 1.801384615384614847e+02 1.838321380615234375e+02 -1.170480346679687500e+01 9.980064034461975098e-01 0.000000000000000000e+00 9.147270507812500000e+02 1.000000000000000000e+00 1.046111816406250000e+03
0.000000000000000000e+00 2.956846153846154266e+02 1.721781311035156250e+02 -1.442358398437500000e+01 9.995045065879821777e-01 0.000000000000000000e+00 3.390964050292968750e+02 1.000000000000000000e+00 4.633370971679687500e+02
1.200000000000000000e+01 5.357923076923077588e+02 2.115757293701171875e+02 -4.371063232421875000e+00 1.327719688415527344e-01 0.000000000000000000e+00 1.230676513671875000e+03 2.000000000000000000e+00 3.958668212890625000e+02
2.600000000000000000e+01 5.654769230769231854e+02 2.574324340820312500e+02 -5.250091552734375000e+00 5.517507195472717285e-01 2.352941185235977173e-01 1.555587158203125000e+03 3.000000000000000000e+00 1.658209228515625000e+02
0.000000000000000000e+00 1.825923076923076849e+02 1.229276885986328125e+02 -1.339675903320312500e+01 9.996779561042785645e-01 0.000000000000000000e+00 7.402438964843750000e+02 1.000000000000000000e+00 1.155310440063476562e+02
1.700000000000000000e+01 2.370076923076923094e+02 1.362906951904296875e+02 -9.239990234375000000e+00 8.977235555648803711e-01 0.000000000000000000e+00 1.148945190429687500e+03 2.000000000000000000e+00 2.406847686767578125e+02
2.000000000000000000e+00 5.180923076923074859e+02 3.387710876464843750e+02 -8.901184082031250000e+00 9.099771380424499512e-01 0.000000000000000000e+00 9.438785400390625000e+02 1.000000000000000000e+00 1.543742523193359375e+02
1.000000000000000000e+00 3.479153846153845961e+02 1.940204772949218750e+02 3.724853515625000000e+00 0.000000000000000000e+00 7.647058963775634766e-01 3.139726562500000000e+03 1.000000000000000000e+00 9.481448364257812500e+02
2.500000000000000000e+01 8.333153846153848008e+02 4.813179321289062500e+02 -2.886352539062500000e+00 9.999999776482582092e-03 6.470588445663452148e-01 1.863337646484375000e+03 3.000000000000000000e+00 3.105252075195312500e+02
5.500000000000000000e+01 8.265538461538460524e+02 4.966147766113281250e+02 -3.440185546875000000e+00 1.238401085138320923e-01 7.058823704719543457e-01 1.768255493164062500e+03 4.000000000000000000e+00 3.234350585937500000e+02
3.000000000000000000e+01 4.821461538461540499e+02 2.228186340332031250e+02 -6.774139404296875000e+00 4.763070642948150635e-01 2.941176593303680420e-01 7.595628051757812500e+02 3.000000000000000000e+00 1.673469726562500000e+03
5.700000000000000000e+01 4.539230769230770761e+02 1.883252258300781250e+02 -1.098236083984375000e+00 0.000000000000000000e+00 2.941176593303680420e-01 2.203692871093750000e+03 4.000000000000000000e+00 5.468754272460937500e+02
1.000000000000000000e+00 8.220538461538463935e+02 4.623785400390625000e+02 -5.185241699218750000e-01 1.162906810641288757e-01 0.000000000000000000e+00 1.319087768554687500e+03 1.000000000000000000e+00 8.843853149414062500e+02
1.200000000000000000e+01 1.085969230769231444e+03 4.726251831054687500e+02 -1.491485595703125000e+00 9.999999776482582092e-03 5.882353186607360840e-01 1.587677124023437500e+03 2.000000000000000000e+00 3.662077026367187500e+02
4.000000000000000000e+00 3.160153846153846757e+02 1.694391784667968750e+02 2.825256347656250000e+00 0.000000000000000000e+00 0.000000000000000000e+00 2.952128662109375000e+03 1.000000000000000000e+00 7.530700683593750000e+02
5.900000000000000000e+01 1.175369230769231308e+03 5.247181396484375000e+02 -7.738342285156250000e-01 9.999999776482582092e-03 0.000000000000000000e+00 1.500015625000000000e+03 4.000000000000000000e+00 3.426024475097656250e+02
0.000000000000000000e+00 1.909307692307693856e+02 1.498984832763671875e+02 -1.202325439453125000e+01 9.722321629524230957e-01 0.000000000000000000e+00 8.453916015625000000e+02 1.000000000000000000e+00 3.586343994140625000e+02
5.100000000000000000e+01 1.197900000000001000e+03 5.579771118164062500e+02 2.170196533203125000e+00 0.000000000000000000e+00 2.941176593303680420e-01 2.463142578125000000e+03 4.000000000000000000e+00 1.238608398437500000e+02
5.200000000000000000e+01 4.059769230769231285e+02 2.246019592285156250e+02 -2.561370849609375000e+00 1.467883437871932983e-01 2.941176593303680420e-01 1.879222167968750000e+03 4.000000000000000000e+00 6.636641845703125000e+02
7.000000000000000000e+00 1.084300000000000182e+03 6.091499633789062500e+02 -9.727783203125000000e-01 0.000000000000000000e+00 5.882352963089942932e-02 1.087398925781250000e+03 1.000000000000000000e+00 5.696153564453125000e+02
5.700000000000000000e+01 1.027653846153846189e+03 4.287598571777343750e+02 -3.522369384765625000e+00 1.480740904808044434e-01 0.000000000000000000e+00 1.588810791015625000e+03 4.000000000000000000e+00 4.583989257812500000e+02
4.100000000000000000e+01 8.539461538461536065e+02 4.066480407714843750e+02 9.034118652343750000e-01 0.000000000000000000e+00 0.000000000000000000e+00 2.553930175781250000e+03 3.000000000000000000e+00 4.053765563964843750e+02
3.100000000000000000e+01 5.106615384615384983e+02 3.029192199707031250e+02 -6.875762939453125000e+00 7.185564637184143066e-01 2.941176593303680420e-01 1.476593261718750000e+03 3.000000000000000000e+00 2.929223632812500000e+02
1.000000000000000000e+00 1.839461538461538623e+02 1.272592010498046875e+02 -1.016802978515625000e+01 9.858712553977966309e-01 0.000000000000000000e+00 8.427550659179687500e+02 1.000000000000000000e+00 2.676393127441406250e+02
1.900000000000000000e+01 3.787153846153845507e+02 2.552829284667968750e+02 -8.093231201171875000e+00 8.081245422363281250e-01 0.000000000000000000e+00 1.252512573242187500e+03 2.000000000000000000e+00 3.360000000000000000e+02
3.600000000000000000e+01 2.473846153846153868e+02 1.084776535034179688e+02 -8.964202880859375000e+00 8.225607872009277344e-01 1.176470592617988586e-01 1.167410034179687500e+03 3.000000000000000000e+00 5.628383255004882812e+01
5.000000000000000000e+01 3.832923076923077588e+02 1.851810150146484375e+02 -3.101501464843750000e+00 2.452452182769775391e-01 5.882353186607360840e-01 1.881078491210937500e+03 4.000000000000000000e+00 6.103500976562500000e+02
4.500000000000000000e+01 5.104000000000000341e+02 2.915759582519531250e+02 -3.442413330078125000e+00 1.273780614137649536e-01 0.000000000000000000e+00 2.045252807617187500e+03 4.000000000000000000e+00 2.120570983886718750e+02
0.000000000000000000e+00 1.394153846153846814e+02 1.152822875976562500e+02 -1.048306274414062500e+01 9.990305900573730469e-01 0.000000000000000000e+00 1.045780517578125000e+03 1.000000000000000000e+00 9.889522094726562500e+02
3.000000000000000000e+00 4.590230769230770989e+02 2.890202331542968750e+02 -6.315551757812500000e+00 8.078095912933349609e-01 0.000000000000000000e+00 1.002893737792968750e+03 1.000000000000000000e+00 1.097791992187500000e+03
1.300000000000000000e+01 2.754692307692307622e+02 1.894775695800781250e+02 -7.622436523437500000e+00 9.142528772354125977e-01 2.941176593303680420e-01 1.220186401367187500e+03 2.000000000000000000e+00 4.097419738769531250e+02
0.000000000000000000e+00 2.517692307692307736e+02 1.684953308105468750e+02 -1.223483276367187500e+01 9.964865446090698242e-01 0.000000000000000000e+00 9.111152343750000000e+02 1.000000000000000000e+00 1.347801513671875000e+02
9.000000000000000000e+00 3.317153846153846075e+02 2.121929931640625000e+02 -8.298706054687500000e+00 8.885127305984497070e-01 0.000000000000000000e+00 1.164671875000000000e+03 1.000000000000000000e+00 4.246683654785156250e+02
2.900000000000000000e+01 5.386230769230768374e+02 2.670494079589843750e+02 -4.140045166015625000e+00 5.423872470855712891e-01 5.882352963089942932e-02 1.308436767578125000e+03 3.000000000000000000e+00 1.342520629882812500e+03
3.400000000000000000e+01 7.832538461538462116e+02 3.831689453125000000e+02 -5.126312255859375000e+00 4.209083616733551025e-01 3.529411852359771729e-01 1.461214233398437500e+03 3.000000000000000000e+00 4.429633789062500000e+02
6.000000000000000000e+00 4.099461538461539476e+02 2.086399230957031250e+02 4.826568603515625000e+00 0.000000000000000000e+00 6.470588445663452148e-01 3.352270507812500000e+03 1.000000000000000000e+00 7.301537475585937500e+02
3.900000000000000000e+01 3.586846153846154266e+02 1.822059783935546875e+02 -6.104644775390625000e+00 1.321617960929870605e-01 5.294117927551269531e-01 1.191150390625000000e+03 3.000000000000000000e+00 2.081596679687500000e+02
5.000000000000000000e+00 4.779615384615386233e+02 2.161663208007812500e+02 -3.597930908203125000e+00 1.654136180877685547e-01 0.000000000000000000e+00 1.330572875976562500e+03 1.000000000000000000e+00 1.543259429931640625e+01
4.100000000000000000e+01 4.334846153846153811e+02 1.946384429931640625e+02 1.478881835937500000e-01 0.000000000000000000e+00 6.470588445663452148e-01 2.384753662109375000e+03 3.000000000000000000e+00 6.728245849609375000e+02
4.000000000000000000e+01 1.772769230769231115e+02 8.746505737304687500e+01 -7.514617919921875000e+00 8.565400838851928711e-01 8.235294222831726074e-01 8.169841918945312500e+02 3.000000000000000000e+00 1.599050170898437500e+03
0.000000000000000000e+00 1.197230769230768885e+02 1.851961822509765625e+02 -1.412875366210937500e+01 9.993442296981811523e-01 0.000000000000000000e+00 6.981334228515625000e+02 1.000000000000000000e+00 1.430417175292968750e+02
6.200000000000000000e+01 4.183846153846157563e+02 2.300007476806640625e+02 -2.336547851562500000e+00 9.999999776482582092e-03 0.000000000000000000e+00 1.864602294921875000e+03 4.000000000000000000e+00 4.129908752441406250e+02
2.200000000000000000e+01 3.002538461538461547e+02 2.261162872314453125e+02 -7.304595947265625000e+00 7.614635825157165527e-01 5.294117927551269531e-01 1.313388305664062500e+03 3.000000000000000000e+00 3.071513061523437500e+02
8.000000000000000000e+00 2.762923076923076451e+02 1.816714019775390625e+02 -7.519531250000000000e+00 7.929497957229614258e-01 5.882352963089942932e-02 1.370627319335937500e+03 1.000000000000000000e+00 3.052750549316406250e+02
0.000000000000000000e+00 2.956846153846154266e+02 1.721781311035156250e+02 -1.442358398437500000e+01 9.995045065879821777e-01 0.000000000000000000e+00 3.390964050292968750e+02 1.000000000000000000e+00 4.633370971679687500e+02
1.000000000000000000e+01 5.502538461538459842e+02 2.774949035644531250e+02 -8.375488281250000000e+00 8.606322407722473145e-01 0.000000000000000000e+00 7.562457275390625000e+02 2.000000000000000000e+00 1.874528961181640625e+02
0.000000000000000000e+00 2.400230769230768999e+02 1.598246765136718750e+02 -1.179583740234375000e+01 9.946666359901428223e-01 0.000000000000000000e+00 8.786724853515625000e+02 1.000000000000000000e+00 2.086482849121093750e+02
9.000000000000000000e+00 3.821384615384616268e+02 2.012837371826171875e+02 3.640014648437500000e+00 0.000000000000000000e+00 0.000000000000000000e+00 2.965584472656250000e+03 1.000000000000000000e+00 1.402520385742187500e+03
1.800000000000000000e+01 2.279000000000000625e+02 1.120902023315429688e+02 -1.211047363281250000e+01 9.950727224349975586e-01 0.000000000000000000e+00 8.816083374023437500e+02 2.000000000000000000e+00 4.624472045898437500e+02
4.900000000000000000e+01 8.670000000000001137e+02 4.849335632324218750e+02 -1.352600097656250000e+00 9.999999776482582092e-03 0.000000000000000000e+00 2.082540283203125000e+03 4.000000000000000000e+00 3.981425476074218750e+02
1.800000000000000000e+01 3.228769230769230489e+02 1.802837829589843750e+02 -7.571044921875000000e+00 1.878361850976943970e-01 8.235294222831726074e-01 8.086562500000000000e+02 2.000000000000000000e+00 6.127371215820312500e+02
1.100000000000000000e+01 3.287153846153845507e+02 2.313594970703125000e+02 -1.018377685546875000e+01 9.606368541717529297e-01 0.000000000000000000e+00 1.087411376953125000e+03 2.000000000000000000e+00 2.958907165527343750e+02
0.000000000000000000e+00 1.200692307692307708e+02 1.693571319580078125e+02 -1.590457153320312500e+01 9.999787211418151855e-01 0.000000000000000000e+00 3.510834350585937500e+02 1.000000000000000000e+00 5.316584396362304688e+01
1.000000000000000000e+00 1.641892307692307895e+03 4.213594360351562500e+02 2.162780761718750000e+00 0.000000000000000000e+00 0.000000000000000000e+00 1.659799804687500000e+03 1.000000000000000000e+00 1.497305419921875000e+03
3.700000000000000000e+01 1.373669230769230808e+03 5.786579589843750000e+02 4.078796386718750000e+00 0.000000000000000000e+00 0.000000000000000000e+00 2.488346679687500000e+03 3.000000000000000000e+00 3.786283569335937500e+02
0.000000000000000000e+00 4.257923076923076451e+02 1.951541900634765625e+02 -1.324697875976562500e+01 9.988813996315002441e-01 0.000000000000000000e+00 2.745409851074218750e+02 1.000000000000000000e+00 4.728140563964843750e+02
3.400000000000000000e+01 5.788999999999999773e+02 2.000064392089843750e+02 -4.820861816406250000e+00 4.290911853313446045e-01 5.294117927551269531e-01 1.544015258789062500e+03 3.000000000000000000e+00 8.095977020263671875e+01
9.000000000000000000e+00 8.938769230769224805e+02 5.563351440429687500e+02 -4.434204101562500000e-02 9.999999776482582092e-03 0.000000000000000000e+00 1.385962646484375000e+03 1.000000000000000000e+00 5.533591308593750000e+02
2.900000000000000000e+01 3.453230769230768260e+02 1.870330963134765625e+02 -4.783721923828125000e+00 4.033404290676116943e-01 0.000000000000000000e+00 1.686971801757812500e+03 3.000000000000000000e+00 3.721750183105468750e+02
4.000000000000000000e+01 6.252769230769229125e+02 3.616957092285156250e+02 -2.169708251953125000e+00 0.000000000000000000e+00 2.941176593303680420e-01 1.340247924804687500e+03 3.000000000000000000e+00 9.062500610351562500e+02
1.100000000000000000e+01 2.792384615384615358e+02 1.749064025878906250e+02 -7.407348632812500000e+00 6.762144565582275391e-01 0.000000000000000000e+00 1.217849609375000000e+03 2.000000000000000000e+00 2.464289703369140625e+02
0.000000000000000000e+00 4.467615384615385210e+02 2.063313446044921875e+02 -1.016064453125000000e+01 9.950581192970275879e-01 0.000000000000000000e+00 4.742696838378906250e+02 1.000000000000000000e+00 4.613618469238281250e+02
3.000000000000000000e+01 4.782615384615385778e+02 2.245132293701171875e+02 -1.303375244140625000e+00 0.000000000000000000e+00 0.000000000000000000e+00 2.331848632812500000e+03 3.000000000000000000e+00 3.051187744140625000e+02
0.000000000000000000e+00 2.130307692307692378e+02 2.339181823730468750e+02 -1.016619873046875000e+01 9.943088293075561523e-01 0.000000000000000000e+00 9.987631225585937500e+02 1.000000000000000000e+00 9.644068603515625000e+02
2.500000000000000000e+01 4.644307692307692719e+02 2.501055755615234375e+02 -1.798126220703125000e+00 0.000000000000000000e+00 0.000000000000000000e+00 1.312453613281250000e+03 3.000000000000000000e+00 1.213621582031250000e+03
4.100000000000000000e+01 1.982238461538461934e+03 5.950974731445312500e+02 4.736755371093750000e+00 0.000000000000000000e+00 0.000000000000000000e+00 2.331809570312500000e+03 3.000000000000000000e+00 7.178988037109375000e+02
0.000000000000000000e+00 2.291384615384615415e+02 1.958671264648437500e+02 -1.072885131835937500e+01 9.886921048164367676e-01 0.000000000000000000e+00 9.728546752929687500e+02 1.000000000000000000e+00 4.708465576171875000e+02
7.000000000000000000e+01 4.272000000000000455e+02 1.895874328613281250e+02 -5.010986328125000000e+00 4.989093542098999023e-01 0.000000000000000000e+00 1.482003173828125000e+03 4.000000000000000000e+00 4.720114440917968750e+02
1.800000000000000000e+01 4.306076923076921616e+02 2.120913543701171875e+02 -4.744049072265625000e+00 3.557707667350769043e-01 0.000000000000000000e+00 1.432991821289062500e+03 2.000000000000000000e+00 2.356376495361328125e+02
1.000000000000000000e+00 3.547923076923076451e+02 1.646867370605468750e+02 2.786132812500000000e+00 0.000000000000000000e+00 4.705882370471954346e-01 2.882978515625000000e+03 1.000000000000000000e+00 1.067005859375000000e+03
6.200000000000000000e+01 1.001353846153846348e+03 4.618544921875000000e+02 2.403564453125000000e+00 0.000000000000000000e+00 0.000000000000000000e+00 2.590334960937500000e+03 4.000000000000000000e+00 2.550958709716796875e+02
5.000000000000000000e+00 5.518923076923078952e+02 3.220893859863281250e+02 -2.978759765625000000e+00 9.999999776482582092e-03 0.000000000000000000e+00 1.264642944335937500e+03 1.000000000000000000e+00 2.253111114501953125e+02
0.000000000000000000e+00 2.603538461538461206e+02 1.919334259033203125e+02 -1.355163574218750000e+01 9.995144605636596680e-01 0.000000000000000000e+00 7.028669433593750000e+02 1.000000000000000000e+00 1.507880249023437500e+02
5.000000000000000000e+00 2.355384615384614619e+02 1.674580230712890625e+02 -1.076434326171875000e+01 9.768876433372497559e-01 0.000000000000000000e+00 9.771775512695312500e+02 1.000000000000000000e+00 3.149449462890625000e+02
1.200000000000000000e+01 4.914076923076924004e+02 2.282527465820312500e+02 -8.934967041015625000e+00 6.290996670722961426e-01 0.000000000000000000e+00 8.266658935546875000e+02 2.000000000000000000e+00 1.454260864257812500e+03
4.900000000000000000e+01 7.869846153846154948e+02 4.076825256347656250e+02 4.352508544921875000e+00 0.000000000000000000e+00 0.000000000000000000e+00 3.126727050781250000e+03 4.000000000000000000e+00 3.954749450683593750e+02
5.300000000000000000e+01 5.018692307692308532e+02 2.542164306640625000e+02 -3.219329833984375000e+00 1.166272312402725220e-01 5.882352963089942932e-02 2.031773559570312500e+03 4.000000000000000000e+00 3.042572326660156250e+02
5.700000000000000000e+01 3.077461538461539021e+02 4.041720581054687500e+02 3.769836425781250000e-01 0.000000000000000000e+00 8.823529481887817383e-01 2.305343017578125000e+03 4.000000000000000000e+00 1.879067504882812500e+03
2.900000000000000000e+01 5.295692307692306713e+02 2.009236755371093750e+02 -5.125030517578125000e+00 1.017280817031860352e-01 0.000000000000000000e+00 1.148675415039062500e+03 3.000000000000000000e+00 2.413249053955078125e+02
0.000000000000000000e+00 5.121692307692308077e+02 4.566211853027343750e+02 -4.337188720703125000e+00 5.525445938110351562e-01 0.000000000000000000e+00 9.755115966796875000e+02 1.000000000000000000e+00 9.148137817382812500e+02
6.500000000000000000e+01 1.103546153846154311e+03 5.313067016601562500e+02 1.561187744140625000e+00 0.000000000000000000e+00 0.000000000000000000e+00 2.403775634765625000e+03 4.000000000000000000e+00 1.141391220092773438e+02
3.400000000000000000e+01 7.253153846153844597e+02 3.843352966308593750e+02 -4.610809326171875000e+00 3.194294273853302002e-01 0.000000000000000000e+00 1.527248168945312500e+03 3.000000000000000000e+00 1.874211120605468750e+02
6.700000000000000000e+01 1.155615384615384983e+03 5.425155029296875000e+02 -2.474090576171875000e+00 9.999999776482582092e-03 5.882352963089942932e-02 1.726426269531250000e+03 4.000000000000000000e+00 4.692334594726562500e+02
6.900000000000000000e+01 4.809923076923080316e+02 1.952597198486328125e+02 -4.485137939453125000e+00 9.999999776482582092e-03 1.176470592617988586e-01 1.417282470703125000e+03 4.000000000000000000e+00 6.688032226562500000e+02
0.000000000000000000e+00 1.428461538461538112e+02 1.127801666259765625e+02 -1.176519775390625000e+01 9.838954210281372070e-01 0.000000000000000000e+00 6.864964599609375000e+02 1.000000000000000000e+00 8.681154632568359375e+01
6.000000000000000000e+00 2.810461538461537998e+02 1.616019897460937500e+02 -5.356811523437500000e+00 4.221484065055847168e-01 0.000000000000000000e+00 1.750404541015625000e+03 1.000000000000000000e+00 1.940000000000000000e+02
4.100000000000000000e+01 3.440461538461538566e+02 1.812930450439453125e+02 -3.964996337890625000e+00 2.012936472892761230e-01 1.235294103622436523e+00 1.937558227539062500e+03 3.000000000000000000e+00 3.154795227050781250e+02
6.000000000000000000e+00 2.700538461538461092e+02 1.815802154541015625e+02 -1.439495849609375000e+01 9.998463392257690430e-01 0.000000000000000000e+00 7.091677856445312500e+02 1.000000000000000000e+00 2.648870849609375000e+02
0.000000000000000000e+00 5.121692307692308077e+02 4.566211853027343750e+02 -4.337188720703125000e+00 5.525445938110351562e-01 0.000000000000000000e+00 9.755115966796875000e+02 1.000000000000000000e+00 9.148137817382812500e+02
0.000000000000000000e+00 1.862384615384615358e+02 2.009758758544921875e+02 -1.619818115234375000e+01 9.999815225601196289e-01 0.000000000000000000e+00 4.026632690429687500e+02 1.000000000000000000e+00 8.442986297607421875e+01
1.200000000000000000e+01 3.996538461538460751e+02 2.295733489990234375e+02 -5.353607177734375000e+00 3.028863072395324707e-01 5.882353186607360840e-01 1.400167846679687500e+03 2.000000000000000000e+00 1.186195755004882812e+02
1.800000000000000000e+01 2.279000000000000625e+02 1.120902023315429688e+02 -1.211047363281250000e+01 9.950727224349975586e-01 0.000000000000000000e+00 8.816083374023437500e+02 2.000000000000000000e+00 4.624472045898437500e+02
1.000000000000000000e+00 4.398461538461539249e+02 2.200655975341796875e+02 -6.894012451171875000e+00 5.093196630477905273e-01 0.000000000000000000e+00 6.994810791015625000e+02 1.000000000000000000e+00 1.635110595703125000e+03
4.200000000000000000e+01 1.765615384615384471e+02 7.717173004150390625e+01 -7.314636230468750000e+00 4.761716425418853760e-01 0.000000000000000000e+00 8.411179199218750000e+02 3.000000000000000000e+00 1.058579711914062500e+03
4.700000000000000000e+01 6.616615384615384983e+02 1.985491180419921875e+02 -4.051544189453125000e+00 2.194759547710418701e-01 0.000000000000000000e+00 1.818286621093750000e+03 4.000000000000000000e+00 2.083670043945312500e+02
2.000000000000000000e+01 2.332153846153845222e+02 1.928946685791015625e+01 -7.419372558593750000e+00 3.939853906631469727e-01 5.882353186607360840e-01 9.354954833984375000e+02 3.000000000000000000e+00 6.841782226562500000e+02
1.400000000000000000e+01 3.439153846153846530e+02 2.457478637695312500e+02 -9.146820068359375000e+00 8.942759037017822266e-01 5.882352963089942932e-02 1.164677490234375000e+03 2.000000000000000000e+00 3.111643371582031250e+02
2.800000000000000000e+01 4.330538461538459387e+02 2.353929443359375000e+02 -1.499145507812500000e+00 1.401926279067993164e-01 6.470588445663452148e-01 1.956468505859375000e+03 3.000000000000000000e+00 9.127709350585937500e+02
0.000000000000000000e+00 1.667692307692308020e+02 1.620787506103515625e+02 -1.138061523437500000e+01 9.927971959114074707e-01 0.000000000000000000e+00 8.551661376953125000e+02 1.000000000000000000e+00 5.634966430664062500e+02
5.400000000000000000e+01 9.149384615384623203e+02 4.709154052734375000e+02 -2.923614501953125000e+00 9.999999776482582092e-03 0.000000000000000000e+00 1.794499877929687500e+03 4.000000000000000000e+00 4.498727722167968750e+02
6.000000000000000000e+00 2.770153846153846189e+02 1.740013732910156250e+02 -1.118344116210937500e+01 9.897313117980957031e-01 0.000000000000000000e+00 4.444594726562500000e+02 1.000000000000000000e+00 1.742399215698242188e+01
0.000000000000000000e+00 2.142523076923077042e+03 6.170579833984375000e+02 1.131347656250000000e+00 0.000000000000000000e+00 0.000000000000000000e+00 1.363314208984375000e+03 1.000000000000000000e+00 1.589154907226562500e+03
1.000000000000000000e+00 4.843846153846150173e+02 2.346166687011718750e+02 -1.113116455078125000e+01 9.913160800933837891e-01 0.000000000000000000e+00 6.080396118164062500e+02 1.000000000000000000e+00 3.272679443359375000e+02
2.500000000000000000e+01 4.191153846153846416e+02 3.394075317382812500e+02 -6.858459472656250000e+00 6.523582339286804199e-01 0.000000000000000000e+00 1.440847167968750000e+03 3.000000000000000000e+00 3.710851440429687500e+02
2.500000000000000000e+01 7.872153846153843233e+02 4.131106262207031250e+02 -6.162628173828125000e+00 6.393196582794189453e-01 2.352941185235977173e-01 1.207819458007812500e+03 3.000000000000000000e+00 4.519222106933593750e+02
4.400000000000000000e+01 3.482153846153844938e+02 1.810590057373046875e+02 -4.507629394531250000e+00 2.709111869335174561e-01 2.941176593303680420e-01 1.797405395507812500e+03 3.000000000000000000e+00 2.480687103271484375e+02
2.000000000000000000e+00 3.164384615384615813e+02 1.965254364013671875e+02 -1.086285400390625000e+01 9.983968734741210938e-01 0.000000000000000000e+00 5.415338134765625000e+02 1.000000000000000000e+00 1.110782470703125000e+02
2.100000000000000000e+01 7.738384615384615017e+02 4.402812194824218750e+02 -6.746307373046875000e+00 6.849215030670166016e-01 0.000000000000000000e+00 1.094625366210937500e+03 3.000000000000000000e+00 4.476566467285156250e+02
1.900000000000000000e+01 5.073076923076924345e+02 2.627409973144531250e+02 -6.043243408203125000e+00 2.049535065889358521e-01 0.000000000000000000e+00 1.036640136718750000e+03 2.000000000000000000e+00 5.022756042480468750e+02
7.000000000000000000e+00 6.450000000000000000e+02 2.205868072509765625e+02 -4.360290527343750000e+00 2.404844611883163452e-01 0.000000000000000000e+00 1.742286987304687500e+03 1.000000000000000000e+00 1.504816436767578125e+02
6.600000000000000000e+01 1.358453846153846371e+03 5.435772705078125000e+02 2.265899658203125000e+00 0.000000000000000000e+00 0.000000000000000000e+00 2.464870605468750000e+03 4.000000000000000000e+00 7.850031127929687500e+02
1.800000000000000000e+01 6.187692307692303757e+02 3.587217407226562500e+02 -7.074340820312500000e+00 7.823342084884643555e-01 0.000000000000000000e+00 1.091787963867187500e+03 2.000000000000000000e+00 1.550246734619140625e+02
6.400000000000000000e+01 1.107130769230769147e+03 5.351132202148437500e+02 -1.386871337890625000e+00 0.000000000000000000e+00 0.000000000000000000e+00 1.937927856445312500e+03 4.000000000000000000e+00 2.128319549560546875e+02
0.000000000000000000e+00 3.509615384615386233e+02 1.986330566406250000e+02 -9.572998046875000000e+00 9.893574118614196777e-01 0.000000000000000000e+00 5.887108764648437500e+02 1.000000000000000000e+00 6.655302047729492188e+00
3.000000000000000000e+01 6.309769230769229580e+02 3.418236083984375000e+02 2.522827148437500000e+00 0.000000000000000000e+00 1.411764740943908691e+00 2.615168945312500000e+03 3.000000000000000000e+00 8.662194213867187500e+02
1.000000000000000000e+00 3.451153846153846416e+02 1.582876434326171875e+02 6.023864746093750000e-01 0.000000000000000000e+00 0.000000000000000000e+00 2.216323242187500000e+03 1.000000000000000000e+00 8.386262817382812500e+02
5.800000000000000000e+01 9.650461538461538566e+02 4.216457824707031250e+02 2.000213623046875000e+00 0.000000000000000000e+00 0.000000000000000000e+00 2.586224609375000000e+03 4.000000000000000000e+00 2.927533874511718750e+02
1.200000000000000000e+01 1.085969230769231444e+03 4.726251831054687500e+02 -1.491485595703125000e+00 9.999999776482582092e-03 5.882353186607360840e-01 1.587677124023437500e+03 2.000000000000000000e+00 3.662077026367187500e+02
3.300000000000000000e+01 1.502615384615384357e+02 1.055978393554687500e+02 -6.986907958984375000e+00 5.686280131340026855e-01 6.470588445663452148e-01 1.079541015625000000e+03 3.000000000000000000e+00 5.982126464843750000e+02
2.200000000000000000e+01 1.278523076923077497e+03 5.729507446289062500e+02 3.764129638671875000e+00 0.000000000000000000e+00 0.000000000000000000e+00 2.227177001953125000e+03 3.000000000000000000e+00 3.640198669433593750e+02
9.000000000000000000e+00 2.583384615384615017e+02 2.412578125000000000e+02 -1.042587280273437500e+01 9.738395810127258301e-01 0.000000000000000000e+00 1.068632446289062500e+03 1.000000000000000000e+00 8.450460205078125000e+02
0.000000000000000000e+00 5.726923076923073097e+01 6.459460449218750000e+01 -1.388818359375000000e+01 9.914324879646301270e-01 0.000000000000000000e+00 7.486871337890625000e+02 1.000000000000000000e+00 2.773605957031250000e+02
6.000000000000000000e+01 5.401923076923076223e+02 2.730484313964843750e+02 -3.001159667968750000e+00 9.999999776482582092e-03 0.000000000000000000e+00 1.479952392578125000e+03 4.000000000000000000e+00 9.767594604492187500e+02
4.000000000000000000e+00 3.452461538461540158e+02 1.433769531250000000e+02 4.359161376953125000e+00 0.000000000000000000e+00 0.000000000000000000e+00 3.309645019531250000e+03 1.000000000000000000e+00 6.999954223632812500e+02
0.000000000000000000e+00 2.558538461538461775e+02 1.553900756835937500e+02 -1.433230590820312500e+01 9.991678595542907715e-01 0.000000000000000000e+00 3.130316467285156250e+02 1.000000000000000000e+00 3.095804138183593750e+02
2.700000000000000000e+01 6.436153846153845279e+02 3.604815063476562500e+02 -6.837707519531250000e+00 7.491223812103271484e-01 0.000000000000000000e+00 1.082021240234375000e+03 3.000000000000000000e+00 2.047686462402343750e+02
0.000000000000000000e+00 2.207615384615384357e+02 2.063102874755859375e+02 -1.587069702148437500e+01 9.999861717224121094e-01 0.000000000000000000e+00 4.649862976074218750e+02 1.000000000000000000e+00 3.427216186523437500e+02
5.500000000000000000e+01 4.912461538461539021e+02 1.780037536621093750e+02 -3.268432617187500000e-01 0.000000000000000000e+00 0.000000000000000000e+00 1.976160156250000000e+03 4.000000000000000000e+00 6.284493408203125000e+02
5.000000000000000000e+01 5.057615384615384073e+02 2.481333160400390625e+02 -3.191528320312500000e+00 0.000000000000000000e+00 0.000000000000000000e+00 1.503916381835937500e+03 4.000000000000000000e+00 7.676683959960937500e+02
0.000000000000000000e+00 3.966692307692306940e+02 2.454912567138671875e+02 -7.588195800781250000e+00 9.549283981323242188e-01 0.000000000000000000e+00 1.133161132812500000e+03 1.000000000000000000e+00 1.452139404296875000e+03
1.700000000000000000e+01 8.116153846153848690e+02 4.760712585449218750e+02 -3.824829101562500000e+00 1.709001511335372925e-01 6.470588445663452148e-01 1.707848266601562500e+03 2.000000000000000000e+00 3.040672302246093750e+02
3.000000000000000000e+00 7.928230769230774513e+02 2.786210021972656250e+02 2.230590820312500000e+00 0.000000000000000000e+00 0.000000000000000000e+00 1.661344726562500000e+03 1.000000000000000000e+00 3.356635808944702148e+00
1.600000000000000000e+01 1.017800000000000296e+03 5.274581298828125000e+02 6.867980957031250000e-01 0.000000000000000000e+00 0.000000000000000000e+00 1.926683837890625000e+03 2.000000000000000000e+00 4.814071655273437500e+01
6.400000000000000000e+01 7.759923076923075769e+02 4.039267578125000000e+02 1.445617675781250000e-01 0.000000000000000000e+00 0.000000000000000000e+00 2.363205566406250000e+03 4.000000000000000000e+00 3.684986877441406250e+02
6.000000000000000000e+00 3.708999999999999204e+02 1.572142639160156250e+02 3.239257812500000000e+00 0.000000000000000000e+00 0.000000000000000000e+00 3.150649414062500000e+03 1.000000000000000000e+00 6.042296752929687500e+02
9.000000000000000000e+00 3.059692307692307054e+02 1.818296508789062500e+02 -7.625000000000000000e+00 5.557293295860290527e-01 6.470588445663452148e-01 1.225132934570312500e+03 1.000000000000000000e+00 1.747347412109375000e+02
6.500000000000000000e+01 9.450615384615383618e+02 4.169147338867187500e+02 2.607421875000000000e+00 0.000000000000000000e+00 0.000000000000000000e+00 2.664086914062500000e+03 4.000000000000000000e+00 4.629186096191406250e+02
0.000000000000000000e+00 1.273692307692307111e+02 8.077876281738281250e+01 -1.358883666992187500e+01 9.699810743331909180e-01 0.000000000000000000e+00 7.695513305664062500e+02 1.000000000000000000e+00 9.842436218261718750e+01
0.000000000000000000e+00 1.758769230769231058e+02 1.693692321777343750e+02 -1.012127685546875000e+01 9.744789600372314453e-01 0.000000000000000000e+00 6.035320434570312500e+02 1.000000000000000000e+00 2.764439086914062500e+02
2.000000000000000000e+00 2.201538461538461320e+02 1.998993377685546875e+02 -1.547106933593750000e+01 9.999501109123229980e-01 0.000000000000000000e+00 4.702555847167968750e+02 1.000000000000000000e+00 2.131062469482421875e+02
0.000000000000000000e+00 1.840846153846153470e+02 1.782850189208984375e+02 -1.207388305664062500e+01 9.958801865577697754e-01 0.000000000000000000e+00 6.561557617187500000e+02 1.000000000000000000e+00 2.420585632324218750e+02
7.100000000000000000e+01 1.105092307692307713e+03 5.009942626953125000e+02 4.610900878906250000e-01 0.000000000000000000e+00 0.000000000000000000e+00 2.385421875000000000e+03 4.000000000000000000e+00 2.138042907714843750e+02
3.000000000000000000e+00 6.364846153846154948e+02 3.459406738281250000e+02 -7.897857666015625000e+00 8.553360104560852051e-01 0.000000000000000000e+00 1.089692016601562500e+03 1.000000000000000000e+00 2.340933227539062500e+02
0.000000000000000000e+00 2.847692307692307168e+02 1.572287445068359375e+02 -1.504919433593750000e+01 9.997754693031311035e-01 0.000000000000000000e+00 2.785254211425781250e+02 1.000000000000000000e+00 5.132259521484375000e+02
6.100000000000000000e+01 7.186230769230767237e+02 3.974042968750000000e+02 4.874786376953125000e+00 0.000000000000000000e+00 0.000000000000000000e+00 3.011453613281250000e+03 4.000000000000000000e+00 4.835430297851562500e+02
3.400000000000000000e+01 3.722461538461539021e+02 2.492139587402343750e+02 -8.435180664062500000e+00 8.524813652038574219e-01 0.000000000000000000e+00 1.242861206054687500e+03 3.000000000000000000e+00 3.128058471679687500e+02
1.100000000000000000e+01 2.922769230769230262e+02 1.697735748291015625e+02 -9.479522705078125000e+00 9.088748097419738770e-01 0.000000000000000000e+00 1.076362426757812500e+03 2.000000000000000000e+00 7.294199829101562500e+02
3.500000000000000000e+01 5.307692307692308304e+02 2.594459533691406250e+02 -5.435333251953125000e+00 4.888038337230682373e-01 0.000000000000000000e+00 1.023866394042968750e+03 3.000000000000000000e+00 1.838813842773437500e+03
3.000000000000000000e+00 1.777615384615384357e+02 3.058406066894531250e+01 -7.439331054687500000e+00 9.603736400604248047e-01 0.000000000000000000e+00 9.973152465820312500e+02 1.000000000000000000e+00 1.377778564453125000e+03
1.200000000000000000e+01 3.637538461538461547e+02 1.708768310546875000e+02 -5.806915283203125000e+00 2.978534400463104248e-01 0.000000000000000000e+00 1.335736938476562500e+03 2.000000000000000000e+00 6.637056732177734375e+01
6.700000000000000000e+01 3.219923076923075200e+02 1.923164367675781250e+02 -5.584838867187500000e+00 4.764562547206878662e-01 0.000000000000000000e+00 8.552332153320312500e+02 4.000000000000000000e+00 1.121114624023437500e+03
4.500000000000000000e+01 5.203461538461538112e+02 3.438583679199218750e+02 -4.884246826171875000e+00 2.888066470623016357e-01 5.294117927551269531e-01 1.727389282226562500e+03 4.000000000000000000e+00 3.677455444335937500e+02
3.900000000000000000e+01 5.589692307692307622e+02 2.859424133300781250e+02 -5.801818847656250000e+00 4.219394326210021973e-01 5.882353186607360840e-01 1.716587768554687500e+03 3.000000000000000000e+00 2.162818908691406250e+02
4.700000000000000000e+01 6.616615384615384983e+02 1.985491180419921875e+02 -4.051544189453125000e+00 2.194759547710418701e-01 0.000000000000000000e+00 1.818286621093750000e+03 4.000000000000000000e+00 2.083670043945312500e+02
4.500000000000000000e+01 5.578615384615380890e+02 2.548353424072265625e+02 -8.203125000000000000e-01 9.999999776482582092e-03 0.000000000000000000e+00 1.596347656250000000e+03 4.000000000000000000e+00 1.192013305664062500e+03
5.800000000000000000e+01 7.347769230769227988e+02 4.130571289062500000e+02 3.930297851562500000e+00 0.000000000000000000e+00 0.000000000000000000e+00 3.139449218750000000e+03 4.000000000000000000e+00 2.640792541503906250e+02
3.000000000000000000e+00 1.059692307692307622e+02 1.470869140625000000e+02 -1.196838378906250000e+01 9.862978458404541016e-01 0.000000000000000000e+00 1.037604980468750000e+03 1.000000000000000000e+00 9.034697265625000000e+02
4.800000000000000000e+01 6.881307692307690331e+02 2.302144622802734375e+02 -3.798156738281250000e+00 2.142007946968078613e-01 2.941176593303680420e-01 1.888724243164062500e+03 4.000000000000000000e+00 2.308982391357421875e+02
2.500000000000000000e+01 2.584923076923076906e+02 1.764501495361328125e+02 -9.360107421875000000e+00 6.138831377029418945e-01 0.000000000000000000e+00 7.860943603515625000e+02 3.000000000000000000e+00 1.006435424804687500e+03
0.000000000000000000e+00 3.007769230769230830e+02 2.319210662841796875e+02 -1.075854492187500000e+01 9.899730086326599121e-01 0.000000000000000000e+00 4.121617431640625000e+02 1.000000000000000000e+00 3.621587753295898438e+00
1.800000000000000000e+01 9.489230769230766782e+02 5.791129760742187500e+02 -2.858978271484375000e+00 1.123006120324134827e-01 2.941176593303680420e-01 9.134097290039062500e+02 2.000000000000000000e+00 1.663383056640625000e+03
5.000000000000000000e+00 2.882076923076924118e+02 2.128558654785156250e+02 -1.388601684570312500e+01 9.998875260353088379e-01 0.000000000000000000e+00 3.316781921386718750e+02 1.000000000000000000e+00 1.600247497558593750e+02
5.400000000000000000e+01 1.011946153846153607e+03 5.690430297851562500e+02 2.664093017578125000e+00 0.000000000000000000e+00 0.000000000000000000e+00 1.966878295898437500e+03 4.000000000000000000e+00 4.239625854492187500e+02
1.000000000000000000e+01 5.931923076923075087e+02 1.902228546142578125e+02 -4.652770996093750000e+00 3.697139024734497070e-01 2.941176593303680420e-01 1.669377685546875000e+03 2.000000000000000000e+00 1.158271713256835938e+02
1.100000000000000000e+01 2.318538461538461775e+02 2.088892517089843750e+02 -8.618743896484375000e+00 9.264361262321472168e-01 5.294117927551269531e-01 1.187937500000000000e+03 2.000000000000000000e+00 2.971285095214843750e+02
5.800000000000000000e+01 4.241999999999997613e+02 1.990981140136718750e+02 -7.203369140625000000e-01 9.999999776482582092e-03 2.352941185235977173e-01 2.039246459960937500e+03 4.000000000000000000e+00 7.250090332031250000e+02
4.800000000000000000e+01 8.109846153846156085e+02 4.451577148437500000e+02 -1.362884521484375000e+00 9.999999776482582092e-03 0.000000000000000000e+00 2.215592041015625000e+03 4.000000000000000000e+00 3.042842407226562500e+02
0.000000000000000000e+00 1.748230769230769397e+02 1.689223632812500000e+02 -1.116598510742187500e+01 9.900156855583190918e-01 5.882352963089942932e-02 9.142905273437500000e+02 1.000000000000000000e+00 5.682143554687500000e+02
6.000000000000000000e+00 7.733230769230768828e+02 2.160654602050781250e+02 -6.655364990234375000e+00 8.594260215759277344e-01 0.000000000000000000e+00 8.342048339843750000e+02 1.000000000000000000e+00 6.798215332031250000e+02
1.200000000000000000e+01 2.616538461538462457e+02 2.094248046875000000e+02 -1.405490112304687500e+01 9.998983740806579590e-01 0.000000000000000000e+00 4.275407714843750000e+02 2.000000000000000000e+00 2.387803497314453125e+02
1.300000000000000000e+01 6.157615384615384073e+02 1.864162139892578125e+02 -4.468780517578125000e+00 3.261632919311523438e-01 0.000000000000000000e+00 1.717286865234375000e+03 2.000000000000000000e+00 1.324907531738281250e+02
1.700000000000000000e+01 6.656153846153843006e+02 2.798366699218750000e+02 -3.575958251953125000e+00 1.201978400349617004e-01 0.000000000000000000e+00 1.906040405273437500e+03 2.000000000000000000e+00 1.837758636474609375e+02
6.600000000000000000e+01 8.785153846153850736e+02 4.012279968261718750e+02 2.354553222656250000e+00 0.000000000000000000e+00 5.294117927551269531e-01 2.787261718750000000e+03 4.000000000000000000e+00 4.447933654785156250e+02
5.500000000000000000e+01 8.265538461538460524e+02 4.966147766113281250e+02 -3.440185546875000000e+00 1.238401085138320923e-01 7.058823704719543457e-01 1.768255493164062500e+03 4.000000000000000000e+00 3.234350585937500000e+02
4.300000000000000000e+01 3.722461538461537884e+02 1.752331695556640625e+02 -3.506195068359375000e+00 2.560800909996032715e-01 0.000000000000000000e+00 1.841236206054687500e+03 3.000000000000000000e+00 4.966006774902343750e+02
2.500000000000000000e+01 3.183076923076924345e+02 1.454043884277343750e+02 -5.981475830078125000e+00 7.272793650627136230e-01 0.000000000000000000e+00 1.320905151367187500e+03 3.000000000000000000e+00 5.234124755859375000e+02
5.300000000000000000e+01 8.490230769230770420e+02 5.791218261718750000e+02 4.923706054687500000e-01 0.000000000000000000e+00 5.294117927551269531e-01 1.822694580078125000e+03 4.000000000000000000e+00 1.258062011718750000e+03
2.900000000000000000e+01 3.453230769230768260e+02 1.870330963134765625e+02 -4.783721923828125000e+00 4.033404290676116943e-01 0.000000000000000000e+00 1.686971801757812500e+03 3.000000000000000000e+00 3.721750183105468750e+02
2.500000000000000000e+01 4.982923076923074746e+02 1.682279052734375000e+02 -1.195129394531250000e+00 0.000000000000000000e+00 0.000000000000000000e+00 2.348700195312500000e+03 3.000000000000000000e+00 2.912403259277343750e+02
3.700000000000000000e+01 6.401461538461537657e+02 1.835508728027343750e+02 -4.256683349609375000e+00 2.657667696475982666e-01 2.941176593303680420e-01 1.790975708007812500e+03 3.000000000000000000e+00 1.707697601318359375e+02
3.600000000000000000e+01 7.269230769230766498e+01 1.426721343994140625e+02 -1.180670166015625000e+01 9.348732829093933105e-01 0.000000000000000000e+00 1.064357299804687500e+03 3.000000000000000000e+00 4.509749755859375000e+02
7.000000000000000000e+00 4.263076923076921503e+02 2.590873413085937500e+02 -1.117276000976562500e+01 9.956849813461303711e-01 0.000000000000000000e+00 3.018457946777343750e+02 1.000000000000000000e+00 1.580012207031250000e+02
7.000000000000000000e+00 5.523846153846159268e+02 1.787323913574218750e+02 -3.271484375000000000e-02 0.000000000000000000e+00 0.000000000000000000e+00 2.566132568359375000e+03 1.000000000000000000e+00 4.875391540527343750e+02
3.700000000000000000e+01 6.434230769230773603e+02 1.042174148559570312e+02 -1.138519287109375000e+00 0.000000000000000000e+00 5.882352963089942932e-02 2.386224609375000000e+03 3.000000000000000000e+00 2.693585815429687500e+02
1.100000000000000000e+01 3.080692307692307281e+02 2.359695281982421875e+02 -1.064120483398437500e+01 9.687793254852294922e-01 0.000000000000000000e+00 1.041411499023437500e+03 2.000000000000000000e+00 3.039618530273437500e+02
3.700000000000000000e+01 2.973307692307693628e+02 1.666853027343750000e+02 -4.706878662109375000e+00 3.050702810287475586e-01 0.000000000000000000e+00 1.845587036132812500e+03 3.000000000000000000e+00 1.855442962646484375e+02
6.100000000000000000e+01 4.845230769230767010e+02 1.933146362304687500e+02 -5.299743652343750000e+00 9.999999776482582092e-03 0.000000000000000000e+00 1.235757446289062500e+03 4.000000000000000000e+00 6.037435302734375000e+02
3.000000000000000000e+01 3.420769230769229239e+02 2.043097381591796875e+02 -3.439483642578125000e+00 1.538262218236923218e-01 5.882353186607360840e-01 2.022408813476562500e+03 3.000000000000000000e+00 3.137530517578125000e+02
1.800000000000000000e+01 4.721923076923078497e+02 2.919736022949218750e+02 -4.294525146484375000e+00 2.123487591743469238e-01 8.235294222831726074e-01 1.803685424804687500e+03 2.000000000000000000e+00 5.100896301269531250e+02
4.700000000000000000e+01 1.258607692307692787e+03 4.833648071289062500e+02 2.296966552734375000e+00 0.000000000000000000e+00 0.000000000000000000e+00 2.673691406250000000e+03 4.000000000000000000e+00 1.586210479736328125e+02
8.000000000000000000e+00 4.145307692307691809e+02 2.850620422363281250e+02 1.495391845703125000e+00 0.000000000000000000e+00 8.235294222831726074e-01 2.772695068359375000e+03 1.000000000000000000e+00 1.224311767578125000e+03
6.900000000000000000e+01 5.689615384615383391e+02 1.926063079833984375e+02 -5.153808593750000000e-01 0.000000000000000000e+00 4.117647111415863037e-01 1.747158569335937500e+03 4.000000000000000000e+00 9.369700927734375000e+02
1.700000000000000000e+01 2.717076923076922412e+02 1.879295349121093750e+02 -8.733428955078125000e+00 8.399368524551391602e-01 5.882352963089942932e-02 1.136594848632812500e+03 2.000000000000000000e+00 1.664436492919921875e+02
0.000000000000000000e+00 2.509538461538462002e+02 2.028492279052734375e+02 -1.193515014648437500e+01 9.982976913452148438e-01 0.000000000000000000e+00 2.173678741455078125e+02 1.000000000000000000e+00 1.000000000000000000e+00
5.600000000000000000e+01 9.701846153846151992e+02 3.995542297363281250e+02 -3.683776855468750000e+00 1.903680115938186646e-01 6.470588445663452148e-01 1.597634033203125000e+03 4.000000000000000000e+00 5.521074218750000000e+02
0.000000000000000000e+00 2.669692307692307054e+02 1.069994201660156250e+02 -8.221649169921875000e+00 8.568293452262878418e-01 0.000000000000000000e+00 1.164227050781250000e+03 1.000000000000000000e+00 4.681423950195312500e+02
6.000000000000000000e+00 2.063461538461537828e+02 1.759802703857421875e+02 -1.075265502929687500e+01 9.842879772186279297e-01 0.000000000000000000e+00 9.739577636718750000e+02 1.000000000000000000e+00 6.726065673828125000e+02
5.300000000000000000e+01 8.959307692307691013e+02 4.898930358886718750e+02 -2.844207763671875000e+00 1.030258163809776306e-01 2.941176593303680420e-01 1.819364379882812500e+03 4.000000000000000000e+00 4.420063781738281250e+02
1.200000000000000000e+01 1.142769230769230830e+02 1.396289825439453125e+02 -9.141998291015625000e+00 9.660975337028503418e-01 0.000000000000000000e+00 1.160136718750000000e+03 2.000000000000000000e+00 7.593085327148437500e+02
3.100000000000000000e+01 4.467769230769231967e+02 2.944262390136718750e+02 -7.094818115234375000e+00 7.143106460571289062e-01 5.882352963089942932e-02 1.442464965820312500e+03 3.000000000000000000e+00 3.157325439453125000e+02
4.200000000000000000e+01 1.104107692307692332e+03 4.672578125000000000e+02 -4.586181640625000000e-01 9.999999776482582092e-03 2.941176593303680420e-01 1.639869995117187500e+03 3.000000000000000000e+00 3.716044311523437500e+02
2.700000000000000000e+01 3.109692307692307054e+02 1.727658996582031250e+02 -6.769897460937500000e+00 5.903730392456054688e-01 5.294117927551269531e-01 1.399521118164062500e+03 3.000000000000000000e+00 3.027715759277343750e+02
0.000000000000000000e+00 1.553384615384615586e+02 1.105398254394531250e+02 -1.345959472656250000e+01 9.977207183837890625e-01 0.000000000000000000e+00 7.997471313476562500e+02 1.000000000000000000e+00 3.126646118164062500e+02
0.000000000000000000e+00 1.360846153846153754e+02 1.375236511230468750e+02 -1.120727539062500000e+01 9.950374960899353027e-01 0.000000000000000000e+00 8.275558471679687500e+02 1.000000000000000000e+00 5.922279663085937500e+02
1.000000000000000000e+00 1.895769230769230091e+02 1.339885864257812500e+02 -1.026507568359375000e+01 9.893854260444641113e-01 0.000000000000000000e+00 7.859440917968750000e+02 1.000000000000000000e+00 3.799944763183593750e+02
2.900000000000000000e+01 4.093769230769230489e+02 2.514351654052734375e+02 -6.449829101562500000e+00 6.795511841773986816e-01 6.470588445663452148e-01 1.419990112304687500e+03 3.000000000000000000e+00 4.242952575683593750e+02
6.800000000000000000e+01 8.128384615384615017e+02 4.367919311523437500e+02 1.727874755859375000e+00 0.000000000000000000e+00 0.000000000000000000e+00 2.741767333984375000e+03 4.000000000000000000e+00 4.045057678222656250e+02
0.000000000000000000e+00 1.529153846153845677e+02 8.298155975341796875e+01 -1.339108276367187500e+01 9.763265848159790039e-01 0.000000000000000000e+00 7.806219482421875000e+02 1.000000000000000000e+00 1.404487915039062500e+02
3.700000000000000000e+01 4.841384615384613426e+02 2.054080657958984375e+02 -9.510803222656250000e-01 0.000000000000000000e+00 4.117647111415863037e-01 2.400094970703125000e+03 3.000000000000000000e+00 6.456119384765625000e+02
1.500000000000000000e+01 5.249615384615385665e+02 2.154606170654296875e+02 -9.175689697265625000e+00 9.293516278266906738e-01 0.000000000000000000e+00 8.862275390625000000e+02 2.000000000000000000e+00 2.632613220214843750e+02
1.000000000000000000e+00 2.273615384615383448e+02 2.210426025390625000e+02 -1.140783691406250000e+01 9.951401352882385254e-01 0.000000000000000000e+00 1.006034912109375000e+03 1.000000000000000000e+00 1.121422973632812500e+03
4.200000000000000000e+01 4.524076923076921162e+02 2.656539001464843750e+02 -4.263397216796875000e+00 2.115720361471176147e-01 5.294117927551269531e-01 1.459770751953125000e+03 3.000000000000000000e+00 1.081079635620117188e+02
6.000000000000000000e+00 4.099461538461539476e+02 2.086399230957031250e+02 4.826568603515625000e+00 0.000000000000000000e+00 6.470588445663452148e-01 3.352270507812500000e+03 1.000000000000000000e+00 7.301537475585937500e+02
3.200000000000000000e+01 1.107846153846154920e+02 1.316961517333984375e+02 -1.012124633789062500e+01 9.606999754905700684e-01 0.000000000000000000e+00 1.131428222656250000e+03 3.000000000000000000e+00 6.051064453125000000e+02
3.700000000000000000e+01 1.935538461538460240e+02 1.355994720458984375e+02 -7.482208251953125000e+00 3.088134527206420898e-01 0.000000000000000000e+00 9.302764892578125000e+02 3.000000000000000000e+00 7.804765625000000000e+02
3.200000000000000000e+01 2.697846153846153925e+02 2.938409118652343750e+02 -4.937866210937500000e+00 2.156937420368194580e-01 0.000000000000000000e+00 8.705335693359375000e+02 3.000000000000000000e+00 1.015509155273437500e+03
9.000000000000000000e+00 5.156692307692305803e+02 2.855602722167968750e+02 2.738189697265625000e+00 0.000000000000000000e+00 5.294117927551269531e-01 2.422053955078125000e+03 1.000000000000000000e+00 6.472263183593750000e+02
3.700000000000000000e+01 4.562000000000001023e+02 1.718654022216796875e+02 -1.435607910156250000e+00 9.999999776482582092e-03 5.882352963089942932e-02 2.183478515625000000e+03 3.000000000000000000e+00 5.766615600585937500e+02
1.500000000000000000e+01 3.947692307692308304e+02 2.147996978759765625e+02 -5.481384277343750000e+00 4.414703249931335449e-01 2.941176593303680420e-01 1.337744750976562500e+03 2.000000000000000000e+00 3.827783203125000000e+02
3.200000000000000000e+01 5.986923076923076223e+02 3.064707946777343750e+02 -3.434051513671875000e+00 1.628028005361557007e-01 0.000000000000000000e+00 1.851237792968750000e+03 3.000000000000000000e+00 7.985486602783203125e+01
2.000000000000000000e+00 1.690999999999999659e+02 1.837989654541015625e+02 -1.059960937500000000e+01 9.710782170295715332e-01 0.000000000000000000e+00 9.074611206054687500e+02 1.000000000000000000e+00 6.328632812500000000e+02
7.000000000000000000e+00 3.110384615384616041e+02 1.957540435791015625e+02 -1.001394653320312500e+01 9.961180686950683594e-01 0.000000000000000000e+00 7.386467895507812500e+02 1.000000000000000000e+00 1.128204345703125000e+01
5.400000000000000000e+01 7.320538461538465071e+02 2.810459594726562500e+02 -1.081756591796875000e+00 0.000000000000000000e+00 0.000000000000000000e+00 2.363896728515625000e+03 4.000000000000000000e+00 3.902479248046875000e+02
5.000000000000000000e+00 2.852846153846152788e+02 1.908194274902343750e+02 -1.095251464843750000e+01 9.964380264282226562e-01 0.000000000000000000e+00 5.835137329101562500e+02 1.000000000000000000e+00 1.096403503417968750e+01
1.000000000000000000e+00 5.036538461538462457e+02 2.332227325439453125e+02 -1.076296997070312500e+01 9.755875468254089355e-01 0.000000000000000000e+00 7.441234741210937500e+02 1.000000000000000000e+00 2.877864685058593750e+02
4.300000000000000000e+01 3.722461538461537884e+02 1.752331695556640625e+02 -3.506195068359375000e+00 2.560800909996032715e-01 0.000000000000000000e+00 1.841236206054687500e+03 3.000000000000000000e+00 4.966006774902343750e+02
7.000000000000000000e+00 5.733461538461538112e+02 2.932834777832031250e+02 -3.717224121093750000e+00 9.999999776482582092e-03 0.000000000000000000e+00 1.232465454101562500e+03 1.000000000000000000e+00 2.740350952148437500e+02
0.000000000000000000e+00 1.115999999999999801e+02 9.470842742919921875e+01 -1.441119384765625000e+01 9.998332858085632324e-01 0.000000000000000000e+00 6.362451171875000000e+02 1.000000000000000000e+00 6.707458496093750000e+01
1.700000000000000000e+01 6.225769230769228670e+02 5.278691406250000000e+02 -3.635559082031250000e-01 1.708326488733291626e-01 6.470588445663452148e-01 1.076895629882812500e+03 2.000000000000000000e+00 9.225313720703125000e+02
1.100000000000000000e+01 8.526692307692309214e+02 3.330796203613281250e+02 -6.824951171875000000e-01 9.999999776482582092e-03 7.647058963775634766e-01 1.538495605468750000e+03 2.000000000000000000e+00 1.563198242187500000e+03
5.500000000000000000e+01 8.382230769230770875e+02 3.843036193847656250e+02 2.543609619140625000e+00 0.000000000000000000e+00 8.235294222831726074e-01 2.647251708984375000e+03 4.000000000000000000e+00 1.865707855224609375e+02
1.000000000000000000e+00 2.876153846153846985e+02 2.083136749267578125e+02 -1.591735839843750000e+01 9.999708533287048340e-01 0.000000000000000000e+00 2.323217315673828125e+02 1.000000000000000000e+00 4.892419128417968750e+02
2.000000000000000000e+00 5.388615384615383164e+02 3.340618591308593750e+02 2.626525878906250000e+00 0.000000000000000000e+00 0.000000000000000000e+00 2.444944580078125000e+03 1.000000000000000000e+00 6.931889648437500000e+02
4.800000000000000000e+01 4.993769230769232763e+02 5.220376586914062500e+02 1.414642333984375000e+00 0.000000000000000000e+00 7.647058963775634766e-01 2.415488769531250000e+03 4.000000000000000000e+00 1.668857910156250000e+03
0.000000000000000000e+00 2.493461538461538680e+02 1.864906463623046875e+02 -1.445913696289062500e+01 9.971997141838073730e-01 0.000000000000000000e+00 3.231157226562500000e+02 1.000000000000000000e+00 3.057669067382812500e+02
6.300000000000000000e+01 9.801461538461541068e+02 4.455589599609375000e+02 -4.092376708984375000e+00 1.841091364622116089e-01 0.000000000000000000e+00 1.433473510742187500e+03 4.000000000000000000e+00 4.176113586425781250e+02
0.000000000000000000e+00 1.900538461538462514e+02 1.844393005371093750e+02 -1.610873413085937500e+01 9.998864531517028809e-01 0.000000000000000000e+00 4.544409790039062500e+02 1.000000000000000000e+00 5.131730270385742188e+01
0.000000000000000000e+00 1.336692307692307793e+02 1.625144958496093750e+02 -1.409295654296875000e+01 9.997764229774475098e-01 0.000000000000000000e+00 6.555917358398437500e+02 1.000000000000000000e+00 1.565229320526123047e+01
