# Supplementary material for: Environmental Conditions for Alternative Tree Cover States in HighLatitudes
Source: Copernicus journal article supplement (doi:10.5194/bg-2016-401), 2016-10-11
Supplement: Supplementary file 4 [file bg-2016-401-supplement.zip › Analysis/files_to_load_and_import/commonlai_bor.txt]

-1.000000000000000000e+00
-1.000000000000000000e+00
7.500000000000000000e-01
-1.000000000000000000e+00
5.000000000000000000e-01
-1.000000000000000000e+00
7.500000000000000000e-01
-1.000000000000000000e+00
-1.000000000000000000e+00
-1.000000000000000000e+00
-1.000000000000000000e+00
-1.000000000000000000e+00
2.500000000000000000e-01
2.500000000000000000e-01
-1.000000000000000000e+00
-1.000000000000000000e+00
5.000000000000000000e-01
7.500000000000000000e-01
7.500000000000000000e-01
-0.000000000000000000e+00
-0.000000000000000000e+00
-1.000000000000000000e+00
7.500000000000000000e-01
5.000000000000000000e-01
-1.000000000000000000e+00
-1.000000000000000000e+00
2.500000000000000000e-01
-1.000000000000000000e+00
-1.000000000000000000e+00
-1.000000000000000000e+00
2.500000000000000000e-01
5.000000000000000000e-01
-1.000000000000000000e+00
-1.000000000000000000e+00
-1.000000000000000000e+00
-1.000000000000000000e+00
-1.000000000000000000e+00
-1.000000000000000000e+00
-1.000000000000000000e+00
5.000000000000000000e-01
2.500000000000000000e-01
-1.000000000000000000e+00
7.500000000000000000e-01
-1.000000000000000000e+00
2.500000000000000000e-01
-1.000000000000000000e+00
-0.000000000000000000e+00
5.000000000000000000e-01
5.000000000000000000e-01
7.500000000000000000e-01
5.000000000000000000e-01
5.000000000000000000e-01
5.000000000000000000e-01
7.500000000000000000e-01
7.500000000000000000e-01
7.500000000000000000e-01
7.500000000000000000e-01
-1.000000000000000000e+00
7.500000000000000000e-01
-1.000000000000000000e+00
-1.000000000000000000e+00
-1.000000000000000000e+00
7.500000000000000000e-01
5.000000000000000000e-01
-1.000000000000000000e+00
2.500000000000000000e-01
5.000000000000000000e-01
-0.000000000000000000e+00
-0.000000000000000000e+00
-1.000000000000000000e+00
-1.000000000000000000e+00
-1.000000000000000000e+00
-0.000000000000000000e+00
-0.000000000000000000e+00
-0.000000000000000000e+00
-1.000000000000000000e+00
-1.000000000000000000e+00
2.500000000000000000e-01
-0.000000000000000000e+00
-1.000000000000000000e+00
-0.000000000000000000e+00
-0.000000000000000000e+00
-0.000000000000000000e+00
-0.000000000000000000e+00
-1.000000000000000000e+00
-1.000000000000000000e+00
-0.000000000000000000e+00
5.000000000000000000e-01
-0.000000000000000000e+00
-1.000000000000000000e+00
-1.000000000000000000e+00
-0.000000000000000000e+00
-0.000000000000000000e+00
5.000000000000000000e-01
-1.000000000000000000e+00
7.500000000000000000e-01
5.000000000000000000e-01
-1.000000000000000000e+00
-1.000000000000000000e+00
-0.000000000000000000e+00
-1.000000000000000000e+00
5.000000000000000000e-01
7.500000000000000000e-01
7.500000000000000000e-01
-0.000000000000000000e+00
-0.000000000000000000e+00
-1.000000000000000000e+00
-1.000000000000000000e+00
7.500000000000000000e-01
5.000000000000000000e-01
-0.000000000000000000e+00
2.500000000000000000e-01
5.000000000000000000e-01
2.500000000000000000e-01
2.500000000000000000e-01
-1.000000000000000000e+00
-1.000000000000000000e+00
-1.000000000000000000e+00
-0.000000000000000000e+00
-0.000000000000000000e+00
-0.000000000000000000e+00
-0.000000000000000000e+00
5.000000000000000000e-01
5.000000000000000000e-01
-1.000000000000000000e+00
-0.000000000000000000e+00
5.000000000000000000e-01
-1.000000000000000000e+00
7.500000000000000000e-01
-0.000000000000000000e+00
5.000000000000000000e-01
0.000000000000000000e+00
-1.000000000000000000e+00
-1.000000000000000000e+00
5.000000000000000000e-01
2.500000000000000000e-01
-0.000000000000000000e+00
-1.000000000000000000e+00
-1.000000000000000000e+00
-1.000000000000000000e+00
-0.000000000000000000e+00
-0.000000000000000000e+00
5.000000000000000000e-01
-1.000000000000000000e+00
5.000000000000000000e-01
7.500000000000000000e-01
-1.000000000000000000e+00
-1.000000000000000000e+00
5.000000000000000000e-01
5.000000000000000000e-01
-1.000000000000000000e+00
2.500000000000000000e-01
-1.000000000000000000e+00
-1.000000000000000000e+00
-1.000000000000000000e+00
-1.000000000000000000e+00
-1.000000000000000000e+00
0.000000000000000000e+00
-1.000000000000000000e+00
0.000000000000000000e+00
-1.000000000000000000e+00
-1.000000000000000000e+00
2.500000000000000000e-01
-1.000000000000000000e+00
7.500000000000000000e-01
-1.000000000000000000e+00
-0.000000000000000000e+00
-1.000000000000000000e+00
-1.000000000000000000e+00
-0.000000000000000000e+00
-1.000000000000000000e+00
5.000000000000000000e-01
7.500000000000000000e-01
5.000000000000000000e-01
-1.000000000000000000e+00
7.500000000000000000e-01
-0.000000000000000000e+00
-1.000000000000000000e+00
5.000000000000000000e-01
7.500000000000000000e-01
7.500000000000000000e-01
-1.000000000000000000e+00
0.000000000000000000e+00
7.500000000000000000e-01
5.000000000000000000e-01
-1.000000000000000000e+00
-0.000000000000000000e+00
5.000000000000000000e-01
-1.000000000000000000e+00
5.000000000000000000e-01
2.500000000000000000e-01
-1.000000000000000000e+00
5.000000000000000000e-01
5.000000000000000000e-01
7.500000000000000000e-01
-1.000000000000000000e+00
7.500000000000000000e-01
2.500000000000000000e-01
2.500000000000000000e-01
-1.000000000000000000e+00
-1.000000000000000000e+00
-0.000000000000000000e+00
7.500000000000000000e-01
-0.000000000000000000e+00
-1.000000000000000000e+00
5.000000000000000000e-01
-0.000000000000000000e+00
5.000000000000000000e-01
-1.000000000000000000e+00
5.000000000000000000e-01
-1.000000000000000000e+00
7.500000000000000000e-01
-1.000000000000000000e+00
2.500000000000000000e-01
-0.000000000000000000e+00
-1.000000000000000000e+00
-1.000000000000000000e+00
-1.000000000000000000e+00
0.000000000000000000e+00
-1.000000000000000000e+00
5.000000000000000000e-01
2.500000000000000000e-01
-1.000000000000000000e+00
7.500000000000000000e-01
7.500000000000000000e-01
-1.000000000000000000e+00
-1.000000000000000000e+00
-1.000000000000000000e+00
-1.000000000000000000e+00
-1.000000000000000000e+00
-1.000000000000000000e+00
-1.000000000000000000e+00
-1.000000000000000000e+00
5.000000000000000000e-01
-1.000000000000000000e+00
-1.000000000000000000e+00
7.500000000000000000e-01
-1.000000000000000000e+00
7.500000000000000000e-01
-1.000000000000000000e+00
-1.000000000000000000e+00
2.500000000000000000e-01
-1.000000000000000000e+00
5.000000000000000000e-01
-1.000000000000000000e+00
-1.000000000000000000e+00
-1.000000000000000000e+00
5.000000000000000000e-01
5.000000000000000000e-01
-1.000000000000000000e+00
2.500000000000000000e-01
7.500000000000000000e-01
-1.000000000000000000e+00
-1.000000000000000000e+00
-0.000000000000000000e+00
2.500000000000000000e-01
-0.000000000000000000e+00
-1.000000000000000000e+00
-0.000000000000000000e+00
-0.000000000000000000e+00
-0.000000000000000000e+00
-0.000000000000000000e+00
-0.000000000000000000e+00
-0.000000000000000000e+00
-0.000000000000000000e+00
-0.000000000000000000e+00
2.500000000000000000e-01
7.500000000000000000e-01
7.500000000000000000e-01
-1.000000000000000000e+00
5.000000000000000000e-01
7.500000000000000000e-01
-0.000000000000000000e+00
-0.000000000000000000e+00
5.000000000000000000e-01
7.500000000000000000e-01
-0.000000000000000000e+00
-0.000000000000000000e+00
-1.000000000000000000e+00
2.500000000000000000e-01
-0.000000000000000000e+00
-0.000000000000000000e+00
2.500000000000000000e-01
-1.000000000000000000e+00
5.000000000000000000e-01
7.500000000000000000e-01
-0.000000000000000000e+00
5.000000000000000000e-01
-0.000000000000000000e+00
7.500000000000000000e-01
-1.000000000000000000e+00
2.500000000000000000e-01
2.500000000000000000e-01
-0.000000000000000000e+00
-0.000000000000000000e+00
-1.000000000000000000e+00
-0.000000000000000000e+00
7.500000000000000000e-01
2.500000000000000000e-01
5.000000000000000000e-01
-0.000000000000000000e+00
-0.000000000000000000e+00
7.500000000000000000e-01
2.500000000000000000e-01
2.500000000000000000e-01
-1.000000000000000000e+00
-0.000000000000000000e+00
-0.000000000000000000e+00
-0.000000000000000000e+00
5.000000000000000000e-01
-1.000000000000000000e+00
-1.000000000000000000e+00
-1.000000000000000000e+00
-1.000000000000000000e+00
-1.000000000000000000e+00
-1.000000000000000000e+00
-1.000000000000000000e+00
-1.000000000000000000e+00
-1.000000000000000000e+00
-1.000000000000000000e+00
-1.000000000000000000e+00
-1.000000000000000000e+00
-1.000000000000000000e+00
-1.000000000000000000e+00
-1.000000000000000000e+00
-1.000000000000000000e+00
7.500000000000000000e-01
-1.000000000000000000e+00
-1.000000000000000000e+00
-1.000000000000000000e+00
-1.000000000000000000e+00
-1.000000000000000000e+00
-1.000000000000000000e+00
-1.000000000000000000e+00
-1.000000000000000000e+00
-1.000000000000000000e+00
-1.000000000000000000e+00
-1.000000000000000000e+00
-1.000000000000000000e+00
-1.000000000000000000e+00
-1.000000000000000000e+00
-1.000000000000000000e+00
-1.000000000000000000e+00
-1.000000000000000000e+00
-1.000000000000000000e+00
-1.000000000000000000e+00
-1.000000000000000000e+00
-1.000000000000000000e+00
-1.000000000000000000e+00
-1.000000000000000000e+00
-1.000000000000000000e+00
-1.000000000000000000e+00
-1.000000000000000000e+00
-1.000000000000000000e+00
-1.000000000000000000e+00
-1.000000000000000000e+00
-1.000000000000000000e+00
-1.000000000000000000e+00
-1.000000000000000000e+00
-1.000000000000000000e+00
-1.000000000000000000e+00
-1.000000000000000000e+00
-1.000000000000000000e+00
-1.000000000000000000e+00
-1.000000000000000000e+00
-1.000000000000000000e+00
-1.000000000000000000e+00
-1.000000000000000000e+00
7.500000000000000000e-01
-1.000000000000000000e+00
-1.000000000000000000e+00
-1.000000000000000000e+00
-1.000000000000000000e+00
-1.000000000000000000e+00
-1.000000000000000000e+00
-1.000000000000000000e+00
-1.000000000000000000e+00
-1.000000000000000000e+00
-1.000000000000000000e+00
-1.000000000000000000e+00
-1.000000000000000000e+00
-1.000000000000000000e+00
-1.000000000000000000e+00
-1.000000000000000000e+00
-1.000000000000000000e+00
-1.000000000000000000e+00
-1.000000000000000000e+00
-1.000000000000000000e+00
-1.000000000000000000e+00
-1.000000000000000000e+00
-1.000000000000000000e+00
-1.000000000000000000e+00
-1.000000000000000000e+00
-1.000000000000000000e+00
-1.000000000000000000e+00
-1.000000000000000000e+00
-1.000000000000000000e+00
2.500000000000000000e-01
-1.000000000000000000e+00
-1.000000000000000000e+00
-1.000000000000000000e+00
-1.000000000000000000e+00
-1.000000000000000000e+00
-1.000000000000000000e+00
-1.000000000000000000e+00
-1.000000000000000000e+00
-1.000000000000000000e+00
-1.000000000000000000e+00
5.000000000000000000e-01
7.500000000000000000e-01
-1.000000000000000000e+00
-1.000000000000000000e+00
-1.000000000000000000e+00
-1.000000000000000000e+00
-1.000000000000000000e+00
-1.000000000000000000e+00
-1.000000000000000000e+00
-1.000000000000000000e+00
-1.000000000000000000e+00
-1.000000000000000000e+00
-1.000000000000000000e+00
-1.000000000000000000e+00
-1.000000000000000000e+00
-1.000000000000000000e+00
-1.000000000000000000e+00
-1.000000000000000000e+00
-1.000000000000000000e+00
-1.000000000000000000e+00
-1.000000000000000000e+00
-1.000000000000000000e+00
-1.000000000000000000e+00
-1.000000000000000000e+00
-1.000000000000000000e+00
-1.000000000000000000e+00
-1.000000000000000000e+00
-1.000000000000000000e+00
-1.000000000000000000e+00
-1.000000000000000000e+00
-1.000000000000000000e+00
-1.000000000000000000e+00
-1.000000000000000000e+00
-1.000000000000000000e+00
-1.000000000000000000e+00
-1.000000000000000000e+00
-1.000000000000000000e+00
-1.000000000000000000e+00
-1.000000000000000000e+00
-1.000000000000000000e+00
-1.000000000000000000e+00
-1.000000000000000000e+00
-1.000000000000000000e+00
-1.000000000000000000e+00
-1.000000000000000000e+00
-1.000000000000000000e+00
-1.000000000000000000e+00
-1.000000000000000000e+00
-1.000000000000000000e+00
-1.000000000000000000e+00
-1.000000000000000000e+00
-1.000000000000000000e+00
-1.000000000000000000e+00
-1.000000000000000000e+00
-1.000000000000000000e+00
-1.000000000000000000e+00
-1.000000000000000000e+00
-1.000000000000000000e+00
-1.000000000000000000e+00
-1.000000000000000000e+00
-1.000000000000000000e+00
-1.000000000000000000e+00
-1.000000000000000000e+00
-1.000000000000000000e+00
-1.000000000000000000e+00
-1.000000000000000000e+00
-1.000000000000000000e+00
-1.000000000000000000e+00
-1.000000000000000000e+00
-1.000000000000000000e+00
-1.000000000000000000e+00
-1.000000000000000000e+00
-1.000000000000000000e+00
-1.000000000000000000e+00
-1.000000000000000000e+00
