# Supplementary material for: Environmental Conditions for Alternative Tree Cover States in HighLatitudes
Source: Copernicus journal article supplement (doi:10.5194/bg-2016-401), 2016-10-11
Supplement: Supplementary file 4 [file bg-2016-401-supplement.zip › Analysis/files_to_load_and_import/commonlats_bor.txt]

6.225000000000000000e+01
6.225000000000000000e+01
6.275000000000000000e+01
6.375000000000000000e+01
6.375000000000000000e+01
6.375000000000000000e+01
6.425000000000000000e+01
6.475000000000000000e+01
6.475000000000000000e+01
6.475000000000000000e+01
6.475000000000000000e+01
6.525000000000000000e+01
6.525000000000000000e+01
6.525000000000000000e+01
6.575000000000000000e+01
6.575000000000000000e+01
6.625000000000000000e+01
6.675000000000000000e+01
6.675000000000000000e+01
6.675000000000000000e+01
6.725000000000000000e+01
6.725000000000000000e+01
6.725000000000000000e+01
6.725000000000000000e+01
6.275000000000000000e+01
6.275000000000000000e+01
6.325000000000000000e+01
6.325000000000000000e+01
6.425000000000000000e+01
6.475000000000000000e+01
6.475000000000000000e+01
6.475000000000000000e+01
6.475000000000000000e+01
6.575000000000000000e+01
6.625000000000000000e+01
5.925000000000000000e+01
5.925000000000000000e+01
5.925000000000000000e+01
5.975000000000000000e+01
6.025000000000000000e+01
6.025000000000000000e+01
6.025000000000000000e+01
6.025000000000000000e+01
6.025000000000000000e+01
6.025000000000000000e+01
6.075000000000000000e+01
6.075000000000000000e+01
6.075000000000000000e+01
6.075000000000000000e+01
6.125000000000000000e+01
6.125000000000000000e+01
6.125000000000000000e+01
6.125000000000000000e+01
5.975000000000000000e+01
5.975000000000000000e+01
5.975000000000000000e+01
5.975000000000000000e+01
5.975000000000000000e+01
6.025000000000000000e+01
6.025000000000000000e+01
6.025000000000000000e+01
6.025000000000000000e+01
6.075000000000000000e+01
6.125000000000000000e+01
6.275000000000000000e+01
6.275000000000000000e+01
6.275000000000000000e+01
6.275000000000000000e+01
6.275000000000000000e+01
6.325000000000000000e+01
6.325000000000000000e+01
6.325000000000000000e+01
6.325000000000000000e+01
6.325000000000000000e+01
6.325000000000000000e+01
6.375000000000000000e+01
6.375000000000000000e+01
6.375000000000000000e+01
6.375000000000000000e+01
6.375000000000000000e+01
6.375000000000000000e+01
6.375000000000000000e+01
6.375000000000000000e+01
6.375000000000000000e+01
6.425000000000000000e+01
6.425000000000000000e+01
6.425000000000000000e+01
6.475000000000000000e+01
6.475000000000000000e+01
6.475000000000000000e+01
6.475000000000000000e+01
6.475000000000000000e+01
6.475000000000000000e+01
6.475000000000000000e+01
6.525000000000000000e+01
6.525000000000000000e+01
6.525000000000000000e+01
6.525000000000000000e+01
6.525000000000000000e+01
6.525000000000000000e+01
6.575000000000000000e+01
6.575000000000000000e+01
6.575000000000000000e+01
6.625000000000000000e+01
6.625000000000000000e+01
6.625000000000000000e+01
6.625000000000000000e+01
6.675000000000000000e+01
6.675000000000000000e+01
6.675000000000000000e+01
6.675000000000000000e+01
6.725000000000000000e+01
6.725000000000000000e+01
6.725000000000000000e+01
6.725000000000000000e+01
6.775000000000000000e+01
6.775000000000000000e+01
6.775000000000000000e+01
6.825000000000000000e+01
6.825000000000000000e+01
6.825000000000000000e+01
6.825000000000000000e+01
6.825000000000000000e+01
6.825000000000000000e+01
6.875000000000000000e+01
6.875000000000000000e+01
6.275000000000000000e+01
6.325000000000000000e+01
6.325000000000000000e+01
6.325000000000000000e+01
6.325000000000000000e+01
6.325000000000000000e+01
6.325000000000000000e+01
6.375000000000000000e+01
6.375000000000000000e+01
6.425000000000000000e+01
6.475000000000000000e+01
6.675000000000000000e+01
6.675000000000000000e+01
6.725000000000000000e+01
6.775000000000000000e+01
6.775000000000000000e+01
6.775000000000000000e+01
6.125000000000000000e+01
6.125000000000000000e+01
6.175000000000000000e+01
6.275000000000000000e+01
6.275000000000000000e+01
6.325000000000000000e+01
6.325000000000000000e+01
6.375000000000000000e+01
6.375000000000000000e+01
6.425000000000000000e+01
6.425000000000000000e+01
5.975000000000000000e+01
5.975000000000000000e+01
6.025000000000000000e+01
6.125000000000000000e+01
6.175000000000000000e+01
6.175000000000000000e+01
6.175000000000000000e+01
6.175000000000000000e+01
6.175000000000000000e+01
6.225000000000000000e+01
6.325000000000000000e+01
5.875000000000000000e+01
5.975000000000000000e+01
5.975000000000000000e+01
6.025000000000000000e+01
6.025000000000000000e+01
6.075000000000000000e+01
6.075000000000000000e+01
6.075000000000000000e+01
6.075000000000000000e+01
6.125000000000000000e+01
6.125000000000000000e+01
6.125000000000000000e+01
6.175000000000000000e+01
6.175000000000000000e+01
6.225000000000000000e+01
6.225000000000000000e+01
6.225000000000000000e+01
6.275000000000000000e+01
6.275000000000000000e+01
6.275000000000000000e+01
6.275000000000000000e+01
6.275000000000000000e+01
6.325000000000000000e+01
6.325000000000000000e+01
6.325000000000000000e+01
6.325000000000000000e+01
6.375000000000000000e+01
6.425000000000000000e+01
5.925000000000000000e+01
5.925000000000000000e+01
5.975000000000000000e+01
5.975000000000000000e+01
5.975000000000000000e+01
5.975000000000000000e+01
5.975000000000000000e+01
6.025000000000000000e+01
6.025000000000000000e+01
6.025000000000000000e+01
6.025000000000000000e+01
6.075000000000000000e+01
6.075000000000000000e+01
6.075000000000000000e+01
6.075000000000000000e+01
6.125000000000000000e+01
6.125000000000000000e+01
6.175000000000000000e+01
6.175000000000000000e+01
6.175000000000000000e+01
6.175000000000000000e+01
6.225000000000000000e+01
6.225000000000000000e+01
6.225000000000000000e+01
6.275000000000000000e+01
5.125000000000000000e+01
5.175000000000000000e+01
5.175000000000000000e+01
5.225000000000000000e+01
5.225000000000000000e+01
5.275000000000000000e+01
5.275000000000000000e+01
5.275000000000000000e+01
5.325000000000000000e+01
5.325000000000000000e+01
5.375000000000000000e+01
5.375000000000000000e+01
5.375000000000000000e+01
5.375000000000000000e+01
5.425000000000000000e+01
5.425000000000000000e+01
5.425000000000000000e+01
5.425000000000000000e+01
5.475000000000000000e+01
5.475000000000000000e+01
5.475000000000000000e+01
5.525000000000000000e+01
5.525000000000000000e+01
5.525000000000000000e+01
5.575000000000000000e+01
5.575000000000000000e+01
5.575000000000000000e+01
5.575000000000000000e+01
5.625000000000000000e+01
5.625000000000000000e+01
5.625000000000000000e+01
5.675000000000000000e+01
5.675000000000000000e+01
5.325000000000000000e+01
5.475000000000000000e+01
5.525000000000000000e+01
5.575000000000000000e+01
5.575000000000000000e+01
5.625000000000000000e+01
5.675000000000000000e+01
5.725000000000000000e+01
5.775000000000000000e+01
5.775000000000000000e+01
5.825000000000000000e+01
5.875000000000000000e+01
5.875000000000000000e+01
5.925000000000000000e+01
5.975000000000000000e+01
6.025000000000000000e+01
6.175000000000000000e+01
6.225000000000000000e+01
6.225000000000000000e+01
6.275000000000000000e+01
6.275000000000000000e+01
6.275000000000000000e+01
5.725000000000000000e+01
5.725000000000000000e+01
5.725000000000000000e+01
5.725000000000000000e+01
5.725000000000000000e+01
5.775000000000000000e+01
5.825000000000000000e+01
5.875000000000000000e+01
5.875000000000000000e+01
5.925000000000000000e+01
5.925000000000000000e+01
5.925000000000000000e+01
5.975000000000000000e+01
5.975000000000000000e+01
5.975000000000000000e+01
5.975000000000000000e+01
5.975000000000000000e+01
5.975000000000000000e+01
5.975000000000000000e+01
6.025000000000000000e+01
6.025000000000000000e+01
6.025000000000000000e+01
6.025000000000000000e+01
6.025000000000000000e+01
6.075000000000000000e+01
6.075000000000000000e+01
6.075000000000000000e+01
6.075000000000000000e+01
6.075000000000000000e+01
6.075000000000000000e+01
6.175000000000000000e+01
6.175000000000000000e+01
6.175000000000000000e+01
6.225000000000000000e+01
6.225000000000000000e+01
6.225000000000000000e+01
6.225000000000000000e+01
5.225000000000000000e+01
5.425000000000000000e+01
5.425000000000000000e+01
5.475000000000000000e+01
5.475000000000000000e+01
5.525000000000000000e+01
5.525000000000000000e+01
5.525000000000000000e+01
5.575000000000000000e+01
5.625000000000000000e+01
5.625000000000000000e+01
5.625000000000000000e+01
5.625000000000000000e+01
5.675000000000000000e+01
5.675000000000000000e+01
5.675000000000000000e+01
5.675000000000000000e+01
5.675000000000000000e+01
5.725000000000000000e+01
5.725000000000000000e+01
5.725000000000000000e+01
5.725000000000000000e+01
5.725000000000000000e+01
5.725000000000000000e+01
5.775000000000000000e+01
5.325000000000000000e+01
5.325000000000000000e+01
5.375000000000000000e+01
5.375000000000000000e+01
5.375000000000000000e+01
5.375000000000000000e+01
5.425000000000000000e+01
5.475000000000000000e+01
5.475000000000000000e+01
5.475000000000000000e+01
5.475000000000000000e+01
5.525000000000000000e+01
5.625000000000000000e+01
5.625000000000000000e+01
5.675000000000000000e+01
5.675000000000000000e+01
5.725000000000000000e+01
5.725000000000000000e+01
5.775000000000000000e+01
4.525000000000000000e+01
4.525000000000000000e+01
4.575000000000000000e+01
4.575000000000000000e+01
4.625000000000000000e+01
4.625000000000000000e+01
4.675000000000000000e+01
4.775000000000000000e+01
4.825000000000000000e+01
4.825000000000000000e+01
4.825000000000000000e+01
4.825000000000000000e+01
4.825000000000000000e+01
4.875000000000000000e+01
4.875000000000000000e+01
4.925000000000000000e+01
4.925000000000000000e+01
4.975000000000000000e+01
4.525000000000000000e+01
4.525000000000000000e+01
4.525000000000000000e+01
4.525000000000000000e+01
4.525000000000000000e+01
4.525000000000000000e+01
4.525000000000000000e+01
4.525000000000000000e+01
4.525000000000000000e+01
4.575000000000000000e+01
4.575000000000000000e+01
4.575000000000000000e+01
4.575000000000000000e+01
4.575000000000000000e+01
4.575000000000000000e+01
4.575000000000000000e+01
4.625000000000000000e+01
4.625000000000000000e+01
4.625000000000000000e+01
4.625000000000000000e+01
4.625000000000000000e+01
4.675000000000000000e+01
4.675000000000000000e+01
4.675000000000000000e+01
4.725000000000000000e+01
4.725000000000000000e+01
4.775000000000000000e+01
4.825000000000000000e+01
4.825000000000000000e+01
4.875000000000000000e+01
4.875000000000000000e+01
4.875000000000000000e+01
4.875000000000000000e+01
4.875000000000000000e+01
4.925000000000000000e+01
4.925000000000000000e+01
4.925000000000000000e+01
4.925000000000000000e+01
5.025000000000000000e+01
5.025000000000000000e+01
5.125000000000000000e+01
5.375000000000000000e+01
5.475000000000000000e+01
5.475000000000000000e+01
5.625000000000000000e+01
5.675000000000000000e+01
5.675000000000000000e+01
5.725000000000000000e+01
5.725000000000000000e+01
5.775000000000000000e+01
5.775000000000000000e+01
5.775000000000000000e+01
5.775000000000000000e+01
5.825000000000000000e+01
5.825000000000000000e+01
5.825000000000000000e+01
5.825000000000000000e+01
5.875000000000000000e+01
5.875000000000000000e+01
5.875000000000000000e+01
5.925000000000000000e+01
5.975000000000000000e+01
5.975000000000000000e+01
5.975000000000000000e+01
5.275000000000000000e+01
5.375000000000000000e+01
5.425000000000000000e+01
5.525000000000000000e+01
5.625000000000000000e+01
5.625000000000000000e+01
5.675000000000000000e+01
5.675000000000000000e+01
5.675000000000000000e+01
5.675000000000000000e+01
5.725000000000000000e+01
5.725000000000000000e+01
5.725000000000000000e+01
5.725000000000000000e+01
5.725000000000000000e+01
5.725000000000000000e+01
5.725000000000000000e+01
5.725000000000000000e+01
5.725000000000000000e+01
5.775000000000000000e+01
5.775000000000000000e+01
5.775000000000000000e+01
5.775000000000000000e+01
5.775000000000000000e+01
5.775000000000000000e+01
5.775000000000000000e+01
5.775000000000000000e+01
5.775000000000000000e+01
5.775000000000000000e+01
5.825000000000000000e+01
5.825000000000000000e+01
5.825000000000000000e+01
5.825000000000000000e+01
5.825000000000000000e+01
5.875000000000000000e+01
5.875000000000000000e+01
5.875000000000000000e+01
5.875000000000000000e+01
5.875000000000000000e+01
5.875000000000000000e+01
5.875000000000000000e+01
5.875000000000000000e+01
5.925000000000000000e+01
5.925000000000000000e+01
5.925000000000000000e+01
5.925000000000000000e+01
5.925000000000000000e+01
