# Supplementary material for: Environmental Conditions for Alternative Tree Cover States in HighLatitudes
Source: Copernicus journal article supplement (doi:10.5194/bg-2016-401), 2016-10-11
Supplement: Supplementary file 4 [file bg-2016-401-supplement.zip › Analysis/files_to_load_and_import/commonlons_bor.txt]

9.075000000000000000e+01
9.125000000000000000e+01
9.075000000000000000e+01
8.925000000000000000e+01
8.975000000000000000e+01
9.025000000000000000e+01
8.925000000000000000e+01
8.625000000000000000e+01
8.725000000000000000e+01
8.875000000000000000e+01
8.975000000000000000e+01
8.625000000000000000e+01
8.825000000000000000e+01
8.875000000000000000e+01
8.675000000000000000e+01
8.825000000000000000e+01
8.275000000000000000e+01
8.125000000000000000e+01
8.175000000000000000e+01
8.275000000000000000e+01
8.075000000000000000e+01
8.125000000000000000e+01
8.225000000000000000e+01
8.275000000000000000e+01
9.025000000000000000e+01
9.175000000000000000e+01
8.975000000000000000e+01
9.075000000000000000e+01
9.025000000000000000e+01
8.125000000000000000e+01
8.225000000000000000e+01
8.525000000000000000e+01
8.825000000000000000e+01
8.875000000000000000e+01
8.825000000000000000e+01
8.275000000000000000e+01
8.525000000000000000e+01
8.675000000000000000e+01
8.325000000000000000e+01
7.625000000000000000e+01
7.725000000000000000e+01
9.975000000000000000e+01
1.002500000000000000e+02
1.052500000000000000e+02
1.227500000000000000e+02
7.475000000000000000e+01
1.032500000000000000e+02
1.142500000000000000e+02
1.152500000000000000e+02
7.725000000000000000e+01
1.032500000000000000e+02
1.107500000000000000e+02
1.112500000000000000e+02
7.475000000000000000e+01
7.575000000000000000e+01
7.775000000000000000e+01
7.875000000000000000e+01
8.475000000000000000e+01
7.175000000000000000e+01
7.675000000000000000e+01
8.075000000000000000e+01
8.125000000000000000e+01
8.075000000000000000e+01
6.875000000000000000e+01
1.247500000000000000e+02
1.252500000000000000e+02
1.257500000000000000e+02
1.272500000000000000e+02
1.277500000000000000e+02
1.242500000000000000e+02
1.247500000000000000e+02
1.252500000000000000e+02
1.277500000000000000e+02
1.347500000000000000e+02
1.537500000000000000e+02
1.242500000000000000e+02
1.247500000000000000e+02
1.252500000000000000e+02
1.257500000000000000e+02
1.262500000000000000e+02
1.292500000000000000e+02
1.297500000000000000e+02
1.537500000000000000e+02
1.542500000000000000e+02
1.237500000000000000e+02
1.242500000000000000e+02
1.272500000000000000e+02
1.122500000000000000e+02
1.127500000000000000e+02
1.142500000000000000e+02
1.227500000000000000e+02
1.242500000000000000e+02
1.507500000000000000e+02
1.527500000000000000e+02
1.127500000000000000e+02
1.217500000000000000e+02
1.222500000000000000e+02
1.227500000000000000e+02
1.502500000000000000e+02
1.512500000000000000e+02
1.222500000000000000e+02
1.507500000000000000e+02
1.517500000000000000e+02
1.212500000000000000e+02
1.487500000000000000e+02
1.497500000000000000e+02
1.517500000000000000e+02
1.177500000000000000e+02
1.502500000000000000e+02
1.512500000000000000e+02
1.532500000000000000e+02
1.502500000000000000e+02
1.507500000000000000e+02
1.517500000000000000e+02
1.522500000000000000e+02
1.007500000000000000e+02
1.027500000000000000e+02
1.047500000000000000e+02
1.107500000000000000e+02
1.117500000000000000e+02
1.132500000000000000e+02
1.137500000000000000e+02
1.147500000000000000e+02
1.187500000000000000e+02
1.077500000000000000e+02
1.187500000000000000e+02
1.262500000000000000e+02
1.257500000000000000e+02
1.262500000000000000e+02
1.267500000000000000e+02
1.272500000000000000e+02
1.282500000000000000e+02
1.292500000000000000e+02
1.282500000000000000e+02
1.302500000000000000e+02
1.227500000000000000e+02
1.537500000000000000e+02
1.192500000000000000e+02
1.207500000000000000e+02
1.182500000000000000e+02
1.197500000000000000e+02
1.202500000000000000e+02
1.207500000000000000e+02
8.525000000000000000e+01
8.575000000000000000e+01
8.675000000000000000e+01
8.675000000000000000e+01
8.925000000000000000e+01
7.625000000000000000e+01
8.925000000000000000e+01
8.575000000000000000e+01
8.725000000000000000e+01
8.575000000000000000e+01
8.725000000000000000e+01
9.125000000000000000e+01
9.175000000000000000e+01
9.075000000000000000e+01
9.075000000000000000e+01
8.525000000000000000e+01
8.725000000000000000e+01
8.825000000000000000e+01
8.875000000000000000e+01
8.925000000000000000e+01
8.575000000000000000e+01
8.425000000000000000e+01
1.217500000000000000e+02
9.975000000000000000e+01
1.222500000000000000e+02
1.012500000000000000e+02
1.022500000000000000e+02
8.425000000000000000e+01
1.042500000000000000e+02
1.107500000000000000e+02
1.157500000000000000e+02
8.375000000000000000e+01
8.975000000000000000e+01
1.027500000000000000e+02
1.032500000000000000e+02
1.037500000000000000e+02
8.475000000000000000e+01
8.525000000000000000e+01
8.975000000000000000e+01
8.325000000000000000e+01
8.375000000000000000e+01
8.425000000000000000e+01
8.575000000000000000e+01
8.625000000000000000e+01
8.475000000000000000e+01
8.525000000000000000e+01
8.575000000000000000e+01
8.675000000000000000e+01
8.475000000000000000e+01
8.525000000000000000e+01
1.017500000000000000e+02
1.027500000000000000e+02
9.075000000000000000e+01
1.002500000000000000e+02
1.007500000000000000e+02
1.022500000000000000e+02
1.227500000000000000e+02
9.125000000000000000e+01
1.007500000000000000e+02
1.042500000000000000e+02
1.047500000000000000e+02
8.375000000000000000e+01
9.025000000000000000e+01
1.047500000000000000e+02
1.147500000000000000e+02
9.025000000000000000e+01
1.037500000000000000e+02
9.025000000000000000e+01
9.075000000000000000e+01
9.125000000000000000e+01
1.042500000000000000e+02
8.825000000000000000e+01
8.875000000000000000e+01
8.925000000000000000e+01
8.975000000000000000e+01
5.925000000000000000e+01
5.775000000000000000e+01
6.025000000000000000e+01
6.025000000000000000e+01
6.225000000000000000e+01
6.075000000000000000e+01
6.125000000000000000e+01
6.225000000000000000e+01
6.175000000000000000e+01
6.375000000000000000e+01
6.025000000000000000e+01
6.125000000000000000e+01
6.175000000000000000e+01
6.375000000000000000e+01
6.025000000000000000e+01
6.175000000000000000e+01
6.475000000000000000e+01
6.625000000000000000e+01
6.075000000000000000e+01
6.175000000000000000e+01
6.775000000000000000e+01
6.125000000000000000e+01
6.375000000000000000e+01
6.525000000000000000e+01
6.325000000000000000e+01
6.425000000000000000e+01
6.525000000000000000e+01
6.575000000000000000e+01
6.275000000000000000e+01
6.475000000000000000e+01
6.575000000000000000e+01
6.275000000000000000e+01
6.575000000000000000e+01
6.425000000000000000e+01
6.025000000000000000e+01
6.075000000000000000e+01
6.375000000000000000e+01
6.475000000000000000e+01
6.525000000000000000e+01
6.775000000000000000e+01
4.575000000000000000e+01
4.525000000000000000e+01
4.575000000000000000e+01
3.975000000000000000e+01
4.275000000000000000e+01
4.525000000000000000e+01
4.625000000000000000e+01
4.425000000000000000e+01
4.925000000000000000e+01
5.525000000000000000e+01
5.425000000000000000e+01
5.475000000000000000e+01
5.125000000000000000e+01
5.175000000000000000e+01
5.325000000000000000e+01
4.375000000000000000e+01
4.475000000000000000e+01
5.025000000000000000e+01
5.075000000000000000e+01
5.125000000000000000e+01
4.475000000000000000e+01
4.525000000000000000e+01
3.875000000000000000e+01
4.675000000000000000e+01
4.275000000000000000e+01
4.475000000000000000e+01
4.525000000000000000e+01
4.075000000000000000e+01
4.125000000000000000e+01
4.175000000000000000e+01
4.225000000000000000e+01
4.275000000000000000e+01
4.325000000000000000e+01
4.375000000000000000e+01
4.175000000000000000e+01
4.275000000000000000e+01
4.325000000000000000e+01
4.425000000000000000e+01
4.975000000000000000e+01
4.175000000000000000e+01
4.325000000000000000e+01
4.925000000000000000e+01
4.975000000000000000e+01
5.125000000000000000e+01
5.275000000000000000e+01
5.175000000000000000e+01
5.225000000000000000e+01
5.275000000000000000e+01
5.125000000000000000e+01
5.175000000000000000e+01
5.225000000000000000e+01
5.325000000000000000e+01
-6.575000000000000000e+01
-6.775000000000000000e+01
-6.725000000000000000e+01
-6.825000000000000000e+01
-6.725000000000000000e+01
-6.825000000000000000e+01
-6.775000000000000000e+01
-6.475000000000000000e+01
-6.425000000000000000e+01
-7.325000000000000000e+01
-7.075000000000000000e+01
-6.475000000000000000e+01
-6.275000000000000000e+01
-7.075000000000000000e+01
-7.025000000000000000e+01
-6.925000000000000000e+01
-6.525000000000000000e+01
-6.225000000000000000e+01
-7.025000000000000000e+01
-6.875000000000000000e+01
-6.825000000000000000e+01
-6.775000000000000000e+01
-6.675000000000000000e+01
-6.625000000000000000e+01
-6.775000000000000000e+01
-6.625000000000000000e+01
-6.525000000000000000e+01
-6.725000000000000000e+01
-6.675000000000000000e+01
-6.625000000000000000e+01
-6.575000000000000000e+01
-6.675000000000000000e+01
-6.775000000000000000e+01
-6.625000000000000000e+01
-6.575000000000000000e+01
-6.525000000000000000e+01
-6.725000000000000000e+01
-7.025000000000000000e+01
-6.975000000000000000e+01
-6.875000000000000000e+01
-6.775000000000000000e+01
-6.975000000000000000e+01
-6.925000000000000000e+01
-6.825000000000000000e+01
-7.175000000000000000e+01
-6.275000000000000000e+01
-7.175000000000000000e+01
-6.525000000000000000e+01
-7.375000000000000000e+01
-6.675000000000000000e+01
-6.725000000000000000e+01
-5.775000000000000000e+01
-5.725000000000000000e+01
-5.625000000000000000e+01
-5.575000000000000000e+01
-5.525000000000000000e+01
-5.425000000000000000e+01
-5.525000000000000000e+01
-5.475000000000000000e+01
-5.775000000000000000e+01
-5.725000000000000000e+01
-5.725000000000000000e+01
-7.225000000000000000e+01
-7.125000000000000000e+01
-7.075000000000000000e+01
-7.025000000000000000e+01
-6.925000000000000000e+01
-6.875000000000000000e+01
-6.825000000000000000e+01
-6.775000000000000000e+01
-6.725000000000000000e+01
-7.125000000000000000e+01
-7.075000000000000000e+01
-7.025000000000000000e+01
-6.925000000000000000e+01
-6.825000000000000000e+01
-6.775000000000000000e+01
-6.675000000000000000e+01
-7.425000000000000000e+01
-6.875000000000000000e+01
-6.825000000000000000e+01
-6.775000000000000000e+01
-6.725000000000000000e+01
-7.525000000000000000e+01
-7.475000000000000000e+01
-6.675000000000000000e+01
-6.675000000000000000e+01
-5.325000000000000000e+01
-5.575000000000000000e+01
-6.525000000000000000e+01
-5.775000000000000000e+01
-6.525000000000000000e+01
-6.475000000000000000e+01
-5.825000000000000000e+01
-5.625000000000000000e+01
-5.575000000000000000e+01
-5.675000000000000000e+01
-5.625000000000000000e+01
-5.475000000000000000e+01
-5.425000000000000000e+01
-5.725000000000000000e+01
-5.675000000000000000e+01
-1.212500000000000000e+02
-1.027500000000000000e+02
-1.087500000000000000e+02
-1.082500000000000000e+02
-1.107500000000000000e+02
-1.127500000000000000e+02
-1.122500000000000000e+02
-1.162500000000000000e+02
-1.147500000000000000e+02
-1.192500000000000000e+02
-1.187500000000000000e+02
-1.137500000000000000e+02
-1.132500000000000000e+02
-1.207500000000000000e+02
-1.197500000000000000e+02
-1.177500000000000000e+02
-1.172500000000000000e+02
-1.217500000000000000e+02
-1.197500000000000000e+02
-1.192500000000000000e+02
-1.227500000000000000e+02
-1.222500000000000000e+02
-1.217500000000000000e+02
-1.212500000000000000e+02
-1.237500000000000000e+02
-1.022500000000000000e+02
-1.077500000000000000e+02
-1.072500000000000000e+02
-1.122500000000000000e+02
-1.102500000000000000e+02
-1.207500000000000000e+02
-1.142500000000000000e+02
-1.132500000000000000e+02
-1.107500000000000000e+02
-1.202500000000000000e+02
-1.197500000000000000e+02
-1.182500000000000000e+02
-1.167500000000000000e+02
-1.152500000000000000e+02
-1.142500000000000000e+02
-1.127500000000000000e+02
-1.122500000000000000e+02
-1.107500000000000000e+02
-1.217500000000000000e+02
-1.207500000000000000e+02
-1.202500000000000000e+02
-1.182500000000000000e+02
-1.162500000000000000e+02
-1.157500000000000000e+02
-1.152500000000000000e+02
-1.147500000000000000e+02
-1.142500000000000000e+02
-1.117500000000000000e+02
-1.217500000000000000e+02
-1.212500000000000000e+02
-1.187500000000000000e+02
-1.182500000000000000e+02
-1.167500000000000000e+02
-1.227500000000000000e+02
-1.222500000000000000e+02
-1.207500000000000000e+02
-1.202500000000000000e+02
-1.177500000000000000e+02
-1.172500000000000000e+02
-1.167500000000000000e+02
-1.162500000000000000e+02
-1.222500000000000000e+02
-1.217500000000000000e+02
-1.207500000000000000e+02
-1.202500000000000000e+02
-1.182500000000000000e+02
