# Supplementary material for: Environmental Conditions for Alternative Tree Cover States in HighLatitudes
Source: Copernicus journal article supplement (doi:10.5194/bg-2016-401), 2016-10-11
Supplement: Supplementary file 4 [file bg-2016-401-supplement.zip › Analysis/files_to_load_and_import/commonstate_bor.txt]

1.000000000000000000e+00
1.000000000000000000e+00
1.000000000000000000e+00
1.000000000000000000e+00
1.000000000000000000e+00
1.000000000000000000e+00
1.000000000000000000e+00
1.000000000000000000e+00
1.000000000000000000e+00
1.000000000000000000e+00
1.000000000000000000e+00
1.000000000000000000e+00
1.000000000000000000e+00
1.000000000000000000e+00
1.000000000000000000e+00
1.000000000000000000e+00
1.000000000000000000e+00
1.000000000000000000e+00
1.000000000000000000e+00
1.000000000000000000e+00
1.000000000000000000e+00
1.000000000000000000e+00
1.000000000000000000e+00
1.000000000000000000e+00
3.000000000000000000e+00
3.000000000000000000e+00
3.000000000000000000e+00
3.000000000000000000e+00
3.000000000000000000e+00
3.000000000000000000e+00
3.000000000000000000e+00
3.000000000000000000e+00
3.000000000000000000e+00
3.000000000000000000e+00
3.000000000000000000e+00
3.000000000000000000e+00
3.000000000000000000e+00
3.000000000000000000e+00
3.000000000000000000e+00
3.000000000000000000e+00
3.000000000000000000e+00
3.000000000000000000e+00
3.000000000000000000e+00
3.000000000000000000e+00
3.000000000000000000e+00
3.000000000000000000e+00
3.000000000000000000e+00
3.000000000000000000e+00
3.000000000000000000e+00
3.000000000000000000e+00
3.000000000000000000e+00
3.000000000000000000e+00
3.000000000000000000e+00
4.000000000000000000e+00
4.000000000000000000e+00
4.000000000000000000e+00
4.000000000000000000e+00
4.000000000000000000e+00
4.000000000000000000e+00
4.000000000000000000e+00
4.000000000000000000e+00
4.000000000000000000e+00
4.000000000000000000e+00
4.000000000000000000e+00
1.000000000000000000e+00
1.000000000000000000e+00
1.000000000000000000e+00
1.000000000000000000e+00
1.000000000000000000e+00
1.000000000000000000e+00
1.000000000000000000e+00
1.000000000000000000e+00
1.000000000000000000e+00
1.000000000000000000e+00
1.000000000000000000e+00
1.000000000000000000e+00
1.000000000000000000e+00
1.000000000000000000e+00
1.000000000000000000e+00
1.000000000000000000e+00
1.000000000000000000e+00
1.000000000000000000e+00
1.000000000000000000e+00
1.000000000000000000e+00
1.000000000000000000e+00
1.000000000000000000e+00
1.000000000000000000e+00
1.000000000000000000e+00
1.000000000000000000e+00
1.000000000000000000e+00
1.000000000000000000e+00
1.000000000000000000e+00
1.000000000000000000e+00
1.000000000000000000e+00
1.000000000000000000e+00
1.000000000000000000e+00
1.000000000000000000e+00
1.000000000000000000e+00
1.000000000000000000e+00
1.000000000000000000e+00
1.000000000000000000e+00
1.000000000000000000e+00
1.000000000000000000e+00
1.000000000000000000e+00
1.000000000000000000e+00
1.000000000000000000e+00
1.000000000000000000e+00
1.000000000000000000e+00
1.000000000000000000e+00
1.000000000000000000e+00
1.000000000000000000e+00
1.000000000000000000e+00
1.000000000000000000e+00
1.000000000000000000e+00
1.000000000000000000e+00
1.000000000000000000e+00
1.000000000000000000e+00
1.000000000000000000e+00
1.000000000000000000e+00
1.000000000000000000e+00
1.000000000000000000e+00
1.000000000000000000e+00
1.000000000000000000e+00
1.000000000000000000e+00
1.000000000000000000e+00
1.000000000000000000e+00
3.000000000000000000e+00
3.000000000000000000e+00
3.000000000000000000e+00
3.000000000000000000e+00
3.000000000000000000e+00
3.000000000000000000e+00
3.000000000000000000e+00
3.000000000000000000e+00
3.000000000000000000e+00
3.000000000000000000e+00
3.000000000000000000e+00
3.000000000000000000e+00
3.000000000000000000e+00
3.000000000000000000e+00
3.000000000000000000e+00
3.000000000000000000e+00
3.000000000000000000e+00
3.000000000000000000e+00
3.000000000000000000e+00
3.000000000000000000e+00
3.000000000000000000e+00
3.000000000000000000e+00
3.000000000000000000e+00
3.000000000000000000e+00
3.000000000000000000e+00
3.000000000000000000e+00
3.000000000000000000e+00
3.000000000000000000e+00
4.000000000000000000e+00
4.000000000000000000e+00
4.000000000000000000e+00
4.000000000000000000e+00
4.000000000000000000e+00
4.000000000000000000e+00
4.000000000000000000e+00
4.000000000000000000e+00
4.000000000000000000e+00
4.000000000000000000e+00
4.000000000000000000e+00
3.000000000000000000e+00
3.000000000000000000e+00
3.000000000000000000e+00
3.000000000000000000e+00
3.000000000000000000e+00
3.000000000000000000e+00
3.000000000000000000e+00
3.000000000000000000e+00
3.000000000000000000e+00
3.000000000000000000e+00
3.000000000000000000e+00
3.000000000000000000e+00
3.000000000000000000e+00
3.000000000000000000e+00
3.000000000000000000e+00
3.000000000000000000e+00
3.000000000000000000e+00
3.000000000000000000e+00
3.000000000000000000e+00
3.000000000000000000e+00
3.000000000000000000e+00
3.000000000000000000e+00
3.000000000000000000e+00
3.000000000000000000e+00
3.000000000000000000e+00
3.000000000000000000e+00
3.000000000000000000e+00
3.000000000000000000e+00
4.000000000000000000e+00
4.000000000000000000e+00
4.000000000000000000e+00
4.000000000000000000e+00
4.000000000000000000e+00
4.000000000000000000e+00
4.000000000000000000e+00
4.000000000000000000e+00
4.000000000000000000e+00
4.000000000000000000e+00
4.000000000000000000e+00
4.000000000000000000e+00
4.000000000000000000e+00
4.000000000000000000e+00
4.000000000000000000e+00
4.000000000000000000e+00
4.000000000000000000e+00
4.000000000000000000e+00
4.000000000000000000e+00
4.000000000000000000e+00
4.000000000000000000e+00
4.000000000000000000e+00
4.000000000000000000e+00
4.000000000000000000e+00
4.000000000000000000e+00
1.000000000000000000e+00
1.000000000000000000e+00
1.000000000000000000e+00
1.000000000000000000e+00
1.000000000000000000e+00
1.000000000000000000e+00
1.000000000000000000e+00
1.000000000000000000e+00
1.000000000000000000e+00
1.000000000000000000e+00
1.000000000000000000e+00
1.000000000000000000e+00
1.000000000000000000e+00
1.000000000000000000e+00
1.000000000000000000e+00
1.000000000000000000e+00
1.000000000000000000e+00
1.000000000000000000e+00
1.000000000000000000e+00
1.000000000000000000e+00
1.000000000000000000e+00
1.000000000000000000e+00
1.000000000000000000e+00
1.000000000000000000e+00
1.000000000000000000e+00
1.000000000000000000e+00
1.000000000000000000e+00
1.000000000000000000e+00
1.000000000000000000e+00
1.000000000000000000e+00
1.000000000000000000e+00
1.000000000000000000e+00
1.000000000000000000e+00
3.000000000000000000e+00
3.000000000000000000e+00
3.000000000000000000e+00
3.000000000000000000e+00
3.000000000000000000e+00
3.000000000000000000e+00
3.000000000000000000e+00
3.000000000000000000e+00
3.000000000000000000e+00
3.000000000000000000e+00
3.000000000000000000e+00
3.000000000000000000e+00
3.000000000000000000e+00
3.000000000000000000e+00
3.000000000000000000e+00
3.000000000000000000e+00
3.000000000000000000e+00
3.000000000000000000e+00
3.000000000000000000e+00
3.000000000000000000e+00
3.000000000000000000e+00
3.000000000000000000e+00
4.000000000000000000e+00
4.000000000000000000e+00
4.000000000000000000e+00
4.000000000000000000e+00
4.000000000000000000e+00
4.000000000000000000e+00
4.000000000000000000e+00
4.000000000000000000e+00
4.000000000000000000e+00
4.000000000000000000e+00
4.000000000000000000e+00
4.000000000000000000e+00
4.000000000000000000e+00
4.000000000000000000e+00
4.000000000000000000e+00
4.000000000000000000e+00
4.000000000000000000e+00
4.000000000000000000e+00
4.000000000000000000e+00
4.000000000000000000e+00
4.000000000000000000e+00
4.000000000000000000e+00
4.000000000000000000e+00
4.000000000000000000e+00
4.000000000000000000e+00
4.000000000000000000e+00
4.000000000000000000e+00
4.000000000000000000e+00
4.000000000000000000e+00
4.000000000000000000e+00
4.000000000000000000e+00
4.000000000000000000e+00
4.000000000000000000e+00
4.000000000000000000e+00
4.000000000000000000e+00
4.000000000000000000e+00
4.000000000000000000e+00
1.000000000000000000e+00
1.000000000000000000e+00
1.000000000000000000e+00
1.000000000000000000e+00
1.000000000000000000e+00
1.000000000000000000e+00
1.000000000000000000e+00
1.000000000000000000e+00
1.000000000000000000e+00
1.000000000000000000e+00
1.000000000000000000e+00
1.000000000000000000e+00
1.000000000000000000e+00
1.000000000000000000e+00
1.000000000000000000e+00
1.000000000000000000e+00
1.000000000000000000e+00
1.000000000000000000e+00
1.000000000000000000e+00
1.000000000000000000e+00
1.000000000000000000e+00
1.000000000000000000e+00
1.000000000000000000e+00
1.000000000000000000e+00
1.000000000000000000e+00
3.000000000000000000e+00
3.000000000000000000e+00
3.000000000000000000e+00
3.000000000000000000e+00
3.000000000000000000e+00
3.000000000000000000e+00
3.000000000000000000e+00
3.000000000000000000e+00
3.000000000000000000e+00
3.000000000000000000e+00
3.000000000000000000e+00
3.000000000000000000e+00
3.000000000000000000e+00
3.000000000000000000e+00
3.000000000000000000e+00
3.000000000000000000e+00
3.000000000000000000e+00
3.000000000000000000e+00
3.000000000000000000e+00
3.000000000000000000e+00
3.000000000000000000e+00
3.000000000000000000e+00
3.000000000000000000e+00
3.000000000000000000e+00
3.000000000000000000e+00
3.000000000000000000e+00
3.000000000000000000e+00
3.000000000000000000e+00
3.000000000000000000e+00
3.000000000000000000e+00
3.000000000000000000e+00
3.000000000000000000e+00
3.000000000000000000e+00
3.000000000000000000e+00
3.000000000000000000e+00
3.000000000000000000e+00
3.000000000000000000e+00
4.000000000000000000e+00
4.000000000000000000e+00
4.000000000000000000e+00
4.000000000000000000e+00
4.000000000000000000e+00
4.000000000000000000e+00
4.000000000000000000e+00
4.000000000000000000e+00
4.000000000000000000e+00
4.000000000000000000e+00
4.000000000000000000e+00
4.000000000000000000e+00
4.000000000000000000e+00
4.000000000000000000e+00
4.000000000000000000e+00
4.000000000000000000e+00
4.000000000000000000e+00
4.000000000000000000e+00
4.000000000000000000e+00
4.000000000000000000e+00
4.000000000000000000e+00
4.000000000000000000e+00
4.000000000000000000e+00
4.000000000000000000e+00
4.000000000000000000e+00
4.000000000000000000e+00
4.000000000000000000e+00
4.000000000000000000e+00
4.000000000000000000e+00
4.000000000000000000e+00
4.000000000000000000e+00
4.000000000000000000e+00
4.000000000000000000e+00
4.000000000000000000e+00
4.000000000000000000e+00
4.000000000000000000e+00
4.000000000000000000e+00
4.000000000000000000e+00
4.000000000000000000e+00
4.000000000000000000e+00
3.000000000000000000e+00
3.000000000000000000e+00
3.000000000000000000e+00
3.000000000000000000e+00
3.000000000000000000e+00
3.000000000000000000e+00
3.000000000000000000e+00
3.000000000000000000e+00
3.000000000000000000e+00
3.000000000000000000e+00
3.000000000000000000e+00
3.000000000000000000e+00
3.000000000000000000e+00
3.000000000000000000e+00
3.000000000000000000e+00
3.000000000000000000e+00
3.000000000000000000e+00
3.000000000000000000e+00
3.000000000000000000e+00
3.000000000000000000e+00
3.000000000000000000e+00
3.000000000000000000e+00
3.000000000000000000e+00
3.000000000000000000e+00
4.000000000000000000e+00
4.000000000000000000e+00
4.000000000000000000e+00
4.000000000000000000e+00
4.000000000000000000e+00
4.000000000000000000e+00
4.000000000000000000e+00
4.000000000000000000e+00
4.000000000000000000e+00
4.000000000000000000e+00
4.000000000000000000e+00
4.000000000000000000e+00
4.000000000000000000e+00
4.000000000000000000e+00
4.000000000000000000e+00
4.000000000000000000e+00
4.000000000000000000e+00
4.000000000000000000e+00
4.000000000000000000e+00
4.000000000000000000e+00
4.000000000000000000e+00
4.000000000000000000e+00
4.000000000000000000e+00
4.000000000000000000e+00
4.000000000000000000e+00
4.000000000000000000e+00
4.000000000000000000e+00
4.000000000000000000e+00
4.000000000000000000e+00
4.000000000000000000e+00
4.000000000000000000e+00
4.000000000000000000e+00
4.000000000000000000e+00
4.000000000000000000e+00
4.000000000000000000e+00
4.000000000000000000e+00
4.000000000000000000e+00
4.000000000000000000e+00
4.000000000000000000e+00
4.000000000000000000e+00
4.000000000000000000e+00
4.000000000000000000e+00
4.000000000000000000e+00
4.000000000000000000e+00
4.000000000000000000e+00
4.000000000000000000e+00
4.000000000000000000e+00
