# Supplementary material for: Environmental Conditions for Alternative Tree Cover States in HighLatitudes
Source: Copernicus journal article supplement (doi:10.5194/bg-2016-401), 2016-10-11
Supplement: Supplementary file 4 [file bg-2016-401-supplement.zip › Analysis/files_to_load_and_import/datasets_after_classification/canadian_wildfires_1980-2014.csv]

	LAT	LON	SUM	AVG
1	45.25	-69.75	0	0
2	45.25	-70.25	0	0
3	45.25	-70.75	0	0
4	45.25	-71.25	0	0
5	45.25	-71.75	0	0
6	45.25	-72.25	0	0
7	45.25	-72.75	0	0
8	45.25	-73.25	0	0
9	45.25	-73.75	0	0
10	45.25	-74.25	1	0.0285714285714286
11	45.25	-74.75	0	0
12	45.25	-75.25	0	0
13	45.25	-75.75	0	0
14	45.25	-76.25	0	0
15	45.25	-76.75	0	0
16	45.25	-77.25	0	0
17	45.25	-77.75	0	0
18	45.25	-78.25	0	0
19	45.25	-78.75	0	0
20	45.25	-79.25	0	0
21	45.25	-79.75	0	0
22	45.25	-80.25	0	0
23	45.25	-80.75	0	0
24	45.25	-81.25	0	0
25	45.25	-81.75	0	0
26	45.25	-82.25	0	0
27	45.25	-82.75	0	0
28	45.25	-83.25	0	0
29	45.25	-83.75	0	0
30	45.25	-84.25	0	0
31	45.25	-84.75	0	0
32	45.25	-85.25	0	0
33	45.25	-85.75	0	0
34	45.25	-86.25	0	0
35	45.25	-86.75	0	0
36	45.25	-87.25	0	0
37	45.25	-87.75	0	0
38	45.25	-88.25	0	0
39	45.25	-88.75	0	0
40	45.25	-89.25	0	0
41	45.25	-89.75	0	0
42	45.25	-90.25	0	0
43	45.25	-90.75	0	0
44	45.25	-91.25	0	0
45	45.25	-91.75	0	0
46	45.25	-92.25	0	0
47	45.25	-92.75	0	0
48	45.25	-93.25	0	0
49	45.25	-93.75	0	0
50	45.25	-94.25	0	0
51	45.25	-94.75	0	0
52	45.25	-95.25	0	0
53	45.25	-95.75	0	0
54	45.25	-96.25	0	0
55	45.25	-96.75	0	0
56	45.25	-97.25	0	0
57	45.25	-97.75	0	0
58	45.25	-98.25	0	0
59	45.25	-98.75	0	0
60	45.25	-99.25	0	0
61	45.25	-99.75	0	0
62	45.25	-100.25	0	0
63	45.25	-100.75	0	0
64	45.25	-101.25	0	0
65	45.25	-101.75	0	0
66	45.25	-102.25	0	0
67	45.25	-102.75	0	0
68	45.25	-103.25	0	0
69	45.25	-103.75	0	0
70	45.25	-104.25	0	0
71	45.25	-104.75	0	0
72	45.25	-105.25	0	0
73	45.25	-105.75	0	0
74	45.25	-106.25	0	0
75	45.25	-106.75	0	0
76	45.25	-107.25	0	0
77	45.25	-107.75	0	0
78	45.25	-108.25	0	0
79	45.25	-108.75	0	0
80	45.25	-109.25	0	0
81	45.25	-109.75	0	0
82	45.25	-110.25	0	0
83	45.25	-110.75	0	0
84	45.25	-111.25	0	0
85	45.25	-111.75	0	0
86	45.25	-112.25	0	0
87	45.25	-112.75	0	0
88	45.25	-113.25	0	0
89	45.25	-113.75	0	0
90	45.25	-114.25	0	0
91	45.25	-114.75	0	0
92	45.25	-115.25	0	0
93	45.25	-115.75	0	0
94	45.25	-116.25	0	0
95	45.25	-116.75	0	0
96	45.25	-117.25	0	0
97	45.25	-117.75	0	0
98	45.25	-118.25	0	0
99	45.25	-118.75	0	0
100	45.25	-119.25	0	0
101	45.25	-119.75	0	0
102	45.25	-120.25	0	0
103	45.25	-120.75	0	0
104	45.25	-121.25	0	0
105	45.25	-121.75	0	0
106	45.25	-122.25	0	0
107	45.25	-122.75	0	0
108	45.25	-123.25	0	0
109	45.25	-123.75	0	0
110	45.25	-124.25	0	0
111	45.25	-124.75	0	0
112	45.25	-125.25	0	0
113	45.25	-125.75	0	0
114	45.25	-126.25	0	0
115	45.25	-126.75	0	0
116	45.25	-127.25	0	0
117	45.25	-127.75	0	0
118	45.25	-128.25	0	0
119	45.25	-128.75	0	0
120	45.25	-129.25	0	0
121	45.25	-129.75	0	0
122	45.25	-130.25	0	0
123	45.25	-130.75	0	0
124	45.25	-131.25	0	0
125	45.25	-131.75	0	0
126	45.25	-132.25	0	0
127	45.25	-132.75	0	0
128	45.25	-133.25	0	0
129	45.25	-133.75	0	0
130	45.25	-134.25	0	0
131	45.25	-134.75	0	0
132	45.25	-135.25	0	0
133	45.25	-135.75	0	0
134	45.25	-136.25	0	0
135	45.25	-136.75	0	0
136	45.25	-137.25	0	0
137	45.25	-137.75	0	0
138	45.25	-138.25	0	0
139	45.25	-138.75	0	0
140	45.25	-139.25	0	0
141	45.25	-139.75	0	0
142	45.25	-140.25	0	0
143	45.25	-140.75	0	0
144	45.25	-141.25	0	0
145	45.75	-69.75	0	0
146	45.75	-70.25	0	0
147	45.75	-70.75	0	0
148	45.75	-71.25	0	0
149	45.75	-71.75	0	0
150	45.75	-72.25	0	0
151	45.75	-72.75	0	0
152	45.75	-73.25	0	0
153	45.75	-73.75	0	0
154	45.75	-74.25	0	0
155	45.75	-74.75	0	0
156	45.75	-75.25	0	0
157	45.75	-75.75	0	0
158	45.75	-76.25	0	0
159	45.75	-76.75	0	0
160	45.75	-77.25	0	0
161	45.75	-77.75	0	0
162	45.75	-78.25	0	0
163	45.75	-78.75	0	0
164	45.75	-79.25	0	0
165	45.75	-79.75	0	0
166	45.75	-80.25	0	0
167	45.75	-80.75	0	0
168	45.75	-81.25	0	0
169	45.75	-81.75	0	0
170	45.75	-82.25	0	0
171	45.75	-82.75	0	0
172	45.75	-83.25	0	0
173	45.75	-83.75	0	0
174	45.75	-84.25	0	0
175	45.75	-84.75	0	0
176	45.75	-85.25	0	0
177	45.75	-85.75	0	0
178	45.75	-86.25	0	0
179	45.75	-86.75	0	0
180	45.75	-87.25	0	0
181	45.75	-87.75	0	0
182	45.75	-88.25	0	0
183	45.75	-88.75	0	0
184	45.75	-89.25	0	0
185	45.75	-89.75	0	0
186	45.75	-90.25	0	0
187	45.75	-90.75	0	0
188	45.75	-91.25	0	0
189	45.75	-91.75	0	0
190	45.75	-92.25	0	0
191	45.75	-92.75	0	0
192	45.75	-93.25	0	0
193	45.75	-93.75	0	0
194	45.75	-94.25	0	0
195	45.75	-94.75	0	0
196	45.75	-95.25	0	0
197	45.75	-95.75	0	0
198	45.75	-96.25	0	0
199	45.75	-96.75	0	0
200	45.75	-97.25	0	0
201	45.75	-97.75	0	0
202	45.75	-98.25	0	0
203	45.75	-98.75	0	0
204	45.75	-99.25	0	0
205	45.75	-99.75	0	0
206	45.75	-100.25	0	0
207	45.75	-100.75	0	0
208	45.75	-101.25	0	0
209	45.75	-101.75	0	0
210	45.75	-102.25	0	0
211	45.75	-102.75	0	0
212	45.75	-103.25	0	0
213	45.75	-103.75	0	0
214	45.75	-104.25	0	0
215	45.75	-104.75	0	0
216	45.75	-105.25	0	0
217	45.75	-105.75	0	0
218	45.75	-106.25	0	0
219	45.75	-106.75	0	0
220	45.75	-107.25	0	0
221	45.75	-107.75	0	0
222	45.75	-108.25	0	0
223	45.75	-108.75	0	0
224	45.75	-109.25	0	0
225	45.75	-109.75	0	0
226	45.75	-110.25	0	0
227	45.75	-110.75	0	0
228	45.75	-111.25	0	0
229	45.75	-111.75	0	0
230	45.75	-112.25	0	0
231	45.75	-112.75	0	0
232	45.75	-113.25	0	0
233	45.75	-113.75	0	0
234	45.75	-114.25	0	0
235	45.75	-114.75	0	0
236	45.75	-115.25	0	0
237	45.75	-115.75	0	0
238	45.75	-116.25	0	0
239	45.75	-116.75	0	0
240	45.75	-117.25	0	0
241	45.75	-117.75	0	0
242	45.75	-118.25	0	0
243	45.75	-118.75	0	0
244	45.75	-119.25	0	0
245	45.75	-119.75	0	0
246	45.75	-120.25	0	0
247	45.75	-120.75	0	0
248	45.75	-121.25	0	0
249	45.75	-121.75	0	0
250	45.75	-122.25	0	0
251	45.75	-122.75	0	0
252	45.75	-123.25	0	0
253	45.75	-123.75	0	0
254	45.75	-124.25	0	0
255	45.75	-124.75	0	0
256	45.75	-125.25	0	0
257	45.75	-125.75	0	0
258	45.75	-126.25	0	0
259	45.75	-126.75	0	0
260	45.75	-127.25	0	0
261	45.75	-127.75	0	0
262	45.75	-128.25	0	0
263	45.75	-128.75	0	0
264	45.75	-129.25	0	0
265	45.75	-129.75	0	0
266	45.75	-130.25	0	0
267	45.75	-130.75	0	0
268	45.75	-131.25	0	0
269	45.75	-131.75	0	0
270	45.75	-132.25	0	0
271	45.75	-132.75	0	0
272	45.75	-133.25	0	0
273	45.75	-133.75	0	0
274	45.75	-134.25	0	0
275	45.75	-134.75	0	0
276	45.75	-135.25	0	0
277	45.75	-135.75	0	0
278	45.75	-136.25	0	0
279	45.75	-136.75	0	0
280	45.75	-137.25	0	0
281	45.75	-137.75	0	0
282	45.75	-138.25	0	0
283	45.75	-138.75	0	0
284	45.75	-139.25	0	0
285	45.75	-139.75	0	0
286	45.75	-140.25	0	0
287	45.75	-140.75	0	0
288	45.75	-141.25	0	0
289	46.25	-69.75	0	0
290	46.25	-70.25	0	0
291	46.25	-70.75	0	0
292	46.25	-71.25	0	0
293	46.25	-71.75	0	0
294	46.25	-72.25	0	0
295	46.25	-72.75	0	0
296	46.25	-73.25	0	0
297	46.25	-73.75	0	0
298	46.25	-74.25	0	0
299	46.25	-74.75	0	0
300	46.25	-75.25	0	0
301	46.25	-75.75	0	0
302	46.25	-76.25	0	0
303	46.25	-76.75	0	0
304	46.25	-77.25	0	0
305	46.25	-77.75	7	0.2
306	46.25	-78.25	0	0
307	46.25	-78.75	0	0
308	46.25	-79.25	0	0
309	46.25	-79.75	0	0
310	46.25	-80.25	0	0
311	46.25	-80.75	0	0
312	46.25	-81.25	0	0
313	46.25	-81.75	0	0
314	46.25	-82.25	0	0
315	46.25	-82.75	0	0
316	46.25	-83.25	0	0
317	46.25	-83.75	0	0
318	46.25	-84.25	0	0
319	46.25	-84.75	0	0
320	46.25	-85.25	0	0
321	46.25	-85.75	0	0
322	46.25	-86.25	0	0
323	46.25	-86.75	0	0
324	46.25	-87.25	0	0
325	46.25	-87.75	0	0
326	46.25	-88.25	0	0
327	46.25	-88.75	0	0
328	46.25	-89.25	0	0
329	46.25	-89.75	0	0
330	46.25	-90.25	0	0
331	46.25	-90.75	0	0
332	46.25	-91.25	0	0
333	46.25	-91.75	0	0
334	46.25	-92.25	0	0
335	46.25	-92.75	0	0
336	46.25	-93.25	0	0
337	46.25	-93.75	0	0
338	46.25	-94.25	0	0
339	46.25	-94.75	0	0
340	46.25	-95.25	0	0
341	46.25	-95.75	0	0
342	46.25	-96.25	0	0
343	46.25	-96.75	0	0
344	46.25	-97.25	0	0
345	46.25	-97.75	0	0
346	46.25	-98.25	0	0
347	46.25	-98.75	0	0
348	46.25	-99.25	0	0
349	46.25	-99.75	0	0
350	46.25	-100.25	0	0
351	46.25	-100.75	0	0
352	46.25	-101.25	0	0
353	46.25	-101.75	0	0
354	46.25	-102.25	0	0
355	46.25	-102.75	0	0
356	46.25	-103.25	0	0
357	46.25	-103.75	0	0
358	46.25	-104.25	0	0
359	46.25	-104.75	0	0
360	46.25	-105.25	0	0
361	46.25	-105.75	0	0
362	46.25	-106.25	0	0
363	46.25	-106.75	0	0
364	46.25	-107.25	0	0
365	46.25	-107.75	0	0
366	46.25	-108.25	0	0
367	46.25	-108.75	0	0
368	46.25	-109.25	0	0
369	46.25	-109.75	0	0
370	46.25	-110.25	0	0
371	46.25	-110.75	0	0
372	46.25	-111.25	0	0
373	46.25	-111.75	0	0
374	46.25	-112.25	0	0
375	46.25	-112.75	0	0
376	46.25	-113.25	0	0
377	46.25	-113.75	0	0
378	46.25	-114.25	0	0
379	46.25	-114.75	0	0
380	46.25	-115.25	0	0
381	46.25	-115.75	0	0
382	46.25	-116.25	0	0
383	46.25	-116.75	0	0
384	46.25	-117.25	0	0
385	46.25	-117.75	0	0
386	46.25	-118.25	0	0
387	46.25	-118.75	0	0
388	46.25	-119.25	0	0
389	46.25	-119.75	0	0
390	46.25	-120.25	0	0
391	46.25	-120.75	0	0
392	46.25	-121.25	0	0
393	46.25	-121.75	0	0
394	46.25	-122.25	0	0
395	46.25	-122.75	0	0
396	46.25	-123.25	0	0
397	46.25	-123.75	0	0
398	46.25	-124.25	0	0
399	46.25	-124.75	0	0
400	46.25	-125.25	0	0
401	46.25	-125.75	0	0
402	46.25	-126.25	0	0
403	46.25	-126.75	0	0
404	46.25	-127.25	0	0
405	46.25	-127.75	0	0
406	46.25	-128.25	0	0
407	46.25	-128.75	0	0
408	46.25	-129.25	0	0
409	46.25	-129.75	0	0
410	46.25	-130.25	0	0
411	46.25	-130.75	0	0
412	46.25	-131.25	0	0
413	46.25	-131.75	0	0
414	46.25	-132.25	0	0
415	46.25	-132.75	0	0
416	46.25	-133.25	0	0
417	46.25	-133.75	0	0
418	46.25	-134.25	0	0
419	46.25	-134.75	0	0
420	46.25	-135.25	0	0
421	46.25	-135.75	0	0
422	46.25	-136.25	0	0
423	46.25	-136.75	0	0
424	46.25	-137.25	0	0
425	46.25	-137.75	0	0
426	46.25	-138.25	0	0
427	46.25	-138.75	0	0
428	46.25	-139.25	0	0
429	46.25	-139.75	0	0
430	46.25	-140.25	0	0
431	46.25	-140.75	0	0
432	46.25	-141.25	0	0
433	46.75	-69.75	0	0
434	46.75	-70.25	0	0
435	46.75	-70.75	0	0
436	46.75	-71.25	0	0
437	46.75	-71.75	0	0
438	46.75	-72.25	0	0
439	46.75	-72.75	0	0
440	46.75	-73.25	0	0
441	46.75	-73.75	0	0
442	46.75	-74.25	0	0
443	46.75	-74.75	0	0
444	46.75	-75.25	0	0
445	46.75	-75.75	0	0
446	46.75	-76.25	0	0
447	46.75	-76.75	0	0
448	46.75	-77.25	0	0
449	46.75	-77.75	0	0
450	46.75	-78.25	0	0
451	46.75	-78.75	0	0
452	46.75	-79.25	1	0.0285714285714286
453	46.75	-79.75	1	0.0285714285714286
454	46.75	-80.25	0	0
455	46.75	-80.75	0	0
456	46.75	-81.25	0	0
457	46.75	-81.75	0	0
458	46.75	-82.25	0	0
459	46.75	-82.75	0	0
460	46.75	-83.25	0	0
461	46.75	-83.75	0	0
462	46.75	-84.25	0	0
463	46.75	-84.75	0	0
464	46.75	-85.25	0	0
465	46.75	-85.75	0	0
466	46.75	-86.25	0	0
467	46.75	-86.75	0	0
468	46.75	-87.25	0	0
469	46.75	-87.75	0	0
470	46.75	-88.25	0	0
471	46.75	-88.75	0	0
472	46.75	-89.25	0	0
473	46.75	-89.75	0	0
474	46.75	-90.25	0	0
475	46.75	-90.75	0	0
476	46.75	-91.25	0	0
477	46.75	-91.75	0	0
478	46.75	-92.25	0	0
479	46.75	-92.75	0	0
480	46.75	-93.25	0	0
481	46.75	-93.75	0	0
482	46.75	-94.25	0	0
483	46.75	-94.75	0	0
484	46.75	-95.25	0	0
485	46.75	-95.75	0	0
486	46.75	-96.25	0	0
487	46.75	-96.75	0	0
488	46.75	-97.25	0	0
489	46.75	-97.75	0	0
490	46.75	-98.25	0	0
491	46.75	-98.75	0	0
492	46.75	-99.25	0	0
493	46.75	-99.75	0	0
494	46.75	-100.25	0	0
495	46.75	-100.75	0	0
496	46.75	-101.25	0	0
497	46.75	-101.75	0	0
498	46.75	-102.25	0	0
499	46.75	-102.75	0	0
500	46.75	-103.25	0	0
501	46.75	-103.75	0	0
502	46.75	-104.25	0	0
503	46.75	-104.75	0	0
504	46.75	-105.25	0	0
505	46.75	-105.75	0	0
506	46.75	-106.25	0	0
507	46.75	-106.75	0	0
508	46.75	-107.25	0	0
509	46.75	-107.75	0	0
510	46.75	-108.25	0	0
511	46.75	-108.75	0	0
512	46.75	-109.25	0	0
513	46.75	-109.75	0	0
514	46.75	-110.25	0	0
515	46.75	-110.75	0	0
516	46.75	-111.25	0	0
517	46.75	-111.75	0	0
518	46.75	-112.25	0	0
519	46.75	-112.75	0	0
520	46.75	-113.25	0	0
521	46.75	-113.75	0	0
522	46.75	-114.25	0	0
523	46.75	-114.75	0	0
524	46.75	-115.25	0	0
525	46.75	-115.75	0	0
526	46.75	-116.25	0	0
527	46.75	-116.75	0	0
528	46.75	-117.25	0	0
529	46.75	-117.75	0	0
530	46.75	-118.25	0	0
531	46.75	-118.75	0	0
532	46.75	-119.25	0	0
533	46.75	-119.75	0	0
534	46.75	-120.25	0	0
535	46.75	-120.75	0	0
536	46.75	-121.25	0	0
537	46.75	-121.75	0	0
538	46.75	-122.25	0	0
539	46.75	-122.75	0	0
540	46.75	-123.25	0	0
541	46.75	-123.75	0	0
542	46.75	-124.25	0	0
543	46.75	-124.75	0	0
544	46.75	-125.25	0	0
545	46.75	-125.75	0	0
546	46.75	-126.25	0	0
547	46.75	-126.75	0	0
548	46.75	-127.25	0	0
549	46.75	-127.75	0	0
550	46.75	-128.25	0	0
551	46.75	-128.75	0	0
552	46.75	-129.25	0	0
553	46.75	-129.75	0	0
554	46.75	-130.25	0	0
555	46.75	-130.75	0	0
556	46.75	-131.25	0	0
557	46.75	-131.75	0	0
558	46.75	-132.25	0	0
559	46.75	-132.75	0	0
560	46.75	-133.25	0	0
561	46.75	-133.75	0	0
562	46.75	-134.25	0	0
563	46.75	-134.75	0	0
564	46.75	-135.25	0	0
565	46.75	-135.75	0	0
566	46.75	-136.25	0	0
567	46.75	-136.75	0	0
568	46.75	-137.25	0	0
569	46.75	-137.75	0	0
570	46.75	-138.25	0	0
571	46.75	-138.75	0	0
572	46.75	-139.25	0	0
573	46.75	-139.75	0	0
574	46.75	-140.25	0	0
575	46.75	-140.75	0	0
576	46.75	-141.25	0	0
577	47.25	-69.75	0	0
578	47.25	-70.25	0	0
579	47.25	-70.75	0	0
580	47.25	-71.25	0	0
581	47.25	-71.75	0	0
582	47.25	-72.25	0	0
583	47.25	-72.75	0	0
584	47.25	-73.25	2	0.0571428571428571
585	47.25	-73.75	2	0.0571428571428571
586	47.25	-74.25	0	0
587	47.25	-74.75	0	0
588	47.25	-75.25	0	0
589	47.25	-75.75	0	0
590	47.25	-76.25	1	0.0285714285714286
591	47.25	-76.75	0	0
592	47.25	-77.25	0	0
593	47.25	-77.75	0	0
594	47.25	-78.25	1	0.0285714285714286
595	47.25	-78.75	0	0
596	47.25	-79.25	0	0
597	47.25	-79.75	0	0
598	47.25	-80.25	0	0
599	47.25	-80.75	1	0.0285714285714286
600	47.25	-81.25	2	0.0571428571428571
601	47.25	-81.75	3	0.0857142857142857
602	47.25	-82.25	0	0
603	47.25	-82.75	2	0.0571428571428571
604	47.25	-83.25	0	0
605	47.25	-83.75	1	0.0285714285714286
606	47.25	-84.25	0	0
607	47.25	-84.75	0	0
608	47.25	-85.25	0	0
609	47.25	-85.75	0	0
610	47.25	-86.25	0	0
611	47.25	-86.75	0	0
612	47.25	-87.25	0	0
613	47.25	-87.75	0	0
614	47.25	-88.25	0	0
615	47.25	-88.75	0	0
616	47.25	-89.25	0	0
617	47.25	-89.75	0	0
618	47.25	-90.25	0	0
619	47.25	-90.75	0	0
620	47.25	-91.25	0	0
621	47.25	-91.75	0	0
622	47.25	-92.25	0	0
623	47.25	-92.75	0	0
624	47.25	-93.25	0	0
625	47.25	-93.75	0	0
626	47.25	-94.25	0	0
627	47.25	-94.75	0	0
628	47.25	-95.25	0	0
629	47.25	-95.75	0	0
630	47.25	-96.25	0	0
631	47.25	-96.75	0	0
632	47.25	-97.25	0	0
633	47.25	-97.75	0	0
634	47.25	-98.25	0	0
635	47.25	-98.75	0	0
636	47.25	-99.25	0	0
637	47.25	-99.75	0	0
638	47.25	-100.25	0	0
639	47.25	-100.75	0	0
640	47.25	-101.25	0	0
641	47.25	-101.75	0	0
642	47.25	-102.25	0	0
643	47.25	-102.75	0	0
644	47.25	-103.25	0	0
645	47.25	-103.75	0	0
646	47.25	-104.25	0	0
647	47.25	-104.75	0	0
648	47.25	-105.25	0	0
649	47.25	-105.75	0	0
650	47.25	-106.25	0	0
651	47.25	-106.75	0	0
652	47.25	-107.25	0	0
653	47.25	-107.75	0	0
654	47.25	-108.25	0	0
655	47.25	-108.75	0	0
656	47.25	-109.25	0	0
657	47.25	-109.75	0	0
658	47.25	-110.25	0	0
659	47.25	-110.75	0	0
660	47.25	-111.25	0	0
661	47.25	-111.75	0	0
662	47.25	-112.25	0	0
663	47.25	-112.75	0	0
664	47.25	-113.25	0	0
665	47.25	-113.75	0	0
666	47.25	-114.25	0	0
667	47.25	-114.75	0	0
668	47.25	-115.25	0	0
669	47.25	-115.75	0	0
670	47.25	-116.25	0	0
671	47.25	-116.75	0	0
672	47.25	-117.25	0	0
673	47.25	-117.75	0	0
674	47.25	-118.25	0	0
675	47.25	-118.75	0	0
676	47.25	-119.25	0	0
677	47.25	-119.75	0	0
678	47.25	-120.25	0	0
679	47.25	-120.75	0	0
680	47.25	-121.25	0	0
681	47.25	-121.75	0	0
682	47.25	-122.25	0	0
683	47.25	-122.75	0	0
684	47.25	-123.25	0	0
685	47.25	-123.75	0	0
686	47.25	-124.25	0	0
687	47.25	-124.75	0	0
688	47.25	-125.25	0	0
689	47.25	-125.75	0	0
690	47.25	-126.25	0	0
691	47.25	-126.75	0	0
692	47.25	-127.25	0	0
693	47.25	-127.75	0	0
694	47.25	-128.25	0	0
695	47.25	-128.75	0	0
696	47.25	-129.25	0	0
697	47.25	-129.75	0	0
698	47.25	-130.25	0	0
699	47.25	-130.75	0	0
700	47.25	-131.25	0	0
701	47.25	-131.75	0	0
702	47.25	-132.25	0	0
703	47.25	-132.75	0	0
704	47.25	-133.25	0	0
705	47.25	-133.75	0	0
706	47.25	-134.25	0	0
707	47.25	-134.75	0	0
708	47.25	-135.25	0	0
709	47.25	-135.75	0	0
710	47.25	-136.25	0	0
711	47.25	-136.75	0	0
712	47.25	-137.25	0	0
713	47.25	-137.75	0	0
714	47.25	-138.25	0	0
715	47.25	-138.75	0	0
716	47.25	-139.25	0	0
717	47.25	-139.75	0	0
718	47.25	-140.25	0	0
719	47.25	-140.75	0	0
720	47.25	-141.25	0	0
721	47.75	-69.75	0	0
722	47.75	-70.25	0	0
723	47.75	-70.75	2	0.0571428571428571
724	47.75	-71.25	2	0.0571428571428571
725	47.75	-71.75	0	0
726	47.75	-72.25	1	0.0285714285714286
727	47.75	-72.75	0	0
728	47.75	-73.25	0	0
729	47.75	-73.75	0	0
730	47.75	-74.25	0	0
731	47.75	-74.75	0	0
732	47.75	-75.25	1	0.0285714285714286
733	47.75	-75.75	0	0
734	47.75	-76.25	1	0.0285714285714286
735	47.75	-76.75	1	0.0285714285714286
736	47.75	-77.25	0	0
737	47.75	-77.75	0	0
738	47.75	-78.25	0	0
739	47.75	-78.75	0	0
740	47.75	-79.25	0	0
741	47.75	-79.75	0	0
742	47.75	-80.25	0	0
743	47.75	-80.75	1	0.0285714285714286
744	47.75	-81.25	1	0.0285714285714286
745	47.75	-81.75	4	0.114285714285714
746	47.75	-82.25	0	0
747	47.75	-82.75	0	0
748	47.75	-83.25	2	0.0571428571428571
749	47.75	-83.75	1	0.0285714285714286
750	47.75	-84.25	2	0.0571428571428571
751	47.75	-84.75	0	0
752	47.75	-85.25	0	0
753	47.75	-85.75	0	0
754	47.75	-86.25	0	0
755	47.75	-86.75	0	0
756	47.75	-87.25	0	0
757	47.75	-87.75	0	0
758	47.75	-88.25	0	0
759	47.75	-88.75	0	0
760	47.75	-89.25	0	0
761	47.75	-89.75	0	0
762	47.75	-90.25	0	0
763	47.75	-90.75	0	0
764	47.75	-91.25	0	0
765	47.75	-91.75	0	0
766	47.75	-92.25	0	0
767	47.75	-92.75	0	0
768	47.75	-93.25	0	0
769	47.75	-93.75	0	0
770	47.75	-94.25	0	0
771	47.75	-94.75	0	0
772	47.75	-95.25	0	0
773	47.75	-95.75	0	0
774	47.75	-96.25	0	0
775	47.75	-96.75	0	0
776	47.75	-97.25	0	0
777	47.75	-97.75	0	0
778	47.75	-98.25	0	0
779	47.75	-98.75	0	0
780	47.75	-99.25	0	0
781	47.75	-99.75	0	0
782	47.75	-100.25	0	0
783	47.75	-100.75	0	0
784	47.75	-101.25	0	0
785	47.75	-101.75	0	0
786	47.75	-102.25	0	0
787	47.75	-102.75	0	0
788	47.75	-103.25	0	0
789	47.75	-103.75	0	0
790	47.75	-104.25	0	0
791	47.75	-104.75	0	0
792	47.75	-105.25	0	0
793	47.75	-105.75	0	0
794	47.75	-106.25	0	0
795	47.75	-106.75	0	0
796	47.75	-107.25	0	0
797	47.75	-107.75	0	0
798	47.75	-108.25	0	0
799	47.75	-108.75	0	0
800	47.75	-109.25	0	0
801	47.75	-109.75	0	0
802	47.75	-110.25	0	0
803	47.75	-110.75	0	0
804	47.75	-111.25	0	0
805	47.75	-111.75	0	0
806	47.75	-112.25	0	0
807	47.75	-112.75	0	0
808	47.75	-113.25	0	0
809	47.75	-113.75	0	0
810	47.75	-114.25	0	0
811	47.75	-114.75	0	0
812	47.75	-115.25	0	0
813	47.75	-115.75	0	0
814	47.75	-116.25	0	0
815	47.75	-116.75	0	0
816	47.75	-117.25	0	0
817	47.75	-117.75	0	0
818	47.75	-118.25	0	0
819	47.75	-118.75	0	0
820	47.75	-119.25	0	0
821	47.75	-119.75	0	0
822	47.75	-120.25	0	0
823	47.75	-120.75	0	0
824	47.75	-121.25	0	0
825	47.75	-121.75	0	0
826	47.75	-122.25	0	0
827	47.75	-122.75	0	0
828	47.75	-123.25	0	0
829	47.75	-123.75	0	0
830	47.75	-124.25	0	0
831	47.75	-124.75	0	0
832	47.75	-125.25	0	0
833	47.75	-125.75	0	0
834	47.75	-126.25	0	0
835	47.75	-126.75	0	0
836	47.75	-127.25	0	0
837	47.75	-127.75	0	0
838	47.75	-128.25	0	0
839	47.75	-128.75	0	0
840	47.75	-129.25	0	0
841	47.75	-129.75	0	0
842	47.75	-130.25	0	0
843	47.75	-130.75	0	0
844	47.75	-131.25	0	0
845	47.75	-131.75	0	0
846	47.75	-132.25	0	0
847	47.75	-132.75	0	0
848	47.75	-133.25	0	0
849	47.75	-133.75	0	0
850	47.75	-134.25	0	0
851	47.75	-134.75	0	0
852	47.75	-135.25	0	0
853	47.75	-135.75	0	0
854	47.75	-136.25	0	0
855	47.75	-136.75	0	0
856	47.75	-137.25	0	0
857	47.75	-137.75	0	0
858	47.75	-138.25	0	0
859	47.75	-138.75	0	0
860	47.75	-139.25	0	0
861	47.75	-139.75	0	0
862	47.75	-140.25	0	0
863	47.75	-140.75	0	0
864	47.75	-141.25	0	0
865	48.25	-69.75	0	0
866	48.25	-70.25	0	0
867	48.25	-70.75	1	0.0285714285714286
868	48.25	-71.25	1	0.0285714285714286
869	48.25	-71.75	2	0.0571428571428571
870	48.25	-72.25	2	0.0571428571428571
871	48.25	-72.75	0	0
872	48.25	-73.25	2	0.0571428571428571
873	48.25	-73.75	2	0.0571428571428571
874	48.25	-74.25	4	0.114285714285714
875	48.25	-74.75	1	0.0285714285714286
876	48.25	-75.25	1	0.0285714285714286
877	48.25	-75.75	0	0
878	48.25	-76.25	1	0.0285714285714286
879	48.25	-76.75	1	0.0285714285714286
880	48.25	-77.25	2	0.0571428571428571
881	48.25	-77.75	0	0
882	48.25	-78.25	1	0.0285714285714286
883	48.25	-78.75	5	0.142857142857143
884	48.25	-79.25	1	0.0285714285714286
885	48.25	-79.75	0	0
886	48.25	-80.25	1	0.0285714285714286
887	48.25	-80.75	1	0.0285714285714286
888	48.25	-81.25	0	0
889	48.25	-81.75	3	0.0857142857142857
890	48.25	-82.25	4	0.114285714285714
891	48.25	-82.75	2	0.0571428571428571
892	48.25	-83.25	4	0.114285714285714
893	48.25	-83.75	1	0.0285714285714286
894	48.25	-84.25	1	0.0285714285714286
895	48.25	-84.75	1	0.0285714285714286
896	48.25	-85.25	0	0
897	48.25	-85.75	0	0
898	48.25	-86.25	1	0.0285714285714286
899	48.25	-86.75	0	0
900	48.25	-87.25	0	0
901	48.25	-87.75	0	0
902	48.25	-88.25	0	0
903	48.25	-88.75	0	0
904	48.25	-89.25	1	0.0285714285714286
905	48.25	-89.75	0	0
906	48.25	-90.25	0	0
907	48.25	-90.75	0	0
908	48.25	-91.25	4	0.114285714285714
909	48.25	-91.75	3	0.0857142857142857
910	48.25	-92.25	0	0
911	48.25	-92.75	0	0
912	48.25	-93.25	0	0
913	48.25	-93.75	0	0
914	48.25	-94.25	0	0
915	48.25	-94.75	0	0
916	48.25	-95.25	0	0
917	48.25	-95.75	0	0
918	48.25	-96.25	0	0
919	48.25	-96.75	0	0
920	48.25	-97.25	0	0
921	48.25	-97.75	0	0
922	48.25	-98.25	0	0
923	48.25	-98.75	0	0
924	48.25	-99.25	0	0
925	48.25	-99.75	0	0
926	48.25	-100.25	0	0
927	48.25	-100.75	0	0
928	48.25	-101.25	0	0
929	48.25	-101.75	0	0
930	48.25	-102.25	0	0
931	48.25	-102.75	0	0
932	48.25	-103.25	0	0
933	48.25	-103.75	0	0
934	48.25	-104.25	0	0
935	48.25	-104.75	0	0
936	48.25	-105.25	0	0
937	48.25	-105.75	0	0
938	48.25	-106.25	0	0
939	48.25	-106.75	0	0
940	48.25	-107.25	0	0
941	48.25	-107.75	0	0
942	48.25	-108.25	0	0
943	48.25	-108.75	0	0
944	48.25	-109.25	0	0
945	48.25	-109.75	0	0
946	48.25	-110.25	0	0
947	48.25	-110.75	0	0
948	48.25	-111.25	0	0
949	48.25	-111.75	0	0
950	48.25	-112.25	0	0
951	48.25	-112.75	0	0
952	48.25	-113.25	0	0
953	48.25	-113.75	0	0
954	48.25	-114.25	0	0
955	48.25	-114.75	0	0
956	48.25	-115.25	0	0
957	48.25	-115.75	0	0
958	48.25	-116.25	0	0
959	48.25	-116.75	0	0
960	48.25	-117.25	0	0
961	48.25	-117.75	0	0
962	48.25	-118.25	0	0
963	48.25	-118.75	0	0
964	48.25	-119.25	0	0
965	48.25	-119.75	0	0
966	48.25	-120.25	0	0
967	48.25	-120.75	0	0
968	48.25	-121.25	0	0
969	48.25	-121.75	0	0
970	48.25	-122.25	0	0
971	48.25	-122.75	1	0.0285714285714286
972	48.25	-123.25	0	0
973	48.25	-123.75	0	0
974	48.25	-124.25	0	0
975	48.25	-124.75	0	0
976	48.25	-125.25	0	0
977	48.25	-125.75	0	0
978	48.25	-126.25	0	0
979	48.25	-126.75	0	0
980	48.25	-127.25	0	0
981	48.25	-127.75	0	0
982	48.25	-128.25	0	0
983	48.25	-128.75	0	0
984	48.25	-129.25	0	0
985	48.25	-129.75	0	0
986	48.25	-130.25	0	0
987	48.25	-130.75	0	0
988	48.25	-131.25	0	0
989	48.25	-131.75	0	0
990	48.25	-132.25	0	0
991	48.25	-132.75	0	0
992	48.25	-133.25	0	0
993	48.25	-133.75	0	0
994	48.25	-134.25	0	0
995	48.25	-134.75	0	0
996	48.25	-135.25	0	0
997	48.25	-135.75	0	0
998	48.25	-136.25	0	0
999	48.25	-136.75	0	0
1000	48.25	-137.25	0	0
1001	48.25	-137.75	0	0
1002	48.25	-138.25	0	0
1003	48.25	-138.75	0	0
1004	48.25	-139.25	0	0
1005	48.25	-139.75	0	0
1006	48.25	-140.25	0	0
1007	48.25	-140.75	0	0
1008	48.25	-141.25	0	0
1009	48.75	-69.75	0	0
1010	48.75	-70.25	0	0
1011	48.75	-70.75	1	0.0285714285714286
1012	48.75	-71.25	1	0.0285714285714286
1013	48.75	-71.75	1	0.0285714285714286
1014	48.75	-72.25	0	0
1015	48.75	-72.75	1	0.0285714285714286
1016	48.75	-73.25	2	0.0571428571428571
1017	48.75	-73.75	3	0.0857142857142857
1018	48.75	-74.25	3	0.0857142857142857
1019	48.75	-74.75	0	0
1020	48.75	-75.25	0	0
1021	48.75	-75.75	0	0
1022	48.75	-76.25	3	0.0857142857142857
1023	48.75	-76.75	1	0.0285714285714286
1024	48.75	-77.25	1	0.0285714285714286
1025	48.75	-77.75	0	0
1026	48.75	-78.25	0	0
1027	48.75	-78.75	0	0
1028	48.75	-79.25	0	0
1029	48.75	-79.75	0	0
1030	48.75	-80.25	1	0.0285714285714286
1031	48.75	-80.75	0	0
1032	48.75	-81.25	2	0.0571428571428571
1033	48.75	-81.75	1	0.0285714285714286
1034	48.75	-82.25	1	0.0285714285714286
1035	48.75	-82.75	0	0
1036	48.75	-83.25	0	0
1037	48.75	-83.75	2	0.0571428571428571
1038	48.75	-84.25	0	0
1039	48.75	-84.75	1	0.0285714285714286
1040	48.75	-85.25	1	0.0285714285714286
1041	48.75	-85.75	2	0.0571428571428571
1042	48.75	-86.25	1	0.0285714285714286
1043	48.75	-86.75	0	0
1044	48.75	-87.25	0	0
1045	48.75	-87.75	0	0
1046	48.75	-88.25	1	0.0285714285714286
1047	48.75	-88.75	1	0.0285714285714286
1048	48.75	-89.25	0	0
1049	48.75	-89.75	1	0.0285714285714286
1050	48.75	-90.25	1	0.0285714285714286
1051	48.75	-90.75	0	0
1052	48.75	-91.25	0	0
1053	48.75	-91.75	6	0.171428571428571
1054	48.75	-92.25	1	0.0285714285714286
1055	48.75	-92.75	0	0
1056	48.75	-93.25	0	0
1057	48.75	-93.75	2	0.0571428571428571
1058	48.75	-94.25	0	0
1059	48.75	-94.75	3	0.0857142857142857
1060	48.75	-95.25	0	0
1061	48.75	-95.75	0	0
1062	48.75	-96.25	0	0
1063	48.75	-96.75	0	0
1064	48.75	-97.25	0	0
1065	48.75	-97.75	0	0
1066	48.75	-98.25	0	0
1067	48.75	-98.75	0	0
1068	48.75	-99.25	0	0
1069	48.75	-99.75	0	0
1070	48.75	-100.25	0	0
1071	48.75	-100.75	0	0
1072	48.75	-101.25	0	0
1073	48.75	-101.75	0	0
1074	48.75	-102.25	0	0
1075	48.75	-102.75	0	0
1076	48.75	-103.25	0	0
1077	48.75	-103.75	0	0
1078	48.75	-104.25	0	0
1079	48.75	-104.75	0	0
1080	48.75	-105.25	0	0
1081	48.75	-105.75	0	0
1082	48.75	-106.25	0	0
1083	48.75	-106.75	0	0
1084	48.75	-107.25	0	0
1085	48.75	-107.75	0	0
1086	48.75	-108.25	0	0
1087	48.75	-108.75	0	0
1088	48.75	-109.25	0	0
1089	48.75	-109.75	0	0
1090	48.75	-110.25	0	0
1091	48.75	-110.75	0	0
1092	48.75	-111.25	0	0
1093	48.75	-111.75	0	0
1094	48.75	-112.25	0	0
1095	48.75	-112.75	0	0
1096	48.75	-113.25	0	0
1097	48.75	-113.75	0	0
1098	48.75	-114.25	0	0
1099	48.75	-114.75	0	0
1100	48.75	-115.25	0	0
1101	48.75	-115.75	0	0
1102	48.75	-116.25	0	0
1103	48.75	-116.75	0	0
1104	48.75	-117.25	0	0
1105	48.75	-117.75	0	0
1106	48.75	-118.25	0	0
1107	48.75	-118.75	0	0
1108	48.75	-119.25	0	0
1109	48.75	-119.75	0	0
1110	48.75	-120.25	0	0
1111	48.75	-120.75	0	0
1112	48.75	-121.25	0	0
1113	48.75	-121.75	0	0
1114	48.75	-122.25	0	0
1115	48.75	-122.75	0	0
1116	48.75	-123.25	0	0
1117	48.75	-123.75	0	0
1118	48.75	-124.25	1	0.0285714285714286
1119	48.75	-124.75	0	0
1120	48.75	-125.25	0	0
1121	48.75	-125.75	0	0
1122	48.75	-126.25	0	0
1123	48.75	-126.75	0	0
1124	48.75	-127.25	0	0
1125	48.75	-127.75	0	0
1126	48.75	-128.25	0	0
1127	48.75	-128.75	0	0
1128	48.75	-129.25	0	0
1129	48.75	-129.75	0	0
1130	48.75	-130.25	0	0
1131	48.75	-130.75	0	0
1132	48.75	-131.25	0	0
1133	48.75	-131.75	0	0
1134	48.75	-132.25	0	0
1135	48.75	-132.75	0	0
1136	48.75	-133.25	0	0
1137	48.75	-133.75	0	0
1138	48.75	-134.25	0	0
1139	48.75	-134.75	0	0
1140	48.75	-135.25	0	0
1141	48.75	-135.75	0	0
1142	48.75	-136.25	0	0
1143	48.75	-136.75	0	0
1144	48.75	-137.25	0	0
1145	48.75	-137.75	0	0
1146	48.75	-138.25	0	0
1147	48.75	-138.75	0	0
1148	48.75	-139.25	0	0
1149	48.75	-139.75	0	0
1150	48.75	-140.25	0	0
1151	48.75	-140.75	0	0
1152	48.75	-141.25	0	0
1153	49.25	-69.75	1	0.0285714285714286
1154	49.25	-70.25	3	0.0857142857142857
1155	49.25	-70.75	4	0.114285714285714
1156	49.25	-71.25	0	0
1157	49.25	-71.75	1	0.0285714285714286
1158	49.25	-72.25	1	0.0285714285714286
1159	49.25	-72.75	0	0
1160	49.25	-73.25	5	0.142857142857143
1161	49.25	-73.75	1	0.0285714285714286
1162	49.25	-74.25	2	0.0571428571428571
1163	49.25	-74.75	3	0.0857142857142857
1164	49.25	-75.25	2	0.0571428571428571
1165	49.25	-75.75	1	0.0285714285714286
1166	49.25	-76.25	0	0
1167	49.25	-76.75	3	0.0857142857142857
1168	49.25	-77.25	2	0.0571428571428571
1169	49.25	-77.75	0	0
1170	49.25	-78.25	1	0.0285714285714286
1171	49.25	-78.75	0	0
1172	49.25	-79.25	0	0
1173	49.25	-79.75	2	0.0571428571428571
1174	49.25	-80.25	0	0
1175	49.25	-80.75	1	0.0285714285714286
1176	49.25	-81.25	0	0
1177	49.25	-81.75	0	0
1178	49.25	-82.25	1	0.0285714285714286
1179	49.25	-82.75	1	0.0285714285714286
1180	49.25	-83.25	0	0
1181	49.25	-83.75	1	0.0285714285714286
1182	49.25	-84.25	1	0.0285714285714286
1183	49.25	-84.75	2	0.0571428571428571
1184	49.25	-85.25	1	0.0285714285714286
1185	49.25	-85.75	1	0.0285714285714286
1186	49.25	-86.25	1	0.0285714285714286
1187	49.25	-86.75	2	0.0571428571428571
1188	49.25	-87.25	7	0.2
1189	49.25	-87.75	2	0.0571428571428571
1190	49.25	-88.25	1	0.0285714285714286
1191	49.25	-88.75	3	0.0857142857142857
1192	49.25	-89.25	9	0.257142857142857
1193	49.25	-89.75	3	0.0857142857142857
1194	49.25	-90.25	2	0.0571428571428571
1195	49.25	-90.75	2	0.0571428571428571
1196	49.25	-91.25	3	0.0857142857142857
1197	49.25	-91.75	3	0.0857142857142857
1198	49.25	-92.25	1	0.0285714285714286
1199	49.25	-92.75	2	0.0571428571428571
1200	49.25	-93.25	1	0.0285714285714286
1201	49.25	-93.75	0	0
1202	49.25	-94.25	2	0.0571428571428571
1203	49.25	-94.75	17	0.485714285714286
1204	49.25	-95.25	0	0
1205	49.25	-95.75	4	0.114285714285714
1206	49.25	-96.25	6	0.171428571428571
1207	49.25	-96.75	23	0.657142857142857
1208	49.25	-97.25	0	0
1209	49.25	-97.75	0	0
1210	49.25	-98.25	0	0
1211	49.25	-98.75	0	0
1212	49.25	-99.25	0	0
1213	49.25	-99.75	0	0
1214	49.25	-100.25	0	0
1215	49.25	-100.75	0	0
1216	49.25	-101.25	0	0
1217	49.25	-101.75	0	0
1218	49.25	-102.25	0	0
1219	49.25	-102.75	0	0
1220	49.25	-103.25	0	0
1221	49.25	-103.75	0	0
1222	49.25	-104.25	0	0
1223	49.25	-104.75	0	0
1224	49.25	-105.25	0	0
1225	49.25	-105.75	0	0
1226	49.25	-106.25	1	0.0285714285714286
1227	49.25	-106.75	0	0
1228	49.25	-107.25	3	0.0857142857142857
1229	49.25	-107.75	3	0.0857142857142857
1230	49.25	-108.25	1	0.0285714285714286
1231	49.25	-108.75	0	0
1232	49.25	-109.25	0	0
1233	49.25	-109.75	0	0
1234	49.25	-110.25	0	0
1235	49.25	-110.75	0	0
1236	49.25	-111.25	0	0
1237	49.25	-111.75	0	0
1238	49.25	-112.25	0	0
1239	49.25	-112.75	0	0
1240	49.25	-113.25	0	0
1241	49.25	-113.75	1	0.0285714285714286
1242	49.25	-114.25	3	0.0857142857142857
1243	49.25	-114.75	3	0.0857142857142857
1244	49.25	-115.25	3	0.0857142857142857
1245	49.25	-115.75	1	0.0285714285714286
1246	49.25	-116.25	2	0.0571428571428571
1247	49.25	-116.75	1	0.0285714285714286
1248	49.25	-117.25	1	0.0285714285714286
1249	49.25	-117.75	1	0.0285714285714286
1250	49.25	-118.25	0	0
1251	49.25	-118.75	2	0.0571428571428571
1252	49.25	-119.25	1	0.0285714285714286
1253	49.25	-119.75	5	0.142857142857143
1254	49.25	-120.25	1	0.0285714285714286
1255	49.25	-120.75	4	0.114285714285714
1256	49.25	-121.25	1	0.0285714285714286
1257	49.25	-121.75	0	0
1258	49.25	-122.25	0	0
1259	49.25	-122.75	0	0
1260	49.25	-123.25	1	0.0285714285714286
1261	49.25	-123.75	0	0
1262	49.25	-124.25	0	0
1263	49.25	-124.75	0	0
1264	49.25	-125.25	0	0
1265	49.25	-125.75	0	0
1266	49.25	-126.25	0	0
1267	49.25	-126.75	0	0
1268	49.25	-127.25	0	0
1269	49.25	-127.75	0	0
1270	49.25	-128.25	0	0
1271	49.25	-128.75	0	0
1272	49.25	-129.25	0	0
1273	49.25	-129.75	0	0
1274	49.25	-130.25	0	0
1275	49.25	-130.75	0	0
1276	49.25	-131.25	0	0
1277	49.25	-131.75	0	0
1278	49.25	-132.25	0	0
1279	49.25	-132.75	0	0
1280	49.25	-133.25	0	0
1281	49.25	-133.75	0	0
1282	49.25	-134.25	0	0
1283	49.25	-134.75	0	0
1284	49.25	-135.25	0	0
1285	49.25	-135.75	0	0
1286	49.25	-136.25	0	0
1287	49.25	-136.75	0	0
1288	49.25	-137.25	0	0
1289	49.25	-137.75	0	0
1290	49.25	-138.25	0	0
1291	49.25	-138.75	0	0
1292	49.25	-139.25	0	0
1293	49.25	-139.75	0	0
1294	49.25	-140.25	0	0
1295	49.25	-140.75	0	0
1296	49.25	-141.25	0	0
1297	49.75	-69.75	2	0.0571428571428571
1298	49.75	-70.25	1	0.0285714285714286
1299	49.75	-70.75	5	0.142857142857143
1300	49.75	-71.25	2	0.0571428571428571
1301	49.75	-71.75	2	0.0571428571428571
1302	49.75	-72.25	2	0.0571428571428571
1303	49.75	-72.75	3	0.0857142857142857
1304	49.75	-73.25	3	0.0857142857142857
1305	49.75	-73.75	6	0.171428571428571
1306	49.75	-74.25	4	0.114285714285714
1307	49.75	-74.75	2	0.0571428571428571
1308	49.75	-75.25	0	0
1309	49.75	-75.75	4	0.114285714285714
1310	49.75	-76.25	3	0.0857142857142857
1311	49.75	-76.75	4	0.114285714285714
1312	49.75	-77.25	0	0
1313	49.75	-77.75	0	0
1314	49.75	-78.25	0	0
1315	49.75	-78.75	1	0.0285714285714286
1316	49.75	-79.25	0	0
1317	49.75	-79.75	0	0
1318	49.75	-80.25	0	0
1319	49.75	-80.75	1	0.0285714285714286
1320	49.75	-81.25	2	0.0571428571428571
1321	49.75	-81.75	1	0.0285714285714286
1322	49.75	-82.25	2	0.0571428571428571
1323	49.75	-82.75	1	0.0285714285714286
1324	49.75	-83.25	1	0.0285714285714286
1325	49.75	-83.75	0	0
1326	49.75	-84.25	1	0.0285714285714286
1327	49.75	-84.75	0	0
1328	49.75	-85.25	0	0
1329	49.75	-85.75	1	0.0285714285714286
1330	49.75	-86.25	3	0.0857142857142857
1331	49.75	-86.75	5	0.142857142857143
1332	49.75	-87.25	5	0.142857142857143
1333	49.75	-87.75	1	0.0285714285714286
1334	49.75	-88.25	1	0.0285714285714286
1335	49.75	-88.75	2	0.0571428571428571
1336	49.75	-89.25	10	0.285714285714286
1337	49.75	-89.75	3	0.0857142857142857
1338	49.75	-90.25	10	0.285714285714286
1339	49.75	-90.75	9	0.257142857142857
1340	49.75	-91.25	0	0
1341	49.75	-91.75	1	0.0285714285714286
1342	49.75	-92.25	4	0.114285714285714
1343	49.75	-92.75	1	0.0285714285714286
1344	49.75	-93.25	0	0
1345	49.75	-93.75	2	0.0571428571428571
1346	49.75	-94.25	4	0.114285714285714
1347	49.75	-94.75	1	0.0285714285714286
1348	49.75	-95.25	1	0.0285714285714286
1349	49.75	-95.75	0	0
1350	49.75	-96.25	9	0.257142857142857
1351	49.75	-96.75	19	0.542857142857143
1352	49.75	-97.25	1	0.0285714285714286
1353	49.75	-97.75	0	0
1354	49.75	-98.25	0	0
1355	49.75	-98.75	0	0
1356	49.75	-99.25	0	0
1357	49.75	-99.75	5	0.142857142857143
1358	49.75	-100.25	1	0.0285714285714286
1359	49.75	-100.75	0	0
1360	49.75	-101.25	0	0
1361	49.75	-101.75	0	0
1362	49.75	-102.25	0	0
1363	49.75	-102.75	1	0.0285714285714286
1364	49.75	-103.25	0	0
1365	49.75	-103.75	2	0.0571428571428571
1366	49.75	-104.25	0	0
1367	49.75	-104.75	0	0
1368	49.75	-105.25	0	0
1369	49.75	-105.75	0	0
1370	49.75	-106.25	0	0
1371	49.75	-106.75	0	0
1372	49.75	-107.25	0	0
1373	49.75	-107.75	1	0.0285714285714286
1374	49.75	-108.25	0	0
1375	49.75	-108.75	0	0
1376	49.75	-109.25	1	0.0285714285714286
1377	49.75	-109.75	0	0
1378	49.75	-110.25	0	0
1379	49.75	-110.75	0	0
1380	49.75	-111.25	0	0
1381	49.75	-111.75	0	0
1382	49.75	-112.25	0	0
1383	49.75	-112.75	0	0
1384	49.75	-113.25	0	0
1385	49.75	-113.75	0	0
1386	49.75	-114.25	1	0.0285714285714286
1387	49.75	-114.75	2	0.0571428571428571
1388	49.75	-115.25	2	0.0571428571428571
1389	49.75	-115.75	6	0.171428571428571
1390	49.75	-116.25	3	0.0857142857142857
1391	49.75	-116.75	5	0.142857142857143
1392	49.75	-117.25	2	0.0571428571428571
1393	49.75	-117.75	2	0.0571428571428571
1394	49.75	-118.25	1	0.0285714285714286
1395	49.75	-118.75	0	0
1396	49.75	-119.25	2	0.0571428571428571
1397	49.75	-119.75	5	0.142857142857143
1398	49.75	-120.25	2	0.0571428571428571
1399	49.75	-120.75	4	0.114285714285714
1400	49.75	-121.25	2	0.0571428571428571
1401	49.75	-121.75	3	0.0857142857142857
1402	49.75	-122.25	1	0.0285714285714286
1403	49.75	-122.75	0	0
1404	49.75	-123.25	0	0
1405	49.75	-123.75	1	0.0285714285714286
1406	49.75	-124.25	0	0
1407	49.75	-124.75	0	0
1408	49.75	-125.25	0	0
1409	49.75	-125.75	1	0.0285714285714286
1410	49.75	-126.25	0	0
1411	49.75	-126.75	0	0
1412	49.75	-127.25	0	0
1413	49.75	-127.75	0	0
1414	49.75	-128.25	0	0
1415	49.75	-128.75	0	0
1416	49.75	-129.25	0	0
1417	49.75	-129.75	0	0
1418	49.75	-130.25	0	0
1419	49.75	-130.75	0	0
1420	49.75	-131.25	0	0
1421	49.75	-131.75	0	0
1422	49.75	-132.25	0	0
1423	49.75	-132.75	0	0
1424	49.75	-133.25	0	0
1425	49.75	-133.75	0	0
1426	49.75	-134.25	0	0
1427	49.75	-134.75	0	0
1428	49.75	-135.25	0	0
1429	49.75	-135.75	0	0
1430	49.75	-136.25	0	0
1431	49.75	-136.75	0	0
1432	49.75	-137.25	0	0
1433	49.75	-137.75	0	0
1434	49.75	-138.25	0	0
1435	49.75	-138.75	0	0
1436	49.75	-139.25	0	0
1437	49.75	-139.75	0	0
1438	49.75	-140.25	0	0
1439	49.75	-140.75	0	0
1440	49.75	-141.25	0	0
1441	50.25	-69.75	3	0.0857142857142857
1442	50.25	-70.25	2	0.0571428571428571
1443	50.25	-70.75	3	0.0857142857142857
1444	50.25	-71.25	4	0.114285714285714
1445	50.25	-71.75	1	0.0285714285714286
1446	50.25	-72.25	6	0.171428571428571
1447	50.25	-72.75	4	0.114285714285714
1448	50.25	-73.25	6	0.171428571428571
1449	50.25	-73.75	7	0.2
1450	50.25	-74.25	1	0.0285714285714286
1451	50.25	-74.75	5	0.142857142857143
1452	50.25	-75.25	3	0.0857142857142857
1453	50.25	-75.75	6	0.171428571428571
1454	50.25	-76.25	5	0.142857142857143
1455	50.25	-76.75	3	0.0857142857142857
1456	50.25	-77.25	1	0.0285714285714286
1457	50.25	-77.75	0	0
1458	50.25	-78.25	1	0.0285714285714286
1459	50.25	-78.75	3	0.0857142857142857
1460	50.25	-79.25	2	0.0571428571428571
1461	50.25	-79.75	1	0.0285714285714286
1462	50.25	-80.25	2	0.0571428571428571
1463	50.25	-80.75	1	0.0285714285714286
1464	50.25	-81.25	4	0.114285714285714
1465	50.25	-81.75	3	0.0857142857142857
1466	50.25	-82.25	3	0.0857142857142857
1467	50.25	-82.75	0	0
1468	50.25	-83.25	0	0
1469	50.25	-83.75	0	0
1470	50.25	-84.25	0	0
1471	50.25	-84.75	0	0
1472	50.25	-85.25	3	0.0857142857142857
1473	50.25	-85.75	3	0.0857142857142857
1474	50.25	-86.25	0	0
1475	50.25	-86.75	2	0.0571428571428571
1476	50.25	-87.25	3	0.0857142857142857
1477	50.25	-87.75	3	0.0857142857142857
1478	50.25	-88.25	2	0.0571428571428571
1479	50.25	-88.75	3	0.0857142857142857
1480	50.25	-89.25	5	0.142857142857143
1481	50.25	-89.75	2	0.0571428571428571
1482	50.25	-90.25	9	0.257142857142857
1483	50.25	-90.75	5	0.142857142857143
1484	50.25	-91.25	1	0.0285714285714286
1485	50.25	-91.75	3	0.0857142857142857
1486	50.25	-92.25	1	0.0285714285714286
1487	50.25	-92.75	1	0.0285714285714286
1488	50.25	-93.25	1	0.0285714285714286
1489	50.25	-93.75	1	0.0285714285714286
1490	50.25	-94.25	0	0
1491	50.25	-94.75	1	0.0285714285714286
1492	50.25	-95.25	5	0.142857142857143
1493	50.25	-95.75	2	0.0571428571428571
1494	50.25	-96.25	6	0.171428571428571
1495	50.25	-96.75	18	0.514285714285714
1496	50.25	-97.25	0	0
1497	50.25	-97.75	0	0
1498	50.25	-98.25	0	0
1499	50.25	-98.75	1	0.0285714285714286
1500	50.25	-99.25	0	0
1501	50.25	-99.75	2	0.0571428571428571
1502	50.25	-100.25	0	0
1503	50.25	-100.75	0	0
1504	50.25	-101.25	0	0
1505	50.25	-101.75	0	0
1506	50.25	-102.25	2	0.0571428571428571
1507	50.25	-102.75	2	0.0571428571428571
1508	50.25	-103.25	0	0
1509	50.25	-103.75	0	0
1510	50.25	-104.25	0	0
1511	50.25	-104.75	0	0
1512	50.25	-105.25	0	0
1513	50.25	-105.75	0	0
1514	50.25	-106.25	1	0.0285714285714286
1515	50.25	-106.75	0	0
1516	50.25	-107.25	0	0
1517	50.25	-107.75	0	0
1518	50.25	-108.25	0	0
1519	50.25	-108.75	0	0
1520	50.25	-109.25	0	0
1521	50.25	-109.75	1	0.0285714285714286
1522	50.25	-110.25	1	0.0285714285714286
1523	50.25	-110.75	0	0
1524	50.25	-111.25	0	0
1525	50.25	-111.75	0	0
1526	50.25	-112.25	0	0
1527	50.25	-112.75	0	0
1528	50.25	-113.25	0	0
1529	50.25	-113.75	0	0
1530	50.25	-114.25	1	0.0285714285714286
1531	50.25	-114.75	1	0.0285714285714286
1532	50.25	-115.25	5	0.142857142857143
1533	50.25	-115.75	8	0.228571428571429
1534	50.25	-116.25	4	0.114285714285714
1535	50.25	-116.75	4	0.114285714285714
1536	50.25	-117.25	10	0.285714285714286
1537	50.25	-117.75	2	0.0571428571428571
1538	50.25	-118.25	6	0.171428571428571
1539	50.25	-118.75	0	0
1540	50.25	-119.25	3	0.0857142857142857
1541	50.25	-119.75	5	0.142857142857143
1542	50.25	-120.25	1	0.0285714285714286
1543	50.25	-120.75	2	0.0571428571428571
1544	50.25	-121.25	3	0.0857142857142857
1545	50.25	-121.75	7	0.2
1546	50.25	-122.25	3	0.0857142857142857
1547	50.25	-122.75	2	0.0571428571428571
1548	50.25	-123.25	1	0.0285714285714286
1549	50.25	-123.75	0	0
1550	50.25	-124.25	0	0
1551	50.25	-124.75	0	0
1552	50.25	-125.25	0	0
1553	50.25	-125.75	2	0.0571428571428571
1554	50.25	-126.25	0	0
1555	50.25	-126.75	1	0.0285714285714286
1556	50.25	-127.25	0	0
1557	50.25	-127.75	0	0
1558	50.25	-128.25	0	0
1559	50.25	-128.75	0	0
1560	50.25	-129.25	0	0
1561	50.25	-129.75	0	0
1562	50.25	-130.25	0	0
1563	50.25	-130.75	0	0
1564	50.25	-131.25	0	0
1565	50.25	-131.75	0	0
1566	50.25	-132.25	0	0
1567	50.25	-132.75	0	0
1568	50.25	-133.25	0	0
1569	50.25	-133.75	0	0
1570	50.25	-134.25	0	0
1571	50.25	-134.75	0	0
1572	50.25	-135.25	0	0
1573	50.25	-135.75	0	0
1574	50.25	-136.25	0	0
1575	50.25	-136.75	0	0
1576	50.25	-137.25	0	0
1577	50.25	-137.75	0	0
1578	50.25	-138.25	0	0
1579	50.25	-138.75	0	0
1580	50.25	-139.25	0	0
1581	50.25	-139.75	0	0
1582	50.25	-140.25	0	0
1583	50.25	-140.75	0	0
1584	50.25	-141.25	0	0
1585	50.75	-69.75	1	0.0285714285714286
1586	50.75	-70.25	1	0.0285714285714286
1587	50.75	-70.75	1	0.0285714285714286
1588	50.75	-71.25	5	0.142857142857143
1589	50.75	-71.75	8	0.228571428571429
1590	50.75	-72.25	6	0.171428571428571
1591	50.75	-72.75	6	0.171428571428571
1592	50.75	-73.25	9	0.257142857142857
1593	50.75	-73.75	3	0.0857142857142857
1594	50.75	-74.25	6	0.171428571428571
1595	50.75	-74.75	9	0.257142857142857
1596	50.75	-75.25	8	0.228571428571429
1597	50.75	-75.75	10	0.285714285714286
1598	50.75	-76.25	9	0.257142857142857
1599	50.75	-76.75	5	0.142857142857143
1600	50.75	-77.25	3	0.0857142857142857
1601	50.75	-77.75	5	0.142857142857143
1602	50.75	-78.25	1	0.0285714285714286
1603	50.75	-78.75	1	0.0285714285714286
1604	50.75	-79.25	7	0.2
1605	50.75	-79.75	5	0.142857142857143
1606	50.75	-80.25	3	0.0857142857142857
1607	50.75	-80.75	0	0
1608	50.75	-81.25	4	0.114285714285714
1609	50.75	-81.75	3	0.0857142857142857
1610	50.75	-82.25	1	0.0285714285714286
1611	50.75	-82.75	3	0.0857142857142857
1612	50.75	-83.25	1	0.0285714285714286
1613	50.75	-83.75	1	0.0285714285714286
1614	50.75	-84.25	0	0
1615	50.75	-84.75	3	0.0857142857142857
1616	50.75	-85.25	0	0
1617	50.75	-85.75	0	0
1618	50.75	-86.25	0	0
1619	50.75	-86.75	1	0.0285714285714286
1620	50.75	-87.25	1	0.0285714285714286
1621	50.75	-87.75	1	0.0285714285714286
1622	50.75	-88.25	2	0.0571428571428571
1623	50.75	-88.75	4	0.114285714285714
1624	50.75	-89.25	6	0.171428571428571
1625	50.75	-89.75	11	0.314285714285714
1626	50.75	-90.25	15	0.428571428571429
1627	50.75	-90.75	0	0
1628	50.75	-91.25	0	0
1629	50.75	-91.75	3	0.0857142857142857
1630	50.75	-92.25	2	0.0571428571428571
1631	50.75	-92.75	2	0.0571428571428571
1632	50.75	-93.25	1	0.0285714285714286
1633	50.75	-93.75	3	0.0857142857142857
1634	50.75	-94.25	2	0.0571428571428571
1635	50.75	-94.75	4	0.114285714285714
1636	50.75	-95.25	7	0.2
1637	50.75	-95.75	3	0.0857142857142857
1638	50.75	-96.25	13	0.371428571428571
1639	50.75	-96.75	18	0.514285714285714
1640	50.75	-97.25	3	0.0857142857142857
1641	50.75	-97.75	7	0.2
1642	50.75	-98.25	4	0.114285714285714
1643	50.75	-98.75	1	0.0285714285714286
1644	50.75	-99.25	3	0.0857142857142857
1645	50.75	-99.75	3	0.0857142857142857
1646	50.75	-100.25	0	0
1647	50.75	-100.75	0	0
1648	50.75	-101.25	0	0
1649	50.75	-101.75	0	0
1650	50.75	-102.25	1	0.0285714285714286
1651	50.75	-102.75	0	0
1652	50.75	-103.25	1	0.0285714285714286
1653	50.75	-103.75	0	0
1654	50.75	-104.25	0	0
1655	50.75	-104.75	0	0
1656	50.75	-105.25	0	0
1657	50.75	-105.75	0	0
1658	50.75	-106.25	0	0
1659	50.75	-106.75	0	0
1660	50.75	-107.25	0	0
1661	50.75	-107.75	0	0
1662	50.75	-108.25	1	0.0285714285714286
1663	50.75	-108.75	0	0
1664	50.75	-109.25	0	0
1665	50.75	-109.75	0	0
1666	50.75	-110.25	0	0
1667	50.75	-110.75	0	0
1668	50.75	-111.25	0	0
1669	50.75	-111.75	0	0
1670	50.75	-112.25	0	0
1671	50.75	-112.75	0	0
1672	50.75	-113.25	0	0
1673	50.75	-113.75	0	0
1674	50.75	-114.25	0	0
1675	50.75	-114.75	1	0.0285714285714286
1676	50.75	-115.25	2	0.0571428571428571
1677	50.75	-115.75	5	0.142857142857143
1678	50.75	-116.25	3	0.0857142857142857
1679	50.75	-116.75	0	0
1680	50.75	-117.25	7	0.2
1681	50.75	-117.75	7	0.2
1682	50.75	-118.25	4	0.114285714285714
1683	50.75	-118.75	4	0.114285714285714
1684	50.75	-119.25	0	0
1685	50.75	-119.75	3	0.0857142857142857
1686	50.75	-120.25	1	0.0285714285714286
1687	50.75	-120.75	5	0.142857142857143
1688	50.75	-121.25	2	0.0571428571428571
1689	50.75	-121.75	12	0.342857142857143
1690	50.75	-122.25	9	0.257142857142857
1691	50.75	-122.75	2	0.0571428571428571
1692	50.75	-123.25	8	0.228571428571429
1693	50.75	-123.75	3	0.0857142857142857
1694	50.75	-124.25	0	0
1695	50.75	-124.75	1	0.0285714285714286
1696	50.75	-125.25	1	0.0285714285714286
1697	50.75	-125.75	0	0
1698	50.75	-126.25	0	0
1699	50.75	-126.75	0	0
1700	50.75	-127.25	0	0
1701	50.75	-127.75	0	0
1702	50.75	-128.25	0	0
1703	50.75	-128.75	0	0
1704	50.75	-129.25	0	0
1705	50.75	-129.75	0	0
1706	50.75	-130.25	0	0
1707	50.75	-130.75	0	0
1708	50.75	-131.25	0	0
1709	50.75	-131.75	0	0
1710	50.75	-132.25	0	0
1711	50.75	-132.75	0	0
1712	50.75	-133.25	0	0
1713	50.75	-133.75	0	0
1714	50.75	-134.25	0	0
1715	50.75	-134.75	0	0
1716	50.75	-135.25	0	0
1717	50.75	-135.75	0	0
1718	50.75	-136.25	0	0
1719	50.75	-136.75	0	0
1720	50.75	-137.25	0	0
1721	50.75	-137.75	0	0
1722	50.75	-138.25	0	0
1723	50.75	-138.75	0	0
1724	50.75	-139.25	0	0
1725	50.75	-139.75	0	0
1726	50.75	-140.25	0	0
1727	50.75	-140.75	0	0
1728	50.75	-141.25	0	0
1729	51.25	-69.75	2	0.0571428571428571
1730	51.25	-70.25	6	0.171428571428571
1731	51.25	-70.75	11	0.314285714285714
1732	51.25	-71.25	6	0.171428571428571
1733	51.25	-71.75	6	0.171428571428571
1734	51.25	-72.25	10	0.285714285714286
1735	51.25	-72.75	2	0.0571428571428571
1736	51.25	-73.25	1	0.0285714285714286
1737	51.25	-73.75	5	0.142857142857143
1738	51.25	-74.25	10	0.285714285714286
1739	51.25	-74.75	2	0.0571428571428571
1740	51.25	-75.25	10	0.285714285714286
1741	51.25	-75.75	14	0.4
1742	51.25	-76.25	8	0.228571428571429
1743	51.25	-76.75	9	0.257142857142857
1744	51.25	-77.25	5	0.142857142857143
1745	51.25	-77.75	5	0.142857142857143
1746	51.25	-78.25	10	0.285714285714286
1747	51.25	-78.75	7	0.2
1748	51.25	-79.25	3	0.0857142857142857
1749	51.25	-79.75	1	0.0285714285714286
1750	51.25	-80.25	1	0.0285714285714286
1751	51.25	-80.75	2	0.0571428571428571
1752	51.25	-81.25	4	0.114285714285714
1753	51.25	-81.75	0	0
1754	51.25	-82.25	0	0
1755	51.25	-82.75	1	0.0285714285714286
1756	51.25	-83.25	2	0.0571428571428571
1757	51.25	-83.75	0	0
1758	51.25	-84.25	1	0.0285714285714286
1759	51.25	-84.75	2	0.0571428571428571
1760	51.25	-85.25	2	0.0571428571428571
1761	51.25	-85.75	2	0.0571428571428571
1762	51.25	-86.25	5	0.142857142857143
1763	51.25	-86.75	1	0.0285714285714286
1764	51.25	-87.25	4	0.114285714285714
1765	51.25	-87.75	4	0.114285714285714
1766	51.25	-88.25	5	0.142857142857143
1767	51.25	-88.75	5	0.142857142857143
1768	51.25	-89.25	4	0.114285714285714
1769	51.25	-89.75	6	0.171428571428571
1770	51.25	-90.25	5	0.142857142857143
1771	51.25	-90.75	3	0.0857142857142857
1772	51.25	-91.25	2	0.0571428571428571
1773	51.25	-91.75	2	0.0571428571428571
1774	51.25	-92.25	1	0.0285714285714286
1775	51.25	-92.75	5	0.142857142857143
1776	51.25	-93.25	1	0.0285714285714286
1777	51.25	-93.75	1	0.0285714285714286
1778	51.25	-94.25	2	0.0571428571428571
1779	51.25	-94.75	9	0.257142857142857
1780	51.25	-95.25	15	0.428571428571429
1781	51.25	-95.75	5	0.142857142857143
1782	51.25	-96.25	5	0.142857142857143
1783	51.25	-96.75	3	0.0857142857142857
1784	51.25	-97.25	8	0.228571428571429
1785	51.25	-97.75	9	0.257142857142857
1786	51.25	-98.25	16	0.457142857142857
1787	51.25	-98.75	4	0.114285714285714
1788	51.25	-99.25	10	0.285714285714286
1789	51.25	-99.75	4	0.114285714285714
1790	51.25	-100.25	4	0.114285714285714
1791	51.25	-100.75	10	0.285714285714286
1792	51.25	-101.25	0	0
1793	51.25	-101.75	1	0.0285714285714286
1794	51.25	-102.25	0	0
1795	51.25	-102.75	0	0
1796	51.25	-103.25	0	0
1797	51.25	-103.75	0	0
1798	51.25	-104.25	0	0
1799	51.25	-104.75	0	0
1800	51.25	-105.25	0	0
1801	51.25	-105.75	0	0
1802	51.25	-106.25	0	0
1803	51.25	-106.75	0	0
1804	51.25	-107.25	0	0
1805	51.25	-107.75	0	0
1806	51.25	-108.25	0	0
1807	51.25	-108.75	0	0
1808	51.25	-109.25	0	0
1809	51.25	-109.75	0	0
1810	51.25	-110.25	0	0
1811	51.25	-110.75	0	0
1812	51.25	-111.25	0	0
1813	51.25	-111.75	0	0
1814	51.25	-112.25	0	0
1815	51.25	-112.75	0	0
1816	51.25	-113.25	0	0
1817	51.25	-113.75	0	0
1818	51.25	-114.25	0	0
1819	51.25	-114.75	0	0
1820	51.25	-115.25	1	0.0285714285714286
1821	51.25	-115.75	5	0.142857142857143
1822	51.25	-116.25	10	0.285714285714286
1823	51.25	-116.75	4	0.114285714285714
1824	51.25	-117.25	7	0.2
1825	51.25	-117.75	3	0.0857142857142857
1826	51.25	-118.25	7	0.2
1827	51.25	-118.75	6	0.171428571428571
1828	51.25	-119.25	3	0.0857142857142857
1829	51.25	-119.75	1	0.0285714285714286
1830	51.25	-120.25	4	0.114285714285714
1831	51.25	-120.75	3	0.0857142857142857
1832	51.25	-121.25	3	0.0857142857142857
1833	51.25	-121.75	1	0.0285714285714286
1834	51.25	-122.25	8	0.228571428571429
1835	51.25	-122.75	4	0.114285714285714
1836	51.25	-123.25	1	0.0285714285714286
1837	51.25	-123.75	0	0
1838	51.25	-124.25	2	0.0571428571428571
1839	51.25	-124.75	2	0.0571428571428571
1840	51.25	-125.25	3	0.0857142857142857
1841	51.25	-125.75	0	0
1842	51.25	-126.25	0	0
1843	51.25	-126.75	0	0
1844	51.25	-127.25	0	0
1845	51.25	-127.75	0	0
1846	51.25	-128.25	0	0
1847	51.25	-128.75	0	0
1848	51.25	-129.25	0	0
1849	51.25	-129.75	0	0
1850	51.25	-130.25	0	0
1851	51.25	-130.75	0	0
1852	51.25	-131.25	0	0
1853	51.25	-131.75	0	0
1854	51.25	-132.25	0	0
1855	51.25	-132.75	0	0
1856	51.25	-133.25	0	0
1857	51.25	-133.75	0	0
1858	51.25	-134.25	0	0
1859	51.25	-134.75	0	0
1860	51.25	-135.25	0	0
1861	51.25	-135.75	0	0
1862	51.25	-136.25	0	0
1863	51.25	-136.75	0	0
1864	51.25	-137.25	0	0
1865	51.25	-137.75	0	0
1866	51.25	-138.25	0	0
1867	51.25	-138.75	0	0
1868	51.25	-139.25	0	0
1869	51.25	-139.75	0	0
1870	51.25	-140.25	0	0
1871	51.25	-140.75	0	0
1872	51.25	-141.25	0	0
1873	51.75	-69.75	2	0.0571428571428571
1874	51.75	-70.25	3	0.0857142857142857
1875	51.75	-70.75	2	0.0571428571428571
1876	51.75	-71.25	6	0.171428571428571
1877	51.75	-71.75	13	0.371428571428571
1878	51.75	-72.25	6	0.171428571428571
1879	51.75	-72.75	3	0.0857142857142857
1880	51.75	-73.25	1	0.0285714285714286
1881	51.75	-73.75	3	0.0857142857142857
1882	51.75	-74.25	5	0.142857142857143
1883	51.75	-74.75	6	0.171428571428571
1884	51.75	-75.25	10	0.285714285714286
1885	51.75	-75.75	5	0.142857142857143
1886	51.75	-76.25	8	0.228571428571429
1887	51.75	-76.75	19	0.542857142857143
1888	51.75	-77.25	17	0.485714285714286
1889	51.75	-77.75	9	0.257142857142857
1890	51.75	-78.25	9	0.257142857142857
1891	51.75	-78.75	10	0.285714285714286
1892	51.75	-79.25	1	0.0285714285714286
1893	51.75	-79.75	2	0.0571428571428571
1894	51.75	-80.25	0	0
1895	51.75	-80.75	0	0
1896	51.75	-81.25	0	0
1897	51.75	-81.75	4	0.114285714285714
1898	51.75	-82.25	1	0.0285714285714286
1899	51.75	-82.75	2	0.0571428571428571
1900	51.75	-83.25	1	0.0285714285714286
1901	51.75	-83.75	3	0.0857142857142857
1902	51.75	-84.25	2	0.0571428571428571
1903	51.75	-84.75	1	0.0285714285714286
1904	51.75	-85.25	0	0
1905	51.75	-85.75	1	0.0285714285714286
1906	51.75	-86.25	8	0.228571428571429
1907	51.75	-86.75	4	0.114285714285714
1908	51.75	-87.25	8	0.228571428571429
1909	51.75	-87.75	1	0.0285714285714286
1910	51.75	-88.25	8	0.228571428571429
1911	51.75	-88.75	6	0.171428571428571
1912	51.75	-89.25	2	0.0571428571428571
1913	51.75	-89.75	2	0.0571428571428571
1914	51.75	-90.25	4	0.114285714285714
1915	51.75	-90.75	2	0.0571428571428571
1916	51.75	-91.25	3	0.0857142857142857
1917	51.75	-91.75	1	0.0285714285714286
1918	51.75	-92.25	2	0.0571428571428571
1919	51.75	-92.75	4	0.114285714285714
1920	51.75	-93.25	2	0.0571428571428571
1921	51.75	-93.75	0	0
1922	51.75	-94.25	3	0.0857142857142857
1923	51.75	-94.75	8	0.228571428571429
1924	51.75	-95.25	4	0.114285714285714
1925	51.75	-95.75	15	0.428571428571429
1926	51.75	-96.25	1	0.0285714285714286
1927	51.75	-96.75	6	0.171428571428571
1928	51.75	-97.25	1	0.0285714285714286
1929	51.75	-97.75	25	0.714285714285714
1930	51.75	-98.25	5	0.142857142857143
1931	51.75	-98.75	12	0.342857142857143
1932	51.75	-99.25	8	0.228571428571429
1933	51.75	-99.75	4	0.114285714285714
1934	51.75	-100.25	0	0
1935	51.75	-100.75	3	0.0857142857142857
1936	51.75	-101.25	0	0
1937	51.75	-101.75	0	0
1938	51.75	-102.25	0	0
1939	51.75	-102.75	0	0
1940	51.75	-103.25	2	0.0571428571428571
1941	51.75	-103.75	0	0
1942	51.75	-104.25	0	0
1943	51.75	-104.75	1	0.0285714285714286
1944	51.75	-105.25	0	0
1945	51.75	-105.75	0	0
1946	51.75	-106.25	0	0
1947	51.75	-106.75	0	0
1948	51.75	-107.25	0	0
1949	51.75	-107.75	0	0
1950	51.75	-108.25	0	0
1951	51.75	-108.75	0	0
1952	51.75	-109.25	0	0
1953	51.75	-109.75	0	0
1954	51.75	-110.25	0	0
1955	51.75	-110.75	0	0
1956	51.75	-111.25	0	0
1957	51.75	-111.75	0	0
1958	51.75	-112.25	0	0
1959	51.75	-112.75	0	0
1960	51.75	-113.25	0	0
1961	51.75	-113.75	0	0
1962	51.75	-114.25	0	0
1963	51.75	-114.75	0	0
1964	51.75	-115.25	0	0
1965	51.75	-115.75	7	0.2
1966	51.75	-116.25	3	0.0857142857142857
1967	51.75	-116.75	1	0.0285714285714286
1968	51.75	-117.25	1	0.0285714285714286
1969	51.75	-117.75	1	0.0285714285714286
1970	51.75	-118.25	5	0.142857142857143
1971	51.75	-118.75	6	0.171428571428571
1972	51.75	-119.25	5	0.142857142857143
1973	51.75	-119.75	6	0.171428571428571
1974	51.75	-120.25	2	0.0571428571428571
1975	51.75	-120.75	2	0.0571428571428571
1976	51.75	-121.25	2	0.0571428571428571
1977	51.75	-121.75	1	0.0285714285714286
1978	51.75	-122.25	3	0.0857142857142857
1979	51.75	-122.75	0	0
1980	51.75	-123.25	4	0.114285714285714
1981	51.75	-123.75	1	0.0285714285714286
1982	51.75	-124.25	4	0.114285714285714
1983	51.75	-124.75	0	0
1984	51.75	-125.25	1	0.0285714285714286
1985	51.75	-125.75	1	0.0285714285714286
1986	51.75	-126.25	0	0
1987	51.75	-126.75	0	0
1988	51.75	-127.25	0	0
1989	51.75	-127.75	0	0
1990	51.75	-128.25	0	0
1991	51.75	-128.75	0	0
1992	51.75	-129.25	0	0
1993	51.75	-129.75	0	0
1994	51.75	-130.25	0	0
1995	51.75	-130.75	0	0
1996	51.75	-131.25	0	0
1997	51.75	-131.75	0	0
1998	51.75	-132.25	0	0
1999	51.75	-132.75	0	0
[truncated: 5,201 more rows]
