# Supplementary material for: Environmental Conditions for Alternative Tree Cover States in HighLatitudes
Source: Copernicus journal article supplement (doi:10.5194/bg-2016-401), 2016-10-11
Supplement: Supplementary file 4 [file bg-2016-401-supplement.zip › Analysis/files_to_load_and_import/forest_open_bor.txt]

2.600000000000000000e+01
4.100000000000000000e+01
2.700000000000000000e+01
2.600000000000000000e+01
3.500000000000000000e+01
3.300000000000000000e+01
2.400000000000000000e+01
2.800000000000000000e+01
2.100000000000000000e+01
2.300000000000000000e+01
4.200000000000000000e+01
2.400000000000000000e+01
2.800000000000000000e+01
3.300000000000000000e+01
2.500000000000000000e+01
2.000000000000000000e+01
3.900000000000000000e+01
2.600000000000000000e+01
2.000000000000000000e+01
3.100000000000000000e+01
3.000000000000000000e+01
3.400000000000000000e+01
2.000000000000000000e+01
4.000000000000000000e+01
3.300000000000000000e+01
3.600000000000000000e+01
3.100000000000000000e+01
2.200000000000000000e+01
2.800000000000000000e+01
7.000000000000000000e+01
5.800000000000000000e+01
6.000000000000000000e+01
5.800000000000000000e+01
6.000000000000000000e+01
7.200000000000000000e+01
5.400000000000000000e+01
5.100000000000000000e+01
6.800000000000000000e+01
5.100000000000000000e+01
5.400000000000000000e+01
3.000000000000000000e+01
2.400000000000000000e+01
2.300000000000000000e+01
3.800000000000000000e+01
3.400000000000000000e+01
3.900000000000000000e+01
3.100000000000000000e+01
4.400000000000000000e+01
3.500000000000000000e+01
3.900000000000000000e+01
4.300000000000000000e+01
7.200000000000000000e+01
7.400000000000000000e+01
5.200000000000000000e+01
5.800000000000000000e+01
5.300000000000000000e+01
5.100000000000000000e+01
4.500000000000000000e+01
4.900000000000000000e+01
6.200000000000000000e+01
5.400000000000000000e+01
5.300000000000000000e+01
3.000000000000000000e+01
3.300000000000000000e+01
4.100000000000000000e+01
3.600000000000000000e+01
3.100000000000000000e+01
3.800000000000000000e+01
3.900000000000000000e+01
3.300000000000000000e+01
3.300000000000000000e+01
2.900000000000000000e+01
3.500000000000000000e+01
3.200000000000000000e+01
2.900000000000000000e+01
2.900000000000000000e+01
3.100000000000000000e+01
3.400000000000000000e+01
4.200000000000000000e+01
2.500000000000000000e+01
2.700000000000000000e+01
2.900000000000000000e+01
2.900000000000000000e+01
6.200000000000000000e+01
5.300000000000000000e+01
6.900000000000000000e+01
5.100000000000000000e+01
4.700000000000000000e+01
5.500000000000000000e+01
5.200000000000000000e+01
7.100000000000000000e+01
5.800000000000000000e+01
6.500000000000000000e+01
5.600000000000000000e+01
5.400000000000000000e+01
7.900000000000000000e+01
4.600000000000000000e+01
6.400000000000000000e+01
7.600000000000000000e+01
6.600000000000000000e+01
4.900000000000000000e+01
6.000000000000000000e+01
6.900000000000000000e+01
5.200000000000000000e+01
5.000000000000000000e+01
5.200000000000000000e+01
7.300000000000000000e+01
4.700000000000000000e+01
2.600000000000000000e+01
2.300000000000000000e+01
3.300000000000000000e+01
2.300000000000000000e+01
3.700000000000000000e+01
4.300000000000000000e+01
2.900000000000000000e+01
2.600000000000000000e+01
4.000000000000000000e+01
4.300000000000000000e+01
3.800000000000000000e+01
2.300000000000000000e+01
3.200000000000000000e+01
4.100000000000000000e+01
3.000000000000000000e+01
3.400000000000000000e+01
4.400000000000000000e+01
3.400000000000000000e+01
4.400000000000000000e+01
4.000000000000000000e+01
3.500000000000000000e+01
3.800000000000000000e+01
5.300000000000000000e+01
4.700000000000000000e+01
6.000000000000000000e+01
6.300000000000000000e+01
6.200000000000000000e+01
6.500000000000000000e+01
5.800000000000000000e+01
5.700000000000000000e+01
5.400000000000000000e+01
5.100000000000000000e+01
5.400000000000000000e+01
6.300000000000000000e+01
6.600000000000000000e+01
6.900000000000000000e+01
6.000000000000000000e+01
6.600000000000000000e+01
5.600000000000000000e+01
4.700000000000000000e+01
6.700000000000000000e+01
5.800000000000000000e+01
5.600000000000000000e+01
6.300000000000000000e+01
6.000000000000000000e+01
6.300000000000000000e+01
5.200000000000000000e+01
6.500000000000000000e+01
6.400000000000000000e+01
7.600000000000000000e+01
6.300000000000000000e+01
5.000000000000000000e+01
4.900000000000000000e+01
5.900000000000000000e+01
7.400000000000000000e+01
6.800000000000000000e+01
4.500000000000000000e+01
6.500000000000000000e+01
5.500000000000000000e+01
2.700000000000000000e+01
2.900000000000000000e+01
2.000000000000000000e+01
3.200000000000000000e+01
2.200000000000000000e+01
2.900000000000000000e+01
2.100000000000000000e+01
2.400000000000000000e+01
3.300000000000000000e+01
2.900000000000000000e+01
2.400000000000000000e+01
2.900000000000000000e+01
4.000000000000000000e+01
4.100000000000000000e+01
3.700000000000000000e+01
3.600000000000000000e+01
3.600000000000000000e+01
2.800000000000000000e+01
4.200000000000000000e+01
2.100000000000000000e+01
2.200000000000000000e+01
3.500000000000000000e+01
3.600000000000000000e+01
2.000000000000000000e+01
4.000000000000000000e+01
3.800000000000000000e+01
2.100000000000000000e+01
2.600000000000000000e+01
3.900000000000000000e+01
3.600000000000000000e+01
7.100000000000000000e+01
6.700000000000000000e+01
6.600000000000000000e+01
4.600000000000000000e+01
6.000000000000000000e+01
5.600000000000000000e+01
6.300000000000000000e+01
6.200000000000000000e+01
6.400000000000000000e+01
4.800000000000000000e+01
6.000000000000000000e+01
6.600000000000000000e+01
6.800000000000000000e+01
6.100000000000000000e+01
6.300000000000000000e+01
6.500000000000000000e+01
6.900000000000000000e+01
6.900000000000000000e+01
4.800000000000000000e+01
4.900000000000000000e+01
6.700000000000000000e+01
5.200000000000000000e+01
4.800000000000000000e+01
5.000000000000000000e+01
6.900000000000000000e+01
5.800000000000000000e+01
4.900000000000000000e+01
5.000000000000000000e+01
4.700000000000000000e+01
5.000000000000000000e+01
6.600000000000000000e+01
5.000000000000000000e+01
6.600000000000000000e+01
5.800000000000000000e+01
5.400000000000000000e+01
5.700000000000000000e+01
5.800000000000000000e+01
5.000000000000000000e+01
5.800000000000000000e+01
5.500000000000000000e+01
2.000000000000000000e+01
3.100000000000000000e+01
3.600000000000000000e+01
3.400000000000000000e+01
3.100000000000000000e+01
2.900000000000000000e+01
3.300000000000000000e+01
3.100000000000000000e+01
3.000000000000000000e+01
3.800000000000000000e+01
3.700000000000000000e+01
4.100000000000000000e+01
3.800000000000000000e+01
3.000000000000000000e+01
3.900000000000000000e+01
4.000000000000000000e+01
4.400000000000000000e+01
4.400000000000000000e+01
3.300000000000000000e+01
3.700000000000000000e+01
4.100000000000000000e+01
3.700000000000000000e+01
4.300000000000000000e+01
3.900000000000000000e+01
4.800000000000000000e+01
4.800000000000000000e+01
5.400000000000000000e+01
6.400000000000000000e+01
5.700000000000000000e+01
6.800000000000000000e+01
6.100000000000000000e+01
5.700000000000000000e+01
5.100000000000000000e+01
5.300000000000000000e+01
4.900000000000000000e+01
4.700000000000000000e+01
5.100000000000000000e+01
6.900000000000000000e+01
5.800000000000000000e+01
5.700000000000000000e+01
6.800000000000000000e+01
4.600000000000000000e+01
6.000000000000000000e+01
6.300000000000000000e+01
5.200000000000000000e+01
6.200000000000000000e+01
5.900000000000000000e+01
6.200000000000000000e+01
5.800000000000000000e+01
4.800000000000000000e+01
4.700000000000000000e+01
4.600000000000000000e+01
4.800000000000000000e+01
6.400000000000000000e+01
6.100000000000000000e+01
5.400000000000000000e+01
7.300000000000000000e+01
4.700000000000000000e+01
5.500000000000000000e+01
5.600000000000000000e+01
6.200000000000000000e+01
4.600000000000000000e+01
4.800000000000000000e+01
4.600000000000000000e+01
6.500000000000000000e+01
7.000000000000000000e+01
6.900000000000000000e+01
5.100000000000000000e+01
5.200000000000000000e+01
6.400000000000000000e+01
4.700000000000000000e+01
