# Supplementary material for: Environmental Conditions for Alternative Tree Cover States in HighLatitudes
Source: Copernicus journal article supplement (doi:10.5194/bg-2016-401), 2016-10-11
Supplement: Supplementary file 4 [file bg-2016-401-supplement.zip › GAM_Comparison/EA EAST MTmin from CRU]

EA EAST MTmin from CRU

Family: gaussian 
Link function: identity 

Formula:
TCF ~ s(MAR) + s(MTmin) + s(MSSM) + s(ST) + s(PZI) + s(FF)

Parametric coefficients:
            Estimate Std. Error t value Pr(>|t|)    
(Intercept)  20.5660     0.1882   109.3   <2e-16 ***
---
Signif. codes:  0 ‘***’ 0.001 ‘**’ 0.01 ‘*’ 0.05 ‘.’ 0.1 ‘ ’ 1

Approximate significance of smooth terms:
           edf Ref.df      F  p-value    
s(MAR)   8.066  8.772  13.09  < 2e-16 ***
s(MTmin) 8.870  8.994  53.86  < 2e-16 ***
s(MSSM)  7.911  8.692  10.46 1.59e-15 ***
s(ST)    8.108  8.692  22.32  < 2e-16 ***
s(PZI)   8.537  8.933 132.72  < 2e-16 ***
s(FF)    5.528  6.506  26.59  < 2e-16 ***
---
Signif. codes:  0 ‘***’ 0.001 ‘**’ 0.01 ‘*’ 0.05 ‘.’ 0.1 ‘ ’ 1

R-sq.(adj) =  0.549   Deviance explained = 55.2%
GCV = 208.89  Scale est. = 207.18    n = 5848


Family: gaussian 
Link function: identity 

Formula:
TCF ~ s(MTmin)

Parametric coefficients:
            Estimate Std. Error t value Pr(>|t|)    
(Intercept)  20.5660     0.2238    91.9   <2e-16 ***
---
Signif. codes:  0 ‘***’ 0.001 ‘**’ 0.01 ‘*’ 0.05 ‘.’ 0.1 ‘ ’ 1

Approximate significance of smooth terms:
           edf Ref.df     F p-value    
s(MTmin) 8.861  8.994 368.6  <2e-16 ***
---
Signif. codes:  0 ‘***’ 0.001 ‘**’ 0.01 ‘*’ 0.05 ‘.’ 0.1 ‘ ’ 1

R-sq.(adj) =  0.362   Deviance explained = 36.3%
GCV = 293.35  Scale est. = 292.86    n = 5848
