# Supplementary material for: Environmental Conditions for Alternative Tree Cover States in HighLatitudes
Source: Copernicus journal article supplement (doi:10.5194/bg-2016-401), 2016-10-11
Supplement: Supplementary file 4 [file bg-2016-401-supplement.zip › GAM_Comparison/EA EAST MTmin from NCEP]

EA EAST MTmin from NCEP

Family: gaussian 
Link function: identity 

Formula:
TCF ~ s(MAR) + s(MTmin) + s(MSSM) + s(ST) + s(PZI) + s(FF)

Parametric coefficients:
            Estimate Std. Error t value Pr(>|t|)    
(Intercept)  20.5660     0.1942   105.9   <2e-16 ***
---
Signif. codes:  0 ‘***’ 0.001 ‘**’ 0.01 ‘*’ 0.05 ‘.’ 0.1 ‘ ’ 1

Approximate significance of smooth terms:
           edf Ref.df     F p-value    
s(MAR)   8.262  8.850 13.41  <2e-16 ***
s(MTmin) 7.813  8.662 11.69  <2e-16 ***
s(MSSM)  7.647  8.544 20.12  <2e-16 ***
s(ST)    8.028  8.641 25.20  <2e-16 ***
s(PZI)   8.635  8.958 59.48  <2e-16 ***
s(FF)    5.023  5.988 35.21  <2e-16 ***
---
Signif. codes:  0 ‘***’ 0.001 ‘**’ 0.01 ‘*’ 0.05 ‘.’ 0.1 ‘ ’ 1

R-sq.(adj) =  0.519   Deviance explained = 52.3%
GCV = 222.26  Scale est. = 220.49    n = 5848


Family: gaussian 
Link function: identity 

Formula:
TCF ~ s(MTmin)

Parametric coefficients:
            Estimate Std. Error t value Pr(>|t|)    
(Intercept)   20.566      0.217   94.79   <2e-16 ***
---
Signif. codes:  0 ‘***’ 0.001 ‘**’ 0.01 ‘*’ 0.05 ‘.’ 0.1 ‘ ’ 1

Approximate significance of smooth terms:
           edf Ref.df     F p-value    
s(MTmin) 8.509  8.932 436.7  <2e-16 ***
---
Signif. codes:  0 ‘***’ 0.001 ‘**’ 0.01 ‘*’ 0.05 ‘.’ 0.1 ‘ ’ 1

R-sq.(adj) =    0.4   Deviance explained = 40.1%
GCV = 275.71  Scale est. = 275.26    n = 5848
