# Supplementary material for: Environmental Conditions for Alternative Tree Cover States in HighLatitudes
Source: Copernicus journal article supplement (doi:10.5194/bg-2016-401), 2016-10-11
Supplement: Supplementary file 4 [file bg-2016-401-supplement.zip › GAM_Comparison/EA WEST MTmin from CRU]

EA WEST MTmin from CRU

Family: gaussian 
Link function: identity 

Formula:
TCF ~ s(MAR) + s(FF) + s(MTmin) + s(PZI) + s(ST, k = k_ST) + 
    s(MSSM)

Parametric coefficients:
            Estimate Std. Error t value Pr(>|t|)    
(Intercept)  34.2777     0.4393   78.03   <2e-16 ***
---
Signif. codes:  0 ‘***’ 0.001 ‘**’ 0.01 ‘*’ 0.05 ‘.’ 0.1 ‘ ’ 1

Approximate significance of smooth terms:
           edf Ref.df      F  p-value    
s(MAR)   5.190  6.404  3.647  0.00106 ** 
s(FF)    5.862  6.937  5.307 5.91e-06 ***
s(MTmin) 7.786  8.607  8.960 1.19e-12 ***
s(PZI)   5.024  6.165  2.551  0.01752 *  
s(ST)    5.785  6.617 19.954  < 2e-16 ***
s(MSSM)  6.088  7.304  6.101 3.35e-07 ***
---
Signif. codes:  0 ‘***’ 0.001 ‘**’ 0.01 ‘*’ 0.05 ‘.’ 0.1 ‘ ’ 1

R-sq.(adj) =  0.488   Deviance explained =   50%
GCV = 308.13  Scale est. = 300.87    n = 1559


Family: gaussian 
Link function: identity 

Formula:
TCF ~ s(MTmin)

Parametric coefficients:
            Estimate Std. Error t value Pr(>|t|)    
(Intercept)  34.2777     0.5535   61.93   <2e-16 ***
---
Signif. codes:  0 ‘***’ 0.001 ‘**’ 0.01 ‘*’ 0.05 ‘.’ 0.1 ‘ ’ 1

Approximate significance of smooth terms:
           edf Ref.df    F p-value    
s(MTmin) 8.531  8.938 40.8  <2e-16 ***
---
Signif. codes:  0 ‘***’ 0.001 ‘**’ 0.01 ‘*’ 0.05 ‘.’ 0.1 ‘ ’ 1

R-sq.(adj) =  0.188   Deviance explained = 19.2%
GCV = 480.59  Scale est. = 477.66    n = 1559
