# Supplementary material for: Environmental Conditions for Alternative Tree Cover States in HighLatitudes
Source: Copernicus journal article supplement (doi:10.5194/bg-2016-401), 2016-10-11
Supplement: Supplementary file 4 [file bg-2016-401-supplement.zip › GAM_Comparison/EA WEST MTmin from NCEP]

EA WEST MTmin from NCEP

Family: gaussian 
Link function: identity 

Formula:
TCF ~ s(MAR) + s(FF) + s(MTmin) + s(PZI) + s(ST, k = k_ST) + 
    s(MSSM)

Parametric coefficients:
            Estimate Std. Error t value Pr(>|t|)    
(Intercept)  34.2777     0.4404   77.83   <2e-16 ***
---
Signif. codes:  0 ‘***’ 0.001 ‘**’ 0.01 ‘*’ 0.05 ‘.’ 0.1 ‘ ’ 1

Approximate significance of smooth terms:
           edf Ref.df      F  p-value    
s(MAR)   4.777  5.914  3.466  0.00226 ** 
s(FF)    6.042  7.117  4.908 1.54e-05 ***
s(MTmin) 7.553  8.453  9.287 5.41e-13 ***
s(PZI)   2.459  3.102  8.842 6.78e-06 ***
s(ST)    5.665  6.491 26.912  < 2e-16 ***
s(MSSM)  1.265  1.485 26.876 5.14e-09 ***
---
Signif. codes:  0 ‘***’ 0.001 ‘**’ 0.01 ‘*’ 0.05 ‘.’ 0.1 ‘ ’ 1

R-sq.(adj) =  0.486   Deviance explained = 49.5%
GCV = 308.11  Scale est. = 302.43    n = 1559


Family: gaussian 
Link function: identity 

Formula:
TCF ~ s(MTmin)

Parametric coefficients:
            Estimate Std. Error t value Pr(>|t|)    
(Intercept)  34.2777     0.5244   65.36   <2e-16 ***
---
Signif. codes:  0 ‘***’ 0.001 ‘**’ 0.01 ‘*’ 0.05 ‘.’ 0.1 ‘ ’ 1

Approximate significance of smooth terms:
           edf Ref.df     F p-value    
s(MTmin) 4.173  5.164 109.7  <2e-16 ***
---
Signif. codes:  0 ‘***’ 0.001 ‘**’ 0.01 ‘*’ 0.05 ‘.’ 0.1 ‘ ’ 1

R-sq.(adj) =  0.271   Deviance explained = 27.3%
GCV = 430.21  Scale est. = 428.79    n = 1559
