# Supplementary material for: Environmental Conditions for Alternative Tree Cover States in HighLatitudes
Source: Copernicus journal article supplement (doi:10.5194/bg-2016-401), 2016-10-11
Supplement: Supplementary file 4 [file bg-2016-401-supplement.zip › GAM_Comparison/NA EAST MTmin from CRU]

NA EAST MTmin from CRU

Family: gaussian 
Link function: identity 

Formula:
TCF ~ s(MAR) + s(FF) + s(MTmin) + s(PZI) + s(ST) + s(MSSM)

Parametric coefficients:
            Estimate Std. Error t value Pr(>|t|)    
(Intercept)  27.5279     0.2675   102.9   <2e-16 ***
---
Signif. codes:  0 ‘***’ 0.001 ‘**’ 0.01 ‘*’ 0.05 ‘.’ 0.1 ‘ ’ 1

Approximate significance of smooth terms:
           edf Ref.df      F  p-value    
s(MAR)   8.635  8.954  6.733 1.75e-09 ***
s(FF)    7.719  8.495  6.139 4.23e-08 ***
s(MTmin) 4.790  6.009  1.462    0.187    
s(PZI)   2.253  2.788 44.262  < 2e-16 ***
s(ST)    6.757  7.658 13.938  < 2e-16 ***
s(MSSM)  8.066  8.769  5.460 3.15e-07 ***
---
Signif. codes:  0 ‘***’ 0.001 ‘**’ 0.01 ‘*’ 0.05 ‘.’ 0.1 ‘ ’ 1

R-sq.(adj) =   0.77   Deviance explained = 77.4%
GCV = 129.93  Scale est. = 127.06    n = 1775


Family: gaussian 
Link function: identity 

Formula:
TCF ~ s(MTmin)

Parametric coefficients:
            Estimate Std. Error t value Pr(>|t|)    
(Intercept)  27.5279     0.3142   87.61   <2e-16 ***
---
Signif. codes:  0 ‘***’ 0.001 ‘**’ 0.01 ‘*’ 0.05 ‘.’ 0.1 ‘ ’ 1

Approximate significance of smooth terms:
           edf Ref.df   F p-value    
s(MTmin) 6.594  7.737 491  <2e-16 ***
---
Signif. codes:  0 ‘***’ 0.001 ‘**’ 0.01 ‘*’ 0.05 ‘.’ 0.1 ‘ ’ 1

R-sq.(adj) =  0.682   Deviance explained = 68.3%
GCV = 175.99  Scale est. = 175.24    n = 1775
