# Supplementary material for: Environmental Conditions for Alternative Tree Cover States in HighLatitudes
Source: Copernicus journal article supplement (doi:10.5194/bg-2016-401), 2016-10-11
Supplement: Supplementary file 4 [file bg-2016-401-supplement.zip › GAM_Comparison/NA EAST MTmin from NCEP]

NA EAST MTmin from NCEP

Family: gaussian 
Link function: identity 

Formula:
TCF ~ s(MAR) + s(FF) + s(MTmin) + s(PZI) + s(ST) + s(MSSM)

Parametric coefficients:
            Estimate Std. Error t value Pr(>|t|)    
(Intercept)  27.5279     0.2663   103.4   <2e-16 ***
---
Signif. codes:  0 ‘***’ 0.001 ‘**’ 0.01 ‘*’ 0.05 ‘.’ 0.1 ‘ ’ 1

Approximate significance of smooth terms:
           edf Ref.df      F  p-value    
s(MAR)   8.303  8.864  6.027 3.22e-08 ***
s(FF)    7.721  8.498  6.672 6.21e-09 ***
s(MTmin) 4.503  5.671  4.738 0.000139 ***
s(PZI)   1.892  2.324 27.918 1.09e-13 ***
s(ST)    6.560  7.469 13.576  < 2e-16 ***
s(MSSM)  8.095  8.781  5.547 2.24e-07 ***
---
Signif. codes:  0 ‘***’ 0.001 ‘**’ 0.01 ‘*’ 0.05 ‘.’ 0.1 ‘ ’ 1

R-sq.(adj) =  0.772   Deviance explained = 77.6%
GCV = 128.62  Scale est. = 125.86    n = 1775


Family: gaussian 
Link function: identity 

Formula:
TCF ~ s(MTmin)

Parametric coefficients:
            Estimate Std. Error t value Pr(>|t|)    
(Intercept)   27.528      0.296   92.98   <2e-16 ***
---
Signif. codes:  0 ‘***’ 0.001 ‘**’ 0.01 ‘*’ 0.05 ‘.’ 0.1 ‘ ’ 1

Approximate significance of smooth terms:
           edf Ref.df     F p-value    
s(MTmin) 6.211  7.382 609.3  <2e-16 ***
---
Signif. codes:  0 ‘***’ 0.001 ‘**’ 0.01 ‘*’ 0.05 ‘.’ 0.1 ‘ ’ 1

R-sq.(adj) =  0.718   Deviance explained = 71.9%
GCV =  156.2  Scale est. = 155.57    n = 1775
