# Supplementary material for: Environmental Conditions for Alternative Tree Cover States in HighLatitudes
Source: Copernicus journal article supplement (doi:10.5194/bg-2016-401), 2016-10-11
Supplement: Supplementary file 4 [file bg-2016-401-supplement.zip › GAM_Comparison/NA WEST MTmin from CRU]

NA WEST MTmin from CRU

Family: gaussian 
Link function: identity 

Formula:
TCF ~ s(MAR) + s(FF) + s(MTmin) + s(PZI) + s(ST) + s(MSSM)

Parametric coefficients:
            Estimate Std. Error t value Pr(>|t|)    
(Intercept)  22.3581     0.2678   83.49   <2e-16 ***
---
Signif. codes:  0 ‘***’ 0.001 ‘**’ 0.01 ‘*’ 0.05 ‘.’ 0.1 ‘ ’ 1

Approximate significance of smooth terms:
           edf Ref.df      F  p-value    
s(MAR)   7.716  8.589 20.568  < 2e-16 ***
s(FF)    7.522  8.215  9.224 8.16e-13 ***
s(MTmin) 6.443  7.679 39.467  < 2e-16 ***
s(PZI)   6.995  8.036 42.290  < 2e-16 ***
s(ST)    8.467  8.852 26.448  < 2e-16 ***
s(MSSM)  1.000  1.000  0.011    0.918    
---
Signif. codes:  0 ‘***’ 0.001 ‘**’ 0.01 ‘*’ 0.05 ‘.’ 0.1 ‘ ’ 1

R-sq.(adj) =  0.525   Deviance explained = 53.1%
GCV = 224.75  Scale est. = 221.9     n = 3094


Family: gaussian 
Link function: identity 

Formula:
TCF ~ s(MTmin)

Parametric coefficients:
            Estimate Std. Error t value Pr(>|t|)    
(Intercept)  22.3581     0.3164   70.66   <2e-16 ***
---
Signif. codes:  0 ‘***’ 0.001 ‘**’ 0.01 ‘*’ 0.05 ‘.’ 0.1 ‘ ’ 1

Approximate significance of smooth terms:
           edf Ref.df     F p-value    
s(MTmin) 8.292  8.864 177.9  <2e-16 ***
---
Signif. codes:  0 ‘***’ 0.001 ‘**’ 0.01 ‘*’ 0.05 ‘.’ 0.1 ‘ ’ 1

R-sq.(adj) =  0.338   Deviance explained = 33.9%
GCV = 310.73  Scale est. = 309.79    n = 3094
