# Supplementary material for: Environmental Conditions for Alternative Tree Cover States in HighLatitudes
Source: Copernicus journal article supplement (doi:10.5194/bg-2016-401), 2016-10-11
Supplement: Supplementary file 4 [file bg-2016-401-supplement.zip › GAM_Comparison/NA WEST MTmin from NCEP]

NA WEST MTmin from NCEP

Family: gaussian 
Link function: identity 

Formula:
TCF ~ s(MAR) + s(FF) + s(MTmin) + s(PZI) + s(ST) + s(MSSM)

Parametric coefficients:
            Estimate Std. Error t value Pr(>|t|)    
(Intercept)   22.358      0.261   85.65   <2e-16 ***
---
Signif. codes:  0 ‘***’ 0.001 ‘**’ 0.01 ‘*’ 0.05 ‘.’ 0.1 ‘ ’ 1

Approximate significance of smooth terms:
           edf Ref.df      F  p-value    
s(MAR)   8.620  8.959 16.093  < 2e-16 ***
s(FF)    7.562  8.246  7.895 9.72e-11 ***
s(MTmin) 7.855  8.687 51.374  < 2e-16 ***
s(PZI)   7.157  8.174 58.611  < 2e-16 ***
s(ST)    8.505  8.872 26.576  < 2e-16 ***
s(MSSM)  7.837  8.661  3.675 0.000188 ***
---
Signif. codes:  0 ‘***’ 0.001 ‘**’ 0.01 ‘*’ 0.05 ‘.’ 0.1 ‘ ’ 1

R-sq.(adj) =  0.549   Deviance explained = 55.6%
GCV =  214.2  Scale est. = 210.84    n = 3094


Family: gaussian 
Link function: identity 

Formula:
TCF ~ s(MTmin)

Parametric coefficients:
            Estimate Std. Error t value Pr(>|t|)    
(Intercept)   22.358      0.306   73.06   <2e-16 ***
---
Signif. codes:  0 ‘***’ 0.001 ‘**’ 0.01 ‘*’ 0.05 ‘.’ 0.1 ‘ ’ 1

Approximate significance of smooth terms:
          edf Ref.df     F p-value    
s(MTmin) 8.54  8.943 212.2  <2e-16 ***
---
Signif. codes:  0 ‘***’ 0.001 ‘**’ 0.01 ‘*’ 0.05 ‘.’ 0.1 ‘ ’ 1

R-sq.(adj) =   0.38   Deviance explained = 38.2%
GCV = 290.65  Scale est. = 289.76    n = 3094
